# Supplementary material for: Physiological roles of endocytosis and presynaptic scaffold in vesicle replenishment at fast and slow central synapses
Source: eLife. 2024 Jun 3;12:RP90497. doi: 10.7554/eLife.90497 (PMC11147502; doi:10.7554/eLife.90497)
Supplement: Figure 1—figure supplement 1—source data 1. [file elife-90497-fig1-figsupp1-data1.xlsx]

## Sheet: 5 ms
		Figure S1B_traces						Endo Rate_Bar graph
		Time (S)	Control		Dyn 1 PRD				Ctrl	Dyn1-PRD_10Hz
			Mean	SEM	Mean	SEM		Mean	2.88e-14	2.27e-15
								SEM	3.74e-15	2.25e-15
		0.01	3.7e-15	2.02e-15	4.92234e-15	2.05822e-14		n number	5	5
		0.03	4.3e-15	2.82e-15	3.72234e-15	1.2523e-14		p-value	-	0.0006
		0.05	3.12e-15	5.09e-15	4.04908e-15	1.30151e-14
		0.07	6.29e-15	2.91e-15	1.65073e-15	1.09864e-14
		0.09	4.7e-15	6.46e-15	1.4325e-15	1.08267e-14
		0.11	2.14e-15	1.79e-15	3.92234e-15	1.09805e-14
		0.13	8.36e-16	2.96e-15	3.62538e-15	1.07754e-14
		0.15	1.13e-14	5.77e-15	2.11804e-15	1.30549e-14
		0.17	1.72e-15	2.2e-15	4.56055e-16	1.03211e-14
		0.19	3.04e-15	3.44e-15	1.62019e-15	1.04413e-14
		0.21	6.28e-15	3.96e-15	2.01069e-15	1.30594e-14
		0.23	5.48e-15	5.78e-15	-1.24497e-15	1.03785e-14
		0.25	1.21e-15	5.41e-15	5.10416e-15	9.39654e-15
		0.27	5.13e-15	4.64e-15	-2.90909e-16	1.0561e-14
		0.29	3.88e-15	2.77e-15	3.95857e-16	1.19515e-14
		0.31	-4.97e-16	2.67e-15	5.84024e-16	1.03784e-14
		0.33	3.6e-16	2.43e-15	1.03094e-15	9.38774e-15
		0.35	1.22e-15	1.21e-15	5.1179e-15	7.83487e-15
		0.37	5.55e-15	3.75e-15	9.18241e-16	9.13803e-15
		0.39	3.48e-15	3.59e-15	5.73303e-16	9.06832e-15
		0.41	3.15e-15	2.63e-15	-9.21423e-16	8.20187e-15
		0.43	1.29e-16	2.66e-15	4.01485e-16	9.56772e-15
		0.45	1.8e-15	2.53e-15	-2.17791e-15	9.15364e-15
		0.47	-5.3e-15	2.85e-15	1.00493e-15	9.59298e-15
		0.49	-3.7e-15	4.87e-15	2.82834e-15	1.08974e-14
		0.51	-5.18e-15	2.08e-15	-1.08635e-15	9.03923e-15
		0.53	2.08e-15	4.71e-15	-2.42267e-15	9.18461e-15
		0.55	5.87e-15	5.14e-15	-1.05923e-16	1.04892e-14
		0.57	1.42e-15	5.07e-15	-1.36286e-15	8.68875e-15
		0.59	6.34e-15	5.75e-15	5.55355e-16	9.1609e-15
		0.61	1.11e-15	3.73e-15	-2.07506e-15	8.95586e-15
		0.63	-7.09e-16	7.12e-15	3.18192e-15	7.9334e-15
		0.65	3.68e-16	5.21e-15	-8.50649e-16	8.82046e-15
		0.67	1.6e-15	4.17e-15	-5.22318e-15	1.04942e-14
		0.69	-9.77e-18	5.91e-15	-1.37863e-15	1.10049e-14
		0.71	-9.97e-15	1.01e-14	5.16879e-15	8.83966e-15
		0.73	-5.83e-15	5.31e-15	-4.49856e-15	1.25481e-14
		0.75	-3.8e-15	4.31e-15	-1.55829e-15	1.15119e-14
		0.77	-1.53e-15	5.51e-15	5.47912e-15	8.11118e-15
		0.79	-5.3e-15	3.02e-15	-3.07162e-15	9.52425e-15
		0.81	-1.05e-14	7.28e-15	-2.48075e-16	1.08513e-14
		0.83	-2.37e-15	3.92e-15	9.62864e-16	6.91985e-15
		0.85	-9.33e-15	5.19e-15	-2.22614e-15	9.00161e-15
		0.87	-6.79e-15	3.78e-15	1.59249e-15	8.56202e-15
		0.89	-4.75e-15	9.84e-15	1.24417e-15	5.85691e-15
		0.91	-4.52e-16	2.74e-15	4.21798e-16	8.72316e-15
		0.93	-9.56e-15	8.45e-15	1.31077e-15	6.25564e-15
		0.95	-4.33e-15	6.77e-15	1.53158e-15	8.40803e-15
		0.97	-5.97e-15	8.92e-15	-2.50224e-15	8.10525e-15
		0.99	-3.97e-15	5.22e-15	1.691e-15	8.00714e-15
		1.01	-3.83e-15	6.67e-15	-2.15212e-15	8.23562e-15
		1.03	-5.84e-15	3.61e-15	1.74648e-15	8.72711e-15
		1.05	-8.8e-15	6.66e-15	-8.38762e-16	7.17542e-15
		1.07	-3.39e-15	2.53e-15	8.58612e-15	7.56469e-15
		1.09	-5.71e-15	6.97e-15	-3.91116e-15	8.41142e-15
		1.11	-8.08e-15	5.67e-15	-2.30841e-16	1.03911e-14
		1.13	-5.84e-15	5.79e-15	-6.39798e-15	1.1986e-14
		1.15	-5.36e-15	8.41e-15	6.10239e-17	1.08373e-14
		1.17	-4.33e-15	5.54e-15	-2.39045e-15	1.02043e-14
		1.19	-2.57e-15	3.93e-15	6.61966e-15	8.22039e-15
		1.21	-4.71e-15	7.74e-15	4.46226e-15	9.90721e-15
		1.23	-6.8e-15	8.68e-15	-1.60565e-15	8.32668e-15
		1.25	-7.02e-15	7.97e-15	4.63088e-15	9.06808e-15
		1.27	-7.7e-15	8.9e-15	3.9616e-15	9.64063e-15
		1.29	-8.77e-16	5.75e-15	4.42352e-15	1.04364e-14
		1.31	-8.28e-15	7.01e-15	7.66135e-16	1.25293e-14
		1.33	-6.14e-15	6.34e-15	2.8783e-15	9.62693e-15
		1.35	-7.19e-16	3.31e-15	3.6723e-15	1.07552e-14
		1.37	-4.48e-15	2.35e-15	6.68057e-15	9.53638e-15
		1.39	-5.74e-15	7.19e-15	1.13179e-15	1.15271e-14
		1.41	-1.02e-14	2.48e-15	4.95486e-15	9.83598e-15
		1.43	2.35e-15	4e-15	3.52237e-15	1.39399e-14
		1.45	-9.49e-15	4.98e-15	6.05773e-15	1.12329e-14
		1.47	-6.83e-15	3.88e-15	8.73332e-15	8.93844e-15
		1.49	-2.71e-15	4.53e-15	6.87673e-15	1.2219e-14
		1.51	-1.02e-14	6.98e-15	5.94996e-15	1.09587e-14
		1.53	-7.88e-15	3.48e-15	6.52126e-15	9.51363e-15
		1.55	-3.8e-15	5.31e-15	5.86015e-15	1.02527e-14
		1.57	-1.7e-16	2.77e-15	3.1803e-15	1.05238e-14
		1.59	-9.38e-15	5.78e-15	6.512e-16	9.87089e-15
		1.61	-1.1e-14	5.51e-15	9.59645e-16	1.16147e-14
		1.63	-7.68e-15	5.43e-15	6.93282e-15	7.72048e-15
		1.65	-2.24e-15	4.75e-15	2.13163e-15	1.02292e-14
		1.67	-8.69e-15	6.53e-15	1.50852e-15	7.47297e-15
		1.69	-6e-15	5.1e-15	2.75616e-15	8.9114e-15
		1.71	-9.6e-15	4.34e-15	1.96221e-15	9.70464e-15
		1.73	-5.5e-15	6.8e-15	-6.39895e-16	8.18483e-15
		1.75	-1.26e-14	1.05e-14	9.73791e-15	6.18064e-15
		1.77	-4.18e-15	4.35e-15	4.4715e-15	6.80683e-15
		1.79	-2.17e-15	1.59e-15	1.80793e-15	6.05411e-15
		1.81	-4.73e-15	5.93e-15	5.90659e-15	7.00727e-15
		1.83	-5.03e-15	6.26e-15	4.87668e-15	5.58898e-15
		1.85	-4.23e-15	3.27e-15	3.89335e-15	7.7049e-15
		1.87	-9.37e-15	4.75e-15	5.00322e-15	7.0146e-15
		1.89	4.93e-16	4.11e-15	5.16629e-15	5.94728e-15
		1.91	-1.01e-14	9.19e-15	9.4552e-16	8.59289e-15
		1.93	-3.58e-15	4.45e-15	9.18732e-16	6.25694e-15
		1.95	-1.1e-14	8.77e-15	3.74369e-15	5.7766e-15
		1.97	-6.79e-15	4.8e-15	5.66611e-15	7.45375e-15
		1.99	-9.88e-15	7.68e-15	4.17667e-15	9.40535e-15
		2.01	-3.84e-15	3.64e-15	8.36483e-15	8.02839e-15
		2.03	-6.77e-15	1.05e-15	-2.44399e-15	8.8486e-15
		2.05	-3.16e-16	3.63e-15	5.84964e-15	1.04064e-14
		2.07	-6.1e-15	4.1e-15	4.09826e-15	1.29608e-14
		2.09	-1.2e-14	7.58e-15	1.18967e-14	1.21411e-14
		2.11	-9.01e-15	5.46e-15	8.51567e-15	1.06571e-14
		2.13	-8.8e-15	6.81e-15	8.76202e-15	1.16212e-14
		2.15	-7.55e-15	6.31e-15	1.11297e-14	1.10431e-14
		2.17	-5.67e-15	4.74e-15	6.243e-15	1.26966e-14
		2.19	-6.73e-15	4.39e-15	1.02397e-14	1.02394e-14
		2.21	-9.53e-15	5.07e-15	1.58877e-14	1.18716e-14
		2.23	-1.09e-14	7.78e-15	9.71015e-15	9.88701e-15
		2.25	-8.75e-15	4.22e-15	7.11447e-15	1.11806e-14
		2.27	-8.27e-15	7.34e-15	1.29812e-14	1.13393e-14
		2.29	-6.54e-15	3.79e-15	1.16771e-14	1.32263e-14
		2.31	-1.14e-14	8.03e-15	1.24135e-14	1.19315e-14
		2.33	-3.42e-15	7.56e-15	1.00011e-14	1.31828e-14
		2.35	1.25e-15	6.4e-15	8.67925e-15	1.45019e-14
		2.37	-5.81e-15	6.37e-15	1.08506e-14	1.3256e-14
		2.39	-5.92e-15	4.62e-15	1.34458e-14	1.25188e-14
		2.41	3.21e-16	5.88e-15	1.20891e-14	1.30715e-14
		2.43	-3.94e-15	7.42e-15	1.20399e-14	1.24327e-14
		2.45	-2.79e-15	5.83e-15	1.65394e-14	1.24029e-14
		2.47	2.05e-15	7.8e-15	1.57534e-14	6.97096e-15
		2.49	4.68e-16	4.24e-15	6.96414e-15	1.31199e-14
		2.51	-5.43e-15	7.78e-15	1.15882e-14	1.44726e-14
		2.53	-5.77e-15	5.19e-15	7.42832e-15	1.34335e-14
		2.55	-2.99e-15	7.56e-15	8.46554e-15	1.3048e-14
		2.57	-3.56e-15	3.76e-15	6.63948e-15	1.34382e-14
		2.59	-8.57e-15	4.87e-15	5.97793e-15	1.3673e-14
		2.61	-3.54e-15	7.51e-15	1.42963e-14	1.23144e-14
		2.63	-7.05e-15	5.64e-15	6.44785e-15	1.31917e-14
		2.65	-5.94e-15	5.08e-15	1.07987e-14	1.22214e-14
		2.67	-5.65e-15	7.66e-15	4.35775e-15	1.09896e-14
		2.69	-6.77e-15	5.54e-15	6.49799e-16	9.87023e-15
		2.71	-5.9e-15	8.83e-15	7.48065e-15	1.0875e-14
		2.73	-7.14e-15	6.51e-15	5.3002e-15	1.28534e-14
		2.75	-5.84e-15	6.39e-15	4.60843e-15	1.31576e-14
		2.77	-9.07e-15	7.04e-15	-9.76118e-16	1.47482e-14
		2.79	-5.76e-15	4.22e-15	6.3033e-15	1.36269e-14
		2.81	-1.44e-15	4.57e-15	2.71716e-15	1.28009e-14
		2.83	-9.5e-15	9.32e-15	9.19362e-16	1.18363e-14
		2.85	-9.94e-15	6.37e-15	4.77401e-15	1.4203e-14
		2.87	-9.29e-15	9.4e-15	6.12163e-15	1.22324e-14
		2.89	-7.75e-15	4.5e-15	1.31435e-15	1.13479e-14
		2.91	-6.07e-15	6.76e-15	1.31729e-15	1.60332e-14
		2.93	-7.41e-16	4.93e-15	1.0102e-14	1.00336e-14
		2.95	-6.25e-15	5.96e-15	6.56965e-15	1.08989e-14
		2.97	-2.27e-15	3.32e-15	2.51589e-15	1.04759e-14
		2.99	-3.65e-15	2.91e-15	6.45743e-15	1.26546e-14
		3.01	-6.54e-16	2.64e-15	-5.23198e-17	1.18104e-14
		3.03	-5.39e-15	5.02e-15	5.82506e-15	1.26871e-14
		3.05	-3.97e-15	6.54e-15	1.06176e-14	9.79377e-15
		3.07	-1.2e-15	5.94e-15	6.27648e-15	1.02483e-14
		3.09	-2.45e-15	5.67e-15	5.98094e-15	1.21794e-14
		3.11	-6.08e-15	4.17e-15	7.34212e-15	9.00661e-15
		3.13	-9.98e-16	5.79e-15	7.38353e-15	8.97906e-15
		3.15	-4.39e-15	6.92e-15	1.08043e-14	1.27146e-14
		3.17	-1.64e-15	2.87e-15	7.31217e-15	1.17793e-14
		3.19	8.46e-16	1.99e-15	5.57073e-15	1.46905e-14
		3.21	-6.1e-15	3.31e-15	5.56711e-15	8.74991e-15
		3.23	-6.01e-15	4.29e-15	6.13351e-15	1.05113e-14
		3.25	-3.03e-15	3.73e-15	5.63202e-15	1.04329e-14
		3.27	-2.61e-15	3.97e-15	7.57715e-15	8.20047e-15
		3.29	-1.52e-15	5.08e-15	5.88153e-15	7.62664e-15
		3.31	-5.05e-15	5.59e-15	7.32834e-15	1.08297e-14
		3.33	-6.15e-16	3.07e-15	8.67383e-15	6.66624e-15
		3.35	-1.79e-15	3.91e-15	1.10932e-14	6.16954e-15
		3.37	-9.99e-16	4.34e-15	8.7648e-15	7.7447e-15
		3.39	-5.65e-15	5.21e-15	5.4577e-15	8.02035e-15
		3.41	-5.07e-15	3.24e-15	2.21671e-15	5.79736e-15
		3.43	8.36e-17	2.39e-15	2.72035e-15	5.08178e-15
		3.45	-1.31e-15	2.38e-15	1.02755e-15	7.71851e-15
		3.47	-2.89e-15	5.9e-15	2.10464e-15	3.73132e-15
		3.49	1.42e-15	1.45e-15	6.4582e-15	5.54173e-15
		3.51	-3.11e-15	4.95e-15	1.12052e-15	5.76807e-15
		3.53	-7.29e-15	4.6e-15	1.79568e-15	4.1016e-15
		3.55	1.16e-15	3.05e-15	-4.04124e-15	4.33696e-15
		3.57	-9.22e-15	7.81e-15	-3.36122e-15	5.88519e-15
		3.59	-4.76e-15	4.1e-15	1.73792e-15	2.42191e-15
		3.61	-3.08e-15	1.83e-15	-1.46764e-16	4.2813e-15
		3.63	-3.8e-15	3.54e-15	1.77616e-16	3.70512e-15
		3.65	-2.56e-15	2.15e-15	-1.76121e-15	4.33907e-15
		3.67	-2.67e-15	3.91e-15	1.28228e-15	4.24373e-15
		3.69	-3.22e-15	5.95e-15	-2.58261e-15	4.22577e-15
		3.71	-1.62e-15	4.36e-15	-1.86366e-15	6.45687e-15
		3.73	-7.91e-16	4.4e-15	2.20935e-16	3.34397e-15
		3.75	-2.85e-15	2.94e-15	-1.10904e-15	3.26402e-15
		3.77	-1.17e-15	3.85e-15	4.03699e-17	5.15132e-15
		3.79	-8.53e-15	5.33e-15	2.63158e-15	6.2231e-15
		3.81	-1.75e-15	3.28e-15	-6.49753e-15	4.61776e-15
		3.83	-1.95e-15	6.58e-15	-8.26919e-15	3.61999e-15
		3.85	-1.97e-15	6.43e-15	-2.7089e-15	6.77187e-15
		3.87	1.64e-15	2.37e-15	-4.71227e-15	5.97438e-15
		3.89	3.77e-15	2.39e-15	-4.84894e-15	4.03147e-15
		3.91	-4.47e-15	4.93e-15	-2.97591e-15	1.04333e-14
		3.93	1.2e-15	3.13e-15	-1.03742e-14	3.55253e-15
		3.95	3.13e-15	3.75e-15	-4.81497e-15	4.33101e-15
		3.97	-1.94e-16	4.46e-15	-8.21848e-16	3.2109e-15
		3.99	-2.95e-15	4.72e-15	-4.09785e-16	2.96632e-15
		4.01	-4.19e-15	2.72e-15	-6.57189e-16	4.09603e-15
		4.03	-1.14e-15	5.6e-15	6.27427e-16	3.3712e-15
		4.05	-9.15e-15	5.55e-15	-4.44533e-16	5.5454e-15
		4.07	-8.76e-15	5.54e-15	2.76146e-16	1.14803e-15
		4.09	-6.13e-16	1.81e-15	4.58943e-15	2.50185e-15
		4.11	-2.29e-15	3.81e-15	3.91648e-15	5.93148e-15
		4.13	-3.11e-15	3.63e-15	-1.77961e-15	2.44472e-15
		4.15	1.36e-15	1.82e-15	2.85805e-15	2.66394e-15
		4.17	-2.63e-16	3.06e-15	4.01935e-15	4.63935e-15
		4.19	-1.55e-15	6.99e-16	-2.63204e-15	2.22158e-15
		4.21	-5.11e-15	3.02e-15	4.5669e-16	3.5956e-15
		4.23	9.93e-16	2.25e-15	-4.79603e-15	9.4003e-16
		4.25	-6.03e-15	3.39e-15	1.5655e-16	4.01505e-15
		4.27	-3.83e-15	3.53e-15	2.36879e-15	2.27348e-15
		4.29	-2.61e-15	1.1e-15	-5.4166e-15	3.04707e-15
		4.31	-6.66e-15	4.92e-15	3.63449e-15	3.03645e-15
		4.33	1.43e-15	3.11e-15	1.9144e-15	5.40053e-15
		4.35	2.28e-15	2.7e-15	2.68288e-15	4.16793e-15
		4.37	-2.91e-15	2.43e-15	3.16984e-16	5.49082e-15
		4.39	-3.88e-15	3.02e-15	-1.02959e-15	3.77087e-15
		4.41	-2.77e-15	1.26e-15	7.04703e-16	3.99614e-15
		4.43	9.63e-16	4.13e-15	2.73454e-15	3.67117e-15
		4.45	7.65e-16	4.13e-15	2.03745e-15	2.34373e-15
		4.47	3.32e-15	2.21e-15	3.64704e-15	2.67071e-15
		4.49	2.88e-15	4.34e-15	8.33417e-15	2.60038e-15
		4.51	1.73e-15	4.44e-15	9.16437e-15	2.69483e-15
		4.53	3.92e-15	5.54e-15	1.77515e-15	1.66398e-15
		4.55	-2.83e-15	3.28e-15	1.16333e-14	4.8038e-15
		4.57	8.86e-16	2.13e-15	4.12786e-15	1.1262e-15
		4.59	2.64e-15	5.27e-15	3.00086e-15	1.60344e-15
		4.61	-9.24e-16	1.6e-15	4.45584e-15	2.57684e-15
		4.63	-4.75e-15	3.17e-15	3.73135e-15	4.42228e-15
		4.65	-6.49e-15	5.24e-15	4.07977e-15	4.60315e-15
		4.67	-8.89e-16	1.77e-15	2.49636e-15	1.49777e-15
		4.69	-1.22e-15	6.66e-15	9.10885e-16	4.09556e-15
		4.71	-1.99e-15	3.87e-15	1.69987e-15	3.96302e-15
		4.73	-5.01e-15	2.01e-15	2.03704e-15	6.14699e-15
		4.75	4.51e-15	4.73e-15	2.58759e-15	4.52165e-15
		4.77	6.51e-16	1.64e-15	1.89335e-15	4.86847e-15
		4.79	-2.08e-15	2.55e-15	6.2596e-15	3.62483e-15
		4.81	-4.68e-15	1.86e-15	6.15367e-15	3.88539e-15
		4.83	-5.77e-15	2.37e-15	2.68907e-15	1.6762e-15
		4.85	7.26e-17	2.87e-15	7.28668e-15	4.44888e-15
		4.87	-2.89e-15	1.94e-15	-2.43904e-15	4.6652e-15
		4.89	-5.37e-15	5.06e-15	2.56059e-15	4.80897e-15
		4.91	3.34e-15	6.77e-15	2.38572e-15	5.71493e-15
		4.93	-1.67e-16	4.03e-15	9.97544e-16	1.53515e-15
		4.95	3.2e-15	4.38e-15	-8.71525e-16	7.66054e-15
		4.97	-1.88e-15	6.6e-15	8.0519e-16	2.02949e-15
		4.99	-2.33e-15	4.17e-15	9.95221e-16	3.35709e-15
		5.01
		5.03
		5.05
		5.07
		5.09
		5.11
		5.13
		5.15
		5.17
		5.19
		5.21
		5.23
		5.25
		5.27
		5.29
		5.31
		5.33
		5.35
		5.37
		5.39
		5.41
		5.43
		5.45	3.09e-13	3.19e-14	2.6531e-13	1.70658e-14
		5.47	3.11e-13	2.87e-14	2.60704e-13	1.7764e-14
		5.49	3.06e-13	3.01e-14	2.59725e-13	1.74354e-14
		5.51	3.08e-13	2.32e-14	2.62995e-13	1.5966e-14
		5.53	3.02e-13	3e-14	2.58955e-13	1.97713e-14
		5.55	3.06e-13	2.65e-14	2.61144e-13	1.83456e-14
		5.57	2.97e-13	2.86e-14	2.62445e-13	2.06741e-14
		5.59	3.02e-13	2.79e-14	2.59323e-13	2.08063e-14
		5.61	2.96e-13	2.85e-14	2.63228e-13	1.72761e-14
		5.63	2.97e-13	2.86e-14	2.52135e-13	1.94727e-14
		5.65	3.02e-13	2.46e-14	2.57424e-13	1.58378e-14
		5.67	2.98e-13	2.85e-14	2.6091e-13	1.93716e-14
		5.69	3.01e-13	2.63e-14	2.6183e-13	1.82131e-14
		5.71	2.98e-13	2.52e-14	2.58515e-13	1.90923e-14
		5.73	2.97e-13	2.8e-14	2.54419e-13	1.59145e-14
		5.75	2.96e-13	2.71e-14	2.57362e-13	1.77384e-14
		5.77	2.96e-13	2.71e-14	2.57015e-13	1.77832e-14
		5.79	2.95e-13	2.67e-14	2.54467e-13	1.78412e-14
		5.81	2.95e-13	2.84e-14	2.54764e-13	1.77336e-14
		5.83	3.03e-13	2.32e-14	2.59984e-13	1.95841e-14
		5.85	2.97e-13	2.54e-14	2.56441e-13	1.80995e-14
		5.87	3.03e-13	2.39e-14	2.5791e-13	1.82806e-14
		5.89	2.89e-13	2.92e-14	2.51774e-13	1.70403e-14
		5.91	2.94e-13	2.63e-14	2.54446e-13	1.7204e-14
		5.93	2.95e-13	2.32e-14	2.61563e-13	1.62726e-14
		5.95	2.96e-13	2.34e-14	2.52557e-13	1.80878e-14
		5.97	2.95e-13	2.46e-14	2.45032e-13	1.72124e-14
		5.99	2.99e-13	2.48e-14	2.52498e-13	1.6954e-14
		6.01	2.9e-13	2.55e-14	2.49699e-13	1.66109e-14
		6.03	2.87e-13	2.4e-14	2.48505e-13	1.6561e-14
		6.05	2.84e-13	2.65e-14	2.56121e-13	1.61296e-14
		6.07	2.9e-13	2.43e-14	2.51296e-13	1.6138e-14
		6.09	2.91e-13	2.55e-14	2.52035e-13	1.69894e-14
		6.11	2.83e-13	2.43e-14	2.48568e-13	1.6397e-14
		6.13	2.84e-13	2.49e-14	2.52318e-13	1.75384e-14
		6.15	2.89e-13	2.52e-14	2.49199e-13	1.75898e-14
		6.17	2.85e-13	2.59e-14	2.49576e-13	1.60647e-14
		6.19	2.82e-13	2.11e-14	2.48739e-13	1.84057e-14
		6.21	2.86e-13	2.43e-14	2.48745e-13	1.6997e-14
		6.23	2.82e-13	2.48e-14	2.49399e-13	1.56858e-14
		6.25	2.88e-13	2.34e-14	2.4744e-13	1.48166e-14
		6.27	2.87e-13	2.42e-14	2.47803e-13	1.86157e-14
		6.29	2.85e-13	2.29e-14	2.51026e-13	1.72959e-14
		6.31	2.8e-13	2.33e-14	2.46968e-13	1.79533e-14
		6.33	2.84e-13	2.53e-14	2.48493e-13	1.72913e-14
		6.35	2.83e-13	2.41e-14	2.46449e-13	1.70155e-14
		6.37	2.82e-13	2.39e-14	2.54032e-13	1.44165e-14
		6.39	2.78e-13	2.63e-14	2.45429e-13	1.83844e-14
		6.41	2.77e-13	2.09e-14	2.47967e-13	1.81277e-14
		6.43	2.81e-13	2.58e-14	2.47851e-13	1.78233e-14
		6.45	2.8e-13	2.69e-14	2.52174e-13	1.86373e-14
		6.47	2.84e-13	2.43e-14	2.4953e-13	1.74565e-14
		6.49	2.83e-13	2.38e-14	2.53257e-13	1.79754e-14
		6.51	2.78e-13	2.47e-14	2.4619e-13	1.93977e-14
		6.53	2.78e-13	2.18e-14	2.47672e-13	1.76848e-14
		6.55	2.77e-13	2.69e-14	2.48301e-13	2.09411e-14
		6.57	2.77e-13	2.46e-14	2.48824e-13	1.84109e-14
		6.59	2.74e-13	2.37e-14	2.47873e-13	1.98431e-14
		6.61	2.78e-13	2e-14	2.46739e-13	2.01885e-14
		6.63	2.7e-13	2.57e-14	2.48033e-13	1.98854e-14
		6.65	2.72e-13	2.26e-14	2.49343e-13	2.04838e-14
		6.67	2.77e-13	2.17e-14	2.46641e-13	2.14101e-14
		6.69	2.74e-13	2.08e-14	2.48181e-13	2.12621e-14
		6.71	2.7e-13	2.12e-14	2.43796e-13	2.15409e-14
		6.73	2.76e-13	1.89e-14	2.42415e-13	2.25962e-14
		6.75	2.69e-13	2.34e-14	2.43222e-13	1.92093e-14
		6.77	2.69e-13	2.1e-14	2.50365e-13	1.98031e-14
		6.79	2.68e-13	1.98e-14	2.47533e-13	2.03054e-14
		6.81	2.72e-13	2.07e-14	2.49783e-13	2.29021e-14
		6.83	2.71e-13	1.97e-14	2.41424e-13	2.15031e-14
		6.85	2.74e-13	2.07e-14	2.4437e-13	1.80686e-14
		6.87	2.69e-13	2.07e-14	2.47472e-13	2.03131e-14
		6.89	2.67e-13	2.12e-14	2.45e-13	2.0373e-14
		6.91	2.72e-13	2.36e-14	2.47589e-13	2.10758e-14
		6.93	2.61e-13	2.12e-14	2.43099e-13	2.10639e-14
		6.95	2.56e-13	2.44e-14	2.46271e-13	2.13124e-14
		6.97	2.63e-13	2.1e-14	2.4669e-13	2.07053e-14
		6.99	2.69e-13	1.89e-14	2.47309e-13	1.80057e-14
		7.01	2.65e-13	1.89e-14	2.41631e-13	2.19813e-14
		7.03	2.63e-13	2.08e-14	2.45806e-13	1.93195e-14
		7.05	2.65e-13	2.41e-14	2.43074e-13	2.17601e-14
		7.07	2.65e-13	2.33e-14	2.50495e-13	2.00453e-14
		7.09	2.58e-13	2.1e-14	2.44264e-13	2.27777e-14
		7.11	2.57e-13	2.21e-14	2.47333e-13	2.1382e-14
		7.13	2.65e-13	2.25e-14	2.46331e-13	2.02554e-14
		7.15	2.59e-13	2.06e-14	2.46888e-13	1.75725e-14
		7.17	2.55e-13	2.08e-14	2.46233e-13	2.11467e-14
		7.19	2.59e-13	2.06e-14	2.41596e-13	1.97508e-14
		7.21	2.59e-13	2.15e-14	2.45757e-13	2.12361e-14
		7.23	2.61e-13	2.01e-14	2.42167e-13	2.36395e-14
		7.25	2.59e-13	1.94e-14	2.45081e-13	2.14623e-14
		7.27	2.61e-13	1.84e-14	2.43173e-13	2.02133e-14
		7.29	2.51e-13	2.03e-14	2.39092e-13	2.04624e-14
		7.31	2.53e-13	2.34e-14	2.44455e-13	2.12522e-14
		7.33	2.53e-13	2.15e-14	2.44297e-13	1.97331e-14
		7.35	2.59e-13	2.04e-14	2.40682e-13	1.87786e-14
		7.37	2.53e-13	1.82e-14	2.44896e-13	2.08486e-14
		7.39	2.51e-13	2.19e-14	2.47787e-13	1.99068e-14
		7.41	2.53e-13	1.85e-14	2.40009e-13	2.1689e-14
		7.43	2.51e-13	2.01e-14	2.46708e-13	1.83757e-14
		7.45	2.49e-13	2.15e-14	2.43798e-13	2.06801e-14
		7.47	2.48e-13	2.26e-14	2.40111e-13	2.12952e-14
		7.49	2.47e-13	1.88e-14	2.47918e-13	1.97042e-14
		7.51	2.49e-13	1.78e-14	2.49221e-13	1.9921e-14
		7.53	2.48e-13	2e-14	2.42527e-13	1.91838e-14
		7.55	2.48e-13	1.87e-14	2.42811e-13	2.04278e-14
		7.57	2.46e-13	1.81e-14	2.38032e-13	2.07063e-14
		7.59	2.48e-13	1.76e-14	2.38187e-13	1.93794e-14
		7.61	2.4e-13	2.01e-14	2.38891e-13	2.2469e-14
		7.63	2.36e-13	1.99e-14	2.40885e-13	2.30619e-14
		7.65	2.43e-13	1.83e-14	2.46298e-13	2.06565e-14
		7.67	2.42e-13	1.83e-14	2.43945e-13	2.16615e-14
		7.69	2.45e-13	1.68e-14	2.41577e-13	2.24258e-14
		7.71	2.41e-13	1.78e-14	2.3737e-13	2.12094e-14
		7.73	2.42e-13	1.95e-14	2.40384e-13	2.06962e-14
		7.75	2.38e-13	1.69e-14	2.44318e-13	1.82663e-14
		7.77	2.36e-13	1.82e-14	2.42365e-13	2.10819e-14
		7.79	2.44e-13	1.36e-14	2.42106e-13	1.90953e-14
		7.81	2.48e-13	1.34e-14	2.32912e-13	2.10098e-14
		7.83	2.47e-13	1.59e-14	2.40259e-13	1.88054e-14
		7.85	2.45e-13	1.39e-14	2.37168e-13	1.78731e-14
		7.87	2.39e-13	1.51e-14	2.38972e-13	1.88092e-14
		7.89	2.38e-13	1.07e-14	2.36041e-13	2.00593e-14
		7.91	2.41e-13	1.29e-14	2.43683e-13	1.78301e-14
		7.93	2.44e-13	1.19e-14	2.39859e-13	1.97968e-14
		7.95	2.39e-13	1.41e-14	2.38071e-13	1.90741e-14
		7.97	2.43e-13	1.14e-14	2.42122e-13	1.97371e-14
		7.99	2.41e-13	1.25e-14	2.41302e-13	2.12944e-14
		8.01	2.38e-13	1.33e-14	2.42898e-13	2.24702e-14
		8.03	2.4e-13	1.22e-14	2.44349e-13	2.02669e-14
		8.05	2.38e-13	1.21e-14	2.44408e-13	2.19301e-14
		8.07	2.38e-13	1.43e-14	2.41026e-13	1.86566e-14
		8.09	2.37e-13	1.62e-14	2.39105e-13	2.21411e-14
		8.11	2.37e-13	1.22e-14	2.45639e-13	1.83634e-14
		8.13	2.34e-13	1.33e-14	2.41376e-13	2.27479e-14
		8.15	2.33e-13	1.19e-14	2.42561e-13	2.06518e-14
		8.17	2.33e-13	1.15e-14	2.46455e-13	1.99136e-14
		8.19	2.29e-13	1.5e-14	2.36015e-13	2.1436e-14
		8.21	2.34e-13	1.34e-14	2.41174e-13	2.16646e-14
		8.23	2.35e-13	1.15e-14	2.37882e-13	2.22935e-14
		8.25	2.4e-13	1.15e-14	2.43477e-13	2.08693e-14
		8.27	2.29e-13	1.37e-14	2.42979e-13	2.19521e-14
		8.29	2.34e-13	1.32e-14	2.41457e-13	2.17431e-14
		8.31	2.32e-13	1.29e-14	2.38156e-13	2.42176e-14
		8.33	2.32e-13	1.23e-14	2.44324e-13	2.11789e-14
		8.35	2.3e-13	1.5e-14	2.4073e-13	2.06489e-14
		8.37	2.25e-13	1.48e-14	2.37532e-13	2.18261e-14
		8.39	2.29e-13	1.28e-14	2.46462e-13	2.02115e-14
		8.41	2.3e-13	1.52e-14	2.42437e-13	1.93943e-14
		8.43	2.24e-13	1.53e-14	2.42614e-13	2.11402e-14
		8.45	2.22e-13	1.54e-14	2.41853e-13	2.17959e-14
		8.47	2.29e-13	1.06e-14	2.44046e-13	2.24815e-14
		8.49	2.23e-13	1.64e-14	2.4618e-13	2.17568e-14
		8.51	2.18e-13	1.63e-14	2.43342e-13	2.21836e-14
		8.53	2.13e-13	1.63e-14	2.36732e-13	2.15501e-14
		8.55	2.13e-13	1.72e-14	2.36355e-13	2.27151e-14
		8.57	2.2e-13	1.36e-14	2.37342e-13	2.27632e-14
		8.59	2.16e-13	1.31e-14	2.41135e-13	2.34447e-14
		8.61	2.19e-13	1.44e-14	2.40028e-13	2.23262e-14
		8.63	2.16e-13	1.45e-14	2.43698e-13	2.23043e-14
		8.65	2.15e-13	1.65e-14	2.39066e-13	2.44187e-14
		8.67	2.17e-13	1.34e-14	2.3754e-13	2.33282e-14
		8.69	2.15e-13	1.68e-14	2.41933e-13	2.06999e-14
		8.71	2.05e-13	1.77e-14	2.36735e-13	2.09295e-14
		8.73	2.16e-13	1.17e-14	2.43118e-13	2.10293e-14
		8.75	2.14e-13	1.32e-14	2.38147e-13	2.19277e-14
		8.77	2.09e-13	1.28e-14	2.43529e-13	2.06149e-14
		8.79	2.09e-13	1.3e-14	2.39719e-13	2.09162e-14
		8.81	2.14e-13	1.01e-14	2.44778e-13	2.25968e-14
		8.83	2.11e-13	1.28e-14	2.45015e-13	2.2264e-14
		8.85	2.1e-13	1.32e-14	2.40357e-13	2.22601e-14
		8.87	2.08e-13	1.24e-14	2.40936e-13	2.12089e-14
		8.89	2.11e-13	1.3e-14	2.44288e-13	2.22535e-14
		8.91	2.14e-13	1.32e-14	2.41564e-13	2.3978e-14
		8.93	2.12e-13	1.37e-14	2.46167e-13	2.16108e-14
		8.95	2.09e-13	1.3e-14	2.43725e-13	2.36426e-14
		8.97	2.1e-13	1.37e-14	2.41719e-13	2.1737e-14
		8.99	1.97e-13	1.54e-14	2.37436e-13	2.2676e-14
		9.01	1.99e-13	1.48e-14	2.40575e-13	2.26658e-14
		9.03	2.03e-13	1.24e-14	2.41952e-13	2.14709e-14
		9.05	2.03e-13	1.4e-14	2.41782e-13	2.08284e-14
		9.07	2.03e-13	1.2e-14	2.42368e-13	2.22765e-14
		9.09	1.95e-13	1.21e-14	2.44101e-13	2.25424e-14
		9.11	1.94e-13	1.18e-14	2.38498e-13	2.1884e-14
		9.13	2.02e-13	1.18e-14	2.37829e-13	2.27912e-14
		9.15	1.98e-13	1.28e-14	2.44974e-13	2.23417e-14
		9.17	1.95e-13	1.32e-14	2.42238e-13	2.15652e-14
		9.19	1.97e-13	1.33e-14	2.42808e-13	2.49247e-14
		9.21	1.92e-13	1.41e-14	2.43797e-13	2.2081e-14
		9.23	2.04e-13	9.15e-15	2.43928e-13	2.22119e-14
		9.25	1.91e-13	1.23e-14	2.39975e-13	2.19177e-14
		9.27	1.97e-13	1.42e-14	2.39008e-13	2.29172e-14
		9.29	1.95e-13	1.33e-14	2.36425e-13	2.7028e-14
		9.31	1.9e-13	1.57e-14	2.38167e-13	2.54752e-14
		9.33	1.98e-13	1.11e-14	2.38341e-13	2.36638e-14
		9.35	1.95e-13	1.32e-14	2.40563e-13	2.29975e-14
		9.37	1.89e-13	1.32e-14	2.37632e-13	2.35788e-14
		9.39	1.92e-13	1.3e-14	2.34708e-13	2.34595e-14
		9.41	1.9e-13	1.31e-14	2.36323e-13	2.43642e-14
		9.43	1.88e-13	1.33e-14	2.38067e-13	2.33893e-14
		9.45	1.87e-13	1.61e-14	2.36946e-13	2.20846e-14
		9.47	1.88e-13	1.25e-14	2.36621e-13	2.29202e-14
		9.49	1.93e-13	1.35e-14	2.34712e-13	2.1494e-14
		9.51	1.91e-13	1.52e-14	2.39677e-13	2.35998e-14
		9.53	1.88e-13	1.45e-14	2.40591e-13	2.13706e-14
		9.55	1.79e-13	1.52e-14	2.31547e-13	2.30309e-14
		9.57	1.8e-13	1.32e-14	2.33839e-13	2.36732e-14
		9.59	1.87e-13	1.48e-14	2.37225e-13	2.42453e-14
		9.61	1.85e-13	1.46e-14	2.39157e-13	2.46323e-14
		9.63	1.86e-13	1.44e-14	2.35456e-13	2.67583e-14
		9.65	1.81e-13	1.58e-14	2.3614e-13	2.47529e-14
		9.67	1.82e-13	1.27e-14	2.42513e-13	2.33047e-14
		9.69	1.81e-13	1.58e-14	2.39044e-13	2.53109e-14
		9.71	1.78e-13	1.41e-14	2.40563e-13	2.48115e-14
		9.73	1.77e-13	1.31e-14	2.42499e-13	2.12829e-14
		9.75	1.78e-13	1.39e-14	2.36599e-13	2.32015e-14
		9.77	1.83e-13	1.37e-14	2.40508e-13	2.39305e-14
		9.79	1.8e-13	1.23e-14	2.41217e-13	2.40134e-14
		9.81	1.76e-13	1.32e-14	2.41786e-13	2.43516e-14
		9.83	1.79e-13	1.39e-14	2.42955e-13	2.39615e-14
		9.85	1.76e-13	1.27e-14	2.36937e-13	2.20426e-14
		9.87	1.78e-13	1.15e-14	2.39109e-13	2.34251e-14
		9.89	1.74e-13	1.27e-14	2.37806e-13	2.49859e-14
		9.91	1.77e-13	1.21e-14	2.35804e-13	2.36591e-14
		9.93	1.79e-13	1.15e-14	2.41799e-13	2.42873e-14
		9.95	1.72e-13	1.42e-14	2.40078e-13	2.57906e-14
		9.97	1.8e-13	1.39e-14	2.37292e-13	2.42548e-14
		9.99	1.73e-13	1.54e-14	2.47929e-13	2.37082e-14
		10.01	1.81e-13	1.27e-14	2.40087e-13	2.4399e-14
		10.03	1.74e-13	1.58e-14	2.31658e-13	2.60094e-14
		10.05	1.81e-13	1.21e-14	2.38527e-13	2.60885e-14
		10.07	1.74e-13	1.47e-14	2.41731e-13	2.53257e-14
		10.09	1.76e-13	1.27e-14	2.44738e-13	2.44942e-14
		10.11	1.69e-13	1.51e-14	2.41582e-13	2.45185e-14
		10.13	1.77e-13	1.53e-14	2.46553e-13	2.35083e-14
		10.15	1.69e-13	1.44e-14	2.41976e-13	2.36413e-14
		10.17	1.68e-13	1.4e-14	2.36521e-13	2.64827e-14
		10.19	1.74e-13	1.04e-14	2.43023e-13	2.46634e-14
		10.21	1.75e-13	1.22e-14	2.384e-13	2.34156e-14
		10.23	1.72e-13	1.53e-14	2.39071e-13	2.35382e-14
		10.25	1.65e-13	1.69e-14	2.42003e-13	2.65133e-14
		10.27	1.77e-13	1.35e-14	2.37034e-13	2.46672e-14
		10.29	1.68e-13	1.3e-14	2.38109e-13	2.39669e-14
		10.31	1.71e-13	1.28e-14	2.41027e-13	2.50019e-14
		10.33	1.7e-13	1.38e-14	2.3908e-13	2.55203e-14
		10.35	1.68e-13	1.46e-14	2.40907e-13	2.29011e-14
		10.37	1.7e-13	1.33e-14	2.39772e-13	2.34945e-14
		10.39	1.66e-13	1.12e-14	2.39366e-13	2.63261e-14
		10.41	1.74e-13	1.12e-14	2.3931e-13	2.59058e-14
		10.43	1.69e-13	1.2e-14	2.39421e-13	2.40855e-14
		10.45	1.65e-13	1.48e-14	2.3851e-13	2.49269e-14
		10.47	1.67e-13	1.42e-14	2.37881e-13	2.60161e-14
		10.49	1.66e-13	1.15e-14	2.39888e-13	2.34922e-14
		10.51	1.6e-13	1.55e-14	2.4509e-13	2.31848e-14
		10.53	1.64e-13	1.22e-14	2.39531e-13	2.52003e-14
		10.55	1.64e-13	1.26e-14	2.37291e-13	2.64186e-14
		10.57	1.63e-13	1.36e-14	2.38683e-13	2.59093e-14
		10.59	1.63e-13	1.21e-14	2.36609e-13	2.25128e-14
		10.61	1.65e-13	1.35e-14	2.41803e-13	2.43909e-14
		10.63	1.57e-13	1.44e-14	2.39634e-13	2.60994e-14
		10.65	1.62e-13	1.55e-14	2.43795e-13	2.55941e-14
		10.67	1.57e-13	1.46e-14	2.44015e-13	2.4119e-14
		10.69	1.58e-13	1.5e-14	2.38507e-13	2.40693e-14
		10.71	1.6e-13	1.24e-14	2.36058e-13	2.44296e-14
		10.73	1.6e-13	1.34e-14	2.36764e-13	2.48264e-14
		10.75	1.61e-13	1.27e-14	2.41683e-13	2.3981e-14
		10.77	1.64e-13	1.19e-14	2.38694e-13	2.50851e-14
		10.79	1.62e-13	1.04e-14	2.38397e-13	2.56779e-14
		10.81	1.73e-13	1.14e-14	2.39519e-13	2.39508e-14
		10.83	1.58e-13	1.16e-14	2.30389e-13	2.50989e-14
		10.85	1.55e-13	1.17e-14	2.36234e-13	2.50194e-14
		10.87	1.65e-13	1.3e-14	2.30769e-13	2.65836e-14
		10.89	1.57e-13	1.28e-14	2.36127e-13	2.36568e-14
		10.91	1.58e-13	1.53e-14	2.36594e-13	2.67174e-14
		10.93	1.52e-13	1.21e-14	2.26691e-13	2.54586e-14
		10.95	1.54e-13	1.24e-14	2.31032e-13	2.747e-14
		10.97	1.55e-13	1.26e-14	2.37648e-13	2.39672e-14
		10.99	1.56e-13	1.44e-14	2.34451e-13	2.49625e-14
		11.01	1.6e-13	1.36e-14	2.30087e-13	2.21764e-14
		11.03	1.57e-13	1.4e-14	2.3128e-13	2.26196e-14
		11.05	1.57e-13	1.21e-14	2.30221e-13	2.54213e-14
		11.07	1.53e-13	1.16e-14	2.30527e-13	2.25799e-14
		11.09	1.49e-13	1.37e-14	2.24679e-13	2.47452e-14
		11.11	1.57e-13	1.31e-14	2.25436e-13	2.40373e-14
		11.13	1.53e-13	1.26e-14	2.28115e-13	2.37031e-14
		11.15	1.54e-13	1.26e-14	2.30114e-13	2.31311e-14
		11.17	1.44e-13	1.28e-14	2.29659e-13	2.19498e-14
		11.19	1.51e-13	7.93e-15	2.28702e-13	2.39089e-14
		11.21	1.46e-13	1.32e-14	2.27459e-13	2.34347e-14
		11.23	1.52e-13	1.2e-14	2.2458e-13	2.37819e-14
		11.25	1.52e-13	1.19e-14	2.21655e-13	2.25662e-14
		11.27	1.42e-13	1.14e-14	2.24877e-13	2.30591e-14
		11.29	1.42e-13	1.16e-14	2.24358e-13	2.29481e-14
		11.31	1.48e-13	1.17e-14	2.22723e-13	2.21447e-14
		11.33	1.45e-13	1.08e-14	2.27415e-13	2.11354e-14
		11.35	1.46e-13	1.16e-14	2.27887e-13	2.03802e-14
		11.37	1.44e-13	1.07e-14	2.21514e-13	2.27403e-14
		11.39	1.47e-13	1.09e-14	2.26584e-13	1.95131e-14
		11.41	1.43e-13	1.21e-14	2.33327e-13	2.12065e-14
		11.43	1.45e-13	1.1e-14	2.30785e-13	2.0843e-14
		11.45	1.44e-13	1.04e-14	2.28138e-13	1.85589e-14
		11.47	1.42e-13	1.24e-14	2.27584e-13	1.64492e-14
		11.49	1.38e-13	1.18e-14	2.29844e-13	1.94775e-14
		11.51	1.41e-13	1.11e-14	2.32044e-13	1.8802e-14
		11.53	1.38e-13	1.25e-14	2.23958e-13	2.03155e-14
		11.55	1.44e-13	9.78e-15	2.24886e-13	1.80123e-14
		11.57	1.4e-13	1.32e-14	2.24946e-13	2.15445e-14
		11.59	1.33e-13	1.15e-14	2.28839e-13	1.82909e-14
		11.61	1.35e-13	1.06e-14	2.28867e-13	1.83042e-14
		11.63	1.36e-13	1.25e-14	2.28056e-13	2.00932e-14
		11.65	1.37e-13	1.3e-14	2.28403e-13	1.82335e-14
		11.67	1.41e-13	1.2e-14	2.28404e-13	1.87299e-14
		11.69	1.34e-13	1.39e-14	2.32429e-13	1.76918e-14
		11.71	1.37e-13	1.25e-14	2.31342e-13	1.96042e-14
		11.73	1.37e-13	1.39e-14	2.21442e-13	2.06751e-14
		11.75	1.4e-13	1.04e-14	2.26476e-13	2.08419e-14
		11.77	1.4e-13	1.23e-14	2.26467e-13	1.95207e-14
		11.79	1.42e-13	1.43e-14	2.27638e-13	2.12396e-14
		11.81	1.34e-13	1.33e-14	2.26694e-13	1.91403e-14
		11.83	1.36e-13	1.04e-14	2.35801e-13	1.76557e-14
		11.85	1.35e-13	1.39e-14	2.28395e-13	2.14426e-14
		11.87	1.37e-13	1.25e-14	2.27539e-13	1.89455e-14
		11.89	1.36e-13	1.08e-14	2.32837e-13	1.92184e-14
		11.91	1.32e-13	1.41e-14	2.3366e-13	1.94213e-14
		11.93	1.39e-13	1.09e-14	2.28116e-13	2.03285e-14
		11.95	1.36e-13	1.37e-14	2.29217e-13	2.17196e-14
		11.97	1.35e-13	1.33e-14	2.32625e-13	2.0865e-14
		11.99	1.29e-13	1.05e-14	2.33667e-13	2.04302e-14
		12.01	1.37e-13	1.14e-14	2.31966e-13	1.95275e-14
		12.03	1.33e-13	1.17e-14	2.30153e-13	2.24577e-14
		12.05	1.36e-13	1.22e-14	2.28247e-13	2.18886e-14
		12.07	1.33e-13	1.18e-14	2.36923e-13	2.13944e-14
		12.09	1.31e-13	1.11e-14	2.35173e-13	2.05023e-14
		12.11	1.3e-13	9.72e-15	2.37805e-13	1.98447e-14
		12.13	1.35e-13	1.16e-14	2.36631e-13	2.00254e-14
		12.15	1.32e-13	1.03e-14	2.31011e-13	2.02442e-14
		12.17	1.33e-13	1.11e-14	2.3362e-13	2.02596e-14
		12.19	1.29e-13	1.23e-14	2.31391e-13	2.135e-14
		12.21	1.31e-13	1.23e-14	2.29677e-13	2.00805e-14
		12.23	1.22e-13	1.24e-14	2.37324e-13	2.17444e-14
		12.25	1.23e-13	1.16e-14	2.35604e-13	2.07257e-14
		12.27	1.24e-13	1.05e-14	2.32975e-13	1.95298e-14
		12.29	1.25e-13	1.19e-14	2.36175e-13	1.9776e-14
		12.31	1.28e-13	1.47e-14	2.26844e-13	2.0418e-14
		12.33	1.24e-13	9.99e-15	2.29606e-13	2.01432e-14
		12.35	1.21e-13	1.06e-14	2.24412e-13	1.80195e-14
		12.37	1.25e-13	1.06e-14	2.32437e-13	1.909e-14
		12.39	1.25e-13	1.02e-14	2.34219e-13	1.86222e-14
		12.41	1.23e-13	1.11e-14	2.31184e-13	1.9618e-14
		12.43	1.23e-13	1.03e-14	2.30211e-13	1.89606e-14
		12.45	1.22e-13	1.42e-14	2.30044e-13	1.95687e-14
		12.47	1.22e-13	1.27e-14	2.28794e-13	1.96349e-14
		12.49	1.26e-13	1.18e-14	2.26508e-13	1.6695e-14
		12.51	1.3e-13	1.07e-14	2.30838e-13	1.66374e-14
		12.53	1.23e-13	1.24e-14	2.3266e-13	2.04502e-14
		12.55	1.26e-13	1.11e-14	2.31194e-13	1.76454e-14
		12.57	1.23e-13	9.92e-15	2.30989e-13	1.74977e-14
		12.59	1.19e-13	9.86e-15	2.26953e-13	1.63523e-14
		12.61	1.24e-13	1.13e-14	2.28804e-13	1.61934e-14
		12.63	1.18e-13	1.13e-14	2.26609e-13	1.89234e-14
		12.65	1.24e-13	1.12e-14	2.27003e-13	1.72336e-14
		12.67	1.2e-13	8.18e-15	2.26078e-13	1.5064e-14
		12.69	1.25e-13	1.11e-14	2.19832e-13	1.55854e-14
		12.71	1.16e-13	1.12e-14	2.2921e-13	1.57233e-14
		12.73	1.19e-13	1.04e-14	2.23867e-13	1.51931e-14
		12.75	1.15e-13	9.29e-15	2.35634e-13	1.54805e-14
		12.77	1.21e-13	1.24e-14	2.25883e-13	1.59223e-14
		12.79	1.2e-13	1.05e-14	2.26797e-13	1.72058e-14
		12.81	1.14e-13	1.23e-14	2.27098e-13	1.40439e-14
		12.83	1.19e-13	1.06e-14	2.28804e-13	1.39731e-14
		12.85	1.18e-13	1.04e-14	2.29418e-13	1.45301e-14
		12.87	1.19e-13	9.17e-15	2.26782e-13	1.55411e-14
		12.89	1.2e-13	1.1e-14	2.20519e-13	1.56835e-14
		12.91	1.18e-13	9.9e-15	2.23949e-13	1.45191e-14
		12.93	1.21e-13	1.2e-14	2.29426e-13	1.52284e-14
		12.95	1.21e-13	1.22e-14	2.23013e-13	1.70407e-14
		12.97	1.15e-13	7.97e-15	2.23303e-13	1.57731e-14
		12.99	1.18e-13	9.48e-15	2.25793e-13	1.44525e-14
		13.01	1.19e-13	1.08e-14	2.21238e-13	1.47176e-14
		13.03	1.16e-13	1.15e-14	2.2087e-13	1.72656e-14
		13.05	1.21e-13	1.05e-14	2.22888e-13	1.63358e-14
		13.07	1.13e-13	1.19e-14	2.25079e-13	1.59058e-14
		13.09	1.17e-13	1.15e-14	2.30518e-13	1.6596e-14
		13.11	1.18e-13	1.14e-14	2.27155e-13	1.82316e-14
		13.13	1.22e-13	1.24e-14	2.30706e-13	1.76499e-14
		13.15	1.18e-13	1.07e-14	2.30503e-13	1.80257e-14
		13.17	1.14e-13	1.16e-14	2.23601e-13	1.52423e-14
		13.19	1.16e-13	9.47e-15	2.33144e-13	1.76451e-14
		13.21	1.18e-13	1.5e-14	2.29352e-13	1.8463e-14
		13.23	1.18e-13	1.59e-14	2.30456e-13	1.84297e-14
		13.25	1.19e-13	1.09e-14	2.36097e-13	1.78244e-14
		13.27	1.09e-13	1.38e-14	2.31e-13	1.85733e-14
		13.29	1.2e-13	1.17e-14	2.26639e-13	1.97283e-14
		13.31	1.14e-13	1.38e-14	2.27805e-13	1.88222e-14
		13.33	1.08e-13	1.17e-14	2.29111e-13	1.90711e-14
		13.35	1.17e-13	1.23e-14	2.26225e-13	1.93099e-14
		13.37	1.13e-13	1.33e-14	2.29981e-13	1.86382e-14
		13.39	1.18e-13	1.46e-14	2.32792e-13	1.62852e-14
		13.41	1.15e-13	1.19e-14	2.25563e-13	1.81009e-14
		13.43	1.15e-13	1.13e-14	2.25229e-13	1.84928e-14
		13.45	1.13e-13	1.2e-14	2.25089e-13	2.02396e-14
		13.47	1.11e-13	1.34e-14	2.28569e-13	1.8003e-14
		13.49	1.13e-13	9.89e-15	2.30627e-13	1.89805e-14
		13.51	1.09e-13	1.24e-14	2.30095e-13	1.87422e-14
		13.53	1.13e-13	1.34e-14	2.26355e-13	1.88005e-14
		13.55	1.12e-13	1.45e-14	2.27119e-13	2.0296e-14
		13.57	1.12e-13	1.6e-14	2.32271e-13	2.06851e-14
		13.59	1.14e-13	1.11e-14	2.22542e-13	1.89361e-14
		13.61	1.16e-13	1.25e-14	2.24468e-13	2.04444e-14
		13.63	1.12e-13	1.26e-14	2.24194e-13	2.13317e-14
		13.65	1.08e-13	1.13e-14	2.25667e-13	2.21638e-14
		13.67	1.11e-13	1.17e-14	2.28444e-13	2.06296e-14
		13.69	1.14e-13	1.45e-14	2.24097e-13	1.9805e-14
		13.71	1.11e-13	1.33e-14	2.28517e-13	2.06124e-14
		13.73	1.11e-13	1.29e-14	2.2977e-13	1.92429e-14
		13.75	1.11e-13	1.26e-14	2.21788e-13	2.06632e-14
		13.77	1.09e-13	1.2e-14	2.2478e-13	2.09556e-14
		13.79	1.13e-13	1.36e-14	2.26148e-13	1.92828e-14
		13.81	1.09e-13	1.34e-14	2.24963e-13	1.85432e-14
		13.83	1.16e-13	1.44e-14	2.19667e-13	1.81944e-14
		13.85	1.08e-13	1.05e-14	2.27736e-13	1.80398e-14
		13.87	1.07e-13	1.45e-14	2.25935e-13	1.81983e-14
		13.89	1.1e-13	1.27e-14	2.24771e-13	1.95913e-14
		13.91	1e-13	1.26e-14	2.28321e-13	2.04455e-14
		13.93	1.01e-13	1.17e-14	2.23609e-13	1.99341e-14
		13.95	1.1e-13	1.21e-14	2.25508e-13	1.96064e-14
		13.97	9.9e-14	9.11e-15	2.25806e-13	1.92088e-14
		13.99	1.11e-13	1.39e-14	2.25361e-13	1.81228e-14
		14.01	1.08e-13	1.08e-14	2.25322e-13	1.82542e-14
		14.03	1.01e-13	1.27e-14	2.24257e-13	1.83686e-14
		14.05	1.1e-13	1.42e-14	2.24951e-13	1.85335e-14
		14.07	1.06e-13	1.26e-14	2.24123e-13	1.81213e-14
		14.09	1.04e-13	1.15e-14	2.22676e-13	2.05549e-14
		14.11	1.06e-13	1.33e-14	2.23419e-13	1.91219e-14
		14.13	1.06e-13	1.29e-14	2.28237e-13	2.01267e-14
		14.15	1.05e-13	1.36e-14	2.26291e-13	2.18623e-14
		14.17	1.04e-13	1.31e-14	2.29207e-13	2.08249e-14
		14.19	1.13e-13	1.46e-14	2.30547e-13	1.8169e-14
		14.21	1.05e-13	1.29e-14	2.26936e-13	2.02885e-14
		14.23	1.06e-13	1.21e-14	2.28937e-13	2.25657e-14
		14.25	1.05e-13	1.19e-14	2.31032e-13	2.17387e-14
		14.27	1.04e-13	1.51e-14	2.30358e-13	1.90587e-14
		14.29	1.09e-13	1.65e-14	2.2798e-13	2.15396e-14
		14.31	1.03e-13	1.46e-14	2.28805e-13	2.14948e-14
		14.33	1.08e-13	1.44e-14	2.23823e-13	2.13551e-14
		14.35	1.05e-13	1.65e-14	2.27256e-13	2.21173e-14
		14.37	1.07e-13	1.78e-14	2.31052e-13	2.20416e-14
		14.39	9.8e-14	1.32e-14	2.27053e-13	2.19457e-14
		14.41	1.02e-13	1.35e-14	2.2665e-13	2.28367e-14
		14.43	1.02e-13	1.63e-14	2.2539e-13	1.95398e-14
		14.45	9.61e-14	1.38e-14	2.26569e-13	1.97961e-14
		14.47	1.03e-13	1.75e-14	2.27844e-13	1.99143e-14
		14.49	1.01e-13	1.29e-14	2.26509e-13	2.22604e-14
		14.51	1.02e-13	1.2e-14	2.2431e-13	2.03129e-14
		14.53	9.83e-14	1.31e-14	2.28216e-13	2.05359e-14
		14.55	1.07e-13	1.38e-14	2.25475e-13	1.9028e-14
		14.57	9.23e-14	1.42e-14	2.23262e-13	2.15694e-14
		14.59	9.23e-14	1.49e-14	2.2909e-13	2.051e-14
		14.61	9.78e-14	1.31e-14	2.22196e-13	2.02234e-14
		14.63	1.03e-13	1.26e-14	2.2677e-13	1.98205e-14
		14.65	9.22e-14	1.37e-14	2.22425e-13	2.04927e-14
		14.67	9.5e-14	1.17e-14	2.24673e-13	2.01508e-14
		14.69	9.52e-14	1.24e-14	2.22864e-13	2.00007e-14
		14.71	9.41e-14	1.37e-14	2.27639e-13	2.03214e-14
		14.73	8.94e-14	1.05e-14	2.24681e-13	2.10131e-14
		14.75	9.37e-14	1.57e-14	2.2333e-13	2.10605e-14
		14.77	9.05e-14	1.54e-14	2.28113e-13	2.30152e-14
		14.79	9.8e-14	1.4e-14	2.19528e-13	1.88695e-14
		14.81	9.53e-14	1.47e-14	2.2355e-13	1.97159e-14
		14.83	1e-13	1.51e-14	2.23158e-13	2.04978e-14
		14.85	8.75e-14	1.28e-14	2.20045e-13	2.23553e-14
		14.87	9.94e-14	1.59e-14	2.27443e-13	1.95262e-14
		14.89	9.32e-14	1.42e-14	2.27358e-13	2.27057e-14
		14.91	9.32e-14	1.68e-14	2.27685e-13	2.06353e-14
		14.93	9.44e-14	1.41e-14	2.25944e-13	2.41245e-14
		14.95	9.45e-14	1.49e-14	2.24382e-13	2.06544e-14
		14.97	8.91e-14	1.25e-14	2.26231e-13	2.22479e-14
		14.99	9.57e-14	1.59e-14	2.26335e-13	2.19337e-14
		15.01	9.22e-14	1.41e-14	2.25605e-13	2.04949e-14
		15.03	9.2e-14	1.56e-14	2.25519e-13	2.01033e-14
		15.05	9.38e-14	1.69e-14	2.28181e-13	2.27997e-14
		15.07	8.89e-14	1.59e-14	2.2151e-13	2.07903e-14
		15.09	8.81e-14	1.49e-14	2.28479e-13	2.43752e-14
		15.11	9.31e-14	1.24e-14	2.28655e-13	2.04589e-14
		15.13	9.37e-14	1.48e-14	2.27054e-13	2.17939e-14
		15.15	9.48e-14	1.68e-14	2.22803e-13	2.33918e-14
		15.17	8.87e-14	1.5e-14	2.24703e-13	2.14898e-14
		15.19	8.56e-14	1.53e-14	2.28913e-13	2.17581e-14
		15.21	9.2e-14	1.48e-14	2.21145e-13	2.01585e-14
		15.23	9.02e-14	1.3e-14	2.25178e-13	2.0102e-14
		15.25	9.15e-14	1.71e-14	2.33169e-13	2.03284e-14
		15.27	8.73e-14	1.37e-14	2.19719e-13	2.18771e-14
		15.29	8.74e-14	1.4e-14	2.2815e-13	1.93946e-14
		15.31	9.26e-14	1.7e-14	2.24418e-13	1.98178e-14
		15.33	8.81e-14	1.45e-14	2.22561e-13	2.11775e-14
		15.35	8.98e-14	1.58e-14	2.21295e-13	2.14123e-14
		15.37	8.37e-14	1.5e-14	2.24927e-13	1.98933e-14
		15.39	8.15e-14	1.56e-14	2.28488e-13	2.04049e-14
		15.41	8.98e-14	1.27e-14	2.20222e-13	2.13734e-14
		15.43	8.42e-14	1.37e-14	2.27523e-13	1.81853e-14
		15.45	8.52e-14	1.43e-14	2.20146e-13	2.06271e-14
		15.47	8.27e-14	1.72e-14	2.2218e-13	2.01139e-14
		15.49	8.52e-14	1.42e-14	2.21305e-13	2.17248e-14
		15.51	9.16e-14	1.57e-14	2.27057e-13	1.91282e-14
		15.53	7.87e-14	1.21e-14	2.21456e-13	2.0126e-14
		15.55	8.21e-14	1.32e-14	2.2609e-13	1.8581e-14
		15.57	9.01e-14	1.67e-14	2.2908e-13	2.00544e-14
		15.59	8.18e-14	1.33e-14	2.28329e-13	1.79698e-14
		15.61	9.09e-14	1.82e-14	2.26163e-13	1.94023e-14
		15.63	8.1e-14	1.54e-14	2.22436e-13	1.85668e-14
		15.65	7.98e-14	1.44e-14	2.2001e-13	1.89612e-14
		15.67	7.95e-14	1.47e-14	2.218e-13	1.85141e-14
		15.69	8.32e-14	1.71e-14	2.24576e-13	1.94221e-14
		15.71	7.82e-14	1.16e-14	2.22191e-13	1.84859e-14
		15.73	8.51e-14	1.53e-14	2.21357e-13	1.93983e-14
		15.75	8.29e-14	1.54e-14	2.18617e-13	2.01401e-14
		15.77	8.01e-14	1.45e-14	2.19739e-13	2.16547e-14
		15.79	7.67e-14	1.27e-14	2.20016e-13	2.04962e-14
		15.81	8.22e-14	1.66e-14	2.21494e-13	2.00403e-14
		15.83	8.4e-14	1.48e-14	2.23564e-13	2.13277e-14
		15.85	7.94e-14	1.45e-14	2.2617e-13	2.01792e-14
		15.87	8.42e-14	1.54e-14	2.21003e-13	1.91866e-14
		15.89	7.86e-14	1.37e-14	2.22417e-13	1.94901e-14
		15.91	7.64e-14	1.32e-14	2.18291e-13	1.90495e-14
		15.93	7.99e-14	1.43e-14	2.21834e-13	1.86669e-14
		15.95	8.21e-14	1.58e-14	2.22319e-13	1.79312e-14
		15.97	7.6e-14	1.44e-14	2.21165e-13	1.6902e-14
		15.99	7.9e-14	1.32e-14	2.25803e-13	1.75659e-14
		16.01	8.15e-14	1.47e-14	2.24498e-13	1.79911e-14
		16.03	7.45e-14	1.15e-14	2.23109e-13	1.8222e-14
		16.05	7.75e-14	1.39e-14	2.2032e-13	1.9352e-14
		16.07	8.15e-14	1.42e-14	2.24048e-13	1.83938e-14
		16.09	7.62e-14	1.55e-14	2.1796e-13	1.95559e-14
		16.11	8.17e-14	1.66e-14	2.22963e-13	1.90878e-14
		16.13	7.29e-14	1.34e-14	2.26039e-13	1.99262e-14
		16.15	7.26e-14	1.39e-14	2.30343e-13	2.12914e-14
		16.17	7.57e-14	1.52e-14	2.26404e-13	2.05223e-14
		16.19	7.24e-14	1.41e-14	2.26113e-13	2.06502e-14
		16.21	7.55e-14	1.45e-14	2.23307e-13	2.09444e-14
		16.23	7.53e-14	1.55e-14	2.20522e-13	1.95714e-14
		16.25	7.56e-14	1.26e-14	2.23315e-13	1.85211e-14
		16.27	7.75e-14	1.47e-14	2.20513e-13	2.00921e-14
		16.29	7.72e-14	1.43e-14	2.24053e-13	1.87512e-14
		16.31	7.4e-14	1.41e-14	2.26056e-13	2.12607e-14
		16.33	8.2e-14	1.57e-14	2.21598e-13	2.02018e-14
		16.35	7.22e-14	1.44e-14	2.27008e-13	2.03371e-14
		16.37	7.66e-14	1.36e-14	2.199e-13	2.04283e-14
		16.39	7.49e-14	1.36e-14	2.22306e-13	2.07208e-14
		16.41	8.34e-14	1.81e-14	2.22291e-13	2.05976e-14
		16.43	8.37e-14	1.46e-14	2.243e-13	2.10562e-14
		16.45	7.59e-14	1.52e-14	2.20108e-13	2.03183e-14
		16.47	7.66e-14	1.59e-14	2.23229e-13	1.83626e-14
		16.49	7.22e-14	1.38e-14	2.20187e-13	1.76429e-14
		16.51	7.45e-14	1.43e-14	2.09337e-13	1.87094e-14
		16.53	7.48e-14	1.64e-14	2.17018e-13	1.71464e-14
		16.55	7.27e-14	1.34e-14	2.20385e-13	2.00032e-14
		16.57	7.75e-14	1.74e-14	2.20641e-13	1.77971e-14
		16.59	7.87e-14	1.62e-14	2.17774e-13	2.11049e-14
		16.61	7.21e-14	1.56e-14	2.17524e-13	1.78064e-14
		16.63	8.47e-14	1.77e-14	2.16026e-13	1.88082e-14
		16.65	6.96e-14	1.49e-14	2.17933e-13	2.06101e-14
		16.67	7.99e-14	1.64e-14	2.19951e-13	1.72319e-14
		16.69	7.81e-14	1.75e-14	2.16412e-13	2.00325e-14
		16.71	8.02e-14	1.61e-14	2.13123e-13	1.94105e-14
		16.73	8.05e-14	1.64e-14	2.19925e-13	1.83234e-14
		16.75	7.45e-14	1.54e-14	2.18234e-13	1.87767e-14
		16.77	8.14e-14	1.65e-14	2.21079e-13	1.60366e-14
		16.79	7.97e-14	1.7e-14	2.16125e-13	2.00936e-14
		16.81	7.4e-14	1.57e-14	2.16111e-13	1.65882e-14
		16.83	7.52e-14	1.42e-14	2.11831e-13	1.87555e-14
		16.85	7.07e-14	1.44e-14	2.16229e-13	1.81197e-14
		16.87	8.17e-14	1.6e-14	2.18846e-13	1.80046e-14
		16.89	7.3e-14	1.49e-14	2.18207e-13	1.52973e-14
		16.91	7.22e-14	1.41e-14	2.14175e-13	1.80674e-14
		16.93	7.31e-14	1.77e-14	2.16056e-13	1.53832e-14
		16.95	7.41e-14	1.66e-14	2.15465e-13	1.49357e-14
		16.97	7.11e-14	1.52e-14	2.14605e-13	1.55169e-14
		16.99	7.28e-14	1.51e-14	2.08485e-13	1.62232e-14
		17.01	7.33e-14	1.38e-14	2.15297e-13	1.71836e-14
		17.03	7.54e-14	1.44e-14	2.09578e-13	1.71435e-14
		17.05	6.83e-14	1.59e-14	2.17745e-13	1.6408e-14
		17.07	7.18e-14	1.53e-14	2.11046e-13	1.70401e-14
		17.09	7.38e-14	1.68e-14	2.12276e-13	1.54844e-14
		17.11	7.24e-14	1.74e-14	2.14432e-13	1.62007e-14
		17.13	8.04e-14	1.75e-14	2.15743e-13	1.35364e-14
		17.15	6.43e-14	1.57e-14	2.16966e-13	1.67079e-14
		17.17	6.72e-14	1.44e-14	2.07785e-13	1.54145e-14
		17.19	7.28e-14	1.48e-14	2.09875e-13	1.45839e-14
		17.21	5.99e-14	1.21e-14	2.14062e-13	1.58325e-14
		17.23	7.2e-14	1.44e-14	2.08924e-13	1.52823e-14
		17.25	6.8e-14	1.59e-14	2.06367e-13	1.44515e-14
		17.27	6.5e-14	1.34e-14	2.08578e-13	1.45927e-14
		17.29	6.49e-14	1.39e-14	2.08879e-13	1.4435e-14
		17.31	7.02e-14	1.25e-14	2.08891e-13	1.30346e-14
		17.33	6.57e-14	1.5e-14	2.11082e-13	1.43927e-14
		17.35	6.09e-14	1.24e-14	2.06019e-13	1.75113e-14
		17.37	6.63e-14	1.6e-14	2.07861e-13	1.43398e-14
		17.39	6.38e-14	1.26e-14	2.07215e-13	1.47068e-14
		17.41	6.85e-14	1.03e-14	2.02971e-13	1.60643e-14
		17.43	6.37e-14	1.17e-14	2.01323e-13	1.37755e-14
		17.45	5.81e-14	9.71e-15	2.06376e-13	1.31078e-14
		17.47	6.75e-14	1.4e-14	2.03229e-13	1.32883e-14
		17.49	6.2e-14	1.11e-14	2.0271e-13	1.27287e-14
		17.51	7.03e-14	1.18e-14	2.03833e-13	1.40914e-14
		17.53	6.05e-14	9.43e-15	2.03023e-13	1.39948e-14
		17.55	6.64e-14	1.27e-14	2.11818e-13	1.22169e-14
		17.57	6.53e-14	1.14e-14	2.11745e-13	1.13964e-14
		17.59	6.72e-14	1.18e-14	2.07407e-13	1.29445e-14
		17.61	6.16e-14	9.31e-15	2.07203e-13	1.23671e-14
		17.63	6.9e-14	1.42e-14	2.04488e-13	1.10217e-14
		17.65	6.23e-14	1.11e-14	2.11081e-13	1.31307e-14
		17.67	5.62e-14	9.28e-15	2.03328e-13	1.2704e-14
		17.69	6.37e-14	1.09e-14	2.05957e-13	1.45999e-14
		17.71	6.48e-14	9.3e-15	2.03741e-13	1.27022e-14
		17.73	6.07e-14	1.22e-14	2.06562e-13	1.20167e-14
		17.75	6.21e-14	1.07e-14	2.0401e-13	1.37378e-14
		17.77	6.08e-14	1.07e-14	2.07867e-13	1.11756e-14
		17.79	6.51e-14	1.41e-14	2.05633e-13	1.01483e-14
		17.81	6.3e-14	1.27e-14	2.02239e-13	1.20891e-14
		17.83	6.34e-14	1.4e-14	2.08962e-13	1.06128e-14
		17.85	6.55e-14	1.25e-14	2.07305e-13	9.10441e-15
		17.87	6.27e-14	9.28e-15	2.0429e-13	9.83581e-15
		17.89	6.73e-14	1.03e-14	2.05634e-13	9.71053e-15
		17.91	6.3e-14	1.24e-14	2.01924e-13	1.26783e-14
		17.93	5.92e-14	1.06e-14	1.99218e-13	9.89334e-15
		17.95	6.5e-14	1.29e-14	2.04265e-13	1.04844e-14
		17.97	5.66e-14	9.32e-15	2.02056e-13	9.50958e-15
		17.99	6.25e-14	1.08e-14	2.02042e-13	8.35973e-15
		18.01	5.94e-14	9.48e-15	1.96648e-13	1.00044e-14
		18.03	5.97e-14	1.23e-14	1.96898e-13	1.02397e-14
		18.05	6.18e-14	1.22e-14	2.01135e-13	8.58191e-15
		18.07	5.97e-14	1.11e-14	2.02646e-13	1.11892e-14
		18.09	5.7e-14	1.22e-14	2.00756e-13	9.44107e-15
		18.11	5.26e-14	8.32e-15	2.01671e-13	1.21634e-14
		18.13	5.43e-14	1.14e-14	1.99972e-13	1.34362e-14
		18.15	5.44e-14	1.2e-14	1.95343e-13	1.09846e-14
		18.17	4.98e-14	8.67e-15	1.99208e-13	1.28012e-14
		18.19	5.5e-14	1.36e-14	1.99669e-13	1.17232e-14
		18.21	4.87e-14	6.84e-15	1.98806e-13	1.13816e-14
		18.23	5.18e-14	1.09e-14	2.04131e-13	1.39043e-14
		18.25	5.76e-14	8.94e-15	2.00454e-13	1.20161e-14
		18.27	5.41e-14	1.01e-14	1.9894e-13	1.0753e-14
		18.29	6.06e-14	1.12e-14	2.0024e-13	1.11512e-14
		18.31	5.81e-14	1.13e-14	1.9596e-13	1.2885e-14
		18.33	5.83e-14	1.4e-14	1.96594e-13	1.06546e-14
		18.35	5.41e-14	1.06e-14	1.99984e-13	1.16051e-14
		18.37	5.23e-14	1.01e-14	2.00031e-13	1.26255e-14
		18.39	4.71e-14	8.38e-15	2.0137e-13	1.22968e-14
		18.41	4.74e-14	5.88e-15	1.98244e-13	1.43086e-14
		18.43	5.23e-14	8.68e-15	2.04026e-13	1.23909e-14
		18.45	5.07e-14	8.62e-15	2.00974e-13	1.0059e-14
		18.47	5.29e-14	1.08e-14	2.00656e-13	1.15568e-14
		18.49	5.21e-14	9.5e-15	2.00456e-13	1.18189e-14
		18.51	4.75e-14	6.41e-15	1.93081e-13	1.11097e-14
		18.53	5.05e-14	9.64e-15	2.02277e-13	1.31824e-14
		18.55	4.99e-14	8.41e-15	1.98106e-13	1.07827e-14
		18.57	5.46e-14	9.01e-15	2.02431e-13	1.453e-14
		18.59	4.6e-14	7.09e-15	1.9628e-13	1.01241e-14
		18.61	4.79e-14	1e-14	1.97551e-13	1.1422e-14
		18.63	4.62e-14	1.01e-14	2.00712e-13	1.16295e-14
		18.65	5.21e-14	9.71e-15	2.02219e-13	1.40891e-14
		18.67	4.16e-14	7.52e-15	2.04161e-13	1.17016e-14
		18.69	4.78e-14	8.85e-15	2.02236e-13	1.04783e-14
		18.71	4.71e-14	9.65e-15	1.96332e-13	9.19593e-15
		18.73	4.73e-14	8.57e-15	2.03936e-13	1.38566e-14
		18.75	4.93e-14	6.56e-15	1.98589e-13	1.21982e-14
		18.77	4.86e-14	7.99e-15	2.00625e-13	1.11122e-14
		18.79	4.87e-14	1.23e-14	2.00008e-13	1.22332e-14
		18.81	4.76e-14	1.09e-14	2.01931e-13	1.25348e-14
		18.83	4.74e-14	9.92e-15	2.01193e-13	1.32044e-14
		18.85	4.53e-14	1e-14	2.00426e-13	1.23787e-14
		18.87	5.16e-14	8.3e-15	2.00762e-13	1.19367e-14
		18.89	3.88e-14	9.12e-15	2.01392e-13	1.06981e-14
		18.91	4.27e-14	7e-15	1.97077e-13	1.28872e-14
		18.93	4.27e-14	1.08e-14	1.98632e-13	1.38286e-14
		18.95	4.34e-14	9.14e-15	1.96949e-13	1.36045e-14
		18.97	4.11e-14	9.83e-15	2.03848e-13	1.26315e-14
		18.99	4.34e-14	6.3e-15	1.90827e-13	8.7634e-15
		19.01	4.79e-14	7.57e-15	1.99466e-13	1.12497e-14
		19.03	4.85e-14	1.19e-14	1.97844e-13	1.40892e-14
		19.05	4.32e-14	7.79e-15	2.01488e-13	1.33015e-14
		19.07	3.84e-14	7.87e-15	2.0149e-13	1.10944e-14
		19.09	4.48e-14	8.63e-15	2.0189e-13	1.39863e-14
		19.11	4.24e-14	8.14e-15	2.03177e-13	1.39856e-14
		19.13	3.95e-14	8.05e-15	2.02922e-13	1.1828e-14
		19.15	4.51e-14	7.28e-15	1.9511e-13	1.23259e-14
		19.17	4.25e-14	1.16e-14	1.98416e-13	1.53889e-14
		19.19	4.68e-14	1.17e-14	2.04065e-13	1.42384e-14
		19.21	4.51e-14	9.36e-15	1.96766e-13	1.20822e-14
		19.23	4.36e-14	9.67e-15	1.89035e-13	1.32966e-14
		19.25	3.8e-14	1.21e-14	1.94553e-13	1.27852e-14
		19.27	3.46e-14	7.43e-15	2.00587e-13	1.42854e-14
		19.29	4.05e-14	8.54e-15	2.02759e-13	1.13073e-14
		19.31	4.01e-14	9.31e-15	2.03128e-13	1.21861e-14
		19.33	3.35e-14	7.13e-15	2.04631e-13	1.24743e-14
		19.35	4.07e-14	6.25e-15	2.0086e-13	1.3662e-14
		19.37	4.09e-14	7.17e-15	2.01372e-13	1.22553e-14
		19.39	3.74e-14	7.16e-15	2.01728e-13	1.09942e-14
		19.41	3.78e-14	7.26e-15	2.0594e-13	1.55334e-14
		19.43	4.04e-14	8.04e-15	2.02945e-13	1.28189e-14
		19.45	3.37e-14	9.67e-15	1.98466e-13	1.22897e-14
		19.47	3.38e-14	7.17e-15	1.99831e-13	1.34087e-14
		19.49	3.79e-14	8.54e-15	1.95809e-13	1.0282e-14
		19.51	3.75e-14	9.52e-15	1.97314e-13	1.05519e-14
		19.53	3.23e-14	4.5e-15	2.01944e-13	1.2637e-14
		19.55	3.52e-14	6.61e-15	2.06063e-13	1.02434e-14
		19.57	3.14e-14	9.1e-15	2.04629e-13	1.21076e-14
		19.59	3.08e-14	5.28e-15	2.06296e-13	1.31505e-14
		19.61	3.35e-14	3.75e-15	2.04799e-13	1.14377e-14
		19.63	3.32e-14	7.99e-15	2.08618e-13	1.19737e-14
		19.65	3.31e-14	4.84e-15	2.07292e-13	1.06475e-14
		19.67	2.84e-14	8.19e-15	2.01001e-13	1.36738e-14
		19.69	3.4e-14	5.94e-15	2.047e-13	1.05617e-14
		19.71	3.54e-14	7.62e-15	2.06809e-13	1.33402e-14
		19.73	3.13e-14	7.71e-15	1.98537e-13	1.49668e-14
		19.75	3.78e-14	1.07e-14	2.07401e-13	1.32327e-14
		19.77	2.98e-14	5.85e-15	2.00551e-13	1.17596e-14
		19.79	3.02e-14	4.75e-15	2.04629e-13	1.12966e-14
		19.81	3.43e-14	6.41e-15	2.07836e-13	1.40648e-14
		19.83	2.96e-14	6.46e-15	2.07372e-13	1.52302e-14
		19.85	2.98e-14	1.02e-14	2.03022e-13	1.17046e-14
		19.87	3.71e-14	9.65e-15	2.04071e-13	1.31123e-14
		19.89	3.26e-14	1.17e-14	2.03502e-13	1.23517e-14
		19.91	3.84e-14	1.42e-14	2.07292e-13	1.25175e-14
		19.93	2.79e-14	6.51e-15	2.09873e-13	1.46034e-14
		19.95	3.01e-14	9.67e-15	2.04618e-13	1.2196e-14
		19.97	2.57e-14	6.71e-15	2.04624e-13	1.2048e-14
		19.99	3.09e-14	6.95e-15	2.05998e-13	1.14299e-14
		20.01	3.17e-14	8.54e-15	2.06695e-13	1.18047e-14
		20.03	2.98e-14	9.84e-15	2.03057e-13	1.27403e-14
		20.05	3.21e-14	7.28e-15	2.09229e-13	1.43796e-14
		20.07	3.29e-14	8.05e-15	2.10198e-13	1.42131e-14
		20.09	2.98e-14	8.64e-15	2.1588e-13	1.54629e-14
		20.11	2.79e-14	9.84e-15	2.11251e-13	1.48869e-14
		20.13	3.06e-14	8.24e-15	2.09552e-13	1.34332e-14
		20.15	3.48e-14	1.02e-14	2.06328e-13	1.49138e-14
		20.17	3.48e-14	9.69e-15	2.09973e-13	1.61179e-14
		20.19	2.27e-14	6.91e-15	2.09521e-13	1.56245e-14
		20.21	3.15e-14	1.07e-14	2.10057e-13	1.50914e-14
		20.23	2.94e-14	8.46e-15	2.09442e-13	1.63129e-14
		20.25	3.16e-14	8.1e-15	2.04743e-13	1.29379e-14
		20.27	2.91e-14	8.74e-15	2.04687e-13	1.6678e-14
		20.29	2.32e-14	9.7e-15	2.14818e-13	1.47549e-14
		20.31	2.44e-14	5.38e-15	2.18205e-13	1.50374e-14
		20.33	3.4e-14	7.88e-15	2.10691e-13	1.80348e-14
		20.35	3.48e-14	6.67e-15	2.12101e-13	1.79831e-14
		20.37	2.89e-14	5.73e-15	2.15404e-13	1.75987e-14
		20.39	2.63e-14	6.79e-15	2.12145e-13	1.76392e-14
		20.41	2.96e-14	8.63e-15	2.06286e-13	1.80736e-14
		20.43	2.71e-14	6.13e-15	2.08027e-13	1.94657e-14
		20.45	2.79e-14	1.11e-14	2.09836e-13	1.97037e-14
		20.47	3.15e-14	1.16e-14	2.21272e-13	1.92875e-14
		20.49	2.48e-14	7.83e-15	2.11494e-13	1.97532e-14
		20.51	3.26e-14	9.55e-15	2.18665e-13	1.98159e-14
		20.53	2.91e-14	6.74e-15	2.11924e-13	2.0671e-14
		20.55	2.99e-14	8.21e-15	2.15522e-13	1.90304e-14
		20.57	3.25e-14	9.84e-15	2.23126e-13	2.14488e-14
		20.59	2.92e-14	8.02e-15	2.17949e-13	2.18315e-14
		20.61	2.66e-14	7.61e-15	2.16272e-13	2.09648e-14
		20.63	2.77e-14	8.28e-15	2.15353e-13	2.09258e-14
		20.65	3.17e-14	6.48e-15	2.17834e-13	2.03329e-14
		20.67	2.86e-14	1.05e-14	2.14412e-13	2.09934e-14
		20.69	2.36e-14	7.78e-15	2.17086e-13	2.29172e-14
		20.71	2.67e-14	1.01e-14	2.16485e-13	2.0972e-14
		20.73	2.92e-14	8.46e-15	2.17883e-13	2.08663e-14
		20.75	2.64e-14	8.18e-15	2.20067e-13	2.10028e-14
		20.77	3.23e-14	1.06e-14	2.16846e-13	2.06745e-14
		20.79	2.64e-14	7.09e-15	2.2463e-13	2.09448e-14
		20.81	2.99e-14	9.61e-15	2.1905e-13	2.2837e-14
		20.83	2.6e-14	8.69e-15	2.18409e-13	2.3227e-14
		20.85	3.19e-14	1.13e-14	2.24497e-13	2.3706e-14
		20.87	2.93e-14	1.01e-14	2.18648e-13	2.35032e-14
		20.89	2.49e-14	8.99e-15	2.18035e-13	2.52679e-14
		20.91	2.87e-14	9.05e-15	2.18111e-13	2.46119e-14
		20.93	3e-14	1.17e-14	2.16949e-13	2.33272e-14
		20.95	2.94e-14	1.34e-14	2.092e-13	2.54784e-14
		20.97	3.16e-14	1.02e-14	2.20596e-13	2.47491e-14
		20.99	2.9e-14	1.11e-14	2.15569e-13	2.48085e-14
		21.01	2.77e-14	9.48e-15	2.23713e-13	2.41934e-14
		21.03	2.45e-14	8.23e-15	2.15951e-13	2.31625e-14
		21.05	2.5e-14	1e-14	2.16838e-13	2.32802e-14
		21.07	2.71e-14	1.1e-14	2.17943e-13	2.38946e-14
		21.09	2.86e-14	1.32e-14	2.23688e-13	2.33307e-14
		21.11	3.26e-14	1.51e-14	2.12116e-13	2.4024e-14
		21.13	3.04e-14	1.13e-14	2.20666e-13	2.42899e-14
		21.15	3.28e-14	1.09e-14	2.26403e-13	2.20677e-14
		21.17	3.61e-14	1.47e-14	2.22166e-13	2.13973e-14
		21.19	2.22e-14	7.44e-15	2.28305e-13	2.38216e-14
		21.21	2.64e-14	1.04e-14	2.28555e-13	2.2998e-14
		21.23	3.41e-14	1.37e-14	2.27217e-13	2.22728e-14
		21.25	2.78e-14	1.1e-14	2.22556e-13	2.29969e-14
		21.27	2.93e-14	1.26e-14	2.22792e-13	2.177e-14
		21.29	3.34e-14	1.15e-14	2.18074e-13	2.07425e-14
		21.31	2.96e-14	1.25e-14	2.21709e-13	1.98801e-14
		21.33	2.77e-14	1.08e-14	2.16955e-13	2.0458e-14
		21.35	2.11e-14	8.53e-15	2.13228e-13	1.88673e-14
		21.37	2.93e-14	1.32e-14	2.17807e-13	1.67198e-14
		21.39	2.89e-14	1.11e-14	2.17874e-13	1.76893e-14
		21.41	2.66e-14	8.94e-15	2.19682e-13	1.73395e-14
		21.43	2.68e-14	1.04e-14	2.11718e-13	1.62035e-14
		21.45	2.62e-14	1.06e-14	2.11353e-13	1.39922e-14
		21.47	3.74e-14	1.27e-14	2.11846e-13	1.20602e-14
		21.49	2.76e-14	1.11e-14	2.09695e-13	1.26037e-14
		21.51	3.17e-14	1.22e-14	2.11306e-13	1.1567e-14
		21.53	2.95e-14	1.05e-14	2.09894e-13	1.31854e-14
		21.55	2.22e-14	9.96e-15	2.07753e-13	1.24915e-14
		21.57	2.55e-14	1.2e-14	2.05856e-13	1.08255e-14
		21.59	2.59e-14	1.05e-14	2.03559e-13	1.15528e-14
		21.61	2.78e-14	8.22e-15	2.04539e-13	1.14959e-14
		21.63	2.68e-14	1.12e-14	2.02373e-13	1.08141e-14
		21.65	2.53e-14	9.65e-15	2.04514e-13	9.07627e-15
		21.67	2.88e-14	1.19e-14	2.07196e-13	1.07704e-14
		21.69	2.92e-14	1.07e-14	2.04026e-13	1.29066e-14
		21.71	2.5e-14	9.37e-15	1.99724e-13	1.04095e-14
		21.73	3.02e-14	1.22e-14	2.00784e-13	1.32085e-14
		21.75	2.93e-14	1e-14	2.06491e-13	1.09768e-14
		21.77	2.63e-14	1.1e-14	2.08071e-13	1.20902e-14
		21.79	3.53e-14	1.1e-14	2.04871e-13	1.18876e-14
		21.81	2.81e-14	1.13e-14	2.089e-13	1.3842e-14
		21.83	3.23e-14	1.17e-14	2.05932e-13	1.34608e-14
		21.85	2.53e-14	1.05e-14	2.05119e-13	1.25585e-14
		21.87	2.53e-14	9.38e-15	2.10476e-13	1.5824e-14
		21.89	3.22e-14	1.51e-14	2.08986e-13	1.39364e-14
		21.91	2.87e-14	1.04e-14	2.08963e-13	1.30242e-14
		21.93	2.9e-14	7.76e-15	2.02979e-13	1.29162e-14
		21.95	3.2e-14	1.16e-14	2.08582e-13	1.24007e-14
		21.97	3.02e-14	1.26e-14	2.12926e-13	1.38688e-14
		21.99	3.1e-14	1.11e-14	2.07066e-13	1.27618e-14
		22.01	3.12e-14	9.62e-15	2.10475e-13	1.42967e-14
		22.03	3.14e-14	1.21e-14	2.10029e-13	1.34586e-14
		22.05	2.71e-14	1.03e-14	2.10376e-13	1.34888e-14
		22.07	3.1e-14	8.99e-15	2.14303e-13	1.45593e-14
		22.09	2.5e-14	8.9e-15	2.17299e-13	1.63639e-14
		22.11	2.59e-14	9.39e-15	2.09192e-13	1.49304e-14
		22.13	2.98e-14	8.23e-15	2.09136e-13	1.61006e-14
		22.15	2.32e-14	9.94e-15	2.10058e-13	1.68011e-14
		22.17	2.64e-14	9.17e-15	2.10929e-13	1.52333e-14
		22.19	3.28e-14	1.18e-14	2.07052e-13	1.61383e-14
		22.21	2.49e-14	9.53e-15	2.1734e-13	1.64418e-14
		22.23	2.5e-14	1.14e-14	2.06767e-13	1.58803e-14
		22.25	2.28e-14	1e-14	2.11916e-13	1.48501e-14
		22.27	2.21e-14	1.02e-14	2.12739e-13	1.44216e-14
		22.29	2.43e-14	1.07e-14	2.03946e-13	1.50699e-14
		22.31	1.4e-14	7.11e-15	2.03174e-13	1.37177e-14
		22.33	2.44e-14	8.32e-15	2.10327e-13	1.59543e-14
		22.35	2.57e-14	9.85e-15	2.13877e-13	1.44407e-14
		22.37	2.38e-14	9.36e-15	2.05016e-13	1.44006e-14
		22.39	2.22e-14	5.85e-15	2.11155e-13	1.42158e-14
		22.41	2.76e-14	9.66e-15	2.15705e-13	1.53164e-14
		22.43	2.33e-14	8.18e-15	2.09945e-13	1.67091e-14
		22.45	2.79e-14	1.43e-14	2.07607e-13	1.35163e-14
		22.47	2.01e-14	7.3e-15	2.08617e-13	1.47391e-14
		22.49	1.98e-14	1.11e-14	2.04851e-13	1.33744e-14
		22.51	2.29e-14	9.3e-15	2.11043e-13	1.35628e-14
		22.53	2.61e-14	9.6e-15	2.13609e-13	1.48998e-14
		22.55	1.66e-14	9.33e-15	2.12079e-13	1.4047e-14
		22.57	1.97e-14	7.72e-15	2.06153e-13	1.19451e-14
		22.59	2.25e-14	9.75e-15	2.10128e-13	1.47274e-14
		22.61	2.04e-14	1.37e-14	2.0626e-13	1.37557e-14
		22.63	1.89e-14	1.12e-14	2.08053e-13	1.55393e-14
		22.65	1.63e-14	7.46e-15	2.13053e-13	1.62468e-14
		22.67	1.68e-14	9.36e-15	2.13887e-13	1.52247e-14
		22.69	2.04e-14	1.01e-14	2.08934e-13	1.58131e-14
		22.71	1.62e-14	9.02e-15	2.08571e-13	1.75673e-14
		22.73	2.35e-14	1.24e-14	2.10802e-13	1.8541e-14
		22.75	1.92e-14	8.98e-15	2.08164e-13	1.91225e-14
		22.77	2.03e-14	1.08e-14	2.11292e-13	1.69895e-14
		22.79	1.94e-14	1.15e-14	2.16238e-13	1.70756e-14
		22.81	1.92e-14	9.91e-15	2.12784e-13	1.75239e-14
		22.83	2.33e-14	1.03e-14	2.1108e-13	1.81601e-14
		22.85	1.91e-14	9.66e-15	2.17691e-13	2.0128e-14
		22.87	1.9e-14	1.37e-14	2.13612e-13	2.02403e-14
		22.89	2.5e-14	1.21e-14	2.12335e-13	1.86461e-14
		22.91	2.4e-14	1.3e-14	2.15051e-13	1.98606e-14
		22.93	1.76e-14	8.26e-15	2.12714e-13	1.84732e-14
		22.95	1.49e-14	9.28e-15	2.16095e-13	2.02393e-14
		22.97	1.94e-14	9.18e-15	2.15254e-13	2.06562e-14
		22.99	2e-14	9.35e-15	2.14541e-13	1.80133e-14
		23.01	2.16e-14	9.99e-15	2.14818e-13	1.99173e-14
		23.03	1.59e-14	1.04e-14	2.16627e-13	1.99165e-14
		23.05	2.32e-14	1.38e-14	2.15168e-13	1.78799e-14
		23.07	1.6e-14	1.28e-14	2.11437e-13	2.01197e-14
		23.09	2.5e-14	1.21e-14	2.17282e-13	2.1919e-14
		23.11	1.38e-14	8.47e-15	2.12398e-13	1.90652e-14
		23.13	2.05e-14	1e-14	2.13176e-13	1.93526e-14
		23.15	1.17e-14	7.84e-15	2.16753e-13	2.04123e-14
		23.17	1.54e-14	7.5e-15	2.18006e-13	1.90782e-14
		23.19	1.65e-14	8.65e-15	2.14061e-13	1.93209e-14
		23.21	1.35e-14	1.06e-14	2.15415e-13	2.09761e-14
		23.23	1.81e-14	9.94e-15	2.16985e-13	2.03298e-14
		23.25	1.47e-14	7.54e-15	2.16406e-13	1.99184e-14
		23.27	1.74e-14	9e-15	2.15328e-13	1.8891e-14
		23.29	1.48e-14	9.41e-15	2.19037e-13	1.95226e-14
		23.31	1.36e-14	9.32e-15	2.09279e-13	1.87406e-14
		23.33	1.16e-14	8.62e-15	2.16042e-13	2.08356e-14
		23.35	1.74e-14	8.32e-15	2.13801e-13	1.93642e-14
		23.37	1.48e-14	9.05e-15	2.13839e-13	1.93041e-14
		23.39	9.23e-15	8.75e-15	2.06623e-13	1.89058e-14
		23.41	7.76e-15	7.4e-15	2.15278e-13	2.00922e-14
		23.43	1.42e-14	8.95e-15	2.0848e-13	1.86252e-14
		23.45	1.22e-14	9.41e-15	2.10795e-13	1.79228e-14
		23.47	1.03e-14	1.03e-14	2.10339e-13	1.78975e-14
		23.49	5.86e-15	6.97e-15	2.06456e-13	1.89207e-14
		23.51	1.19e-14	8.64e-15	2.11356e-13	1.94297e-14
		23.53	7.36e-15	8.04e-15	2.13434e-13	1.90852e-14
		23.55	6.52e-15	5.19e-15	2.06361e-13	1.84386e-14
		23.57	4.28e-15	6.22e-15	2.14171e-13	1.99535e-14
		23.59	1.09e-14	7.38e-15	2.08214e-13	1.67509e-14
		23.61	7.11e-15	4.94e-15	2.11183e-13	1.98993e-14
		23.63	1.52e-14	7.7e-15	2.14116e-13	2.0225e-14
		23.65	1.42e-14	8.21e-15	2.08231e-13	2.08081e-14
		23.67	3.88e-15	5.48e-15	2.11411e-13	1.79299e-14
		23.69	1.16e-14	7.75e-15	2.17225e-13	1.8651e-14
		23.71	8.38e-15	6.82e-15	2.17925e-13	1.84405e-14
		23.73	1.26e-14	9.65e-15	2.1176e-13	1.85462e-14
		23.75	1.4e-14	8.07e-15	2.16771e-13	1.60798e-14
		23.77	9.98e-15	9.59e-15	2.12449e-13	1.59492e-14
		23.79	1.2e-14	5.32e-15	2.15675e-13	1.64549e-14
		23.81	1.21e-14	8.91e-15	2.1813e-13	1.91658e-14
		23.83	9.41e-15	6.66e-15	2.15295e-13	1.6142e-14
		23.85	5.41e-15	2.91e-15	2.16021e-13	1.58261e-14
		23.87	1.29e-14	6.96e-15	2.12784e-13	1.60202e-14
		23.89	8.31e-15	7.76e-15	2.16292e-13	1.53676e-14
		23.91	1.63e-14	7.54e-15	2.14455e-13	1.57037e-14
		23.93	1.02e-14	5.29e-15	2.0802e-13	1.71801e-14
		23.95	9.71e-15	8.12e-15	2.15381e-13	1.43705e-14
		23.97	1.67e-14	1e-14	2.15145e-13	1.58084e-14
		23.99	1.49e-14	6.11e-15	2.12977e-13	1.65826e-14
		24.01	1.66e-14	7.05e-15	2.127e-13	1.59204e-14
		24.03	1.54e-14	1.34e-14	2.11767e-13	1.61686e-14
		24.05	1.35e-14	7.85e-15	2.16154e-13	1.68936e-14
		24.07	1.48e-14	6.05e-15	2.14049e-13	1.57912e-14
		24.09	8.81e-15	5.05e-15	2.17872e-13	1.69531e-14
		24.11	1.13e-14	7.56e-15	2.21836e-13	1.71533e-14
		24.13	1.49e-14	9.35e-15	2.20915e-13	1.53244e-14
		24.15	1.33e-14	1.19e-14	2.21029e-13	1.73097e-14
		24.17	9.65e-15	6.9e-15	2.2127e-13	1.66497e-14
		24.19	1.67e-14	5.82e-15	2.20293e-13	1.72535e-14
		24.21	7.52e-15	8.95e-15	2.17793e-13	1.68205e-14
		24.23	1.07e-14	7.1e-15	2.21922e-13	1.87718e-14
		24.25	4.22e-15	6.74e-15	2.17766e-13	1.76724e-14
		24.27	1.28e-14	9.8e-15	2.24812e-13	1.89257e-14
		24.29	2.62e-15	8.69e-15	2.19421e-13	2.00357e-14
		24.31	1.15e-14	8.86e-15	2.19289e-13	1.94718e-14
		24.33	9.36e-15	6.63e-15	2.2332e-13	1.94517e-14
		24.35	7.74e-15	1.15e-14	2.21025e-13	2.00925e-14
		24.37	1.33e-14	8.89e-15	2.2117e-13	1.94346e-14
		24.39	1.1e-14	7.5e-15	2.1602e-13	1.77288e-14
		24.41	1.27e-14	6.86e-15	2.22002e-13	2.02885e-14
		24.43	1.37e-14	1.34e-14	2.19849e-13	2.14378e-14
		24.45	1.5e-14	1.16e-14	2.2263e-13	2.13822e-14
		24.47	1.5e-14	7.81e-15	2.20699e-13	1.82393e-14
		24.49	8.62e-15	8.94e-15	2.23014e-13	2.07466e-14
		24.51	1.44e-14	1.11e-14	2.20293e-13	1.92971e-14
		24.53	2.86e-15	1.07e-14	2.21032e-13	2.04773e-14
		24.55	1.28e-14	1.22e-14	2.19687e-13	2.09718e-14
		24.57	5.58e-15	9.93e-15	2.20579e-13	1.9483e-14
		24.59	8.51e-15	8.7e-15	2.20408e-13	1.89296e-14
		24.61	1.44e-14	8.84e-15	2.23609e-13	1.87749e-14
		24.63	1.59e-14	1.35e-14	2.17893e-13	2.08625e-14
		24.65	1.12e-14	8.78e-15	2.16775e-13	2.03669e-14
		24.67	1.2e-14	9.68e-15	2.19004e-13	2.24719e-14
		24.69	8.36e-15	8.51e-15	2.1859e-13	2.05549e-14
		24.71	8.91e-15	1.04e-14	2.18195e-13	2.12036e-14
		24.73	7.02e-15	9.74e-15	2.20685e-13	1.84255e-14
		24.75	4.19e-15	8.94e-15	2.20715e-13	1.89516e-14
		24.77	6.26e-15	9.32e-15	2.17812e-13	1.97164e-14
		24.79	3.9e-15	1.07e-14	2.24205e-13	1.7918e-14
		24.81	6.6e-15	1.07e-14	2.24698e-13	1.94828e-14
		24.83	5.69e-15	7.74e-15	2.25455e-13	1.96983e-14
		24.85	-6.74e-16	8.35e-15	2.22393e-13	1.85986e-14
		24.87	8.52e-15	9.61e-15	2.21178e-13	1.88004e-14
		24.89	1.07e-14	1.04e-14	2.2153e-13	1.80103e-14
		24.91	-1.29e-17	9.49e-15	2.20579e-13	1.67753e-14
		24.93	5.26e-15	9.85e-15	2.22301e-13	1.8195e-14
		24.95	8.09e-15	1.2e-14	2.23016e-13	1.87853e-14
		24.97	4.34e-15	1.27e-14	2.24538e-13	1.94604e-14
		24.99	4.86e-15	1.39e-14	2.2064e-13	1.65317e-14
		25.01	4.79e-15	1.04e-14	2.26882e-13	1.7539e-14
		25.03	5.67e-15	1.59e-14	2.28133e-13	1.75122e-14
		25.05	6.34e-15	9.25e-15	2.23059e-13	1.72098e-14
		25.07	4.36e-15	5.03e-15	2.1822e-13	1.63672e-14
		25.09	1.12e-14	1.09e-14	2.25135e-13	1.63049e-14
		25.11	5.17e-15	1.25e-14	2.24562e-13	1.6593e-14
		25.13	1.56e-15	1.05e-14	2.22889e-13	1.5916e-14
		25.15	4.61e-15	1.01e-14	2.1915e-13	1.82283e-14
		25.17	3.95e-15	1.07e-14	2.21356e-13	1.77748e-14
		25.19	6.58e-15	1.12e-14	2.22072e-13	1.82454e-14
		25.21	1.08e-15	6.66e-15	2.2518e-13	1.96123e-14
		25.23	6.87e-15	1.19e-14	2.182e-13	1.82741e-14
		25.25	4.68e-15	1.16e-14	2.261e-13	1.95236e-14
		25.27	8.38e-15	1.16e-14	2.307e-13	1.82249e-14
		25.29	5.33e-15	1.24e-14	2.20114e-13	1.84953e-14
		25.31	4.45e-15	8.67e-15	2.23398e-13	1.85953e-14
		25.33	5.18e-15	1.16e-14	2.25746e-13	1.77287e-14
		25.35	2.94e-15	1.23e-14	2.23996e-13	1.75395e-14
		25.37	3.12e-15	7.47e-15	2.21454e-13	1.82665e-14
		25.39	1.33e-15	1.09e-14	2.23288e-13	1.78328e-14
		25.41	5.36e-15	6.43e-15	2.23704e-13	1.54621e-14

## Sheet: 20 ms x 15_1 Hz
		Figure S1C_traces						Figure S1C_Endo rates						1Hz_Average Endo Rate (#12-15) bar graph data
		Time (S)	Control		Dyn 1 PRD			Stimulation (#)	Control		Dyn 1 PRD				Control	Dyn1-PRD
			Mean	SEM	Mean	SEM			Mean	SEM	Mean	SEM		Average	2.51e-13	1.32e-13
														SEM	2.83e-14	9.8e-15
		0.01	-1.44127e-14	1.58993e-14	4.77324e-15	1.97311e-14		1	3.34028e-14	1.3084e-14	2.44966e-14	7.00016e-15		n-number	6	7
		0.03	-1.55127e-14	1.49361e-14	7.47214e-15	6.45056e-15		2	8.80248e-14	3.02164e-14	1.81415e-14	1.56079e-14		p-value	-	0.001
		0.05	-1.65276e-14	1.42985e-14	2.67314e-15	6.19827e-15		3	1.22724e-13	2.68595e-14	5.07183e-14	9.74962e-15
		0.07	-1.31875e-14	1.53443e-14	1.18881e-15	8.01071e-15		4	1.383e-13	2.16084e-14	7.26386e-14	1.61742e-14
		0.09	-1.63597e-14	1.51564e-14	2.82871e-16	9.57589e-15		5	1.71628e-13	2.8921e-14	7.98008e-14	1.1287e-14
		0.11	-1.45127e-14	1.32527e-14	-7.10148e-15	5.58445e-15		6	1.68912e-13	3.04438e-14	9.74171e-14	1.53016e-14
		0.13	-1.43899e-14	1.59801e-14	-4.10209e-16	8.47336e-15		7	2.06175e-13	2.40631e-14	1.11389e-13	9.68364e-15
		0.15	-1.1436e-14	1.71419e-14	-2.51195e-15	4.5328e-15		8	2.17521e-13	2.41548e-14	1.10135e-13	1.41906e-14
		0.17	-1.64151e-14	1.47417e-14	-4.15737e-15	7.8795e-15		9	2.15813e-13	2.87829e-14	1.10999e-13	1.21921e-14
		0.19	-1.49016e-14	1.45414e-14	-4.81042e-15	4.74093e-15		10	2.4076e-13	2.35934e-14	1.33124e-13	1.04288e-14
		0.21	-1.19354e-14	1.53621e-14	-5.37873e-15	3.84039e-15		11	2.33253e-13	3.57457e-14	1.13633e-13	1.80143e-14
		0.23	-1.69056e-14	1.43259e-14	-7.59337e-15	5.72918e-15		12	2.58891e-13	2.5963e-14	1.34642e-13	7.73788e-15
		0.25	-1.98588e-14	1.31853e-14	-7.68021e-15	5.63332e-15		13	2.48155e-13	2.99232e-14	1.26166e-13	1.71759e-14
		0.27	-1.35975e-14	1.58067e-14	-2.59102e-15	4.71542e-15		14	2.61051e-13	3.76162e-14	1.27641e-13	1.28841e-14
		0.29	-1.27182e-14	1.51204e-14	-2.7964e-15	4.26408e-15		15	2.64782e-13	2.70374e-14	1.41251e-13	1.46979e-14
		0.31	-1.6472e-14	1.30956e-14	-6.41757e-15	7.00641e-15
		0.33	-1.77131e-14	1.41081e-14	-3.74891e-15	5.46771e-15
		0.35	-1.70576e-14	1.41642e-14	-5.51716e-15	2.91901e-15
		0.37	-1.79687e-14	1.19531e-14	-8.91975e-15	3.65819e-15
		0.39	-2.05763e-14	1.2035e-14	-7.05739e-15	6.46166e-15
		0.41	-2.06466e-14	1.30062e-14	-5.43012e-15	6.90978e-15
		0.43	-1.41578e-14	1.41547e-14	-8.13675e-15	3.68528e-15
		0.45	-1.1752e-14	1.42271e-14	-6.461e-15	6.71366e-15
		0.47	-1.2507e-14	1.19725e-14	-6.24599e-15	3.37325e-15
		0.49	-9.0243e-15	1.43105e-14	-7.50099e-15	4.79601e-15
		0.51	-1.2983e-14	1.41754e-14	-5.0657e-15	4.96887e-15
		0.53	-1.54344e-14	1.23562e-14	-9.43208e-15	3.59037e-15
		0.55	-1.54457e-14	1.29667e-14	-1.12902e-14	2.94021e-15
		0.57	-9.66858e-15	1.40661e-14	-7.29799e-15	3.58264e-15
		0.59	-1.51772e-14	1.08665e-14	-6.41267e-15	4.70788e-15
		0.61	-7.60162e-15	1.49421e-14	-7.04185e-15	3.73261e-15
		0.63	-5.57424e-15	1.37986e-14	-4.74246e-15	7.69089e-15
		0.65	-1.26142e-14	1.20609e-14	-3.86177e-15	6.30938e-15
		0.67	-1.42223e-14	1.3089e-14	-4.02989e-15	4.61037e-15
		0.69	-1.17636e-14	1.26614e-14	-3.58417e-15	3.41611e-15
		0.71	-1.5615e-15	1.84619e-14	-2.97229e-15	7.24705e-15
		0.73	-4.88906e-15	1.32084e-14	-1.17591e-15	4.39123e-15
		0.75	-1.27709e-14	1.33337e-14	-7.64851e-16	3.65935e-15
		0.77	-1.01707e-14	1.29157e-14	-5.21794e-15	7.37355e-15
		0.79	-1.14177e-14	1.12352e-14	-1.88019e-15	4.9579e-15
		0.81	-1.42474e-14	1.03655e-14	1.94259e-15	3.07057e-15
		0.83	-1.27247e-14	1.32327e-14	1.1728e-15	5.65986e-15
		0.85	-1.41352e-14	1.00253e-14	-4.0157e-15	4.71774e-15
		0.87	-1.08435e-14	1.07656e-14	-6.74022e-15	6.09648e-15
		0.89	-4.67629e-15	1.56911e-14	3.54854e-15	4.50506e-15
		0.91	-6.94982e-15	1.37802e-14	2.04643e-16	4.19145e-15
		0.93	-1.4256e-14	1.10227e-14	-1.21834e-15	6.07097e-15
		0.95	-1.70578e-14	1.23442e-14	-1.15656e-14	6.07067e-15
		0.97	-1.52953e-14	9.81988e-15	-5.77003e-15	7.22642e-15
		0.99	-8.14137e-15	1.35341e-14	-2.17973e-15	4.8741e-15
		1.01	-1.01079e-14	1.13271e-14	-4.86968e-15	4.95994e-15
		1.03	-6.82786e-15	1.13507e-14	-4.71436e-15	5.21096e-15
		1.05	-1.06006e-14	1.14322e-14	-1.32757e-14	5.52774e-15
		1.07	-1.00714e-14	1.35268e-14	-6.27732e-15	4.97974e-15
		1.09	-1.20139e-14	1.08951e-14	-4.99828e-15	5.2432e-15
		1.11	-6.58366e-15	1.23395e-14	-4.29066e-15	8.46779e-15
		1.13	-1.42607e-14	1.08895e-14	-3.08726e-15	5.65406e-15
		1.15	-1.51354e-14	1.00525e-14	-7.90524e-15	4.89658e-15
		1.17	-1.18484e-14	1.18586e-14	-6.95137e-15	5.15757e-15
		1.19	-1.70159e-14	1.20902e-14	-6.74071e-15	6.6679e-15
		1.21	-9.87373e-15	1.20232e-14	-7.33326e-15	5.09565e-15
		1.23	-1.07029e-14	1.04589e-14	-6.54602e-15	6.65211e-15
		1.25	-9.83329e-15	1.11405e-14	-6.75602e-15	6.7339e-15
		1.27	-7.60068e-15	1.13944e-14	-6.7504e-15	8.72295e-15
		1.29	-1.31047e-14	1.01471e-14	-7.95772e-15	6.80586e-15
		1.31	-1.18797e-14	1.05127e-14	-2.99601e-15	7.44669e-15
		1.33	-8.04234e-15	1.2374e-14	-7.54832e-15	3.48651e-15
		1.35	-1.20999e-14	1.02585e-14	-3.90477e-15	5.94994e-15
		1.37	-1.45658e-14	9.97368e-15	-6.95197e-15	6.9277e-15
		1.39	-1.21276e-14	9.6273e-15	-3.87615e-15	6.9721e-15
		1.41	-9.07244e-15	1.41896e-14	-8.88642e-15	4.06906e-15
		1.43	-1.19186e-14	1.17042e-14	-9.34122e-15	3.7913e-15
		1.45	-1.47407e-14	1.16527e-14	-5.53178e-15	7.2941e-15
		1.47	-1.07661e-14	1.18046e-14	-4.68748e-15	6.31142e-15
		1.49	-1.057e-14	1.11979e-14	-7.807e-15	5.79195e-15
		1.51	-8.4164e-15	1.15125e-14	-7.91171e-15	5.27087e-15
		1.53	-1.11708e-14	1.1567e-14	-1.32151e-14	5.53446e-15
		1.55	-1.42961e-14	1.07554e-14	-1.43298e-14	7.70221e-15
		1.57	-1.21079e-14	1.11579e-14	-1.07925e-14	6.21104e-15
		1.59	-5.6522e-15	1.2813e-14	-6.31959e-15	4.2458e-15
		1.61	-1.26279e-14	1.14628e-14	-1.0215e-14	5.30454e-15
		1.63	-6.93781e-15	1.21348e-14	-5.19815e-15	6.33455e-15
		1.65	-1.32519e-14	1.11615e-14	-6.38949e-15	4.15568e-15
		1.67	-1.10804e-14	9.30388e-15	-1.09114e-14	3.8573e-15
		1.69	-4.45946e-15	1.28906e-14	-1.11253e-14	7.8372e-15
		1.71	-1.01618e-14	1.43513e-14	-5.23265e-15	7.40966e-15
		1.73	-9.60553e-15	1.21561e-14	-6.09002e-15	8.38499e-15
		1.75	-1.35728e-14	1.17147e-14	-7.19888e-15	4.08827e-15
		1.77	-1.36637e-14	8.74243e-15	-1.07492e-14	3.61392e-15
		1.79	-1.24137e-14	1.16561e-14	-6.71923e-15	5.11386e-15
		1.81	-1.24417e-14	1.06729e-14	-7.80936e-15	4.30049e-15
		1.83	-1.60193e-14	1.24701e-14	-8.30249e-15	5.54665e-15
		1.85	-9.29523e-15	1.27441e-14	-4.32251e-15	6.56641e-15
		1.87	-4.79054e-15	1.25591e-14	-1.17227e-14	5.61052e-15
		1.89	-6.36342e-15	1.34466e-14	-7.26043e-15	2.04264e-15
		1.91	-6.0246e-15	1.27888e-14	-4.30975e-15	3.95551e-15
		1.93	2.31827e-15	1.77594e-14	-1.06567e-14	4.29566e-15
		1.95	-8.58351e-15	1.16654e-14	-1.19073e-14	4.70129e-15
		1.97	-3.5517e-15	1.48097e-14	-3.85961e-15	7.01715e-15
		1.99	-1.55728e-14	9.20663e-15	-6.34951e-15	5.79102e-15
		2.01	-9.06862e-15	1.0586e-14	-7.59986e-15	6.48382e-15
		2.03	-6.18133e-15	1.06099e-14	-8.01183e-15	4.10073e-15
		2.05	-4.96168e-15	1.27141e-14	-1.20821e-14	6.26867e-15
		2.07	-1.61484e-14	1.01284e-14	-5.13937e-15	7.9663e-15
		2.09	-1.35655e-14	1.05042e-14	-1.04689e-14	4.0574e-15
		2.11	-1.1302e-14	1.08832e-14	-1.19206e-14	4.73095e-15
		2.13	-1.43168e-14	1.03014e-14	-1.17479e-14	5.62829e-15
		2.15	-1.24475e-14	9.51652e-15	-7.28701e-15	5.61694e-15
		2.17	-1.41919e-14	9.22458e-15	-8.85662e-15	7.65095e-15
		2.19	-1.61152e-14	8.91536e-15	-1.18016e-14	4.15096e-15
		2.21	-1.41635e-14	8.03377e-15	-9.98043e-15	5.39564e-15
		2.23	-8.84788e-15	8.61579e-15	-1.28412e-14	4.77556e-15
		2.25	-1.01095e-14	1.15464e-14	-1.81954e-14	4.6437e-15
		2.27	-1.51334e-14	8.9073e-15	-1.3485e-14	4.55482e-15
		2.29	-1.47665e-14	9.34339e-15	-1.58092e-14	7.39538e-15
		2.31	-9.36856e-15	8.23425e-15	-1.40037e-14	4.6326e-15
		2.33	-9.20843e-15	8.75963e-15	-1.43209e-14	3.63888e-15
		2.35	-1.2531e-14	8.27427e-15	-1.47715e-14	4.38081e-15
		2.37	-7.04165e-15	1.13861e-14	-1.38893e-14	3.65567e-15
		2.39	-7.74054e-15	1.00143e-14	-1.13643e-14	2.84776e-15
		2.41	-9.25216e-15	7.8197e-15	-1.12678e-14	5.23542e-15
		2.43	-8.63147e-15	9.86828e-15	-8.94787e-15	4.50381e-15
		2.45	-1.10376e-14	9.03832e-15	-1.43839e-14	3.58956e-15
		2.47	-2.76784e-15	1.24551e-14	-1.2221e-14	3.63181e-15
		2.49	-1.16226e-14	8.95662e-15	-1.2299e-14	1.86882e-15
		2.51	-9.30938e-15	8.65393e-15	-9.8016e-15	4.57498e-15
		2.53	-1.19577e-14	6.83572e-15	-1.44021e-14	7.05283e-15
		2.55	-1.15891e-14	7.65551e-15	-9.46108e-15	6.13669e-15
		2.57	-7.59154e-15	1.03869e-14	-1.16129e-14	4.01376e-15
		2.59	-8.61719e-15	7.80354e-15	-1.59812e-14	4.87614e-15
		2.61	-8.62814e-15	6.94362e-15	-1.66663e-14	4.4042e-15
		2.63	-3.41875e-15	7.9207e-15	-1.14401e-14	5.9003e-15
		2.65	-4.26755e-15	1.07037e-14	-1.13125e-14	7.28852e-15
		2.67	-5.3334e-15	7.99746e-15	-1.43398e-14	5.90944e-15
		2.69	-7.18387e-15	8.83055e-15	-1.25433e-14	5.52987e-15
		2.71	-3.9323e-15	9.50236e-15	-5.08542e-15	6.07661e-15
		2.73	-4.28553e-15	9.73312e-15	-1.06235e-14	6.07275e-15
		2.75	-1.51235e-15	9.343e-15	-9.66102e-15	9.68106e-15
		2.77	-5.81993e-15	9.32912e-15	-8.12239e-15	9.07515e-15
		2.79	-6.58998e-15	8.73988e-15	-4.89814e-15	5.824e-15
		2.81	-1.45353e-15	1.09346e-14	-8.73954e-15	5.03108e-15
		2.83	-1.24177e-14	7.63009e-15	-6.70372e-15	6.73501e-15
		2.85	-9.90375e-15	8.69071e-15	-8.92966e-15	6.47356e-15
		2.87	-1.05363e-14	7.36478e-15	-7.67234e-15	5.65583e-15
		2.89	-5.19492e-15	9.02612e-15	-9.68552e-15	5.86566e-15
		2.91	-6.49958e-15	8.12536e-15	-1.37839e-14	6.32626e-15
		2.93	-1.12288e-14	7.59464e-15	-1.39986e-14	6.48171e-15
		2.95	-4.72891e-15	8.91864e-15	-2.16112e-15	9.28083e-15
		2.97	-4.27762e-15	1.00946e-14	-4.52116e-15	1.00078e-14
		2.99	-4.73607e-15	5.8892e-15	-8.14377e-15	8.4156e-15
		3.01	-6.79361e-15	9.1475e-15	-1.15311e-14	7.93526e-15
		3.03	-1.73436e-15	8.20231e-15	-1.7338e-15	6.05651e-15
		3.05	-4.97152e-15	8.41508e-15	-9.93219e-15	4.45352e-15
		3.07	-6.42109e-15	7.80846e-15	1.90632e-15	1.0958e-14
		3.09	3.20857e-15	1.33494e-14	-9.70273e-15	4.63412e-15
		3.11	-4.19512e-15	9.84989e-15	-3.94283e-16	5.99922e-15
		3.13	-8.22336e-15	8.06892e-15	-7.63055e-15	4.96333e-15
		3.15	-3.25803e-15	7.06148e-15	-1.06323e-14	6.97966e-15
		3.17	-3.20478e-15	8.46216e-15	-5.33865e-15	5.46807e-15
		3.19	-1.03621e-14	6.714e-15	-5.13193e-15	5.50989e-15
		3.21	-3.4833e-15	8.01725e-15	-9.03542e-15	5.55876e-15
		3.23	-7.47468e-15	6.69724e-15	-1.0271e-14	4.15106e-15
		3.25	-1.02948e-14	9.14706e-15	-7.46115e-15	6.20336e-15
		3.27	-6.7013e-15	6.20944e-15	-1.03432e-14	4.46346e-15
		3.29	-9.63307e-15	7.14146e-15	-8.06976e-15	4.50268e-15
		3.31	-7.44119e-15	6.2841e-15	-8.85854e-15	6.34588e-15
		3.33	-1.56619e-14	7.909e-15	-6.27805e-15	6.93919e-15
		3.35	-7.43388e-15	6.70553e-15	-8.24546e-15	6.63958e-15
		3.37	-1.04417e-14	6.89006e-15	-1.03252e-14	6.42661e-15
		3.39	-8.43224e-15	7.18913e-15	-7.06968e-15	5.42558e-15
		3.41	-1.65809e-14	7.79554e-15	-9.35772e-15	3.84349e-15
		3.43	-9.88342e-15	7.05228e-15	-1.13426e-14	3.57567e-15
		3.45	-1.04302e-14	6.61162e-15	-9.98002e-15	4.06944e-15
		3.47	1.44188e-15	9.85592e-15	-8.09405e-15	3.78395e-15
		3.49	-9.46875e-15	6.92928e-15	-5.99005e-15	4.5459e-15
		3.51	-1.0052e-14	5.66808e-15	-4.38715e-15	4.68465e-15
		3.53	-1.44053e-14	6.72752e-15	-6.3268e-15	3.25757e-15
		3.55	-5.93326e-15	5.84208e-15	-1.04291e-14	4.72949e-15
		3.57	-8.96479e-15	6.31036e-15	-1.13922e-14	6.34069e-15
		3.59	-7.46596e-15	8.06265e-15	-5.26172e-15	5.29228e-15
		3.61	-7.47024e-15	5.47796e-15	-9.66519e-15	4.15987e-15
		3.63	-4.28531e-15	7.06555e-15	-7.22897e-15	4.27362e-15
		3.65	-1.09459e-14	5.2597e-15	-9.66796e-15	7.11042e-15
		3.67	-9.27858e-15	5.59636e-15	-1.50004e-14	7.23869e-15
		3.69	-5.42626e-15	6.22931e-15	-6.66325e-15	6.07675e-15
		3.71	-2.10831e-15	7.56701e-15	-7.50576e-15	3.81517e-15
		3.73	-3.19307e-15	7.1075e-15	-1.34294e-14	6.245e-15
		3.75	-4.02338e-15	7.32038e-15	-5.63176e-15	4.3749e-15
		3.77	-3.64894e-15	5.27031e-15	-8.66858e-15	5.59584e-15
		3.79	-6.79601e-15	6.81465e-15	-5.00017e-15	2.64524e-15
		3.81	-3.10198e-15	6.79689e-15	-5.10703e-15	4.00546e-15
		3.83	-9.29487e-15	5.75515e-15	-1.06507e-14	4.67916e-15
		3.85	-1.81945e-15	8.30314e-15	-8.06e-15	4.74615e-15
		3.87	-5.29943e-15	6.28271e-15	-6.27566e-15	3.34573e-15
		3.89	-4.71281e-15	7.09718e-15	-1.05265e-14	4.01756e-15
		3.91	-4.1687e-15	8.11245e-15	-5.45715e-15	4.79344e-15
		3.93	-6.43861e-15	7.26467e-15	-7.91827e-15	5.64966e-15
		3.95	1.21282e-15	1.03082e-14	-8.0903e-15	3.13501e-15
		3.97	-8.29997e-15	5.52479e-15	-4.37019e-15	4.60584e-15
		3.99	-6.51879e-15	8.59187e-15	-4.23305e-15	4.88811e-15
		4.01	-2.75329e-15	6.10259e-15	-6.11239e-15	5.52148e-15
		4.03	-1.94691e-15	5.7646e-15	-3.34152e-15	3.8344e-15
		4.05	-1.32097e-15	8.60521e-15	-1.04681e-14	4.24629e-15
		4.07	-4.80671e-15	4.00166e-15	-3.84248e-15	3.52285e-15
		4.09	-2.72193e-15	3.34607e-15	-4.93573e-15	3.90272e-15
		4.11	-3.22762e-15	6.5329e-15	-1.17923e-14	5.70472e-15
		4.13	-6.4605e-15	4.61432e-15	-1.23304e-15	3.55006e-15
		4.15	-8.61201e-15	5.72479e-15	-2.70871e-15	3.33698e-15
		4.17	-2.3717e-15	4.4056e-15	-3.61773e-15	3.67944e-15
		4.19	-1.51024e-15	6.16692e-15	-3.7973e-15	4.73392e-15
		4.21	-1.40541e-16	6.41423e-15	-1.50625e-15	4.03473e-15
		4.23	-1.05111e-15	3.90919e-15	-4.9217e-15	2.35316e-15
		4.25	8.46264e-16	5.34326e-15	-7.90605e-15	4.49729e-15
		4.27	-4.28251e-15	5.44592e-15	-6.89524e-15	5.64311e-15
		4.29	5.16256e-15	8.83405e-15	-2.03838e-15	3.06073e-15
		4.31	-5.47166e-15	5.50402e-15	-6.68042e-15	2.95216e-15
		4.33	-3.37467e-15	1.57247e-15	-7.15091e-15	3.92265e-15
		4.35	-7.91511e-15	4.58189e-15	-4.84625e-15	4.69773e-15
		4.37	1.8605e-16	3.64986e-15	-7.49721e-15	4.43233e-15
		4.39	-4.23001e-16	3.39149e-15	-1.01216e-14	4.46866e-15
		4.41	9.31537e-16	3.83449e-15	-5.19255e-15	2.33753e-15
		4.43	-2.53499e-15	2.79447e-15	-8.39319e-15	5.30348e-15
		4.45	-6.54941e-15	6.48154e-15	-1.22002e-14	4.937e-15
		4.47	-2.82756e-15	2.93619e-15	-1.27348e-14	4.08462e-15
		4.49	-6.93193e-16	2.39364e-15	-8.54181e-15	5.20336e-15
		4.51	-4.57249e-15	4.29919e-15	-6.83229e-15	3.4226e-15
		4.53	-6.01123e-15	2.87188e-15	-8.5738e-15	2.42847e-15
		4.55	-6.99699e-15	3.00437e-15	-7.46201e-15	1.55528e-15
		4.57	-1.38695e-15	3.46658e-15	-1.02763e-15	4.80996e-15
		4.59	-5.05755e-15	3.20623e-15	-6.97536e-15	5.33999e-15
		4.61	1.85814e-15	4.62212e-15	-7.46479e-15	5.62145e-15
		4.63	-2.40703e-16	4.45035e-15	-1.05855e-14	3.44321e-15
		4.65	-1.04558e-15	3.44757e-15	-5.56972e-15	4.64209e-15
		4.67	1.42445e-15	5.14879e-15	-6.74734e-15	2.34374e-15
		4.69	-8.06475e-15	6.93962e-15	-8.27192e-15	5.72526e-15
		4.71	-3.88132e-15	3.35061e-15	-4.69224e-15	4.78137e-15
		4.73	-4.37947e-16	4.64059e-15	-8.41945e-15	4.98951e-15
		4.75	-3.18844e-15	3.33241e-15	-4.30075e-15	4.97416e-15
		4.77	-3.25128e-15	2.02767e-15	-1.90897e-15	4.46918e-15
		4.79	-6.8759e-15	4.13431e-15	-6.64842e-16	5.59161e-15
		4.81	-1.0502e-15	2.86754e-15	-5.35757e-15	5.09445e-15
		4.83	-4.52772e-15	3.70899e-15	-7.33204e-15	3.67219e-15
		4.85	-1.42695e-15	2.39032e-15	-3.32074e-15	5.38802e-15
		4.87	-1.0115e-14	4.48798e-15	-3.65378e-15	5.20324e-15
		4.89	-7.24282e-15	2.04053e-15	-2.77271e-15	5.62851e-15
		4.91	-3.01942e-15	3.24922e-15	-8.01959e-15	4.55088e-15
		4.93	-2.66554e-15	1.79092e-15	-5.21676e-15	4.31015e-15
		4.95	-5.79046e-16	2.64399e-15	-9.69733e-15	3.62661e-15
		4.97	-1.81936e-15	1.84306e-15	-5.87031e-15	5.03982e-15
		4.99	6.79236e-16	3.22437e-15	-5.38314e-15	2.01534e-15
		5.01	-2.4074e-15	4.58789e-15	-2.54089e-15	4.13883e-15
		5.03	-1.82679e-15	1.49497e-15	-3.13046e-15	5.9521e-15
		5.05	2.53744e-15	4.53721e-15	-8.45002e-15	4.58632e-15
		5.07	6.29251e-16	2.41342e-15	-1.06694e-14	3.56482e-15
		5.09	1.3833e-15	3.96236e-15	-1.02795e-14	3.8529e-15
		5.11	-2.6038e-15	2.10711e-15	-4.88405e-15	4.32661e-15
		5.13	1.44788e-15	4.15923e-15	-1.10977e-14	4.41242e-15
		5.15	-1.24138e-15	2.31869e-15	-1.05641e-14	3.88428e-15
		5.17	2.58639e-15	1.62628e-15	-7.66645e-15	3.85642e-15
		5.19	2.08003e-17	3.63464e-15	-9.74942e-15	4.57031e-15
		5.21	-1.70284e-15	1.83458e-15	-6.06853e-15	4.18666e-15
		5.23	-5.22623e-15	2.37114e-15	-6.37424e-15	4.08253e-15
		5.25	-8.19674e-16	1.62367e-15	-7.35302e-15	4.43928e-15
		5.27	-4.43971e-15	5.83747e-15	-7.86525e-15	2.81848e-15
		5.29	-7.39694e-15	6.88883e-15	-4.73942e-15	3.69839e-15
		5.31	-1.01181e-15	3.2189e-15	-3.2187e-15	2.34134e-15
		5.33	-3.41259e-15	2.21718e-15	-6.37122e-15	2.70576e-15
		5.35	1.55855e-15	3.50905e-15	-7.87866e-15	3.01615e-15
		5.37	-7.69038e-15	5.4867e-15	-7.56109e-15	4.74639e-15
		5.39	1.41614e-15	3.99249e-15	-6.02692e-15	3.77661e-15
		5.41	2.70593e-15	5.5992e-15	-3.12264e-15	3.08378e-15
		5.43	-6.66207e-15	2.48828e-15	-8.67949e-15	3.1066e-15
		5.45	-1.00334e-14	5.80012e-15	-1.03042e-14	5.86849e-15
		5.47	-1.32092e-14	7.22203e-15	-1.25945e-14	3.23031e-15
		5.49	-6.83483e-15	1.64395e-15	-1.35201e-14	3.60514e-15
		5.51	-4.93484e-15	4.73141e-15	-1.30298e-14	3.57226e-15
		5.53	-8.92306e-15	2.48435e-15	-1.09633e-14	4.02825e-15
		5.55	-1.18432e-14	5.81929e-15	-7.92961e-15	3.40842e-15
		5.57	-4.54968e-15	3.39331e-15	-1.36638e-14	4.65482e-15
		5.59	-5.84787e-15	2.84176e-15	-1.45731e-14	4.60205e-15
		5.61	-6.75759e-15	5.12375e-15	-6.37144e-15	3.75389e-15
		5.63	-9.79974e-15	5.56432e-15	-9.61535e-15	3.38213e-15
		5.65	-3.64726e-15	4.59043e-15	-1.11646e-14	3.37714e-15
		5.67	-6.82707e-15	7.97083e-15	-5.98957e-15	2.44912e-15
		5.69	-1.09089e-14	6.81017e-15	-1.29757e-14	3.23347e-15
		5.71	-3.94083e-15	2.44391e-15	-1.25806e-14	5.07588e-15
		5.73	-1.07143e-14	4.08562e-15	-9.64754e-15	5.0363e-15
		5.75	-7.77727e-15	5.45133e-15	-1.53868e-14	5.16801e-15
		5.77	-5.07875e-15	3.0618e-15	-8.15343e-15	4.14755e-15
		5.79	-7.03491e-15	2.23645e-15	-1.06658e-14	4.71094e-15
		5.81	1.66724e-15	5.39841e-15	-8.006e-15	5.13076e-15
		5.83	-5.96387e-15	2.15672e-15	-5.64966e-15	4.74903e-15
		5.85	-8.66716e-15	4.82583e-15	-1.09261e-14	6.41837e-15
		5.87	-1.12705e-14	3.66705e-15	-1.0809e-14	4.38159e-15
		5.89	-4.28355e-15	3.12131e-15	-9.79466e-15	2.25853e-15
		5.91	-6.33174e-15	2.99992e-15	-1.05546e-14	6.42627e-15
		5.93	-8.48856e-16	2.8013e-15	-8.1892e-15	5.44219e-15
		5.95	-5.83968e-15	2.28907e-15	-1.40807e-14	5.74404e-15
		5.97	-9.47773e-15	6.34756e-15	-1.14159e-14	3.84042e-15
		5.99	-3.68164e-15	2.72014e-15	-7.53147e-15	3.05887e-15
		6.01	-2.02801e-15	2.73802e-15	-9.07132e-15	3.14303e-15
		6.03	-4.56431e-15	2.96777e-15	-6.62981e-15	3.266e-15
		6.05	-2.11012e-15	3.0779e-15	-5.12138e-15	3.25514e-15
		6.07	-2.63687e-15	3.60865e-15	-1.1369e-14	5.83683e-15
		6.09	-3.65163e-15	2.86154e-15	-1.27153e-14	3.33484e-15
		6.11	-9.29791e-16	2.30983e-15	-6.92836e-15	4.45295e-15
		6.13	-2.70084e-15	2.82211e-15	-1.08178e-14	4.85109e-15
		6.15	-2.57154e-15	4.68923e-15	-1.39087e-14	6.11163e-15
		6.17	-4.49062e-15	2.03524e-15	-9.55611e-15	5.28771e-15
		6.19	1.52115e-15	3.10329e-15	-1.12759e-14	5.58456e-15
		6.21	-4.45509e-15	3.67012e-15	-7.93494e-15	4.85208e-15
		6.23	3.75788e-17	2.67025e-15	-1.30233e-14	6.67962e-15
		6.25	4.20392e-15	4.5257e-15	-3.07667e-15	4.74437e-15
		6.27	-1.60904e-15	4.96092e-15	2.47662e-15	4.31947e-15
		6.29	9.73978e-16	3.48596e-15	-6.0785e-15	5.63648e-15
		6.31	1.28277e-15	3.11953e-15	-6.30328e-15	3.16775e-15
		6.33	-4.68727e-15	4.91258e-15	-1.11144e-14	6.63505e-15
		6.35	-3.11161e-15	3.63401e-15	-1.20543e-14	4.33859e-15
		6.37	1.37576e-15	5.49671e-15	-1.00046e-14	5.09693e-15
		6.39	-1.93945e-15	4.36964e-15	-8.45562e-15	5.7717e-15
		6.41	-3.3817e-15	3.23466e-15	-9.46225e-15	4.8897e-15
		6.43	-4.72199e-15	2.31769e-15	-5.5623e-15	4.91162e-15
		6.45	-3.17516e-15	4.17406e-15	-2.49551e-15	3.95585e-15
		6.47	-6.1437e-16	3.19044e-15	-8.53562e-15	3.80057e-15
		6.49	-4.56124e-15	4.6716e-15	-1.00549e-14	5.00923e-15
		6.51	-4.05756e-15	7.63889e-15	-8.53687e-15	3.91894e-15
		6.53	-6.17867e-15	4.255e-15	-1.28796e-14	5.79222e-15
		6.55	-7.22809e-15	7.79255e-15	-7.7672e-15	3.42253e-15
		6.57	-2.02878e-15	4.24617e-15	-2.689e-15	2.48151e-15
		6.59	-2.79148e-15	5.37455e-15	-6.16078e-15	3.89432e-15
		6.61	-1.5116e-15	4.12248e-15	-8.5556e-15	7.70856e-15
		6.63	-1.09482e-14	4.24089e-15	-5.75539e-15	4.22982e-15
		6.65	-1.013e-14	7.97545e-15	-5.45211e-16	5.12338e-15
		6.67	-5.54384e-15	4.06858e-15	-7.18072e-15	5.66201e-15
		6.69	1.27063e-15	3.00562e-15	-5.83061e-15	6.31641e-15
		6.71	-2.62324e-15	3.98427e-15	-8.9756e-15	3.52112e-15
		6.73	8.39725e-16	4.1981e-15	7.91488e-16	2.00564e-15
		6.75	-1.03459e-15	3.37682e-15	-2.54403e-15	4.49007e-15
		6.77	-4.99834e-15	5.03054e-15	1.76729e-15	4.0439e-15
		6.79	-6.24562e-15	6.38417e-15	-3.08436e-15	3.83638e-15
		6.81	-4.50282e-15	4.42345e-15	-5.53828e-15	3.53257e-15
		6.83	7.56294e-16	4.22996e-15	-5.62303e-15	3.82637e-15
		6.85	-3.6078e-15	3.12434e-15	-3.84823e-15	3.87516e-15
		6.87	-3.3776e-15	6.14221e-15	-6.66562e-15	3.91939e-15
		6.89	2.36564e-15	5.75037e-15	-3.16926e-15	2.25206e-15
		6.91	9.5067e-16	2.05633e-15	-6.6675e-15	3.17318e-15
		6.93	-3.49986e-15	4.52285e-15	-4.74083e-15	3.95484e-15
		6.95	-2.39836e-15	3.51052e-15	-4.22473e-15	2.7889e-15
		6.97	6.22947e-16	2.81224e-15	-3.64714e-15	5.66171e-15
		6.99	-7.71556e-15	6.3252e-15	-5.74269e-15	3.0211e-15
		7.01	-1.17724e-14	1.01769e-14	3.51897e-16	5.78179e-15
		7.03	3.1335e-15	2.90042e-15	-2.73742e-15	3.00388e-15
		7.05	-5.14465e-15	3.48324e-15	-7.37681e-15	2.8587e-15
		7.07	1.17731e-17	4.37056e-15	-4.7158e-15	2.87417e-15
		7.09	-7.82558e-17	5.84233e-15	-7.38204e-16	2.70399e-15
		7.11	-2.42813e-15	4.41428e-15	-1.33982e-15	5.4658e-15
		7.13	3.78588e-18	5.16178e-15	-4.05238e-15	4.29589e-15
		7.15	6.94144e-17	2.61507e-15	-1.42462e-15	1.99652e-15
		7.17	-9.8768e-15	6.1498e-15	-4.60843e-15	4.56177e-15
		7.19	1.99911e-15	2.89486e-15	-3.62443e-15	2.82712e-15
		7.21	-2.7371e-15	4.40083e-15	-4.59967e-15	4.22211e-15
		7.23	6.83757e-16	4.19518e-15	-5.09795e-15	2.78064e-15
		7.25	-1.28584e-15	2.69759e-15	-2.37143e-15	2.92898e-15
		7.27	-1.11827e-15	3.44888e-15	-9.9367e-15	5.54998e-15
		7.29	9.5069e-16	5.0914e-15	-6.25617e-15	3.4591e-15
		7.31	-3.38799e-16	3.01799e-15	-7.3226e-15	2.71952e-15
		7.33	8.24838e-16	4.1824e-15	-2.17049e-15	2.68997e-15
		7.35	-2.70978e-15	3.43774e-15	2.07153e-15	3.0767e-15
		7.37	-4.24002e-15	4.88932e-15	-7.2379e-16	5.67689e-15
		7.39	-3.51783e-15	5.1082e-15	-9.62913e-15	5.09748e-15
		7.41	-3.22232e-15	3.06335e-15	-5.53697e-15	4.64374e-15
		7.43	-5.05479e-15	4.94442e-15	-3.6132e-15	3.46308e-15
		7.45	2.15706e-15	4.90496e-15	-5.30265e-15	5.4656e-15
		7.47	-2.54278e-15	4.48986e-15	-4.26108e-15	4.3348e-15
		7.49	-2.49955e-15	4.45157e-15	-1.84928e-15	2.90949e-15
		7.51	-1.13694e-15	3.75933e-15	-3.04899e-16	4.05997e-15
		7.53	-4.95674e-15	6.29113e-15	2.00522e-15	4.17123e-15
		7.55	-6.8712e-16	3.65567e-15	-2.66699e-15	3.93488e-15
		7.57	1.91659e-15	2.90415e-15	3.11249e-15	3.76439e-15
		7.59	-2.22838e-15	3.53778e-15	-6.69747e-16	3.92969e-15
		7.61	-3.20871e-15	3.40949e-15	-6.16245e-16	4.3638e-15
		7.63	-5.33184e-15	4.2728e-15	1.16943e-15	4.63656e-15
		7.65	4.68443e-17	4.55541e-15	-1.45444e-15	6.05706e-15
		7.67	-4.79263e-15	3.554e-15	4.97359e-16	4.39195e-15
		7.69	-1.0428e-15	4.60681e-15	-3.48397e-16	4.20098e-15
		7.71	-2.73663e-15	2.03085e-15	-1.21752e-15	2.01805e-15
		7.73	-2.54821e-15	5.36277e-15	-5.30132e-15	5.93865e-15
		7.75	-3.35064e-15	3.48187e-15	3.05878e-15	2.97719e-15
		7.77	-2.05037e-15	3.41871e-15	-4.56315e-15	4.15411e-15
		7.79	-8.84947e-16	3.30835e-15	-2.38913e-15	4.43653e-15
		7.81	-8.55981e-15	8.20033e-15	-1.3895e-15	4.74103e-15
		7.83	-1.06454e-15	2.15567e-15	-2.99937e-15	4.20325e-15
		7.85	-9.6628e-15	1.01542e-14	-6.8874e-15	5.24812e-15
		7.87	-9.06902e-15	6.68542e-15	-1.12777e-14	6.92755e-15
		7.89	-9.70043e-15	9.59034e-15	-1.65068e-15	3.68716e-15
		7.91	-1.43323e-14	1.44192e-14	-3.4286e-15	4.92967e-15
		7.93	-1.1392e-14	1.21784e-14	-3.21534e-15	4.38438e-15
		7.95	-1.21795e-14	1.53746e-14	-4.62316e-15	4.05881e-15
		7.97	-1.02678e-14	1.22002e-14	-1.23976e-15	6.08747e-15
		7.99	-1.42216e-14	1.49684e-14	2.13222e-15	2.07413e-15
		8.01	-1.11784e-14	1.11037e-14	-5.31039e-15	3.76404e-15
		8.03	-6.96536e-15	9.43265e-15	-8.99211e-16	5.67257e-15
		8.05	-1.10037e-14	1.15726e-14	4.167e-16	2.63508e-15
		8.07	-1.26127e-14	1.10405e-14	2.01697e-15	4.04477e-15
		8.09	1.24916e-15	5.01335e-15	-2.59219e-15	4.09089e-15
		8.11	1.86256e-15	2.4227e-15	-2.15587e-15	4.07377e-15
		8.13	1.40034e-15	4.25354e-15	3.1422e-15	3.40248e-15
		8.15	3.73989e-16	4.99945e-15	2.66467e-16	3.41306e-15
		8.17	-2.10197e-15	3.10656e-15	-1.02283e-15	3.98738e-15
		8.19	-3.96919e-15	3.03778e-15	4.50022e-15	2.91892e-15
		8.21	-3.97309e-15	4.07023e-15	6.94875e-16	2.64978e-15
		8.23	-4.0367e-15	2.84045e-15	1.4281e-15	3.04219e-15
		8.25	-3.98658e-15	2.4922e-15	-8.6019e-16	5.13244e-15
		8.27	-6.58648e-15	4.80478e-15	1.16765e-15	2.61393e-15
		8.29	-2.92667e-15	2.54898e-15	-5.28529e-15	4.82849e-15
		8.31	-3.25217e-15	3.20797e-15	-4.00773e-15	6.11705e-15
		8.33	-5.48905e-15	4.63443e-15	-2.68035e-15	3.16972e-15
		8.35	-7.26117e-15	2.74294e-15	-6.18962e-15	7.38667e-15
		8.37	-9.87925e-15	7.22464e-15	-1.33099e-15	6.87617e-15
		8.39	-8.49001e-15	9.55573e-15	7.60639e-16	6.07276e-15
		8.41	-5.72064e-15	3.49216e-15	-4.89705e-15	8.0967e-15
		8.43	-4.02191e-15	2.40098e-15	1.87e-15	6.61264e-15
		8.45	-8.60709e-15	2.60943e-15	-5.75739e-16	3.88039e-15
		8.47	-3.41019e-16	2.34399e-15	-4.9461e-15	4.26222e-15
		8.49	-4.04438e-15	4.13301e-15	3.95477e-15	6.13493e-15
		8.51	-2.66447e-15	1.57263e-15	-8.50412e-15	6.15065e-15
		8.53	-2.35135e-15	2.1205e-15	-8.1361e-16	4.39189e-15
		8.55	2.3501e-15	2.69763e-15	2.70482e-15	5.13882e-15
		8.57	2.47061e-15	5.38492e-15	5.10254e-15	4.41647e-15
		8.59	1.39042e-15	3.22321e-15	-7.74554e-16	5.17544e-15
		8.61	-7.55483e-15	7.80821e-15	9.92797e-16	6.73768e-15
		8.63	-1.42724e-15	2.298e-15	4.80222e-15	4.04901e-15
		8.65	-7.78227e-15	5.4764e-15	6.0623e-15	5.75763e-15
		8.67	-1.07871e-14	7.98684e-15	3.75966e-15	5.52026e-15
		8.69	-6.90039e-15	5.71411e-15	3.87785e-15	4.10178e-15
		8.71	-8.75015e-15	4.31425e-15	-1.9365e-15	5.65424e-15
		8.73	-1.0867e-14	8.10972e-15	3.7893e-15	7.82001e-15
		8.75	-1.14088e-14	4.6983e-15	4.42374e-15	5.81511e-15
		8.77	-1.02648e-14	5.92508e-15	1.40675e-15	6.38316e-15
		8.79	-9.71173e-15	7.33908e-15	5.3391e-15	4.70172e-15
		8.81	-1.29166e-14	6.5629e-15	1.35414e-15	4.57206e-15
		8.83	-1.13242e-14	7.12717e-15	3.06906e-15	4.97636e-15
		8.85	-1.15286e-14	5.9358e-15	-1.66249e-15	6.93235e-15
		8.87	-1.18491e-14	7.26716e-15	1.88863e-15	7.97828e-15
		8.89	-1.1407e-14	8.73101e-15	3.28596e-16	5.30732e-15
		8.91	-6.87261e-15	5.68308e-15	-3.61898e-15	5.71406e-15
		8.93	-1.20697e-14	7.71525e-15	4.00448e-15	5.1603e-15
		8.95	-1.31267e-14	5.61764e-15	-2.15552e-15	7.0272e-15
		8.97	-1.19277e-14	6.66029e-15	-1.27189e-15	6.26963e-15
		8.99	-1.24789e-14	6.85695e-15	-1.33209e-15	5.39525e-15
		9.01	-1.38594e-14	6.0978e-15	-1.29935e-15	6.62897e-15
		9.03	-9.27249e-15	5.08849e-15	-6.14383e-16	3.70378e-15
		9.05	-1.32874e-14	4.82747e-15	-2.76928e-15	5.37948e-15
		9.07	-1.35297e-14	5.3751e-15	3.20419e-15	5.94917e-15
		9.09	2.19716e-15	8.64237e-15	9.10372e-16	4.26676e-15
		9.11	-4.45285e-15	6.64628e-15	1.54532e-15	3.82443e-15
		9.13	-6.57861e-15	5.50081e-15	-3.40935e-15	6.53955e-15
		9.15	-7.20286e-15	4.29598e-15	-1.11505e-15	7.80565e-15
		9.17	-8.0439e-15	3.97777e-15	8.99143e-15	4.87297e-15
		9.19	-1.09732e-14	4.82509e-15	6.2557e-15	4.40986e-15
		9.21	-1.02407e-14	4.79952e-15	4.52325e-15	3.29697e-15
		9.23	-1.13384e-14	6.51559e-15	2.64724e-15	5.18974e-15
		9.25	-1.08683e-14	4.87327e-15	5.39018e-15	4.08771e-15
		9.27	-9.93243e-15	5.99347e-15	6.66652e-15	4.57101e-15
		9.29	-4.4472e-15	3.18752e-15	3.22065e-15	5.23859e-15
		9.31	-1.23446e-14	3.98118e-15	3.44853e-15	6.16677e-15
		9.33	-9.36888e-15	4.66707e-15	5.75003e-15	3.39464e-15
		9.35	-1.18575e-14	6.07749e-15	3.83123e-15	5.78337e-15
		9.37	-8.15103e-15	4.04074e-15	-2.89404e-16	4.6959e-15
		9.39	-1.26499e-14	6.21582e-15	4.74095e-15	5.40153e-15
		9.41	-1.51406e-14	8.39121e-15	7.07764e-15	6.24557e-15
		9.43	-8.29936e-15	6.94027e-15	4.4139e-15	8.5697e-15
		9.45	-8.59013e-15	4.37921e-15	3.88555e-15	8.53284e-15
		9.47	-8.95594e-15	6.73359e-15	4.72033e-15	5.31287e-15
		9.49	-9.03144e-15	5.53308e-15	2.71452e-15	6.81184e-15
		9.51	-4.40944e-15	5.62691e-15	3.36997e-15	6.2189e-15
		9.53	-1.24421e-14	7.38669e-15	5.85883e-15	7.17878e-15
		9.55	-2.97588e-15	6.94072e-15	-3.11616e-15	9.40778e-15
		9.57	-1.02787e-14	4.49616e-15	5.19592e-15	6.20018e-15
		9.59	-5.11228e-15	7.31194e-15	1.24626e-15	6.13155e-15
		9.61	-2.10754e-15	5.21851e-15	-1.22674e-16	6.07986e-15
		9.63	-1.08714e-14	8.00546e-15	2.52833e-15	4.67671e-15
		9.65	-1.05355e-14	5.56715e-15	-2.35767e-15	5.17013e-15
		9.67	-7.84092e-15	5.7449e-15	-1.10607e-15	5.97635e-15
		9.69	-7.5394e-15	4.53022e-15	3.46167e-15	5.72921e-15
		9.71	-8.52542e-15	5.24868e-15	4.15506e-15	7.92728e-15
		9.73	-1.11444e-15	7.23072e-15	5.58806e-15	5.94959e-15
		9.75	-5.11673e-15	4.81541e-15	1.07648e-15	5.27532e-15
		9.77	-6.63031e-15	4.27058e-15	-1.13289e-15	7.10856e-15
		9.79	-6.3078e-15	5.39518e-15	-4.10315e-15	7.67968e-15
		9.81	-5.32846e-15	6.74267e-15	6.19991e-15	5.33927e-15
		9.83	4.48207e-16	1.18642e-14	4.91643e-15	6.5428e-15
		9.85	-1.09208e-14	6.49987e-15	1.09087e-15	5.75096e-15
		9.87	-8.75189e-15	5.67917e-15	5.00414e-15	6.28533e-15
		9.89	-4.52253e-15	5.56735e-15	8.72458e-15	7.92615e-15
		9.91	-1.65128e-14	5.84366e-15	8.11883e-15	4.66238e-15
		9.93	-1.17655e-14	5.29947e-15	9.37151e-15	3.72055e-15
		9.95	-1.02456e-14	6.85142e-15	5.40768e-15	7.15327e-15
		9.97	9.12773e-16	1.07248e-14	7.62622e-15	5.63166e-15
		9.99	-3.44858e-15	6.81859e-15	3.05121e-15	5.13149e-15
		10.01
		10.03
		10.05
		10.07
		10.09
		10.11
		10.13
		10.15
		10.17
		10.19
		10.21
		10.23
		10.25
		10.27
		10.29	5.05672e-13	4.85196e-14	3.24023e-13	2.31547e-14
		10.31	4.82383e-13	4.56592e-14	3.03656e-13	2.15294e-14
		10.33	4.81342e-13	4.59615e-14	3.00596e-13	2.28544e-14
		10.35	4.77557e-13	4.68246e-14	2.98918e-13	1.96593e-14
		10.37	4.79278e-13	4.65972e-14	2.91564e-13	2.4063e-14
		10.39	4.7398e-13	4.68246e-14	2.86839e-13	2.48149e-14
		10.41	4.84601e-13	4.81386e-14	2.89174e-13	2.2539e-14
		10.43	4.79525e-13	4.76713e-14	2.89832e-13	2.2497e-14
		10.45	4.7895e-13	4.70949e-14	2.91027e-13	2.12475e-14
		10.47	4.7976e-13	4.98649e-14	2.8668e-13	2.30111e-14
		10.49	4.75772e-13	4.99601e-14	2.88721e-13	2.2424e-14
		10.51	4.66899e-13	5.07078e-14	2.84593e-13	2.3276e-14
		10.53	4.622e-13	5.22155e-14	2.91363e-13	2.28126e-14
		10.55	4.62389e-13	5.20429e-14	2.84779e-13	2.20424e-14
		10.57	4.64129e-13	5.31001e-14	2.81069e-13	2.1477e-14
		10.59	4.66297e-13	5.29383e-14	2.78454e-13	2.18012e-14
		10.61	4.70242e-13	5.51462e-14	2.80668e-13	2.08692e-14
		10.63	4.70392e-13	5.55901e-14	2.83777e-13	2.23632e-14
		10.65	4.70801e-13	5.47227e-14	2.82559e-13	2.04569e-14
		10.67	4.65582e-13	5.65973e-14	2.7765e-13	2.06025e-14
		10.69	4.61498e-13	5.4735e-14	2.81022e-13	2.63773e-14
		10.71	4.69589e-13	5.52867e-14	2.76617e-13	2.4298e-14
		10.73	4.68099e-13	5.45339e-14	2.83155e-13	1.91518e-14
		10.75	4.61922e-13	5.55394e-14	2.76707e-13	2.04944e-14
		10.77	4.63158e-13	5.54802e-14	2.82084e-13	1.96709e-14
		10.79	4.64831e-13	5.66462e-14	2.83841e-13	2.18566e-14
		10.81	4.54022e-13	5.47486e-14	2.80933e-13	2.18306e-14
		10.83	4.61294e-13	5.65657e-14	2.8377e-13	2.03034e-14
		10.85	4.6321e-13	5.69901e-14	2.82147e-13	2.28872e-14
		10.87	4.59697e-13	5.42061e-14	2.80663e-13	2.19138e-14
		10.89	4.62361e-13	5.59405e-14	2.74827e-13	2.0453e-14
		10.91	4.5857e-13	5.60507e-14	2.72459e-13	2.25568e-14
		10.93	4.57994e-13	5.48049e-14	2.81664e-13	1.94913e-14
		10.95	4.54179e-13	5.76614e-14	2.80174e-13	2.00741e-14
		10.97	4.5682e-13	5.72863e-14	2.79624e-13	2.24727e-14
		10.99	4.58786e-13	5.93639e-14	2.79762e-13	2.034e-14
		11.01	4.61754e-13	5.76701e-14	2.76841e-13	2.26838e-14
		11.03	4.59035e-13	5.76132e-14	2.75552e-13	2.30691e-14
		11.05	4.5534e-13	5.80963e-14	2.77151e-13	2.1063e-14
		11.07	4.54785e-13	5.76095e-14	2.76561e-13	2.15e-14
		11.09	4.56499e-13	5.80783e-14	2.74192e-13	2.0996e-14
		11.11	4.48615e-13	5.76557e-14	2.68761e-13	2.34983e-14
		11.13	4.48627e-13	5.68897e-14	2.73812e-13	1.90769e-14
		11.15	4.46157e-13	5.88685e-14	2.73649e-13	1.92711e-14
		11.17	4.48497e-13	5.79848e-14	2.66667e-13	2.03887e-14
		11.19	4.55653e-13	5.83524e-14	2.75286e-13	1.87539e-14
		11.21	4.39455e-13	5.67098e-14	2.71057e-13	1.98554e-14
		11.23
		11.25
		11.27
		11.29	8.45403e-13	8.61224e-14	5.07041e-13	3.54903e-14
		11.31	8.41167e-13	8.80784e-14	5.01292e-13	4.18465e-14
		11.33	8.41249e-13	9.04266e-14	4.94071e-13	3.86104e-14
		11.35	8.4497e-13	9.13358e-14	4.96704e-13	4.28487e-14
		11.37	8.41073e-13	8.83398e-14	4.92435e-13	3.98518e-14
		11.39	8.43062e-13	8.98126e-14	4.87554e-13	3.97651e-14
		11.41	8.4321e-13	9.10698e-14	4.90435e-13	4.14271e-14
		11.43	8.3539e-13	8.88136e-14	4.95179e-13	4.32283e-14
		11.45	8.36565e-13	9.04768e-14	4.92083e-13	3.95246e-14
		11.47	8.36853e-13	9.03419e-14	4.90783e-13	4.123e-14
		11.49	8.31479e-13	9.17053e-14	4.85518e-13	4.154e-14
		11.51	8.34693e-13	9.17578e-14	4.90231e-13	4.21738e-14
		11.53	8.34553e-13	9.29724e-14	4.83973e-13	4.29903e-14
		11.55	8.3356e-13	9.28382e-14	4.83766e-13	4.33652e-14
		11.57	8.26565e-13	9.33504e-14	4.87036e-13	4.0792e-14
		11.59	8.3264e-13	9.3208e-14	4.85209e-13	4.43136e-14
		11.61	8.25237e-13	9.3068e-14	4.86751e-13	4.41754e-14
		11.63	8.23278e-13	9.44405e-14	4.80754e-13	4.16385e-14
		11.65	8.26962e-13	9.47647e-14	4.83908e-13	4.53214e-14
		11.67	8.25488e-13	9.33413e-14	4.86076e-13	4.39479e-14
		11.69	8.22234e-13	9.26551e-14	4.84695e-13	4.39658e-14
		11.71	8.24759e-13	9.42454e-14	4.84849e-13	4.41209e-14
		11.73	8.20376e-13	9.44134e-14	4.85349e-13	4.50573e-14
		11.75	8.25569e-13	9.44841e-14	4.82445e-13	4.14635e-14
		11.77	8.16711e-13	9.43319e-14	4.75819e-13	4.16146e-14
		11.79	8.193e-13	9.45398e-14	4.77225e-13	4.32522e-14
		11.81	8.15413e-13	9.55918e-14	4.78968e-13	4.24484e-14
		11.83	8.17651e-13	9.59461e-14	4.74741e-13	4.33452e-14
		11.85	8.16206e-13	9.57186e-14	4.77762e-13	3.99151e-14
		11.87	8.07206e-13	9.4012e-14	4.71176e-13	4.0315e-14
		11.89	8.06939e-13	9.40773e-14	4.70131e-13	4.20545e-14
		11.91	8.0576e-13	9.4479e-14	4.7425e-13	4.10545e-14
		11.93	8.05246e-13	9.41226e-14	4.78891e-13	4.302e-14
		11.95	8.0417e-13	9.52953e-14	4.78519e-13	4.08586e-14
		11.97	8.03525e-13	9.21425e-14	4.77306e-13	4.37987e-14
		11.99	8.04177e-13	9.33348e-14	4.77993e-13	4.13986e-14
		12.01	7.97304e-13	9.03507e-14	4.75245e-13	3.91636e-14
		12.03	7.96305e-13	9.27346e-14	4.75454e-13	4.20079e-14
		12.05	7.95949e-13	9.30853e-14	4.77541e-13	4.26487e-14
		12.07	7.90266e-13	9.08424e-14	4.77178e-13	4.05607e-14
		12.09	7.90358e-13	9.26005e-14	4.70236e-13	4.19164e-14
		12.11	7.93844e-13	9.31949e-14	4.70186e-13	4.01547e-14
		12.13	7.87366e-13	9.27533e-14	4.76354e-13	4.19833e-14
		12.15	7.93288e-13	9.1864e-14	4.70433e-13	4.05242e-14
		12.17	7.83103e-13	9.1974e-14	4.68751e-13	4.15523e-14
		12.19	7.84491e-13	9.22932e-14	4.70898e-13	4.26425e-14
		12.21	7.84435e-13	9.26327e-14	4.69092e-13	4.35731e-14
		12.23
		12.25
		12.27
		12.29	1.16138e-12	1.09845e-13	7.06882e-13	5.87306e-14
		12.31	1.14553e-12	1.14174e-13	7.02825e-13	6.05819e-14
		12.33	1.14413e-12	1.1289e-13	6.92438e-13	5.95148e-14
		12.35	1.14982e-12	1.13808e-13	6.92906e-13	6.31491e-14
		12.37	1.14957e-12	1.1335e-13	6.92263e-13	6.46951e-14
		12.39	1.14742e-12	1.14654e-13	6.90407e-13	6.44295e-14
		12.41	1.14267e-12	1.16839e-13	6.98606e-13	6.62262e-14
		12.43	1.14134e-12	1.15859e-13	6.94687e-13	6.48813e-14
		12.45	1.13827e-12	1.15566e-13	6.95558e-13	6.43775e-14
		12.47	1.13851e-12	1.16584e-13	6.91066e-13	6.39878e-14
		12.49	1.13665e-12	1.15442e-13	6.90941e-13	6.83927e-14
		12.51	1.13719e-12	1.16806e-13	6.88869e-13	6.63176e-14
		12.53	1.13606e-12	1.1788e-13	6.88159e-13	6.51567e-14
		12.55	1.13369e-12	1.15365e-13	6.88491e-13	6.71549e-14
		12.57	1.13093e-12	1.16498e-13	6.87203e-13	6.52078e-14
		12.59	1.1343e-12	1.19558e-13	6.8706e-13	6.77837e-14
		12.61	1.12417e-12	1.16816e-13	6.8793e-13	6.76514e-14
		12.63	1.12026e-12	1.16387e-13	6.8625e-13	6.47253e-14
		12.65	1.1161e-12	1.15786e-13	6.81658e-13	6.74312e-14
		12.67	1.12396e-12	1.18976e-13	6.86998e-13	6.35532e-14
		12.69	1.11598e-12	1.17843e-13	6.81977e-13	6.50787e-14
		12.71	1.11319e-12	1.165e-13	6.83867e-13	6.69392e-14
		12.73	1.11083e-12	1.17019e-13	6.88161e-13	6.39115e-14
		12.75	1.10833e-12	1.16062e-13	6.82891e-13	6.5371e-14
		12.77	1.10669e-12	1.1639e-13	6.83147e-13	6.57199e-14
		12.79	1.10786e-12	1.17064e-13	6.77589e-13	6.76412e-14
		12.81	1.10424e-12	1.16378e-13	6.81571e-13	6.6054e-14
		12.83	1.09738e-12	1.16176e-13	6.78803e-13	6.62772e-14
		12.85	1.09001e-12	1.1621e-13	6.75989e-13	6.88724e-14
		12.87	1.09294e-12	1.15794e-13	6.76551e-13	6.52928e-14
		12.89	1.08951e-12	1.16217e-13	6.77587e-13	6.43963e-14
		12.91	1.08561e-12	1.15854e-13	6.76121e-13	6.65722e-14
		12.93	1.08919e-12	1.14728e-13	6.69891e-13	6.45512e-14
		12.95	1.08437e-12	1.16113e-13	6.8007e-13	6.77911e-14
		12.97	1.07615e-12	1.15607e-13	6.70645e-13	6.71728e-14
		12.99	1.07705e-12	1.15997e-13	6.70322e-13	6.88389e-14
		13.01	1.08378e-12	1.16415e-13	6.71124e-13	6.37605e-14
		13.03	1.0755e-12	1.16294e-13	6.71817e-13	6.61199e-14
		13.05	1.07006e-12	1.1541e-13	6.7059e-13	6.51249e-14
		13.07	1.07559e-12	1.15936e-13	6.7029e-13	6.82469e-14
		13.09	1.06591e-12	1.16008e-13	6.61274e-13	6.40671e-14
		13.11	1.05899e-12	1.15673e-13	6.663e-13	6.60436e-14
		13.13	1.06236e-12	1.15995e-13	6.61441e-13	6.76506e-14
		13.15	1.06146e-12	1.15878e-13	6.63723e-13	6.7015e-14
		13.17	1.05552e-12	1.14937e-13	6.62455e-13	6.65027e-14
		13.19	1.05567e-12	1.14587e-13	6.61206e-13	6.89591e-14
		13.21	1.0528e-12	1.17541e-13	6.5722e-13	6.62627e-14
		13.23
		13.25
		13.27
		13.29	1.39427e-12	1.28273e-13	8.78663e-13	7.73421e-14
		13.31	1.3802e-12	1.30348e-13	8.65612e-13	7.87216e-14
		13.33	1.37854e-12	1.2931e-13	8.63757e-13	8.24917e-14
		13.35	1.40938e-12	1.26365e-13	8.70026e-13	8.26638e-14
		13.37	1.39875e-12	1.26734e-13	8.68567e-13	8.28064e-14
		13.39	1.40251e-12	1.25974e-13	8.6087e-13	8.61256e-14
		13.41	1.40573e-12	1.27746e-13	8.70072e-13	8.40184e-14
		13.43	1.38947e-12	1.30086e-13	8.67185e-13	8.42178e-14
		13.45	1.38997e-12	1.29424e-13	8.59644e-13	8.66419e-14
		13.47	1.38725e-12	1.28249e-13	8.58851e-13	8.50092e-14
		13.49	1.38255e-12	1.30081e-13	8.60954e-13	8.51249e-14
		13.51	1.38497e-12	1.29531e-13	8.5858e-13	8.61262e-14
		13.53	1.3853e-12	1.28378e-13	8.53938e-13	8.39665e-14
		13.55	1.36277e-12	1.3047e-13	8.4834e-13	8.66564e-14
		13.57	1.36143e-12	1.29524e-13	8.54606e-13	8.18827e-14
		13.59	1.36874e-12	1.29107e-13	8.55135e-13	8.33311e-14
		13.61	1.35951e-12	1.31167e-13	8.48394e-13	8.35893e-14
		13.63	1.35795e-12	1.29585e-13	8.51476e-13	8.32879e-14
		13.65	1.34454e-12	1.31765e-13	8.48079e-13	8.2713e-14
		13.67	1.3531e-12	1.2889e-13	8.44869e-13	8.36013e-14
		13.69	1.35357e-12	1.29771e-13	8.4467e-13	8.4672e-14
		13.71	1.34235e-12	1.30634e-13	8.41891e-13	8.54668e-14
		13.73	1.333e-12	1.30029e-13	8.37458e-13	8.49638e-14
		13.75	1.34131e-12	1.28792e-13	8.41476e-13	8.5909e-14
		13.77	1.33008e-12	1.31245e-13	8.35391e-13	8.51067e-14
		13.79	1.3292e-12	1.29582e-13	8.39213e-13	8.74525e-14
		13.81	1.32489e-12	1.30507e-13	8.39324e-13	8.35926e-14
		13.83	1.32463e-12	1.26677e-13	8.36044e-13	8.30356e-14
		13.85	1.33063e-12	1.28073e-13	8.3687e-13	8.39466e-14
		13.87	1.32009e-12	1.27754e-13	8.32166e-13	8.23397e-14
		13.89	1.3154e-12	1.28658e-13	8.30759e-13	8.61367e-14
		13.91	1.30628e-12	1.30241e-13	8.30263e-13	8.07541e-14
		13.93	1.3075e-12	1.30439e-13	8.35324e-13	8.35089e-14
		13.95	1.3101e-12	1.30368e-13	8.28707e-13	8.36831e-14
		13.97	1.30186e-12	1.28717e-13	8.27995e-13	8.47208e-14
		13.99	1.29965e-12	1.29136e-13	8.19959e-13	8.20673e-14
		14.01	1.29932e-12	1.28358e-13	8.23993e-13	8.23508e-14
		14.03	1.29578e-12	1.30037e-13	8.19422e-13	8.08806e-14
		14.05	1.29598e-12	1.28108e-13	8.20529e-13	8.29004e-14
		14.07	1.29476e-12	1.26597e-13	8.18266e-13	8.29565e-14
		14.09	1.2871e-12	1.25592e-13	8.18444e-13	8.05362e-14
		14.11	1.2866e-12	1.25943e-13	8.12172e-13	8.21885e-14
		14.13	1.28169e-12	1.26494e-13	8.14287e-13	7.94004e-14
		14.15	1.2868e-12	1.26608e-13	8.13886e-13	8.35446e-14
		14.17	1.27886e-12	1.26112e-13	8.10276e-13	8.03911e-14
		14.19	1.27392e-12	1.26846e-13	8.06716e-13	8.18385e-14
		14.21	1.27145e-12	1.27002e-13	8.08057e-13	8.10259e-14
		14.23
		14.25
		14.27
		14.29	1.59636e-12	1.40615e-13	1.01501e-12	9.43279e-14
		14.31	1.57873e-12	1.41543e-13	1.0077e-12	9.57085e-14
		14.33	1.57849e-12	1.41167e-13	1.00973e-12	9.45671e-14
		14.35	1.58334e-12	1.40043e-13	1.00375e-12	9.62099e-14
		14.37	1.58347e-12	1.40467e-13	1.00235e-12	9.90056e-14
		14.39	1.57623e-12	1.40743e-13	1.00368e-12	1.02633e-13
		14.41	1.57956e-12	1.39346e-13	1.00355e-12	9.98538e-14
		14.43	1.57048e-12	1.40942e-13	1.00687e-12	9.86569e-14
		14.45	1.56949e-12	1.41132e-13	1.00564e-12	9.99735e-14
		14.47	1.56771e-12	1.43418e-13	9.9934e-13	1.00374e-13
		14.49	1.56912e-12	1.40365e-13	9.95256e-13	1.00756e-13
		14.51	1.55825e-12	1.42932e-13	9.94441e-13	9.89442e-14
		14.53	1.55279e-12	1.43871e-13	9.90461e-13	1.00241e-13
		14.55	1.54922e-12	1.43384e-13	9.94628e-13	9.82904e-14
		14.57	1.54574e-12	1.4522e-13	9.90416e-13	9.7772e-14
		14.59	1.54248e-12	1.44003e-13	9.94695e-13	9.91631e-14
		14.61	1.53658e-12	1.44734e-13	9.90034e-13	9.74541e-14
		14.63	1.53178e-12	1.40995e-13	9.86007e-13	1.00312e-13
		14.65	1.5303e-12	1.43097e-13	9.80198e-13	9.92636e-14
		14.67	1.52705e-12	1.42078e-13	9.81299e-13	1.00068e-13
		14.69	1.52257e-12	1.42406e-13	9.75855e-13	1.00891e-13
		14.71	1.52117e-12	1.44255e-13	9.80409e-13	1.0032e-13
		14.73	1.51867e-12	1.4532e-13	9.77197e-13	9.88851e-14
		14.75	1.51689e-12	1.44642e-13	9.73474e-13	9.98789e-14
		14.77	1.52013e-12	1.46833e-13	9.762e-13	9.97414e-14
		14.79	1.50995e-12	1.45842e-13	9.70957e-13	1.00189e-13
		14.81	1.50369e-12	1.41145e-13	9.67001e-13	1.00546e-13
		14.83	1.49564e-12	1.42891e-13	9.68709e-13	1.00117e-13
		14.85	1.50047e-12	1.43121e-13	9.70326e-13	1.01619e-13
		14.87	1.49622e-12	1.41735e-13	9.63946e-13	1.01024e-13
		14.89	1.48529e-12	1.39371e-13	9.63207e-13	1.01553e-13
		14.91	1.48505e-12	1.41256e-13	9.64371e-13	1.00661e-13
		14.93	1.47651e-12	1.41885e-13	9.53617e-13	1.0197e-13
		14.95	1.48804e-12	1.4179e-13	9.57953e-13	9.88518e-14
		14.97	1.47411e-12	1.39698e-13	9.54982e-13	9.71924e-14
		14.99	1.47214e-12	1.39192e-13	9.56928e-13	9.9805e-14
		15.01	1.46843e-12	1.37947e-13	9.51315e-13	9.91665e-14
		15.03	1.47018e-12	1.4087e-13	9.52524e-13	1.00543e-13
		15.05	1.46312e-12	1.39545e-13	9.5065e-13	9.908e-14
		15.07	1.46409e-12	1.402e-13	9.47303e-13	9.7878e-14
		15.09	1.45771e-12	1.38214e-13	9.44135e-13	9.8429e-14
		15.11	1.4545e-12	1.38127e-13	9.4594e-13	9.74833e-14
		15.13	1.45086e-12	1.40832e-13	9.47392e-13	9.94398e-14
		15.15	1.44687e-12	1.37472e-13	9.43958e-13	1.00362e-13
		15.17	1.44178e-12	1.38731e-13	9.44673e-13	9.67993e-14
		15.19	1.43882e-12	1.3584e-13	9.41185e-13	9.75709e-14
		15.21	1.4438e-12	1.36664e-13	9.3705e-13	9.79696e-14
		15.23
		15.25
		15.27
		15.29	1.74755e-12	1.51412e-13	1.14369e-12	1.08571e-13
		15.31	1.7358e-12	1.51455e-13	1.13747e-12	1.10288e-13
		15.33	1.73759e-12	1.51511e-13	1.13243e-12	1.10084e-13
		15.35	1.73219e-12	1.52633e-13	1.13191e-12	1.12718e-13
		15.37	1.73325e-12	1.52705e-13	1.12678e-12	1.15284e-13
		15.39	1.73309e-12	1.53123e-13	1.12263e-12	1.16305e-13
		15.41	1.72597e-12	1.5526e-13	1.12257e-12	1.14604e-13
		15.43	1.72704e-12	1.53469e-13	1.12285e-12	1.17198e-13
		15.45	1.71024e-12	1.51141e-13	1.12104e-12	1.15409e-13
		15.47	1.71515e-12	1.5378e-13	1.1209e-12	1.1739e-13
		15.49	1.7135e-12	1.52248e-13	1.11617e-12	1.16128e-13
		15.51	1.70891e-12	1.5513e-13	1.11582e-12	1.14028e-13
		15.53	1.70235e-12	1.5322e-13	1.11819e-12	1.15681e-13
		15.55	1.6953e-12	1.53953e-13	1.10699e-12	1.16185e-13
		15.57	1.69042e-12	1.53236e-13	1.1082e-12	1.1512e-13
		15.59	1.6981e-12	1.53015e-13	1.10687e-12	1.16701e-13
		15.61	1.68749e-12	1.52036e-13	1.10999e-12	1.13239e-13
		15.63	1.68083e-12	1.52904e-13	1.10395e-12	1.14251e-13
		15.65	1.68082e-12	1.52926e-13	1.10325e-12	1.14563e-13
		15.67	1.67513e-12	1.52959e-13	1.0993e-12	1.17211e-13
		15.69	1.67135e-12	1.52094e-13	1.10064e-12	1.14143e-13
		15.71	1.66909e-12	1.50852e-13	1.09231e-12	1.15348e-13
		15.73	1.66427e-12	1.50763e-13	1.09503e-12	1.13155e-13
		15.75	1.6647e-12	1.52472e-13	1.0933e-12	1.14606e-13
		15.77	1.66002e-12	1.50591e-13	1.09461e-12	1.13811e-13
		15.79	1.66629e-12	1.5159e-13	1.0899e-12	1.15211e-13
		15.81	1.64991e-12	1.5182e-13	1.08891e-12	1.16565e-13
		15.83	1.64861e-12	1.51051e-13	1.0912e-12	1.1389e-13
		15.85	1.64372e-12	1.51694e-13	1.08479e-12	1.15144e-13
		15.87	1.64227e-12	1.51402e-13	1.08843e-12	1.16823e-13
		15.89	1.62971e-12	1.50173e-13	1.08609e-12	1.15336e-13
		15.91	1.62939e-12	1.49823e-13	1.08168e-12	1.15334e-13
		15.93	1.62334e-12	1.48455e-13	1.08232e-12	1.18286e-13
		15.95	1.61973e-12	1.47677e-13	1.07556e-12	1.15242e-13
		15.97	1.61492e-12	1.4831e-13	1.07335e-12	1.15913e-13
		15.99	1.61668e-12	1.48616e-13	1.06992e-12	1.13957e-13
		16.01	1.61723e-12	1.48377e-13	1.0708e-12	1.17899e-13
		16.03	1.61543e-12	1.48735e-13	1.06879e-12	1.14127e-13
		16.05	1.60655e-12	1.48495e-13	1.06987e-12	1.13877e-13
		16.07	1.61317e-12	1.47367e-13	1.06634e-12	1.15392e-13
		16.09	1.60476e-12	1.45497e-13	1.06695e-12	1.13069e-13
		16.11	1.60224e-12	1.47908e-13	1.0631e-12	1.10801e-13
		16.13	1.59807e-12	1.48259e-13	1.06262e-12	1.11422e-13
		16.15	1.59393e-12	1.47009e-13	1.0557e-12	1.12529e-13
		16.17	1.59157e-12	1.46685e-13	1.05197e-12	1.12628e-13
		16.19	1.58748e-12	1.46038e-13	1.04817e-12	1.12496e-13
		16.21	1.58381e-12	1.45947e-13	1.05238e-12	1.15322e-13
		16.23
		16.25
		16.27
		16.29	1.88228e-12	1.61268e-13	1.24398e-12	1.25084e-13
		16.31	1.88055e-12	1.62906e-13	1.24286e-12	1.25013e-13
		16.33	1.87629e-12	1.59257e-13	1.23822e-12	1.28792e-13
		16.35	1.87448e-12	1.60522e-13	1.23544e-12	1.27752e-13
		16.37	1.86955e-12	1.57864e-13	1.23827e-12	1.27907e-13
		16.39	1.86763e-12	1.5819e-13	1.23269e-12	1.28208e-13
		16.41	1.86565e-12	1.57452e-13	1.23061e-12	1.26951e-13
		16.43	1.86045e-12	1.5792e-13	1.23147e-12	1.28556e-13
		16.45	1.85525e-12	1.57752e-13	1.22968e-12	1.28762e-13
		16.47	1.84829e-12	1.60245e-13	1.22747e-12	1.30431e-13
		16.49	1.85638e-12	1.59305e-13	1.22511e-12	1.29381e-13
		16.51	1.84033e-12	1.58148e-13	1.22471e-12	1.28443e-13
		16.53	1.83924e-12	1.60231e-13	1.22117e-12	1.29548e-13
		16.55	1.83851e-12	1.60004e-13	1.21595e-12	1.31451e-13
		16.57	1.82735e-12	1.57952e-13	1.21801e-12	1.30177e-13
		16.59	1.82835e-12	1.59099e-13	1.21777e-12	1.28927e-13
		16.61	1.81281e-12	1.56771e-13	1.21546e-12	1.28582e-13
		16.63	1.81469e-12	1.57352e-13	1.20207e-12	1.28835e-13
		16.65	1.8107e-12	1.57672e-13	1.20531e-12	1.29042e-13
		16.67	1.81315e-12	1.57684e-13	1.20715e-12	1.29441e-13
		16.69	1.80309e-12	1.57692e-13	1.20486e-12	1.28889e-13
		16.71	1.79893e-12	1.56526e-13	1.20313e-12	1.28792e-13
		16.73	1.79533e-12	1.5707e-13	1.19448e-12	1.2879e-13
		16.75	1.7891e-12	1.55557e-13	1.1988e-12	1.24959e-13
		16.77	1.78771e-12	1.54908e-13	1.19292e-12	1.27133e-13
		16.79	1.78232e-12	1.55036e-13	1.18764e-12	1.26221e-13
		16.81	1.77776e-12	1.54406e-13	1.18803e-12	1.29217e-13
		16.83	1.77684e-12	1.5469e-13	1.18722e-12	1.27377e-13
		16.85	1.77073e-12	1.5354e-13	1.18831e-12	1.25969e-13
		16.87	1.77052e-12	1.535e-13	1.18887e-12	1.2692e-13
		16.89	1.76718e-12	1.53812e-13	1.17678e-12	1.28047e-13
		16.91	1.75945e-12	1.53138e-13	1.17795e-12	1.27062e-13
		16.93	1.75407e-12	1.52029e-13	1.1757e-12	1.2628e-13
		16.95	1.75168e-12	1.51228e-13	1.174e-12	1.25854e-13
		16.97	1.7484e-12	1.51838e-13	1.17204e-12	1.27912e-13
		16.99	1.73315e-12	1.49569e-13	1.17481e-12	1.26745e-13
		17.01	1.74108e-12	1.52872e-13	1.16721e-12	1.25886e-13
		17.03	1.74066e-12	1.52852e-13	1.1644e-12	1.27089e-13
		17.05	1.72277e-12	1.50344e-13	1.15953e-12	1.28453e-13
		17.07	1.72253e-12	1.51581e-13	1.16062e-12	1.28037e-13
		17.09	1.71276e-12	1.50947e-13	1.15902e-12	1.25891e-13
		17.11	1.72221e-12	1.50942e-13	1.15468e-12	1.25079e-13
		17.13	1.7174e-12	1.48787e-13	1.14869e-12	1.26088e-13
		17.15	1.71289e-12	1.49001e-13	1.14978e-12	1.27262e-13
		17.17	1.70482e-12	1.48856e-13	1.15109e-12	1.27748e-13
		17.19	1.70277e-12	1.4881e-13	1.14755e-12	1.26086e-13
		17.21	1.7029e-12	1.47466e-13	1.15201e-12	1.26349e-13
		17.23
		17.25
		17.27
		17.29	1.98397e-12	1.61842e-13	1.3415e-12	1.34572e-13
		17.31	1.98125e-12	1.64098e-13	1.33263e-12	1.3546e-13
		17.33	1.9728e-12	1.63161e-13	1.32368e-12	1.37352e-13
		17.35	1.972e-12	1.63255e-13	1.3241e-12	1.41396e-13
		17.37	1.96984e-12	1.61968e-13	1.319e-12	1.38723e-13
		17.39	1.97467e-12	1.62731e-13	1.32068e-12	1.41601e-13
		17.41	1.97271e-12	1.62627e-13	1.32224e-12	1.44103e-13
		17.43	1.96621e-12	1.62042e-13	1.31713e-12	1.40625e-13
		17.45	1.9536e-12	1.61429e-13	1.31547e-12	1.42561e-13
		17.47	1.9588e-12	1.61784e-13	1.31612e-12	1.42618e-13
		17.49	1.94615e-12	1.6016e-13	1.31106e-12	1.44044e-13
		17.51	1.94668e-12	1.61854e-13	1.30524e-12	1.44588e-13
		17.53	1.94027e-12	1.61286e-13	1.29897e-12	1.44461e-13
		17.55	1.93957e-12	1.60511e-13	1.29886e-12	1.43475e-13
		17.57	1.93585e-12	1.60599e-13	1.29913e-12	1.43182e-13
		17.59	1.93379e-12	1.60154e-13	1.29965e-12	1.4458e-13
		17.61	1.92828e-12	1.60864e-13	1.29399e-12	1.43713e-13
		17.63	1.93332e-12	1.60845e-13	1.29622e-12	1.42433e-13
		17.65	1.92258e-12	1.59832e-13	1.28702e-12	1.41574e-13
		17.67	1.92538e-12	1.60104e-13	1.28466e-12	1.42896e-13
		17.69	1.91753e-12	1.60986e-13	1.28575e-12	1.40755e-13
		17.71	1.91546e-12	1.6027e-13	1.2824e-12	1.40748e-13
		17.73	1.91353e-12	1.59077e-13	1.27978e-12	1.43002e-13
		17.75	1.89698e-12	1.57337e-13	1.27817e-12	1.40461e-13
		17.77	1.89544e-12	1.58651e-13	1.27881e-12	1.40558e-13
		17.79	1.89141e-12	1.5843e-13	1.27801e-12	1.4033e-13
		17.81	1.88711e-12	1.56769e-13	1.28067e-12	1.40302e-13
		17.83	1.88475e-12	1.56642e-13	1.27481e-12	1.40418e-13
		17.85	1.8812e-12	1.58124e-13	1.27751e-12	1.40862e-13
		17.87	1.86687e-12	1.55702e-13	1.27209e-12	1.39158e-13
		17.89	1.86932e-12	1.5692e-13	1.26879e-12	1.4246e-13
		17.91	1.85806e-12	1.55249e-13	1.26761e-12	1.38569e-13
		17.93	1.85495e-12	1.54928e-13	1.26159e-12	1.39921e-13
		17.95	1.84948e-12	1.52591e-13	1.2622e-12	1.39675e-13
		17.97	1.84498e-12	1.5381e-13	1.26372e-12	1.38094e-13
		17.99	1.84499e-12	1.53814e-13	1.2622e-12	1.3933e-13
		18.01	1.8502e-12	1.55097e-13	1.25628e-12	1.4042e-13
		18.03	1.83963e-12	1.5425e-13	1.25599e-12	1.39767e-13
		18.05	1.83879e-12	1.53193e-13	1.25019e-12	1.39516e-13
		18.07	1.8279e-12	1.53376e-13	1.24558e-12	1.39103e-13
		18.09	1.82551e-12	1.5405e-13	1.24222e-12	1.38781e-13
		18.11	1.82191e-12	1.52664e-13	1.24457e-12	1.39957e-13
		18.13	1.80914e-12	1.51787e-13	1.24266e-12	1.38922e-13
		18.15	1.81701e-12	1.51699e-13	1.23925e-12	1.40016e-13
		18.17	1.8109e-12	1.51255e-13	1.23602e-12	1.38156e-13
		18.19	1.80603e-12	1.52303e-13	1.23476e-12	1.39807e-13
		18.21	1.79565e-12	1.49276e-13	1.23238e-12	1.38926e-13
		18.23
		18.25
		18.27
		18.29	2.08619e-12	1.65909e-13	1.42191e-12	1.52458e-13
		18.31	2.07274e-12	1.67497e-13	1.41437e-12	1.51865e-13
		18.33	2.07155e-12	1.65543e-13	1.4016e-12	1.52779e-13
		18.35	2.07313e-12	1.65805e-13	1.40621e-12	1.55332e-13
		18.37	2.06973e-12	1.64846e-13	1.40614e-12	1.56682e-13
		18.39	2.07154e-12	1.63845e-13	1.39582e-12	1.54004e-13
		18.41	2.06439e-12	1.62877e-13	1.39768e-12	1.54855e-13
		18.43	2.06273e-12	1.63879e-13	1.40185e-12	1.56003e-13
		18.45	2.05985e-12	1.65198e-13	1.39469e-12	1.5489e-13
		18.47	2.05347e-12	1.65969e-13	1.39162e-12	1.53743e-13
		18.49	2.05065e-12	1.63412e-13	1.3868e-12	1.55978e-13
		18.51	2.04226e-12	1.63931e-13	1.38735e-12	1.54433e-13
		18.53	2.04567e-12	1.63815e-13	1.38394e-12	1.53609e-13
		18.55	2.03235e-12	1.63053e-13	1.38384e-12	1.5354e-13
		18.57	2.03085e-12	1.62759e-13	1.38097e-12	1.55675e-13
		18.59	2.02833e-12	1.63485e-13	1.38003e-12	1.5642e-13
		18.61	2.02415e-12	1.63615e-13	1.37454e-12	1.55831e-13
		18.63	2.0316e-12	1.6467e-13	1.3728e-12	1.50784e-13
		18.65	2.01834e-12	1.63084e-13	1.37056e-12	1.52403e-13
		18.67	2.01068e-12	1.62188e-13	1.36732e-12	1.51382e-13
		18.69	2.00812e-12	1.61637e-13	1.36516e-12	1.56121e-13
		18.71	2.00381e-12	1.60844e-13	1.36689e-12	1.5588e-13
		18.73	1.99698e-12	1.59727e-13	1.3655e-12	1.54069e-13
		18.75	1.99893e-12	1.61742e-13	1.3568e-12	1.53899e-13
		18.77	1.98879e-12	1.59744e-13	1.35233e-12	1.53071e-13
		18.79	1.9799e-12	1.59371e-13	1.34909e-12	1.536e-13
		18.81	1.98172e-12	1.61414e-13	1.35499e-12	1.52833e-13
		18.83	1.97627e-12	1.57029e-13	1.3462e-12	1.5178e-13
		18.85	1.96521e-12	1.57563e-13	1.34671e-12	1.52399e-13
		18.87	1.96468e-12	1.57295e-13	1.3394e-12	1.55052e-13
		18.89	1.96513e-12	1.57512e-13	1.33733e-12	1.51797e-13
		18.91	1.95713e-12	1.57716e-13	1.33574e-12	1.53991e-13
		18.93	1.95499e-12	1.56269e-13	1.33382e-12	1.49949e-13
		18.95	1.95388e-12	1.55365e-13	1.329e-12	1.53144e-13
		18.97	1.95007e-12	1.56753e-13	1.32467e-12	1.51291e-13
		18.99	1.94397e-12	1.56317e-13	1.32305e-12	1.52878e-13
		19.01	1.93732e-12	1.55427e-13	1.32546e-12	1.53634e-13
		19.03	1.93755e-12	1.54904e-13	1.32175e-12	1.51835e-13
		19.05	1.93194e-12	1.54881e-13	1.32526e-12	1.51563e-13
		19.07	1.92277e-12	1.52317e-13	1.31884e-12	1.50977e-13
		19.09	1.91845e-12	1.53932e-13	1.32215e-12	1.50399e-13
		19.11	1.91142e-12	1.52827e-13	1.31357e-12	1.51443e-13
		19.13	1.91368e-12	1.54052e-13	1.31559e-12	1.50995e-13
		19.15	1.91029e-12	1.52191e-13	1.31426e-12	1.52159e-13
		19.17	1.90755e-12	1.51892e-13	1.31092e-12	1.50467e-13
		19.19	1.89577e-12	1.51517e-13	1.31304e-12	1.50423e-13
		19.21	1.89022e-12	1.50733e-13	1.3067e-12	1.47755e-13
		19.23
		19.25
		19.27
		19.29	2.17769e-12	1.67565e-13	1.49454e-12	1.5914e-13
		19.31	2.15595e-12	1.64956e-13	1.48518e-12	1.60725e-13
		19.33	2.16113e-12	1.67556e-13	1.48128e-12	1.58788e-13
		19.35	2.16384e-12	1.66984e-13	1.47564e-12	1.65443e-13
		19.37	2.15507e-12	1.67439e-13	1.47454e-12	1.63338e-13
		19.39	2.15347e-12	1.64593e-13	1.47215e-12	1.62062e-13
		19.41	2.15338e-12	1.6588e-13	1.46757e-12	1.67171e-13
		19.43	2.1547e-12	1.67104e-13	1.46711e-12	1.63254e-13
		19.45	2.1461e-12	1.65575e-13	1.46092e-12	1.64665e-13
		19.47	2.13887e-12	1.64216e-13	1.46038e-12	1.62441e-13
		19.49	2.12963e-12	1.64007e-13	1.45551e-12	1.65316e-13
		19.51	2.12692e-12	1.61934e-13	1.45574e-12	1.6364e-13
		19.53	2.1243e-12	1.6093e-13	1.45203e-12	1.62202e-13
		19.55	2.11583e-12	1.60589e-13	1.4459e-12	1.61211e-13
		19.57	2.11154e-12	1.61622e-13	1.44792e-12	1.61166e-13
		19.59	2.11237e-12	1.63449e-13	1.45054e-12	1.61234e-13
		19.61	2.10331e-12	1.59243e-13	1.43849e-12	1.6376e-13
		19.63	2.10009e-12	1.6055e-13	1.44023e-12	1.61524e-13
		19.65	2.09328e-12	1.61064e-13	1.4378e-12	1.59855e-13
		19.67	2.09039e-12	1.59422e-13	1.43698e-12	1.60257e-13
		19.69	2.08782e-12	1.58903e-13	1.4326e-12	1.60986e-13
		19.71	2.08071e-12	1.6002e-13	1.42998e-12	1.59736e-13
		19.73	2.07312e-12	1.5856e-13	1.42548e-12	1.60408e-13
		19.75	2.07833e-12	1.59916e-13	1.42031e-12	1.58908e-13
		19.77	2.0699e-12	1.5919e-13	1.42228e-12	1.61131e-13
		19.79	2.06228e-12	1.58414e-13	1.41834e-12	1.60932e-13
		19.81	2.05408e-12	1.56895e-13	1.41969e-12	1.59705e-13
		19.83	2.05115e-12	1.58804e-13	1.41886e-12	1.60449e-13
		19.85	2.04798e-12	1.57242e-13	1.41591e-12	1.6136e-13
		19.87	2.04629e-12	1.58181e-13	1.41291e-12	1.60087e-13
		19.89	2.04114e-12	1.5696e-13	1.40954e-12	1.61582e-13
		19.91	2.04021e-12	1.57825e-13	1.40729e-12	1.59251e-13
		19.93	2.03422e-12	1.57401e-13	1.4015e-12	1.61046e-13
		19.95	2.02163e-12	1.54553e-13	1.39851e-12	1.56828e-13
		19.97	2.02336e-12	1.55835e-13	1.39135e-12	1.60152e-13
		19.99	2.01678e-12	1.54794e-13	1.38453e-12	1.56275e-13
		20.01	2.01343e-12	1.53772e-13	1.39337e-12	1.59849e-13
		20.03	2.00801e-12	1.52361e-13	1.38973e-12	1.59868e-13
		20.05	2.00574e-12	1.52915e-13	1.39028e-12	1.59799e-13
		20.07	2.00101e-12	1.54595e-13	1.38552e-12	1.59561e-13
		20.09	1.992e-12	1.52324e-13	1.37939e-12	1.58569e-13
		20.11	1.97797e-12	1.51692e-13	1.38055e-12	1.60936e-13
		20.13	1.97392e-12	1.51364e-13	1.37419e-12	1.58374e-13
		20.15	1.97275e-12	1.51108e-13	1.37638e-12	1.5875e-13
		20.17	1.96978e-12	1.50531e-13	1.3775e-12	1.59727e-13
		20.19	1.96482e-12	1.509e-13	1.36316e-12	1.60532e-13
		20.21	1.96406e-12	1.51145e-13	1.36617e-12	1.5927e-13
		20.23
		20.25
		20.27
		20.29	2.24762e-12	1.68405e-13	1.55115e-12	1.66664e-13
		20.31	2.23507e-12	1.66636e-13	1.5412e-12	1.68184e-13
		20.33	2.2319e-12	1.66607e-13	1.53087e-12	1.6931e-13
		20.35	2.23389e-12	1.68207e-13	1.53282e-12	1.72047e-13
		20.37	2.23342e-12	1.67261e-13	1.53095e-12	1.73967e-13
		20.39	2.2252e-12	1.63731e-13	1.52708e-12	1.72516e-13
		20.41	2.22695e-12	1.66082e-13	1.52408e-12	1.71006e-13
		20.43	2.21886e-12	1.66573e-13	1.52662e-12	1.7125e-13
		20.45	2.2143e-12	1.63087e-13	1.51775e-12	1.73667e-13
		20.47	2.2068e-12	1.64734e-13	1.51227e-12	1.7213e-13
		20.49	2.21382e-12	1.66283e-13	1.51219e-12	1.73319e-13
		20.51	2.20548e-12	1.66623e-13	1.51e-12	1.73237e-13
		20.53	2.20415e-12	1.64951e-13	1.50338e-12	1.70838e-13
		20.55	2.20502e-12	1.64647e-13	1.50607e-12	1.73175e-13
		20.57	2.19317e-12	1.64834e-13	1.50051e-12	1.71864e-13
		20.59	2.18735e-12	1.64071e-13	1.49877e-12	1.70391e-13
		20.61	2.17135e-12	1.61281e-13	1.49762e-12	1.71632e-13
		20.63	2.18089e-12	1.63048e-13	1.49182e-12	1.69175e-13
		20.65	2.16741e-12	1.60812e-13	1.49263e-12	1.69626e-13
		20.67	2.1665e-12	1.61944e-13	1.48544e-12	1.69927e-13
		20.69	2.15005e-12	1.6166e-13	1.48509e-12	1.73816e-13
		20.71	2.15428e-12	1.61576e-13	1.48087e-12	1.70833e-13
		20.73	2.14406e-12	1.6105e-13	1.48335e-12	1.71894e-13
		20.75	2.14574e-12	1.59953e-13	1.47569e-12	1.70417e-13
		20.77	2.14212e-12	1.61442e-13	1.4767e-12	1.68034e-13
		20.79	2.1377e-12	1.59093e-13	1.47497e-12	1.69744e-13
		20.81	2.13702e-12	1.62959e-13	1.47017e-12	1.69128e-13
		20.83	2.13881e-12	1.61679e-13	1.46644e-12	1.69309e-13
		20.85	2.12771e-12	1.60894e-13	1.46579e-12	1.69681e-13
		20.87	2.11867e-12	1.58428e-13	1.46591e-12	1.70553e-13
		20.89	2.1173e-12	1.58971e-13	1.45965e-12	1.68694e-13
		20.91	2.1131e-12	1.58304e-13	1.46565e-12	1.68377e-13
		20.93	2.10506e-12	1.57177e-13	1.45983e-12	1.71758e-13
		20.95	2.09366e-12	1.55518e-13	1.45286e-12	1.68624e-13
		20.97	2.09206e-12	1.55066e-13	1.45407e-12	1.67125e-13
		20.99	2.08954e-12	1.54974e-13	1.45097e-12	1.70509e-13
		21.01	2.0852e-12	1.53701e-13	1.45143e-12	1.71719e-13
		21.03	2.08176e-12	1.54047e-13	1.44785e-12	1.69804e-13
		21.05	2.07325e-12	1.54211e-13	1.43699e-12	1.72563e-13
		21.07	2.07121e-12	1.53201e-13	1.44434e-12	1.68056e-13
		21.09	2.07442e-12	1.532e-13	1.43804e-12	1.69767e-13
		21.11	2.06149e-12	1.52421e-13	1.4348e-12	1.69748e-13
		21.13	2.05369e-12	1.52517e-13	1.43712e-12	1.67022e-13
		21.15	2.05344e-12	1.54132e-13	1.43676e-12	1.67421e-13
		21.17	2.05044e-12	1.51804e-13	1.4283e-12	1.7225e-13
		21.19	2.04842e-12	1.52795e-13	1.43009e-12	1.66448e-13
		21.21	2.048e-12	1.51072e-13	1.43053e-12	1.6709e-13
		21.23
		21.25
		21.27
		21.29	2.32155e-12	1.68197e-13	1.61436e-12	1.79681e-13
		21.31	2.31259e-12	1.68301e-13	1.6037e-12	1.81615e-13
		21.33	2.31288e-12	1.68022e-13	1.59464e-12	1.81427e-13
		21.35	2.30359e-12	1.64872e-13	1.59791e-12	1.82795e-13
		21.37	2.30059e-12	1.65701e-13	1.59574e-12	1.84599e-13
		21.39	2.30281e-12	1.65554e-13	1.59057e-12	1.8646e-13
		21.41	2.29544e-12	1.64777e-13	1.5874e-12	1.86925e-13
		21.43	2.29015e-12	1.6542e-13	1.58818e-12	1.85719e-13
		21.45	2.28525e-12	1.62403e-13	1.58412e-12	1.84364e-13
		21.47	2.2757e-12	1.61961e-13	1.57972e-12	1.84994e-13
		21.49	2.26941e-12	1.62663e-13	1.57638e-12	1.81026e-13
		21.51	2.26834e-12	1.64091e-13	1.57431e-12	1.83738e-13
		21.53	2.26271e-12	1.6151e-13	1.56962e-12	1.84601e-13
		21.55	2.25851e-12	1.60515e-13	1.57144e-12	1.86362e-13
		21.57	2.25197e-12	1.60171e-13	1.56561e-12	1.86815e-13
		21.59	2.25063e-12	1.61102e-13	1.56218e-12	1.88462e-13
		21.61	2.24182e-12	1.60402e-13	1.55952e-12	1.86606e-13
		21.63	2.2428e-12	1.61383e-13	1.55903e-12	1.85142e-13
		21.65	2.23821e-12	1.60193e-13	1.55485e-12	1.85173e-13
		21.67	2.22662e-12	1.58452e-13	1.55278e-12	1.85808e-13
		21.69	2.22347e-12	1.59032e-13	1.54985e-12	1.81657e-13
		21.71	2.22075e-12	1.60579e-13	1.54909e-12	1.81807e-13
		21.73	2.2092e-12	1.56924e-13	1.54981e-12	1.8527e-13
		21.75	2.21069e-12	1.55831e-13	1.54426e-12	1.83581e-13
		21.77	2.20202e-12	1.56761e-13	1.54343e-12	1.81618e-13
		21.79	2.19547e-12	1.56157e-13	1.53671e-12	1.84376e-13
		21.81	2.19594e-12	1.55534e-13	1.53481e-12	1.83789e-13
		21.83	2.19105e-12	1.55755e-13	1.52901e-12	1.84836e-13
		21.85	2.18724e-12	1.55561e-13	1.5289e-12	1.84602e-13
		21.87	2.17954e-12	1.56105e-13	1.5325e-12	1.82202e-13
		21.89	2.17716e-12	1.54085e-13	1.51982e-12	1.84735e-13
		21.91	2.1804e-12	1.55808e-13	1.52103e-12	1.8441e-13
		21.93	2.17858e-12	1.5363e-13	1.5142e-12	1.86269e-13
		21.95	2.17101e-12	1.5477e-13	1.5091e-12	1.83329e-13
		21.97	2.1653e-12	1.52184e-13	1.51683e-12	1.83585e-13
		21.99	2.15652e-12	1.52147e-13	1.50684e-12	1.86682e-13
		22.01	2.14999e-12	1.51803e-13	1.51254e-12	1.82137e-13
		22.03	2.14615e-12	1.52436e-13	1.503e-12	1.81248e-13
		22.05	2.15e-12	1.52286e-13	1.50446e-12	1.83571e-13
		22.07	2.13905e-12	1.49984e-13	1.49614e-12	1.83368e-13
		22.09	2.13195e-12	1.49361e-13	1.49788e-12	1.82754e-13
		22.11	2.12641e-12	1.50072e-13	1.49795e-12	1.84201e-13
		22.13	2.12155e-12	1.49761e-13	1.49329e-12	1.7986e-13
		22.15	2.11445e-12	1.4854e-13	1.48668e-12	1.80404e-13
		22.17	2.10763e-12	1.47491e-13	1.48158e-12	1.79636e-13
		22.19	2.10424e-12	1.489e-13	1.48447e-12	1.80699e-13
		22.21	2.10484e-12	1.46917e-13	1.49179e-12	1.85726e-13
		22.23
		22.25
		22.27
		22.29	2.3771e-12	1.65207e-13	1.67368e-12	1.92297e-13
		22.31	2.37291e-12	1.67951e-13	1.66308e-12	1.92952e-13
		22.33	2.36313e-12	1.64376e-13	1.65588e-12	1.95345e-13
		22.35	2.37128e-12	1.66445e-13	1.65164e-12	1.93794e-13
		22.37	2.36669e-12	1.65008e-13	1.65273e-12	1.99452e-13
		22.39	2.36132e-12	1.65593e-13	1.65382e-12	1.97681e-13
		22.41	2.35408e-12	1.64098e-13	1.65006e-12	1.97896e-13
		22.43	2.35583e-12	1.64824e-13	1.64145e-12	1.97414e-13
		22.45	2.35153e-12	1.65237e-13	1.64439e-12	1.9694e-13
		22.47	2.34295e-12	1.62418e-13	1.63777e-12	1.9654e-13
		22.49	2.33628e-12	1.62607e-13	1.64e-12	1.97059e-13
		22.51	2.33033e-12	1.61827e-13	1.63712e-12	1.94939e-13
		22.53	2.31799e-12	1.61301e-13	1.63769e-12	1.96163e-13
		22.55	2.30875e-12	1.61238e-13	1.63825e-12	1.98459e-13
		22.57	2.30076e-12	1.60357e-13	1.6304e-12	1.98375e-13
		22.59	2.29681e-12	1.61037e-13	1.61926e-12	1.97829e-13
		22.61	2.29402e-12	1.58638e-13	1.61956e-12	1.95702e-13
		22.63	2.28839e-12	1.58195e-13	1.61801e-12	1.95778e-13
		22.65	2.29095e-12	1.58509e-13	1.60755e-12	1.96622e-13
		22.67	2.28279e-12	1.58168e-13	1.61085e-12	1.96775e-13
		22.69	2.29167e-12	1.60134e-13	1.60814e-12	1.96448e-13
		22.71	2.2847e-12	1.58993e-13	1.60263e-12	1.94635e-13
		22.73	2.27519e-12	1.59617e-13	1.60202e-12	1.97175e-13
		22.75	2.27154e-12	1.59487e-13	1.59671e-12	1.97374e-13
		22.77	2.26431e-12	1.57288e-13	1.59713e-12	1.97897e-13
		22.79	2.26834e-12	1.58886e-13	1.59408e-12	1.96813e-13
		22.81	2.26552e-12	1.57866e-13	1.59221e-12	1.93134e-13
		22.83	2.25416e-12	1.57554e-13	1.58875e-12	1.92066e-13
		22.85	2.25365e-12	1.57579e-13	1.58948e-12	1.92705e-13
		22.87	2.23182e-12	1.55605e-13	1.57956e-12	1.93382e-13
		22.89	2.22874e-12	1.55064e-13	1.58003e-12	1.90907e-13
		22.91	2.22591e-12	1.53958e-13	1.5742e-12	1.90534e-13
		22.93	2.22549e-12	1.55694e-13	1.57982e-12	1.89651e-13
		22.95	2.2203e-12	1.55075e-13	1.57827e-12	1.93798e-13
		22.97	2.21826e-12	1.55155e-13	1.57389e-12	1.91568e-13
		22.99	2.20268e-12	1.53194e-13	1.56414e-12	1.91718e-13
		23.01	2.20272e-12	1.53053e-13	1.56554e-12	1.89503e-13
		23.03	2.20503e-12	1.53701e-13	1.56577e-12	1.90957e-13
		23.05	2.19359e-12	1.52165e-13	1.56203e-12	1.91336e-13
		23.07	2.19031e-12	1.52402e-13	1.55746e-12	1.92974e-13
		23.09	2.18801e-12	1.52165e-13	1.55649e-12	1.91803e-13
		23.11	2.18495e-12	1.50924e-13	1.55427e-12	1.89806e-13
		23.13	2.18061e-12	1.51013e-13	1.55861e-12	1.91014e-13
		23.15	2.17366e-12	1.49654e-13	1.55238e-12	1.88746e-13
		23.17	2.17321e-12	1.5015e-13	1.54364e-12	1.90796e-13
		23.19	2.15703e-12	1.48168e-13	1.54508e-12	1.91381e-13
		23.21	2.16212e-12	1.4942e-13	1.5345e-12	1.90612e-13
		23.23
		23.25
		23.27
		23.29	2.44162e-12	1.65844e-13	1.72587e-12	1.99015e-13
		23.31	2.42646e-12	1.66443e-13	1.71062e-12	2.01981e-13
		23.33	2.43567e-12	1.67986e-13	1.71049e-12	2.03012e-13
		23.35	2.43091e-12	1.67217e-13	1.70329e-12	2.04362e-13
		23.37	2.42847e-12	1.67452e-13	1.70011e-12	2.04356e-13
		23.39	2.42024e-12	1.63961e-13	1.70049e-12	2.08161e-13
		23.41	2.42262e-12	1.64737e-13	1.6972e-12	2.06224e-13
		23.43	2.41601e-12	1.64521e-13	1.6977e-12	2.05e-13
		23.45	2.41547e-12	1.67113e-13	1.6936e-12	2.07526e-13
		23.47	2.40296e-12	1.64756e-13	1.69258e-12	2.06903e-13
		23.49	2.408e-12	1.6582e-13	1.68538e-12	2.05343e-13
		23.51	2.40439e-12	1.65989e-13	1.6838e-12	2.08876e-13
		23.53	2.38979e-12	1.65624e-13	1.68145e-12	2.06517e-13
		23.55	2.39114e-12	1.63508e-13	1.6762e-12	2.06666e-13
		23.57	2.38977e-12	1.64373e-13	1.67069e-12	2.0521e-13
		23.59	2.38139e-12	1.62182e-13	1.67066e-12	2.04057e-13
		23.61	2.37538e-12	1.61216e-13	1.67592e-12	2.0399e-13
		23.63	2.38908e-12	1.64783e-13	1.66601e-12	2.0351e-13
		23.65	2.36737e-12	1.63325e-13	1.66373e-12	2.05884e-13
		23.67	2.36367e-12	1.61684e-13	1.65806e-12	2.04271e-13
		23.69	2.36072e-12	1.63704e-13	1.6572e-12	2.00546e-13
		23.71	2.36155e-12	1.65003e-13	1.65115e-12	2.04998e-13
		23.73	2.3485e-12	1.60249e-13	1.65614e-12	2.04164e-13
		23.75	2.33785e-12	1.59876e-13	1.64917e-12	2.03629e-13
		23.77	2.3417e-12	1.61251e-13	1.64476e-12	1.99883e-13
		23.79	2.32725e-12	1.59943e-13	1.63835e-12	1.99249e-13
		23.81	2.32731e-12	1.58757e-13	1.63543e-12	1.9812e-13
		23.83	2.31985e-12	1.59684e-13	1.63211e-12	2.02575e-13
		23.85	2.30985e-12	1.5801e-13	1.63518e-12	1.97972e-13
		23.87	2.30002e-12	1.54805e-13	1.6317e-12	1.99568e-13
		23.89	2.30373e-12	1.56438e-13	1.62951e-12	2.01872e-13
		23.91	2.29517e-12	1.53442e-13	1.62228e-12	1.99781e-13
		23.93	2.2907e-12	1.54367e-13	1.62235e-12	2.00037e-13
		23.95	2.28614e-12	1.55345e-13	1.62274e-12	1.99427e-13
		23.97	2.27716e-12	1.53694e-13	1.61792e-12	2.00515e-13
		23.99	2.26814e-12	1.53834e-13	1.61719e-12	1.98845e-13
		24.01	2.26741e-12	1.52409e-13	1.61731e-12	2.03932e-13
		24.03	2.26597e-12	1.52162e-13	1.60506e-12	2.01263e-13
		24.05	2.25582e-12	1.51572e-13	1.60263e-12	2.03141e-13
		24.07	2.25331e-12	1.51738e-13	1.60674e-12	2.02426e-13
		24.09	2.2499e-12	1.5236e-13	1.60647e-12	1.99916e-13
		24.11	2.24264e-12	1.5135e-13	1.60299e-12	1.98844e-13
		24.13	2.24277e-12	1.50505e-13	1.60022e-12	1.98247e-13
		24.15	2.23388e-12	1.5024e-13	1.59634e-12	1.98117e-13
		24.17	2.2291e-12	1.51605e-13	1.59764e-12	1.9863e-13
		24.19	2.22848e-12	1.50664e-13	1.59083e-12	1.99372e-13
		24.21	2.22262e-12	1.4968e-13	1.58801e-12	2.00469e-13
		24.23
		24.25
		24.27
		24.29	2.49822e-12	1.64981e-13	1.7727e-12	2.09592e-13
		24.31	2.49113e-12	1.64682e-13	1.76592e-12	2.09799e-13
		24.33	2.48308e-12	1.64116e-13	1.76627e-12	2.11034e-13
		24.35	2.47937e-12	1.62639e-13	1.75326e-12	2.11446e-13
		24.37	2.4817e-12	1.62775e-13	1.75538e-12	2.14721e-13
		24.39	2.47974e-12	1.62747e-13	1.75138e-12	2.10976e-13
		24.41	2.47463e-12	1.60927e-13	1.74874e-12	2.151e-13
		24.43	2.46852e-12	1.63861e-13	1.74697e-12	2.16736e-13
		24.45	2.46863e-12	1.62352e-13	1.74501e-12	2.13195e-13
		24.47	2.46457e-12	1.61983e-13	1.74291e-12	2.13169e-13
		24.49	2.45642e-12	1.62771e-13	1.73792e-12	2.13253e-13
		24.51	2.45987e-12	1.64067e-13	1.74316e-12	2.14229e-13
		24.53	2.44883e-12	1.61973e-13	1.73467e-12	2.14089e-13
		24.55	2.44772e-12	1.62539e-13	1.72877e-12	2.14401e-13
		24.57	2.44296e-12	1.62147e-13	1.72193e-12	2.11978e-13
		24.59	2.43247e-12	1.6219e-13	1.73124e-12	2.13495e-13
		24.61	2.43007e-12	1.61213e-13	1.72785e-12	2.11302e-13
		24.63	2.43003e-12	1.6044e-13	1.72098e-12	2.12196e-13
		24.65	2.42743e-12	1.62357e-13	1.71875e-12	2.10787e-13
		24.67	2.4189e-12	1.61464e-13	1.71881e-12	2.10107e-13
		24.69	2.41015e-12	1.61001e-13	1.71502e-12	2.10302e-13
		24.71	2.41266e-12	1.6068e-13	1.71325e-12	2.13193e-13
		24.73	2.40133e-12	1.5899e-13	1.7107e-12	2.09459e-13
		24.75	2.4039e-12	1.59689e-13	1.70216e-12	2.10456e-13
		24.77	2.39417e-12	1.58573e-13	1.7025e-12	2.11082e-13
		24.79	2.38191e-12	1.58887e-13	1.70079e-12	2.07326e-13
		24.81	2.38079e-12	1.60355e-13	1.69739e-12	2.11449e-13
		24.83	2.37566e-12	1.58387e-13	1.69479e-12	2.09069e-13
		24.85	2.37194e-12	1.56757e-13	1.68902e-12	2.09525e-13
		24.87	2.36774e-12	1.57205e-13	1.68832e-12	2.10585e-13
		24.89	2.36269e-12	1.57612e-13	1.67586e-12	2.10499e-13
		24.91	2.35565e-12	1.58639e-13	1.68076e-12	2.07498e-13
		24.93	2.34804e-12	1.5717e-13	1.6768e-12	2.10134e-13
		24.95	2.34567e-12	1.56977e-13	1.6709e-12	2.09541e-13
		24.97	2.33869e-12	1.54927e-13	1.67569e-12	2.09556e-13
		24.99	2.33937e-12	1.556e-13	1.66942e-12	2.10994e-13
		25.01	2.32895e-12	1.54e-13	1.66328e-12	2.09545e-13
		25.03	2.31573e-12	1.54279e-13	1.66545e-12	2.08097e-13
		25.05	2.31933e-12	1.53844e-13	1.66361e-12	2.06744e-13
		25.07	2.31272e-12	1.53571e-13	1.65839e-12	2.08056e-13
		25.09	2.31052e-12	1.52796e-13	1.65768e-12	2.07483e-13
		25.11	2.29996e-12	1.53449e-13	1.65175e-12	2.09979e-13
		25.13	2.29777e-12	1.52055e-13	1.64965e-12	2.07665e-13
		25.15	2.28797e-12	1.51794e-13	1.64459e-12	2.09304e-13
		25.17	2.29045e-12	1.50608e-13	1.64842e-12	2.10756e-13
		25.19	2.2845e-12	1.51407e-13	1.64493e-12	2.12459e-13
		25.21	2.2757e-12	1.50876e-13	1.6464e-12	2.11202e-13
		25.23	2.27387e-12	1.51281e-13	1.6384e-12	2.10935e-13
		25.25	2.26742e-12	1.51037e-13	1.63585e-12	2.11126e-13
		25.27	2.26098e-12	1.50466e-13	1.63697e-12	2.10657e-13
		25.29	2.25805e-12	1.51434e-13	1.63097e-12	2.09383e-13
		25.31	2.25952e-12	1.49463e-13	1.63052e-12	2.09708e-13
		25.33	2.25624e-12	1.49072e-13	1.6257e-12	2.11011e-13
		25.35	2.25713e-12	1.48894e-13	1.62063e-12	2.10607e-13
		25.37	2.25091e-12	1.48127e-13	1.62344e-12	2.09282e-13
		25.39	2.24749e-12	1.47832e-13	1.62031e-12	2.07702e-13
		25.41	2.23923e-12	1.47705e-13	1.61733e-12	2.10648e-13
		25.43	2.23007e-12	1.47335e-13	1.61791e-12	2.06481e-13
		25.45	2.22934e-12	1.47294e-13	1.61557e-12	2.08259e-13
		25.47	2.22679e-12	1.48219e-13	1.61525e-12	2.06628e-13
		25.49	2.22026e-12	1.47161e-13	1.61926e-12	2.07369e-13
		25.51	2.21945e-12	1.45678e-13	1.61523e-12	2.06409e-13
		25.53	2.21843e-12	1.45854e-13	1.60494e-12	2.09173e-13
		25.55	2.21722e-12	1.45395e-13	1.60282e-12	2.05787e-13
		25.57	2.20491e-12	1.44604e-13	1.60519e-12	2.06496e-13
		25.59	2.21075e-12	1.43916e-13	1.60259e-12	2.08142e-13
		25.61	2.20567e-12	1.45637e-13	1.59731e-12	2.07637e-13
		25.63	2.19947e-12	1.45308e-13	1.59869e-12	2.04608e-13
		25.65	2.19736e-12	1.44216e-13	1.59775e-12	2.05521e-13
		25.67	2.1921e-12	1.46241e-13	1.59624e-12	2.035e-13
		25.69	2.18945e-12	1.43715e-13	1.59064e-12	2.09937e-13
		25.71	2.18977e-12	1.45538e-13	1.59248e-12	2.07004e-13
		25.73	2.18004e-12	1.45183e-13	1.58423e-12	2.0577e-13
		25.75	2.17643e-12	1.44759e-13	1.59276e-12	2.07075e-13
		25.77	2.17774e-12	1.44508e-13	1.5819e-12	2.08427e-13
		25.79	2.17698e-12	1.44043e-13	1.58374e-12	2.07294e-13
		25.81	2.17241e-12	1.42592e-13	1.58397e-12	2.10143e-13
		25.83	2.17159e-12	1.43571e-13	1.58537e-12	2.07031e-13
		25.85	2.1655e-12	1.43118e-13	1.5775e-12	2.07025e-13
		25.87	2.16192e-12	1.43096e-13	1.57987e-12	2.03466e-13
		25.89	2.16472e-12	1.44362e-13	1.57284e-12	2.05541e-13
		25.91	2.15857e-12	1.44384e-13	1.67962e-12	2.06897e-13
		25.93	2.15158e-12	1.42668e-13	1.67288e-12	2.09105e-13
		25.95	2.14824e-12	1.43464e-13	1.67718e-12	2.07337e-13
		25.97	2.14641e-12	1.4317e-13	1.67269e-12	2.09841e-13
		25.99	2.14681e-12	1.42794e-13	1.67086e-12	2.08649e-13
		26.01	2.14359e-12	1.4146e-13	1.66941e-12	2.10216e-13
		26.03	2.14158e-12	1.41738e-13	1.67065e-12	2.09612e-13
		26.05	2.13726e-12	1.4125e-13	1.65918e-12	2.08546e-13
		26.07	2.13557e-12	1.40698e-13	1.66321e-12	2.11941e-13
		26.09	2.12956e-12	1.39685e-13	1.65829e-12	2.05705e-13
		26.11	2.12907e-12	1.40708e-13	1.66227e-12	2.07172e-13
		26.13	2.1294e-12	1.40339e-13	1.6536e-12	2.05215e-13
		26.15	2.12141e-12	1.40249e-13	1.65848e-12	2.06593e-13
		26.17	2.12086e-12	1.40326e-13	1.65327e-12	2.09918e-13
		26.19	2.11764e-12	1.39681e-13	1.65339e-12	2.08252e-13
		26.21	2.11472e-12	1.40442e-13	1.65515e-12	2.11047e-13
		26.23	2.10905e-12	1.40051e-13	1.64986e-12	2.09349e-13
		26.25	2.10146e-12	1.39514e-13	1.65115e-12	2.09416e-13
		26.27	2.10555e-12	1.38441e-13	1.6458e-12	2.10346e-13
		26.29	2.1057e-12	1.38999e-13	1.64929e-12	2.09577e-13
		26.31	2.09694e-12	1.39446e-13	1.65012e-12	2.09426e-13
		26.33	2.09331e-12	1.38134e-13	1.63922e-12	2.08572e-13
		26.35	2.08941e-12	1.38425e-13	1.64095e-12	2.08828e-13
		26.37	2.08731e-12	1.37547e-13	1.64327e-12	2.09152e-13
		26.39	2.08239e-12	1.38681e-13	1.64457e-12	2.10907e-13
		26.41	2.08506e-12	1.37617e-13	1.64186e-12	2.12021e-13
		26.43	2.08091e-12	1.37467e-13	1.63448e-12	2.09792e-13
		26.45	2.07947e-12	1.38558e-13	1.63379e-12	2.11534e-13
		26.47	2.08043e-12	1.37317e-13	1.63912e-12	2.11321e-13
		26.49	2.07955e-12	1.38495e-13	1.63228e-12	2.1068e-13
		26.51	2.06806e-12	1.36796e-13	1.63417e-12	2.14089e-13
		26.53	2.07115e-12	1.36465e-13	1.63382e-12	2.13264e-13
		26.55	2.06705e-12	1.36823e-13	1.63535e-12	2.12025e-13
		26.57	2.05628e-12	1.36426e-13	1.63113e-12	2.11916e-13
		26.59	2.05811e-12	1.37269e-13	1.63085e-12	2.13932e-13
		26.61	2.05192e-12	1.34713e-13	1.62434e-12	2.13884e-13
		26.63	2.0521e-12	1.35624e-13	1.62659e-12	2.09184e-13
		26.65	2.04914e-12	1.35376e-13	1.62459e-12	2.11352e-13
		26.67	2.04767e-12	1.34899e-13	1.6271e-12	2.12965e-13
		26.69	2.04727e-12	1.34668e-13	1.61886e-12	2.12636e-13
		26.71	2.04179e-12	1.34548e-13	1.62074e-12	2.11137e-13
		26.73	2.03873e-12	1.33589e-13	1.61512e-12	2.14465e-13
		26.75	2.03638e-12	1.33584e-13	1.613e-12	2.12292e-13
		26.77	2.03744e-12	1.33851e-13	1.61145e-12	2.0893e-13
		26.79	2.03332e-12	1.33954e-13	1.61445e-12	2.12132e-13
		26.81	2.03445e-12	1.31856e-13	1.61244e-12	2.12273e-13
		26.83	2.02856e-12	1.3301e-13	1.61079e-12	2.10413e-13
		26.85	2.02311e-12	1.33174e-13	1.60984e-12	2.1337e-13
		26.87	2.01718e-12	1.33239e-13	1.61583e-12	2.12111e-13
		26.89	2.01354e-12	1.31292e-13	1.60851e-12	2.10836e-13
		26.91	2.01417e-12	1.33289e-13	1.60702e-12	2.10728e-13
		26.93	2.01505e-12	1.31132e-13	1.603e-12	2.09376e-13
		26.95	2.0123e-12	1.32103e-13	1.60195e-12	2.11036e-13
		26.97	2.00457e-12	1.2991e-13	1.59722e-12	2.10001e-13
		26.99	2.00822e-12	1.31801e-13	1.59806e-12	2.11833e-13
		27.01	2.00601e-12	1.30526e-13	1.59646e-12	2.09549e-13
		27.03	2.00146e-12	1.30652e-13	1.59281e-12	2.0947e-13
		27.05	1.99799e-12	1.29962e-13	1.59472e-12	2.10855e-13
		27.07	1.99998e-12	1.30741e-13	1.59277e-12	2.11829e-13
		27.09	1.99085e-12	1.30364e-13	1.59109e-12	2.13597e-13
		27.11	1.99199e-12	1.30236e-13	1.58625e-12	2.13528e-13
		27.13	1.99078e-12	1.303e-13	1.58891e-12	2.11606e-13
		27.15	1.98842e-12	1.30074e-13	1.58799e-12	2.14479e-13
		27.17	1.98741e-12	1.29965e-13	1.58462e-12	2.12937e-13
		27.19	1.98408e-12	1.31399e-13	1.59084e-12	2.12668e-13
		27.21	1.98543e-12	1.28769e-13	1.58476e-12	2.14806e-13
		27.23	1.98572e-12	1.29601e-13	1.58483e-12	2.15075e-13
		27.25	1.98049e-12	1.30803e-13	1.57558e-12	2.13279e-13
		27.27	1.97428e-12	1.29763e-13	1.57792e-12	2.10666e-13
		27.29	1.97202e-12	1.28825e-13	1.58115e-12	2.12702e-13
		27.31	1.96882e-12	1.29001e-13	1.58136e-12	2.11835e-13
		27.33	1.96878e-12	1.26658e-13	1.57211e-12	2.15748e-13
		27.35	1.96435e-12	1.28719e-13	1.57705e-12	2.14695e-13
		27.37	1.96668e-12	1.28703e-13	1.57581e-12	2.119e-13
		27.39	1.96325e-12	1.30039e-13	1.57378e-12	2.11581e-13
		27.41	1.96912e-12	1.28088e-13	1.57565e-12	2.1373e-13
		27.43	1.95869e-12	1.28555e-13	1.56957e-12	2.11834e-13
		27.45	1.95611e-12	1.266e-13	1.57441e-12	2.1428e-13
		27.47	1.95099e-12	1.28364e-13	1.57581e-12	2.1288e-13
		27.49	1.95142e-12	1.28374e-13	1.56769e-12	2.151e-13
		27.51	1.94531e-12	1.27032e-13	1.56314e-12	2.12039e-13
		27.53	1.94656e-12	1.27019e-13	1.5667e-12	2.12283e-13
		27.55	1.94088e-12	1.2694e-13	1.56297e-12	2.10965e-13
		27.57	1.9424e-12	1.26768e-13	1.56272e-12	2.1133e-13
		27.59	1.93921e-12	1.27728e-13	1.56731e-12	2.13942e-13
		27.61	1.93804e-12	1.26113e-13	1.56471e-12	2.1043e-13
		27.63	1.93314e-12	1.264e-13	1.55901e-12	2.13081e-13
		27.65	1.92442e-12	1.26974e-13	1.55874e-12	2.11804e-13
		27.67	1.92695e-12	1.26839e-13	1.55646e-12	2.14967e-13
		27.69	1.92073e-12	1.28975e-13	1.55733e-12	2.15458e-13
		27.71	1.92846e-12	1.28689e-13	1.55743e-12	2.1605e-13
		27.73	1.9234e-12	1.26425e-13	1.55816e-12	2.13599e-13
		27.75	1.9169e-12	1.26894e-13	1.55374e-12	2.13572e-13
		27.77	1.92001e-12	1.26929e-13	1.55463e-12	2.10875e-13
		27.79	1.92088e-12	1.26361e-13	1.55358e-12	2.1142e-13
		27.81	1.91689e-12	1.25897e-13	1.55265e-12	2.13504e-13
		27.83	1.90968e-12	1.27702e-13	1.54977e-12	2.10821e-13
		27.85	1.9109e-12	1.2676e-13	1.55284e-12	2.12485e-13
		27.87	1.90905e-12	1.27586e-13	1.54677e-12	2.14672e-13
		27.89	1.90616e-12	1.2484e-13	1.54829e-12	2.15276e-13
		27.91	1.90109e-12	1.25172e-13	1.54465e-12	2.13819e-13
		27.93	1.89983e-12	1.26366e-13	1.53906e-12	2.14383e-13
		27.95	1.89908e-12	1.26261e-13	1.53947e-12	2.15084e-13
		27.97	1.90058e-12	1.25669e-13	1.53639e-12	2.1441e-13
		27.99	1.89439e-12	1.25849e-13	1.53558e-12	2.16887e-13
		28.01	1.89771e-12	1.27756e-13	1.53767e-12	2.14272e-13
		28.03	1.88896e-12	1.25885e-13	1.5412e-12	2.13173e-13
		28.05	1.88736e-12	1.27104e-13	1.53297e-12	2.10252e-13
		28.07	1.89159e-12	1.27093e-13	1.52887e-12	2.15426e-13
		28.09	1.8844e-12	1.26116e-13	1.53145e-12	2.08897e-13
		28.11	1.88499e-12	1.25685e-13	1.52068e-12	2.11018e-13
		28.13	1.87939e-12	1.25202e-13	1.52743e-12	2.09649e-13
		28.15	1.87835e-12	1.25052e-13	1.52564e-12	2.1084e-13
		28.17	1.88091e-12	1.26252e-13	1.52755e-12	2.10543e-13
		28.19	1.87321e-12	1.25487e-13	1.51655e-12	2.09039e-13
		28.21	1.87241e-12	1.25646e-13	1.52269e-12	2.10485e-13
		28.23	1.87411e-12	1.24729e-13	1.52052e-12	2.09204e-13
		28.25	1.87251e-12	1.22526e-13	1.5187e-12	2.10405e-13
		28.27	1.86842e-12	1.23544e-13	1.51599e-12	2.09125e-13
		28.29	1.86787e-12	1.23217e-13	1.51536e-12	2.09839e-13
		28.31	1.8646e-12	1.21896e-13	1.51448e-12	2.08886e-13
		28.33	1.86283e-12	1.24364e-13	1.5099e-12	2.08506e-13
		28.35	1.86419e-12	1.2361e-13	1.51053e-12	2.09394e-13
		28.37	1.86712e-12	1.23322e-13	1.51096e-12	2.09859e-13
		28.39	1.86229e-12	1.23814e-13	1.50906e-12	2.06771e-13
		28.41	1.863e-12	1.2306e-13	1.50583e-12	2.10709e-13
		28.43	1.86131e-12	1.21757e-13	1.50823e-12	2.08989e-13
		28.45	1.85269e-12	1.23956e-13	1.50231e-12	2.0782e-13
		28.47	1.85779e-12	1.22452e-13	1.50067e-12	2.11454e-13
		28.49	1.85242e-12	1.21387e-13	1.50049e-12	2.10158e-13
		28.51	1.85311e-12	1.21968e-13	1.49912e-12	2.09373e-13
		28.53	1.85981e-12	1.20422e-13	1.49583e-12	2.07499e-13
		28.55	1.84779e-12	1.19937e-13	1.49157e-12	2.06638e-13
		28.57	1.84537e-12	1.19269e-13	1.50044e-12	2.09305e-13
		28.59	1.84154e-12	1.20797e-13	1.50022e-12	2.09332e-13
		28.61	1.8405e-12	1.20009e-13	1.49496e-12	2.09118e-13
		28.63	1.84122e-12	1.20266e-13	1.49137e-12	2.08602e-13
		28.65	1.83898e-12	1.22146e-13	1.48903e-12	2.08862e-13
		28.67	1.83977e-12	1.19531e-13	1.49272e-12	2.0832e-13
		28.69	1.8403e-12	1.21037e-13	1.49006e-12	2.09214e-13
		28.71	1.83613e-12	1.21597e-13	1.48597e-12	2.09318e-13
		28.73	1.83444e-12	1.19615e-13	1.48133e-12	2.09714e-13
		28.75	1.83128e-12	1.19914e-13	1.4909e-12	2.10608e-13
		28.77	1.83443e-12	1.19521e-13	1.4831e-12	2.07055e-13
		28.79	1.82637e-12	1.20308e-13	1.48388e-12	2.08062e-13
		28.81	1.82924e-12	1.18903e-13	1.48498e-12	2.08964e-13
		28.83	1.82622e-12	1.21023e-13	1.48194e-12	2.07331e-13
		28.85	1.82502e-12	1.2026e-13	1.48342e-12	2.07088e-13
		28.87	1.82224e-12	1.19336e-13	1.48213e-12	2.10848e-13
		28.89	1.82038e-12	1.19088e-13	1.48333e-12	2.09131e-13
		28.91	1.8126e-12	1.19971e-13	1.47653e-12	2.06006e-13
		28.93	1.81025e-12	1.19483e-13	1.48127e-12	2.07048e-13
		28.95	1.81109e-12	1.16756e-13	1.48529e-12	2.0841e-13
		28.97	1.8076e-12	1.20058e-13	1.47807e-12	2.07858e-13
		28.99	1.80732e-12	1.19864e-13	1.47732e-12	2.07315e-13
		29.01	1.80593e-12	1.18394e-13	1.47546e-12	2.07935e-13
		29.03	1.80563e-12	1.19177e-13	1.47363e-12	2.08608e-13
		29.05	1.80456e-12	1.19898e-13	1.47425e-12	2.07903e-13
		29.07	1.80055e-12	1.18853e-13	1.47012e-12	2.07156e-13
		29.09	1.80373e-12	1.18106e-13	1.47012e-12	2.06103e-13
		29.11	1.7907e-12	1.17895e-13	1.46597e-12	2.06146e-13
		29.13	1.7936e-12	1.18753e-13	1.46691e-12	2.0876e-13
		29.15	1.79209e-12	1.17443e-13	1.46738e-12	2.07606e-13
		29.17	1.79394e-12	1.18144e-13	1.46595e-12	2.06638e-13
		29.19	1.79388e-12	1.20407e-13	1.46859e-12	2.08237e-13
		29.21	1.79237e-12	1.18565e-13	1.46863e-12	2.06966e-13
		29.23	1.79553e-12	1.17029e-13	1.46724e-12	2.08251e-13
		29.25	1.79201e-12	1.18829e-13	1.46657e-12	2.06327e-13
		29.27	1.79058e-12	1.1965e-13	1.46536e-12	2.08013e-13
		29.29	1.79031e-12	1.18941e-13	1.45967e-12	2.05537e-13
		29.31	1.78415e-12	1.20082e-13	1.46469e-12	2.09452e-13
		29.33	1.78472e-12	1.19272e-13	1.46682e-12	2.09013e-13
		29.35	1.78341e-12	1.1764e-13	1.46213e-12	2.07615e-13
		29.37	1.78555e-12	1.17467e-13	1.45856e-12	2.05404e-13
		29.39	1.78006e-12	1.15249e-13	1.46232e-12	2.08774e-13
		29.41	1.78208e-12	1.16834e-13	1.46175e-12	2.09894e-13
		29.43	1.78082e-12	1.16523e-13	1.45745e-12	2.09321e-13
		29.45	1.77545e-12	1.15634e-13	1.46023e-12	2.08005e-13
		29.47	1.77299e-12	1.1687e-13	1.45849e-12	2.06583e-13
		29.49	1.78172e-12	1.16763e-13	1.46433e-12	2.0853e-13
		29.51	1.76605e-12	1.16162e-13	1.4576e-12	2.08322e-13
		29.53	1.77162e-12	1.18083e-13	1.45542e-12	2.05734e-13
		29.55	1.77113e-12	1.16909e-13	1.45208e-12	2.07452e-13
		29.57	1.76793e-12	1.15401e-13	1.4608e-12	2.07583e-13
		29.59	1.76692e-12	1.15907e-13	1.45616e-12	2.07327e-13
		29.61	1.75517e-12	1.16856e-13	1.45189e-12	2.08265e-13
		29.63	1.7636e-12	1.16448e-13	1.44813e-12	2.08124e-13
		29.65	1.75458e-12	1.16555e-13	1.45244e-12	2.06424e-13
		29.67	1.75564e-12	1.17689e-13	1.45294e-12	2.06534e-13
		29.69	1.75771e-12	1.16299e-13	1.45338e-12	2.07406e-13
		29.71	1.75498e-12	1.17094e-13	1.44991e-12	2.07267e-13
		29.73	1.74337e-12	1.16196e-13	1.44994e-12	2.0913e-13
		29.75	1.74311e-12	1.1735e-13	1.44855e-12	2.06643e-13
		29.77	1.74326e-12	1.16241e-13	1.45028e-12	2.08946e-13
		29.79	1.74864e-12	1.14947e-13	1.44193e-12	2.09545e-13
		29.81	1.7444e-12	1.14622e-13	1.44475e-12	2.06627e-13
		29.83	1.7386e-12	1.15321e-13	1.44598e-12	2.06937e-13
		29.85	1.74444e-12	1.14735e-13	1.44394e-12	2.08498e-13
		29.87	1.7396e-12	1.15864e-13	1.43717e-12	2.07522e-13
		29.89	1.73891e-12	1.14161e-13	1.44168e-12	2.07721e-13
		29.91	1.73922e-12	1.1481e-13	1.43854e-12	2.09912e-13
		29.93	1.73347e-12	1.17074e-13	1.4338e-12	2.06998e-13
		29.95	1.73208e-12	1.16545e-13	1.4337e-12	2.10499e-13
		29.97	1.73067e-12	1.16089e-13	1.43752e-12	2.09164e-13
		29.99	1.7293e-12	1.14441e-13	1.43334e-12	2.10537e-13
		30.01	1.72917e-12	1.15823e-13	1.43305e-12	2.09065e-13
		30.03	1.72934e-12	1.15726e-13	1.43122e-12	2.06406e-13
		30.05	1.72449e-12	1.1494e-13	1.42803e-12	2.05097e-13
		30.07	1.72567e-12	1.15024e-13	1.43164e-12	2.06971e-13
		30.09	1.73147e-12	1.17436e-13	1.42799e-12	2.07436e-13
		30.11	1.73216e-12	1.14247e-13	1.42823e-12	2.06585e-13
		30.13	1.72672e-12	1.13992e-13	1.42859e-12	2.05694e-13
		30.15	1.72815e-12	1.18062e-13	1.42746e-12	2.07417e-13
		30.17	1.72406e-12	1.15669e-13	1.42909e-12	2.08416e-13
		30.19	1.71733e-12	1.14906e-13	1.42818e-12	2.09168e-13
		30.21	1.71556e-12	1.13527e-13	1.42955e-12	2.08892e-13
		30.23	1.71777e-12	1.12876e-13	1.4258e-12	2.07633e-13
		30.25	1.715e-12	1.16153e-13	1.42763e-12	2.08061e-13
		30.27	1.71062e-12	1.12382e-13	1.42964e-12	2.10063e-13
		30.29	1.70904e-12	1.14757e-13	1.42178e-12	2.07619e-13
		30.31	1.70879e-12	1.1427e-13	1.42708e-12	2.09566e-13
		30.33	1.70851e-12	1.13756e-13	1.42699e-12	2.0976e-13
		30.35	1.7083e-12	1.1516e-13	1.42475e-12	2.06289e-13
		30.37	1.70711e-12	1.13816e-13	1.42103e-12	2.07098e-13
		30.39	1.70365e-12	1.13899e-13	1.425e-12	2.11203e-13
		30.41	1.69504e-12	1.14239e-13	1.42053e-12	2.09968e-13
		30.43	1.69641e-12	1.14439e-13	1.41594e-12	2.13997e-13
		30.45	1.69682e-12	1.15529e-13	1.41216e-12	2.10736e-13
		30.47	1.69666e-12	1.15251e-13	1.41179e-12	2.11298e-13
		30.49	1.69704e-12	1.15614e-13	1.41064e-12	2.08879e-13
		30.51	1.69382e-12	1.135e-13	1.41482e-12	2.09858e-13
		30.53	1.68905e-12	1.15237e-13	1.41489e-12	2.0809e-13
		30.55	1.6912e-12	1.13706e-13	1.41354e-12	2.10552e-13
		30.57	1.68749e-12	1.14211e-13	1.41157e-12	2.09355e-13
		30.59	1.68786e-12	1.14643e-13	1.41715e-12	2.09441e-13
		30.61	1.68999e-12	1.14709e-13	1.40742e-12	2.10994e-13
		30.63	1.67836e-12	1.13407e-13	1.40639e-12	2.11538e-13
		30.65	1.68702e-12	1.15568e-13	1.40716e-12	2.10508e-13
		30.67	1.68927e-12	1.13696e-13	1.40752e-12	2.1055e-13
		30.69	1.68637e-12	1.15696e-13	1.40803e-12	2.10781e-13
		30.71	1.68372e-12	1.11762e-13	1.40635e-12	2.12812e-13
		30.73	1.68017e-12	1.13316e-13	1.4068e-12	2.13993e-13
		30.75	1.68009e-12	1.13824e-13	1.40858e-12	2.13468e-13
		30.77	1.67793e-12	1.1268e-13	1.40731e-12	2.14805e-13
		30.79	1.67154e-12	1.1327e-13	1.40535e-12	2.15995e-13
		30.81	1.67471e-12	1.16092e-13	1.39829e-12	2.12583e-13
		30.83	1.67225e-12	1.13155e-13	1.39819e-12	2.12598e-13
		30.85	1.66941e-12	1.1216e-13	1.39838e-12	2.14503e-13
		30.87	1.66508e-12	1.13167e-13	1.40544e-12	2.13134e-13
		30.89	1.66492e-12	1.11684e-13	1.40283e-12	2.1544e-13
		30.91	1.67542e-12	1.10409e-13	1.39945e-12	2.13969e-13
		30.93	1.66846e-12	1.13014e-13	1.4044e-12	2.14175e-13
		30.95	1.67079e-12	1.11912e-13	1.40356e-12	2.1398e-13
		30.97	1.66787e-12	1.1171e-13	1.40206e-12	2.14385e-13
		30.99	1.66739e-12	1.1268e-13	1.39402e-12	2.16501e-13
		31.01	1.66056e-12	1.12827e-13	1.40293e-12	2.15691e-13
		31.03	1.66465e-12	1.13357e-13	1.39963e-12	2.16238e-13
		31.05	1.66214e-12	1.10783e-13	1.39717e-12	2.13826e-13
		31.07	1.65794e-12	1.1685e-13	1.39814e-12	2.14364e-13
		31.09	1.65849e-12	1.15041e-13	1.39665e-12	2.10029e-13
		31.11	1.65314e-12	1.16217e-13	1.39405e-12	2.1365e-13
		31.13	1.65256e-12	1.13581e-13	1.39409e-12	2.1515e-13
		31.15	1.65752e-12	1.12255e-13	1.39663e-12	2.13591e-13
		31.17	1.65788e-12	1.12564e-13	1.38844e-12	2.14984e-13
		31.19	1.64683e-12	1.13e-13	1.39121e-12	2.14121e-13
		31.21	1.6507e-12	1.11117e-13	1.38924e-12	2.15936e-13
		31.23	1.64758e-12	1.09424e-13	1.38618e-12	2.15465e-13
		31.25	1.65162e-12	1.12084e-13	1.38888e-12	2.17205e-13
		31.27	1.64528e-12	1.12251e-13	1.38417e-12	2.12887e-13
		31.29	1.64504e-12	1.1305e-13	1.38369e-12	2.15207e-13
		31.31	1.64248e-12	1.11211e-13	1.38951e-12	2.15573e-13
		31.33	1.63949e-12	1.12896e-13	1.38857e-12	2.13747e-13
		31.35	1.64297e-12	1.11333e-13	1.38658e-12	2.15846e-13
		31.37	1.63759e-12	1.11671e-13	1.3888e-12	2.14473e-13
		31.39	1.63869e-12	1.10042e-13	1.38185e-12	2.17154e-13
		31.41	1.63625e-12	1.1024e-13	1.38159e-12	2.13663e-13
		31.43	1.63626e-12	1.10921e-13	1.382e-12	2.14997e-13
		31.45	1.63154e-12	1.11496e-13	1.38399e-12	2.14772e-13
		31.47	1.63005e-12	1.3969e-13	1.38502e-12	2.12488e-13
		31.49	1.62656e-12	1.34935e-13	1.38027e-12	2.15778e-13
		31.51	1.6246e-12	1.35102e-13	1.3832e-12	2.14192e-13
		31.53	1.62829e-12	1.34528e-13	1.38248e-12	2.15304e-13
		31.55	1.62423e-12	1.35521e-13	1.38228e-12	2.14752e-13
		31.57	1.62632e-12	1.3448e-13	1.37631e-12	2.11161e-13
		31.59	1.61734e-12	1.36639e-13	1.37382e-12	2.14162e-13
		31.61	1.616e-12	1.36779e-13	1.37523e-12	2.15407e-13
		31.63	1.61318e-12	1.36575e-13	1.37331e-12	2.15709e-13
		31.65	1.61077e-12	1.36646e-13	1.37495e-12	2.1644e-13
		31.67	1.60982e-12	1.36348e-13	1.37351e-12	2.15789e-13
		31.69	1.61425e-12	1.33813e-13	1.37328e-12	2.15025e-13
		31.71	1.60648e-12	1.36138e-13	1.37386e-12	2.15582e-13
		31.73	1.60588e-12	1.3605e-13	1.369e-12	2.13286e-13
		31.75	1.60782e-12	1.34045e-13	1.37357e-12	2.1354e-13
		31.77	1.60087e-12	1.34996e-13	1.37445e-12	2.14581e-13
		31.79	1.60685e-12	1.34215e-13	1.36853e-12	2.12757e-13
		31.81	1.61094e-12	1.30801e-13	1.36868e-12	2.13226e-13
		31.83	1.60602e-12	1.31477e-13	1.37508e-12	2.11491e-13
		31.85	1.60042e-12	1.30689e-13	1.3733e-12	2.13868e-13
		31.87	1.60396e-12	1.33435e-13	1.37438e-12	2.09747e-13
		31.89	1.60003e-12	1.33082e-13	1.37889e-12	2.1387e-13
		31.91	1.59624e-12	1.34531e-13	1.37242e-12	2.11769e-13
		31.93	1.59132e-12	1.36016e-13	1.36978e-12	2.1148e-13
		31.95	1.59085e-12	1.36188e-13	1.36665e-12	2.11908e-13
		31.97	1.59747e-12	1.31643e-13	1.37163e-12	2.12211e-13
		31.99	1.58918e-12	1.32958e-13	1.36843e-12	2.11046e-13
		32.01	1.59183e-12	1.33774e-13	1.36825e-12	2.1378e-13
		32.03	1.58839e-12	1.35784e-13	1.37255e-12	2.16875e-13
		32.05	1.58894e-12	1.36026e-13	1.36573e-12	2.13666e-13
		32.07	1.58726e-12	1.3378e-13	1.37416e-12	2.12844e-13
		32.09	1.59305e-12	1.33599e-13	1.37072e-12	2.13922e-13
		32.11	1.58755e-12	1.3507e-13	1.37109e-12	2.17333e-13
		32.13	1.59182e-12	1.32285e-13	1.3663e-12	2.14828e-13
		32.15	1.58512e-12	1.32474e-13	1.37066e-12	2.11899e-13
		32.17	1.5773e-12	1.33527e-13	1.3734e-12	2.14136e-13
		32.19	1.58026e-12	1.32938e-13	1.36549e-12	2.16786e-13
		32.21	1.57366e-12	1.34683e-13	1.37108e-12	2.15732e-13
		32.23	1.57687e-12	1.34479e-13	1.37115e-12	2.16429e-13
		32.25	1.58171e-12	1.33451e-13	1.36614e-12	2.1499e-13
		32.27	1.57745e-12	1.32421e-13	1.36292e-12	2.18245e-13
		32.29	1.57634e-12	1.30276e-13	1.36636e-12	2.16719e-13
		32.31	1.57327e-12	1.34155e-13	1.36346e-12	2.14189e-13
		32.33	1.57166e-12	1.32808e-13	1.36468e-12	2.17786e-13
		32.35	1.57415e-12	1.32078e-13	1.3699e-12	2.15262e-13
		32.37	1.56739e-12	1.31433e-13	1.36347e-12	2.1592e-13
		32.39	1.56861e-12	1.31059e-13	1.3636e-12	2.15653e-13
		32.41	1.56651e-12	1.2968e-13	1.36228e-12	2.15591e-13
		32.43	1.56348e-12	1.29622e-13	1.3602e-12	2.15999e-13
		32.45	1.56456e-12	1.28914e-13	1.36533e-12	2.18545e-13
		32.47	1.56273e-12	1.30111e-13	1.36341e-12	2.21811e-13
		32.49	1.56141e-12	1.31913e-13	1.36043e-12	2.19169e-13
		32.51	1.56669e-12	1.30226e-13	1.36708e-12	2.17541e-13
		32.53	1.55865e-12	1.2834e-13	1.36222e-12	2.19534e-13
		32.55	1.56547e-12	1.30901e-13	1.3627e-12	2.21709e-13
		32.57	1.5536e-12	1.31246e-13	1.36067e-12	2.225e-13
		32.59	1.55651e-12	1.29949e-13	1.3591e-12	2.22518e-13
		32.61	1.55162e-12	1.29229e-13	1.35699e-12	2.21544e-13
		32.63	1.54926e-12	1.31514e-13	1.36519e-12	2.22647e-13
		32.65	1.551e-12	1.31441e-13	1.36721e-12	2.21153e-13
		32.67	1.552e-12	1.29725e-13	1.35736e-12	2.21648e-13
		32.69	1.55629e-12	1.29744e-13	1.36238e-12	2.23168e-13
		32.71	1.5458e-12	1.32091e-13	1.3553e-12	2.24122e-13
		32.73	1.5439e-12	1.34004e-13	1.35087e-12	2.26985e-13
		32.75	1.54869e-12	1.30718e-13	1.35135e-12	2.25826e-13
		32.77	1.54858e-12	1.30578e-13	1.35903e-12	2.26154e-13
		32.79	1.55118e-12	1.27185e-13	1.3675e-12	2.28784e-13
		32.81	1.55066e-12	1.27942e-13	1.36002e-12	2.30104e-13
		32.83	1.5478e-12	1.28484e-13	1.36364e-12	2.30016e-13
		32.85	1.54379e-12	1.3173e-13	1.36327e-12	2.29724e-13
		32.87	1.54234e-12	1.31405e-13	1.3649e-12	2.33912e-13
		32.89	1.53754e-12	1.32468e-13	1.36216e-12	2.31992e-13
		32.91	1.54638e-12	1.30803e-13	1.36716e-12	2.34277e-13
		32.93	1.53273e-12	1.32215e-13	1.36098e-12	2.34372e-13
		32.95	1.5322e-12	1.31424e-13	1.36172e-12	2.3467e-13
		32.97	1.53513e-12	1.30723e-13	1.36492e-12	2.36878e-13
		32.99	1.53374e-12	1.3538e-13	1.37006e-12	2.32864e-13
		33.01	1.53134e-12	1.33798e-13	1.37096e-12	2.37168e-13
		33.03	1.52844e-12	1.30702e-13	1.37232e-12	2.3765e-13
		33.05	1.52768e-12	1.30863e-13	1.36409e-12	2.37313e-13
		33.07	1.52591e-12	1.29369e-13	1.36573e-12	2.37472e-13
		33.09	1.52502e-12	1.33759e-13	1.36473e-12	2.34958e-13
		33.11	1.53141e-12	1.31093e-13	1.36095e-12	2.38037e-13
		33.13	1.52971e-12	1.27533e-13	1.36387e-12	2.37188e-13
		33.15	1.52169e-12	1.29269e-13	1.36614e-12	2.3426e-13
		33.17	1.52284e-12	1.30347e-13	1.35514e-12	2.36604e-13
		33.19	1.53095e-12	1.29437e-13	1.35652e-12	2.36029e-13
		33.21	1.52218e-12	1.2826e-13	1.35872e-12	2.35853e-13
		33.23	1.51544e-12	1.28751e-13	1.36387e-12	2.36281e-13
		33.25	1.51197e-12	1.30771e-13	1.36799e-12	2.39293e-13
		33.27	1.51054e-12	1.28785e-13	1.36393e-12	2.41114e-13
		33.29	1.51101e-12	1.30912e-13	1.3593e-12	2.39047e-13
		33.31	1.51285e-12	1.26447e-13	1.35931e-12	2.37355e-13
		33.33	1.5123e-12	1.28408e-13	1.36065e-12	2.37795e-13
		33.35	1.50599e-12	1.27506e-13	1.35559e-12	2.39876e-13
		33.37	1.50781e-12	1.31692e-13	1.36129e-12	2.40635e-13
		33.39	1.51023e-12	1.28996e-13	1.3574e-12	2.36855e-13
		33.41	1.50549e-12	1.28684e-13	1.35343e-12	2.38978e-13
		33.43	1.50772e-12	1.31529e-13	1.3569e-12	2.39614e-13
		33.45	1.50992e-12	1.28896e-13	1.35702e-12	2.39422e-13
		33.47	1.50002e-12	1.29343e-13	1.35577e-12	2.40145e-13
		33.49	1.49867e-12	1.31396e-13	1.3526e-12	2.38722e-13
		33.51	1.49579e-12	1.32645e-13	1.34827e-12	2.38318e-13
		33.53	1.49951e-12	1.32988e-13	1.35508e-12	2.40646e-13
		33.55	1.50155e-12	1.28158e-13	1.35158e-12	2.37403e-13
		33.57	1.49372e-12	1.29915e-13	1.34878e-12	2.38398e-13
		33.59	1.49642e-12	1.28334e-13	1.35033e-12	2.37525e-13
		33.61	1.488e-12	1.34208e-13	1.34774e-12	2.3959e-13
		33.63	1.48528e-12	1.32787e-13	1.34837e-12	2.40602e-13
		33.65	1.47847e-12	1.32313e-13	1.34859e-12	2.38055e-13
		33.67	1.47517e-12	1.34971e-13	1.34444e-12	2.38093e-13
		33.69	1.47523e-12	1.37985e-13	1.34542e-12	2.40643e-13
		33.71	1.47901e-12	1.36378e-13	1.34345e-12	2.41779e-13
		33.73	1.48199e-12	1.33541e-13	1.34252e-12	2.41494e-13
		33.75	1.47686e-12	1.38041e-13	1.34484e-12	2.4015e-13
		33.77	1.47251e-12	1.34451e-13	1.34178e-12	2.41875e-13
		33.79	1.46691e-12	1.35943e-13	1.34259e-12	2.41683e-13
		33.81	1.46887e-12	1.35777e-13	1.34417e-12	2.44094e-13
		33.83	1.47432e-12	1.36993e-13	1.34084e-12	2.41486e-13
		33.85	1.47328e-12	1.34529e-13	1.34947e-12	2.41797e-13
		33.87	1.46927e-12	1.35349e-13	1.34048e-12	2.43152e-13
		33.89	1.46971e-12	1.34234e-13	1.34143e-12	2.41854e-13
		33.91	1.4634e-12	1.38314e-13	1.3406e-12	2.4246e-13
		33.93	1.46766e-12	1.36537e-13	1.33497e-12	2.41248e-13
		33.95	1.46179e-12	1.37585e-13	1.3351e-12	2.41258e-13
		33.97	1.46412e-12	1.37665e-13	1.33959e-12	2.41504e-13
		33.99	1.46669e-12	1.37906e-13	1.34373e-12	2.42322e-13
		34.01	1.454e-12	1.38052e-13	1.33986e-12	2.4248e-13
		34.03	1.4623e-12	1.38642e-13	1.33687e-12	2.41812e-13
		34.05	1.45625e-12	1.35924e-13	1.33607e-12	2.39539e-13
		34.07	1.45403e-12	1.36753e-13	1.33442e-12	2.4292e-13
		34.09	1.45629e-12	1.37222e-13	1.3312e-12	2.42723e-13
		34.11	1.45366e-12	1.35146e-13	1.33509e-12	2.44526e-13
		34.13	1.45845e-12	1.32495e-13	1.33407e-12	2.42867e-13
		34.15	1.44998e-12	1.34949e-13	1.33889e-12	2.43253e-13
		34.17	1.45226e-12	1.33601e-13	1.33728e-12	2.42798e-13
		34.19	1.45229e-12	1.37481e-13	1.332e-12	2.44408e-13
		34.21	1.44809e-12	1.36258e-13	1.32659e-12	2.43388e-13
		34.23	1.44584e-12	1.35767e-13	1.33335e-12	2.42477e-13
		34.25	1.44527e-12	1.34535e-13	1.32464e-12	2.45587e-13
		34.27	1.45226e-12	1.32355e-13	1.32841e-12	2.43011e-13
		34.29	1.44225e-12	1.34168e-13	1.32478e-12	2.45122e-13
		34.31	1.44436e-12	1.33617e-13	1.32478e-12	2.45365e-13
		34.33	1.43778e-12	1.33852e-13	1.3208e-12	2.42764e-13
		34.35	1.44062e-12	1.33e-13	1.32423e-12	2.42084e-13
		34.37	1.43929e-12	1.33634e-13	1.32077e-12	2.42303e-13
		34.39	1.44113e-12	1.33112e-13	1.3229e-12	2.41492e-13
		34.41	1.43541e-12	1.35614e-13	1.31835e-12	2.41519e-13
		34.43	1.4329e-12	1.33832e-13	1.32218e-12	2.43675e-13
		34.45	1.42926e-12	1.34224e-13	1.3194e-12	2.42292e-13
		34.47	1.43217e-12	1.33083e-13	1.31483e-12	2.40932e-13
		34.49	1.43073e-12	1.35088e-13	1.31737e-12	2.4311e-13
		34.51	1.4277e-12	1.34931e-13	1.31995e-12	2.4122e-13
		34.53	1.43382e-12	1.31305e-13	1.31435e-12	2.42294e-13
		34.55	1.42711e-12	1.36119e-13	1.31657e-12	2.42891e-13
		34.57	1.42262e-12	1.33881e-13	1.31428e-12	2.42907e-13
		34.59	1.41821e-12	1.35324e-13	1.32116e-12	2.43678e-13
		34.61	1.41807e-12	1.35064e-13	1.31815e-12	2.42182e-13
		34.63	1.42189e-12	1.37206e-13	1.31674e-12	2.41552e-13
		34.65	1.41393e-12	1.36388e-13	1.31498e-12	2.42288e-13
		34.67	1.41607e-12	1.36494e-13	1.31216e-12	2.4096e-13
		34.69	1.41607e-12	1.39349e-13	1.31163e-12	2.43352e-13
		34.71	1.40974e-12	1.3876e-13	1.31105e-12	2.42012e-13
		34.73	1.41955e-12	1.36606e-13	1.30752e-12	2.43191e-13
		34.75	1.41518e-12	1.34178e-13	1.30657e-12	2.4136e-13
		34.77	1.41329e-12	1.37348e-13	1.30971e-12	2.41123e-13
		34.79	1.40997e-12	1.35138e-13	1.30425e-12	2.39746e-13
		34.81	1.40783e-12	1.34811e-13	1.29826e-12	2.4e-13
		34.83	1.41023e-12	1.35892e-13	1.30602e-12	2.41257e-13
		34.85	1.41094e-12	1.35159e-13	1.30491e-12	2.39428e-13
		34.87	1.40652e-12	1.34597e-13	1.30287e-12	2.41916e-13
		34.89	1.4113e-12	1.3213e-13	1.30057e-12	2.40119e-13
		34.91	1.40465e-12	1.36598e-13	1.30338e-12	2.42348e-13
		34.93	1.40347e-12	1.34999e-13	1.30228e-12	2.41723e-13
		34.95	1.40685e-12	1.3775e-13	1.29927e-12	2.4102e-13
		34.97	1.40313e-12	1.34974e-13	1.29779e-12	2.4064e-13
		34.99	1.40792e-12	1.35018e-13	1.29776e-12	2.39894e-13
		35.01	1.40015e-12	1.34543e-13	1.29984e-12	2.42651e-13
		35.03	1.40511e-12	1.35706e-13	1.29566e-12	2.41409e-13
		35.05	1.3983e-12	1.36503e-13	1.30596e-12	2.42576e-13
		35.07	1.39863e-12	1.35051e-13	1.29985e-12	2.41598e-13
		35.09	1.39809e-12	1.36139e-13	1.29851e-12	2.43232e-13
		35.11	1.39834e-12	1.35276e-13	1.29469e-12	2.4239e-13
		35.13	1.39666e-12	1.34051e-13	1.2945e-12	2.40361e-13
		35.15	1.39381e-12	1.34655e-13	1.2937e-12	2.41552e-13
		35.17	1.39481e-12	1.3574e-13	1.28852e-12	2.3995e-13
		35.19	1.39442e-12	1.35108e-13	1.29286e-12	2.41066e-13
		35.21	1.38354e-12	1.3496e-13	1.2929e-12	2.3737e-13
		35.23	1.3914e-12	1.34412e-13	1.29039e-12	2.4027e-13
		35.25	1.39002e-12	1.34333e-13	1.29319e-12	2.37612e-13
		35.27	1.38944e-12	1.34954e-13	1.29029e-12	2.38066e-13
		35.29	1.38816e-12	1.35239e-13	1.29157e-12	2.4062e-13
		35.31	1.39093e-12	1.32241e-13	1.29123e-12	2.39559e-13
		35.33	1.38761e-12	1.33686e-13	1.28845e-12	2.3996e-13
		35.35	1.38497e-12	1.36342e-13	1.28922e-12	2.38806e-13
		35.37	1.38233e-12	1.35494e-13	1.28195e-12	2.39761e-13
		35.39	1.38766e-12	1.36692e-13	1.28923e-12	2.38495e-13
		35.41	1.38548e-12	1.33094e-13	1.28724e-12	2.37147e-13
		35.43	1.38041e-12	1.34467e-13	1.28657e-12	2.35479e-13
		35.45	1.38044e-12	1.35543e-13	1.28802e-12	2.35339e-13
		35.47	1.37553e-12	1.37903e-13	1.28218e-12	2.3883e-13
		35.49	1.37111e-12	1.36157e-13	1.28812e-12	2.37055e-13
		35.51	1.37706e-12	1.3592e-13	1.28259e-12	2.37971e-13
		35.53	1.37426e-12	1.37052e-13	1.28586e-12	2.37659e-13
		35.55	1.37497e-12	1.35534e-13	1.28294e-12	2.39622e-13
		35.57	1.37282e-12	1.36706e-13	1.27374e-12	2.34419e-13
		35.59	1.38031e-12	1.3746e-13	1.27985e-12	2.36461e-13
		35.61	1.37191e-12	1.34712e-13	1.27666e-12	2.38152e-13
		35.63	1.3747e-12	1.36519e-13	1.28003e-12	2.38544e-13
		35.65	1.36874e-12	1.332e-13	1.28008e-12	2.37004e-13
		35.67	1.36982e-12	1.35254e-13	1.28083e-12	2.37987e-13
		35.69	1.37198e-12	1.36678e-13	1.28255e-12	2.37358e-13
		35.71	1.3686e-12	1.34755e-13	1.27885e-12	2.3883e-13
		35.73	1.36621e-12	1.33153e-13	1.28096e-12	2.38553e-13
		35.75	1.36534e-12	1.36971e-13	1.27951e-12	2.38198e-13
		35.77	1.36359e-12	1.35842e-13	1.28216e-12	2.40692e-13
		35.79	1.35866e-12	1.35006e-13	1.28343e-12	2.38378e-13
		35.81	1.35773e-12	1.37188e-13	1.27666e-12	2.35928e-13
		35.83	1.3607e-12	1.36365e-13	1.27926e-12	2.36867e-13
		35.85	1.36191e-12	1.37133e-13	1.2773e-12	2.38593e-13
		35.87	1.3586e-12	1.37344e-13	1.27207e-12	2.4083e-13
		35.89	1.35983e-12	1.37305e-13	1.27976e-12	2.3873e-13
		35.91	1.36446e-12	1.35946e-13	1.28083e-12	2.38456e-13
		35.93	1.35749e-12	1.36972e-13	1.27492e-12	2.38201e-13
		35.95	1.35373e-12	1.35082e-13	1.27238e-12	2.38194e-13
		35.97	1.35522e-12	1.34693e-13	1.27711e-12	2.3684e-13
		35.99	1.35356e-12	1.34407e-13	1.27562e-12	2.404e-13
		36.01	1.35139e-12	1.34898e-13	1.26998e-12	2.38619e-13
		36.03	1.35077e-12	1.34145e-13	1.26882e-12	2.37609e-13
		36.05	1.34279e-12	1.33228e-13	1.26969e-12	2.36646e-13
		36.07	1.34774e-12	1.36732e-13	1.2692e-12	2.39858e-13
		36.09	1.34734e-12	1.34609e-13	1.26863e-12	2.41384e-13
		36.11	1.34488e-12	1.35007e-13	1.26902e-12	2.41078e-13
		36.13	1.35096e-12	1.31519e-13	1.26174e-12	2.38063e-13
		36.15	1.34283e-12	1.35268e-13	1.26205e-12	2.37391e-13
		36.17	1.34713e-12	1.33005e-13	1.2702e-12	2.40594e-13
		36.19	1.33717e-12	1.34579e-13	1.26369e-12	2.39624e-13
		36.21	1.34165e-12	1.31896e-13	1.2635e-12	2.37852e-13
		36.23	1.34227e-12	1.33724e-13	1.26988e-12	2.37994e-13
		36.25	1.3336e-12	1.32695e-13	1.26688e-12	2.38379e-13
		36.27	1.34058e-12	1.32561e-13	1.26188e-12	2.37958e-13
		36.29	1.33173e-12	1.3651e-13	1.26059e-12	2.37276e-13
		36.31	1.33968e-12	1.30815e-13	1.26292e-12	2.36055e-13
		36.33	1.34307e-12	1.31657e-13	1.2613e-12	2.36244e-13
		36.35	1.33715e-12	1.30582e-13	1.26278e-12	2.38721e-13
		36.37	1.33307e-12	1.33462e-13	1.25881e-12	2.37046e-13
		36.39	1.32933e-12	1.31877e-13	1.25444e-12	2.38084e-13
		36.41	1.33385e-12	1.32906e-13	1.26117e-12	2.38899e-13
		36.43	1.33093e-12	1.31623e-13	1.25826e-12	2.37686e-13
		36.45	1.33087e-12	1.37531e-13	1.25635e-12	2.38277e-13
		36.47	1.33265e-12	1.33418e-13	1.25333e-12	2.38311e-13
		36.49	1.32837e-12	1.33789e-13	1.25147e-12	2.36437e-13
		36.51	1.32511e-12	1.33474e-13	1.25537e-12	2.37363e-13
		36.53	1.32685e-12	1.35352e-13	1.25609e-12	2.41073e-13
		36.55	1.32582e-12	1.3448e-13	1.25264e-12	2.36285e-13
		36.57	1.32478e-12	1.34851e-13	1.25977e-12	2.41048e-13
		36.59	1.32362e-12	1.33631e-13	1.25233e-12	2.40677e-13
		36.61	1.32254e-12	1.3654e-13	1.25652e-12	2.41324e-13
		36.63	1.32149e-12	1.33395e-13	1.25438e-12	2.4034e-13
		36.65	1.3255e-12	1.33536e-13	1.25115e-12	2.39499e-13
		36.67	1.32426e-12	1.34676e-13	1.25172e-12	2.375e-13
		36.69	1.32304e-12	1.35183e-13	1.24817e-12	2.3822e-13
		36.71	1.31862e-12	1.34122e-13	1.24983e-12	2.41205e-13
		36.73	1.32082e-12	1.35393e-13	1.24874e-12	2.39459e-13
		36.75	1.31952e-12	1.35103e-13	1.2391e-12	2.38614e-13
		36.77	1.31585e-12	1.34944e-13	1.24236e-12	2.37015e-13
		36.79	1.3171e-12	1.34562e-13	1.24372e-12	2.36385e-13
		36.81	1.31808e-12	1.34578e-13	1.23615e-12	2.35784e-13
		36.83	1.31581e-12	1.37026e-13	1.24142e-12	2.36586e-13
		36.85	1.30957e-12	1.35498e-13	1.24056e-12	2.34333e-13
		36.87	1.31468e-12	1.35683e-13	1.23565e-12	2.35085e-13
		36.89	1.31415e-12	1.36392e-13	1.24041e-12	2.39194e-13
		36.91	1.31315e-12	1.34208e-13	1.2459e-12	2.38913e-13
		36.93	1.3103e-12	1.35818e-13	1.24008e-12	2.37696e-13
		36.95	1.31322e-12	1.33529e-13	1.24881e-12	2.37939e-13
		36.97	1.30513e-12	1.36105e-13	1.24279e-12	2.41569e-13
		36.99	1.30764e-12	1.35614e-13	1.2473e-12	2.38786e-13
		37.01	1.30506e-12	1.34533e-13	1.24622e-12	2.39009e-13
		37.03	1.30803e-12	1.32338e-13	1.24139e-12	2.39579e-13
		37.05	1.3028e-12	1.32851e-13	1.24235e-12	2.37679e-13
		37.07	1.30396e-12	1.34308e-13	1.24451e-12	2.35734e-13
		37.09	1.311e-12	1.34555e-13	1.23924e-12	2.37372e-13
		37.11	1.30133e-12	1.3535e-13	1.2457e-12	2.37796e-13
		37.13	1.30596e-12	1.32747e-13	1.24341e-12	2.33208e-13
		37.15	1.30475e-12	1.35368e-13	1.24463e-12	2.37578e-13
		37.17	1.30093e-12	1.34018e-13	1.23587e-12	2.39005e-13
		37.19	1.301e-12	1.34671e-13	1.24385e-12	2.3816e-13
		37.21	1.29856e-12	1.34194e-13	1.24331e-12	2.39059e-13
		37.23	1.2939e-12	1.34426e-13	1.23544e-12	2.39031e-13
		37.25	1.29277e-12	1.32151e-13	1.23738e-12	2.39049e-13
		37.27	1.29144e-12	1.32495e-13	1.24296e-12	2.38287e-13
		37.29	1.28945e-12	1.30749e-13	1.2402e-12	2.36055e-13
		37.31	1.28722e-12	1.30366e-13	1.24205e-12	2.38878e-13
		37.33	1.28791e-12	1.30488e-13	1.23748e-12	2.40302e-13
		37.35	1.28862e-12	1.31945e-13	1.23677e-12	2.36028e-13
		37.37	1.29323e-12	1.30041e-13	1.23868e-12	2.39196e-13
		37.39	1.27995e-12	1.3184e-13	1.23002e-12	2.38532e-13
		37.41	1.28551e-12	1.30294e-13	1.23631e-12	2.41028e-13
		37.43	1.28868e-12	1.31528e-13	1.23457e-12	2.37292e-13
		37.45	1.28577e-12	1.34562e-13	1.23517e-12	2.39982e-13
		37.47	1.28259e-12	1.32372e-13	1.23633e-12	2.37501e-13
		37.49	1.28294e-12	1.32273e-13	1.23246e-12	2.41101e-13
		37.51	1.28184e-12	1.32272e-13	1.23975e-12	2.40015e-13
		37.53	1.27905e-12	1.31957e-13	1.23135e-12	2.38953e-13
		37.55	1.28003e-12	1.33152e-13	1.22564e-12	2.39819e-13
		37.57	1.28595e-12	1.31717e-13	1.23715e-12	2.38833e-13
		37.59	1.2767e-12	1.32399e-13	1.23227e-12	2.3959e-13
		37.61	1.28365e-12	1.30283e-13	1.23621e-12	2.38961e-13
		37.63	1.2782e-12	1.33313e-13	1.22896e-12	2.39749e-13
		37.65	1.27431e-12	1.31558e-13	1.22581e-12	2.39599e-13
		37.67	1.27815e-12	1.32861e-13	1.23259e-12	2.39863e-13
		37.69	1.2748e-12	1.31189e-13	1.22443e-12	2.39865e-13
		37.71	1.26799e-12	1.322e-13	1.2282e-12	2.43757e-13
		37.73	1.26839e-12	1.32751e-13	1.22777e-12	2.42357e-13
		37.75	1.26742e-12	1.32336e-13	1.22069e-12	2.41562e-13
		37.77	1.26968e-12	1.34421e-13	1.21925e-12	2.39991e-13
		37.79	1.26956e-12	1.31379e-13	1.22093e-12	2.39896e-13
		37.81	1.26968e-12	1.33371e-13	1.22348e-12	2.42533e-13
		37.83	1.26168e-12	1.33855e-13	1.2281e-12	2.40125e-13
		37.85	1.26835e-12	1.31254e-13	1.22869e-12	2.3836e-13
		37.87	1.26485e-12	1.31062e-13	1.22077e-12	2.41419e-13
		37.89	1.26786e-12	1.30687e-13	1.22814e-12	2.39324e-13
		37.91	1.2661e-12	1.3393e-13	1.22535e-12	2.39976e-13
		37.93	1.26328e-12	1.35253e-13	1.22109e-12	2.41773e-13
		37.95	1.26501e-12	1.29448e-13	1.22427e-12	2.42417e-13
		37.97	1.26132e-12	1.31813e-13	1.22103e-12	2.38035e-13
		37.99	1.26243e-12	1.33987e-13	1.22293e-12	2.38917e-13
		38.01	1.25983e-12	1.33742e-13	1.21546e-12	2.35736e-13
		38.03	1.25655e-12	1.33515e-13	1.21954e-12	2.38561e-13
		38.05	1.25656e-12	1.33967e-13	1.21587e-12	2.40963e-13
		38.07	1.25385e-12	1.32663e-13	1.21607e-12	2.42186e-13
		38.09	1.2568e-12	1.31036e-13	1.21729e-12	2.39361e-13
		38.11	1.25056e-12	1.3341e-13	1.21246e-12	2.42155e-13
		38.13	1.25498e-12	1.30213e-13	1.21676e-12	2.39991e-13
		38.15	1.26541e-12	1.27713e-13	1.21884e-12	2.39749e-13
		38.17	1.25263e-12	1.33404e-13	1.21567e-12	2.3923e-13
		38.19	1.24962e-12	1.32051e-13	1.21457e-12	2.3901e-13
		38.21	1.25656e-12	1.32203e-13	1.21701e-12	2.40702e-13
		38.23	1.25009e-12	1.30014e-13	1.21017e-12	2.40096e-13
		38.25	1.2489e-12	1.30984e-13	1.21148e-12	2.39351e-13
		38.27	1.24361e-12	1.34258e-13	1.21235e-12	2.40512e-13
		38.29	1.23851e-12	1.30218e-13	1.20729e-12	2.39432e-13
		38.31	1.24165e-12	1.30952e-13	1.21375e-12	2.42764e-13
		38.33	1.24468e-12	1.26984e-13	1.21393e-12	2.40066e-13
		38.35	1.23844e-12	1.29622e-13	1.21292e-12	2.38391e-13
		38.37	1.2372e-12	1.30307e-13	1.20645e-12	2.41523e-13
		38.39	1.2424e-12	1.32095e-13	1.21588e-12	2.4133e-13
		38.41	1.24155e-12	1.28567e-13	1.21092e-12	2.41034e-13
		38.43	1.23826e-12	1.31387e-13	1.20835e-12	2.40168e-13
		38.45	1.24358e-12	1.28956e-13	1.21003e-12	2.40668e-13
		38.47	1.23705e-12	1.31426e-13	1.20728e-12	2.40759e-13
		38.49	1.24109e-12	1.30877e-13	1.21225e-12	2.40807e-13
		38.51	1.23533e-12	1.31741e-13	1.20957e-12	2.41413e-13
		38.53	1.23285e-12	1.33871e-13	1.19979e-12	2.40532e-13
		38.55	1.23709e-12	1.30753e-13	1.20529e-12	2.40872e-13
		38.57	1.22546e-12	1.32125e-13	1.20749e-12	2.4002e-13
		38.59	1.23206e-12	1.28725e-13	1.20703e-12	2.38483e-13
		38.61	1.22827e-12	1.28452e-13	1.19603e-12	2.4324e-13
		38.63	1.22675e-12	1.30222e-13	1.20593e-12	2.42027e-13
		38.65	1.2269e-12	1.30398e-13	1.20487e-12	2.41329e-13
		38.67	1.22725e-12	1.31986e-13	1.21099e-12	2.40797e-13
		38.69	1.22546e-12	1.31923e-13	1.20429e-12	2.40706e-13
		38.71	1.22646e-12	1.31289e-13	1.20226e-12	2.41338e-13
		38.73	1.22868e-12	1.29241e-13	1.20405e-12	2.42095e-13
		38.75	1.22898e-12	1.29828e-13	1.20058e-12	2.40795e-13
		38.77	1.22621e-12	1.3131e-13	1.2063e-12	2.41408e-13
		38.79	1.22394e-12	1.31368e-13	1.20164e-12	2.43297e-13
		38.81	1.22035e-12	1.31823e-13	1.20108e-12	2.42397e-13
		38.83	1.21722e-12	1.30662e-13	1.20321e-12	2.405e-13
		38.85	1.21312e-12	1.28958e-13	1.20468e-12	2.42632e-13
		38.87	1.21942e-12	1.30445e-13	1.19759e-12	2.42454e-13
		38.89	1.21938e-12	1.28289e-13	1.1969e-12	2.41393e-13
		38.91	1.21417e-12	1.29156e-13	1.19711e-12	2.41837e-13
		38.93	1.21469e-12	1.31713e-13	1.20477e-12	2.42364e-13
		38.95	1.2157e-12	1.31815e-13	1.2029e-12	2.38518e-13
		38.97	1.21636e-12	1.31001e-13	1.19982e-12	2.39489e-13
		38.99	1.21863e-12	1.3028e-13	1.1968e-12	2.38622e-13
		39.01	1.21787e-12	1.30998e-13	1.20012e-12	2.42193e-13
		39.03	1.21672e-12	1.31422e-13	1.19874e-12	2.39727e-13
		39.05	1.22204e-12	1.30072e-13	1.19115e-12	2.41306e-13
		39.07	1.21378e-12	1.31112e-13	1.19482e-12	2.41705e-13
		39.09	1.21621e-12	1.32676e-13	1.19542e-12	2.39659e-13
		39.11	1.21689e-12	1.32608e-13	1.19432e-12	2.41693e-13
		39.13	1.21661e-12	1.34124e-13	1.19166e-12	2.41455e-13
		39.15	1.21727e-12	1.33472e-13	1.1973e-12	2.40532e-13
		39.17	1.21628e-12	1.34708e-13	1.1918e-12	2.3988e-13
		39.19	1.21692e-12	1.34467e-13	1.20162e-12	2.39556e-13
		39.21	1.21159e-12	1.32793e-13	1.20623e-12	2.38953e-13
		39.23	1.21259e-12	1.3221e-13	1.19914e-12	2.36256e-13
		39.25	1.21295e-12	1.32848e-13	1.19862e-12	2.39551e-13
		39.27	1.2121e-12	1.31e-13	1.20241e-12	2.37768e-13
		39.29	1.21039e-12	1.30947e-13	1.20069e-12	2.38034e-13
		39.31	1.20709e-12	1.33974e-13	1.19634e-12	2.40261e-13
		39.33	1.20538e-12	1.32679e-13	1.19382e-12	2.38997e-13
		39.35	1.20434e-12	1.30034e-13	1.19266e-12	2.3937e-13
		39.37	1.19691e-12	1.24404e-13	1.1935e-12	2.40491e-13
		39.39	1.18942e-12	1.23387e-13	1.19241e-12	2.40839e-13
		39.41	1.18355e-12	1.2303e-13	1.19366e-12	2.37796e-13
		39.43	1.18449e-12	1.20022e-13	1.19877e-12	2.39774e-13
		39.45	1.1797e-12	1.25423e-13	1.19664e-12	2.39702e-13
		39.47	1.18356e-12	1.24068e-13	1.20298e-12	2.40401e-13
		39.49	1.18052e-12	1.21914e-13	1.19321e-12	2.35426e-13
		39.51	1.1779e-12	1.21939e-13	1.19254e-12	2.35482e-13
		39.53	1.17788e-12	1.2149e-13	1.19238e-12	2.40324e-13
		39.55	1.18408e-12	1.20675e-13	1.18909e-12	2.35547e-13
		39.57	1.17972e-12	1.23244e-13	1.18835e-12	2.36336e-13
		39.59	1.18054e-12	1.22933e-13	1.19086e-12	2.36554e-13
		39.61	1.17878e-12	1.23761e-13	1.1891e-12	2.37111e-13
		39.63	1.17516e-12	1.22684e-13	1.19358e-12	2.3822e-13
		39.65	1.18202e-12	1.23523e-13	1.18867e-12	2.37961e-13
		39.67	1.17682e-12	1.23004e-13	1.18774e-12	2.39361e-13
		39.69	1.17673e-12	1.24963e-13	1.18482e-12	2.37733e-13
		39.71	1.17258e-12	1.22774e-13	1.18186e-12	2.37669e-13
		39.73	1.17205e-12	1.21881e-13	1.1877e-12	2.36271e-13
		39.75	1.17384e-12	1.20625e-13	1.18391e-12	2.37716e-13
		39.77	1.1709e-12	1.21705e-13	1.18514e-12	2.36689e-13
		39.79	1.17271e-12	1.2157e-13	1.19012e-12	2.37883e-13
		39.81	1.17e-12	1.23131e-13	1.1838e-12	2.34877e-13
		39.83	1.17088e-12	1.21116e-13	1.18811e-12	2.35111e-13
		39.85	1.1688e-12	1.19382e-13	1.18433e-12	2.33762e-13
		39.87	1.17256e-12	1.21908e-13	1.18181e-12	2.36156e-13
		39.89	1.1705e-12	1.2198e-13	1.18438e-12	2.33524e-13
		39.91	1.17315e-12	1.22905e-13	1.17811e-12	2.35491e-13
[truncated: 2,967 more rows]

## Sheet: 20 ms x 10_10Hz
		Figure S1D_traces						Bar graph_Endo-Rates_10 Hz
		Time (S)	Control		Dyn 1 PRD				Ctrl	Dyn1-PRD_10Hz
			Mean	SEM	Mean	SEM		Mean	3.46e-13	1.61e-13
								SEM	4.01e-14	2.73e-14
		0.01	1.92719e-14	1.88426e-14	1.72481e-14	9.2389e-15		n number	6	6
		0.02	1.40946e-14	6.26486e-15	1.49835e-14	8.30883e-15		p-value	-	0.003
		0.03	1.74512e-14	4.05401e-15	1.66969e-14	8.74702e-15
		0.04	1.66529e-14	5.26545e-15	1.65967e-14	6.32396e-15
		0.05	2.13604e-14	5.85522e-15	1.17745e-14	9.31327e-15
		0.06	1.70516e-14	5.69538e-15	8.8779e-15	7.23212e-15
		0.07	1.88374e-14	3.00933e-15	1.01788e-14	4.06544e-15
		0.08	2.36293e-14	6.62736e-15	1.09314e-14	7.20503e-15
		0.09	1.30067e-14	4.16451e-15	1.40852e-14	7.38312e-15
		0.1	1.6119e-14	6.1116e-15	6.90047e-15	6.88012e-15
		0.11	1.88384e-14	6.37874e-15	1.12092e-14	7.21935e-15
		0.12	2.36654e-14	4.78894e-15	1.22045e-14	6.82936e-15
		0.13	1.68302e-14	5.01408e-15	1.94494e-15	8.151e-15
		0.14	1.60719e-14	6.29865e-15	6.80016e-15	6.08836e-15
		0.15	1.42296e-14	5.57484e-15	6.13206e-15	7.41203e-15
		0.16	1.42999e-14	4.68106e-15	9.68516e-15	6.86264e-15
		0.17	1.81861e-14	3.7512e-15	5.82651e-15	6.58018e-15
		0.18	1.74521e-14	3.84906e-15	4.67604e-15	9.75291e-15
		0.19	1.9257e-14	3.34163e-15	7.68764e-15	7.11214e-15
		0.2	1.86649e-14	7.77653e-15	8.44657e-15	5.51721e-15
		0.21	1.53655e-14	4.12575e-15	6.31613e-16	6.51853e-15
		0.22	1.60457e-14	3.4239e-15	2.32172e-15	7.98535e-15
		0.23	2.02959e-14	4.3081e-15	5.7323e-16	7.65629e-15
		0.24	1.37751e-14	8.73631e-15	8.23579e-15	5.27976e-15
		0.25	2.14423e-14	6.18028e-15	7.04724e-15	6.24753e-15
		0.26	1.88025e-14	4.51742e-15	4.28931e-15	5.09715e-15
		0.27	1.77252e-14	4.57153e-15	-4.8041e-15	6.80321e-15
		0.28	1.65588e-14	5.45018e-15	-5.1277e-16	7.26041e-15
		0.29	1.72505e-14	5.20163e-15	1.0554e-15	4.56742e-15
		0.3	1.26706e-14	6.40583e-15	9.717e-16	6.68239e-15
		0.31	9.70368e-15	5.20556e-15	3.31535e-17	5.17802e-15
		0.32	1.94467e-14	4.453e-15	-1.24443e-15	4.68924e-15
		0.33	1.21909e-14	4.03312e-15	-1.16571e-16	7.3626e-15
		0.34	1.36302e-14	5.39796e-15	-3.16855e-16	5.86436e-15
		0.35	1.49904e-14	4.29783e-15	2.96724e-15	7.64635e-15
		0.36	1.70349e-14	5.87685e-15	1.02182e-15	5.86956e-15
		0.37	1.53579e-14	5.8911e-15	-4.74235e-15	6.52906e-15
		0.38	1.50519e-14	5.41741e-15	-2.79171e-15	6.83276e-15
		0.39	1.36562e-14	3.31804e-15	-5.09086e-15	8.42138e-15
		0.4	7.96243e-15	4.93887e-15	-9.05216e-16	7.30299e-15
		0.41	1.57958e-14	4.58019e-15	-1.49374e-15	5.91448e-15
		0.42	1.47171e-14	4.94755e-15	-4.02016e-15	7.43172e-15
		0.43	1.37007e-14	6.32348e-15	-6.31978e-15	6.23998e-15
		0.44	1.53739e-14	5.23541e-15	-7.14636e-15	7.75755e-15
		0.45	1.17857e-14	4.65282e-15	-6.2555e-15	9.56724e-15
		0.46	1.39408e-14	5.79757e-15	-3.33045e-15	9.75238e-15
		0.47	1.19486e-14	5.63571e-15	-4.05707e-15	6.28388e-15
		0.48	1.36401e-14	6.08699e-15	-4.58533e-16	6.50925e-15
		0.49	1.04844e-14	5.84522e-15	-6.69028e-16	5.06694e-15
		0.5	1.24797e-14	6.51395e-15	9.12626e-16	7.50306e-15
		0.51	1.09858e-14	5.41542e-15	-4.8139e-15	6.70914e-15
		0.52	7.67402e-15	4.31697e-15	2.42056e-16	6.95726e-15
		0.53	1.55221e-14	6.83475e-15	7.47331e-16	7.40418e-15
		0.54	5.7188e-15	6.48598e-15	-1.09332e-15	5.23106e-15
		0.55	9.39228e-15	5.12488e-15	-9.35382e-16	7.07494e-15
		0.56	1.19258e-14	6.62678e-15	-2.47411e-15	5.42416e-15
		0.57	7.75487e-15	5.99115e-15	-4.37521e-15	6.01235e-15
		0.58	4.93777e-15	6.26061e-15	-6.45606e-15	7.1771e-15
		0.59	1.04307e-14	5.53734e-15	1.9916e-15	6.72156e-15
		0.6	9.41483e-15	4.90516e-15	6.22629e-15	7.28313e-15
		0.61	1.26128e-14	5.53477e-15	3.60014e-15	5.06951e-15
		0.62	1.04098e-14	9.35454e-15	2.78909e-15	6.2165e-15
		0.63	1.47266e-14	5.72663e-15	-3.04716e-16	7.12447e-15
		0.64	7.63359e-15	6.56135e-15	4.76926e-15	7.68153e-15
		0.65	9.67706e-15	5.40046e-15	7.11314e-16	7.8575e-15
		0.66	1.53402e-14	4.80267e-15	-2.18042e-16	8.73361e-15
		0.67	1.36316e-14	6.2104e-15	5.34507e-15	6.29792e-15
		0.68	1.40558e-14	6.70484e-15	2.13981e-15	6.4171e-15
		0.69	1.03586e-14	6.31401e-15	9.22569e-16	6.87916e-15
		0.7	1.33088e-14	5.4863e-15	1.45641e-15	8.56657e-15
		0.71	7.11194e-15	6.40756e-15	3.41977e-15	6.74553e-15
		0.72	7.63537e-15	5.64866e-15	6.05515e-15	5.22345e-15
		0.73	9.24894e-15	8.10315e-15	3.43516e-15	7.19628e-15
		0.74	9.44757e-15	6.34998e-15	2.50649e-15	6.0217e-15
		0.75	9.21248e-15	7.13406e-15	2.10721e-15	8.55977e-15
		0.76	8.49986e-15	5.64505e-15	1.37087e-15	7.14629e-15
		0.77	1.17223e-14	4.68369e-15	6.85077e-15	5.50968e-15
		0.78	7.75943e-15	4.31094e-15	1.74548e-15	6.7825e-15
		0.79	1.33162e-14	8.056e-15	4.99446e-16	5.67119e-15
		0.8	1.46304e-14	9.50474e-15	4.39973e-15	7.94517e-15
		0.81	9.37016e-15	6.43961e-15	-9.07042e-16	6.56846e-15
		0.82	9.72093e-15	5.50529e-15	-3.29406e-15	8.32187e-15
		0.83	1.35637e-14	5.27266e-15	1.47843e-15	7.55688e-15
		0.84	4.98745e-15	7.65329e-15	-3.6365e-16	8.15783e-15
		0.85	9.60612e-15	5.65892e-15	1.22715e-15	7.29107e-15
		0.86	6.82213e-15	5.47256e-15	6.7216e-15	6.89344e-15
		0.87	1.11415e-14	7.10681e-15	3.19812e-15	6.94023e-15
		0.88	1.48832e-14	5.14326e-15	7.72603e-15	7.63746e-15
		0.89	5.6496e-15	5.44551e-15	6.01799e-15	6.77046e-15
		0.9	8.94982e-15	7.05678e-15	3.88724e-15	8.83041e-15
		0.91	1.28902e-14	4.50355e-15	5.52168e-15	7.33043e-15
		0.92	1.90609e-14	7.23601e-15	1.02149e-15	6.83169e-15
		0.93	1.02325e-14	6.50838e-15	-2.05523e-15	6.81555e-15
		0.94	1.0974e-14	6.97712e-15	2.69055e-15	6.12464e-15
		0.95	1.36449e-14	6.36182e-15	-2.90974e-16	6.17924e-15
		0.96	9.07961e-15	6.35076e-15	5.27361e-15	5.37664e-15
		0.97	5.64377e-15	5.56904e-15	4.45649e-15	5.66575e-15
		0.98	5.18089e-15	6.21594e-15	3.51204e-15	6.13269e-15
		0.99	9.58937e-15	4.20981e-15	2.5483e-15	6.68986e-15
		1	7.35353e-15	6.36774e-15	-6.45691e-16	6.64864e-15
		1.01	8.52093e-15	5.20203e-15	4.86603e-15	7.09697e-15
		1.02	6.01654e-15	3.93422e-15	1.84408e-15	5.92102e-15
		1.03	8.77279e-15	5.62412e-15	1.09346e-15	7.0199e-15
		1.04	1.16368e-14	4.6487e-15	-1.31149e-15	7.57976e-15
		1.05	8.38704e-15	5.60802e-15	4.84332e-15	6.77156e-15
		1.06	1.13564e-14	7.85395e-15	1.5814e-15	7.89859e-15
		1.07	1.06149e-14	4.83164e-15	6.36212e-15	6.7054e-15
		1.08	3.10706e-15	7.83255e-15	4.63729e-15	5.03365e-15
		1.09	2.48731e-15	5.37182e-15	-2.85197e-16	6.60735e-15
		1.1	9.43674e-15	3.94037e-15	3.09376e-15	7.06229e-15
		1.11	7.64677e-15	3.97895e-15	1.05574e-15	5.78273e-15
		1.12	2.9029e-15	5.05258e-15	1.10005e-16	7.3481e-15
		1.13	1.28398e-14	3.15733e-15	1.45006e-15	8.00887e-15
		1.14	2.69897e-15	5.33963e-15	3.26405e-15	6.43822e-15
		1.15	4.90056e-15	4.26704e-15	3.04707e-15	8.66914e-15
		1.16	8.5734e-15	5.79438e-15	6.74011e-15	6.25735e-15
		1.17	1.13089e-14	7.89911e-15	4.76943e-15	6.23761e-15
		1.18	5.01574e-15	6.1956e-15	6.8917e-15	4.41169e-15
		1.19	6.69677e-15	4.08855e-15	4.17105e-15	6.86438e-15
		1.2	1.01889e-14	4.16567e-15	5.61865e-15	5.65282e-15
		1.21	6.2992e-15	5.6028e-15	1.16393e-14	5.76253e-15
		1.22	4.49247e-15	6.93399e-15	2.38281e-15	5.73086e-15
		1.23	6.31188e-15	5.03046e-15	4.1515e-16	5.16131e-15
		1.24	7.94974e-15	5.32521e-15	5.78675e-15	6.52025e-15
		1.25	1.56128e-14	5.15229e-15	8.12252e-15	5.4754e-15
		1.26	9.66275e-15	3.73723e-15	4.91178e-15	4.48363e-15
		1.27	8.75997e-15	4.0428e-15	2.50505e-15	6.51358e-15
		1.28	1.40872e-14	6.53647e-15	1.30472e-14	5.35847e-15
		1.29	6.36781e-15	5.8943e-15	1.75586e-15	5.89589e-15
		1.3	1.11587e-14	5.74227e-15	1.27074e-14	5.62111e-15
		1.31	1.2763e-14	6.49823e-15	1.24493e-14	6.68403e-15
		1.32	1.09442e-14	8.37084e-15	8.66253e-15	8.69976e-15
		1.33	1.04109e-14	7.59307e-15	8.93389e-15	7.47782e-15
		1.34	1.07843e-14	5.00348e-15	1.08142e-14	7.57368e-15
		1.35	9.69732e-15	5.82328e-15	5.05336e-15	7.04661e-15
		1.36	1.01389e-14	5.77511e-15	7.16257e-15	5.7721e-15
		1.37	1.13434e-14	6.13405e-15	9.1899e-15	7.34607e-15
		1.38	1.19984e-14	6.18131e-15	1.05172e-15	8.84915e-15
		1.39	1.01618e-14	4.65146e-15	6.69788e-15	7.63863e-15
		1.4	1.39591e-14	5.92151e-15	8.53522e-15	8.42402e-15
		1.41	9.14743e-15	6.97656e-15	6.09422e-15	8.3359e-15
		1.42	1.54759e-14	4.7567e-15	3.57688e-15	6.28415e-15
		1.43	1.84548e-14	6.69111e-15	2.98729e-15	7.87791e-15
		1.44	8.55192e-15	3.63938e-15	3.69403e-15	8.03702e-15
		1.45	7.7486e-15	3.92224e-15	4.53365e-15	5.41042e-15
		1.46	5.20153e-15	7.91804e-15	9.6494e-15	5.55835e-15
		1.47	4.04343e-15	5.70057e-15	3.64377e-15	8.65118e-15
		1.48	7.60253e-15	4.46489e-15	6.66204e-15	5.6554e-15
		1.49	9.10439e-15	4.79247e-15	2.8882e-15	6.89074e-15
		1.5	4.848e-15	6.92853e-15	1.11785e-14	6.60069e-15
		1.51	1.55837e-14	4.27268e-15	2.48949e-15	3.93243e-15
		1.52	5.33154e-15	5.09485e-15	1.5464e-15	4.30067e-15
		1.53	5.09531e-15	5.92677e-15	-5.40084e-15	5.30308e-15
		1.54	2.80263e-15	5.63963e-15	6.44331e-16	5.83766e-15
		1.55	1.25198e-14	6.46301e-15	6.02628e-16	5.63761e-15
		1.56	1.05414e-14	4.768e-15	-7.07306e-16	5.41731e-15
		1.57	3.18393e-15	6.15492e-15	-5.70555e-16	4.44997e-15
		1.58	9.63668e-15	4.44384e-15	-2.20191e-15	4.54989e-15
		1.59	2.21689e-15	6.30699e-15	-5.98905e-16	3.64048e-15
		1.6	-1.51595e-15	5.89273e-15	-4.65634e-17	6.64121e-15
		1.61	5.63392e-15	3.43009e-15	2.60293e-15	5.93475e-15
		1.62	3.75217e-15	3.40537e-15	-6.59264e-15	4.94449e-15
		1.63	4.89539e-15	6.74035e-15	-5.34739e-17	5.85524e-15
		1.64	9.87959e-15	4.97894e-15	-1.01453e-14	7.61872e-15
		1.65	5.98032e-15	3.55211e-15	-9.04545e-15	7.05342e-15
		1.66	8.36864e-15	6.42582e-15	-2.19622e-15	6.40966e-15
		1.67	1.07249e-15	5.66609e-15	-2.48564e-16	6.71712e-15
		1.68	6.48413e-15	7.20255e-15	3.57875e-16	5.1446e-15
		1.69	1.31114e-14	8.58349e-15	8.85133e-16	5.43074e-15
		1.7	1.13356e-14	9.73644e-15	2.41324e-15	5.37035e-15
		1.71	4.84761e-15	8.73155e-15	7.58908e-15	5.10569e-15
		1.72	1.00432e-14	1.13684e-14	4.75088e-16	6.16263e-15
		1.73	8.78835e-15	6.23672e-15	7.56135e-16	7.70217e-15
		1.74	9.83399e-15	7.18012e-15	3.27032e-15	4.3781e-15
		1.75	6.99241e-15	6.37735e-15	-2.95428e-15	5.28526e-15
		1.76	2.05959e-15	9.78762e-15	-1.39129e-15	3.30009e-15
		1.77	8.63896e-15	9.25977e-15	2.06172e-15	3.90256e-15
		1.78	9.5052e-15	7.51726e-15	-2.37536e-16	4.89767e-15
		1.79	1.39022e-14	6.90867e-15	-2.01137e-15	4.71298e-15
		1.8	7.3659e-15	1.12141e-14	-1.64055e-15	5.91567e-15
		1.81	9.92579e-15	7.79461e-15	-2.92001e-15	7.64375e-15
		1.82	7.70266e-15	9.6453e-15	-1.92196e-15	5.43837e-15
		1.83	8.26365e-15	9.55982e-15	2.20623e-15	5.28149e-15
		1.84	9.49518e-15	8.61527e-15	4.822e-15	5.92375e-15
		1.85	1.18676e-14	9.13111e-15	4.47657e-15	5.30855e-15
		1.86	1.09679e-14	1.57136e-14	-3.84662e-16	7.484e-15
		1.87	1.78166e-14	1.00789e-14	5.62066e-15	5.49416e-15
		1.88	1.24579e-14	8.83654e-15	6.54698e-15	5.6693e-15
		1.89	6.44854e-15	7.52684e-15	3.18694e-15	5.02048e-15
		1.9	7.43454e-15	6.58657e-15	6.23626e-15	5.37159e-15
		1.91	6.1377e-15	3.84567e-15	8.61079e-16	4.88201e-15
		1.92	-1.31096e-15	3.98493e-15	-3.64569e-15	6.00593e-15
		1.93	-2.53248e-15	6.50737e-15	3.44189e-15	4.1439e-15
		1.94	1.46701e-15	4.65057e-15	-5.18959e-15	6.04048e-15
		1.95	-8.70792e-16	7.4921e-15	-1.20678e-15	4.9236e-15
		1.96	-5.18366e-15	8.30264e-15	8.43183e-15	5.36956e-15
		1.97	-5.19234e-15	7.60594e-15	-5.43596e-16	6.63878e-15
		1.98	-3.42678e-15	7.07784e-15	-3.24631e-16	6.77842e-15
		1.99	-2.90585e-15	4.83283e-15	3.89961e-15	6.292e-15
		2	-2.76833e-15	5.90706e-15	6.65492e-15	5.08664e-15
		2.01	-1.82452e-15	6.0238e-15	7.99229e-15	5.53337e-15
		2.02	3.60099e-15	4.84078e-15	3.35006e-15	3.8594e-15
		2.03	-1.38229e-16	2.49789e-15	3.83917e-15	7.82712e-15
		2.04	-4.53191e-15	6.63747e-15	1.78601e-15	6.79171e-15
		2.05	-8.96872e-16	4.60674e-15	1.63296e-15	7.00706e-15
		2.06	2.4595e-15	4.65822e-15	5.08145e-15	6.20627e-15
		2.07	4.17687e-15	4.44933e-15	1.42856e-15	6.8427e-15
		2.08	4.18952e-15	6.26342e-15	1.44275e-15	4.27384e-15
		2.09	7.43868e-15	7.59366e-15	5.59848e-15	5.23246e-15
		2.1	6.05302e-15	7.70005e-15	2.35682e-15	6.10693e-15
		2.11	5.70324e-15	4.83612e-15	-1.23586e-16	5.78658e-15
		2.12	-1.58181e-16	2.61542e-15	5.39384e-15	5.73602e-15
		2.13	1.8834e-15	5.90157e-15	7.3055e-17	4.75829e-15
		2.14	6.62327e-16	4.07186e-15	-1.26282e-15	6.68948e-15
		2.15	4.37127e-15	3.93619e-15	-8.08688e-15	4.89944e-15
		2.16	7.24334e-15	7.05602e-15	2.00513e-15	6.33729e-15
		2.17	9.09727e-15	4.11257e-15	-1.76914e-15	4.33251e-15
		2.18	-1.04523e-15	4.3561e-15	-2.05056e-15	5.58449e-15
		2.19	9.24717e-17	6.21199e-15	2.75395e-16	5.61949e-15
		2.2	5.57356e-15	5.35711e-15	-2.35946e-15	5.6429e-15
		2.21	1.65792e-15	4.04248e-15	4.54846e-15	4.53362e-15
		2.22	2.52988e-15	2.99554e-15	2.99926e-15	4.33533e-15
		2.23	5.02819e-15	2.03197e-15	1.6501e-15	8.88259e-15
		2.24	4.55703e-15	4.40825e-15	5.0716e-15	8.37915e-15
		2.25	2.80503e-15	2.83956e-15	3.00581e-15	6.05472e-15
		2.26	-1.04083e-15	7.0643e-15	3.72064e-15	4.89307e-15
		2.27	3.56849e-15	5.65549e-15	2.25969e-15	7.17892e-15
		2.28	-1.85197e-15	4.46391e-15	2.75419e-15	2.71994e-15
		2.29	8.01735e-15	4.94977e-15	1.00897e-14	5.59038e-15
		2.3	1.31925e-15	3.11379e-15	6.41618e-15	6.23196e-15
		2.31	-7.87961e-15	6.01479e-15	4.62948e-15	7.05849e-15
		2.32	1.88189e-15	5.06449e-15	4.10541e-15	5.99554e-15
		2.33	9.48711e-16	4.18226e-15	3.26081e-15	7.05409e-15
		2.34	1.379e-15	1.50429e-15	4.50806e-15	5.6749e-15
		2.35	-1.97942e-15	5.10013e-15	4.80006e-15	3.3772e-15
		2.36	1.32633e-15	5.75781e-15	9.69285e-15	5.6828e-15
		2.37	3.48577e-15	4.46923e-15	1.08805e-14	6.66937e-15
		2.38	5.1674e-15	4.30835e-15	9.95773e-16	4.26395e-15
		2.39	-6.99412e-16	2.5809e-15	1.18294e-14	5.69988e-15
		2.4	1.82321e-15	2.65474e-15	7.1259e-15	3.25358e-15
		2.41	6.05093e-16	4.87706e-15	1.20471e-15	4.49609e-15
		2.42	2.81797e-15	3.11229e-15	-1.85104e-15	4.25869e-15
		2.43	5.77135e-15	4.05072e-15	3.9297e-15	2.00588e-15
		2.44	3.36861e-15	5.87388e-15	1.57403e-15	2.62385e-15
		2.45	9.77898e-16	5.70967e-15	1.77065e-15	2.5917e-15
		2.46	6.15487e-15	8.78714e-15	9.62186e-15	6.76657e-15
		2.47	-3.01072e-15	3.9706e-15	6.19371e-15	3.57111e-15
		2.48	-3.42601e-15	4.39858e-15	3.73591e-15	2.2441e-15
		2.49	1.87227e-15	4.1899e-15	6.41039e-16	5.16368e-15
		2.5	6.07424e-15	5.84464e-15	2.63904e-15	3.32477e-15
		2.51	2.14795e-15	3.43747e-15	1.25687e-15	4.48564e-15
		2.52	3.97902e-15	3.81912e-15	8.51389e-16	2.80873e-15
		2.53	-1.10322e-15	3.1564e-15	3.83347e-15	4.83469e-15
		2.54	2.4371e-16	1.87329e-15	-7.0424e-15	4.09664e-15
		2.55	4.28183e-16	5.73251e-15	2.03108e-15	3.26988e-15
		2.56	3.06092e-15	3.63882e-15	3.15204e-15	3.14548e-15
		2.57	-1.32169e-15	5.65146e-15	-5.61497e-15	4.2464e-15
		2.58	3.3676e-15	3.74211e-15	-2.58779e-15	4.60787e-15
		2.59	6.2845e-15	6.62794e-15	-3.02592e-15	5.7956e-15
		2.6	-1.12235e-15	4.80547e-15	2.5397e-15	5.43342e-15
		2.61	4.3429e-15	1.74167e-15	2.78926e-15	6.22467e-15
		2.62	1.22895e-15	1.69096e-15	-2.82824e-15	1.5852e-15
		2.63	7.47033e-16	1.99995e-15	-3.41183e-15	4.77281e-15
		2.64	-2.46145e-15	3.67861e-15	-4.7192e-15	4.56966e-15
		2.65	2.14972e-15	3.16478e-15	-2.02964e-15	4.87183e-15
		2.66	3.32374e-15	2.3928e-15	-4.32174e-15	4.63559e-15
		2.67	5.74014e-15	2.66793e-15	-1.91552e-15	5.15252e-15
		2.68	3.92175e-15	3.63861e-15	-3.56068e-15	4.0431e-15
		2.69	-1.51774e-15	3.68632e-15	-2.66256e-15	4.45512e-15
		2.7	9.44149e-15	4.55294e-15	3.94041e-16	5.14312e-15
		2.71	2.32395e-15	4.0772e-15	-4.16405e-15	3.77308e-15
		2.72	1.85059e-15	3.59345e-15	4.28762e-15	4.77463e-15
		2.73	-1.73996e-15	3.83353e-15	-1.02997e-15	3.48091e-15
		2.74	-6.61288e-16	2.26143e-15	5.07405e-15	6.5588e-15
		2.75	4.09396e-15	2.35046e-15	-1.67104e-16	4.35595e-15
		2.76	-1.53672e-15	2.66306e-15	3.65196e-15	4.76758e-15
		2.77	1.43548e-15	1.25729e-15	9.78602e-16	4.68514e-15
		2.78	3.56213e-15	5.27215e-15	5.40575e-16	5.45059e-15
		2.79	-3.04353e-15	4.45683e-15	-7.31334e-16	5.46273e-15
		2.8	-4.36188e-16	2.32626e-15	-1.14668e-16	3.16453e-15
		2.81	-1.83595e-15	3.63603e-15	3.20877e-15	5.41975e-15
		2.82	-3.59099e-16	3.18976e-15	-1.44132e-15	4.7705e-15
		2.83	-4.19437e-15	5.23257e-15	2.65571e-15	3.92016e-15
		2.84	-4.97394e-17	5.00132e-15	4.4919e-15	5.49195e-15
		2.85	1.91611e-15	4.60356e-15	-7.96934e-16	4.75043e-15
		2.86	-3.06405e-15	3.23388e-15	2.74575e-15	3.90701e-15
		2.87	-4.79846e-15	3.86612e-15	9.5713e-15	3.59749e-15
		2.88	-1.38994e-15	4.00873e-15	1.34744e-15	3.08074e-15
		2.89	2.79155e-15	4.96307e-15	1.02219e-16	3.95468e-15
		2.9	4.06354e-15	3.51111e-15	5.90255e-15	4.73952e-15
		2.91	-6.51629e-16	4.15714e-15	5.361e-15	3.31642e-15
		2.92	5.38647e-16	4.08359e-15	8.91365e-15	3.03218e-15
		2.93	-3.06775e-15	5.45992e-15	-2.2726e-15	3.82094e-15
		2.94	-2.96491e-15	6.17727e-15	-1.27571e-15	6.05652e-15
		2.95	-1.7282e-15	3.47707e-15	4.29727e-16	3.94901e-15
		2.96	-6.09457e-15	3.31934e-15	2.88642e-15	4.76506e-15
		2.97	-8.59233e-16	2.38145e-15	2.63859e-16	4.39539e-15
		2.98	3.65948e-15	3.54287e-15	-1.18054e-15	5.35837e-15
		2.99	-1.90771e-15	4.55496e-15	1.73209e-15	3.84857e-15
		3	-2.11416e-15	1.3812e-15	3.61752e-15	6.00722e-15
		3.01	-3.79575e-15	2.45358e-15	-5.72683e-16	5.51511e-15
		3.02	-6.35877e-16	2.74761e-15	-1.05708e-15	6.19703e-15
		3.03	-6.05256e-16	2.55154e-15	9.54651e-16	4.5961e-15
		3.04	1.70144e-16	4.95444e-15	4.00452e-16	5.16117e-15
		3.05	-1.45078e-15	1.77999e-15	2.75556e-15	4.35226e-15
		3.06	-2.41388e-15	3.20242e-15	7.10741e-15	7.87809e-15
		3.07	-6.10975e-15	2.19727e-15	-2.83041e-15	4.02199e-15
		3.08	-1.05928e-15	4.07626e-15	-3.0666e-16	4.47439e-15
		3.09	-3.26946e-15	2.30797e-15	2.95488e-15	4.70555e-15
		3.1	1.67832e-15	3.13221e-15	3.33803e-15	6.85991e-15
		3.11	3.76817e-17	3.67527e-15	-9.61312e-16	5.91459e-15
		3.12	-5.7704e-15	2.74938e-15	1.21968e-15	5.41804e-15
		3.13	-8.37482e-15	2.35489e-15	3.20301e-15	6.00013e-15
		3.14	-2.42839e-15	2.50896e-15	1.77038e-15	6.36595e-15
		3.15	-4.49503e-15	1.8276e-15	4.76368e-15	4.76816e-15
		3.16	-5.62347e-16	5.17832e-15	9.36692e-16	6.09916e-15
		3.17	-8.46232e-15	3.48199e-15	3.02954e-15	3.26134e-15
		3.18	-1.0125e-16	5.27863e-15	3.47195e-15	5.80854e-15
		3.19	-8.86823e-15	2.98638e-15	4.67389e-15	3.64078e-15
		3.2	-5.01502e-15	3.57921e-15	8.13114e-15	4.70668e-15
		3.21	-5.45e-16	3.54485e-15	-1.09339e-15	5.89212e-15
		3.22	-9.01492e-15	3.70513e-15	-2.91635e-15	3.4643e-15
		3.23	-1.95575e-15	3.10209e-15	-1.1511e-15	2.64455e-15
		3.24	-8.55627e-16	4.89676e-15	6.55899e-16	4.42974e-15
		3.25	-4.64179e-15	1.52465e-15	7.62272e-15	3.36317e-15
		3.26	-2.34006e-15	4.27373e-15	-1.22849e-16	4.01742e-15
		3.27	-3.49899e-15	2.64113e-15	1.56468e-15	4.07663e-15
		3.28	-5.38228e-15	3.39636e-15	4.99951e-15	4.28116e-15
		3.29	-2.19734e-15	3.54787e-15	1.18825e-15	7.5224e-15
		3.3	9.71337e-16	3.62053e-15	3.05162e-15	5.47676e-15
		3.31	1.03512e-15	2.89452e-15	1.73832e-15	5.28229e-15
		3.32	-4.91959e-15	3.02513e-15	-4.33265e-16	4.98864e-15
		3.33	-4.25537e-15	3.54252e-15	-5.19609e-15	6.902e-15
		3.34	-1.4216e-15	4.04214e-15	-4.6544e-16	4.55878e-15
		3.35	-3.99307e-15	3.505e-15	-3.56931e-15	6.55397e-15
		3.36	-2.11956e-16	2.37584e-15	-1.46665e-16	2.43489e-15
		3.37	-5.08463e-15	2.40967e-15	2.55977e-16	3.74647e-15
		3.38	-1.62498e-16	3.63958e-15	-1.13048e-15	3.51546e-15
		3.39	-5.51933e-15	4.67731e-15	-3.55212e-15	4.69845e-15
		3.4	-3.6253e-15	2.6532e-15	-3.56039e-15	4.02134e-15
		3.41	-1.52729e-15	3.25312e-15	-4.95661e-15	4.3044e-15
		3.42	-8.15741e-15	1.19974e-15	-8.16158e-16	4.64061e-15
		3.43	-5.1433e-15	3.56467e-15	6.66461e-16	3.78972e-15
		3.44	3.03208e-16	4.13269e-15	8.26449e-16	4.73875e-15
		3.45	-2.99604e-15	3.51735e-15	-3.08832e-15	5.2222e-15
		3.46	2.32301e-15	3.95508e-15	-4.84555e-15	2.57162e-15
		3.47	-3.14167e-15	2.95611e-15	2.62836e-15	3.59698e-15
		3.48	1.29221e-15	7.00758e-15	4.12902e-15	1.8256e-15
		3.49	-2.42771e-15	4.16116e-15	-5.10073e-15	5.19656e-15
		3.5	-2.97699e-15	3.10787e-15	-4.47121e-15	4.54387e-15
		3.51	-2.53247e-15	2.66048e-15	-5.19461e-15	2.34921e-15
		3.52	1.40266e-15	5.32417e-15	-5.78921e-15	2.64158e-15
		3.53	4.1858e-15	4.50838e-15	-1.41227e-15	3.45058e-15
		3.54	3.29515e-15	6.38634e-15	-3.04686e-15	4.45405e-15
		3.55	4.21952e-15	5.57095e-15	6.71084e-16	5.80901e-15
		3.56	-3.45183e-15	4.07845e-15	-1.73131e-17	3.02529e-15
		3.57	-1.93977e-15	3.21155e-15	-1.1041e-15	3.75206e-15
		3.58	-2.30985e-15	3.26857e-15	-1.73447e-15	2.26503e-15
		3.59	1.43705e-16	2.6703e-15	-2.60933e-16	2.44932e-15
		3.6	2.70834e-15	4.33147e-15	-8.10676e-16	3.44656e-15
		3.61	-3.56641e-15	3.21302e-15	-2.75141e-15	3.96218e-15
		3.62	-2.31339e-15	5.29439e-15	-6.33479e-15	4.30367e-15
		3.63	-5.10759e-15	3.30984e-15	-1.97169e-15	4.80472e-15
		3.64	-2.68028e-15	3.48084e-15	-2.79529e-15	5.94687e-15
		3.65	-1.05613e-15	2.72562e-15	-2.15476e-16	5.7855e-15
		3.66	-2.9329e-15	5.3616e-15	-1.46147e-15	5.75094e-15
		3.67	-2.39834e-18	5.01564e-15	-5.30038e-15	3.83776e-15
		3.68	1.03919e-15	8.1566e-15	-2.9389e-17	3.7416e-15
		3.69	-1.42788e-15	4.46548e-15	-3.27396e-15	3.66126e-15
		3.7	-3.4994e-15	5.22498e-15	-3.77536e-15	4.26609e-15
		3.71	-2.36188e-15	4.10924e-15	-1.15749e-15	4.86141e-15
		3.72	2.06959e-15	7.40134e-15	2.743e-16	3.13026e-15
		3.73	-4.18043e-15	4.11878e-15	-8.94883e-16	5.96388e-15
		3.74	-9.56303e-15	4.25937e-15	3.37326e-15	3.34898e-15
		3.75	-8.97399e-15	4.32149e-15	-5.76653e-15	6.88216e-15
		3.76	-4.22497e-16	8.53611e-15	-3.90948e-15	6.47137e-15
		3.77	2.57252e-16	9.39917e-15	-1.8709e-15	4.68251e-15
		3.78	1.83613e-15	6.8735e-15	-4.43515e-15	6.3483e-15
		3.79	-4.26239e-15	2.46271e-15	-5.27596e-15	6.16362e-15
		3.8	3.00413e-15	5.86295e-15	3.28276e-15	2.60782e-15
		3.81	-1.70163e-15	4.11341e-15	-1.94441e-15	2.45274e-15
		3.82	1.72396e-15	3.36773e-15	-3.94066e-15	4.04703e-15
		3.83	4.09e-15	4.65013e-15	3.46583e-15	1.645e-15
		3.84	4.34776e-15	5.06999e-15	-3.0047e-16	4.25925e-15
		3.85	1.72819e-15	5.88569e-15	-1.95043e-15	5.12882e-15
		3.86	4.87834e-15	7.70235e-15	-5.74624e-15	7.65738e-15
		3.87	1.32424e-15	4.55737e-15	-4.91868e-15	3.10754e-15
		3.88	-1.73901e-15	5.1414e-15	-1.05722e-14	4.36351e-15
		3.89	1.86894e-15	7.93646e-15	-5.10333e-15	4.133e-15
		3.9	1.2731e-15	8.36283e-15	-1.99824e-15	4.38558e-15
		3.91	-1.13856e-16	6.19143e-15	-2.77312e-15	4.48803e-15
		3.92	-4.27173e-15	5.24795e-15	-6.09156e-15	3.82779e-15
		3.93	5.47261e-15	6.12903e-15	-6.42399e-15	5.26089e-15
		3.94	3.58882e-15	7.92299e-15	-5.17346e-15	3.74469e-15
		3.95	-3.21988e-15	5.97139e-15	6.00454e-17	6.47017e-15
		3.96	-1.03446e-15	2.2906e-15	1.21494e-15	6.30565e-15
		3.97	-4.76089e-15	4.9901e-15	-2.52148e-15	3.31677e-15
		3.98	-1.59555e-15	3.54856e-15	6.47785e-16	3.68514e-15
		3.99	-4.37927e-16	3.72265e-15	-1.48615e-15	3.9952e-15
		4	-3.16979e-15	2.43247e-15	-4.49118e-15	3.61214e-15
		4.01	-1.62969e-15	3.29614e-15	-3.9016e-16	2.58764e-15
		4.02	1.03974e-15	3.79524e-15	-4.88055e-15	4.53864e-15
		4.03	2.42371e-15	2.08681e-15	-9.2269e-15	4.57477e-15
		4.04	-3.23926e-15	3.85988e-15	-3.5225e-15	6.2167e-16
		4.05	1.41473e-15	2.54275e-15	-4.62577e-15	5.83826e-15
		4.06	1.796e-15	3.15387e-15	-2.9125e-15	1.96418e-15
		4.07	1.80111e-15	3.75313e-15	-5.03639e-15	2.85502e-15
		4.08	-1.62337e-15	1.73269e-15	-2.85702e-15	2.35987e-15
		4.09	2.35248e-15	4.15423e-15	-1.85048e-15	3.3782e-15
		4.1	6.53893e-17	3.16526e-15	-7.33453e-15	2.75348e-15
		4.11	3.51942e-15	3.76398e-15	-9.02422e-15	4.39142e-15
		4.12	4.86639e-16	4.21751e-15	-9.13566e-15	4.97053e-15
		4.13	-1.38318e-15	3.17401e-15	-1.28491e-14	4.57854e-15
		4.14	-1.4585e-15	3.2897e-15	-1.96805e-15	4.23123e-15
		4.15	8.14632e-16	4.83678e-15	-5.25466e-15	2.87243e-15
		4.16	-2.45335e-15	3.05578e-15	-9.73537e-15	4.20821e-15
		4.17	-8.52234e-15	3.5844e-15	-1.71867e-15	2.82684e-15
		4.18	-2.21711e-16	5.57156e-15	-3.54696e-15	4.23202e-15
		4.19	-8.71353e-16	2.29959e-15	4.42925e-15	3.9632e-15
		4.2	-5.72053e-16	2.23205e-15	-2.42972e-15	5.21486e-15
		4.21	2.83912e-15	3.98581e-15	-2.7654e-15	4.19509e-15
		4.22	-2.01151e-15	4.81052e-15	-1.57866e-15	2.17546e-15
		4.23	9.66158e-16	3.024e-15	-7.87861e-16	3.12899e-15
		4.24	-2.24241e-15	3.48155e-15	1.10399e-15	4.04048e-15
		4.25	-2.17735e-16	3.31054e-15	-2.80859e-15	2.91838e-15
		4.26	-4.48387e-15	2.40564e-15	2.34509e-15	3.12413e-15
		4.27	-1.30761e-15	2.65339e-15	8.82203e-15	2.95306e-15
		4.28	1.0888e-15	2.35068e-15	3.59958e-15	3.34676e-15
		4.29	-2.55175e-15	4.63101e-15	4.64395e-15	4.16971e-15
		4.3	-4.71316e-15	1.52799e-15	-2.73039e-16	2.84236e-15
		4.31	-2.28775e-15	2.31003e-15	7.9546e-16	1.39656e-15
		4.32	-3.42192e-15	2.91475e-15	-1.00704e-15	2.658e-15
		4.33	-5.91297e-15	1.82732e-15	6.8704e-16	4.34022e-15
		4.34	-3.53844e-15	2.79219e-15	-8.91786e-16	3.30869e-15
		4.35	-8.68002e-16	1.59016e-15	3.32321e-15	2.63827e-15
		4.36	-1.49338e-15	1.68365e-15	4.44756e-15	6.10475e-15
		4.37	-3.6577e-15	1.64101e-15	1.53835e-15	3.5842e-15
		4.38	-1.05709e-15	3.38303e-15	3.37389e-15	5.15364e-15
		4.39	-7.36734e-15	3.04427e-15	1.53189e-15	1.7553e-15
		4.4	-1.24242e-15	2.81252e-15	5.78018e-15	3.27592e-15
		4.41	-2.23734e-15	3.86168e-15	2.25343e-15	4.63429e-15
		4.42	8.62932e-16	2.79595e-15	4.66744e-15	4.99957e-15
		4.43	8.57557e-16	1.1994e-15	7.27596e-15	3.03484e-15
		4.44	-4.28958e-15	3.79168e-15	3.24931e-15	2.55913e-15
		4.45	1.68525e-15	2.56625e-15	5.36961e-15	3.90426e-15
		4.46	-3.99913e-15	2.70692e-15	5.92735e-15	2.70869e-15
		4.47	1.74356e-15	1.49105e-15	3.20656e-15	4.96372e-15
		4.48	8.03358e-15	3.87455e-15	4.06571e-16	1.85641e-15
		4.49	3.9721e-15	3.69132e-15	8.65016e-16	3.42109e-15
		4.5	2.62552e-15	6.56336e-15	3.21506e-15	3.66287e-15
		4.51	1.10846e-15	4.16142e-15	1.34485e-15	2.91423e-15
		4.52	-4.01019e-15	3.0931e-15	4.34735e-15	2.52767e-15
		4.53	2.10172e-15	1.61995e-15	3.32918e-15	3.63342e-15
		4.54	-6.26163e-16	4.76673e-15	5.10713e-16	4.61889e-15
		4.55	1.52264e-15	1.77763e-15	8.91951e-15	3.25941e-15
		4.56	-4.02366e-16	2.90597e-15	9.35761e-15	5.41462e-15
		4.57	-3.15976e-15	3.70459e-15	2.587e-15	1.12801e-15
		4.58	-7.65389e-16	4.41551e-15	1.00669e-16	2.48083e-15
		4.59	5.50969e-15	1.87596e-15	2.93074e-15	1.84247e-15
		4.6	2.26968e-15	1.61663e-15	-1.14879e-15	3.98621e-15
		4.61	1.752e-15	1.69412e-15	5.4177e-15	3.07949e-15
		4.62	-3.54495e-15	1.87173e-15	-2.35294e-15	3.6267e-15
		4.63	-3.29908e-15	2.07924e-15	5.58875e-15	2.22611e-15
		4.64	2.29615e-15	3.61176e-15	3.12706e-15	1.14215e-15
		4.65	-1.30645e-15	3.23737e-15	-7.93168e-17	5.78721e-15
		4.66	-2.70955e-15	2.98718e-15	-2.46e-15	2.16668e-15
		4.67	1.55537e-15	1.36767e-15	2.2041e-15	3.83684e-15
		4.68	3.30681e-15	2.3713e-15	3.37743e-15	3.82879e-15
		4.69	-3.07009e-15	5.25405e-15	4.13807e-15	5.22343e-15
		4.7	1.97007e-16	4.89596e-15	9.16349e-15	5.41812e-15
		4.71	2.82721e-15	3.17065e-15	-2.60977e-15	3.97011e-15
		4.72	3.21983e-15	2.68346e-15	4.84827e-16	3.02668e-15
		4.73	7.62144e-15	1.46957e-15	4.90632e-15	6.29231e-15
		4.74	5.89824e-15	3.01332e-15	3.10328e-15	4.11674e-15
		4.75	8.41533e-15	3.20183e-15	3.87317e-15	5.20094e-15
		4.76	6.27483e-15	2.89315e-15	-9.33072e-17	3.6075e-15
		4.77	2.78458e-15	2.57946e-15	3.46149e-15	3.98605e-15
		4.78	3.04823e-15	2.50039e-15	9.79203e-16	2.05051e-15
		4.79	4.66457e-15	3.63827e-15	6.53114e-15	2.63099e-15
		4.8	4.3794e-15	3.14429e-15	4.05996e-15	1.37451e-15
		4.81	5.86572e-15	3.41663e-15	-3.04465e-15	5.50701e-15
		4.82	5.22187e-15	4.00553e-15	3.28523e-16	4.74984e-15
		4.83	-3.69759e-15	2.87483e-15	5.2555e-16	4.21821e-15
		4.84	-6.6758e-16	2.00596e-15	7.26345e-15	2.97694e-15
		4.85	-4.83791e-15	4.02461e-15	2.45456e-15	3.07486e-15
		4.86	-2.19609e-15	2.89817e-15	4.27304e-15	4.28673e-15
		4.87	-4.26059e-15	2.4571e-15	9.38623e-15	6.61584e-15
		4.88	-2.94586e-15	2.34183e-15	4.45093e-15	5.90076e-15
		4.89	-2.0854e-15	2.24506e-15	6.36574e-16	3.08682e-15
		4.9	2.42739e-15	1.63792e-15	-4.76014e-16	4.08619e-15
		4.91	-1.35809e-15	1.5286e-15	-5.54476e-15	3.16955e-15
		4.92	-1.01861e-15	2.94177e-15	2.49542e-15	2.08165e-15
		4.93	-1.93923e-15	2.867e-15	-5.3609e-16	2.37422e-15
		4.94	5.56576e-15	2.69375e-15	7.25615e-15	1.6567e-15
		4.95	2.28542e-15	2.35964e-15	5.79401e-15	3.25354e-15
		4.96	2.98277e-16	4.35097e-15	4.1313e-15	3.85508e-15
		4.97	1.85208e-15	4.67613e-15	5.8431e-16	3.90337e-15
		4.98	-1.70859e-16	5.07503e-15	-1.69474e-16	4.30551e-15
		4.99	-1.70205e-15	2.30309e-15	4.01753e-16	5.97237e-15
		5	9.51503e-17	2.34014e-15	-2.11521e-15	3.64513e-15
		5.01	-1.98193e-15	2.90553e-15	3.59796e-15	9.16088e-15
		5.02	3.56651e-15	2.5122e-15	-5.85813e-15	2.38081e-15
		5.03	1.54017e-15	2.42922e-15	-5.08042e-15	2.67503e-15
		5.04	3.59912e-15	1.87451e-15	-1.19065e-15	4.78973e-15
		5.05	2.65286e-16	1.71233e-15	-1.18849e-15	4.38301e-15
		5.06	2.88103e-15	1.95272e-15	6.03544e-15	4.19239e-15
		5.07	1.00804e-16	3.33952e-15	8.30498e-16	3.07684e-15
		5.08	2.07353e-15	2.96266e-15	5.57374e-15	3.81429e-15
		5.09	1.82791e-15	3.88254e-15	3.02666e-15	2.84441e-15
		5.1	2.19251e-15	2.50668e-15	-2.00916e-15	4.87043e-15
		5.11	-6.10648e-16	3.44194e-15	-6.16501e-15	2.89944e-15
		5.12	3.11362e-15	3.2983e-15	-1.88007e-15	5.90466e-15
		5.13	1.00977e-15	3.52336e-15	-1.09053e-15	7.31931e-15
		5.14	1.01242e-15	4.95671e-15	-6.20513e-15	4.89234e-15
		5.15	2.84667e-15	2.64728e-15	-1.19786e-14	6.42864e-15
		5.16	4.40169e-16	1.81869e-15	-8.51157e-15	6.61511e-15
		5.17	-1.22373e-15	2.16196e-15	7.82329e-16	5.70208e-15
		5.18	-1.85429e-15	3.53352e-15	-1.34803e-15	6.94191e-15
		5.19	-9.04789e-16	3.06667e-15	-1.17009e-15	4.76103e-15
		5.2	8.76601e-16	3.1391e-15	-5.47551e-15	5.51459e-15
		5.21	-1.35691e-15	3.41351e-15	-8.62672e-15	8.05045e-15
		5.22	-4.47864e-15	3.50122e-15	-2.07998e-15	6.72798e-15
		5.23	1.01987e-15	1.98416e-15	-3.74841e-15	5.08391e-15
		5.24	1.17377e-16	2.47032e-15	-8.1421e-15	4.04925e-15
		5.25	-6.64145e-16	1.47447e-15	-6.33841e-15	5.63019e-15
		5.26	-3.49885e-15	3.02678e-15	-3.77736e-15	6.71349e-15
		5.27	1.85508e-16	1.87348e-15	-6.85654e-15	5.12383e-15
		5.28	-4.95067e-15	4.38749e-15	-6.16282e-15	2.64367e-15
		5.29	-2.58592e-15	3.77775e-15	-7.91966e-15	4.43892e-15
		5.3	-5.60043e-15	2.79454e-15	1.17801e-15	5.12625e-15
		5.31	-6.0316e-15	2.81492e-15	-2.35711e-15	7.56418e-15
		5.32	4.32198e-15	6.19317e-15	-6.12484e-16	5.58508e-15
		5.33	-2.11339e-15	5.09979e-15	-3.79806e-15	7.04467e-15
		5.34	8.93484e-16	5.73149e-15	-3.92905e-15	7.09643e-15
		5.35	-1.72691e-15	1.64701e-15	-3.84628e-15	7.17876e-15
		5.36	-1.68721e-16	4.87084e-15	1.37617e-15	6.38071e-15
		5.37	-4.41488e-15	2.42723e-15	-4.52433e-15	5.48979e-15
		5.38	-9.90069e-16	2.24727e-15	7.80533e-16	7.33498e-15
		5.39	-4.22778e-15	1.66944e-15	4.91438e-16	5.55898e-15
		5.4	-8.45486e-16	3.37729e-15	-9.87527e-16	4.21465e-15
		5.41	-5.49699e-15	4.05707e-15	-1.00414e-15	4.04562e-15
		5.42	1.35851e-15	3.11265e-15	-1.61796e-15	7.39334e-15
		5.43	1.27276e-15	2.49717e-15	-4.62807e-15	6.8823e-15
		5.44	7.38092e-15	2.93908e-15	-6.86523e-15	6.55353e-15
		5.45	-8.83367e-16	3.26958e-15	-5.12509e-15	6.55808e-15
		5.46	4.1744e-16	3.16691e-15	-6.83738e-15	3.89978e-15
		5.47	1.16982e-15	3.01928e-15	-6.25662e-15	7.26833e-15
		5.48	5.17614e-15	1.54994e-15	-1.19218e-14	5.62149e-15
		5.49	-2.6974e-16	3.85836e-15	-5.88674e-15	6.65415e-15
		5.5	-2.09865e-15	2.80375e-15	-5.85038e-15	6.27055e-15
		5.51	6.88542e-16	3.91282e-15	-1.18424e-14	5.98275e-15
		5.52	1.65188e-15	2.54662e-15	-5.38731e-15	5.46984e-15
		5.53	2.80167e-15	1.59316e-15	-3.54708e-15	5.72638e-15
		5.54	-9.10077e-17	5.04589e-15	-1.13695e-14	4.59434e-15
		5.55	2.79051e-15	4.04454e-15	-9.85354e-15	6.10607e-15
		5.56	1.57125e-15	3.52293e-15	-8.84175e-15	5.66181e-15
		5.57	-5.13739e-16	3.26912e-15	-7.33615e-15	7.81264e-15
		5.58	-4.31337e-16	3.7971e-15	-6.98859e-15	4.84696e-15
		5.59	1.49793e-15	3.79986e-15	-6.89288e-15	5.69775e-15
		5.6	5.0701e-15	4.48644e-15	-1.13897e-14	5.04235e-15
		5.61	2.37126e-16	5.20698e-15	-1.12787e-14	7.8889e-15
		5.62	-5.43602e-15	3.52193e-15	-1.31741e-14	6.40276e-15
		5.63	-3.58384e-15	2.97405e-15	-1.11831e-14	5.95246e-15
		5.64	-4.43367e-15	3.58517e-15	-6.9378e-15	5.82337e-15
		5.65	-4.7348e-15	3.1667e-15	-4.52179e-15	5.18751e-15
		5.66	-1.15426e-16	3.16568e-15	-6.29195e-15	5.5725e-15
		5.67	-8.14781e-15	2.79721e-15	-5.85505e-15	6.0774e-15
		5.68	3.16977e-15	3.93015e-15	-7.54661e-15	6.35403e-15
		5.69	-1.9391e-15	4.32699e-15	-6.328e-15	6.06352e-15
		5.7	-6.06549e-15	4.61756e-15	-4.59508e-15	4.38477e-15
		5.71	-7.17177e-15	5.60202e-15	-2.57061e-15	4.4719e-15
		5.72	-7.21297e-15	5.25595e-15	-4.72985e-15	3.92704e-15
		5.73	-6.47771e-15	3.85074e-15	-4.0529e-15	5.12648e-15
		5.74	-3.33526e-15	4.4841e-15	-3.44507e-15	6.15099e-15
		5.75	-2.46532e-15	4.02937e-15	-7.21291e-15	5.89683e-15
		5.76	1.23763e-15	4.29649e-15	-7.40174e-15	6.22574e-15
		5.77	-5.04208e-16	2.64935e-15	2.70033e-15	4.73468e-15
		5.78	-4.11709e-16	5.54898e-15	-2.30525e-15	5.03645e-15
		5.79	-2.35786e-15	2.77133e-15	-5.39824e-15	2.91665e-15
		5.8	2.32297e-15	4.71805e-15	2.80113e-15	5.44313e-15
		5.81	-7.87734e-17	5.48551e-15	1.49272e-15	5.56787e-15
		5.82	6.19305e-15	3.52715e-15	-3.61274e-15	4.8915e-15
		5.83	4.57951e-15	4.58274e-15	5.80537e-16	5.31466e-15
		5.84	2.10776e-15	3.25873e-15	1.4162e-15	3.5553e-15
		5.85	1.00331e-15	3.83586e-15	-2.1681e-15	6.04507e-15
		5.86	1.98764e-15	4.45569e-15	-5.14857e-15	5.93468e-15
		5.87	-4.80246e-15	5.26175e-15	1.50923e-15	5.61573e-15
		5.88	2.27716e-15	2.13141e-15	1.91547e-15	5.4397e-15
		5.89	-5.51659e-15	2.92214e-15	-6.84216e-16	5.87756e-15
		5.9	-1.43896e-15	3.64287e-15	-1.91543e-15	5.04921e-15
		5.91	-1.16226e-15	2.09034e-15	9.85299e-16	4.57392e-15
		5.92	-3.6173e-15	5.48569e-15	1.45807e-15	4.39668e-15
		5.93	-2.1949e-15	4.07344e-15	-3.45187e-15	5.38149e-15
		5.94	-5.56679e-15	2.59874e-15	-4.76846e-15	6.70151e-15
		5.95	-4.0456e-15	4.4101e-15	-4.38099e-16	5.70046e-15
		5.96	1.84195e-15	4.06918e-15	-3.59068e-15	6.00604e-15
		5.97	-1.21385e-15	3.90368e-15	5.30171e-15	6.12147e-15
		5.98	-6.50616e-16	1.63885e-15	2.43645e-15	4.38193e-15
		5.99	3.9212e-15	2.62136e-15	2.66786e-16	5.29826e-15
		6	-2.15864e-15	3.11725e-15	7.64927e-16	3.18595e-15
		6.01	-2.44812e-16	2.34036e-15	-2.31967e-15	2.32959e-15
		6.02	-4.88049e-15	4.00116e-15	-3.04357e-15	5.9997e-15
		6.03	-7.8911e-15	6.81941e-15	-4.11047e-15	6.80226e-15
		6.04	-6.57735e-15	4.48992e-15	-2.15831e-15	8.83972e-15
		6.05	-9.61059e-16	2.71439e-15	-2.96484e-15	3.76682e-15
		6.06	-2.61575e-15	2.30556e-15	3.05043e-15	5.46169e-15
		6.07	1.0147e-15	4.09322e-15	2.93982e-15	8.56065e-15
		6.08	-1.74084e-15	3.44664e-15	2.38584e-15	4.32131e-15
		6.09	-1.13454e-15	2.26718e-15	-1.14548e-16	3.10125e-15
		6.1	-1.28648e-15	2.71113e-15	-5.33458e-15	3.48145e-15
		6.11	-4.54061e-15	4.77937e-15	9.63361e-16	3.56638e-15
		6.12	-4.18259e-15	2.48053e-15	1.56164e-15	4.71733e-15
		6.13	-4.51028e-15	3.45918e-15	-1.2326e-15	4.90841e-15
		6.14	7.70434e-16	2.27037e-15	-3.77603e-15	3.87474e-15
		6.15	-1.03722e-15	2.11063e-15	1.87611e-15	2.25734e-15
		6.16	-4.53404e-15	2.68845e-15	3.42389e-15	2.63981e-15
		6.17	2.02821e-15	3.37307e-15	-2.99388e-15	4.12652e-15
		6.18	-3.67127e-15	3.42545e-15	-3.34533e-15	5.70994e-15
		6.19	3.51227e-17	2.33529e-15	-3.18822e-15	8.58914e-15
		6.2	-4.02332e-15	4.49695e-15	-3.37754e-15	1.1103e-14
		6.21	1.18445e-15	4.66676e-15	-7.55672e-15	6.87722e-15
		6.22	-2.37002e-15	3.72052e-15	-9.00457e-15	9.33367e-15
		6.23	-1.5962e-15	2.47714e-15	-1.12321e-15	7.00134e-15
		6.24	-1.04729e-15	2.9586e-15	-1.71115e-15	6.74679e-15
		6.25	-1.808e-15	4.25483e-15	-5.07089e-15	6.21333e-15
		6.26	-2.52711e-15	4.12772e-15	-3.3632e-15	7.45594e-15
		6.27	-1.4684e-15	3.9226e-15	-1.82336e-15	3.54722e-15
		6.28	-2.81468e-15	3.57225e-15	4.67018e-15	3.34581e-15
		6.29	-7.45386e-15	2.45448e-15	-2.43241e-15	2.83902e-15
		6.3	-2.6064e-15	3.45133e-15	7.6092e-15	4.16845e-15
		6.31	-1.24877e-16	2.15099e-15	-1.95168e-15	4.00354e-15
		6.32	-3.74994e-15	4.29888e-15	-4.03151e-15	4.09984e-15
		6.33	-2.97373e-15	4.9683e-15	3.74237e-15	3.61892e-15
		6.34	-5.50425e-15	3.32637e-15	-5.53898e-16	2.28764e-15
		6.35	-4.1843e-15	3.75176e-15	5.89938e-15	2.64959e-15
		6.36	-4.96599e-15	4.66873e-15	-1.00146e-15	6.03712e-15
		6.37	-5.44939e-15	3.07905e-15	3.31263e-15	3.18232e-15
		6.38	-2.55285e-16	4.00819e-15	1.72018e-15	4.91614e-15
		6.39	-9.93261e-15	2.14184e-15	-4.03147e-15	2.66477e-15
		6.4	-8.3733e-16	1.441e-15	-4.62917e-15	1.29694e-15
		6.41	1.06525e-14	5.14142e-15	-2.03062e-15	3.16255e-15
		6.42	-1.3411e-15	3.3948e-15	3.96165e-15	3.06442e-15
		6.43	5.1445e-15	4.63249e-15	3.40851e-15	2.45375e-15
		6.44	-8.02077e-16	3.07165e-15	-2.65464e-15	4.16197e-15
		6.45	-3.54563e-15	3.19551e-15	6.02113e-16	3.51222e-15
		6.46	-1.19356e-15	4.07857e-15	3.59056e-15	4.67214e-15
		6.47	-5.23569e-16	2.54883e-15	-4.08108e-16	4.03197e-15
		6.48	-9.68209e-16	3.61291e-15	1.83413e-15	4.03923e-15
		6.49	1.82933e-15	1.72225e-15	5.94772e-15	3.29651e-15
		6.5	2.43597e-16	1.75094e-15	2.04229e-15	2.39203e-15
		6.51	-3.55494e-15	5.65701e-15	2.81062e-15	4.07696e-15
		6.52	-2.85785e-15	3.29523e-15	1.02755e-14	3.90874e-15
		6.53	1.11616e-15	3.90025e-15	2.2541e-15	3.60331e-15
		6.54	-3.09014e-15	5.43127e-15	1.04465e-14	4.74774e-15
		6.55	1.24012e-15	2.19581e-15	2.89611e-15	5.33889e-15
		6.56	-3.30033e-15	3.10256e-15	1.22522e-15	1.63232e-15
		6.57	-6.70336e-15	5.12196e-15	-2.85327e-15	2.54548e-15
		6.58	-3.21162e-15	2.75249e-15	-3.00455e-15	3.75256e-15
		6.59	-9.42103e-15	5.93197e-15	2.65347e-15	1.73056e-15
		6.6	-7.67288e-15	4.38807e-15	-1.42467e-15	2.82259e-15
		6.61	-7.15805e-15	4.55816e-15	-5.82606e-15	2.43446e-15
		6.62	-4.92432e-15	3.00581e-15	4.95859e-16	1.37903e-15
		6.63	-4.25188e-15	5.42736e-15	-1.33317e-15	2.67973e-15
		6.64	-5.02289e-15	2.48841e-15	1.59493e-15	1.20772e-15
		6.65	-7.22797e-15	4.66085e-15	8.4703e-16	4.92629e-15
		6.66	-5.29243e-15	3.73242e-15	-1.30257e-15	4.27048e-15
		6.67	-4.13042e-15	1.96845e-15	-1.09172e-15	3.73603e-15
		6.68	-3.59428e-15	4.71341e-15	5.65849e-15	4.82727e-15
		6.69	-3.53313e-15	3.05348e-15	-2.59869e-15	5.58866e-15
		6.7	-7.03726e-15	5.19133e-15	6.93027e-16	3.58261e-15
		6.71	-5.1222e-15	7.82588e-15	2.47131e-15	4.3287e-15
		6.72	-2.20751e-15	4.28307e-15	3.78016e-16	1.95374e-15
		6.73	-2.87958e-15	4.04412e-15	5.70544e-15	3.60508e-15
		6.74	-5.14548e-15	4.79216e-15	2.51428e-15	4.86713e-15
		6.75	-1.54344e-15	2.1549e-15	2.58193e-16	7.73214e-15
		6.76	-1.83383e-15	4.40991e-15	1.06667e-16	6.42404e-15
		6.77	-2.58341e-15	4.99325e-15	6.42614e-15	7.26313e-15
		6.78	3.8309e-15	2.3078e-15	5.70675e-15	9.00239e-15
		6.79	-6.31233e-15	5.32622e-15	2.50308e-15	5.50938e-15
		6.8	-3.38258e-15	3.0626e-15	2.19991e-15	7.60062e-15
		6.81	-8.48196e-15	6.90849e-15	2.48109e-16	5.30386e-15
		6.82	-8.97757e-15	5.01396e-15	3.57185e-15	3.02209e-15
		6.83	-7.35097e-15	5.81852e-15	3.64476e-15	5.95883e-15
		6.84	-7.91643e-15	4.73717e-15	-4.22243e-15	3.95572e-15
		6.85	-8.7771e-15	5.18708e-15	-5.95836e-15	4.06387e-15
		6.86	-6.39556e-15	4.98293e-15	-6.42374e-15	2.83084e-15
		6.87	-2.11648e-15	5.03307e-15	-6.73936e-15	2.94299e-15
		6.88	-2.40002e-15	5.06287e-15	1.13668e-15	2.69142e-15
		6.89	-6.21377e-15	4.89413e-15	1.9887e-15	4.86867e-15
		6.9	-2.89993e-15	2.88908e-15	-2.84307e-16	2.25997e-15
		6.91	-4.52327e-15	7.98069e-15	-4.48054e-15	4.18616e-15
		6.92	-5.75295e-15	3.26226e-15	-5.39923e-15	4.12312e-15
		6.93	-4.04358e-15	6.75161e-15	8.65616e-16	6.74847e-15
		6.94	-8.35501e-15	6.69631e-15	-5.17761e-16	7.59469e-15
		6.95	-3.84612e-15	8.10066e-15	-5.40736e-16	6.32633e-15
		6.96	-1.58678e-15	6.35907e-15	-1.95355e-15	6.50023e-15
		6.97	-2.3983e-15	5.80057e-15	-2.16671e-15	6.48312e-15
		6.98	-5.4075e-15	7.66474e-15	-2.92029e-15	6.20319e-15
		6.99	-8.68063e-15	5.56757e-15	-1.86303e-15	6.57299e-15
		7	-1.08711e-14	5.95488e-15	8.83746e-15	9.98532e-15
		7.01	-9.71869e-15	3.52257e-15	5.96507e-16	8.10244e-15
		7.02	-1.06153e-14	6.99789e-15	-1.48274e-15	8.32225e-15
		7.03	-7.68808e-15	3.54432e-15	-1.05384e-15	9.66033e-15
		7.04	-4.00212e-15	4.87811e-15	-3.74746e-16	9.57995e-15
		7.05	-4.13318e-15	4.32068e-15	-3.17855e-15	6.95068e-15
		7.06	-7.17327e-15	4.07348e-15	-4.66191e-15	5.21643e-15
		7.07	-1.76601e-15	5.63192e-15	-2.0793e-15	6.66551e-15
		7.08	-6.51554e-15	6.68946e-15	-1.65805e-15	5.09532e-15
		7.09	-2.34842e-15	4.43923e-15	-7.97121e-15	3.62488e-15
		7.1	-6.37817e-15	5.16254e-15	-3.05973e-15	4.05185e-15
		7.11	-7.57317e-15	3.54919e-15	-4.34664e-15	2.03223e-15
		7.12	-4.23196e-15	3.98501e-15	3.29549e-15	4.52296e-15
		7.13	-8.35551e-15	4.53562e-15	-1.54012e-15	7.25467e-15
		7.14	-2.49167e-15	3.137e-15	1.22697e-15	8.02456e-15
		7.15	-8.59488e-16	6.46605e-15	-1.96074e-15	8.08883e-15
		7.16	-4.67179e-15	4.76863e-15	-8.84861e-15	3.86719e-15
		7.17	-5.16883e-15	4.582e-15	-6.50371e-15	3.05771e-15
		7.18	-4.60765e-15	1.47419e-15	-4.49369e-15	1.90131e-15
		7.19	-9.31505e-15	4.96823e-15	-1.69361e-15	4.44564e-15
		7.2	-6.90115e-16	1.95044e-15	-1.37845e-14	5.60785e-15
		7.21	6.37901e-16	3.09212e-15	-6.571e-15	4.31182e-15
		7.22	-3.7951e-15	3.06803e-15	-6.21342e-15	2.93737e-15
		7.23	-4.98626e-15	2.38731e-15	-7.80469e-15	3.71572e-15
		7.24	-4.34085e-15	3.84074e-15	1.54556e-15	5.05924e-15
		7.25	-3.05407e-15	2.01982e-15	-3.45709e-16	2.43359e-15
		7.26	-3.74996e-16	2.80204e-15	4.37965e-15	5.02857e-15
		7.27	-7.35687e-15	3.83416e-15	-1.74079e-15	6.03305e-15
		7.28	-7.60822e-15	3.65276e-15	-6.76219e-16	3.34185e-15
		7.29	-1.87543e-15	2.50324e-15	3.79899e-15	3.51149e-15
		7.3	-1.31787e-15	3.36816e-15	-2.062e-15	4.87202e-15
		7.31	-8.30762e-15	4.4822e-15	1.00302e-15	5.28997e-15
		7.32	-4.98924e-15	3.97812e-15	2.36622e-16	4.40864e-15
		7.33	-3.33614e-15	5.58552e-15	8.6905e-16	3.93634e-15
		7.34	-4.73778e-15	4.15646e-15	-1.04818e-15	3.62557e-15
		7.35	-2.46663e-15	4.61221e-15	-3.62241e-15	5.60251e-15
		7.36	-6.99338e-17	3.32707e-15	-2.4985e-15	3.72036e-15
		7.37	3.30357e-15	3.22244e-15	4.78828e-16	3.22449e-15
		7.38	2.06851e-15	4.23427e-15	-5.04832e-15	2.52782e-15
		7.39	-1.26822e-15	4.01076e-15	3.41314e-15	4.11842e-15
		7.4	-1.92931e-15	7.07054e-15	3.31109e-16	3.59992e-15
		7.41	1.5899e-15	6.02657e-15	-6.21869e-16	3.79876e-15
		7.42	-2.61557e-15	3.90606e-15	3.28436e-15	5.78854e-15
		7.43	9.90007e-16	4.10115e-15	3.51351e-15	5.2306e-15
		7.44	-4.23297e-15	3.91926e-15	5.74558e-16	2.41435e-15
		7.45	8.52983e-16	3.99253e-15	-4.17152e-15	2.63012e-15
		7.46	-8.18613e-15	4.43655e-15	-5.81008e-15	2.96856e-15
		7.47	-6.00032e-15	6.01865e-15	-4.8515e-15	1.35215e-15
		7.48	-5.24596e-15	4.61489e-15	-1.14325e-17	4.27103e-15
		7.49	-2.96868e-15	2.6384e-15	-5.49396e-15	3.0037e-15
		7.5	-3.53873e-15	3.40103e-15	-6.7414e-15	3.8575e-15
		7.51	-7.62035e-15	3.24629e-15	4.57031e-16	2.48939e-15
		7.52	-6.54798e-15	2.30452e-15	-2.85873e-15	4.78717e-15
		7.53	-2.96484e-15	4.44072e-15	-2.22753e-15	3.12726e-15
		7.54	-5.60359e-15	2.11307e-15	-5.00245e-15	4.0772e-15
		7.55	-4.48367e-15	3.29108e-15	-9.53098e-15	3.36661e-15
		7.56	-8.80379e-15	2.55881e-15	-5.9932e-15	3.82194e-15
		7.57	-6.35304e-15	4.01556e-15	-3.33603e-15	1.82535e-15
		7.58	-6.45999e-15	4.46613e-15	-5.27515e-17	1.65112e-15
		7.59	-5.2306e-15	4.16215e-15	-5.46587e-15	3.93695e-15
		7.6	-5.2288e-15	7.23658e-15	-2.60298e-16	2.03541e-15
		7.61	-3.16237e-15	5.88732e-15	-1.70096e-15	2.8605e-15
		7.62	-9.44789e-15	5.82632e-15	-5.4666e-15	2.41138e-15
		7.63	-5.54484e-15	4.70562e-15	2.55115e-15	2.55453e-15
		7.64	-5.66053e-15	2.28379e-15	-2.21428e-15	2.54836e-15
		7.65	-5.01275e-15	3.40745e-15	5.60658e-16	4.10307e-15
		7.66	-7.28946e-15	6.62947e-15	-2.49348e-15	6.34232e-15
		7.67	-2.95055e-15	3.83914e-15	-7.07076e-16	4.12184e-15
		7.68	-4.10425e-15	2.8719e-15	-3.14198e-15	4.40774e-15
		7.69	-6.56979e-15	5.81337e-15	-6.19109e-16	3.04467e-15
		7.7	-6.89341e-15	3.97265e-15	-2.52249e-15	3.03473e-15
		7.71	-4.11198e-15	6.24221e-15	-9.294e-15	3.39317e-15
		7.72	-5.90206e-15	3.44105e-15	-2.30688e-15	3.73359e-15
		7.73	-1.19222e-14	9.411e-15	-1.11605e-15	5.09265e-15
		7.74	-8.19277e-15	3.35246e-15	-1.91762e-15	1.72309e-15
		7.75	-8.71536e-15	5.00083e-15	-5.40108e-15	4.10849e-15
		7.76	-1.05135e-14	6.56341e-15	-7.23836e-15	5.12562e-15
		7.77	-5.32761e-15	2.91348e-15	-4.75152e-15	4.7e-15
		7.78	-5.61187e-15	3.70272e-15	-4.26164e-15	4.56977e-15
		7.79	-8.1799e-15	4.10515e-15	-9.30278e-15	4.02994e-15
		7.8	-7.5854e-15	2.48968e-15	-8.98458e-16	1.64027e-15
		7.81	-5.73041e-15	1.84107e-15	-4.23274e-15	2.03583e-15
		7.82	-9.4632e-15	6.34444e-15	2.79791e-15	5.0025e-15
		7.83	-1.78398e-15	3.79981e-15	-1.57545e-15	3.59414e-15
		7.84	-1.02915e-14	7.23266e-15	-4.46857e-15	2.20092e-15
		7.85	-4.37889e-15	4.0347e-15	-4.32369e-15	3.44633e-15
		7.86	-1.05768e-14	6.58573e-15	8.01893e-16	4.59011e-15
		7.87	-4.69506e-15	2.17372e-15	7.43972e-17	5.24712e-15
		7.88	-4.66884e-15	3.42657e-15	-3.28904e-15	4.88891e-15
		7.89	-5.44501e-15	2.7276e-15	1.777e-15	3.6138e-15
		7.9	-3.70469e-15	2.1359e-15	-2.795e-15	2.75782e-15
		7.91	1.08685e-15	2.46661e-15	-4.89395e-15	3.69489e-15
		7.92	-3.04521e-16	3.28556e-15	-9.14565e-15	3.55825e-15
		7.93	-3.44131e-15	4.03727e-15	-5.17229e-15	2.29099e-15
		7.94	-2.2376e-15	2.84918e-15	-3.17915e-15	3.6339e-15
		7.95	-4.11953e-15	5.70778e-15	-3.65534e-15	5.98328e-15
		7.96	-5.0331e-15	6.7538e-15	-1.01381e-16	6.70852e-15
		7.97	-2.72153e-15	1.62564e-15	2.18389e-15	2.63001e-15
		7.98	-2.99688e-15	7.11269e-15	6.41911e-16	2.17947e-15
		7.99	-9.40376e-15	6.47385e-15	2.07739e-15	1.78065e-15
		8	-6.19197e-15	6.91218e-15	-1.52962e-15	4.20679e-15
		8.01	-1.89158e-15	5.0132e-15	-2.05385e-15	3.37119e-15
		8.02	1.68298e-15	4.20056e-15	-7.95051e-15	2.34505e-15
		8.03	-3.81688e-15	6.25441e-15	-8.42603e-16	2.92431e-15
		8.04	-4.45115e-15	4.36304e-15	-8.04168e-16	3.47914e-15
		8.05	-1.01316e-15	4.32819e-15	3.03944e-15	3.80217e-15
		8.06	-3.93183e-15	3.30933e-15	-2.55732e-15	2.05114e-15
		8.07	-2.61585e-15	5.55243e-15	-6.13985e-15	3.55991e-15
		8.08	-1.12493e-14	6.15799e-15	-3.27628e-15	2.46919e-15
		8.09	-5.70347e-15	3.73996e-15	-8.94664e-17	3.79174e-15
		8.1	-7.11394e-15	4.84747e-15	-3.37415e-15	3.49497e-15
		8.11	-1.27579e-14	7.66208e-15	-3.57423e-15	4.82207e-15
		8.12	-9.3822e-15	5.5425e-15	-3.39871e-15	4.33043e-15
		8.13	-3.86305e-15	2.74405e-15	-1.73401e-15	4.13537e-15
		8.14	-3.22621e-15	4.56713e-15	-5.74043e-15	5.65684e-15
		8.15	-5.42967e-15	2.87515e-15	-4.56134e-15	4.73883e-15
		8.16	-8.40743e-15	3.39698e-15	5.20696e-16	3.85379e-15
		8.17	-8.54404e-15	5.73286e-15	-3.4929e-15	6.87791e-15
		8.18	-7.27521e-15	4.49771e-15	-3.05738e-15	3.15409e-15
		8.19	-4.9206e-15	3.25588e-15	-4.87973e-15	3.72651e-15
		8.2	-3.04649e-15	3.14819e-15	8.17135e-16	5.44242e-15
		8.21	-8.59451e-15	4.34589e-15	-6.52394e-15	2.857e-15
		8.22	-1.45049e-14	7.43477e-15	-2.78681e-15	4.26158e-15
		8.23	-9.82964e-15	4.18881e-15	-3.95851e-15	3.55312e-15
		8.24	-6.94662e-15	3.89709e-15	-4.19114e-15	3.36676e-15
		8.25	-6.61414e-15	4.35892e-15	-2.23929e-15	2.86697e-15
		8.26	-1.20733e-14	3.31275e-15	-4.32616e-15	3.20504e-15
		8.27	-4.42077e-15	1.75475e-15	-1.70167e-15	3.89523e-15
		8.28	-1.00802e-14	8.11398e-15	-1.64394e-15	4.45295e-15
		8.29	-1.06674e-14	3.89304e-15	-9.72138e-17	3.41816e-15
		8.3	-1.38201e-14	4.97058e-15	-2.96108e-15	3.89696e-15
		8.31	-5.61495e-15	5.65205e-15	1.45202e-15	3.09846e-15
		8.32	-4.79675e-15	2.8611e-15	-1.46332e-16	2.74545e-15
		8.33	-1.76815e-15	5.22881e-15	-4.87356e-16	3.18343e-15
		8.34	-5.61214e-15	5.09607e-15	3.33281e-15	3.48033e-15
		8.35	-3.58479e-15	4.12694e-15	1.0429e-14	4.85511e-15
		8.36	-4.17212e-15	3.29595e-15	4.34988e-15	5.24985e-15
		8.37	-5.37988e-15	5.80359e-15	4.89263e-16	3.2507e-15
		8.38	-8.17458e-15	7.71977e-15	3.45163e-15	4.3584e-15
		8.39	-9.88267e-15	7.64328e-15	7.74315e-16	2.36658e-15
		8.4	-4.94459e-15	5.96264e-15	-1.1039e-15	3.34495e-15
		8.41	-5.04617e-15	5.45378e-15	-3.5495e-15	5.28265e-15
		8.42	-6.11097e-15	6.59122e-15	-2.20071e-16	5.63639e-15
		8.43	-3.77986e-15	5.68794e-15	5.52043e-15	1.28765e-15
		8.44	-5.93806e-15	7.22901e-15	-5.14683e-16	5.32701e-15
		8.45	-2.77178e-15	5.55848e-15	3.63086e-15	8.43442e-15
		8.46	-3.41548e-15	6.45562e-15	1.96126e-15	5.74438e-15
		8.47	2.32202e-15	6.0814e-15	-6.42999e-16	1.53939e-15
		8.48	-3.42269e-15	6.84759e-15	-3.24705e-16	5.05919e-15
		8.49	-2.9969e-16	5.61774e-15	4.12891e-16	3.05078e-15
		8.5	-7.81393e-15	8.19752e-15	-6.78136e-16	2.21776e-15
		8.51	-6.66337e-15	5.83709e-15	2.33456e-15	4.90936e-15
		8.52	-2.90212e-15	4.94652e-15	-2.41267e-15	5.67033e-15
		8.53	-3.57764e-15	7.37918e-15	-2.65703e-15	3.37965e-15
		8.54	-8.24611e-15	9.10538e-15	1.70498e-15	3.5529e-15
		8.55	-7.25734e-15	7.65695e-15	-1.85459e-15	4.11817e-15
		8.56	-9.4932e-15	1.04801e-14	-4.15638e-15	5.64596e-15
		8.57	-1.12213e-15	7.73432e-15	-5.01212e-15	2.13383e-15
		8.58	-4.85147e-15	7.2629e-15	-1.11714e-15	3.4169e-15
		8.59	-7.72263e-15	7.74029e-15	-5.61491e-15	4.10775e-15
		8.6	-5.81653e-15	5.77427e-15	-4.45788e-15	3.07177e-15
		8.61	-7.96764e-15	7.55701e-15	-5.54598e-15	3.10107e-15
		8.62	-7.36436e-15	5.96411e-15	1.76759e-15	3.97692e-15
		8.63	-9.08745e-15	6.05101e-15	-1.59105e-15	1.82481e-15
		8.64	-6.44818e-15	7.47167e-15	-4.97695e-15	2.99831e-15
		8.65	-5.83313e-15	6.74689e-15	-3.57126e-15	3.10888e-15
		8.66	-1.04206e-14	6.71861e-15	-1.48795e-15	5.14272e-15
		8.67	-1.04907e-14	5.71307e-15	-2.27953e-15	4.0484e-15
		8.68	-4.691e-15	4.05412e-15	-4.77058e-16	5.95214e-15
		8.69	-1.17112e-14	4.27345e-15	2.5927e-15	6.73624e-15
		8.7	-6.41709e-15	4.60672e-15	8.91707e-16	3.66622e-15
		8.71	-1.03241e-14	5.38964e-15	5.18488e-16	8.52815e-15
		8.72	-9.0574e-15	5.26076e-15	4.01175e-15	7.50076e-15
		8.73	-2.06338e-15	2.52103e-15	-3.09051e-15	2.78871e-15
		8.74	-8.14686e-15	6.51749e-15	-3.25454e-15	2.95361e-15
		8.75	-5.73018e-15	4.14735e-15	1.00252e-16	5.04793e-15
		8.76	-6.29626e-15	3.06899e-15	-2.21182e-15	9.0591e-15
		8.77	-1.0598e-14	4.01021e-15	5.96332e-15	3.74387e-15
		8.78	-7.65535e-15	3.61338e-15	-1.10743e-15	7.11917e-15
		8.79	-1.54461e-15	5.35071e-15	-4.5459e-15	4.00058e-15
		8.8	-3.47808e-15	2.81967e-15	3.29596e-15	4.71721e-15
		8.81	-5.06145e-15	4.40959e-15	1.95066e-15	4.56189e-15
		8.82	-4.49899e-15	6.43236e-15	8.28967e-17	6.17413e-15
		8.83	-8.68757e-15	3.00081e-15	5.98115e-16	6.63158e-15
		8.84	-8.19125e-15	6.08276e-15	-1.69035e-15	7.06384e-15
		8.85	-9.36321e-15	5.32991e-15	-2.67452e-16	5.65204e-15
		8.86	-3.41957e-15	4.40656e-15	-1.50884e-15	1.73694e-15
		8.87	-9.54038e-15	7.751e-15	4.7434e-16	8.35676e-15
		8.88	-1.17954e-15	3.0961e-15	2.66462e-15	5.93818e-15
		8.89	-5.58808e-15	2.92512e-15	-8.16377e-15	4.42188e-15
		8.9	-8.99897e-15	6.91588e-15	4.6086e-15	8.41408e-15
		8.91	-7.35027e-15	5.64172e-15	-2.60758e-15	7.6218e-15
		8.92	-3.58833e-15	4.15494e-15	1.75708e-15	4.12429e-15
		8.93	-6.80548e-15	7.07683e-15	1.47948e-15	7.75223e-15
		8.94	-1.13892e-14	5.04284e-15	-3.34901e-15	5.35711e-15
		8.95	-6.98811e-15	5.12615e-15	-4.49963e-15	5.38094e-15
		8.96	-9.76334e-15	5.0923e-15	-4.6448e-15	5.32136e-15
		8.97	-1.11729e-14	7.12331e-15	-3.89426e-15	4.69134e-15
		8.98	-3.25943e-15	3.99793e-15	-6.89135e-16	6.39584e-15
		8.99	-8.43254e-15	3.25026e-15	-2.96875e-15	4.06996e-15
		9	-9.89557e-15	6.84421e-15	-1.27521e-15	5.19527e-15
		9.01	-1.0555e-14	4.10092e-15	-1.37325e-14	2.58026e-15
		9.02	-5.9452e-15	5.47043e-15	-3.21502e-15	3.1902e-15
		9.03	-1.43741e-14	7.43748e-15	-4.56186e-15	4.19352e-15
		9.04	-8.4523e-15	4.66967e-15	-1.003e-14	2.90192e-15
		9.05	-6.60308e-15	2.89873e-15	-7.94457e-15	5.1296e-15
		9.06	-7.71856e-15	5.66795e-15	-1.67422e-15	4.05246e-15
		9.07	-1.1705e-14	6.43225e-15	-6.9635e-15	4.24838e-15
		9.08	-1.46716e-14	5.20858e-15	-6.2837e-15	6.63481e-15
		9.09	-1.10721e-14	5.7616e-15	2.02602e-15	5.76665e-15
		9.1	-4.39857e-15	5.91452e-15	4.74134e-15	5.59293e-15
		9.11	-1.27253e-14	4.92892e-15	-1.60559e-15	6.11989e-15
		9.12	-7.318e-15	2.23027e-15	7.74788e-15	6.33851e-15
		9.13	-7.9934e-15	5.09708e-15	-4.09774e-15	4.22077e-15
		9.14	-6.95899e-15	1.85068e-15	1.37199e-15	4.38219e-15
		9.15	-3.01731e-15	4.51654e-15	8.45816e-16	3.18643e-15
		9.16	-1.20474e-14	2.22383e-15	8.40786e-16	5.77635e-15
		9.17	-9.05687e-15	2.7067e-15	4.81933e-15	5.10034e-15
		9.18	-1.28068e-14	5.31248e-15	-2.95234e-15	4.81996e-15
		9.19	-1.09694e-14	2.93891e-15	3.15894e-15	5.57748e-15
		9.2	-1.06856e-14	3.63292e-15	-6.13392e-16	5.70131e-15
		9.21	-1.10521e-14	4.59127e-15	-3.27421e-15	5.46549e-15
		9.22	-9.2067e-15	2.70622e-15	-3.59618e-15	7.82697e-15
		9.23	-1.12436e-14	1.91499e-15	-1.02362e-15	5.47095e-15
		9.24	-8.9014e-15	4.29755e-15	-1.27038e-16	6.5467e-15
		9.25	-1.57395e-14	9.45452e-15	-3.55562e-15	9.26388e-15
		9.26	-1.00027e-14	2.62284e-15	-4.2696e-16	7.41179e-15
		9.27	-1.18874e-14	4.6908e-15	6.75733e-17	6.05544e-15
		9.28	-8.25661e-15	5.15395e-15	3.24672e-16	5.1145e-15
		9.29	-1.44339e-14	5.0471e-15	-4.64795e-16	6.14641e-15
		9.3	-9.22363e-15	7.26502e-15	7.89816e-16	7.50799e-15
		9.31	-1.49426e-14	3.17041e-15	-1.79612e-15	3.93953e-15
		9.32	-1.49043e-14	5.61375e-15	-5.71931e-16	8.94255e-15
		9.33	-1.38523e-14	6.10732e-15	-2.63422e-15	7.60463e-15
		9.34	-8.60744e-15	3.25618e-15	-4.63838e-15	5.79758e-15
		9.35	-1.39151e-14	6.28581e-15	4.46203e-15	3.62425e-15
		9.36	-1.08629e-14	5.43898e-15	-1.77147e-15	4.95838e-15
		9.37	-1.17998e-14	6.61323e-15	-2.29709e-15	2.58378e-15
		9.38	-9.15282e-15	5.39074e-15	-1.9968e-16	4.80255e-15
		9.39	-1.65242e-14	4.99002e-15	-6.33683e-15	4.41813e-15
		9.4	-1.1396e-14	3.12347e-15	1.05286e-16	5.69778e-15
		9.41	-1.3405e-14	2.67826e-15	4.70604e-15	6.08092e-15
		9.42	-1.04706e-14	3.90433e-15	1.31475e-15	5.97066e-15
		9.43	-1.14206e-14	3.66802e-15	-3.20763e-15	4.65033e-15
		9.44	-2.1151e-14	8.14483e-15	-1.68121e-15	3.44169e-15
		9.45	-8.68459e-15	5.24772e-15	-2.44407e-15	4.40283e-15
		9.46	-1.00123e-14	2.4516e-15	-2.9254e-15	7.41185e-15
		9.47	-1.12457e-14	4.62155e-15	-1.46686e-15	7.23008e-15
		9.48	-1.07606e-14	1.66941e-15	8.8105e-16	3.82453e-15
		9.49	-1.49247e-14	2.83879e-15	1.79619e-15	6.09174e-15
		9.5	-8.0206e-15	4.28045e-15	-2.87627e-15	1.00125e-14
		9.51	-1.45931e-14	3.15669e-15	3.19926e-16	6.57571e-15
		9.52	-1.10968e-14	6.15985e-15	-4.86604e-15	6.36123e-15
		9.53	-1.44807e-14	7.21328e-15	-6.35882e-15	4.35815e-15
		9.54	-1.91421e-14	6.66099e-15	2.5421e-15	5.52439e-15
		9.55	-1.5235e-14	4.71585e-15	4.52618e-15	5.17691e-15
		9.56	-1.06213e-14	4.89222e-15	1.47578e-15	8.9329e-15
		9.57	-1.67736e-14	4.81409e-15	3.43088e-16	3.70965e-15
		9.58	-1.22406e-14	4.01769e-15	9.74723e-16	5.4474e-15
		9.59	-1.12923e-14	5.89633e-15	1.35064e-15	4.3743e-15
		9.6	-1.46076e-14	6.80239e-15	3.2212e-16	4.95605e-15
		9.61	-1.61775e-14	5.3298e-15	-2.11227e-15	7.07565e-15
		9.62	-1.03415e-14	4.32098e-15	-1.03437e-15	6.49515e-15
		9.63	-1.64646e-14	7.1321e-15	4.31269e-15	8.15573e-15
		9.64	-1.11093e-14	4.15944e-15	2.3429e-15	8.86008e-15
		9.65	-5.2747e-15	3.70376e-15	2.57584e-15	9.78369e-15
		9.66	-1.10234e-14	3.54495e-15	-1.25039e-16	7.76534e-15
		9.67	-6.57145e-15	3.74626e-15	-3.46387e-15	7.08475e-15
		9.68	-8.18416e-15	2.65191e-15	4.77708e-15	4.1007e-15
		9.69	-1.3827e-14	4.27599e-15	1.96061e-15	6.7289e-15
		9.7	-1.69723e-14	5.0044e-15	-2.79574e-15	7.60635e-15
		9.71	-5.32126e-15	3.70748e-15	-1.07262e-14	6.4848e-15
		9.72	-1.07147e-14	3.78283e-15	-5.6064e-16	6.50433e-15
		9.73	-1.01169e-14	4.71246e-15	-3.06562e-15	2.88977e-15
		9.74	-1.00283e-14	2.27862e-15	-2.25733e-15	3.60031e-15
		9.75	-1.26521e-14	3.34893e-15	-3.50085e-15	5.99878e-15
		9.76	-1.91343e-14	7.07014e-15	-7.35628e-15	4.81399e-15
		9.77	-1.96115e-14	4.5062e-15	-6.33417e-15	5.26249e-15
		9.78	-1.48679e-14	5.91994e-15	-6.01353e-15	4.78209e-15
		9.79	-1.27894e-14	1.51472e-15	-1.74914e-15	6.74587e-15
		9.8	-1.20837e-14	4.29014e-15	-8.93486e-17	4.74619e-15
		9.81	-1.43511e-14	6.5712e-15	-4.14139e-15	5.13856e-15
		9.82	-1.29726e-14	5.7676e-15	-7.3183e-16	5.97593e-15
		9.83	-8.44217e-15	2.46734e-15	-1.51631e-15	5.07744e-15
		9.84	-1.05355e-14	4.31116e-15	-3.38427e-15	7.36891e-15
		9.85	-1.48077e-14	3.37432e-15	1.0049e-15	7.17458e-15
		9.86	-1.67449e-14	5.28122e-15	-5.80864e-15	5.20163e-15
		9.87	-1.24537e-14	6.86715e-15	-1.55652e-15	6.71375e-15
		9.88	-1.57727e-14	6.82637e-15	-1.36997e-15	5.35607e-15
		9.89	-1.51532e-14	3.92718e-15	-7.79567e-15	2.73156e-15
		9.9	-1.17718e-14	5.13004e-15	-2.75133e-15	3.83735e-15
		9.91	-1.72735e-14	6.8014e-15	2.22004e-15	3.14204e-15
		9.92	-1.78105e-14	8.40247e-15	-1.80155e-15	5.27782e-15
		9.93	-1.95943e-14	5.97785e-15	-6.1098e-15	5.36888e-15
		9.94	-1.33848e-14	2.68833e-15	-4.65627e-15	3.34647e-15
		9.95	-1.70915e-14	7.86988e-15	3.29107e-16	4.8662e-15
		9.96	-1.94923e-14	8.14672e-15	-4.74294e-15	3.83691e-15
		9.97	-1.10172e-14	3.90016e-15	-5.8308e-15	2.27002e-15
		9.98	-1.27241e-14	8.56057e-15	-2.56456e-15	4.1569e-15
		9.99	-1.22156e-14	6.83469e-15	-1.94738e-15	4.6827e-15
		10
		10.01
		10.02
		10.03
		10.04
		10.05
		10.06
		10.07
		10.08
		10.09
		10.1
		10.11
		10.12
		10.13
		10.14
		10.15
		10.16
		10.17
		10.18
		10.19
		10.2
		10.21
		10.22
		10.23
		10.24
		10.25
		10.26
		10.27
		10.28	5.23466e-13	4.87195e-14	3.24509e-13	4.53333e-14
		10.29	4.98203e-13	4.70006e-14	3.03635e-13	4.53939e-14
		10.3	4.89093e-13	4.75794e-14	2.95079e-13	4.31212e-14
		10.31	4.85871e-13	4.58308e-14	2.91632e-13	4.08783e-14
		10.32
		10.33
		10.34
		10.35
		10.36
		10.37
		10.38	7.37589e-13	6.89764e-14	4.09762e-13	4.74107e-14
		10.39	7.26488e-13	6.54716e-14	3.93988e-13	4.67354e-14
		10.4	7.26517e-13	6.5354e-14	3.84053e-13	4.83133e-14
		10.41	7.32701e-13	6.44625e-14	3.8233e-13	4.71509e-14
		10.42
		10.43
		10.44
		10.45
		10.46
		10.47
		10.48	9.68459e-13	9.06039e-14	5.20564e-13	5.66181e-14
		10.49	9.56868e-13	8.7007e-14	5.10295e-13	5.80414e-14
		10.5	9.65309e-13	8.85523e-14	5.034e-13	5.89428e-14
		10.51	9.69219e-13	8.93546e-14	5.001e-13	6.04821e-14
		10.52
		10.53
		10.54
		10.55
		10.56
		10.57
		10.58	1.16428e-12	1.05645e-13	6.14712e-13	6.52126e-14
		10.59	1.14939e-12	1.04809e-13	6.06115e-13	6.41547e-14
		10.6	1.14191e-12	1.03073e-13	6.05385e-13	6.45531e-14
		10.61	1.1437e-12	1.03383e-13	6.03418e-13	6.37679e-14
		10.62
		10.63
		10.64
		10.65
		10.66
		10.67
		10.68	1.31736e-12	1.18716e-13	6.9317e-13	7.15634e-14
		10.69	1.30235e-12	1.18609e-13	6.87122e-13	6.88372e-14
		10.7	1.30828e-12	1.17643e-13	6.8302e-13	6.99803e-14
		10.71	1.30509e-12	1.16562e-13	6.87007e-13	7.04352e-14
		10.72
		10.73
		10.74
		10.75
		10.76
		10.77
		10.78	1.464e-12	1.30798e-13	7.81042e-13	7.32377e-14
		10.79	1.43886e-12	1.29637e-13	7.66727e-13	7.31212e-14
		10.8	1.43931e-12	1.28873e-13	7.61699e-13	7.57548e-14
		10.81	1.43837e-12	1.28714e-13	7.60206e-13	7.5924e-14
		10.82
		10.83
		10.84
		10.85
		10.86
		10.87
		10.88	1.59005e-12	1.44906e-13	8.45937e-13	7.56518e-14
		10.89	1.56007e-12	1.39299e-13	8.37491e-13	7.31128e-14
		10.9	1.56101e-12	1.40789e-13	8.27496e-13	7.80543e-14
		10.91	1.55767e-12	1.42298e-13	8.2015e-13	7.96571e-14
		10.92
		10.93
		10.94
		10.95
		10.96
		10.97
		10.98	1.68794e-12	1.5398e-13	9.03237e-13	7.84233e-14
		10.99	1.66351e-12	1.50056e-13	8.88758e-13	7.74171e-14
		11	1.66062e-12	1.48621e-13	8.90821e-13	7.87527e-14
		11.01	1.65247e-12	1.46082e-13	8.87886e-13	8.0972e-14
		11.02
		11.03
		11.04
		11.05
		11.06
		11.07
		11.08	1.76325e-12	1.5963e-13	9.64047e-13	8.21883e-14
		11.09	1.745e-12	1.56917e-13	9.48496e-13	8.1051e-14
		11.1	1.74187e-12	1.56171e-13	9.52259e-13	8.11224e-14
		11.11	1.73612e-12	1.54934e-13	9.50644e-13	8.24189e-14
		11.12
		11.13
		11.14
		11.15
		11.16
		11.17
		11.18	1.83537e-12	1.65186e-13	1.01621e-12	8.44432e-14
		11.19	1.80748e-12	1.61402e-13	1.00149e-12	8.54668e-14
		11.2	1.80346e-12	1.60461e-13	1.00399e-12	8.71156e-14
		11.21	1.79989e-12	1.61108e-13	9.98903e-13	8.76143e-14
		11.22	1.79749e-12	1.61224e-13	9.98754e-13	8.88792e-14
		11.23	1.79487e-12	1.60307e-13	9.95389e-13	8.86161e-14
		11.24	1.79847e-12	1.61409e-13	1.00162e-12	8.77974e-14
		11.25	1.79371e-12	1.60897e-13	1.00694e-12	8.71088e-14
		11.26	1.79328e-12	1.59491e-13	1.01336e-12	8.53272e-14
		11.27	1.79354e-12	1.59757e-13	1.0136e-12	8.75324e-14
		11.28	1.78708e-12	1.59528e-13	1.01752e-12	8.70379e-14
		11.29	1.78827e-12	1.602e-13	1.02035e-12	8.76826e-14
		11.3	1.7887e-12	1.60161e-13	1.01717e-12	9.09982e-14
		11.31	1.7819e-12	1.56263e-13	1.01927e-12	9.2081e-14
		11.32	1.78349e-12	1.58764e-13	1.01789e-12	9.29639e-14
		11.33	1.78125e-12	1.58193e-13	1.02159e-12	9.36995e-14
		11.34	1.78094e-12	1.57759e-13	1.02261e-12	9.57524e-14
		11.35	1.77942e-12	1.5763e-13	1.02525e-12	9.74043e-14
		11.36	1.77879e-12	1.57643e-13	1.01808e-12	9.83156e-14
		11.37	1.77015e-12	1.56414e-13	1.02698e-12	9.64753e-14
		11.38	1.7624e-12	1.56575e-13	1.02466e-12	9.88598e-14
		11.39	1.76018e-12	1.54448e-13	1.02362e-12	9.79588e-14
		11.4	1.76018e-12	1.56179e-13	1.02874e-12	9.5858e-14
		11.41	1.7586e-12	1.57666e-13	1.02098e-12	1.01266e-13
		11.42	1.75476e-12	1.54956e-13	1.02302e-12	1.01677e-13
		11.43	1.74818e-12	1.54726e-13	1.02838e-12	9.87205e-14
		11.44	1.74282e-12	1.54053e-13	1.02798e-12	1.00988e-13
		11.45	1.73822e-12	1.54079e-13	1.02558e-12	1.01387e-13
		11.46	1.73134e-12	1.54568e-13	1.02618e-12	1.02719e-13
		11.47	1.73254e-12	1.53893e-13	1.02002e-12	1.01282e-13
		11.48	1.72765e-12	1.54667e-13	1.02961e-12	1.01329e-13
		11.49	1.72337e-12	1.52056e-13	1.02629e-12	1.03013e-13
		11.5	1.7288e-12	1.53752e-13	1.02664e-12	1.00456e-13
		11.51	1.71505e-12	1.51761e-13	1.03356e-12	1.00169e-13
		11.52	1.71557e-12	1.52811e-13	1.02951e-12	1.02545e-13
		11.53	1.7035e-12	1.53502e-13	1.02863e-12	1.02428e-13
		11.54	1.70243e-12	1.4991e-13	1.03341e-12	9.98569e-14
		11.55	1.70058e-12	1.49971e-13	1.02704e-12	1.01383e-13
		11.56	1.69582e-12	1.50657e-13	1.03091e-12	1.01379e-13
		11.57	1.68805e-12	1.48848e-13	1.03244e-12	1.01768e-13
		11.58	1.68553e-12	1.50272e-13	1.03331e-12	1.00353e-13
		11.59	1.67763e-12	1.48613e-13	1.02635e-12	1.03754e-13
		11.6	1.66961e-12	1.46635e-13	1.02615e-12	1.05204e-13
		11.61	1.66633e-12	1.46835e-13	1.02696e-12	1.03438e-13
		11.62	1.66475e-12	1.49394e-13	1.0298e-12	1.02049e-13
		11.63	1.65525e-12	1.48987e-13	1.02953e-12	1.00959e-13
		11.64	1.65815e-12	1.48376e-13	1.02308e-12	1.01692e-13
		11.65	1.65691e-12	1.48142e-13	1.02252e-12	9.87903e-14
		11.66	1.6453e-12	1.46667e-13	1.0239e-12	1.03288e-13
		11.67	1.64369e-12	1.45893e-13	1.01783e-12	1.04017e-13
		11.68	1.63763e-12	1.45352e-13	1.02063e-12	1.0448e-13
		11.69	1.6402e-12	1.46007e-13	1.01338e-12	1.03629e-13
		11.7	1.6391e-12	1.46038e-13	1.01364e-12	1.06757e-13
		11.71	1.62837e-12	1.46121e-13	1.01307e-12	1.05043e-13
		11.72	1.62185e-12	1.4473e-13	1.01907e-12	1.04565e-13
		11.73	1.62609e-12	1.44277e-13	1.0138e-12	1.04537e-13
		11.74	1.62122e-12	1.44556e-13	1.01287e-12	1.01059e-13
		11.75	1.61501e-12	1.43281e-13	1.02e-12	1.04066e-13
		11.76	1.60886e-12	1.44379e-13	1.01759e-12	1.01873e-13
		11.77	1.59811e-12	1.45595e-13	1.01422e-12	1.00687e-13
		11.78	1.59257e-12	1.44207e-13	1.0137e-12	1.01022e-13
		11.79	1.58735e-12	1.43232e-13	1.00841e-12	1.02753e-13
		11.8	1.58871e-12	1.4277e-13	1.01678e-12	1.03194e-13
		11.81	1.58296e-12	1.43726e-13	1.01371e-12	1.01879e-13
		11.82	1.5777e-12	1.43185e-13	1.00864e-12	1.0192e-13
		11.83	1.57675e-12	1.43314e-13	1.00335e-12	1.0122e-13
		11.84	1.5672e-12	1.41388e-13	1.00415e-12	1.02553e-13
		11.85	1.56573e-12	1.41547e-13	1.00323e-12	1.00056e-13
		11.86	1.56762e-12	1.40783e-13	1.00412e-12	1.01398e-13
		11.87	1.56761e-12	1.41449e-13	1.00422e-12	1.01679e-13
		11.88	1.55427e-12	1.41795e-13	1.00613e-12	1.00994e-13
		11.89	1.54647e-12	1.40387e-13	9.97765e-13	1.02869e-13
		11.9	1.54972e-12	1.41593e-13	9.91541e-13	1.00706e-13
		11.91	1.54337e-12	1.41206e-13	9.99725e-13	9.75045e-14
		11.92	1.53806e-12	1.41345e-13	9.93277e-13	1.00771e-13
		11.93	1.53684e-12	1.40971e-13	9.86492e-13	1.01632e-13
		11.94	1.53739e-12	1.41748e-13	9.87538e-13	9.94993e-14
		11.95	1.53213e-12	1.41131e-13	9.83614e-13	1.00543e-13
		11.96	1.53007e-12	1.39603e-13	9.86587e-13	1.00469e-13
		11.97	1.52214e-12	1.39545e-13	9.85372e-13	9.85115e-14
		11.98	1.51839e-12	1.3951e-13	9.81774e-13	1.01852e-13
		11.99	1.51029e-12	1.39895e-13	9.74361e-13	1.03339e-13
		12	1.51439e-12	1.40778e-13	9.75603e-13	1.00798e-13
		12.01	1.49953e-12	1.38043e-13	9.73677e-13	1.02291e-13
		12.02	1.50189e-12	1.37616e-13	9.70848e-13	1.03026e-13
		12.03	1.50066e-12	1.37424e-13	9.79499e-13	9.97297e-14
		12.04	1.49877e-12	1.37663e-13	9.66647e-13	1.02151e-13
		12.05	1.48958e-12	1.37477e-13	9.66462e-13	1.01146e-13
		12.06	1.48929e-12	1.38872e-13	9.66181e-13	1.03125e-13
		12.07	1.47879e-12	1.40128e-13	9.67727e-13	9.82197e-14
		12.08	1.48255e-12	1.39729e-13	9.64937e-13	9.7496e-14
		12.09	1.48073e-12	1.38216e-13	9.66682e-13	9.54094e-14
		12.1	1.4808e-12	1.37847e-13	9.62663e-13	9.69149e-14
		12.11	1.46544e-12	1.36809e-13	9.6327e-13	9.91932e-14
		12.12	1.46714e-12	1.36937e-13	9.57816e-13	9.86182e-14
		12.13	1.46085e-12	1.3665e-13	9.51962e-13	9.75968e-14
		12.14	1.45047e-12	1.35524e-13	9.52462e-13	1.00874e-13
		12.15	1.45199e-12	1.36097e-13	9.53782e-13	1.00195e-13
		12.16	1.44874e-12	1.35575e-13	9.5208e-13	9.66654e-14
		12.17	1.44307e-12	1.3592e-13	9.52622e-13	1.00932e-13
		12.18	1.44449e-12	1.35671e-13	9.58086e-13	9.51021e-14
		12.19	1.44439e-12	1.35614e-13	9.48425e-13	9.40557e-14
		12.2	1.43997e-12	1.34779e-13	9.43743e-13	9.55051e-14
		12.21	1.43582e-12	1.34873e-13	9.46736e-13	9.67505e-14
		12.22	1.43582e-12	1.35442e-13	9.42826e-13	9.68333e-14
		12.23	1.4269e-12	1.36322e-13	9.43349e-13	9.4994e-14
		12.24	1.42764e-12	1.3549e-13	9.48353e-13	9.26536e-14
		12.25	1.42126e-12	1.33183e-13	9.39318e-13	9.62961e-14
		12.26	1.41601e-12	1.33827e-13	9.3969e-13	9.58305e-14
		12.27	1.4141e-12	1.33717e-13	9.3448e-13	9.42186e-14
		12.28	1.41173e-12	1.33739e-13	9.32137e-13	9.52294e-14
		12.29	1.41361e-12	1.34472e-13	9.35242e-13	9.38837e-14
		12.3	1.40853e-12	1.33724e-13	9.2633e-13	9.47419e-14
		12.31	1.40246e-12	1.33314e-13	9.25928e-13	9.54631e-14
		12.32	1.39922e-12	1.32183e-13	9.28879e-13	9.49145e-14
		12.33	1.39426e-12	1.32009e-13	9.2023e-13	9.45719e-14
		12.34	1.39678e-12	1.32616e-13	9.1882e-13	9.29971e-14
		12.35	1.39365e-12	1.34372e-13	9.14038e-13	9.71109e-14
		12.36	1.38954e-12	1.34366e-13	9.14222e-13	9.61132e-14
		12.37	1.39135e-12	1.32073e-13	9.16175e-13	9.57528e-14
		12.38	1.38657e-12	1.32745e-13	9.13128e-13	9.77949e-14
		12.39	1.37901e-12	1.32172e-13	9.09282e-13	9.77016e-14
		12.4	1.37814e-12	1.31025e-13	9.10846e-13	9.51233e-14
		12.41	1.37872e-12	1.30848e-13	9.07941e-13	9.74246e-14
		12.42	1.37142e-12	1.30393e-13	9.05409e-13	9.50611e-14
		12.43	1.37299e-12	1.3031e-13	9.03481e-13	9.74472e-14
		12.44	1.36415e-12	1.30883e-13	8.98918e-13	9.67844e-14
		12.45	1.3669e-12	1.31465e-13	8.98265e-13	9.64396e-14
		12.46	1.36034e-12	1.30248e-13	8.93671e-13	9.79853e-14
		12.47	1.36185e-12	1.31576e-13	8.9025e-13	9.64783e-14
		12.48	1.36336e-12	1.28993e-13	8.9436e-13	9.46314e-14
		12.49	1.35095e-12	1.28563e-13	8.8944e-13	9.471e-14
		12.5	1.35038e-12	1.2974e-13	8.901e-13	9.6256e-14
		12.51	1.35063e-12	1.30532e-13	8.91781e-13	9.67858e-14
		12.52	1.34508e-12	1.27921e-13	8.87382e-13	9.39298e-14
		12.53	1.34266e-12	1.30001e-13	8.85973e-13	9.45062e-14
		12.54	1.34028e-12	1.29927e-13	8.85885e-13	9.55788e-14
		12.55	1.34036e-12	1.28376e-13	8.85668e-13	9.3368e-14
		12.56	1.33147e-12	1.29873e-13	8.83899e-13	9.45258e-14
		12.57	1.33548e-12	1.29186e-13	8.85883e-13	9.35207e-14
		12.58	1.33396e-12	1.29227e-13	8.83831e-13	9.44009e-14
		12.59	1.32822e-12	1.28828e-13	8.8175e-13	9.32808e-14
		12.6	1.33063e-12	1.31164e-13	8.77242e-13	9.4535e-14
		12.61	1.32442e-12	1.27845e-13	8.77135e-13	9.32016e-14
		12.62	1.31484e-12	1.29699e-13	8.71371e-13	9.7446e-14
		12.63	1.31759e-12	1.30715e-13	8.72589e-13	9.61945e-14
		12.64	1.31376e-12	1.27804e-13	8.66379e-13	9.43645e-14
		12.65	1.31344e-12	1.28883e-13	8.67554e-13	9.38501e-14
		12.66	1.30997e-12	1.29306e-13	8.70029e-13	9.19948e-14
		12.67	1.30732e-12	1.27955e-13	8.67581e-13	9.183e-14
		12.68	1.30228e-12	1.27975e-13	8.56845e-13	9.25146e-14
		12.69	1.30614e-12	1.29089e-13	8.59147e-13	9.16375e-14
		12.7	1.30045e-12	1.27281e-13	8.57297e-13	9.30419e-14
		12.71	1.29983e-12	1.29137e-13	8.60355e-13	9.16583e-14
		12.72	1.29981e-12	1.29059e-13	8.56463e-13	9.09951e-14
		12.73	1.29584e-12	1.28393e-13	8.53228e-13	9.38726e-14
		12.74	1.29061e-12	1.27255e-13	8.63245e-13	9.23112e-14
		12.75	1.29283e-12	1.25929e-13	8.58246e-13	9.29488e-14
		12.76	1.28284e-12	1.26258e-13	8.56181e-13	9.01949e-14
		12.77	1.28419e-12	1.27987e-13	8.55042e-13	8.95173e-14
		12.78	1.28863e-12	1.27585e-13	8.53605e-13	9.06675e-14
		12.79	1.282e-12	1.26554e-13	8.50033e-13	9.33923e-14
		12.8	1.27912e-12	1.27733e-13	8.48852e-13	9.2381e-14
		12.81	1.27438e-12	1.26862e-13	8.43634e-13	9.45359e-14
		12.82	1.27813e-12	1.27555e-13	8.52321e-13	9.16607e-14
		12.83	1.2773e-12	1.27725e-13	8.40496e-13	9.30017e-14
		12.84	1.27019e-12	1.26341e-13	8.38164e-13	9.36584e-14
		12.85	1.26752e-12	1.25894e-13	8.37285e-13	9.51717e-14
		12.86	1.26748e-12	1.25787e-13	8.4157e-13	9.21887e-14
		12.87	1.26511e-12	1.27909e-13	8.34681e-13	9.26245e-14
		12.88	1.2632e-12	1.27722e-13	8.38595e-13	9.22691e-14
		12.89	1.26207e-12	1.27277e-13	8.3532e-13	9.29861e-14
		12.9	1.26624e-12	1.26701e-13	8.3127e-13	9.04943e-14
		12.91	1.26709e-12	1.27786e-13	8.25052e-13	9.09268e-14
		12.92	1.26019e-12	1.2723e-13	8.35256e-13	9.14707e-14
		12.93	1.25608e-12	1.26421e-13	8.34344e-13	9.08618e-14
		12.94	1.24865e-12	1.26983e-13	8.33709e-13	9.0972e-14
		12.95	1.25541e-12	1.28033e-13	8.33558e-13	9.00044e-14
		12.96	1.24705e-12	1.25814e-13	8.33782e-13	9.05883e-14
		12.97	1.25183e-12	1.25961e-13	8.30771e-13	9.08269e-14
		12.98	1.23994e-12	1.24093e-13	8.27863e-13	9.15676e-14
		12.99	1.25131e-12	1.26195e-13	8.24058e-13	9.34415e-14
		13	1.24263e-12	1.26165e-13	8.19288e-13	9.19019e-14
		13.01	1.24556e-12	1.26968e-13	8.24682e-13	9.21875e-14
		13.02	1.24189e-12	1.27598e-13	8.24589e-13	9.09465e-14
		13.03	1.23448e-12	1.28129e-13	8.22082e-13	9.27688e-14
		13.04	1.2389e-12	1.26689e-13	8.24655e-13	9.14998e-14
		13.05	1.23886e-12	1.28214e-13	8.11427e-13	9.18648e-14
		13.06	1.22348e-12	1.26795e-13	8.18992e-13	9.0217e-14
		13.07	1.22562e-12	1.26408e-13	8.13594e-13	9.12718e-14
		13.08	1.22697e-12	1.25849e-13	8.15644e-13	9.33799e-14
		13.09	1.22664e-12	1.26517e-13	8.119e-13	9.15226e-14
		13.1	1.22112e-12	1.26157e-13	8.10025e-13	9.04516e-14
		13.11	1.21964e-12	1.26067e-13	8.11312e-13	8.87899e-14
		13.12	1.21499e-12	1.27478e-13	8.11613e-13	8.96252e-14
		13.13	1.21686e-12	1.24199e-13	8.16611e-13	8.88585e-14
		13.14	1.22001e-12	1.27089e-13	8.13017e-13	8.97377e-14
		13.15	1.2157e-12	1.28935e-13	8.11801e-13	8.96087e-14
		13.16	1.20369e-12	1.27648e-13	8.07141e-13	8.91648e-14
		13.17	1.21433e-12	1.26681e-13	8.06909e-13	8.9768e-14
		13.18	1.20651e-12	1.29193e-13	8.1322e-13	8.91964e-14
		13.19	1.20841e-12	1.27274e-13	8.09887e-13	8.81654e-14
		13.2	1.20801e-12	1.26476e-13	7.99231e-13	9.09916e-14
		13.21	1.2036e-12	1.25834e-13	8.01021e-13	8.95506e-14
		13.22	1.20399e-12	1.26085e-13	8.06167e-13	8.74695e-14
		13.23	1.20358e-12	1.25608e-13	8.02274e-13	8.89436e-14
		13.24	1.19866e-12	1.27267e-13	8.02639e-13	9.26338e-14
		13.25	1.20091e-12	1.25527e-13	8.07258e-13	9.29141e-14
		13.26	1.19596e-12	1.25545e-13	8.03937e-13	9.52515e-14
		13.27	1.19108e-12	1.25193e-13	8.0731e-13	9.4023e-14
		13.28	1.19686e-12	1.24404e-13	8.07944e-13	9.28983e-14
		13.29	1.18701e-12	1.24668e-13	7.97609e-13	9.45303e-14
		13.3	1.18564e-12	1.2551e-13	8.06698e-13	9.30547e-14
		13.31	1.18939e-12	1.26331e-13	8.04731e-13	9.35455e-14
		13.32	1.18975e-12	1.23951e-13	8.01662e-13	9.46065e-14
		13.33	1.18209e-12	1.26273e-13	8.02687e-13	9.35556e-14
		13.34	1.17565e-12	1.25771e-13	8.04888e-13	9.2794e-14
		13.35	1.17598e-12	1.23206e-13	8.01072e-13	9.27761e-14
		13.36	1.18175e-12	1.24942e-13	8.00909e-13	9.47145e-14
		13.37	1.17817e-12	1.23925e-13	7.99056e-13	9.50094e-14
		13.38	1.17418e-12	1.24954e-13	7.97461e-13	9.41145e-14
		13.39	1.17516e-12	1.25274e-13	7.95603e-13	9.5078e-14
		13.4	1.17029e-12	1.26047e-13	7.93019e-13	9.08666e-14
		13.41	1.17419e-12	1.2366e-13	7.96637e-13	9.32622e-14
		13.42	1.17809e-12	1.2489e-13	7.94264e-13	9.30968e-14
		13.43	1.17204e-12	1.25386e-13	7.9203e-13	9.32112e-14
		13.44	1.16991e-12	1.24756e-13	7.94052e-13	9.30265e-14
		13.45	1.17001e-12	1.25183e-13	7.9871e-13	9.16032e-14
		13.46	1.16856e-12	1.24288e-13	7.97909e-13	9.10802e-14
		13.47	1.15842e-12	1.23594e-13	7.87958e-13	9.2373e-14
		13.48	1.16245e-12	1.23624e-13	7.92651e-13	9.2545e-14
		13.49	1.15836e-12	1.24569e-13	7.92629e-13	9.25829e-14
		13.5	1.15645e-12	1.24987e-13	7.89004e-13	9.01222e-14
		13.51	1.15562e-12	1.24047e-13	7.86676e-13	9.18321e-14
		13.52	1.15843e-12	1.24018e-13	7.87996e-13	9.03397e-14
		13.53	1.16362e-12	1.25242e-13	7.85456e-13	9.16608e-14
		13.54	1.1586e-12	1.2597e-13	7.86036e-13	8.97129e-14
		13.55	1.16101e-12	1.24533e-13	7.8435e-13	9.10016e-14
		13.56	1.16197e-12	1.23802e-13	7.865e-13	9.0792e-14
		13.57	1.15434e-12	1.24e-13	7.86526e-13	9.0812e-14
		13.58	1.15682e-12	1.22671e-13	7.83925e-13	9.05363e-14
		13.59	1.14499e-12	1.22312e-13	7.76384e-13	9.22748e-14
		13.6	1.13759e-12	1.2071e-13	7.82496e-13	9.14577e-14
		13.61	1.14896e-12	1.21374e-13	7.83359e-13	9.12483e-14
		13.62	1.14017e-12	1.19196e-13	7.81939e-13	8.84016e-14
		13.63	1.14253e-12	1.19004e-13	7.71587e-13	9.25767e-14
		13.64	1.13921e-12	1.2029e-13	7.79085e-13	9.27224e-14
		13.65	1.13936e-12	1.20461e-13	7.74583e-13	9.02429e-14
		13.66	1.13496e-12	1.19976e-13	7.71642e-13	8.98245e-14
		13.67	1.13927e-12	1.19962e-13	7.73978e-13	9.17845e-14
		13.68	1.13826e-12	1.17933e-13	7.75979e-13	8.89231e-14
		13.69	1.13555e-12	1.17592e-13	7.76813e-13	8.85931e-14
		13.7	1.13882e-12	1.17882e-13	7.74378e-13	9.13927e-14
		13.71	1.13054e-12	1.19639e-13	7.69938e-13	9.01977e-14
		13.72	1.12451e-12	1.20991e-13	7.69553e-13	9.11315e-14
		13.73	1.12403e-12	1.17327e-13	7.73146e-13	8.88407e-14
		13.74	1.12456e-12	1.17338e-13	7.73959e-13	9.17097e-14
		13.75	1.11964e-12	1.17024e-13	7.71823e-13	9.30382e-14
		13.76	1.12044e-12	1.15342e-13	7.70204e-13	8.96703e-14
		13.77	1.11873e-12	1.17074e-13	7.68754e-13	9.29655e-14
		13.78	1.12596e-12	1.17957e-13	7.70258e-13	9.31285e-14
		13.79	1.11788e-12	1.1915e-13	7.64313e-13	9.03136e-14
		13.8	1.11282e-12	1.1895e-13	7.69427e-13	9.12114e-14
		13.81	1.11507e-12	1.18995e-13	7.71823e-13	9.02058e-14
		13.82	1.11383e-12	1.20135e-13	7.58583e-13	9.167e-14
		13.83	1.11114e-12	1.18633e-13	7.59638e-13	9.04948e-14
		13.84	1.11497e-12	1.19914e-13	7.60185e-13	9.05759e-14
		13.85	1.1118e-12	1.19392e-13	7.65005e-13	9.1655e-14
		13.86	1.11091e-12	1.17102e-13	7.64037e-13	9.19746e-14
		13.87	1.10467e-12	1.15002e-13	7.64799e-13	8.75359e-14
		13.88	1.10194e-12	1.15324e-13	7.59695e-13	9.07707e-14
		13.89	1.10036e-12	1.14427e-13	7.56454e-13	9.18599e-14
		13.9	1.09516e-12	1.14367e-13	7.64077e-13	8.85008e-14
		13.91	1.10115e-12	1.13652e-13	7.63337e-13	9.25001e-14
		13.92	1.10538e-12	1.14977e-13	7.55036e-13	9.08707e-14
		13.93	1.09526e-12	1.13438e-13	7.57864e-13	8.93388e-14
		13.94	1.09313e-12	1.12716e-13	7.5777e-13	9.1518e-14
		13.95	1.09393e-12	1.1434e-13	7.64016e-13	9.01445e-14
		13.96	1.09299e-12	1.14343e-13	7.57339e-13	9.01557e-14
		13.97	1.09005e-12	1.15406e-13	7.50098e-13	9.08943e-14
		13.98	1.09142e-12	1.14134e-13	7.57113e-13	9.05576e-14
		13.99	1.08663e-12	1.13661e-13	7.55566e-13	8.91269e-14
		14	1.0895e-12	1.1344e-13	7.57104e-13	8.86501e-14
		14.01	1.08154e-12	1.12765e-13	7.53119e-13	8.85431e-14
		14.02	1.08721e-12	1.13148e-13	7.55536e-13	8.80642e-14
		14.03	1.07707e-12	1.13743e-13	7.53324e-13	8.91461e-14
		14.04	1.08168e-12	1.13509e-13	7.50099e-13	9.05668e-14
		14.05	1.07852e-12	1.1173e-13	7.53339e-13	8.92296e-14
		14.06	1.07757e-12	1.12148e-13	7.54598e-13	8.70361e-14
		14.07	1.08163e-12	1.11112e-13	7.57708e-13	8.68402e-14
		14.08	1.07735e-12	1.11365e-13	7.50878e-13	9.02044e-14
		14.09	1.07695e-12	1.13716e-13	7.50396e-13	8.81382e-14
		14.1	1.06933e-12	1.11612e-13	7.47223e-13	8.97433e-14
		14.11	1.06831e-12	1.10159e-13	7.42013e-13	8.93875e-14
		14.12	1.07482e-12	1.11595e-13	7.46127e-13	8.88206e-14
		14.13	1.065e-12	1.10463e-13	7.43863e-13	8.7387e-14
		14.14	1.071e-12	1.12629e-13	7.39617e-13	8.81682e-14
		14.15	1.06572e-12	1.12461e-13	7.36054e-13	9.12742e-14
		14.16	1.06756e-12	1.0962e-13	7.45814e-13	8.81377e-14
		14.17	1.06686e-12	1.10861e-13	7.52722e-13	8.8427e-14
		14.18	1.06506e-12	1.10452e-13	7.41048e-13	9.18693e-14
		14.19	1.05764e-12	1.08918e-13	7.45537e-13	8.97803e-14
		14.2	1.0591e-12	1.11888e-13	7.44192e-13	9.06935e-14
		14.21	1.06091e-12	1.11087e-13	7.42045e-13	8.86112e-14
		14.22	1.0526e-12	1.10688e-13	7.44759e-13	8.90901e-14
		14.23	1.0529e-12	1.1086e-13	7.42855e-13	8.99302e-14
		14.24	1.05285e-12	1.09779e-13	7.3889e-13	8.94219e-14
		14.25	1.04898e-12	1.10211e-13	7.4383e-13	9.04634e-14
		14.26	1.0517e-12	1.07623e-13	7.38739e-13	8.9576e-14
		14.27	1.04766e-12	1.08054e-13	7.41456e-13	9.08527e-14
		14.28	1.04384e-12	1.083e-13	7.43099e-13	9.04048e-14
		14.29	1.0429e-12	1.09052e-13	7.36949e-13	9.18531e-14
		14.3	1.04013e-12	1.07221e-13	7.35449e-13	9.23614e-14
		14.31	1.04108e-12	1.09535e-13	7.31688e-13	9.17854e-14
		14.32	1.03928e-12	1.07284e-13	7.33324e-13	9.0328e-14
		14.33	1.04031e-12	1.06967e-13	7.34043e-13	9.09556e-14
		14.34	1.03986e-12	1.08676e-13	7.36179e-13	8.9514e-14
		14.35	1.0375e-12	1.0731e-13	7.43582e-13	9.02456e-14
		14.36	1.04194e-12	1.07234e-13	7.39944e-13	8.77873e-14
		14.37	1.03241e-12	1.04834e-13	7.28195e-13	9.02307e-14
		14.38	1.0335e-12	1.05226e-13	7.37306e-13	8.99259e-14
		14.39	1.03383e-12	1.07888e-13	7.34827e-13	8.96564e-14
		14.4	1.03022e-12	1.04858e-13	7.34528e-13	8.85777e-14
		14.41	1.02982e-12	1.06962e-13	7.20521e-13	8.8706e-14
		14.42	1.02452e-12	1.07694e-13	7.32958e-13	8.80301e-14
		14.43	1.02657e-12	1.06814e-13	7.27183e-13	9.31006e-14
		14.44	1.02523e-12	1.07029e-13	7.26862e-13	9.10827e-14
		14.45	1.02576e-12	1.06289e-13	7.27258e-13	9.06295e-14
		14.46	1.01947e-12	1.05052e-13	7.22444e-13	8.98005e-14
		14.47	1.01592e-12	1.04456e-13	7.32431e-13	8.75828e-14
		14.48	1.01681e-12	1.05932e-13	7.30111e-13	9.01533e-14
		14.49	1.01734e-12	1.04136e-13	7.34834e-13	9.05945e-14
		14.5	1.02105e-12	1.04558e-13	7.33897e-13	8.95594e-14
		14.51	1.01841e-12	1.0453e-13	7.33997e-13	8.91126e-14
		14.52	1.01462e-12	1.03694e-13	7.27641e-13	8.77906e-14
		14.53	1.01809e-12	1.06323e-13	7.29364e-13	8.92738e-14
		14.54	1.0107e-12	1.04142e-13	7.26578e-13	9.00658e-14
		14.55	1.01851e-12	1.04572e-13	7.27233e-13	8.86734e-14
		14.56	1.00864e-12	1.05867e-13	7.25006e-13	9.00502e-14
		14.57	1.00988e-12	1.03253e-13	7.29973e-13	8.85631e-14
		14.58	1.00731e-12	1.03768e-13	7.32596e-13	8.82996e-14
		14.59	1.00696e-12	1.03386e-13	7.3181e-13	8.85867e-14
		14.6	1.00752e-12	1.03789e-13	7.27795e-13	8.86472e-14
		14.61	1.00779e-12	1.04662e-13	7.22722e-13	8.92279e-14
		14.62	1.00503e-12	1.06248e-13	7.2181e-13	8.94682e-14
		14.63	9.98682e-13	1.04454e-13	7.30615e-13	9.17578e-14
		14.64	1.00045e-12	1.05312e-13	7.25183e-13	8.9185e-14
		14.65	1.00368e-12	1.05828e-13	7.30385e-13	8.88114e-14
		14.66	9.97513e-13	1.04915e-13	7.3077e-13	8.79734e-14
		14.67	9.958e-13	1.05489e-13	7.28075e-13	8.97797e-14
		14.68	9.98486e-13	1.04879e-13	7.31424e-13	8.79329e-14
		14.69	9.99619e-13	1.04724e-13	7.25286e-13	8.9543e-14
		14.7	9.9413e-13	1.04539e-13	7.3205e-13	8.68531e-14
		14.71	9.94717e-13	1.07027e-13	7.2275e-13	8.82461e-14
		14.72	9.96912e-13	1.05946e-13	7.19003e-13	8.75523e-14
		14.73	9.93673e-13	1.04064e-13	7.24145e-13	8.91311e-14
		14.74	9.92753e-13	1.02808e-13	7.2778e-13	8.9922e-14
		14.75	9.89789e-13	1.05218e-13	7.20988e-13	8.75507e-14
		14.76	9.96232e-13	1.04687e-13	7.21098e-13	9.00353e-14
		14.77	1.00087e-12	1.03911e-13	7.17524e-13	9.10923e-14
		14.78	9.96324e-13	1.0436e-13	7.15608e-13	9.15288e-14
		14.79	9.92045e-13	1.0401e-13	7.12388e-13	9.21164e-14
		14.8	9.94353e-13	1.04242e-13	7.13391e-13	9.15618e-14
		14.81	9.86344e-13	1.03848e-13	7.14147e-13	9.12741e-14
		14.82	9.85952e-13	1.0412e-13	7.21634e-13	9.14826e-14
		14.83	9.8811e-13	1.04857e-13	7.17198e-13	8.98684e-14
		14.84	9.83497e-13	1.03375e-13	7.24108e-13	8.99936e-14
		14.85	9.81419e-13	1.03981e-13	7.14518e-13	8.88233e-14
		14.86	9.84425e-13	1.04681e-13	7.10472e-13	8.85665e-14
		14.87	9.80501e-13	1.04581e-13	7.07494e-13	9.02116e-14
		14.88	9.82391e-13	1.04218e-13	7.1705e-13	8.86052e-14
		14.89	9.79833e-13	1.04801e-13	7.17729e-13	9.09528e-14
		14.9	9.74341e-13	1.03286e-13	7.13639e-13	8.93407e-14
		14.91	9.75906e-13	1.02392e-13	7.12218e-13	8.68715e-14
		14.92	9.73504e-13	1.04563e-13	7.0715e-13	9.10281e-14
		14.93	9.68221e-13	1.01701e-13	7.13426e-13	8.83486e-14
		14.94	9.70941e-13	1.03661e-13	7.10297e-13	8.92871e-14
		14.95	9.69437e-13	1.03e-13	7.05363e-13	9.1366e-14
		14.96	9.67281e-13	1.02917e-13	7.03542e-13	8.98902e-14
		14.97	9.67213e-13	1.04349e-13	7.07586e-13	8.90986e-14
		14.98	9.68659e-13	1.02685e-13	6.97555e-13	9.09824e-14
		14.99	9.65131e-13	1.03247e-13	7.02686e-13	9.08118e-14
		15	9.63146e-13	1.03338e-13	7.0222e-13	9.16935e-14
		15.01	9.61749e-13	1.02847e-13	7.0704e-13	9.04587e-14
		15.02	9.59821e-13	1.03306e-13	7.10102e-13	8.86989e-14
		15.03	9.58188e-13	1.02399e-13	6.94727e-13	9.18618e-14
		15.04	9.57324e-13	1.03456e-13	6.98282e-13	9.01093e-14
		15.05	9.55914e-13	1.00955e-13	6.94611e-13	8.9451e-14
		15.06	9.62983e-13	1.02409e-13	6.96179e-13	8.99223e-14
		15.07	9.5686e-13	1.01466e-13	7.04705e-13	8.91102e-14
		15.08	9.56123e-13	1.00677e-13	6.981e-13	8.91553e-14
		15.09	9.53364e-13	1.00249e-13	7.00732e-13	9.02427e-14
		15.1	9.56442e-13	1.02662e-13	6.89624e-13	8.76527e-14
		15.11	9.52648e-13	1.00755e-13	6.92647e-13	8.80776e-14
		15.12	9.51323e-13	1.02419e-13	6.97496e-13	8.9459e-14
		15.13	9.47124e-13	1.02008e-13	6.96891e-13	8.83706e-14
		15.14	9.50038e-13	1.00501e-13	6.96066e-13	8.86812e-14
		15.15	9.49204e-13	1.01491e-13	6.8812e-13	9.06482e-14
		15.16	9.50741e-13	9.9238e-14	6.9075e-13	9.09621e-14
		15.17	9.44953e-13	1.00583e-13	6.90389e-13	8.8943e-14
		15.18	9.39726e-13	9.9194e-14	6.90245e-13	9.23737e-14
		15.19	9.399e-13	9.80779e-14	6.87651e-13	8.87982e-14
		15.2	9.40185e-13	9.78076e-14	6.83205e-13	8.89026e-14
		15.21	9.39826e-13	9.7829e-14	6.85542e-13	8.90864e-14
		15.22	9.44604e-13	9.69499e-14	6.86644e-13	8.80863e-14
		15.23	9.44176e-13	9.50138e-14	6.85776e-13	9.06598e-14
		15.24	9.39159e-13	9.60621e-14	6.87998e-13	8.95611e-14
		15.25	9.3744e-13	9.40072e-14	6.85201e-13	8.92176e-14
		15.26	9.34108e-13	9.5157e-14	6.87361e-13	9.01506e-14
		15.27	9.31578e-13	9.64151e-14	6.85722e-13	8.96549e-14
		15.28	9.24672e-13	9.77737e-14	6.92803e-13	8.73706e-14
		15.29	9.31485e-13	9.71446e-14	6.88087e-13	8.95794e-14
		15.3	9.29184e-13	9.61418e-14	6.83117e-13	9.0514e-14
		15.31	9.27873e-13	9.62858e-14	6.7996e-13	9.01866e-14
		15.32	9.26331e-13	9.6348e-14	6.84452e-13	9.01288e-14
		15.33	9.19901e-13	9.70729e-14	6.87862e-13	8.91791e-14
		15.34	9.24765e-13	9.43797e-14	6.8877e-13	8.97728e-14
		15.35	9.269e-13	9.4696e-14	6.85446e-13	8.98349e-14
		15.36	9.20605e-13	9.30722e-14	6.85195e-13	8.79651e-14
		15.37	9.20213e-13	9.4896e-14	6.80954e-13	8.87163e-14
		15.38	9.2094e-13	9.61493e-14	6.86619e-13	8.82139e-14
		15.39	9.21085e-13	9.55641e-14	6.77598e-13	8.88193e-14
		15.4	9.20569e-13	9.38879e-14	6.77901e-13	8.86442e-14
		15.41	9.17061e-13	9.57648e-14	6.85174e-13	8.77048e-14
		15.42	9.18639e-13	9.55942e-14	6.84018e-13	8.86932e-14
		15.43	9.15758e-13	9.54838e-14	6.87012e-13	8.79434e-14
		15.44	9.13015e-13	9.58471e-14	6.78908e-13	9.10937e-14
		15.45	9.11403e-13	9.72659e-14	6.7827e-13	9.00258e-14
		15.46	9.09452e-13	9.65632e-14	6.74517e-13	8.8631e-14
		15.47	9.05378e-13	9.48511e-14	6.77307e-13	8.89271e-14
		15.48	9.06767e-13	9.46952e-14	6.78037e-13	9.10589e-14
		15.49	9.03526e-13	9.56014e-14	6.76061e-13	9.23418e-14
		15.5	9.07996e-13	9.49761e-14	6.76582e-13	9.03378e-14
		15.51	9.1126e-13	9.49954e-14	6.73799e-13	9.11758e-14
		15.52	9.08405e-13	9.54687e-14	6.73037e-13	9.02722e-14
		15.53	9.01974e-13	9.46749e-14	6.80027e-13	8.92537e-14
		15.54	9.04438e-13	9.27101e-14	6.77819e-13	9.03283e-14
		15.55	9.07396e-13	9.26326e-14	6.78019e-13	8.99041e-14
		15.56	9.07546e-13	9.19745e-14	6.77896e-13	8.98107e-14
		15.57	9.03491e-13	9.38134e-14	6.73914e-13	8.83949e-14
		15.58	9.04033e-13	9.25074e-14	6.73986e-13	8.89305e-14
		15.59	9.00522e-13	9.32095e-14	6.67088e-13	9.25933e-14
		15.6	8.98575e-13	9.43648e-14	6.67976e-13	9.11021e-14
		15.61	8.99121e-13	9.33572e-14	6.61852e-13	8.91354e-14
		15.62	8.99635e-13	9.58683e-14	6.69678e-13	8.90743e-14
		15.63	8.95301e-13	9.55873e-14	6.65841e-13	9.09245e-14
		15.64	8.94152e-13	9.26708e-14	6.6758e-13	8.98792e-14
		15.65	8.94177e-13	9.35702e-14	6.67982e-13	8.92677e-14
		15.66	8.9057e-13	9.29948e-14	6.72489e-13	9.0046e-14
		15.67	8.91392e-13	9.32306e-14	6.68735e-13	9.06107e-14
		15.68	8.95983e-13	9.25927e-14	6.6155e-13	9.01075e-14
		15.69	8.93926e-13	9.30434e-14	6.59799e-13	8.82915e-14
		15.7	8.89966e-13	9.25249e-14	6.61504e-13	9.00403e-14
		15.71	8.89947e-13	9.33805e-14	6.68091e-13	8.79093e-14
		15.72	8.88767e-13	9.38448e-14	6.6729e-13	8.84245e-14
		15.73	8.89181e-13	9.25686e-14	6.64127e-13	9.14249e-14
		15.74	8.86002e-13	9.37724e-14	6.68753e-13	9.07147e-14
		15.75	8.91419e-13	9.41087e-14	6.66376e-13	9.13515e-14
		15.76	8.84866e-13	9.41024e-14	6.62028e-13	9.02332e-14
		15.77	8.83811e-13	9.30033e-14	6.60895e-13	9.17725e-14
		15.78	8.81022e-13	9.34572e-14	6.66005e-13	8.90898e-14
		15.79	8.90492e-13	9.28853e-14	6.62005e-13	9.05443e-14
		15.8	8.90725e-13	9.3608e-14	6.63455e-13	8.87468e-14
		15.81	8.84617e-13	9.39471e-14	6.60399e-13	9.12631e-14
		15.82	8.77408e-13	9.40361e-14	6.54326e-13	9.18674e-14
		15.83	8.7842e-13	9.42386e-14	6.64794e-13	8.97009e-14
		15.84	8.78442e-13	9.26999e-14	6.612e-13	9.30112e-14
		15.85	8.749e-13	9.35138e-14	6.6043e-13	9.16788e-14
		15.86	8.71721e-13	9.32217e-14	6.61337e-13	9.06907e-14
		15.87	8.77032e-13	9.32361e-14	6.56663e-13	9.19762e-14
		15.88	8.75638e-13	9.30697e-14	6.57399e-13	9.2856e-14
		15.89	8.77588e-13	9.17154e-14	6.59156e-13	9.28593e-14
		15.9	8.70577e-13	9.50718e-14	6.59042e-13	9.10453e-14
		15.91	8.69345e-13	9.51148e-14	6.58363e-13	8.99949e-14
		15.92	8.58654e-13	9.34467e-14	6.55593e-13	8.9481e-14
		15.93	8.69223e-13	9.45832e-14	6.48683e-13	9.09427e-14
		15.94	8.66325e-13	9.27755e-14	6.51872e-13	8.97989e-14
		15.95	8.6724e-13	9.20424e-14	6.5352e-13	8.88298e-14
		15.96	8.64165e-13	9.41281e-14	6.52656e-13	8.90373e-14
		15.97	8.58203e-13	9.26366e-14	6.51776e-13	9.14752e-14
		15.98	8.53902e-13	9.32014e-14	6.55931e-13	9.08828e-14
		15.99	8.51736e-13	9.44292e-14	6.54363e-13	9.07847e-14
		16	8.61433e-13	9.33724e-14	6.4892e-13	9.00919e-14
		16.01	8.55454e-13	9.37595e-14	6.44518e-13	9.22669e-14
		16.02	8.50624e-13	9.37479e-14	6.51328e-13	9.23497e-14
		16.03	8.58012e-13	9.50853e-14	6.48711e-13	8.97612e-14
		16.04	8.55813e-13	9.47244e-14	6.50546e-13	8.95707e-14
		16.05	8.50387e-13	9.49871e-14	6.46242e-13	9.05653e-14
		16.06	8.49702e-13	9.30802e-14	6.50927e-13	8.83739e-14
		16.07	8.52213e-13	9.26945e-14	6.49434e-13	8.87608e-14
		16.08	8.56337e-13	9.48893e-14	6.48035e-13	8.99441e-14
		16.09	8.51371e-13	9.27572e-14	6.45869e-13	8.94498e-14
		16.1	8.48612e-13	9.4992e-14	6.51698e-13	8.79896e-14
		16.11	8.49571e-13	9.23987e-14	6.50136e-13	8.71874e-14
		16.12	8.52653e-13	9.27658e-14	6.48061e-13	8.927e-14
		16.13	8.50479e-13	9.18655e-14	6.44037e-13	8.82922e-14
		16.14	8.45476e-13	9.31753e-14	6.45333e-13	8.72813e-14
		16.15	8.51454e-13	9.25526e-14	6.45591e-13	8.92901e-14
		16.16	8.47084e-13	9.27372e-14	6.43914e-13	8.86213e-14
		16.17	8.46042e-13	9.26017e-14	6.45299e-13	8.95517e-14
		16.18	8.38381e-13	9.09224e-14	6.43559e-13	8.86212e-14
		16.19	8.40965e-13	9.13845e-14	6.46003e-13	9.04012e-14
		16.2	8.42409e-13	9.29256e-14	6.42771e-13	9.01572e-14
		16.21	8.38315e-13	9.22816e-14	6.44794e-13	8.9235e-14
		16.22	8.44414e-13	8.91101e-14	6.45005e-13	8.89797e-14
		16.23	8.43291e-13	8.96698e-14	6.41506e-13	8.89634e-14
		16.24	8.43325e-13	8.96935e-14	6.42464e-13	9.04012e-14
		16.25	8.4158e-13	8.9728e-14	6.42502e-13	9.06963e-14
		16.26	8.32257e-13	9.20945e-14	6.4781e-13	8.90068e-14
		16.27	8.37237e-13	9.12656e-14	6.45707e-13	8.87125e-14
		16.28	8.29888e-13	9.26345e-14	6.4543e-13	9.06565e-14
		16.29	8.36664e-13	8.98478e-14	6.44388e-13	8.89779e-14
		16.3	8.36192e-13	9.19498e-14	6.40355e-13	9.08874e-14
		16.31	8.31552e-13	9.21918e-14	6.46019e-13	8.9303e-14
		16.32	8.35251e-13	9.16867e-14	6.44387e-13	9.04809e-14
		16.33	8.32634e-13	9.07712e-14	6.42937e-13	8.94846e-14
		16.34	8.25769e-13	9.33762e-14	6.36675e-13	8.95022e-14
		16.35	8.28139e-13	9.26233e-14	6.44247e-13	8.66966e-14
		16.36	8.26628e-13	9.1162e-14	6.39196e-13	8.85255e-14
		16.37	8.29398e-13	9.23169e-14	6.39405e-13	8.85065e-14
		16.38	8.22175e-13	9.39646e-14	6.38492e-13	8.83178e-14
		16.39	8.25438e-13	9.2364e-14	6.39338e-13	8.72284e-14
		16.4	8.32798e-13	9.11069e-14	6.43039e-13	8.59365e-14
		16.41	8.2217e-13	9.18832e-14	6.42646e-13	8.81821e-14
		16.42	8.29061e-13	9.21189e-14	6.37695e-13	8.55751e-14
		16.43	8.3033e-13	9.2584e-14	6.45372e-13	8.43474e-14
		16.44	8.24676e-13	9.11589e-14	6.38726e-13	8.60753e-14
		16.45	8.29887e-13	9.22906e-14	6.41913e-13	8.57928e-14
		16.46	8.2677e-13	9.15791e-14	6.39892e-13	8.77136e-14
		16.47	8.24572e-13	9.3279e-14	6.33663e-13	8.64365e-14
		16.48	8.122e-13	9.25164e-14	6.34029e-13	8.58883e-14
		16.49	8.18713e-13	9.40371e-14	6.35478e-13	8.30174e-14
		16.5	8.21245e-13	9.23699e-14	6.35631e-13	8.29087e-14
		16.51	8.191e-13	9.24127e-14	6.59579e-13	7.77988e-14
		16.52	8.21879e-13	9.31418e-14	6.61892e-13	7.78096e-14
		16.53	8.16787e-13	9.2672e-14	6.517e-13	7.95125e-14
		16.54	8.16741e-13	9.19981e-14	6.60815e-13	7.6534e-14
		16.55	8.1655e-13	9.34134e-14	6.41246e-13	7.98411e-14
		16.56	8.17535e-13	9.13311e-14	6.45567e-13	8.1146e-14
		16.57	8.12629e-13	9.20609e-14	6.40174e-13	8.1131e-14
		16.58	8.12766e-13	9.1917e-14	6.49297e-13	8.2321e-14
		16.59	8.11407e-13	9.11673e-14	6.47559e-13	7.97691e-14
		16.6	8.12587e-13	9.04432e-14	6.50698e-13	7.90273e-14
		16.61	8.16832e-13	9.11889e-14	6.52194e-13	7.90112e-14
		16.62	8.09628e-13	9.06727e-14	6.49039e-13	7.93284e-14
		16.63	8.16301e-13	9.21322e-14	6.42569e-13	8.07669e-14
		16.64	8.14931e-13	9.14489e-14	6.27667e-13	8.51342e-14
		16.65	8.12047e-13	9.10028e-14	6.24055e-13	8.6456e-14
		16.66	8.10981e-13	9.26602e-14	6.21968e-13	8.53575e-14
		16.67	8.1217e-13	9.22463e-14	6.2257e-13	8.65257e-14
		16.68	8.09544e-13	9.10025e-14	6.24045e-13	8.53803e-14
		16.69	8.08367e-13	9.26812e-14	6.24745e-13	8.47317e-14
		16.7	8.1206e-13	9.26098e-14	6.21186e-13	8.52814e-14
		16.71	8.11367e-13	9.48986e-14	6.25436e-13	8.09942e-14
		16.72	8.10908e-13	9.24586e-14	6.17149e-13	8.57658e-14
		16.73	8.08715e-13	9.1314e-14	6.27738e-13	8.14067e-14
		16.74	8.06064e-13	9.39939e-14	6.21397e-13	8.16966e-14
		16.75	8.08806e-13	9.22914e-14	6.22504e-13	8.08656e-14
		16.76	8.03369e-13	9.12384e-14	6.20288e-13	8.09321e-14
		16.77	8.01041e-13	9.01276e-14	6.15943e-13	8.1894e-14
		16.78	8.01143e-13	8.92378e-14	6.12024e-13	8.22923e-14
		16.79	8.04847e-13	9.04649e-14	6.09414e-13	8.37566e-14
		16.8	8.04213e-13	8.83781e-14	6.06863e-13	8.39849e-14
		16.81	8.01167e-13	9.07134e-14	6.1553e-13	8.44915e-14
		16.82	8.05083e-13	8.87667e-14	6.09313e-13	8.43205e-14
		16.83	7.99636e-13	9.04927e-14	6.11986e-13	8.34716e-14
		16.84	7.97637e-13	8.91071e-14	6.12089e-13	8.12374e-14
		16.85	7.96274e-13	8.99219e-14	6.08187e-13	8.30489e-14
		16.86	7.91104e-13	9.19987e-14	6.11182e-13	8.33116e-14
		16.87	7.94446e-13	9.12179e-14	6.13329e-13	8.26493e-14
		16.88	7.9731e-13	8.90588e-14	6.09502e-13	8.60679e-14
		16.89	7.96169e-13	9.07077e-14	6.10901e-13	8.54419e-14
		16.9	7.9598e-13	8.94012e-14	6.049e-13	8.52041e-14
		16.91	7.93042e-13	9.03752e-14	6.07879e-13	8.23934e-14
		16.92	7.87577e-13	9.22118e-14	6.07404e-13	8.50219e-14
		16.93	7.91081e-13	8.92325e-14	6.08622e-13	8.37423e-14
		16.94	7.87988e-13	8.84982e-14	6.08056e-13	8.43453e-14
		16.95	7.84005e-13	9.08048e-14	6.0486e-13	8.26394e-14
		16.96	7.89203e-13	8.99117e-14	6.04927e-13	8.04577e-14
		16.97	7.91725e-13	8.90173e-14	6.02837e-13	8.16799e-14
		16.98	7.90174e-13	8.83725e-14	6.06361e-13	8.55112e-14
		16.99	7.8626e-13	8.85692e-14	6.07008e-13	8.33997e-14
		17	7.90463e-13	8.77796e-14	6.01723e-13	8.35031e-14
		17.01	7.84015e-13	8.79504e-14	6.0826e-13	8.29969e-14
		17.02	7.86983e-13	8.94127e-14	6.02948e-13	8.35773e-14
		17.03	7.90419e-13	8.77509e-14	6.09405e-13	8.26838e-14
		17.04	7.84818e-13	8.58724e-14	6.00348e-13	8.54571e-14
		17.05	7.82567e-13	8.72225e-14	6.04133e-13	8.49492e-14
		17.06	7.82546e-13	8.80178e-14	6.07355e-13	8.42292e-14
		17.07	7.84163e-13	8.84853e-14	6.03873e-13	8.29516e-14
		17.08	7.8458e-13	8.67718e-14	5.99229e-13	8.29875e-14
		17.09	7.78211e-13	8.82786e-14	5.9725e-13	8.15511e-14
		17.1	7.80359e-13	8.61858e-14	5.98777e-13	8.4471e-14
		17.11	7.8204e-13	8.62833e-14	6.01424e-13	8.39696e-14
		17.12	7.77489e-13	8.82091e-14	5.92771e-13	8.5872e-14
		17.13	7.77542e-13	8.64622e-14	6.03236e-13	8.34699e-14
		17.14	7.74695e-13	8.72171e-14	5.98828e-13	8.59384e-14
		17.15	7.72938e-13	8.52204e-14	5.9725e-13	8.21924e-14
		17.16	7.77708e-13	8.58813e-14	6.02264e-13	8.29704e-14
		17.17	7.75273e-13	8.56147e-14	6.01218e-13	8.31054e-14
		17.18	7.77088e-13	8.53109e-14	5.99076e-13	8.45187e-14
		17.19	7.72697e-13	8.50787e-14	5.96374e-13	8.62675e-14
		17.2	7.70566e-13	8.54696e-14	5.98756e-13	8.49555e-14
		17.21	7.69167e-13	8.47119e-14	5.95153e-13	8.43554e-14
		17.22	7.75262e-13	8.39873e-14	5.95094e-13	8.39737e-14
		17.23	7.68534e-13	8.40336e-14	5.93829e-13	8.43246e-14
		17.24	7.71108e-13	8.4254e-14	5.94353e-13	8.36953e-14
		17.25	7.66391e-13	8.43113e-14	6.00849e-13	8.90658e-14
		17.26	7.61422e-13	8.46026e-14	6.00903e-13	8.84339e-14
		17.27	7.6717e-13	8.54714e-14	6.03377e-13	8.81325e-14
		17.28	7.71643e-13	8.54027e-14	6.03626e-13	8.93051e-14
		17.29	7.68623e-13	8.6367e-14	6.08116e-13	8.98535e-14
		17.3	7.63156e-13	8.66787e-14	5.96858e-13	9.29301e-14
		17.31	7.66721e-13	8.57811e-14	6.02364e-13	9.01489e-14
		17.32	7.6311e-13	8.52204e-14	6.04719e-13	9.17404e-14
		17.33	7.638e-13	8.19898e-14	6.09417e-13	9.05058e-14
		17.34	7.63777e-13	8.40918e-14	6.03299e-13	9.06075e-14
		17.35	7.63522e-13	8.60459e-14	6.04397e-13	8.9073e-14
		17.36	7.62072e-13	8.75629e-14	5.99999e-13	9.22395e-14
		17.37	7.62125e-13	8.6169e-14	6.01409e-13	8.93693e-14
		17.38	7.55375e-13	8.61792e-14	6.09747e-13	9.02616e-14
		17.39	7.62106e-13	8.7101e-14	5.96384e-13	9.11849e-14
		17.4	7.58709e-13	8.60411e-14	6.01199e-13	9.17539e-14
		17.41	7.56614e-13	8.73069e-14	6.02515e-13	9.04151e-14
		17.42	7.57985e-13	8.83522e-14	6.06933e-13	9.03055e-14
		17.43	7.59191e-13	8.77142e-14	6.02943e-13	8.94025e-14
		17.44	7.59712e-13	8.54445e-14	6.05716e-13	8.93889e-14
		17.45	7.55137e-13	8.63644e-14	6.03164e-13	8.92025e-14
		17.46	7.58514e-13	8.69398e-14	6.06504e-13	8.8231e-14
		17.47	7.54285e-13	8.61174e-14	6.04399e-13	8.86601e-14
		17.48	7.57704e-13	8.68687e-14	5.94806e-13	8.94047e-14
		17.49	7.53509e-13	8.56862e-14	6.03222e-13	8.82346e-14
		17.5	7.53942e-13	8.75193e-14	6.04161e-13	8.8814e-14
		17.51	7.56076e-13	8.65906e-14	6.01583e-13	9.04596e-14
		17.52	7.51452e-13	8.81561e-14	6.05013e-13	9.07962e-14
		17.53	7.54265e-13	8.83376e-14	6.00137e-13	9.04129e-14
		17.54	7.57481e-13	8.60201e-14	6.06995e-13	8.94917e-14
		17.55	7.51509e-13	8.78505e-14	5.99186e-13	8.86577e-14
		17.56	7.53174e-13	8.73065e-14	5.95441e-13	8.89144e-14
		17.57	7.52603e-13	8.67769e-14	6.02384e-13	9.07553e-14
		17.58	7.52131e-13	8.49376e-14	5.99326e-13	9.02738e-14
		17.59	7.51711e-13	8.68516e-14	5.99434e-13	8.97522e-14
		17.6	7.50613e-13	8.83849e-14	5.99374e-13	8.81448e-14
		17.61	7.43189e-13	8.76829e-14	6.00977e-13	9.05342e-14
		17.62	7.43705e-13	8.65667e-14	6.03238e-13	9.17263e-14
		17.63	7.44568e-13	8.88378e-14	5.91913e-13	8.89675e-14
		17.64	7.45973e-13	8.90627e-14	5.98959e-13	8.73368e-14
		17.65	7.4599e-13	8.66788e-14	5.98266e-13	8.80071e-14
		17.66	7.40845e-13	8.71777e-14	5.9144e-13	8.92361e-14
		17.67	7.38564e-13	8.56789e-14	5.9483e-13	8.88368e-14
		17.68	7.42054e-13	8.66624e-14	5.93437e-13	8.82041e-14
		17.69	7.42537e-13	8.53648e-14	5.93186e-13	8.87026e-14
		17.7	7.4224e-13	8.56841e-14	5.9564e-13	8.79983e-14
		17.71	7.45799e-13	8.57587e-14	5.93762e-13	8.71431e-14
		17.72	7.40502e-13	8.65371e-14	5.90828e-13	8.76637e-14
		17.73	7.3975e-13	8.42483e-14	5.92898e-13	8.68601e-14
		17.74	7.36192e-13	8.45236e-14	5.95504e-13	8.63989e-14
		17.75	7.35753e-13	8.58162e-14	5.94568e-13	8.96929e-14
		17.76	7.36155e-13	8.54562e-14	5.94007e-13	8.6442e-14
		17.77	7.36332e-13	8.65448e-14	5.87956e-13	8.91152e-14
		17.78	7.37275e-13	8.4813e-14	5.90808e-13	9.03271e-14
		17.79	7.36707e-13	8.49206e-14	5.95776e-13	8.78182e-14
		17.8	7.38052e-13	8.71165e-14	5.90415e-13	8.91308e-14
		17.81	7.31756e-13	8.57479e-14	5.89594e-13	8.76183e-14
		17.82	7.30052e-13	8.37097e-14	5.89197e-13	8.84465e-14
		17.83	7.30043e-13	8.54175e-14	5.87481e-13	8.78782e-14
		17.84	7.36645e-13	8.53253e-14	5.86484e-13	8.79582e-14
		17.85	7.34223e-13	8.42057e-14	5.91538e-13	8.87173e-14
		17.86	7.3442e-13	8.51267e-14	5.88711e-13	8.76476e-14
		17.87	7.28877e-13	8.34896e-14	5.87516e-13	8.65212e-14
		17.88	7.30561e-13	8.49182e-14	5.86661e-13	8.83241e-14
		17.89	7.31259e-13	8.61908e-14	5.91275e-13	8.70891e-14
		17.9	7.2743e-13	8.51616e-14	5.87081e-13	8.67686e-14
		17.91	7.26771e-13	8.3645e-14	5.83372e-13	8.61041e-14
		17.92	7.29749e-13	8.43171e-14	5.82296e-13	8.71899e-14
		17.93	7.31984e-13	8.54471e-14	5.89211e-13	8.92166e-14
		17.94	7.27866e-13	8.34285e-14	5.88673e-13	8.78332e-14
		17.95	7.23063e-13	8.27242e-14	5.83836e-13	8.73866e-14
		17.96	7.28209e-13	8.69765e-14	5.87687e-13	8.84048e-14
		17.97	7.21997e-13	8.53116e-14	5.90254e-13	8.73286e-14
		17.98	7.28416e-13	8.40091e-14	5.87208e-13	8.75675e-14
		17.99	7.2363e-13	8.41049e-14	5.85967e-13	8.77146e-14
		18	7.26383e-13	8.49298e-14	5.84212e-13	8.77936e-14
		18.01	7.24212e-13	8.43201e-14	5.87159e-13	8.84227e-14
		18.02	7.21899e-13	8.78556e-14	5.82256e-13	8.62012e-14
		18.03	7.22802e-13	8.54082e-14	5.79186e-13	8.48192e-14
		18.04	7.16621e-13	8.49228e-14	5.81252e-13	8.65102e-14
		18.05	7.22432e-13	8.57863e-14	5.77609e-13	8.69604e-14
		18.06	7.1436e-13	8.52553e-14	5.80941e-13	8.87362e-14
		18.07	7.16876e-13	8.28495e-14	5.79811e-13	8.68298e-14
		18.08	7.20064e-13	8.33331e-14	5.74721e-13	9.12626e-14
		18.09	7.21106e-13	8.21721e-14	5.77443e-13	8.85469e-14
		18.1	7.21436e-13	8.19427e-14	5.8132e-13	8.85405e-14
		18.11	7.16707e-13	8.46937e-14	5.82199e-13	9.13186e-14
		18.12	7.19954e-13	8.2562e-14	5.76089e-13	9.03688e-14
		18.13	7.16015e-13	8.34729e-14	5.76359e-13	9.049e-14
		18.14	7.15454e-13	8.44722e-14	5.84094e-13	8.92709e-14
		18.15	7.18688e-13	8.53678e-14	5.77427e-13	9.02322e-14
		18.16	7.19202e-13	8.45537e-14	5.83694e-13	8.95408e-14
		18.17	7.14596e-13	8.64819e-14	5.82505e-13	8.72745e-14
		18.18	7.08325e-13	8.69342e-14	5.78534e-13	9.09859e-14
		18.19	7.0987e-13	8.43533e-14	5.80448e-13	9.09936e-14
		18.2	7.08575e-13	8.36929e-14	5.74485e-13	9.01519e-14
		18.21	7.13095e-13	8.44509e-14	5.7888e-13	9.07489e-14
		18.22	7.0522e-13	8.53997e-14	5.83279e-13	8.85291e-14
		18.23	7.09728e-13	8.44879e-14	5.76539e-13	8.96702e-14
		18.24	7.09358e-13	8.47786e-14	5.76438e-13	9.16976e-14
		18.25	7.14992e-13	8.45238e-14	5.80447e-13	8.94999e-14
		18.26	7.17103e-13	8.49984e-14	5.73426e-13	9.01552e-14
		18.27	7.10292e-13	8.48978e-14	5.81812e-13	8.76517e-14
		18.28	7.1124e-13	8.43567e-14	5.79864e-13	8.84206e-14
		18.29	7.08356e-13	8.49063e-14	5.78243e-13	8.84052e-14
		18.3	7.079e-13	8.27315e-14	5.77144e-13	8.97877e-14
		18.31	7.0601e-13	8.58837e-14	5.85307e-13	8.89555e-14
		18.32	7.04232e-13	8.42482e-14	5.85396e-13	8.79532e-14
		18.33	7.00438e-13	8.45482e-14	5.76512e-13	8.70619e-14
		18.34	7.05903e-13	8.28939e-14	5.80138e-13	9.02358e-14
		18.35	7.01885e-13	8.30938e-14	5.73272e-13	8.89836e-14
		18.36	7.02601e-13	8.25239e-14	5.72584e-13	8.54076e-14
		18.37	7.02796e-13	8.35186e-14	5.77714e-13	8.85537e-14
		18.38	6.99339e-13	8.23555e-14	5.71439e-13	8.79328e-14
		18.39	7.06178e-13	8.36984e-14	5.76738e-13	8.55337e-14
		18.4	7.03144e-13	8.2281e-14	5.80241e-13	8.5766e-14
		18.41	7.04674e-13	8.21328e-14	5.73497e-13	8.66038e-14
		18.42	6.99568e-13	8.33979e-14	5.76232e-13	8.86156e-14
		18.43	6.99955e-13	8.25058e-14	5.66183e-13	8.66618e-14
		18.44	6.95492e-13	8.3084e-14	5.70429e-13	8.80801e-14
		18.45	6.97989e-13	8.30334e-14	5.7258e-13	8.66224e-14
		18.46	6.96603e-13	8.39123e-14	5.69505e-13	8.71982e-14
		18.47	6.94817e-13	8.12467e-14	5.72447e-13	9.05888e-14
		18.48	6.98723e-13	8.05955e-14	5.77354e-13	9.11707e-14
		18.49	6.98172e-13	8.09034e-14	5.75117e-13	9.11714e-14
		18.5	6.99898e-13	8.09015e-14	5.7165e-13	9.10493e-14
		18.51	6.96434e-13	8.30041e-14	5.78136e-13	9.07935e-14
		18.52	6.93305e-13	8.03547e-14	5.78357e-13	9.01985e-14
		18.53	6.93798e-13	8.16462e-14	5.77914e-13	8.95807e-14
		18.54	6.97258e-13	8.22955e-14	5.83067e-13	8.98044e-14
		18.55	6.97962e-13	8.36272e-14	5.76087e-13	9.14186e-14
		18.56	6.95018e-13	8.12839e-14	5.76134e-13	9.11844e-14
		18.57	6.91332e-13	8.25652e-14	5.8165e-13	8.60044e-14
		18.58	6.93892e-13	8.25139e-14	5.74694e-13	8.96498e-14
		18.59	6.92189e-13	8.12506e-14	5.74583e-13	8.80989e-14
		18.6	6.92425e-13	8.13533e-14	5.73631e-13	8.90448e-14
		18.61	6.9312e-13	7.99489e-14	5.72477e-13	8.84742e-14
		18.62	6.86247e-13	8.15246e-14	5.71474e-13	8.95175e-14
		18.63	6.92161e-13	8.14607e-14	5.71727e-13	8.93877e-14
		18.64	6.8716e-13	8.30249e-14	5.67094e-13	8.92122e-14
		18.65	6.88675e-13	8.12555e-14	5.64631e-13	9.06703e-14
		18.66	6.88855e-13	8.07101e-14	5.67621e-13	9.13239e-14
		18.67	6.92581e-13	8.11904e-14	5.7561e-13	8.9876e-14
		18.68	6.89796e-13	8.11728e-14	5.74161e-13	8.86399e-14
		18.69	6.85789e-13	8.08368e-14	5.73444e-13	8.80009e-14
		18.7	6.82066e-13	8.38965e-14	5.70702e-13	8.9309e-14
		18.71	6.88811e-13	7.95273e-14	5.69496e-13	8.80044e-14
		18.72	6.83885e-13	7.97379e-14	5.66694e-13	8.91983e-14
		18.73	6.87625e-13	8.12267e-14	5.67899e-13	8.84985e-14
		18.74	6.84452e-13	7.91049e-14	5.66162e-13	9.04892e-14
		18.75	6.90815e-13	8.05259e-14	5.70022e-13	8.92425e-14
		18.76	6.86458e-13	7.86292e-14	5.67963e-13	8.84813e-14
		18.77	6.81711e-13	8.09836e-14	5.6804e-13	8.72606e-14
		18.78	6.8361e-13	8.00071e-14	5.73169e-13	8.70692e-14
		18.79	6.85672e-13	7.94305e-14	5.71341e-13	8.87525e-14
		18.8	6.78483e-13	8.11418e-14	5.73662e-13	8.94963e-14
		18.81	6.86669e-13	8.0653e-14	5.78178e-13	8.61806e-14
		18.82	6.78569e-13	8.20972e-14	5.65744e-13	8.69402e-14
		18.83	6.84968e-13	8.31355e-14	5.68211e-13	8.78805e-14
		18.84	6.85965e-13	8.07399e-14	5.67372e-13	8.77084e-14
		18.85	6.85607e-13	8.20557e-14	5.6916e-13	8.65198e-14
		18.86	6.82658e-13	7.94409e-14	5.70355e-13	8.69207e-14
		18.87	6.80468e-13	8.16313e-14	5.66909e-13	8.60023e-14
		18.88	6.78266e-13	7.92705e-14	5.71181e-13	8.55712e-14
		18.89	6.77537e-13	8.19247e-14	5.6759e-13	8.65382e-14
		18.9	6.83768e-13	8.10836e-14	5.67322e-13	8.77096e-14
		18.91	6.82742e-13	8.14364e-14	5.70519e-13	8.54521e-14
		18.92	6.78886e-13	8.02094e-14	5.66226e-13	8.52482e-14
		18.93	6.75506e-13	8.13194e-14	5.70974e-13	8.47038e-14
		18.94	6.78412e-13	7.98046e-14	5.66305e-13	8.70209e-14
		18.95	6.76122e-13	7.99214e-14	5.61399e-13	8.76386e-14
		18.96	6.77172e-13	8.24402e-14	5.65409e-13	8.91109e-14
		18.97	6.72047e-13	8.16988e-14	5.63068e-13	8.54095e-14
		18.98	6.77311e-13	8.04677e-14	5.69534e-13	8.80854e-14
		18.99	6.72629e-13	8.08751e-14	5.63832e-13	8.93111e-14
		19	6.71298e-13	7.9505e-14	5.62809e-13	8.97498e-14
		19.01	6.75927e-13	8.16948e-14	5.61986e-13	8.76198e-14
		19.02	6.77198e-13	8.09399e-14	5.58345e-13	8.77257e-14
		19.03	6.7848e-13	8.39991e-14	5.63417e-13	8.695e-14
		19.04	6.75264e-13	8.2603e-14	5.56899e-13	8.67338e-14
		19.05	6.7735e-13	7.98204e-14	5.53969e-13	8.56826e-14
		19.06	6.75942e-13	8.23717e-14	5.60226e-13	8.51075e-14
		19.07	6.72016e-13	8.02306e-14	5.5633e-13	8.61348e-14
		19.08	6.71517e-13	8.07999e-14	5.61886e-13	8.76596e-14
		19.09	6.73578e-13	7.94084e-14	5.55321e-13	8.72964e-14
		19.1	6.6514e-13	7.92098e-14	5.53724e-13	8.80711e-14
		19.11	6.66583e-13	8.08217e-14	5.5687e-13	8.61434e-14
		19.12	6.70291e-13	8.15875e-14	5.52411e-13	8.58124e-14
		19.13	6.68222e-13	7.99116e-14	5.5841e-13	8.3863e-14
		19.14	6.69251e-13	7.91284e-14	5.5379e-13	8.59561e-14
		19.15	6.71372e-13	7.89054e-14	5.50161e-13	8.51158e-14
		19.16	6.6749e-13	7.66055e-14	5.54271e-13	8.58391e-14
		19.17	6.70448e-13	7.98352e-14	5.56603e-13	8.34236e-14
		19.18	6.65655e-13	7.9668e-14	5.56453e-13	8.36489e-14
		19.19	6.68441e-13	8.01497e-14	5.58411e-13	8.4681e-14
		19.2	6.63068e-13	7.95517e-14	5.48923e-13	8.73152e-14
		19.21	6.66483e-13	7.96724e-14	5.52029e-13	8.71837e-14
		19.22	6.64706e-13	8.04139e-14	5.53342e-13	8.51314e-14
		19.23	6.59037e-13	8.09087e-14	5.48201e-13	8.65765e-14
		19.24	6.62266e-13	7.9669e-14	5.54411e-13	8.38248e-14
		19.25	6.61418e-13	7.90453e-14	5.53498e-13	8.66839e-14
		19.26	6.6292e-13	8.04709e-14	5.53876e-13	8.53768e-14
		19.27	6.64966e-13	7.75466e-14	5.5131e-13	8.3974e-14
		19.28	6.66061e-13	7.97973e-14	5.56395e-13	8.33653e-14
		19.29	6.65489e-13	7.84558e-14	5.52831e-13	8.56804e-14
		19.3	6.61398e-13	7.92644e-14	5.57254e-13	8.69211e-14
		19.31	6.63533e-13	7.83446e-14	5.50046e-13	8.84641e-14
		19.32	6.58881e-13	7.93008e-14	5.50434e-13	8.58983e-14
		19.33	6.62832e-13	8.05454e-14	5.49074e-13	8.51741e-14
		19.34	6.63586e-13	7.88607e-14	5.53326e-13	8.65288e-14
		19.35	6.62688e-13	7.89802e-14	5.49515e-13	8.68146e-14
		19.36	6.59173e-13	7.92511e-14	5.48748e-13	8.32942e-14
		19.37	6.60879e-13	7.76777e-14	5.46607e-13	8.47863e-14
		19.38	6.53668e-13	7.94526e-14	5.52016e-13	8.64051e-14
		19.39	6.6326e-13	7.90154e-14	5.46295e-13	8.57807e-14
		19.4	6.58397e-13	7.97471e-14	5.49654e-13	8.73801e-14
		19.41	6.58844e-13	7.78164e-14	5.45489e-13	8.69526e-14
		19.42	6.52423e-13	7.86946e-14	5.54949e-13	8.45192e-14
		19.43	6.53265e-13	7.85639e-14	5.52621e-13	8.52562e-14
		19.44	6.55038e-13	7.9273e-14	5.51038e-13	8.53929e-14
		19.45	6.55944e-13	7.85578e-14	5.53267e-13	8.55546e-14
		19.46	6.52402e-13	7.94008e-14	5.493e-13	8.58119e-14
		19.47	6.53483e-13	7.9139e-14	5.48183e-13	8.40927e-14
		19.48	6.50025e-13	7.76201e-14	5.43336e-13	8.45131e-14
		19.49	6.49538e-13	7.82923e-14	5.44264e-13	8.6205e-14
		19.5	6.50062e-13	7.93196e-14	5.45653e-13	8.59074e-14
		19.51	6.55285e-13	7.86349e-14	5.47925e-13	8.66841e-14
		19.52	6.50596e-13	8.03426e-14	5.45293e-13	8.49382e-14
		19.53	6.54685e-13	7.80854e-14	5.43114e-13	8.48145e-14
		19.54	6.51167e-13	7.96936e-14	5.4661e-13	8.49929e-14
		19.55	6.48961e-13	7.94075e-14	5.41555e-13	8.65064e-14
		19.56	6.49579e-13	7.89321e-14	5.43588e-13	8.65623e-14
		19.57	6.45832e-13	8.03733e-14	5.46048e-13	8.457e-14
		19.58	6.49745e-13	7.94729e-14	5.36926e-13	8.62505e-14
		19.59	6.50868e-13	7.90029e-14	5.42611e-13	8.49464e-14
		19.6	6.48082e-13	7.79275e-14	5.38589e-13	8.75868e-14
		19.61	6.52608e-13	7.9876e-14	5.37882e-13	8.69484e-14
		19.62	6.51346e-13	7.88004e-14	5.37314e-13	8.53943e-14
		19.63	6.46689e-13	7.7699e-14	5.42634e-13	8.49612e-14
		19.64	6.41524e-13	7.73438e-14	5.42496e-13	8.64178e-14
		19.65	6.45316e-13	7.71157e-14	5.44934e-13	8.48468e-14
		19.66	6.47413e-13	8.03479e-14	5.45651e-13	8.64773e-14
		19.67	6.44347e-13	8.16716e-14	5.48646e-13	8.60097e-14
		19.68	6.43173e-13	7.7131e-14	5.37703e-13	8.69564e-14
		19.69	6.43564e-13	7.72794e-14	5.36583e-13	8.74528e-14
		19.7	6.48584e-13	7.72971e-14	5.41241e-13	8.55784e-14
		19.71	6.42077e-13	7.87508e-14	5.38742e-13	8.55158e-14
		19.72	6.42591e-13	7.84986e-14	5.4281e-13	8.15162e-14
		19.73	6.48244e-13	7.62284e-14	5.42255e-13	8.63944e-14
		19.74	6.4302e-13	7.759e-14	5.4107e-13	8.65678e-14
		19.75	6.40469e-13	7.62389e-14	5.43055e-13	8.49187e-14
		19.76	6.39848e-13	7.831e-14	5.45757e-13	8.41714e-14
		19.77	6.36396e-13	7.69441e-14	5.38898e-13	8.43886e-14
		19.78	6.34275e-13	7.68072e-14	5.38023e-13	8.63705e-14
		19.79	6.40437e-13	7.87645e-14	5.4502e-13	8.52172e-14
		19.8	6.36145e-13	8.06203e-14	5.34583e-13	8.48396e-14
		19.81	6.3538e-13	7.74337e-14	5.32143e-13	8.65095e-14
		19.82	6.3363e-13	7.68549e-14	5.33323e-13	8.4307e-14
		19.83	6.37425e-13	7.72795e-14	5.40596e-13	8.30919e-14
		19.84	6.37862e-13	7.78664e-14	5.40778e-13	8.37782e-14
		19.85	6.37674e-13	7.83288e-14	5.43394e-13	8.23088e-14
		19.86	6.36951e-13	7.81301e-14	5.36741e-13	8.49665e-14
		19.87	6.3097e-13	7.9775e-14	5.39448e-13	8.70115e-14
		19.88	6.31191e-13	8.04674e-14	5.37447e-13	8.77871e-14
		19.89	6.33413e-13	7.67573e-14	5.4154e-13	8.45036e-14
		19.9	6.27051e-13	7.9399e-14	5.44459e-13	8.42129e-14
		19.91	6.31019e-13	7.65186e-14	5.39609e-13	8.38653e-14
		19.92	6.29182e-13	7.96937e-14	5.38363e-13	8.49181e-14
		19.93	6.34094e-13	7.75711e-14	5.43518e-13	8.6154e-14
		19.94	6.26335e-13	7.94014e-14	5.41115e-13	8.55037e-14
		19.95	6.28506e-13	7.58134e-14	5.46453e-13	8.56353e-14
		19.96	6.29e-13	7.86967e-14	5.41576e-13	8.60542e-14
[truncated: 7,120 more rows]
