# Supplementary material for: Physiological roles of endocytosis and presynaptic scaffold in vesicle replenishment at fast and slow central synapses
Source: eLife. 2024 Jun 3;12:RP90497. doi: 10.7554/eLife.90497 (PMC11147502; doi:10.7554/eLife.90497)
Supplement: Figure 1—source data 1. [file elife-90497-fig1-data1.xlsx]

## Sheet: 5 ms
		Figure 1A_Cm traces								Figure 1A_endo Rate_bar graph data
		Time (S)	Control		Dynasore		Pitstop-2				Control	Dynasore	Pitstop-2
			Mean	SEM	Mean	SEM	Mean	SEM		Mean	2.88e-14	1.03e-14	1.01e-14
										SEM	3.74e-15	2.82e-15	3.37e-15
		0.01	3.69561e-15	2.02e-15	-4.86109e-15	3.39697e-14	-1.35958e-14	9.54101e-15		n number	5	5	5
		0.03	4.29561e-15	2.81758e-15	4.26321e-15	1.42091e-14	-3.08638e-15	8.6623e-15		p-value	-	0.004	0.006
		0.05	3.12053e-15	5.09215e-15	3.78246e-15	1.66576e-14	-2.53367e-15	5.64255e-15
		0.07	6.288e-15	2.91106e-15	8.83372e-15	1.55623e-14	-2.44276e-16	3.91696e-15
		0.09	4.69561e-15	6.46283e-15	1.05268e-14	1.41236e-14	-4.0777e-15	6.44507e-15
		0.11	2.14064e-15	1.78873e-15	7.09224e-16	1.51147e-14	-1.30939e-18	3.68693e-15
		0.13	8.35792e-16	2.96105e-15	3.3119e-15	1.61532e-14	1.64365e-15	5.02612e-15
		0.15	1.13062e-14	5.7729e-15	6.39317e-15	1.71455e-14	2.45686e-16	3.7888e-15
		0.17	1.71711e-15	2.20131e-15	2.7442e-15	1.01013e-14	1.84546e-15	5.27303e-15
		0.19	3.03695e-15	3.44063e-15	7.3742e-15	1.43296e-14	4.87205e-15	2.87847e-15
		0.21	6.28124e-15	3.95862e-15	1.97837e-15	1.39455e-14	3.30709e-16	4.61593e-15
		0.23	5.47702e-15	5.77504e-15	1.54189e-15	1.2047e-14	3.80792e-15	4.82834e-15
		0.25	1.21096e-15	5.41042e-15	2.16854e-15	1.36378e-14	3.32731e-15	4.37117e-15
		0.27	5.1258e-15	4.64414e-15	4.4161e-15	9.77019e-15	-7.58082e-16	4.4802e-15
		0.29	3.88267e-15	2.77392e-15	-2.57345e-15	1.2412e-14	-1.095e-14	4.61564e-15
		0.31	-4.96931e-16	2.66682e-15	-2.39648e-15	9.0078e-15	2.54367e-15	4.21919e-15
		0.33	3.59961e-16	2.43492e-15	-1.75484e-15	7.72378e-15	-2.09211e-15	3.57045e-15
		0.35	1.21728e-15	1.20959e-15	-4.11128e-15	1.09562e-14	-3.33618e-15	4.76338e-15
		0.37	5.54559e-15	3.74583e-15	2.55969e-15	9.16064e-15	-6.40102e-15	2.13047e-15
		0.39	3.48409e-15	3.59272e-15	-5.57983e-15	1.17401e-14	2.25626e-15	6.26688e-15
		0.41	3.15305e-15	2.62696e-15	1.55074e-15	7.47258e-15	-5.52935e-16	4.92298e-15
		0.43	1.28703e-16	2.65634e-15	-1.49157e-15	9.28721e-15	2.30514e-15	1.4992e-15
		0.45	1.8004e-15	2.53463e-15	6.39591e-16	8.95292e-15	-6.10767e-15	5.32876e-15
		0.47	-5.29781e-15	2.85381e-15	9.91435e-16	6.41096e-15	3.14023e-15	6.53749e-15
		0.49	-3.69603e-15	4.865e-15	1.86169e-16	9.19426e-15	-3.36509e-15	2.66379e-15
		0.51	-5.18473e-15	2.08312e-15	-6.13944e-15	5.05869e-15	-4.98053e-16	3.98048e-15
		0.53	2.07776e-15	4.70917e-15	-9.97148e-16	7.69452e-15	-1.26511e-14	1.23021e-14
		0.55	5.86804e-15	5.14443e-15	2.42488e-15	8.74054e-15	-2.18494e-14	1.34278e-14
		0.57	1.42373e-15	5.06745e-15	2.41994e-15	9.47459e-15	-2.11033e-14	1.64897e-14
		0.59	6.33629e-15	5.75184e-15	-8.38514e-16	9.82358e-15	-1.59098e-14	1.22842e-14
		0.61	1.10792e-15	3.72689e-15	-4.59662e-15	5.26308e-15	-1.56042e-14	1.09159e-14
		0.63	-7.08884e-16	7.12404e-15	1.34403e-15	6.76597e-15	-2.0078e-14	1.40197e-14
		0.65	3.68041e-16	5.21e-15	-1.322e-15	6.02096e-15	-1.86438e-15	3.4469e-15
		0.67	1.59533e-15	4.17039e-15	1.79485e-15	1.02088e-14	-3.88781e-16	4.98438e-15
		0.69	-9.76595e-18	5.90574e-15	-1.91832e-15	6.45225e-15	5.60479e-15	7.16252e-15
		0.71	-9.96999e-15	1.01427e-14	-1.30346e-16	5.00721e-15	1.32419e-15	7.38143e-15
		0.73	-5.83393e-15	5.31267e-15	-2.72804e-15	7.35242e-15	-2.10567e-15	7.43195e-15
		0.75	-3.79518e-15	4.30625e-15	-1.62955e-15	5.58774e-15	1.56888e-15	6.4665e-15
		0.77	-1.52907e-15	5.51254e-15	4.70762e-16	5.51447e-15	-7.5135e-15	3.72173e-15
		0.79	-5.30136e-15	3.02407e-15	3.13453e-15	6.98682e-15	-2.71248e-15	9.07699e-15
		0.81	-1.04909e-14	7.2789e-15	-8.60331e-15	4.42882e-15	-1.89435e-16	6.16437e-15
		0.83	-2.36546e-15	3.92254e-15	-2.59758e-17	5.94122e-15	-2.93508e-15	6.50081e-15
		0.85	-9.33443e-15	5.18535e-15	7.44112e-16	5.22242e-15	-2.49966e-15	9.43899e-15
		0.87	-6.79e-15	3.77764e-15	-1.40793e-15	5.63039e-15	-2.32323e-15	3.65087e-15
		0.89	-4.74819e-15	9.83627e-15	-2.83509e-15	6.12917e-15	3.51309e-15	4.31485e-15
		0.91	-4.51849e-16	2.73946e-15	-3.21816e-15	4.15349e-15	-7.58776e-16	6.22951e-15
		0.93	-9.56318e-15	8.4529e-15	-3.67328e-16	3.19614e-15	-1.88011e-15	3.09001e-15
		0.95	-4.33321e-15	6.76886e-15	7.27929e-17	8.35363e-15	-2.36735e-15	6.56394e-15
		0.97	-5.9724e-15	8.92324e-15	-4.61472e-15	5.28208e-15	-3.17344e-15	6.83603e-15
		0.99	-3.9698e-15	5.22282e-15	-2.15855e-15	8.27807e-15	-1.74081e-15	6.01394e-15
		1.01	-3.83358e-15	6.67206e-15	6.57706e-15	9.75138e-15	-5.44297e-15	3.40608e-15
		1.03	-5.83684e-15	3.60938e-15	-8.25029e-15	5.77122e-15	2.28435e-15	6.00253e-15
		1.05	-8.79915e-15	6.66254e-15	-5.79718e-15	4.83696e-15	-1.8937e-16	8.99218e-15
		1.07	-3.39494e-15	2.53236e-15	-1.01148e-14	2.42192e-15	-1.89664e-15	5.21196e-15
		1.09	-5.71326e-15	6.97153e-15	-9.03989e-15	3.45927e-15	-1.67465e-15	7.40301e-15
		1.11	-8.07912e-15	5.66508e-15	-2.33239e-15	5.07884e-15	-4.47472e-15	4.29943e-15
		1.13	-5.83699e-15	5.79186e-15	-4.581e-15	3.89363e-15	-3.41551e-15	4.80811e-15
		1.15	-5.35642e-15	8.41164e-15	7.49477e-16	2.6494e-15	-3.60496e-15	5.55502e-15
		1.17	-4.33428e-15	5.53968e-15	-5.64247e-15	2.30034e-15	-3.75137e-15	5.03428e-15
		1.19	-2.56598e-15	3.92957e-15	-5.1872e-15	3.42256e-15	-6.55698e-15	3.05142e-15
		1.21	-4.71427e-15	7.74324e-15	-6.00787e-15	2.62063e-15	-3.14742e-15	3.45448e-15
		1.23	-6.80138e-15	8.6779e-15	-5.73155e-15	5.87152e-15	-4.68313e-15	5.39884e-15
		1.25	-7.02331e-15	7.97253e-15	-4.44609e-15	1.86075e-15	-7.27179e-15	3.92123e-15
		1.27	-7.70208e-15	8.90102e-15	4.28758e-16	7.12639e-15	-3.45125e-16	6.30481e-15
		1.29	-8.76645e-16	5.74902e-15	-8.31879e-15	5.38599e-15	-5.41955e-15	6.03801e-15
		1.31	-8.2804e-15	7.00992e-15	-1.43971e-15	4.38409e-15	-2.77664e-15	1.72634e-15
		1.33	-6.1386e-15	6.34153e-15	-9.13766e-15	3.3884e-15	-4.98198e-15	4.60269e-15
		1.35	-7.19182e-16	3.30832e-15	-3.71375e-15	3.03468e-15	1.19242e-15	5.35539e-15
		1.37	-4.47781e-15	2.35069e-15	-1.97592e-15	4.01757e-15	-1.03983e-15	6.10916e-15
		1.39	-5.74101e-15	7.18861e-15	-6.46191e-15	4.32001e-15	4.08243e-16	3.51131e-15
		1.41	-1.02102e-14	2.48355e-15	-4.79628e-15	5.82588e-15	5.26719e-16	2.84886e-15
		1.43	2.35325e-15	3.99515e-15	-1.02744e-14	3.05104e-15	-1.12541e-14	4.01971e-15
		1.45	-9.49489e-15	4.98361e-15	-6.53925e-15	2.96636e-15	-1.51195e-15	3.20041e-15
		1.47	-6.82937e-15	3.87595e-15	-5.71026e-15	3.1116e-15	-8.55468e-15	3.97387e-15
		1.49	-2.71358e-15	4.53064e-15	-5.15058e-15	3.65443e-15	9.31428e-16	3.672e-15
		1.51	-1.01537e-14	6.984e-15	-5.31085e-15	4.40508e-15	1.73259e-17	2.21748e-15
		1.53	-7.87574e-15	3.4822e-15	-6.23744e-15	1.17249e-15	-6.104e-16	4.70154e-15
		1.55	-3.7998e-15	5.30651e-15	-4.06841e-15	3.56607e-15	-4.40169e-15	6.26455e-15
		1.57	-1.70138e-16	2.76802e-15	-3.64558e-15	1.96228e-15	-4.41821e-15	3.43567e-15
		1.59	-9.38385e-15	5.78074e-15	-8.73146e-15	1.90435e-15	9.69875e-16	5.3396e-15
		1.61	-1.09683e-14	5.51209e-15	-6.86038e-15	7.5243e-16	-1.99321e-15	1.21986e-15
		1.63	-7.67706e-15	5.43235e-15	-7.32863e-15	4.64612e-15	-1.11521e-14	5.94515e-15
		1.65	-2.23844e-15	4.75435e-15	-9.98186e-15	2.71654e-15	-5.72829e-15	5.3756e-15
		1.67	-8.68576e-15	6.52884e-15	-4.81394e-15	1.68384e-15	-6.76389e-15	3.40762e-15
		1.69	-5.9985e-15	5.09788e-15	-6.39727e-15	4.95473e-15	-7.61108e-15	6.11712e-15
		1.71	-9.60442e-15	4.34189e-15	-3.48906e-15	2.82344e-15	-2.27068e-15	2.98794e-15
		1.73	-5.50435e-15	6.79774e-15	-4.31804e-15	4.02489e-15	2.97884e-15	4.41321e-15
		1.75	-1.2618e-14	1.05227e-14	-7.58993e-15	2.74503e-15	-3.23525e-15	4.77741e-15
		1.77	-4.17532e-15	4.35281e-15	-1.16027e-14	2.46552e-15	-5.87686e-15	4.24709e-15
		1.79	-2.16927e-15	1.58932e-15	-5.96548e-15	2.51992e-15	-7.19949e-15	4.04491e-15
		1.81	-4.73402e-15	5.93053e-15	-2.73458e-15	7.2441e-16	-5.46181e-15	2.6631e-15
		1.83	-5.03051e-15	6.26121e-15	-9.8628e-15	1.73333e-15	-3.16221e-15	3.13828e-15
		1.85	-4.23101e-15	3.26812e-15	-4.40658e-15	3.60968e-15	-5.84309e-15	4.78847e-15
		1.87	-9.36646e-15	4.74891e-15	-1.8641e-15	3.13754e-15	-1.09757e-14	5.02722e-15
		1.89	4.93018e-16	4.10935e-15	-4.88564e-15	2.87051e-15	-2.9444e-15	4.5427e-15
		1.91	-1.01068e-14	9.19015e-15	-3.31987e-15	1.74619e-15	-8.45013e-15	3.59427e-15
		1.93	-3.57805e-15	4.45064e-15	-7.76746e-15	2.63082e-15	-2.98901e-15	2.89579e-15
		1.95	-1.10221e-14	8.76697e-15	-4.19128e-15	3.50904e-15	1.44964e-15	1.56561e-15
		1.97	-6.79061e-15	4.80229e-15	-2.8477e-15	3.61605e-15	9.01225e-16	4.58741e-15
		1.99	-9.8782e-15	7.67535e-15	-3.96059e-15	2.763e-15	-1.20048e-15	3.91814e-15
		2.01	-3.8362e-15	3.64367e-15	-1.49408e-15	2.44208e-15	-1.32883e-15	4.12897e-15
		2.03	-6.76588e-15	1.04937e-15	-6.86194e-15	2.85127e-15	-4.92407e-15	8.71874e-15
		2.05	-3.16238e-16	3.63104e-15	-5.03618e-15	4.6322e-15	-5.11271e-15	1.27107e-14
		2.07	-6.10374e-15	4.10009e-15	-1.09275e-14	2.85099e-15	-3.68129e-15	3.68942e-15
		2.09	-1.19642e-14	7.58234e-15	-5.87279e-15	1.14474e-15	-4.66521e-15	2.11384e-15
		2.11	-9.01154e-15	5.4627e-15	-8.04112e-15	2.94565e-15	-1.68259e-15	9.15704e-16
		2.13	-8.79941e-15	6.8109e-15	-9.3233e-15	2.94131e-15	-2.7362e-15	4.55577e-15
		2.15	-7.55436e-15	6.30689e-15	-4.75543e-15	3.82322e-15	1.6077e-15	2.07282e-15
		2.17	-5.67084e-15	4.74454e-15	-5.71394e-15	4.23207e-15	2.77967e-15	3.91877e-15
		2.19	-6.73108e-15	4.39171e-15	-1.58586e-15	1.43278e-15	4.57597e-16	4.90625e-15
		2.21	-9.52661e-15	5.06853e-15	-6.12424e-15	3.33389e-15	6.10388e-15	1.38521e-15
		2.23	-1.08617e-14	7.78118e-15	-6.30477e-15	2.77796e-15	1.30039e-15	3.22569e-15
		2.25	-8.74865e-15	4.2244e-15	-7.50791e-15	2.20319e-15	3.94186e-15	2.70527e-15
		2.27	-8.27486e-15	7.34021e-15	-8.489e-15	1.67253e-15	2.26181e-15	1.95065e-15
		2.29	-6.53826e-15	3.78642e-15	-1.13007e-14	4.30159e-15	-7.35909e-18	5.98749e-15
		2.31	-1.14455e-14	8.03261e-15	-1.03797e-14	1.95329e-15	1.30193e-15	2.79269e-15
		2.33	-3.42495e-15	7.55862e-15	-1.7945e-15	1.18009e-15	-3.28145e-16	5.65105e-15
		2.35	1.24947e-15	6.39824e-15	-9.4832e-15	2.65784e-15	-3.31079e-15	2.19204e-15
		2.37	-5.80995e-15	6.36947e-15	-8.00057e-15	1.64922e-15	-7.89212e-15	3.604e-15
		2.39	-5.91824e-15	4.61608e-15	-1.52841e-15	1.40797e-15	-4.92497e-15	4.34884e-15
		2.41	3.20836e-16	5.87521e-15	-8.99737e-15	5.94981e-15	-5.57199e-15	3.72749e-15
		2.43	-3.94472e-15	7.42084e-15	-5.94802e-15	2.27527e-15	2.49197e-16	5.8396e-15
		2.45	-2.79025e-15	5.83172e-15	4.00709e-15	2.90276e-15	-2.37498e-15	4.04948e-15
		2.47	2.05194e-15	7.79622e-15	-5.28481e-15	1.51038e-15	-7.70935e-15	5.92731e-15
		2.49	4.68306e-16	4.24363e-15	-5.70724e-15	4.80038e-15	-5.27623e-15	2.182e-15
		2.51	-5.4262e-15	7.77681e-15	-4.4714e-15	3.8413e-15	-1.12766e-15	4.64083e-15
		2.53	-5.76952e-15	5.19088e-15	-3.46523e-15	2.00484e-15	-8.99308e-15	5.8829e-15
		2.55	-2.99449e-15	7.55978e-15	-5.61865e-15	2.04272e-15	3.3994e-15	2.95396e-15
		2.57	-3.56112e-15	3.75852e-15	-8.17245e-15	5.93605e-15	6.95929e-16	3.38423e-15
		2.59	-8.57396e-15	4.86627e-15	8.46021e-16	2.74247e-15	-1.04176e-15	4.18204e-15
		2.61	-3.53538e-15	7.50828e-15	-4.72863e-15	3.05071e-15	3.17012e-15	1.93311e-15
		2.63	-7.04641e-15	5.64255e-15	-6.91275e-15	3.77826e-15	-1.03472e-15	3.17087e-15
		2.65	-5.9384e-15	5.08327e-15	-3.27713e-15	1.95754e-15	-1.60372e-15	7.20825e-16
		2.67	-5.64749e-15	7.66274e-15	-6.8295e-15	2.42524e-15	2.48796e-16	7.17527e-15
		2.69	-6.7686e-15	5.54051e-15	-5.42527e-15	2.09685e-15	4.54998e-15	6.90458e-15
		2.71	-5.90155e-15	8.83295e-15	-4.82176e-15	1.47075e-15	1.42943e-15	8.01146e-15
		2.73	-7.14088e-15	6.50847e-15	-3.70774e-15	4.9327e-15	1.00548e-15	5.53254e-15
		2.75	-5.83751e-15	6.38623e-15	-1.54399e-15	3.25276e-15	-3.33903e-15	6.81685e-15
		2.77	-9.07174e-15	7.03668e-15	-9.28087e-15	2.9841e-15	-4.00143e-15	2.28934e-15
		2.79	-5.75694e-15	4.21513e-15	1.76167e-15	4.30796e-15	-1.17744e-14	3.05992e-15
		2.81	-1.44424e-15	4.56967e-15	-5.46082e-15	3.77489e-15	-4.35674e-15	3.90879e-15
		2.83	-9.495e-15	9.32352e-15	-6.67104e-15	9.15649e-16	-1.22482e-15	3.51416e-15
		2.85	-9.93697e-15	6.37198e-15	-3.98557e-15	1.40846e-15	-4.14386e-15	2.44798e-15
		2.87	-9.29144e-15	9.39884e-15	-2.49281e-15	2.56822e-15	3.92813e-15	3.36181e-15
		2.89	-7.75297e-15	4.50453e-15	-8.59838e-15	3.16437e-15	6.05097e-15	4.80121e-15
		2.91	-6.07386e-15	6.76319e-15	-4.54668e-15	3.06729e-15	1.04853e-15	3.86526e-15
		2.93	-7.41268e-16	4.93415e-15	-2.48557e-15	3.46457e-15	-1.09738e-15	4.12092e-15
		2.95	-6.24646e-15	5.96451e-15	-1.71994e-15	2.72814e-15	1.71801e-15	3.96221e-15
		2.97	-2.26855e-15	3.32193e-15	-9.53031e-16	1.70466e-15	6.25455e-16	2.91102e-15
		2.99	-3.64745e-15	2.91324e-15	-1.07529e-15	4.85915e-15	-1.71151e-15	2.40145e-15
		3.01	-6.53604e-16	2.63683e-15	-5.60001e-15	3.36934e-15	-1.48795e-15	6.86724e-15
		3.03	-5.39347e-15	5.02457e-15	-6.75239e-15	2.92459e-15	2.12269e-17	4.20617e-15
		3.05	-3.97178e-15	6.53575e-15	-1.61311e-15	2.5401e-15	-6.07251e-15	3.88966e-15
		3.07	-1.20393e-15	5.94075e-15	-3.84749e-15	2.41272e-15	-5.37756e-15	4.8502e-15
		3.09	-2.45452e-15	5.66772e-15	-2.0196e-15	4.4323e-15	-4.44618e-15	2.67038e-15
		3.11	-6.07565e-15	4.16603e-15	-4.39604e-15	2.48226e-15	-5.9116e-15	5.11802e-15
		3.13	-9.98252e-16	5.78951e-15	-1.41389e-15	1.98019e-15	-3.95456e-15	6.23218e-15
		3.15	-4.38666e-15	6.92422e-15	-2.38725e-15	3.3975e-15	-7.61404e-15	3.18845e-15
		3.17	-1.64337e-15	2.87025e-15	-6.64894e-15	4.55323e-15	-1.79871e-15	4.19276e-15
		3.19	8.46349e-16	1.99206e-15	-1.15629e-15	2.90615e-15	-6.72402e-15	7.92236e-15
		3.21	-6.1016e-15	3.30811e-15	-7.96276e-15	2.5753e-15	1.2245e-15	7.05802e-15
		3.23	-6.01461e-15	4.29498e-15	-7.25411e-16	2.71068e-15	2.0635e-15	6.27579e-15
		3.25	-3.02772e-15	3.72708e-15	-5.62458e-15	4.55064e-15	-1.34631e-14	4.15645e-15
		3.27	-2.61105e-15	3.97283e-15	-2.92278e-15	4.19269e-15	-7.44424e-15	6.63854e-15
		3.29	-1.52415e-15	5.07971e-15	-3.34337e-15	1.79404e-15	-1.00274e-14	6.10457e-15
		3.31	-5.05375e-15	5.58923e-15	-3.49178e-15	2.78134e-15	-9.51174e-15	7.71353e-15
		3.33	-6.14699e-16	3.07332e-15	-2.03049e-15	2.2037e-15	-8.55029e-16	4.39803e-15
		3.35	-1.78705e-15	3.91148e-15	8.49003e-16	2.83194e-15	-1.39008e-15	4.54422e-15
		3.37	-9.98748e-16	4.33588e-15	-5.55893e-15	1.4968e-15	6.07009e-15	6.77877e-15
		3.39	-5.64679e-15	5.20589e-15	-4.04742e-15	9.50553e-16	-3.8746e-15	2.57305e-15
		3.41	-5.06819e-15	3.23522e-15	-2.85243e-15	1.62747e-15	-5.09985e-15	2.92721e-15
		3.43	8.35848e-17	2.38547e-15	-8.87289e-16	4.52233e-15	-2.61868e-15	3.24392e-15
		3.45	-1.31232e-15	2.37677e-15	-7.13222e-15	3.57289e-15	-6.28538e-15	4.04921e-15
		3.47	-2.88743e-15	5.89833e-15	-5.53728e-15	1.16348e-15	-3.39199e-16	4.98638e-15
		3.49	1.41963e-15	1.45333e-15	-6.03287e-15	3.33338e-15	-3.87097e-15	4.81865e-15
		3.51	-3.11451e-15	4.95487e-15	-7.28254e-16	3.94294e-15	1.42764e-15	3.04602e-15
		3.53	-7.28912e-15	4.60225e-15	-3.31639e-15	2.40075e-15	-4.19314e-15	8.1e-15
		3.55	1.16213e-15	3.05455e-15	-1.35979e-15	9.91754e-16	-1.05869e-14	5.89451e-15
		3.57	-9.22261e-15	7.81326e-15	-1.74639e-15	1.24267e-15	3.9198e-16	4.43351e-15
		3.59	-4.76273e-15	4.0968e-15	-4.13451e-15	3.84221e-15	-6.6072e-15	7.55633e-15
		3.61	-3.08168e-15	1.82895e-15	-4.72895e-16	2.7779e-15	-2.55161e-15	1.40631e-15
		3.63	-3.79549e-15	3.53928e-15	-2.00123e-15	1.49346e-15	-1.35744e-14	8.52201e-15
		3.65	-2.5572e-15	2.14879e-15	1.34723e-15	1.57769e-15	-6.54266e-15	5.59048e-15
		3.67	-2.66516e-15	3.90529e-15	3.26744e-15	1.97235e-15	-6.88846e-15	5.20807e-15
		3.69	-3.21778e-15	5.94702e-15	-5.68219e-15	7.65213e-16	-6.89507e-15	6.47264e-15
		3.71	-1.62325e-15	4.36097e-15	-5.92382e-15	1.97591e-15	-1.36793e-14	7.846e-15
		3.73	-7.90644e-16	4.39725e-15	1.40261e-15	6.29731e-15	-4.35164e-15	4.31236e-15
		3.75	-2.84734e-15	2.94006e-15	-4.21614e-15	1.88805e-15	-7.55447e-15	4.97468e-15
		3.77	-1.17007e-15	3.84805e-15	4.48009e-16	2.18687e-15	-1.79725e-15	4.39692e-15
		3.79	-8.5285e-15	5.33217e-15	1.84125e-15	1.3151e-15	-3.44434e-15	1.70127e-15
		3.81	-1.7535e-15	3.27831e-15	6.36394e-16	2.00312e-15	-3.67314e-15	3.05661e-15
		3.83	-1.95133e-15	6.5757e-15	-4.8059e-16	2.65986e-15	-6.70162e-15	3.71321e-15
		3.85	-1.96872e-15	6.43448e-15	1.71348e-15	3.15742e-15	-2.00317e-15	1.57026e-15
		3.87	1.63567e-15	2.37124e-15	1.25582e-15	2.97364e-15	-1.8104e-16	3.33742e-15
		3.89	3.76882e-15	2.38971e-15	3.19068e-16	2.25293e-15	-4.09173e-15	5.08734e-15
		3.91	-4.46848e-15	4.93205e-15	-4.18523e-15	2.63906e-15	-2.44121e-15	3.42001e-15
		3.93	1.202e-15	3.1257e-15	-7.56624e-16	3.70319e-15	-2.32611e-15	3.41639e-15
		3.95	3.13244e-15	3.74549e-15	-1.54338e-15	2.10989e-15	-3.97249e-15	5.88018e-15
		3.97	-1.94445e-16	4.46494e-15	1.62035e-16	2.11183e-15	-2.67086e-15	3.08279e-15
		3.99	-2.94725e-15	4.71869e-15	1.70133e-16	2.42589e-15	-5.45672e-15	4.31697e-15
		4.01	-4.19014e-15	2.71697e-15	2.65347e-17	4.24878e-15	4.33561e-15	2.05233e-15
		4.03	-1.13817e-15	5.60252e-15	1.39431e-15	4.49653e-15	-3.07879e-16	2.99655e-15
		4.05	-9.15387e-15	5.54674e-15	1.27875e-16	2.23378e-15	8.39987e-16	4.78736e-15
		4.07	-8.75758e-15	5.54087e-15	-2.61295e-15	1.56426e-15	2.41379e-16	4.26634e-15
		4.09	-6.12956e-16	1.80686e-15	-3.59368e-15	9.4968e-16	3.71741e-15	5.22179e-15
		4.11	-2.28954e-15	3.81181e-15	-1.57343e-15	2.15662e-15	-2.54713e-15	1.39431e-15
		4.13	-3.11448e-15	3.63345e-15	-2.85596e-15	1.93697e-15	-3.26144e-15	4.01221e-15
		4.15	1.35547e-15	1.82309e-15	-3.24789e-16	1.81071e-15	-7.10579e-15	3.28148e-15
		4.17	-2.62944e-16	3.06074e-15	2.10307e-15	1.585e-15	-4.92566e-15	2.93174e-15
		4.19	-1.55323e-15	6.98806e-16	1.40756e-15	1.69938e-15	-5.45845e-15	4.7929e-15
		4.21	-5.10992e-15	3.01704e-15	9.5147e-16	2.99896e-15	-2.29432e-15	1.77445e-15
		4.23	9.93318e-16	2.2465e-15	-9.23806e-16	4.11071e-15	-3.97677e-15	4.94305e-15
		4.25	-6.02762e-15	3.38502e-15	-3.67143e-15	7.05158e-16	3.76127e-16	4.12373e-15
		4.27	-3.83213e-15	3.52512e-15	-2.52426e-15	5.8374e-15	3.55875e-15	2.51202e-15
		4.29	-2.61383e-15	1.10129e-15	-7.31471e-16	3.06193e-15	-8.62361e-15	5.72012e-15
		4.31	-6.66274e-15	4.91851e-15	-2.97096e-15	1.9442e-15	1.39174e-15	2.70696e-15
		4.33	1.43243e-15	3.10567e-15	-7.48162e-16	3.15095e-15	1.54343e-15	3.86904e-15
		4.35	2.28269e-15	2.7043e-15	-6.73272e-15	2.5302e-15	1.26123e-15	1.67664e-15
		4.37	-2.90724e-15	2.4333e-15	1.74947e-17	2.29327e-15	1.38696e-15	3.32692e-15
		4.39	-3.87522e-15	3.01924e-15	1.62171e-15	1.69884e-15	2.47961e-15	5.57236e-15
		4.41	-2.77436e-15	1.25766e-15	6.5883e-16	9.83248e-16	-4.01465e-15	4.66321e-15
		4.43	9.63247e-16	4.12749e-15	-4.68066e-15	1.6708e-15	-2.43382e-15	2.74399e-15
		4.45	7.64822e-16	4.12933e-15	-3.96451e-15	1.78335e-15	4.95979e-15	5.51518e-15
		4.47	3.31639e-15	2.21361e-15	5.66e-17	3.41369e-15	-7.97171e-15	3.45502e-15
		4.49	2.88394e-15	4.33818e-15	1.0172e-16	3.41955e-15	-2.96131e-15	7.94049e-15
		4.51	1.72765e-15	4.44496e-15	-1.61318e-15	2.58748e-15	4.54696e-15	3.28287e-15
		4.53	3.92487e-15	5.54176e-15	1.22851e-15	2.61684e-15	9.48844e-15	3.33515e-15
		4.55	-2.82659e-15	3.27516e-15	-1.92899e-15	1.32556e-15	4.3667e-15	3.16282e-15
		4.57	8.85688e-16	2.1314e-15	9.25786e-16	1.57042e-15	9.27854e-16	3.18332e-15
		4.59	2.6358e-15	5.27002e-15	2.80916e-16	1.98819e-15	-4.03421e-16	5.00484e-15
		4.61	-9.2401e-16	1.59977e-15	2.81356e-15	3.08057e-15	4.02708e-15	3.70829e-15
		4.63	-4.75492e-15	3.17196e-15	2.30062e-15	2.36918e-15	-4.95798e-16	2.56238e-15
		4.65	-6.49327e-15	5.23797e-15	2.01672e-15	3.39268e-15	2.68801e-15	4.27019e-15
		4.67	-8.89297e-16	1.76795e-15	-1.83676e-15	2.62229e-15	3.50663e-15	6.43532e-15
		4.69	-1.22122e-15	6.66289e-15	-1.48242e-15	2.54888e-15	4.83285e-15	7.56153e-15
		4.71	-1.98784e-15	3.87217e-15	-2.59318e-15	2.80751e-15	4.44499e-15	4.82853e-15
		4.73	-5.00676e-15	2.01308e-15	3.03673e-15	2.89277e-15	-6.75864e-15	6.18068e-15
		4.75	4.51333e-15	4.72596e-15	-2.01873e-15	1.01026e-15	-1.15202e-15	3.42637e-15
		4.77	6.51462e-16	1.63648e-15	6.70195e-16	2.12097e-15	-3.66603e-15	1.8082e-15
		4.79	-2.07879e-15	2.54905e-15	4.33085e-15	3.76966e-15	-7.49345e-15	4.16151e-15
		4.81	-4.67807e-15	1.86462e-15	-1.54154e-15	4.0995e-15	-4.44653e-15	5.05722e-15
		4.83	-5.7746e-15	2.36678e-15	8.3207e-15	2.68354e-15	4.59691e-15	5.37545e-15
		4.85	7.26361e-17	2.87431e-15	2.99487e-15	2.73695e-15	2.36203e-15	3.9248e-15
		4.87	-2.89063e-15	1.93817e-15	1.813e-15	1.08259e-15	-2.29631e-15	3.0385e-15
		4.89	-5.37323e-15	5.06467e-15	-6.30824e-15	2.56341e-15	3.91545e-15	4.28762e-15
		4.91	3.33609e-15	6.7703e-15	-1.61962e-15	3.56453e-15	8.77977e-17	3.26213e-15
		4.93	-1.67162e-16	4.03269e-15	8.60744e-15	2.22215e-15	-6.01918e-15	5.41662e-15
		4.95	3.20407e-15	4.38379e-15	5.65781e-16	6.28072e-15	5.09646e-15	6.26655e-15
		4.97	-1.87996e-15	6.6038e-15	8.48331e-15	1.57118e-15	2.92874e-15	5.74756e-15
		4.99	-2.33042e-15	4.17088e-15	4.32204e-15	1.62577e-15	2.34996e-15	3.10856e-15
		5.01
		5.03
		5.05
		5.07
		5.09
		5.11
		5.13
		5.15
		5.17
		5.19
		5.21
		5.23
		5.25
		5.27
		5.29
		5.31
		5.33
		5.35
		5.37
		5.39
		5.41
		5.43
		5.45	3.09164e-13	3.19223e-14	3.1184e-13	4.62187e-14	2.56493e-13	3.76677e-14
		5.47	3.10767e-13	2.86935e-14	2.99539e-13	4.44806e-14	2.58264e-13	3.25201e-14
		5.49	3.05519e-13	3.00681e-14	2.98258e-13	4.27613e-14	2.47296e-13	3.46257e-14
		5.51	3.07998e-13	2.31768e-14	2.9509e-13	3.97807e-14	2.51379e-13	3.49779e-14
		5.53	3.01838e-13	3.00312e-14	2.91485e-13	3.98181e-14	2.48091e-13	3.15773e-14
		5.55	3.05508e-13	2.64642e-14	2.88754e-13	3.67699e-14	2.52166e-13	3.52425e-14
		5.57	2.9698e-13	2.86133e-14	2.91165e-13	3.45499e-14	2.48186e-13	3.40775e-14
		5.59	3.01608e-13	2.79295e-14	2.83697e-13	3.63952e-14	2.43933e-13	3.50106e-14
		5.61	2.96244e-13	2.85487e-14	2.86113e-13	3.83141e-14	2.43782e-13	3.13683e-14
		5.63	2.9697e-13	2.86143e-14	2.8112e-13	3.63603e-14	2.47622e-13	3.28024e-14
		5.65	3.0217e-13	2.4551e-14	2.81142e-13	3.58843e-14	2.42315e-13	3.52446e-14
		5.67	2.98296e-13	2.85228e-14	2.81723e-13	3.55559e-14	2.48924e-13	3.76725e-14
		5.69	3.01217e-13	2.62825e-14	2.80605e-13	3.27686e-14	2.40442e-13	3.36973e-14
		5.71	2.97734e-13	2.51687e-14	2.77304e-13	3.46972e-14	2.446e-13	3.42095e-14
		5.73	2.97021e-13	2.80304e-14	2.84641e-13	3.18554e-14	2.43907e-13	3.37573e-14
		5.75	2.95841e-13	2.71458e-14	2.76032e-13	3.53338e-14	2.4566e-13	3.95346e-14
		5.77	2.96107e-13	2.71345e-14	2.77416e-13	3.09123e-14	2.46136e-13	3.67111e-14
		5.79	2.94633e-13	2.6729e-14	2.81773e-13	3.14614e-14	2.3929e-13	3.36524e-14
		5.81	2.9542e-13	2.84325e-14	2.78014e-13	3.41071e-14	2.42967e-13	3.44452e-14
		5.83	3.03068e-13	2.32417e-14	2.73386e-13	3.49834e-14	2.49609e-13	3.57704e-14
		5.85	2.96633e-13	2.5421e-14	2.73744e-13	3.30207e-14	2.41688e-13	3.62707e-14
		5.87	3.02719e-13	2.39445e-14	2.76046e-13	3.26817e-14	2.4292e-13	3.31899e-14
		5.89	2.88608e-13	2.91765e-14	2.75169e-13	3.07588e-14	2.43622e-13	3.60907e-14
		5.91	2.93662e-13	2.63441e-14	2.76904e-13	3.2375e-14	2.3923e-13	3.34057e-14
		5.93	2.94577e-13	2.32496e-14	2.74328e-13	2.97002e-14	2.40453e-13	3.38917e-14
		5.95	2.95849e-13	2.33822e-14	2.73189e-13	3.12156e-14	2.42121e-13	3.34141e-14
		5.97	2.94744e-13	2.46199e-14	2.70611e-13	3.41384e-14	2.42836e-13	3.42343e-14
		5.99	2.98927e-13	2.47789e-14	2.70631e-13	2.975e-14	2.34827e-13	3.37507e-14
		6.01	2.90436e-13	2.55043e-14	2.67907e-13	3.40388e-14	2.35653e-13	3.60526e-14
		6.03	2.87083e-13	2.39898e-14	2.67403e-13	3.39992e-14	2.41342e-13	3.70023e-14
		6.05	2.84225e-13	2.65324e-14	2.69453e-13	2.99481e-14	2.4208e-13	3.58828e-14
		6.07	2.89787e-13	2.43257e-14	2.7114e-13	3.17557e-14	2.3983e-13	3.72722e-14
		6.09	2.90714e-13	2.55203e-14	2.73386e-13	3.1104e-14	2.42959e-13	3.33461e-14
		6.11	2.82919e-13	2.43345e-14	2.71333e-13	3.13732e-14	2.38606e-13	3.52808e-14
		6.13	2.83942e-13	2.48535e-14	2.63833e-13	3.13671e-14	2.39267e-13	3.55762e-14
		6.15	2.88795e-13	2.51585e-14	2.66777e-13	3.20831e-14	2.34811e-13	3.95142e-14
		6.17	2.84638e-13	2.5943e-14	2.67879e-13	3.16839e-14	2.4002e-13	3.78203e-14
		6.19	2.81953e-13	2.10792e-14	2.66028e-13	3.00607e-14	2.35534e-13	3.13577e-14
		6.21	2.85896e-13	2.42831e-14	2.63119e-13	3.26287e-14	2.39564e-13	3.38352e-14
		6.23	2.82398e-13	2.47958e-14	2.68946e-13	3.23323e-14	2.38734e-13	3.6826e-14
		6.25	2.88447e-13	2.33805e-14	2.67372e-13	3.31636e-14	2.4209e-13	4.00392e-14
		6.27	2.86722e-13	2.41639e-14	2.64245e-13	3.26787e-14	2.38943e-13	3.62944e-14
		6.29	2.85218e-13	2.28651e-14	2.62229e-13	3.17079e-14	2.41799e-13	3.56884e-14
		6.31	2.80105e-13	2.3251e-14	2.66004e-13	3.16209e-14	2.39896e-13	3.6381e-14
		6.33	2.84226e-13	2.53206e-14	2.6693e-13	3.00083e-14	2.41147e-13	3.97742e-14
		6.35	2.82883e-13	2.41235e-14	2.6624e-13	3.01312e-14	2.39062e-13	3.38366e-14
		6.37	2.81766e-13	2.39043e-14	2.63438e-13	3.17475e-14	2.32593e-13	3.75965e-14
		6.39	2.78445e-13	2.6334e-14	2.63066e-13	2.77083e-14	2.36653e-13	3.64926e-14
		6.41	2.76853e-13	2.09304e-14	2.65474e-13	3.04459e-14	2.39062e-13	3.38615e-14
		6.43	2.81127e-13	2.58407e-14	2.56597e-13	3.07249e-14	2.32872e-13	3.9076e-14
		6.45	2.80479e-13	2.68717e-14	2.58658e-13	3.09187e-14	2.34081e-13	3.80273e-14
		6.47	2.84279e-13	2.42701e-14	2.64459e-13	3.1714e-14	2.37077e-13	3.54135e-14
		6.49	2.82822e-13	2.37551e-14	2.62793e-13	2.94796e-14	2.48575e-13	4.06793e-14
		6.51	2.77533e-13	2.46724e-14	2.617e-13	2.92802e-14	2.29131e-13	3.37343e-14
		6.53	2.78146e-13	2.18261e-14	2.61188e-13	2.96831e-14	2.35954e-13	3.81251e-14
		6.55	2.77456e-13	2.69063e-14	2.63164e-13	3.15441e-14	2.34077e-13	3.52228e-14
		6.57	2.77057e-13	2.46298e-14	2.65656e-13	2.93641e-14	2.36006e-13	3.40351e-14
		6.59	2.74046e-13	2.37156e-14	2.58053e-13	2.86946e-14	2.33951e-13	3.40759e-14
		6.61	2.78391e-13	1.99631e-14	2.56905e-13	2.9643e-14	2.37254e-13	3.47649e-14
		6.63	2.6957e-13	2.56509e-14	2.55261e-13	2.63175e-14	2.32145e-13	3.45726e-14
		6.65	2.72484e-13	2.26467e-14	2.56232e-13	2.98517e-14	2.36628e-13	3.40987e-14
		6.67	2.76999e-13	2.17065e-14	2.60647e-13	2.73391e-14	2.37529e-13	3.32117e-14
		6.69	2.74119e-13	2.07547e-14	2.58856e-13	2.6774e-14	2.35406e-13	3.53627e-14
		6.71	2.6979e-13	2.11961e-14	2.58882e-13	2.9334e-14	2.32764e-13	3.48586e-14
		6.73	2.75539e-13	1.88752e-14	2.57114e-13	2.90314e-14	2.42641e-13	3.61897e-14
		6.75	2.68984e-13	2.34451e-14	2.54782e-13	2.90615e-14	2.37421e-13	3.92594e-14
		6.77	2.69382e-13	2.09956e-14	2.60661e-13	2.67686e-14	2.38808e-13	3.46296e-14
		6.79	2.68118e-13	1.97992e-14	2.60402e-13	2.77772e-14	2.32838e-13	3.45236e-14
		6.81	2.71589e-13	2.06942e-14	2.51736e-13	2.89789e-14	2.38175e-13	4.02446e-14
		6.83	2.71468e-13	1.96557e-14	2.52383e-13	2.57533e-14	2.3945e-13	3.73664e-14
		6.85	2.73713e-13	2.06821e-14	2.58217e-13	2.7694e-14	2.41087e-13	4.10855e-14
		6.87	2.69005e-13	2.07137e-14	2.54156e-13	2.92761e-14	2.32761e-13	3.70014e-14
		6.89	2.66746e-13	2.12285e-14	2.53136e-13	2.68129e-14	2.41073e-13	3.73027e-14
		6.91	2.71727e-13	2.36216e-14	2.55269e-13	2.74841e-14	2.31385e-13	3.94287e-14
		6.93	2.6147e-13	2.12409e-14	2.52231e-13	2.75124e-14	2.37491e-13	3.78484e-14
		6.95	2.56439e-13	2.44025e-14	2.53466e-13	2.96967e-14	2.31128e-13	3.95441e-14
		6.97	2.6276e-13	2.10109e-14	2.48692e-13	2.73459e-14	2.38383e-13	3.8562e-14
		6.99	2.6855e-13	1.89033e-14	2.5348e-13	2.90391e-14	2.3332e-13	4.20635e-14
		7.01	2.6502e-13	1.89379e-14	2.54309e-13	2.89137e-14	2.26073e-13	3.94988e-14
		7.03	2.63152e-13	2.0764e-14	2.4943e-13	2.80958e-14	2.36572e-13	3.6262e-14
		7.05	2.64835e-13	2.41009e-14	2.51143e-13	2.66786e-14	2.35746e-13	3.77174e-14
		7.07	2.64708e-13	2.33444e-14	2.50822e-13	2.76676e-14	2.36046e-13	3.83685e-14
		7.09	2.57712e-13	2.10407e-14	2.49254e-13	2.73592e-14	2.41e-13	3.99773e-14
		7.11	2.56719e-13	2.20923e-14	2.52355e-13	2.81897e-14	2.32277e-13	3.66587e-14
		7.13	2.64682e-13	2.24645e-14	2.46176e-13	2.61172e-14	2.33352e-13	3.72983e-14
		7.15	2.58616e-13	2.06165e-14	2.49526e-13	2.83216e-14	2.31651e-13	3.84468e-14
		7.17	2.55299e-13	2.07554e-14	2.50676e-13	2.92526e-14	2.30349e-13	3.71695e-14
		7.19	2.58928e-13	2.06e-14	2.46732e-13	2.70393e-14	2.28546e-13	3.95238e-14
		7.21	2.59192e-13	2.14521e-14	2.49717e-13	2.67616e-14	2.21507e-13	3.53437e-14
		7.23	2.60531e-13	2.0113e-14	2.50752e-13	2.90557e-14	2.25295e-13	3.31228e-14
		7.25	2.58941e-13	1.94159e-14	2.488e-13	2.81206e-14	2.2599e-13	3.37124e-14
		7.27	2.60708e-13	1.83691e-14	2.48934e-13	2.77059e-14	2.28124e-13	3.44146e-14
		7.29	2.51204e-13	2.0252e-14	2.47202e-13	2.79811e-14	2.33617e-13	3.51983e-14
		7.31	2.52918e-13	2.3383e-14	2.41856e-13	3.05805e-14	2.3003e-13	3.51345e-14
		7.33	2.53489e-13	2.15401e-14	2.43339e-13	2.69878e-14	2.32244e-13	3.14546e-14
		7.35	2.59169e-13	2.0377e-14	2.42796e-13	2.69221e-14	2.25924e-13	3.16311e-14
		7.37	2.53329e-13	1.81595e-14	2.43593e-13	2.82113e-14	2.1537e-13	4.08308e-14
		7.39	2.51033e-13	2.1857e-14	2.46333e-13	2.76468e-14	2.15203e-13	3.9448e-14
		7.41	2.52882e-13	1.84919e-14	2.45241e-13	3.03734e-14	2.16416e-13	3.83827e-14
		7.43	2.51279e-13	2.01137e-14	2.44417e-13	2.62223e-14	2.35721e-13	3.5587e-14
		7.45	2.49139e-13	2.14883e-14	2.46077e-13	2.82715e-14	2.2957e-13	3.38868e-14
		7.47	2.48058e-13	2.26456e-14	2.46837e-13	2.36165e-14	2.3378e-13	3.22837e-14
		7.49	2.47202e-13	1.88226e-14	2.44016e-13	2.85672e-14	2.34413e-13	3.07134e-14
		7.51	2.4879e-13	1.77862e-14	2.40847e-13	2.99632e-14	2.27455e-13	3.11385e-14
		7.53	2.4835e-13	1.99763e-14	2.38519e-13	2.68595e-14	2.23692e-13	3.49765e-14
		7.55	2.48327e-13	1.86874e-14	2.41545e-13	2.78613e-14	2.19499e-13	3.72378e-14
		7.57	2.46213e-13	1.80527e-14	2.38491e-13	3.11198e-14	2.19729e-13	3.93282e-14
		7.59	2.48291e-13	1.76495e-14	2.39747e-13	2.88279e-14	2.19667e-13	3.96211e-14
		7.61	2.40205e-13	2.00677e-14	2.41757e-13	2.60441e-14	2.25373e-13	3.26754e-14
		7.63	2.36494e-13	1.99261e-14	2.38915e-13	2.9165e-14	2.34852e-13	3.2057e-14
		7.65	2.42878e-13	1.82574e-14	2.41083e-13	2.87122e-14	2.28854e-13	3.10862e-14
		7.67	2.42012e-13	1.83073e-14	2.41585e-13	2.85096e-14	2.29963e-13	3.08951e-14
		7.69	2.45038e-13	1.67847e-14	2.38112e-13	2.61939e-14	2.35129e-13	3.28671e-14
		7.71	2.4079e-13	1.78046e-14	2.35379e-13	2.82188e-14	2.32901e-13	3.19676e-14
		7.73	2.42477e-13	1.94539e-14	2.39018e-13	2.78063e-14	2.2504e-13	3.04393e-14
		7.75	2.37681e-13	1.69327e-14	2.36781e-13	2.75072e-14	2.33039e-13	3.07817e-14
		7.77	2.36489e-13	1.82219e-14	2.41594e-13	2.8735e-14	2.26963e-13	3.41235e-14
		7.79	2.4374e-13	1.36455e-14	2.37747e-13	2.72956e-14	2.29516e-13	3.32195e-14
		7.81	2.48163e-13	1.33903e-14	2.34597e-13	2.7383e-14	2.23086e-13	3.10596e-14
		7.83	2.47307e-13	1.58864e-14	2.37293e-13	2.67643e-14	2.30042e-13	3.2695e-14
		7.85	2.44832e-13	1.38581e-14	2.34596e-13	2.5166e-14	2.28378e-13	2.98379e-14
		7.87	2.39496e-13	1.51158e-14	2.43058e-13	2.77307e-14	2.33842e-13	3.18082e-14
		7.89	2.38156e-13	1.07498e-14	2.36866e-13	2.75259e-14	2.25662e-13	3.30016e-14
		7.91	2.41282e-13	1.28723e-14	2.39036e-13	2.6934e-14	2.22312e-13	3.01047e-14
		7.93	2.4412e-13	1.19421e-14	2.31053e-13	2.37681e-14	2.2567e-13	2.90835e-14
		7.95	2.39073e-13	1.40524e-14	2.35914e-13	2.68813e-14	2.20069e-13	3.20448e-14
		7.97	2.43415e-13	1.14272e-14	2.35603e-13	2.67899e-14	2.26685e-13	3.17722e-14
		7.99	2.41499e-13	1.25091e-14	2.4144e-13	2.77498e-14	2.23874e-13	2.91213e-14
		8.01	2.37875e-13	1.33075e-14	2.37487e-13	2.67179e-14	2.23196e-13	2.68391e-14
		8.03	2.40152e-13	1.21914e-14	2.40029e-13	2.78709e-14	2.18999e-13	3.21962e-14
		8.05	2.37703e-13	1.20529e-14	2.36027e-13	2.73322e-14	2.23546e-13	3.18002e-14
		8.07	2.38162e-13	1.42603e-14	2.3428e-13	2.70197e-14	2.29522e-13	3.08313e-14
		8.09	2.36994e-13	1.62047e-14	2.36019e-13	2.71735e-14	2.26256e-13	2.93414e-14
		8.11	2.36796e-13	1.21705e-14	2.32724e-13	2.89118e-14	2.1741e-13	3.4486e-14
		8.13	2.33879e-13	1.3282e-14	2.33892e-13	2.66745e-14	2.29978e-13	3.14727e-14
		8.15	2.32695e-13	1.18864e-14	2.3429e-13	2.45536e-14	2.25454e-13	2.65822e-14
		8.17	2.32566e-13	1.15324e-14	2.3702e-13	2.72145e-14	2.20006e-13	2.7123e-14
		8.19	2.28672e-13	1.5022e-14	2.32442e-13	2.7202e-14	2.34783e-13	3.06549e-14
		8.21	2.34197e-13	1.34042e-14	2.34117e-13	2.88414e-14	2.25678e-13	3.03327e-14
		8.23	2.35159e-13	1.14772e-14	2.36972e-13	2.63352e-14	2.24663e-13	2.85368e-14
		8.25	2.39988e-13	1.15328e-14	2.3798e-13	2.93847e-14	2.23261e-13	2.92429e-14
		8.27	2.28582e-13	1.36725e-14	2.32881e-13	2.85944e-14	2.23391e-13	2.58061e-14
		8.29	2.33852e-13	1.31804e-14	2.32198e-13	2.56677e-14	2.18167e-13	2.85142e-14
		8.31	2.31672e-13	1.28917e-14	2.38835e-13	2.50473e-14	2.19196e-13	2.9378e-14
		8.33	2.31626e-13	1.23115e-14	2.37011e-13	2.65391e-14	2.17742e-13	2.94929e-14
		8.35	2.29587e-13	1.50361e-14	2.32853e-13	2.62575e-14	2.20118e-13	2.86767e-14
		8.37	2.24981e-13	1.47773e-14	2.26932e-13	2.6001e-14	2.17067e-13	3.17283e-14
		8.39	2.28512e-13	1.27578e-14	2.3309e-13	2.51587e-14	2.27379e-13	2.94154e-14
		8.41	2.29624e-13	1.5173e-14	2.3041e-13	2.54109e-14	2.19129e-13	2.86018e-14
		8.43	2.23589e-13	1.53187e-14	2.31368e-13	2.5931e-14	2.29386e-13	2.63051e-14
		8.45	2.21924e-13	1.53952e-14	2.34329e-13	2.56616e-14	2.16326e-13	3.13579e-14
		8.47	2.28809e-13	1.05758e-14	2.32963e-13	2.71498e-14	2.23293e-13	2.81369e-14
		8.49	2.22673e-13	1.64269e-14	2.33235e-13	2.81217e-14	2.18944e-13	2.60608e-14
		8.51	2.17814e-13	1.62648e-14	2.35905e-13	2.86818e-14	2.14358e-13	2.92166e-14
		8.53	2.12988e-13	1.63302e-14	2.30015e-13	2.68517e-14	2.19941e-13	2.89923e-14
		8.55	2.13051e-13	1.72037e-14	2.28491e-13	2.7993e-14	2.19069e-13	2.91637e-14
		8.57	2.20187e-13	1.36047e-14	2.30937e-13	2.80903e-14	2.20565e-13	2.97411e-14
		8.59	2.15527e-13	1.30591e-14	2.34955e-13	2.72723e-14	2.2023e-13	2.7041e-14
		8.61	2.18731e-13	1.44146e-14	2.31666e-13	2.82919e-14	2.18374e-13	2.91079e-14
		8.63	2.15691e-13	1.44916e-14	2.32852e-13	2.76359e-14	2.16758e-13	2.89034e-14
		8.65	2.15199e-13	1.6475e-14	2.29919e-13	2.81464e-14	2.18808e-13	3.05718e-14
		8.67	2.17192e-13	1.33888e-14	2.36756e-13	2.72568e-14	2.2095e-13	2.8372e-14
		8.69	2.14838e-13	1.67994e-14	2.33668e-13	2.71414e-14	2.15837e-13	3.01078e-14
		8.71	2.0477e-13	1.77382e-14	2.25282e-13	2.66789e-14	2.20598e-13	2.71176e-14
		8.73	2.15705e-13	1.16816e-14	2.29693e-13	2.74715e-14	2.12918e-13	2.97676e-14
		8.75	2.14191e-13	1.31676e-14	2.27647e-13	2.79478e-14	2.15876e-13	2.85824e-14
		8.77	2.09356e-13	1.28195e-14	2.22772e-13	2.57673e-14	2.15606e-13	2.6976e-14
		8.79	2.08924e-13	1.29655e-14	2.30119e-13	2.44472e-14	2.09692e-13	2.82667e-14
		8.81	2.14368e-13	1.00689e-14	2.31771e-13	2.80475e-14	2.07942e-13	2.84527e-14
		8.83	2.10957e-13	1.277e-14	2.30058e-13	2.60489e-14	2.12351e-13	2.77973e-14
		8.85	2.09635e-13	1.31524e-14	2.29298e-13	2.749e-14	2.09481e-13	2.73452e-14
		8.87	2.07664e-13	1.23875e-14	2.19628e-13	2.67032e-14	2.1399e-13	2.90968e-14
		8.89	2.10791e-13	1.30237e-14	2.26147e-13	2.56535e-14	2.13256e-13	2.81867e-14
		8.91	2.14053e-13	1.3171e-14	2.27238e-13	2.88537e-14	2.10237e-13	2.70991e-14
		8.93	2.11826e-13	1.3673e-14	2.26807e-13	2.78359e-14	2.08292e-13	2.88288e-14
		8.95	2.08797e-13	1.29898e-14	2.25951e-13	2.75001e-14	2.10669e-13	2.60728e-14
		8.97	2.10395e-13	1.36731e-14	2.26961e-13	2.88422e-14	2.1381e-13	3.06125e-14
		8.99	1.96879e-13	1.54471e-14	2.1861e-13	2.85582e-14	2.11349e-13	3.00149e-14
		9.01	1.9937e-13	1.48276e-14	2.26644e-13	2.84477e-14	2.11112e-13	2.73473e-14
		9.03	2.02981e-13	1.24073e-14	2.22896e-13	2.80625e-14	2.10501e-13	2.74016e-14
		9.05	2.03341e-13	1.4009e-14	2.29906e-13	2.50819e-14	2.09127e-13	3.09774e-14
		9.07	2.03118e-13	1.20186e-14	2.24454e-13	2.68626e-14	2.18898e-13	2.94417e-14
		9.09	1.95111e-13	1.20729e-14	2.28103e-13	2.55788e-14	2.11441e-13	2.66306e-14
		9.11	1.9377e-13	1.17746e-14	2.24096e-13	2.75596e-14	2.12286e-13	3.08247e-14
		9.13	2.01692e-13	1.18305e-14	2.28366e-13	2.57488e-14	2.15548e-13	3.20091e-14
		9.15	1.9771e-13	1.27949e-14	2.28327e-13	2.50978e-14	2.16152e-13	2.85733e-14
		9.17	1.95193e-13	1.32437e-14	2.24568e-13	2.58867e-14	2.06852e-13	2.85459e-14
		9.19	1.96669e-13	1.32591e-14	2.26172e-13	2.69748e-14	2.09126e-13	2.67624e-14
		9.21	1.92244e-13	1.41411e-14	2.21478e-13	2.72712e-14	2.10307e-13	3.2651e-14
		9.23	2.04316e-13	9.14866e-15	2.21736e-13	2.72279e-14	2.11055e-13	3.06351e-14
		9.25	1.91086e-13	1.23394e-14	2.2728e-13	2.63702e-14	2.07833e-13	2.99344e-14
		9.27	1.97323e-13	1.41965e-14	2.2035e-13	2.47321e-14	2.08675e-13	2.92398e-14
		9.29	1.94989e-13	1.32888e-14	2.21382e-13	2.73045e-14	2.07354e-13	2.80669e-14
		9.31	1.89652e-13	1.5662e-14	2.24381e-13	2.76727e-14	2.09906e-13	2.63221e-14
		9.33	1.9818e-13	1.10881e-14	2.27115e-13	2.44904e-14	2.14276e-13	2.78798e-14
		9.35	1.94529e-13	1.32019e-14	2.24902e-13	2.75174e-14	2.07102e-13	2.69895e-14
		9.37	1.89142e-13	1.32368e-14	2.22241e-13	2.41835e-14	2.07998e-13	2.78713e-14
		9.39	1.91679e-13	1.29972e-14	2.29541e-13	2.44781e-14	2.08761e-13	2.53159e-14
		9.41	1.8968e-13	1.31491e-14	2.18173e-13	2.55228e-14	2.07364e-13	2.69727e-14
		9.43	1.88282e-13	1.33135e-14	2.22943e-13	2.59652e-14	2.11736e-13	3.09342e-14
		9.45	1.86801e-13	1.60691e-14	2.22103e-13	2.39671e-14	2.11338e-13	2.82755e-14
		9.47	1.88292e-13	1.24865e-14	2.27211e-13	2.77855e-14	2.03719e-13	2.58864e-14
		9.49	1.92843e-13	1.34661e-14	2.20459e-13	2.59501e-14	2.06018e-13	2.98342e-14
		9.51	1.90956e-13	1.52013e-14	2.22291e-13	2.51228e-14	2.0075e-13	2.5251e-14
		9.53	1.88036e-13	1.45121e-14	2.23494e-13	2.58838e-14	2.01859e-13	2.94948e-14
		9.55	1.79074e-13	1.5187e-14	2.20591e-13	2.42852e-14	2.03399e-13	2.50364e-14
		9.57	1.79705e-13	1.32129e-14	2.22528e-13	2.59196e-14	2.08239e-13	2.79881e-14
		9.59	1.87126e-13	1.47725e-14	2.28834e-13	2.72659e-14	2.03924e-13	2.7733e-14
		9.61	1.8498e-13	1.46498e-14	2.24528e-13	2.48775e-14	2.06603e-13	2.35982e-14
		9.63	1.8618e-13	1.44068e-14	2.25883e-13	2.24262e-14	2.07545e-13	2.50724e-14
		9.65	1.81071e-13	1.58262e-14	2.25577e-13	2.41177e-14	2.05696e-13	3.18273e-14
		9.67	1.81571e-13	1.26887e-14	2.25131e-13	2.43764e-14	1.97856e-13	2.75782e-14
		9.69	1.8127e-13	1.58427e-14	2.26552e-13	2.60182e-14	2.07779e-13	2.75527e-14
		9.71	1.77566e-13	1.40818e-14	2.20432e-13	2.49821e-14	1.98144e-13	2.84153e-14
		9.73	1.77219e-13	1.30869e-14	2.23737e-13	2.34635e-14	2.08914e-13	2.45102e-14
		9.75	1.77869e-13	1.39121e-14	2.25303e-13	2.56275e-14	2.01799e-13	2.5644e-14
		9.77	1.82516e-13	1.36583e-14	2.25642e-13	2.36037e-14	2.05661e-13	2.29299e-14
		9.79	1.80322e-13	1.23391e-14	2.27329e-13	2.47678e-14	2.04336e-13	2.42493e-14
		9.81	1.76404e-13	1.3216e-14	2.22286e-13	2.3862e-14	2.08933e-13	2.9497e-14
		9.83	1.79041e-13	1.39238e-14	2.25304e-13	2.33996e-14	2.02977e-13	2.53862e-14
		9.85	1.7554e-13	1.27196e-14	2.22477e-13	2.44239e-14	2.07004e-13	2.40183e-14
		9.87	1.7785e-13	1.15495e-14	2.24345e-13	2.4784e-14	2.06207e-13	2.63475e-14
		9.89	1.74195e-13	1.2699e-14	2.19542e-13	2.4539e-14	2.09396e-13	2.585e-14
		9.91	1.77197e-13	1.21254e-14	2.20295e-13	2.53125e-14	2.10015e-13	2.3643e-14
		9.93	1.78796e-13	1.14959e-14	2.28197e-13	2.53513e-14	2.03365e-13	2.21554e-14
		9.95	1.71931e-13	1.41555e-14	2.22956e-13	2.45425e-14	2.02422e-13	2.66879e-14
		9.97	1.80093e-13	1.39021e-14	2.18398e-13	2.48515e-14	2.03174e-13	2.66508e-14
		9.99	1.73363e-13	1.53531e-14	2.21103e-13	2.51712e-14	2.01385e-13	2.25463e-14
		10.01	1.80678e-13	1.26824e-14	2.20849e-13	2.52508e-14	1.96064e-13	2.56957e-14
		10.03	1.73873e-13	1.58271e-14	2.16627e-13	2.57925e-14	2.00442e-13	2.68967e-14
		10.05	1.81099e-13	1.20529e-14	2.26146e-13	2.35315e-14	1.95374e-13	2.86903e-14
		10.07	1.74319e-13	1.46722e-14	2.25528e-13	2.54219e-14	2.06199e-13	2.34197e-14
		10.09	1.76017e-13	1.27371e-14	2.25276e-13	2.2203e-14	1.97241e-13	2.60863e-14
		10.11	1.69178e-13	1.50832e-14	2.24972e-13	2.28955e-14	1.99911e-13	2.66699e-14
		10.13	1.77403e-13	1.5342e-14	2.23412e-13	2.34783e-14	2.06091e-13	2.63539e-14
		10.15	1.68992e-13	1.44021e-14	2.27308e-13	2.53589e-14	2.00713e-13	2.36337e-14
		10.17	1.67842e-13	1.39508e-14	2.23034e-13	2.591e-14	1.97801e-13	2.60814e-14
		10.19	1.74426e-13	1.03735e-14	2.21963e-13	2.41659e-14	2.00557e-13	2.66854e-14
		10.21	1.75013e-13	1.21997e-14	2.1893e-13	2.67021e-14	2.01688e-13	2.63286e-14
		10.23	1.7235e-13	1.52802e-14	2.2175e-13	2.58358e-14	1.97063e-13	2.53717e-14
		10.25	1.64698e-13	1.69072e-14	2.19364e-13	2.42412e-14	1.99844e-13	2.52217e-14
		10.27	1.77368e-13	1.3457e-14	2.16765e-13	2.55955e-14	1.95638e-13	2.7882e-14
		10.29	1.67695e-13	1.30189e-14	2.18729e-13	2.44964e-14	1.94228e-13	2.54783e-14
		10.31	1.70705e-13	1.27685e-14	2.25948e-13	2.54208e-14	1.91669e-13	2.69301e-14
		10.33	1.70323e-13	1.38241e-14	2.27345e-13	2.46308e-14	1.93017e-13	2.63919e-14
		10.35	1.6807e-13	1.46288e-14	2.23361e-13	2.44793e-14	1.90117e-13	2.7136e-14
		10.37	1.69739e-13	1.32892e-14	2.21482e-13	2.35747e-14	2.04568e-13	2.95681e-14
		10.39	1.66439e-13	1.12021e-14	2.29851e-13	2.37388e-14	1.94282e-13	2.09226e-14
		10.41	1.73709e-13	1.1171e-14	2.26639e-13	2.46486e-14	1.95009e-13	2.58277e-14
		10.43	1.6867e-13	1.20236e-14	2.23792e-13	2.63626e-14	1.97833e-13	2.39348e-14
		10.45	1.65343e-13	1.48289e-14	2.22837e-13	2.32637e-14	2.0238e-13	2.57751e-14
		10.47	1.67123e-13	1.41989e-14	2.27156e-13	2.53942e-14	1.96124e-13	2.48262e-14
		10.49	1.66018e-13	1.14733e-14	2.22716e-13	2.46304e-14	1.97885e-13	2.7421e-14
		10.51	1.60449e-13	1.54881e-14	2.21865e-13	2.48113e-14	1.97411e-13	2.70911e-14
		10.53	1.64164e-13	1.21672e-14	2.28162e-13	2.49272e-14	1.96348e-13	2.34648e-14
		10.55	1.64323e-13	1.26395e-14	2.21357e-13	2.67133e-14	1.94234e-13	3.09445e-14
		10.57	1.62895e-13	1.35895e-14	2.23855e-13	2.51462e-14	1.99337e-13	2.97164e-14
		10.59	1.62833e-13	1.20682e-14	2.25172e-13	2.67651e-14	1.91053e-13	2.41444e-14
		10.61	1.65282e-13	1.35429e-14	2.20624e-13	2.44996e-14	2.00446e-13	2.7193e-14
		10.63	1.57112e-13	1.44047e-14	2.25227e-13	2.58162e-14	1.97452e-13	2.64727e-14
		10.65	1.62068e-13	1.55142e-14	2.21969e-13	2.43539e-14	1.96174e-13	2.59542e-14
		10.67	1.57116e-13	1.45697e-14	2.24993e-13	2.49194e-14	1.94808e-13	2.83891e-14
		10.69	1.58249e-13	1.49508e-14	2.22634e-13	2.29616e-14	1.92137e-13	2.42216e-14
		10.71	1.59833e-13	1.24489e-14	2.21789e-13	2.57056e-14	1.96626e-13	2.37078e-14
		10.73	1.60146e-13	1.33925e-14	2.23187e-13	2.66227e-14	1.99588e-13	2.60404e-14
		10.75	1.60805e-13	1.26575e-14	2.23122e-13	2.5403e-14	1.90786e-13	2.55299e-14
		10.77	1.64101e-13	1.18879e-14	2.22201e-13	2.46713e-14	2.00843e-13	2.41217e-14
		10.79	1.61881e-13	1.03522e-14	2.26682e-13	2.8146e-14	1.94922e-13	2.33752e-14
		10.81	1.72903e-13	1.13924e-14	2.18911e-13	2.57805e-14	1.89622e-13	2.3261e-14
		10.83	1.5751e-13	1.1553e-14	2.2249e-13	2.6753e-14	1.93124e-13	2.63408e-14
		10.85	1.54638e-13	1.1669e-14	2.14917e-13	2.42906e-14	1.85781e-13	2.61894e-14
		10.87	1.64659e-13	1.30131e-14	2.21972e-13	2.65223e-14	1.93547e-13	2.25209e-14
		10.89	1.56969e-13	1.28266e-14	2.16416e-13	2.51477e-14	1.87644e-13	2.11831e-14
		10.91	1.58312e-13	1.52891e-14	2.23725e-13	2.43957e-14	1.92901e-13	2.06342e-14
		10.93	1.5189e-13	1.21163e-14	2.22322e-13	2.66654e-14	1.96792e-13	2.35222e-14
		10.95	1.53795e-13	1.23889e-14	2.17691e-13	2.4801e-14	1.92037e-13	1.98289e-14
		10.97	1.54865e-13	1.26423e-14	2.1686e-13	2.56899e-14	1.92496e-13	2.11061e-14
		10.99	1.56049e-13	1.44201e-14	2.1819e-13	2.58126e-14	1.84936e-13	2.41863e-14
		11.01	1.60238e-13	1.36431e-14	2.1887e-13	2.65802e-14	1.93472e-13	2.47811e-14
		11.03	1.56803e-13	1.39721e-14	2.19214e-13	2.76956e-14	1.90923e-13	2.55072e-14
		11.05	1.56578e-13	1.20568e-14	2.16177e-13	2.58951e-14	1.90599e-13	2.41625e-14
		11.07	1.52556e-13	1.15859e-14	2.22518e-13	2.57216e-14	1.98744e-13	2.74231e-14
		11.09	1.4876e-13	1.37215e-14	2.24385e-13	2.61199e-14	1.87816e-13	2.0594e-14
		11.11	1.5741e-13	1.31344e-14	2.21321e-13	2.41855e-14	1.88442e-13	2.37061e-14
		11.13	1.52788e-13	1.25856e-14	2.19201e-13	2.53408e-14	1.91793e-13	2.3679e-14
		11.15	1.53577e-13	1.25883e-14	2.18703e-13	2.29233e-14	1.84133e-13	2.30046e-14
		11.17	1.44184e-13	1.28236e-14	2.18189e-13	2.35416e-14	1.90351e-13	2.31248e-14
		11.19	1.51064e-13	7.93373e-15	2.19764e-13	2.45348e-14	1.90877e-13	2.46073e-14
		11.21	1.46461e-13	1.31967e-14	2.17796e-13	2.61122e-14	1.90812e-13	2.1414e-14
		11.23	1.51614e-13	1.19788e-14	2.16817e-13	2.65321e-14	1.85857e-13	2.59764e-14
		11.25	1.51938e-13	1.18722e-14	2.18773e-13	2.65513e-14	1.89269e-13	2.40001e-14
		11.27	1.42087e-13	1.13608e-14	2.18512e-13	2.70171e-14	1.88352e-13	2.31195e-14
		11.29	1.41561e-13	1.16011e-14	2.16762e-13	2.24464e-14	1.89003e-13	2.09855e-14
		11.31	1.47787e-13	1.17435e-14	2.16634e-13	2.41113e-14	1.86539e-13	2.57841e-14
		11.33	1.44875e-13	1.0849e-14	2.1478e-13	2.87555e-14	1.80511e-13	2.63904e-14
		11.35	1.46026e-13	1.16387e-14	2.17185e-13	2.50281e-14	1.87677e-13	2.44905e-14
		11.37	1.44398e-13	1.07372e-14	2.19743e-13	2.72067e-14	1.89492e-13	2.30847e-14
		11.39	1.4708e-13	1.09256e-14	2.15621e-13	2.66247e-14	1.86167e-13	2.44906e-14
		11.41	1.4321e-13	1.20752e-14	2.16126e-13	2.37224e-14	1.90295e-13	2.52818e-14
		11.43	1.44897e-13	1.10179e-14	2.17949e-13	2.6603e-14	1.84264e-13	2.03321e-14
		11.45	1.43504e-13	1.03679e-14	2.16149e-13	2.62605e-14	1.78863e-13	1.95434e-14
		11.47	1.41954e-13	1.24393e-14	2.22057e-13	2.53749e-14	1.84002e-13	2.0648e-14
		11.49	1.38328e-13	1.17829e-14	2.18834e-13	2.58829e-14	1.85296e-13	2.48529e-14
		11.51	1.41427e-13	1.10556e-14	2.17201e-13	2.45106e-14	1.86312e-13	2.17027e-14
		11.53	1.37714e-13	1.25314e-14	2.17406e-13	2.82975e-14	1.8768e-13	2.18917e-14
		11.55	1.43916e-13	9.77704e-15	2.22827e-13	2.59479e-14	1.86891e-13	2.28365e-14
		11.57	1.40148e-13	1.31944e-14	2.1603e-13	2.54113e-14	1.94017e-13	2.17425e-14
		11.59	1.33363e-13	1.15318e-14	2.18778e-13	2.49543e-14	1.94479e-13	2.47575e-14
		11.61	1.34769e-13	1.05819e-14	2.19122e-13	2.53357e-14	1.8606e-13	2.07282e-14
		11.63	1.36472e-13	1.24615e-14	2.20272e-13	2.85235e-14	1.97094e-13	2.54794e-14
		11.65	1.37361e-13	1.29539e-14	2.22276e-13	2.35575e-14	1.87987e-13	2.64773e-14
		11.67	1.41451e-13	1.20156e-14	2.1948e-13	2.50779e-14	1.84744e-13	2.43136e-14
		11.69	1.33757e-13	1.39125e-14	2.20693e-13	2.52618e-14	1.87508e-13	2.22373e-14
		11.71	1.36585e-13	1.25101e-14	2.16586e-13	2.5745e-14	1.85545e-13	2.63631e-14
		11.73	1.37419e-13	1.39318e-14	2.16914e-13	2.57991e-14	1.93526e-13	2.66915e-14
		11.75	1.39594e-13	1.04174e-14	2.20393e-13	2.7034e-14	1.86183e-13	2.45755e-14
		11.77	1.39616e-13	1.22708e-14	2.16365e-13	2.56376e-14	1.85673e-13	2.33464e-14
		11.79	1.41999e-13	1.43011e-14	2.15559e-13	2.61881e-14	1.8583e-13	2.39738e-14
		11.81	1.33887e-13	1.3288e-14	2.13499e-13	2.49959e-14	1.87414e-13	2.3364e-14
		11.83	1.36312e-13	1.04304e-14	2.17038e-13	2.57764e-14	1.79782e-13	2.17777e-14
		11.85	1.35257e-13	1.3888e-14	2.13778e-13	2.639e-14	1.89022e-13	2.4684e-14
		11.87	1.37223e-13	1.25482e-14	2.20416e-13	2.71383e-14	1.77252e-13	2.42766e-14
		11.89	1.35833e-13	1.07882e-14	2.09481e-13	2.69333e-14	1.7963e-13	2.4255e-14
		11.91	1.31599e-13	1.40858e-14	2.13918e-13	2.81167e-14	1.79627e-13	2.07752e-14
		11.93	1.39447e-13	1.08702e-14	2.10191e-13	2.75865e-14	1.88831e-13	2.4514e-14
		11.95	1.36064e-13	1.37327e-14	2.12826e-13	2.49527e-14	1.83796e-13	2.06379e-14
		11.97	1.34601e-13	1.32764e-14	2.18252e-13	2.64506e-14	1.8064e-13	2.26706e-14
		11.99	1.28852e-13	1.04708e-14	2.11724e-13	2.78303e-14	1.8669e-13	2.2519e-14
		12.01	1.37227e-13	1.14316e-14	2.1448e-13	2.68429e-14	1.89595e-13	2.39742e-14
		12.03	1.33435e-13	1.172e-14	2.11592e-13	2.82053e-14	1.8412e-13	2.43653e-14
		12.05	1.36477e-13	1.22299e-14	2.11181e-13	2.43622e-14	1.8468e-13	2.25666e-14
		12.07	1.33401e-13	1.17667e-14	2.09418e-13	2.58651e-14	1.83479e-13	2.2578e-14
		12.09	1.30794e-13	1.11341e-14	2.10506e-13	2.61917e-14	1.89152e-13	2.25877e-14
		12.11	1.30124e-13	9.71934e-15	2.14675e-13	2.60928e-14	1.90785e-13	2.12505e-14
		12.13	1.35263e-13	1.15621e-14	2.12022e-13	2.8091e-14	1.89698e-13	2.24047e-14
		12.15	1.31531e-13	1.03063e-14	2.09031e-13	2.57224e-14	1.80137e-13	2.13223e-14
		12.17	1.32593e-13	1.10556e-14	2.10148e-13	2.79922e-14	1.85003e-13	2.19653e-14
		12.19	1.29164e-13	1.22994e-14	2.0754e-13	2.82187e-14	1.8958e-13	2.42999e-14
		12.21	1.31485e-13	1.22953e-14	2.12875e-13	2.70339e-14	1.83142e-13	2.21078e-14
		12.23	1.21873e-13	1.2357e-14	2.11734e-13	2.72246e-14	1.78397e-13	2.08571e-14
		12.25	1.23175e-13	1.16041e-14	2.10667e-13	2.70198e-14	1.80472e-13	1.92007e-14
		12.27	1.23542e-13	1.05075e-14	2.15583e-13	2.6356e-14	1.78512e-13	2.20498e-14
		12.29	1.24818e-13	1.19117e-14	2.04799e-13	2.77211e-14	1.87624e-13	2.16e-14
		12.31	1.27786e-13	1.47211e-14	2.11363e-13	2.71289e-14	1.84259e-13	2.4644e-14
		12.33	1.24004e-13	9.98913e-15	2.07902e-13	2.76075e-14	1.82995e-13	2.18552e-14
		12.35	1.20935e-13	1.06498e-14	2.07957e-13	2.4649e-14	1.79841e-13	1.56786e-14
		12.37	1.25138e-13	1.05848e-14	2.10682e-13	2.77237e-14	1.77056e-13	2.32879e-14
		12.39	1.24834e-13	1.01762e-14	2.04906e-13	2.73166e-14	1.80174e-13	2.44387e-14
		12.41	1.23409e-13	1.11266e-14	2.10275e-13	2.85581e-14	1.75611e-13	2.6336e-14
		12.43	1.22537e-13	1.02769e-14	2.04915e-13	2.83771e-14	1.81805e-13	2.35323e-14
		12.45	1.21778e-13	1.42133e-14	2.07374e-13	2.60431e-14	1.77262e-13	2.15084e-14
		12.47	1.21561e-13	1.27415e-14	2.06876e-13	2.74567e-14	1.83995e-13	2.13525e-14
		12.49	1.26029e-13	1.17707e-14	2.09799e-13	2.69399e-14	1.83453e-13	2.12586e-14
		12.51	1.30064e-13	1.06847e-14	2.15546e-13	2.48786e-14	1.83728e-13	2.384e-14
		12.53	1.2265e-13	1.23558e-14	2.10186e-13	2.7322e-14	1.73968e-13	1.85546e-14
		12.55	1.26234e-13	1.10926e-14	2.09064e-13	2.78383e-14	1.76195e-13	2.20341e-14
		12.57	1.2321e-13	9.91595e-15	2.12449e-13	2.73206e-14	1.79209e-13	2.05019e-14
		12.59	1.19161e-13	9.85799e-15	2.12664e-13	2.80293e-14	1.80256e-13	2.2357e-14
		12.61	1.24459e-13	1.13112e-14	2.13199e-13	2.906e-14	1.80797e-13	2.07029e-14
		12.63	1.18185e-13	1.13223e-14	2.08397e-13	2.57574e-14	1.80054e-13	2.1927e-14
		12.65	1.23757e-13	1.11967e-14	2.14068e-13	2.61655e-14	1.80257e-13	2.32483e-14
		12.67	1.19686e-13	8.17553e-15	2.08993e-13	2.80051e-14	1.79015e-13	1.94134e-14
		12.69	1.25215e-13	1.10554e-14	2.08968e-13	2.8554e-14	1.74988e-13	2.65595e-14
		12.71	1.1552e-13	1.12456e-14	2.10509e-13	2.60931e-14	1.69749e-13	2.69726e-14
		12.73	1.18838e-13	1.03655e-14	2.10441e-13	2.57872e-14	1.77569e-13	2.50506e-14
		12.75	1.14657e-13	9.29195e-15	2.12787e-13	2.66754e-14	1.77088e-13	2.23102e-14
		12.77	1.20569e-13	1.2397e-14	2.09985e-13	2.61136e-14	1.78221e-13	1.98085e-14
		12.79	1.20097e-13	1.05018e-14	2.08738e-13	2.532e-14	1.84717e-13	1.88944e-14
		12.81	1.13631e-13	1.22997e-14	2.0965e-13	2.77807e-14	1.81037e-13	2.08e-14
		12.83	1.19096e-13	1.05805e-14	2.05877e-13	2.76674e-14	1.79821e-13	1.92764e-14
		12.85	1.17559e-13	1.04159e-14	2.07872e-13	2.66103e-14	1.81117e-13	2.19107e-14
		12.87	1.1851e-13	9.16728e-15	2.09736e-13	2.59413e-14	1.81207e-13	2.23775e-14
		12.89	1.19897e-13	1.1015e-14	2.11114e-13	2.79346e-14	1.77721e-13	2.10548e-14
		12.91	1.17726e-13	9.89718e-15	2.05813e-13	2.51085e-14	1.73902e-13	2.59556e-14
		12.93	1.20718e-13	1.20484e-14	2.02488e-13	2.62239e-14	1.73412e-13	1.79933e-14
		12.95	1.21443e-13	1.21777e-14	2.11548e-13	2.72373e-14	1.86018e-13	1.82475e-14
		12.97	1.14724e-13	7.97413e-15	2.05257e-13	2.69358e-14	1.81527e-13	1.9578e-14
		12.99	1.18443e-13	9.47903e-15	2.06968e-13	2.55126e-14	1.78381e-13	2.1187e-14
		13.01	1.1923e-13	1.08426e-14	2.0922e-13	2.40376e-14	1.82774e-13	2.13283e-14
		13.03	1.16349e-13	1.14634e-14	2.04521e-13	2.83188e-14	1.73785e-13	2.36287e-14
		13.05	1.21374e-13	1.04954e-14	2.05747e-13	2.59336e-14	1.73034e-13	2.33659e-14
		13.07	1.13007e-13	1.18658e-14	2.05388e-13	2.63324e-14	1.66346e-13	2.07907e-14
		13.09	1.16934e-13	1.14865e-14	2.07175e-13	2.61826e-14	1.82341e-13	2.32404e-14
		13.11	1.17811e-13	1.1434e-14	2.05017e-13	2.76184e-14	1.80538e-13	2.19305e-14
		13.13	1.22468e-13	1.23856e-14	2.0636e-13	2.81786e-14	1.75585e-13	2.31348e-14
		13.15	1.17807e-13	1.07442e-14	2.06118e-13	2.60008e-14	1.74561e-13	2.17603e-14
		13.17	1.13996e-13	1.16383e-14	2.09431e-13	2.53165e-14	1.75288e-13	1.98619e-14
		13.19	1.16295e-13	9.46723e-15	2.05458e-13	2.65287e-14	1.75556e-13	2.39937e-14
		13.21	1.17648e-13	1.50095e-14	2.0217e-13	2.78536e-14	1.7246e-13	2.29075e-14
		13.23	1.18085e-13	1.58881e-14	2.0524e-13	2.72965e-14	1.78388e-13	2.19049e-14
		13.25	1.19484e-13	1.08916e-14	2.03818e-13	2.85406e-14	1.84894e-13	2.22812e-14
		13.27	1.08659e-13	1.37925e-14	2.06574e-13	2.71307e-14	1.82174e-13	2.19409e-14
		13.29	1.20235e-13	1.1707e-14	2.06106e-13	2.76152e-14	1.84719e-13	2.56279e-14
		13.31	1.13895e-13	1.3816e-14	2.02913e-13	2.72459e-14	1.7808e-13	2.31547e-14
		13.33	1.082e-13	1.17394e-14	2.06061e-13	2.66379e-14	1.77072e-13	2.14122e-14
		13.35	1.16523e-13	1.23249e-14	2.04442e-13	2.79163e-14	1.75149e-13	2.31308e-14
		13.37	1.13243e-13	1.33017e-14	2.02522e-13	2.70338e-14	1.69876e-13	1.96258e-14
		13.39	1.17944e-13	1.45855e-14	2.05261e-13	2.82214e-14	1.77374e-13	2.0149e-14
		13.41	1.15454e-13	1.18772e-14	2.03e-13	2.63508e-14	1.81015e-13	2.24881e-14
		13.43	1.15345e-13	1.1259e-14	2.07776e-13	2.63905e-14	1.78883e-13	2.2669e-14
		13.45	1.13287e-13	1.20156e-14	2.06045e-13	2.78489e-14	1.8136e-13	2.2017e-14
		13.47	1.1128e-13	1.34085e-14	2.05993e-13	2.60033e-14	1.82527e-13	2.05343e-14
		13.49	1.12538e-13	9.88932e-15	2.02385e-13	2.52926e-14	1.75001e-13	1.79401e-14
		13.51	1.08822e-13	1.23629e-14	2.08508e-13	2.55366e-14	1.66004e-13	2.49028e-14
		13.53	1.13346e-13	1.34105e-14	2.06543e-13	2.4115e-14	1.73594e-13	2.22107e-14
		13.55	1.11824e-13	1.44884e-14	2.04852e-13	2.67642e-14	1.76305e-13	1.91007e-14
		13.57	1.12048e-13	1.5987e-14	2.09873e-13	2.52027e-14	1.71606e-13	1.84045e-14
		13.59	1.14008e-13	1.11497e-14	2.04647e-13	2.54534e-14	1.77633e-13	2.17018e-14
		13.61	1.16049e-13	1.25384e-14	2.12101e-13	2.43885e-14	1.73173e-13	2.15763e-14
		13.63	1.12218e-13	1.26128e-14	2.07214e-13	2.72396e-14	1.70945e-13	2.1407e-14
		13.65	1.08418e-13	1.13242e-14	2.07297e-13	2.54309e-14	1.71879e-13	2.13282e-14
		13.67	1.11213e-13	1.16676e-14	2.02949e-13	2.85949e-14	1.79657e-13	2.15516e-14
		13.69	1.14047e-13	1.44598e-14	2.06661e-13	2.78723e-14	1.77867e-13	2.1723e-14
		13.71	1.10673e-13	1.33007e-14	2.10412e-13	2.48951e-14	1.77407e-13	2.2999e-14
		13.73	1.10607e-13	1.28564e-14	2.06843e-13	2.84746e-14	1.75785e-13	2.08375e-14
		13.75	1.11004e-13	1.2639e-14	2.01514e-13	2.65353e-14	1.72837e-13	1.88504e-14
		13.77	1.0896e-13	1.19731e-14	2.05548e-13	2.4702e-14	1.72309e-13	2.13433e-14
		13.79	1.13069e-13	1.36121e-14	2.03539e-13	2.34361e-14	1.72329e-13	2.31744e-14
		13.81	1.0867e-13	1.33687e-14	2.06762e-13	2.58192e-14	1.78353e-13	2.1204e-14
		13.83	1.16067e-13	1.4418e-14	2.09625e-13	2.49362e-14	1.7725e-13	1.92199e-14
		13.85	1.0847e-13	1.05479e-14	2.04906e-13	2.94951e-14	1.75946e-13	1.666e-14
		13.87	1.06875e-13	1.45334e-14	2.07849e-13	2.63389e-14	1.76466e-13	2.13608e-14
		13.89	1.10059e-13	1.26674e-14	1.9826e-13	2.57711e-14	1.79126e-13	2.14036e-14
		13.91	1.003e-13	1.26382e-14	2.01443e-13	2.57617e-14	1.76096e-13	2.21446e-14
		13.93	1.00878e-13	1.16775e-14	2.05045e-13	2.68213e-14	1.76992e-13	1.97638e-14
		13.95	1.09607e-13	1.20928e-14	2.04336e-13	2.76522e-14	1.67653e-13	2.1588e-14
		13.97	9.9033e-14	9.10902e-15	2.03198e-13	2.88774e-14	1.67973e-13	2.07472e-14
		13.99	1.10909e-13	1.38745e-14	1.9973e-13	2.92866e-14	1.69923e-13	2.15733e-14
		14.01	1.08085e-13	1.07889e-14	2.03185e-13	2.90237e-14	1.69275e-13	2.25547e-14
		14.03	1.01011e-13	1.26573e-14	2.02177e-13	2.79488e-14	1.72538e-13	2.12083e-14
		14.05	1.09798e-13	1.41923e-14	2.04857e-13	2.60173e-14	1.66966e-13	2.19701e-14
		14.07	1.05554e-13	1.25666e-14	2.09068e-13	2.48634e-14	1.68625e-13	2.37025e-14
		14.09	1.04157e-13	1.14905e-14	2.04186e-13	2.67612e-14	1.71972e-13	2.15567e-14
		14.11	1.05905e-13	1.33422e-14	2.08961e-13	2.76058e-14	1.73755e-13	2.3949e-14
		14.13	1.0569e-13	1.29388e-14	2.05312e-13	2.49739e-14	1.72264e-13	2.15384e-14
		14.15	1.05073e-13	1.36104e-14	2.0206e-13	2.77941e-14	1.71537e-13	1.85673e-14
		14.17	1.03623e-13	1.31484e-14	2.08782e-13	2.5469e-14	1.76719e-13	1.8432e-14
		14.19	1.12722e-13	1.46186e-14	2.05443e-13	2.70577e-14	1.71771e-13	2.06104e-14
		14.21	1.05194e-13	1.29176e-14	2.04938e-13	2.75735e-14	1.71495e-13	1.99569e-14
		14.23	1.05543e-13	1.2054e-14	2.03245e-13	2.83363e-14	1.71542e-13	2.08137e-14
		14.25	1.04919e-13	1.18605e-14	2.0039e-13	2.62522e-14	1.68648e-13	2.4482e-14
		14.27	1.04335e-13	1.51423e-14	2.08609e-13	2.63334e-14	1.77393e-13	2.1251e-14
		14.29	1.09341e-13	1.64879e-14	2.07011e-13	2.49598e-14	1.7655e-13	2.03069e-14
		14.31	1.03409e-13	1.45803e-14	2.01984e-13	2.73409e-14	1.72279e-13	1.95745e-14
		14.33	1.07688e-13	1.43886e-14	2.01641e-13	2.4723e-14	1.72818e-13	2.17113e-14
		14.35	1.05107e-13	1.65372e-14	2.00627e-13	2.62368e-14	1.68928e-13	2.17006e-14
		14.37	1.07092e-13	1.77909e-14	2.0902e-13	2.48274e-14	1.696e-13	2.33364e-14
		14.39	9.80455e-14	1.31758e-14	1.99219e-13	2.64423e-14	1.66046e-13	2.05126e-14
		14.41	1.01815e-13	1.35159e-14	2.053e-13	2.95195e-14	1.68944e-13	2.37038e-14
		14.43	1.01687e-13	1.63486e-14	2.04135e-13	2.48675e-14	1.68548e-13	2.10579e-14
		14.45	9.61116e-14	1.37843e-14	2.00641e-13	2.81334e-14	1.69626e-13	2.13337e-14
		14.47	1.02755e-13	1.74779e-14	2.03783e-13	2.70436e-14	1.65536e-13	2.3809e-14
		14.49	1.00889e-13	1.28679e-14	1.9684e-13	2.71035e-14	1.7153e-13	2.37765e-14
		14.51	1.01563e-13	1.19602e-14	1.99531e-13	2.51437e-14	1.69146e-13	2.63885e-14
		14.53	9.82623e-14	1.31357e-14	2.03094e-13	2.68267e-14	1.73548e-13	2.07646e-14
		14.55	1.07332e-13	1.38159e-14	2.03506e-13	2.88788e-14	1.67873e-13	2.46873e-14
		14.57	9.22955e-14	1.42317e-14	2.02491e-13	2.80946e-14	1.68603e-13	1.86151e-14
		14.59	9.22945e-14	1.48784e-14	2.03503e-13	2.70107e-14	1.77057e-13	1.9124e-14
		14.61	9.7783e-14	1.30691e-14	2.02951e-13	3.14243e-14	1.713e-13	1.96421e-14
		14.63	1.02512e-13	1.25776e-14	2.02492e-13	2.63569e-14	1.64958e-13	2.32617e-14
		14.65	9.21757e-14	1.36704e-14	1.99472e-13	2.86219e-14	1.74784e-13	2.0296e-14
		14.67	9.49519e-14	1.17338e-14	2.05765e-13	2.75246e-14	1.71227e-13	2.15702e-14
		14.69	9.52318e-14	1.23524e-14	2.00287e-13	2.78432e-14	1.71479e-13	1.95092e-14
		14.71	9.41221e-14	1.37126e-14	2.04958e-13	2.76523e-14	1.73232e-13	1.93768e-14
		14.73	8.94456e-14	1.05438e-14	2.03195e-13	2.71556e-14	1.7719e-13	1.84498e-14
		14.75	9.3719e-14	1.56876e-14	2.03751e-13	3.09815e-14	1.68671e-13	2.00453e-14
		14.77	9.05448e-14	1.53673e-14	2.01268e-13	2.95616e-14	1.72075e-13	2.01197e-14
		14.79	9.80408e-14	1.40137e-14	2.0356e-13	2.63967e-14	1.68476e-13	2.15577e-14
		14.81	9.52783e-14	1.47007e-14	2.0614e-13	2.8177e-14	1.75381e-13	2.08335e-14
		14.83	9.99562e-14	1.51497e-14	1.99703e-13	2.5271e-14	1.72027e-13	1.84375e-14
		14.85	8.74527e-14	1.27749e-14	2.05055e-13	2.77513e-14	1.76707e-13	2.33555e-14
		14.87	9.93797e-14	1.59318e-14	2.03277e-13	2.83593e-14	1.70757e-13	2.11221e-14
		14.89	9.31809e-14	1.42287e-14	2.04597e-13	2.81432e-14	1.71656e-13	2.00635e-14
		14.91	9.31629e-14	1.683e-14	2.08855e-13	2.85031e-14	1.72256e-13	2.39805e-14
		14.93	9.44196e-14	1.4128e-14	2.08347e-13	2.74343e-14	1.66067e-13	1.93763e-14
		14.95	9.45447e-14	1.48692e-14	2.03943e-13	2.86661e-14	1.67784e-13	2.21938e-14
		14.97	8.91296e-14	1.25455e-14	2.08126e-13	2.70428e-14	1.69842e-13	2.24142e-14
		14.99	9.57047e-14	1.59017e-14	2.03874e-13	2.78474e-14	1.66542e-13	2.31121e-14
		15.01	9.22015e-14	1.40622e-14	2.0295e-13	2.90181e-14	1.61294e-13	2.12704e-14
		15.03	9.20188e-14	1.55942e-14	2.02316e-13	2.83363e-14	1.69302e-13	2.24152e-14
		15.05	9.38108e-14	1.69048e-14	1.99848e-13	2.81036e-14	1.60866e-13	1.79811e-14
		15.07	8.88999e-14	1.5893e-14	2.0679e-13	2.75097e-14	1.71676e-13	1.98734e-14
		15.09	8.80911e-14	1.49086e-14	2.0257e-13	2.80581e-14	1.75039e-13	2.26034e-14
		15.11	9.31203e-14	1.238e-14	2.02516e-13	2.90779e-14	1.74948e-13	2.03488e-14
		15.13	9.36893e-14	1.47683e-14	2.05971e-13	2.53841e-14	1.70583e-13	2.08203e-14
		15.15	9.47815e-14	1.67667e-14	2.0298e-13	2.91584e-14	1.68683e-13	1.93727e-14
		15.17	8.86887e-14	1.49535e-14	2.08956e-13	2.75382e-14	1.77479e-13	1.85187e-14
		15.19	8.55768e-14	1.53194e-14	2.0368e-13	2.82491e-14	1.69924e-13	1.91005e-14
		15.21	9.19515e-14	1.48144e-14	2.01086e-13	2.85319e-14	1.68903e-13	2.27817e-14
		15.23	9.01996e-14	1.30421e-14	2.06469e-13	2.62672e-14	1.70191e-13	1.8901e-14
		15.25	9.15322e-14	1.71075e-14	2.06627e-13	2.74256e-14	1.7525e-13	2.28146e-14
		15.27	8.72789e-14	1.36922e-14	2.02324e-13	2.64259e-14	1.7231e-13	1.97388e-14
		15.29	8.73749e-14	1.40348e-14	2.05554e-13	2.61016e-14	1.79542e-13	2.2932e-14
		15.31	9.25921e-14	1.70353e-14	2.07694e-13	2.68739e-14	1.74313e-13	2.1353e-14
		15.33	8.80709e-14	1.45109e-14	2.0275e-13	2.71419e-14	1.74032e-13	2.00172e-14
		15.35	8.98472e-14	1.57627e-14	2.06637e-13	3.03062e-14	1.74028e-13	1.68563e-14
		15.37	8.37045e-14	1.49835e-14	2.04268e-13	2.88558e-14	1.72395e-13	2.18292e-14
		15.39	8.14537e-14	1.55915e-14	2.02406e-13	2.75964e-14	1.74489e-13	2.11148e-14
		15.41	8.9808e-14	1.27232e-14	2.06875e-13	3.0591e-14	1.74579e-13	2.14448e-14
		15.43	8.41723e-14	1.36511e-14	2.0867e-13	2.85663e-14	1.71892e-13	2.08087e-14
		15.45	8.51599e-14	1.43208e-14	2.1121e-13	2.87379e-14	1.7131e-13	1.65438e-14
		15.47	8.26805e-14	1.72262e-14	2.01639e-13	2.7394e-14	1.72648e-13	2.06099e-14
		15.49	8.51788e-14	1.42463e-14	2.03965e-13	2.87212e-14	1.68487e-13	2.02067e-14
		15.51	9.15952e-14	1.56925e-14	2.03391e-13	2.67725e-14	1.708e-13	2.38426e-14
		15.53	7.86619e-14	1.20985e-14	2.06623e-13	2.82285e-14	1.67885e-13	1.92609e-14
		15.55	8.21145e-14	1.32037e-14	2.0425e-13	3.01996e-14	1.79558e-13	1.96419e-14
		15.57	9.01286e-14	1.67099e-14	2.10217e-13	2.67258e-14	1.76281e-13	2.12903e-14
		15.59	8.18005e-14	1.33328e-14	2.09761e-13	2.85429e-14	1.7497e-13	1.79966e-14
		15.61	9.09153e-14	1.81797e-14	2.05062e-13	2.89065e-14	1.71214e-13	1.99268e-14
		15.63	8.10392e-14	1.54038e-14	2.0086e-13	2.71169e-14	1.82187e-13	2.91799e-14
		15.65	7.98386e-14	1.44328e-14	2.05919e-13	2.92898e-14	1.72151e-13	1.74381e-14
		15.67	7.95082e-14	1.47447e-14	2.05278e-13	2.97687e-14	1.74755e-13	2.00139e-14
		15.69	8.31567e-14	1.70557e-14	2.13158e-13	2.78699e-14	1.76732e-13	1.73681e-14
		15.71	7.82424e-14	1.16357e-14	2.0727e-13	3.13978e-14	1.70832e-13	1.71228e-14
		15.73	8.51382e-14	1.52949e-14	2.05535e-13	2.62366e-14	1.7556e-13	1.76362e-14
		15.75	8.28932e-14	1.5421e-14	2.07466e-13	2.84062e-14	1.73852e-13	1.76692e-14
		15.77	8.00563e-14	1.44548e-14	2.04473e-13	2.93528e-14	1.78141e-13	2.15001e-14
		15.79	7.67488e-14	1.26922e-14	2.03902e-13	2.76443e-14	1.81812e-13	1.84525e-14
		15.81	8.22462e-14	1.66045e-14	2.083e-13	2.92062e-14	1.7796e-13	2.03177e-14
		15.83	8.40496e-14	1.47936e-14	2.09437e-13	2.70992e-14	1.79305e-13	2.04817e-14
		15.85	7.94177e-14	1.45114e-14	2.08107e-13	3.04089e-14	1.73612e-13	2.08266e-14
		15.87	8.4161e-14	1.54173e-14	2.11443e-13	2.74583e-14	1.71609e-13	1.78073e-14
		15.89	7.85858e-14	1.37216e-14	2.08193e-13	2.96424e-14	1.75309e-13	1.84876e-14
		15.91	7.63832e-14	1.31811e-14	2.06748e-13	2.89504e-14	1.80202e-13	1.99407e-14
		15.93	7.98981e-14	1.42854e-14	2.03147e-13	2.83732e-14	1.80169e-13	2.10996e-14
		15.95	8.20651e-14	1.57889e-14	2.08319e-13	3.1005e-14	1.77678e-13	1.93779e-14
		15.97	7.59903e-14	1.43704e-14	2.05618e-13	3.05768e-14	1.65705e-13	1.83572e-14
		15.99	7.90418e-14	1.32329e-14	2.00577e-13	2.98203e-14	1.70504e-13	1.72739e-14
		16.01	8.1478e-14	1.4652e-14	2.05218e-13	2.93509e-14	1.66806e-13	2.07126e-14
		16.03	7.45339e-14	1.154e-14	2.05757e-13	3.00899e-14	1.66347e-13	1.8596e-14
		16.05	7.75459e-14	1.39029e-14	2.05507e-13	3.05277e-14	1.74355e-13	1.99865e-14
		16.07	8.15109e-14	1.42066e-14	2.0261e-13	2.75036e-14	1.75919e-13	1.88095e-14
		16.09	7.62072e-14	1.55137e-14	2.06994e-13	3.12207e-14	1.71047e-13	1.75114e-14
		16.11	8.16762e-14	1.66164e-14	2.05513e-13	3.07611e-14	1.70118e-13	1.8737e-14
		16.13	7.28534e-14	1.33799e-14	2.06169e-13	2.83076e-14	1.71551e-13	1.76239e-14
		16.15	7.26108e-14	1.39248e-14	2.04506e-13	2.76908e-14	1.71867e-13	1.5391e-14
		16.17	7.57334e-14	1.51634e-14	2.06464e-13	2.81618e-14	1.64532e-13	1.78136e-14
		16.19	7.24392e-14	1.41289e-14	2.07695e-13	3.01213e-14	1.68558e-13	1.85243e-14
		16.21	7.55267e-14	1.44808e-14	2.12626e-13	2.86568e-14	1.58591e-13	1.62402e-14
		16.23	7.53058e-14	1.54743e-14	2.08708e-13	2.66688e-14	1.68616e-13	2.02792e-14
		16.25	7.56384e-14	1.26449e-14	2.0705e-13	3.15886e-14	1.5885e-13	1.81148e-14
		16.27	7.74915e-14	1.4686e-14	2.1117e-13	2.80108e-14	1.62883e-13	1.91929e-14
		16.29	7.71526e-14	1.43452e-14	2.12757e-13	2.84403e-14	1.66141e-13	1.60448e-14
		16.31	7.40183e-14	1.40521e-14	2.07303e-13	3.19612e-14	1.67011e-13	1.94927e-14
		16.33	8.19735e-14	1.56862e-14	2.08251e-13	2.50837e-14	1.60864e-13	1.9758e-14
		16.35	7.22298e-14	1.43519e-14	2.10665e-13	2.85462e-14	1.63479e-13	1.83768e-14
		16.37	7.66369e-14	1.36109e-14	2.11638e-13	2.7663e-14	1.66506e-13	1.93088e-14
		16.39	7.48747e-14	1.36093e-14	2.10874e-13	2.95427e-14	1.66891e-13	1.8643e-14
		16.41	8.33902e-14	1.80577e-14	2.06578e-13	3.16968e-14	1.70047e-13	2.10636e-14
		16.43	8.36876e-14	1.45942e-14	2.09303e-13	2.61464e-14	1.71052e-13	1.9763e-14
		16.45	7.5864e-14	1.51516e-14	2.09936e-13	2.80975e-14	1.76712e-13	2.06889e-14
		16.47	7.65522e-14	1.59048e-14	2.09949e-13	2.83082e-14	1.74617e-13	1.87745e-14
		16.49	7.22484e-14	1.37642e-14	2.06448e-13	2.89082e-14	1.72396e-13	2.4508e-14
		16.51	7.4516e-14	1.42815e-14	2.09092e-13	2.68489e-14	1.61783e-13	1.9104e-14
		16.53	7.48025e-14	1.64219e-14	2.09149e-13	2.88973e-14	1.7448e-13	2.38425e-14
		16.55	7.26656e-14	1.33686e-14	2.0935e-13	2.79437e-14	1.75537e-13	2.25606e-14
		16.57	7.75114e-14	1.74482e-14	2.04698e-13	2.77808e-14	1.61056e-13	1.62914e-14
		16.59	7.87244e-14	1.61862e-14	2.0767e-13	2.90438e-14	1.68137e-13	2.07442e-14
		16.61	7.2126e-14	1.56042e-14	2.06136e-13	2.93254e-14	1.71882e-13	2.44336e-14
		16.63	8.47463e-14	1.76728e-14	2.09082e-13	3.06147e-14	1.7571e-13	1.94306e-14
		16.65	6.95928e-14	1.49378e-14	2.06854e-13	2.83216e-14	1.68425e-13	1.43376e-14
		16.67	7.99334e-14	1.64289e-14	2.06914e-13	2.97315e-14	1.8411e-13	2.2102e-14
		16.69	7.80855e-14	1.74839e-14	2.06837e-13	2.90987e-14	1.74832e-13	1.70275e-14
		16.71	8.01814e-14	1.61274e-14	2.04347e-13	2.80381e-14	1.79621e-13	1.57563e-14
		16.73	8.04768e-14	1.64243e-14	2.06397e-13	2.69842e-14	1.77493e-13	1.89103e-14
		16.75	7.44983e-14	1.53687e-14	2.06586e-13	3.06723e-14	1.80287e-13	1.9686e-14
		16.77	8.14469e-14	1.64604e-14	2.12225e-13	3.03623e-14	1.73528e-13	2.12378e-14
		16.79	7.96958e-14	1.69842e-14	2.09146e-13	2.75834e-14	1.6946e-13	1.70948e-14
		16.81	7.40235e-14	1.5668e-14	2.07432e-13	2.6689e-14	1.75963e-13	2.05463e-14
		16.83	7.52044e-14	1.41923e-14	2.06699e-13	2.8356e-14	1.71579e-13	1.78688e-14
		16.85	7.06568e-14	1.44119e-14	2.08074e-13	2.99027e-14	1.76095e-13	1.92353e-14
		16.87	8.17054e-14	1.60158e-14	2.07017e-13	3.13323e-14	1.66624e-13	1.92345e-14
		16.89	7.30272e-14	1.49107e-14	2.08952e-13	2.83685e-14	1.63314e-13	1.58139e-14
		16.91	7.22376e-14	1.4055e-14	2.08556e-13	2.87602e-14	1.64435e-13	1.3973e-14
		16.93	7.30815e-14	1.7726e-14	2.1336e-13	2.70246e-14	1.72872e-13	1.92293e-14
		16.95	7.40756e-14	1.66425e-14	2.10061e-13	2.95244e-14	1.6498e-13	1.7638e-14
		16.97	7.10986e-14	1.51849e-14	2.12249e-13	2.72636e-14	1.74755e-13	1.6219e-14
		16.99	7.28091e-14	1.50717e-14	2.08107e-13	2.78286e-14	1.70302e-13	1.76779e-14
		17.01	7.32801e-14	1.3755e-14	2.10178e-13	2.67119e-14	1.72274e-13	1.65898e-14
		17.03	7.5366e-14	1.43931e-14	2.13421e-13	2.76719e-14	1.64372e-13	1.8889e-14
		17.05	6.82872e-14	1.58743e-14	2.10995e-13	2.57589e-14	1.71553e-13	1.50695e-14
		17.07	7.18482e-14	1.52627e-14	2.07908e-13	2.8202e-14	1.70858e-13	1.7978e-14
		17.09	7.38159e-14	1.67536e-14	2.10272e-13	2.92382e-14	1.74949e-13	1.85538e-14
		17.11	7.23937e-14	1.73924e-14	2.13552e-13	3.00745e-14	1.68238e-13	1.90562e-14
		17.13	8.04181e-14	1.74772e-14	2.12927e-13	2.83348e-14	1.68397e-13	2.12737e-14
		17.15	6.43267e-14	1.57446e-14	2.06505e-13	2.80399e-14	1.65886e-13	1.6631e-14
		17.17	6.72464e-14	1.43858e-14	2.09333e-13	2.71736e-14	1.64701e-13	1.83344e-14
		17.19	7.28207e-14	1.48272e-14	2.11877e-13	2.87779e-14	1.62261e-13	1.46178e-14
		17.21	5.99382e-14	1.20571e-14	2.08626e-13	2.88714e-14	1.64519e-13	1.68883e-14
		17.23	7.20397e-14	1.43666e-14	2.08841e-13	3.27153e-14	1.62357e-13	1.50261e-14
		17.25	6.80499e-14	1.59131e-14	2.09131e-13	2.83796e-14	1.66159e-13	1.70873e-14
		17.27	6.49603e-14	1.3429e-14	2.07616e-13	2.74423e-14	1.65776e-13	1.55844e-14
		17.29	6.49367e-14	1.39174e-14	2.09983e-13	2.68546e-14	1.67802e-13	1.41523e-14
		17.31	7.02235e-14	1.2508e-14	2.07869e-13	2.6725e-14	1.633e-13	1.72982e-14
		17.33	6.57254e-14	1.49844e-14	2.10127e-13	2.94403e-14	1.70205e-13	1.84022e-14
		17.35	6.09406e-14	1.2412e-14	2.1012e-13	2.61807e-14	1.65471e-13	1.48246e-14
		17.37	6.6331e-14	1.59715e-14	2.08916e-13	2.98011e-14	1.7037e-13	1.76807e-14
		17.39	6.37591e-14	1.25859e-14	2.08212e-13	3.08748e-14	1.69043e-13	1.69965e-14
		17.41	6.84616e-14	1.0252e-14	2.06087e-13	2.84153e-14	1.63801e-13	1.76045e-14
		17.43	6.37069e-14	1.16716e-14	2.05303e-13	3.16003e-14	1.73584e-13	1.7199e-14
		17.45	5.8102e-14	9.71388e-15	2.05887e-13	3.05108e-14	1.65998e-13	1.9421e-14
		17.47	6.74755e-14	1.39808e-14	2.15153e-13	3.07748e-14	1.69162e-13	1.72442e-14
		17.49	6.20263e-14	1.1115e-14	2.05182e-13	3.04247e-14	1.69721e-13	1.78571e-14
		17.51	7.0276e-14	1.17534e-14	2.06867e-13	2.8053e-14	1.65726e-13	1.81532e-14
		17.53	6.04762e-14	9.43011e-15	2.05673e-13	3.02792e-14	1.62627e-13	1.65364e-14
		17.55	6.64036e-14	1.27495e-14	2.03903e-13	2.72008e-14	1.66674e-13	1.79953e-14
		17.57	6.52512e-14	1.14214e-14	2.09778e-13	2.90834e-14	1.70677e-13	1.88987e-14
		17.59	6.72442e-14	1.18138e-14	2.10465e-13	2.82932e-14	1.64818e-13	1.74538e-14
		17.61	6.16305e-14	9.30734e-15	2.02796e-13	3.13171e-14	1.60799e-13	1.81696e-14
		17.63	6.90202e-14	1.42408e-14	2.12498e-13	2.91336e-14	1.63538e-13	1.99736e-14
		17.65	6.23434e-14	1.11064e-14	2.0595e-13	3.09763e-14	1.65968e-13	1.39569e-14
		17.67	5.6162e-14	9.27562e-15	2.0781e-13	3.20919e-14	1.67108e-13	1.81494e-14
		17.69	6.36725e-14	1.08628e-14	2.09021e-13	3.03655e-14	1.6813e-13	1.64077e-14
		17.71	6.481e-14	9.30219e-15	2.05828e-13	3.03738e-14	1.68025e-13	1.69873e-14
		17.73	6.07022e-14	1.22415e-14	2.07398e-13	2.91521e-14	1.62636e-13	1.57311e-14
		17.75	6.21299e-14	1.0685e-14	2.06e-13	2.99318e-14	1.63848e-13	1.63633e-14
		17.77	6.08296e-14	1.06562e-14	2.12952e-13	2.85189e-14	1.67585e-13	1.71509e-14
		17.79	6.50869e-14	1.41225e-14	2.0665e-13	2.98111e-14	1.71545e-13	1.90286e-14
		17.81	6.30473e-14	1.26874e-14	2.09377e-13	3.05273e-14	1.62986e-13	1.56128e-14
		17.83	6.3393e-14	1.39989e-14	2.11764e-13	3.05619e-14	1.68642e-13	1.6238e-14
		17.85	6.55076e-14	1.25289e-14	2.06824e-13	2.87968e-14	1.70911e-13	1.86004e-14
		17.87	6.27471e-14	9.27554e-15	2.07658e-13	3.02856e-14	1.69574e-13	1.83074e-14
		17.89	6.72796e-14	1.03363e-14	2.097e-13	2.96528e-14	1.69997e-13	1.38628e-14
		17.91	6.29617e-14	1.23794e-14	2.12399e-13	3.0358e-14	1.69425e-13	1.80659e-14
		17.93	5.92278e-14	1.06217e-14	2.09292e-13	3.03087e-14	1.64672e-13	1.60706e-14
		17.95	6.4983e-14	1.2892e-14	2.0269e-13	2.86733e-14	1.71315e-13	1.72559e-14
		17.97	5.65853e-14	9.32216e-15	2.08205e-13	3.10203e-14	1.60914e-13	1.70923e-14
		17.99	6.24544e-14	1.08169e-14	2.06919e-13	3.01178e-14	1.6472e-13	1.89189e-14
		18.01	5.93731e-14	9.48211e-15	2.04774e-13	2.98469e-14	1.64802e-13	1.75982e-14
		18.03	5.97055e-14	1.2267e-14	2.08296e-13	3.0178e-14	1.62126e-13	1.54155e-14
		18.05	6.17648e-14	1.21568e-14	2.06137e-13	2.95522e-14	1.62885e-13	1.70953e-14
		18.07	5.96824e-14	1.10546e-14	2.0721e-13	3.07139e-14	1.66554e-13	1.99373e-14
		18.09	5.69542e-14	1.22088e-14	2.0568e-13	3.01837e-14	1.63417e-13	1.79287e-14
		18.11	5.2567e-14	8.31607e-15	2.02771e-13	3.0867e-14	1.64956e-13	1.79575e-14
		18.13	5.43086e-14	1.14381e-14	2.03795e-13	2.76925e-14	1.68346e-13	1.80746e-14
		18.15	5.43889e-14	1.20203e-14	2.06208e-13	2.8402e-14	1.63358e-13	1.64097e-14
		18.17	4.98046e-14	8.67462e-15	2.09629e-13	2.70906e-14	1.69653e-13	1.89954e-14
		18.19	5.50258e-14	1.36238e-14	2.05382e-13	2.63627e-14	1.59761e-13	1.66321e-14
		18.21	4.87312e-14	6.84393e-15	2.05425e-13	2.80474e-14	1.6411e-13	1.81814e-14
		18.23	5.18395e-14	1.08537e-14	2.08007e-13	2.70252e-14	1.57841e-13	1.87333e-14
		18.25	5.75859e-14	8.9378e-15	2.04797e-13	2.75205e-14	1.66427e-13	1.8263e-14
		18.27	5.41135e-14	1.00899e-14	2.0973e-13	2.67604e-14	1.61314e-13	1.72651e-14
		18.29	6.05959e-14	1.12338e-14	2.04216e-13	3.0105e-14	1.68734e-13	1.99547e-14
		18.31	5.81349e-14	1.12911e-14	2.06734e-13	2.9614e-14	1.64019e-13	1.90735e-14
		18.33	5.82953e-14	1.39902e-14	2.08455e-13	2.72079e-14	1.66024e-13	1.78349e-14
		18.35	5.40575e-14	1.06372e-14	2.03808e-13	2.62296e-14	1.61524e-13	2.05154e-14
		18.37	5.23163e-14	1.00586e-14	2.13831e-13	2.79431e-14	1.67482e-13	2.00972e-14
		18.39	4.70737e-14	8.37861e-15	2.03503e-13	2.69057e-14	1.64451e-13	1.85442e-14
		18.41	4.74448e-14	5.87889e-15	2.09485e-13	2.7904e-14	1.62697e-13	1.73309e-14
		18.43	5.22869e-14	8.68362e-15	2.07817e-13	2.71289e-14	1.65424e-13	1.96158e-14
		18.45	5.0654e-14	8.62019e-15	2.12064e-13	2.62162e-14	1.63241e-13	1.75458e-14
		18.47	5.28911e-14	1.08234e-14	2.13229e-13	3.04608e-14	1.6499e-13	1.52315e-14
		18.49	5.2089e-14	9.4953e-15	2.07159e-13	2.72221e-14	1.61563e-13	1.58399e-14
		18.51	4.74986e-14	6.4093e-15	2.07887e-13	2.95561e-14	1.56923e-13	1.90064e-14
		18.53	5.04828e-14	9.63609e-15	2.09144e-13	2.66156e-14	1.6468e-13	1.72956e-14
		18.55	4.98932e-14	8.41207e-15	2.07727e-13	2.64454e-14	1.64719e-13	1.74212e-14
		18.57	5.45715e-14	9.0082e-15	2.08704e-13	2.73582e-14	1.63199e-13	1.5728e-14
		18.59	4.59505e-14	7.08888e-15	2.10888e-13	2.55108e-14	1.68986e-13	1.74688e-14
		18.61	4.78704e-14	1.00265e-14	2.11954e-13	2.50831e-14	1.65597e-13	1.83423e-14
		18.63	4.62183e-14	1.00777e-14	2.13357e-13	2.62125e-14	1.57235e-13	1.78468e-14
		18.65	5.21313e-14	9.70551e-15	2.14191e-13	2.57767e-14	1.6891e-13	1.81348e-14
		18.67	4.15573e-14	7.5199e-15	2.07265e-13	2.92084e-14	1.62397e-13	1.60539e-14
		18.69	4.77516e-14	8.84768e-15	2.12578e-13	2.61763e-14	1.54318e-13	1.76066e-14
		18.71	4.70801e-14	9.64721e-15	2.13387e-13	2.70874e-14	1.58703e-13	1.71757e-14
		18.73	4.73273e-14	8.56728e-15	2.09829e-13	2.84073e-14	1.6508e-13	1.59555e-14
		18.75	4.93267e-14	6.56078e-15	2.06534e-13	2.65955e-14	1.58578e-13	1.75453e-14
		18.77	4.86293e-14	7.98925e-15	2.10834e-13	2.72108e-14	1.64743e-13	1.50449e-14
		18.79	4.86871e-14	1.23002e-14	2.15341e-13	2.78101e-14	1.70077e-13	1.75663e-14
		18.81	4.75722e-14	1.08587e-14	2.09866e-13	2.41362e-14	1.59487e-13	1.37625e-14
		18.83	4.73749e-14	9.91777e-15	2.10483e-13	2.88155e-14	1.68547e-13	1.38042e-14
		18.85	4.52558e-14	1.00488e-14	2.10424e-13	2.68222e-14	1.69306e-13	1.61071e-14
		18.87	5.16048e-14	8.29568e-15	2.16853e-13	2.56792e-14	1.6799e-13	1.7533e-14
		18.89	3.87725e-14	9.12077e-15	2.13105e-13	2.68907e-14	1.59637e-13	1.45408e-14
		18.91	4.27491e-14	7.00343e-15	2.16111e-13	2.68605e-14	1.62118e-13	1.77797e-14
		18.93	4.26944e-14	1.08259e-14	2.15524e-13	2.49665e-14	1.59131e-13	1.70545e-14
		18.95	4.33508e-14	9.13618e-15	2.16153e-13	2.68896e-14	1.64715e-13	1.3805e-14
		18.97	4.10859e-14	9.83021e-15	2.13533e-13	2.7715e-14	1.65309e-13	1.88319e-14
		18.99	4.33543e-14	6.303e-15	2.12174e-13	2.58623e-14	1.58652e-13	1.62256e-14
		19.01	4.78563e-14	7.56541e-15	2.13366e-13	2.52495e-14	1.67733e-13	1.4885e-14
		19.03	4.84864e-14	1.18919e-14	2.16425e-13	2.79163e-14	1.57552e-13	1.71815e-14
		19.05	4.32401e-14	7.7943e-15	2.09789e-13	2.85949e-14	1.64802e-13	1.87157e-14
		19.07	3.84184e-14	7.86755e-15	2.13975e-13	2.48989e-14	1.66603e-13	1.73857e-14
		19.09	4.48445e-14	8.62935e-15	2.12873e-13	2.42632e-14	1.62661e-13	1.78e-14
		19.11	4.24176e-14	8.14289e-15	2.18578e-13	2.43648e-14	1.62092e-13	1.51172e-14
		19.13	3.95062e-14	8.04789e-15	2.13194e-13	2.55846e-14	1.68878e-13	1.7136e-14
		19.15	4.51492e-14	7.27833e-15	2.14644e-13	2.45306e-14	1.64854e-13	1.84679e-14
		19.17	4.2495e-14	1.16277e-14	2.16196e-13	2.68057e-14	1.66441e-13	1.83228e-14
		19.19	4.68099e-14	1.1723e-14	2.12319e-13	2.66412e-14	1.64753e-13	1.73176e-14
		19.21	4.50825e-14	9.35914e-15	2.18802e-13	3.05963e-14	1.67427e-13	1.76793e-14
		19.23	4.3578e-14	9.67324e-15	2.15473e-13	2.49538e-14	1.63545e-13	1.7098e-14
		19.25	3.79839e-14	1.21183e-14	2.1371e-13	2.74647e-14	1.61994e-13	1.99703e-14
		19.27	3.46471e-14	7.42845e-15	2.13003e-13	2.95937e-14	1.63861e-13	1.77411e-14
		19.29	4.04765e-14	8.53502e-15	2.12479e-13	2.5104e-14	1.67214e-13	1.70241e-14
		19.31	4.00927e-14	9.30867e-15	2.16237e-13	2.87886e-14	1.61759e-13	1.61471e-14
		19.33	3.34588e-14	7.1274e-15	2.12307e-13	2.92574e-14	1.69431e-13	2.09419e-14
		19.35	4.06925e-14	6.25393e-15	2.08678e-13	2.62614e-14	1.66433e-13	1.70435e-14
		19.37	4.09075e-14	7.16762e-15	2.12698e-13	2.82245e-14	1.59582e-13	1.64063e-14
		19.39	3.73633e-14	7.15513e-15	2.20228e-13	2.5345e-14	1.6152e-13	1.51237e-14
		19.41	3.7798e-14	7.25781e-15	2.19679e-13	2.78262e-14	1.61879e-13	1.57606e-14
		19.43	4.04006e-14	8.03701e-15	2.15409e-13	2.86626e-14	1.60282e-13	1.67484e-14
		19.45	3.37334e-14	9.67477e-15	2.16404e-13	2.91956e-14	1.68351e-13	1.83981e-14
		19.47	3.37624e-14	7.17212e-15	2.14927e-13	2.86486e-14	1.65836e-13	1.52582e-14
		19.49	3.79053e-14	8.54298e-15	2.11281e-13	2.75379e-14	1.69044e-13	1.66178e-14
		19.51	3.74908e-14	9.52147e-15	2.2021e-13	2.76135e-14	1.68127e-13	1.70015e-14
		19.53	3.2266e-14	4.50479e-15	2.15889e-13	2.71703e-14	1.63866e-13	1.71469e-14
		19.55	3.51805e-14	6.60714e-15	2.18676e-13	2.83241e-14	1.6517e-13	1.65301e-14
		19.57	3.13623e-14	9.10456e-15	2.19894e-13	2.96739e-14	1.74436e-13	1.79917e-14
		19.59	3.07575e-14	5.28126e-15	2.1847e-13	2.57447e-14	1.64378e-13	1.5568e-14
		19.61	3.35281e-14	3.74596e-15	2.19158e-13	2.42386e-14	1.66647e-13	1.42374e-14
		19.63	3.32234e-14	7.98543e-15	2.17601e-13	2.54505e-14	1.64026e-13	1.60013e-14
		19.65	3.30964e-14	4.84412e-15	2.17437e-13	2.57683e-14	1.66489e-13	1.67597e-14
		19.67	2.84177e-14	8.186e-15	2.16622e-13	2.56599e-14	1.58438e-13	1.74962e-14
		19.69	3.40402e-14	5.94485e-15	2.17359e-13	2.70674e-14	1.68148e-13	1.70372e-14
		19.71	3.53579e-14	7.62463e-15	2.17008e-13	2.57062e-14	1.54322e-13	1.45115e-14
		19.73	3.1321e-14	7.70999e-15	2.16556e-13	2.61744e-14	1.6895e-13	1.58691e-14
		19.75	3.78005e-14	1.07421e-14	2.15715e-13	2.53447e-14	1.6257e-13	1.70611e-14
		19.77	2.97614e-14	5.84648e-15	2.18818e-13	2.63802e-14	1.66307e-13	1.55203e-14
		19.79	3.02113e-14	4.74998e-15	2.15174e-13	2.50881e-14	1.67109e-13	1.51042e-14
		19.81	3.42512e-14	6.41355e-15	2.19173e-13	2.68513e-14	1.60115e-13	1.38038e-14
		19.83	2.95623e-14	6.45669e-15	2.16993e-13	2.47992e-14	1.66461e-13	1.45065e-14
		19.85	2.98042e-14	1.01747e-14	2.18804e-13	2.63236e-14	1.65387e-13	1.63635e-14
		19.87	3.71453e-14	9.64853e-15	2.17923e-13	2.48885e-14	1.70066e-13	1.68511e-14
		19.89	3.25934e-14	1.17431e-14	2.18418e-13	2.36028e-14	1.69154e-13	1.60531e-14
		19.91	3.84106e-14	1.42383e-14	2.15828e-13	2.70794e-14	1.68214e-13	1.47054e-14
		19.93	2.79072e-14	6.51003e-15	2.21986e-13	2.69826e-14	1.62602e-13	1.646e-14
		19.95	3.00626e-14	9.66823e-15	2.16421e-13	2.48859e-14	1.55797e-13	1.86415e-14
		19.97	2.56908e-14	6.70621e-15	2.18212e-13	2.53177e-14	1.64929e-13	1.64915e-14
		19.99	3.09212e-14	6.95278e-15	2.17507e-13	2.51759e-14	1.5287e-13	2.12347e-14
		20.01	3.16504e-14	8.54349e-15	2.19092e-13	2.59639e-14	1.71428e-13	1.61775e-14
		20.03	2.98119e-14	9.84116e-15	2.21663e-13	2.60783e-14	1.63223e-13	1.67172e-14
		20.05	3.21439e-14	7.28237e-15	2.20543e-13	2.69358e-14	1.69498e-13	1.64853e-14
		20.07	3.29326e-14	8.0516e-15	2.20638e-13	2.48847e-14	1.64718e-13	1.36691e-14
		20.09	2.97785e-14	8.63602e-15	2.09572e-13	3.04166e-14	1.70131e-13	1.809e-14
		20.11	2.7917e-14	9.83911e-15	2.1766e-13	2.57315e-14	1.6959e-13	1.44565e-14
		20.13	3.06378e-14	8.24217e-15	2.19316e-13	2.59449e-14	1.63799e-13	1.48654e-14
		20.15	3.48311e-14	1.02038e-14	2.1662e-13	2.70123e-14	1.65944e-13	1.54262e-14
		20.17	3.48272e-14	9.68526e-15	2.19447e-13	2.59735e-14	1.6663e-13	1.54292e-14
		20.19	2.26925e-14	6.91359e-15	2.15074e-13	2.84983e-14	1.67356e-13	1.43966e-14
		20.21	3.14972e-14	1.06837e-14	2.18224e-13	2.72298e-14	1.63962e-13	1.51758e-14
		20.23	2.94469e-14	8.45677e-15	2.22438e-13	2.48319e-14	1.73878e-13	1.64694e-14
		20.25	3.16147e-14	8.09763e-15	2.19797e-13	2.6323e-14	1.65604e-13	1.84338e-14
		20.27	2.90724e-14	8.73979e-15	2.2195e-13	2.49581e-14	1.7166e-13	1.62726e-14
		20.29	2.32236e-14	9.70243e-15	2.19757e-13	2.58011e-14	1.61805e-13	1.6304e-14
		20.31	2.43573e-14	5.37749e-15	2.2393e-13	2.71574e-14	1.63133e-13	1.81007e-14
		20.33	3.39782e-14	7.88426e-15	2.18094e-13	2.55821e-14	1.66839e-13	1.73218e-14
		20.35	3.48384e-14	6.66869e-15	2.21163e-13	2.41292e-14	1.64763e-13	1.69435e-14
		20.37	2.88892e-14	5.7269e-15	2.21553e-13	2.66373e-14	1.67457e-13	1.91341e-14
		20.39	2.62705e-14	6.79262e-15	2.22074e-13	2.57443e-14	1.64233e-13	1.92352e-14
		20.41	2.95953e-14	8.62553e-15	2.19714e-13	2.56602e-14	1.66181e-13	1.62482e-14
		20.43	2.70945e-14	6.12551e-15	2.20019e-13	2.73232e-14	1.64689e-13	1.97259e-14
		20.45	2.7916e-14	1.11356e-14	2.23936e-13	2.63351e-14	1.65036e-13	1.90858e-14
		20.47	3.14847e-14	1.16314e-14	2.22255e-13	2.51053e-14	1.63706e-13	1.51602e-14
		20.49	2.48423e-14	7.83142e-15	2.18057e-13	2.69342e-14	1.55166e-13	1.66464e-14
		20.51	3.2586e-14	9.55113e-15	2.27686e-13	2.73236e-14	1.65089e-13	1.49337e-14
		20.53	2.91044e-14	6.7418e-15	2.23913e-13	2.687e-14	1.58732e-13	1.89243e-14
		20.55	2.98795e-14	8.21394e-15	2.21138e-13	2.68502e-14	1.65432e-13	1.81803e-14
		20.57	3.24812e-14	9.83547e-15	2.19419e-13	2.49433e-14	1.60529e-13	1.6795e-14
		20.59	2.91749e-14	8.01983e-15	2.25391e-13	2.71589e-14	1.61412e-13	1.69036e-14
		20.61	2.66399e-14	7.60686e-15	2.20776e-13	2.5236e-14	1.63568e-13	1.80421e-14
		20.63	2.76578e-14	8.27902e-15	2.18643e-13	2.67028e-14	1.64058e-13	1.7625e-14
		20.65	3.16607e-14	6.48083e-15	2.20209e-13	2.61341e-14	1.69937e-13	1.75519e-14
		20.67	2.85824e-14	1.05241e-14	2.21701e-13	2.76367e-14	1.6856e-13	1.46343e-14
		20.69	2.36241e-14	7.77883e-15	2.29329e-13	2.66127e-14	1.67626e-13	1.93667e-14
		20.71	2.6731e-14	1.00593e-14	2.28142e-13	2.84389e-14	1.6131e-13	1.7806e-14
		20.73	2.92152e-14	8.46206e-15	2.23375e-13	2.71108e-14	1.65164e-13	1.52538e-14
		20.75	2.64008e-14	8.18051e-15	2.26593e-13	2.55161e-14	1.6122e-13	1.77339e-14
		20.77	3.22511e-14	1.05892e-14	2.22302e-13	2.47952e-14	1.61204e-13	2.12359e-14
		20.79	2.64375e-14	7.09323e-15	2.23968e-13	2.62038e-14	1.60727e-13	1.782e-14
		20.81	2.98702e-14	9.60754e-15	2.24672e-13	2.56278e-14	1.61128e-13	1.85803e-14
		20.83	2.59656e-14	8.69446e-15	2.23899e-13	2.84292e-14	1.60776e-13	1.45616e-14
		20.85	3.18729e-14	1.13152e-14	2.28535e-13	2.59392e-14	1.68227e-13	1.75906e-14
		20.87	2.92529e-14	1.01149e-14	2.19206e-13	2.74442e-14	1.59212e-13	1.46238e-14
		20.89	2.48546e-14	8.98707e-15	2.23334e-13	2.75708e-14	1.63043e-13	1.7088e-14
		20.91	2.87067e-14	9.05109e-15	2.25318e-13	2.67048e-14	1.63511e-13	1.53793e-14
		20.93	2.99953e-14	1.16567e-14	2.27476e-13	2.62355e-14	1.63122e-13	1.66849e-14
		20.95	2.94243e-14	1.33706e-14	2.2959e-13	2.53842e-14	1.65134e-13	1.23746e-14
		20.97	3.16056e-14	1.02186e-14	2.261e-13	2.62565e-14	1.51231e-13	1.55591e-14
		20.99	2.8995e-14	1.10935e-14	2.27126e-13	2.59626e-14	1.587e-13	1.83662e-14
		21.01	2.7692e-14	9.48085e-15	2.28546e-13	2.75107e-14	1.59079e-13	1.587e-14
		21.03	2.44797e-14	8.22616e-15	2.21571e-13	2.82465e-14	1.59416e-13	1.64792e-14
		21.05	2.50448e-14	1.00351e-14	2.29e-13	2.74216e-14	1.64882e-13	1.66159e-14
		21.07	2.71169e-14	1.10108e-14	2.2867e-13	2.51608e-14	1.57392e-13	1.85577e-14
		21.09	2.8626e-14	1.31667e-14	2.27331e-13	2.56156e-14	1.61464e-13	1.87486e-14
		21.11	3.2621e-14	1.50964e-14	2.28175e-13	2.45614e-14	1.52526e-13	1.74005e-14
		21.13	3.03544e-14	1.13342e-14	2.22698e-13	2.73381e-14	1.566e-13	1.6401e-14
		21.15	3.27788e-14	1.08978e-14	2.2511e-13	2.5923e-14	1.66494e-13	1.75999e-14
		21.17	3.61377e-14	1.47134e-14	2.29343e-13	2.6097e-14	1.62817e-13	1.85462e-14
		21.19	2.22259e-14	7.43754e-15	2.29066e-13	2.35682e-14	1.68114e-13	1.76585e-14
		21.21	2.63826e-14	1.03803e-14	2.3131e-13	2.49567e-14	1.63185e-13	1.82648e-14
		21.23	3.41395e-14	1.37289e-14	2.30249e-13	2.59887e-14	1.62936e-13	1.52608e-14
		21.25	2.77608e-14	1.09847e-14	2.25821e-13	2.48083e-14	1.57318e-13	1.79067e-14
		21.27	2.93247e-14	1.25632e-14	2.28909e-13	2.62184e-14	1.62416e-13	1.86233e-14
		21.29	3.34189e-14	1.15178e-14	2.29406e-13	2.5733e-14	1.63184e-13	1.64975e-14
		21.31	2.95661e-14	1.25468e-14	2.25779e-13	2.4341e-14	1.67882e-13	1.91048e-14
		21.33	2.77144e-14	1.083e-14	2.23612e-13	2.49191e-14	1.61683e-13	1.92206e-14
		21.35	2.11002e-14	8.53367e-15	2.29139e-13	2.49519e-14	1.62173e-13	2.09163e-14
		21.37	2.92914e-14	1.31775e-14	2.29009e-13	2.59118e-14	1.64273e-13	1.70356e-14
		21.39	2.88958e-14	1.11053e-14	2.24123e-13	2.45653e-14	1.58272e-13	2.02496e-14
		21.41	2.66308e-14	8.93693e-15	2.33705e-13	2.47026e-14	1.67548e-13	2.18508e-14
		21.43	2.67559e-14	1.03621e-14	2.2882e-13	2.40742e-14	1.69433e-13	1.84741e-14
		21.45	2.62083e-14	1.06094e-14	2.30593e-13	2.46048e-14	1.61906e-13	1.75439e-14
		21.47	3.74344e-14	1.27226e-14	2.28379e-13	2.43188e-14	1.63415e-13	1.78313e-14
		21.49	2.7578e-14	1.11256e-14	2.28285e-13	2.65427e-14	1.71721e-13	1.97253e-14
		21.51	3.1695e-14	1.22206e-14	2.2472e-13	2.47132e-14	1.70095e-13	2.12906e-14
		21.53	2.95287e-14	1.053e-14	2.24846e-13	2.49749e-14	1.6367e-13	1.71904e-14
		21.55	2.22335e-14	9.96272e-15	2.25648e-13	2.53538e-14	1.62458e-13	1.89229e-14
		21.57	2.55183e-14	1.19947e-14	2.31185e-13	2.31338e-14	1.63561e-13	1.77067e-14
		21.59	2.59177e-14	1.05206e-14	2.32516e-13	2.43968e-14	1.64186e-13	1.84671e-14
		21.61	2.78176e-14	8.2244e-15	2.33765e-13	2.73183e-14	1.66816e-13	1.81106e-14
		21.63	2.67753e-14	1.11599e-14	2.288e-13	2.71597e-14	1.68128e-13	2.1347e-14
		21.65	2.53329e-14	9.64984e-15	2.34895e-13	2.88649e-14	1.69949e-13	1.58713e-14
		21.67	2.87842e-14	1.18873e-14	2.35502e-13	2.48011e-14	1.66051e-13	2.04111e-14
		21.69	2.91738e-14	1.07305e-14	2.36288e-13	2.57391e-14	1.64144e-13	1.69199e-14
		21.71	2.4956e-14	9.36897e-15	2.35697e-13	2.44217e-14	1.69451e-13	2.08269e-14
		21.73	3.02089e-14	1.22167e-14	2.32581e-13	2.38803e-14	1.63152e-13	1.77906e-14
		21.75	2.93005e-14	9.99991e-15	2.2697e-13	2.81301e-14	1.72412e-13	1.80399e-14
		21.77	2.63215e-14	1.10098e-14	2.33353e-13	2.35975e-14	1.68368e-13	1.92392e-14
		21.79	3.52858e-14	1.09799e-14	2.30201e-13	2.30584e-14	1.67809e-13	1.65222e-14
		21.81	2.81099e-14	1.13314e-14	2.25174e-13	2.50012e-14	1.63097e-13	1.60618e-14
		21.83	3.22866e-14	1.1691e-14	2.30534e-13	2.70877e-14	1.61925e-13	1.71841e-14
		21.85	2.527e-14	1.05128e-14	2.30554e-13	2.57246e-14	1.68742e-13	1.7529e-14
		21.87	2.53336e-14	9.37668e-15	2.3116e-13	2.73271e-14	1.63216e-13	1.6714e-14
		21.89	3.219e-14	1.51086e-14	2.31054e-13	2.69426e-14	1.59961e-13	1.72783e-14
		21.91	2.87461e-14	1.04423e-14	2.30214e-13	2.44604e-14	1.56337e-13	2.08576e-14
		21.93	2.90436e-14	7.75822e-15	2.31787e-13	2.55334e-14	1.63632e-13	1.91074e-14
		21.95	3.20304e-14	1.15558e-14	2.29088e-13	2.80768e-14	1.60214e-13	2.0779e-14
		21.97	3.01756e-14	1.25844e-14	2.3601e-13	2.5067e-14	1.66768e-13	1.95879e-14
		21.99	3.10361e-14	1.10807e-14	2.30023e-13	2.49869e-14	1.61458e-13	1.48141e-14
		22.01	3.1191e-14	9.62451e-15	2.32453e-13	2.55791e-14	1.65189e-13	1.93639e-14
		22.03	3.13847e-14	1.20846e-14	2.30968e-13	2.58117e-14	1.72943e-13	1.95535e-14
		22.05	2.71178e-14	1.03306e-14	2.29305e-13	2.97482e-14	1.69338e-13	1.81573e-14
		22.07	3.10097e-14	8.99211e-15	2.33263e-13	3.01078e-14	1.70663e-13	1.78108e-14
		22.09	2.49598e-14	8.89797e-15	2.32982e-13	2.75977e-14	1.65764e-13	1.82305e-14
		22.11	2.59342e-14	9.39282e-15	2.30661e-13	2.69077e-14	1.70432e-13	1.9277e-14
		22.13	2.98412e-14	8.22551e-15	2.3314e-13	2.59631e-14	1.66161e-13	2.08269e-14
		22.15	2.32463e-14	9.94322e-15	2.31269e-13	2.77391e-14	1.61227e-13	1.8415e-14
		22.17	2.64205e-14	9.16697e-15	2.32054e-13	2.52772e-14	1.57633e-13	1.87209e-14
		22.19	3.27581e-14	1.17623e-14	2.32099e-13	2.65454e-14	1.57905e-13	1.93326e-14
		22.21	2.48657e-14	9.52669e-15	2.2768e-13	2.81803e-14	1.5557e-13	1.92564e-14
		22.23	2.50291e-14	1.14473e-14	2.30135e-13	2.69884e-14	1.63075e-13	1.88045e-14
		22.25	2.2793e-14	9.99693e-15	2.25708e-13	2.82704e-14	1.64485e-13	1.78754e-14
		22.27	2.21377e-14	1.02263e-14	2.32381e-13	2.70465e-14	1.57018e-13	1.71263e-14
		22.29	2.42747e-14	1.07107e-14	2.31028e-13	2.46544e-14	1.52466e-13	1.91188e-14
		22.31	1.40422e-14	7.10961e-15	2.32698e-13	2.65837e-14	1.64896e-13	1.88258e-14
		22.33	2.44498e-14	8.32167e-15	2.33067e-13	2.57943e-14	1.616e-13	1.7168e-14
		22.35	2.5706e-14	9.8528e-15	2.29989e-13	2.80173e-14	1.62188e-13	1.74187e-14
		22.37	2.38467e-14	9.35868e-15	2.33788e-13	2.67636e-14	1.64405e-13	1.86788e-14
		22.39	2.21964e-14	5.85046e-15	2.32744e-13	2.77624e-14	1.61803e-13	1.76486e-14
		22.41	2.75955e-14	9.65629e-15	2.26618e-13	2.79021e-14	1.69262e-13	2.08008e-14
		22.43	2.33127e-14	8.18062e-15	2.31467e-13	2.74448e-14	1.5782e-13	1.98466e-14
		22.45	2.79142e-14	1.43038e-14	2.28557e-13	2.7418e-14	1.6073e-13	1.7114e-14
		22.47	2.00513e-14	7.29581e-15	2.38713e-13	2.54597e-14	1.64608e-13	1.9271e-14
		22.49	1.97943e-14	1.10915e-14	2.30566e-13	2.68789e-14	1.65425e-13	2.24681e-14
		22.51	2.28584e-14	9.30498e-15	2.28422e-13	2.50838e-14	1.56533e-13	1.94897e-14
		22.53	2.60736e-14	9.59611e-15	2.31548e-13	2.56183e-14	1.61831e-13	2.24667e-14
		22.55	1.66034e-14	9.33103e-15	2.28926e-13	2.80105e-14	1.63192e-13	1.9601e-14
		22.57	1.97308e-14	7.71527e-15	2.33895e-13	2.55109e-14	1.61961e-13	1.74822e-14
		22.59	2.24574e-14	9.74573e-15	2.2859e-13	2.76146e-14	1.6022e-13	1.67977e-14
		22.61	2.04344e-14	1.37397e-14	2.30744e-13	2.72976e-14	1.60733e-13	1.7974e-14
		22.63	1.89207e-14	1.11674e-14	2.3183e-13	2.76302e-14	1.60393e-13	2.03961e-14
		22.65	1.6262e-14	7.46343e-15	2.31905e-13	2.71235e-14	1.6129e-13	1.54257e-14
		22.67	1.68273e-14	9.35501e-15	2.30176e-13	2.81372e-14	1.61007e-13	1.67294e-14
		22.69	2.04387e-14	1.00819e-14	2.3613e-13	2.64355e-14	1.65421e-13	1.57903e-14
		22.71	1.61519e-14	9.01506e-15	2.36253e-13	2.55199e-14	1.68604e-13	1.80685e-14
		22.73	2.35076e-14	1.23569e-14	2.37195e-13	2.66808e-14	1.62756e-13	1.62607e-14
		22.75	1.91686e-14	8.98149e-15	2.30576e-13	2.68466e-14	1.6386e-13	1.68158e-14
		22.77	2.03239e-14	1.07868e-14	2.37995e-13	2.7256e-14	1.57739e-13	1.57807e-14
		22.79	1.94347e-14	1.14808e-14	2.33412e-13	2.40549e-14	1.69181e-13	1.88649e-14
		22.81	1.92038e-14	9.91042e-15	2.34795e-13	2.43774e-14	1.60596e-13	1.77016e-14
		22.83	2.32576e-14	1.02557e-14	2.36344e-13	2.41085e-14	1.6066e-13	2.00443e-14
		22.85	1.91269e-14	9.65923e-15	2.29351e-13	2.69512e-14	1.59232e-13	2.01134e-14
		22.87	1.89937e-14	1.36639e-14	2.37042e-13	2.28783e-14	1.6121e-13	1.79569e-14
		22.89	2.50392e-14	1.20812e-14	2.35376e-13	2.64102e-14	1.62919e-13	1.65595e-14
		22.91	2.39544e-14	1.30392e-14	2.36437e-13	2.66288e-14	1.54108e-13	1.75424e-14
		22.93	1.75504e-14	8.2596e-15	2.35671e-13	2.52804e-14	1.54264e-13	1.6006e-14
		22.95	1.48554e-14	9.28492e-15	2.39642e-13	2.89445e-14	1.56709e-13	1.82358e-14
		22.97	1.93793e-14	9.18497e-15	2.41405e-13	2.54785e-14	1.58831e-13	1.74578e-14
		22.99	1.99862e-14	9.35469e-15	2.39924e-13	2.68387e-14	1.66091e-13	1.92339e-14
		23.01	2.15996e-14	9.9852e-15	2.36968e-13	2.56518e-14	1.56476e-13	1.90591e-14
		23.03	1.58836e-14	1.03573e-14	2.38368e-13	2.58304e-14	1.61377e-13	2.03141e-14
		23.05	2.32192e-14	1.37539e-14	2.41656e-13	2.6322e-14	1.66159e-13	1.7709e-14
		23.07	1.60274e-14	1.27932e-14	2.42874e-13	2.54621e-14	1.551e-13	1.527e-14
		23.09	2.50242e-14	1.21284e-14	2.38227e-13	2.86311e-14	1.67167e-13	1.87273e-14
		23.11	1.37712e-14	8.47424e-15	2.41477e-13	2.57779e-14	1.66298e-13	1.53276e-14
		23.13	2.04968e-14	1.00483e-14	2.37854e-13	2.51282e-14	1.60893e-13	1.7983e-14
		23.15	1.173e-14	7.83995e-15	2.37787e-13	2.79851e-14	1.645e-13	1.78725e-14
		23.17	1.54356e-14	7.49743e-15	2.44535e-13	2.78734e-14	1.65023e-13	1.81703e-14
		23.19	1.65394e-14	8.65203e-15	2.48071e-13	2.76112e-14	1.58271e-13	1.67405e-14
		23.21	1.35155e-14	1.05684e-14	2.41832e-13	2.91229e-14	1.61995e-13	1.89206e-14
		23.23	1.81289e-14	9.94288e-15	2.46067e-13	2.54615e-14	1.6037e-13	1.97906e-14
		23.25	1.46687e-14	7.53641e-15	2.41295e-13	2.89196e-14	1.62595e-13	1.91508e-14
		23.27	1.73934e-14	8.99813e-15	2.44488e-13	3.00167e-14	1.67703e-13	1.7654e-14
		23.29	1.47946e-14	9.40697e-15	2.45337e-13	2.82783e-14	1.62127e-13	1.89269e-14
		23.31	1.36174e-14	9.32202e-15	2.43476e-13	2.86905e-14	1.58103e-13	1.82455e-14
		23.33	1.15548e-14	8.61743e-15	2.44678e-13	2.52945e-14	1.62338e-13	1.83943e-14
		23.35	1.73528e-14	8.32448e-15	2.50337e-13	2.84783e-14	1.61195e-13	2.02223e-14
		23.37	1.48126e-14	9.05407e-15	2.46978e-13	2.8615e-14	1.62437e-13	1.75641e-14
		23.39	9.23315e-15	8.75409e-15	2.4171e-13	2.81918e-14	1.61844e-13	1.60716e-14
		23.41	7.76391e-15	7.39531e-15	2.46407e-13	2.97474e-14	1.60154e-13	1.99629e-14
		23.43	1.42006e-14	8.94797e-15	2.47184e-13	2.92029e-14	1.52276e-13	2.03923e-14
		23.45	1.21895e-14	9.41156e-15	2.49423e-13	2.87906e-14	1.55777e-13	2.2973e-14
		23.47	1.03212e-14	1.02617e-14	2.4072e-13	2.76046e-14	1.65058e-13	1.74657e-14
		23.49	5.85964e-15	6.97101e-15	2.46521e-13	2.8034e-14	1.5874e-13	1.89208e-14
		23.51	1.18967e-14	8.63813e-15	2.43203e-13	2.86501e-14	1.60176e-13	2.15468e-14
		23.53	7.35727e-15	8.03848e-15	2.44912e-13	2.79538e-14	1.51898e-13	2.13721e-14
		23.55	6.52278e-15	5.19206e-15	2.48541e-13	2.98601e-14	1.59702e-13	2.27521e-14
		23.57	4.28008e-15	6.21943e-15	2.44907e-13	2.79083e-14	1.52996e-13	2.17105e-14
		23.59	1.09053e-14	7.38231e-15	2.43265e-13	2.95314e-14	1.59904e-13	1.90435e-14
		23.61	7.10626e-15	4.94461e-15	2.47791e-13	2.63032e-14	1.62691e-13	2.03434e-14
		23.63	1.52118e-14	7.69944e-15	2.4816e-13	2.9302e-14	1.56081e-13	1.85521e-14
		23.65	1.42392e-14	8.20813e-15	2.46038e-13	2.77628e-14	1.57375e-13	2.12067e-14
		23.67	3.87543e-15	5.47584e-15	2.49176e-13	2.95107e-14	1.58312e-13	2.64368e-14
		23.69	1.16238e-14	7.75311e-15	2.48574e-13	2.74208e-14	1.60056e-13	2.11495e-14
		23.71	8.38288e-15	6.82132e-15	2.47835e-13	2.8723e-14	1.59044e-13	2.11728e-14
		23.73	1.25515e-14	9.65321e-15	2.48347e-13	2.67166e-14	1.55925e-13	2.22545e-14
		23.75	1.4001e-14	8.07491e-15	2.48095e-13	2.77762e-14	1.62299e-13	2.00047e-14
		23.77	9.98331e-15	9.58724e-15	2.46671e-13	2.53925e-14	1.60603e-13	2.01678e-14
		23.79	1.20332e-14	5.31806e-15	2.46749e-13	2.80539e-14	1.53782e-13	2.01377e-14
		23.81	1.21444e-14	8.91151e-15	2.5086e-13	2.68232e-14	1.63495e-13	2.03004e-14
		23.83	9.405e-15	6.65883e-15	2.46202e-13	2.83928e-14	1.63775e-13	2.11747e-14
		23.85	5.40872e-15	2.91209e-15	2.48505e-13	2.68691e-14	1.5978e-13	1.83821e-14
		23.87	1.28723e-14	6.96339e-15	2.4423e-13	2.86369e-14	1.61315e-13	1.95596e-14
		23.89	8.31033e-15	7.75684e-15	2.48559e-13	2.76436e-14	1.60717e-13	2.05703e-14
		23.91	1.63488e-14	7.54447e-15	2.49e-13	2.84634e-14	1.55133e-13	1.85524e-14
		23.93	1.0208e-14	5.28595e-15	2.49254e-13	2.83186e-14	1.53387e-13	2.01453e-14
		23.95	9.71111e-15	8.12177e-15	2.50927e-13	2.79367e-14	1.60847e-13	1.86402e-14
		23.97	1.67223e-14	1.00467e-14	2.50263e-13	2.82171e-14	1.5295e-13	1.90715e-14
		23.99	1.4884e-14	6.10987e-15	2.52379e-13	2.90357e-14	1.58439e-13	2.05825e-14
		24.01	1.66171e-14	7.05043e-15	2.45681e-13	2.90714e-14	1.62325e-13	2.07981e-14
		24.03	1.54293e-14	1.34117e-14	2.46427e-13	2.87147e-14	1.59325e-13	1.89803e-14
		24.05	1.34643e-14	7.84766e-15	2.49529e-13	2.60685e-14	1.57813e-13	1.70936e-14
		24.07	1.48499e-14	6.0549e-15	2.4966e-13	3.04112e-14	1.67389e-13	2.1638e-14
		24.09	8.81024e-15	5.05395e-15	2.45591e-13	2.77055e-14	1.63423e-13	1.9722e-14
		24.11	1.13053e-14	7.56089e-15	2.47491e-13	3.05438e-14	1.63728e-13	2.15422e-14
		24.13	1.49001e-14	9.35338e-15	2.46101e-13	2.99415e-14	1.60563e-13	2.33198e-14
		24.15	1.32967e-14	1.19084e-14	2.4615e-13	3.14403e-14	1.57709e-13	1.98774e-14
		24.17	9.65217e-15	6.89679e-15	2.4597e-13	2.90031e-14	1.5607e-13	1.925e-14
		24.19	1.67424e-14	5.82127e-15	2.46091e-13	2.96878e-14	1.56855e-13	1.86674e-14
		24.21	7.51792e-15	8.94587e-15	2.43862e-13	3.23774e-14	1.56465e-13	1.87378e-14
		24.23	1.06599e-14	7.10264e-15	2.44895e-13	2.92084e-14	1.64042e-13	1.7831e-14
		24.25	4.22283e-15	6.7379e-15	2.46274e-13	2.92024e-14	1.62797e-13	2.21865e-14
		24.27	1.27522e-14	9.79686e-15	2.50518e-13	2.79853e-14	1.61984e-13	2.23459e-14
		24.29	2.62387e-15	8.68659e-15	2.48043e-13	2.76648e-14	1.61591e-13	1.98718e-14
		24.31	1.15321e-14	8.85638e-15	2.47817e-13	2.9691e-14	1.62408e-13	2.04679e-14
		24.33	9.36481e-15	6.63465e-15	2.44042e-13	2.78976e-14	1.62976e-13	1.89922e-14
		24.35	7.73799e-15	1.14807e-14	2.46621e-13	2.99991e-14	1.62981e-13	2.04881e-14
		24.37	1.3274e-14	8.88734e-15	2.43365e-13	3.21824e-14	1.68659e-13	2.14382e-14
		24.39	1.09939e-14	7.49531e-15	2.45844e-13	3.07826e-14	1.60705e-13	1.89817e-14
		24.41	1.26511e-14	6.85502e-15	2.42603e-13	3.2406e-14	1.66084e-13	2.08124e-14
		24.43	1.36821e-14	1.33598e-14	2.45601e-13	2.92476e-14	1.66086e-13	1.99847e-14
		24.45	1.49839e-14	1.16309e-14	2.43787e-13	2.95269e-14	1.61359e-13	1.82217e-14
		24.47	1.49983e-14	7.80656e-15	2.3882e-13	2.89581e-14	1.62438e-13	1.90611e-14
		24.49	8.61613e-15	8.94057e-15	2.45917e-13	3.0703e-14	1.54035e-13	1.85873e-14
		24.51	1.44006e-14	1.10862e-14	2.45667e-13	3.12624e-14	1.64062e-13	2.07281e-14
		24.53	2.86254e-15	1.07105e-14	2.42479e-13	3.2347e-14	1.62985e-13	1.91721e-14
		24.55	1.28004e-14	1.22216e-14	2.44445e-13	3.0383e-14	1.61921e-13	1.99824e-14
		24.57	5.57669e-15	9.92945e-15	2.40336e-13	3.00131e-14	1.5981e-13	2.02257e-14
		24.59	8.51381e-15	8.70111e-15	2.47969e-13	2.99016e-14	1.59694e-13	1.94858e-14
		24.61	1.44493e-14	8.8369e-15	2.41956e-13	3.29663e-14	1.64621e-13	2.37654e-14
		24.63	1.58726e-14	1.35122e-14	2.45603e-13	3.21549e-14	1.68161e-13	1.94785e-14
		24.65	1.12237e-14	8.78227e-15	2.44464e-13	3.07619e-14	1.60565e-13	1.83608e-14
		24.67	1.2047e-14	9.67717e-15	2.40774e-13	3.28028e-14	1.66008e-13	2.04902e-14
		24.69	8.36229e-15	8.51107e-15	2.43222e-13	3.27656e-14	1.63669e-13	2.62217e-14
		24.71	8.90531e-15	1.03648e-14	2.42339e-13	3.02103e-14	1.59814e-13	1.81441e-14
		24.73	7.01782e-15	9.74172e-15	2.42754e-13	3.20881e-14	1.62624e-13	2.05579e-14
		24.75	4.19439e-15	8.9402e-15	2.41733e-13	3.16022e-14	1.63547e-13	1.82161e-14
		24.77	6.25629e-15	9.32234e-15	2.4322e-13	3.19545e-14	1.57325e-13	1.92847e-14
		24.79	3.90365e-15	1.06907e-14	2.42445e-13	3.02413e-14	1.62859e-13	2.1436e-14
		24.81	6.59754e-15	1.06754e-14	2.42522e-13	3.07314e-14	1.63547e-13	1.94462e-14
		24.83	5.68893e-15	7.73523e-15	2.42154e-13	3.23589e-14	1.667e-13	1.99727e-14
		24.85	-6.74407e-16	8.35273e-15	2.41399e-13	3.25318e-14	1.61214e-13	2.17671e-14
		24.87	8.51628e-15	9.61186e-15	2.42755e-13	3.1204e-14	1.65484e-13	2.16908e-14
		24.89	1.07084e-14	1.03963e-14	2.47843e-13	3.15566e-14	1.62692e-13	1.9026e-14
		24.91	-1.28784e-17	9.49411e-15	2.44811e-13	3.15314e-14	1.58426e-13	2.10226e-14
		24.93	5.25613e-15	9.8472e-15	2.42817e-13	3.17594e-14	1.62456e-13	1.83944e-14
		24.95	8.08763e-15	1.20033e-14	2.44406e-13	3.34278e-14	1.599e-13	2.15181e-14
		24.97	4.33556e-15	1.27318e-14	2.41054e-13	3.3105e-14	1.6167e-13	2.03941e-14
		24.99	4.86206e-15	1.39403e-14	2.43771e-13	3.13917e-14	1.62797e-13	1.88859e-14
		25.01	4.7899e-15	1.03582e-14	2.41474e-13	3.40263e-14	1.60975e-13	2.07106e-14
		25.03	5.67445e-15	1.58844e-14	2.40648e-13	3.29517e-14	1.64179e-13	2.25098e-14
		25.05	6.33809e-15	9.2501e-15	2.40206e-13	3.36463e-14	1.6353e-13	2.43566e-14
		25.07	4.36454e-15	5.03331e-15	2.4492e-13	3.16839e-14	1.59604e-13	2.22346e-14
		25.09	1.11596e-14	1.09101e-14	2.4465e-13	3.28778e-14	1.57547e-13	2.03121e-14
		25.11	5.17407e-15	1.25278e-14	2.46768e-13	3.18605e-14	1.68687e-13	1.90974e-14
		25.13	1.56405e-15	1.04692e-14	2.43335e-13	3.35374e-14	1.63715e-13	2.05062e-14
		25.15	4.60647e-15	1.00579e-14	2.45871e-13	3.31981e-14	1.58258e-13	1.764e-14
		25.17	3.95e-15	1.06647e-14	2.45889e-13	3.42568e-14	1.6777e-13	1.97354e-14
		25.19	6.58138e-15	1.11663e-14	2.47371e-13	3.19408e-14	1.56664e-13	2.01885e-14
		25.21	1.07893e-15	6.65893e-15	2.39935e-13	3.41104e-14	1.61353e-13	2.16387e-14
		25.23	6.87227e-15	1.18955e-14	2.43523e-13	3.55526e-14	1.59329e-13	2.0308e-14
		25.25	4.68271e-15	1.16055e-14	2.4249e-13	3.52184e-14	1.58547e-13	2.23842e-14
		25.27	8.37741e-15	1.15765e-14	2.39964e-13	3.37938e-14	1.5969e-13	1.74192e-14
		25.29	5.32715e-15	1.2371e-14	2.38965e-13	3.50115e-14	1.60612e-13	2.00583e-14
		25.31	4.44613e-15	8.67108e-15	2.46252e-13	3.36356e-14	1.60756e-13	1.96921e-14
		25.33	5.18052e-15	1.16443e-14	2.42035e-13	3.34174e-14	1.6066e-13	1.95856e-14
		25.35	2.94097e-15	1.22699e-14	2.46083e-13	3.39399e-14	1.66376e-13	2.25663e-14
		25.37	3.12469e-15	7.46996e-15	2.42526e-13	3.31639e-14	1.63471e-13	2.18506e-14
		25.39	1.33275e-15	1.0888e-14	2.44822e-13	3.51987e-14	1.59864e-13	2.07304e-14
		25.41	5.36294e-15	6.43268e-15	2.45385e-13	3.26442e-14	1.63522e-13	2.15605e-14

## Sheet: 20 ms x 15_1 Hz
		Figure 1B_Cm traces								Figure 1B_endo rate vs stimulation								Figure 1B_1Hz_endo Rate (#12-15)_bar graph data
		Time (S)	Control		Dynasore		Pitstop-2			Stimulation (#)	Control		Dynasore		Pitstop-2				Control	Dynasore	Pitstop-2
			Mean	SEM	Mean	SEM	Mean	SEM			Mean	SEM	Mean	SEM	Mean	SEM		Average	2.51e-13	1.21e-13	1.33e-13
																		SEM	2.83e-14	1.91e-14	1.56e-14
		0.01	-1.44127e-14	1.58993e-14	-5.7673e-15	7.86132e-15	-5.42301e-15	5.60043e-15		1	3.34028e-14	1.3084e-14	5.77093e-14	1.3855e-14	3.00718e-14	1.45261e-14		n-number	6	6	5
		0.03	-1.55127e-14	1.49361e-14	-5.85344e-15	6.15244e-15	-7.46321e-15	3.95015e-15		2	8.80248e-14	3.02164e-14	5.29673e-14	1.396e-14	4.70461e-14	7.7746e-15		p-value	-	0.0045	0.007
		0.05	-1.65276e-14	1.42985e-14	-8.27504e-15	9.26722e-15	-6.28878e-15	3.28803e-15		3	1.22724e-13	2.68595e-14	7.80132e-14	2.16233e-14	8.18191e-14	1.17667e-14
		0.07	-1.31875e-14	1.53443e-14	1.63039e-15	5.40446e-15	-4.59845e-15	4.08356e-15		4	1.383e-13	2.16084e-14	8.14775e-14	1.77036e-14	8.08359e-14	1.40415e-14
		0.09	-1.63597e-14	1.51564e-14	-2.5426e-15	6.02349e-15	-9.59877e-15	6.67099e-15		5	1.71628e-13	2.8921e-14	8.89544e-14	1.90023e-14	9.09676e-14	1.21401e-14
		0.11	-1.45127e-14	1.32527e-14	-2.24622e-15	5.05259e-15	-7.73124e-15	7.2922e-15		6	1.68912e-13	3.04438e-14	1.04179e-13	1.51403e-14	9.85653e-14	9.47425e-15
		0.13	-1.43899e-14	1.59801e-14	-7.7673e-15	5.62298e-15	-7.26301e-15	3.68119e-15		7	2.06175e-13	2.40631e-14	9.8297e-14	1.88168e-14	1.03023e-13	2.16477e-14
		0.15	-1.1436e-14	1.71419e-14	1.37489e-15	5.29893e-15	-3.17206e-15	4.79467e-15		8	2.17521e-13	2.41548e-14	1.09762e-13	1.30206e-14	1.1767e-13	9.02952e-15
		0.17	-1.64151e-14	1.47417e-14	-1.27491e-14	7.46508e-15	-1.03446e-14	8.37113e-15		9	2.15813e-13	2.87829e-14	1.07894e-13	1.69294e-14	1.16132e-13	1.62062e-14
		0.19	-1.49016e-14	1.45414e-14	-3.1342e-15	5.74035e-15	-5.50346e-15	6.8622e-15		10	2.4076e-13	2.35934e-14	1.09445e-13	1.58013e-14	1.2645e-13	1.45646e-14
		0.21	-1.19354e-14	1.53621e-14	-9.19147e-15	8.70292e-15	-8.17965e-15	6.37709e-15		11	2.33253e-13	3.57457e-14	1.263e-13	3.03814e-14	1.26382e-13	1.2503e-14
		0.23	-1.69056e-14	1.43259e-14	-4.29461e-15	6.4531e-15	-5.6907e-15	8.07588e-15		12	2.58891e-13	2.5963e-14	1.32842e-13	2.73661e-14	1.32785e-13	2.80043e-14
		0.25	-1.98588e-14	1.31853e-14	-6.66537e-15	6.94903e-15	-7.52323e-15	1.0194e-14		13	2.48155e-13	2.99232e-14	1.18159e-13	1.68777e-14	1.34563e-13	1.46315e-14
		0.27	-1.35975e-14	1.58067e-14	-2.24842e-15	5.40643e-15	-5.58119e-15	9.10777e-15		14	2.61051e-13	3.76162e-14	1.2143e-13	1.86719e-14	1.39264e-13	1.47254e-14
		0.29	-1.27182e-14	1.51204e-14	-4.05385e-15	3.51254e-15	-6.63576e-15	5.32779e-15		15	2.64782e-13	2.70374e-14	1.13295e-13	1.90957e-14	1.2708e-13	1.37916e-14
		0.31	-1.6472e-14	1.30956e-14	-2.76194e-15	4.24948e-15	-5.88526e-15	6.61497e-15
		0.33	-1.77131e-14	1.41081e-14	-1.25204e-15	5.07914e-15	-8.85764e-16	2.86086e-15
		0.35	-1.70576e-14	1.41642e-14	-4.20357e-15	3.51478e-15	-1.53184e-15	7.29444e-15
		0.37	-1.79687e-14	1.19531e-14	-2.72206e-15	3.45133e-15	-3.96429e-15	5.36423e-15
		0.39	-2.05763e-14	1.2035e-14	-7.74723e-15	5.67711e-15	1.13404e-15	5.4364e-15
		0.41	-2.06466e-14	1.30062e-14	4.85398e-16	2.75714e-15	4.31333e-16	8.71191e-15
		0.43	-1.41578e-14	1.41547e-14	1.08025e-15	2.63063e-15	-5.92064e-15	6.27528e-15
		0.45	-1.1752e-14	1.42271e-14	-1.24695e-15	4.38087e-15	7.38429e-15	3.74101e-15
		0.47	-1.2507e-14	1.19725e-14	-7.69559e-16	3.92896e-15	-1.7813e-15	8.74213e-15
		0.49	-9.0243e-15	1.43105e-14	-1.9804e-15	7.16023e-15	-4.77165e-15	5.32324e-15
		0.51	-1.2983e-14	1.41754e-14	-3.06975e-15	7.96076e-15	-1.33259e-15	6.89666e-15
		0.53	-1.54344e-14	1.23562e-14	-3.66866e-15	5.8918e-15	-2.47666e-15	1.0124e-14
		0.55	-1.54457e-14	1.29667e-14	-3.18748e-15	6.88475e-15	-1.01806e-15	7.61373e-15
		0.57	-9.66858e-15	1.40661e-14	-9.26738e-15	8.4672e-15	1.79145e-15	7.32379e-15
		0.59	-1.51772e-14	1.08665e-14	-4.95085e-16	3.90626e-15	-4.70491e-15	7.76553e-15
		0.61	-7.60162e-15	1.49421e-14	-3.4114e-15	5.09569e-15	-1.47485e-15	6.92675e-15
		0.63	-5.57424e-15	1.37986e-14	-5.22513e-15	7.24947e-15	-2.97783e-15	7.62768e-15
		0.65	-1.26142e-14	1.20609e-14	-7.66018e-15	8.57796e-15	-2.01808e-15	7.13375e-15
		0.67	-1.42223e-14	1.3089e-14	2.18043e-15	4.90843e-15	-3.90227e-15	9.5251e-15
		0.69	-1.17636e-14	1.26614e-14	-1.218e-14	9.56101e-15	-2.29023e-15	7.59853e-15
		0.71	-1.5615e-15	1.84619e-14	-1.10416e-15	3.66039e-15	-4.60158e-15	1.08451e-14
		0.73	-4.88906e-15	1.32084e-14	-3.73793e-15	5.05929e-15	-1.24227e-15	7.97612e-15
		0.75	-1.27709e-14	1.33337e-14	-6.06404e-16	6.02339e-15	2.83159e-15	6.9629e-15
		0.77	-1.01707e-14	1.29157e-14	-1.07632e-14	1.0241e-14	-8.01036e-15	1.00092e-14
		0.79	-1.14177e-14	1.12352e-14	-4.94114e-15	5.73822e-15	-9.36505e-15	1.36166e-14
		0.81	-1.42474e-14	1.03655e-14	-5.41174e-15	2.68863e-15	-4.49858e-15	7.50351e-15
		0.83	-1.27247e-14	1.32327e-14	-9.40074e-15	5.64612e-15	2.33669e-15	6.64827e-15
		0.85	-1.41352e-14	1.00253e-14	-6.89257e-15	6.03211e-15	3.73086e-15	9.98441e-15
		0.87	-1.08435e-14	1.07656e-14	-7.61796e-15	5.84098e-15	-2.45084e-15	1.0178e-14
		0.89	-4.67629e-15	1.56911e-14	-2.96286e-16	4.28806e-15	1.71809e-15	8.89615e-15
		0.91	-6.94982e-15	1.37802e-14	-1.01613e-15	4.66178e-15	8.21073e-15	8.40655e-15
		0.93	-1.4256e-14	1.10227e-14	1.01573e-15	4.44752e-15	5.26886e-15	1.12165e-14
		0.95	-1.70578e-14	1.23442e-14	-7.1155e-15	3.93044e-15	6.94784e-15	8.56846e-15
		0.97	-1.52953e-14	9.81988e-15	-5.15782e-15	3.49231e-15	-1.99304e-15	6.86288e-15
		0.99	-8.14137e-15	1.35341e-14	-1.2033e-14	5.07563e-15	4.9302e-15	6.20471e-15
		1.01	-1.01079e-14	1.13271e-14	-5.49882e-15	3.70823e-15	5.64899e-15	5.12966e-15
		1.03	-6.82786e-15	1.13507e-14	-2.94618e-15	6.60212e-15	3.52858e-15	6.1741e-15
		1.05	-1.06006e-14	1.14322e-14	-4.19924e-16	3.77658e-15	9.67555e-16	9.21258e-15
		1.07	-1.00714e-14	1.35268e-14	-6.20442e-15	4.13037e-15	2.96499e-15	5.39346e-15
		1.09	-1.20139e-14	1.08951e-14	-1.88083e-15	3.35126e-15	9.39308e-15	5.59689e-15
		1.11	-6.58366e-15	1.23395e-14	5.42916e-15	4.61479e-15	8.93015e-15	5.58134e-15
		1.13	-1.42607e-14	1.08895e-14	6.86581e-16	6.9702e-15	2.14937e-15	8.28476e-15
		1.15	-1.51354e-14	1.00525e-14	-2.30879e-15	8.78661e-15	4.88339e-15	5.30124e-15
		1.17	-1.18484e-14	1.18586e-14	-2.98205e-15	8.73047e-15	8.34582e-15	7.29861e-15
		1.19	-1.70159e-14	1.20902e-14	3.41461e-15	6.10974e-15	7.87282e-15	7.09381e-15
		1.21	-9.87373e-15	1.20232e-14	-3.82008e-15	8.42196e-15	2.30009e-15	4.99385e-15
		1.23	-1.07029e-14	1.04589e-14	-6.66887e-15	9.73892e-15	2.83382e-15	4.153e-15
		1.25	-9.83329e-15	1.11405e-14	1.69477e-15	6.6246e-15	6.75176e-15	5.04605e-15
		1.27	-7.60068e-15	1.13944e-14	-5.99027e-15	1.27646e-14	1.04008e-14	5.9353e-15
		1.29	-1.31047e-14	1.01471e-14	-5.53608e-16	6.66854e-15	3.81034e-16	4.67648e-15
		1.31	-1.18797e-14	1.05127e-14	3.86395e-15	8.23266e-15	1.04984e-14	5.83883e-15
		1.33	-8.04234e-15	1.2374e-14	-8.23104e-15	1.00937e-14	-7.71361e-16	6.16724e-15
		1.35	-1.20999e-14	1.02585e-14	-1.50272e-15	9.02659e-15	1.34146e-15	5.0701e-15
		1.37	-1.45658e-14	9.97368e-15	-4.46952e-15	8.55254e-15	4.85489e-15	4.1264e-15
		1.39	-1.21276e-14	9.6273e-15	-2.55305e-15	7.97901e-15	3.99262e-15	6.1457e-15
		1.41	-9.07244e-15	1.41896e-14	-2.65637e-15	4.72239e-15	1.90664e-15	5.14886e-15
		1.43	-1.19186e-14	1.17042e-14	-4.14649e-15	8.45071e-15	3.34159e-16	3.84044e-15
		1.45	-1.47407e-14	1.16527e-14	-6.04356e-15	6.36814e-15	7.69021e-15	4.45968e-15
		1.47	-1.07661e-14	1.18046e-14	-7.32405e-16	3.45801e-15	3.765e-15	4.00918e-15
		1.49	-1.057e-14	1.11979e-14	-3.9056e-15	4.10856e-15	2.85513e-15	5.4583e-15
		1.51	-8.4164e-15	1.15125e-14	-9.75267e-15	8.21154e-15	5.22048e-16	8.72284e-15
		1.53	-1.11708e-14	1.1567e-14	-6.03673e-15	6.01198e-15	2.69615e-15	3.90474e-15
		1.55	-1.42961e-14	1.07554e-14	-7.83578e-15	4.65746e-15	1.50927e-15	4.16739e-15
		1.57	-1.21079e-14	1.11579e-14	-7.94326e-15	4.57262e-16	2.68279e-15	1.02899e-14
		1.59	-5.6522e-15	1.2813e-14	-7.33694e-15	6.36473e-15	5.11108e-15	7.10393e-15
		1.61	-1.26279e-14	1.14628e-14	-5.24609e-15	9.64039e-16	-7.80802e-16	5.87691e-15
		1.63	-6.93781e-15	1.21348e-14	-1.41205e-14	4.93391e-15	6.2229e-15	5.58619e-15
		1.65	-1.32519e-14	1.11615e-14	-8.36788e-15	3.10148e-15	4.77888e-15	3.49368e-15
		1.67	-1.10804e-14	9.30388e-15	-1.28437e-14	2.93726e-15	3.88873e-15	4.84195e-15
		1.69	-4.45946e-15	1.28906e-14	-9.4837e-15	4.09258e-15	5.18091e-15	3.69627e-15
		1.71	-1.01618e-14	1.43513e-14	-1.58222e-14	3.14904e-15	-1.31374e-16	5.19812e-15
		1.73	-9.60553e-15	1.21561e-14	-2.23237e-15	4.21066e-15	-2.93737e-15	4.24704e-15
		1.75	-1.35728e-14	1.17147e-14	-1.12377e-14	3.90471e-15	6.06797e-15	3.9708e-15
		1.77	-1.36637e-14	8.74243e-15	-8.78324e-15	6.96709e-16	3.80981e-15	3.95888e-15
		1.79	-1.24137e-14	1.16561e-14	-9.04819e-15	3.82944e-15	3.89242e-16	4.47232e-15
		1.81	-1.24417e-14	1.06729e-14	-1.07507e-14	3.72374e-15	-5.15002e-15	6.72578e-15
		1.83	-1.60193e-14	1.24701e-14	-8.64845e-15	4.28975e-15	6.93335e-16	6.5019e-15
		1.85	-9.29523e-15	1.27441e-14	-2.36255e-15	3.68165e-15	-7.73788e-16	9.25542e-15
		1.87	-4.79054e-15	1.25591e-14	-7.88779e-15	3.82628e-15	2.36657e-15	5.89566e-15
		1.89	-6.36342e-15	1.34466e-14	-1.802e-15	5.7785e-15	4.38463e-15	6.39625e-15
		1.91	-6.0246e-15	1.27888e-14	-3.80811e-15	4.87704e-15	7.42897e-15	5.88619e-15
		1.93	2.31827e-15	1.77594e-14	-8.26865e-15	1.69323e-15	-2.86626e-15	6.91322e-15
		1.95	-8.58351e-15	1.16654e-14	-1.84898e-15	3.1005e-15	4.92123e-15	3.36529e-15
		1.97	-3.5517e-15	1.48097e-14	-5.16208e-15	2.93621e-15	3.45694e-15	4.63969e-15
		1.99	-1.55728e-14	9.20663e-15	-2.62664e-15	2.11557e-15	-9.33858e-16	4.47656e-15
		2.01	-9.06862e-15	1.0586e-14	-3.24961e-15	5.00614e-15	7.56409e-16	6.16091e-15
		2.03	-6.18133e-15	1.06099e-14	-4.99168e-15	2.89375e-15	5.82503e-16	7.82765e-15
		2.05	-4.96168e-15	1.27141e-14	-9.07693e-15	1.82506e-15	3.7199e-15	7.17735e-15
		2.07	-1.61484e-14	1.01284e-14	-4.17414e-15	2.35116e-15	3.04205e-15	8.96092e-15
		2.09	-1.35655e-14	1.05042e-14	-1.00736e-14	2.7132e-15	3.90142e-15	9.37177e-15
		2.11	-1.1302e-14	1.08832e-14	-9.99388e-15	4.24006e-15	-1.75429e-15	7.24821e-15
		2.13	-1.43168e-14	1.03014e-14	-5.11879e-15	3.06272e-15	1.15946e-15	1.05737e-14
		2.15	-1.24475e-14	9.51652e-15	-1.47219e-15	7.5196e-15	3.78387e-15	6.86596e-15
		2.17	-1.41919e-14	9.22458e-15	-1.16294e-14	6.1726e-15	8.73018e-15	5.59381e-15
		2.19	-1.61152e-14	8.91536e-15	-4.57455e-15	2.50017e-15	5.53555e-15	6.33567e-15
		2.21	-1.41635e-14	8.03377e-15	-2.01834e-15	9.2695e-15	3.69e-15	6.74308e-15
		2.23	-8.84788e-15	8.61579e-15	-2.1127e-14	6.92433e-15	2.50938e-15	7.05855e-15
		2.25	-1.01095e-14	1.15464e-14	-8.51515e-15	5.03253e-15	-3.98513e-16	6.35152e-15
		2.27	-1.51334e-14	8.9073e-15	-1.02476e-14	2.35723e-15	-1.49937e-15	4.60201e-15
		2.29	-1.47665e-14	9.34339e-15	-9.81433e-15	2.04153e-15	-1.2551e-15	1.12961e-14
		2.31	-9.36856e-15	8.23425e-15	-2.65014e-15	5.35097e-15	3.00721e-15	5.27388e-15
		2.33	-9.20843e-15	8.75963e-15	-4.83624e-15	1.88904e-15	-1.53361e-16	3.31688e-15
		2.35	-1.2531e-14	8.27427e-15	-8.7597e-15	2.49406e-15	5.04143e-15	5.91486e-15
		2.37	-7.04165e-15	1.13861e-14	-6.09789e-15	1.83212e-15	4.67703e-16	8.68616e-15
		2.39	-7.74054e-15	1.00143e-14	-1.14144e-14	2.49409e-15	4.45268e-16	5.52468e-15
		2.41	-9.25216e-15	7.8197e-15	-6.48615e-15	3.29071e-15	4.75981e-15	5.71731e-15
		2.43	-8.63147e-15	9.86828e-15	-1.09619e-14	2.50484e-15	-5.86259e-15	6.24367e-15
		2.45	-1.10376e-14	9.03832e-15	-9.25834e-15	7.14792e-15	1.55943e-15	9.62629e-15
		2.47	-2.76784e-15	1.24551e-14	-6.87914e-15	2.84616e-15	-1.71432e-16	8.41672e-15
		2.49	-1.16226e-14	8.95662e-15	-1.29645e-14	3.1095e-15	-2.52549e-15	7.38462e-15
		2.51	-9.30938e-15	8.65393e-15	-4.48927e-15	1.76066e-15	3.35595e-15	7.99284e-15
		2.53	-1.19577e-14	6.83572e-15	-4.25364e-15	9.54648e-16	-2.94438e-15	7.35414e-15
		2.55	-1.15891e-14	7.65551e-15	-3.22338e-15	1.72999e-15	3.45584e-16	5.55805e-15
		2.57	-7.59154e-15	1.03869e-14	-1.99773e-15	3.99608e-15	2.73103e-15	5.74348e-15
		2.59	-8.61719e-15	7.80354e-15	-5.38899e-15	1.95357e-15	1.36598e-15	2.78464e-15
		2.61	-8.62814e-15	6.94362e-15	-2.5607e-15	2.22698e-15	-5.86863e-15	8.10694e-15
		2.63	-3.41875e-15	7.9207e-15	-5.85581e-15	2.12944e-15	-4.17067e-15	7.49634e-15
		2.65	-4.26755e-15	1.07037e-14	-1.51519e-15	2.43997e-15	-1.4662e-15	5.40661e-15
		2.67	-5.3334e-15	7.99746e-15	-5.36532e-15	3.83303e-15	-4.20873e-16	3.66122e-15
		2.69	-7.18387e-15	8.83055e-15	-1.42879e-14	2.78965e-15	-5.69761e-16	3.09327e-15
		2.71	-3.9323e-15	9.50236e-15	-5.31063e-15	4.94083e-15	4.162e-15	3.96705e-15
		2.73	-4.28553e-15	9.73312e-15	-8.58805e-15	2.601e-15	3.68089e-15	3.55604e-15
		2.75	-1.51235e-15	9.343e-15	-1.2578e-14	3.18449e-15	3.07927e-16	4.9672e-15
		2.77	-5.81993e-15	9.32912e-15	-1.19283e-14	4.4774e-15	-2.24005e-15	5.11558e-15
		2.79	-6.58998e-15	8.73988e-15	-7.82081e-15	4.55613e-15	-3.79419e-15	5.03271e-15
		2.81	-1.45353e-15	1.09346e-14	-4.1609e-15	9.96502e-16	-1.907e-15	3.71036e-15
		2.83	-1.24177e-14	7.63009e-15	-3.15992e-15	4.88667e-15	-4.96561e-15	2.52096e-15
		2.85	-9.90375e-15	8.69071e-15	-1.0417e-14	3.33836e-15	5.63289e-15	3.50719e-15
		2.87	-1.05363e-14	7.36478e-15	-6.74274e-15	3.37268e-15	4.24515e-16	4.86377e-15
		2.89	-5.19492e-15	9.02612e-15	-4.38002e-15	1.90796e-15	3.13497e-16	1.98412e-15
		2.91	-6.49958e-15	8.12536e-15	-5.92772e-15	1.57563e-15	1.23519e-15	1.34584e-15
		2.93	-1.12288e-14	7.59464e-15	-2.85176e-15	2.51307e-15	5.54842e-15	2.30018e-15
		2.95	-4.72891e-15	8.91864e-15	-2.62645e-15	7.46754e-15	-6.28951e-15	5.43656e-15
		2.97	-4.27762e-15	1.00946e-14	-2.21791e-15	6.41469e-15	6.64966e-16	5.10316e-15
		2.99	-4.73607e-15	5.8892e-15	-3.02996e-15	3.91334e-15	-1.91556e-15	4.41293e-15
		3.01	-6.79361e-15	9.1475e-15	-7.86684e-15	2.81331e-15	-7.19868e-15	5.54915e-15
		3.03	-1.73436e-15	8.20231e-15	-2.02254e-16	5.08374e-15	1.20165e-16	4.91539e-15
		3.05	-4.97152e-15	8.41508e-15	3.49913e-15	9.86067e-15	-2.00617e-15	1.9229e-15
		3.07	-6.42109e-15	7.80846e-15	3.10781e-15	6.80505e-15	-6.34369e-15	2.73117e-15
		3.09	3.20857e-15	1.33494e-14	-2.57786e-15	3.17876e-15	-3.42759e-15	1.83081e-15
		3.11	-4.19512e-15	9.84989e-15	-4.9543e-15	2.19089e-15	-2.80997e-15	5.98776e-15
		3.13	-8.22336e-15	8.06892e-15	-1.3297e-14	4.23468e-15	-4.43169e-15	6.94889e-15
		3.15	-3.25803e-15	7.06148e-15	-1.02e-14	4.54213e-16	-3.11212e-15	6.40803e-15
		3.17	-3.20478e-15	8.46216e-15	-4.50077e-15	1.83112e-15	-7.46881e-15	2.39063e-15
		3.19	-1.03621e-14	6.714e-15	-4.41891e-15	2.18258e-15	-7.64567e-15	4.83524e-15
		3.21	-3.4833e-15	8.01725e-15	-7.55443e-15	1.57923e-15	-6.82862e-15	5.38614e-15
		3.23	-7.47468e-15	6.69724e-15	-1.01351e-15	3.22248e-15	-7.76941e-15	6.28931e-15
		3.25	-1.02948e-14	9.14706e-15	-1.20423e-14	3.06821e-15	-8.34863e-15	2.62529e-15
		3.27	-6.7013e-15	6.20944e-15	-1.27305e-14	6.62985e-15	-4.1271e-15	3.67955e-15
		3.29	-9.63307e-15	7.14146e-15	-6.74523e-15	4.44672e-15	-1.87249e-15	2.12439e-15
		3.31	-7.44119e-15	6.2841e-15	-4.26856e-15	3.94898e-15	2.84521e-15	3.17786e-15
		3.33	-1.56619e-14	7.909e-15	-6.82136e-15	3.67832e-15	-6.70987e-15	3.89684e-15
		3.35	-7.43388e-15	6.70553e-15	-6.89653e-15	5.70244e-15	-2.84291e-15	3.01772e-15
		3.37	-1.04417e-14	6.89006e-15	-2.77324e-15	5.82877e-15	-4.49992e-15	7.13308e-15
		3.39	-8.43224e-15	7.18913e-15	-3.62249e-15	5.93727e-15	-5.12264e-15	4.53775e-15
		3.41	-1.65809e-14	7.79554e-15	2.6823e-15	4.94486e-15	-1.88359e-15	6.86064e-15
		3.43	-9.88342e-15	7.05228e-15	4.37946e-15	8.93937e-15	2.62526e-15	4.7129e-15
		3.45	-1.04302e-14	6.61162e-15	5.66797e-15	6.42254e-15	4.46264e-16	4.12937e-15
		3.47	1.44188e-15	9.85592e-15	-4.59122e-15	3.84811e-15	1.72427e-15	3.73173e-15
		3.49	-9.46875e-15	6.92928e-15	6.18023e-15	6.59224e-15	2.58199e-15	3.66995e-15
		3.51	-1.0052e-14	5.66808e-15	3.84544e-15	5.17625e-15	5.90104e-16	6.48198e-15
		3.53	-1.44053e-14	6.72752e-15	2.62436e-15	5.10189e-15	1.20731e-15	4.80477e-15
		3.55	-5.93326e-15	5.84208e-15	-1.24629e-15	6.80818e-15	2.2843e-15	4.35481e-15
		3.57	-8.96479e-15	6.31036e-15	4.04389e-15	6.27874e-15	3.55287e-15	5.43031e-15
		3.59	-7.46596e-15	8.06265e-15	-2.92467e-15	6.37741e-15	5.56622e-15	6.25607e-15
		3.61	-7.47024e-15	5.47796e-15	-3.70873e-15	4.54433e-15	-3.29843e-15	7.70451e-15
		3.63	-4.28531e-15	7.06555e-15	-6.69467e-15	6.71135e-15	5.28486e-15	6.28911e-15
		3.65	-1.09459e-14	5.2597e-15	-8.45536e-15	5.32857e-15	-2.13879e-15	6.22199e-15
		3.67	-9.27858e-15	5.59636e-15	1.33274e-15	4.72837e-15	3.5939e-15	5.36268e-15
		3.69	-5.42626e-15	6.22931e-15	3.64889e-15	6.06933e-15	7.45387e-16	5.48282e-15
		3.71	-2.10831e-15	7.56701e-15	-7.99248e-15	3.94597e-15	-7.95716e-16	6.40244e-15
		3.73	-3.19307e-15	7.1075e-15	-1.20939e-14	4.57714e-15	5.50135e-16	3.58833e-15
		3.75	-4.02338e-15	7.32038e-15	-6.06283e-15	2.5014e-15	2.92331e-15	7.02274e-15
		3.77	-3.64894e-15	5.27031e-15	-2.51037e-15	5.77224e-15	2.30761e-15	4.25935e-15
		3.79	-6.79601e-15	6.81465e-15	-2.92873e-15	2.93516e-15	-1.55933e-15	3.8787e-15
		3.81	-3.10198e-15	6.79689e-15	-3.57583e-15	4.78753e-15	-7.37566e-15	7.9084e-15
		3.83	-9.29487e-15	5.75515e-15	2.50293e-15	3.85665e-15	2.20658e-15	4.73083e-15
		3.85	-1.81945e-15	8.30314e-15	-2.87739e-15	3.77978e-15	-4.45107e-15	3.87623e-15
		3.87	-5.29943e-15	6.28271e-15	1.05555e-15	4.44258e-15	1.79455e-15	5.82664e-15
		3.89	-4.71281e-15	7.09718e-15	-2.19847e-15	5.21932e-15	-1.89581e-15	3.76845e-15
		3.91	-4.1687e-15	8.11245e-15	-3.09988e-16	2.60652e-15	-3.75288e-15	4.80537e-15
		3.93	-6.43861e-15	7.26467e-15	-3.55995e-15	2.45706e-15	-4.04064e-15	2.62674e-15
		3.95	1.21282e-15	1.03082e-14	-5.79188e-15	2.51444e-15	-7.05755e-16	3.20271e-15
		3.97	-8.29997e-15	5.52479e-15	-1.60459e-15	3.228e-15	-2.94347e-15	4.25598e-15
		3.99	-6.51879e-15	8.59187e-15	-7.68708e-16	2.69405e-15	-2.80551e-15	1.69161e-15
		4.01	-2.75329e-15	6.10259e-15	1.43604e-15	3.23983e-15	3.39239e-15	4.75698e-15
		4.03	-1.94691e-15	5.7646e-15	-4.50397e-16	2.01347e-15	-2.06693e-15	2.65983e-15
		4.05	-1.32097e-15	8.60521e-15	9.46187e-17	4.28288e-15	-7.35392e-16	2.70551e-15
		4.07	-4.80671e-15	4.00166e-15	-7.91927e-15	8.06923e-15	-2.46645e-15	1.68841e-15
		4.09	-2.72193e-15	3.34607e-15	-5.9687e-15	2.25088e-15	-1.67416e-15	2.52327e-15
		4.11	-3.22762e-15	6.5329e-15	-7.21669e-15	5.0316e-15	-3.38616e-15	1.367e-15
		4.13	-6.4605e-15	4.61432e-15	-4.01287e-15	5.79738e-15	-1.43091e-15	2.50144e-15
		4.15	-8.61201e-15	5.72479e-15	-1.79568e-15	2.40237e-15	3.18067e-15	4.6741e-15
		4.17	-2.3717e-15	4.4056e-15	-1.12989e-14	3.08927e-15	-1.32e-16	3.96713e-15
		4.19	-1.51024e-15	6.16692e-15	1.6952e-15	2.84372e-15	-9.30278e-16	2.10897e-15
		4.21	-1.40541e-16	6.41423e-15	3.89939e-15	3.38237e-15	-5.03904e-15	2.28499e-15
		4.23	-1.05111e-15	3.90919e-15	-2.18167e-15	2.11119e-15	-3.07842e-16	3.12355e-15
		4.25	8.46264e-16	5.34326e-15	-1.96882e-16	4.95133e-15	-3.58245e-16	2.57011e-15
		4.27	-4.28251e-15	5.44592e-15	1.18606e-15	5.15817e-15	1.71353e-15	3.60079e-15
		4.29	5.16256e-15	8.83405e-15	3.87257e-16	4.21366e-15	-9.93063e-15	4.23421e-15
		4.31	-5.47166e-15	5.50402e-15	1.03689e-15	2.37416e-15	-8.04479e-16	2.04771e-15
		4.33	-3.37467e-15	1.57247e-15	-2.18099e-15	4.81612e-15	4.88672e-16	1.88965e-15
		4.35	-7.91511e-15	4.58189e-15	-5.23865e-15	2.80453e-15	-5.27627e-15	3.38039e-15
		4.37	1.8605e-16	3.64986e-15	-3.70817e-15	2.36292e-15	1.53931e-15	1.55173e-15
		4.39	-4.23001e-16	3.39149e-15	-4.7259e-15	2.07644e-15	-5.66746e-15	4.94861e-15
		4.41	9.31537e-16	3.83449e-15	-4.93654e-15	1.75269e-15	3.28372e-15	5.70911e-15
		4.43	-2.53499e-15	2.79447e-15	4.05156e-16	8.24992e-15	-9.40762e-17	2.71556e-15
		4.45	-6.54941e-15	6.48154e-15	1.92692e-15	4.18387e-15	2.19302e-15	2.13562e-15
		4.47	-2.82756e-15	2.93619e-15	-7.43548e-16	1.77886e-15	4.84326e-16	4.01787e-15
		4.49	-6.93193e-16	2.39364e-15	-3.3261e-15	1.63021e-15	3.00695e-15	1.76139e-15
		4.51	-4.57249e-15	4.29919e-15	-4.40286e-15	2.804e-15	-3.39666e-17	2.94237e-15
		4.53	-6.01123e-15	2.87188e-15	-8.74493e-16	2.82616e-15	1.31132e-15	2.66685e-15
		4.55	-6.99699e-15	3.00437e-15	-2.38521e-15	2.50238e-15	2.80339e-15	6.48737e-15
		4.57	-1.38695e-15	3.46658e-15	-1.25687e-15	4.19038e-15	-2.09123e-15	2.80412e-15
		4.59	-5.05755e-15	3.20623e-15	-4.67636e-15	7.58077e-15	-1.92453e-15	1.64474e-15
		4.61	1.85814e-15	4.62212e-15	-1.87756e-15	2.26336e-15	-4.30663e-15	1.51835e-15
		4.63	-2.40703e-16	4.45035e-15	7.45748e-16	2.06149e-15	-9.38117e-16	1.06871e-15
		4.65	-1.04558e-15	3.44757e-15	-4.16633e-16	2.11514e-15	2.42941e-15	3.63024e-15
		4.67	1.42445e-15	5.14879e-15	-1.74088e-15	1.58308e-15	-5.15457e-15	4.8856e-15
		4.69	-8.06475e-15	6.93962e-15	-4.04776e-16	1.87049e-15	-1.25226e-15	5.6168e-15
		4.71	-3.88132e-15	3.35061e-15	1.65104e-15	4.06946e-15	-4.56276e-15	5.45993e-15
		4.73	-4.37947e-16	4.64059e-15	-1.66666e-16	1.83623e-15	4.41198e-15	4.30469e-15
		4.75	-3.18844e-15	3.33241e-15	1.00462e-15	3.24366e-15	-4.53526e-15	1.46068e-15
		4.77	-3.25128e-15	2.02767e-15	2.17026e-15	4.79456e-15	2.87828e-15	2.95023e-15
		4.79	-6.8759e-15	4.13431e-15	-3.14696e-16	7.81911e-16	-6.3768e-15	5.36538e-15
		4.81	-1.0502e-15	2.86754e-15	1.44507e-15	2.24069e-15	-6.65555e-16	2.89967e-15
		4.83	-4.52772e-15	3.70899e-15	-1.48905e-15	3.28525e-15	-2.19613e-15	1.05086e-15
		4.85	-1.42695e-15	2.39032e-15	-3.94963e-15	2.19571e-15	-2.54858e-15	2.119e-15
		4.87	-1.0115e-14	4.48798e-15	-3.45983e-16	1.95037e-15	2.27602e-15	4.1599e-15
		4.89	-7.24282e-15	2.04053e-15	2.57342e-15	3.37466e-15	-3.01679e-15	2.82371e-15
		4.91	-3.01942e-15	3.24922e-15	-2.40788e-16	1.76161e-15	3.06754e-15	5.16612e-15
		4.93	-2.66554e-15	1.79092e-15	-1.54904e-15	2.74213e-15	-3.39291e-15	1.62063e-15
		4.95	-5.79046e-16	2.64399e-15	-9.71947e-16	4.62615e-15	-2.72859e-15	2.00772e-15
		4.97	-1.81936e-15	1.84306e-15	2.18918e-15	4.8733e-15	4.3731e-15	2.80674e-15
		4.99	6.79236e-16	3.22437e-15	1.81586e-15	1.96199e-15	-1.90219e-15	4.71212e-15
		5.01	-2.4074e-15	4.58789e-15	-1.87714e-16	2.29273e-15	3.02777e-15	5.27974e-15
		5.03	-1.82679e-15	1.49497e-15	4.93226e-15	4.95734e-15	4.31998e-15	5.36072e-15
		5.05	2.53744e-15	4.53721e-15	4.19434e-15	2.96642e-15	3.00314e-15	2.17096e-15
		5.07	6.29251e-16	2.41342e-15	2.07255e-15	2.27756e-15	9.28802e-16	2.84452e-15
		5.09	1.3833e-15	3.96236e-15	-2.81461e-15	2.40768e-15	4.0037e-15	2.70917e-15
		5.11	-2.6038e-15	2.10711e-15	2.40112e-15	5.02126e-15	-2.87062e-15	3.23494e-15
		5.13	1.44788e-15	4.15923e-15	6.338e-16	3.1216e-15	5.63529e-16	4.48614e-15
		5.15	-1.24138e-15	2.31869e-15	2.4021e-15	5.49413e-15	-3.16746e-15	3.84416e-15
		5.17	2.58639e-15	1.62628e-15	3.77094e-15	2.1075e-15	-4.87399e-15	5.03973e-15
		5.19	2.08003e-17	3.63464e-15	2.80179e-15	4.63647e-15	3.64607e-16	1.34399e-15
		5.21	-1.70284e-15	1.83458e-15	4.83631e-15	5.03633e-15	-1.97388e-15	4.2539e-15
		5.23	-5.22623e-15	2.37114e-15	4.97337e-15	4.10444e-15	1.19957e-15	2.83699e-15
		5.25	-8.19674e-16	1.62367e-15	5.75994e-15	2.68687e-15	-1.7798e-15	3.92276e-15
		5.27	-4.43971e-15	5.83747e-15	5.57353e-15	2.37378e-15	-3.18206e-15	2.63334e-15
		5.29	-7.39694e-15	6.88883e-15	4.7118e-15	2.95612e-15	-2.86884e-16	4.48927e-15
		5.31	-1.01181e-15	3.2189e-15	1.83261e-15	2.42295e-15	-2.28166e-16	4.50087e-15
		5.33	-3.41259e-15	2.21718e-15	6.0553e-15	5.34501e-15	1.151e-16	5.08039e-15
		5.35	1.55855e-15	3.50905e-15	2.26965e-15	2.58816e-15	1.46708e-15	4.40986e-15
		5.37	-7.69038e-15	5.4867e-15	3.65777e-15	2.40531e-15	-1.79792e-15	2.9189e-15
		5.39	1.41614e-15	3.99249e-15	7.99759e-15	5.24563e-15	-2.14421e-16	4.40866e-15
		5.41	2.70593e-15	5.5992e-15	5.56213e-15	4.31182e-15	2.6462e-15	3.68509e-15
		5.43	-6.66207e-15	2.48828e-15	4.01319e-15	6.26756e-15	7.09772e-15	8.43934e-15
		5.45	-1.00334e-14	5.80012e-15	6.37918e-15	1.73589e-15	-4.76397e-15	3.04042e-15
		5.47	-1.32092e-14	7.22203e-15	4.02774e-15	4.16302e-15	1.85052e-15	2.82294e-15
		5.49	-6.83483e-15	1.64395e-15	3.92211e-15	1.5332e-15	4.43831e-15	4.27871e-15
		5.51	-4.93484e-15	4.73141e-15	-1.70968e-15	4.1035e-15	1.47056e-15	3.82584e-15
		5.53	-8.92306e-15	2.48435e-15	6.4051e-15	3.09174e-15	4.84754e-15	4.55078e-15
		5.55	-1.18432e-14	5.81929e-15	3.47505e-15	1.75599e-15	-4.53872e-16	3.91645e-15
		5.57	-4.54968e-15	3.39331e-15	3.01455e-15	3.63226e-15	2.61804e-15	3.31381e-15
		5.59	-5.84787e-15	2.84176e-15	1.99538e-15	4.00761e-15	2.19817e-15	6.7621e-15
		5.61	-6.75759e-15	5.12375e-15	4.93218e-15	5.92391e-15	3.73074e-15	2.70663e-15
		5.63	-9.79974e-15	5.56432e-15	1.00764e-14	5.97e-15	-4.27861e-15	4.82235e-15
		5.65	-3.64726e-15	4.59043e-15	1.75953e-15	4.68004e-15	7.79623e-15	4.83727e-15
		5.67	-6.82707e-15	7.97083e-15	5.783e-15	4.13246e-15	2.12706e-15	4.2544e-15
		5.69	-1.09089e-14	6.81017e-15	2.75953e-15	6.52222e-15	-2.3069e-16	7.65507e-15
		5.71	-3.94083e-15	2.44391e-15	1.07904e-14	8.22649e-15	1.49909e-15	2.48824e-15
		5.73	-1.07143e-14	4.08562e-15	2.4519e-15	4.99092e-15	7.7989e-16	2.88711e-15
		5.75	-7.77727e-15	5.45133e-15	1.10937e-14	7.09561e-15	4.68697e-15	3.28941e-15
		5.77	-5.07875e-15	3.0618e-15	6.52691e-15	9.06331e-15	3.01681e-15	2.84118e-15
		5.79	-7.03491e-15	2.23645e-15	1.01014e-14	7.05944e-15	5.45208e-15	4.17419e-15
		5.81	1.66724e-15	5.39841e-15	8.42809e-15	5.12089e-15	7.29502e-15	7.09905e-15
		5.83	-5.96387e-15	2.15672e-15	8.94386e-15	5.84011e-15	6.24459e-15	1.86688e-15
		5.85	-8.66716e-15	4.82583e-15	7.08099e-15	3.24999e-15	2.20707e-15	1.11095e-15
		5.87	-1.12705e-14	3.66705e-15	4.95732e-15	3.89766e-15	1.2913e-14	4.64233e-15
		5.89	-4.28355e-15	3.12131e-15	1.01867e-14	6.32159e-15	5.23576e-15	3.5603e-15
		5.91	-6.33174e-15	2.99992e-15	1.32305e-14	9.65055e-15	4.23715e-15	4.27073e-15
		5.93	-8.48856e-16	2.8013e-15	8.03918e-15	7.74976e-15	9.54954e-15	5.17307e-15
		5.95	-5.83968e-15	2.28907e-15	5.896e-15	3.88081e-15	8.10436e-15	4.36e-15
		5.97	-9.47773e-15	6.34756e-15	6.00692e-15	5.90531e-15	7.27397e-15	5.07088e-15
		5.99	-3.68164e-15	2.72014e-15	6.19658e-15	8.49307e-15	4.93021e-15	4.73183e-15
		6.01	-2.02801e-15	2.73802e-15	9.34402e-15	5.13334e-15	2.78073e-15	2.05872e-15
		6.03	-4.56431e-15	2.96777e-15	8.11804e-15	4.93291e-15	5.05351e-15	2.98616e-15
		6.05	-2.11012e-15	3.0779e-15	5.16128e-15	2.57016e-15	9.73661e-15	2.95389e-15
		6.07	-2.63687e-15	3.60865e-15	-3.91279e-16	5.34718e-15	3.39264e-15	3.28062e-15
		6.09	-3.65163e-15	2.86154e-15	8.05408e-15	5.33979e-15	8.30354e-15	5.66566e-15
		6.11	-9.29791e-16	2.30983e-15	2.08085e-15	2.13554e-15	4.57405e-15	4.27393e-15
		6.13	-2.70084e-15	2.82211e-15	6.07839e-15	4.65852e-15	8.98209e-15	5.84278e-15
		6.15	-2.57154e-15	4.68923e-15	6.12716e-15	3.31153e-15	1.30191e-14	6.88428e-15
		6.17	-4.49062e-15	2.03524e-15	6.45598e-15	4.04237e-15	1.37401e-14	4.25741e-15
		6.19	1.52115e-15	3.10329e-15	-1.814e-15	2.88058e-15	7.63039e-15	5.87474e-15
		6.21	-4.45509e-15	3.67012e-15	5.62468e-15	3.15914e-15	7.2783e-15	3.69755e-15
		6.23	3.75788e-17	2.67025e-15	8.89341e-15	9.48223e-15	8.26703e-15	4.71409e-15
		6.25	4.20392e-15	4.5257e-15	4.68703e-15	3.53647e-15	1.37743e-14	7.37055e-15
		6.27	-1.60904e-15	4.96092e-15	2.85675e-15	6.89651e-15	8.14462e-15	6.72777e-15
		6.29	9.73978e-16	3.48596e-15	5.49388e-15	6.37436e-15	8.6465e-15	3.90098e-15
		6.31	1.28277e-15	3.11953e-15	6.69179e-15	3.67589e-15	2.87325e-15	6.45479e-15
		6.33	-4.68727e-15	4.91258e-15	7.69782e-15	6.05855e-15	9.53201e-15	3.9111e-15
		6.35	-3.11161e-15	3.63401e-15	4.43063e-15	7.47057e-15	1.42107e-14	8.8958e-15
		6.37	1.37576e-15	5.49671e-15	1.49469e-15	4.03223e-15	1.31835e-14	6.52609e-15
		6.39	-1.93945e-15	4.36964e-15	4.41466e-15	5.24281e-15	1.11571e-14	6.61252e-15
		6.41	-3.3817e-15	3.23466e-15	9.38734e-15	5.2479e-15	1.64693e-14	5.30215e-15
		6.43	-4.72199e-15	2.31769e-15	5.36214e-15	5.10931e-15	6.66027e-15	3.07646e-15
		6.45	-3.17516e-15	4.17406e-15	8.61512e-15	7.03497e-15	1.19396e-14	6.45175e-15
		6.47	-6.1437e-16	3.19044e-15	1.07351e-14	8.54825e-15	7.85212e-15	4.71937e-15
		6.49	-4.56124e-15	4.6716e-15	-2.16075e-16	2.55006e-15	6.19681e-15	4.45876e-15
		6.51	-4.05756e-15	7.63889e-15	5.51836e-15	6.43705e-15	1.09706e-14	3.90897e-15
		6.53	-6.17867e-15	4.255e-15	3.40807e-15	3.8827e-15	8.0385e-15	4.97144e-15
		6.55	-7.22809e-15	7.79255e-15	2.44711e-15	3.11053e-15	1.06458e-15	4.10274e-15
		6.57	-2.02878e-15	4.24617e-15	9.09127e-15	4.18536e-15	1.26069e-14	5.78029e-15
		6.59	-2.79148e-15	5.37455e-15	4.14032e-15	5.28715e-15	1.17568e-14	4.82122e-15
		6.61	-1.5116e-15	4.12248e-15	4.35712e-16	6.81603e-15	5.26846e-15	3.26136e-15
		6.63	-1.09482e-14	4.24089e-15	1.2827e-14	5.71533e-15	5.98601e-15	5.46296e-15
		6.65	-1.013e-14	7.97545e-15	6.36787e-15	6.08747e-15	3.31344e-15	4.65597e-15
		6.67	-5.54384e-15	4.06858e-15	2.36473e-15	4.63125e-15	5.07427e-15	3.91249e-15
		6.69	1.27063e-15	3.00562e-15	7.44401e-15	7.08762e-15	4.35748e-15	3.65122e-15
		6.71	-2.62324e-15	3.98427e-15	4.84024e-15	4.59695e-15	9.5048e-15	4.68637e-15
		6.73	8.39725e-16	4.1981e-15	2.14251e-15	3.86064e-15	2.90024e-15	2.41944e-15
		6.75	-1.03459e-15	3.37682e-15	1.13967e-14	6.30516e-15	4.48409e-15	5.54611e-15
		6.77	-4.99834e-15	5.03054e-15	5.07484e-15	3.51102e-15	1.20604e-14	5.6374e-15
		6.79	-6.24562e-15	6.38417e-15	-4.41153e-15	3.79391e-15	6.68697e-15	5.44622e-15
		6.81	-4.50282e-15	4.42345e-15	7.67067e-15	6.31277e-15	1.18331e-14	6.14606e-15
		6.83	7.56294e-16	4.22996e-15	6.72001e-15	5.04255e-15	1.20952e-14	5.46545e-15
		6.85	-3.6078e-15	3.12434e-15	7.48319e-15	4.91138e-15	7.36059e-15	3.04232e-15
		6.87	-3.3776e-15	6.14221e-15	4.30177e-15	2.89715e-15	8.15836e-15	3.61954e-15
		6.89	2.36564e-15	5.75037e-15	7.1099e-15	5.98516e-15	1.10455e-14	4.15712e-15
		6.91	9.5067e-16	2.05633e-15	2.95084e-15	1.51106e-15	5.56864e-15	4.29279e-15
		6.93	-3.49986e-15	4.52285e-15	5.52124e-15	5.71925e-15	8.93958e-15	4.73192e-15
		6.95	-2.39836e-15	3.51052e-15	2.99691e-15	3.26362e-15	6.63345e-15	2.26865e-15
		6.97	6.22947e-16	2.81224e-15	7.66045e-15	6.867e-15	6.82101e-15	1.48398e-15
		6.99	-7.71556e-15	6.3252e-15	4.51852e-15	6.61779e-15	6.46142e-15	4.60525e-15
		7.01	-1.17724e-14	1.01769e-14	7.32035e-15	5.24467e-15	8.44137e-15	2.6494e-15
		7.03	3.1335e-15	2.90042e-15	6.72747e-16	2.54391e-15	1.10232e-14	2.8759e-15
		7.05	-5.14465e-15	3.48324e-15	9.04342e-15	7.09958e-15	1.37638e-14	5.15687e-15
		7.07	1.17731e-17	4.37056e-15	9.81742e-15	4.49666e-15	1.48536e-14	3.7707e-15
		7.09	-7.82558e-17	5.84233e-15	2.40331e-15	1.47376e-15	1.46917e-14	4.59203e-15
		7.11	-2.42813e-15	4.41428e-15	1.51197e-15	2.67938e-15	1.52123e-14	5.37711e-15
		7.13	3.78588e-18	5.16178e-15	7.12332e-15	9.76931e-15	5.09081e-15	5.13037e-15
		7.15	6.94144e-17	2.61507e-15	-1.11782e-15	2.41256e-15	1.40034e-14	7.72889e-15
		7.17	-9.8768e-15	6.1498e-15	8.97218e-15	6.22727e-15	1.01362e-14	3.64426e-15
		7.19	1.99911e-15	2.89486e-15	5.52809e-15	4.17615e-15	1.8694e-14	6.84467e-15
		7.21	-2.7371e-15	4.40083e-15	5.20938e-15	7.90868e-15	1.6069e-14	6.47759e-15
		7.23	6.83757e-16	4.19518e-15	7.43669e-15	4.48058e-15	1.18183e-14	4.48461e-15
		7.25	-1.28584e-15	2.69759e-15	9.03244e-15	5.55515e-15	1.33626e-14	3.18624e-15
		7.27	-1.11827e-15	3.44888e-15	1.37369e-15	2.74145e-15	9.80398e-15	4.41371e-15
		7.29	9.5069e-16	5.0914e-15	6.87911e-15	8.43365e-15	5.36673e-15	6.74737e-15
		7.31	-3.38799e-16	3.01799e-15	1.07121e-14	8.03211e-15	1.23071e-14	4.19866e-15
		7.33	8.24838e-16	4.1824e-15	1.26554e-14	1.12738e-14	9.23208e-15	5.34568e-15
		7.35	-2.70978e-15	3.43774e-15	1.3023e-14	6.16559e-15	1.46741e-14	6.41362e-15
		7.37	-4.24002e-15	4.88932e-15	-3.6367e-16	3.90521e-15	1.39856e-14	5.71726e-15
		7.39	-3.51783e-15	5.1082e-15	4.94389e-15	5.5617e-15	1.36533e-14	3.24271e-15
		7.41	-3.22232e-15	3.06335e-15	2.6388e-15	5.98057e-15	9.72517e-15	4.70053e-15
		7.43	-5.05479e-15	4.94442e-15	5.25595e-15	7.24558e-15	8.68398e-15	4.34348e-15
		7.45	2.15706e-15	4.90496e-15	8.8714e-15	6.46043e-15	1.17831e-14	3.96123e-15
		7.47	-2.54278e-15	4.48986e-15	9.04832e-15	6.66786e-15	1.00984e-14	3.79109e-15
		7.49	-2.49955e-15	4.45157e-15	6.97199e-15	5.40896e-15	1.12353e-14	4.26986e-15
		7.51	-1.13694e-15	3.75933e-15	1.03794e-14	5.73145e-15	1.56644e-14	4.21047e-15
		7.53	-4.95674e-15	6.29113e-15	8.48998e-15	6.79051e-15	1.34811e-14	5.37912e-15
		7.55	-6.8712e-16	3.65567e-15	1.01722e-14	7.27325e-15	9.14613e-15	2.99505e-15
		7.57	1.91659e-15	2.90415e-15	1.30687e-14	8.68345e-15	1.18761e-14	4.82066e-15
		7.59	-2.22838e-15	3.53778e-15	1.12332e-14	7.28641e-15	1.19387e-14	3.58997e-15
		7.61	-3.20871e-15	3.40949e-15	1.13124e-14	5.10457e-15	1.44405e-14	6.20305e-15
		7.63	-5.33184e-15	4.2728e-15	1.06902e-14	5.43362e-15	1.24563e-14	5.98448e-15
		7.65	4.68443e-17	4.55541e-15	1.14208e-14	6.96832e-15	1.37824e-14	3.78787e-15
		7.67	-4.79263e-15	3.554e-15	9.30464e-15	4.92443e-15	9.38386e-15	4.11592e-15
		7.69	-1.0428e-15	4.60681e-15	4.81119e-15	6.28918e-15	1.17007e-14	5.03911e-15
		7.71	-2.73663e-15	2.03085e-15	4.18808e-15	5.56482e-15	1.24889e-14	6.52208e-15
		7.73	-2.54821e-15	5.36277e-15	7.84519e-15	6.80948e-15	1.14071e-14	4.59774e-15
		7.75	-3.35064e-15	3.48187e-15	5.00229e-15	4.35654e-15	9.2714e-15	5.41416e-15
		7.77	-2.05037e-15	3.41871e-15	3.3129e-15	2.93815e-15	1.4873e-14	5.74202e-15
		7.79	-8.84947e-16	3.30835e-15	8.23347e-15	4.42368e-15	1.53477e-14	5.42496e-15
		7.81	-8.55981e-15	8.20033e-15	6.42714e-15	7.64994e-15	1.19017e-14	5.33765e-15
		7.83	-1.06454e-15	2.15567e-15	2.89084e-15	7.11127e-15	1.00216e-14	6.05512e-15
		7.85	-9.6628e-15	1.01542e-14	7.43118e-15	4.75766e-15	1.71469e-14	7.00669e-15
		7.87	-9.06902e-15	6.68542e-15	6.65458e-15	7.82309e-15	1.40577e-14	5.98965e-15
		7.89	-9.70043e-15	9.59034e-15	1.50679e-14	9e-15	2.1886e-14	8.4398e-15
		7.91	-1.43323e-14	1.44192e-14	8.67647e-15	7.9387e-15	1.63631e-14	7.39511e-15
		7.93	-1.1392e-14	1.21784e-14	5.73741e-15	6.51833e-15	1.0309e-14	5.82216e-15
		7.95	-1.21795e-14	1.53746e-14	1.20718e-15	4.89345e-15	1.29428e-14	6.32142e-15
		7.97	-1.02678e-14	1.22002e-14	3.70458e-16	4.53242e-15	8.38194e-15	6.19705e-15
		7.99	-1.42216e-14	1.49684e-14	3.1859e-15	5.60323e-15	8.62066e-15	4.91215e-15
		8.01	-1.11784e-14	1.11037e-14	1.03107e-14	6.79307e-15	9.42555e-15	5.54071e-15
		8.03	-6.96536e-15	9.43265e-15	7.48737e-15	4.28571e-15	7.43703e-15	6.19653e-15
		8.05	-1.10037e-14	1.15726e-14	4.75734e-15	4.51132e-15	1.25134e-14	5.85672e-15
		8.07	-1.26127e-14	1.10405e-14	8.03671e-15	5.71889e-15	1.05878e-14	4.81717e-15
		8.09	1.24916e-15	5.01335e-15	1.18455e-14	8.26378e-15	1.10761e-14	5.82961e-15
		8.11	1.86256e-15	2.4227e-15	7.78423e-15	4.44029e-15	1.02602e-14	5.06164e-15
		8.13	1.40034e-15	4.25354e-15	1.51594e-14	8.25111e-15	1.00978e-14	6.76521e-15
		8.15	3.73989e-16	4.99945e-15	5.30784e-15	5.73207e-15	1.01133e-14	5.60965e-15
		8.17	-2.10197e-15	3.10656e-15	9.64559e-15	4.72505e-15	1.2223e-14	5.7982e-15
		8.19	-3.96919e-15	3.03778e-15	5.37053e-15	2.72061e-15	1.58465e-14	8.9564e-15
		8.21	-3.97309e-15	4.07023e-15	6.67204e-15	6.49637e-15	1.1092e-14	7.79206e-15
		8.23	-4.0367e-15	2.84045e-15	4.86129e-15	3.35939e-15	1.0511e-14	6.86736e-15
		8.25	-3.98658e-15	2.4922e-15	8.57829e-15	4.51937e-15	8.90454e-15	5.01935e-15
		8.27	-6.58648e-15	4.80478e-15	-1.66669e-15	5.40728e-15	1.22375e-14	5.98507e-15
		8.29	-2.92667e-15	2.54898e-15	3.2682e-15	3.89533e-15	1.4587e-14	7.80131e-15
		8.31	-3.25217e-15	3.20797e-15	2.68774e-15	4.48184e-15	1.40097e-14	8.68144e-15
		8.33	-5.48905e-15	4.63443e-15	1.25136e-14	4.32019e-15	1.43042e-14	8.26668e-15
		8.35	-7.26117e-15	2.74294e-15	7.09867e-15	4.41406e-15	1.26414e-14	7.30294e-15
		8.37	-9.87925e-15	7.22464e-15	5.01172e-15	2.79401e-15	1.6541e-14	6.28668e-15
		8.39	-8.49001e-15	9.55573e-15	1.14371e-14	6.031e-15	1.11305e-14	7.68914e-15
		8.41	-5.72064e-15	3.49216e-15	8.49802e-15	6.6537e-15	1.34991e-14	5.36599e-15
		8.43	-4.02191e-15	2.40098e-15	1.1064e-14	6.02229e-15	1.02902e-14	4.5424e-15
		8.45	-8.60709e-15	2.60943e-15	7.72708e-15	4.71405e-15	1.12009e-14	7.90541e-15
		8.47	-3.41019e-16	2.34399e-15	6.58333e-15	5.57768e-15	1.81793e-14	7.50391e-15
		8.49	-4.04438e-15	4.13301e-15	6.35344e-15	5.17602e-15	2.01482e-14	8.93358e-15
		8.51	-2.66447e-15	1.57263e-15	1.27886e-14	7.92754e-15	1.30331e-14	1.00632e-14
		8.53	-2.35135e-15	2.1205e-15	9.33386e-15	5.09152e-15	1.20622e-14	4.96737e-15
		8.55	2.3501e-15	2.69763e-15	1.20252e-14	8.99096e-15	1.90276e-14	1.19358e-14
		8.57	2.47061e-15	5.38492e-15	6.63971e-15	6.216e-15	9.58471e-15	7.07461e-15
		8.59	1.39042e-15	3.22321e-15	9.21535e-15	7.14005e-15	1.70274e-14	1.25554e-14
		8.61	-7.55483e-15	7.80821e-15	1.30409e-14	6.24958e-15	1.2482e-14	8.25004e-15
		8.63	-1.42724e-15	2.298e-15	6.8248e-15	7.10179e-15	1.29253e-14	8.66405e-15
		8.65	-7.78227e-15	5.4764e-15	8.19211e-15	6.43914e-15	1.13228e-14	5.22611e-15
		8.67	-1.07871e-14	7.98684e-15	8.10248e-15	6.18092e-15	1.54271e-14	7.53011e-15
		8.69	-6.90039e-15	5.71411e-15	8.96272e-15	8.35378e-15	1.24362e-14	4.0325e-15
		8.71	-8.75015e-15	4.31425e-15	8.21242e-15	5.9721e-15	1.05183e-14	6.78171e-15
		8.73	-1.0867e-14	8.10972e-15	7.12116e-15	8.44897e-15	1.19805e-14	8.92635e-15
		8.75	-1.14088e-14	4.6983e-15	3.84069e-16	6.43867e-15	1.57704e-14	8.37745e-15
		8.77	-1.02648e-14	5.92508e-15	4.40967e-15	8.94796e-15	1.24936e-14	5.89498e-15
		8.79	-9.71173e-15	7.33908e-15	3.79409e-15	6.61802e-15	1.1015e-14	6.32814e-15
		8.81	-1.29166e-14	6.5629e-15	8.5617e-15	5.88071e-15	1.49858e-14	7.43268e-15
		8.83	-1.13242e-14	7.12717e-15	5.96401e-15	5.99511e-15	1.4105e-14	8.3349e-15
		8.85	-1.15286e-14	5.9358e-15	6.83377e-15	9.01842e-15	1.51157e-14	8.3777e-15
		8.87	-1.18491e-14	7.26716e-15	2.90588e-15	6.92538e-15	1.13824e-14	6.93758e-15
		8.89	-1.1407e-14	8.73101e-15	1.26779e-14	1.0083e-14	1.5482e-14	1.02984e-14
		8.91	-6.87261e-15	5.68308e-15	1.22297e-14	5.69744e-15	1.91878e-14	1.06914e-14
		8.93	-1.20697e-14	7.71525e-15	1.01742e-14	7.63368e-15	1.55891e-14	1.13875e-14
		8.95	-1.31267e-14	5.61764e-15	1.19362e-14	1.01915e-14	2.07367e-14	8.16332e-15
		8.97	-1.19277e-14	6.66029e-15	1.4153e-14	9.24947e-15	1.64554e-14	9.90702e-15
		8.99	-1.24789e-14	6.85695e-15	2.62661e-15	6.80383e-15	1.60362e-14	1.11905e-14
		9.01	-1.38594e-14	6.0978e-15	1.08799e-14	9.34056e-15	1.61079e-14	1.18599e-14
		9.03	-9.27249e-15	5.08849e-15	7.95376e-15	8.00298e-15	1.81783e-14	9.66533e-15
		9.05	-1.32874e-14	4.82747e-15	5.84099e-15	6.94399e-15	1.44507e-14	9.75071e-15
		9.07	-1.35297e-14	5.3751e-15	9.32545e-15	7.05033e-15	1.65013e-14	9.45198e-15
		9.09	2.19716e-15	8.64237e-15	1.19736e-14	8.5017e-15	1.6995e-14	9.4872e-15
		9.11	-4.45285e-15	6.64628e-15	6.51239e-15	8.95457e-15	1.1528e-14	9.35635e-15
		9.13	-6.57861e-15	5.50081e-15	5.24644e-15	7.1757e-15	1.15983e-14	1.12539e-14
		9.15	-7.20286e-15	4.29598e-15	7.62934e-15	7.75696e-15	1.23921e-14	9.92201e-15
		9.17	-8.0439e-15	3.97777e-15	1.142e-14	7.97273e-15	1.84467e-14	1.14443e-14
		9.19	-1.09732e-14	4.82509e-15	1.47254e-14	1.1262e-14	1.46897e-14	1.16755e-14
		9.21	-1.02407e-14	4.79952e-15	9.38797e-15	7.32224e-15	1.41673e-14	1.22363e-14
		9.23	-1.13384e-14	6.51559e-15	4.46547e-15	6.55154e-15	1.17995e-14	1.23582e-14
		9.25	-1.08683e-14	4.87327e-15	1.09071e-14	8.41955e-15	1.59432e-14	1.13128e-14
		9.27	-9.93243e-15	5.99347e-15	6.0692e-15	8.96236e-15	1.18748e-14	1.14107e-14
		9.29	-4.4472e-15	3.18752e-15	1.13539e-14	8.88292e-15	1.74945e-14	1.47794e-14
		9.31	-1.23446e-14	3.98118e-15	1.38119e-14	1.14374e-14	1.67369e-14	1.21179e-14
		9.33	-9.36888e-15	4.66707e-15	4.09643e-15	6.09097e-15	1.47102e-14	1.17114e-14
		9.35	-1.18575e-14	6.07749e-15	9.43202e-15	6.67957e-15	1.75269e-14	1.49068e-14
		9.37	-8.15103e-15	4.04074e-15	1.01692e-14	9.08882e-15	1.79329e-14	1.60805e-14
		9.39	-1.26499e-14	6.21582e-15	1.20455e-14	8.58194e-15	1.47374e-14	1.03953e-14
		9.41	-1.51406e-14	8.39121e-15	1.429e-14	7.46611e-15	1.72093e-14	1.3242e-14
		9.43	-8.29936e-15	6.94027e-15	1.27432e-14	7.62696e-15	1.82661e-14	1.06063e-14
		9.45	-8.59013e-15	4.37921e-15	1.40199e-14	6.5769e-15	1.25261e-14	1.02925e-14
		9.47	-8.95594e-15	6.73359e-15	5.3421e-15	7.68685e-15	2.10653e-14	1.53707e-14
		9.49	-9.03144e-15	5.53308e-15	1.17479e-14	7.60136e-15	2.26722e-14	1.27917e-14
		9.51	-4.40944e-15	5.62691e-15	1.5735e-14	7.73615e-15	1.78603e-14	1.19909e-14
		9.53	-1.24421e-14	7.38669e-15	1.12894e-14	9.02004e-15	1.45784e-14	8.70476e-15
		9.55	-2.97588e-15	6.94072e-15	1.51897e-14	8.79824e-15	1.85756e-14	1.35649e-14
		9.57	-1.02787e-14	4.49616e-15	1.40435e-14	8.7391e-15	1.91814e-14	1.30973e-14
		9.59	-5.11228e-15	7.31194e-15	1.43003e-14	8.59553e-15	2.26668e-14	1.25481e-14
		9.61	-2.10754e-15	5.21851e-15	1.58715e-14	6.82228e-15	1.54451e-14	1.03174e-14
		9.63	-1.08714e-14	8.00546e-15	2.00345e-14	8.22066e-15	1.52487e-14	1.20887e-14
		9.65	-1.05355e-14	5.56715e-15	2.49296e-14	1.07634e-14	1.85228e-14	1.36374e-14
		9.67	-7.84092e-15	5.7449e-15	1.65516e-14	8.99963e-15	1.84552e-14	1.15842e-14
		9.69	-7.5394e-15	4.53022e-15	2.42591e-14	1.04771e-14	1.88569e-14	1.24194e-14
		9.71	-8.52542e-15	5.24868e-15	1.49253e-14	8.55481e-15	2.38673e-14	1.44079e-14
		9.73	-1.11444e-15	7.23072e-15	2.25571e-14	9.18932e-15	1.81277e-14	1.38066e-14
		9.75	-5.11673e-15	4.81541e-15	1.26177e-14	8.80395e-15	2.11583e-14	1.30357e-14
		9.77	-6.63031e-15	4.27058e-15	1.75803e-14	9.13067e-15	1.9352e-14	1.26233e-14
		9.79	-6.3078e-15	5.39518e-15	1.77392e-14	9.73511e-15	2.46873e-14	1.63217e-14
		9.81	-5.32846e-15	6.74267e-15	1.71874e-14	7.99953e-15	2.58537e-14	1.8432e-14
		9.83	4.48207e-16	1.18642e-14	1.19564e-14	7.66212e-15	1.79408e-14	1.5429e-14
		9.85	-1.09208e-14	6.49987e-15	1.78519e-14	9.20237e-15	1.82287e-14	1.34871e-14
		9.87	-8.75189e-15	5.67917e-15	1.58359e-14	9.22925e-15	1.90159e-14	1.39346e-14
		9.89	-4.52253e-15	5.56735e-15	1.16137e-14	7.17276e-15	1.7316e-14	1.0855e-14
		9.91	-1.65128e-14	5.84366e-15	1.25411e-14	9.12989e-15	2.59544e-14	1.76314e-14
		9.93	-1.17655e-14	5.29947e-15	1.16101e-14	8.43963e-15	2.43618e-14	1.60264e-14
		9.95	-1.02456e-14	6.85142e-15	6.23965e-15	8.01066e-15	2.0719e-14	1.29542e-14
		9.97	9.12773e-16	1.07248e-14	8.9369e-15	6.36966e-15	2.56452e-14	1.85481e-14
		9.99	-3.44858e-15	6.81859e-15	1.42101e-14	8.81836e-15	2.66714e-14	2.02262e-14
		10.01
		10.03
		10.05
		10.07
		10.09
		10.11
		10.13
		10.15
		10.17
		10.19
		10.21
		10.23
		10.25
		10.27
		10.29	5.05672e-13	4.85196e-14	5.07797e-13	4.92364e-14	3.87556e-13	5.29165e-14
		10.31	4.82383e-13	4.56592e-14	4.06613e-13	4.6392e-14	3.81737e-13	5.30658e-14
		10.33	4.81342e-13	4.59615e-14	3.59761e-13	4.30124e-14	3.64974e-13	4.9211e-14
		10.35	4.77557e-13	4.68246e-14	3.33783e-13	3.97451e-14	3.69129e-13	4.80691e-14
		10.37	4.79278e-13	4.65972e-14	3.24329e-13	4.20601e-14	3.617e-13	4.80826e-14
		10.39	4.7398e-13	4.68246e-14	3.11758e-13	3.83893e-14	3.60872e-13	4.5367e-14
		10.41	4.84601e-13	4.81386e-14	3.04541e-13	3.9234e-14	3.53071e-13	4.55875e-14
		10.43	4.79525e-13	4.76713e-14	3.06371e-13	3.96695e-14	3.6215e-13	4.38055e-14
		10.45	4.7895e-13	4.70949e-14	2.89979e-13	3.362e-14	3.62145e-13	4.57084e-14
		10.47	4.7976e-13	4.98649e-14	2.87934e-13	3.3593e-14	3.58205e-13	4.41001e-14
		10.49	4.75772e-13	4.99601e-14	2.79604e-13	3.39812e-14	3.57069e-13	4.38408e-14
		10.51	4.66899e-13	5.07078e-14	2.8104e-13	3.4308e-14	3.55572e-13	4.21983e-14
		10.53	4.622e-13	5.22155e-14	2.8102e-13	3.34762e-14	3.53062e-13	4.19071e-14
		10.55	4.62389e-13	5.20429e-14	2.77094e-13	3.28737e-14	3.52199e-13	4.2065e-14
		10.57	4.64129e-13	5.31001e-14	2.81133e-13	3.19474e-14	3.48407e-13	4.27244e-14
		10.59	4.66297e-13	5.29383e-14	2.77271e-13	3.29841e-14	3.49233e-13	3.93325e-14
		10.61	4.70242e-13	5.51462e-14	2.71331e-13	2.77785e-14	3.54489e-13	4.24677e-14
		10.63	4.70392e-13	5.55901e-14	2.67819e-13	2.88074e-14	3.47762e-13	4.03871e-14
		10.65	4.70801e-13	5.47227e-14	2.70193e-13	3.04401e-14	3.52278e-13	4.19188e-14
		10.67	4.65582e-13	5.65973e-14	2.60027e-13	2.91497e-14	3.4869e-13	4.08293e-14
		10.69	4.61498e-13	5.4735e-14	2.64382e-13	3.0311e-14	3.46847e-13	4.17917e-14
		10.71	4.69589e-13	5.52867e-14	2.62893e-13	2.99523e-14	3.46577e-13	3.86321e-14
		10.73	4.68099e-13	5.45339e-14	2.60355e-13	2.77152e-14	3.524e-13	4.0128e-14
		10.75	4.61922e-13	5.55394e-14	2.60272e-13	2.90493e-14	3.47474e-13	3.85871e-14
		10.77	4.63158e-13	5.54802e-14	2.58778e-13	3.13335e-14	3.45462e-13	3.87484e-14
		10.79	4.64831e-13	5.66462e-14	2.63337e-13	2.88871e-14	3.42401e-13	3.61195e-14
		10.81	4.54022e-13	5.47486e-14	2.59464e-13	2.83973e-14	3.42588e-13	4.00069e-14
		10.83	4.61294e-13	5.65657e-14	2.58459e-13	2.85412e-14	3.34511e-13	3.67078e-14
		10.85	4.6321e-13	5.69901e-14	2.53187e-13	3.02955e-14	3.44097e-13	3.71039e-14
		10.87	4.59697e-13	5.42061e-14	2.51557e-13	2.96798e-14	3.43736e-13	3.98706e-14
		10.89	4.62361e-13	5.59405e-14	2.47394e-13	2.75132e-14	3.4303e-13	3.86303e-14
		10.91	4.5857e-13	5.60507e-14	2.53536e-13	3.00985e-14	3.42031e-13	3.87739e-14
		10.93	4.57994e-13	5.48049e-14	2.43812e-13	2.60649e-14	3.35649e-13	3.61296e-14
		10.95	4.54179e-13	5.76614e-14	2.4439e-13	2.73047e-14	3.38845e-13	3.87238e-14
		10.97	4.5682e-13	5.72863e-14	2.47472e-13	2.7405e-14	3.4311e-13	3.70281e-14
		10.99	4.58786e-13	5.93639e-14	2.45599e-13	2.70457e-14	3.35504e-13	3.46605e-14
		11.01	4.61754e-13	5.76701e-14	2.44509e-13	2.77809e-14	3.42273e-13	3.52844e-14
		11.03	4.59035e-13	5.76132e-14	2.50012e-13	2.7435e-14	3.39447e-13	3.72493e-14
		11.05	4.5534e-13	5.80963e-14	2.3488e-13	2.59706e-14	3.39634e-13	3.71496e-14
		11.07	4.54785e-13	5.76095e-14	2.42702e-13	2.78348e-14	3.35653e-13	3.53294e-14
		11.09	4.56499e-13	5.80783e-14	2.43616e-13	2.82921e-14	3.37479e-13	3.4363e-14
		11.11	4.48615e-13	5.76557e-14	2.41971e-13	2.83302e-14	3.3016e-13	3.35797e-14
		11.13	4.48627e-13	5.68897e-14	2.45126e-13	3.01231e-14	3.33944e-13	3.66072e-14
		11.15	4.46157e-13	5.88685e-14	2.36157e-13	2.80351e-14	3.34922e-13	3.51501e-14
		11.17	4.48497e-13	5.79848e-14	2.35267e-13	2.87822e-14	3.3826e-13	3.3956e-14
		11.19	4.55653e-13	5.83524e-14	2.3412e-13	2.82406e-14	3.31588e-13	3.45359e-14
		11.21	4.39455e-13	5.67098e-14	2.36972e-13	2.92946e-14	3.3333e-13	3.49705e-14
		11.23
		11.25
		11.27
		11.29	8.45403e-13	8.61224e-14	6.56823e-13	5.72357e-14	5.82132e-13	5.41436e-14
		11.31	8.41167e-13	8.80784e-14	5.54092e-13	4.74375e-14	5.78396e-13	5.54585e-14
		11.33	8.41249e-13	9.04266e-14	5.14604e-13	4.71519e-14	5.71205e-13	5.44075e-14
		11.35	8.4497e-13	9.13358e-14	4.8224e-13	4.43061e-14	5.67309e-13	5.08603e-14
		11.37	8.41073e-13	8.83398e-14	4.75304e-13	4.64667e-14	5.74088e-13	5.17251e-14
		11.39	8.43062e-13	8.98126e-14	4.58197e-13	4.40371e-14	5.62854e-13	5.07916e-14
		11.41	8.4321e-13	9.10698e-14	4.4966e-13	4.19987e-14	5.65246e-13	5.00119e-14
		11.43	8.3539e-13	8.88136e-14	4.41379e-13	4.27925e-14	5.62179e-13	4.82512e-14
		11.45	8.36565e-13	9.04768e-14	4.37228e-13	4.30059e-14	5.60379e-13	4.75087e-14
		11.47	8.36853e-13	9.03419e-14	4.34687e-13	4.13632e-14	5.57216e-13	4.83892e-14
		11.49	8.31479e-13	9.17053e-14	4.2529e-13	4.42142e-14	5.58552e-13	4.72104e-14
		11.51	8.34693e-13	9.17578e-14	4.23563e-13	3.88273e-14	5.5931e-13	4.91652e-14
		11.53	8.34553e-13	9.29724e-14	4.19807e-13	3.80004e-14	5.55611e-13	4.65751e-14
		11.55	8.3356e-13	9.28382e-14	4.21824e-13	3.93558e-14	5.56781e-13	4.7519e-14
		11.57	8.26565e-13	9.33504e-14	4.15819e-13	3.91291e-14	5.5633e-13	4.63742e-14
		11.59	8.3264e-13	9.3208e-14	4.16525e-13	4.20213e-14	5.53572e-13	4.62007e-14
		11.61	8.25237e-13	9.3068e-14	4.1458e-13	4.03099e-14	5.54174e-13	4.8381e-14
		11.63	8.23278e-13	9.44405e-14	4.12121e-13	4.14956e-14	5.48872e-13	4.587e-14
		11.65	8.26962e-13	9.47647e-14	4.10808e-13	3.88248e-14	5.5423e-13	4.78975e-14
		11.67	8.25488e-13	9.33413e-14	4.03787e-13	3.80026e-14	5.43961e-13	4.5935e-14
		11.69	8.22234e-13	9.26551e-14	4.06796e-13	4.03195e-14	5.49005e-13	4.63842e-14
		11.71	8.24759e-13	9.42454e-14	4.02977e-13	3.876e-14	5.45943e-13	4.47324e-14
		11.73	8.20376e-13	9.44134e-14	4.04062e-13	3.9572e-14	5.43582e-13	4.5183e-14
		11.75	8.25569e-13	9.44841e-14	3.92698e-13	3.83289e-14	5.4464e-13	4.4103e-14
		11.77	8.16711e-13	9.43319e-14	3.91663e-13	3.97353e-14	5.44524e-13	4.42381e-14
		11.79	8.193e-13	9.45398e-14	3.95068e-13	3.8637e-14	5.42981e-13	4.45562e-14
		11.81	8.15413e-13	9.55918e-14	3.96133e-13	3.93765e-14	5.44975e-13	4.66573e-14
		11.83	8.17651e-13	9.59461e-14	3.94986e-13	3.71937e-14	5.45676e-13	4.69314e-14
		11.85	8.16206e-13	9.57186e-14	3.97137e-13	3.86543e-14	5.41929e-13	4.655e-14
		11.87	8.07206e-13	9.4012e-14	3.92454e-13	3.74533e-14	5.42714e-13	4.57987e-14
		11.89	8.06939e-13	9.40773e-14	3.83143e-13	3.80449e-14	5.33502e-13	4.168e-14
		11.91	8.0576e-13	9.4479e-14	3.84938e-13	3.97443e-14	5.42602e-13	4.55757e-14
		11.93	8.05246e-13	9.41226e-14	3.80214e-13	3.67015e-14	5.36735e-13	4.41943e-14
		11.95	8.0417e-13	9.52953e-14	3.89395e-13	3.76071e-14	5.39015e-13	4.23392e-14
		11.97	8.03525e-13	9.21425e-14	3.83185e-13	3.76922e-14	5.39268e-13	4.41411e-14
		11.99	8.04177e-13	9.33348e-14	3.80985e-13	3.77598e-14	5.3054e-13	4.40831e-14
		12.01	7.97304e-13	9.03507e-14	3.8597e-13	3.80892e-14	5.30971e-13	4.15217e-14
		12.03	7.96305e-13	9.27346e-14	3.85262e-13	3.80029e-14	5.30634e-13	3.99919e-14
		12.05	7.95949e-13	9.30853e-14	3.79007e-13	3.62466e-14	5.35455e-13	4.33257e-14
		12.07	7.90266e-13	9.08424e-14	3.8204e-13	3.91282e-14	5.2914e-13	4.42744e-14
		12.09	7.90358e-13	9.26005e-14	3.9018e-13	3.87382e-14	5.29473e-13	4.40761e-14
		12.11	7.93844e-13	9.31949e-14	3.80619e-13	3.57314e-14	5.32224e-13	4.5029e-14
		12.13	7.87366e-13	9.27533e-14	3.84964e-13	3.76911e-14	5.2885e-13	4.32462e-14
		12.15	7.93288e-13	9.1864e-14	3.72473e-13	3.4925e-14	5.26817e-13	4.2036e-14
		12.17	7.83103e-13	9.1974e-14	3.72501e-13	3.44505e-14	5.28328e-13	4.18115e-14
		12.19	7.84491e-13	9.22932e-14	3.73335e-13	3.58061e-14	5.24629e-13	4.02421e-14
		12.21	7.84435e-13	9.26327e-14	3.73534e-13	3.47567e-14	5.24559e-13	4.48647e-14
		12.23
		12.25
		12.27
		12.29	1.16138e-12	1.09845e-13	7.98426e-13	6.66119e-14	7.56225e-13	5.99648e-14
		12.31	1.14553e-12	1.14174e-13	6.92054e-13	5.6772e-14	7.4385e-13	5.69086e-14
		12.33	1.14413e-12	1.1289e-13	6.471e-13	5.67111e-14	7.44986e-13	5.7366e-14
		12.35	1.14982e-12	1.13808e-13	6.16337e-13	5.255e-14	7.44833e-13	5.53877e-14
		12.37	1.14957e-12	1.1335e-13	6.05226e-13	4.96878e-14	7.47817e-13	5.51029e-14
		12.39	1.14742e-12	1.14654e-13	5.90828e-13	5.23534e-14	7.34222e-13	5.24011e-14
		12.41	1.14267e-12	1.16839e-13	5.80952e-13	5.05412e-14	7.43943e-13	5.36163e-14
		12.43	1.14134e-12	1.15859e-13	5.78936e-13	4.88591e-14	7.3423e-13	5.11986e-14
		12.45	1.13827e-12	1.15566e-13	5.6826e-13	4.98843e-14	7.40726e-13	5.38026e-14
		12.47	1.13851e-12	1.16584e-13	5.63017e-13	4.84702e-14	7.40231e-13	5.05376e-14
		12.49	1.13665e-12	1.15442e-13	5.60532e-13	4.89318e-14	7.34332e-13	5.10703e-14
		12.51	1.13719e-12	1.16806e-13	5.53773e-13	4.48272e-14	7.31868e-13	5.00421e-14
		12.53	1.13606e-12	1.1788e-13	5.53657e-13	4.89657e-14	7.31064e-13	5.14393e-14
		12.55	1.13369e-12	1.15365e-13	5.52217e-13	4.99468e-14	7.29402e-13	4.964e-14
		12.57	1.13093e-12	1.16498e-13	5.45017e-13	4.71338e-14	7.31172e-13	5.32558e-14
		12.59	1.1343e-12	1.19558e-13	5.46996e-13	4.72787e-14	7.29358e-13	5.11274e-14
		12.61	1.12417e-12	1.16816e-13	5.36745e-13	4.48321e-14	7.31128e-13	5.04296e-14
		12.63	1.12026e-12	1.16387e-13	5.45818e-13	4.6754e-14	7.29512e-13	5.1884e-14
		12.65	1.1161e-12	1.15786e-13	5.43941e-13	5.08586e-14	7.22092e-13	4.95821e-14
		12.67	1.12396e-12	1.18976e-13	5.36488e-13	4.55329e-14	7.20571e-13	4.88316e-14
		12.69	1.11598e-12	1.17843e-13	5.41564e-13	5.07363e-14	7.24529e-13	5.29848e-14
		12.71	1.11319e-12	1.165e-13	5.3349e-13	4.50221e-14	7.15946e-13	4.7405e-14
		12.73	1.11083e-12	1.17019e-13	5.30061e-13	4.6676e-14	7.20332e-13	4.96218e-14
		12.75	1.10833e-12	1.16062e-13	5.29172e-13	4.40007e-14	7.14511e-13	4.94872e-14
		12.77	1.10669e-12	1.1639e-13	5.3095e-13	4.44165e-14	7.17415e-13	5.05345e-14
		12.79	1.10786e-12	1.17064e-13	5.26286e-13	4.74291e-14	7.13114e-13	4.99525e-14
		12.81	1.10424e-12	1.16378e-13	5.20323e-13	4.39292e-14	7.04452e-13	4.76967e-14
		12.83	1.09738e-12	1.16176e-13	5.24735e-13	4.50195e-14	7.07862e-13	4.91285e-14
		12.85	1.09001e-12	1.1621e-13	5.1942e-13	4.65552e-14	7.0673e-13	4.73702e-14
		12.87	1.09294e-12	1.15794e-13	5.10275e-13	4.56382e-14	7.01289e-13	4.65121e-14
		12.89	1.08951e-12	1.16217e-13	5.15539e-13	4.54652e-14	7.08873e-13	4.93896e-14
		12.91	1.08561e-12	1.15854e-13	5.18068e-13	4.55833e-14	6.99157e-13	4.7808e-14
		12.93	1.08919e-12	1.14728e-13	5.14112e-13	4.68517e-14	6.93632e-13	4.71031e-14
		12.95	1.08437e-12	1.16113e-13	5.08832e-13	4.47547e-14	7.04152e-13	4.9559e-14
		12.97	1.07615e-12	1.15607e-13	5.14976e-13	4.65945e-14	6.98405e-13	4.54736e-14
		12.99	1.07705e-12	1.15997e-13	5.09506e-13	4.82787e-14	6.94851e-13	4.7407e-14
		13.01	1.08378e-12	1.16415e-13	5.08808e-13	4.84894e-14	6.91762e-13	4.74328e-14
		13.03	1.0755e-12	1.16294e-13	5.11412e-13	4.78998e-14	6.91701e-13	4.8402e-14
		13.05	1.07006e-12	1.1541e-13	5.05209e-13	4.29829e-14	6.93633e-13	4.60755e-14
		13.07	1.07559e-12	1.15936e-13	5.06932e-13	4.50864e-14	6.95244e-13	4.6967e-14
		13.09	1.06591e-12	1.16008e-13	5.03257e-13	4.41175e-14	6.89529e-13	4.73227e-14
		13.11	1.05899e-12	1.15673e-13	5.0263e-13	4.4588e-14	6.89408e-13	4.59128e-14
		13.13	1.06236e-12	1.15995e-13	4.94496e-13	4.62552e-14	6.84008e-13	4.53663e-14
		13.15	1.06146e-12	1.15878e-13	5.00535e-13	4.56565e-14	6.83886e-13	4.7034e-14
		13.17	1.05552e-12	1.14937e-13	4.91869e-13	4.66558e-14	6.81337e-13	4.59999e-14
		13.19	1.05567e-12	1.14587e-13	4.99524e-13	4.45214e-14	6.77163e-13	4.39777e-14
		13.21	1.0528e-12	1.17541e-13	4.88979e-13	4.38209e-14	6.68024e-13	4.48098e-14
		13.23
		13.25
		13.27
		13.29	1.39427e-12	1.28273e-13	9.0021e-13	7.06497e-14	8.90787e-13	5.79495e-14
		13.31	1.3802e-12	1.30348e-13	7.9286e-13	6.68095e-14	8.82866e-13	5.46363e-14
		13.33	1.37854e-12	1.2931e-13	7.43393e-13	6.11875e-14	8.84916e-13	5.67603e-14
		13.35	1.40938e-12	1.26365e-13	7.15025e-13	5.97222e-14	8.77585e-13	5.29665e-14
		13.37	1.39875e-12	1.26734e-13	7.01359e-13	5.93266e-14	8.81869e-13	5.36341e-14
		13.39	1.40251e-12	1.25974e-13	6.92006e-13	6.09736e-14	8.76312e-13	5.03197e-14
		13.41	1.40573e-12	1.27746e-13	6.83941e-13	5.90015e-14	8.69614e-13	4.97921e-14
		13.43	1.38947e-12	1.30086e-13	6.78994e-13	6.12826e-14	8.73796e-13	5.19314e-14
		13.45	1.38997e-12	1.29424e-13	6.69559e-13	5.71424e-14	8.75076e-13	5.05766e-14
		13.47	1.38725e-12	1.28249e-13	6.61179e-13	5.55515e-14	8.70279e-13	5.14041e-14
		13.49	1.38255e-12	1.30081e-13	6.68404e-13	5.993e-14	8.64022e-13	4.92119e-14
		13.51	1.38497e-12	1.29531e-13	6.64229e-13	6.03556e-14	8.66802e-13	4.98109e-14
		13.53	1.3853e-12	1.28378e-13	6.57075e-13	5.71189e-14	8.60553e-13	4.91749e-14
		13.55	1.36277e-12	1.3047e-13	6.48941e-13	5.5298e-14	8.66005e-13	5.1472e-14
		13.57	1.36143e-12	1.29524e-13	6.5246e-13	5.7245e-14	8.60233e-13	4.81591e-14
		13.59	1.36874e-12	1.29107e-13	6.46302e-13	5.63586e-14	8.75733e-13	5.58106e-14
		13.61	1.35951e-12	1.31167e-13	6.40072e-13	5.15557e-14	8.57158e-13	4.72523e-14
		13.63	1.35795e-12	1.29585e-13	6.44985e-13	5.67057e-14	8.58553e-13	5.05399e-14
		13.65	1.34454e-12	1.31765e-13	6.41302e-13	5.77677e-14	8.52298e-13	4.91607e-14
		13.67	1.3531e-12	1.2889e-13	6.39236e-13	5.72259e-14	8.45533e-13	4.6087e-14
		13.69	1.35357e-12	1.29771e-13	6.30257e-13	5.74943e-14	8.49863e-13	4.95544e-14
		13.71	1.34235e-12	1.30634e-13	6.35338e-13	5.66712e-14	8.48089e-13	4.61323e-14
		13.73	1.333e-12	1.30029e-13	6.27667e-13	5.38351e-14	8.42639e-13	4.76365e-14
		13.75	1.34131e-12	1.28792e-13	6.25035e-13	5.57645e-14	8.41787e-13	4.68897e-14
		13.77	1.33008e-12	1.31245e-13	6.25475e-13	5.34615e-14	8.37707e-13	4.53888e-14
		13.79	1.3292e-12	1.29582e-13	6.18276e-13	5.67003e-14	8.39443e-13	4.7753e-14
		13.81	1.32489e-12	1.30507e-13	6.24035e-13	5.53623e-14	8.3455e-13	4.46568e-14
		13.83	1.32463e-12	1.26677e-13	6.2373e-13	5.60794e-14	8.3491e-13	4.46556e-14
		13.85	1.33063e-12	1.28073e-13	6.15048e-13	5.42001e-14	8.32752e-13	4.56612e-14
		13.87	1.32009e-12	1.27754e-13	6.15444e-13	5.43863e-14	8.28396e-13	4.40767e-14
		13.89	1.3154e-12	1.28658e-13	6.13849e-13	5.55756e-14	8.30451e-13	4.57114e-14
		13.91	1.30628e-12	1.30241e-13	6.19571e-13	5.27638e-14	8.27238e-13	4.44081e-14
		13.93	1.3075e-12	1.30439e-13	6.13891e-13	5.52576e-14	8.26946e-13	4.59618e-14
		13.95	1.3101e-12	1.30368e-13	6.13247e-13	5.44909e-14	8.24065e-13	4.49923e-14
		13.97	1.30186e-12	1.28717e-13	6.12781e-13	5.36877e-14	8.21005e-13	4.56014e-14
		13.99	1.29965e-12	1.29136e-13	6.06509e-13	5.37114e-14	8.22697e-13	4.45262e-14
		14.01	1.29932e-12	1.28358e-13	6.06268e-13	5.25815e-14	8.16679e-13	4.36519e-14
		14.03	1.29578e-12	1.30037e-13	6.06403e-13	5.1977e-14	8.20507e-13	4.42525e-14
		14.05	1.29598e-12	1.28108e-13	5.99803e-13	5.37421e-14	8.20472e-13	4.52438e-14
		14.07	1.29476e-12	1.26597e-13	6.06957e-13	5.48026e-14	8.17881e-13	4.48212e-14
		14.09	1.2871e-12	1.25592e-13	6.02605e-13	5.12509e-14	8.14588e-13	4.41334e-14
		14.11	1.2866e-12	1.25943e-13	5.94978e-13	5.13355e-14	8.14193e-13	4.43826e-14
		14.13	1.28169e-12	1.26494e-13	5.97298e-13	5.19375e-14	8.06295e-13	4.32493e-14
		14.15	1.2868e-12	1.26608e-13	5.94075e-13	5.17571e-14	8.04046e-13	4.30285e-14
		14.17	1.27886e-12	1.26112e-13	5.93001e-13	5.20511e-14	8.16067e-13	4.55557e-14
		14.19	1.27392e-12	1.26846e-13	5.90968e-13	5.2251e-14	8.05296e-13	4.25375e-14
		14.21	1.27145e-12	1.27002e-13	5.87214e-13	5.26674e-14	8.07453e-13	4.50644e-14
		14.23
		14.25
		14.27
		14.29	1.59636e-12	1.40615e-13	9.82077e-13	7.72513e-14	1.00093e-12	5.59534e-14
		14.31	1.57873e-12	1.41543e-13	8.75928e-13	6.96842e-14	9.97722e-13	5.41339e-14
		14.33	1.57849e-12	1.41167e-13	8.30752e-13	6.63718e-14	9.96354e-13	5.27727e-14
		14.35	1.58334e-12	1.40043e-13	8.08804e-13	6.58026e-14	9.94842e-13	5.09859e-14
		14.37	1.58347e-12	1.40467e-13	7.91757e-13	6.70868e-14	9.88879e-13	4.9089e-14
		14.39	1.57623e-12	1.40743e-13	7.78976e-13	6.49093e-14	9.97057e-13	5.26044e-14
		14.41	1.57956e-12	1.39346e-13	7.75983e-13	6.58528e-14	9.94002e-13	4.95584e-14
		14.43	1.57048e-12	1.40942e-13	7.63218e-13	6.29172e-14	9.87163e-13	4.86311e-14
		14.45	1.56949e-12	1.41132e-13	7.63211e-13	6.28109e-14	9.89855e-13	5.01637e-14
		14.47	1.56771e-12	1.43418e-13	7.57062e-13	6.54494e-14	9.87127e-13	4.83453e-14
		14.49	1.56912e-12	1.40365e-13	7.56274e-13	6.43146e-14	9.83358e-13	4.87315e-14
		14.51	1.55825e-12	1.42932e-13	7.46532e-13	6.29006e-14	9.7999e-13	4.7831e-14
		14.53	1.55279e-12	1.43871e-13	7.4199e-13	6.23646e-14	9.79945e-13	4.9164e-14
		14.55	1.54922e-12	1.43384e-13	7.42592e-13	6.26652e-14	9.71675e-13	4.74602e-14
		14.57	1.54574e-12	1.4522e-13	7.30964e-13	6.09394e-14	9.70245e-13	4.55292e-14
		14.59	1.54248e-12	1.44003e-13	7.32444e-13	6.09858e-14	9.66621e-13	4.57934e-14
		14.61	1.53658e-12	1.44734e-13	7.3371e-13	6.23351e-14	9.68434e-13	4.70467e-14
		14.63	1.53178e-12	1.40995e-13	7.26104e-13	5.97879e-14	9.62011e-13	4.44675e-14
		14.65	1.5303e-12	1.43097e-13	7.18147e-13	5.90627e-14	9.60165e-13	4.67207e-14
		14.67	1.52705e-12	1.42078e-13	7.14964e-13	5.75457e-14	9.55578e-13	4.4852e-14
		14.69	1.52257e-12	1.42406e-13	7.11321e-13	5.84125e-14	9.54256e-13	4.66161e-14
		14.71	1.52117e-12	1.44255e-13	7.17214e-13	5.98047e-14	9.5232e-13	4.56871e-14
		14.73	1.51867e-12	1.4532e-13	7.12386e-13	5.88542e-14	9.47499e-13	4.35027e-14
		14.75	1.51689e-12	1.44642e-13	7.07484e-13	5.74353e-14	9.47635e-13	4.55867e-14
		14.77	1.52013e-12	1.46833e-13	7.08195e-13	6.00939e-14	9.37999e-13	4.22191e-14
		14.79	1.50995e-12	1.45842e-13	7.06992e-13	5.95075e-14	9.44355e-13	4.53626e-14
		14.81	1.50369e-12	1.41145e-13	6.98749e-13	5.72017e-14	9.40386e-13	4.49245e-14
		14.83	1.49564e-12	1.42891e-13	6.97149e-13	5.66756e-14	9.40604e-13	4.52322e-14
		14.85	1.50047e-12	1.43121e-13	6.96698e-13	5.71136e-14	9.3452e-13	4.43595e-14
		14.87	1.49622e-12	1.41735e-13	6.92823e-13	5.54956e-14	9.32233e-13	4.43074e-14
		14.89	1.48529e-12	1.39371e-13	6.92836e-13	5.64838e-14	9.27753e-13	4.32237e-14
		14.91	1.48505e-12	1.41256e-13	6.86823e-13	5.69501e-14	9.24332e-13	4.28899e-14
		14.93	1.47651e-12	1.41885e-13	6.88962e-13	5.55092e-14	9.29365e-13	4.31556e-14
		14.95	1.48804e-12	1.4179e-13	6.86727e-13	5.50718e-14	9.24569e-13	4.37492e-14
		14.97	1.47411e-12	1.39698e-13	6.82475e-13	5.55707e-14	9.23972e-13	4.10823e-14
		14.99	1.47214e-12	1.39192e-13	6.82316e-13	5.46285e-14	9.20234e-13	4.39264e-14
		15.01	1.46843e-12	1.37947e-13	6.86156e-13	5.53949e-14	9.25486e-13	4.42623e-14
		15.03	1.47018e-12	1.4087e-13	6.83295e-13	5.39514e-14	9.19197e-13	4.325e-14
		15.05	1.46312e-12	1.39545e-13	6.80101e-13	5.62207e-14	9.23546e-13	4.61555e-14
		15.07	1.46409e-12	1.402e-13	6.81242e-13	5.79755e-14	9.1578e-13	4.27326e-14
		15.09	1.45771e-12	1.38214e-13	6.73029e-13	5.27843e-14	9.17271e-13	4.2627e-14
		15.11	1.4545e-12	1.38127e-13	6.74506e-13	5.52476e-14	9.08337e-13	4.16902e-14
		15.13	1.45086e-12	1.40832e-13	6.73504e-13	5.55321e-14	9.05568e-13	4.1148e-14
		15.15	1.44687e-12	1.37472e-13	6.69957e-13	5.27954e-14	9.02894e-13	4.27709e-14
		15.17	1.44178e-12	1.38731e-13	6.7037e-13	5.47725e-14	9.07e-13	4.36068e-14
		15.19	1.43882e-12	1.3584e-13	6.64138e-13	5.35466e-14	9.1133e-13	4.42116e-14
		15.21	1.4438e-12	1.36664e-13	6.67696e-13	5.47851e-14	9.0862e-13	4.3995e-14
		15.23
		15.25
		15.27
		15.29	1.74755e-12	1.51412e-13	1.05167e-12	7.85142e-14	1.10239e-12	5.62597e-14
		15.31	1.7358e-12	1.51455e-13	9.48938e-13	7.52936e-14	1.0979e-12	5.56803e-14
		15.33	1.73759e-12	1.51511e-13	9.03709e-13	7.18289e-14	1.09435e-12	5.57534e-14
		15.35	1.73219e-12	1.52633e-13	8.783e-13	6.95844e-14	1.09853e-12	5.53829e-14
		15.37	1.73325e-12	1.52705e-13	8.52201e-13	6.77283e-14	1.08326e-12	5.20742e-14
		15.39	1.73309e-12	1.53123e-13	8.60369e-13	7.01534e-14	1.08553e-12	5.17789e-14
		15.41	1.72597e-12	1.5526e-13	8.41159e-13	6.92764e-14	1.08183e-12	5.09564e-14
		15.43	1.72704e-12	1.53469e-13	8.40338e-13	6.78681e-14	1.07864e-12	4.95754e-14
		15.45	1.71024e-12	1.51141e-13	8.31465e-13	6.66019e-14	1.07499e-12	4.82728e-14
		15.47	1.71515e-12	1.5378e-13	8.29671e-13	6.72542e-14	1.07115e-12	4.73773e-14
		15.49	1.7135e-12	1.52248e-13	8.26194e-13	6.54153e-14	1.06773e-12	4.85328e-14
		15.51	1.70891e-12	1.5513e-13	8.23307e-13	6.56305e-14	1.06875e-12	4.7055e-14
		15.53	1.70235e-12	1.5322e-13	8.14246e-13	6.31707e-14	1.06924e-12	4.77059e-14
		15.55	1.6953e-12	1.53953e-13	8.11397e-13	6.66396e-14	1.06678e-12	4.78891e-14
		15.57	1.69042e-12	1.53236e-13	8.10922e-13	6.46374e-14	1.06696e-12	4.92469e-14
		15.59	1.6981e-12	1.53015e-13	8.06954e-13	6.31113e-14	1.06279e-12	4.8038e-14
		15.61	1.68749e-12	1.52036e-13	8.05431e-13	6.2164e-14	1.06025e-12	4.75297e-14
		15.63	1.68083e-12	1.52904e-13	8.02031e-13	6.42648e-14	1.05511e-12	4.60599e-14
		15.65	1.68082e-12	1.52926e-13	7.98074e-13	6.24915e-14	1.05938e-12	4.7211e-14
		15.67	1.67513e-12	1.52959e-13	7.93869e-13	6.36776e-14	1.05456e-12	4.68521e-14
		15.69	1.67135e-12	1.52094e-13	7.94654e-13	6.29065e-14	1.04641e-12	4.77361e-14
		15.71	1.66909e-12	1.50852e-13	7.98781e-13	6.5003e-14	1.04721e-12	4.61094e-14
		15.73	1.66427e-12	1.50763e-13	7.85387e-13	6.1791e-14	1.05024e-12	4.64639e-14
		15.75	1.6647e-12	1.52472e-13	7.82923e-13	5.86679e-14	1.04523e-12	4.68921e-14
		15.77	1.66002e-12	1.50591e-13	7.86384e-13	6.20073e-14	1.04214e-12	4.64987e-14
		15.79	1.66629e-12	1.5159e-13	7.73649e-13	6.00792e-14	1.04047e-12	4.79266e-14
		15.81	1.64991e-12	1.5182e-13	7.73407e-13	5.94198e-14	1.03896e-12	4.62003e-14
		15.83	1.64861e-12	1.51051e-13	7.76383e-13	5.88732e-14	1.04016e-12	4.69503e-14
		15.85	1.64372e-12	1.51694e-13	7.74398e-13	5.98283e-14	1.03566e-12	4.72845e-14
		15.87	1.64227e-12	1.51402e-13	7.66754e-13	5.85423e-14	1.038e-12	4.78491e-14
		15.89	1.62971e-12	1.50173e-13	7.6318e-13	5.96339e-14	1.02845e-12	4.51305e-14
		15.91	1.62939e-12	1.49823e-13	7.70853e-13	6.14186e-14	1.03321e-12	4.69022e-14
		15.93	1.62334e-12	1.48455e-13	7.66262e-13	5.97817e-14	1.02522e-12	4.56116e-14
		15.95	1.61973e-12	1.47677e-13	7.61892e-13	5.59712e-14	1.02073e-12	4.46185e-14
		15.97	1.61492e-12	1.4831e-13	7.55462e-13	5.76671e-14	1.02575e-12	4.67271e-14
		15.99	1.61668e-12	1.48616e-13	7.5967e-13	5.85427e-14	1.01974e-12	4.41276e-14
		16.01	1.61723e-12	1.48377e-13	7.58144e-13	5.90065e-14	1.01113e-12	4.26802e-14
		16.03	1.61543e-12	1.48735e-13	7.55084e-13	5.74401e-14	1.01789e-12	4.5206e-14
		16.05	1.60655e-12	1.48495e-13	7.50048e-13	5.91257e-14	1.01584e-12	4.51393e-14
		16.07	1.61317e-12	1.47367e-13	7.48969e-13	5.80582e-14	1.0191e-12	4.58956e-14
		16.09	1.60476e-12	1.45497e-13	7.45067e-13	5.85305e-14	1.01208e-12	4.52983e-14
		16.11	1.60224e-12	1.47908e-13	7.50661e-13	5.81599e-14	1.01505e-12	4.71944e-14
		16.13	1.59807e-12	1.48259e-13	7.41532e-13	5.82379e-14	1.01433e-12	4.51035e-14
		16.15	1.59393e-12	1.47009e-13	7.38261e-13	5.82546e-14	1.00464e-12	4.46833e-14
		16.17	1.59157e-12	1.46685e-13	7.41033e-13	5.42268e-14	1.00949e-12	4.59821e-14
		16.19	1.58748e-12	1.46038e-13	7.34952e-13	5.57469e-14	1.00412e-12	4.39564e-14
		16.21	1.58381e-12	1.45947e-13	7.33173e-13	5.61783e-14	9.94603e-13	4.0893e-14
		16.23
		16.25
		16.27
		16.29	1.88228e-12	1.61268e-13	1.12179e-12	8.19037e-14	1.19666e-12	5.93629e-14
		16.31	1.88055e-12	1.62906e-13	1.0283e-12	8.05051e-14	1.18265e-12	5.68066e-14
		16.33	1.87629e-12	1.59257e-13	9.71474e-13	7.52747e-14	1.17741e-12	5.48334e-14
		16.35	1.87448e-12	1.60522e-13	9.45659e-13	7.31886e-14	1.17846e-12	5.40419e-14
		16.37	1.86955e-12	1.57864e-13	9.35793e-13	7.39069e-14	1.17614e-12	5.32288e-14
		16.39	1.86763e-12	1.5819e-13	9.22371e-13	7.1927e-14	1.17944e-12	5.2427e-14
		16.41	1.86565e-12	1.57452e-13	9.15741e-13	7.2121e-14	1.17428e-12	5.12976e-14
		16.43	1.86045e-12	1.5792e-13	9.05927e-13	6.98237e-14	1.17689e-12	5.17707e-14
		16.45	1.85525e-12	1.57752e-13	8.99148e-13	7.00545e-14	1.16579e-12	5.0887e-14
		16.47	1.84829e-12	1.60245e-13	8.88211e-13	6.79714e-14	1.16741e-12	5.00063e-14
		16.49	1.85638e-12	1.59305e-13	8.85082e-13	6.92211e-14	1.16459e-12	5.14007e-14
		16.51	1.84033e-12	1.58148e-13	8.84201e-13	6.75314e-14	1.16439e-12	4.99295e-14
		16.53	1.83924e-12	1.60231e-13	8.7763e-13	6.74257e-14	1.15936e-12	5.05038e-14
		16.55	1.83851e-12	1.60004e-13	8.77621e-13	7.07805e-14	1.1578e-12	4.95497e-14
		16.57	1.82735e-12	1.57952e-13	8.65952e-13	6.75662e-14	1.15473e-12	4.90646e-14
		16.59	1.82835e-12	1.59099e-13	8.72752e-13	6.78423e-14	1.14958e-12	4.91482e-14
		16.61	1.81281e-12	1.56771e-13	8.69893e-13	6.87824e-14	1.15436e-12	4.93424e-14
		16.63	1.81469e-12	1.57352e-13	8.62236e-13	6.76535e-14	1.15004e-12	4.87319e-14
		16.65	1.8107e-12	1.57672e-13	8.57979e-13	6.65256e-14	1.14944e-12	4.83321e-14
		16.67	1.81315e-12	1.57684e-13	8.58903e-13	6.64039e-14	1.14079e-12	4.79077e-14
		16.69	1.80309e-12	1.57692e-13	8.59039e-13	6.65603e-14	1.13737e-12	4.72008e-14
		16.71	1.79893e-12	1.56526e-13	8.60493e-13	6.81156e-14	1.13735e-12	4.67735e-14
		16.73	1.79533e-12	1.5707e-13	8.53536e-13	6.39717e-14	1.1341e-12	4.7164e-14
		16.75	1.7891e-12	1.55557e-13	8.50156e-13	6.62986e-14	1.13241e-12	4.786e-14
		16.77	1.78771e-12	1.54908e-13	8.43607e-13	6.34442e-14	1.12968e-12	4.7371e-14
		16.79	1.78232e-12	1.55036e-13	8.3946e-13	6.38953e-14	1.12843e-12	4.76459e-14
		16.81	1.77776e-12	1.54406e-13	8.40462e-13	6.58078e-14	1.13124e-12	4.8536e-14
		16.83	1.77684e-12	1.5469e-13	8.39808e-13	6.45323e-14	1.13196e-12	4.85387e-14
		16.85	1.77073e-12	1.5354e-13	8.34529e-13	6.54735e-14	1.12341e-12	4.82349e-14
		16.87	1.77052e-12	1.535e-13	8.37725e-13	6.4187e-14	1.12353e-12	4.89811e-14
		16.89	1.76718e-12	1.53812e-13	8.321e-13	6.40665e-14	1.12585e-12	4.92754e-14
		16.91	1.75945e-12	1.53138e-13	8.34514e-13	6.50575e-14	1.12203e-12	4.81008e-14
		16.93	1.75407e-12	1.52029e-13	8.34744e-13	6.42953e-14	1.11507e-12	4.80283e-14
		16.95	1.75168e-12	1.51228e-13	8.26908e-13	6.3564e-14	1.11403e-12	4.64808e-14
		16.97	1.7484e-12	1.51838e-13	8.29768e-13	6.38874e-14	1.11333e-12	4.65441e-14
		16.99	1.73315e-12	1.49569e-13	8.24485e-13	6.43556e-14	1.10857e-12	4.74817e-14
		17.01	1.74108e-12	1.52872e-13	8.20896e-13	6.3419e-14	1.10954e-12	4.65289e-14
		17.03	1.74066e-12	1.52852e-13	8.21244e-13	6.57126e-14	1.105e-12	4.55659e-14
		17.05	1.72277e-12	1.50344e-13	8.16762e-13	6.41192e-14	1.10477e-12	4.71299e-14
		17.07	1.72253e-12	1.51581e-13	8.15588e-13	6.41266e-14	1.10052e-12	4.81324e-14
		17.09	1.71276e-12	1.50947e-13	8.10032e-13	6.19703e-14	1.09514e-12	4.63374e-14
		17.11	1.72221e-12	1.50942e-13	8.1276e-13	6.04756e-14	1.0963e-12	4.65409e-14
		17.13	1.7174e-12	1.48787e-13	8.08585e-13	6.34184e-14	1.0942e-12	4.59436e-14
		17.15	1.71289e-12	1.49001e-13	8.05254e-13	6.43836e-14	1.09209e-12	4.54755e-14
		17.17	1.70482e-12	1.48856e-13	8.02884e-13	6.17228e-14	1.08832e-12	4.3694e-14
		17.19	1.70277e-12	1.4881e-13	7.98344e-13	6.02848e-14	1.09232e-12	4.6511e-14
		17.21	1.7029e-12	1.47466e-13	8.04028e-13	6.03531e-14	1.08702e-12	4.62837e-14
		17.23
		17.25
		17.27
		17.29	1.98397e-12	1.61842e-13	1.19175e-12	9.42571e-14	1.27945e-12	6.07189e-14
		17.31	1.98125e-12	1.64098e-13	1.09291e-12	9.15811e-14	1.27262e-12	5.9628e-14
		17.33	1.9728e-12	1.63161e-13	1.03658e-12	8.16341e-14	1.26971e-12	5.87785e-14
		17.35	1.972e-12	1.63255e-13	1.01559e-12	8.23708e-14	1.2749e-12	5.81657e-14
		17.37	1.96984e-12	1.61968e-13	1.00447e-12	8.10012e-14	1.26149e-12	5.40911e-14
		17.39	1.97467e-12	1.62731e-13	9.91117e-13	8.21967e-14	1.26178e-12	5.43599e-14
		17.41	1.97271e-12	1.62627e-13	9.84372e-13	7.94261e-14	1.25926e-12	5.26998e-14
		17.43	1.96621e-12	1.62042e-13	9.7747e-13	7.99763e-14	1.26212e-12	5.30687e-14
		17.45	1.9536e-12	1.61429e-13	9.70392e-13	8.02186e-14	1.25863e-12	5.35387e-14
		17.47	1.9588e-12	1.61784e-13	9.69981e-13	7.88665e-14	1.258e-12	5.50504e-14
		17.49	1.94615e-12	1.6016e-13	9.63717e-13	7.85147e-14	1.24996e-12	5.1296e-14
		17.51	1.94668e-12	1.61854e-13	9.59036e-13	7.53763e-14	1.25204e-12	5.27864e-14
		17.53	1.94027e-12	1.61286e-13	9.59333e-13	7.71209e-14	1.24132e-12	4.93933e-14
		17.55	1.93957e-12	1.60511e-13	9.56822e-13	8.04191e-14	1.24525e-12	5.05875e-14
		17.57	1.93585e-12	1.60599e-13	9.526e-13	7.94222e-14	1.24403e-12	5.23625e-14
		17.59	1.93379e-12	1.60154e-13	9.42833e-13	7.27709e-14	1.23681e-12	5.00897e-14
		17.61	1.92828e-12	1.60864e-13	9.37999e-13	7.13165e-14	1.23711e-12	4.9769e-14
		17.63	1.93332e-12	1.60845e-13	9.41359e-13	7.739e-14	1.24048e-12	5.01204e-14
		17.65	1.92258e-12	1.59832e-13	9.35458e-13	7.20737e-14	1.23611e-12	5.13016e-14
		17.67	1.92538e-12	1.60104e-13	9.32622e-13	7.41587e-14	1.22997e-12	5.05216e-14
		17.69	1.91753e-12	1.60986e-13	9.23438e-13	7.2109e-14	1.23537e-12	5.20081e-14
		17.71	1.91546e-12	1.6027e-13	9.30211e-13	7.58375e-14	1.22958e-12	4.97432e-14
		17.73	1.91353e-12	1.59077e-13	9.28016e-13	7.45288e-14	1.22458e-12	4.99928e-14
		17.75	1.89698e-12	1.57337e-13	9.24071e-13	7.44832e-14	1.2213e-12	4.83457e-14
		17.77	1.89544e-12	1.58651e-13	9.16926e-13	7.43681e-14	1.22147e-12	5.07287e-14
		17.79	1.89141e-12	1.5843e-13	9.15979e-13	7.44094e-14	1.21854e-12	5.08053e-14
		17.81	1.88711e-12	1.56769e-13	9.11072e-13	7.20856e-14	1.22211e-12	5.11768e-14
		17.83	1.88475e-12	1.56642e-13	9.15627e-13	7.39036e-14	1.21145e-12	4.95728e-14
		17.85	1.8812e-12	1.58124e-13	9.02832e-13	6.87419e-14	1.21191e-12	5.08761e-14
		17.87	1.86687e-12	1.55702e-13	9.08588e-13	7.35824e-14	1.21023e-12	5.01087e-14
		17.89	1.86932e-12	1.5692e-13	9.03039e-13	7.13396e-14	1.20797e-12	4.86268e-14
		17.91	1.85806e-12	1.55249e-13	8.99318e-13	7.0287e-14	1.2046e-12	5.04432e-14
		17.93	1.85495e-12	1.54928e-13	8.98391e-13	7.07683e-14	1.20032e-12	5.00049e-14
		17.95	1.84948e-12	1.52591e-13	8.9383e-13	6.85734e-14	1.19742e-12	4.91778e-14
		17.97	1.84498e-12	1.5381e-13	8.92048e-13	7.15729e-14	1.19777e-12	4.97941e-14
		17.99	1.84499e-12	1.53814e-13	8.89947e-13	7.089e-14	1.19348e-12	4.79862e-14
		18.01	1.8502e-12	1.55097e-13	8.8518e-13	6.62755e-14	1.19148e-12	5.08833e-14
		18.03	1.83963e-12	1.5425e-13	8.85071e-13	6.77315e-14	1.18995e-12	4.852e-14
		18.05	1.83879e-12	1.53193e-13	8.87745e-13	7.0311e-14	1.18805e-12	4.96078e-14
		18.07	1.8279e-12	1.53376e-13	8.88694e-13	7.15376e-14	1.18235e-12	4.87557e-14
		18.09	1.82551e-12	1.5405e-13	8.83303e-13	7.1244e-14	1.18254e-12	4.79509e-14
		18.11	1.82191e-12	1.52664e-13	8.79607e-13	7.22368e-14	1.17683e-12	4.9118e-14
		18.13	1.80914e-12	1.51787e-13	8.85165e-13	7.48567e-14	1.17805e-12	4.99833e-14
		18.15	1.81701e-12	1.51699e-13	8.75519e-13	6.93469e-14	1.17467e-12	4.84444e-14
		18.17	1.8109e-12	1.51255e-13	8.77239e-13	7.24777e-14	1.17078e-12	4.63126e-14
		18.19	1.80603e-12	1.52303e-13	8.66113e-13	6.64191e-14	1.17349e-12	4.82219e-14
		18.21	1.79565e-12	1.49276e-13	8.70808e-13	7.05544e-14	1.17821e-12	4.94353e-14
		18.23
		18.25
		18.27
		18.29	2.08619e-12	1.65909e-13	1.2485e-12	1.01781e-13	1.36667e-12	6.73433e-14
		18.31	2.07274e-12	1.67497e-13	1.14671e-12	9.49401e-14	1.3549e-12	6.35295e-14
		18.33	2.07155e-12	1.65543e-13	1.10142e-12	9.08665e-14	1.35358e-12	6.33122e-14
		18.35	2.07313e-12	1.65805e-13	1.07493e-12	8.70847e-14	1.35576e-12	6.3358e-14
		18.37	2.06973e-12	1.64846e-13	1.06021e-12	8.89011e-14	1.34868e-12	6.01298e-14
		18.39	2.07154e-12	1.63845e-13	1.05144e-12	8.66312e-14	1.34535e-12	5.75051e-14
		18.41	2.06439e-12	1.62877e-13	1.03602e-12	8.27486e-14	1.34058e-12	5.74077e-14
		18.43	2.06273e-12	1.63879e-13	1.03203e-12	8.4665e-14	1.34471e-12	5.92475e-14
		18.45	2.05985e-12	1.65198e-13	1.02755e-12	8.28255e-14	1.33967e-12	5.66181e-14
		18.47	2.05347e-12	1.65969e-13	1.0225e-12	8.37402e-14	1.33886e-12	5.76842e-14
		18.49	2.05065e-12	1.63412e-13	1.01499e-12	8.27419e-14	1.33611e-12	5.65884e-14
		18.51	2.04226e-12	1.63931e-13	1.00992e-12	7.98631e-14	1.32423e-12	5.29014e-14
		18.53	2.04567e-12	1.63815e-13	1.00671e-12	7.99933e-14	1.32989e-12	5.38899e-14
		18.55	2.03235e-12	1.63053e-13	1.00883e-12	7.94528e-14	1.32523e-12	5.41973e-14
		18.57	2.03085e-12	1.62759e-13	1.00162e-12	7.85468e-14	1.32522e-12	5.5431e-14
		18.59	2.02833e-12	1.63485e-13	9.9862e-13	7.92419e-14	1.32671e-12	5.60769e-14
		18.61	2.02415e-12	1.63615e-13	9.9537e-13	7.86004e-14	1.32079e-12	5.50349e-14
		18.63	2.0316e-12	1.6467e-13	9.88713e-13	7.72438e-14	1.31766e-12	5.35337e-14
		18.65	2.01834e-12	1.63084e-13	9.87727e-13	7.9817e-14	1.31362e-12	5.36647e-14
		18.67	2.01068e-12	1.62188e-13	9.87297e-13	7.86254e-14	1.31219e-12	5.31825e-14
		18.69	2.00812e-12	1.61637e-13	9.83693e-13	8.06048e-14	1.30775e-12	5.22902e-14
		18.71	2.00381e-12	1.60844e-13	9.80205e-13	7.79111e-14	1.30749e-12	5.37575e-14
		18.73	1.99698e-12	1.59727e-13	9.8035e-13	7.89234e-14	1.3039e-12	5.14313e-14
		18.75	1.99893e-12	1.61742e-13	9.76718e-13	7.65092e-14	1.30012e-12	5.23944e-14
		18.77	1.98879e-12	1.59744e-13	9.79626e-13	7.7709e-14	1.30326e-12	5.41209e-14
		18.79	1.9799e-12	1.59371e-13	9.78626e-13	7.81901e-14	1.29731e-12	5.10771e-14
		18.81	1.98172e-12	1.61414e-13	9.67361e-13	7.26966e-14	1.29416e-12	5.06208e-14
		18.83	1.97627e-12	1.57029e-13	9.70631e-13	7.5341e-14	1.28947e-12	5.17881e-14
		18.85	1.96521e-12	1.57563e-13	9.64887e-13	7.2752e-14	1.28981e-12	5.17198e-14
		18.87	1.96468e-12	1.57295e-13	9.63736e-13	7.53461e-14	1.28607e-12	5.11747e-14
		18.89	1.96513e-12	1.57512e-13	9.56827e-13	7.42929e-14	1.28605e-12	5.27086e-14
		18.91	1.95713e-12	1.57716e-13	9.55454e-13	7.47559e-14	1.28191e-12	5.21428e-14
		18.93	1.95499e-12	1.56269e-13	9.57598e-13	7.39163e-14	1.28376e-12	5.116e-14
		18.95	1.95388e-12	1.55365e-13	9.50472e-13	7.48436e-14	1.28153e-12	5.28961e-14
		18.97	1.95007e-12	1.56753e-13	9.50974e-13	7.48366e-14	1.27108e-12	5.16298e-14
		18.99	1.94397e-12	1.56317e-13	9.50113e-13	7.36056e-14	1.27174e-12	5.08322e-14
		19.01	1.93732e-12	1.55427e-13	9.39685e-13	7.14164e-14	1.26665e-12	4.85389e-14
		19.03	1.93755e-12	1.54904e-13	9.43896e-13	7.24944e-14	1.26705e-12	4.97883e-14
		19.05	1.93194e-12	1.54881e-13	9.43787e-13	7.09337e-14	1.26477e-12	5.04384e-14
		19.07	1.92277e-12	1.52317e-13	9.43649e-13	7.31898e-14	1.2643e-12	5.0241e-14
		19.09	1.91845e-12	1.53932e-13	9.42315e-13	7.07486e-14	1.26523e-12	5.21854e-14
		19.11	1.91142e-12	1.52827e-13	9.29853e-13	6.83913e-14	1.26042e-12	5.22841e-14
		19.13	1.91368e-12	1.54052e-13	9.41992e-13	7.05968e-14	1.26192e-12	5.19284e-14
		19.15	1.91029e-12	1.52191e-13	9.29753e-13	6.93556e-14	1.25504e-12	4.91659e-14
		19.17	1.90755e-12	1.51892e-13	9.32565e-13	7.08782e-14	1.26059e-12	5.33588e-14
		19.19	1.89577e-12	1.51517e-13	9.30853e-13	7.10823e-14	1.24818e-12	5.05718e-14
		19.21	1.89022e-12	1.50733e-13	9.30242e-13	7.16654e-14	1.24359e-12	4.96193e-14
		19.23
		19.25
		19.27
		19.29	2.17769e-12	1.67565e-13	1.30598e-12	1.02628e-13	1.43703e-12	6.74591e-14
		19.31	2.15595e-12	1.64956e-13	1.20835e-12	9.55278e-14	1.42541e-12	6.68099e-14
		19.33	2.16113e-12	1.67556e-13	1.1531e-12	8.75889e-14	1.42192e-12	6.53082e-14
		19.35	2.16384e-12	1.66984e-13	1.13229e-12	8.66553e-14	1.42196e-12	6.27067e-14
		19.37	2.15507e-12	1.67439e-13	1.12206e-12	8.78413e-14	1.41675e-12	6.24781e-14
		19.39	2.15347e-12	1.64593e-13	1.10455e-12	8.36055e-14	1.41259e-12	5.92061e-14
		19.41	2.15338e-12	1.6588e-13	1.09224e-12	8.19701e-14	1.41687e-12	6.05179e-14
		19.43	2.1547e-12	1.67104e-13	1.09136e-12	8.30073e-14	1.40557e-12	5.92182e-14
		19.45	2.1461e-12	1.65575e-13	1.08725e-12	8.30615e-14	1.40958e-12	5.94082e-14
		19.47	2.13887e-12	1.64216e-13	1.07479e-12	8.08418e-14	1.4051e-12	5.83929e-14
		19.49	2.12963e-12	1.64007e-13	1.06893e-12	8.05097e-14	1.40854e-12	6.08341e-14
		19.51	2.12692e-12	1.61934e-13	1.07508e-12	8.28853e-14	1.40244e-12	5.93125e-14
		19.53	2.1243e-12	1.6093e-13	1.06713e-12	8.50024e-14	1.40266e-12	5.95483e-14
		19.55	2.11583e-12	1.60589e-13	1.06282e-12	8.17835e-14	1.4015e-12	5.88507e-14
		19.57	2.11154e-12	1.61622e-13	1.05672e-12	7.95478e-14	1.39428e-12	5.83167e-14
		19.59	2.11237e-12	1.63449e-13	1.05751e-12	7.97319e-14	1.3954e-12	5.83331e-14
		19.61	2.10331e-12	1.59243e-13	1.05469e-12	8.25315e-14	1.39341e-12	5.96979e-14
		19.63	2.10009e-12	1.6055e-13	1.04471e-12	7.96644e-14	1.38933e-12	5.9267e-14
		19.65	2.09328e-12	1.61064e-13	1.04992e-12	7.8375e-14	1.38575e-12	5.75742e-14
		19.67	2.09039e-12	1.59422e-13	1.03876e-12	7.64774e-14	1.38055e-12	5.75111e-14
		19.69	2.08782e-12	1.58903e-13	1.03274e-12	7.56826e-14	1.38665e-12	5.93984e-14
		19.71	2.08071e-12	1.6002e-13	1.03783e-12	7.81663e-14	1.3801e-12	5.84951e-14
		19.73	2.07312e-12	1.5856e-13	1.02943e-12	7.69847e-14	1.38673e-12	5.89537e-14
		19.75	2.07833e-12	1.59916e-13	1.03481e-12	7.69005e-14	1.37521e-12	5.7593e-14
		19.77	2.0699e-12	1.5919e-13	1.02739e-12	7.52963e-14	1.36969e-12	5.78813e-14
		19.79	2.06228e-12	1.58414e-13	1.02376e-12	7.5071e-14	1.36822e-12	5.74786e-14
		19.81	2.05408e-12	1.56895e-13	1.02254e-12	7.46309e-14	1.3696e-12	5.8595e-14
		19.83	2.05115e-12	1.58804e-13	1.01584e-12	7.4607e-14	1.36116e-12	5.77836e-14
		19.85	2.04798e-12	1.57242e-13	1.01942e-12	7.53546e-14	1.36094e-12	5.93595e-14
		19.87	2.04629e-12	1.58181e-13	1.019e-12	7.75462e-14	1.36019e-12	5.75197e-14
		19.89	2.04114e-12	1.5696e-13	1.01649e-12	7.27196e-14	1.35646e-12	5.85502e-14
		19.91	2.04021e-12	1.57825e-13	1.01605e-12	7.49173e-14	1.35272e-12	5.85182e-14
		19.93	2.03422e-12	1.57401e-13	1.00327e-12	7.14472e-14	1.35325e-12	5.77175e-14
		19.95	2.02163e-12	1.54553e-13	1.00762e-12	7.35732e-14	1.34949e-12	5.57064e-14
		19.97	2.02336e-12	1.55835e-13	1.00281e-12	7.13803e-14	1.34433e-12	5.51862e-14
		19.99	2.01678e-12	1.54794e-13	1.01009e-12	7.74122e-14	1.34217e-12	5.61471e-14
		20.01	2.01343e-12	1.53772e-13	9.98562e-13	7.14332e-14	1.34275e-12	5.66044e-14
		20.03	2.00801e-12	1.52361e-13	9.99144e-13	7.21905e-14	1.33622e-12	5.7179e-14
		20.05	2.00574e-12	1.52915e-13	1.00184e-12	7.37221e-14	1.33843e-12	5.5972e-14
		20.07	2.00101e-12	1.54595e-13	9.94316e-13	7.34419e-14	1.33816e-12	5.88065e-14
		20.09	1.992e-12	1.52324e-13	9.90533e-13	7.03998e-14	1.3358e-12	5.64265e-14
		20.11	1.97797e-12	1.51692e-13	9.84341e-13	6.98383e-14	1.33301e-12	5.61266e-14
		20.13	1.97392e-12	1.51364e-13	9.91095e-13	7.15946e-14	1.32447e-12	5.52252e-14
		20.15	1.97275e-12	1.51108e-13	9.88983e-13	7.40971e-14	1.32202e-12	5.49639e-14
		20.17	1.96978e-12	1.50531e-13	9.84932e-13	7.29546e-14	1.3249e-12	5.72975e-14
		20.19	1.96482e-12	1.509e-13	9.78495e-13	7.07862e-14	1.32195e-12	5.65402e-14
		20.21	1.96406e-12	1.51145e-13	9.78712e-13	6.85893e-14	1.31753e-12	5.62147e-14
		20.23
		20.25
		20.27
		20.29	2.24762e-12	1.68405e-13	1.35401e-12	9.99124e-14	1.50287e-12	6.99442e-14
		20.31	2.23507e-12	1.66636e-13	1.24994e-12	9.50254e-14	1.499e-12	6.94233e-14
		20.33	2.2319e-12	1.66607e-13	1.19829e-12	8.9896e-14	1.49657e-12	6.84368e-14
		20.35	2.23389e-12	1.68207e-13	1.17438e-12	8.70794e-14	1.49899e-12	6.78533e-14
		20.37	2.23342e-12	1.67261e-13	1.16639e-12	8.83293e-14	1.49587e-12	6.47301e-14
		20.39	2.2252e-12	1.63731e-13	1.14851e-12	8.47771e-14	1.49371e-12	6.48578e-14
		20.41	2.22695e-12	1.66082e-13	1.1461e-12	8.53899e-14	1.49205e-12	6.49647e-14
		20.43	2.21886e-12	1.66573e-13	1.12809e-12	8.27253e-14	1.4895e-12	6.55917e-14
		20.45	2.2143e-12	1.63087e-13	1.13742e-12	8.70236e-14	1.48717e-12	6.36159e-14
		20.47	2.2068e-12	1.64734e-13	1.12818e-12	8.6068e-14	1.48555e-12	6.42072e-14
		20.49	2.21382e-12	1.66283e-13	1.1227e-12	8.47452e-14	1.47972e-12	6.16601e-14
		20.51	2.20548e-12	1.66623e-13	1.12214e-12	8.40516e-14	1.48027e-12	6.32456e-14
		20.53	2.20415e-12	1.64951e-13	1.11834e-12	8.52274e-14	1.47739e-12	6.19033e-14
		20.55	2.20502e-12	1.64647e-13	1.1115e-12	8.35199e-14	1.4764e-12	6.33379e-14
		20.57	2.19317e-12	1.64834e-13	1.11146e-12	8.58917e-14	1.46988e-12	6.2193e-14
		20.59	2.18735e-12	1.64071e-13	1.10629e-12	8.27869e-14	1.46686e-12	6.1765e-14
		20.61	2.17135e-12	1.61281e-13	1.10115e-12	8.17667e-14	1.4676e-12	6.29831e-14
		20.63	2.18089e-12	1.63048e-13	1.09944e-12	8.06995e-14	1.45961e-12	6.22349e-14
		20.65	2.16741e-12	1.60812e-13	1.08951e-12	7.85703e-14	1.46187e-12	6.23765e-14
		20.67	2.1665e-12	1.61944e-13	1.09273e-12	7.93037e-14	1.4541e-12	6.1203e-14
		20.69	2.15005e-12	1.6166e-13	1.08682e-12	7.91311e-14	1.45419e-12	6.12098e-14
		20.71	2.15428e-12	1.61576e-13	1.08256e-12	7.91579e-14	1.4507e-12	6.20473e-14
		20.73	2.14406e-12	1.6105e-13	1.08595e-12	8.15191e-14	1.44672e-12	6.10908e-14
		20.75	2.14574e-12	1.59953e-13	1.08614e-12	8.30919e-14	1.44479e-12	6.01873e-14
		20.77	2.14212e-12	1.61442e-13	1.08753e-12	8.04813e-14	1.44524e-12	6.20699e-14
		20.79	2.1377e-12	1.59093e-13	1.07607e-12	7.60989e-14	1.4375e-12	6.05616e-14
		20.81	2.13702e-12	1.62959e-13	1.07487e-12	7.93855e-14	1.4371e-12	6.18503e-14
		20.83	2.13881e-12	1.61679e-13	1.07652e-12	7.91408e-14	1.4317e-12	6.17094e-14
		20.85	2.12771e-12	1.60894e-13	1.07142e-12	7.98145e-14	1.43201e-12	6.17712e-14
		20.87	2.11867e-12	1.58428e-13	1.06728e-12	7.97109e-14	1.43467e-12	6.04359e-14
		20.89	2.1173e-12	1.58971e-13	1.06254e-12	7.64086e-14	1.43018e-12	6.17764e-14
		20.91	2.1131e-12	1.58304e-13	1.06189e-12	7.64161e-14	1.42588e-12	6.08367e-14
		20.93	2.10506e-12	1.57177e-13	1.06023e-12	7.75884e-14	1.41954e-12	6.13166e-14
		20.95	2.09366e-12	1.55518e-13	1.05792e-12	7.80041e-14	1.41969e-12	6.14019e-14
		20.97	2.09206e-12	1.55066e-13	1.06049e-12	7.77915e-14	1.41149e-12	5.92662e-14
		20.99	2.08954e-12	1.54974e-13	1.05073e-12	7.42927e-14	1.41657e-12	6.09163e-14
		21.01	2.0852e-12	1.53701e-13	1.05388e-12	7.93515e-14	1.41032e-12	6.05637e-14
		21.03	2.08176e-12	1.54047e-13	1.04866e-12	7.5201e-14	1.40647e-12	5.89874e-14
		21.05	2.07325e-12	1.54211e-13	1.04436e-12	7.49903e-14	1.41019e-12	6.01963e-14
		21.07	2.07121e-12	1.53201e-13	1.04769e-12	7.5144e-14	1.40572e-12	5.83377e-14
		21.09	2.07442e-12	1.532e-13	1.03695e-12	7.15779e-14	1.39769e-12	5.89467e-14
		21.11	2.06149e-12	1.52421e-13	1.03788e-12	7.51455e-14	1.39845e-12	5.93656e-14
		21.13	2.05369e-12	1.52517e-13	1.03405e-12	7.07228e-14	1.403e-12	5.92823e-14
		21.15	2.05344e-12	1.54132e-13	1.03261e-12	7.11253e-14	1.39269e-12	5.85054e-14
		21.17	2.05044e-12	1.51804e-13	1.02856e-12	7.00638e-14	1.39225e-12	5.86907e-14
		21.19	2.04842e-12	1.52795e-13	1.03089e-12	7.23758e-14	1.38403e-12	5.76449e-14
		21.21	2.048e-12	1.51072e-13	1.02533e-12	7.02466e-14	1.38851e-12	5.91176e-14
		21.23
		21.25
		21.27
		21.29	2.32155e-12	1.68197e-13	1.39866e-12	1.0394e-13	1.57287e-12	7.27635e-14
		21.31	2.31259e-12	1.68301e-13	1.29795e-12	9.54916e-14	1.5646e-12	7.22865e-14
		21.33	2.31288e-12	1.68022e-13	1.24927e-12	9.26606e-14	1.56303e-12	7.10754e-14
		21.35	2.30359e-12	1.64872e-13	1.22588e-12	9.03891e-14	1.55543e-12	6.81515e-14
		21.37	2.30059e-12	1.65701e-13	1.20243e-12	8.70957e-14	1.55641e-12	6.83708e-14
		21.39	2.30281e-12	1.65554e-13	1.195e-12	8.75897e-14	1.5526e-12	6.42015e-14
		21.41	2.29544e-12	1.64777e-13	1.19085e-12	8.71571e-14	1.54676e-12	6.26013e-14
		21.43	2.29015e-12	1.6542e-13	1.17991e-12	8.44444e-14	1.55241e-12	6.44739e-14
		21.45	2.28525e-12	1.62403e-13	1.17564e-12	8.40755e-14	1.54789e-12	6.46143e-14
		21.47	2.2757e-12	1.61961e-13	1.16324e-12	8.57872e-14	1.545e-12	6.51608e-14
		21.49	2.26941e-12	1.62663e-13	1.15752e-12	8.10595e-14	1.54152e-12	6.4582e-14
		21.51	2.26834e-12	1.64091e-13	1.15542e-12	8.37045e-14	1.53422e-12	6.23016e-14
		21.53	2.26271e-12	1.6151e-13	1.15461e-12	8.40566e-14	1.53852e-12	6.30323e-14
		21.55	2.25851e-12	1.60515e-13	1.14832e-12	8.4303e-14	1.53221e-12	6.43195e-14
		21.57	2.25197e-12	1.60171e-13	1.1491e-12	8.1926e-14	1.52862e-12	6.14778e-14
		21.59	2.25063e-12	1.61102e-13	1.14122e-12	8.14958e-14	1.52511e-12	6.28573e-14
		21.61	2.24182e-12	1.60402e-13	1.13953e-12	8.31418e-14	1.52454e-12	6.24442e-14
		21.63	2.2428e-12	1.61383e-13	1.13578e-12	7.94451e-14	1.52307e-12	6.22056e-14
		21.65	2.23821e-12	1.60193e-13	1.13737e-12	7.73411e-14	1.52082e-12	6.24709e-14
		21.67	2.22662e-12	1.58452e-13	1.1296e-12	7.61928e-14	1.51631e-12	6.17902e-14
		21.69	2.22347e-12	1.59032e-13	1.1279e-12	7.82948e-14	1.51001e-12	6.02405e-14
		21.71	2.22075e-12	1.60579e-13	1.12763e-12	7.66391e-14	1.50984e-12	6.24071e-14
		21.73	2.2092e-12	1.56924e-13	1.12747e-12	8.12566e-14	1.50146e-12	6.18933e-14
		21.75	2.21069e-12	1.55831e-13	1.12126e-12	8.04372e-14	1.50608e-12	6.16614e-14
		21.77	2.20202e-12	1.56761e-13	1.11493e-12	7.58932e-14	1.49948e-12	6.02566e-14
		21.79	2.19547e-12	1.56157e-13	1.11004e-12	7.60204e-14	1.50127e-12	6.19233e-14
		21.81	2.19594e-12	1.55534e-13	1.11134e-12	7.80621e-14	1.49604e-12	6.09742e-14
		21.83	2.19105e-12	1.55755e-13	1.11111e-12	7.7948e-14	1.49188e-12	6.05954e-14
		21.85	2.18724e-12	1.55561e-13	1.10769e-12	7.80777e-14	1.48752e-12	6.15637e-14
		21.87	2.17954e-12	1.56105e-13	1.09971e-12	7.54901e-14	1.49163e-12	6.14707e-14
		21.89	2.17716e-12	1.54085e-13	1.10453e-12	7.44409e-14	1.48772e-12	6.26826e-14
		21.91	2.1804e-12	1.55808e-13	1.09958e-12	7.73802e-14	1.48051e-12	6.30963e-14
		21.93	2.17858e-12	1.5363e-13	1.09326e-12	7.41265e-14	1.48271e-12	6.32367e-14
		21.95	2.17101e-12	1.5477e-13	1.09773e-12	7.38037e-14	1.48636e-12	6.66519e-14
		21.97	2.1653e-12	1.52184e-13	1.08978e-12	7.46389e-14	1.47669e-12	6.35613e-14
		21.99	2.15652e-12	1.52147e-13	1.08778e-12	7.78345e-14	1.47443e-12	6.50049e-14
		22.01	2.14999e-12	1.51803e-13	1.08214e-12	7.42885e-14	1.47155e-12	6.29545e-14
		22.03	2.14615e-12	1.52436e-13	1.08142e-12	7.45206e-14	1.4678e-12	6.23498e-14
		22.05	2.15e-12	1.52286e-13	1.07639e-12	7.3589e-14	1.46656e-12	6.41884e-14
		22.07	2.13905e-12	1.49984e-13	1.08225e-12	7.40069e-14	1.46233e-12	6.51456e-14
		22.09	2.13195e-12	1.49361e-13	1.07023e-12	7.11408e-14	1.45864e-12	6.26421e-14
		22.11	2.12641e-12	1.50072e-13	1.07501e-12	7.18312e-14	1.45606e-12	6.23524e-14
		22.13	2.12155e-12	1.49761e-13	1.06682e-12	7.14908e-14	1.44927e-12	6.28043e-14
		22.15	2.11445e-12	1.4854e-13	1.06486e-12	7.22267e-14	1.44731e-12	6.24343e-14
		22.17	2.10763e-12	1.47491e-13	1.06425e-12	6.82858e-14	1.44975e-12	6.26134e-14
		22.19	2.10424e-12	1.489e-13	1.0613e-12	6.75302e-14	1.44641e-12	6.43993e-14
		22.21	2.10484e-12	1.46917e-13	1.06314e-12	6.892e-14	1.44352e-12	6.43804e-14
		22.23
		22.25
		22.27
		22.29	2.3771e-12	1.65207e-13	1.43043e-12	9.7452e-14	1.63542e-12	7.79261e-14
		22.31	2.37291e-12	1.67951e-13	1.33025e-12	9.1548e-14	1.62014e-12	7.65391e-14
		22.33	2.36313e-12	1.64376e-13	1.28604e-12	8.73208e-14	1.61923e-12	7.41209e-14
		22.35	2.37128e-12	1.66445e-13	1.26398e-12	8.95873e-14	1.61585e-12	7.30559e-14
		22.37	2.36669e-12	1.65008e-13	1.2405e-12	8.52185e-14	1.61143e-12	7.04428e-14
		22.39	2.36132e-12	1.65593e-13	1.23183e-12	8.53876e-14	1.61306e-12	7.04568e-14
		22.41	2.35408e-12	1.64098e-13	1.22544e-12	8.60887e-14	1.60463e-12	6.87446e-14
		22.43	2.35583e-12	1.64824e-13	1.22054e-12	8.77957e-14	1.60046e-12	6.98426e-14
		22.45	2.35153e-12	1.65237e-13	1.2113e-12	8.40463e-14	1.59958e-12	6.96699e-14
		22.47	2.34295e-12	1.62418e-13	1.20619e-12	8.57446e-14	1.59857e-12	6.76277e-14
		22.49	2.33628e-12	1.62607e-13	1.20527e-12	8.39064e-14	1.59957e-12	6.81414e-14
		22.51	2.33033e-12	1.61827e-13	1.19858e-12	8.25751e-14	1.59156e-12	6.64427e-14
		22.53	2.31799e-12	1.61301e-13	1.18896e-12	8.07385e-14	1.59099e-12	6.77971e-14
		22.55	2.30875e-12	1.61238e-13	1.18887e-12	8.22186e-14	1.58356e-12	6.66818e-14
		22.57	2.30076e-12	1.60357e-13	1.18066e-12	8.08955e-14	1.58636e-12	6.95808e-14
		22.59	2.29681e-12	1.61037e-13	1.17563e-12	8.0147e-14	1.5779e-12	6.78598e-14
		22.61	2.29402e-12	1.58638e-13	1.17536e-12	8.10247e-14	1.57934e-12	6.70271e-14
		22.63	2.28839e-12	1.58195e-13	1.1707e-12	7.85271e-14	1.57614e-12	6.81398e-14
		22.65	2.29095e-12	1.58509e-13	1.17255e-12	7.879e-14	1.56882e-12	6.64462e-14
		22.67	2.28279e-12	1.58168e-13	1.16759e-12	7.97787e-14	1.56946e-12	6.79134e-14
		22.69	2.29167e-12	1.60134e-13	1.16486e-12	7.76436e-14	1.567e-12	6.64091e-14
		22.71	2.2847e-12	1.58993e-13	1.16186e-12	7.79144e-14	1.57023e-12	6.86e-14
		22.73	2.27519e-12	1.59617e-13	1.16169e-12	7.80025e-14	1.56302e-12	6.57606e-14
		22.75	2.27154e-12	1.59487e-13	1.1566e-12	7.58096e-14	1.55745e-12	6.80509e-14
		22.77	2.26431e-12	1.57288e-13	1.15706e-12	7.88737e-14	1.5561e-12	6.82455e-14
		22.79	2.26834e-12	1.58886e-13	1.14905e-12	7.68077e-14	1.5549e-12	6.71157e-14
		22.81	2.26552e-12	1.57866e-13	1.14881e-12	7.80394e-14	1.555e-12	6.75945e-14
		22.83	2.25416e-12	1.57554e-13	1.15255e-12	7.83952e-14	1.54801e-12	6.72774e-14
		22.85	2.25365e-12	1.57579e-13	1.13863e-12	7.36499e-14	1.5426e-12	6.70224e-14
		22.87	2.23182e-12	1.55605e-13	1.14377e-12	7.8614e-14	1.54411e-12	6.55635e-14
		22.89	2.22874e-12	1.55064e-13	1.13563e-12	7.52723e-14	1.53591e-12	6.47669e-14
		22.91	2.22591e-12	1.53958e-13	1.13e-12	7.46404e-14	1.53621e-12	6.45443e-14
		22.93	2.22549e-12	1.55694e-13	1.12988e-12	7.45779e-14	1.53476e-12	6.61339e-14
		22.95	2.2203e-12	1.55075e-13	1.13161e-12	7.45697e-14	1.53572e-12	6.78827e-14
		22.97	2.21826e-12	1.55155e-13	1.12903e-12	7.41162e-14	1.5274e-12	6.72679e-14
		22.99	2.20268e-12	1.53194e-13	1.12046e-12	7.22846e-14	1.52557e-12	6.67437e-14
		23.01	2.20272e-12	1.53053e-13	1.12156e-12	7.42223e-14	1.52628e-12	6.81034e-14
		23.03	2.20503e-12	1.53701e-13	1.12069e-12	7.46456e-14	1.51893e-12	6.56728e-14
		23.05	2.19359e-12	1.52165e-13	1.12453e-12	7.38085e-14	1.518e-12	6.56565e-14
		23.07	2.19031e-12	1.52402e-13	1.1161e-12	7.39955e-14	1.51688e-12	6.93983e-14
		23.09	2.18801e-12	1.52165e-13	1.11283e-12	7.12824e-14	1.51498e-12	6.75138e-14
		23.11	2.18495e-12	1.50924e-13	1.10693e-12	6.84654e-14	1.50988e-12	6.64074e-14
		23.13	2.18061e-12	1.51013e-13	1.11065e-12	7.13208e-14	1.50858e-12	6.69288e-14
		23.15	2.17366e-12	1.49654e-13	1.10586e-12	7.15767e-14	1.5031e-12	6.67063e-14
		23.17	2.17321e-12	1.5015e-13	1.1011e-12	6.92611e-14	1.50104e-12	6.58238e-14
		23.19	2.15703e-12	1.48168e-13	1.10343e-12	6.97897e-14	1.5007e-12	6.56896e-14
		23.21	2.16212e-12	1.4942e-13	1.10673e-12	7.37294e-14	1.49532e-12	6.752e-14
		23.23
		23.25
		23.27
		23.29	2.44162e-12	1.65844e-13	1.46969e-12	1.00144e-13	1.68298e-12	7.93832e-14
		23.31	2.42646e-12	1.66443e-13	1.36568e-12	9.24006e-14	1.66833e-12	7.59667e-14
		23.33	2.43567e-12	1.67986e-13	1.32355e-12	9.43974e-14	1.67022e-12	7.86703e-14
		23.35	2.43091e-12	1.67217e-13	1.29511e-12	8.62125e-14	1.67026e-12	7.52342e-14
		23.37	2.42847e-12	1.67452e-13	1.28147e-12	8.96153e-14	1.66518e-12	7.34662e-14
		23.39	2.42024e-12	1.63961e-13	1.27707e-12	9.08836e-14	1.66193e-12	7.3155e-14
		23.41	2.42262e-12	1.64737e-13	1.2552e-12	8.75665e-14	1.65626e-12	7.22486e-14
		23.43	2.41601e-12	1.64521e-13	1.25064e-12	8.67245e-14	1.66294e-12	7.17596e-14
		23.45	2.41547e-12	1.67113e-13	1.24876e-12	8.60428e-14	1.65587e-12	7.17368e-14
		23.47	2.40296e-12	1.64756e-13	1.24094e-12	8.38947e-14	1.65243e-12	7.02757e-14
		23.49	2.408e-12	1.6582e-13	1.23754e-12	8.48365e-14	1.65017e-12	6.97942e-14
		23.51	2.40439e-12	1.65989e-13	1.23364e-12	8.59438e-14	1.65311e-12	7.24329e-14
		23.53	2.38979e-12	1.65624e-13	1.23145e-12	8.72012e-14	1.64525e-12	7.07724e-14
		23.55	2.39114e-12	1.63508e-13	1.22296e-12	8.38882e-14	1.63626e-12	6.94348e-14
		23.57	2.38977e-12	1.64373e-13	1.22384e-12	8.33148e-14	1.64075e-12	6.95057e-14
		23.59	2.38139e-12	1.62182e-13	1.21867e-12	8.21867e-14	1.63517e-12	7.05042e-14
		23.61	2.37538e-12	1.61216e-13	1.20731e-12	8.02612e-14	1.63121e-12	6.9865e-14
		23.63	2.38908e-12	1.64783e-13	1.21203e-12	8.55108e-14	1.63665e-12	7.14037e-14
		23.65	2.36737e-12	1.63325e-13	1.20421e-12	8.14823e-14	1.63008e-12	6.95763e-14
		23.67	2.36367e-12	1.61684e-13	1.20934e-12	8.5375e-14	1.63159e-12	6.98959e-14
		23.69	2.36072e-12	1.63704e-13	1.20996e-12	8.32769e-14	1.62333e-12	7.09252e-14
		23.71	2.36155e-12	1.65003e-13	1.19845e-12	8.17916e-14	1.61996e-12	7.07509e-14
		23.73	2.3485e-12	1.60249e-13	1.19941e-12	8.19149e-14	1.61964e-12	7.21226e-14
		23.75	2.33785e-12	1.59876e-13	1.19607e-12	8.02631e-14	1.61204e-12	7.05473e-14
		23.77	2.3417e-12	1.61251e-13	1.19499e-12	8.14624e-14	1.60957e-12	7.15729e-14
		23.79	2.32725e-12	1.59943e-13	1.19189e-12	7.94384e-14	1.6095e-12	7.04117e-14
		23.81	2.32731e-12	1.58757e-13	1.18805e-12	7.60097e-14	1.6031e-12	7.1141e-14
		23.83	2.31985e-12	1.59684e-13	1.18379e-12	7.71675e-14	1.6034e-12	7.32844e-14
		23.85	2.30985e-12	1.5801e-13	1.18038e-12	7.81512e-14	1.59378e-12	7.13032e-14
		23.87	2.30002e-12	1.54805e-13	1.18309e-12	7.96654e-14	1.59388e-12	7.29663e-14
		23.89	2.30373e-12	1.56438e-13	1.17942e-12	7.93331e-14	1.59542e-12	7.21015e-14
		23.91	2.29517e-12	1.53442e-13	1.17499e-12	8.00713e-14	1.5914e-12	7.37486e-14
		23.93	2.2907e-12	1.54367e-13	1.16745e-12	7.65124e-14	1.5899e-12	7.52612e-14
		23.95	2.28614e-12	1.55345e-13	1.16851e-12	7.71834e-14	1.58508e-12	7.03082e-14
		23.97	2.27716e-12	1.53694e-13	1.17327e-12	7.82657e-14	1.58228e-12	7.22094e-14
		23.99	2.26814e-12	1.53834e-13	1.16316e-12	7.55603e-14	1.57908e-12	7.29221e-14
		24.01	2.26741e-12	1.52409e-13	1.16365e-12	7.822e-14	1.57445e-12	7.15048e-14
		24.03	2.26597e-12	1.52162e-13	1.16147e-12	7.53512e-14	1.57711e-12	7.24403e-14
		24.05	2.25582e-12	1.51572e-13	1.15632e-12	7.60442e-14	1.57237e-12	7.22127e-14
		24.07	2.25331e-12	1.51738e-13	1.15758e-12	7.68459e-14	1.56821e-12	7.11026e-14
		24.09	2.2499e-12	1.5236e-13	1.14696e-12	7.47713e-14	1.56722e-12	7.04465e-14
		24.11	2.24264e-12	1.5135e-13	1.15311e-12	7.57407e-14	1.5601e-12	7.20721e-14
		24.13	2.24277e-12	1.50505e-13	1.14816e-12	7.58342e-14	1.55967e-12	6.97642e-14
		24.15	2.23388e-12	1.5024e-13	1.14695e-12	7.44874e-14	1.55823e-12	7.18212e-14
		24.17	2.2291e-12	1.51605e-13	1.1429e-12	7.37403e-14	1.5592e-12	7.25597e-14
		24.19	2.22848e-12	1.50664e-13	1.143e-12	7.39381e-14	1.55608e-12	6.93624e-14
		24.21	2.22262e-12	1.4968e-13	1.14367e-12	7.40829e-14	1.54932e-12	7.00369e-14
		24.23
		24.25
		24.27
		24.29	2.49822e-12	1.64981e-13	1.51547e-12	1.07924e-13	1.73795e-12	8.31582e-14
		24.31	2.49113e-12	1.64682e-13	1.40555e-12	9.76587e-14	1.72409e-12	8.1646e-14
		24.33	2.48308e-12	1.64116e-13	1.36178e-12	9.4574e-14	1.72373e-12	7.98502e-14
		24.35	2.47937e-12	1.62639e-13	1.34069e-12	9.44132e-14	1.72073e-12	7.94933e-14
		24.37	2.4817e-12	1.62775e-13	1.32817e-12	9.4553e-14	1.71977e-12	7.81013e-14
		24.39	2.47974e-12	1.62747e-13	1.31312e-12	9.16534e-14	1.71715e-12	7.63138e-14
		24.41	2.47463e-12	1.60927e-13	1.30581e-12	8.95838e-14	1.71956e-12	7.56731e-14
		24.43	2.46852e-12	1.63861e-13	1.295e-12	8.84389e-14	1.70692e-12	7.43918e-14
		24.45	2.46863e-12	1.62352e-13	1.28913e-12	8.61724e-14	1.71183e-12	7.50874e-14
		24.47	2.46457e-12	1.61983e-13	1.29051e-12	8.78593e-14	1.70912e-12	7.56301e-14
		24.49	2.45642e-12	1.62771e-13	1.2867e-12	8.89915e-14	1.70609e-12	7.53642e-14
		24.51	2.45987e-12	1.64067e-13	1.27748e-12	8.76001e-14	1.7028e-12	7.57487e-14
		24.53	2.44883e-12	1.61973e-13	1.27732e-12	8.87315e-14	1.70522e-12	7.72802e-14
		24.55	2.44772e-12	1.62539e-13	1.27049e-12	8.52904e-14	1.69637e-12	7.42245e-14
		24.57	2.44296e-12	1.62147e-13	1.26772e-12	8.64759e-14	1.69157e-12	7.16903e-14
		24.59	2.43247e-12	1.6219e-13	1.26259e-12	8.40573e-14	1.69349e-12	7.42287e-14
		24.61	2.43007e-12	1.61213e-13	1.26002e-12	8.38756e-14	1.69027e-12	7.45837e-14
		24.63	2.43003e-12	1.6044e-13	1.25322e-12	8.27465e-14	1.68618e-12	7.38361e-14
		24.65	2.42743e-12	1.62357e-13	1.25079e-12	8.2741e-14	1.68583e-12	7.5299e-14
		24.67	2.4189e-12	1.61464e-13	1.25403e-12	8.52807e-14	1.67875e-12	7.49081e-14
		24.69	2.41015e-12	1.61001e-13	1.24926e-12	8.53645e-14	1.68186e-12	7.32869e-14
		24.71	2.41266e-12	1.6068e-13	1.24033e-12	8.28998e-14	1.67684e-12	7.39913e-14
		24.73	2.40133e-12	1.5899e-13	1.2435e-12	8.41649e-14	1.67317e-12	7.66427e-14
		24.75	2.4039e-12	1.59689e-13	1.24664e-12	8.71241e-14	1.66952e-12	7.6347e-14
		24.77	2.39417e-12	1.58573e-13	1.23573e-12	8.12326e-14	1.66934e-12	7.46321e-14
		24.79	2.38191e-12	1.58887e-13	1.23764e-12	8.45408e-14	1.6691e-12	7.54703e-14
		24.81	2.38079e-12	1.60355e-13	1.22748e-12	8.14702e-14	1.66114e-12	7.4367e-14
		24.83	2.37566e-12	1.58387e-13	1.23338e-12	8.15446e-14	1.65839e-12	7.41293e-14
		24.85	2.37194e-12	1.56757e-13	1.22718e-12	8.2057e-14	1.66061e-12	7.46572e-14
		24.87	2.36774e-12	1.57205e-13	1.22481e-12	8.09798e-14	1.655e-12	7.25519e-14
		24.89	2.36269e-12	1.57612e-13	1.22755e-12	8.01905e-14	1.65985e-12	7.69309e-14
		24.91	2.35565e-12	1.58639e-13	1.22466e-12	8.25357e-14	1.65464e-12	7.46592e-14
		24.93	2.34804e-12	1.5717e-13	1.21951e-12	8.10616e-14	1.64913e-12	7.40777e-14
		24.95	2.34567e-12	1.56977e-13	1.21732e-12	8.10405e-14	1.64529e-12	7.43481e-14
		24.97	2.33869e-12	1.54927e-13	1.21504e-12	8.16034e-14	1.64519e-12	7.39133e-14
		24.99	2.33937e-12	1.556e-13	1.21971e-12	8.01749e-14	1.63965e-12	7.39849e-14
		25.01	2.32895e-12	1.54e-13	1.21453e-12	8.06925e-14	1.63573e-12	7.28797e-14
		25.03	2.31573e-12	1.54279e-13	1.21513e-12	7.88894e-14	1.63463e-12	7.43292e-14
		25.05	2.31933e-12	1.53844e-13	1.21124e-12	7.97052e-14	1.63404e-12	7.54058e-14
		25.07	2.31272e-12	1.53571e-13	1.20524e-12	7.84564e-14	1.63001e-12	7.31029e-14
		25.09	2.31052e-12	1.52796e-13	1.20369e-12	8.06148e-14	1.62612e-12	7.23127e-14
		25.11	2.29996e-12	1.53449e-13	1.20344e-12	8.02948e-14	1.62697e-12	7.37955e-14
		25.13	2.29777e-12	1.52055e-13	1.19715e-12	7.67762e-14	1.62183e-12	7.15907e-14
		25.15	2.28797e-12	1.51794e-13	1.19659e-12	7.8971e-14	1.61961e-12	7.24285e-14
		25.17	2.29045e-12	1.50608e-13	1.18822e-12	7.68728e-14	1.61935e-12	7.53206e-14
		25.19	2.2845e-12	1.51407e-13	1.18831e-12	7.78825e-14	1.61504e-12	7.268e-14
		25.21	2.2757e-12	1.50876e-13	1.1827e-12	7.46803e-14	1.61576e-12	7.43277e-14
		25.23	2.27387e-12	1.51281e-13	1.18403e-12	7.70667e-14	1.61424e-12	7.44406e-14
		25.25	2.26742e-12	1.51037e-13	1.18534e-12	7.41813e-14	1.60855e-12	7.44271e-14
		25.27	2.26098e-12	1.50466e-13	1.18438e-12	7.59012e-14	1.60154e-12	7.30157e-14
		25.29	2.25805e-12	1.51434e-13	1.18184e-12	7.59185e-14	1.60617e-12	7.40963e-14
		25.31	2.25952e-12	1.49463e-13	1.17562e-12	7.40189e-14	1.60259e-12	7.17702e-14
		25.33	2.25624e-12	1.49072e-13	1.16805e-12	7.43537e-14	1.60082e-12	7.29897e-14
		25.35	2.25713e-12	1.48894e-13	1.17578e-12	7.35655e-14	1.59753e-12	7.21083e-14
		25.37	2.25091e-12	1.48127e-13	1.18016e-12	7.59334e-14	1.59251e-12	7.32546e-14
		25.39	2.24749e-12	1.47832e-13	1.16806e-12	7.11965e-14	1.5954e-12	7.38397e-14
		25.41	2.23923e-12	1.47705e-13	1.17493e-12	7.50674e-14	1.58601e-12	7.16364e-14
		25.43	2.23007e-12	1.47335e-13	1.16642e-12	7.28691e-14	1.58498e-12	7.22956e-14
		25.45	2.22934e-12	1.47294e-13	1.16488e-12	7.28337e-14	1.58069e-12	7.35179e-14
		25.47	2.22679e-12	1.48219e-13	1.16342e-12	7.2223e-14	1.57917e-12	7.30457e-14
		25.49	2.22026e-12	1.47161e-13	1.15947e-12	7.0798e-14	1.58083e-12	7.30179e-14
		25.51	2.21945e-12	1.45678e-13	1.15712e-12	7.11693e-14	1.5774e-12	7.24108e-14
		25.53	2.21843e-12	1.45854e-13	1.15425e-12	7.17477e-14	1.56962e-12	7.31206e-14
		25.55	2.21722e-12	1.45395e-13	1.14844e-12	7.38909e-14	1.57258e-12	7.28564e-14
		25.57	2.20491e-12	1.44604e-13	1.14715e-12	7.29714e-14	1.57433e-12	7.39799e-14
		25.59	2.21075e-12	1.43916e-13	1.14645e-12	7.16845e-14	1.56555e-12	7.32379e-14
		25.61	2.20567e-12	1.45637e-13	1.15135e-12	7.32251e-14	1.5681e-12	7.46058e-14
		25.63	2.19947e-12	1.45308e-13	1.15005e-12	7.51689e-14	1.56777e-12	7.40136e-14
		25.65	2.19736e-12	1.44216e-13	1.14393e-12	6.94349e-14	1.55896e-12	7.45072e-14
		25.67	2.1921e-12	1.46241e-13	1.14364e-12	7.064e-14	1.56247e-12	7.35628e-14
		25.69	2.18945e-12	1.43715e-13	1.13852e-12	6.91532e-14	1.55644e-12	7.32879e-14
		25.71	2.18977e-12	1.45538e-13	1.13928e-12	7.29124e-14	1.56075e-12	7.33813e-14
		25.73	2.18004e-12	1.45183e-13	1.13781e-12	7.25801e-14	1.55326e-12	7.34137e-14
		25.75	2.17643e-12	1.44759e-13	1.13457e-12	7.01866e-14	1.54817e-12	7.17111e-14
		25.77	2.17774e-12	1.44508e-13	1.14094e-12	7.50318e-14	1.54993e-12	7.37135e-14
		25.79	2.17698e-12	1.44043e-13	1.13722e-12	7.08978e-14	1.54393e-12	7.0016e-14
		25.81	2.17241e-12	1.42592e-13	1.13242e-12	7.42012e-14	1.54259e-12	7.21428e-14
		25.83	2.17159e-12	1.43571e-13	1.1335e-12	7.19627e-14	1.54103e-12	7.38153e-14
		25.85	2.1655e-12	1.43118e-13	1.12742e-12	7.05339e-14	1.54018e-12	7.14674e-14
		25.87	2.16192e-12	1.43096e-13	1.12472e-12	7.02635e-14	1.54082e-12	7.33728e-14
		25.89	2.16472e-12	1.44362e-13	1.12563e-12	7.07917e-14	1.54208e-12	7.13593e-14
		25.91	2.15857e-12	1.44384e-13	1.11647e-12	6.59269e-14	1.53769e-12	7.34835e-14
		25.93	2.15158e-12	1.42668e-13	1.12173e-12	7.08369e-14	1.53193e-12	7.02799e-14
		25.95	2.14824e-12	1.43464e-13	1.12262e-12	6.92352e-14	1.53274e-12	7.34854e-14
		25.97	2.14641e-12	1.4317e-13	1.12471e-12	7.1643e-14	1.53083e-12	7.3126e-14
		25.99	2.14681e-12	1.42794e-13	1.1207e-12	6.86289e-14	1.52758e-12	7.18403e-14
		26.01	2.14359e-12	1.4146e-13	1.1197e-12	7.02725e-14	1.52732e-12	7.44451e-14
		26.03	2.14158e-12	1.41738e-13	1.11802e-12	7.17429e-14	1.53026e-12	7.48146e-14
		26.05	2.13726e-12	1.4125e-13	1.11303e-12	6.90928e-14	1.52572e-12	7.03212e-14
		26.07	2.13557e-12	1.40698e-13	1.11028e-12	7.02882e-14	1.52575e-12	7.31213e-14
		26.09	2.12956e-12	1.39685e-13	1.10906e-12	6.66015e-14	1.52211e-12	7.29762e-14
		26.11	2.12907e-12	1.40708e-13	1.1133e-12	6.94255e-14	1.52e-12	7.37927e-14
		26.13	2.1294e-12	1.40339e-13	1.11038e-12	7.37288e-14	1.52142e-12	7.38733e-14
		26.15	2.12141e-12	1.40249e-13	1.111e-12	7.09111e-14	1.52014e-12	7.37526e-14
		26.17	2.12086e-12	1.40326e-13	1.10371e-12	6.87345e-14	1.5146e-12	7.36014e-14
		26.19	2.11764e-12	1.39681e-13	1.10662e-12	7.15695e-14	1.51349e-12	7.32156e-14
		26.21	2.11472e-12	1.40442e-13	1.1007e-12	6.96705e-14	1.51312e-12	7.39068e-14
		26.23	2.10905e-12	1.40051e-13	1.10632e-12	7.01455e-14	1.51141e-12	7.36162e-14
		26.25	2.10146e-12	1.39514e-13	1.10196e-12	7.08796e-14	1.51356e-12	7.43641e-14
		26.27	2.10555e-12	1.38441e-13	1.10233e-12	7.13008e-14	1.51055e-12	7.40337e-14
		26.29	2.1057e-12	1.38999e-13	1.09887e-12	6.9356e-14	1.50562e-12	7.5197e-14
		26.31	2.09694e-12	1.39446e-13	1.09818e-12	7.05671e-14	1.50249e-12	7.42605e-14
		26.33	2.09331e-12	1.38134e-13	1.09871e-12	7.11073e-14	1.50703e-12	7.49227e-14
		26.35	2.08941e-12	1.38425e-13	1.09283e-12	6.85742e-14	1.50207e-12	7.27785e-14
		26.37	2.08731e-12	1.37547e-13	1.09675e-12	7.09126e-14	1.50052e-12	7.33411e-14
		26.39	2.08239e-12	1.38681e-13	1.08992e-12	6.86972e-14	1.50476e-12	7.32386e-14
		26.41	2.08506e-12	1.37617e-13	1.09185e-12	6.99072e-14	1.50162e-12	7.23152e-14
		26.43	2.08091e-12	1.37467e-13	1.0908e-12	7.01216e-14	1.49717e-12	7.24265e-14
		26.45	2.07947e-12	1.38558e-13	1.08992e-12	7.06451e-14	1.50111e-12	7.54788e-14
		26.47	2.08043e-12	1.37317e-13	1.08189e-12	6.80886e-14	1.49223e-12	7.12859e-14
		26.49	2.07955e-12	1.38495e-13	1.08556e-12	6.91215e-14	1.49805e-12	7.55476e-14
		26.51	2.06806e-12	1.36796e-13	1.07895e-12	6.65014e-14	1.49272e-12	7.28403e-14
		26.53	2.07115e-12	1.36465e-13	1.08821e-12	6.87307e-14	1.4894e-12	7.19321e-14
		26.55	2.06705e-12	1.36823e-13	1.08405e-12	7.06334e-14	1.48853e-12	7.39147e-14
		26.57	2.05628e-12	1.36426e-13	1.08132e-12	6.86427e-14	1.47803e-12	7.12157e-14
		26.59	2.05811e-12	1.37269e-13	1.08183e-12	7.12479e-14	1.48519e-12	7.2216e-14
		26.61	2.05192e-12	1.34713e-13	1.07877e-12	7.14948e-14	1.48617e-12	7.27765e-14
		26.63	2.0521e-12	1.35624e-13	1.08284e-12	7.13437e-14	1.4799e-12	7.12612e-14
		26.65	2.04914e-12	1.35376e-13	1.07968e-12	7.27437e-14	1.47996e-12	7.32364e-14
		26.67	2.04767e-12	1.34899e-13	1.07465e-12	6.94779e-14	1.47591e-12	7.10304e-14
		26.69	2.04727e-12	1.34668e-13	1.07802e-12	7.1839e-14	1.469e-12	7.06525e-14
		26.71	2.04179e-12	1.34548e-13	1.06583e-12	6.60655e-14	1.47641e-12	7.2252e-14
		26.73	2.03873e-12	1.33589e-13	1.0661e-12	6.74829e-14	1.47249e-12	7.04431e-14
		26.75	2.03638e-12	1.33584e-13	1.06934e-12	6.91736e-14	1.47511e-12	7.21222e-14
		26.77	2.03744e-12	1.33851e-13	1.06672e-12	6.61076e-14	1.46661e-12	7.08827e-14
		26.79	2.03332e-12	1.33954e-13	1.06621e-12	6.61151e-14	1.47181e-12	7.03176e-14
		26.81	2.03445e-12	1.31856e-13	1.06691e-12	6.87773e-14	1.47647e-12	7.03604e-14
		26.83	2.02856e-12	1.3301e-13	1.06712e-12	7.13145e-14	1.4675e-12	6.82293e-14
		26.85	2.02311e-12	1.33174e-13	1.06537e-12	6.51229e-14	1.47329e-12	7.13753e-14
		26.87	2.01718e-12	1.33239e-13	1.06161e-12	6.55115e-14	1.46722e-12	7.05899e-14
		26.89	2.01354e-12	1.31292e-13	1.05667e-12	6.45375e-14	1.46284e-12	6.79484e-14
		26.91	2.01417e-12	1.33289e-13	1.05607e-12	6.47908e-14	1.46402e-12	6.95598e-14
		26.93	2.01505e-12	1.31132e-13	1.05732e-12	6.74432e-14	1.45851e-12	6.81119e-14
		26.95	2.0123e-12	1.32103e-13	1.05516e-12	6.46449e-14	1.46203e-12	6.93288e-14
		26.97	2.00457e-12	1.2991e-13	1.06484e-12	6.83064e-14	1.45227e-12	6.6841e-14
		26.99	2.00822e-12	1.31801e-13	1.05629e-12	6.58468e-14	1.45932e-12	6.86462e-14
		27.01	2.00601e-12	1.30526e-13	1.05948e-12	6.67978e-14	1.45426e-12	6.86371e-14
		27.03	2.00146e-12	1.30652e-13	1.05081e-12	6.67961e-14	1.45379e-12	6.77707e-14
		27.05	1.99799e-12	1.29962e-13	1.05121e-12	6.58465e-14	1.44897e-12	6.80882e-14
		27.07	1.99998e-12	1.30741e-13	1.0542e-12	6.77638e-14	1.4502e-12	6.64297e-14
		27.09	1.99085e-12	1.30364e-13	1.05059e-12	6.54607e-14	1.44919e-12	6.92706e-14
		27.11	1.99199e-12	1.30236e-13	1.04973e-12	6.71798e-14	1.44557e-12	6.96191e-14
		27.13	1.99078e-12	1.303e-13	1.04995e-12	6.58899e-14	1.44418e-12	6.58358e-14
		27.15	1.98842e-12	1.30074e-13	1.04908e-12	6.70399e-14	1.44817e-12	6.88551e-14
		27.17	1.98741e-12	1.29965e-13	1.04203e-12	6.39999e-14	1.44442e-12	7.06917e-14
		27.19	1.98408e-12	1.31399e-13	1.05358e-12	6.95264e-14	1.43855e-12	6.89725e-14
		27.21	1.98543e-12	1.28769e-13	1.04551e-12	6.68754e-14	1.43898e-12	6.80336e-14
		27.23	1.98572e-12	1.29601e-13	1.04973e-12	6.91088e-14	1.43633e-12	6.90092e-14
		27.25	1.98049e-12	1.30803e-13	1.04994e-12	6.62728e-14	1.43908e-12	6.95922e-14
		27.27	1.97428e-12	1.29763e-13	1.04084e-12	6.61128e-14	1.44209e-12	6.99002e-14
		27.29	1.97202e-12	1.28825e-13	1.0396e-12	6.73957e-14	1.43749e-12	6.74429e-14
		27.31	1.96882e-12	1.29001e-13	1.04661e-12	6.83752e-14	1.43826e-12	6.71829e-14
		27.33	1.96878e-12	1.26658e-13	1.04077e-12	6.69901e-14	1.43683e-12	6.77606e-14
		27.35	1.96435e-12	1.28719e-13	1.03667e-12	6.50599e-14	1.43874e-12	7.09307e-14
		27.37	1.96668e-12	1.28703e-13	1.0468e-12	6.7721e-14	1.43401e-12	7.02803e-14
		27.39	1.96325e-12	1.30039e-13	1.03817e-12	6.5746e-14	1.42957e-12	6.83397e-14
		27.41	1.96912e-12	1.28088e-13	1.03909e-12	6.88778e-14	1.43237e-12	7.11584e-14
		27.43	1.95869e-12	1.28555e-13	1.03091e-12	6.55617e-14	1.42889e-12	6.96083e-14
		27.45	1.95611e-12	1.266e-13	1.03172e-12	6.79266e-14	1.4273e-12	7.06205e-14
		27.47	1.95099e-12	1.28364e-13	1.03543e-12	6.69512e-14	1.42482e-12	6.76847e-14
		27.49	1.95142e-12	1.28374e-13	1.02661e-12	6.43794e-14	1.42203e-12	6.90598e-14
		27.51	1.94531e-12	1.27032e-13	1.03236e-12	6.62942e-14	1.42385e-12	6.94931e-14
		27.53	1.94656e-12	1.27019e-13	1.03074e-12	6.67977e-14	1.4242e-12	6.83182e-14
		27.55	1.94088e-12	1.2694e-13	1.02418e-12	6.45386e-14	1.42375e-12	6.96294e-14
		27.57	1.9424e-12	1.26768e-13	1.03019e-12	6.57582e-14	1.41727e-12	7.07241e-14
		27.59	1.93921e-12	1.27728e-13	1.03036e-12	6.57771e-14	1.42004e-12	7.256e-14
		27.61	1.93804e-12	1.26113e-13	1.029e-12	6.44115e-14	1.41822e-12	7.20549e-14
		27.63	1.93314e-12	1.264e-13	1.01964e-12	6.34638e-14	1.41378e-12	7.06848e-14
		27.65	1.92442e-12	1.26974e-13	1.0186e-12	6.67821e-14	1.41153e-12	6.98356e-14
		27.67	1.92695e-12	1.26839e-13	1.02178e-12	6.90496e-14	1.41289e-12	7.33728e-14
		27.69	1.92073e-12	1.28975e-13	1.0231e-12	6.79145e-14	1.41808e-12	7.04612e-14
		27.71	1.92846e-12	1.28689e-13	1.02277e-12	6.58361e-14	1.41055e-12	7.00998e-14
		27.73	1.9234e-12	1.26425e-13	1.02144e-12	6.60054e-14	1.41087e-12	7.22456e-14
		27.75	1.9169e-12	1.26894e-13	1.01974e-12	6.49328e-14	1.40721e-12	6.88158e-14
		27.77	1.92001e-12	1.26929e-13	1.02361e-12	6.81603e-14	1.40687e-12	7.13139e-14
		27.79	1.92088e-12	1.26361e-13	1.02382e-12	6.66888e-14	1.40005e-12	7.02769e-14
		27.81	1.91689e-12	1.25897e-13	1.01697e-12	6.49628e-14	1.40396e-12	7.15465e-14
		27.83	1.90968e-12	1.27702e-13	1.01826e-12	6.60054e-14	1.39922e-12	7.04953e-14
		27.85	1.9109e-12	1.2676e-13	1.01943e-12	6.6966e-14	1.40101e-12	6.9725e-14
		27.87	1.90905e-12	1.27586e-13	1.01846e-12	6.4275e-14	1.40156e-12	7.15317e-14
		27.89	1.90616e-12	1.2484e-13	1.02368e-12	6.79869e-14	1.38991e-12	7.26484e-14
		27.91	1.90109e-12	1.25172e-13	1.01112e-12	6.49307e-14	1.39677e-12	7.16936e-14
		27.93	1.89983e-12	1.26366e-13	1.01202e-12	6.53159e-14	1.38941e-12	7.13245e-14
		27.95	1.89908e-12	1.26261e-13	1.01056e-12	6.51453e-14	1.39892e-12	7.09221e-14
		27.97	1.90058e-12	1.25669e-13	1.00924e-12	6.62167e-14	1.39532e-12	7.12927e-14
		27.99	1.89439e-12	1.25849e-13	1.00728e-12	6.50289e-14	1.3932e-12	6.876e-14
		28.01	1.89771e-12	1.27756e-13	1.01266e-12	6.7599e-14	1.39117e-12	7.01685e-14
		28.03	1.88896e-12	1.25885e-13	1.00858e-12	6.65604e-14	1.38729e-12	6.99396e-14
		28.05	1.88736e-12	1.27104e-13	1.00326e-12	6.37036e-14	1.38532e-12	7.00845e-14
		28.07	1.89159e-12	1.27093e-13	1.00842e-12	6.87267e-14	1.38287e-12	7.05076e-14
		28.09	1.8844e-12	1.26116e-13	1.00307e-12	6.41644e-14	1.38482e-12	7.04357e-14
		28.11	1.88499e-12	1.25685e-13	1.01036e-12	7.04196e-14	1.38242e-12	6.73688e-14
		28.13	1.87939e-12	1.25202e-13	1.00855e-12	6.59061e-14	1.38339e-12	6.95148e-14
		28.15	1.87835e-12	1.25052e-13	9.99842e-13	6.5955e-14	1.3821e-12	7.04125e-14
		28.17	1.88091e-12	1.26252e-13	1.00439e-12	6.80577e-14	1.38208e-12	6.97437e-14
		28.19	1.87321e-12	1.25487e-13	1.00045e-12	6.76551e-14	1.37675e-12	7.09087e-14
		28.21	1.87241e-12	1.25646e-13	1.00003e-12	6.82919e-14	1.37961e-12	6.96259e-14
		28.23	1.87411e-12	1.24729e-13	9.99003e-13	6.68407e-14	1.37242e-12	7.03124e-14
		28.25	1.87251e-12	1.22526e-13	1.00378e-12	6.63015e-14	1.37435e-12	6.79569e-14
		28.27	1.86842e-12	1.23544e-13	9.9771e-13	6.54712e-14	1.36781e-12	6.79554e-14
		28.29	1.86787e-12	1.23217e-13	9.95713e-13	6.66393e-14	1.36573e-12	6.92655e-14
		28.31	1.8646e-12	1.21896e-13	9.94555e-13	6.39843e-14	1.36793e-12	7.02957e-14
		28.33	1.86283e-12	1.24364e-13	9.999e-13	6.55269e-14	1.36461e-12	6.95843e-14
		28.35	1.86419e-12	1.2361e-13	9.97694e-13	6.73927e-14	1.36788e-12	6.90919e-14
		28.37	1.86712e-12	1.23322e-13	1.00207e-12	7.04755e-14	1.36586e-12	6.95567e-14
		28.39	1.86229e-12	1.23814e-13	9.9117e-13	6.56787e-14	1.36144e-12	6.84917e-14
		28.41	1.863e-12	1.2306e-13	9.92443e-13	6.51561e-14	1.34469e-12	6.94771e-14
		28.43	1.86131e-12	1.21757e-13	9.93961e-13	6.3532e-14	1.34907e-12	6.85878e-14
		28.45	1.85269e-12	1.23956e-13	9.948e-13	6.77122e-14	1.34622e-12	6.66593e-14
		28.47	1.85779e-12	1.22452e-13	9.9665e-13	6.7396e-14	1.34438e-12	6.9308e-14
		28.49	1.85242e-12	1.21387e-13	9.91543e-13	6.47089e-14	1.33887e-12	6.86719e-14
		28.51	1.85311e-12	1.21968e-13	9.87717e-13	6.34751e-14	1.33479e-12	6.74032e-14
		28.53	1.85981e-12	1.20422e-13	9.9134e-13	6.39747e-14	1.33761e-12	7.11081e-14
		28.55	1.84779e-12	1.19937e-13	9.85987e-13	6.52583e-14	1.33351e-12	6.87346e-14
		28.57	1.84537e-12	1.19269e-13	1.00417e-12	6.527e-14	1.32995e-12	7.12502e-14
		28.59	1.84154e-12	1.20797e-13	9.93593e-13	6.31097e-14	1.32652e-12	6.93709e-14
		28.61	1.8405e-12	1.20009e-13	9.8113e-13	6.20588e-14	1.33252e-12	6.95192e-14
		28.63	1.84122e-12	1.20266e-13	9.88194e-13	6.52109e-14	1.32188e-12	6.84511e-14
		28.65	1.83898e-12	1.22146e-13	9.80722e-13	6.34925e-14	1.32466e-12	6.83184e-14
		28.67	1.83977e-12	1.19531e-13	9.8248e-13	6.46293e-14	1.31614e-12	6.7663e-14
		28.69	1.8403e-12	1.21037e-13	9.82466e-13	6.60011e-14	1.32163e-12	6.72028e-14
		28.71	1.83613e-12	1.21597e-13	9.77869e-13	6.44991e-14	1.31551e-12	6.89128e-14
		28.73	1.83444e-12	1.19615e-13	9.82125e-13	6.60489e-14	1.3232e-12	6.89894e-14
		28.75	1.83128e-12	1.19914e-13	9.73198e-13	6.43481e-14	1.31522e-12	6.83856e-14
		28.77	1.83443e-12	1.19521e-13	9.7688e-13	6.72745e-14	1.311e-12	6.66105e-14
		28.79	1.82637e-12	1.20308e-13	9.84179e-13	6.67515e-14	1.31599e-12	6.86137e-14
		28.81	1.82924e-12	1.18903e-13	9.73564e-13	6.15108e-14	1.3118e-12	6.83459e-14
		28.83	1.82622e-12	1.21023e-13	9.75339e-13	6.5475e-14	1.31259e-12	6.69105e-14
		28.85	1.82502e-12	1.2026e-13	9.79157e-13	6.41632e-14	1.30666e-12	6.62898e-14
		28.87	1.82224e-12	1.19336e-13	9.766e-13	6.57318e-14	1.31038e-12	6.88437e-14
		28.89	1.82038e-12	1.19088e-13	9.72946e-13	6.54762e-14	1.30724e-12	6.82245e-14
		28.91	1.8126e-12	1.19971e-13	9.69782e-13	6.172e-14	1.3038e-12	6.56504e-14
		28.93	1.81025e-12	1.19483e-13	9.70062e-13	6.75804e-14	1.30669e-12	6.83632e-14
		28.95	1.81109e-12	1.16756e-13	9.70643e-13	6.58058e-14	1.30495e-12	6.59645e-14
		28.97	1.8076e-12	1.20058e-13	9.73998e-13	6.88956e-14	1.30225e-12	6.71485e-14
		28.99	1.80732e-12	1.19864e-13	9.68079e-13	6.51932e-14	1.29911e-12	6.60343e-14
		29.01	1.80593e-12	1.18394e-13	9.71857e-13	6.59623e-14	1.29709e-12	6.73316e-14
		29.03	1.80563e-12	1.19177e-13	9.68719e-13	6.68242e-14	1.30048e-12	6.53906e-14
		29.05	1.80456e-12	1.19898e-13	9.65962e-13	6.60884e-14	1.29988e-12	6.69645e-14
		29.07	1.80055e-12	1.18853e-13	9.61516e-13	6.26461e-14	1.29856e-12	6.62886e-14
		29.09	1.80373e-12	1.18106e-13	9.66401e-13	6.56212e-14	1.29403e-12	6.76104e-14
		29.11	1.7907e-12	1.17895e-13	9.64079e-13	6.44726e-14	1.29103e-12	6.67715e-14
		29.13	1.7936e-12	1.18753e-13	9.64969e-13	6.85143e-14	1.28935e-12	6.53371e-14
		29.15	1.79209e-12	1.17443e-13	9.6678e-13	6.79196e-14	1.28911e-12	6.778e-14
		29.17	1.79394e-12	1.18144e-13	9.5958e-13	6.45658e-14	1.28929e-12	6.82935e-14
		29.19	1.79388e-12	1.20407e-13	9.62283e-13	6.3697e-14	1.28819e-12	6.89106e-14
		29.21	1.79237e-12	1.18565e-13	9.63191e-13	6.78533e-14	1.2864e-12	6.88278e-14
		29.23	1.79553e-12	1.17029e-13	9.58605e-13	6.36294e-14	1.28821e-12	6.7718e-14
		29.25	1.79201e-12	1.18829e-13	9.64117e-13	6.336e-14	1.28234e-12	6.7296e-14
		29.27	1.79058e-12	1.1965e-13	9.6532e-13	6.31707e-14	1.28573e-12	6.83437e-14
		29.29	1.79031e-12	1.18941e-13	9.56765e-13	6.53648e-14	1.27817e-12	6.92147e-14
		29.31	1.78415e-12	1.20082e-13	9.60498e-13	6.61586e-14	1.27986e-12	6.61527e-14
		29.33	1.78472e-12	1.19272e-13	9.60578e-13	6.5245e-14	1.27885e-12	6.87895e-14
		29.35	1.78341e-12	1.1764e-13	9.62628e-13	6.78087e-14	1.27462e-12	6.89538e-14
		29.37	1.78555e-12	1.17467e-13	9.60711e-13	6.50326e-14	1.27944e-12	6.90576e-14
		29.39	1.78006e-12	1.15249e-13	9.66758e-13	6.64462e-14	1.27518e-12	7.00856e-14
		29.41	1.78208e-12	1.16834e-13	9.58776e-13	6.52799e-14	1.27564e-12	6.97098e-14
		29.43	1.78082e-12	1.16523e-13	9.55415e-13	6.49368e-14	1.27621e-12	7.04074e-14
		29.45	1.77545e-12	1.15634e-13	9.59581e-13	6.62758e-14	1.26903e-12	7.0678e-14
		29.47	1.77299e-12	1.1687e-13	9.55286e-13	6.74892e-14	1.27221e-12	6.93905e-14
		29.49	1.78172e-12	1.16763e-13	9.60717e-13	6.84528e-14	1.26884e-12	7.04118e-14
		29.51	1.76605e-12	1.16162e-13	9.49666e-13	6.52599e-14	1.27334e-12	6.90106e-14
		29.53	1.77162e-12	1.18083e-13	9.48631e-13	6.53166e-14	1.27208e-12	6.85331e-14
		29.55	1.77113e-12	1.16909e-13	9.50582e-13	6.67474e-14	1.27271e-12	7.1784e-14
		29.57	1.76793e-12	1.15401e-13	9.54944e-13	6.9106e-14	1.2719e-12	7.03083e-14
		29.59	1.76692e-12	1.15907e-13	9.47221e-13	6.24177e-14	1.26953e-12	7.11357e-14
		29.61	1.75517e-12	1.16856e-13	9.48015e-13	6.56943e-14	1.26611e-12	7.17057e-14
		29.63	1.7636e-12	1.16448e-13	9.46266e-13	6.28896e-14	1.25893e-12	6.99339e-14
		29.65	1.75458e-12	1.16555e-13	9.49926e-13	6.67469e-14	1.26229e-12	7.0021e-14
		29.67	1.75564e-12	1.17689e-13	9.55029e-13	6.99427e-14	1.26194e-12	7.1593e-14
		29.69	1.75771e-12	1.16299e-13	9.43882e-13	6.5533e-14	1.26168e-12	7.33717e-14
		29.71	1.75498e-12	1.17094e-13	9.40194e-13	6.59875e-14	1.2603e-12	7.11656e-14
		29.73	1.74337e-12	1.16196e-13	9.48878e-13	6.68228e-14	1.25813e-12	7.37135e-14
		29.75	1.74311e-12	1.1735e-13	9.44064e-13	6.41859e-14	1.25563e-12	7.20942e-14
		29.77	1.74326e-12	1.16241e-13	9.43192e-13	6.59755e-14	1.25791e-12	7.1811e-14
		29.79	1.74864e-12	1.14947e-13	9.41843e-13	6.57579e-14	1.25398e-12	7.26664e-14
		29.81	1.7444e-12	1.14622e-13	9.36357e-13	6.16153e-14	1.25998e-12	7.30751e-14
		29.83	1.7386e-12	1.15321e-13	9.45586e-13	6.51423e-14	1.25953e-12	7.37363e-14
		29.85	1.74444e-12	1.14735e-13	9.51609e-13	6.84755e-14	1.25262e-12	7.27048e-14
		29.87	1.7396e-12	1.15864e-13	9.46263e-13	6.49883e-14	1.25447e-12	7.81948e-14
		29.89	1.73891e-12	1.14161e-13	9.43919e-13	6.84546e-14	1.25325e-12	7.58705e-14
		29.91	1.73922e-12	1.1481e-13	9.44617e-13	6.60125e-14	1.25412e-12	7.42411e-14
		29.93	1.73347e-12	1.17074e-13	9.42051e-13	6.6e-14	1.25436e-12	7.18555e-14
		29.95	1.73208e-12	1.16545e-13	9.29163e-13	6.19169e-14	1.24985e-12	7.1845e-14
		29.97	1.73067e-12	1.16089e-13	9.36686e-13	6.23706e-14	1.2489e-12	7.72066e-14
		29.99	1.7293e-12	1.14441e-13	9.35841e-13	6.35905e-14	1.24614e-12	7.29738e-14
		30.01	1.72917e-12	1.15823e-13	9.33378e-13	6.31893e-14	1.24151e-12	7.24052e-14
		30.03	1.72934e-12	1.15726e-13	9.34055e-13	6.50468e-14	1.24323e-12	7.30654e-14
		30.05	1.72449e-12	1.1494e-13	9.39007e-13	6.65252e-14	1.24004e-12	7.24589e-14
		30.07	1.72567e-12	1.15024e-13	9.40674e-13	6.51926e-14	1.24051e-12	7.14714e-14
		30.09	1.73147e-12	1.17436e-13	9.36053e-13	6.49632e-14	1.23934e-12	7.04846e-14
		30.11	1.73216e-12	1.14247e-13	9.39055e-13	6.74105e-14	1.24171e-12	7.32052e-14
		30.13	1.72672e-12	1.13992e-13	9.37765e-13	6.81353e-14	1.23737e-12	6.97476e-14
		30.15	1.72815e-12	1.18062e-13	9.30595e-13	6.58886e-14	1.24131e-12	7.13461e-14
		30.17	1.72406e-12	1.15669e-13	9.29807e-13	6.79869e-14	1.24133e-12	7.36133e-14
		30.19	1.71733e-12	1.14906e-13	9.36016e-13	6.55096e-14	1.23504e-12	7.12842e-14
		30.21	1.71556e-12	1.13527e-13	9.34662e-13	6.51232e-14	1.23664e-12	7.2679e-14
		30.23	1.71777e-12	1.12876e-13	9.28008e-13	6.31638e-14	1.23365e-12	7.01618e-14
		30.25	1.715e-12	1.16153e-13	9.28041e-13	6.78157e-14	1.23411e-12	7.13517e-14
		30.27	1.71062e-12	1.12382e-13	9.28635e-13	6.42755e-14	1.22738e-12	7.29798e-14
		30.29	1.70904e-12	1.14757e-13	9.26547e-13	6.26522e-14	1.23469e-12	7.32771e-14
		30.31	1.70879e-12	1.1427e-13	9.32743e-13	6.83723e-14	1.22579e-12	7.13111e-14
		30.33	1.70851e-12	1.13756e-13	9.23679e-13	6.23273e-14	1.23078e-12	6.9153e-14
		30.35	1.7083e-12	1.1516e-13	9.31972e-13	6.94329e-14	1.22502e-12	7.11375e-14
		30.37	1.70711e-12	1.13816e-13	9.21742e-13	6.44777e-14	1.22268e-12	7.12347e-14
		30.39	1.70365e-12	1.13899e-13	9.31414e-13	6.80706e-14	1.22533e-12	6.65956e-14
		30.41	1.69504e-12	1.14239e-13	9.25353e-13	6.57321e-14	1.21939e-12	6.98853e-14
		30.43	1.69641e-12	1.14439e-13	9.27124e-13	6.74791e-14	1.22147e-12	7.08833e-14
		30.45	1.69682e-12	1.15529e-13	9.22467e-13	6.29581e-14	1.22015e-12	6.9812e-14
		30.47	1.69666e-12	1.15251e-13	9.27429e-13	6.90152e-14	1.21743e-12	7.16916e-14
		30.49	1.69704e-12	1.15614e-13	9.22237e-13	6.52294e-14	1.21519e-12	6.8275e-14
		30.51	1.69382e-12	1.135e-13	9.26048e-13	6.90982e-14	1.21642e-12	6.98082e-14
		30.53	1.68905e-12	1.15237e-13	9.22308e-13	6.73937e-14	1.21552e-12	7.21546e-14
		30.55	1.6912e-12	1.13706e-13	9.20308e-13	6.69322e-14	1.2172e-12	7.01409e-14
		30.57	1.68749e-12	1.14211e-13	9.20243e-13	6.86506e-14	1.21549e-12	7.23172e-14
		30.59	1.68786e-12	1.14643e-13	9.27261e-13	6.75481e-14	1.20912e-12	7.10415e-14
		30.61	1.68999e-12	1.14709e-13	9.25421e-13	6.53814e-14	1.21132e-12	7.00158e-14
		30.63	1.67836e-12	1.13407e-13	9.25339e-13	6.95147e-14	1.20759e-12	7.10099e-14
		30.65	1.68702e-12	1.15568e-13	9.25293e-13	6.70656e-14	1.20851e-12	7.21781e-14
		30.67	1.68927e-12	1.13696e-13	9.28028e-13	6.70146e-14	1.2124e-12	7.35106e-14
		30.69	1.68637e-12	1.15696e-13	9.18248e-13	6.55572e-14	1.2013e-12	6.94482e-14
		30.71	1.68372e-12	1.11762e-13	9.15533e-13	6.44049e-14	1.20438e-12	7.05759e-14
		30.73	1.68017e-12	1.13316e-13	9.18701e-13	6.59715e-14	1.20419e-12	7.17918e-14
		30.75	1.68009e-12	1.13824e-13	9.20075e-13	6.54881e-14	1.19939e-12	7.08504e-14
		30.77	1.67793e-12	1.1268e-13	9.29598e-13	7.0989e-14	1.19847e-12	6.95941e-14
		30.79	1.67154e-12	1.1327e-13	9.16624e-13	6.53633e-14	1.20137e-12	7.4122e-14
		30.81	1.67471e-12	1.16092e-13	9.20026e-13	6.91504e-14	1.20005e-12	7.25088e-14
		30.83	1.67225e-12	1.13155e-13	9.16164e-13	7.10541e-14	1.20085e-12	7.23007e-14
		30.85	1.66941e-12	1.1216e-13	9.22975e-13	6.98339e-14	1.19801e-12	7.23617e-14
		30.87	1.66508e-12	1.13167e-13	9.13413e-13	6.53544e-14	1.19904e-12	7.31709e-14
		30.89	1.66492e-12	1.11684e-13	9.12048e-13	6.56983e-14	1.19759e-12	7.28253e-14
		30.91	1.67542e-12	1.10409e-13	9.21294e-13	6.86915e-14	1.19501e-12	7.46948e-14
		30.93	1.66846e-12	1.13014e-13	9.13785e-13	6.64219e-14	1.19566e-12	6.98196e-14
		30.95	1.67079e-12	1.11912e-13	9.16208e-13	6.92566e-14	1.19157e-12	7.32688e-14
		30.97	1.66787e-12	1.1171e-13	9.09582e-13	6.52661e-14	1.19212e-12	7.26754e-14
		30.99	1.66739e-12	1.1268e-13	9.14981e-13	7.02071e-14	1.1909e-12	7.35371e-14
		31.01	1.66056e-12	1.12827e-13	9.14107e-13	6.79743e-14	1.19069e-12	7.16331e-14
		31.03	1.66465e-12	1.13357e-13	9.09077e-13	6.6216e-14	1.19061e-12	7.34476e-14
		31.05	1.66214e-12	1.10783e-13	9.09147e-13	6.60601e-14	1.18826e-12	7.4971e-14
		31.07	1.65794e-12	1.1685e-13	9.05818e-13	6.21094e-14	1.19216e-12	7.22627e-14
		31.09	1.65849e-12	1.15041e-13	9.09883e-13	6.7774e-14	1.19063e-12	7.35154e-14
		31.11	1.65314e-12	1.16217e-13	9.15781e-13	7.26669e-14	1.18799e-12	7.28629e-14
		31.13	1.65256e-12	1.13581e-13	9.09512e-13	6.70224e-14	1.18859e-12	7.15291e-14
		31.15	1.65752e-12	1.12255e-13	9.07478e-13	7.02886e-14	1.18324e-12	7.2883e-14
		31.17	1.65788e-12	1.12564e-13	9.06411e-13	6.60832e-14	1.18967e-12	7.18711e-14
		31.19	1.64683e-12	1.13e-13	9.06412e-13	6.68703e-14	1.18134e-12	7.20888e-14
		31.21	1.6507e-12	1.11117e-13	9.0761e-13	6.93164e-14	1.18422e-12	7.19253e-14
		31.23	1.64758e-12	1.09424e-13	9.05942e-13	6.73138e-14	1.18636e-12	7.13498e-14
		31.25	1.65162e-12	1.12084e-13	9.04663e-13	6.94349e-14	1.18089e-12	7.26645e-14
		31.27	1.64528e-12	1.12251e-13	9.06816e-13	6.71527e-14	1.18431e-12	7.08738e-14
		31.29	1.64504e-12	1.1305e-13	9.06617e-13	6.88049e-14	1.17909e-12	7.25268e-14
		31.31	1.64248e-12	1.11211e-13	9.05524e-13	6.72139e-14	1.18314e-12	7.34584e-14
		31.33	1.63949e-12	1.12896e-13	9.06111e-13	6.7391e-14	1.1775e-12	7.33393e-14
		31.35	1.64297e-12	1.11333e-13	9.02638e-13	6.68176e-14	1.17869e-12	7.34427e-14
		31.37	1.63759e-12	1.11671e-13	9.0068e-13	6.96341e-14	1.16999e-12	7.18007e-14
		31.39	1.63869e-12	1.10042e-13	9.02168e-13	6.84246e-14	1.17369e-12	7.1883e-14
		31.41	1.63625e-12	1.1024e-13	8.97402e-13	6.80836e-14	1.16895e-12	7.17259e-14
		31.43	1.63626e-12	1.10921e-13	9.01164e-13	6.91813e-14	1.1703e-12	7.27776e-14
		31.45	1.63154e-12	1.11496e-13	8.96961e-13	6.93182e-14	1.16991e-12	7.45493e-14
		31.47	1.63005e-12	1.3969e-13	8.97994e-13	6.92157e-14	1.17094e-12	7.33808e-14
		31.49	1.62656e-12	1.34935e-13	8.98725e-13	6.81757e-14	1.1699e-12	7.20458e-14
		31.51	1.6246e-12	1.35102e-13	8.93583e-13	6.67601e-14	1.16382e-12	7.2212e-14
		31.53	1.62829e-12	1.34528e-13	8.9703e-13	6.76069e-14	1.16597e-12	7.25515e-14
		31.55	1.62423e-12	1.35521e-13	8.9923e-13	6.72624e-14	1.16487e-12	7.22636e-14
		31.57	1.62632e-12	1.3448e-13	8.9143e-13	7.00656e-14	1.16478e-12	7.53609e-14
		31.59	1.61734e-12	1.36639e-13	8.89118e-13	6.80379e-14	1.16397e-12	7.7129e-14
		31.61	1.616e-12	1.36779e-13	8.89602e-13	6.70412e-14	1.16159e-12	7.40712e-14
		31.63	1.61318e-12	1.36575e-13	8.87663e-13	6.91489e-14	1.16572e-12	7.32394e-14
		31.65	1.61077e-12	1.36646e-13	8.89017e-13	6.88139e-14	1.1629e-12	7.36843e-14
		31.67	1.60982e-12	1.36348e-13	8.91012e-13	7.01042e-14	1.16471e-12	7.24892e-14
		31.69	1.61425e-12	1.33813e-13	8.92384e-13	6.91341e-14	1.16062e-12	7.27969e-14
		31.71	1.60648e-12	1.36138e-13	8.91394e-13	6.82693e-14	1.16642e-12	7.07965e-14
		31.73	1.60588e-12	1.3605e-13	8.89396e-13	6.71515e-14	1.15987e-12	7.17066e-14
		31.75	1.60782e-12	1.34045e-13	8.89939e-13	7.10498e-14	1.16233e-12	7.18949e-14
		31.77	1.60087e-12	1.34996e-13	8.88638e-13	7.0457e-14	1.15513e-12	7.27966e-14
		31.79	1.60685e-12	1.34215e-13	8.88591e-13	7.10164e-14	1.16e-12	7.05337e-14
		31.81	1.61094e-12	1.30801e-13	8.86958e-13	6.96056e-14	1.16003e-12	6.96489e-14
		31.83	1.60602e-12	1.31477e-13	8.82952e-13	7.01925e-14	1.15379e-12	7.06586e-14
		31.85	1.60042e-12	1.30689e-13	8.82946e-13	6.871e-14	1.15866e-12	7.23635e-14
		31.87	1.60396e-12	1.33435e-13	8.83615e-13	6.75076e-14	1.15894e-12	7.16621e-14
		31.89	1.60003e-12	1.33082e-13	8.84109e-13	7.04376e-14	1.15342e-12	7.31757e-14
		31.91	1.59624e-12	1.34531e-13	8.8573e-13	6.90865e-14	1.15336e-12	7.07647e-14
		31.93	1.59132e-12	1.36016e-13	8.827e-13	7.07124e-14	1.15227e-12	7.24445e-14
		31.95	1.59085e-12	1.36188e-13	8.862e-13	7.11768e-14	1.1495e-12	7.27176e-14
		31.97	1.59747e-12	1.31643e-13	8.79809e-13	6.69396e-14	1.15124e-12	7.30809e-14
		31.99	1.58918e-12	1.32958e-13	8.79615e-13	7.14204e-14	1.15629e-12	7.32163e-14
		32.01	1.59183e-12	1.33774e-13	8.77687e-13	6.86911e-14	1.14892e-12	7.31041e-14
		32.03	1.58839e-12	1.35784e-13	8.77918e-13	6.90709e-14	1.15221e-12	7.19679e-14
		32.05	1.58894e-12	1.36026e-13	8.78763e-13	6.852e-14	1.1435e-12	7.39437e-14
		32.07	1.58726e-12	1.3378e-13	8.79996e-13	6.75802e-14	1.15261e-12	7.39234e-14
		32.09	1.59305e-12	1.33599e-13	8.78502e-13	7.00076e-14	1.14974e-12	7.19595e-14
		32.11	1.58755e-12	1.3507e-13	8.76861e-13	6.85076e-14	1.14459e-12	7.2783e-14
		32.13	1.59182e-12	1.32285e-13	8.7875e-13	7.19323e-14	1.14791e-12	7.16619e-14
		32.15	1.58512e-12	1.32474e-13	8.73294e-13	6.52636e-14	1.15034e-12	7.60743e-14
		32.17	1.5773e-12	1.33527e-13	8.74764e-13	7.04996e-14	1.14651e-12	7.40443e-14
		32.19	1.58026e-12	1.32938e-13	8.72932e-13	6.91105e-14	1.14854e-12	7.35282e-14
		32.21	1.57366e-12	1.34683e-13	8.77632e-13	7.01862e-14	1.14242e-12	7.11766e-14
		32.23	1.57687e-12	1.34479e-13	8.77536e-13	7.24235e-14	1.13944e-12	7.34776e-14
		32.25	1.58171e-12	1.33451e-13	8.73254e-13	6.83711e-14	1.13717e-12	7.42424e-14
		32.27	1.57745e-12	1.32421e-13	8.67186e-13	6.56266e-14	1.13398e-12	7.40838e-14
		32.29	1.57634e-12	1.30276e-13	8.70585e-13	6.66105e-14	1.14038e-12	7.12323e-14
		32.31	1.57327e-12	1.34155e-13	8.76588e-13	7.01161e-14	1.1361e-12	7.28581e-14
		32.33	1.57166e-12	1.32808e-13	8.72101e-13	6.98631e-14	1.13571e-12	7.2006e-14
		32.35	1.57415e-12	1.32078e-13	8.71764e-13	6.71609e-14	1.1379e-12	7.34234e-14
		32.37	1.56739e-12	1.31433e-13	8.72297e-13	6.86228e-14	1.12917e-12	7.30772e-14
		32.39	1.56861e-12	1.31059e-13	8.68539e-13	6.97209e-14	1.13787e-12	7.36456e-14
		32.41	1.56651e-12	1.2968e-13	8.73343e-13	7.55373e-14	1.1371e-12	7.34718e-14
		32.43	1.56348e-12	1.29622e-13	8.70531e-13	7.07495e-14	1.13674e-12	7.56511e-14
		32.45	1.56456e-12	1.28914e-13	8.70564e-13	7.0319e-14	1.12856e-12	7.32077e-14
		32.47	1.56273e-12	1.30111e-13	8.67361e-13	7.15526e-14	1.13218e-12	7.25328e-14
		32.49	1.56141e-12	1.31913e-13	8.71276e-13	7.29066e-14	1.12882e-12	7.48053e-14
		32.51	1.56669e-12	1.30226e-13	8.62812e-13	7.04022e-14	1.12835e-12	7.32743e-14
		32.53	1.55865e-12	1.2834e-13	8.65014e-13	7.14713e-14	1.13361e-12	7.31841e-14
		32.55	1.56547e-12	1.30901e-13	8.61004e-13	6.95191e-14	1.13127e-12	7.47678e-14
		32.57	1.5536e-12	1.31246e-13	8.72258e-13	7.02966e-14	1.12167e-12	7.46478e-14
		32.59	1.55651e-12	1.29949e-13	8.74354e-13	7.07925e-14	1.12639e-12	7.37267e-14
		32.61	1.55162e-12	1.29229e-13	8.68429e-13	6.94906e-14	1.12479e-12	7.3867e-14
		32.63	1.54926e-12	1.31514e-13	8.71077e-13	7.33076e-14	1.12524e-12	7.66349e-14
		32.65	1.551e-12	1.31441e-13	8.67025e-13	6.91396e-14	1.1245e-12	7.6303e-14
		32.67	1.552e-12	1.29725e-13	8.64316e-13	6.41148e-14	1.12166e-12	7.44685e-14
		32.69	1.55629e-12	1.29744e-13	8.74285e-13	6.70289e-14	1.11992e-12	7.21826e-14
		32.71	1.5458e-12	1.32091e-13	8.64028e-13	7.1093e-14	1.11722e-12	7.2519e-14
		32.73	1.5439e-12	1.34004e-13	8.6014e-13	7.1045e-14	1.11925e-12	7.51542e-14
		32.75	1.54869e-12	1.30718e-13	8.61687e-13	7.32444e-14	1.11685e-12	7.79061e-14
		32.77	1.54858e-12	1.30578e-13	8.59051e-13	6.92431e-14	1.12093e-12	7.53835e-14
		32.79	1.55118e-12	1.27185e-13	8.6007e-13	7.10838e-14	1.11579e-12	7.42953e-14
		32.81	1.55066e-12	1.27942e-13	8.60879e-13	6.99473e-14	1.11692e-12	7.48578e-14
		32.83	1.5478e-12	1.28484e-13	8.5879e-13	7.42648e-14	1.11991e-12	7.60608e-14
		32.85	1.54379e-12	1.3173e-13	8.57518e-13	7.21234e-14	1.11439e-12	7.28734e-14
		32.87	1.54234e-12	1.31405e-13	8.57143e-13	7.0172e-14	1.11679e-12	7.65623e-14
		32.89	1.53754e-12	1.32468e-13	8.59229e-13	7.16942e-14	1.11199e-12	7.43573e-14
		32.91	1.54638e-12	1.30803e-13	8.57747e-13	7.2553e-14	1.11572e-12	7.65205e-14
		32.93	1.53273e-12	1.32215e-13	8.62029e-13	7.39143e-14	1.11165e-12	7.43052e-14
		32.95	1.5322e-12	1.31424e-13	8.5521e-13	7.19011e-14	1.1081e-12	7.55585e-14
		32.97	1.53513e-12	1.30723e-13	8.58078e-13	7.11736e-14	1.11319e-12	7.47657e-14
		32.99	1.53374e-12	1.3538e-13	8.58167e-13	7.4305e-14	1.11139e-12	7.42911e-14
		33.01	1.53134e-12	1.33798e-13	8.52175e-13	6.77774e-14	1.11119e-12	7.2311e-14
		33.03	1.52844e-12	1.30702e-13	8.59374e-13	7.51811e-14	1.11243e-12	7.43092e-14
		33.05	1.52768e-12	1.30863e-13	8.59937e-13	7.3284e-14	1.11545e-12	7.65641e-14
		33.07	1.52591e-12	1.29369e-13	8.53131e-13	6.93742e-14	1.10571e-12	7.66102e-14
		33.09	1.52502e-12	1.33759e-13	8.54755e-13	7.24054e-14	1.10596e-12	7.46478e-14
		33.11	1.53141e-12	1.31093e-13	8.56972e-13	7.02852e-14	1.10655e-12	7.31761e-14
		33.13	1.52971e-12	1.27533e-13	8.54763e-13	7.52956e-14	1.10608e-12	7.65525e-14
		33.15	1.52169e-12	1.29269e-13	8.52384e-13	7.12132e-14	1.10726e-12	7.38208e-14
		33.17	1.52284e-12	1.30347e-13	8.52227e-13	7.12767e-14	1.10417e-12	7.46353e-14
		33.19	1.53095e-12	1.29437e-13	8.55657e-13	7.25122e-14	1.10243e-12	7.35981e-14
		33.21	1.52218e-12	1.2826e-13	8.50251e-13	6.95951e-14	1.11202e-12	8.15074e-14
		33.23	1.51544e-12	1.28751e-13	8.53279e-13	6.97555e-14	1.10103e-12	7.39078e-14
		33.25	1.51197e-12	1.30771e-13	8.52379e-13	7.55688e-14	1.10214e-12	7.49059e-14
		33.27	1.51054e-12	1.28785e-13	8.54486e-13	7.54938e-14	1.09752e-12	7.7873e-14
		33.29	1.51101e-12	1.30912e-13	8.50003e-13	7.18452e-14	1.09711e-12	7.4788e-14
		33.31	1.51285e-12	1.26447e-13	8.50527e-13	7.00411e-14	1.09837e-12	7.61899e-14
		33.33	1.5123e-12	1.28408e-13	8.48637e-13	6.9074e-14	1.09927e-12	7.52637e-14
		33.35	1.50599e-12	1.27506e-13	8.53998e-13	7.40877e-14	1.09975e-12	7.60562e-14
		33.37	1.50781e-12	1.31692e-13	8.48168e-13	7.14734e-14	1.09638e-12	7.57819e-14
		33.39	1.51023e-12	1.28996e-13	8.51085e-13	7.10057e-14	1.09417e-12	7.34188e-14
		33.41	1.50549e-12	1.28684e-13	8.40145e-13	6.67576e-14	1.09602e-12	7.6832e-14
		33.43	1.50772e-12	1.31529e-13	8.3919e-13	6.39082e-14	1.09254e-12	7.37881e-14
		33.45	1.50992e-12	1.28896e-13	8.39103e-13	6.50882e-14	1.09164e-12	7.6403e-14
		33.47	1.50002e-12	1.29343e-13	8.35074e-13	6.26198e-14	1.08649e-12	7.53702e-14
		33.49	1.49867e-12	1.31396e-13	8.37283e-13	6.56731e-14	1.09261e-12	7.27053e-14
		33.51	1.49579e-12	1.32645e-13	8.40353e-13	6.56075e-14	1.09264e-12	7.66233e-14
		33.53	1.49951e-12	1.32988e-13	8.35551e-13	6.29379e-14	1.08836e-12	7.40088e-14
		33.55	1.50155e-12	1.28158e-13	8.31884e-13	6.45753e-14	1.08537e-12	7.66185e-14
		33.57	1.49372e-12	1.29915e-13	8.36108e-13	6.70515e-14	1.0915e-12	7.54006e-14
		33.59	1.49642e-12	1.28334e-13	8.31706e-13	6.25488e-14	1.08496e-12	7.56937e-14
		33.61	1.488e-12	1.34208e-13	8.3502e-13	6.63927e-14	1.08782e-12	7.60749e-14
		33.63	1.48528e-12	1.32787e-13	8.39032e-13	6.59334e-14	1.08873e-12	7.56597e-14
		33.65	1.47847e-12	1.32313e-13	8.33818e-13	6.44672e-14	1.08867e-12	7.51324e-14
		33.67	1.47517e-12	1.34971e-13	8.353e-13	6.50233e-14	1.0911e-12	7.48196e-14
		33.69	1.47523e-12	1.37985e-13	8.37008e-13	6.21857e-14	1.08436e-12	7.36606e-14
		33.71	1.47901e-12	1.36378e-13	8.32187e-13	6.51699e-14	1.08565e-12	7.37257e-14
		33.73	1.48199e-12	1.33541e-13	8.26689e-13	6.17819e-14	1.08181e-12	7.48016e-14
		33.75	1.47686e-12	1.38041e-13	8.2823e-13	6.24308e-14	1.07944e-12	7.44131e-14
		33.77	1.47251e-12	1.34451e-13	8.32062e-13	6.84682e-14	1.08201e-12	7.36049e-14
		33.79	1.46691e-12	1.35943e-13	8.30888e-13	6.48745e-14	1.0776e-12	7.47154e-14
		33.81	1.46887e-12	1.35777e-13	8.25417e-13	6.26515e-14	1.07824e-12	7.40631e-14
		33.83	1.47432e-12	1.36993e-13	8.29459e-13	6.25727e-14	1.07613e-12	7.49931e-14
		33.85	1.47328e-12	1.34529e-13	8.30484e-13	6.86459e-14	1.08036e-12	7.5043e-14
		33.87	1.46927e-12	1.35349e-13	8.30626e-13	6.5778e-14	1.07745e-12	7.30726e-14
		33.89	1.46971e-12	1.34234e-13	8.24569e-13	6.4798e-14	1.07943e-12	7.50781e-14
		33.91	1.4634e-12	1.38314e-13	8.23789e-13	6.29044e-14	1.08033e-12	7.35644e-14
		33.93	1.46766e-12	1.36537e-13	8.23791e-13	6.41378e-14	1.07151e-12	7.44128e-14
		33.95	1.46179e-12	1.37585e-13	8.27707e-13	6.72583e-14	1.0714e-12	7.49455e-14
		33.97	1.46412e-12	1.37665e-13	8.20243e-13	6.19527e-14	1.07009e-12	7.53083e-14
		33.99	1.46669e-12	1.37906e-13	8.26958e-13	6.66696e-14	1.07523e-12	7.41052e-14
		34.01	1.454e-12	1.38052e-13	8.2422e-13	6.5168e-14	1.06893e-12	7.21401e-14
		34.03	1.4623e-12	1.38642e-13	8.22863e-13	6.18007e-14	1.07277e-12	7.43187e-14
		34.05	1.45625e-12	1.35924e-13	8.27943e-13	6.5148e-14	1.06771e-12	7.32897e-14
		34.07	1.45403e-12	1.36753e-13	8.23414e-13	6.53136e-14	1.07013e-12	7.54128e-14
		34.09	1.45629e-12	1.37222e-13	8.24617e-13	6.70072e-14	1.06673e-12	7.72949e-14
		34.11	1.45366e-12	1.35146e-13	8.24394e-13	6.33476e-14	1.06934e-12	7.68895e-14
		34.13	1.45845e-12	1.32495e-13	8.21564e-13	6.53466e-14	1.06791e-12	7.4192e-14
		34.15	1.44998e-12	1.34949e-13	8.13048e-13	6.33952e-14	1.06689e-12	7.3937e-14
		34.17	1.45226e-12	1.33601e-13	8.18056e-13	6.67017e-14	1.07222e-12	7.47078e-14
		34.19	1.45229e-12	1.37481e-13	8.19367e-13	6.59076e-14	1.075e-12	7.72688e-14
		34.21	1.44809e-12	1.36258e-13	8.181e-13	6.43819e-14	1.06894e-12	7.59588e-14
		34.23	1.44584e-12	1.35767e-13	8.23321e-13	6.51863e-14	1.06887e-12	7.51341e-14
		34.25	1.44527e-12	1.34535e-13	8.24923e-13	6.6828e-14	1.07104e-12	7.38717e-14
		34.27	1.45226e-12	1.32355e-13	8.16967e-13	6.49954e-14	1.06918e-12	7.61752e-14
		34.29	1.44225e-12	1.34168e-13	8.19953e-13	6.4251e-14	1.07039e-12	7.38997e-14
		34.31	1.44436e-12	1.33617e-13	8.21409e-13	6.73958e-14	1.0647e-12	7.36856e-14
		34.33	1.43778e-12	1.33852e-13	8.19874e-13	6.13641e-14	1.06092e-12	7.53275e-14
		34.35	1.44062e-12	1.33e-13	8.19889e-13	6.06339e-14	1.06597e-12	7.56664e-14
		34.37	1.43929e-12	1.33634e-13	8.20851e-13	6.03815e-14	1.06677e-12	7.46622e-14
		34.39	1.44113e-12	1.33112e-13	8.21817e-13	6.22196e-14	1.06075e-12	7.52762e-14
		34.41	1.43541e-12	1.35614e-13	8.20542e-13	6.21035e-14	1.06707e-12	7.35967e-14
		34.43	1.4329e-12	1.33832e-13	8.22388e-13	6.59178e-14	1.06571e-12	7.29273e-14
		34.45	1.42926e-12	1.34224e-13	8.21666e-13	6.48673e-14	1.06665e-12	7.4931e-14
		34.47	1.43217e-12	1.33083e-13	8.19488e-13	6.30856e-14	1.0676e-12	7.30885e-14
		34.49	1.43073e-12	1.35088e-13	8.26946e-13	6.93409e-14	1.06735e-12	7.47597e-14
		34.51	1.4277e-12	1.34931e-13	8.13242e-13	6.34886e-14	1.06097e-12	7.45585e-14
		34.53	1.43382e-12	1.31305e-13	8.19656e-13	6.09133e-14	1.06364e-12	7.49742e-14
		34.55	1.42711e-12	1.36119e-13	8.2382e-13	6.40368e-14	1.06842e-12	7.46632e-14
		34.57	1.42262e-12	1.33881e-13	8.15859e-13	5.83353e-14	1.05849e-12	7.55646e-14
		34.59	1.41821e-12	1.35324e-13	8.2462e-13	6.50314e-14	1.05536e-12	7.42818e-14
		34.61	1.41807e-12	1.35064e-13	8.16052e-13	6.27653e-14	1.06302e-12	7.44914e-14
		34.63	1.42189e-12	1.37206e-13	8.12033e-13	5.80211e-14	1.06628e-12	7.45029e-14
		34.65	1.41393e-12	1.36388e-13	8.20002e-13	6.11656e-14	1.05352e-12	7.73124e-14
		34.67	1.41607e-12	1.36494e-13	8.14371e-13	6.02673e-14	1.05922e-12	7.43229e-14
		34.69	1.41607e-12	1.39349e-13	8.1774e-13	6.12609e-14	1.05663e-12	7.55054e-14
		34.71	1.40974e-12	1.3876e-13	8.1241e-13	6.09945e-14	1.05609e-12	7.62362e-14
		34.73	1.41955e-12	1.36606e-13	8.15521e-13	6.30031e-14	1.05374e-12	7.42456e-14
		34.75	1.41518e-12	1.34178e-13	8.15381e-13	6.40486e-14	1.05072e-12	7.56434e-14
		34.77	1.41329e-12	1.37348e-13	8.13563e-13	6.09583e-14	1.05285e-12	7.57231e-14
		34.79	1.40997e-12	1.35138e-13	8.14845e-13	5.86626e-14	1.05586e-12	7.54268e-14
		34.81	1.40783e-12	1.34811e-13	8.26237e-13	6.47251e-14	1.05401e-12	7.76485e-14
		34.83	1.41023e-12	1.35892e-13	8.12571e-13	6.15929e-14	1.05681e-12	7.48128e-14
		34.85	1.41094e-12	1.35159e-13	8.0668e-13	5.90923e-14	1.05239e-12	7.78632e-14
		34.87	1.40652e-12	1.34597e-13	8.09284e-13	6.26949e-14	1.0521e-12	7.56582e-14
		34.89	1.4113e-12	1.3213e-13	8.11176e-13	6.23646e-14	1.04876e-12	7.5049e-14
		34.91	1.40465e-12	1.36598e-13	8.10477e-13	6.15558e-14	1.05295e-12	7.49364e-14
		34.93	1.40347e-12	1.34999e-13	8.09389e-13	5.99846e-14	1.04754e-12	7.67767e-14
		34.95	1.40685e-12	1.3775e-13	8.07282e-13	6.1094e-14	1.04473e-12	7.4615e-14
		34.97	1.40313e-12	1.34974e-13	8.03325e-13	6.16817e-14	1.04334e-12	7.54838e-14
		34.99	1.40792e-12	1.35018e-13	8.1115e-13	6.0448e-14	1.04611e-12	7.49455e-14
		35.01	1.40015e-12	1.34543e-13	7.98302e-13	5.74668e-14	1.04269e-12	7.40634e-14
		35.03	1.40511e-12	1.35706e-13	8.06113e-13	6.06836e-14	1.04506e-12	7.54372e-14
		35.05	1.3983e-12	1.36503e-13	8.01614e-13	5.93279e-14	1.04597e-12	7.64374e-14
		35.07	1.39863e-12	1.35051e-13	8.0145e-13	5.98811e-14	1.04119e-12	7.45126e-14
		35.09	1.39809e-12	1.36139e-13	8.026e-13	6.01825e-14	1.03813e-12	7.42302e-14
		35.11	1.39834e-12	1.35276e-13	8.09242e-13	6.02349e-14	1.04092e-12	7.56359e-14
		35.13	1.39666e-12	1.34051e-13	8.0935e-13	6.28478e-14	1.04464e-12	7.52629e-14
		35.15	1.39381e-12	1.34655e-13	8.0322e-13	6.03981e-14	1.03814e-12	7.4579e-14
		35.17	1.39481e-12	1.3574e-13	8.0311e-13	6.19496e-14	1.03954e-12	7.57543e-14
		35.19	1.39442e-12	1.35108e-13	8.0199e-13	6.10862e-14	1.04071e-12	7.3468e-14
		35.21	1.38354e-12	1.3496e-13	8.0415e-13	6.2988e-14	1.04171e-12	7.63098e-14
		35.23	1.3914e-12	1.34412e-13	8.04961e-13	5.97372e-14	1.03996e-12	7.57663e-14
		35.25	1.39002e-12	1.34333e-13	8.00798e-13	6.16646e-14	1.03963e-12	7.39591e-14
		35.27	1.38944e-12	1.34954e-13	8.057e-13	6.33608e-14	1.03569e-12	7.3952e-14
		35.29	1.38816e-12	1.35239e-13	8.00683e-13	6.01686e-14	1.03414e-12	7.54009e-14
		35.31	1.39093e-12	1.32241e-13	8.01806e-13	5.80034e-14	1.03315e-12	7.3907e-14
		35.33	1.38761e-12	1.33686e-13	7.95839e-13	5.85813e-14	1.03513e-12	7.52643e-14
		35.35	1.38497e-12	1.36342e-13	8.03352e-13	6.27803e-14	1.03012e-12	7.31728e-14
		35.37	1.38233e-12	1.35494e-13	8.01209e-13	6.31172e-14	1.02939e-12	7.21167e-14
		35.39	1.38766e-12	1.36692e-13	8.0081e-13	5.99458e-14	1.02531e-12	6.98473e-14
		35.41	1.38548e-12	1.33094e-13	8.0152e-13	6.13021e-14	1.02447e-12	7.04402e-14
		35.43	1.38041e-12	1.34467e-13	8.00816e-13	6.40894e-14	1.02435e-12	7.19493e-14
		35.45	1.38044e-12	1.35543e-13	7.99252e-13	6.10051e-14	1.0216e-12	7.24901e-14
		35.47	1.37553e-12	1.37903e-13	7.96857e-13	5.95348e-14	1.02351e-12	6.99236e-14
		35.49	1.37111e-12	1.36157e-13	7.97103e-13	6.26663e-14	1.02602e-12	7.25014e-14
		35.51	1.37706e-12	1.3592e-13	8.05527e-13	6.2218e-14	1.02542e-12	7.11578e-14
		35.53	1.37426e-12	1.37052e-13	8.03145e-13	6.08785e-14	1.02234e-12	7.32018e-14
		35.55	1.37497e-12	1.35534e-13	8.05327e-13	5.95293e-14	1.01915e-12	7.19541e-14
		35.57	1.37282e-12	1.36706e-13	7.95684e-13	6.11918e-14	1.01837e-12	7.05783e-14
		35.59	1.38031e-12	1.3746e-13	7.99323e-13	6.33286e-14	1.01722e-12	7.49427e-14
		35.61	1.37191e-12	1.34712e-13	8.01584e-13	6.51611e-14	1.02078e-12	7.25447e-14
		35.63	1.3747e-12	1.36519e-13	7.9489e-13	5.77351e-14	1.02272e-12	7.69003e-14
		35.65	1.36874e-12	1.332e-13	7.93234e-13	6.47262e-14	1.02164e-12	7.45794e-14
		35.67	1.36982e-12	1.35254e-13	8.01507e-13	6.46596e-14	1.01977e-12	7.646e-14
		35.69	1.37198e-12	1.36678e-13	8.02867e-13	6.33126e-14	1.02249e-12	7.19452e-14
		35.71	1.3686e-12	1.34755e-13	7.99329e-13	6.00878e-14	1.01808e-12	7.68694e-14
		35.73	1.36621e-12	1.33153e-13	7.99459e-13	6.03614e-14	1.0196e-12	7.64977e-14
		35.75	1.36534e-12	1.36971e-13	7.96803e-13	6.46245e-14	1.01823e-12	7.53675e-14
		35.77	1.36359e-12	1.35842e-13	8.00819e-13	6.15001e-14	1.02039e-12	7.65861e-14
		35.79	1.35866e-12	1.35006e-13	7.96977e-13	6.22342e-14	1.01529e-12	7.86991e-14
		35.81	1.35773e-12	1.37188e-13	7.92012e-13	5.7083e-14	1.01411e-12	7.82238e-14
		35.83	1.3607e-12	1.36365e-13	7.97046e-13	6.31531e-14	1.01016e-12	7.61695e-14
		35.85	1.36191e-12	1.37133e-13	7.95213e-13	6.14004e-14	1.01518e-12	7.6438e-14
		35.87	1.3586e-12	1.37344e-13	7.92625e-13	6.10032e-14	1.01437e-12	7.68004e-14
		35.89	1.35983e-12	1.37305e-13	7.92964e-13	6.30588e-14	1.0123e-12	7.52228e-14
		35.91	1.36446e-12	1.35946e-13	7.97837e-13	6.18603e-14	1.01264e-12	7.78463e-14
		35.93	1.35749e-12	1.36972e-13	7.91681e-13	5.74466e-14	1.01559e-12	7.63994e-14
		35.95	1.35373e-12	1.35082e-13	7.89346e-13	5.72716e-14	1.01402e-12	7.50198e-14
		35.97	1.35522e-12	1.34693e-13	7.88747e-13	5.79965e-14	1.00821e-12	7.80763e-14
		35.99	1.35356e-12	1.34407e-13	7.93861e-13	6.14217e-14	1.01274e-12	7.58268e-14
		36.01	1.35139e-12	1.34898e-13	7.92983e-13	6.18977e-14	1.00955e-12	7.45184e-14
		36.03	1.35077e-12	1.34145e-13	7.90077e-13	6.51563e-14	1.00928e-12	7.41591e-14
		36.05	1.34279e-12	1.33228e-13	7.86751e-13	6.10785e-14	1.00741e-12	7.64645e-14
		36.07	1.34774e-12	1.36732e-13	7.93226e-13	6.1627e-14	1.00792e-12	7.50712e-14
		36.09	1.34734e-12	1.34609e-13	7.92636e-13	5.86653e-14	1.00779e-12	7.45026e-14
		36.11	1.34488e-12	1.35007e-13	7.91359e-13	6.33907e-14	1.0057e-12	7.31119e-14
		36.13	1.35096e-12	1.31519e-13	7.8861e-13	6.04861e-14	1.0036e-12	7.52492e-14
		36.15	1.34283e-12	1.35268e-13	7.86854e-13	6.2442e-14	1.00334e-12	7.47349e-14
		36.17	1.34713e-12	1.33005e-13	7.85579e-13	6.31685e-14	1.00113e-12	7.51551e-14
		36.19	1.33717e-12	1.34579e-13	7.87511e-13	6.44096e-14	1.00123e-12	7.60825e-14
		36.21	1.34165e-12	1.31896e-13	7.84574e-13	6.5757e-14	1.0016e-12	7.49279e-14
		36.23	1.34227e-12	1.33724e-13	7.81008e-13	5.87486e-14	1.00038e-12	7.38042e-14
		36.25	1.3336e-12	1.32695e-13	7.81285e-13	5.94217e-14	1.00401e-12	7.72569e-14
		36.27	1.34058e-12	1.32561e-13	7.84787e-13	6.58547e-14	9.97764e-13	7.54723e-14
		36.29	1.33173e-12	1.3651e-13	7.84898e-13	6.1111e-14	9.99622e-13	7.42791e-14
		36.31	1.33968e-12	1.30815e-13	7.85109e-13	6.42421e-14	1.00279e-12	7.37436e-14
		36.33	1.34307e-12	1.31657e-13	7.83647e-13	6.18292e-14	9.98976e-13	7.52026e-14
		36.35	1.33715e-12	1.30582e-13	7.84985e-13	6.50547e-14	1.0011e-12	7.80313e-14
		36.37	1.33307e-12	1.33462e-13	7.83906e-13	6.26343e-14	9.94358e-13	7.70452e-14
		36.39	1.32933e-12	1.31877e-13	7.85086e-13	6.56934e-14	9.97879e-13	7.85556e-14
		36.41	1.33385e-12	1.32906e-13	7.85939e-13	6.36462e-14	9.95243e-13	7.74853e-14
		36.43	1.33093e-12	1.31623e-13	7.80712e-13	6.26924e-14	9.96417e-13	7.70655e-14
		36.45	1.33087e-12	1.37531e-13	7.87228e-13	6.25179e-14	9.98939e-13	7.49675e-14
		36.47	1.33265e-12	1.33418e-13	7.83424e-13	6.51524e-14	9.9125e-13	7.50865e-14
		36.49	1.32837e-12	1.33789e-13	7.81614e-13	6.09598e-14	9.91588e-13	7.58008e-14
		36.51	1.32511e-12	1.33474e-13	7.79451e-13	6.06141e-14	9.91647e-13	7.75305e-14
		36.53	1.32685e-12	1.35352e-13	7.8472e-13	6.2304e-14	9.92594e-13	7.60029e-14
		36.55	1.32582e-12	1.3448e-13	7.82427e-13	6.1414e-14	9.86168e-13	7.68907e-14
		36.57	1.32478e-12	1.34851e-13	7.84338e-13	6.14646e-14	9.92588e-13	7.69166e-14
		36.59	1.32362e-12	1.33631e-13	7.82876e-13	6.0645e-14	9.90744e-13	7.79264e-14
		36.61	1.32254e-12	1.3654e-13	7.85007e-13	6.45122e-14	9.83727e-13	7.74983e-14
		36.63	1.32149e-12	1.33395e-13	7.84338e-13	6.39614e-14	9.88488e-13	7.59926e-14
		36.65	1.3255e-12	1.33536e-13	7.80538e-13	6.16786e-14	9.84711e-13	7.78645e-14
		36.67	1.32426e-12	1.34676e-13	7.80476e-13	6.26712e-14	9.89398e-13	7.57171e-14
		36.69	1.32304e-12	1.35183e-13	7.82593e-13	6.59066e-14	9.9031e-13	7.72743e-14
		36.71	1.31862e-12	1.34122e-13	7.78268e-13	6.34372e-14	9.86366e-13	7.5557e-14
		36.73	1.32082e-12	1.35393e-13	7.79577e-13	6.28309e-14	9.87894e-13	7.77223e-14
		36.75	1.31952e-12	1.35103e-13	7.79744e-13	6.01988e-14	9.88984e-13	7.74629e-14
		36.77	1.31585e-12	1.34944e-13	7.80881e-13	6.44916e-14	9.88007e-13	7.84148e-14
		36.79	1.3171e-12	1.34562e-13	7.77439e-13	6.39355e-14	9.87006e-13	7.9135e-14
		36.81	1.31808e-12	1.34578e-13	7.74243e-13	5.94433e-14	9.793e-13	7.63106e-14
		36.83	1.31581e-12	1.37026e-13	7.82149e-13	6.67903e-14	9.80541e-13	7.50379e-14
		36.85	1.30957e-12	1.35498e-13	7.76926e-13	6.19921e-14	9.8084e-13	7.66782e-14
		36.87	1.31468e-12	1.35683e-13	7.86251e-13	7.23756e-14	9.73183e-13	7.64721e-14
		36.89	1.31415e-12	1.36392e-13	7.78932e-13	6.86352e-14	9.78874e-13	7.58477e-14
		36.91	1.31315e-12	1.34208e-13	7.78642e-13	6.56192e-14	9.73459e-13	7.53318e-14
		36.93	1.3103e-12	1.35818e-13	7.84072e-13	6.73021e-14	9.67912e-13	7.76622e-14
		36.95	1.31322e-12	1.33529e-13	7.85894e-13	7.28061e-14	9.67069e-13	7.60814e-14
		36.97	1.30513e-12	1.36105e-13	7.84121e-13	6.97531e-14	9.71087e-13	7.60152e-14
		36.99	1.30764e-12	1.35614e-13	7.80847e-13	6.66617e-14	9.67645e-13	7.60813e-14
		37.01	1.30506e-12	1.34533e-13	7.79675e-13	6.95903e-14	9.66802e-13	7.60226e-14
		37.03	1.30803e-12	1.32338e-13	7.87317e-13	7.22349e-14	9.67235e-13	7.41567e-14
		37.05	1.3028e-12	1.32851e-13	7.84306e-13	7.10936e-14	9.64248e-13	7.73516e-14
		37.07	1.30396e-12	1.34308e-13	7.87185e-13	7.2707e-14	9.63926e-13	7.511e-14
		37.09	1.311e-12	1.34555e-13	7.79208e-13	6.47891e-14	9.65861e-13	7.72503e-14
		37.11	1.30133e-12	1.3535e-13	7.78701e-13	6.76323e-14	9.59358e-13	7.63673e-14
		37.13	1.30596e-12	1.32747e-13	7.77252e-13	6.86065e-14	9.61778e-13	7.5262e-14
		37.15	1.30475e-12	1.35368e-13	7.83946e-13	7.16969e-14	9.53452e-13	7.58092e-14
		37.17	1.30093e-12	1.34018e-13	7.76506e-13	7.06397e-14	9.57412e-13	7.45312e-14
		37.19	1.301e-12	1.34671e-13	7.78794e-13	7.18754e-14	9.54873e-13	7.47412e-14
		37.21	1.29856e-12	1.34194e-13	7.80309e-13	6.85452e-14	9.59298e-13	7.60958e-14
		37.23	1.2939e-12	1.34426e-13	7.83167e-13	7.03786e-14	9.46176e-13	7.54457e-14
		37.25	1.29277e-12	1.32151e-13	7.80959e-13	7.02845e-14	9.56522e-13	7.71139e-14
		37.27	1.29144e-12	1.32495e-13	7.81313e-13	6.87183e-14	9.57049e-13	7.60094e-14
		37.29	1.28945e-12	1.30749e-13	7.81026e-13	7.30962e-14	9.57232e-13	7.44981e-14
		37.31	1.28722e-12	1.30366e-13	7.81152e-13	7.42205e-14	9.55084e-13	7.49849e-14
		37.33	1.28791e-12	1.30488e-13	7.82747e-13	6.99589e-14	9.55381e-13	7.42555e-14
		37.35	1.28862e-12	1.31945e-13	7.8725e-13	7.46862e-14	9.54162e-13	7.41735e-14
		37.37	1.29323e-12	1.30041e-13	7.74537e-13	6.97758e-14	9.50135e-13	7.68721e-14
		37.39	1.27995e-12	1.3184e-13	7.77329e-13	6.8901e-14	9.57626e-13	7.66253e-14
		37.41	1.28551e-12	1.30294e-13	7.74284e-13	6.72439e-14	9.58443e-13	7.68216e-14
		37.43	1.28868e-12	1.31528e-13	7.80746e-13	7.17565e-14	9.52967e-13	7.61803e-14
		37.45	1.28577e-12	1.34562e-13	7.78915e-13	7.1931e-14	9.56692e-13	7.33858e-14
		37.47	1.28259e-12	1.32372e-13	7.73109e-13	7.36988e-14	9.55805e-13	7.6358e-14
		37.49	1.28294e-12	1.32273e-13	7.73166e-13	6.95905e-14	9.54876e-13	7.40471e-14
		37.51	1.28184e-12	1.32272e-13	7.74445e-13	7.14484e-14	9.56969e-13	7.70292e-14
		37.53	1.27905e-12	1.31957e-13	7.78686e-13	7.17589e-14	9.55875e-13	7.65959e-14
		37.55	1.28003e-12	1.33152e-13	7.84577e-13	7.35877e-14	9.51807e-13	7.61985e-14
		37.57	1.28595e-12	1.31717e-13	7.87243e-13	7.40704e-14	9.4986e-13	7.63328e-14
		37.59	1.2767e-12	1.32399e-13	7.94695e-13	8.10036e-14	9.53003e-13	7.55685e-14
		37.61	1.28365e-12	1.30283e-13	7.84823e-13	8.02732e-14	9.50648e-13	7.60531e-14
		37.63	1.2782e-12	1.33313e-13	7.7737e-13	6.98196e-14	9.50528e-13	7.28485e-14
		37.65	1.27431e-12	1.31558e-13	7.72751e-13	6.9164e-14	9.46596e-13	7.57888e-14
		37.67	1.27815e-12	1.32861e-13	7.7379e-13	7.19292e-14	9.47152e-13	7.49482e-14
		37.69	1.2748e-12	1.31189e-13	7.68323e-13	6.35368e-14	9.49156e-13	7.60069e-14
		37.71	1.26799e-12	1.322e-13	7.66312e-13	6.41173e-14	9.45337e-13	7.52615e-14
		37.73	1.26839e-12	1.32751e-13	7.78041e-13	7.209e-14	9.54619e-13	7.55652e-14
		37.75	1.26742e-12	1.32336e-13	7.77269e-13	7.2476e-14	9.42304e-13	7.56842e-14
		37.77	1.26968e-12	1.34421e-13	7.74714e-13	6.99172e-14	9.46308e-13	7.59233e-14
		37.79	1.26956e-12	1.31379e-13	7.72595e-13	7.08741e-14	9.44707e-13	7.55842e-14
		37.81	1.26968e-12	1.33371e-13	7.66375e-13	6.86711e-14	9.45136e-13	7.68389e-14
		37.83	1.26168e-12	1.33855e-13	7.68333e-13	6.83124e-14	9.44671e-13	7.53838e-14
		37.85	1.26835e-12	1.31254e-13	7.66902e-13	7.38184e-14	9.45413e-13	7.32925e-14
		37.87	1.26485e-12	1.31062e-13	7.68378e-13	6.70771e-14	9.46481e-13	7.66893e-14
		37.89	1.26786e-12	1.30687e-13	7.65757e-13	7.00468e-14	9.42098e-13	7.52765e-14
		37.91	1.2661e-12	1.3393e-13	7.65876e-13	6.86907e-14	9.3765e-13	7.41619e-14
		37.93	1.26328e-12	1.35253e-13	7.66308e-13	7.28364e-14	9.41169e-13	7.69622e-14
		37.95	1.26501e-12	1.29448e-13	7.63868e-13	6.86523e-14	9.4269e-13	7.64453e-14
		37.97	1.26132e-12	1.31813e-13	7.6131e-13	6.72859e-14	9.41312e-13	7.54226e-14
		37.99	1.26243e-12	1.33987e-13	7.62929e-13	6.83304e-14	9.38025e-13	7.73448e-14
		38.01	1.25983e-12	1.33742e-13	7.65429e-13	6.97396e-14	9.33481e-13	7.47456e-14
		38.03	1.25655e-12	1.33515e-13	7.66709e-13	7.40599e-14	9.40362e-13	7.76893e-14
		38.05	1.25656e-12	1.33967e-13	7.68164e-13	7.07309e-14	9.36765e-13	7.78484e-14
		38.07	1.25385e-12	1.32663e-13	7.67087e-13	6.77896e-14	9.36806e-13	7.88409e-14
		38.09	1.2568e-12	1.31036e-13	7.66564e-13	6.98239e-14	9.36856e-13	7.86692e-14
		38.11	1.25056e-12	1.3341e-13	7.67106e-13	6.79878e-14	9.34327e-13	7.79047e-14
		38.13	1.25498e-12	1.30213e-13	7.66505e-13	7.28664e-14	9.34909e-13	7.64347e-14
		38.15	1.26541e-12	1.27713e-13	7.60398e-13	6.56046e-14	9.3803e-13	8.00082e-14
		38.17	1.25263e-12	1.33404e-13	7.6156e-13	6.8117e-14	9.32049e-13	7.83741e-14
		38.19	1.24962e-12	1.32051e-13	7.62442e-13	7.17445e-14	9.31102e-13	7.68718e-14
		38.21	1.25656e-12	1.32203e-13	7.63358e-13	7.27233e-14	9.37773e-13	7.6529e-14
		38.23	1.25009e-12	1.30014e-13	7.64647e-13	7.33772e-14	9.30283e-13	7.706e-14
		38.25	1.2489e-12	1.30984e-13	7.63652e-13	7.08713e-14	9.25201e-13	7.72442e-14
		38.27	1.24361e-12	1.34258e-13	7.62542e-13	6.51213e-14	9.31154e-13	7.72061e-14
		38.29	1.23851e-12	1.30218e-13	7.56952e-13	6.69742e-14	9.28017e-13	7.97584e-14
		38.31	1.24165e-12	1.30952e-13	7.60336e-13	7.15887e-14	9.31916e-13	7.77309e-14
		38.33	1.24468e-12	1.26984e-13	7.54366e-13	6.97785e-14	9.2559e-13	7.84506e-14
		38.35	1.23844e-12	1.29622e-13	7.64136e-13	7.08574e-14	9.2824e-13	7.98033e-14
		38.37	1.2372e-12	1.30307e-13	7.63256e-13	7.13344e-14	9.25021e-13	7.92225e-14
		38.39	1.2424e-12	1.32095e-13	7.5948e-13	7.14765e-14	9.32552e-13	7.80707e-14
		38.41	1.24155e-12	1.28567e-13	7.56856e-13	7.31415e-14	9.33479e-13	7.82971e-14
		38.43	1.23826e-12	1.31387e-13	7.56084e-13	7.09852e-14	9.29046e-13	7.94216e-14
		38.45	1.24358e-12	1.28956e-13	7.54736e-13	6.85116e-14	9.30933e-13	7.94606e-14
		38.47	1.23705e-12	1.31426e-13	7.54897e-13	6.8356e-14	9.3232e-13	7.94905e-14
		38.49	1.24109e-12	1.30877e-13	7.55957e-13	7.1414e-14	9.31312e-13	7.92059e-14
		38.51	1.23533e-12	1.31741e-13	7.4892e-13	6.8887e-14	9.29769e-13	7.95226e-14
		38.53	1.23285e-12	1.33871e-13	7.59408e-13	7.1391e-14	9.27621e-13	7.9573e-14
		38.55	1.23709e-12	1.30753e-13	7.53242e-13	7.25525e-14	9.30317e-13	8.0714e-14
		38.57	1.22546e-12	1.32125e-13	7.59177e-13	7.11091e-14	9.28522e-13	7.98856e-14
		38.59	1.23206e-12	1.28725e-13	7.57002e-13	7.49905e-14	9.27515e-13	8.04913e-14
		38.61	1.22827e-12	1.28452e-13	7.50231e-13	7.22128e-14	9.27941e-13	7.97828e-14
		38.63	1.22675e-12	1.30222e-13	7.52565e-13	7.3102e-14	9.23915e-13	7.86599e-14
		38.65	1.2269e-12	1.30398e-13	7.55682e-13	7.4621e-14	9.30353e-13	7.90333e-14
		38.67	1.22725e-12	1.31986e-13	7.5867e-13	7.4084e-14	9.3171e-13	7.65963e-14
		38.69	1.22546e-12	1.31923e-13	7.57788e-13	7.08435e-14	9.29793e-13	7.97246e-14
		38.71	1.22646e-12	1.31289e-13	7.53729e-13	7.0573e-14	9.27411e-13	7.9364e-14
		38.73	1.22868e-12	1.29241e-13	7.56039e-13	7.41439e-14	9.2071e-13	7.85037e-14
		38.75	1.22898e-12	1.29828e-13	7.64055e-13	7.53542e-14	9.2571e-13	7.88394e-14
		38.77	1.22621e-12	1.3131e-13	7.53954e-13	7.36405e-14	9.21285e-13	7.82528e-14
		38.79	1.22394e-12	1.31368e-13	7.55658e-13	7.05914e-14	9.22925e-13	8.0073e-14
		38.81	1.22035e-12	1.31823e-13	7.55838e-13	7.22198e-14	9.18054e-13	7.81866e-14
		38.83	1.21722e-12	1.30662e-13	7.57179e-13	7.55308e-14	9.23512e-13	7.74097e-14
		38.85	1.21312e-12	1.28958e-13	7.50361e-13	6.92646e-14	9.16029e-13	7.51186e-14
		38.87	1.21942e-12	1.30445e-13	7.52999e-13	7.03488e-14	9.12875e-13	7.64021e-14
		38.89	1.21938e-12	1.28289e-13	7.48694e-13	6.78237e-14	9.19382e-13	7.63748e-14
		38.91	1.21417e-12	1.29156e-13	7.552e-13	7.54189e-14	9.20139e-13	7.57382e-14
		38.93	1.21469e-12	1.31713e-13	7.55894e-13	7.42376e-14	9.18134e-13	7.63948e-14
		38.95	1.2157e-12	1.31815e-13	7.55097e-13	7.02413e-14	9.12503e-13	7.77111e-14
		38.97	1.21636e-12	1.31001e-13	7.507e-13	7.32553e-14	9.18457e-13	7.64472e-14
		38.99	1.21863e-12	1.3028e-13	7.54684e-13	7.30755e-14	9.15201e-13	7.77658e-14
		39.01	1.21787e-12	1.30998e-13	7.55489e-13	7.23262e-14	9.14591e-13	7.47158e-14
		39.03	1.21672e-12	1.31422e-13	7.51653e-13	7.09723e-14	9.12358e-13	7.60335e-14
		39.05	1.22204e-12	1.30072e-13	7.50056e-13	7.13383e-14	9.1244e-13	7.68051e-14
		39.07	1.21378e-12	1.31112e-13	7.52481e-13	7.48237e-14	9.18943e-13	7.66344e-14
		39.09	1.21621e-12	1.32676e-13	7.49862e-13	6.9596e-14	9.10878e-13	7.79884e-14
		39.11	1.21689e-12	1.32608e-13	7.61438e-13	7.46181e-14	9.17652e-13	7.58149e-14
		39.13	1.21661e-12	1.34124e-13	7.52468e-13	6.81823e-14	9.15768e-13	7.57561e-14
		39.15	1.21727e-12	1.33472e-13	7.48943e-13	6.84246e-14	9.17454e-13	7.61844e-14
		39.17	1.21628e-12	1.34708e-13	7.48814e-13	7.22238e-14	9.1323e-13	7.64626e-14
		39.19	1.21692e-12	1.34467e-13	7.4235e-13	7.25699e-14	9.18556e-13	7.78017e-14
		39.21	1.21159e-12	1.32793e-13	7.56079e-13	7.48562e-14	9.12844e-13	7.65945e-14
		39.23	1.21259e-12	1.3221e-13	7.56963e-13	7.57005e-14	9.17786e-13	7.65133e-14
		39.25	1.21295e-12	1.32848e-13	7.49872e-13	7.25579e-14	9.16878e-13	7.74907e-14
		39.27	1.2121e-12	1.31e-13	7.48045e-13	7.28485e-14	9.17918e-13	7.54313e-14
		39.29	1.21039e-12	1.30947e-13	7.46107e-13	7.12518e-14	9.10593e-13	7.73979e-14
		39.31	1.20709e-12	1.33974e-13	7.50246e-13	7.67435e-14	9.11947e-13	7.8471e-14
		39.33	1.20538e-12	1.32679e-13	7.43868e-13	7.11464e-14	9.1197e-13	7.64926e-14
		39.35	1.20434e-12	1.30034e-13	7.45967e-13	7.80474e-14	9.17243e-13	7.89594e-14
		39.37	1.19691e-12	1.24404e-13	7.46125e-13	7.16721e-14	9.12343e-13	7.49845e-14
		39.39	1.18942e-12	1.23387e-13	7.4594e-13	7.04215e-14	9.10779e-13	7.5512e-14
		39.41	1.18355e-12	1.2303e-13	7.45319e-13	7.59822e-14	9.1073e-13	7.63623e-14
		39.43	1.18449e-12	1.20022e-13	7.46124e-13	7.82578e-14	9.12821e-13	7.73541e-14
		39.45	1.1797e-12	1.25423e-13	7.46682e-13	7.35925e-14	9.13768e-13	7.8415e-14
		39.47	1.18356e-12	1.24068e-13	7.34396e-13	7.43913e-14	9.08999e-13	7.73047e-14
		39.49	1.18052e-12	1.21914e-13	7.50468e-13	7.59443e-14	9.1443e-13	7.76539e-14
		39.51	1.1779e-12	1.21939e-13	7.46781e-13	7.68967e-14	9.10578e-13	7.78208e-14
		39.53	1.17788e-12	1.2149e-13	7.40981e-13	6.98541e-14	9.07754e-13	7.71609e-14
		39.55	1.18408e-12	1.20675e-13	7.45919e-13	7.46936e-14	9.0891e-13	7.56903e-14
		39.57	1.17972e-12	1.23244e-13	7.46136e-13	7.64434e-14	9.09862e-13	7.83137e-14
		39.59	1.18054e-12	1.22933e-13	7.46793e-13	7.36417e-14	9.10896e-13	7.72319e-14
		39.61	1.17878e-12	1.23761e-13	7.48079e-13	7.38698e-14	9.05918e-13	8.14614e-14
		39.63	1.17516e-12	1.22684e-13	7.45232e-13	7.55818e-14	9.08437e-13	7.7237e-14
		39.65	1.18202e-12	1.23523e-13	7.4576e-13	7.7144e-14	9.10115e-13	7.66167e-14
		39.67	1.17682e-12	1.23004e-13	7.42312e-13	7.2689e-14	9.10046e-13	7.72029e-14
		39.69	1.17673e-12	1.24963e-13	7.39629e-13	7.35065e-14	9.03519e-13	7.73725e-14
		39.71	1.17258e-12	1.22774e-13	7.40357e-13	7.70477e-14	9.10573e-13	7.48e-14
		39.73	1.17205e-12	1.21881e-13	7.43171e-13	7.59443e-14	9.07007e-13	7.71246e-14
		39.75	1.17384e-12	1.20625e-13	7.42468e-13	7.68502e-14	9.03577e-13	7.8639e-14
		39.77	1.1709e-12	1.21705e-13	7.36584e-13	7.77522e-14	9.08157e-13	7.74835e-14
		39.79	1.17271e-12	1.2157e-13	7.31419e-13	6.94199e-14	9.06171e-13	7.61244e-14
		39.81	1.17e-12	1.23131e-13	7.36261e-13	7.33725e-14	9.07634e-13	7.86336e-14
		39.83	1.17088e-12	1.21116e-13	7.3719e-13	7.31381e-14	9.04968e-13	7.59266e-14
		39.85	1.1688e-12	1.19382e-13	7.36144e-13	7.58834e-14	9.03199e-13	7.90908e-14
		39.87	1.17256e-12	1.21908e-13	7.31735e-13	7.14071e-14	9.05163e-13	7.87856e-14
		39.89	1.1705e-12	1.2198e-13	7.37829e-13	7.36456e-14	9.05895e-13	7.75714e-14
		39.91	1.17315e-12	1.22905e-13	7.36578e-13	7.53102e-14	8.94474e-13	7.90655e-14
[truncated: 2,967 more rows]

## Sheet: 20 ms x 10_10Hz
		Figure 1C_Cm traces								Figure 1C_10 Hz_endo-rate_bar graph data
		Time (S)	Control		Dynasore		Pitstop-2				Control	Dynasore	Pitstop-2
			Mean	SEM	Mean	SEM	Mean	SEM		Mean	3.46e-13	2.04e-13	1.31e-13
										SEM	4.01e-14	2.53e-14	2.46e-14
		0.01	1.92719e-14	1.88426e-14	-7.28197e-15	1.04683e-14	-2.04597e-14	4.57522e-14		n number	6	4	4
		0.02	1.40946e-14	6.26486e-15	-9.17493e-15	6.78531e-15	-2.59874e-14	2.85577e-14		p-value	-	0.017	0.004
		0.03	1.74512e-14	4.05401e-15	-5.8964e-15	2.693e-15	-2.1084e-14	2.51741e-14
		0.04	1.66529e-14	5.26545e-15	-1.00312e-14	7.52253e-15	-1.36234e-14	2.05033e-14
		0.05	2.13604e-14	5.85522e-15	-7.90407e-15	5.7861e-15	-2.3553e-14	2.51148e-14
		0.06	1.70516e-14	5.69538e-15	-8.32603e-15	5.58922e-15	-2.48945e-14	2.47489e-14
		0.07	1.88374e-14	3.00933e-15	-2.7044e-14	1.17944e-14	-1.84478e-14	2.46018e-14
		0.08	2.36293e-14	6.62736e-15	-5.04498e-15	7.11874e-15	-2.36109e-14	2.41105e-14
		0.09	1.30067e-14	4.16451e-15	-1.69454e-14	6.00426e-15	-1.86704e-14	2.3285e-14
		0.1	1.6119e-14	6.1116e-15	-1.41326e-14	7.64756e-15	-1.36053e-14	2.18211e-14
		0.11	1.88384e-14	6.37874e-15	-9.29324e-15	7.53933e-15	-1.60271e-14	2.39442e-14
		0.12	2.36654e-14	4.78894e-15	-1.39562e-14	7.24847e-15	-1.95356e-14	2.20218e-14
		0.13	1.68302e-14	5.01408e-15	-1.14344e-14	6.23489e-15	-1.59433e-14	2.29707e-14
		0.14	1.60719e-14	6.29865e-15	-6.52088e-15	3.48906e-15	-2.05438e-14	2.3153e-14
		0.15	1.42296e-14	5.57484e-15	-9.51799e-15	5.31036e-15	-1.94125e-14	2.66074e-14
		0.16	1.42999e-14	4.68106e-15	-9.66319e-15	5.00493e-15	-2.49963e-14	2.4995e-14
		0.17	1.81861e-14	3.7512e-15	-9.89292e-15	4.91876e-15	-1.54929e-14	2.5409e-14
		0.18	1.74521e-14	3.84906e-15	1.39535e-15	4.73037e-15	-2.46609e-14	2.7413e-14
		0.19	1.9257e-14	3.34163e-15	-1.02693e-14	6.83318e-15	-1.9686e-14	2.41889e-14
		0.2	1.86649e-14	7.77653e-15	-6.27989e-15	5.11177e-15	-1.63323e-14	2.61004e-14
		0.21	1.53655e-14	4.12575e-15	-8.1077e-15	5.7897e-15	-1.11707e-14	2.38135e-14
		0.22	1.60457e-14	3.4239e-15	-3.90075e-17	4.09664e-15	-1.8178e-14	2.36505e-14
		0.23	2.02959e-14	4.3081e-15	-9.3041e-15	4.64666e-15	-1.68254e-14	2.14742e-14
		0.24	1.37751e-14	8.73631e-15	-1.25675e-14	5.37458e-15	-1.38631e-14	2.16127e-14
		0.25	2.14423e-14	6.18028e-15	-6.49166e-15	4.76425e-15	-1.54622e-14	2.41761e-14
		0.26	1.88025e-14	4.51742e-15	-1.54442e-15	2.86608e-15	-1.86183e-14	2.15535e-14
		0.27	1.77252e-14	4.57153e-15	-6.09005e-15	3.05788e-15	-2.01509e-14	2.37068e-14
		0.28	1.65588e-14	5.45018e-15	-7.09792e-15	7.54431e-15	-2.26438e-14	2.32798e-14
		0.29	1.72505e-14	5.20163e-15	-1.19954e-14	6.28946e-15	-1.68207e-14	2.20975e-14
		0.3	1.26706e-14	6.40583e-15	-1.05189e-14	2.73801e-15	-1.97787e-14	2.21575e-14
		0.31	9.70368e-15	5.20556e-15	4.09894e-15	6.43043e-15	-1.62963e-14	2.11762e-14
		0.32	1.94467e-14	4.453e-15	-7.42397e-15	5.20041e-15	-1.34189e-14	1.94369e-14
		0.33	1.21909e-14	4.03312e-15	-6.77083e-15	5.09292e-15	-2.14714e-14	2.28972e-14
		0.34	1.36302e-14	5.39796e-15	-3.20501e-15	3.4727e-15	-2.20268e-14	2.54206e-14
		0.35	1.49904e-14	4.29783e-15	-6.09793e-15	2.76653e-15	-2.24029e-14	2.52029e-14
		0.36	1.70349e-14	5.87685e-15	-7.15638e-15	5.75046e-15	-2.00645e-14	2.34725e-14
		0.37	1.53579e-14	5.8911e-15	-1.31364e-14	3.50956e-15	-1.41352e-14	1.78337e-14
		0.38	1.50519e-14	5.41741e-15	-1.16943e-14	9.18324e-15	-1.68268e-14	1.97023e-14
		0.39	1.36562e-14	3.31804e-15	-6.31658e-15	2.20254e-15	-1.15012e-14	1.87451e-14
		0.4	7.96243e-15	4.93887e-15	-1.63473e-14	6.32338e-15	-2.48313e-14	2.4306e-14
		0.41	1.57958e-14	4.58019e-15	-2.80064e-15	2.71187e-15	-2.51972e-14	2.27432e-14
		0.42	1.47171e-14	4.94755e-15	-1.10205e-14	5.48004e-15	-2.19417e-14	2.07578e-14
		0.43	1.37007e-14	6.32348e-15	-3.82775e-15	5.79128e-15	-1.66589e-14	1.99258e-14
		0.44	1.53739e-14	5.23541e-15	-6.53733e-15	6.59003e-15	-1.3333e-14	1.84909e-14
		0.45	1.17857e-14	4.65282e-15	-1.23736e-14	2.69122e-15	-9.57104e-15	2.16227e-14
		0.46	1.39408e-14	5.79757e-15	-1.86042e-14	7.34528e-15	-2.17254e-14	2.47062e-14
		0.47	1.19486e-14	5.63571e-15	-1.21404e-14	6.44956e-15	-1.29591e-14	2.04111e-14
		0.48	1.36401e-14	6.08699e-15	-8.64191e-15	2.00839e-15	-1.16816e-14	1.75951e-14
		0.49	1.04844e-14	5.84522e-15	-1.15032e-14	3.29796e-15	-1.89133e-14	2.12273e-14
		0.5	1.24797e-14	6.51395e-15	-1.13418e-14	4.99515e-15	-1.82907e-14	2.04805e-14
		0.51	1.09858e-14	5.41542e-15	-1.07899e-14	7.20158e-15	-1.73353e-14	2.09364e-14
		0.52	7.67402e-15	4.31697e-15	-3.40839e-15	3.6792e-15	-2.06509e-14	2.23835e-14
		0.53	1.55221e-14	6.83475e-15	5.37668e-15	8.50828e-15	-1.5299e-14	2.03616e-14
		0.54	5.7188e-15	6.48598e-15	-2.73171e-15	1.45881e-15	-2.05727e-14	2.10436e-14
		0.55	9.39228e-15	5.12488e-15	-3.21211e-15	5.12118e-15	-1.86029e-14	2.20808e-14
		0.56	1.19258e-14	6.62678e-15	-7.36467e-15	3.48003e-15	-1.35068e-14	2.08456e-14
		0.57	7.75487e-15	5.99115e-15	-1.1139e-14	5.27742e-15	-2.52817e-14	2.42754e-14
		0.58	4.93777e-15	6.26061e-15	-6.00071e-15	6.14991e-15	-2.10725e-14	2.16413e-14
		0.59	1.04307e-14	5.53734e-15	-1.39515e-14	1.29577e-14	-1.74413e-14	2.05936e-14
		0.6	9.41483e-15	4.90516e-15	-8.23945e-15	3.24724e-15	-1.40268e-14	1.8101e-14
		0.61	1.26128e-14	5.53477e-15	-1.00518e-14	3.75795e-15	-1.89011e-14	1.63471e-14
		0.62	1.04098e-14	9.35454e-15	-1.86724e-14	9.6826e-15	-1.58936e-14	1.93728e-14
		0.63	1.47266e-14	5.72663e-15	-1.25876e-14	5.34948e-15	-1.56818e-14	2.15592e-14
		0.64	7.63359e-15	6.56135e-15	-9.85763e-15	9.33651e-15	-1.02156e-14	1.6451e-14
		0.65	9.67706e-15	5.40046e-15	-3.15274e-15	2.52677e-15	-1.49595e-14	1.64202e-14
		0.66	1.53402e-14	4.80267e-15	-1.30054e-14	3.0406e-15	-2.2029e-14	1.88576e-14
		0.67	1.36316e-14	6.2104e-15	-9.52149e-15	4.4718e-15	-1.21882e-14	1.78721e-14
		0.68	1.40558e-14	6.70484e-15	-1.35396e-14	5.2982e-15	-1.47228e-14	1.98733e-14
		0.69	1.03586e-14	6.31401e-15	-7.93721e-15	8.19091e-15	-1.88051e-14	1.97163e-14
		0.7	1.33088e-14	5.4863e-15	-3.49032e-15	2.00007e-15	-2.6193e-14	2.25501e-14
		0.71	7.11194e-15	6.40756e-15	-4.97887e-16	1.88679e-15	-2.13004e-14	2.03384e-14
		0.72	7.63537e-15	5.64866e-15	-9.80136e-15	6.20716e-15	-1.70981e-14	2.12119e-14
		0.73	9.24894e-15	8.10315e-15	-1.16106e-14	4.3631e-15	-2.2074e-14	1.8868e-14
		0.74	9.44757e-15	6.34998e-15	-5.79422e-15	2.99159e-15	-2.55617e-14	2.23177e-14
		0.75	9.21248e-15	7.13406e-15	-5.9094e-15	4.33431e-15	-2.58026e-14	2.0929e-14
		0.76	8.49986e-15	5.64505e-15	-1.10391e-15	1.01768e-14	-2.55043e-14	2.27323e-14
		0.77	1.17223e-14	4.68369e-15	-2.09213e-15	1.82463e-15	-2.08146e-14	1.89766e-14
		0.78	7.75943e-15	4.31094e-15	-1.00217e-14	3.21666e-15	-2.19571e-14	2.03363e-14
		0.79	1.33162e-14	8.056e-15	-1.01579e-14	4.71921e-15	-2.4623e-14	1.93478e-14
		0.8	1.46304e-14	9.50474e-15	-1.26276e-14	5.32011e-15	-2.6128e-14	2.23464e-14
		0.81	9.37016e-15	6.43961e-15	-1.00143e-14	5.16094e-15	-2.96255e-14	2.11584e-14
		0.82	9.72093e-15	5.50529e-15	-1.83611e-14	1.31635e-14	-2.35467e-14	2.1164e-14
		0.83	1.35637e-14	5.27266e-15	-1.40609e-14	6.11159e-15	-2.73601e-14	2.46398e-14
		0.84	4.98745e-15	7.65329e-15	-1.33647e-14	4.87857e-15	-2.5055e-14	2.28896e-14
		0.85	9.60612e-15	5.65892e-15	-3.77859e-15	5.67581e-15	-1.97073e-14	2.02791e-14
		0.86	6.82213e-15	5.47256e-15	-4.36584e-15	3.57157e-15	-2.40125e-14	2.07763e-14
		0.87	1.11415e-14	7.10681e-15	-7.889e-15	8.5478e-15	-2.77169e-14	2.25246e-14
		0.88	1.48832e-14	5.14326e-15	-7.4194e-15	8.95757e-15	-2.14589e-14	1.74146e-14
		0.89	5.6496e-15	5.44551e-15	-1.73889e-14	1.29281e-14	-3.30053e-14	2.66617e-14
		0.9	8.94982e-15	7.05678e-15	-1.48836e-14	7.78528e-15	-2.46495e-14	2.33461e-14
		0.91	1.28902e-14	4.50355e-15	-1.0961e-14	7.86051e-15	-2.21292e-14	1.91765e-14
		0.92	1.90609e-14	7.23601e-15	-1.26091e-14	1.12682e-14	-1.62077e-14	1.78421e-14
		0.93	1.02325e-14	6.50838e-15	-3.52005e-15	5.36557e-15	-2.39398e-14	2.32741e-14
		0.94	1.0974e-14	6.97712e-15	-1.24879e-14	5.77036e-15	-2.05246e-14	1.8299e-14
		0.95	1.36449e-14	6.36182e-15	-5.73241e-15	2.18833e-15	-2.20854e-14	2.06894e-14
		0.96	9.07961e-15	6.35076e-15	-1.40826e-14	9.10978e-15	-2.33011e-14	2.46497e-14
		0.97	5.64377e-15	5.56904e-15	-1.69898e-14	6.9917e-15	-1.44683e-14	1.71002e-14
		0.98	5.18089e-15	6.21594e-15	-1.79101e-14	9.24999e-15	-2.1603e-14	2.22884e-14
		0.99	9.58937e-15	4.20981e-15	-1.15783e-14	7.00523e-15	-2.14999e-14	2.27238e-14
		1	7.35353e-15	6.36774e-15	-7.82068e-15	3.55305e-15	-2.23809e-14	2.46984e-14
		1.01	8.52093e-15	5.20203e-15	-1.22778e-14	1.34374e-14	-1.80403e-14	2.04332e-14
		1.02	6.01654e-15	3.93422e-15	-6.32769e-15	3.17878e-15	-1.70986e-14	1.90287e-14
		1.03	8.77279e-15	5.62412e-15	-1.37514e-14	5.01107e-15	-2.17393e-14	1.95893e-14
		1.04	1.16368e-14	4.6487e-15	-1.17692e-14	6.84531e-15	-2.63909e-14	2.62436e-14
		1.05	8.38704e-15	5.60802e-15	-8.10985e-15	4.74847e-15	-2.15038e-14	2.23813e-14
		1.06	1.13564e-14	7.85395e-15	-8.45833e-15	3.01803e-15	-1.36724e-14	1.83508e-14
		1.07	1.06149e-14	4.83164e-15	-1.00613e-14	4.54997e-15	-1.47444e-14	1.91803e-14
		1.08	3.10706e-15	7.83255e-15	-8.67312e-15	4.19578e-15	-1.77786e-14	2.12571e-14
		1.09	2.48731e-15	5.37182e-15	-1.90456e-14	1.04696e-14	-2.33861e-14	2.32568e-14
		1.1	9.43674e-15	3.94037e-15	-4.1243e-15	6.46246e-15	-1.63543e-14	2.13256e-14
		1.11	7.64677e-15	3.97895e-15	-8.80091e-16	6.89824e-15	-1.967e-14	2.28549e-14
		1.12	2.9029e-15	5.05258e-15	-1.23402e-14	4.36344e-15	-1.70921e-14	1.97542e-14
		1.13	1.28398e-14	3.15733e-15	-1.70668e-14	8.01707e-15	-1.46524e-14	1.98995e-14
		1.14	2.69897e-15	5.33963e-15	-1.99094e-14	8.714e-15	-1.45362e-14	2.33171e-14
		1.15	4.90056e-15	4.26704e-15	-1.88138e-14	1.02885e-14	-1.79687e-14	2.4806e-14
		1.16	8.5734e-15	5.79438e-15	-1.23449e-14	3.74065e-15	-1.51643e-14	1.91348e-14
		1.17	1.13089e-14	7.89911e-15	-1.41977e-14	7.60012e-15	-1.62752e-14	2.11769e-14
		1.18	5.01574e-15	6.1956e-15	-2.22066e-14	9.30467e-15	-1.00721e-14	2.06341e-14
		1.19	6.69677e-15	4.08855e-15	-1.59595e-14	8.1842e-15	-1.04537e-14	2.0627e-14
		1.2	1.01889e-14	4.16567e-15	-1.62091e-14	7.23005e-15	-1.38838e-14	1.98601e-14
		1.21	6.2992e-15	5.6028e-15	-1.515e-14	5.9041e-15	-1.32093e-14	1.92159e-14
		1.22	4.49247e-15	6.93399e-15	-1.63203e-14	6.28498e-15	-1.03324e-14	2.03568e-14
		1.23	6.31188e-15	5.03046e-15	-1.24339e-14	2.54617e-15	-6.16241e-15	1.67985e-14
		1.24	7.94974e-15	5.32521e-15	-6.3556e-15	1.47336e-15	-1.49452e-14	1.96628e-14
		1.25	1.56128e-14	5.15229e-15	-1.7146e-14	9.37053e-15	-6.8858e-15	1.81632e-14
		1.26	9.66275e-15	3.73723e-15	-1.74881e-14	1.35523e-14	-4.94237e-15	1.49218e-14
		1.27	8.75997e-15	4.0428e-15	-8.67589e-15	4.13526e-15	-1.22081e-14	1.83783e-14
		1.28	1.40872e-14	6.53647e-15	-7.82155e-15	4.25695e-15	-1.08544e-14	2.13891e-14
		1.29	6.36781e-15	5.8943e-15	-1.2449e-14	5.8999e-15	-7.02314e-15	1.84716e-14
		1.3	1.11587e-14	5.74227e-15	-9.92617e-15	3.95185e-15	-1.25596e-14	2.03924e-14
		1.31	1.2763e-14	6.49823e-15	-1.89052e-14	5.53373e-15	-5.86005e-15	1.82643e-14
		1.32	1.09442e-14	8.37084e-15	-1.04919e-14	3.21196e-15	-8.42535e-15	1.66019e-14
		1.33	1.04109e-14	7.59307e-15	-1.61302e-14	5.72692e-15	-8.83526e-16	1.50073e-14
		1.34	1.07843e-14	5.00348e-15	-1.70666e-14	1.04863e-14	-1.05815e-14	2.21212e-14
		1.35	9.69732e-15	5.82328e-15	-1.6654e-14	9.13304e-15	-4.72823e-15	2.01369e-14
		1.36	1.01389e-14	5.77511e-15	-1.18231e-14	8.68046e-15	-7.06646e-15	1.61461e-14
		1.37	1.13434e-14	6.13405e-15	-1.39457e-14	3.95694e-15	-7.35121e-15	1.89284e-14
		1.38	1.19984e-14	6.18131e-15	-1.05672e-14	4.46218e-15	-5.94293e-15	1.42387e-14
		1.39	1.01618e-14	4.65146e-15	-1.30406e-14	6.98518e-15	-1.21506e-14	2.09339e-14
		1.4	1.39591e-14	5.92151e-15	-2.07711e-14	1.25003e-14	-1.41029e-14	2.2313e-14
		1.41	9.14743e-15	6.97656e-15	-1.35382e-14	8.49588e-15	-9.12802e-15	1.83334e-14
		1.42	1.54759e-14	4.7567e-15	-3.80728e-15	7.03864e-15	-6.25554e-15	1.97128e-14
		1.43	1.84548e-14	6.69111e-15	-5.84985e-15	2.49168e-15	-1.03146e-14	2.04015e-14
		1.44	8.55192e-15	3.63938e-15	-6.84358e-15	3.27931e-15	-1.19124e-14	2.2052e-14
		1.45	7.7486e-15	3.92224e-15	-1.33348e-14	9.08249e-15	-7.57708e-15	1.93633e-14
		1.46	5.20153e-15	7.91804e-15	-1.13298e-14	1.34435e-14	1.44477e-15	1.39269e-14
		1.47	4.04343e-15	5.70057e-15	2.30258e-15	4.71422e-15	-3.79808e-15	1.4828e-14
		1.48	7.60253e-15	4.46489e-15	-4.02646e-15	8.18436e-15	-8.83759e-15	1.56026e-14
		1.49	9.10439e-15	4.79247e-15	-8.42763e-15	1.073e-14	-1.44035e-14	2.48636e-14
		1.5	4.848e-15	6.92853e-15	-1.3298e-14	9.32153e-15	-1.23823e-14	2.3393e-14
		1.51	1.55837e-14	4.27268e-15	-1.26233e-14	7.97308e-15	-7.90458e-15	1.73388e-14
		1.52	5.33154e-15	5.09485e-15	-5.61722e-15	1.94927e-15	-3.47186e-15	1.68254e-14
		1.53	5.09531e-15	5.92677e-15	-8.94375e-15	6.17083e-15	-4.66575e-15	2.0158e-14
		1.54	2.80263e-15	5.63963e-15	-9.73394e-15	1.21595e-14	-4.23427e-15	1.32931e-14
		1.55	1.25198e-14	6.46301e-15	-3.80295e-15	5.85339e-15	-2.58653e-15	1.28644e-14
		1.56	1.05414e-14	4.768e-15	-9.96332e-15	6.27e-15	-2.66357e-15	1.32755e-14
		1.57	3.18393e-15	6.15492e-15	-2.02238e-14	9.29444e-15	-1.00316e-14	1.70469e-14
		1.58	9.63668e-15	4.44384e-15	-8.25253e-15	4.32999e-15	-7.00237e-15	1.4282e-14
		1.59	2.21689e-15	6.30699e-15	-5.75578e-15	3.05859e-15	-1.86917e-15	1.5332e-14
		1.6	-1.51595e-15	5.89273e-15	-1.61632e-14	6.05149e-15	-1.0464e-14	1.77069e-14
		1.61	5.63392e-15	3.43009e-15	-2.22947e-14	1.66396e-14	-3.38813e-15	1.60399e-14
		1.62	3.75217e-15	3.40537e-15	-1.84533e-14	1.09331e-14	-6.52329e-15	1.74491e-14
		1.63	4.89539e-15	6.74035e-15	-8.87211e-15	4.73069e-15	-7.28166e-15	1.73233e-14
		1.64	9.87959e-15	4.97894e-15	-1.63124e-14	1.10674e-14	-3.79783e-15	1.21303e-14
		1.65	5.98032e-15	3.55211e-15	-8.76507e-15	6.33407e-15	-7.4269e-15	1.81737e-14
		1.66	8.36864e-15	6.42582e-15	1.81647e-15	4.04255e-15	-6.83212e-15	1.26403e-14
		1.67	1.07249e-15	5.66609e-15	-7.46531e-15	6.9232e-15	-5.94702e-15	1.25781e-14
		1.68	6.48413e-15	7.20255e-15	-1.41215e-14	5.71031e-15	3.97558e-15	1.13981e-14
		1.69	1.31114e-14	8.58349e-15	-1.95887e-14	1.03578e-14	1.40213e-15	9.87321e-15
		1.7	1.13356e-14	9.73644e-15	-3.13325e-16	4.11072e-15	-7.44494e-15	1.24839e-14
		1.71	4.84761e-15	8.73155e-15	-8.19958e-15	8.70742e-15	-6.40216e-15	1.3183e-14
		1.72	1.00432e-14	1.13684e-14	1.23305e-16	5.77988e-15	-5.5046e-15	1.2751e-14
		1.73	8.78835e-15	6.23672e-15	-6.62466e-15	8.24598e-15	-5.78821e-15	1.08408e-14
		1.74	9.83399e-15	7.18012e-15	-4.54159e-15	6.23615e-15	-7.82085e-16	5.8977e-15
		1.75	6.99241e-15	6.37735e-15	-5.88354e-15	3.71349e-15	-4.45923e-15	1.26402e-14
		1.76	2.05959e-15	9.78762e-15	4.55911e-15	7.41681e-15	-1.25133e-14	1.10922e-14
		1.77	8.63896e-15	9.25977e-15	-5.48074e-15	9.19051e-15	-2.641e-15	6.29741e-15
		1.78	9.5052e-15	7.51726e-15	1.70904e-15	3.213e-15	-4.55564e-15	6.74181e-15
		1.79	1.39022e-14	6.90867e-15	-6.76348e-15	1.12239e-14	-6.54436e-15	6.10091e-15
		1.8	7.3659e-15	1.12141e-14	-8.69549e-15	8.0402e-15	-3.5254e-15	4.92765e-15
		1.81	9.92579e-15	7.79461e-15	-4.59711e-15	3.00623e-15	-5.23081e-15	3.54836e-15
		1.82	7.70266e-15	9.6453e-15	-4.09323e-15	5.80208e-15	-6.24887e-15	7.81089e-15
		1.83	8.26365e-15	9.55982e-15	-4.02274e-15	6.93681e-15	3.91524e-15	7.42592e-15
		1.84	9.49518e-15	8.61527e-15	-2.38053e-15	7.80993e-15	-2.4687e-16	3.64216e-15
		1.85	1.18676e-14	9.13111e-15	-1.49422e-14	1.25851e-14	-5.69968e-15	2.46582e-15
		1.86	1.09679e-14	1.57136e-14	-6.0206e-15	8.02961e-15	-3.93141e-15	4.64708e-15
		1.87	1.78166e-14	1.00789e-14	-1.1961e-14	1.02092e-14	-6.86882e-15	3.35326e-15
		1.88	1.24579e-14	8.83654e-15	3.69853e-16	4.38659e-15	6.25882e-17	4.05706e-15
		1.89	6.44854e-15	7.52684e-15	-3.17767e-15	5.91694e-15	-3.75576e-15	3.27471e-15
		1.9	7.43454e-15	6.58657e-15	-3.93633e-15	8.74488e-15	-3.39961e-15	3.7779e-15
		1.91	6.1377e-15	3.84567e-15	-5.94723e-15	9.7467e-15	-3.38836e-15	5.18276e-15
		1.92	-1.31096e-15	3.98493e-15	-4.36304e-15	5.88933e-15	-8.40141e-15	6.89188e-15
		1.93	-2.53248e-15	6.50737e-15	-9.28588e-15	1.17662e-14	3.09644e-15	4.54248e-15
		1.94	1.46701e-15	4.65057e-15	-7.84868e-15	1.01718e-14	-2.60296e-15	3.14197e-15
		1.95	-8.70792e-16	7.4921e-15	-6.7207e-15	1.86049e-15	-1.12192e-15	7.25134e-16
		1.96	-5.18366e-15	8.30264e-15	-5.72674e-16	5.89262e-15	-4.87593e-15	6.47439e-15
		1.97	-5.19234e-15	7.60594e-15	-1.10105e-16	2.79577e-15	-5.81673e-15	3.30253e-15
		1.98	-3.42678e-15	7.07784e-15	-2.40865e-15	4.52727e-15	-6.71738e-15	4.21944e-15
		1.99	-2.90585e-15	4.83283e-15	-7.16626e-15	6.95173e-15	-6.16162e-15	3.21585e-15
		2	-2.76833e-15	5.90706e-15	-1.00283e-14	7.49249e-15	-3.23183e-15	4.56312e-15
		2.01	-1.82452e-15	6.0238e-15	-6.6879e-15	8.86075e-15	-2.8956e-15	2.16321e-15
		2.02	3.60099e-15	4.84078e-15	-4.44562e-15	4.27219e-15	-5.48861e-15	6.0024e-15
		2.03	-1.38229e-16	2.49789e-15	-1.14506e-14	1.52022e-14	-5.23218e-15	3.15202e-15
		2.04	-4.53191e-15	6.63747e-15	-9.05994e-16	2.86894e-15	-9.35731e-15	7.4648e-15
		2.05	-8.96872e-16	4.60674e-15	-4.64064e-16	5.35998e-15	-4.68522e-15	4.4416e-15
		2.06	2.4595e-15	4.65822e-15	-9.04334e-15	8.46445e-15	-3.1319e-15	3.60823e-15
		2.07	4.17687e-15	4.44933e-15	1.84779e-15	5.40702e-15	-3.64679e-15	4.19672e-15
		2.08	4.18952e-15	6.26342e-15	-3.95332e-15	5.56683e-15	6.27777e-15	7.21823e-15
		2.09	7.43868e-15	7.59366e-15	3.2654e-15	8.40792e-15	-6.89906e-15	3.91784e-15
		2.1	6.05302e-15	7.70005e-15	-5.30313e-15	2.55193e-15	-3.35797e-15	2.18195e-15
		2.11	5.70324e-15	4.83612e-15	-2.77152e-15	3.53555e-15	-1.23308e-15	1.67814e-15
		2.12	-1.58181e-16	2.61542e-15	-7.611e-15	7.16846e-15	-3.9218e-15	4.56034e-15
		2.13	1.8834e-15	5.90157e-15	4.85877e-15	7.63176e-15	-2.36994e-15	1.51827e-15
		2.14	6.62327e-16	4.07186e-15	-1.50759e-14	1.35273e-14	-4.4156e-15	1.91214e-15
		2.15	4.37127e-15	3.93619e-15	-9.31584e-15	5.47045e-15	2.05388e-15	7.56731e-15
		2.16	7.24334e-15	7.05602e-15	-4.00588e-15	6.44446e-15	-4.42802e-16	4.56454e-15
		2.17	9.09727e-15	4.11257e-15	-5.60813e-15	5.97432e-15	-7.25759e-15	3.60073e-15
		2.18	-1.04523e-15	4.3561e-15	-3.00603e-15	6.39019e-15	-2.60944e-15	2.56715e-15
		2.19	9.24717e-17	6.21199e-15	-4.1101e-15	7.59698e-15	-9.44424e-15	7.99718e-15
		2.2	5.57356e-15	5.35711e-15	1.21471e-15	6.63053e-15	1.2373e-15	3.91335e-15
		2.21	1.65792e-15	4.04248e-15	-3.78462e-15	2.93557e-15	-3.54616e-15	2.03166e-15
		2.22	2.52988e-15	2.99554e-15	1.04599e-15	2.81477e-15	-6.51732e-15	3.23958e-15
		2.23	5.02819e-15	2.03197e-15	6.27407e-15	5.78202e-15	-5.81216e-15	6.75121e-15
		2.24	4.55703e-15	4.40825e-15	1.07362e-15	8.02486e-15	-7.19902e-15	5.3191e-15
		2.25	2.80503e-15	2.83956e-15	-4.70352e-15	9.29705e-15	-1.02973e-14	6.73662e-15
		2.26	-1.04083e-15	7.0643e-15	-8.81838e-15	1.39078e-14	-6.21511e-15	2.11923e-15
		2.27	3.56849e-15	5.65549e-15	-1.83452e-15	4.68148e-15	-5.39232e-15	5.41523e-15
		2.28	-1.85197e-15	4.46391e-15	-7.70073e-15	5.66471e-15	-9.47698e-15	1.18286e-14
		2.29	8.01735e-15	4.94977e-15	-7.54382e-15	8.42491e-15	6.3731e-16	1.65151e-15
		2.3	1.31925e-15	3.11379e-15	-7.39365e-15	7.87654e-15	6.5682e-15	5.49699e-15
		2.31	-7.87961e-15	6.01479e-15	-3.72896e-15	5.47903e-15	-1.15308e-15	4.26533e-15
		2.32	1.88189e-15	5.06449e-15	-2.17469e-15	4.04591e-15	-5.27513e-15	2.29978e-15
		2.33	9.48711e-16	4.18226e-15	-9.26295e-15	1.08125e-14	-2.89484e-16	4.02838e-15
		2.34	1.379e-15	1.50429e-15	-1.06226e-14	1.4011e-14	1.55214e-15	3.80033e-15
		2.35	-1.97942e-15	5.10013e-15	-3.73838e-15	5.76979e-15	4.36258e-15	4.20757e-15
		2.36	1.32633e-15	5.75781e-15	7.10857e-15	6.09348e-15	-1.09193e-15	3.60142e-15
		2.37	3.48577e-15	4.46923e-15	-4.85804e-15	3.9569e-15	8.62248e-16	4.83614e-15
		2.38	5.1674e-15	4.30835e-15	-2.64951e-15	1.01739e-14	-2.02407e-15	3.61393e-15
		2.39	-6.99412e-16	2.5809e-15	4.18071e-15	5.3535e-15	-3.05878e-15	3.65857e-15
		2.4	1.82321e-15	2.65474e-15	-2.10418e-15	6.61167e-15	3.8023e-15	3.75434e-15
		2.41	6.05093e-16	4.87706e-15	-5.56232e-15	1.03511e-14	6.81286e-15	5.01413e-15
		2.42	2.81797e-15	3.11229e-15	3.46425e-15	3.82481e-15	-4.60766e-15	5.12852e-15
		2.43	5.77135e-15	4.05072e-15	-3.48631e-15	5.89712e-15	-3.23917e-16	2.08921e-15
		2.44	3.36861e-15	5.87388e-15	3.96922e-15	4.39155e-15	3.75328e-15	3.1501e-15
		2.45	9.77898e-16	5.70967e-15	-5.32142e-15	4.84094e-15	3.65663e-15	3.1087e-15
		2.46	6.15487e-15	8.78714e-15	-3.75712e-15	8.90578e-15	1.2536e-15	2.80879e-15
		2.47	-3.01072e-15	3.9706e-15	-4.54248e-15	6.27202e-15	8.10967e-15	8.41801e-15
		2.48	-3.42601e-15	4.39858e-15	-7.83398e-15	8.03526e-15	-3.26982e-15	3.68297e-15
		2.49	1.87227e-15	4.1899e-15	-2.80776e-15	7.95601e-15	-4.05423e-15	2.17381e-15
		2.5	6.07424e-15	5.84464e-15	-9.99139e-15	1.33444e-14	-7.77658e-15	7.43764e-15
		2.51	2.14795e-15	3.43747e-15	-1.0883e-14	1.32845e-14	8.51257e-15	5.4218e-15
		2.52	3.97902e-15	3.81912e-15	-1.43873e-15	6.68963e-15	-4.84992e-15	4.71189e-15
		2.53	-1.10322e-15	3.1564e-15	2.21231e-15	7.72759e-15	-4.86865e-15	2.30958e-15
		2.54	2.4371e-16	1.87329e-15	2.58067e-15	9.7847e-15	-4.04898e-15	6.08955e-15
		2.55	4.28183e-16	5.73251e-15	2.53753e-16	5.26542e-15	9.53846e-16	2.2179e-15
		2.56	3.06092e-15	3.63882e-15	4.45544e-15	5.0652e-15	-3.63427e-15	1.54137e-15
		2.57	-1.32169e-15	5.65146e-15	-1.60564e-15	6.60428e-15	-5.60119e-16	3.48658e-15
		2.58	3.3676e-15	3.74211e-15	3.76929e-16	4.71375e-15	4.71637e-15	8.49771e-15
		2.59	6.2845e-15	6.62794e-15	-2.47416e-15	7.24645e-15	-2.98209e-15	2.94885e-15
		2.6	-1.12235e-15	4.80547e-15	-3.78095e-15	6.55447e-15	3.30047e-15	6.08907e-15
		2.61	4.3429e-15	1.74167e-15	5.55241e-15	3.08316e-15	-1.64169e-15	1.91941e-15
		2.62	1.22895e-15	1.69096e-15	1.60434e-15	4.64639e-15	3.42549e-15	6.21646e-15
		2.63	7.47033e-16	1.99995e-15	-1.66231e-14	1.16146e-14	1.18928e-15	2.36617e-15
		2.64	-2.46145e-15	3.67861e-15	2.82892e-16	1.8856e-15	1.6576e-16	1.3061e-15
		2.65	2.14972e-15	3.16478e-15	-6.9995e-15	7.24965e-15	-1.05754e-15	2.35144e-15
		2.66	3.32374e-15	2.3928e-15	-6.80851e-15	4.44897e-15	1.90745e-15	6.01812e-15
		2.67	5.74014e-15	2.66793e-15	-5.17777e-15	5.95751e-15	8.77067e-15	8.11962e-15
		2.68	3.92175e-15	3.63861e-15	-6.48936e-15	4.92419e-15	1.58984e-15	2.34852e-15
		2.69	-1.51774e-15	3.68632e-15	5.46879e-15	6.31048e-15	-5.07699e-16	3.63014e-15
		2.7	9.44149e-15	4.55294e-15	7.77108e-15	5.00809e-15	-2.1606e-15	2.32781e-15
		2.71	2.32395e-15	4.0772e-15	-8.24096e-15	6.76181e-15	-2.24455e-15	1.2607e-15
		2.72	1.85059e-15	3.59345e-15	6.57378e-15	5.61012e-15	-8.06046e-15	2.43964e-15
		2.73	-1.73996e-15	3.83353e-15	-1.14596e-15	8.02633e-15	-3.40953e-15	3.75329e-15
		2.74	-6.61288e-16	2.26143e-15	-4.47954e-15	5.80827e-15	6.48762e-15	5.94999e-15
		2.75	4.09396e-15	2.35046e-15	-7.51501e-15	8.07249e-15	4.82605e-15	2.96036e-15
		2.76	-1.53672e-15	2.66306e-15	3.20976e-15	9.60765e-15	-4.5013e-17	2.49259e-15
		2.77	1.43548e-15	1.25729e-15	1.85044e-15	7.85251e-15	-7.96448e-15	4.13293e-15
		2.78	3.56213e-15	5.27215e-15	3.06096e-15	1.13575e-14	-3.7159e-15	1.81323e-15
		2.79	-3.04353e-15	4.45683e-15	4.99352e-15	5.6591e-15	1.57942e-15	5.15119e-15
		2.8	-4.36188e-16	2.32626e-15	-3.80571e-15	8.60469e-15	4.74153e-15	6.89676e-15
		2.81	-1.83595e-15	3.63603e-15	-2.55607e-16	1.02939e-14	4.95925e-15	4.32297e-15
		2.82	-3.59099e-16	3.18976e-15	5.4282e-15	8.96001e-15	-1.22131e-15	2.2244e-15
		2.83	-4.19437e-15	5.23257e-15	8.01116e-15	6.31402e-15	-5.28676e-15	5.01907e-15
		2.84	-4.97394e-17	5.00132e-15	-9.20284e-15	7.69008e-15	4.14355e-15	5.89527e-15
		2.85	1.91611e-15	4.60356e-15	-1.56251e-15	1.28062e-15	4.16548e-15	3.26579e-15
		2.86	-3.06405e-15	3.23388e-15	4.8412e-15	5.63486e-15	4.69103e-15	9.06296e-15
		2.87	-4.79846e-15	3.86612e-15	3.50305e-15	6.64592e-15	-3.22795e-15	4.29158e-15
		2.88	-1.38994e-15	4.00873e-15	6.9302e-16	4.92569e-15	-2.75238e-16	3.48181e-15
		2.89	2.79155e-15	4.96307e-15	6.54266e-15	6.80585e-15	4.26841e-16	3.11491e-15
		2.9	4.06354e-15	3.51111e-15	2.62169e-15	1.03549e-14	-5.10263e-16	3.39739e-15
		2.91	-6.51629e-16	4.15714e-15	-4.90535e-15	8.95899e-15	6.08232e-16	2.78558e-15
		2.92	5.38647e-16	4.08359e-15	-7.00499e-15	4.41108e-15	-2.23e-15	2.06904e-15
		2.93	-3.06775e-15	5.45992e-15	-2.64575e-15	4.02779e-15	-4.71694e-15	4.19875e-15
		2.94	-2.96491e-15	6.17727e-15	-1.88258e-15	1.13678e-14	-4.00412e-15	4.48858e-15
		2.95	-1.7282e-15	3.47707e-15	-5.18191e-15	7.96779e-15	5.02407e-15	1.10886e-14
		2.96	-6.09457e-15	3.31934e-15	-5.62853e-15	9.32275e-15	2.55618e-15	8.08349e-15
		2.97	-8.59233e-16	2.38145e-15	1.9836e-15	6.81828e-15	1.02512e-15	1.12926e-14
		2.98	3.65948e-15	3.54287e-15	4.08785e-15	1.07342e-14	-2.85511e-15	2.38084e-15
		2.99	-1.90771e-15	4.55496e-15	3.51179e-16	5.55618e-15	2.225e-15	7.98203e-15
		3	-2.11416e-15	1.3812e-15	-8.32968e-15	1.18354e-14	-4.75145e-15	3.24987e-15
		3.01	-3.79575e-15	2.45358e-15	4.04946e-15	7.99941e-15	-1.70736e-15	7.21298e-15
		3.02	-6.35877e-16	2.74761e-15	-4.17705e-15	7.95801e-15	-8.75353e-15	5.77296e-15
		3.03	-6.05256e-16	2.55154e-15	3.12321e-15	6.773e-15	2.4847e-15	8.59814e-15
		3.04	1.70144e-16	4.95444e-15	5.42573e-15	8.78393e-15	-6.05235e-15	4.75883e-15
		3.05	-1.45078e-15	1.77999e-15	1.26007e-15	8.29885e-15	-1.10735e-14	7.74679e-15
		3.06	-2.41388e-15	3.20242e-15	4.79095e-15	6.21961e-15	-1.47184e-14	1.11156e-14
		3.07	-6.10975e-15	2.19727e-15	2.23731e-15	8.73152e-15	-1.18252e-14	7.45022e-15
		3.08	-1.05928e-15	4.07626e-15	-1.89053e-15	1.05008e-14	-7.60962e-15	5.01027e-15
		3.09	-3.26946e-15	2.30797e-15	-2.43831e-14	3.35577e-14	3.71136e-16	8.07118e-15
		3.1	1.67832e-15	3.13221e-15	-2.22889e-14	3.0835e-14	-4.38806e-15	7.55634e-15
		3.11	3.76817e-17	3.67527e-15	-3.47704e-14	4.25105e-14	-5.01979e-15	6.85699e-15
		3.12	-5.7704e-15	2.74938e-15	-1.06951e-14	1.71773e-14	3.09391e-16	9.55876e-15
		3.13	-8.37482e-15	2.35489e-15	4.133e-15	7.29048e-15	1.27449e-15	1.28285e-14
		3.14	-2.42839e-15	2.50896e-15	-5.21845e-15	1.04559e-14	-4.60355e-15	8.41714e-15
		3.15	-4.49503e-15	1.8276e-15	2.70696e-15	8.59341e-15	-5.35671e-16	6.29946e-15
		3.16	-5.62347e-16	5.17832e-15	1.18089e-14	8.48827e-15	-6.77644e-15	7.41181e-15
		3.17	-8.46232e-15	3.48199e-15	4.18336e-16	8.37957e-15	-1.3477e-14	8.31838e-15
		3.18	-1.0125e-16	5.27863e-15	2.29051e-15	7.45226e-15	-3.4053e-15	9.72994e-15
		3.19	-8.86823e-15	2.98638e-15	-2.02297e-15	1.29313e-14	-1.16787e-14	1.00252e-14
		3.2	-5.01502e-15	3.57921e-15	6.5311e-16	1.19995e-14	-3.54611e-15	8.7869e-15
		3.21	-5.45e-16	3.54485e-15	-1.74017e-15	1.23513e-14	-6.98275e-16	7.67547e-15
		3.22	-9.01492e-15	3.70513e-15	-4.62496e-15	1.4156e-14	-1.03023e-14	7.40243e-15
		3.23	-1.95575e-15	3.10209e-15	7.2815e-15	6.49958e-15	-5.2501e-15	5.26534e-15
		3.24	-8.55627e-16	4.89676e-15	1.64398e-15	6.67365e-15	1.84686e-15	8.99704e-15
		3.25	-4.64179e-15	1.52465e-15	2.98585e-16	8.16981e-15	-3.64592e-15	6.84478e-15
		3.26	-2.34006e-15	4.27373e-15	2.6596e-15	6.66131e-15	-2.60854e-15	7.35848e-15
		3.27	-3.49899e-15	2.64113e-15	3.25731e-15	1.84307e-15	-1.06888e-14	7.3219e-15
		3.28	-5.38228e-15	3.39636e-15	-3.21042e-15	7.25149e-15	-5.72281e-15	6.32809e-15
		3.29	-2.19734e-15	3.54787e-15	4.17207e-15	7.84263e-15	-1.04599e-14	6.28369e-15
		3.3	9.71337e-16	3.62053e-15	3.58415e-15	8.42296e-15	-9.36458e-15	6.82726e-15
		3.31	1.03512e-15	2.89452e-15	-3.33295e-15	8.97057e-15	-9.04932e-15	6.5267e-15
		3.32	-4.91959e-15	3.02513e-15	-1.61481e-15	1.18366e-14	-9.73082e-15	7.57921e-15
		3.33	-4.25537e-15	3.54252e-15	4.63468e-15	9.13139e-15	-9.64614e-15	5.42803e-15
		3.34	-1.4216e-15	4.04214e-15	-6.67457e-15	1.23433e-14	-1.01658e-14	5.71969e-15
		3.35	-3.99307e-15	3.505e-15	-2.63807e-16	7.4553e-15	-9.68134e-15	6.27718e-15
		3.36	-2.11956e-16	2.37584e-15	2.49664e-15	8.50692e-15	-9.64013e-15	3.50535e-15
		3.37	-5.08463e-15	2.40967e-15	7.88422e-16	8.22548e-15	-1.22467e-14	9.5007e-15
		3.38	-1.62498e-16	3.63958e-15	-1.83355e-15	1.0323e-14	-1.01419e-14	3.66158e-15
		3.39	-5.51933e-15	4.67731e-15	-7.0603e-15	1.17856e-14	-6.75189e-15	4.70945e-15
		3.4	-3.6253e-15	2.6532e-15	-3.78812e-15	7.56653e-15	-5.28043e-15	4.22922e-15
		3.41	-1.52729e-15	3.25312e-15	-3.72114e-15	8.37248e-15	-7.81419e-15	5.27168e-15
		3.42	-8.15741e-15	1.19974e-15	-4.88237e-15	1.09894e-14	-4.83906e-15	2.14292e-15
		3.43	-5.1433e-15	3.56467e-15	-1.464e-16	7.94106e-15	-8.5973e-15	5.49128e-15
		3.44	3.03208e-16	4.13269e-15	6.96794e-15	9.04462e-15	-1.19225e-14	3.27808e-15
		3.45	-2.99604e-15	3.51735e-15	-9.26564e-16	5.67208e-15	-5.40926e-15	4.33347e-15
		3.46	2.32301e-15	3.95508e-15	4.51293e-16	5.12844e-15	-6.95129e-15	4.36087e-15
		3.47	-3.14167e-15	2.95611e-15	6.828e-16	7.30571e-15	-9.18077e-15	5.89349e-15
		3.48	1.29221e-15	7.00758e-15	-5.97983e-16	7.28951e-15	-7.23634e-15	7.15781e-15
		3.49	-2.42771e-15	4.16116e-15	-1.97161e-15	1.0375e-14	-4.29027e-15	3.62723e-15
		3.5	-2.97699e-15	3.10787e-15	5.29355e-15	8.59336e-15	-4.38395e-15	5.09786e-15
		3.51	-2.53247e-15	2.66048e-15	1.06833e-15	7.08991e-15	-4.4807e-15	3.7342e-15
		3.52	1.40266e-15	5.32417e-15	-2.03712e-15	7.80389e-15	-2.89737e-15	6.47906e-15
		3.53	4.1858e-15	4.50838e-15	3.42499e-15	5.42043e-15	-4.75416e-15	4.44251e-15
		3.54	3.29515e-15	6.38634e-15	8.84031e-15	8.45769e-15	-3.86004e-15	6.4777e-15
		3.55	4.21952e-15	5.57095e-15	-1.00355e-15	6.74543e-15	2.93757e-15	3.64681e-15
		3.56	-3.45183e-15	4.07845e-15	2.5886e-17	6.79715e-15	-9.70239e-16	2.96377e-15
		3.57	-1.93977e-15	3.21155e-15	3.09645e-15	5.16295e-15	-6.52443e-15	7.2502e-15
		3.58	-2.30985e-15	3.26857e-15	1.73099e-16	5.31791e-15	-8.77092e-15	5.3047e-15
		3.59	1.43705e-16	2.6703e-15	-3.24948e-15	9.75192e-15	-5.2782e-15	6.76037e-15
		3.6	2.70834e-15	4.33147e-15	-2.71832e-15	1.04099e-14	1.3108e-15	5.40892e-15
		3.61	-3.56641e-15	3.21302e-15	2.6117e-15	9.50638e-15	-1.78039e-15	2.3774e-15
		3.62	-2.31339e-15	5.29439e-15	8.25321e-15	7.6868e-15	-6.57421e-15	4.1765e-15
		3.63	-5.10759e-15	3.30984e-15	3.78169e-15	6.35026e-15	-6.94641e-15	3.75234e-15
		3.64	-2.68028e-15	3.48084e-15	1.30264e-15	8.3963e-15	-4.78182e-15	5.41048e-15
		3.65	-1.05613e-15	2.72562e-15	2.02219e-15	3.60224e-15	-5.4449e-15	4.16541e-15
		3.66	-2.9329e-15	5.3616e-15	7.70411e-15	4.08137e-15	-1.87033e-15	2.66428e-15
		3.67	-2.39834e-18	5.01564e-15	1.31964e-15	4.86052e-15	7.06773e-17	5.52486e-15
		3.68	1.03919e-15	8.1566e-15	-4.98913e-15	1.56782e-14	-7.48293e-15	9.54798e-15
		3.69	-1.42788e-15	4.46548e-15	6.79585e-15	7.90504e-15	-2.96186e-15	5.70393e-15
		3.7	-3.4994e-15	5.22498e-15	5.37925e-16	8.64987e-15	3.21715e-15	4.91471e-15
		3.71	-2.36188e-15	4.10924e-15	-4.8888e-15	5.25117e-15	5.42778e-15	3.96741e-15
		3.72	2.06959e-15	7.40134e-15	5.94799e-16	7.0285e-15	5.05105e-15	3.25779e-15
		3.73	-4.18043e-15	4.11878e-15	-8.00533e-15	8.42554e-15	-2.37251e-15	4.62981e-15
		3.74	-9.56303e-15	4.25937e-15	2.04523e-15	4.55373e-15	9.37535e-15	6.43595e-15
		3.75	-8.97399e-15	4.32149e-15	-5.3041e-15	9.92641e-15	-4.85502e-15	6.37969e-15
		3.76	-4.22497e-16	8.53611e-15	7.74979e-15	6.33802e-15	-9.99514e-15	9.72444e-15
		3.77	2.57252e-16	9.39917e-15	3.12126e-15	3.12292e-15	-3.60232e-15	5.1975e-15
		3.78	1.83613e-15	6.8735e-15	-6.44744e-15	8.42851e-15	-5.37195e-15	4.84732e-15
		3.79	-4.26239e-15	2.46271e-15	5.16362e-15	6.25761e-15	-5.47718e-15	6.56376e-15
		3.8	3.00413e-15	5.86295e-15	2.41098e-15	4.04473e-15	1.21611e-15	5.32473e-15
		3.81	-1.70163e-15	4.11341e-15	8.75804e-16	3.73504e-15	-3.64438e-15	6.57548e-15
		3.82	1.72396e-15	3.36773e-15	-5.10133e-16	5.13196e-15	-3.59085e-15	6.78376e-15
		3.83	4.09e-15	4.65013e-15	-2.05509e-15	1.10756e-14	-3.97553e-15	3.38708e-15
		3.84	4.34776e-15	5.06999e-15	2.94575e-15	5.72463e-15	-5.92289e-16	1.82582e-15
		3.85	1.72819e-15	5.88569e-15	-9.06633e-15	9.18018e-15	1.67634e-15	2.89199e-15
		3.86	4.87834e-15	7.70235e-15	-1.45782e-15	5.71154e-15	3.77844e-15	4.64505e-15
		3.87	1.32424e-15	4.55737e-15	9.27581e-16	5.44048e-15	-7.6794e-15	6.10509e-15
		3.88	-1.73901e-15	5.1414e-15	8.89037e-16	7.6117e-15	-1.38768e-15	3.62138e-15
		3.89	1.86894e-15	7.93646e-15	6.52737e-15	4.44239e-15	3.30762e-15	2.05011e-15
		3.9	1.2731e-15	8.36283e-15	7.07841e-16	2.91414e-15	-5.18846e-16	8.32688e-15
		3.91	-1.13856e-16	6.19143e-15	8.1338e-15	5.55305e-15	-1.4633e-15	3.12708e-15
		3.92	-4.27173e-15	5.24795e-15	4.18827e-15	4.57207e-15	-1.97644e-15	6.87604e-15
		3.93	5.47261e-15	6.12903e-15	3.69372e-15	6.1527e-15	-5.52488e-15	3.66652e-15
		3.94	3.58882e-15	7.92299e-15	5.33642e-16	6.63955e-15	-7.59978e-15	7.91369e-15
		3.95	-3.21988e-15	5.97139e-15	5.10983e-15	3.95047e-15	-8.64038e-15	1.1129e-14
		3.96	-1.03446e-15	2.2906e-15	4.97874e-16	5.32496e-15	-8.62124e-15	1.36446e-14
		3.97	-4.76089e-15	4.9901e-15	1.50701e-15	6.50859e-15	-8.30454e-15	1.21023e-14
		3.98	-1.59555e-15	3.54856e-15	-5.61729e-15	1.02915e-14	-1.58897e-15	6.65948e-15
		3.99	-4.37927e-16	3.72265e-15	-6.3801e-15	8.5447e-15	-1.4878e-15	5.66967e-15
		4	-3.16979e-15	2.43247e-15	2.71431e-17	2.62477e-15	-1.76591e-15	6.75454e-15
		4.01	-1.62969e-15	3.29614e-15	-6.05124e-16	2.45251e-15	-1.88962e-15	8.15078e-15
		4.02	1.03974e-15	3.79524e-15	3.07075e-15	3.5218e-15	-1.14064e-15	7.65503e-15
		4.03	2.42371e-15	2.08681e-15	-2.14918e-16	6.77024e-15	3.23632e-16	7.20209e-15
		4.04	-3.23926e-15	3.85988e-15	-9.78011e-16	4.44699e-15	-5.26777e-15	6.98943e-15
		4.05	1.41473e-15	2.54275e-15	-8.06558e-15	7.02662e-15	-4.35396e-15	5.88308e-15
		4.06	1.796e-15	3.15387e-15	1.47676e-15	2.64593e-15	-4.19943e-15	5.76967e-15
		4.07	1.80111e-15	3.75313e-15	-2.82033e-16	3.83411e-15	-6.08498e-15	2.63606e-15
		4.08	-1.62337e-15	1.73269e-15	6.62299e-16	4.84601e-15	-7.89979e-16	5.80951e-15
		4.09	2.35248e-15	4.15423e-15	3.37396e-15	7.25229e-15	-2.01169e-15	4.18791e-15
		4.1	6.53893e-17	3.16526e-15	-7.86002e-15	2.77359e-15	4.85028e-15	3.30629e-15
		4.11	3.51942e-15	3.76398e-15	-7.34207e-15	3.62597e-15	-3.89448e-15	6.7334e-15
		4.12	4.86639e-16	4.21751e-15	-5.70564e-15	5.62049e-15	-3.40813e-15	5.79148e-15
		4.13	-1.38318e-15	3.17401e-15	-4.819e-15	5.34467e-15	4.94665e-16	1.74781e-15
		4.14	-1.4585e-15	3.2897e-15	-5.44138e-15	3.42742e-15	-8.43154e-16	3.42654e-15
		4.15	8.14632e-16	4.83678e-15	-8.0767e-15	5.46873e-15	-6.7561e-17	4.53575e-15
		4.16	-2.45335e-15	3.05578e-15	-6.35268e-16	2.7021e-15	-5.43328e-15	4.50332e-15
		4.17	-8.52234e-15	3.5844e-15	-8.15051e-15	2.77716e-15	-6.32762e-16	3.56394e-15
		4.18	-2.21711e-16	5.57156e-15	-4.99877e-15	3.52618e-16	-1.4329e-14	1.30757e-14
		4.19	-8.71353e-16	2.29959e-15	1.62679e-15	2.2286e-15	-3.39953e-16	5.85497e-15
		4.2	-5.72053e-16	2.23205e-15	1.53716e-15	5.01078e-15	2.53588e-15	9.27774e-16
		4.21	2.83912e-15	3.98581e-15	8.97949e-15	4.59551e-15	-7.54036e-15	7.46997e-15
		4.22	-2.01151e-15	4.81052e-15	2.48754e-15	5.06716e-15	3.07271e-15	4.70241e-15
		4.23	9.66158e-16	3.024e-15	-6.17249e-15	1.16791e-14	-1.04547e-14	9.57581e-15
		4.24	-2.24241e-15	3.48155e-15	-6.10983e-15	4.40584e-15	-3.72449e-15	5.68581e-15
		4.25	-2.17735e-16	3.31054e-15	-3.60499e-16	1.2263e-15	2.8114e-15	1.67889e-15
		4.26	-4.48387e-15	2.40564e-15	2.37848e-15	1.19745e-15	-2.42153e-15	5.02206e-15
		4.27	-1.30761e-15	2.65339e-15	-4.41443e-15	3.26314e-15	-2.0645e-15	4.03013e-15
		4.28	1.0888e-15	2.35068e-15	3.53977e-16	1.46569e-15	-7.49328e-16	4.34469e-15
		4.29	-2.55175e-15	4.63101e-15	-1.27381e-15	2.35531e-15	-2.66663e-15	4.57921e-15
		4.3	-4.71316e-15	1.52799e-15	9.5939e-15	5.66712e-15	3.38824e-15	2.69488e-15
		4.31	-2.28775e-15	2.31003e-15	2.04574e-15	6.92572e-15	-2.15609e-15	5.76251e-15
		4.32	-3.42192e-15	2.91475e-15	1.18683e-14	4.58292e-15	3.45597e-15	1.92232e-15
		4.33	-5.91297e-15	1.82732e-15	-2.7087e-15	7.92286e-15	2.57653e-15	2.30114e-15
		4.34	-3.53844e-15	2.79219e-15	5.73303e-15	3.96837e-15	7.84266e-15	5.94509e-15
		4.35	-8.68002e-16	1.59016e-15	-5.67389e-15	4.78586e-15	-2.61176e-15	5.39847e-15
		4.36	-1.49338e-15	1.68365e-15	-5.95124e-15	1.21048e-14	-4.61288e-15	7.57634e-15
		4.37	-3.6577e-15	1.64101e-15	-5.97055e-15	1.04465e-14	2.1754e-15	3.5491e-15
		4.38	-1.05709e-15	3.38303e-15	-5.276e-16	1.01033e-15	-7.23645e-15	1.17085e-14
		4.39	-7.36734e-15	3.04427e-15	9.01209e-15	5.51165e-15	-2.84974e-15	3.49041e-15
		4.4	-1.24242e-15	2.81252e-15	6.02429e-15	7.1433e-15	1.64653e-15	3.17587e-15
		4.41	-2.23734e-15	3.86168e-15	-8.56104e-15	7.82141e-15	-3.12038e-15	4.52824e-15
		4.42	8.62932e-16	2.79595e-15	-1.56728e-15	7.24544e-15	-5.96791e-15	5.65393e-15
		4.43	8.57557e-16	1.1994e-15	-6.28748e-15	4.82494e-15	4.12732e-15	6.46844e-15
		4.44	-4.28958e-15	3.79168e-15	-2.64797e-15	4.71692e-15	-4.9084e-15	3.28128e-15
		4.45	1.68525e-15	2.56625e-15	1.05023e-14	8.99271e-15	4.61446e-15	4.63347e-15
		4.46	-3.99913e-15	2.70692e-15	-2.40335e-16	1.49621e-15	6.04952e-15	6.28536e-15
		4.47	1.74356e-15	1.49105e-15	1.26101e-15	2.02711e-15	7.22518e-15	4.47278e-15
		4.48	8.03358e-15	3.87455e-15	-1.47903e-15	2.32111e-15	5.98108e-15	1.69627e-15
		4.49	3.9721e-15	3.69132e-15	-9.92421e-15	7.4353e-15	-6.1648e-15	8.05946e-15
		4.5	2.62552e-15	6.56336e-15	-9.01484e-15	3.63605e-15	-5.54393e-15	3.02158e-15
		4.51	1.10846e-15	4.16142e-15	-2.49957e-15	2.84803e-15	-9.87476e-16	3.02087e-15
		4.52	-4.01019e-15	3.0931e-15	5.12417e-15	5.39512e-15	1.93872e-15	3.45464e-15
		4.53	2.10172e-15	1.61995e-15	-9.16443e-15	2.61776e-15	3.74128e-17	2.58407e-15
		4.54	-6.26163e-16	4.76673e-15	-4.91513e-15	3.82345e-15	-2.07019e-15	4.68408e-15
		4.55	1.52264e-15	1.77763e-15	-5.83072e-15	3.97305e-15	-3.21847e-16	1.6769e-15
		4.56	-4.02366e-16	2.90597e-15	-5.32378e-15	4.25024e-15	-1.27521e-16	2.90898e-15
		4.57	-3.15976e-15	3.70459e-15	-8.01307e-15	6.81831e-15	-2.12552e-15	1.9298e-15
		4.58	-7.65389e-16	4.41551e-15	-7.64915e-15	5.52469e-15	-3.03828e-15	2.93967e-15
		4.59	5.50969e-15	1.87596e-15	-4.30456e-15	1.42205e-15	-1.09501e-16	2.0687e-15
		4.6	2.26968e-15	1.61663e-15	-2.23244e-15	9.00992e-15	-6.63306e-15	3.86264e-15
		4.61	1.752e-15	1.69412e-15	8.80752e-16	2.84417e-15	7.62482e-15	7.7628e-15
		4.62	-3.54495e-15	1.87173e-15	-1.60145e-15	2.43932e-15	-9.40477e-16	1.97011e-15
		4.63	-3.29908e-15	2.07924e-15	3.15185e-15	2.59043e-15	4.52159e-15	2.85909e-15
		4.64	2.29615e-15	3.61176e-15	3.46256e-16	4.97835e-15	-3.60234e-15	3.74623e-15
		4.65	-1.30645e-15	3.23737e-15	-8.33716e-16	1.03888e-15	4.25197e-15	6.38882e-15
		4.66	-2.70955e-15	2.98718e-15	4.82223e-15	5.04494e-15	1.42697e-15	3.21387e-15
		4.67	1.55537e-15	1.36767e-15	1.25853e-15	3.94734e-15	-4.88172e-15	2.49237e-15
		4.68	3.30681e-15	2.3713e-15	-4.91796e-15	2.2064e-15	2.58002e-15	4.64498e-15
		4.69	-3.07009e-15	5.25405e-15	3.29778e-15	5.22098e-15	-4.99631e-16	2.23384e-15
		4.7	1.97007e-16	4.89596e-15	-3.70008e-15	5.22327e-15	5.37448e-16	2.51576e-15
		4.71	2.82721e-15	3.17065e-15	4.9647e-15	5.30453e-15	-1.11035e-14	8.05674e-15
		4.72	3.21983e-15	2.68346e-15	-2.85808e-15	9.40104e-16	5.84123e-15	3.22646e-15
		4.73	7.62144e-15	1.46957e-15	3.13308e-15	5.11798e-15	5.8188e-15	8.15756e-15
		4.74	5.89824e-15	3.01332e-15	9.75443e-16	4.45951e-15	4.36907e-15	5.25896e-15
		4.75	8.41533e-15	3.20183e-15	5.36654e-15	5.38703e-15	1.09797e-15	3.78829e-15
		4.76	6.27483e-15	2.89315e-15	8.65954e-15	5.54667e-15	8.72931e-15	5.20419e-15
		4.77	2.78458e-15	2.57946e-15	-6.94263e-15	4.98083e-15	5.28879e-15	4.49625e-15
		4.78	3.04823e-15	2.50039e-15	-2.84062e-15	5.9941e-15	3.55575e-15	3.12453e-15
		4.79	4.66457e-15	3.63827e-15	1.83121e-15	5.79499e-15	-1.97943e-15	3.43281e-15
		4.8	4.3794e-15	3.14429e-15	-1.07211e-15	6.21644e-15	2.80533e-15	4.48583e-15
		4.81	5.86572e-15	3.41663e-15	9.43826e-16	3.70243e-15	-2.00049e-15	3.3966e-15
		4.82	5.22187e-15	4.00553e-15	-9.94693e-16	1.62914e-15	-1.37718e-15	4.44483e-15
		4.83	-3.69759e-15	2.87483e-15	2.95326e-15	5.02009e-15	6.51315e-15	7.24139e-15
		4.84	-6.6758e-16	2.00596e-15	5.75142e-15	5.27115e-15	2.79243e-16	1.97498e-15
		4.85	-4.83791e-15	4.02461e-15	1.27805e-15	4.19806e-15	8.2571e-15	8.00482e-15
		4.86	-2.19609e-15	2.89817e-15	5.08981e-15	4.88944e-15	-2.1873e-15	3.42221e-15
		4.87	-4.26059e-15	2.4571e-15	5.86017e-15	3.56547e-15	4.92213e-15	5.78555e-15
		4.88	-2.94586e-15	2.34183e-15	3.32452e-15	2.37474e-15	2.27189e-15	6.55234e-15
		4.89	-2.0854e-15	2.24506e-15	5.42134e-15	3.48638e-15	3.12146e-15	7.63367e-15
		4.9	2.42739e-15	1.63792e-15	4.65239e-15	2.3476e-15	-6.68443e-16	6.52134e-15
		4.91	-1.35809e-15	1.5286e-15	-2.80815e-15	1.24143e-14	1.95149e-15	6.12618e-15
		4.92	-1.01861e-15	2.94177e-15	8.71e-15	4.31616e-15	-1.87603e-16	4.74706e-15
		4.93	-1.93923e-15	2.867e-15	4.24887e-15	3.27061e-15	4.18102e-15	9.38619e-15
		4.94	5.56576e-15	2.69375e-15	4.18957e-15	2.98507e-15	3.54489e-16	8.33008e-15
		4.95	2.28542e-15	2.35964e-15	7.46219e-15	6.83085e-15	4.1241e-15	1.01298e-14
		4.96	2.98277e-16	4.35097e-15	-8.10219e-16	3.39659e-15	6.74676e-16	6.50101e-15
		4.97	1.85208e-15	4.67613e-15	9.95218e-16	3.51041e-15	-1.33588e-15	6.30021e-15
		4.98	-1.70859e-16	5.07503e-15	-1.42261e-15	7.73028e-15	4.49755e-15	7.32547e-15
		4.99	-1.70205e-15	2.30309e-15	4.83303e-15	5.63229e-15	4.8501e-15	8.46854e-15
		5	9.51503e-17	2.34014e-15	1.26489e-14	1.07466e-14	4.68309e-17	5.685e-15
		5.01	-1.98193e-15	2.90553e-15	3.44808e-15	4.45459e-15	1.03122e-14	1.18823e-14
		5.02	3.56651e-15	2.5122e-15	2.62368e-15	5.82353e-15	7.41413e-15	1.01346e-14
		5.03	1.54017e-15	2.42922e-15	1.00164e-14	7.38649e-15	5.34216e-15	7.26422e-15
		5.04	3.59912e-15	1.87451e-15	1.06629e-14	7.08559e-15	4.55406e-15	6.24048e-15
		5.05	2.65286e-16	1.71233e-15	-9.77164e-16	2.35563e-15	8.33168e-15	1.24795e-14
		5.06	2.88103e-15	1.95272e-15	-2.8538e-15	3.45152e-15	6.98825e-15	9.46961e-15
		5.07	1.00804e-16	3.33952e-15	2.87289e-15	8.8749e-15	1.30192e-14	9.17693e-15
		5.08	2.07353e-15	2.96266e-15	-3.6206e-15	7.87302e-15	4.95234e-15	3.58936e-15
		5.09	1.82791e-15	3.88254e-15	8.80186e-16	1.32311e-15	-1.27315e-16	6.98354e-15
		5.1	2.19251e-15	2.50668e-15	1.12837e-14	7.37592e-15	1.42338e-15	7.30657e-15
		5.11	-6.10648e-16	3.44194e-15	7.6929e-15	7.58749e-15	1.7784e-15	8.23947e-15
		5.12	3.11362e-15	3.2983e-15	9.39172e-15	5.29862e-15	5.32675e-15	4.94858e-15
		5.13	1.00977e-15	3.52336e-15	-4.25487e-15	1.13885e-14	-5.7689e-15	3.90586e-15
		5.14	1.01242e-15	4.95671e-15	4.25368e-15	5.87966e-15	-6.04348e-16	6.74536e-15
		5.15	2.84667e-15	2.64728e-15	7.41126e-15	5.49546e-15	1.2024e-15	4.79241e-15
		5.16	4.40169e-16	1.81869e-15	1.27773e-14	6.83422e-15	-7.11501e-15	6.60654e-15
		5.17	-1.22373e-15	2.16196e-15	6.58279e-15	6.24936e-15	-8.43229e-16	5.46497e-15
		5.18	-1.85429e-15	3.53352e-15	-4.90453e-16	5.79914e-15	1.57862e-15	8.27479e-15
		5.19	-9.04789e-16	3.06667e-15	3.2585e-15	7.26535e-15	5.6801e-15	1.09467e-14
		5.2	8.76601e-16	3.1391e-15	-9.62651e-15	1.12876e-14	1.78773e-15	6.58877e-15
		5.21	-1.35691e-15	3.41351e-15	4.05711e-15	3.97178e-15	-1.06105e-15	6.2969e-15
		5.22	-4.47864e-15	3.50122e-15	-3.06546e-15	6.90091e-15	-3.29196e-16	6.50335e-15
		5.23	1.01987e-15	1.98416e-15	6.31474e-15	8.63561e-15	7.06674e-15	5.90172e-15
		5.24	1.17377e-16	2.47032e-15	9.5648e-15	6.11036e-15	3.29516e-15	7.24342e-15
		5.25	-6.64145e-16	1.47447e-15	1.07072e-14	3.71371e-15	9.80363e-16	7.70561e-15
		5.26	-3.49885e-15	3.02678e-15	7.13139e-15	4.94737e-15	2.7059e-15	8.92733e-15
		5.27	1.85508e-16	1.87348e-15	1.2846e-14	1.12927e-14	4.67965e-16	7.045e-15
		5.28	-4.95067e-15	4.38749e-15	1.09354e-14	6.06454e-15	9.33728e-16	6.98001e-15
		5.29	-2.58592e-15	3.77775e-15	5.10287e-15	3.89477e-15	5.69611e-15	4.77068e-15
		5.3	-5.60043e-15	2.79454e-15	-6.79455e-15	1.1125e-14	3.44735e-16	5.84773e-15
		5.31	-6.0316e-15	2.81492e-15	1.50891e-14	5.90254e-15	1.78587e-15	5.56204e-15
		5.32	4.32198e-15	6.19317e-15	1.32671e-14	8.03995e-15	1.89817e-15	5.05235e-15
		5.33	-2.11339e-15	5.09979e-15	1.3497e-14	9.81391e-15	-3.61409e-15	7.94289e-15
		5.34	8.93484e-16	5.73149e-15	2.68592e-15	6.29825e-15	-2.78465e-15	6.56043e-15
		5.35	-1.72691e-15	1.64701e-15	9.24691e-15	5.16308e-15	4.78295e-15	9.47403e-15
		5.36	-1.68721e-16	4.87084e-15	-8.46865e-16	1.01589e-14	5.5327e-15	7.08222e-15
		5.37	-4.41488e-15	2.42723e-15	8.31182e-16	2.70684e-15	1.25924e-15	7.30294e-15
		5.38	-9.90069e-16	2.24727e-15	5.65327e-15	6.15823e-15	2.92458e-15	6.57595e-15
		5.39	-4.22778e-15	1.66944e-15	1.65126e-15	3.14128e-15	-1.57312e-15	6.54273e-15
		5.4	-8.45486e-16	3.37729e-15	-8.51641e-16	4.23942e-15	9.28158e-15	7.12395e-15
		5.41	-5.49699e-15	4.05707e-15	3.41337e-15	3.51657e-15	1.4976e-15	6.04543e-15
		5.42	1.35851e-15	3.11265e-15	6.31625e-15	4.81468e-15	3.1751e-15	7.76487e-15
		5.43	1.27276e-15	2.49717e-15	-7.10153e-16	2.77128e-15	3.5147e-15	8.60112e-15
		5.44	7.38092e-15	2.93908e-15	3.55276e-15	5.04178e-15	7.1357e-15	1.10853e-14
		5.45	-8.83367e-16	3.26958e-15	3.67787e-15	3.42771e-15	5.84401e-15	5.73063e-15
		5.46	4.1744e-16	3.16691e-15	6.37553e-15	4.11733e-15	9.12262e-16	7.55296e-15
		5.47	1.16982e-15	3.01928e-15	2.27633e-15	5.10047e-15	4.05226e-15	5.65795e-15
		5.48	5.17614e-15	1.54994e-15	6.55372e-17	2.24088e-15	6.69586e-16	7.38709e-15
		5.49	-2.6974e-16	3.85836e-15	5.74485e-15	4.19e-15	1.58936e-15	6.44035e-15
		5.5	-2.09865e-15	2.80375e-15	-1.41896e-15	2.65211e-15	-8.30481e-15	7.7633e-15
		5.51	6.88542e-16	3.91282e-15	3.04609e-15	4.01048e-15	-7.45815e-15	1.1213e-14
		5.52	1.65188e-15	2.54662e-15	5.86303e-15	5.57156e-15	2.66358e-15	6.60906e-15
		5.53	2.80167e-15	1.59316e-15	5.32064e-15	4.85711e-15	5.73844e-15	4.29536e-15
		5.54	-9.10077e-17	5.04589e-15	-3.44359e-15	1.95087e-15	5.45078e-15	5.48388e-15
		5.55	2.79051e-15	4.04454e-15	-4.82022e-15	6.2877e-15	2.54209e-15	5.79017e-15
		5.56	1.57125e-15	3.52293e-15	1.07115e-14	6.71616e-15	-3.36516e-15	6.25908e-15
		5.57	-5.13739e-16	3.26912e-15	3.51298e-15	6.27303e-15	1.99005e-15	3.69634e-15
		5.58	-4.31337e-16	3.7971e-15	2.33067e-15	5.05663e-15	7.54341e-15	4.7494e-15
		5.59	1.49793e-15	3.79986e-15	4.90616e-15	3.89317e-15	4.62989e-15	6.0108e-15
		5.6	5.0701e-15	4.48644e-15	2.96465e-15	7.72298e-15	3.28842e-15	5.60684e-15
		5.61	2.37126e-16	5.20698e-15	6.53092e-15	5.57161e-15	8.52857e-15	6.60545e-15
		5.62	-5.43602e-15	3.52193e-15	4.64504e-15	3.37465e-15	1.77603e-14	7.80759e-15
		5.63	-3.58384e-15	2.97405e-15	2.55352e-15	6.21093e-15	6.78546e-15	1.4603e-15
		5.64	-4.43367e-15	3.58517e-15	6.47093e-15	9.31855e-15	5.35727e-15	7.54278e-15
		5.65	-4.7348e-15	3.1667e-15	2.60947e-15	3.66692e-15	3.15989e-15	5.08628e-15
		5.66	-1.15426e-16	3.16568e-15	-9.35467e-16	4.48736e-15	6.71667e-15	4.14971e-15
		5.67	-8.14781e-15	2.79721e-15	6.52579e-15	4.01468e-15	9.82674e-15	3.59229e-15
		5.68	3.16977e-15	3.93015e-15	1.42987e-14	1.20647e-14	1.21698e-14	4.48795e-15
		5.69	-1.9391e-15	4.32699e-15	-4.15511e-15	5.88459e-15	3.67182e-15	5.95606e-15
		5.7	-6.06549e-15	4.61756e-15	1.59349e-14	1.20315e-14	1.297e-14	7.07113e-15
		5.71	-7.17177e-15	5.60202e-15	6.68899e-15	5.72911e-15	1.01871e-14	4.84868e-15
		5.72	-7.21297e-15	5.25595e-15	6.06103e-15	6.3048e-15	9.88314e-15	4.61969e-15
		5.73	-6.47771e-15	3.85074e-15	3.55656e-15	2.16849e-15	6.70801e-15	3.84485e-15
		5.74	-3.33526e-15	4.4841e-15	2.65663e-15	5.1067e-15	-3.27652e-15	8.98502e-15
		5.75	-2.46532e-15	4.02937e-15	-5.84397e-16	2.22648e-15	2.93077e-15	4.19676e-15
		5.76	1.23763e-15	4.29649e-15	4.72641e-15	4.97413e-15	7.21255e-15	6.88923e-15
		5.77	-5.04208e-16	2.64935e-15	4.90436e-15	6.79291e-15	4.5655e-15	4.32346e-15
		5.78	-4.11709e-16	5.54898e-15	2.51333e-15	5.57027e-15	9.67803e-15	4.12577e-15
		5.79	-2.35786e-15	2.77133e-15	5.44389e-15	3.75169e-15	5.31067e-15	6.199e-15
		5.8	2.32297e-15	4.71805e-15	4.13133e-15	2.28161e-15	3.33833e-15	6.91356e-15
		5.81	-7.87734e-17	5.48551e-15	5.95742e-15	5.75221e-15	2.45426e-15	6.09839e-15
		5.82	6.19305e-15	3.52715e-15	-6.88867e-15	1.03003e-14	2.16596e-15	7.00981e-15
		5.83	4.57951e-15	4.58274e-15	2.91847e-15	5.80436e-15	9.87319e-15	4.01509e-15
		5.84	2.10776e-15	3.25873e-15	-4.96624e-16	2.30895e-15	5.70902e-15	6.49362e-15
		5.85	1.00331e-15	3.83586e-15	-1.68695e-15	2.10527e-15	1.23278e-14	4.01783e-15
		5.86	1.98764e-15	4.45569e-15	7.71444e-16	2.90818e-15	9.86551e-15	3.99415e-15
		5.87	-4.80246e-15	5.26175e-15	-2.66765e-15	2.67939e-15	1.70625e-14	9.72064e-15
		5.88	2.27716e-15	2.13141e-15	4.02293e-15	4.10634e-15	8.93361e-15	4.57889e-15
		5.89	-5.51659e-15	2.92214e-15	-2.53606e-15	5.31496e-15	1.35421e-14	5.65425e-15
		5.9	-1.43896e-15	3.64287e-15	9.82727e-15	9.39429e-15	1.39174e-14	8.69818e-15
		5.91	-1.16226e-15	2.09034e-15	3.35172e-15	4.61979e-15	1.21074e-14	8.26858e-15
		5.92	-3.6173e-15	5.48569e-15	-5.14426e-15	3.12722e-15	8.84838e-15	5.96163e-15
		5.93	-2.1949e-15	4.07344e-15	1.38996e-15	5.28526e-15	1.02838e-14	4.24238e-15
		5.94	-5.56679e-15	2.59874e-15	1.77817e-15	1.08929e-14	8.27692e-15	4.47156e-15
		5.95	-4.0456e-15	4.4101e-15	1.78387e-15	7.05055e-15	1.20575e-14	5.70491e-15
		5.96	1.84195e-15	4.06918e-15	6.0954e-15	6.77261e-15	6.45558e-15	7.51823e-15
		5.97	-1.21385e-15	3.90368e-15	2.37071e-16	3.24765e-15	1.20282e-14	8.38614e-15
		5.98	-6.50616e-16	1.63885e-15	3.81465e-15	7.9035e-15	1.07006e-14	6.28173e-15
		5.99	3.9212e-15	2.62136e-15	5.84216e-15	3.60455e-15	6.05656e-15	7.02342e-15
		6	-2.15864e-15	3.11725e-15	6.85819e-15	4.29617e-15	3.67049e-15	5.6735e-15
		6.01	-2.44812e-16	2.34036e-15	-6.33195e-16	5.10939e-15	1.18517e-14	6.97804e-15
		6.02	-4.88049e-15	4.00116e-15	-2.91366e-15	7.54476e-15	6.71938e-15	6.71059e-15
		6.03	-7.8911e-15	6.81941e-15	1.15147e-14	1.23135e-14	5.32521e-15	8.28873e-15
		6.04	-6.57735e-15	4.48992e-15	-4.89736e-15	5.61177e-15	8.71832e-15	8.15212e-15
		6.05	-9.61059e-16	2.71439e-15	7.3947e-15	8.01792e-15	6.1864e-15	7.43541e-15
		6.06	-2.61575e-15	2.30556e-15	-1.9312e-15	3.15655e-15	1.12455e-14	5.44402e-15
		6.07	1.0147e-15	4.09322e-15	-1.68703e-15	6.59163e-15	6.24137e-15	7.05738e-15
		6.08	-1.74084e-15	3.44664e-15	3.99086e-16	5.02337e-15	6.97453e-15	7.65694e-15
		6.09	-1.13454e-15	2.26718e-15	9.19565e-15	1.00415e-14	6.65574e-15	6.16124e-15
		6.1	-1.28648e-15	2.71113e-15	1.14884e-15	4.96859e-15	4.05778e-15	5.18122e-15
		6.11	-4.54061e-15	4.77937e-15	1.01503e-14	1.15709e-14	6.47068e-16	7.051e-15
		6.12	-4.18259e-15	2.48053e-15	1.67225e-15	8.43597e-15	2.97783e-15	4.99991e-15
		6.13	-4.51028e-15	3.45918e-15	5.08015e-15	8.64456e-15	-1.43481e-15	4.57503e-15
		6.14	7.70434e-16	2.27037e-15	2.91444e-15	9.20529e-15	1.4269e-15	9.68048e-15
		6.15	-1.03722e-15	2.11063e-15	6.38093e-16	4.89388e-15	-5.22146e-15	1.05089e-14
		6.16	-4.53404e-15	2.68845e-15	1.48841e-15	1.17852e-14	4.15021e-15	4.98573e-15
		6.17	2.02821e-15	3.37307e-15	6.17106e-15	5.08676e-15	-8.31665e-16	8.63907e-15
		6.18	-3.67127e-15	3.42545e-15	1.58102e-15	6.8046e-15	-3.18089e-15	6.89066e-15
		6.19	3.51227e-17	2.33529e-15	6.45226e-16	4.13539e-15	-1.05952e-15	9.6317e-15
		6.2	-4.02332e-15	4.49695e-15	3.05592e-15	6.64569e-15	2.84119e-16	8.7216e-15
		6.21	1.18445e-15	4.66676e-15	-5.58511e-16	5.25836e-15	3.91257e-15	6.95295e-15
		6.22	-2.37002e-15	3.72052e-15	4.57333e-15	8.87613e-15	-2.20014e-15	7.98178e-15
		6.23	-1.5962e-15	2.47714e-15	-6.33938e-15	6.44907e-15	8.08477e-15	6.01738e-15
		6.24	-1.04729e-15	2.9586e-15	3.13171e-16	6.74945e-15	1.56882e-15	6.78547e-15
		6.25	-1.808e-15	4.25483e-15	3.09413e-15	1.1381e-14	-6.64973e-16	5.57075e-15
		6.26	-2.52711e-15	4.12772e-15	-1.87412e-16	9.877e-15	1.11989e-14	4.8704e-15
		6.27	-1.4684e-15	3.9226e-15	-2.88421e-15	7.14808e-15	3.047e-15	6.50117e-15
		6.28	-2.81468e-15	3.57225e-15	-2.1377e-15	8.06764e-15	8.76652e-15	7.19927e-15
		6.29	-7.45386e-15	2.45448e-15	-2.55917e-15	5.02785e-15	6.93481e-15	5.67284e-15
		6.3	-2.6064e-15	3.45133e-15	-3.01201e-15	5.37604e-15	1.74124e-15	1.05855e-14
		6.31	-1.24877e-16	2.15099e-15	1.39128e-15	4.6349e-15	-3.2975e-16	1.05884e-14
		6.32	-3.74994e-15	4.29888e-15	1.74195e-15	3.79723e-15	-8.16877e-16	8.99331e-15
		6.33	-2.97373e-15	4.9683e-15	5.8827e-16	5.20012e-15	3.8205e-15	6.39276e-15
		6.34	-5.50425e-15	3.32637e-15	6.04935e-15	6.16804e-15	1.09441e-14	5.55895e-15
		6.35	-4.1843e-15	3.75176e-15	-2.38448e-15	6.11547e-15	-2.60751e-15	1.14318e-14
		6.36	-4.96599e-15	4.66873e-15	8.28523e-15	1.25578e-14	6.02828e-15	5.81411e-15
		6.37	-5.44939e-15	3.07905e-15	-1.95888e-16	1.16133e-14	8.25484e-15	5.52544e-15
		6.38	-2.55285e-16	4.00819e-15	-7.18368e-15	3.62643e-15	-3.36385e-15	1.32295e-14
		6.39	-9.93261e-15	2.14184e-15	1.74796e-15	7.61491e-15	-3.18455e-15	1.31289e-14
		6.4	-8.3733e-16	1.441e-15	-2.46779e-15	6.72951e-15	7.18528e-15	4.05997e-15
		6.41	1.06525e-14	5.14142e-15	-1.50436e-15	1.11452e-14	1.29264e-14	4.85213e-15
		6.42	-1.3411e-15	3.3948e-15	-4.3548e-15	5.73287e-15	6.76011e-15	3.68758e-15
		6.43	5.1445e-15	4.63249e-15	7.5441e-16	9.35484e-15	8.40075e-15	4.5586e-15
		6.44	-8.02077e-16	3.07165e-15	-2.71305e-15	5.88408e-15	1.09511e-14	5.19859e-15
		6.45	-3.54563e-15	3.19551e-15	-4.28319e-16	6.68953e-15	8.66003e-15	2.67178e-15
		6.46	-1.19356e-15	4.07857e-15	-3.14894e-15	4.93714e-15	3.93169e-15	4.12736e-15
		6.47	-5.23569e-16	2.54883e-15	8.17792e-16	9.71071e-15	6.07322e-16	6.37819e-15
		6.48	-9.68209e-16	3.61291e-15	-4.05122e-15	6.35432e-15	5.88684e-15	4.88206e-15
		6.49	1.82933e-15	1.72225e-15	-3.14407e-15	7.62683e-15	4.08743e-16	9.58773e-15
		6.5	2.43597e-16	1.75094e-15	-7.71406e-15	7.11001e-15	2.30403e-15	7.071e-15
		6.51	-3.55494e-15	5.65701e-15	-1.33756e-15	6.50096e-15	6.25614e-15	5.516e-15
		6.52	-2.85785e-15	3.29523e-15	6.80723e-15	1.73418e-14	1.15754e-14	5.47029e-15
		6.53	1.11616e-15	3.90025e-15	-1.54471e-15	1.28906e-14	7.66166e-15	4.3304e-15
		6.54	-3.09014e-15	5.43127e-15	-9.52199e-15	6.79329e-15	6.28185e-15	4.97094e-15
		6.55	1.24012e-15	2.19581e-15	-1.93651e-15	1.10535e-14	7.20563e-15	5.66308e-15
		6.56	-3.30033e-15	3.10256e-15	-9.334e-15	1.16865e-14	6.20228e-15	5.79735e-15
		6.57	-6.70336e-15	5.12196e-15	-1.41424e-15	1.27943e-14	2.47985e-16	6.59903e-15
		6.58	-3.21162e-15	2.75249e-15	-1.62004e-16	1.1385e-14	1.18497e-14	3.17136e-15
		6.59	-9.42103e-15	5.93197e-15	-3.5537e-15	8.13483e-15	5.71727e-15	5.40975e-15
		6.6	-7.67288e-15	4.38807e-15	-3.14899e-15	6.79746e-15	1.82112e-15	6.85168e-15
		6.61	-7.15805e-15	4.55816e-15	3.75983e-15	1.48564e-14	9.56361e-15	5.88037e-15
		6.62	-4.92432e-15	3.00581e-15	7.91136e-15	7.94599e-15	3.90591e-15	4.81437e-15
		6.63	-4.25188e-15	5.42736e-15	6.22258e-15	1.98179e-14	5.2587e-15	5.09378e-15
		6.64	-5.02289e-15	2.48841e-15	5.06932e-16	7.2898e-15	6.88152e-15	4.79785e-15
		6.65	-7.22797e-15	4.66085e-15	-8.70998e-15	7.76751e-15	1.05174e-14	4.26779e-15
		6.66	-5.29243e-15	3.73242e-15	-1.49975e-15	5.49496e-15	9.8434e-15	4.20216e-15
		6.67	-4.13042e-15	1.96845e-15	1.23704e-14	1.4777e-14	1.0812e-14	2.88814e-15
		6.68	-3.59428e-15	4.71341e-15	3.17136e-15	1.29531e-14	6.17517e-15	5.25451e-15
		6.69	-3.53313e-15	3.05348e-15	-5.10124e-15	7.91785e-15	9.29792e-15	4.39837e-15
		6.7	-7.03726e-15	5.19133e-15	-7.38085e-15	1.13566e-14	7.54407e-15	4.97383e-15
		6.71	-5.1222e-15	7.82588e-15	2.3334e-15	1.25102e-14	1.28093e-14	6.0286e-15
		6.72	-2.20751e-15	4.28307e-15	5.10313e-15	1.48174e-14	5.97853e-15	4.71224e-15
		6.73	-2.87958e-15	4.04412e-15	6.47297e-16	1.16572e-14	9.01582e-15	5.9071e-15
		6.74	-5.14548e-15	4.79216e-15	-2.24275e-17	9.2805e-15	8.25481e-15	3.29168e-15
		6.75	-1.54344e-15	2.1549e-15	-2.35082e-15	1.05554e-14	7.16839e-15	6.70067e-15
		6.76	-1.83383e-15	4.40991e-15	5.63877e-15	1.34612e-14	1.58912e-15	5.55415e-15
		6.77	-2.58341e-15	4.99325e-15	-4.82533e-15	9.2505e-15	3.10551e-16	9.11738e-15
		6.78	3.8309e-15	2.3078e-15	1.76991e-15	7.46605e-15	6.21643e-15	6.08821e-15
		6.79	-6.31233e-15	5.32622e-15	4.76499e-15	1.36318e-14	2.45083e-15	6.64365e-15
		6.8	-3.38258e-15	3.0626e-15	1.29118e-14	1.64599e-14	1.82896e-14	9.9e-15
		6.81	-8.48196e-15	6.90849e-15	2.34906e-15	9.8287e-15	5.84621e-15	4.49562e-15
		6.82	-8.97757e-15	5.01396e-15	6.40799e-15	6.66596e-15	3.80799e-15	4.85284e-15
		6.83	-7.35097e-15	5.81852e-15	2.80601e-15	1.20522e-14	2.36006e-15	4.57198e-15
		6.84	-7.91643e-15	4.73717e-15	5.10065e-15	1.63537e-14	-8.27389e-16	7.01803e-15
		6.85	-8.7771e-15	5.18708e-15	3.85209e-15	1.04461e-14	1.69528e-15	9.17057e-15
		6.86	-6.39556e-15	4.98293e-15	9.73229e-15	1.32026e-14	7.83319e-15	4.39725e-15
		6.87	-2.11648e-15	5.03307e-15	-1.31519e-15	9.35859e-15	5.54237e-16	1.18287e-14
		6.88	-2.40002e-15	5.06287e-15	2.22846e-15	1.11751e-14	6.83706e-16	1.30272e-14
		6.89	-6.21377e-15	4.89413e-15	2.22958e-15	5.7774e-15	4.3493e-15	5.55146e-15
		6.9	-2.89993e-15	2.88908e-15	4.93047e-15	9.30779e-15	3.55073e-15	6.83068e-15
		6.91	-4.52327e-15	7.98069e-15	-9.01022e-16	4.32201e-15	3.28224e-15	3.00504e-15
		6.92	-5.75295e-15	3.26226e-15	3.91282e-15	1.3144e-14	6.95473e-15	5.49435e-15
		6.93	-4.04358e-15	6.75161e-15	8.56838e-16	7.40123e-15	2.99684e-15	4.86772e-15
		6.94	-8.35501e-15	6.69631e-15	1.36459e-15	4.69543e-15	8.35231e-15	4.77392e-15
		6.95	-3.84612e-15	8.10066e-15	6.55265e-16	8.08479e-15	1.09209e-14	3.82869e-15
		6.96	-1.58678e-15	6.35907e-15	6.3818e-15	6.37422e-15	5.01875e-15	4.16776e-15
		6.97	-2.3983e-15	5.80057e-15	2.74803e-15	1.16952e-14	7.4314e-15	4.58615e-15
		6.98	-5.4075e-15	7.66474e-15	3.0966e-15	1.02668e-14	-9.03619e-15	1.46535e-14
		6.99	-8.68063e-15	5.56757e-15	3.17396e-15	8.48098e-15	1.2391e-15	4.45443e-15
		7	-1.08711e-14	5.95488e-15	-7.1342e-15	7.76743e-15	8.66329e-15	6.20632e-15
		7.01	-9.71869e-15	3.52257e-15	-5.13248e-15	5.49862e-15	7.02287e-15	6.07725e-15
		7.02	-1.06153e-14	6.99789e-15	5.43176e-15	9.44385e-15	-1.4301e-15	6.36579e-15
		7.03	-7.68808e-15	3.54432e-15	6.84847e-15	1.0442e-14	2.679e-16	4.88075e-15
		7.04	-4.00212e-15	4.87811e-15	-2.43331e-15	8.75119e-15	6.90944e-16	6.83264e-15
		7.05	-4.13318e-15	4.32068e-15	3.44352e-15	4.32436e-15	2.86248e-15	5.84749e-15
		7.06	-7.17327e-15	4.07348e-15	-6.72891e-15	7.54473e-15	5.90557e-15	4.55456e-15
		7.07	-1.76601e-15	5.63192e-15	6.54527e-15	1.32143e-14	-5.09528e-16	6.06386e-15
		7.08	-6.51554e-15	6.68946e-15	-9.39713e-16	7.13466e-15	-4.65217e-15	9.43419e-15
		7.09	-2.34842e-15	4.43923e-15	5.90739e-15	1.24069e-14	-8.92642e-15	1.02947e-14
		7.1	-6.37817e-15	5.16254e-15	6.11981e-15	1.23872e-14	-1.0235e-14	1.50979e-14
		7.11	-7.57317e-15	3.54919e-15	-7.04305e-16	1.01307e-14	-7.08023e-15	1.09605e-14
		7.12	-4.23196e-15	3.98501e-15	-2.02333e-16	8.77496e-15	5.52729e-15	3.78514e-15
		7.13	-8.35551e-15	4.53562e-15	2.52637e-15	9.2964e-15	6.47662e-16	7.44634e-15
		7.14	-2.49167e-15	3.137e-15	-6.07932e-15	4.63837e-15	3.67964e-15	7.57009e-15
		7.15	-8.59488e-16	6.46605e-15	1.87501e-15	4.01578e-15	-1.8693e-15	4.30303e-15
		7.16	-4.67179e-15	4.76863e-15	4.23374e-15	1.06418e-14	-4.23837e-15	4.88513e-15
		7.17	-5.16883e-15	4.582e-15	5.77017e-15	9.21152e-15	-4.82712e-15	7.72939e-15
		7.18	-4.60765e-15	1.47419e-15	1.08401e-14	1.10327e-14	-1.95372e-15	9.07453e-15
		7.19	-9.31505e-15	4.96823e-15	4.26106e-15	1.16748e-14	-4.62536e-15	7.39872e-15
		7.2	-6.90115e-16	1.95044e-15	6.12038e-15	1.31954e-14	-2.81887e-15	9.87155e-15
		7.21	6.37901e-16	3.09212e-15	1.12412e-14	1.05365e-14	2.73357e-15	4.04107e-15
		7.22	-3.7951e-15	3.06803e-15	4.96215e-15	9.94729e-15	1.1552e-15	7.88834e-15
		7.23	-4.98626e-15	2.38731e-15	1.1353e-14	1.58026e-14	1.86383e-15	5.76605e-15
		7.24	-4.34085e-15	3.84074e-15	4.95411e-15	1.38732e-14	2.40861e-16	4.53445e-15
		7.25	-3.05407e-15	2.01982e-15	-1.06804e-15	4.57289e-15	-7.35424e-15	7.46041e-15
		7.26	-3.74996e-16	2.80204e-15	4.98199e-15	3.03261e-15	-2.05337e-16	6.23646e-15
		7.27	-7.35687e-15	3.83416e-15	-1.1689e-15	6.69161e-15	-2.8749e-15	7.71448e-15
		7.28	-7.60822e-15	3.65276e-15	1.64327e-15	5.23783e-15	-3.22313e-15	5.91324e-15
		7.29	-1.87543e-15	2.50324e-15	2.38086e-15	5.63587e-15	2.10288e-15	4.91289e-15
		7.3	-1.31787e-15	3.36816e-15	2.64754e-15	7.70332e-15	-1.76488e-15	4.67374e-15
		7.31	-8.30762e-15	4.4822e-15	-1.89092e-17	5.21177e-15	4.98541e-15	2.59953e-15
		7.32	-4.98924e-15	3.97812e-15	1.26726e-14	1.52746e-14	-4.3779e-16	4.95894e-15
		7.33	-3.33614e-15	5.58552e-15	6.29039e-15	1.1768e-14	2.83413e-15	4.07203e-15
		7.34	-4.73778e-15	4.15646e-15	6.52386e-15	1.10395e-14	-3.48013e-15	2.11875e-15
		7.35	-2.46663e-15	4.61221e-15	5.27356e-15	5.44572e-15	-4.09446e-15	3.83468e-15
		7.36	-6.99338e-17	3.32707e-15	-1.96692e-15	6.38876e-15	-1.86772e-15	3.43533e-15
		7.37	3.30357e-15	3.22244e-15	1.74524e-15	1.11764e-14	-1.70347e-15	8.04785e-15
		7.38	2.06851e-15	4.23427e-15	9.41097e-15	6.54979e-15	-2.6604e-15	5.8034e-15
		7.39	-1.26822e-15	4.01076e-15	7.0567e-15	7.79707e-15	1.37478e-15	4.32374e-15
		7.4	-1.92931e-15	7.07054e-15	1.7355e-15	6.07106e-15	-2.02181e-15	4.24219e-15
		7.41	1.5899e-15	6.02657e-15	4.77684e-15	8.904e-15	-3.44388e-15	3.45261e-15
		7.42	-2.61557e-15	3.90606e-15	1.64285e-15	3.49545e-15	-1.13595e-15	3.47538e-15
		7.43	9.90007e-16	4.10115e-15	1.02159e-14	7.18033e-15	-7.08766e-15	6.44515e-15
		7.44	-4.23297e-15	3.91926e-15	4.43756e-15	3.79092e-15	-5.12894e-15	8.76879e-15
		7.45	8.52983e-16	3.99253e-15	-5.14013e-16	6.32262e-15	-8.75334e-16	3.9186e-15
		7.46	-8.18613e-15	4.43655e-15	5.37115e-16	2.46334e-15	-7.2004e-15	6.83166e-15
		7.47	-6.00032e-15	6.01865e-15	4.53254e-15	4.28302e-15	-6.01537e-15	9.45246e-15
		7.48	-5.24596e-15	4.61489e-15	1.36775e-14	9.82902e-15	-1.01316e-14	1.06162e-14
		7.49	-2.96868e-15	2.6384e-15	9.74906e-15	6.95358e-15	-1.01727e-14	1.01863e-14
		7.5	-3.53873e-15	3.40103e-15	2.73515e-15	5.38892e-15	-1.63335e-15	4.92027e-15
		7.51	-7.62035e-15	3.24629e-15	5.8182e-15	5.07436e-15	-4.58703e-15	6.11626e-15
		7.52	-6.54798e-15	2.30452e-15	7.24705e-15	5.48988e-15	-6.31225e-15	1.06103e-14
		7.53	-2.96484e-15	4.44072e-15	4.1444e-15	8.01747e-15	-6.68578e-16	5.12965e-15
		7.54	-5.60359e-15	2.11307e-15	1.9499e-15	6.69602e-15	-7.84889e-15	1.15236e-14
		7.55	-4.48367e-15	3.29108e-15	8.33294e-15	8.99028e-15	-3.87323e-15	8.47862e-15
		7.56	-8.80379e-15	2.55881e-15	-1.79823e-15	4.4644e-15	-4.22656e-15	7.53197e-15
		7.57	-6.35304e-15	4.01556e-15	8.36673e-15	2.92348e-15	-6.96932e-15	8.04181e-15
		7.58	-6.45999e-15	4.46613e-15	5.78558e-15	3.34234e-15	2.23401e-16	4.32239e-15
		7.59	-5.2306e-15	4.16215e-15	1.06692e-14	1.33485e-14	-3.95759e-15	7.37538e-15
		7.6	-5.2288e-15	7.23658e-15	9.56187e-15	1.06499e-14	-4.52183e-16	5.40158e-15
		7.61	-3.16237e-15	5.88732e-15	1.14114e-15	4.42335e-15	-1.38709e-15	6.08055e-15
		7.62	-9.44789e-15	5.82632e-15	9.43893e-15	1.52629e-14	8.77637e-16	6.94395e-15
		7.63	-5.54484e-15	4.70562e-15	9.25601e-15	1.23822e-14	-7.77662e-16	8.17071e-15
		7.64	-5.66053e-15	2.28379e-15	6.88759e-15	1.02243e-14	-1.03604e-14	1.23856e-14
		7.65	-5.01275e-15	3.40745e-15	5.55467e-15	6.84314e-15	-2.97892e-15	8.12365e-15
		7.66	-7.28946e-15	6.62947e-15	6.82122e-15	3.85575e-15	-7.02424e-15	1.31076e-14
		7.67	-2.95055e-15	3.83914e-15	8.95867e-15	7.45672e-15	-1.37646e-15	3.30396e-15
		7.68	-4.10425e-15	2.8719e-15	3.7431e-15	6.58252e-15	-7.32822e-16	8.86786e-15
		7.69	-6.56979e-15	5.81337e-15	-6.31197e-15	6.30759e-15	-2.83692e-15	8.8035e-15
		7.7	-6.89341e-15	3.97265e-15	6.24391e-15	6.04105e-15	1.63439e-15	6.99008e-15
		7.71	-4.11198e-15	6.24221e-15	-1.2927e-15	6.70459e-15	6.68037e-16	5.90095e-15
		7.72	-5.90206e-15	3.44105e-15	-1.78682e-15	4.86898e-15	3.97184e-15	5.50365e-15
		7.73	-1.19222e-14	9.411e-15	8.11757e-15	9.37985e-15	-7.67206e-15	9.18941e-15
		7.74	-8.19277e-15	3.35246e-15	3.93713e-15	8.62624e-15	-5.75541e-15	6.53411e-15
		7.75	-8.71536e-15	5.00083e-15	1.26312e-14	9.9077e-15	-4.63781e-15	4.68742e-15
		7.76	-1.05135e-14	6.56341e-15	1.20132e-14	1.06772e-14	2.47227e-15	3.68228e-15
		7.77	-5.32761e-15	2.91348e-15	6.54132e-15	9.58861e-15	-9.44282e-15	1.481e-14
		7.78	-5.61187e-15	3.70272e-15	2.41596e-15	4.59214e-15	-2.65084e-15	7.6574e-15
		7.79	-8.1799e-15	4.10515e-15	6.15578e-15	8.77815e-15	-5.12287e-15	1.02022e-14
		7.8	-7.5854e-15	2.48968e-15	-3.3813e-15	7.07418e-15	-1.50285e-15	7.29813e-15
		7.81	-5.73041e-15	1.84107e-15	4.28137e-15	8.48416e-15	-5.03134e-15	9.84976e-15
		7.82	-9.4632e-15	6.34444e-15	7.80626e-15	6.13061e-15	-7.50146e-15	1.43908e-14
		7.83	-1.78398e-15	3.79981e-15	-1.81272e-15	8.9456e-15	-3.16256e-15	1.25428e-14
		7.84	-1.02915e-14	7.23266e-15	1.48659e-15	8.22242e-15	-7.20736e-15	1.34816e-14
		7.85	-4.37889e-15	4.0347e-15	3.35269e-15	5.90508e-15	-3.57622e-15	6.15685e-15
		7.86	-1.05768e-14	6.58573e-15	9.34985e-16	6.84918e-15	-4.7035e-15	9.92769e-15
		7.87	-4.69506e-15	2.17372e-15	6.10938e-15	8.06696e-15	2.07089e-15	6.10994e-15
		7.88	-4.66884e-15	3.42657e-15	-8.31906e-15	1.17585e-14	2.16623e-15	6.43053e-15
		7.89	-5.44501e-15	2.7276e-15	3.10306e-15	1.14747e-14	-9.90094e-15	1.1999e-14
		7.9	-3.70469e-15	2.1359e-15	8.06939e-15	1.30641e-14	-4.39324e-16	7.70626e-15
		7.91	1.08685e-15	2.46661e-15	-4.80029e-15	7.93235e-15	4.43253e-15	5.27644e-15
		7.92	-3.04521e-16	3.28556e-15	2.03904e-15	5.21235e-15	-7.07155e-15	1.18506e-14
		7.93	-3.44131e-15	4.03727e-15	-1.10448e-15	1.00693e-14	-3.4995e-15	8.65401e-15
		7.94	-2.2376e-15	2.84918e-15	1.27818e-16	4.86979e-15	-4.09653e-15	8.89531e-15
		7.95	-4.11953e-15	5.70778e-15	2.97175e-15	5.97501e-15	-4.86963e-15	8.95159e-15
		7.96	-5.0331e-15	6.7538e-15	-4.64197e-15	5.30905e-15	-6.15223e-15	1.23524e-14
		7.97	-2.72153e-15	1.62564e-15	3.12151e-15	7.28025e-15	-2.48486e-15	5.82876e-15
		7.98	-2.99688e-15	7.11269e-15	1.12342e-15	7.51804e-15	-6.13907e-15	9.05367e-15
		7.99	-9.40376e-15	6.47385e-15	6.03e-15	6.43578e-15	-4.40401e-15	1.43686e-14
		8	-6.19197e-15	6.91218e-15	-9.52849e-16	1.02653e-14	-2.73737e-15	7.68918e-15
		8.01	-1.89158e-15	5.0132e-15	7.23929e-15	1.08665e-14	-5.23649e-15	1.09725e-14
		8.02	1.68298e-15	4.20056e-15	2.93026e-15	8.63578e-15	-5.92437e-15	9.90553e-15
		8.03	-3.81688e-15	6.25441e-15	4.35949e-15	5.10364e-15	-2.25418e-15	5.74596e-15
		8.04	-4.45115e-15	4.36304e-15	-5.00613e-16	6.16827e-15	-1.91922e-15	7.19845e-15
		8.05	-1.01316e-15	4.32819e-15	2.14181e-15	8.06001e-15	-4.69348e-15	8.51616e-15
		8.06	-3.93183e-15	3.30933e-15	-3.38072e-15	5.13054e-15	-5.89275e-15	1.16442e-14
		8.07	-2.61585e-15	5.55243e-15	8.76653e-15	1.54807e-14	-5.46146e-15	1.05903e-14
		8.08	-1.12493e-14	6.15799e-15	-9.39668e-16	3.54574e-15	-3.50234e-15	6.82776e-15
		8.09	-5.70347e-15	3.73996e-15	-7.62378e-15	8.92131e-15	8.56842e-15	9.56036e-15
		8.1	-7.11394e-15	4.84747e-15	-5.07833e-15	8.60776e-15	-1.14057e-14	1.65159e-14
		8.11	-1.27579e-14	7.66208e-15	-2.50966e-15	1.28915e-14	-2.33924e-15	7.91437e-15
		8.12	-9.3822e-15	5.5425e-15	-5.48423e-15	1.1213e-14	-3.65148e-15	6.94002e-15
		8.13	-3.86305e-15	2.74405e-15	-8.18749e-16	6.96204e-15	-8.32537e-15	1.07678e-14
		8.14	-3.22621e-15	4.56713e-15	-3.45807e-15	7.31568e-15	-1.1143e-15	6.64343e-15
		8.15	-5.42967e-15	2.87515e-15	2.27541e-15	9.78672e-15	-1.51614e-15	5.85966e-15
		8.16	-8.40743e-15	3.39698e-15	8.7849e-15	1.07655e-14	1.80646e-15	5.49375e-15
		8.17	-8.54404e-15	5.73286e-15	1.11422e-14	1.48519e-14	-9.80879e-16	4.91778e-15
		8.18	-7.27521e-15	4.49771e-15	9.68739e-16	1.3887e-14	-1.59913e-15	5.59353e-15
		8.19	-4.9206e-15	3.25588e-15	1.39197e-15	9.26289e-15	-4.51217e-15	9.34168e-15
		8.2	-3.04649e-15	3.14819e-15	2.43996e-15	1.13986e-14	-2.5121e-15	6.62145e-15
		8.21	-8.59451e-15	4.34589e-15	-1.20126e-15	8.13891e-15	-6.45033e-15	7.14979e-15
		8.22	-1.45049e-14	7.43477e-15	-6.11085e-15	1.04395e-14	3.63188e-16	4.32836e-15
		8.23	-9.82964e-15	4.18881e-15	1.40207e-15	7.73983e-15	-6.76872e-15	9.1198e-15
		8.24	-6.94662e-15	3.89709e-15	2.60787e-15	1.37878e-14	-4.59991e-16	2.84465e-15
		8.25	-6.61414e-15	4.35892e-15	4.41347e-15	1.46112e-14	4.36098e-15	5.67296e-15
		8.26	-1.20733e-14	3.31275e-15	-2.41495e-15	7.60333e-15	-1.73937e-15	3.82959e-15
		8.27	-4.42077e-15	1.75475e-15	1.13747e-15	1.13749e-14	6.72382e-17	5.78355e-15
		8.28	-1.00802e-14	8.11398e-15	2.22954e-15	1.05179e-14	-2.35716e-15	4.30171e-15
		8.29	-1.06674e-14	3.89304e-15	-6.55385e-15	1.10662e-14	2.43873e-15	3.17053e-15
		8.3	-1.38201e-14	4.97058e-15	-1.91721e-16	6.08652e-15	4.91997e-15	2.78258e-15
		8.31	-5.61495e-15	5.65205e-15	-6.02142e-15	6.94929e-15	2.83703e-15	5.17326e-15
		8.32	-4.79675e-15	2.8611e-15	1.3719e-15	9.79316e-15	-7.66488e-16	5.64755e-15
		8.33	-1.76815e-15	5.22881e-15	1.08924e-14	1.47976e-14	-1.18717e-15	1.86943e-15
		8.34	-5.61214e-15	5.09607e-15	2.29315e-15	1.01228e-14	2.13881e-15	3.00863e-15
		8.35	-3.58479e-15	4.12694e-15	-6.89926e-15	7.25904e-15	3.77141e-15	1.78762e-15
		8.36	-4.17212e-15	3.29595e-15	-8.51819e-16	1.13683e-14	1.49925e-16	3.41759e-15
		8.37	-5.37988e-15	5.80359e-15	-2.03144e-15	1.33403e-14	-5.25493e-15	7.30409e-15
		8.38	-8.17458e-15	7.71977e-15	5.35763e-15	1.39581e-14	5.59945e-15	3.06579e-15
		8.39	-9.88267e-15	7.64328e-15	7.69976e-15	1.56373e-14	1.87513e-15	1.24492e-15
		8.4	-4.94459e-15	5.96264e-15	2.8202e-16	1.02201e-14	3.19872e-16	1.29295e-15
		8.41	-5.04617e-15	5.45378e-15	5.50709e-15	1.38189e-14	3.89968e-15	1.26858e-15
		8.42	-6.11097e-15	6.59122e-15	-2.57053e-15	9.77705e-15	-6.20367e-16	8.53386e-15
		8.43	-3.77986e-15	5.68794e-15	-1.85559e-15	1.53081e-14	5.26639e-17	3.99999e-15
		8.44	-5.93806e-15	7.22901e-15	-7.69511e-16	6.95638e-15	1.68525e-15	2.52156e-15
		8.45	-2.77178e-15	5.55848e-15	3.53375e-15	1.21696e-14	-2.29973e-15	1.92947e-15
		8.46	-3.41548e-15	6.45562e-15	5.10664e-15	1.16459e-14	-5.52447e-15	5.20039e-15
		8.47	2.32202e-15	6.0814e-15	4.06509e-15	1.24663e-14	-4.91001e-16	7.31832e-16
		8.48	-3.42269e-15	6.84759e-15	9.16967e-15	1.54688e-14	3.04705e-15	3.56415e-15
		8.49	-2.9969e-16	5.61774e-15	8.14106e-16	9.98026e-15	1.24325e-15	1.36494e-15
		8.5	-7.81393e-15	8.19752e-15	2.37258e-16	8.60575e-15	2.52512e-15	3.3351e-15
		8.51	-6.66337e-15	5.83709e-15	7.08141e-16	8.20444e-15	-3.21537e-15	7.4148e-15
		8.52	-2.90212e-15	4.94652e-15	1.794e-15	5.58579e-15	-1.25272e-16	5.19693e-15
		8.53	-3.57764e-15	7.37918e-15	3.49356e-15	1.28754e-14	-2.42157e-15	2.15311e-15
		8.54	-8.24611e-15	9.10538e-15	2.59466e-15	9.19968e-15	-1.01218e-14	5.56028e-15
		8.55	-7.25734e-15	7.65695e-15	6.4558e-16	6.71477e-15	-1.22779e-14	8.37866e-15
		8.56	-9.4932e-15	1.04801e-14	-4.48193e-15	9.42747e-15	-9.94708e-15	9.29186e-15
		8.57	-1.12213e-15	7.73432e-15	1.47112e-15	1.3873e-14	-3.65842e-15	4.19056e-15
		8.58	-4.85147e-15	7.2629e-15	2.10204e-15	1.47593e-14	1.47818e-16	2.7694e-15
		8.59	-7.72263e-15	7.74029e-15	2.87903e-15	1.6064e-14	2.10855e-15	3.09069e-15
		8.6	-5.81653e-15	5.77427e-15	-4.97693e-16	9.60864e-15	-6.79736e-15	7.81385e-15
		8.61	-7.96764e-15	7.55701e-15	-4.68041e-15	7.01282e-15	-4.63453e-15	3.02108e-15
		8.62	-7.36436e-15	5.96411e-15	-2.61933e-15	8.20847e-15	-1.32e-14	1.19362e-14
		8.63	-9.08745e-15	6.05101e-15	1.38109e-15	1.12329e-14	-1.09466e-15	3.41032e-15
		8.64	-6.44818e-15	7.47167e-15	-2.85765e-15	1.03649e-14	3.3152e-16	1.62703e-15
		8.65	-5.83313e-15	6.74689e-15	-4.13519e-16	8.9441e-15	1.40926e-15	1.00893e-15
		8.66	-1.04206e-14	6.71861e-15	7.5191e-16	1.39128e-14	-5.83274e-15	4.0814e-15
		8.67	-1.04907e-14	5.71307e-15	-1.44832e-15	8.00102e-15	1.5786e-15	2.09456e-15
		8.68	-4.691e-15	4.05412e-15	4.37639e-15	1.11203e-14	7.27521e-15	6.75999e-15
		8.69	-1.17112e-14	4.27345e-15	-3.23862e-16	1.11906e-14	7.58876e-17	1.02161e-15
		8.7	-6.41709e-15	4.60672e-15	8.21679e-15	1.49999e-14	-3.01383e-15	7.33084e-16
		8.71	-1.03241e-14	5.38964e-15	-9.85252e-16	1.0681e-14	-4.5813e-15	8.35116e-15
		8.72	-9.0574e-15	5.26076e-15	1.02232e-15	9.92406e-15	-2.14891e-15	1.19485e-15
		8.73	-2.06338e-15	2.52103e-15	3.15418e-16	1.07216e-14	-1.33287e-15	1.55455e-15
		8.74	-8.14686e-15	6.51749e-15	-7.8025e-15	7.88402e-15	3.74556e-15	3.75388e-15
		8.75	-5.73018e-15	4.14735e-15	-4.15407e-15	7.32105e-15	-7.73439e-16	1.90967e-15
		8.76	-6.29626e-15	3.06899e-15	2.55097e-16	1.01265e-14	-2.12577e-15	3.97425e-15
		8.77	-1.0598e-14	4.01021e-15	1.04497e-15	9.89842e-15	-8.16527e-15	9.0215e-15
		8.78	-7.65535e-15	3.61338e-15	1.78595e-16	1.10299e-14	2.76306e-16	1.65509e-15
		8.79	-1.54461e-15	5.35071e-15	7.66355e-15	1.75455e-14	2.53247e-16	6.06823e-16
		8.8	-3.47808e-15	2.81967e-15	-8.25768e-15	1.08826e-14	1.42238e-15	3.5736e-15
		8.81	-5.06145e-15	4.40959e-15	-6.58726e-15	7.47408e-15	-2.69754e-15	3.56628e-15
		8.82	-4.49899e-15	6.43236e-15	-7.07934e-15	9.46979e-15	-7.01773e-15	8.51535e-15
		8.83	-8.68757e-15	3.00081e-15	-5.69129e-16	1.06974e-14	1.71413e-15	1.50551e-15
		8.84	-8.19125e-15	6.08276e-15	2.60841e-15	7.55112e-15	-5.05937e-16	3.32411e-15
		8.85	-9.36321e-15	5.32991e-15	3.23456e-15	1.64749e-14	-6.22885e-15	1.03383e-14
		8.86	-3.41957e-15	4.40656e-15	1.55996e-15	8.80226e-15	1.7136e-15	1.06162e-14
		8.87	-9.54038e-15	7.751e-15	-2.01637e-15	8.65256e-15	8.33745e-16	3.05679e-15
		8.88	-1.17954e-15	3.0961e-15	1.13401e-14	1.46366e-14	2.31912e-15	1.78868e-15
		8.89	-5.58808e-15	2.92512e-15	-3.77429e-16	1.12068e-14	1.85972e-15	5.61747e-15
		8.9	-8.99897e-15	6.91588e-15	2.70323e-15	9.64386e-15	2.98266e-15	3.13412e-15
		8.91	-7.35027e-15	5.64172e-15	-1.45875e-15	1.24455e-14	2.58792e-15	4.15798e-15
		8.92	-3.58833e-15	4.15494e-15	-3.93332e-17	1.56823e-14	-3.52662e-15	6.36039e-15
		8.93	-6.80548e-15	7.07683e-15	3.73671e-15	9.67293e-15	5.16446e-15	4.08028e-15
		8.94	-1.13892e-14	5.04284e-15	8.77316e-15	1.12647e-14	9.83414e-15	2.00027e-15
		8.95	-6.98811e-15	5.12615e-15	-8.61784e-15	8.1857e-15	-3.09385e-15	8.0856e-15
		8.96	-9.76334e-15	5.0923e-15	6.4497e-15	1.52602e-14	1.88904e-15	1.91432e-15
		8.97	-1.11729e-14	7.12331e-15	4.15905e-15	8.59054e-15	3.50176e-15	3.50221e-15
		8.98	-3.25943e-15	3.99793e-15	-8.03248e-16	6.4921e-15	1.04692e-14	7.2891e-15
		8.99	-8.43254e-15	3.25026e-15	2.83405e-15	6.67328e-15	7.68176e-15	5.30105e-15
		9	-9.89557e-15	6.84421e-15	1.66867e-15	6.24826e-15	-1.27924e-15	6.86102e-15
		9.01	-1.0555e-14	4.10092e-15	5.98154e-15	1.25042e-14	-4.70345e-15	1.20034e-14
		9.02	-5.9452e-15	5.47043e-15	8.65737e-15	1.46269e-14	-3.8105e-15	6.7903e-15
		9.03	-1.43741e-14	7.43748e-15	4.00977e-15	9.58908e-15	1.20282e-14	6.70708e-15
		9.04	-8.4523e-15	4.66967e-15	1.92644e-16	9.77932e-15	3.21716e-15	3.81251e-15
		9.05	-6.60308e-15	2.89873e-15	-1.09985e-14	1.16433e-14	3.72883e-15	7.48825e-15
		9.06	-7.71856e-15	5.66795e-15	-4.40053e-15	1.11925e-14	1.04718e-15	7.0765e-15
		9.07	-1.1705e-14	6.43225e-15	-1.51416e-15	1.18112e-14	1.76125e-15	6.27964e-15
		9.08	-1.46716e-14	5.20858e-15	1.25021e-15	5.8083e-15	-3.75611e-16	8.4619e-15
		9.09	-1.10721e-14	5.7616e-15	3.04368e-15	1.24335e-14	7.48261e-15	4.41215e-15
		9.1	-4.39857e-15	5.91452e-15	3.22058e-15	1.00852e-14	1.00651e-15	8.71246e-15
		9.11	-1.27253e-14	4.92892e-15	-2.13765e-15	9.77225e-15	-2.33506e-15	1.00426e-14
		9.12	-7.318e-15	2.23027e-15	-1.55174e-16	1.18236e-14	3.29216e-15	9.40577e-15
		9.13	-7.9934e-15	5.09708e-15	3.00319e-15	1.50099e-14	2.77422e-15	7.00963e-15
		9.14	-6.95899e-15	1.85068e-15	-6.68976e-15	1.15908e-14	8.4081e-16	4.85153e-15
		9.15	-3.01731e-15	4.51654e-15	-6.21475e-15	1.01918e-14	2.95819e-15	6.46899e-15
		9.16	-1.20474e-14	2.22383e-15	4.05641e-15	1.36829e-14	-2.30232e-17	5.55167e-15
		9.17	-9.05687e-15	2.7067e-15	-5.70762e-16	1.03049e-14	-1.19629e-15	6.80764e-15
		9.18	-1.28068e-14	5.31248e-15	-1.99661e-15	1.05079e-14	4.21984e-15	8.92056e-15
		9.19	-1.09694e-14	2.93891e-15	-4.8534e-15	7.29202e-15	8.17119e-15	6.71298e-15
		9.2	-1.06856e-14	3.63292e-15	-4.3347e-15	8.24322e-15	4.93061e-15	6.45869e-15
		9.21	-1.10521e-14	4.59127e-15	-2.70168e-15	1.26262e-14	-5.33515e-16	7.18663e-15
		9.22	-9.2067e-15	2.70622e-15	-1.38848e-15	1.23685e-14	-2.22036e-16	1.15624e-14
		9.23	-1.12436e-14	1.91499e-15	-6.17524e-15	9.7095e-15	7.78069e-15	5.76617e-15
		9.24	-8.9014e-15	4.29755e-15	-4.21397e-15	8.60693e-15	5.69885e-15	4.19126e-15
		9.25	-1.57395e-14	9.45452e-15	-4.29877e-15	1.18903e-14	1.06224e-14	4.77627e-15
		9.26	-1.00027e-14	2.62284e-15	1.01234e-15	9.15806e-15	1.12535e-14	6.38169e-15
		9.27	-1.18874e-14	4.6908e-15	-3.97349e-16	1.03485e-14	1.6606e-14	9.10674e-15
		9.28	-8.25661e-15	5.15395e-15	-9.39343e-15	9.5597e-15	8.38925e-15	2.58296e-15
		9.29	-1.44339e-14	5.0471e-15	-4.72343e-15	5.89823e-15	4.98016e-15	8.31518e-15
		9.3	-9.22363e-15	7.26502e-15	7.97496e-16	1.05505e-14	-1.28564e-15	1.10815e-14
		9.31	-1.49426e-14	3.17041e-15	-1.44476e-14	8.35669e-15	6.01617e-15	7.391e-15
		9.32	-1.49043e-14	5.61375e-15	1.03431e-14	1.89037e-14	3.88918e-15	9.63227e-15
		9.33	-1.38523e-14	6.10732e-15	-6.55865e-15	1.15997e-14	7.48057e-15	7.46528e-15
		9.34	-8.60744e-15	3.25618e-15	-2.7588e-15	6.93896e-15	7.78771e-15	7.99518e-15
		9.35	-1.39151e-14	6.28581e-15	-1.34967e-16	1.06487e-14	5.56585e-15	8.45287e-15
		9.36	-1.08629e-14	5.43898e-15	-1.11584e-15	1.19773e-14	-5.36044e-15	1.22916e-14
		9.37	-1.17998e-14	6.61323e-15	-3.90109e-15	1.08643e-14	8.36118e-15	7.43686e-15
		9.38	-9.15282e-15	5.39074e-15	-1.57575e-15	1.28416e-14	4.46387e-15	9.08857e-15
		9.39	-1.65242e-14	4.99002e-15	-2.41044e-15	8.21186e-15	2.57452e-15	1.14068e-14
		9.4	-1.1396e-14	3.12347e-15	-9.66546e-15	7.1543e-15	6.06543e-16	9.33021e-15
		9.41	-1.3405e-14	2.67826e-15	7.01557e-15	1.04755e-14	3.01963e-15	1.10145e-14
		9.42	-1.04706e-14	3.90433e-15	5.35782e-15	1.26511e-14	3.30198e-15	9.03997e-15
		9.43	-1.14206e-14	3.66802e-15	6.72793e-16	8.25344e-15	7.58887e-15	5.24593e-15
		9.44	-2.1151e-14	8.14483e-15	-6.62269e-15	6.6663e-15	1.36709e-14	9.21882e-15
		9.45	-8.68459e-15	5.24772e-15	-6.67947e-15	1.11438e-14	1.22592e-15	8.77017e-15
		9.46	-1.00123e-14	2.4516e-15	-5.62247e-15	7.86574e-15	3.4987e-15	9.19378e-15
		9.47	-1.12457e-14	4.62155e-15	-3.49079e-15	5.365e-15	2.95407e-15	8.12137e-15
		9.48	-1.07606e-14	1.66941e-15	1.32123e-15	4.1368e-15	6.9101e-15	6.95373e-15
		9.49	-1.49247e-14	2.83879e-15	-1.40561e-15	6.81693e-15	-2.78689e-15	1.22842e-14
		9.5	-8.0206e-15	4.28045e-15	-2.23446e-15	1.41323e-14	3.99375e-15	9.31948e-15
		9.51	-1.45931e-14	3.15669e-15	3.9031e-15	9.01892e-15	6.27612e-15	7.03471e-15
		9.52	-1.10968e-14	6.15985e-15	-6.87108e-15	9.73175e-15	1.34055e-15	1.02232e-14
		9.53	-1.44807e-14	7.21328e-15	-9.26323e-15	9.21952e-15	1.0811e-14	8.08596e-15
		9.54	-1.91421e-14	6.66099e-15	2.17625e-15	6.62713e-15	8.028e-15	9.1251e-15
		9.55	-1.5235e-14	4.71585e-15	-1.56116e-16	1.18633e-14	8.73472e-15	7.5941e-15
		9.56	-1.06213e-14	4.89222e-15	3.92825e-15	7.44156e-15	9.8873e-17	1.01478e-14
		9.57	-1.67736e-14	4.81409e-15	-2.42698e-15	3.40426e-15	1.75694e-15	1.23704e-14
		9.58	-1.22406e-14	4.01769e-15	-2.41669e-15	3.33256e-15	4.26637e-15	1.05375e-14
		9.59	-1.12923e-14	5.89633e-15	4.53521e-16	5.69959e-15	2.27275e-16	1.08677e-14
		9.6	-1.46076e-14	6.80239e-15	1.28096e-15	3.75868e-15	5.29522e-15	8.66099e-15
		9.61	-1.61775e-14	5.3298e-15	-3.14625e-15	4.4311e-15	8.53845e-15	7.66302e-15
		9.62	-1.03415e-14	4.32098e-15	3.31378e-15	7.15113e-15	2.69085e-15	9.38138e-15
		9.63	-1.64646e-14	7.1321e-15	-1.94123e-15	8.91072e-15	8.18936e-15	9.12618e-15
		9.64	-1.11093e-14	4.15944e-15	5.0843e-15	1.187e-14	1.20643e-14	8.21064e-15
		9.65	-5.2747e-15	3.70376e-15	4.07315e-15	1.25649e-14	-1.03933e-15	1.35609e-14
		9.66	-1.10234e-14	3.54495e-15	-2.50806e-15	5.49261e-15	3.95402e-15	1.19739e-14
		9.67	-6.57145e-15	3.74626e-15	-5.63072e-15	5.18404e-15	-6.91214e-16	1.08185e-14
		9.68	-8.18416e-15	2.65191e-15	-1.71316e-15	3.82205e-15	1.68605e-15	1.157e-14
		9.69	-1.3827e-14	4.27599e-15	5.40628e-15	4.2765e-15	4.11397e-15	9.67117e-15
		9.7	-1.69723e-14	5.0044e-15	4.07326e-15	9.10126e-15	1.02952e-14	1.05029e-14
		9.71	-5.32126e-15	3.70748e-15	-4.41152e-16	6.81767e-15	1.0009e-14	1.03838e-14
		9.72	-1.07147e-14	3.78283e-15	3.56682e-15	1.06738e-14	1.00462e-14	9.02497e-15
		9.73	-1.01169e-14	4.71246e-15	1.32353e-15	9.0781e-15	9.91097e-15	7.75236e-15
		9.74	-1.00283e-14	2.27862e-15	-8.95962e-15	7.34027e-15	6.98032e-15	8.76287e-15
		9.75	-1.26521e-14	3.34893e-15	-8.38056e-16	4.94392e-15	6.0381e-15	1.09018e-14
		9.76	-1.91343e-14	7.07014e-15	-2.52574e-15	7.20241e-15	7.05492e-15	7.90119e-15
		9.77	-1.96115e-14	4.5062e-15	-3.92925e-15	7.25807e-15	9.47368e-15	7.5738e-15
		9.78	-1.48679e-14	5.91994e-15	3.08318e-15	7.24315e-15	6.40681e-15	8.41658e-15
		9.79	-1.27894e-14	1.51472e-15	3.16818e-15	6.44572e-15	7.05806e-15	1.05473e-14
		9.8	-1.20837e-14	4.29014e-15	-4.01489e-15	5.67231e-15	5.41608e-15	8.67977e-15
		9.81	-1.43511e-14	6.5712e-15	-5.30719e-15	8.08076e-15	9.33506e-15	8.33883e-15
		9.82	-1.29726e-14	5.7676e-15	1.39526e-16	9.6699e-15	9.67346e-15	6.12883e-15
		9.83	-8.44217e-15	2.46734e-15	8.82451e-15	5.68545e-15	1.08978e-14	7.1619e-15
		9.84	-1.05355e-14	4.31116e-15	7.9041e-15	5.50223e-15	3.0611e-15	1.12132e-14
		9.85	-1.48077e-14	3.37432e-15	3.78925e-15	8.7716e-15	7.25462e-15	8.26631e-15
		9.86	-1.67449e-14	5.28122e-15	2.87217e-15	8.4141e-15	1.39778e-14	6.27457e-15
		9.87	-1.24537e-14	6.86715e-15	2.42253e-16	4.06546e-15	1.11217e-14	1.02941e-14
		9.88	-1.57727e-14	6.82637e-15	6.65092e-15	9.2289e-15	9.39288e-15	8.72911e-15
		9.89	-1.51532e-14	3.92718e-15	6.14312e-15	7.48668e-15	1.87248e-14	9.82119e-15
		9.9	-1.17718e-14	5.13004e-15	1.08319e-14	8.47085e-15	1.61878e-14	7.992e-15
		9.91	-1.72735e-14	6.8014e-15	9.51368e-15	8.67605e-15	1.40893e-14	1.16998e-14
		9.92	-1.78105e-14	8.40247e-15	-2.14629e-15	8.55748e-15	1.73411e-14	9.1148e-15
		9.93	-1.95943e-14	5.97785e-15	6.2927e-15	6.23814e-15	6.57488e-15	9.28661e-15
		9.94	-1.33848e-14	2.68833e-15	1.88838e-15	1.05246e-14	5.03226e-15	1.18316e-14
		9.95	-1.70915e-14	7.86988e-15	-1.7145e-15	5.66023e-15	1.6607e-14	7.97843e-15
		9.96	-1.94923e-14	8.14672e-15	6.1144e-15	3.77117e-15	8.78673e-15	1.01273e-14
		9.97	-1.10172e-14	3.90016e-15	8.388e-15	1.3366e-14	1.56641e-14	1.16509e-14
		9.98	-1.27241e-14	8.56057e-15	6.86465e-15	5.16279e-15	2.05976e-14	1.1409e-14
		9.99	-1.22156e-14	6.83469e-15	1.08703e-14	1.12635e-14	1.08207e-14	7.59451e-15
		10
		10.01
		10.02
		10.03
		10.04
		10.05
		10.06
		10.07
		10.08
		10.09
		10.1
		10.11
		10.12
		10.13
		10.14
		10.15
		10.16
		10.17
		10.18
		10.19
		10.2
		10.21
		10.22
		10.23
		10.24
		10.25
		10.26
		10.27
		10.28	5.23466e-13	4.87195e-14	6.5978e-13	8.27578e-14	3.10646e-13	4.96964e-14
		10.29	4.98203e-13	4.70006e-14	5.34934e-13	6.02819e-14	2.98743e-13	4.3846e-14
		10.3	4.89093e-13	4.75794e-14	4.63508e-13	4.68549e-14	3.06393e-13	2.95573e-14
		10.31	4.85871e-13	4.58308e-14	4.22243e-13	4.74381e-14	2.96421e-13	2.7931e-14
		10.32
		10.33
		10.34
		10.35
		10.36
		10.37
		10.38	7.37589e-13	6.89764e-14	7.73622e-13	8.22948e-14	4.21973e-13	6.47073e-14
		10.39	7.26488e-13	6.54716e-14	6.51189e-13	6.09094e-14	4.24139e-13	6.31048e-14
		10.4	7.26517e-13	6.5354e-14	5.75939e-13	4.60695e-14	4.15693e-13	4.16124e-14
		10.41	7.32701e-13	6.44625e-14	5.43812e-13	4.7994e-14	4.00307e-13	4.07593e-14
		10.42
		10.43
		10.44
		10.45
		10.46
		10.47
		10.48	9.68459e-13	9.06039e-14	8.99042e-13	8.41478e-14	5.5872e-13	8.30519e-14
		10.49	9.56868e-13	8.7007e-14	7.82295e-13	5.66861e-14	5.58844e-13	8.16604e-14
		10.5	9.65309e-13	8.85523e-14	7.18417e-13	5.2451e-14	5.41012e-13	5.97014e-14
		10.51	9.69219e-13	8.93546e-14	6.712e-13	4.7201e-14	5.37401e-13	6.44344e-14
		10.52
		10.53
		10.54
		10.55
		10.56
		10.57
		10.58	1.16428e-12	1.05645e-13	1.00924e-12	9.04635e-14	6.72599e-13	9.73323e-14
		10.59	1.14939e-12	1.04809e-13	8.91392e-13	6.7419e-14	6.67847e-13	9.6699e-14
		10.6	1.14191e-12	1.03073e-13	8.2399e-13	5.41516e-14	6.34472e-13	7.75086e-14
		10.61	1.1437e-12	1.03383e-13	7.80928e-13	5.18194e-14	6.40924e-13	7.57779e-14
		10.62
		10.63
		10.64
		10.65
		10.66
		10.67
		10.68	1.31736e-12	1.18716e-13	1.10766e-12	8.56752e-14	7.67771e-13	1.03572e-13
		10.69	1.30235e-12	1.18609e-13	9.78991e-13	5.9619e-14	7.68513e-13	1.02389e-13
		10.7	1.30828e-12	1.17643e-13	9.14158e-13	5.13154e-14	7.20385e-13	8.90235e-14
		10.71	1.30509e-12	1.16562e-13	8.84568e-13	5.23022e-14	7.26906e-13	8.52534e-14
		10.72
		10.73
		10.74
		10.75
		10.76
		10.77
		10.78	1.464e-12	1.30798e-13	1.17682e-12	8.58832e-14	8.58475e-13	1.08299e-13
		10.79	1.43886e-12	1.29637e-13	1.06724e-12	6.72487e-14	8.54907e-13	1.11627e-13
		10.8	1.43931e-12	1.28873e-13	1.01132e-12	6.13607e-14	8.00531e-13	9.45713e-14
		10.81	1.43837e-12	1.28714e-13	9.72917e-13	5.74909e-14	8.00196e-13	9.69843e-14
		10.82
		10.83
		10.84
		10.85
		10.86
		10.87
		10.88	1.59005e-12	1.44906e-13	1.2543e-12	8.94246e-14	9.33522e-13	1.13366e-13
		10.89	1.56007e-12	1.39299e-13	1.14977e-12	7.54021e-14	9.35049e-13	1.1394e-13
		10.9	1.56101e-12	1.40789e-13	1.06806e-12	6.4162e-14	8.72218e-13	1.00326e-13
		10.91	1.55767e-12	1.42298e-13	1.04675e-12	6.33648e-14	8.6607e-13	1.0689e-13
		10.92
		10.93
		10.94
		10.95
		10.96
		10.97
		10.98	1.68794e-12	1.5398e-13	1.30964e-12	9.19094e-14	1.00651e-12	1.21094e-13
		10.99	1.66351e-12	1.50056e-13	1.19783e-12	7.71432e-14	1.00238e-12	1.16699e-13
		11	1.66062e-12	1.48621e-13	1.14249e-12	7.61189e-14	9.3736e-13	1.0464e-13
		11.01	1.65247e-12	1.46082e-13	1.11136e-12	7.04666e-14	9.32252e-13	1.10605e-13
		11.02
		11.03
		11.04
		11.05
		11.06
		11.07
		11.08	1.76325e-12	1.5963e-13	1.37448e-12	9.37547e-14	1.07331e-12	1.18137e-13
		11.09	1.745e-12	1.56917e-13	1.26361e-12	8.2183e-14	1.07294e-12	1.18387e-13
		11.1	1.74187e-12	1.56171e-13	1.20938e-12	7.70492e-14	9.83101e-13	1.23123e-13
		11.11	1.73612e-12	1.54934e-13	1.18386e-12	7.94377e-14	9.90944e-13	1.1802e-13
		11.12
		11.13
		11.14
		11.15
		11.16
		11.17
		11.18	1.83537e-12	1.65186e-13	1.42375e-12	9.80529e-14	1.12973e-12	1.17822e-13
		11.19	1.80748e-12	1.61402e-13	1.30537e-12	8.93778e-14	1.12876e-12	1.18305e-13
		11.2	1.80346e-12	1.60461e-13	1.26292e-12	8.53369e-14	1.03312e-12	1.23546e-13
		11.21	1.79989e-12	1.61108e-13	1.22682e-12	8.4471e-14	1.03944e-12	1.24135e-13
		11.22	1.79749e-12	1.61224e-13	1.19479e-12	8.29009e-14	1.03389e-12	1.30549e-13
		11.23	1.79487e-12	1.60307e-13	1.18545e-12	8.10928e-14	1.0347e-12	1.2487e-13
		11.24	1.79847e-12	1.61409e-13	1.17546e-12	8.20234e-14	1.0306e-12	1.28543e-13
		11.25	1.79371e-12	1.60897e-13	1.16327e-12	8.06921e-14	1.04101e-12	1.27167e-13
		11.26	1.79328e-12	1.59491e-13	1.15712e-12	8.13533e-14	1.04777e-12	1.27645e-13
		11.27	1.79354e-12	1.59757e-13	1.15536e-12	8.07503e-14	1.04287e-12	1.30545e-13
		11.28	1.78708e-12	1.59528e-13	1.13589e-12	8.48991e-14	1.03978e-12	1.35011e-13
		11.29	1.78827e-12	1.602e-13	1.13243e-12	8.11971e-14	1.03933e-12	1.31982e-13
		11.3	1.7887e-12	1.60161e-13	1.12282e-12	8.3966e-14	1.04293e-12	1.27908e-13
		11.31	1.7819e-12	1.56263e-13	1.12675e-12	8.53524e-14	1.04312e-12	1.29449e-13
		11.32	1.78349e-12	1.58764e-13	1.12158e-12	8.60322e-14	1.04027e-12	1.30961e-13
		11.33	1.78125e-12	1.58193e-13	1.11048e-12	8.2427e-14	1.04237e-12	1.3068e-13
		11.34	1.78094e-12	1.57759e-13	1.11039e-12	8.17009e-14	1.04532e-12	1.28294e-13
		11.35	1.77942e-12	1.5763e-13	1.10191e-12	8.57012e-14	1.04214e-12	1.27535e-13
		11.36	1.77879e-12	1.57643e-13	1.10092e-12	8.63694e-14	1.0315e-12	1.35613e-13
		11.37	1.77015e-12	1.56414e-13	1.09599e-12	8.88474e-14	1.03342e-12	1.32262e-13
		11.38	1.7624e-12	1.56575e-13	1.09608e-12	8.82306e-14	1.03342e-12	1.31733e-13
		11.39	1.76018e-12	1.54448e-13	1.08659e-12	8.93254e-14	1.03019e-12	1.29635e-13
		11.4	1.76018e-12	1.56179e-13	1.07932e-12	9.09484e-14	1.02777e-12	1.32513e-13
		11.41	1.7586e-12	1.57666e-13	1.06808e-12	8.90341e-14	1.03049e-12	1.30999e-13
		11.42	1.75476e-12	1.54956e-13	1.06681e-12	8.8484e-14	1.01574e-12	1.41432e-13
		11.43	1.74818e-12	1.54726e-13	1.06965e-12	9.04619e-14	1.01626e-12	1.41264e-13
		11.44	1.74282e-12	1.54053e-13	1.0707e-12	9.06e-14	1.02325e-12	1.34013e-13
		11.45	1.73822e-12	1.54079e-13	1.06359e-12	9.09546e-14	1.02945e-12	1.29962e-13
		11.46	1.73134e-12	1.54568e-13	1.05901e-12	9.50511e-14	1.01774e-12	1.3956e-13
		11.47	1.73254e-12	1.53893e-13	1.06296e-12	9.14021e-14	1.01315e-12	1.37702e-13
		11.48	1.72765e-12	1.54667e-13	1.06208e-12	9.11445e-14	1.00626e-12	1.42706e-13
		11.49	1.72337e-12	1.52056e-13	1.05179e-12	9.31421e-14	1.01804e-12	1.32179e-13
		11.5	1.7288e-12	1.53752e-13	1.04176e-12	9.90349e-14	1.01131e-12	1.34682e-13
		11.51	1.71505e-12	1.51761e-13	1.04387e-12	9.59831e-14	1.0183e-12	1.32812e-13
		11.52	1.71557e-12	1.52811e-13	1.0368e-12	9.6118e-14	1.01757e-12	1.28786e-13
		11.53	1.7035e-12	1.53502e-13	1.03769e-12	9.67575e-14	1.01485e-12	1.31266e-13
		11.54	1.70243e-12	1.4991e-13	1.02966e-12	9.81097e-14	1.01274e-12	1.28049e-13
		11.55	1.70058e-12	1.49971e-13	1.06064e-12	9.13844e-14	1.00731e-12	1.33235e-13
		11.56	1.69582e-12	1.50657e-13	1.05364e-12	8.86014e-14	1.00598e-12	1.28902e-13
		11.57	1.68805e-12	1.48848e-13	1.04812e-12	8.77314e-14	1.00051e-12	1.31234e-13
		11.58	1.68553e-12	1.50272e-13	1.05212e-12	9.53386e-14	9.97678e-13	1.34397e-13
		11.59	1.67763e-12	1.48613e-13	1.04743e-12	9.3846e-14	1.00811e-12	1.24744e-13
		11.6	1.66961e-12	1.46635e-13	1.04199e-12	8.93759e-14	9.98307e-13	1.29382e-13
		11.61	1.66633e-12	1.46835e-13	1.03247e-12	9.36197e-14	9.94428e-13	1.2973e-13
		11.62	1.66475e-12	1.49394e-13	1.03394e-12	9.75179e-14	9.98528e-13	1.26346e-13
		11.63	1.65525e-12	1.48987e-13	1.03947e-12	9.18804e-14	9.91452e-13	1.26922e-13
		11.64	1.65815e-12	1.48376e-13	1.0361e-12	9.11496e-14	9.91603e-13	1.28326e-13
		11.65	1.65691e-12	1.48142e-13	1.02731e-12	9.26959e-14	9.97703e-13	1.20066e-13
		11.66	1.6453e-12	1.46667e-13	1.02019e-12	9.74706e-14	9.918e-13	1.2504e-13
		11.67	1.64369e-12	1.45893e-13	1.0194e-12	9.18849e-14	9.75629e-13	1.33843e-13
		11.68	1.63763e-12	1.45352e-13	1.01389e-12	9.71295e-14	9.72521e-13	1.33782e-13
		11.69	1.6402e-12	1.46007e-13	1.00937e-12	9.92516e-14	9.80233e-13	1.27954e-13
		11.7	1.6391e-12	1.46038e-13	1.0155e-12	9.59339e-14	9.7746e-13	1.26601e-13
		11.71	1.62837e-12	1.46121e-13	1.00075e-12	9.95502e-14	9.79207e-13	1.27789e-13
		11.72	1.62185e-12	1.4473e-13	9.97844e-13	1.01426e-13	9.8121e-13	1.24544e-13
		11.73	1.62609e-12	1.44277e-13	1.00475e-12	1.00944e-13	9.79999e-13	1.25755e-13
		11.74	1.62122e-12	1.44556e-13	1.00292e-12	9.73319e-14	9.74536e-13	1.25339e-13
		11.75	1.61501e-12	1.43281e-13	1.00114e-12	1.0145e-13	9.74929e-13	1.26817e-13
		11.76	1.60886e-12	1.44379e-13	9.83183e-13	1.01108e-13	9.62791e-13	1.32759e-13
		11.77	1.59811e-12	1.45595e-13	9.78374e-13	1.04696e-13	9.70854e-13	1.27481e-13
		11.78	1.59257e-12	1.44207e-13	9.72298e-13	1.04862e-13	9.69595e-13	1.24659e-13
		11.79	1.58735e-12	1.43232e-13	9.90159e-13	9.80525e-14	9.63734e-13	1.25522e-13
		11.8	1.58871e-12	1.4277e-13	9.94191e-13	9.84675e-14	9.6127e-13	1.24501e-13
		11.81	1.58296e-12	1.43726e-13	9.85961e-13	1.04012e-13	9.62463e-13	1.26511e-13
		11.82	1.5777e-12	1.43185e-13	9.79576e-13	1.01374e-13	9.61835e-13	1.27374e-13
		11.83	1.57675e-12	1.43314e-13	9.86606e-13	1.02353e-13	9.5343e-13	1.31281e-13
		11.84	1.5672e-12	1.41388e-13	9.82443e-13	9.9866e-14	9.63707e-13	1.24143e-13
		11.85	1.56573e-12	1.41547e-13	9.76338e-13	1.00385e-13	9.68401e-13	1.12333e-13
		11.86	1.56762e-12	1.40783e-13	9.75416e-13	1.04504e-13	9.56463e-13	1.2461e-13
		11.87	1.56761e-12	1.41449e-13	9.63177e-13	1.05387e-13	9.49402e-13	1.32165e-13
		11.88	1.55427e-12	1.41795e-13	9.61864e-13	1.07363e-13	9.50411e-13	1.2635e-13
		11.89	1.54647e-12	1.40387e-13	9.53174e-13	1.09033e-13	9.46318e-13	1.28707e-13
		11.9	1.54972e-12	1.41593e-13	9.55961e-13	1.06492e-13	9.50961e-13	1.2432e-13
		11.91	1.54337e-12	1.41206e-13	9.57537e-13	1.07013e-13	9.47168e-13	1.24038e-13
		11.92	1.53806e-12	1.41345e-13	9.53794e-13	1.06503e-13	9.46094e-13	1.23108e-13
		11.93	1.53684e-12	1.40971e-13	9.45629e-13	1.08759e-13	9.3842e-13	1.26989e-13
		11.94	1.53739e-12	1.41748e-13	9.55029e-13	1.08921e-13	9.45978e-13	1.2107e-13
		11.95	1.53213e-12	1.41131e-13	9.48537e-13	1.09015e-13	9.35581e-13	1.28928e-13
		11.96	1.53007e-12	1.39603e-13	9.46954e-13	1.07088e-13	9.37011e-13	1.29156e-13
		11.97	1.52214e-12	1.39545e-13	9.53443e-13	1.10332e-13	9.37119e-13	1.25937e-13
		11.98	1.51839e-12	1.3951e-13	9.51604e-13	1.06999e-13	9.36366e-13	1.24772e-13
		11.99	1.51029e-12	1.39895e-13	9.40548e-13	1.10361e-13	9.32306e-13	1.26403e-13
		12	1.51439e-12	1.40778e-13	9.41706e-13	1.03748e-13	9.3922e-13	1.19304e-13
		12.01	1.49953e-12	1.38043e-13	9.3896e-13	1.04697e-13	9.31369e-13	1.19804e-13
		12.02	1.50189e-12	1.37616e-13	9.45711e-13	1.06844e-13	9.27088e-13	1.25197e-13
		12.03	1.50066e-12	1.37424e-13	9.28479e-13	1.08982e-13	9.29596e-13	1.21347e-13
		12.04	1.49877e-12	1.37663e-13	9.20026e-13	1.10337e-13	9.30079e-13	1.17635e-13
		12.05	1.48958e-12	1.37477e-13	9.18841e-13	1.10032e-13	9.28239e-13	1.24215e-13
		12.06	1.48929e-12	1.38872e-13	9.19383e-13	1.1175e-13	9.25099e-13	1.20388e-13
		12.07	1.47879e-12	1.40128e-13	9.18419e-13	1.13488e-13	9.1882e-13	1.28463e-13
		12.08	1.48255e-12	1.39729e-13	9.12807e-13	1.11448e-13	9.24119e-13	1.19494e-13
		12.09	1.48073e-12	1.38216e-13	9.11316e-13	1.11621e-13	9.18499e-13	1.23174e-13
		12.1	1.4808e-12	1.37847e-13	9.09191e-13	1.09934e-13	9.21626e-13	1.2185e-13
		12.11	1.46544e-12	1.36809e-13	9.09086e-13	1.09949e-13	9.17758e-13	1.21899e-13
		12.12	1.46714e-12	1.36937e-13	9.08277e-13	1.12294e-13	9.1832e-13	1.24473e-13
		12.13	1.46085e-12	1.3665e-13	9.05299e-13	1.10584e-13	9.18042e-13	1.20439e-13
		12.14	1.45047e-12	1.35524e-13	9.08146e-13	1.14087e-13	9.21882e-13	1.16726e-13
		12.15	1.45199e-12	1.36097e-13	9.05506e-13	1.13248e-13	9.11853e-13	1.19933e-13
		12.16	1.44874e-12	1.35575e-13	8.92021e-13	1.17605e-13	9.18389e-13	1.18848e-13
		12.17	1.44307e-12	1.3592e-13	8.87939e-13	1.17184e-13	9.19448e-13	1.17828e-13
		12.18	1.44449e-12	1.35671e-13	8.8282e-13	1.16684e-13	9.08516e-13	1.20469e-13
		12.19	1.44439e-12	1.35614e-13	8.96285e-13	1.14094e-13	9.0698e-13	1.19912e-13
		12.2	1.43997e-12	1.34779e-13	8.89279e-13	1.16407e-13	9.0886e-13	1.20883e-13
		12.21	1.43582e-12	1.34873e-13	8.87209e-13	1.15121e-13	9.05307e-13	1.22289e-13
		12.22	1.43582e-12	1.35442e-13	8.87763e-13	1.15064e-13	9.06826e-13	1.18806e-13
		12.23	1.4269e-12	1.36322e-13	8.88296e-13	1.11449e-13	9.02827e-13	1.20428e-13
		12.24	1.42764e-12	1.3549e-13	8.85758e-13	1.11241e-13	8.99769e-13	1.25847e-13
		12.25	1.42126e-12	1.33183e-13	8.83113e-13	1.17065e-13	9.06167e-13	1.14998e-13
		12.26	1.41601e-12	1.33827e-13	8.98805e-13	1.11699e-13	9.02003e-13	1.21571e-13
		12.27	1.4141e-12	1.33717e-13	8.8267e-13	1.14065e-13	8.99091e-13	1.18658e-13
		12.28	1.41173e-12	1.33739e-13	8.76322e-13	1.17899e-13	8.97727e-13	1.18482e-13
		12.29	1.41361e-12	1.34472e-13	8.69237e-13	1.16644e-13	8.9836e-13	1.21981e-13
		12.3	1.40853e-12	1.33724e-13	8.82117e-13	1.15547e-13	8.96241e-13	1.22148e-13
		12.31	1.40246e-12	1.33314e-13	8.76443e-13	1.13061e-13	8.92579e-13	1.21486e-13
		12.32	1.39922e-12	1.32183e-13	8.77385e-13	1.12939e-13	8.92946e-13	1.25238e-13
		12.33	1.39426e-12	1.32009e-13	8.72766e-13	1.12091e-13	8.95069e-13	1.18977e-13
		12.34	1.39678e-12	1.32616e-13	8.83922e-13	1.11026e-13	8.913e-13	1.17592e-13
		12.35	1.39365e-12	1.34372e-13	8.7182e-13	1.12182e-13	8.91518e-13	1.1687e-13
		12.36	1.38954e-12	1.34366e-13	8.63812e-13	1.15921e-13	8.95849e-13	1.18927e-13
		12.37	1.39135e-12	1.32073e-13	8.67556e-13	1.15813e-13	8.95349e-13	1.104e-13
		12.38	1.38657e-12	1.32745e-13	8.69538e-13	1.12537e-13	8.88119e-13	1.17732e-13
		12.39	1.37901e-12	1.32172e-13	8.62099e-13	1.16144e-13	8.92506e-13	1.13598e-13
		12.4	1.37814e-12	1.31025e-13	8.60192e-13	1.14636e-13	8.88234e-13	1.15788e-13
		12.41	1.37872e-12	1.30848e-13	8.62743e-13	1.14011e-13	8.88646e-13	1.15402e-13
		12.42	1.37142e-12	1.30393e-13	8.50536e-13	1.1316e-13	8.77861e-13	1.23984e-13
		12.43	1.37299e-12	1.3031e-13	8.65501e-13	1.14932e-13	8.73429e-13	1.21668e-13
		12.44	1.36415e-12	1.30883e-13	8.58315e-13	1.12732e-13	8.83909e-13	1.16437e-13
		12.45	1.3669e-12	1.31465e-13	8.45714e-13	1.17527e-13	8.80419e-13	1.1464e-13
		12.46	1.36034e-12	1.30248e-13	8.46068e-13	1.18184e-13	8.78855e-13	1.18237e-13
		12.47	1.36185e-12	1.31576e-13	8.57093e-13	1.1316e-13	8.75713e-13	1.19856e-13
		12.48	1.36336e-12	1.28993e-13	8.57615e-13	1.12459e-13	8.8146e-13	1.15797e-13
		12.49	1.35095e-12	1.28563e-13	8.42481e-13	1.15102e-13	8.78948e-13	1.145e-13
		12.5	1.35038e-12	1.2974e-13	8.40897e-13	1.15229e-13	8.74125e-13	1.14836e-13
		12.51	1.35063e-12	1.30532e-13	8.34357e-13	1.17186e-13	8.63569e-13	1.23566e-13
		12.52	1.34508e-12	1.27921e-13	8.43208e-13	1.15559e-13	8.64739e-13	1.22793e-13
		12.53	1.34266e-12	1.30001e-13	8.40668e-13	1.16179e-13	8.73883e-13	1.14723e-13
		12.54	1.34028e-12	1.29927e-13	8.43762e-13	1.12787e-13	8.71842e-13	1.17175e-13
		12.55	1.34036e-12	1.28376e-13	8.39302e-13	1.14703e-13	8.67314e-13	1.17176e-13
		12.56	1.33147e-12	1.29873e-13	8.21876e-13	1.18034e-13	8.67772e-13	1.16769e-13
		12.57	1.33548e-12	1.29186e-13	8.34426e-13	1.15131e-13	8.63158e-13	1.21744e-13
		12.58	1.33396e-12	1.29227e-13	8.31143e-13	1.14301e-13	8.69882e-13	1.14027e-13
		12.59	1.32822e-12	1.28828e-13	8.37735e-13	1.09349e-13	8.66544e-13	1.15298e-13
		12.6	1.33063e-12	1.31164e-13	8.32592e-13	1.11544e-13	8.62967e-13	1.10687e-13
		12.61	1.32442e-12	1.27845e-13	8.26794e-13	1.14107e-13	8.60757e-13	1.1771e-13
		12.62	1.31484e-12	1.29699e-13	8.3279e-13	1.10021e-13	8.583e-13	1.14836e-13
		12.63	1.31759e-12	1.30715e-13	8.37599e-13	1.11784e-13	8.61626e-13	1.11286e-13
		12.64	1.31376e-12	1.27804e-13	8.32217e-13	1.10855e-13	8.65769e-13	1.08987e-13
		12.65	1.31344e-12	1.28883e-13	8.33511e-13	1.12783e-13	8.52328e-13	1.19033e-13
		12.66	1.30997e-12	1.29306e-13	8.25826e-13	1.14092e-13	8.56844e-13	1.12499e-13
		12.67	1.30732e-12	1.27955e-13	8.19207e-13	1.14304e-13	8.4893e-13	1.1713e-13
		12.68	1.30228e-12	1.27975e-13	8.28844e-13	1.12033e-13	8.55656e-13	1.14073e-13
		12.69	1.30614e-12	1.29089e-13	8.16678e-13	1.14943e-13	8.52595e-13	1.13913e-13
		12.7	1.30045e-12	1.27281e-13	8.13828e-13	1.11927e-13	8.4597e-13	1.15499e-13
		12.71	1.29983e-12	1.29137e-13	8.16913e-13	1.10932e-13	8.49138e-13	1.10073e-13
		12.72	1.29981e-12	1.29059e-13	8.06293e-13	1.16215e-13	8.5296e-13	1.10308e-13
		12.73	1.29584e-12	1.28393e-13	8.10905e-13	1.10237e-13	8.45288e-13	1.17029e-13
		12.74	1.29061e-12	1.27255e-13	8.09364e-13	1.12584e-13	8.42352e-13	1.19447e-13
		12.75	1.29283e-12	1.25929e-13	8.21824e-13	1.11377e-13	8.43695e-13	1.14898e-13
		12.76	1.28284e-12	1.26258e-13	8.09541e-13	1.14354e-13	8.47556e-13	1.12698e-13
		12.77	1.28419e-12	1.27987e-13	8.00658e-13	1.14759e-13	8.45297e-13	1.11727e-13
		12.78	1.28863e-12	1.27585e-13	8.09761e-13	1.13128e-13	8.43236e-13	1.10963e-13
		12.79	1.282e-12	1.26554e-13	7.9992e-13	1.16617e-13	8.4581e-13	1.09684e-13
		12.8	1.27912e-12	1.27733e-13	8.05416e-13	1.13407e-13	8.38653e-13	1.1335e-13
		12.81	1.27438e-12	1.26862e-13	8.06962e-13	1.14618e-13	8.36612e-13	1.1908e-13
		12.82	1.27813e-12	1.27555e-13	8.0453e-13	1.13431e-13	8.39679e-13	1.10453e-13
		12.83	1.2773e-12	1.27725e-13	7.91047e-13	1.1502e-13	8.38816e-13	1.11235e-13
		12.84	1.27019e-12	1.26341e-13	7.94318e-13	1.14241e-13	8.37734e-13	1.10186e-13
		12.85	1.26752e-12	1.25894e-13	8.00192e-13	1.15123e-13	8.37678e-13	1.08922e-13
		12.86	1.26748e-12	1.25787e-13	7.96207e-13	1.1413e-13	8.35036e-13	1.13531e-13
		12.87	1.26511e-12	1.27909e-13	7.89723e-13	1.12679e-13	8.35437e-13	1.11382e-13
		12.88	1.2632e-12	1.27722e-13	7.82738e-13	1.1508e-13	8.39297e-13	1.0805e-13
		12.89	1.26207e-12	1.27277e-13	7.91822e-13	1.08737e-13	8.37423e-13	1.08568e-13
		12.9	1.26624e-12	1.26701e-13	7.95932e-13	1.09259e-13	8.35079e-13	1.06075e-13
		12.91	1.26709e-12	1.27786e-13	7.73391e-13	1.14976e-13	8.29018e-13	1.08621e-13
		12.92	1.26019e-12	1.2723e-13	7.62787e-13	1.19313e-13	8.23703e-13	1.12489e-13
		12.93	1.25608e-12	1.26421e-13	7.65677e-13	1.20494e-13	8.31704e-13	1.11869e-13
		12.94	1.24865e-12	1.26983e-13	7.54255e-13	1.25713e-13	8.35862e-13	1.03333e-13
		12.95	1.25541e-12	1.28033e-13	7.49261e-13	1.27218e-13	8.36557e-13	1.03867e-13
		12.96	1.24705e-12	1.25814e-13	7.57398e-13	1.23479e-13	8.18077e-13	1.16549e-13
		12.97	1.25183e-12	1.25961e-13	7.51813e-13	1.20713e-13	8.22122e-13	1.11771e-13
		12.98	1.23994e-12	1.24093e-13	7.47167e-13	1.24386e-13	8.30141e-13	1.06166e-13
		12.99	1.25131e-12	1.26195e-13	7.42029e-13	1.2534e-13	8.21322e-13	1.08256e-13
		13	1.24263e-12	1.26165e-13	7.35303e-13	1.27185e-13	8.23719e-13	1.04753e-13
		13.01	1.24556e-12	1.26968e-13	7.53747e-13	1.23062e-13	8.16135e-13	1.10438e-13
		13.02	1.24189e-12	1.27598e-13	7.49591e-13	1.20104e-13	8.18782e-13	1.06237e-13
		13.03	1.23448e-12	1.28129e-13	7.49797e-13	1.25173e-13	8.19091e-13	1.13553e-13
		13.04	1.2389e-12	1.26689e-13	7.37254e-13	1.23745e-13	8.19416e-13	1.02924e-13
		13.05	1.23886e-12	1.28214e-13	7.523e-13	1.21558e-13	8.16685e-13	1.04878e-13
		13.06	1.22348e-12	1.26795e-13	7.46204e-13	1.19209e-13	8.09684e-13	1.07978e-13
		13.07	1.22562e-12	1.26408e-13	7.44087e-13	1.2133e-13	8.13158e-13	1.06994e-13
		13.08	1.22697e-12	1.25849e-13	7.4652e-13	1.21715e-13	8.11265e-13	1.08615e-13
		13.09	1.22664e-12	1.26517e-13	7.40062e-13	1.21213e-13	8.16975e-13	1.00685e-13
		13.1	1.22112e-12	1.26157e-13	7.49311e-13	1.2102e-13	8.15286e-13	1.03665e-13
		13.11	1.21964e-12	1.26067e-13	7.4137e-13	1.19996e-13	8.06395e-13	1.07281e-13
		13.12	1.21499e-12	1.27478e-13	7.41788e-13	1.18886e-13	8.06478e-13	1.07052e-13
		13.13	1.21686e-12	1.24199e-13	7.44497e-13	1.19388e-13	8.12152e-13	1.05328e-13
		13.14	1.22001e-12	1.27089e-13	7.42303e-13	1.19624e-13	8.108e-13	1.03694e-13
		13.15	1.2157e-12	1.28935e-13	7.37397e-13	1.21088e-13	8.10464e-13	9.94204e-14
		13.16	1.20369e-12	1.27648e-13	7.36598e-13	1.2013e-13	8.09627e-13	1.02874e-13
		13.17	1.21433e-12	1.26681e-13	7.39448e-13	1.21346e-13	8.06693e-13	1.0013e-13
		13.18	1.20651e-12	1.29193e-13	7.38185e-13	1.17159e-13	7.97871e-13	1.07161e-13
		13.19	1.20841e-12	1.27274e-13	7.38303e-13	1.20493e-13	8.0863e-13	9.89623e-14
		13.2	1.20801e-12	1.26476e-13	7.28893e-13	1.19822e-13	7.97942e-13	1.05262e-13
		13.21	1.2036e-12	1.25834e-13	7.23067e-13	1.23113e-13	8.00528e-13	1.01003e-13
		13.22	1.20399e-12	1.26085e-13	7.30125e-13	1.21292e-13	8.08005e-13	9.73825e-14
		13.23	1.20358e-12	1.25608e-13	7.27025e-13	1.22229e-13	8.22351e-13	8.55451e-14
		13.24	1.19866e-12	1.27267e-13	7.25151e-13	1.19053e-13	8.03418e-13	1.00049e-13
		13.25	1.20091e-12	1.25527e-13	7.20078e-13	1.2237e-13	7.8976e-13	1.09882e-13
		13.26	1.19596e-12	1.25545e-13	7.32761e-13	1.17083e-13	7.82685e-13	1.11175e-13
		13.27	1.19108e-12	1.25193e-13	7.30469e-13	1.22398e-13	7.91935e-13	1.06007e-13
		13.28	1.19686e-12	1.24404e-13	7.29665e-13	1.19283e-13	7.84863e-13	1.06667e-13
		13.29	1.18701e-12	1.24668e-13	7.29013e-13	1.20917e-13	7.90069e-13	1.07284e-13
		13.3	1.18564e-12	1.2551e-13	7.27042e-13	1.19276e-13	7.8863e-13	1.04723e-13
		13.31	1.18939e-12	1.26331e-13	7.19335e-13	1.21037e-13	7.93614e-13	9.83859e-14
		13.32	1.18975e-12	1.23951e-13	7.19305e-13	1.19965e-13	7.87184e-13	1.03674e-13
		13.33	1.18209e-12	1.26273e-13	7.26839e-13	1.16648e-13	7.95245e-13	9.91471e-14
		13.34	1.17565e-12	1.25771e-13	7.24372e-13	1.16819e-13	7.88677e-13	1.02004e-13
		13.35	1.17598e-12	1.23206e-13	7.24722e-13	1.11073e-13	7.83875e-13	1.02919e-13
		13.36	1.18175e-12	1.24942e-13	7.16276e-13	1.18409e-13	7.83427e-13	1.04107e-13
		13.37	1.17817e-12	1.23925e-13	7.3473e-13	1.13978e-13	7.86542e-13	1.0298e-13
		13.38	1.17418e-12	1.24954e-13	7.26915e-13	1.16808e-13	7.84636e-13	1.03974e-13
		13.39	1.17516e-12	1.25274e-13	7.1995e-13	1.18332e-13	7.8488e-13	1.00452e-13
		13.4	1.17029e-12	1.26047e-13	7.2276e-13	1.16443e-13	7.7362e-13	1.0963e-13
		13.41	1.17419e-12	1.2366e-13	7.14385e-13	1.21e-13	7.79047e-13	1.05322e-13
		13.42	1.17809e-12	1.2489e-13	7.19465e-13	1.17051e-13	7.76362e-13	1.10379e-13
		13.43	1.17204e-12	1.25386e-13	7.16589e-13	1.16461e-13	7.75985e-13	1.09109e-13
		13.44	1.16991e-12	1.24756e-13	7.17059e-13	1.17639e-13	7.74081e-13	1.07367e-13
		13.45	1.17001e-12	1.25183e-13	7.08214e-13	1.15595e-13	7.71209e-13	1.09481e-13
		13.46	1.16856e-12	1.24288e-13	7.13599e-13	1.15503e-13	7.74511e-13	1.04092e-13
		13.47	1.15842e-12	1.23594e-13	7.04046e-13	1.20125e-13	7.75231e-13	1.03065e-13
		13.48	1.16245e-12	1.23624e-13	7.06094e-13	1.23289e-13	7.77857e-13	1.0198e-13
		13.49	1.15836e-12	1.24569e-13	7.11014e-13	1.21036e-13	7.713e-13	1.06757e-13
		13.5	1.15645e-12	1.24987e-13	7.1213e-13	1.17544e-13	7.68967e-13	1.05314e-13
		13.51	1.15562e-12	1.24047e-13	7.06987e-13	1.18103e-13	7.72099e-13	1.04407e-13
		13.52	1.15843e-12	1.24018e-13	7.05103e-13	1.19959e-13	7.76834e-13	1.03397e-13
		13.53	1.16362e-12	1.25242e-13	7.06156e-13	1.21683e-13	7.7418e-13	1.08086e-13
		13.54	1.1586e-12	1.2597e-13	7.09093e-13	1.18682e-13	7.75611e-13	1.01517e-13
		13.55	1.16101e-12	1.24533e-13	7.05999e-13	1.18305e-13	7.69519e-13	1.08993e-13
		13.56	1.16197e-12	1.23802e-13	7.13413e-13	1.15228e-13	7.69258e-13	1.07461e-13
		13.57	1.15434e-12	1.24e-13	6.98449e-13	1.16226e-13	7.72959e-13	1.06108e-13
		13.58	1.15682e-12	1.22671e-13	6.99481e-13	1.19186e-13	7.72545e-13	1.03179e-13
		13.59	1.14499e-12	1.22312e-13	6.97084e-13	1.20997e-13	7.65242e-13	1.07301e-13
		13.6	1.13759e-12	1.2071e-13	7.07531e-13	1.16628e-13	7.61098e-13	1.09802e-13
		13.61	1.14896e-12	1.21374e-13	6.94396e-13	1.19906e-13	7.62806e-13	1.04337e-13
		13.62	1.14017e-12	1.19196e-13	6.98165e-13	1.19655e-13	7.65255e-13	1.05315e-13
		13.63	1.14253e-12	1.19004e-13	6.94189e-13	1.18239e-13	7.66057e-13	1.05692e-13
		13.64	1.13921e-12	1.2029e-13	6.95239e-13	1.15829e-13	7.58521e-13	1.07633e-13
		13.65	1.13936e-12	1.20461e-13	7.01222e-13	1.11283e-13	7.63199e-13	1.07936e-13
		13.66	1.13496e-12	1.19976e-13	6.93392e-13	1.17843e-13	7.56193e-13	1.13591e-13
		13.67	1.13927e-12	1.19962e-13	6.92175e-13	1.16674e-13	7.5977e-13	1.05713e-13
		13.68	1.13826e-12	1.17933e-13	7.01436e-13	1.13713e-13	7.6706e-13	1.02166e-13
		13.69	1.13555e-12	1.17592e-13	7.00179e-13	1.133e-13	7.54334e-13	1.12157e-13
		13.7	1.13882e-12	1.17882e-13	7.0563e-13	1.14087e-13	7.57981e-13	1.11912e-13
		13.71	1.13054e-12	1.19639e-13	7.00103e-13	1.16542e-13	7.59427e-13	1.05213e-13
		13.72	1.12451e-12	1.20991e-13	7.01147e-13	1.10829e-13	7.65453e-13	1.02249e-13
		13.73	1.12403e-12	1.17327e-13	7.0365e-13	1.11081e-13	7.55956e-13	1.04198e-13
		13.74	1.12456e-12	1.17338e-13	6.90828e-13	1.11787e-13	7.57232e-13	1.0753e-13
		13.75	1.11964e-12	1.17024e-13	6.96482e-13	1.1276e-13	7.56685e-13	1.07757e-13
		13.76	1.12044e-12	1.15342e-13	7.0325e-13	1.12083e-13	7.49301e-13	1.1099e-13
		13.77	1.11873e-12	1.17074e-13	6.84377e-13	1.14993e-13	7.46604e-13	1.08221e-13
		13.78	1.12596e-12	1.17957e-13	6.94277e-13	1.12778e-13	7.53803e-13	1.0206e-13
		13.79	1.11788e-12	1.1915e-13	6.92482e-13	1.12191e-13	7.47532e-13	1.08541e-13
		13.8	1.11282e-12	1.1895e-13	6.9471e-13	1.11087e-13	7.44836e-13	1.06439e-13
		13.81	1.11507e-12	1.18995e-13	6.91357e-13	1.15086e-13	7.42187e-13	1.09405e-13
		13.82	1.11383e-12	1.20135e-13	6.87995e-13	1.12006e-13	7.53095e-13	9.99149e-14
		13.83	1.11114e-12	1.18633e-13	6.77803e-13	1.14712e-13	7.56105e-13	9.95465e-14
		13.84	1.11497e-12	1.19914e-13	6.88397e-13	1.12213e-13	7.44263e-13	1.04428e-13
		13.85	1.1118e-12	1.19392e-13	6.86233e-13	1.14571e-13	7.50799e-13	1.03666e-13
		13.86	1.11091e-12	1.17102e-13	6.90482e-13	1.10072e-13	7.44811e-13	1.08342e-13
		13.87	1.10467e-12	1.15002e-13	6.83625e-13	1.16295e-13	7.44076e-13	1.05251e-13
		13.88	1.10194e-12	1.15324e-13	6.78957e-13	1.16932e-13	7.38352e-13	1.11823e-13
		13.89	1.10036e-12	1.14427e-13	6.79975e-13	1.11143e-13	7.41661e-13	1.0464e-13
		13.9	1.09516e-12	1.14367e-13	6.85458e-13	1.12183e-13	7.39646e-13	1.12217e-13
		13.91	1.10115e-12	1.13652e-13	6.80893e-13	1.13405e-13	7.39143e-13	1.08171e-13
		13.92	1.10538e-12	1.14977e-13	6.78226e-13	1.14887e-13	7.44405e-13	1.03723e-13
		13.93	1.09526e-12	1.13438e-13	6.81685e-13	1.13736e-13	7.40766e-13	1.03747e-13
		13.94	1.09313e-12	1.12716e-13	6.70582e-13	1.16529e-13	7.42388e-13	1.0258e-13
		13.95	1.09393e-12	1.1434e-13	6.84131e-13	1.13157e-13	7.34107e-13	1.08685e-13
		13.96	1.09299e-12	1.14343e-13	6.7804e-13	1.13518e-13	7.39433e-13	1.04499e-13
		13.97	1.09005e-12	1.15406e-13	6.8418e-13	1.10219e-13	7.36437e-13	1.03042e-13
		13.98	1.09142e-12	1.14134e-13	6.76176e-13	1.09234e-13	7.4401e-13	1.02819e-13
		13.99	1.08663e-12	1.13661e-13	6.71815e-13	1.14011e-13	7.36446e-13	1.07225e-13
		14	1.0895e-12	1.1344e-13	6.76242e-13	1.11766e-13	7.32017e-13	1.13198e-13
		14.01	1.08154e-12	1.12765e-13	6.76719e-13	1.09769e-13	7.30742e-13	1.10141e-13
		14.02	1.08721e-12	1.13148e-13	6.57762e-13	1.14822e-13	7.31651e-13	1.08061e-13
		14.03	1.07707e-12	1.13743e-13	6.62208e-13	1.14052e-13	7.25278e-13	1.09947e-13
		14.04	1.08168e-12	1.13509e-13	6.70964e-13	1.10153e-13	7.26461e-13	1.101e-13
		14.05	1.07852e-12	1.1173e-13	6.7386e-13	1.10043e-13	7.30234e-13	1.06557e-13
		14.06	1.07757e-12	1.12148e-13	6.74294e-13	1.08748e-13	7.28495e-13	1.06669e-13
		14.07	1.08163e-12	1.11112e-13	6.83155e-13	1.09634e-13	7.37914e-13	1.00203e-13
		14.08	1.07735e-12	1.11365e-13	6.7106e-13	1.11658e-13	7.33582e-13	9.97486e-14
		14.09	1.07695e-12	1.13716e-13	6.7597e-13	1.11044e-13	7.22546e-13	1.09768e-13
		14.1	1.06933e-12	1.11612e-13	6.67753e-13	1.12448e-13	7.28e-13	9.89801e-14
		14.11	1.06831e-12	1.10159e-13	6.79125e-13	1.09689e-13	7.22637e-13	1.04645e-13
		14.12	1.07482e-12	1.11595e-13	6.76573e-13	1.08362e-13	7.2724e-13	1.01166e-13
		14.13	1.065e-12	1.10463e-13	6.64602e-13	1.1053e-13	7.16543e-13	1.0926e-13
		14.14	1.071e-12	1.12629e-13	6.56388e-13	1.12455e-13	7.21019e-13	1.0035e-13
		14.15	1.06572e-12	1.12461e-13	6.64213e-13	1.09885e-13	7.1511e-13	1.04234e-13
		14.16	1.06756e-12	1.0962e-13	6.63463e-13	1.08232e-13	7.21468e-13	1.04303e-13
		14.17	1.06686e-12	1.10861e-13	6.53837e-13	1.14062e-13	7.23925e-13	9.69334e-14
		14.18	1.06506e-12	1.10452e-13	6.66598e-13	1.09607e-13	7.27218e-13	9.44107e-14
		14.19	1.05764e-12	1.08918e-13	6.59363e-13	1.13803e-13	7.17377e-13	1.04621e-13
		14.2	1.0591e-12	1.11888e-13	6.64945e-13	1.10511e-13	7.1518e-13	1.07972e-13
		14.21	1.06091e-12	1.11087e-13	6.6673e-13	1.06755e-13	7.14037e-13	1.0455e-13
		14.22	1.0526e-12	1.10688e-13	6.60632e-13	1.10897e-13	7.08195e-13	1.02646e-13
		14.23	1.0529e-12	1.1086e-13	6.75763e-13	1.02917e-13	7.17878e-13	1.03508e-13
		14.24	1.05285e-12	1.09779e-13	6.6529e-13	1.05218e-13	7.15279e-13	1.02926e-13
		14.25	1.04898e-12	1.10211e-13	6.57666e-13	1.08858e-13	7.14395e-13	1.06177e-13
		14.26	1.0517e-12	1.07623e-13	6.60003e-13	1.10087e-13	7.11651e-13	1.02478e-13
		14.27	1.04766e-12	1.08054e-13	6.62784e-13	1.08342e-13	7.09222e-13	1.06306e-13
		14.28	1.04384e-12	1.083e-13	6.60294e-13	1.06497e-13	7.14575e-13	1.01509e-13
		14.29	1.0429e-12	1.09052e-13	6.56799e-13	1.08049e-13	7.14061e-13	1.05069e-13
		14.3	1.04013e-12	1.07221e-13	6.62123e-13	1.07399e-13	7.06696e-13	1.05373e-13
		14.31	1.04108e-12	1.09535e-13	6.54689e-13	1.10741e-13	7.10423e-13	1.03916e-13
		14.32	1.03928e-12	1.07284e-13	6.57436e-13	1.06195e-13	7.04736e-13	1.07739e-13
		14.33	1.04031e-12	1.06967e-13	6.52566e-13	1.07944e-13	7.15823e-13	9.82221e-14
		14.34	1.03986e-12	1.08676e-13	6.65991e-13	1.07159e-13	7.10401e-13	1.02127e-13
		14.35	1.0375e-12	1.0731e-13	6.53571e-13	1.07749e-13	6.99765e-13	1.092e-13
		14.36	1.04194e-12	1.07234e-13	6.50792e-13	1.11508e-13	7.01847e-13	1.08868e-13
		14.37	1.03241e-12	1.04834e-13	6.44562e-13	1.12121e-13	7.08928e-13	1.00753e-13
		14.38	1.0335e-12	1.05226e-13	6.51235e-13	1.0909e-13	7.06149e-13	1.01272e-13
		14.39	1.03383e-12	1.07888e-13	6.53225e-13	1.08579e-13	6.93187e-13	1.09126e-13
		14.4	1.03022e-12	1.04858e-13	6.56307e-13	1.04729e-13	6.96106e-13	1.07842e-13
		14.41	1.02982e-12	1.06962e-13	6.52557e-13	1.09034e-13	7.03676e-13	1.00514e-13
		14.42	1.02452e-12	1.07694e-13	6.54321e-13	1.05283e-13	7.03352e-13	9.93079e-14
		14.43	1.02657e-12	1.06814e-13	6.54562e-13	1.0374e-13	6.97839e-13	1.04724e-13
		14.44	1.02523e-12	1.07029e-13	6.53541e-13	1.07222e-13	6.97501e-13	1.06789e-13
		14.45	1.02576e-12	1.06289e-13	6.49803e-13	1.07526e-13	6.96528e-13	1.04805e-13
		14.46	1.01947e-12	1.05052e-13	6.51275e-13	1.06734e-13	6.94235e-13	1.07717e-13
		14.47	1.01592e-12	1.04456e-13	6.41376e-13	1.1023e-13	6.95819e-13	1.03721e-13
		14.48	1.01681e-12	1.05932e-13	6.3741e-13	1.09445e-13	7.02062e-13	9.86154e-14
		14.49	1.01734e-12	1.04136e-13	6.48502e-13	1.0778e-13	6.92062e-13	1.04127e-13
		14.5	1.02105e-12	1.04558e-13	6.51425e-13	1.05548e-13	7.00321e-13	9.628e-14
		14.51	1.01841e-12	1.0453e-13	6.46446e-13	1.06992e-13	6.92259e-13	1.00047e-13
		14.52	1.01462e-12	1.03694e-13	6.46366e-13	1.05866e-13	7.0124e-13	9.83372e-14
		14.53	1.01809e-12	1.06323e-13	6.44754e-13	1.01727e-13	6.91854e-13	1.00979e-13
		14.54	1.0107e-12	1.04142e-13	6.40657e-13	1.03529e-13	6.9431e-13	1.00428e-13
		14.55	1.01851e-12	1.04572e-13	6.39215e-13	1.0538e-13	6.9142e-13	1.03636e-13
		14.56	1.00864e-12	1.05867e-13	6.38163e-13	1.06882e-13	6.9268e-13	1.03032e-13
		14.57	1.00988e-12	1.03253e-13	6.40139e-13	1.06648e-13	6.93485e-13	9.84992e-14
		14.58	1.00731e-12	1.03768e-13	6.46487e-13	1.0363e-13	6.96662e-13	9.86532e-14
		14.59	1.00696e-12	1.03386e-13	6.40149e-13	1.05189e-13	6.91731e-13	9.70341e-14
		14.6	1.00752e-12	1.03789e-13	6.34806e-13	1.07237e-13	6.87486e-13	1.02271e-13
		14.61	1.00779e-12	1.04662e-13	6.3944e-13	1.06961e-13	6.8859e-13	1.04353e-13
		14.62	1.00503e-12	1.06248e-13	6.35763e-13	1.05961e-13	6.88742e-13	1.00765e-13
		14.63	9.98682e-13	1.04454e-13	6.37422e-13	1.1346e-13	6.90092e-13	9.65825e-14
		14.64	1.00045e-12	1.05312e-13	6.40298e-13	1.1047e-13	6.87926e-13	9.76712e-14
		14.65	1.00368e-12	1.05828e-13	6.40275e-13	1.0248e-13	6.8741e-13	9.85647e-14
		14.66	9.97513e-13	1.04915e-13	6.35675e-13	1.03683e-13	6.88468e-13	1.00381e-13
		14.67	9.958e-13	1.05489e-13	6.4251e-13	9.992e-14	6.77394e-13	1.02493e-13
		14.68	9.98486e-13	1.04879e-13	6.4204e-13	1.03709e-13	6.83903e-13	1.01613e-13
		14.69	9.99619e-13	1.04724e-13	6.41762e-13	1.01696e-13	6.80366e-13	1.03894e-13
		14.7	9.9413e-13	1.04539e-13	6.29077e-13	1.04638e-13	6.79996e-13	9.93458e-14
		14.71	9.94717e-13	1.07027e-13	6.27002e-13	1.07465e-13	6.81987e-13	1.00618e-13
		14.72	9.96912e-13	1.05946e-13	6.35769e-13	1.0579e-13	6.81943e-13	1.00653e-13
		14.73	9.93673e-13	1.04064e-13	6.306e-13	1.0488e-13	6.85865e-13	9.61126e-14
		14.74	9.92753e-13	1.02808e-13	6.362e-13	1.01509e-13	6.8534e-13	9.74389e-14
		14.75	9.89789e-13	1.05218e-13	6.35476e-13	1.03552e-13	6.71169e-13	1.09503e-13
		14.76	9.96232e-13	1.04687e-13	6.3545e-13	1.01499e-13	6.7694e-13	1.04353e-13
		14.77	1.00087e-12	1.03911e-13	6.27745e-13	1.05477e-13	6.75588e-13	1.036e-13
		14.78	9.96324e-13	1.0436e-13	6.26687e-13	1.0493e-13	6.80182e-13	9.81585e-14
		14.79	9.92045e-13	1.0401e-13	6.20998e-13	1.06039e-13	6.6743e-13	1.07467e-13
		14.8	9.94353e-13	1.04242e-13	6.22593e-13	1.07088e-13	6.74126e-13	9.92969e-14
		14.81	9.86344e-13	1.03848e-13	6.36785e-13	1.03807e-13	6.78752e-13	1.01716e-13
		14.82	9.85952e-13	1.0412e-13	6.24011e-13	1.01666e-13	6.74967e-13	9.97865e-14
		14.83	9.8811e-13	1.04857e-13	6.23903e-13	1.02687e-13	6.71632e-13	1.01125e-13
		14.84	9.83497e-13	1.03375e-13	6.31382e-13	1.01347e-13	6.73058e-13	9.96246e-14
		14.85	9.81419e-13	1.03981e-13	6.18408e-13	1.03946e-13	6.77306e-13	9.85605e-14
		14.86	9.84425e-13	1.04681e-13	6.18756e-13	1.04878e-13	6.74672e-13	9.76523e-14
		14.87	9.80501e-13	1.04581e-13	6.22512e-13	1.03425e-13	6.76992e-13	9.47439e-14
		14.88	9.82391e-13	1.04218e-13	6.23159e-13	1.05227e-13	6.79843e-13	9.12072e-14
		14.89	9.79833e-13	1.04801e-13	6.28287e-13	9.80743e-14	6.68409e-13	1.02112e-13
		14.9	9.74341e-13	1.03286e-13	6.29924e-13	1.02018e-13	6.65369e-13	9.97626e-14
		14.91	9.75906e-13	1.02392e-13	6.26876e-13	1.0118e-13	6.6829e-13	9.76714e-14
		14.92	9.73504e-13	1.04563e-13	6.25412e-13	1.01887e-13	6.6312e-13	9.90583e-14
		14.93	9.68221e-13	1.01701e-13	6.22149e-13	1.02264e-13	6.61062e-13	9.8519e-14
		14.94	9.70941e-13	1.03661e-13	6.28032e-13	9.84945e-14	6.66728e-13	9.85021e-14
		14.95	9.69437e-13	1.03e-13	6.26065e-13	9.83174e-14	6.64648e-13	9.58752e-14
		14.96	9.67281e-13	1.02917e-13	6.26236e-13	1.02468e-13	6.63235e-13	9.42561e-14
		14.97	9.67213e-13	1.04349e-13	6.24877e-13	1.03562e-13	6.61247e-13	9.7965e-14
		14.98	9.68659e-13	1.02685e-13	6.26966e-13	9.9137e-14	6.63249e-13	9.58347e-14
		14.99	9.65131e-13	1.03247e-13	6.21377e-13	9.90672e-14	6.58483e-13	9.96427e-14
		15	9.63146e-13	1.03338e-13	6.29701e-13	9.63387e-14	6.57483e-13	9.90795e-14
		15.01	9.61749e-13	1.02847e-13	6.38423e-13	9.88182e-14	6.53205e-13	1.04286e-13
		15.02	9.59821e-13	1.03306e-13	6.26249e-13	1.02609e-13	6.60049e-13	1.01327e-13
		15.03	9.58188e-13	1.02399e-13	6.24778e-13	9.90782e-14	6.64052e-13	9.75914e-14
		15.04	9.57324e-13	1.03456e-13	6.20738e-13	9.99961e-14	6.62953e-13	9.61218e-14
		15.05	9.55914e-13	1.00955e-13	6.17733e-13	1.01681e-13	6.54237e-13	1.00434e-13
		15.06	9.62983e-13	1.02409e-13	6.14789e-13	1.03543e-13	6.54637e-13	9.58268e-14
		15.07	9.5686e-13	1.01466e-13	6.21633e-13	9.99409e-14	6.55308e-13	9.46148e-14
		15.08	9.56123e-13	1.00677e-13	6.12477e-13	1.00622e-13	6.48018e-13	1.00168e-13
		15.09	9.53364e-13	1.00249e-13	6.17566e-13	9.96729e-14	6.58142e-13	9.59292e-14
		15.1	9.56442e-13	1.02662e-13	6.20453e-13	9.53026e-14	6.53034e-13	9.93297e-14
		15.11	9.52648e-13	1.00755e-13	6.12937e-13	1.00645e-13	6.55432e-13	9.90985e-14
		15.12	9.51323e-13	1.02419e-13	6.23239e-13	9.68779e-14	6.56779e-13	9.20096e-14
		15.13	9.47124e-13	1.02008e-13	6.20105e-13	9.71815e-14	6.55146e-13	9.48494e-14
		15.14	9.50038e-13	1.00501e-13	6.20669e-13	9.63313e-14	6.44931e-13	1.01016e-13
		15.15	9.49204e-13	1.01491e-13	6.16239e-13	9.73661e-14	6.49195e-13	9.82826e-14
		15.16	9.50741e-13	9.9238e-14	6.20877e-13	9.51523e-14	6.47052e-13	9.56437e-14
		15.17	9.44953e-13	1.00583e-13	6.07207e-13	1.01501e-13	6.50537e-13	9.71182e-14
		15.18	9.39726e-13	9.9194e-14	6.12614e-13	1.00368e-13	6.4618e-13	1.01132e-13
		15.19	9.399e-13	9.80779e-14	6.10846e-13	9.99609e-14	6.46377e-13	9.48256e-14
		15.2	9.40185e-13	9.78076e-14	6.16609e-13	9.87583e-14	6.52378e-13	9.15562e-14
		15.21	9.39826e-13	9.7829e-14	6.1458e-13	9.66504e-14	6.46816e-13	9.56823e-14
		15.22	9.44604e-13	9.69499e-14	6.08983e-13	9.7989e-14	6.50656e-13	9.29564e-14
		15.23	9.44176e-13	9.50138e-14	6.07904e-13	9.79681e-14	6.38178e-13	9.95928e-14
		15.24	9.39159e-13	9.60621e-14	6.10942e-13	9.64079e-14	6.36579e-13	9.96761e-14
		15.25	9.3744e-13	9.40072e-14	6.03639e-13	9.73499e-14	6.42542e-13	9.7027e-14
		15.26	9.34108e-13	9.5157e-14	6.07326e-13	9.69028e-14	6.42748e-13	9.36858e-14
		15.27	9.31578e-13	9.64151e-14	6.09147e-13	9.71731e-14	6.4077e-13	9.29785e-14
		15.28	9.24672e-13	9.77737e-14	6.01391e-13	9.76263e-14	6.28768e-13	1.00889e-13
		15.29	9.31485e-13	9.71446e-14	6.04024e-13	9.83094e-14	6.28499e-13	1.03373e-13
		15.3	9.29184e-13	9.61418e-14	6.06937e-13	9.71646e-14	6.36549e-13	1.00117e-13
		15.31	9.27873e-13	9.62858e-14	6.04011e-13	9.8745e-14	6.35202e-13	9.97923e-14
		15.32	9.26331e-13	9.6348e-14	6.12442e-13	9.29505e-14	6.40229e-13	9.21038e-14
		15.33	9.19901e-13	9.70729e-14	6.08685e-13	9.6251e-14	6.3265e-13	9.69949e-14
		15.34	9.24765e-13	9.43797e-14	6.07843e-13	9.67398e-14	6.38911e-13	9.07881e-14
		15.35	9.269e-13	9.4696e-14	6.04661e-13	9.72098e-14	6.33779e-13	9.30929e-14
		15.36	9.20605e-13	9.30722e-14	6.07361e-13	9.14904e-14	6.3802e-13	9.26359e-14
		15.37	9.20213e-13	9.4896e-14	6.12571e-13	9.32389e-14	6.28219e-13	9.3315e-14
		15.38	9.2094e-13	9.61493e-14	6.06698e-13	9.55818e-14	6.33645e-13	9.36666e-14
		15.39	9.21085e-13	9.55641e-14	6.09215e-13	9.28535e-14	6.32102e-13	9.08615e-14
		15.4	9.20569e-13	9.38879e-14	5.99772e-13	9.44376e-14	6.39422e-13	8.70303e-14
		15.41	9.17061e-13	9.57648e-14	5.9955e-13	9.7241e-14	6.36142e-13	9.08559e-14
		15.42	9.18639e-13	9.55942e-14	5.95535e-13	9.98323e-14	6.3258e-13	9.34086e-14
		15.43	9.15758e-13	9.54838e-14	5.91426e-13	9.87044e-14	6.32181e-13	9.21581e-14
		15.44	9.13015e-13	9.58471e-14	5.9881e-13	9.62605e-14	6.27002e-13	9.82852e-14
		15.45	9.11403e-13	9.72659e-14	5.94697e-13	9.40463e-14	6.29142e-13	9.82267e-14
		15.46	9.09452e-13	9.65632e-14	5.9659e-13	9.33916e-14	6.26179e-13	9.57961e-14
		15.47	9.05378e-13	9.48511e-14	5.99887e-13	9.43858e-14	6.25043e-13	9.51084e-14
		15.48	9.06767e-13	9.46952e-14	5.96344e-13	9.39919e-14	6.18567e-13	9.758e-14
		15.49	9.03526e-13	9.56014e-14	5.92707e-13	9.79201e-14	6.2843e-13	8.99082e-14
		15.5	9.07996e-13	9.49761e-14	5.94521e-13	9.65783e-14	6.28498e-13	8.85096e-14
		15.51	9.1126e-13	9.49954e-14	5.908e-13	9.48982e-14	6.26849e-13	9.14561e-14
		15.52	9.08405e-13	9.54687e-14	5.95995e-13	9.30051e-14	6.25552e-13	9.34542e-14
		15.53	9.01974e-13	9.46749e-14	5.96324e-13	9.16481e-14	6.26799e-13	9.48754e-14
		15.54	9.04438e-13	9.27101e-14	5.96115e-13	9.44519e-14	6.21161e-13	9.53786e-14
		15.55	9.07396e-13	9.26326e-14	5.9421e-13	9.54016e-14	6.11788e-13	1.0004e-13
		15.56	9.07546e-13	9.19745e-14	5.92405e-13	9.22969e-14	6.20269e-13	9.36532e-14
		15.57	9.03491e-13	9.38134e-14	5.88684e-13	9.41044e-14	6.14817e-13	9.54066e-14
		15.58	9.04033e-13	9.25074e-14	5.95409e-13	9.2787e-14	6.24601e-13	8.67134e-14
		15.59	9.00522e-13	9.32095e-14	5.96897e-13	9.33711e-14	6.18325e-13	9.25802e-14
		15.6	8.98575e-13	9.43648e-14	6.02162e-13	8.91709e-14	6.21462e-13	9.12388e-14
		15.61	8.99121e-13	9.33572e-14	5.94669e-13	9.40781e-14	6.19708e-13	9.38817e-14
		15.62	8.99635e-13	9.58683e-14	5.92697e-13	9.45739e-14	6.18752e-13	9.05392e-14
		15.63	8.95301e-13	9.55873e-14	6.00039e-13	9.2656e-14	6.11572e-13	9.57829e-14
		15.64	8.94152e-13	9.26708e-14	5.96623e-13	9.05467e-14	6.16847e-13	9.13048e-14
		15.65	8.94177e-13	9.35702e-14	5.93111e-13	9.28391e-14	6.18225e-13	9.14505e-14
		15.66	8.9057e-13	9.29948e-14	5.88201e-13	9.48078e-14	6.11756e-13	9.55323e-14
		15.67	8.91392e-13	9.32306e-14	5.88771e-13	9.38999e-14	6.07365e-13	9.9255e-14
		15.68	8.95983e-13	9.25927e-14	5.91632e-13	9.02654e-14	6.08424e-13	9.72393e-14
		15.69	8.93926e-13	9.30434e-14	5.9399e-13	9.12908e-14	6.16847e-13	9.06915e-14
		15.7	8.89966e-13	9.25249e-14	5.98748e-13	9.30361e-14	6.16117e-13	9.06483e-14
		15.71	8.89947e-13	9.33805e-14	5.8916e-13	9.22741e-14	6.10537e-13	9.15111e-14
		15.72	8.88767e-13	9.38448e-14	5.83344e-13	9.44405e-14	6.05076e-13	9.60791e-14
		15.73	8.89181e-13	9.25686e-14	5.88431e-13	9.55776e-14	6.0332e-13	9.77698e-14
		15.74	8.86002e-13	9.37724e-14	5.94479e-13	8.59661e-14	6.16582e-13	9.1898e-14
		15.75	8.91419e-13	9.41087e-14	5.79882e-13	9.44991e-14	6.13627e-13	9.67687e-14
		15.76	8.84866e-13	9.41024e-14	5.83201e-13	8.97158e-14	6.10539e-13	9.30581e-14
		15.77	8.83811e-13	9.30033e-14	5.89017e-13	8.95176e-14	6.03732e-13	9.57712e-14
		15.78	8.81022e-13	9.34572e-14	5.86687e-13	9.0465e-14	6.09074e-13	9.3677e-14
		15.79	8.90492e-13	9.28853e-14	5.9487e-13	8.46389e-14	6.08019e-13	9.12818e-14
		15.8	8.90725e-13	9.3608e-14	5.88295e-13	8.94837e-14	6.08072e-13	8.97115e-14
		15.81	8.84617e-13	9.39471e-14	5.87712e-13	9.0201e-14	6.09476e-13	9.19816e-14
		15.82	8.77408e-13	9.40361e-14	5.93076e-13	8.86676e-14	6.09285e-13	9.08761e-14
		15.83	8.7842e-13	9.42386e-14	5.82979e-13	8.97901e-14	6.09965e-13	8.90699e-14
		15.84	8.78442e-13	9.26999e-14	5.90985e-13	9.07617e-14	6.00352e-13	9.38251e-14
		15.85	8.749e-13	9.35138e-14	5.73706e-13	9.29381e-14	6.08026e-13	8.56974e-14
		15.86	8.71721e-13	9.32217e-14	5.80262e-13	9.0211e-14	6.10901e-13	8.89218e-14
		15.87	8.77032e-13	9.32361e-14	5.84485e-13	8.8064e-14	6.00792e-13	9.62904e-14
		15.88	8.75638e-13	9.30697e-14	5.77144e-13	9.12116e-14	6.01629e-13	9.08363e-14
		15.89	8.77588e-13	9.17154e-14	5.83314e-13	8.65003e-14	6.00121e-13	9.20847e-14
		15.9	8.70577e-13	9.50718e-14	5.72297e-13	9.06157e-14	5.96607e-13	9.60452e-14
		15.91	8.69345e-13	9.51148e-14	5.79471e-13	8.86113e-14	5.95893e-13	9.57375e-14
		15.92	8.58654e-13	9.34467e-14	5.77841e-13	8.8656e-14	5.97508e-13	9.5049e-14
		15.93	8.69223e-13	9.45832e-14	5.74818e-13	9.19214e-14	5.95917e-13	9.33814e-14
		15.94	8.66325e-13	9.27755e-14	5.78885e-13	9.14047e-14	6.0073e-13	8.98095e-14
		15.95	8.6724e-13	9.20424e-14	5.75384e-13	9.11443e-14	6.00166e-13	9.36683e-14
		15.96	8.64165e-13	9.41281e-14	5.78368e-13	8.9449e-14	5.89915e-13	9.96469e-14
		15.97	8.58203e-13	9.26366e-14	5.75046e-13	8.87115e-14	5.96131e-13	9.14354e-14
		15.98	8.53902e-13	9.32014e-14	5.79667e-13	8.97362e-14	5.89576e-13	9.65116e-14
		15.99	8.51736e-13	9.44292e-14	5.68023e-13	9.6032e-14	5.94564e-13	9.23941e-14
		16	8.61433e-13	9.33724e-14	5.85068e-13	8.45515e-14	5.98143e-13	9.29767e-14
		16.01	8.55454e-13	9.37595e-14	5.73565e-13	9.0961e-14	5.90376e-13	1.00141e-13
		16.02	8.50624e-13	9.37479e-14	5.84505e-13	8.67405e-14	5.97348e-13	9.09328e-14
		16.03	8.58012e-13	9.50853e-14	5.84876e-13	8.65708e-14	6.00129e-13	8.85837e-14
		16.04	8.55813e-13	9.47244e-14	5.75925e-13	8.78158e-14	5.98722e-13	8.62858e-14
		16.05	8.50387e-13	9.49871e-14	5.70296e-13	9.16695e-14	5.8877e-13	9.3458e-14
		16.06	8.49702e-13	9.30802e-14	5.81221e-13	8.60553e-14	5.91395e-13	9.04136e-14
		16.07	8.52213e-13	9.26945e-14	5.72253e-13	9.22836e-14	5.89695e-13	9.13485e-14
		16.08	8.56337e-13	9.48893e-14	5.72609e-13	8.84193e-14	5.87092e-13	9.41472e-14
		16.09	8.51371e-13	9.27572e-14	5.7529e-13	8.84653e-14	5.84537e-13	9.42561e-14
		16.1	8.48612e-13	9.4992e-14	5.76726e-13	8.72348e-14	5.89337e-13	9.29518e-14
		16.11	8.49571e-13	9.23987e-14	5.74579e-13	8.8962e-14	5.87536e-13	8.95619e-14
		16.12	8.52653e-13	9.27658e-14	5.75648e-13	8.63622e-14	5.82388e-13	9.43445e-14
		16.13	8.50479e-13	9.18655e-14	5.75424e-13	8.54796e-14	5.83207e-13	9.77065e-14
		16.14	8.45476e-13	9.31753e-14	5.73503e-13	8.66207e-14	5.81504e-13	9.486e-14
		16.15	8.51454e-13	9.25526e-14	5.75534e-13	8.53913e-14	5.75541e-13	9.67308e-14
		16.16	8.47084e-13	9.27372e-14	5.73147e-13	8.48438e-14	5.80839e-13	9.51731e-14
		16.17	8.46042e-13	9.26017e-14	5.78045e-13	8.36418e-14	5.76488e-13	9.81128e-14
		16.18	8.38381e-13	9.09224e-14	5.69519e-13	8.67362e-14	5.7995e-13	9.25061e-14
		16.19	8.40965e-13	9.13845e-14	5.775e-13	8.30032e-14	5.75452e-13	9.58847e-14
		16.2	8.42409e-13	9.29256e-14	5.7314e-13	8.33988e-14	5.75314e-13	9.70887e-14
		16.21	8.38315e-13	9.22816e-14	5.62113e-13	8.89584e-14	5.83954e-13	8.82468e-14
		16.22	8.44414e-13	8.91101e-14	5.57507e-13	8.97356e-14	5.71118e-13	1.00207e-13
		16.23	8.43291e-13	8.96698e-14	5.57068e-13	9.23595e-14	5.83966e-13	9.48634e-14
		16.24	8.43325e-13	8.96935e-14	5.66741e-13	8.72949e-14	5.87405e-13	8.92409e-14
		16.25	8.4158e-13	8.9728e-14	5.65738e-13	8.49214e-14	5.84136e-13	8.79542e-14
		16.26	8.32257e-13	9.20945e-14	5.66712e-13	8.53639e-14	5.77803e-13	9.77983e-14
		16.27	8.37237e-13	9.12656e-14	5.60919e-13	8.59149e-14	5.76878e-13	9.5734e-14
		16.28	8.29888e-13	9.26345e-14	5.67047e-13	8.56431e-14	5.73212e-13	9.27602e-14
		16.29	8.36664e-13	8.98478e-14	5.70235e-13	8.34657e-14	5.78431e-13	8.86118e-14
		16.3	8.36192e-13	9.19498e-14	5.61531e-13	8.53937e-14	5.80839e-13	8.93994e-14
		16.31	8.31552e-13	9.21918e-14	5.67324e-13	8.51764e-14	5.76582e-13	9.01389e-14
		16.32	8.35251e-13	9.16867e-14	5.57837e-13	8.85089e-14	5.69362e-13	9.65315e-14
		16.33	8.32634e-13	9.07712e-14	5.57721e-13	8.82067e-14	5.75866e-13	9.21035e-14
		16.34	8.25769e-13	9.33762e-14	5.57435e-13	8.72804e-14	5.72712e-13	9.45104e-14
		16.35	8.28139e-13	9.26233e-14	5.66954e-13	8.22565e-14	5.6577e-13	9.84327e-14
		16.36	8.26628e-13	9.1162e-14	5.58342e-13	8.47115e-14	5.70005e-13	9.52727e-14
		16.37	8.29398e-13	9.23169e-14	5.62699e-13	8.35236e-14	5.58586e-13	1.06003e-13
		16.38	8.22175e-13	9.39646e-14	5.73057e-13	8.09321e-14	5.6818e-13	9.49852e-14
		16.39	8.25438e-13	9.2364e-14	5.64441e-13	8.27827e-14	5.69779e-13	9.06442e-14
		16.4	8.32798e-13	9.11069e-14	5.59038e-13	8.47496e-14	5.66938e-13	9.68308e-14
		16.41	8.2217e-13	9.18832e-14	5.65678e-13	8.20697e-14	5.67149e-13	9.68786e-14
		16.42	8.29061e-13	9.21189e-14	5.61117e-13	8.17848e-14	5.59868e-13	9.70642e-14
		16.43	8.3033e-13	9.2584e-14	5.65284e-13	8.25632e-14	5.61099e-13	9.83272e-14
		16.44	8.24676e-13	9.11589e-14	5.50531e-13	8.61827e-14	5.67119e-13	8.96873e-14
		16.45	8.29887e-13	9.22906e-14	5.49988e-13	8.75439e-14	5.59694e-13	9.15393e-14
		16.46	8.2677e-13	9.15791e-14	5.59134e-13	8.47672e-14	5.60981e-13	9.50386e-14
		16.47	8.24572e-13	9.3279e-14	5.53916e-13	8.4828e-14	5.57476e-13	9.46661e-14
		16.48	8.122e-13	9.25164e-14	5.60215e-13	8.36062e-14	5.54286e-13	9.38586e-14
		16.49	8.18713e-13	9.40371e-14	5.61009e-13	8.24092e-14	5.53305e-13	9.48312e-14
		16.5	8.21245e-13	9.23699e-14	5.5389e-13	8.38057e-14	5.5853e-13	9.22948e-14
		16.51	8.191e-13	9.24127e-14	5.60831e-13	8.43916e-14	5.55829e-13	9.58201e-14
		16.52	8.21879e-13	9.31418e-14	5.49008e-13	8.63529e-14	5.56406e-13	9.42715e-14
		16.53	8.16787e-13	9.2672e-14	5.53613e-13	8.42114e-14	5.45056e-13	1.00425e-13
		16.54	8.16741e-13	9.19981e-14	5.55417e-13	8.24038e-14	5.50277e-13	9.55027e-14
		16.55	8.1655e-13	9.34134e-14	5.53503e-13	8.3921e-14	5.52985e-13	9.34802e-14
		16.56	8.17535e-13	9.13311e-14	5.49003e-13	8.52835e-14	5.51432e-13	9.25259e-14
		16.57	8.12629e-13	9.20609e-14	5.48486e-13	8.47802e-14	5.53618e-13	9.34425e-14
		16.58	8.12766e-13	9.1917e-14	5.49478e-13	8.2957e-14	5.48621e-13	9.67281e-14
		16.59	8.11407e-13	9.11673e-14	5.50362e-13	8.43546e-14	5.46452e-13	9.56492e-14
		16.6	8.12587e-13	9.04432e-14	5.47738e-13	8.51218e-14	5.53818e-13	9.23327e-14
		16.61	8.16832e-13	9.11889e-14	5.49017e-13	8.60175e-14	5.4544e-13	9.48147e-14
		16.62	8.09628e-13	9.06727e-14	5.54504e-13	8.05276e-14	5.45931e-13	9.61193e-14
		16.63	8.16301e-13	9.21322e-14	5.57022e-13	8.11617e-14	5.52725e-13	8.71429e-14
		16.64	8.14931e-13	9.14489e-14	5.4705e-13	8.5657e-14	5.56253e-13	8.9551e-14
		16.65	8.12047e-13	9.10028e-14	5.41714e-13	8.63902e-14	5.4437e-13	9.67651e-14
		16.66	8.10981e-13	9.26602e-14	5.40384e-13	8.88341e-14	5.49129e-13	9.24748e-14
		16.67	8.1217e-13	9.22463e-14	5.46623e-13	8.32512e-14	5.44195e-13	9.38864e-14
		16.68	8.09544e-13	9.10025e-14	5.45863e-13	8.51247e-14	5.41793e-13	9.14666e-14
		16.69	8.08367e-13	9.26812e-14	5.47366e-13	8.45358e-14	5.51342e-13	8.35201e-14
		16.7	8.1206e-13	9.26098e-14	5.44604e-13	8.38913e-14	5.44594e-13	9.17254e-14
		16.71	8.11367e-13	9.48986e-14	5.43324e-13	8.00706e-14	5.4762e-13	8.55013e-14
		16.72	8.10908e-13	9.24586e-14	5.37805e-13	8.39166e-14	5.42832e-13	9.33217e-14
		16.73	8.08715e-13	9.1314e-14	5.36381e-13	8.28688e-14	5.38058e-13	9.03133e-14
		16.74	8.06064e-13	9.39939e-14	5.42723e-13	8.27002e-14	5.40472e-13	9.39e-14
		16.75	8.08806e-13	9.22914e-14	5.47013e-13	8.03547e-14	5.4391e-13	9.05288e-14
		16.76	8.03369e-13	9.12384e-14	5.48832e-13	8.17644e-14	5.35159e-13	9.09645e-14
		16.77	8.01041e-13	9.01276e-14	5.53883e-13	7.81606e-14	5.33108e-13	9.43948e-14
		16.78	8.01143e-13	8.92378e-14	5.43555e-13	8.27719e-14	5.3574e-13	9.24398e-14
		16.79	8.04847e-13	9.04649e-14	5.38906e-13	8.44074e-14	5.35821e-13	9.01958e-14
		16.8	8.04213e-13	8.83781e-14	5.41386e-13	8.27666e-14	5.32744e-13	9.14118e-14
		16.81	8.01167e-13	9.07134e-14	5.49726e-13	8.05742e-14	5.35903e-13	8.75853e-14
		16.82	8.05083e-13	8.87667e-14	5.453e-13	7.82123e-14	5.3384e-13	9.29966e-14
		16.83	7.99636e-13	9.04927e-14	5.529e-13	7.85474e-14	5.29871e-13	9.3536e-14
		16.84	7.97637e-13	8.91071e-14	5.46309e-13	8.17217e-14	5.31068e-13	9.76259e-14
		16.85	7.96274e-13	8.99219e-14	5.46793e-13	7.97816e-14	5.31455e-13	8.56184e-14
		16.86	7.91104e-13	9.19987e-14	5.50755e-13	7.89992e-14	5.29002e-13	8.36902e-14
		16.87	7.94446e-13	9.12179e-14	5.38317e-13	8.02749e-14	5.25709e-13	9.18136e-14
		16.88	7.9731e-13	8.90588e-14	5.34122e-13	8.30276e-14	5.29608e-13	8.9419e-14
		16.89	7.96169e-13	9.07077e-14	5.26725e-13	8.54109e-14	5.40918e-13	8.37245e-14
		16.9	7.9598e-13	8.94012e-14	5.38785e-13	8.32592e-14	5.33403e-13	8.27729e-14
		16.91	7.93042e-13	9.03752e-14	5.4652e-13	7.74306e-14	5.31305e-13	8.67758e-14
		16.92	7.87577e-13	9.22118e-14	5.28314e-13	8.38749e-14	5.29494e-13	8.8427e-14
		16.93	7.91081e-13	8.92325e-14	5.40091e-13	8.02976e-14	5.28448e-13	8.72065e-14
		16.94	7.87988e-13	8.84982e-14	5.35083e-13	7.86906e-14	5.30939e-13	8.6092e-14
		16.95	7.84005e-13	9.08048e-14	5.37056e-13	7.86059e-14	5.24829e-13	9.35399e-14
		16.96	7.89203e-13	8.99117e-14	5.41096e-13	8.08348e-14	5.26046e-13	9.08403e-14
		16.97	7.91725e-13	8.90173e-14	5.39047e-13	8.1437e-14	5.25594e-13	8.78535e-14
		16.98	7.90174e-13	8.83725e-14	5.30985e-13	8.29245e-14	5.19632e-13	9.83762e-14
		16.99	7.8626e-13	8.85692e-14	5.37514e-13	8.15691e-14	5.22404e-13	8.92914e-14
		17	7.90463e-13	8.77796e-14	5.40012e-13	8.04358e-14	5.26118e-13	8.45875e-14
		17.01	7.84015e-13	8.79504e-14	5.38546e-13	8.09419e-14	5.23435e-13	8.33381e-14
		17.02	7.86983e-13	8.94127e-14	5.3476e-13	8.0684e-14	5.21412e-13	9.1385e-14
		17.03	7.90419e-13	8.77509e-14	5.32823e-13	8.00313e-14	5.25274e-13	8.80812e-14
		17.04	7.84818e-13	8.58724e-14	5.41741e-13	8.05325e-14	5.19022e-13	9.08325e-14
		17.05	7.82567e-13	8.72225e-14	5.3441e-13	7.78268e-14	5.18889e-13	8.90665e-14
		17.06	7.82546e-13	8.80178e-14	5.32068e-13	8.19006e-14	5.17121e-13	9.03305e-14
		17.07	7.84163e-13	8.84853e-14	5.28138e-13	8.33528e-14	5.15677e-13	9.17348e-14
		17.08	7.8458e-13	8.67718e-14	5.3423e-13	8.05758e-14	5.17912e-13	8.88684e-14
		17.09	7.78211e-13	8.82786e-14	5.31786e-13	7.90672e-14	5.19277e-13	8.91232e-14
		17.1	7.80359e-13	8.61858e-14	5.30281e-13	8.33562e-14	5.1474e-13	9.07694e-14
		17.11	7.8204e-13	8.62833e-14	5.27633e-13	8.08656e-14	5.15222e-13	9.27936e-14
		17.12	7.77489e-13	8.82091e-14	5.32298e-13	8.22441e-14	5.12554e-13	9.40487e-14
		17.13	7.77542e-13	8.64622e-14	5.24543e-13	7.7614e-14	5.12355e-13	9.43574e-14
		17.14	7.74695e-13	8.72171e-14	5.28854e-13	8.07759e-14	5.16408e-13	9.26881e-14
		17.15	7.72938e-13	8.52204e-14	5.37697e-13	7.89531e-14	5.16647e-13	9.03908e-14
		17.16	7.77708e-13	8.58813e-14	5.29857e-13	8.00199e-14	5.22e-13	8.67487e-14
		17.17	7.75273e-13	8.56147e-14	5.33654e-13	7.96802e-14	5.10085e-13	9.24571e-14
		17.18	7.77088e-13	8.53109e-14	5.31354e-13	7.85587e-14	5.22336e-13	8.7167e-14
		17.19	7.72697e-13	8.50787e-14	5.33694e-13	7.81842e-14	5.11529e-13	9.09195e-14
		17.2	7.70566e-13	8.54696e-14	5.39311e-13	7.46748e-14	5.11547e-13	9.54818e-14
		17.21	7.69167e-13	8.47119e-14	5.29162e-13	7.83226e-14	5.08151e-13	9.6303e-14
		17.22	7.75262e-13	8.39873e-14	5.27961e-13	8.00735e-14	5.13975e-13	9.28607e-14
		17.23	7.68534e-13	8.40336e-14	5.18605e-13	8.38769e-14	5.21762e-13	8.84146e-14
		17.24	7.71108e-13	8.4254e-14	5.25953e-13	7.95784e-14	5.12724e-13	9.5005e-14
		17.25	7.66391e-13	8.43113e-14	5.28514e-13	8.12576e-14	5.10761e-13	9.76984e-14
		17.26	7.61422e-13	8.46026e-14	5.294e-13	7.83454e-14	5.07331e-13	9.27697e-14
		17.27	7.6717e-13	8.54714e-14	5.24338e-13	8.12563e-14	5.14543e-13	8.75231e-14
		17.28	7.71643e-13	8.54027e-14	5.27827e-13	8.06667e-14	5.14364e-13	8.79496e-14
		17.29	7.68623e-13	8.6367e-14	5.23403e-13	8.05654e-14	5.07903e-13	9.2854e-14
		17.3	7.63156e-13	8.66787e-14	5.28048e-13	8.00765e-14	5.04634e-13	9.48888e-14
		17.31	7.66721e-13	8.57811e-14	5.2612e-13	7.98244e-14	5.02522e-13	9.53079e-14
		17.32	7.6311e-13	8.52204e-14	5.29948e-13	7.81221e-14	5.00354e-13	9.24558e-14
		17.33	7.638e-13	8.19898e-14	5.24023e-13	7.799e-14	5.06745e-13	9.25558e-14
		17.34	7.63777e-13	8.40918e-14	5.25592e-13	7.72094e-14	5.03035e-13	9.26541e-14
		17.35	7.63522e-13	8.60459e-14	5.17299e-13	7.94858e-14	5.0351e-13	9.05279e-14
		17.36	7.62072e-13	8.75629e-14	5.18283e-13	8.19773e-14	5.03062e-13	9.21608e-14
		17.37	7.62125e-13	8.6169e-14	5.24074e-13	7.81895e-14	5.04986e-13	9.01601e-14
		17.38	7.55375e-13	8.61792e-14	5.17316e-13	8.11146e-14	5.04098e-13	8.77174e-14
		17.39	7.62106e-13	8.7101e-14	5.28421e-13	7.69003e-14	4.97507e-13	9.43031e-14
		17.4	7.58709e-13	8.60411e-14	5.2819e-13	7.60315e-14	5.00321e-13	9.21312e-14
		17.41	7.56614e-13	8.73069e-14	5.26903e-13	7.73197e-14	5.01333e-13	9.15637e-14
		17.42	7.57985e-13	8.83522e-14	5.22163e-13	7.73168e-14	5.00978e-13	9.04387e-14
		17.43	7.59191e-13	8.77142e-14	5.25805e-13	7.64451e-14	5.05764e-13	8.19739e-14
		17.44	7.59712e-13	8.54445e-14	5.30505e-13	7.99437e-14	5.02815e-13	8.67606e-14
		17.45	7.55137e-13	8.63644e-14	5.22981e-13	7.56458e-14	5.05946e-13	8.42061e-14
		17.46	7.58514e-13	8.69398e-14	5.26957e-13	7.7406e-14	4.96019e-13	9.27097e-14
		17.47	7.54285e-13	8.61174e-14	5.20766e-13	7.76003e-14	4.98668e-13	9.0381e-14
		17.48	7.57704e-13	8.68687e-14	5.24924e-13	7.48344e-14	5.01475e-13	8.86403e-14
		17.49	7.53509e-13	8.56862e-14	5.31948e-13	7.55895e-14	5.02071e-13	8.87021e-14
		17.5	7.53942e-13	8.75193e-14	5.18124e-13	7.99183e-14	4.96705e-13	8.97588e-14
		17.51	7.56076e-13	8.65906e-14	5.32742e-13	7.52659e-14	5.00241e-13	8.25297e-14
		17.52	7.51452e-13	8.81561e-14	5.22163e-13	7.81049e-14	5.01567e-13	9.08338e-14
		17.53	7.54265e-13	8.83376e-14	5.2384e-13	7.43472e-14	4.90176e-13	9.20697e-14
		17.54	7.57481e-13	8.60201e-14	5.2442e-13	7.86345e-14	4.88321e-13	9.53674e-14
		17.55	7.51509e-13	8.78505e-14	5.20848e-13	7.76752e-14	4.90083e-13	9.30931e-14
		17.56	7.53174e-13	8.73065e-14	5.21776e-13	7.60916e-14	4.96003e-13	8.01365e-14
		17.57	7.52603e-13	8.67769e-14	5.23131e-13	7.75036e-14	4.95267e-13	8.77234e-14
		17.58	7.52131e-13	8.49376e-14	5.20808e-13	7.71127e-14	4.88346e-13	9.06974e-14
		17.59	7.51711e-13	8.68516e-14	5.17202e-13	7.69035e-14	4.92706e-13	9.35307e-14
		17.6	7.50613e-13	8.83849e-14	5.16001e-13	7.80924e-14	4.96088e-13	8.85393e-14
		17.61	7.43189e-13	8.76829e-14	5.20436e-13	7.60204e-14	4.93281e-13	8.94624e-14
		17.62	7.43705e-13	8.65667e-14	5.17417e-13	7.95313e-14	4.97654e-13	8.29441e-14
		17.63	7.44568e-13	8.88378e-14	5.16923e-13	7.84419e-14	4.94612e-13	8.57074e-14
		17.64	7.45973e-13	8.90627e-14	5.26003e-13	7.53204e-14	4.82176e-13	9.43143e-14
		17.65	7.4599e-13	8.66788e-14	5.07103e-13	8.07419e-14	4.94785e-13	8.57389e-14
		17.66	7.40845e-13	8.71777e-14	5.18011e-13	7.90808e-14	4.87201e-13	9.38232e-14
		17.67	7.38564e-13	8.56789e-14	5.10059e-13	7.54642e-14	4.8584e-13	9.38321e-14
		17.68	7.42054e-13	8.66624e-14	5.17741e-13	7.67996e-14	4.93387e-13	8.53918e-14
		17.69	7.42537e-13	8.53648e-14	5.23404e-13	7.46859e-14	4.8603e-13	9.54061e-14
		17.7	7.4224e-13	8.56841e-14	5.20457e-13	7.56762e-14	4.91759e-13	9.12436e-14
		17.71	7.45799e-13	8.57587e-14	5.15304e-13	7.80021e-14	4.88638e-13	9.12826e-14
		17.72	7.40502e-13	8.65371e-14	5.10116e-13	7.68874e-14	4.91755e-13	8.74276e-14
		17.73	7.3975e-13	8.42483e-14	5.22374e-13	7.6811e-14	4.90896e-13	8.71889e-14
		17.74	7.36192e-13	8.45236e-14	5.06862e-13	7.83069e-14	4.8555e-13	9.37444e-14
		17.75	7.35753e-13	8.58162e-14	5.13819e-13	7.47906e-14	4.8739e-13	8.76629e-14
		17.76	7.36155e-13	8.54562e-14	5.08347e-13	7.63818e-14	4.81915e-13	9.38277e-14
		17.77	7.36332e-13	8.65448e-14	5.06109e-13	8.00272e-14	4.84014e-13	9.23454e-14
		17.78	7.37275e-13	8.4813e-14	5.14307e-13	7.92227e-14	4.80276e-13	9.06864e-14
		17.79	7.36707e-13	8.49206e-14	5.21475e-13	7.33014e-14	4.86618e-13	8.56758e-14
		17.8	7.38052e-13	8.71165e-14	5.0812e-13	7.57343e-14	4.88146e-13	8.60347e-14
		17.81	7.31756e-13	8.57479e-14	5.05786e-13	7.59409e-14	4.82957e-13	9.22321e-14
		17.82	7.30052e-13	8.37097e-14	5.1822e-13	7.65253e-14	4.87363e-13	8.64731e-14
		17.83	7.30043e-13	8.54175e-14	5.12978e-13	7.71769e-14	4.84869e-13	8.63115e-14
		17.84	7.36645e-13	8.53253e-14	5.15057e-13	7.45947e-14	4.90621e-13	8.20221e-14
		17.85	7.34223e-13	8.42057e-14	5.18616e-13	7.54224e-14	4.87199e-13	8.56961e-14
		17.86	7.3442e-13	8.51267e-14	5.19218e-13	7.4314e-14	4.83698e-13	8.55006e-14
		17.87	7.28877e-13	8.34896e-14	5.05898e-13	7.78731e-14	4.82144e-13	8.5372e-14
		17.88	7.30561e-13	8.49182e-14	5.18061e-13	7.39444e-14	4.89421e-13	8.35825e-14
		17.89	7.31259e-13	8.61908e-14	5.2009e-13	7.38855e-14	4.88707e-13	8.07176e-14
		17.9	7.2743e-13	8.51616e-14	5.12672e-13	6.95746e-14	4.87641e-13	8.03955e-14
		17.91	7.26771e-13	8.3645e-14	5.12536e-13	7.50703e-14	4.83684e-13	8.61208e-14
		17.92	7.29749e-13	8.43171e-14	5.16717e-13	7.29857e-14	4.88385e-13	8.38181e-14
		17.93	7.31984e-13	8.54471e-14	5.20968e-13	7.44548e-14	4.81599e-13	8.21401e-14
		17.94	7.27866e-13	8.34285e-14	5.15093e-13	7.34464e-14	4.91167e-13	7.87913e-14
		17.95	7.23063e-13	8.27242e-14	5.15007e-13	7.16838e-14	4.82037e-13	8.63397e-14
		17.96	7.28209e-13	8.69765e-14	5.09601e-13	7.19548e-14	4.81812e-13	8.66865e-14
		17.97	7.21997e-13	8.53116e-14	5.13362e-13	7.2507e-14	4.85087e-13	8.32883e-14
		17.98	7.28416e-13	8.40091e-14	5.16071e-13	7.23534e-14	4.85705e-13	8.08424e-14
		17.99	7.2363e-13	8.41049e-14	5.11255e-13	7.55637e-14	4.88157e-13	7.33875e-14
		18	7.26383e-13	8.49298e-14	5.19377e-13	7.00743e-14	4.87953e-13	7.86547e-14
		18.01	7.24212e-13	8.43201e-14	5.19666e-13	7.19067e-14	4.90675e-13	7.96151e-14
		18.02	7.21899e-13	8.78556e-14	5.1289e-13	7.17519e-14	4.81901e-13	8.11718e-14
		18.03	7.22802e-13	8.54082e-14	5.15683e-13	7.46277e-14	4.81585e-13	8.19444e-14
		18.04	7.16621e-13	8.49228e-14	5.09804e-13	7.3999e-14	4.80582e-13	8.43469e-14
		18.05	7.22432e-13	8.57863e-14	5.1326e-13	7.29291e-14	4.77598e-13	8.19989e-14
		18.06	7.1436e-13	8.52553e-14	5.06093e-13	7.24368e-14	4.77989e-13	7.87667e-14
		18.07	7.16876e-13	8.28495e-14	5.1069e-13	7.22456e-14	4.92375e-13	7.20474e-14
		18.08	7.20064e-13	8.33331e-14	5.14993e-13	7.33754e-14	4.90968e-13	7.55526e-14
		18.09	7.21106e-13	8.21721e-14	5.10596e-13	7.22411e-14	4.84746e-13	7.97327e-14
		18.1	7.21436e-13	8.19427e-14	5.05895e-13	7.40186e-14	4.69879e-13	8.87726e-14
		18.11	7.16707e-13	8.46937e-14	5.13916e-13	6.88337e-14	4.74204e-13	8.57113e-14
		18.12	7.19954e-13	8.2562e-14	5.11132e-13	7.23667e-14	4.7607e-13	8.57415e-14
		18.13	7.16015e-13	8.34729e-14	5.15457e-13	7.16498e-14	4.70358e-13	8.57618e-14
		18.14	7.15454e-13	8.44722e-14	5.09214e-13	7.58454e-14	4.74044e-13	8.6363e-14
		18.15	7.18688e-13	8.53678e-14	5.09728e-13	7.35386e-14	4.76e-13	8.02594e-14
		18.16	7.19202e-13	8.45537e-14	5.14985e-13	7.08334e-14	4.81513e-13	7.70034e-14
		18.17	7.14596e-13	8.64819e-14	5.11213e-13	6.97816e-14	4.83009e-13	7.39405e-14
		18.18	7.08325e-13	8.69342e-14	5.06157e-13	7.14641e-14	4.86093e-13	6.85568e-14
		18.19	7.0987e-13	8.43533e-14	5.03733e-13	7.4101e-14	4.78501e-13	7.97317e-14
		18.2	7.08575e-13	8.36929e-14	5.02951e-13	7.22107e-14	4.75412e-13	7.9727e-14
		18.21	7.13095e-13	8.44509e-14	5.07342e-13	7.40868e-14	4.72737e-13	8.2083e-14
		18.22	7.0522e-13	8.53997e-14	5.02049e-13	7.49313e-14	4.67698e-13	8.30317e-14
		18.23	7.09728e-13	8.44879e-14	5.14471e-13	7.1034e-14	4.85774e-13	7.28467e-14
		18.24	7.09358e-13	8.47786e-14	5.10998e-13	6.96439e-14	4.7305e-13	7.99223e-14
		18.25	7.14992e-13	8.45238e-14	5.06388e-13	7.38464e-14	4.67786e-13	8.38112e-14
		18.26	7.17103e-13	8.49984e-14	5.04607e-13	7.39597e-14	4.68503e-13	8.22433e-14
		18.27	7.10292e-13	8.48978e-14	5.10417e-13	7.12864e-14	4.76218e-13	7.1256e-14
		18.28	7.1124e-13	8.43567e-14	5.02723e-13	7.24001e-14	4.82144e-13	7.26708e-14
		18.29	7.08356e-13	8.49063e-14	5.02326e-13	7.39414e-14	4.79034e-13	7.10629e-14
		18.3	7.079e-13	8.27315e-14	5.14892e-13	6.96428e-14	4.76438e-13	7.61725e-14
		18.31	7.0601e-13	8.58837e-14	5.02743e-13	7.28849e-14	4.75265e-13	7.70559e-14
[truncated: 7,285 more rows]
