# Supplementary material for: Physiological roles of endocytosis and presynaptic scaffold in vesicle replenishment at fast and slow central synapses
Source: eLife. 2024 Jun 3;12:RP90497. doi: 10.7554/eLife.90497 (PMC11147502; doi:10.7554/eLife.90497)
Supplement: Figure 2—figure supplement 2—source data 1. [file elife-90497-fig2-figsupp2-data1.xlsx]

## Sheet: 10 Hz data, Panel A
		Panel A_superimposed EPSC traces				Panel A_sample EPSC traces					Panel A_normalized EPSC amplitude vs stimulation (#)								Panel A_average depression at EPSCs (#26-30)
		Time (s)	Ctrl	Kyn		Time (s)	Kyn	Kyn + Dyn	Kyn + Ptp-2		Stimulation (#)	Kyn		Kyn + Dyn		Kyn + Ptp-2				Kyn	Kyn + Dyn	Kyn + Ptp-2
												Mean	SEM	Mean	SEM	Mean	SEM		Mean	0.466	0.371	0.413
		0	-1.36033e-10	-2.78931e-10		0	-5.61605e-12	-7.18855e-10	-1.09825e-10		1	1	0	1	0	1	0		SEM	0.016	0.02	0.014
		2e-05	-1.37593e-10	-2.78619e-10		2e-05	-5.30405e-12	-7.19479e-10	-1.08577e-10		2	0.789789	0.0199994	0.744451	0.0234131	0.732212	0.045247		n number	6	6	7
		4e-05	-1.38841e-10	-2.77371e-10		4e-05	-4.68004e-12	-7.20727e-10	-1.12321e-10		3	0.764149	0.0255639	0.612326	0.0235488	0.584364	0.0394594		p-value	--	0.004	0.052
		6e-05	-1.41337e-10	-2.77371e-10		6e-05	-3.74404e-12	-7.20727e-10	-1.12945e-10		4	0.560831	0.0267074	0.572941	0.0181535	0.483254	0.0364136
		8e-05	-1.41025e-10	-2.75187e-10		8e-05	-2.49602e-12	-7.20103e-10	-1.14817e-10		5	0.570145	0.0374146	0.477852	0.0336345	0.501176	0.0283929
		0.0001	-1.40089e-10	-2.76123e-10		0.0001	-9.36009e-13	-7.21351e-10	-1.14817e-10		6	0.546293	0.0347749	0.44868	0.0244413	0.423148	0.0205092
		0.00012	-1.37593e-10	-2.77371e-10		0.00012	-1.24801e-12	-7.21975e-10	-1.12321e-10		7	0.503942	0.0100027	0.407514	0.0194636	0.442801	0.0182865
		0.00014	-1.35409e-10	-2.78931e-10		0.00014	-1.87202e-12	-7.21351e-10	-1.11697e-10		8	0.500335	0.0403175	0.427465	0.025811	0.426335	0.0332827
		0.00016	-1.34785e-10	-2.80179e-10		0.00016	-3.74404e-12	-7.18231e-10	-1.11697e-10		9	0.498357	0.0507103	0.40231	0.0193204	0.455506	0.0222392
		0.00018	-1.35097e-10	-2.78619e-10		0.00018	-5.30405e-12	-7.19479e-10	-1.13569e-10		10	0.479378	0.0249919	0.37111	0.034125	0.431685	0.0230359
		0.0002	-1.35721e-10	-2.77995e-10		0.0002	-5.61605e-12	-7.18855e-10	-1.13569e-10		11	0.462771	0.0200656	0.358214	0.0362935	0.42859	0.0176692
		0.00022	-1.37905e-10	-2.75187e-10		0.00022	-5.61605e-12	-7.20103e-10	-1.13569e-10		12	0.468047	0.0222562	0.369418	0.0174849	0.407084	0.0177941
		0.00024	-1.38217e-10	-2.73627e-10		0.00024	-5.92806e-12	-7.20727e-10	-1.13569e-10		13	0.44168	0.0261905	0.38037	0.0191982	0.434032	0.0134204
		0.00026	-1.37905e-10	-2.72691e-10		0.00026	-4.99205e-12	-7.21351e-10	-1.15441e-10		14	0.454788	0.027263	0.389978	0.0129893	0.392966	0.0164968
		0.00028	-1.38217e-10	-2.73627e-10		0.00028	-4.99205e-12	-7.21975e-10	-1.14193e-10		15	0.445526	0.0185301	0.359912	0.0251762	0.426994	0.031786
		0.0003	-1.36969e-10	-2.74875e-10		0.0003	-4.68004e-12	-7.19479e-10	-1.15441e-10		16	0.4248	0.0174253	0.377097	0.0357812	0.399224	0.0221225
		0.00032	-1.35721e-10	-2.77371e-10		0.00032	-4.36804e-12	-7.18231e-10	-1.13569e-10		17	0.469403	0.0235908	0.361071	0.0308686	0.435841	0.0202266
		0.00034	-1.37281e-10	-2.78307e-10		0.00034	-3.43203e-12	-7.18855e-10	-1.12945e-10		18	0.462456	0.0189196	0.380136	0.0243503	0.398715	0.026529
		0.00036	-1.38841e-10	-2.79867e-10		0.00036	-3.74404e-12	-7.17607e-10	-1.14193e-10		19	0.480115	0.0179928	0.380996	0.0197993	0.395904	0.0242221
		0.00038	-1.40401e-10	-2.79555e-10		0.00038	-3.12003e-12	-7.19479e-10	-1.14817e-10		20	0.455025	0.0222072	0.408209	0.0316783	0.390704	0.0206937
		0.0004	-1.41337e-10	-2.78931e-10		0.0004	-5.92806e-12	-7.18855e-10	-1.16065e-10		21	0.45459	0.0165755	0.327476	0.0177801	0.444494	0.0120718
		0.00042	-1.42897e-10	-2.78931e-10		0.00042	-6.24006e-12	-7.19479e-10	-1.17313e-10		22	0.490475	0.0425835	0.350448	0.030353	0.419046	0.0222762
		0.00044	-1.42897e-10	-2.78931e-10		0.00044	-7.17607e-12	-7.18855e-10	-1.14193e-10		23	0.426961	0.0327078	0.388503	0.0241487	0.421897	0.016669
		0.00046	-1.41649e-10	-2.77683e-10		0.00046	-6.24006e-12	-7.18855e-10	-1.14193e-10		24	0.437727	0.0255691	0.370295	0.0088189	0.417782	0.0178965
		0.00048	-1.40089e-10	-2.77683e-10		0.00048	-4.68004e-12	-7.17607e-10	-1.14193e-10		25	0.474901	0.0320105	0.394191	0.0104366	0.42061	0.00937907
		0.0005	-1.38841e-10	-2.77059e-10		0.0005	-4.68004e-12	-7.19479e-10	-1.13569e-10		26	0.514115	0.0421858	0.373267	0.0202969	0.424704	0.0152952
		0.00052	-1.37593e-10	-2.77683e-10		0.00052	-3.74404e-12	-7.18231e-10	-1.13569e-10		27	0.479972	0.0431216	0.375923	0.027514	0.413392	0.0295479
		0.00054	-1.37593e-10	-2.77371e-10		0.00054	-3.43203e-12	-7.17607e-10	-1.12321e-10		28	0.438465	0.0303935	0.367798	0.0239713	0.422496	0.0139957
		0.00056	-1.37905e-10	-2.78619e-10		0.00056	-3.74404e-12	-7.17607e-10	-1.12321e-10		29	0.434673	0.0120473	0.361123	0.025573	0.41487	0.00913946
		0.00058	-1.39153e-10	-2.78307e-10		0.00058	-4.05604e-12	-7.17607e-10	-1.13569e-10		30	0.452381	0.0263012	0.376947	0.0261574	0.424974	0.0186769
		0.0006	-1.40089e-10	-2.79555e-10		0.0006	-4.68004e-12	-7.17607e-10	-1.14193e-10
		0.00062	-1.40713e-10	-2.81115e-10		0.00062	-4.36804e-12	-7.17607e-10	-1.12945e-10
		0.00064	-1.41025e-10	-2.82987e-10		0.00064	-4.36804e-12	-7.17607e-10	-1.14193e-10
		0.00066	-1.40089e-10	-2.84547e-10		0.00066	-4.36804e-12	-7.16983e-10	-1.12945e-10
		0.00068	-1.38841e-10	-2.84859e-10		0.00068	-4.36804e-12	-7.16983e-10	-1.11697e-10
		0.0007	-1.38217e-10	-2.84859e-10		0.0007	-4.99205e-12	-7.15735e-10	-1.12321e-10
		0.00072	-1.37593e-10	-2.82675e-10		0.00072	-5.30405e-12	-7.16983e-10	-1.12945e-10
		0.00074	-1.36657e-10	-2.81427e-10		0.00074	-4.99205e-12	-7.18231e-10	-1.13569e-10
		0.00076	-1.35409e-10	-2.79555e-10		0.00076	-4.05604e-12	-7.19479e-10	-1.14817e-10
		0.00078	-1.32913e-10	-2.78307e-10		0.00078	-3.43203e-12	-7.18855e-10	-1.14193e-10
		0.0008	-1.32601e-10	-2.78307e-10		0.0008	-3.74404e-12	-7.18855e-10	-1.14193e-10
		0.00082	-1.31353e-10	-2.77995e-10		0.00082	-3.12003e-12	-7.18855e-10	-1.14193e-10
		0.00084	-1.31665e-10	-2.77371e-10		0.00084	-4.36804e-12	-7.17607e-10	-1.13569e-10
		0.00086	-1.31041e-10	-2.77683e-10		0.00086	-4.99205e-12	-7.15735e-10	-1.12321e-10
		0.00088	-1.32601e-10	-2.78619e-10		0.00088	-5.61605e-12	-7.17607e-10	-1.12945e-10
		0.0009	-1.32601e-10	-2.80179e-10		0.0009	-6.24006e-12	-7.18231e-10	-1.13569e-10
		0.00092	-1.33849e-10	-2.81427e-10		0.00092	-6.55206e-12	-7.17607e-10	-1.13569e-10
		0.00094	-1.32601e-10	-2.82363e-10		0.00094	-5.30405e-12	-7.18231e-10	-1.13569e-10
		0.00096	-1.31977e-10	-2.84235e-10		0.00096	-5.30405e-12	-7.17607e-10	-1.10449e-10
		0.00098	-1.32601e-10	-2.85795e-10		0.00098	-4.36804e-12	-7.16359e-10	-1.09825e-10
		0.001	-1.31977e-10	-2.86107e-10		0.001	-3.12003e-12	-7.17607e-10	-1.09825e-10
		0.00102	-1.30105e-10	-2.86107e-10		0.00102	-2.18402e-12	-7.17607e-10	-1.11073e-10
		0.00104	-1.30105e-10	-2.85483e-10		0.00104	-1.24801e-12	-7.16983e-10	-1.12321e-10
		0.00106	-1.30417e-10	-2.84235e-10		0.00106	-1.24801e-12	-7.18855e-10	-1.14193e-10
		0.00108	-1.32289e-10	-2.83299e-10		0.00108	-1.56001e-12	-7.19479e-10	-1.15441e-10
		0.0011	-1.34161e-10	-2.82675e-10		0.0011	-1.24801e-12	-7.22599e-10	-1.14817e-10
		0.00112	-1.34473e-10	-2.82363e-10		0.00112	-2.18402e-12	-7.21351e-10	-1.14817e-10
		0.00114	-1.36345e-10	-2.80803e-10		0.00114	-2.18402e-12	-7.23223e-10	-1.14817e-10
		0.00116	-1.37593e-10	-2.81739e-10		0.00116	-2.49602e-12	-7.20103e-10	-1.11697e-10
		0.00118	-1.38217e-10	-2.80491e-10		0.00118	-2.49602e-12	-7.20103e-10	-1.11697e-10
		0.0012	-1.38217e-10	-2.78931e-10		0.0012	-2.80803e-12	-7.18231e-10	-1.12321e-10
		0.00122	-1.39465e-10	-2.78619e-10		0.00122	-2.80803e-12	-7.18231e-10	-1.13569e-10
		0.00124	-1.40089e-10	-2.75811e-10		0.00124	-3.74404e-12	-7.15735e-10	-1.14817e-10
		0.00126	-1.40713e-10	-2.75187e-10		0.00126	-3.74404e-12	-7.15735e-10	-1.14193e-10
		0.00128	-1.39465e-10	-2.74251e-10		0.00128	-4.05604e-12	-7.14487e-10	-1.14193e-10
		0.0013	-1.39777e-10	-2.74563e-10		0.0013	-3.74404e-12	-7.14487e-10	-1.15441e-10
		0.00132	-1.38529e-10	-2.74251e-10		0.00132	-4.68004e-12	-7.15735e-10	-1.16065e-10
		0.00134	-1.38217e-10	-2.73627e-10		0.00134	-4.99205e-12	-7.16359e-10	-1.14817e-10
		0.00136	-1.38841e-10	-2.73939e-10		0.00136	-4.05604e-12	-7.18855e-10	-1.16689e-10
		0.00138	-1.39465e-10	-2.73003e-10		0.00138	-3.43203e-12	-7.23223e-10	-1.16689e-10
		0.0014	-1.41025e-10	-2.72691e-10		0.0014	-4.05604e-12	-7.24471e-10	-1.17313e-10
		0.00142	-1.41649e-10	-2.72379e-10		0.00142	-3.74404e-12	-7.25095e-10	-1.15441e-10
		0.00144	-1.41961e-10	-2.72379e-10		0.00144	-4.36804e-12	-7.26343e-10	-1.16689e-10
		0.00146	-1.40401e-10	-2.72067e-10		0.00146	-5.30405e-12	-7.25095e-10	-1.14817e-10
		0.00148	-1.38841e-10	-2.72067e-10		0.00148	-7.17607e-12	-7.20103e-10	-1.14193e-10
		0.0015	-1.36657e-10	-2.73315e-10		0.0015	-6.86406e-12	-7.17607e-10	-1.14193e-10
		0.00152	-1.36657e-10	-2.73003e-10		0.00152	-7.48807e-12	-7.15111e-10	-1.11073e-10
		0.00154	-1.35721e-10	-2.72379e-10		0.00154	-7.17607e-12	-7.14487e-10	-1.08577e-10
		0.00156	-1.36657e-10	-2.72379e-10		0.00156	-5.92806e-12	-7.14487e-10	-1.10449e-10
		0.00158	-1.37281e-10	-2.70507e-10		0.00158	-4.68004e-12	-7.14487e-10	-1.09201e-10
		0.0016	-1.37281e-10	-2.70507e-10		0.0016	-1.87202e-12	-7.15111e-10	-1.09201e-10
		0.00162	-1.34785e-10	-2.70507e-10		0.00162	-1.56001e-12	-7.15735e-10	-1.08577e-10
		0.00164	-1.32913e-10	-2.70507e-10		0.00164	1.24801e-12	-7.16359e-10	-1.09201e-10
		0.00166	-1.32913e-10	-2.70819e-10		0.00166	1.87202e-12	-7.16983e-10	-1.09825e-10
		0.00168	-1.34161e-10	-2.71443e-10		0.00168	2.49602e-12	-7.16983e-10	-1.12321e-10
		0.0017	-1.36033e-10	-2.72379e-10		0.0017	1.24801e-12	-7.18855e-10	-1.12945e-10
		0.00172	-1.38529e-10	-2.74251e-10		0.00172	-6.24006e-13	-7.18231e-10	-1.14193e-10
		0.00174	-1.39777e-10	-2.75187e-10		0.00174	-2.49602e-12	-7.19479e-10	-1.13569e-10
		0.00176	-1.41961e-10	-2.77059e-10		0.00176	-3.43203e-12	-7.19479e-10	-1.14193e-10
		0.00178	-1.41961e-10	-2.78931e-10		0.00178	-4.36804e-12	-7.20727e-10	-1.14193e-10
		0.0018	-1.41961e-10	-2.80179e-10		0.0018	-4.68004e-12	-7.21351e-10	-1.16065e-10
		0.00182	-1.41649e-10	-2.81115e-10		0.00182	-4.68004e-12	-7.20727e-10	-1.14817e-10
		0.00184	-1.39465e-10	-2.81739e-10		0.00184	-4.99205e-12	-7.20727e-10	-1.16689e-10
		0.00186	-1.37905e-10	-2.79867e-10		0.00186	-4.99205e-12	-7.20727e-10	-1.14817e-10
		0.00188	-1.35409e-10	-2.78619e-10		0.00188	-4.05604e-12	-7.21351e-10	-1.15441e-10
		0.0019	-1.33849e-10	-2.77683e-10		0.0019	-4.68004e-12	-7.22599e-10	-1.14193e-10
		0.00192	-1.33537e-10	-2.76123e-10		0.00192	-3.43203e-12	-7.24471e-10	-1.14193e-10
		0.00194	-1.32601e-10	-2.75499e-10		0.00194	-4.05604e-12	-7.23223e-10	-1.12945e-10
		0.00196	-1.32289e-10	-2.76435e-10		0.00196	-4.68004e-12	-7.23847e-10	-1.10449e-10
		0.00198	-1.30729e-10	-2.75499e-10		0.00198	-5.30405e-12	-7.23223e-10	-1.09825e-10
		0.002	-1.29481e-10	-2.74563e-10		0.002	-5.61605e-12	-7.20727e-10	-1.11697e-10
		0.00202	-1.28857e-10	-2.73939e-10		0.00202	-6.24006e-12	-7.20727e-10	-1.11697e-10
		0.00204	-1.27609e-10	-2.72691e-10		0.00204	-7.48807e-12	-7.20727e-10	-1.10449e-10
		0.00206	-1.28545e-10	-2.72379e-10		0.00206	-6.86406e-12	-7.20103e-10	-1.11073e-10
		0.00208	-1.29481e-10	-2.73003e-10		0.00208	-5.92806e-12	-7.21351e-10	-1.12321e-10
		0.0021	-1.30417e-10	-2.74251e-10		0.0021	-5.61605e-12	-7.19479e-10	-1.10449e-10
		0.00212	-1.31977e-10	-2.75811e-10		0.00212	-4.36804e-12	-7.18231e-10	-1.09825e-10
		0.00214	-1.31977e-10	-2.78619e-10		0.00214	-4.36804e-12	-7.17607e-10	-1.09825e-10
		0.00216	-1.32913e-10	-2.78307e-10		0.00216	-5.30405e-12	-7.16983e-10	-1.08577e-10
		0.00218	-1.33849e-10	-2.77683e-10		0.00218	-5.30405e-12	-7.15735e-10	-1.07953e-10
		0.0022	-1.33537e-10	-2.74875e-10		0.0022	-4.36804e-12	-7.16359e-10	-1.07953e-10
		0.00222	-1.35097e-10	-2.73003e-10		0.00222	-4.05604e-12	-7.16983e-10	-1.09201e-10
		0.00224	-1.35409e-10	-2.71131e-10		0.00224	-4.05604e-12	-7.15111e-10	-1.10449e-10
		0.00226	-1.35721e-10	-2.70819e-10		0.00226	-2.80803e-12	-7.18231e-10	-1.10449e-10
		0.00228	-1.35097e-10	-2.70819e-10		0.00228	-9.36009e-13	-7.19479e-10	-1.11697e-10
		0.0023	-1.33849e-10	-2.71755e-10		0.0023	-6.24006e-13	-7.20103e-10	-1.09825e-10
		0.00232	-1.32289e-10	-2.73315e-10		0.00232	-3.12003e-13	-7.18855e-10	-1.08577e-10
		0.00234	-1.31041e-10	-2.75811e-10		0.00234	-1.56001e-12	-7.18855e-10	-1.09201e-10
		0.00236	-1.31041e-10	-2.76123e-10		0.00236	-1.87202e-12	-7.17607e-10	-1.08577e-10
		0.00238	-1.31041e-10	-2.76123e-10		0.00238	-3.12003e-12	-7.20727e-10	-1.10449e-10
		0.0024	-1.31353e-10	-2.76435e-10		0.0024	-4.99205e-12	-7.20103e-10	-1.10449e-10
		0.00242	-1.32289e-10	-2.75187e-10		0.00242	-4.99205e-12	-7.20103e-10	-1.11073e-10
		0.00244	-1.32913e-10	-2.74875e-10		0.00244	-4.99205e-12	-7.18231e-10	-1.11697e-10
		0.00246	-1.32913e-10	-2.75811e-10		0.00246	-5.30405e-12	-7.18231e-10	-1.12321e-10
		0.00248	-1.34473e-10	-2.75811e-10		0.00248	-4.99205e-12	-7.18855e-10	-1.13569e-10
		0.0025	-1.34161e-10	-2.76435e-10		0.0025	-5.61605e-12	-7.18231e-10	-1.14193e-10
		0.00252	-1.35409e-10	-2.76435e-10		0.00252	-6.55206e-12	-7.19479e-10	-1.16065e-10
		0.00254	-1.36969e-10	-2.76435e-10		0.00254	-6.55206e-12	-7.20103e-10	-1.16689e-10
		0.00256	-1.36969e-10	-2.77059e-10		0.00256	-7.48807e-12	-7.22599e-10	-1.19185e-10
		0.00258	-1.36969e-10	-2.77371e-10		0.00258	-6.86406e-12	-7.21975e-10	-1.18561e-10
		0.0026	-1.35097e-10	-2.77995e-10		0.0026	-7.17607e-12	-7.22599e-10	-1.18561e-10
		0.00262	-1.34473e-10	-2.77683e-10		0.00262	-6.24006e-12	-7.19479e-10	-1.16065e-10
		0.00264	-1.33849e-10	-2.78931e-10		0.00264	-5.61605e-12	-7.19479e-10	-1.14817e-10
		0.00266	-1.32913e-10	-2.77371e-10		0.00266	-4.68004e-12	-7.17607e-10	-1.13569e-10
		0.00268	-1.32913e-10	-2.76747e-10		0.00268	-3.43203e-12	-7.17607e-10	-1.12321e-10
		0.0027	-1.32289e-10	-2.73939e-10		0.0027	-3.43203e-12	-7.16983e-10	-1.13569e-10
		0.00272	-1.34161e-10	-2.73315e-10		0.00272	-3.43203e-12	-7.18231e-10	-1.15441e-10
		0.00274	-1.34161e-10	-2.72067e-10		0.00274	-2.80803e-12	-7.18231e-10	-1.12945e-10
		0.00276	-1.34785e-10	-2.70819e-10		0.00276	-3.43203e-12	-7.18855e-10	-1.12945e-10
		0.00278	-1.35409e-10	-2.69883e-10		0.00278	-4.68004e-12	-7.20103e-10	-1.11073e-10
		0.0028	-1.35409e-10	-2.71131e-10		0.0028	-4.99205e-12	-7.19479e-10	-1.09825e-10
		0.00282	-1.36033e-10	-2.70819e-10		0.00282	-5.30405e-12	-7.19479e-10	-1.07953e-10
		0.00284	-1.35409e-10	-2.72691e-10		0.00284	-4.99205e-12	-7.18231e-10	-1.07953e-10
		0.00286	-1.36345e-10	-2.73003e-10		0.00286	-4.36804e-12	-7.20103e-10	-1.10449e-10
		0.00288	-1.37593e-10	-2.73939e-10		0.00288	-4.68004e-12	-7.22599e-10	-1.12945e-10
		0.0029	-1.37905e-10	-2.74875e-10		0.0029	-3.43203e-12	-7.22599e-10	-1.12945e-10
		0.00292	-1.38217e-10	-2.75187e-10		0.00292	-3.43203e-12	-7.25719e-10	-1.14817e-10
		0.00294	-1.37905e-10	-2.75811e-10		0.00294	-4.05604e-12	-7.26967e-10	-1.14817e-10
		0.00296	-1.36345e-10	-2.77683e-10		0.00296	-4.05604e-12	-7.26967e-10	-1.14817e-10
		0.00298	-1.35409e-10	-2.78307e-10		0.00298	-4.36804e-12	-7.24471e-10	-1.14817e-10
		0.003	-1.32913e-10	-2.79243e-10		0.003	-5.61605e-12	-7.22599e-10	-1.13569e-10
		0.00302	-1.31353e-10	-2.79243e-10		0.00302	-5.92806e-12	-7.19479e-10	-1.12321e-10
		0.00304	-1.29793e-10	-2.78307e-10		0.00304	-5.30405e-12	-7.19479e-10	-1.12321e-10
		0.00306	-1.28545e-10	-2.76747e-10		0.00306	-4.99205e-12	-7.20103e-10	-1.14193e-10
		0.00308	-1.30105e-10	-2.77059e-10		0.00308	-4.36804e-12	-7.21351e-10	-1.18561e-10
		0.0031	-1.31353e-10	-2.75499e-10		0.0031	-4.05604e-12	-7.23223e-10	-1.23553e-10
		0.00312	-1.33537e-10	-2.73003e-10		0.00312	-3.12003e-12	-7.25095e-10	-1.29169e-10
		0.00314	-1.35409e-10	-2.70195e-10		0.00314	-1.87202e-12	-7.24471e-10	-1.34161e-10
		0.00316	-1.37905e-10	-2.68011e-10		0.00316	-3.12003e-13	-7.24471e-10	-1.35409e-10
		0.00318	-1.41649e-10	-2.6645e-10		0.00318	-9.36009e-13	-7.23847e-10	-1.33537e-10
		0.0032	-1.44145e-10	-2.67387e-10		0.0032	-1.24801e-12	-7.24471e-10	-1.29793e-10
		0.00322	-1.46329e-10	-2.69259e-10		0.00322	-2.80803e-12	-7.26343e-10	-1.24801e-10
		0.00324	-1.47577e-10	-2.72379e-10		0.00324	-4.36804e-12	-7.29463e-10	-1.18561e-10
		0.00326	-1.48513e-10	-2.77995e-10		0.00326	-4.99205e-12	-7.34455e-10	-1.14193e-10
		0.00328	-1.48825e-10	-2.82363e-10		0.00328	-7.48807e-12	-7.40695e-10	-1.07953e-10
		0.0033	-1.47889e-10	-2.88603e-10		0.0033	-9.36009e-12	-7.47559e-10	-1.04209e-10
		0.00332	-1.47265e-10	-2.94219e-10		0.00332	-1.15441e-11	-7.56919e-10	-1.02961e-10
		0.00334	-1.48201e-10	-3.00147e-10		0.00334	-1.49761e-11	-7.63783e-10	-1.04209e-10
		0.00336	-1.49449e-10	-3.05451e-10		0.00336	-1.84082e-11	-7.70647e-10	-1.05457e-10
		0.00338	-1.52257e-10	-3.10131e-10		0.00338	-2.15282e-11	-7.79383e-10	-1.08577e-10
		0.0034	-1.55377e-10	-3.13875e-10		0.0034	-2.55842e-11	-7.86247e-10	-1.14817e-10
		0.00342	-1.56937e-10	-3.16371e-10		0.00342	-2.87043e-11	-7.91239e-10	-1.19809e-10
		0.00344	-1.58809e-10	-3.17619e-10		0.00344	-3.08883e-11	-7.96855e-10	-1.24177e-10
		0.00346	-1.60057e-10	-3.19179e-10		0.00346	-3.30723e-11	-7.99351e-10	-1.26049e-10
		0.00348	-1.60369e-10	-3.20739e-10		0.00348	-3.49443e-11	-8.01223e-10	-1.27297e-10
		0.0035	-1.60369e-10	-3.21363e-10		0.0035	-3.61923e-11	-8.01223e-10	-1.31665e-10
		0.00352	-1.60993e-10	-3.23235e-10		0.00352	-3.65043e-11	-8.01223e-10	-1.34161e-10
		0.00354	-1.62242e-10	-3.23859e-10		0.00354	-3.61923e-11	-8.02471e-10	-1.37905e-10
		0.00356	-1.64114e-10	-3.25107e-10		0.00356	-3.58803e-11	-8.01223e-10	-1.38529e-10
		0.00358	-1.65986e-10	-3.24483e-10		0.00358	-3.55683e-11	-8.01223e-10	-1.41025e-10
		0.0036	-1.67234e-10	-3.23859e-10		0.0036	-3.40083e-11	-8.01223e-10	-1.43521e-10
		0.00362	-1.6817e-10	-3.22923e-10		0.00362	-3.30723e-11	-8.01223e-10	-1.44145e-10
		0.00364	-1.68482e-10	-3.21987e-10		0.00364	-3.21363e-11	-8.02471e-10	-1.47265e-10
		0.00366	-1.68482e-10	-3.21987e-10		0.00366	-3.12003e-11	-8.02471e-10	-1.47889e-10
		0.00368	-1.67858e-10	-3.21051e-10		0.00368	-3.05763e-11	-8.05592e-10	-1.52257e-10
		0.0037	-1.66922e-10	-3.20427e-10		0.0037	-2.96403e-11	-8.08088e-10	-1.54753e-10
		0.00372	-1.65986e-10	-3.19803e-10		0.00372	-2.96403e-11	-8.08088e-10	-1.56625e-10
		0.00374	-1.66298e-10	-3.20115e-10		0.00374	-2.99523e-11	-8.08712e-10	-1.59121e-10
		0.00376	-1.65674e-10	-3.21051e-10		0.00376	-2.99523e-11	-8.08712e-10	-1.59121e-10
		0.00378	-1.6505e-10	-3.21987e-10		0.00378	-2.96403e-11	-8.06216e-10	-1.59121e-10
		0.0038	-1.65674e-10	-3.22923e-10		0.0038	-3.02643e-11	-8.04967e-10	-1.59121e-10
		0.00382	-1.6505e-10	-3.24483e-10		0.00382	-3.08883e-11	-8.02471e-10	-1.57873e-10
		0.00384	-1.6349e-10	-3.25107e-10		0.00384	-3.12003e-11	-8.00599e-10	-1.58497e-10
		0.00386	-1.62866e-10	-3.25731e-10		0.00386	-3.05763e-11	-7.99351e-10	-1.59745e-10
		0.00388	-1.63178e-10	-3.25107e-10		0.00388	-3.02643e-11	-7.97479e-10	-1.61618e-10
		0.0039	-1.6349e-10	-3.24483e-10		0.0039	-2.99523e-11	-7.98103e-10	-1.61618e-10
		0.00392	-1.64114e-10	-3.24171e-10		0.00392	-2.90163e-11	-7.98727e-10	-1.62242e-10
		0.00394	-1.64426e-10	-3.24795e-10		0.00394	-2.74563e-11	-7.98103e-10	-1.6349e-10
		0.00396	-1.64426e-10	-3.25107e-10		0.00396	-2.71443e-11	-7.96231e-10	-1.62866e-10
		0.00398	-1.64426e-10	-3.25731e-10		0.00398	-2.68322e-11	-7.95607e-10	-1.62242e-10
		0.004	-1.6505e-10	-3.25107e-10		0.004	-2.62082e-11	-7.95607e-10	-1.62242e-10
		0.00402	-1.6505e-10	-3.24483e-10		0.00402	-2.74563e-11	-7.95607e-10	-1.62866e-10
		0.00404	-1.65674e-10	-3.22923e-10		0.00404	-2.83923e-11	-7.94983e-10	-1.64114e-10
		0.00406	-1.6505e-10	-3.20427e-10		0.00406	-2.87043e-11	-7.96855e-10	-1.6349e-10
		0.00408	-1.6505e-10	-3.17931e-10		0.00408	-2.83923e-11	-7.95607e-10	-1.64114e-10
		0.0041	-1.64426e-10	-3.15747e-10		0.0041	-2.77683e-11	-7.96231e-10	-1.62242e-10
		0.00412	-1.62554e-10	-3.15747e-10		0.00412	-2.65202e-11	-7.94359e-10	-1.6349e-10
		0.00414	-1.60993e-10	-3.15123e-10		0.00414	-2.58962e-11	-7.94983e-10	-1.60993e-10
		0.00416	-1.60057e-10	-3.14811e-10		0.00416	-2.55842e-11	-7.93111e-10	-1.62242e-10
		0.00418	-1.60057e-10	-3.13875e-10		0.00418	-2.58962e-11	-7.91239e-10	-1.62242e-10
		0.0042	-1.60369e-10	-3.14811e-10		0.0042	-2.58962e-11	-7.91239e-10	-1.65362e-10
		0.00422	-1.60681e-10	-3.14499e-10		0.00422	-2.65202e-11	-7.91863e-10	-1.6661e-10
		0.00424	-1.60681e-10	-3.14187e-10		0.00424	-2.55842e-11	-7.93111e-10	-1.65986e-10
		0.00426	-1.60993e-10	-3.13875e-10		0.00426	-2.43362e-11	-7.94983e-10	-1.67858e-10
		0.00428	-1.60993e-10	-3.14499e-10		0.00428	-2.37122e-11	-7.94983e-10	-1.67234e-10
		0.0043	-1.60993e-10	-3.15123e-10		0.0043	-2.24642e-11	-7.94359e-10	-1.6661e-10
		0.00432	-1.60369e-10	-3.16683e-10		0.00432	-2.24642e-11	-7.92487e-10	-1.64738e-10
		0.00434	-1.59745e-10	-3.16995e-10		0.00434	-2.15282e-11	-7.91863e-10	-1.64114e-10
		0.00436	-1.60681e-10	-3.17619e-10		0.00436	-2.09042e-11	-7.93111e-10	-1.60369e-10
		0.00438	-1.60369e-10	-3.17931e-10		0.00438	-2.05922e-11	-7.93735e-10	-1.59745e-10
		0.0044	-1.60369e-10	-3.18243e-10		0.0044	-2.05922e-11	-7.93111e-10	-1.59745e-10
		0.00442	-1.60057e-10	-3.17931e-10		0.00442	-2.02802e-11	-7.90615e-10	-1.60993e-10
		0.00444	-1.60369e-10	-3.18243e-10		0.00444	-2.09042e-11	-7.90615e-10	-1.59745e-10
		0.00446	-1.59745e-10	-3.18243e-10		0.00446	-2.18402e-11	-7.89991e-10	-1.59745e-10
		0.00448	-1.60057e-10	-3.17931e-10		0.00448	-2.24642e-11	-7.88119e-10	-1.58497e-10
		0.0045	-1.60369e-10	-3.17307e-10		0.0045	-2.27762e-11	-7.86871e-10	-1.56625e-10
		0.00452	-1.60369e-10	-3.17307e-10		0.00452	-2.30882e-11	-7.85623e-10	-1.55377e-10
		0.00454	-1.6193e-10	-3.17619e-10		0.00454	-2.34002e-11	-7.85623e-10	-1.54753e-10
		0.00456	-1.6349e-10	-3.16371e-10		0.00456	-2.27762e-11	-7.84999e-10	-1.56001e-10
		0.00458	-1.64738e-10	-3.16683e-10		0.00458	-2.24642e-11	-7.84999e-10	-1.54129e-10
		0.0046	-1.64114e-10	-3.17619e-10		0.0046	-2.05922e-11	-7.86247e-10	-1.54129e-10
		0.00462	-1.62866e-10	-3.18867e-10		0.00462	-1.93442e-11	-7.85623e-10	-1.52881e-10
		0.00464	-1.60993e-10	-3.19491e-10		0.00464	-1.68482e-11	-7.85623e-10	-1.52257e-10
		0.00466	-1.58185e-10	-3.20427e-10		0.00466	-1.62242e-11	-7.84999e-10	-1.51009e-10
		0.00468	-1.55689e-10	-3.19491e-10		0.00468	-1.56001e-11	-7.84999e-10	-1.51633e-10
		0.0047	-1.54129e-10	-3.18555e-10		0.0047	-1.62242e-11	-7.85623e-10	-1.51009e-10
		0.00472	-1.53193e-10	-3.15747e-10		0.00472	-1.80962e-11	-7.86871e-10	-1.51633e-10
		0.00474	-1.53817e-10	-3.13563e-10		0.00474	-1.96562e-11	-7.88743e-10	-1.51009e-10
		0.00476	-1.55065e-10	-3.11379e-10		0.00476	-1.99682e-11	-7.89367e-10	-1.53505e-10
		0.00478	-1.55377e-10	-3.11067e-10		0.00478	-2.09042e-11	-7.90615e-10	-1.52257e-10
		0.0048	-1.56313e-10	-3.11379e-10		0.0048	-2.15282e-11	-7.89991e-10	-1.52257e-10
		0.00482	-1.56937e-10	-3.12315e-10		0.00482	-2.09042e-11	-7.89991e-10	-1.51633e-10
		0.00484	-1.57561e-10	-3.13563e-10		0.00484	-2.05922e-11	-7.88119e-10	-1.52257e-10
		0.00486	-1.58809e-10	-3.14499e-10		0.00486	-2.05922e-11	-7.88119e-10	-1.52257e-10
		0.00488	-1.60057e-10	-3.15747e-10		0.00488	-1.93442e-11	-7.88119e-10	-1.52881e-10
		0.0049	-1.61306e-10	-3.15435e-10		0.0049	-1.90322e-11	-7.89367e-10	-1.54129e-10
		0.00492	-1.62554e-10	-3.15123e-10		0.00492	-1.87202e-11	-7.89367e-10	-1.53505e-10
		0.00494	-1.62866e-10	-3.14187e-10		0.00494	-1.80962e-11	-7.89367e-10	-1.52257e-10
		0.00496	-1.62554e-10	-3.14187e-10		0.00496	-1.68482e-11	-7.88119e-10	-1.52257e-10
		0.00498	-1.60681e-10	-3.13875e-10		0.00498	-1.59121e-11	-7.87495e-10	-1.51633e-10
		0.005	-1.58185e-10	-3.13563e-10		0.005	-1.52881e-11	-7.86871e-10	-1.51633e-10
		0.00502	-1.57249e-10	-3.14499e-10		0.00502	-1.46641e-11	-7.88743e-10	-1.51633e-10
		0.00504	-1.55377e-10	-3.15747e-10		0.00504	-1.46641e-11	-7.88743e-10	-1.51633e-10
		0.00506	-1.54753e-10	-3.16059e-10		0.00506	-1.40401e-11	-7.89991e-10	-1.51633e-10
		0.00508	-1.53193e-10	-3.16683e-10		0.00508	-1.52881e-11	-7.90615e-10	-1.49761e-10
		0.0051	-1.52257e-10	-3.15747e-10		0.0051	-1.74722e-11	-7.89367e-10	-1.51009e-10
		0.00512	-1.50697e-10	-3.16371e-10		0.00512	-1.96562e-11	-7.89991e-10	-1.49761e-10
		0.00514	-1.49449e-10	-3.15123e-10		0.00514	-2.02802e-11	-7.87495e-10	-1.48513e-10
		0.00516	-1.48201e-10	-3.14187e-10		0.00516	-2.09042e-11	-7.85623e-10	-1.47265e-10
		0.00518	-1.49137e-10	-3.11691e-10		0.00518	-2.05922e-11	-7.85623e-10	-1.49137e-10
		0.0052	-1.50697e-10	-3.10443e-10		0.0052	-2.02802e-11	-7.83751e-10	-1.47889e-10
		0.00522	-1.53817e-10	-3.09507e-10		0.00522	-1.96562e-11	-7.84375e-10	-1.47265e-10
		0.00524	-1.56001e-10	-3.08259e-10		0.00524	-1.93442e-11	-7.83127e-10	-1.47265e-10
		0.00526	-1.57873e-10	-3.07635e-10		0.00526	-1.84082e-11	-7.83751e-10	-1.47889e-10
		0.00528	-1.59433e-10	-3.08259e-10		0.00528	-1.96562e-11	-7.82503e-10	-1.47265e-10
		0.0053	-1.60369e-10	-3.08883e-10		0.0053	-1.99682e-11	-7.83127e-10	-1.46641e-10
		0.00532	-1.61306e-10	-3.09507e-10		0.00532	-1.96562e-11	-7.83127e-10	-1.44769e-10
		0.00534	-1.61618e-10	-3.09507e-10		0.00534	-2.12162e-11	-7.83127e-10	-1.44145e-10
		0.00536	-1.62242e-10	-3.09507e-10		0.00536	-2.02802e-11	-7.83751e-10	-1.42273e-10
		0.00538	-1.63178e-10	-3.09819e-10		0.00538	-2.09042e-11	-7.83751e-10	-1.44769e-10
		0.0054	-1.6349e-10	-3.08883e-10		0.0054	-2.05922e-11	-7.85623e-10	-1.44145e-10
		0.00542	-1.62866e-10	-3.09507e-10		0.00542	-2.02802e-11	-7.84999e-10	-1.46641e-10
		0.00544	-1.62242e-10	-3.10131e-10		0.00544	-1.80962e-11	-7.83751e-10	-1.44769e-10
		0.00546	-1.61618e-10	-3.10443e-10		0.00546	-1.59121e-11	-7.83127e-10	-1.45393e-10
		0.00548	-1.62242e-10	-3.10443e-10		0.00548	-1.46641e-11	-7.81255e-10	-1.44145e-10
		0.0055	-1.60057e-10	-3.10443e-10		0.0055	-1.52881e-11	-7.82503e-10	-1.44145e-10
		0.00552	-1.59745e-10	-3.10755e-10		0.00552	-1.56001e-11	-7.81255e-10	-1.42897e-10
		0.00554	-1.59745e-10	-3.11067e-10		0.00554	-1.74722e-11	-7.81255e-10	-1.42273e-10
		0.00556	-1.59433e-10	-3.10131e-10		0.00556	-1.90322e-11	-7.81255e-10	-1.42273e-10
		0.00558	-1.58809e-10	-3.09819e-10		0.00558	-1.96562e-11	-7.81879e-10	-1.41649e-10
		0.0056	-1.58185e-10	-3.09507e-10		0.0056	-1.96562e-11	-7.81255e-10	-1.43521e-10
		0.00562	-1.57561e-10	-3.09819e-10		0.00562	-1.96562e-11	-7.80631e-10	-1.42897e-10
		0.00564	-1.57873e-10	-3.10755e-10		0.00564	-2.02802e-11	-7.80631e-10	-1.41649e-10
		0.00566	-1.57873e-10	-3.12003e-10		0.00566	-2.02802e-11	-7.80631e-10	-1.42273e-10
		0.00568	-1.58809e-10	-3.12627e-10		0.00568	-2.02802e-11	-7.82503e-10	-1.43521e-10
		0.0057	-1.58809e-10	-3.12939e-10		0.0057	-1.93442e-11	-7.83127e-10	-1.42897e-10
		0.00572	-1.58497e-10	-3.12003e-10		0.00572	-1.93442e-11	-7.84375e-10	-1.41649e-10
		0.00574	-1.58497e-10	-3.12003e-10		0.00574	-1.93442e-11	-7.84999e-10	-1.43521e-10
		0.00576	-1.58497e-10	-3.12003e-10		0.00576	-1.77842e-11	-7.85623e-10	-1.44145e-10
		0.00578	-1.58809e-10	-3.13563e-10		0.00578	-1.77842e-11	-7.84999e-10	-1.42273e-10
		0.0058	-1.58497e-10	-3.13563e-10		0.0058	-1.68482e-11	-7.82503e-10	-1.41025e-10
		0.00582	-1.59433e-10	-3.14187e-10		0.00582	-1.52881e-11	-7.82503e-10	-1.39153e-10
		0.00584	-1.59121e-10	-3.14499e-10		0.00584	-1.56001e-11	-7.81255e-10	-1.39777e-10
		0.00586	-1.57561e-10	-3.14499e-10		0.00586	-1.52881e-11	-7.80631e-10	-1.40401e-10
		0.00588	-1.55689e-10	-3.13251e-10		0.00588	-1.65362e-11	-7.81879e-10	-1.40401e-10
		0.0059	-1.53193e-10	-3.12315e-10		0.0059	-1.62242e-11	-7.81879e-10	-1.41025e-10
		0.00592	-1.53817e-10	-3.11691e-10		0.00592	-1.56001e-11	-7.81255e-10	-1.43521e-10
		0.00594	-1.53193e-10	-3.11379e-10		0.00594	-1.49761e-11	-7.81879e-10	-1.42897e-10
		0.00596	-1.52257e-10	-3.11067e-10		0.00596	-1.37281e-11	-7.80007e-10	-1.41649e-10
		0.00598	-1.51321e-10	-3.11379e-10		0.00598	-1.37281e-11	-7.78759e-10	-1.40401e-10
		0.006	-1.49137e-10	-3.11067e-10		0.006	-1.34161e-11	-7.79383e-10	-1.42897e-10
		0.00602	-1.48513e-10	-3.11067e-10		0.00602	-1.43521e-11	-7.78135e-10	-1.40401e-10
		0.00604	-1.48201e-10	-3.10131e-10		0.00604	-1.56001e-11	-7.78759e-10	-1.39777e-10
		0.00606	-1.46953e-10	-3.08883e-10		0.00606	-1.59121e-11	-7.79383e-10	-1.39777e-10
		0.00608	-1.46953e-10	-3.07947e-10		0.00608	-1.68482e-11	-7.77511e-10	-1.37281e-10
		0.0061	-1.47265e-10	-3.09507e-10		0.0061	-1.62242e-11	-7.77511e-10	-1.31041e-10
		0.00612	-1.46953e-10	-3.10443e-10		0.00612	-1.68482e-11	-7.77511e-10	-1.23553e-10
		0.00614	-1.45705e-10	-3.13563e-10		0.00614	-1.80962e-11	-7.77511e-10	-1.16689e-10
		0.00616	-1.45705e-10	-3.16995e-10		0.00616	-1.87202e-11	-7.80631e-10	-1.14193e-10
		0.00618	-1.45393e-10	-3.20739e-10		0.00618	-2.02802e-11	-7.84375e-10	-1.16065e-10
		0.0062	-1.46329e-10	-3.22299e-10		0.0062	-2.05922e-11	-7.86871e-10	-1.21681e-10
		0.00622	-1.47577e-10	-3.20427e-10		0.00622	-1.93442e-11	-7.86871e-10	-1.26673e-10
		0.00624	-1.48201e-10	-3.16371e-10		0.00624	-1.74722e-11	-7.83127e-10	-1.34785e-10
		0.00626	-1.46953e-10	-3.12315e-10		0.00626	-1.37281e-11	-7.77511e-10	-1.41649e-10
		0.00628	-1.45393e-10	-3.06075e-10		0.00628	-8.42408e-12	-7.69399e-10	-1.44769e-10
		0.0063	-1.42273e-10	-3.00459e-10		0.0063	-3.43203e-12	-7.58167e-10	-1.47265e-10
		0.00632	-1.40089e-10	-2.94219e-10		0.00632	6.24006e-13	-7.51303e-10	-1.47265e-10
		0.00634	-1.36033e-10	-2.88291e-10		0.00634	2.80803e-12	-7.41319e-10	-1.47265e-10
		0.00636	-1.33537e-10	-2.82987e-10		0.00636	4.99205e-12	-7.35079e-10	-1.45393e-10
		0.00638	-1.30417e-10	-2.77371e-10		0.00638	6.86406e-12	-7.31959e-10	-1.44145e-10
		0.0064	-1.27921e-10	-2.73627e-10		0.0064	8.11208e-12	-7.25719e-10	-1.41649e-10
		0.00642	-1.25425e-10	-2.70195e-10		0.00642	9.67209e-12	-7.21351e-10	-1.37905e-10
		0.00644	-1.24801e-10	-2.68323e-10		0.00644	1.24801e-11	-7.16359e-10	-1.34161e-10
		0.00646	-1.24177e-10	-2.66763e-10		0.00646	1.40401e-11	-7.11991e-10	-1.27921e-10
		0.00648	-1.23865e-10	-2.65514e-10		0.00648	1.59121e-11	-7.08871e-10	-1.22305e-10
		0.0065	-1.24177e-10	-2.6489e-10		0.0065	1.71602e-11	-7.06999e-10	-1.18561e-10
		0.00652	-1.23553e-10	-2.64578e-10		0.00652	1.77842e-11	-7.03255e-10	-1.14817e-10
		0.00654	-1.23241e-10	-2.64266e-10		0.00654	1.74722e-11	-7.02007e-10	-1.09201e-10
		0.00656	-1.23241e-10	-2.6333e-10		0.00656	1.80962e-11	-7.00759e-10	-1.07953e-10
		0.00658	-1.22929e-10	-2.62082e-10		0.00658	1.77842e-11	-7.01383e-10	-1.04833e-10
		0.0066	-1.22929e-10	-2.62394e-10		0.0066	1.84082e-11	-7.00759e-10	-1.01713e-10
		0.00662	-1.22305e-10	-2.62082e-10		0.00662	1.87202e-11	-7.00135e-10	-9.85929e-11
		0.00664	-1.21057e-10	-2.62082e-10		0.00664	1.80962e-11	-6.99511e-10	-9.60969e-11
		0.00666	-1.20433e-10	-2.62082e-10		0.00666	1.74722e-11	-7.00135e-10	-9.36009e-11
		0.00668	-1.18249e-10	-2.63018e-10		0.00668	1.74722e-11	-7.00135e-10	-9.54729e-11
		0.0067	-1.18249e-10	-2.64266e-10		0.0067	1.52881e-11	-7.00135e-10	-9.48489e-11
		0.00672	-1.17625e-10	-2.65514e-10		0.00672	1.56001e-11	-6.99511e-10	-9.36009e-11
		0.00674	-1.19185e-10	-2.68323e-10		0.00674	1.43521e-11	-6.99511e-10	-9.29769e-11
		0.00676	-1.19809e-10	-2.68323e-10		0.00676	1.37281e-11	-6.98887e-10	-9.23529e-11
		0.00678	-1.21057e-10	-2.68947e-10		0.00678	1.40401e-11	-7.00135e-10	-9.36009e-11
		0.0068	-1.21057e-10	-2.67075e-10		0.0068	1.31041e-11	-7.00759e-10	-9.17289e-11
		0.00682	-1.21057e-10	-2.6645e-10		0.00682	1.21681e-11	-7.00759e-10	-9.11049e-11
		0.00684	-1.20433e-10	-2.65202e-10		0.00684	1.15441e-11	-7.02007e-10	-9.04808e-11
		0.00686	-1.20433e-10	-2.63954e-10		0.00686	1.12321e-11	-7.03255e-10	-8.98568e-11
		0.00688	-1.20433e-10	-2.64578e-10		0.00688	9.67209e-12	-7.04503e-10	-8.92328e-11
		0.0069	-1.21057e-10	-2.65514e-10		0.0069	9.04808e-12	-7.06375e-10	-9.04808e-11
		0.00692	-1.22617e-10	-2.67075e-10		0.00692	9.04808e-12	-7.08247e-10	-8.92328e-11
		0.00694	-1.22305e-10	-2.67699e-10		0.00694	8.11208e-12	-7.08871e-10	-8.61128e-11
		0.00696	-1.22929e-10	-2.69571e-10		0.00696	7.80007e-12	-7.08871e-10	-8.48648e-11
		0.00698	-1.22305e-10	-2.69883e-10		0.00698	8.73608e-12	-7.06999e-10	-8.42408e-11
		0.007	-1.21993e-10	-2.70195e-10		0.007	1.02961e-11	-7.06999e-10	-8.36168e-11
		0.00702	-1.21057e-10	-2.70819e-10		0.00702	1.12321e-11	-7.05751e-10	-8.36168e-11
		0.00704	-1.20745e-10	-2.71443e-10		0.00704	1.09201e-11	-7.05751e-10	-8.36168e-11
		0.00706	-1.20745e-10	-2.72067e-10		0.00706	1.02961e-11	-7.05751e-10	-8.54888e-11
		0.00708	-1.20121e-10	-2.72067e-10		0.00708	9.67209e-12	-7.06375e-10	-8.61128e-11
		0.0071	-1.20433e-10	-2.73315e-10		0.0071	9.04808e-12	-7.05127e-10	-8.79848e-11
		0.00712	-1.20433e-10	-2.73315e-10		0.00712	8.42408e-12	-7.04503e-10	-8.67368e-11
		0.00714	-1.21057e-10	-2.73315e-10		0.00714	7.17607e-12	-7.03255e-10	-8.54888e-11
		0.00716	-1.21057e-10	-2.74251e-10		0.00716	6.55206e-12	-7.03255e-10	-8.36168e-11
		0.00718	-1.22305e-10	-2.75499e-10		0.00718	5.92806e-12	-7.03255e-10	-8.36168e-11
		0.0072	-1.24489e-10	-2.74563e-10		0.0072	5.61605e-12	-7.05127e-10	-8.42408e-11
		0.00722	-1.25425e-10	-2.73939e-10		0.00722	5.30405e-12	-7.05127e-10	-8.48648e-11
		0.00724	-1.26673e-10	-2.73315e-10		0.00724	5.61605e-12	-7.06375e-10	-8.61128e-11
		0.00726	-1.26673e-10	-2.73627e-10		0.00726	5.92806e-12	-7.08247e-10	-8.67368e-11
		0.00728	-1.26985e-10	-2.72691e-10		0.00728	6.24006e-12	-7.10119e-10	-8.73608e-11
		0.0073	-1.27297e-10	-2.72067e-10		0.0073	5.30405e-12	-7.10119e-10	-8.73608e-11
		0.00732	-1.26673e-10	-2.71443e-10		0.00732	4.36804e-12	-7.09495e-10	-8.54888e-11
		0.00734	-1.26361e-10	-2.70819e-10		0.00734	3.74404e-12	-7.08871e-10	-8.54888e-11
		0.00736	-1.25113e-10	-2.70819e-10		0.00736	3.74404e-12	-7.08247e-10	-8.67368e-11
		0.00738	-1.25113e-10	-2.71443e-10		0.00738	3.43203e-12	-7.08247e-10	-8.67368e-11
		0.0074	-1.25737e-10	-2.71755e-10		0.0074	3.74404e-12	-7.08871e-10	-8.61128e-11
		0.00742	-1.26673e-10	-2.72067e-10		0.00742	3.74404e-12	-7.08871e-10	-8.73608e-11
		0.00744	-1.26985e-10	-2.73003e-10		0.00744	3.43203e-12	-7.12615e-10	-8.48648e-11
		0.00746	-1.27609e-10	-2.72691e-10		0.00746	1.56001e-12	-7.11367e-10	-8.48648e-11
		0.00748	-1.28233e-10	-2.73627e-10		0.00748	6.24006e-13	-7.08871e-10	-8.61128e-11
		0.0075	-1.29169e-10	-2.73939e-10		0.0075	-3.12003e-13	-7.09495e-10	-8.42408e-11
		0.00752	-1.28545e-10	-2.73627e-10		0.00752	-1.24801e-12	-7.08247e-10	-8.67368e-11
		0.00754	-1.27921e-10	-2.72067e-10		0.00754	-1.56001e-12	-7.09495e-10	-8.73608e-11
		0.00756	-1.27297e-10	-2.71131e-10		0.00756	-3.12003e-13	-7.09495e-10	-8.92328e-11
		0.00758	-1.25113e-10	-2.69571e-10		0.00758	6.24006e-13	-7.10119e-10	-9.04808e-11
		0.0076	-1.24177e-10	-2.68947e-10		0.0076	9.36009e-13	-7.12615e-10	-9.23529e-11
		0.00762	-1.23553e-10	-2.67699e-10		0.00762	1.87202e-12	-7.13239e-10	-9.17289e-11
		0.00764	-1.24177e-10	-2.68011e-10		0.00764	2.49602e-12	-7.12615e-10	-9.29769e-11
		0.00766	-1.24801e-10	-2.68947e-10		0.00766	3.12003e-12	-7.09495e-10	-9.23529e-11
		0.00768	-1.25113e-10	-2.68635e-10		0.00768	2.49602e-12	-7.08871e-10	-9.23529e-11
		0.0077	-1.26985e-10	-2.70195e-10		0.0077	2.18402e-12	-7.08871e-10	-9.36009e-11
		0.00772	-1.27921e-10	-2.70507e-10		0.00772	2.18402e-12	-7.08247e-10	-9.54729e-11
		0.00774	-1.28857e-10	-2.70507e-10		0.00774	1.87202e-12	-7.08871e-10	-9.73449e-11
		0.00776	-1.29481e-10	-2.71755e-10		0.00776	1.24801e-12	-7.12615e-10	-9.73449e-11
		0.00778	-1.28545e-10	-2.72067e-10		0.00778	1.56001e-12	-7.14487e-10	-9.60969e-11
		0.0078	-1.27609e-10	-2.73315e-10		0.0078	1.87202e-12	-7.16983e-10	-9.67209e-11
		0.00782	-1.26985e-10	-2.74251e-10		0.00782	2.49602e-12	-7.15735e-10	-9.48489e-11
		0.00784	-1.26985e-10	-2.75187e-10		0.00784	3.12003e-12	-7.15111e-10	-9.48489e-11
		0.00786	-1.25737e-10	-2.76435e-10		0.00786	3.12003e-12	-7.14487e-10	-9.36009e-11
		0.00788	-1.26673e-10	-2.77683e-10		0.00788	1.87202e-12	-7.13239e-10	-9.36009e-11
		0.0079	-1.27609e-10	-2.77371e-10		0.0079	9.36009e-13	-7.12615e-10	-9.36009e-11
		0.00792	-1.27921e-10	-2.77683e-10		0.00792	-3.12003e-13	-7.13863e-10	-9.23529e-11
		0.00794	-1.28545e-10	-2.76747e-10		0.00794	-1.56001e-12	-7.12615e-10	-9.42249e-11
		0.00796	-1.29169e-10	-2.74875e-10		0.00796	-2.80803e-12	-7.11991e-10	-9.42249e-11
		0.00798	-1.29793e-10	-2.74563e-10		0.00798	-3.43203e-12	-7.10119e-10	-9.48489e-11
		0.008	-1.30729e-10	-2.74251e-10		0.008	-3.74404e-12	-7.12615e-10	-9.60969e-11
		0.00802	-1.30417e-10	-2.74875e-10		0.00802	-3.43203e-12	-7.13863e-10	-9.60969e-11
		0.00804	-1.31353e-10	-2.74563e-10		0.00804	-2.49602e-12	-7.13863e-10	-9.73449e-11
		0.00806	-1.30729e-10	-2.73939e-10		0.00806	-1.87202e-12	-7.16359e-10	-9.67209e-11
		0.00808	-1.30105e-10	-2.73939e-10		0.00808	-3.12003e-13	-7.16983e-10	-9.73449e-11
		0.0081	-1.30105e-10	-2.73315e-10		0.0081	1.56001e-12	-7.17607e-10	-9.79689e-11
		0.00812	-1.30417e-10	-2.73627e-10		0.00812	3.12003e-12	-7.15111e-10	-9.85929e-11
		0.00814	-1.29481e-10	-2.73939e-10		0.00814	4.36804e-12	-7.14487e-10	-9.98409e-11
		0.00816	-1.29481e-10	-2.74251e-10		0.00816	4.99205e-12	-7.12615e-10	-9.98409e-11
		0.00818	-1.30105e-10	-2.74875e-10		0.00818	4.05604e-12	-7.11367e-10	-1.00465e-10
		0.0082	-1.31353e-10	-2.75187e-10		0.0082	3.12003e-12	-7.10119e-10	-1.00465e-10
		0.00822	-1.33849e-10	-2.75187e-10		0.00822	1.24801e-12	-7.09495e-10	-1.01089e-10
		0.00824	-1.35721e-10	-2.74875e-10		0.00824	1.24801e-12	-7.10743e-10	-1.01089e-10
		0.00826	-1.36657e-10	-2.75187e-10		0.00826	1.56001e-12	-7.09495e-10	-1.02337e-10
		0.00828	-1.36969e-10	-2.75811e-10		0.00828	1.87202e-12	-7.10119e-10	-1.02337e-10
		0.0083	-1.36033e-10	-2.76747e-10		0.0083	2.80803e-12	-7.09495e-10	-1.01089e-10
		0.00832	-1.36033e-10	-2.78619e-10		0.00832	3.12003e-12	-7.11367e-10	-1.00465e-10
		0.00834	-1.35721e-10	-2.79243e-10		0.00834	3.12003e-12	-7.11367e-10	-9.85929e-11
		0.00836	-1.35721e-10	-2.79243e-10		0.00836	3.12003e-12	-7.14487e-10	-9.85929e-11
		0.00838	-1.35409e-10	-2.79243e-10		0.00838	2.80803e-12	-7.15111e-10	-9.85929e-11
		0.0084	-1.33537e-10	-2.78619e-10		0.0084	2.18402e-12	-7.15735e-10	-9.98409e-11
		0.00842	-1.32601e-10	-2.77683e-10		0.00842	1.56001e-12	-7.15111e-10	-9.92169e-11
		0.00844	-1.31665e-10	-2.76747e-10		0.00844	2.18402e-12	-7.13239e-10	-9.98409e-11
		0.00846	-1.31977e-10	-2.76435e-10		0.00846	1.24801e-12	-7.12615e-10	-9.98409e-11
		0.00848	-1.32601e-10	-2.76747e-10		0.00848	1.56001e-12	-7.10743e-10	-9.98409e-11
		0.0085	-1.32913e-10	-2.75499e-10		0.0085	1.56001e-12	-7.10743e-10	-9.79689e-11
		0.00852	-1.34161e-10	-2.74251e-10		0.00852	2.18402e-12	-7.12615e-10	-9.79689e-11
		0.00854	-1.33849e-10	-2.73627e-10		0.00854	2.49602e-12	-7.12615e-10	-9.92169e-11
		0.00856	-1.35721e-10	-2.73003e-10		0.00856	1.56001e-12	-7.11991e-10	-9.98409e-11
		0.00858	-1.37281e-10	-2.73939e-10		0.00858	1.56001e-12	-7.13239e-10	-9.73449e-11
		0.0086	-1.37905e-10	-2.73939e-10		0.0086	0	-7.13863e-10	-9.79689e-11
		0.00862	-1.37905e-10	-2.73627e-10		0.00862	0	-7.13863e-10	-9.73449e-11
		0.00864	-1.37281e-10	-2.73627e-10		0.00864	-1.24801e-12	-7.13239e-10	-9.92169e-11
		0.00866	-1.38217e-10	-2.73939e-10		0.00866	-1.24801e-12	-7.11991e-10	-1.01089e-10
		0.00868	-1.37905e-10	-2.73315e-10		0.00868	-1.87202e-12	-7.13239e-10	-1.01713e-10
		0.0087	-1.37281e-10	-2.73315e-10		0.0087	-1.87202e-12	-7.13239e-10	-1.01713e-10
		0.00872	-1.37593e-10	-2.71443e-10		0.00872	-3.12003e-12	-7.15111e-10	-1.02961e-10
		0.00874	-1.36033e-10	-2.70819e-10		0.00874	-3.43203e-12	-7.15111e-10	-1.03585e-10
		0.00876	-1.34473e-10	-2.70819e-10		0.00876	-4.05604e-12	-7.14487e-10	-1.04833e-10
		0.00878	-1.31665e-10	-2.72379e-10		0.00878	-3.43203e-12	-7.15735e-10	-1.04833e-10
		0.0088	-1.31041e-10	-2.72379e-10		0.0088	-3.43203e-12	-7.15735e-10	-1.06705e-10
		0.00882	-1.30105e-10	-2.72691e-10		0.00882	-3.74404e-12	-7.14487e-10	-1.04833e-10
		0.00884	-1.30729e-10	-2.72691e-10		0.00884	-3.74404e-12	-7.15735e-10	-1.02961e-10
		0.00886	-1.30729e-10	-2.71755e-10		0.00886	-4.36804e-12	-7.15735e-10	-1.01713e-10
		0.00888	-1.31353e-10	-2.70195e-10		0.00888	-3.43203e-12	-7.16359e-10	-1.01089e-10
		0.0089	-1.31041e-10	-2.69883e-10		0.0089	-1.87202e-12	-7.16983e-10	-1.01713e-10
		0.00892	-1.31353e-10	-2.69259e-10		0.00892	-9.36009e-13	-7.16983e-10	-9.98409e-11
		0.00894	-1.30417e-10	-2.70195e-10		0.00894	6.24006e-13	-7.17607e-10	-1.01089e-10
		0.00896	-1.28857e-10	-2.71443e-10		0.00896	-3.12003e-13	-7.17607e-10	-1.00465e-10
		0.00898	-1.28233e-10	-2.73627e-10		0.00898	-6.24006e-13	-7.15111e-10	-1.01089e-10
		0.009	-1.27297e-10	-2.73627e-10		0.009	-3.12003e-12	-7.15735e-10	-1.01713e-10
		0.00902	-1.28233e-10	-2.73315e-10		0.00902	-2.80803e-12	-7.15735e-10	-1.04209e-10
		0.00904	-1.27609e-10	-2.73315e-10		0.00904	-3.74404e-12	-7.17607e-10	-1.04833e-10
		0.00906	-1.26673e-10	-2.72067e-10		0.00906	-3.74404e-12	-7.16359e-10	-1.06081e-10
		0.00908	-1.27297e-10	-2.72379e-10		0.00908	-2.18402e-12	-7.16983e-10	-1.07329e-10
		0.0091	-1.26985e-10	-2.71755e-10		0.0091	-9.36009e-13	-7.18231e-10	-1.06705e-10
		0.00912	-1.26985e-10	-2.71755e-10		0.00912	0	-7.15735e-10	-1.09201e-10
		0.00914	-1.27609e-10	-2.72379e-10		0.00914	3.12003e-13	-7.13863e-10	-1.07329e-10
		0.00916	-1.28233e-10	-2.73627e-10		0.00916	1.24801e-12	-7.11367e-10	-1.06705e-10
		0.00918	-1.29793e-10	-2.73315e-10		0.00918	6.24006e-13	-7.10119e-10	-1.06705e-10
		0.0092	-1.31353e-10	-2.73627e-10		0.0092	6.24006e-13	-7.11367e-10	-1.07329e-10
		0.00922	-1.30729e-10	-2.73627e-10		0.00922	9.36009e-13	-7.13239e-10	-1.09825e-10
		0.00924	-1.31353e-10	-2.73627e-10		0.00924	1.24801e-12	-7.15111e-10	-1.09201e-10
		0.00926	-1.31665e-10	-2.73939e-10		0.00926	1.24801e-12	-7.15735e-10	-1.09201e-10
		0.00928	-1.32289e-10	-2.73939e-10		0.00928	1.24801e-12	-7.16983e-10	-1.08577e-10
		0.0093	-1.32289e-10	-2.75187e-10		0.0093	1.56001e-12	-7.16359e-10	-1.06081e-10
		0.00932	-1.32913e-10	-2.76435e-10		0.00932	2.18402e-12	-7.16983e-10	-1.05457e-10
		0.00934	-1.33537e-10	-2.78619e-10		0.00934	2.49602e-12	-7.16983e-10	-1.03585e-10
		0.00936	-1.33537e-10	-2.78931e-10		0.00936	2.49602e-12	-7.16359e-10	-1.01089e-10
		0.00938	-1.33849e-10	-2.78307e-10		0.00938	2.80803e-12	-7.16359e-10	-1.01089e-10
		0.0094	-1.32913e-10	-2.78619e-10		0.0094	2.49602e-12	-7.16359e-10	-1.00465e-10
		0.00942	-1.30729e-10	-2.79867e-10		0.00942	1.56001e-12	-7.16359e-10	-1.01713e-10
		0.00944	-1.29169e-10	-2.80179e-10		0.00944	-6.24006e-13	-7.16359e-10	-1.02961e-10
		0.00946	-1.27921e-10	-2.81115e-10		0.00946	-3.43203e-12	-7.15735e-10	-1.02337e-10
		0.00948	-1.26985e-10	-2.82051e-10		0.00948	-4.99205e-12	-7.14487e-10	-1.03585e-10
		0.0095	-1.26673e-10	-2.81115e-10		0.0095	-8.42408e-12	-7.15735e-10	-1.04209e-10
		0.00952	-1.28857e-10	-2.80179e-10		0.00952	-9.36009e-12	-7.17607e-10	-1.03585e-10
		0.00954	-1.31977e-10	-2.79243e-10		0.00954	-9.98409e-12	-7.19479e-10	-1.04209e-10
		0.00956	-1.34785e-10	-2.77683e-10		0.00956	-1.09201e-11	-7.20727e-10	-1.05457e-10
		0.00958	-1.36969e-10	-2.77995e-10		0.00958	-1.09201e-11	-7.20727e-10	-1.04833e-10
		0.0096	-1.36033e-10	-2.78307e-10		0.0096	-9.98409e-12	-7.20727e-10	-1.04833e-10
		0.00962	-1.35409e-10	-2.78619e-10		0.00962	-8.73608e-12	-7.18855e-10	-1.06705e-10
		0.00964	-1.34785e-10	-2.78619e-10		0.00964	-8.73608e-12	-7.16983e-10	-1.06705e-10
		0.00966	-1.32601e-10	-2.78307e-10		0.00966	-8.42408e-12	-7.15111e-10	-1.06081e-10
		0.00968	-1.31041e-10	-2.77995e-10		0.00968	-9.67209e-12	-7.13239e-10	-1.08577e-10
		0.0097	-1.30729e-10	-2.77371e-10		0.0097	-9.98409e-12	-7.13863e-10	-1.08577e-10
		0.00972	-1.30729e-10	-2.76435e-10		0.00972	-1.02961e-11	-7.16359e-10	-1.09201e-10
		0.00974	-1.30417e-10	-2.76435e-10		0.00974	-9.36009e-12	-7.16359e-10	-1.09201e-10
		0.00976	-1.29169e-10	-2.76435e-10		0.00976	-7.48807e-12	-7.15735e-10	-1.11073e-10
		0.00978	-1.28233e-10	-2.77059e-10		0.00978	-5.92806e-12	-7.16983e-10	-1.09825e-10
		0.0098	-1.26673e-10	-2.77371e-10		0.0098	-4.99205e-12	-7.17607e-10	-1.08577e-10
		0.00982	-1.25425e-10	-2.77059e-10		0.00982	-3.43203e-12	-7.19479e-10	-1.08577e-10
		0.00984	-1.25737e-10	-2.76747e-10		0.00984	-2.49602e-12	-7.21351e-10	-1.06705e-10
		0.00986	-1.25425e-10	-2.76435e-10		0.00986	-1.87202e-12	-7.23847e-10	-1.06705e-10
		0.00988	-1.26049e-10	-2.76747e-10		0.00988	-2.80803e-12	-7.24471e-10	-1.05457e-10
		0.0099	-1.26985e-10	-2.77995e-10		0.0099	-2.49602e-12	-7.22599e-10	-1.06081e-10
		0.00992	-1.26985e-10	-2.79555e-10		0.00992	-4.05604e-12	-7.22599e-10	-1.03585e-10
		0.00994	-1.27921e-10	-2.81427e-10		0.00994	-5.92806e-12	-7.20103e-10	-1.04209e-10
		0.00996	-1.29169e-10	-2.82363e-10		0.00996	-5.61605e-12	-7.19479e-10	-1.04833e-10
		0.00998	-1.30105e-10	-2.82363e-10		0.00998	-5.92806e-12	-7.18231e-10	-1.04209e-10
		0.01	-1.30417e-10	-2.82675e-10		0.01	-5.61605e-12	-7.16983e-10	-1.02337e-10
		0.01002	-1.30417e-10	-2.82675e-10		0.01002	-4.99205e-12	-7.16983e-10	-1.05457e-10
		0.01004	-1.30417e-10	-2.82363e-10		0.01004	-4.05604e-12	-7.14487e-10	-1.07953e-10
		0.01006	-1.30729e-10	-2.81739e-10		0.01006	-2.80803e-12	-7.15111e-10	-1.07953e-10
		0.01008	-1.31977e-10	-2.80491e-10		0.01008	-3.12003e-12	-7.15735e-10	-1.09201e-10
		0.0101	-1.32601e-10	-2.80803e-10		0.0101	-3.74404e-12	-7.16983e-10	-1.08577e-10
		0.01012	-1.32601e-10	-2.80491e-10		0.01012	-4.05604e-12	-7.16983e-10	-1.09201e-10
		0.01014	-1.32601e-10	-2.79867e-10		0.01014	-3.12003e-12	-7.15735e-10	-1.09201e-10
		0.01016	-1.33537e-10	-2.79867e-10		0.01016	-3.74404e-12	-7.16983e-10	-1.09825e-10
		0.01018	-1.34473e-10	-2.78619e-10		0.01018	-4.05604e-12	-7.16359e-10	-1.11073e-10
		0.0102	-1.35409e-10	-2.78619e-10		0.0102	-3.43203e-12	-7.14487e-10	-1.10449e-10
		0.01022	-1.35097e-10	-2.77995e-10		0.01022	-3.74404e-12	-7.13239e-10	-1.09825e-10
		0.01024	-1.34785e-10	-2.77371e-10		0.01024	-3.74404e-12	-7.13863e-10	-1.09201e-10
		0.01026	-1.33225e-10	-2.77059e-10		0.01026	-2.80803e-12	-7.11991e-10	-1.06705e-10
		0.01028	-1.32289e-10	-2.77059e-10		0.01028	-2.80803e-12	-7.14487e-10	-1.05457e-10
		0.0103	-1.31353e-10	-2.77059e-10		0.0103	-2.80803e-12	-7.15111e-10	-1.04209e-10
		0.01032	-1.31353e-10	-2.76747e-10		0.01032	-3.43203e-12	-7.15111e-10	-1.03585e-10
		0.01034	-1.32601e-10	-2.76747e-10		0.01034	-4.68004e-12	-7.14487e-10	-1.03585e-10
		0.01036	-1.33537e-10	-2.76747e-10		0.01036	-5.92806e-12	-7.16359e-10	-1.04209e-10
		0.01038	-1.35097e-10	-2.77371e-10		0.01038	-4.68004e-12	-7.17607e-10	-1.04833e-10
		0.0104	-1.35409e-10	-2.77059e-10		0.0104	-5.30405e-12	-7.20103e-10	-1.07329e-10
		0.01042	-1.35097e-10	-2.77683e-10		0.01042	-3.74404e-12	-7.19479e-10	-1.07329e-10
		0.01044	-1.35097e-10	-2.77683e-10		0.01044	-3.74404e-12	-7.19479e-10	-1.06705e-10
		0.01046	-1.34161e-10	-2.77683e-10		0.01046	-4.99205e-12	-7.18231e-10	-1.06705e-10
		0.01048	-1.33537e-10	-2.77995e-10		0.01048	-4.36804e-12	-7.17607e-10	-1.06081e-10
		0.0105	-1.32601e-10	-2.78619e-10		0.0105	-4.99205e-12	-7.18231e-10	-1.07329e-10
		0.01052	-1.32601e-10	-2.78931e-10		0.01052	-5.30405e-12	-7.18855e-10	-1.07329e-10
		0.01054	-1.32913e-10	-2.79555e-10		0.01054	-5.61605e-12	-7.18231e-10	-1.07329e-10
		0.01056	-1.32913e-10	-2.80179e-10		0.01056	-6.24006e-12	-7.16983e-10	-1.06705e-10
		0.01058	-1.31977e-10	-2.81427e-10		0.01058	-6.24006e-12	-7.16359e-10	-1.04833e-10
		0.0106	-1.31041e-10	-2.82363e-10		0.0106	-5.30405e-12	-7.15735e-10	-1.04833e-10
		0.01062	-1.30417e-10	-2.82363e-10		0.01062	-4.36804e-12	-7.15111e-10	-1.04833e-10
		0.01064	-1.29169e-10	-2.82987e-10		0.01064	-3.74404e-12	-7.15111e-10	-1.04209e-10
		0.01066	-1.30105e-10	-2.82675e-10		0.01066	-3.43203e-12	-7.13863e-10	-1.07329e-10
		0.01068	-1.31353e-10	-2.83299e-10		0.01068	-2.80803e-12	-7.12615e-10	-1.09201e-10
		0.0107	-1.33225e-10	-2.82987e-10		0.0107	-4.36804e-12	-7.14487e-10	-1.09201e-10
		0.01072	-1.34785e-10	-2.82675e-10		0.01072	-4.68004e-12	-7.15735e-10	-1.09825e-10
		0.01074	-1.35097e-10	-2.82051e-10		0.01074	-5.30405e-12	-7.18231e-10	-1.09201e-10
		0.01076	-1.34161e-10	-2.81115e-10		0.01076	-4.68004e-12	-7.18231e-10	-1.08577e-10
		0.01078	-1.33849e-10	-2.80491e-10		0.01078	-4.05604e-12	-7.17607e-10	-1.07329e-10
		0.0108	-1.32601e-10	-2.81115e-10		0.0108	-2.49602e-12	-7.16359e-10	-1.06081e-10
		0.01082	-1.31665e-10	-2.80491e-10		0.01082	-2.80803e-12	-7.16359e-10	-1.06081e-10
		0.01084	-1.31665e-10	-2.80179e-10		0.01084	-2.49602e-12	-7.13863e-10	-1.06705e-10
		0.01086	-1.33225e-10	-2.79867e-10		0.01086	-3.74404e-12	-7.12615e-10	-1.06081e-10
		0.01088	-1.34161e-10	-2.77995e-10		0.01088	-4.36804e-12	-7.13863e-10	-1.07329e-10
		0.0109	-1.35409e-10	-2.77683e-10		0.0109	-4.99205e-12	-7.15111e-10	-1.09201e-10
		0.01092	-1.35721e-10	-2.77059e-10		0.01092	-4.36804e-12	-7.13863e-10	-1.07953e-10
		0.01094	-1.36345e-10	-2.78619e-10		0.01094	-4.05604e-12	-7.14487e-10	-1.09201e-10
		0.01096	-1.36657e-10	-2.80179e-10		0.01096	-2.18402e-12	-7.13863e-10	-1.07953e-10
		0.01098	-1.34473e-10	-2.81427e-10		0.01098	-6.24006e-13	-7.14487e-10	-1.07953e-10
		0.011	-1.34161e-10	-2.81115e-10		0.011	3.12003e-13	-7.13239e-10	-1.07953e-10
		0.01102	-1.34161e-10	-2.81427e-10		0.01102	9.36009e-13	-7.13863e-10	-1.09201e-10
		0.01104	-1.35409e-10	-2.80803e-10		0.01104	1.24801e-12	-7.15111e-10	-1.10449e-10
		0.01106	-1.34473e-10	-2.79243e-10		0.01106	0	-7.15735e-10	-1.10449e-10
		0.01108	-1.34473e-10	-2.79867e-10		0.01108	-9.36009e-13	-7.18231e-10	-1.09825e-10
		0.0111	-1.34473e-10	-2.81115e-10		0.0111	-1.87202e-12	-7.18855e-10	-1.07953e-10
		0.01112	-1.34785e-10	-2.82363e-10		0.01112	-2.80803e-12	-7.16983e-10	-1.07953e-10
		0.01114	-1.36033e-10	-2.82987e-10		0.01114	-3.43203e-12	-7.17607e-10	-1.06081e-10
		0.01116	-1.37593e-10	-2.82675e-10		0.01116	-4.05604e-12	-7.15735e-10	-1.06081e-10
		0.01118	-1.38529e-10	-2.82363e-10		0.01118	-4.68004e-12	-7.16983e-10	-1.06081e-10
		0.0112	-1.40713e-10	-2.82675e-10		0.0112	-4.99205e-12	-7.15111e-10	-1.04833e-10
		0.01122	-1.41337e-10	-2.82363e-10		0.01122	-5.30405e-12	-7.13863e-10	-1.07329e-10
		0.01124	-1.42273e-10	-2.81115e-10		0.01124	-4.68004e-12	-7.11367e-10	-1.06705e-10
		0.01126	-1.41649e-10	-2.79867e-10		0.01126	-4.05604e-12	-7.10743e-10	-1.08577e-10
		0.01128	-1.40401e-10	-2.79243e-10		0.01128	-4.68004e-12	-7.10119e-10	-1.09825e-10
		0.0113	-1.36033e-10	-2.79555e-10		0.0113	-4.99205e-12	-7.09495e-10	-1.09825e-10
		0.01132	-1.33225e-10	-2.80179e-10		0.01132	-5.30405e-12	-7.10119e-10	-1.11073e-10
		0.01134	-1.30729e-10	-2.81739e-10		0.01134	-4.36804e-12	-7.13239e-10	-1.11697e-10
		0.01136	-1.28857e-10	-2.82363e-10		0.01136	-3.74404e-12	-7.15111e-10	-1.12321e-10
		0.01138	-1.28545e-10	-2.82675e-10		0.01138	-2.49602e-12	-7.17607e-10	-1.14817e-10
		0.0114	-1.29481e-10	-2.83923e-10		0.0114	-9.36009e-13	-7.16983e-10	-1.12321e-10
		0.01142	-1.30417e-10	-2.84235e-10		0.01142	9.36009e-13	-7.18855e-10	-1.11073e-10
		0.01144	-1.32289e-10	-2.84547e-10		0.01144	1.87202e-12	-7.17607e-10	-1.08577e-10
		0.01146	-1.33225e-10	-2.85483e-10		0.01146	1.87202e-12	-7.17607e-10	-1.09201e-10
		0.01148	-1.33849e-10	-2.85795e-10		0.01148	9.36009e-13	-7.16359e-10	-1.07953e-10
		0.0115	-1.33849e-10	-2.86107e-10		0.0115	-9.36009e-13	-7.15735e-10	-1.09201e-10
		0.01152	-1.35097e-10	-2.85795e-10		0.01152	-2.49602e-12	-7.17607e-10	-1.11073e-10
		0.01154	-1.36969e-10	-2.86107e-10		0.01154	-4.05604e-12	-7.17607e-10	-1.12321e-10
		0.01156	-1.38841e-10	-2.84859e-10		0.01156	-3.74404e-12	-7.18855e-10	-1.12321e-10
		0.01158	-1.40401e-10	-2.83923e-10		0.01158	-4.05604e-12	-7.19479e-10	-1.13569e-10
		0.0116	-1.40089e-10	-2.81739e-10		0.0116	-3.43203e-12	-7.20103e-10	-1.10449e-10
		0.01162	-1.38841e-10	-2.80803e-10		0.01162	-3.12003e-12	-7.20727e-10	-1.09201e-10
		0.01164	-1.36657e-10	-2.80803e-10		0.01164	-2.49602e-12	-7.21351e-10	-1.07953e-10
		0.01166	-1.33537e-10	-2.81115e-10		0.01166	-1.87202e-12	-7.20727e-10	-1.08577e-10
		0.01168	-1.32601e-10	-2.80803e-10		0.01168	-1.24801e-12	-7.18231e-10	-1.07329e-10
		0.0117	-1.33225e-10	-2.81427e-10		0.0117	-1.87202e-12	-7.17607e-10	-1.09201e-10
		0.01172	-1.33849e-10	-2.81739e-10		0.01172	-2.49602e-12	-7.18231e-10	-1.11073e-10
		0.01174	-1.35409e-10	-2.81427e-10		0.01174	-3.74404e-12	-7.16983e-10	-1.10449e-10
		0.01176	-1.35409e-10	-2.81739e-10		0.01176	-3.74404e-12	-7.16359e-10	-1.09825e-10
		0.01178	-1.35409e-10	-2.80491e-10		0.01178	-4.68004e-12	-7.20727e-10	-1.11073e-10
		0.0118	-1.35097e-10	-2.79243e-10		0.0118	-4.36804e-12	-7.20103e-10	-1.10449e-10
		0.01182	-1.35097e-10	-2.77995e-10		0.01182	-4.99205e-12	-7.19479e-10	-1.11073e-10
		0.01184	-1.34473e-10	-2.75811e-10		0.01184	-4.36804e-12	-7.18231e-10	-1.11697e-10
		0.01186	-1.34473e-10	-2.74251e-10		0.01186	-4.68004e-12	-7.17607e-10	-1.13569e-10
		0.01188	-1.34161e-10	-2.73627e-10		0.01188	-4.68004e-12	-7.17607e-10	-1.12321e-10
		0.0119	-1.35409e-10	-2.72691e-10		0.0119	-3.74404e-12	-7.16359e-10	-1.12321e-10
		0.01192	-1.35097e-10	-2.72379e-10		0.01192	-3.43203e-12	-7.16359e-10	-1.11697e-10
		0.01194	-1.35097e-10	-2.73315e-10		0.01194	-3.74404e-12	-7.16359e-10	-1.09201e-10
		0.01196	-1.34161e-10	-2.73627e-10		0.01196	-3.74404e-12	-7.16983e-10	-1.09825e-10
		0.01198	-1.34161e-10	-2.74563e-10		0.01198	-3.43203e-12	-7.17607e-10	-1.08577e-10
		0.012	-1.34161e-10	-2.73627e-10		0.012	-2.80803e-12	-7.16983e-10	-1.09825e-10
		0.01202	-1.35097e-10	-2.74563e-10		0.01202	-1.87202e-12	-7.16359e-10	-1.11073e-10
		0.01204	-1.38217e-10	-2.74251e-10		0.01204	-1.56001e-12	-7.17607e-10	-1.11697e-10
		0.01206	-1.39465e-10	-2.74875e-10		0.01206	-9.36009e-13	-7.18231e-10	-1.11697e-10
		0.01208	-1.40089e-10	-2.75187e-10		0.01208	-9.36009e-13	-7.20103e-10	-1.13569e-10
		0.0121	-1.40713e-10	-2.76123e-10		0.0121	-9.36009e-13	-7.20727e-10	-1.11697e-10
		0.01212	-1.39465e-10	-2.77683e-10		0.01212	-1.87202e-12	-7.21351e-10	-1.08577e-10
		0.01214	-1.39153e-10	-2.78307e-10		0.01214	-1.87202e-12	-7.22599e-10	-1.08577e-10
		0.01216	-1.37905e-10	-2.78619e-10		0.01216	-3.43203e-12	-7.18855e-10	-1.08577e-10
		0.01218	-1.37905e-10	-2.77371e-10		0.01218	-2.80803e-12	-7.17607e-10	-1.09201e-10
		0.0122	-1.38217e-10	-2.75811e-10		0.0122	-3.43203e-12	-7.15111e-10	-1.10449e-10
		0.01222	-1.38529e-10	-2.74563e-10		0.01222	-3.43203e-12	-7.15111e-10	-1.11073e-10
		0.01224	-1.39777e-10	-2.73003e-10		0.01224	-3.12003e-12	-7.15111e-10	-1.12321e-10
		0.01226	-1.40401e-10	-2.72691e-10		0.01226	-2.18402e-12	-7.13863e-10	-1.11697e-10
		0.01228	-1.39777e-10	-2.72691e-10		0.01228	-9.36009e-13	-7.15111e-10	-1.11073e-10
		0.0123	-1.39465e-10	-2.73939e-10		0.0123	-9.36009e-13	-7.15111e-10	-1.11697e-10
		0.01232	-1.38217e-10	-2.74875e-10		0.01232	6.24006e-13	-7.15735e-10	-1.11073e-10
		0.01234	-1.36969e-10	-2.75811e-10		0.01234	3.12003e-13	-7.18231e-10	-1.11073e-10
		0.01236	-1.37281e-10	-2.76747e-10		0.01236	0	-7.19479e-10	-1.10449e-10
		0.01238	-1.36657e-10	-2.77683e-10		0.01238	-6.24006e-13	-7.20727e-10	-1.09825e-10
		0.0124	-1.37281e-10	-2.77683e-10		0.0124	-1.24801e-12	-7.21351e-10	-1.09201e-10
		0.01242	-1.35721e-10	-2.77683e-10		0.01242	-2.18402e-12	-7.23223e-10	-1.10449e-10
		0.01244	-1.34161e-10	-2.78619e-10		0.01244	-2.49602e-12	-7.23847e-10	-1.09825e-10
		0.01246	-1.31353e-10	-2.77995e-10		0.01246	-3.74404e-12	-7.24471e-10	-1.09201e-10
		0.01248	-1.30417e-10	-2.78307e-10		0.01248	-4.05604e-12	-7.23223e-10	-1.07329e-10
		0.0125	-1.28857e-10	-2.77683e-10		0.0125	-4.99205e-12	-7.23847e-10	-1.07953e-10
		0.01252	-1.29169e-10	-2.77059e-10		0.01252	-4.68004e-12	-7.21351e-10	-1.06705e-10
		0.01254	-1.29793e-10	-2.77371e-10		0.01254	-5.30405e-12	-7.22599e-10	-1.07329e-10
		0.01256	-1.31041e-10	-2.76747e-10		0.01256	-5.61605e-12	-7.22599e-10	-1.06705e-10
		0.01258	-1.32913e-10	-2.77059e-10		0.01258	-4.05604e-12	-7.22599e-10	-1.07953e-10
		0.0126	-1.35409e-10	-2.77371e-10		0.0126	-3.12003e-12	-7.23223e-10	-1.06705e-10
		0.01262	-1.36657e-10	-2.78619e-10		0.01262	-2.49602e-12	-7.21351e-10	-1.06081e-10
		0.01264	-1.38217e-10	-2.78931e-10		0.01264	-9.36009e-13	-7.18855e-10	-1.06081e-10
		0.01266	-1.37905e-10	-2.79867e-10		0.01266	-3.12003e-13	-7.17607e-10	-1.06081e-10
		0.01268	-1.38217e-10	-2.79555e-10		0.01268	-9.36009e-13	-7.16359e-10	-1.08577e-10
		0.0127	-1.38217e-10	-2.77995e-10		0.0127	-1.87202e-12	-7.16983e-10	-1.10449e-10
		0.01272	-1.36969e-10	-2.77059e-10		0.01272	-3.12003e-12	-7.18231e-10	-1.11697e-10
		0.01274	-1.36969e-10	-2.76123e-10		0.01274	-3.12003e-12	-7.18855e-10	-1.14193e-10
		0.01276	-1.35721e-10	-2.76747e-10		0.01276	-2.49602e-12	-7.19479e-10	-1.13569e-10
		0.01278	-1.35097e-10	-2.77371e-10		0.01278	-1.87202e-12	-7.20103e-10	-1.13569e-10
		0.0128	-1.34473e-10	-2.78619e-10		0.0128	-6.24006e-13	-7.20727e-10	-1.14193e-10
		0.01282	-1.33225e-10	-2.80803e-10		0.01282	1.56001e-12	-7.20103e-10	-1.12321e-10
		0.01284	-1.31353e-10	-2.81115e-10		0.01284	1.56001e-12	-7.21351e-10	-1.12945e-10
		0.01286	-1.30105e-10	-2.82363e-10		0.01286	1.56001e-12	-7.20103e-10	-1.12321e-10
		0.01288	-1.29793e-10	-2.81739e-10		0.01288	6.24006e-13	-7.20103e-10	-1.13569e-10
		0.0129	-1.30417e-10	-2.81427e-10		0.0129	-3.12003e-13	-7.21351e-10	-1.14817e-10
		0.01292	-1.31665e-10	-2.80179e-10		0.01292	-9.36009e-13	-7.18855e-10	-1.14193e-10
		0.01294	-1.31977e-10	-2.79555e-10		0.01294	-1.87202e-12	-7.18231e-10	-1.14193e-10
		0.01296	-1.31353e-10	-2.78931e-10		0.01296	-2.80803e-12	-7.16983e-10	-1.12321e-10
		0.01298	-1.30105e-10	-2.77683e-10		0.01298	-3.43203e-12	-7.16983e-10	-1.13569e-10
		0.013	-1.29169e-10	-2.77995e-10		0.013	-3.74404e-12	-7.15735e-10	-1.12945e-10
		0.01302	-1.28233e-10	-2.77059e-10		0.01302	-2.80803e-12	-7.16359e-10	-1.14193e-10
		0.01304	-1.28233e-10	-2.77371e-10		0.01304	-2.18402e-12	-7.17607e-10	-1.14193e-10
		0.01306	-1.28545e-10	-2.77371e-10		0.01306	-1.87202e-12	-7.20103e-10	-1.11697e-10
		0.01308	-1.27921e-10	-2.77371e-10		0.01308	-1.87202e-12	-7.20727e-10	-1.11073e-10
		0.0131	-1.29481e-10	-2.77371e-10		0.0131	-1.24801e-12	-7.23223e-10	-1.08577e-10
		0.01312	-1.28545e-10	-2.76435e-10		0.01312	-1.24801e-12	-7.22599e-10	-1.07329e-10
		0.01314	-1.28857e-10	-2.74875e-10		0.01314	-2.49602e-12	-7.22599e-10	-1.06081e-10
		0.01316	-1.28857e-10	-2.75499e-10		0.01316	-1.87202e-12	-7.20103e-10	-1.06705e-10
		0.01318	-1.30417e-10	-2.75811e-10		0.01318	-1.56001e-12	-7.20103e-10	-1.07953e-10
		0.0132	-1.32913e-10	-2.76435e-10		0.0132	-2.18402e-12	-7.17607e-10	-1.09825e-10
		0.01322	-1.33537e-10	-2.75499e-10		0.01322	-2.49602e-12	-7.18231e-10	-1.11073e-10
		0.01324	-1.35409e-10	-2.75187e-10		0.01324	-1.56001e-12	-7.17607e-10	-1.11073e-10
		0.01326	-1.36033e-10	-2.75499e-10		0.01326	-1.87202e-12	-7.18855e-10	-1.13569e-10
		0.01328	-1.36657e-10	-2.76435e-10		0.01328	-9.36009e-13	-7.18855e-10	-1.13569e-10
		0.0133	-1.34785e-10	-2.77371e-10		0.0133	-1.24801e-12	-7.18231e-10	-1.14193e-10
		0.01332	-1.33225e-10	-2.78931e-10		0.01332	-2.80803e-12	-7.17607e-10	-1.11073e-10
		0.01334	-1.32913e-10	-2.78619e-10		0.01334	-4.05604e-12	-7.18231e-10	-1.08577e-10
		0.01336	-1.32913e-10	-2.78619e-10		0.01336	-4.99205e-12	-7.18231e-10	-1.09201e-10
		0.01338	-1.32913e-10	-2.78307e-10		0.01338	-5.61605e-12	-7.18855e-10	-1.09201e-10
		0.0134	-1.33225e-10	-2.76747e-10		0.0134	-5.30405e-12	-7.20103e-10	-1.11073e-10
		0.01342	-1.31977e-10	-2.76747e-10		0.01342	-3.74404e-12	-7.19479e-10	-1.11073e-10
		0.01344	-1.29793e-10	-2.76435e-10		0.01344	-3.12003e-12	-7.18231e-10	-1.11697e-10
		0.01346	-1.28857e-10	-2.75187e-10		0.01346	-2.18402e-12	-7.17607e-10	-1.12321e-10
		0.01348	-1.28233e-10	-2.74875e-10		0.01348	-2.18402e-12	-7.17607e-10	-1.12321e-10
		0.0135	-1.28233e-10	-2.75499e-10		0.0135	-2.49602e-12	-7.18231e-10	-1.13569e-10
		0.01352	-1.28857e-10	-2.74563e-10		0.01352	-2.80803e-12	-7.18231e-10	-1.12945e-10
		0.01354	-1.29169e-10	-2.73939e-10		0.01354	-2.49602e-12	-7.18855e-10	-1.12945e-10
		0.01356	-1.30105e-10	-2.72691e-10		0.01356	-1.56001e-12	-7.18855e-10	-1.12945e-10
		0.01358	-1.31041e-10	-2.72067e-10		0.01358	-9.36009e-13	-7.21975e-10	-1.11073e-10
		0.0136	-1.32289e-10	-2.71755e-10		0.0136	-6.24006e-13	-7.21975e-10	-1.10449e-10
		0.01362	-1.32289e-10	-2.72067e-10		0.01362	-9.36009e-13	-7.21351e-10	-1.08577e-10
		0.01364	-1.33537e-10	-2.73627e-10		0.01364	-9.36009e-13	-7.20727e-10	-1.08577e-10
		0.01366	-1.33849e-10	-2.75499e-10		0.01366	-1.87202e-12	-7.20103e-10	-1.07329e-10
		0.01368	-1.35097e-10	-2.77683e-10		0.01368	-2.49602e-12	-7.19479e-10	-1.06705e-10
		0.0137	-1.36657e-10	-2.78619e-10		0.0137	-2.18402e-12	-7.18231e-10	-1.08577e-10
		0.01372	-1.36969e-10	-2.78619e-10		0.01372	-2.80803e-12	-7.18855e-10	-1.11697e-10
		0.01374	-1.37905e-10	-2.78307e-10		0.01374	-3.43203e-12	-7.18231e-10	-1.12321e-10
		0.01376	-1.37905e-10	-2.78931e-10		0.01376	-3.74404e-12	-7.18855e-10	-1.14193e-10
		0.01378	-1.37281e-10	-2.79243e-10		0.01378	-4.05604e-12	-7.18855e-10	-1.14817e-10
		0.0138	-1.36345e-10	-2.79867e-10		0.0138	-4.68004e-12	-7.19479e-10	-1.13569e-10
		0.01382	-1.34785e-10	-2.79243e-10		0.01382	-5.30405e-12	-7.20103e-10	-1.11073e-10
		0.01384	-1.34161e-10	-2.80179e-10		0.01384	-6.24006e-12	-7.20103e-10	-1.09825e-10
		0.01386	-1.34473e-10	-2.80491e-10		0.01386	-5.92806e-12	-7.20727e-10	-1.08577e-10
		0.01388	-1.34785e-10	-2.80491e-10		0.01388	-5.92806e-12	-7.19479e-10	-1.07953e-10
		0.0139	-1.36033e-10	-2.80491e-10		0.0139	-5.92806e-12	-7.18855e-10	-1.06705e-10
		0.01392	-1.36657e-10	-2.80179e-10		0.01392	-5.61605e-12	-7.20727e-10	-1.06705e-10
		0.01394	-1.35409e-10	-2.80179e-10		0.01394	-4.68004e-12	-7.23847e-10	-1.05457e-10
		0.01396	-1.35409e-10	-2.80803e-10		0.01396	-4.99205e-12	-7.23223e-10	-1.06081e-10
		0.01398	-1.35409e-10	-2.82051e-10		0.01398	-4.68004e-12	-7.22599e-10	-1.06081e-10
		0.014	-1.34785e-10	-2.82363e-10		0.014	-5.30405e-12	-7.20103e-10	-1.07953e-10
		0.01402	-1.34473e-10	-2.80803e-10		0.01402	-4.68004e-12	-7.20727e-10	-1.09201e-10
		0.01404	-1.34473e-10	-2.82051e-10		0.01404	-4.36804e-12	-7.19479e-10	-1.10449e-10
		0.01406	-1.34161e-10	-2.79867e-10		0.01406	-3.43203e-12	-7.18231e-10	-1.10449e-10
		0.01408	-1.34473e-10	-2.80491e-10		0.01408	-3.12003e-12	-7.18855e-10	-1.11073e-10
		0.0141	-1.33225e-10	-2.79555e-10		0.0141	-2.49602e-12	-7.19479e-10	-1.09825e-10
		0.01412	-1.32289e-10	-2.79867e-10		0.01412	-2.80803e-12	-7.21351e-10	-1.10449e-10
		0.01414	-1.31041e-10	-2.80803e-10		0.01414	-4.05604e-12	-7.21975e-10	-1.08577e-10
		0.01416	-1.30417e-10	-2.81427e-10		0.01416	-5.30405e-12	-7.23223e-10	-1.09825e-10
		0.01418	-1.30105e-10	-2.82363e-10		0.01418	-4.99205e-12	-7.23223e-10	-1.10449e-10
		0.0142	-1.30417e-10	-2.81427e-10		0.0142	-4.36804e-12	-7.23223e-10	-1.09825e-10
		0.01422	-1.31353e-10	-2.80491e-10		0.01422	-2.80803e-12	-7.22599e-10	-1.11697e-10
		0.01424	-1.31977e-10	-2.79243e-10		0.01424	-2.49602e-12	-7.22599e-10	-1.11697e-10
		0.01426	-1.31353e-10	-2.78307e-10		0.01426	-1.87202e-12	-7.22599e-10	-1.10449e-10
		0.01428	-1.29793e-10	-2.77371e-10		0.01428	-2.49602e-12	-7.19479e-10	-1.10449e-10
		0.0143	-1.29793e-10	-2.77059e-10		0.0143	-2.80803e-12	-7.20727e-10	-1.08577e-10
		0.01432	-1.27921e-10	-2.77059e-10		0.01432	-3.74404e-12	-7.20103e-10	-1.09825e-10
		0.01434	-1.27609e-10	-2.77059e-10		0.01434	-4.99205e-12	-7.21351e-10	-1.11073e-10
		0.01436	-1.27921e-10	-2.77059e-10		0.01436	-4.99205e-12	-7.18855e-10	-1.11697e-10
		0.01438	-1.28857e-10	-2.77059e-10		0.01438	-5.61605e-12	-7.21975e-10	-1.11697e-10
		0.0144	-1.30105e-10	-2.76123e-10		0.0144	-4.99205e-12	-7.24471e-10	-1.11073e-10
		0.01442	-1.31353e-10	-2.74875e-10		0.01442	-4.99205e-12	-7.23847e-10	-1.11697e-10
		0.01444	-1.31665e-10	-2.75187e-10		0.01444	-4.36804e-12	-7.25095e-10	-1.11697e-10
		0.01446	-1.32289e-10	-2.75187e-10		0.01446	-4.36804e-12	-7.23223e-10	-1.09825e-10
		0.01448	-1.31665e-10	-2.74875e-10		0.01448	-5.61605e-12	-7.21975e-10	-1.09201e-10
		0.0145	-1.30729e-10	-2.75187e-10		0.0145	-6.55206e-12	-7.21975e-10	-1.09825e-10
		0.01452	-1.30729e-10	-2.74251e-10		0.01452	-7.80007e-12	-7.20727e-10	-1.12321e-10
		0.01454	-1.31977e-10	-2.73315e-10		0.01454	-9.04808e-12	-7.20727e-10	-1.12945e-10
		0.01456	-1.34473e-10	-2.72067e-10		0.01456	-9.04808e-12	-7.19479e-10	-1.14193e-10
		0.01458	-1.36033e-10	-2.72067e-10		0.01458	-8.42408e-12	-7.18855e-10	-1.17937e-10
		0.0146	-1.37281e-10	-2.71755e-10		0.0146	-7.80007e-12	-7.20103e-10	-1.16689e-10
		0.01462	-1.37593e-10	-2.72379e-10		0.01462	-7.17607e-12	-7.20727e-10	-1.16065e-10
		0.01464	-1.36033e-10	-2.72691e-10		0.01464	-6.55206e-12	-7.20727e-10	-1.14817e-10
		0.01466	-1.35409e-10	-2.73315e-10		0.01466	-6.24006e-12	-7.21351e-10	-1.11697e-10
		0.01468	-1.34785e-10	-2.73627e-10		0.01468	-5.61605e-12	-7.22599e-10	-1.12321e-10
		0.0147	-1.34473e-10	-2.73939e-10		0.0147	-4.68004e-12	-7.21975e-10	-1.11073e-10
		0.01472	-1.34785e-10	-2.74563e-10		0.01472	-4.99205e-12	-7.21351e-10	-1.09825e-10
		0.01474	-1.36345e-10	-2.75187e-10		0.01474	-4.36804e-12	-7.22599e-10	-1.10449e-10
		0.01476	-1.36033e-10	-2.75499e-10		0.01476	-4.05604e-12	-7.22599e-10	-1.09825e-10
		0.01478	-1.37281e-10	-2.76747e-10		0.01478	-3.12003e-12	-7.21351e-10	-1.07329e-10
		0.0148	-1.37905e-10	-2.77683e-10		0.0148	-1.87202e-12	-7.20103e-10	-1.05457e-10
		0.01482	-1.39465e-10	-2.77371e-10		0.01482	-1.87202e-12	-7.20103e-10	-1.05457e-10
		0.01484	-1.39465e-10	-2.77683e-10		0.01484	-1.56001e-12	-7.18855e-10	-1.07953e-10
		0.01486	-1.41025e-10	-2.76123e-10		0.01486	-6.24006e-13	-7.18855e-10	-1.09825e-10
		0.01488	-1.42585e-10	-2.74875e-10		0.01488	-6.24006e-13	-7.19479e-10	-1.10449e-10
		0.0149	-1.43833e-10	-2.73939e-10		0.0149	-9.36009e-13	-7.18231e-10	-1.11697e-10
		0.01492	-1.44457e-10	-2.74251e-10		0.01492	-9.36009e-13	-7.18855e-10	-1.11073e-10
		0.01494	-1.44145e-10	-2.74563e-10		0.01494	-3.12003e-12	-7.20727e-10	-1.10449e-10
		0.01496	-1.43833e-10	-2.76123e-10		0.01496	-4.05604e-12	-7.20727e-10	-1.09825e-10
		0.01498	-1.42897e-10	-2.76435e-10		0.01498	-5.61605e-12	-7.21975e-10	-1.11073e-10
		0.015	-1.42273e-10	-2.77059e-10		0.015	-5.61605e-12	-7.22599e-10	-1.11697e-10
		0.01502	-1.42273e-10	-2.77059e-10		0.01502	-6.86406e-12	-7.24471e-10	-1.12321e-10
		0.01504	-1.41649e-10	-2.77059e-10		0.01504	-6.24006e-12	-7.25719e-10	-1.12321e-10
		0.01506	-1.42273e-10	-2.76435e-10		0.01506	-5.92806e-12	-7.25719e-10	-1.12321e-10
		0.01508	-1.42585e-10	-2.77995e-10		0.01508	-4.36804e-12	-7.25095e-10	-1.11697e-10
		0.0151	-1.43209e-10	-2.79243e-10		0.0151	-3.43203e-12	-7.23223e-10	-1.11697e-10
		0.01512	-1.43209e-10	-2.80179e-10		0.01512	-3.12003e-12	-7.20727e-10	-1.12321e-10
		0.01514	-1.43521e-10	-2.81427e-10		0.01514	-3.74404e-12	-7.18855e-10	-1.13569e-10
		0.01516	-1.44145e-10	-2.82363e-10		0.01516	-3.74404e-12	-7.16359e-10	-1.14193e-10
		0.01518	-1.43521e-10	-2.81427e-10		0.01518	-3.74404e-12	-7.13239e-10	-1.15441e-10
		0.0152	-1.44145e-10	-2.80491e-10		0.0152	-4.36804e-12	-7.13239e-10	-1.17937e-10
		0.01522	-1.43833e-10	-2.79555e-10		0.01522	-4.99205e-12	-7.13863e-10	-1.15441e-10
		0.01524	-1.43521e-10	-2.79555e-10		0.01524	-5.61605e-12	-7.14487e-10	-1.17313e-10
		0.01526	-1.44145e-10	-2.80179e-10		0.01526	-6.24006e-12	-7.16359e-10	-1.14817e-10
		0.01528	-1.43521e-10	-2.82363e-10		0.01528	-7.80007e-12	-7.18231e-10	-1.14817e-10
		0.0153	-1.42585e-10	-2.84235e-10		0.0153	-7.17607e-12	-7.19479e-10	-1.13569e-10
		0.01532	-1.42585e-10	-2.85795e-10		0.01532	-7.48807e-12	-7.19479e-10	-1.14193e-10
		0.01534	-1.43209e-10	-2.87043e-10		0.01534	-9.36009e-12	-7.19479e-10	-1.11073e-10
		0.01536	-1.45393e-10	-2.85795e-10		0.01536	-9.36009e-12	-7.19479e-10	-1.09825e-10
		0.01538	-1.47577e-10	-2.84547e-10		0.01538	-9.04808e-12	-7.20103e-10	-1.10449e-10
		0.0154	-1.48513e-10	-2.84235e-10		0.0154	-8.73608e-12	-7.20103e-10	-1.09825e-10
		0.01542	-1.48201e-10	-2.82987e-10		0.01542	-8.11208e-12	-7.20103e-10	-1.06081e-10
		0.01544	-1.47265e-10	-2.82363e-10		0.01544	-7.48807e-12	-7.19479e-10	-1.06705e-10
		0.01546	-1.45705e-10	-2.82363e-10		0.01546	-8.11208e-12	-7.18855e-10	-1.06705e-10
		0.01548	-1.44457e-10	-2.82363e-10		0.01548	-8.11208e-12	-7.19479e-10	-1.07953e-10
		0.0155	-1.43521e-10	-2.82051e-10		0.0155	-9.04808e-12	-7.20727e-10	-1.07953e-10
		0.01552	-1.43209e-10	-2.80491e-10		0.01552	-9.04808e-12	-7.21351e-10	-1.07953e-10
		0.01554	-1.43521e-10	-2.80491e-10		0.01554	-9.04808e-12	-7.21351e-10	-1.09201e-10
		0.01556	-1.43833e-10	-2.79867e-10		0.01556	-7.48807e-12	-7.20103e-10	-1.09201e-10
		0.01558	-1.43833e-10	-2.80179e-10		0.01558	-6.24006e-12	-7.21351e-10	-1.07329e-10
		0.0156	-1.41961e-10	-2.82363e-10		0.0156	-5.92806e-12	-7.21351e-10	-1.06705e-10
		0.01562	-1.40089e-10	-2.84235e-10		0.01562	-5.30405e-12	-7.21351e-10	-1.07953e-10
		0.01564	-1.37593e-10	-2.86419e-10		0.01564	-4.68004e-12	-7.20103e-10	-1.06081e-10
		0.01566	-1.35409e-10	-2.87979e-10		0.01566	-5.30405e-12	-7.19479e-10	-1.07329e-10
		0.01568	-1.34473e-10	-2.87667e-10		0.01568	-5.30405e-12	-7.16983e-10	-1.06081e-10
		0.0157	-1.34161e-10	-2.85171e-10		0.0157	-5.30405e-12	-7.16983e-10	-1.08577e-10
		0.01572	-1.33849e-10	-2.82987e-10		0.01572	-6.55206e-12	-7.15735e-10	-1.09201e-10
		0.01574	-1.34785e-10	-2.81427e-10		0.01574	-7.17607e-12	-7.15735e-10	-1.09825e-10
		0.01576	-1.35409e-10	-2.81427e-10		0.01576	-7.48807e-12	-7.16983e-10	-1.11073e-10
		0.01578	-1.35721e-10	-2.80491e-10		0.01578	-7.80007e-12	-7.18855e-10	-1.10449e-10
		0.0158	-1.34785e-10	-2.80179e-10		0.0158	-7.48807e-12	-7.18855e-10	-1.10449e-10
		0.01582	-1.34785e-10	-2.79867e-10		0.01582	-7.80007e-12	-7.20727e-10	-1.09201e-10
		0.01584	-1.34473e-10	-2.80179e-10		0.01584	-5.92806e-12	-7.21351e-10	-1.11073e-10
		0.01586	-1.35097e-10	-2.80179e-10		0.01586	-5.92806e-12	-7.22599e-10	-1.09825e-10
		0.01588	-1.36345e-10	-2.79555e-10		0.01588	-5.61605e-12	-7.22599e-10	-1.11697e-10
		0.0159	-1.38529e-10	-2.79243e-10		0.0159	-5.30405e-12	-7.22599e-10	-1.12321e-10
		0.01592	-1.39777e-10	-2.79243e-10		0.01592	-4.36804e-12	-7.21351e-10	-1.12945e-10
		0.01594	-1.40401e-10	-2.78931e-10		0.01594	-4.05604e-12	-7.23847e-10	-1.11697e-10
		0.01596	-1.40401e-10	-2.81739e-10		0.01596	-3.43203e-12	-7.21975e-10	-1.12945e-10
		0.01598	-1.39465e-10	-2.82363e-10		0.01598	-3.12003e-12	-7.19479e-10	-1.11697e-10
		0.016	-1.39465e-10	-2.83299e-10		0.016	-3.43203e-12	-7.20727e-10	-1.14193e-10
		0.01602	-1.38841e-10	-2.84547e-10		0.01602	-3.12003e-12	-7.19479e-10	-1.12945e-10
		0.01604	-1.39153e-10	-2.83923e-10		0.01604	-4.68004e-12	-7.18231e-10	-1.12321e-10
		0.01606	-1.38841e-10	-2.83611e-10		0.01606	-4.05604e-12	-7.18231e-10	-1.11697e-10
		0.01608	-1.39465e-10	-2.83299e-10		0.01608	-4.99205e-12	-7.15735e-10	-1.12321e-10
		0.0161	-1.39777e-10	-2.82675e-10		0.0161	-3.74404e-12	-7.16983e-10	-1.10449e-10
		0.01612	-1.39777e-10	-2.81115e-10		0.01612	-4.05604e-12	-7.18231e-10	-1.09825e-10
		0.01614	-1.40401e-10	-2.79243e-10		0.01614	-3.74404e-12	-7.17607e-10	-1.08577e-10
		0.01616	-1.40401e-10	-2.77683e-10		0.01616	-3.74404e-12	-7.18231e-10	-1.08577e-10
		0.01618	-1.40401e-10	-2.75811e-10		0.01618	-4.99205e-12	-7.18231e-10	-1.09201e-10
		0.0162	-1.41337e-10	-2.73627e-10		0.0162	-6.24006e-12	-7.19479e-10	-1.10449e-10
		0.01622	-1.41649e-10	-2.72379e-10		0.01622	-6.86406e-12	-7.18231e-10	-1.12321e-10
		0.01624	-1.42585e-10	-2.71755e-10		0.01624	-7.80007e-12	-7.18231e-10	-1.13569e-10
		0.01626	-1.44145e-10	-2.72691e-10		0.01626	-7.17607e-12	-7.17607e-10	-1.16065e-10
		0.01628	-1.45393e-10	-2.73627e-10		0.01628	-5.92806e-12	-7.17607e-10	-1.14817e-10
		0.0163	-1.45705e-10	-2.74251e-10		0.0163	-5.30405e-12	-7.16983e-10	-1.12945e-10
		0.01632	-1.46641e-10	-2.74563e-10		0.01632	-5.61605e-12	-7.17607e-10	-1.11073e-10
		0.01634	-1.45081e-10	-2.75499e-10		0.01634	-5.61605e-12	-7.16983e-10	-1.10449e-10
		0.01636	-1.44145e-10	-2.75499e-10		0.01636	-5.61605e-12	-7.18231e-10	-1.09825e-10
		0.01638	-1.42585e-10	-2.74875e-10		0.01638	-6.86406e-12	-7.18855e-10	-1.11073e-10
		0.0164	-1.40089e-10	-2.75499e-10		0.0164	-6.55206e-12	-7.17607e-10	-1.09201e-10
		0.01642	-1.40401e-10	-2.76123e-10		0.01642	-5.61605e-12	-7.18231e-10	-1.11073e-10
		0.01644	-1.38841e-10	-2.76435e-10		0.01644	-5.30405e-12	-7.18855e-10	-1.11073e-10
		0.01646	-1.37905e-10	-2.76435e-10		0.01646	-3.74404e-12	-7.20727e-10	-1.12945e-10
		0.01648	-1.38217e-10	-2.75811e-10		0.01648	-2.80803e-12	-7.20103e-10	-1.12321e-10
		0.0165	-1.37905e-10	-2.75499e-10		0.0165	-2.49602e-12	-7.21975e-10	-1.15441e-10
		0.01652	-1.37593e-10	-2.74563e-10		0.01652	-2.49602e-12	-7.23223e-10	-1.16065e-10
		0.01654	-1.37593e-10	-2.74563e-10		0.01654	-2.49602e-12	-7.22599e-10	-1.16689e-10
		0.01656	-1.37905e-10	-2.73627e-10		0.01656	-1.87202e-12	-7.23223e-10	-1.17937e-10
		0.01658	-1.37593e-10	-2.72691e-10		0.01658	-2.80803e-12	-7.23847e-10	-1.17937e-10
		0.0166	-1.37593e-10	-2.72379e-10		0.0166	-2.80803e-12	-7.24471e-10	-1.14817e-10
		0.01662	-1.36969e-10	-2.72067e-10		0.01662	-3.43203e-12	-7.23847e-10	-1.11697e-10
		0.01664	-1.36657e-10	-2.72379e-10		0.01664	-4.99205e-12	-7.23223e-10	-1.10449e-10
		0.01666	-1.37281e-10	-2.71131e-10		0.01666	-6.24006e-12	-7.20103e-10	-1.09201e-10
		0.01668	-1.37281e-10	-2.71755e-10		0.01668	-8.73608e-12	-7.17607e-10	-1.07953e-10
		0.0167	-1.36969e-10	-2.70507e-10		0.0167	-9.36009e-12	-7.16359e-10	-1.08577e-10
		0.01672	-1.37281e-10	-2.69259e-10		0.01672	-1.02961e-11	-7.17607e-10	-1.09825e-10
		0.01674	-1.37281e-10	-2.68011e-10		0.01674	-9.36009e-12	-7.17607e-10	-1.13569e-10
		0.01676	-1.36657e-10	-2.67075e-10		0.01676	-9.67209e-12	-7.17607e-10	-1.14193e-10
		0.01678	-1.36033e-10	-2.66138e-10		0.01678	-8.11208e-12	-7.20103e-10	-1.12945e-10
		0.0168	-1.35409e-10	-2.65514e-10		0.0168	-6.86406e-12	-7.19479e-10	-1.11073e-10
		0.01682	-1.36033e-10	-2.65514e-10		0.01682	-4.68004e-12	-7.20103e-10	-1.10449e-10
		0.01684	-1.36033e-10	-2.65826e-10		0.01684	-3.43203e-12	-7.21351e-10	-1.08577e-10
		0.01686	-1.37593e-10	-2.65826e-10		0.01686	-1.24801e-12	-7.21975e-10	-1.09825e-10
		0.01688	-1.38217e-10	-2.66763e-10		0.01688	-6.24006e-13	-7.23223e-10	-1.11073e-10
		0.0169	-1.38841e-10	-2.67075e-10		0.0169	-6.24006e-13	-7.25095e-10	-1.09201e-10
		0.01692	-1.39465e-10	-2.67699e-10		0.01692	-6.24006e-13	-7.24471e-10	-1.07953e-10
		0.01694	-1.38841e-10	-2.68323e-10		0.01694	-9.36009e-13	-7.23847e-10	-1.07329e-10
		0.01696	-1.39465e-10	-2.68947e-10		0.01696	-9.36009e-13	-7.21351e-10	-1.07329e-10
		0.01698	-1.37593e-10	-2.68635e-10		0.01698	-9.36009e-13	-7.21351e-10	-1.06705e-10
		0.017	-1.36969e-10	-2.68947e-10		0.017	-1.24801e-12	-7.20727e-10	-1.06081e-10
		0.01702	-1.36345e-10	-2.68947e-10		0.01702	-1.24801e-12	-7.18855e-10	-1.07329e-10
		0.01704	-1.36033e-10	-2.68635e-10		0.01704	-6.24006e-13	-7.18231e-10	-1.09201e-10
		0.01706	-1.34785e-10	-2.68947e-10		0.01706	-3.12003e-13	-7.18231e-10	-1.09201e-10
		0.01708	-1.36033e-10	-2.70195e-10		0.01708	-6.24006e-13	-7.18855e-10	-1.09825e-10
		0.0171	-1.36657e-10	-2.70195e-10		0.0171	-1.24801e-12	-7.19479e-10	-1.09201e-10
		0.01712	-1.37281e-10	-2.71131e-10		0.01712	-1.24801e-12	-7.18855e-10	-1.09825e-10
		0.01714	-1.38217e-10	-2.72379e-10		0.01714	-1.24801e-12	-7.19479e-10	-1.09201e-10
		0.01716	-1.37905e-10	-2.74563e-10		0.01716	-1.56001e-12	-7.16983e-10	-1.09825e-10
		0.01718	-1.37905e-10	-2.74251e-10		0.01718	-2.18402e-12	-7.16983e-10	-1.09825e-10
		0.0172	-1.37281e-10	-2.75187e-10		0.0172	-2.80803e-12	-7.18855e-10	-1.08577e-10
		0.01722	-1.36969e-10	-2.74251e-10		0.01722	-3.43203e-12	-7.20103e-10	-1.12321e-10
		0.01724	-1.37593e-10	-2.73315e-10		0.01724	-3.74404e-12	-7.20727e-10	-1.14193e-10
		0.01726	-1.36657e-10	-2.73315e-10		0.01726	-4.05604e-12	-7.21975e-10	-1.14193e-10
		0.01728	-1.35409e-10	-2.72379e-10		0.01728	-4.36804e-12	-7.22599e-10	-1.15441e-10
		0.0173	-1.33849e-10	-2.72067e-10		0.0173	-5.61605e-12	-7.21975e-10	-1.12945e-10
		0.01732	-1.33225e-10	-2.72067e-10		0.01732	-5.61605e-12	-7.20103e-10	-1.12945e-10
		0.01734	-1.32913e-10	-2.70819e-10		0.01734	-6.86406e-12	-7.18855e-10	-1.11697e-10
		0.01736	-1.34473e-10	-2.70507e-10		0.01736	-7.48807e-12	-7.18855e-10	-1.11697e-10
		0.01738	-1.36033e-10	-2.71755e-10		0.01738	-7.80007e-12	-7.18855e-10	-1.11073e-10
		0.0174	-1.37281e-10	-2.72067e-10		0.0174	-7.80007e-12	-7.23223e-10	-1.10449e-10
		0.01742	-1.38217e-10	-2.73939e-10		0.01742	-8.73608e-12	-7.23223e-10	-1.10449e-10
		0.01744	-1.38217e-10	-2.76435e-10		0.01744	-8.11208e-12	-7.25095e-10	-1.11073e-10
		0.01746	-1.38217e-10	-2.77059e-10		0.01746	-8.11208e-12	-7.23847e-10	-1.08577e-10
		0.01748	-1.36345e-10	-2.77683e-10		0.01748	-6.55206e-12	-7.23847e-10	-1.09825e-10
		0.0175	-1.34473e-10	-2.77683e-10		0.0175	-5.30405e-12	-7.21975e-10	-1.10449e-10
		0.01752	-1.33225e-10	-2.76123e-10		0.01752	-4.68004e-12	-7.20103e-10	-1.12321e-10
		0.01754	-1.32913e-10	-2.73939e-10		0.01754	-4.99205e-12	-7.22599e-10	-1.12945e-10
		0.01756	-1.33225e-10	-2.72067e-10		0.01756	-3.43203e-12	-7.22599e-10	-1.14193e-10
		0.01758	-1.32913e-10	-2.69883e-10		0.01758	-4.68004e-12	-7.23223e-10	-1.14193e-10
		0.0176	-1.33537e-10	-2.67699e-10		0.0176	-4.99205e-12	-7.23223e-10	-1.13569e-10
		0.01762	-1.33537e-10	-2.68011e-10		0.01762	-5.30405e-12	-7.21975e-10	-1.09825e-10
		0.01764	-1.33225e-10	-2.6645e-10		0.01764	-5.61605e-12	-7.21351e-10	-1.09201e-10
		0.01766	-1.32289e-10	-2.6645e-10		0.01766	-5.30405e-12	-7.20103e-10	-1.09201e-10
		0.01768	-1.32289e-10	-2.65514e-10		0.01768	-4.68004e-12	-7.22599e-10	-1.09825e-10
		0.0177	-1.31977e-10	-2.65514e-10		0.0177	-4.36804e-12	-7.23847e-10	-1.10449e-10
		0.01772	-1.32289e-10	-2.65202e-10		0.01772	-3.43203e-12	-7.25719e-10	-1.11073e-10
		0.01774	-1.32601e-10	-2.64578e-10		0.01774	-2.49602e-12	-7.25719e-10	-1.11073e-10
		0.01776	-1.32601e-10	-2.6489e-10		0.01776	-2.49602e-12	-7.23847e-10	-1.11697e-10
		0.01778	-1.32913e-10	-2.6645e-10		0.01778	-1.87202e-12	-7.21975e-10	-1.09825e-10
		0.0178	-1.33537e-10	-2.67075e-10		0.0178	-2.49602e-12	-7.20727e-10	-1.06705e-10
		0.01782	-1.33849e-10	-2.69259e-10		0.01782	-4.36804e-12	-7.19479e-10	-1.07329e-10
		0.01784	-1.32913e-10	-2.69259e-10		0.01784	-4.68004e-12	-7.19479e-10	-1.10449e-10
		0.01786	-1.33849e-10	-2.69883e-10		0.01786	-4.99205e-12	-7.18855e-10	-1.11697e-10
		0.01788	-1.33849e-10	-2.69571e-10		0.01788	-5.30405e-12	-7.20727e-10	-1.11073e-10
		0.0179	-1.33537e-10	-2.70195e-10		0.0179	-4.68004e-12	-7.21351e-10	-1.12321e-10
		0.01792	-1.33537e-10	-2.68635e-10		0.01792	-2.80803e-12	-7.20727e-10	-1.11697e-10
		0.01794	-1.33537e-10	-2.69571e-10		0.01794	-6.24006e-13	-7.21351e-10	-1.11697e-10
		0.01796	-1.33225e-10	-2.72067e-10		0.01796	0	-7.20727e-10	-1.09825e-10
		0.01798	-1.32913e-10	-2.73315e-10		0.01798	0	-7.20727e-10	-1.10449e-10
		0.018	-1.32289e-10	-2.74251e-10		0.018	-1.56001e-12	-7.19479e-10	-1.07953e-10
		0.01802	-1.32289e-10	-2.72691e-10		0.01802	-4.05604e-12	-7.20103e-10	-1.07953e-10
		0.01804	-1.32601e-10	-2.70819e-10		0.01804	-4.99205e-12	-7.21351e-10	-1.11073e-10
		0.01806	-1.34161e-10	-2.69259e-10		0.01806	-7.17607e-12	-7.20103e-10	-1.11073e-10
		0.01808	-1.35409e-10	-2.68635e-10		0.01808	-7.48807e-12	-7.20727e-10	-1.12945e-10
		0.0181	-1.37281e-10	-2.68635e-10		0.0181	-7.80007e-12	-7.20103e-10	-1.11697e-10
		0.01812	-1.37281e-10	-2.69259e-10		0.01812	-8.11208e-12	-7.20103e-10	-1.11073e-10
		0.01814	-1.37905e-10	-2.70195e-10		0.01814	-8.73608e-12	-7.19479e-10	-1.11073e-10
		0.01816	-1.37905e-10	-2.69259e-10		0.01816	-8.73608e-12	-7.18855e-10	-1.09201e-10
		0.01818	-1.37281e-10	-2.68635e-10		0.01818	-9.04808e-12	-7.19479e-10	-1.08577e-10
		0.0182	-1.38217e-10	-2.67387e-10		0.0182	-6.86406e-12	-7.22599e-10	-1.09201e-10
		0.01822	-1.37905e-10	-2.6489e-10		0.01822	-5.61605e-12	-7.21351e-10	-1.09825e-10
		0.01824	-1.38217e-10	-2.63018e-10		0.01824	-3.43203e-12	-7.20103e-10	-1.09201e-10
		0.01826	-1.38841e-10	-2.61458e-10		0.01826	-2.18402e-12	-7.20103e-10	-1.08577e-10
		0.01828	-1.38841e-10	-2.61458e-10		0.01828	-2.18402e-12	-7.18855e-10	-1.08577e-10
		0.0183	-1.37905e-10	-2.63018e-10		0.0183	-1.87202e-12	-7.18855e-10	-1.09201e-10
		0.01832	-1.36969e-10	-2.63642e-10		0.01832	-3.12003e-12	-7.16983e-10	-1.07329e-10
		0.01834	-1.36969e-10	-2.65514e-10		0.01834	-4.68004e-12	-7.15111e-10	-1.09825e-10
		0.01836	-1.35409e-10	-2.66763e-10		0.01836	-5.30405e-12	-7.17607e-10	-1.09201e-10
		0.01838	-1.35097e-10	-2.67699e-10		0.01838	-4.36804e-12	-7.15735e-10	-1.10449e-10
		0.0184	-1.34473e-10	-2.67699e-10		0.0184	-4.99205e-12	-7.18231e-10	-1.11697e-10
		0.01842	-1.33225e-10	-2.68011e-10		0.01842	-5.92806e-12	-7.19479e-10	-1.10449e-10
		0.01844	-1.31353e-10	-2.68323e-10		0.01844	-6.24006e-12	-7.21351e-10	-1.09825e-10
		0.01846	-1.30417e-10	-2.67699e-10		0.01846	-5.61605e-12	-7.23223e-10	-1.09201e-10
		0.01848	-1.29481e-10	-2.6645e-10		0.01848	-3.43203e-12	-7.23847e-10	-1.07329e-10
		0.0185	-1.29169e-10	-2.6489e-10		0.0185	-3.12003e-12	-7.24471e-10	-1.06705e-10
		0.01852	-1.29169e-10	-2.63642e-10		0.01852	-1.87202e-12	-7.21351e-10	-1.07329e-10
		0.01854	-1.29793e-10	-2.63018e-10		0.01854	-1.56001e-12	-7.21351e-10	-1.09825e-10
		0.01856	-1.31041e-10	-2.63018e-10		0.01856	-1.24801e-12	-7.20727e-10	-1.12321e-10
		0.01858	-1.30729e-10	-2.63954e-10		0.01858	-9.36009e-13	-7.20727e-10	-1.12321e-10
		0.0186	-1.29793e-10	-2.6489e-10		0.0186	-9.36009e-13	-7.20727e-10	-1.13569e-10
		0.01862	-1.29793e-10	-2.6645e-10		0.01862	-9.36009e-13	-7.20727e-10	-1.14817e-10
		0.01864	-1.28857e-10	-2.67699e-10		0.01864	-9.36009e-13	-7.21975e-10	-1.12945e-10
		0.01866	-1.28857e-10	-2.69571e-10		0.01866	-2.49602e-12	-7.21351e-10	-1.13569e-10
		0.01868	-1.28857e-10	-2.68947e-10		0.01868	-3.12003e-12	-7.21351e-10	-1.14193e-10
		0.0187	-1.30417e-10	-2.68011e-10		0.0187	-3.74404e-12	-7.19479e-10	-1.13569e-10
		0.01872	-1.31977e-10	-2.66763e-10		0.01872	-3.43203e-12	-7.18231e-10	-1.15441e-10
		0.01874	-1.33537e-10	-2.6489e-10		0.01874	-3.12003e-12	-7.17607e-10	-1.13569e-10
		0.01876	-1.35409e-10	-2.64266e-10		0.01876	-1.87202e-12	-7.16983e-10	-1.12321e-10
		0.01878	-1.36345e-10	-2.6489e-10		0.01878	-1.87202e-12	-7.13863e-10	-1.11073e-10
		0.0188	-1.36969e-10	-2.65202e-10		0.0188	-2.18402e-12	-7.14487e-10	-1.09201e-10
		0.01882	-1.37593e-10	-2.65514e-10		0.01882	-3.12003e-12	-7.15111e-10	-1.07953e-10
		0.01884	-1.37593e-10	-2.6489e-10		0.01884	-3.74404e-12	-7.16359e-10	-1.07953e-10
		0.01886	-1.36969e-10	-2.64266e-10		0.01886	-3.43203e-12	-7.18855e-10	-1.10449e-10
		0.01888	-1.36657e-10	-2.6333e-10		0.01888	-3.43203e-12	-7.21351e-10	-1.09825e-10
		0.0189	-1.36033e-10	-2.6333e-10		0.0189	-3.12003e-12	-7.23847e-10	-1.12945e-10
		0.01892	-1.35409e-10	-2.63018e-10		0.01892	-2.18402e-12	-7.23847e-10	-1.11697e-10
		0.01894	-1.33849e-10	-2.63642e-10		0.01894	-9.36009e-13	-7.24471e-10	-1.11697e-10
		0.01896	-1.33537e-10	-2.63954e-10		0.01896	0	-7.21351e-10	-1.11073e-10
		0.01898	-1.33537e-10	-2.65826e-10		0.01898	-6.24006e-13	-7.20727e-10	-1.09825e-10
		0.019	-1.33537e-10	-2.67075e-10		0.019	-2.80803e-12	-7.18231e-10	-1.11073e-10
		0.01902	-1.34473e-10	-2.67699e-10		0.01902	-4.36804e-12	-7.18855e-10	-1.12321e-10
		0.01904	-1.34785e-10	-2.68635e-10		0.01904	-5.92806e-12	-7.21351e-10	-1.12945e-10
		0.01906	-1.35409e-10	-2.68323e-10		0.01906	-5.92806e-12	-7.23223e-10	-1.14817e-10
		0.01908	-1.36345e-10	-2.68635e-10		0.01908	-5.61605e-12	-7.25719e-10	-1.14817e-10
		0.0191	-1.36969e-10	-2.68635e-10		0.0191	-4.99205e-12	-7.25719e-10	-1.15441e-10
		0.01912	-1.37593e-10	-2.68635e-10		0.01912	-4.36804e-12	-7.25719e-10	-1.14193e-10
		0.01914	-1.37593e-10	-2.67699e-10		0.01914	-4.05604e-12	-7.23223e-10	-1.12321e-10
		0.01916	-1.37905e-10	-2.67699e-10		0.01916	-4.68004e-12	-7.22599e-10	-1.12321e-10
		0.01918	-1.37905e-10	-2.67075e-10		0.01918	-4.68004e-12	-7.21351e-10	-1.11697e-10
		0.0192	-1.37905e-10	-2.67075e-10		0.0192	-4.36804e-12	-7.21351e-10	-1.11073e-10
		0.01922	-1.38529e-10	-2.68011e-10		0.01922	-2.18402e-12	-7.20103e-10	-1.12321e-10
		0.01924	-1.40089e-10	-2.68011e-10		0.01924	-1.56001e-12	-7.21351e-10	-1.13569e-10
		0.01926	-1.39777e-10	-2.68323e-10		0.01926	-6.24006e-13	-7.23223e-10	-1.12321e-10
		0.01928	-1.39465e-10	-2.68635e-10		0.01928	-3.12003e-13	-7.21975e-10	-1.13569e-10
		0.0193	-1.39465e-10	-2.68011e-10		0.0193	-6.24006e-13	-7.21351e-10	-1.12945e-10
		0.01932	-1.38841e-10	-2.68947e-10		0.01932	-2.80803e-12	-7.20103e-10	-1.11697e-10
		0.01934	-1.38529e-10	-2.68635e-10		0.01934	-3.12003e-12	-7.18855e-10	-1.12321e-10
		0.01936	-1.37593e-10	-2.68323e-10		0.01936	-4.68004e-12	-7.19479e-10	-1.12321e-10
		0.01938	-1.37593e-10	-2.68947e-10		0.01938	-4.99205e-12	-7.21351e-10	-1.14817e-10
		0.0194	-1.37905e-10	-2.69259e-10		0.0194	-6.24006e-12	-7.21975e-10	-1.14817e-10
		0.01942	-1.38841e-10	-2.69259e-10		0.01942	-6.86406e-12	-7.23847e-10	-1.16689e-10
		0.01944	-1.38841e-10	-2.69571e-10		0.01944	-7.17607e-12	-7.22599e-10	-1.16065e-10
		0.01946	-1.37905e-10	-2.69883e-10		0.01946	-5.92806e-12	-7.20727e-10	-1.16065e-10
		0.01948	-1.37281e-10	-2.70195e-10		0.01948	-4.36804e-12	-7.21351e-10	-1.12321e-10
		0.0195	-1.36969e-10	-2.71131e-10		0.0195	-3.74404e-12	-7.18855e-10	-1.11697e-10
		0.01952	-1.36969e-10	-2.70195e-10		0.01952	-2.80803e-12	-7.18231e-10	-1.09201e-10
		0.01954	-1.37593e-10	-2.70195e-10		0.01954	-3.74404e-12	-7.17607e-10	-1.09825e-10
		0.01956	-1.37593e-10	-2.70819e-10		0.01956	-3.74404e-12	-7.18231e-10	-1.09201e-10
		0.01958	-1.38841e-10	-2.71755e-10		0.01958	-4.99205e-12	-7.19479e-10	-1.10449e-10
		0.0196	-1.39465e-10	-2.73003e-10		0.0196	-4.68004e-12	-7.19479e-10	-1.12321e-10
		0.01962	-1.40401e-10	-2.73939e-10		0.01962	-4.05604e-12	-7.18855e-10	-1.11697e-10
		0.01964	-1.41025e-10	-2.74251e-10		0.01964	-3.12003e-12	-7.19479e-10	-1.10449e-10
		0.01966	-1.41961e-10	-2.74875e-10		0.01966	-1.56001e-12	-7.19479e-10	-1.13569e-10
		0.01968	-1.41025e-10	-2.73939e-10		0.01968	0	-7.20103e-10	-1.12321e-10
		0.0197	-1.42273e-10	-2.72691e-10		0.0197	6.24006e-13	-7.18855e-10	-1.12945e-10
		0.01972	-1.42273e-10	-2.71755e-10		0.01972	3.12003e-13	-7.18231e-10	-1.12945e-10
		0.01974	-1.42897e-10	-2.71755e-10		0.01974	6.24006e-13	-7.18855e-10	-1.12321e-10
		0.01976	-1.43833e-10	-2.72379e-10		0.01976	-6.24006e-13	-7.18231e-10	-1.14817e-10
		0.01978	-1.42897e-10	-2.73003e-10		0.01978	-9.36009e-13	-7.19479e-10	-1.14193e-10
		0.0198	-1.42897e-10	-2.72691e-10		0.0198	-2.18402e-12	-7.17607e-10	-1.14193e-10
		0.01982	-1.42585e-10	-2.72691e-10		0.01982	-2.80803e-12	-7.18231e-10	-1.14817e-10
		0.01984	-1.41025e-10	-2.73003e-10		0.01984	-3.43203e-12	-7.17607e-10	-1.13569e-10
		0.01986	-1.41649e-10	-2.72691e-10		0.01986	-3.74404e-12	-7.17607e-10	-1.13569e-10
		0.01988	-1.40089e-10	-2.72691e-10		0.01988	-3.74404e-12	-7.18231e-10	-1.12321e-10
		0.0199	-1.40089e-10	-2.73315e-10		0.0199	-2.80803e-12	-7.18855e-10	-1.11697e-10
		0.01992	-1.38217e-10	-2.75187e-10		0.01992	-2.80803e-12	-7.20727e-10	-1.11697e-10
		0.01994	-1.37281e-10	-2.76435e-10		0.01994	-3.43203e-12	-7.21975e-10	-1.11697e-10
		0.01996	-1.36969e-10	-2.77683e-10		0.01996	-3.74404e-12	-7.22599e-10	-1.10449e-10
		0.01998	-1.36345e-10	-2.77683e-10		0.01998	-3.74404e-12	-7.23847e-10	-1.09825e-10
		0.02	-1.36969e-10	-2.78307e-10		0.02	-4.36804e-12	-7.22599e-10	-1.11073e-10
		0.02002	-1.37281e-10	-2.76747e-10		0.02002	-4.36804e-12	-7.23223e-10	-1.12321e-10
		0.02004	-1.37905e-10	-2.74875e-10		0.02004	-3.74404e-12	-7.23223e-10	-1.11697e-10
		0.02006	-1.37905e-10	-2.73939e-10		0.02006	-3.43203e-12	-7.21975e-10	-1.11697e-10
		0.02008	-1.37281e-10	-2.73003e-10		0.02008	-2.49602e-12	-7.20727e-10	-1.12945e-10
		0.0201	-1.38529e-10	-2.72691e-10		0.0201	-2.80803e-12	-7.21351e-10	-1.13569e-10
		0.02012	-1.37905e-10	-2.73939e-10		0.02012	-2.49602e-12	-7.21351e-10	-1.12321e-10
		0.02014	-1.37281e-10	-2.75499e-10		0.02014	-3.43203e-12	-7.20103e-10	-1.14817e-10
		0.02016	-1.36969e-10	-2.77371e-10		0.02016	-4.68004e-12	-7.20103e-10	-1.14193e-10
		0.02018	-1.35721e-10	-2.76747e-10		0.02018	-4.99205e-12	-7.19479e-10	-1.15441e-10
		0.0202	-1.34785e-10	-2.76435e-10		0.0202	-4.68004e-12	-7.20103e-10	-1.16065e-10
		0.02022	-1.33537e-10	-2.75187e-10		0.02022	-4.36804e-12	-7.18855e-10	-1.15441e-10
		0.02024	-1.33537e-10	-2.73315e-10		0.02024	-4.36804e-12	-7.18855e-10	-1.15441e-10
		0.02026	-1.32913e-10	-2.72067e-10		0.02026	-3.43203e-12	-7.20103e-10	-1.14817e-10
		0.02028	-1.33537e-10	-2.72067e-10		0.02028	-3.43203e-12	-7.21351e-10	-1.13569e-10
		0.0203	-1.33849e-10	-2.73003e-10		0.0203	-2.49602e-12	-7.20727e-10	-1.13569e-10
		0.02032	-1.33537e-10	-2.73627e-10		0.02032	-1.24801e-12	-7.20727e-10	-1.12321e-10
		0.02034	-1.34473e-10	-2.73627e-10		0.02034	3.12003e-13	-7.20727e-10	-1.11697e-10
		0.02036	-1.34473e-10	-2.73315e-10		0.02036	6.24006e-13	-7.21975e-10	-1.13569e-10
		0.02038	-1.34785e-10	-2.71755e-10		0.02038	6.24006e-13	-7.22599e-10	-1.14193e-10
		0.0204	-1.34785e-10	-2.71443e-10		0.0204	9.36009e-13	-7.23223e-10	-1.15441e-10
		0.02042	-1.33849e-10	-2.71131e-10		0.02042	-3.12003e-13	-7.24471e-10	-1.14817e-10
		0.02044	-1.32913e-10	-2.70507e-10		0.02044	-1.87202e-12	-7.24471e-10	-1.16065e-10
		0.02046	-1.31041e-10	-2.71131e-10		0.02046	-3.12003e-12	-7.22599e-10	-1.16065e-10
		0.02048	-1.31665e-10	-2.69883e-10		0.02048	-3.43203e-12	-7.21351e-10	-1.15441e-10
		0.0205	-1.30729e-10	-2.69883e-10		0.0205	-3.43203e-12	-7.20103e-10	-1.16065e-10
		0.02052	-1.31041e-10	-2.68947e-10		0.02052	-3.43203e-12	-7.20103e-10	-1.14817e-10
		0.02054	-1.30729e-10	-2.67699e-10		0.02054	-3.43203e-12	-7.19479e-10	-1.14193e-10
		0.02056	-1.30729e-10	-2.67699e-10		0.02056	-2.80803e-12	-7.18855e-10	-1.13569e-10
		0.02058	-1.30417e-10	-2.68011e-10		0.02058	-2.80803e-12	-7.20103e-10	-1.13569e-10
		0.0206	-1.30105e-10	-2.68011e-10		0.0206	-2.49602e-12	-7.20727e-10	-1.13569e-10
		0.02062	-1.28857e-10	-2.68635e-10		0.02062	-2.80803e-12	-7.22599e-10	-1.13569e-10
		0.02064	-1.28545e-10	-2.69571e-10		0.02064	-2.49602e-12	-7.23223e-10	-1.11697e-10
		0.02066	-1.29169e-10	-2.69883e-10		0.02066	-2.80803e-12	-7.21351e-10	-1.11073e-10
		0.02068	-1.32289e-10	-2.71443e-10		0.02068	-2.49602e-12	-7.18231e-10	-1.11073e-10
		0.0207	-1.33537e-10	-2.72067e-10		0.0207	-2.49602e-12	-7.18855e-10	-1.15441e-10
		0.02072	-1.34785e-10	-2.71755e-10		0.02072	-3.12003e-12	-7.17607e-10	-1.16689e-10
		0.02074	-1.35721e-10	-2.72691e-10		0.02074	-2.80803e-12	-7.18855e-10	-1.16689e-10
		0.02076	-1.35097e-10	-2.72691e-10		0.02076	-3.74404e-12	-7.17607e-10	-1.19185e-10
		0.02078	-1.35097e-10	-2.72379e-10		0.02078	-2.49602e-12	-7.18855e-10	-1.19185e-10
		0.0208	-1.34785e-10	-2.72379e-10		0.0208	-2.49602e-12	-7.18231e-10	-1.18561e-10
		0.02082	-1.33225e-10	-2.73315e-10		0.02082	-2.80803e-12	-7.16983e-10	-1.19185e-10
		0.02084	-1.31977e-10	-2.74875e-10		0.02084	-1.87202e-12	-7.16983e-10	-1.17937e-10
		0.02086	-1.31353e-10	-2.75187e-10		0.02086	-2.80803e-12	-7.19479e-10	-1.17313e-10
		0.02088	-1.31041e-10	-2.75187e-10		0.02088	-2.49602e-12	-7.20103e-10	-1.16689e-10
		0.0209	-1.30729e-10	-2.75187e-10		0.0209	-3.74404e-12	-7.22599e-10	-1.16689e-10
		0.02092	-1.31353e-10	-2.73939e-10		0.02092	-4.99205e-12	-7.22599e-10	-1.17313e-10
		0.02094	-1.31665e-10	-2.73315e-10		0.02094	-5.30405e-12	-7.23847e-10	-1.15441e-10
		0.02096	-1.32289e-10	-2.72691e-10		0.02096	-5.61605e-12	-7.22599e-10	-1.15441e-10
		0.02098	-1.31977e-10	-2.72691e-10		0.02098	-5.61605e-12	-7.21975e-10	-1.16065e-10
		0.021	-1.32289e-10	-2.72379e-10		0.021	-6.24006e-12	-7.21351e-10	-1.13569e-10
		0.02102	-1.31977e-10	-2.72691e-10		0.02102	-6.86406e-12	-7.19479e-10	-1.14193e-10
		0.02104	-1.32601e-10	-2.72691e-10		0.02104	-6.24006e-12	-7.20727e-10	-1.14817e-10
		0.02106	-1.33225e-10	-2.73627e-10		0.02106	-5.61605e-12	-7.20727e-10	-1.15441e-10
		0.02108	-1.34473e-10	-2.73627e-10		0.02108	-4.68004e-12	-7.22599e-10	-1.14193e-10
		0.0211	-1.33537e-10	-2.74563e-10		0.0211	-3.12003e-12	-7.21351e-10	-1.11697e-10
		0.02112	-1.34161e-10	-2.75811e-10		0.02112	-2.18402e-12	-7.23223e-10	-1.11697e-10
		0.02114	-1.33537e-10	-2.75499e-10		0.02114	-1.56001e-12	-7.21975e-10	-1.11697e-10
		0.02116	-1.33225e-10	-2.77059e-10		0.02116	-1.87202e-12	-7.21351e-10	-1.11697e-10
		0.02118	-1.33849e-10	-2.77059e-10		0.02118	-2.49602e-12	-7.21351e-10	-1.11073e-10
		0.0212	-1.34161e-10	-2.77371e-10		0.0212	-1.87202e-12	-7.21975e-10	-1.13569e-10
		0.02122	-1.34473e-10	-2.78307e-10		0.02122	-1.87202e-12	-7.22599e-10	-1.13569e-10
		0.02124	-1.34785e-10	-2.78619e-10		0.02124	-2.18402e-12	-7.23223e-10	-1.12945e-10
		0.02126	-1.35097e-10	-2.78307e-10		0.02126	-1.87202e-12	-7.23223e-10	-1.12321e-10
		0.02128	-1.34161e-10	-2.77371e-10		0.02128	-2.18402e-12	-7.22599e-10	-1.12945e-10
		0.0213	-1.33849e-10	-2.77371e-10		0.0213	-2.49602e-12	-7.20727e-10	-1.12945e-10
		0.02132	-1.32601e-10	-2.77371e-10		0.02132	-2.80803e-12	-7.19479e-10	-1.12321e-10
		0.02134	-1.32601e-10	-2.77371e-10		0.02134	-2.49602e-12	-7.19479e-10	-1.12321e-10
		0.02136	-1.32289e-10	-2.77059e-10		0.02136	-1.24801e-12	-7.20103e-10	-1.14193e-10
		0.02138	-1.32289e-10	-2.77371e-10		0.02138	-1.56001e-12	-7.20727e-10	-1.13569e-10
		0.0214	-1.32601e-10	-2.77059e-10		0.0214	-9.36009e-13	-7.21351e-10	-1.12321e-10
		0.02142	-1.31665e-10	-2.77995e-10		0.02142	-1.24801e-12	-7.20103e-10	-1.13569e-10
		0.02144	-1.30729e-10	-2.77683e-10		0.02144	-1.24801e-12	-7.21351e-10	-1.12321e-10
		0.02146	-1.30105e-10	-2.78619e-10		0.02146	-1.24801e-12	-7.20727e-10	-1.10449e-10
		0.02148	-1.30105e-10	-2.78931e-10		0.02148	-2.49602e-12	-7.21351e-10	-1.09825e-10
		0.0215	-1.30105e-10	-2.79555e-10		0.0215	-4.36804e-12	-7.19479e-10	-1.12321e-10
		0.02152	-1.30105e-10	-2.78931e-10		0.02152	-4.36804e-12	-7.18231e-10	-1.11073e-10
		0.02154	-1.30417e-10	-2.78931e-10		0.02154	-5.92806e-12	-7.19479e-10	-1.11697e-10
		0.02156	-1.31353e-10	-2.77683e-10		0.02156	-5.30405e-12	-7.19479e-10	-1.11073e-10
		0.02158	-1.31041e-10	-2.77371e-10		0.02158	-4.68004e-12	-7.19479e-10	-1.11697e-10
		0.0216	-1.32289e-10	-2.75811e-10		0.0216	-4.36804e-12	-7.18855e-10	-1.11697e-10
		0.02162	-1.32601e-10	-2.76123e-10		0.02162	-3.43203e-12	-7.18855e-10	-1.11073e-10
		0.02164	-1.31977e-10	-2.76435e-10		0.02164	-3.43203e-12	-7.20103e-10	-1.13569e-10
		0.02166	-1.30729e-10	-2.77683e-10		0.02166	-2.80803e-12	-7.19479e-10	-1.11697e-10
		0.02168	-1.29169e-10	-2.78931e-10		0.02168	-3.12003e-12	-7.21351e-10	-1.12321e-10
		0.0217	-1.26673e-10	-2.78619e-10		0.0217	-2.80803e-12	-7.21975e-10	-1.13569e-10
		0.02172	-1.25425e-10	-2.79243e-10		0.02172	-3.12003e-12	-7.23223e-10	-1.15441e-10
		0.02174	-1.24801e-10	-2.79867e-10		0.02174	-3.12003e-12	-7.20727e-10	-1.17313e-10
		0.02176	-1.25425e-10	-2.82051e-10		0.02176	-3.43203e-12	-7.21975e-10	-1.17313e-10
		0.02178	-1.26673e-10	-2.82987e-10		0.02178	-4.99205e-12	-7.18855e-10	-1.17313e-10
		0.0218	-1.26985e-10	-2.83923e-10		0.0218	-7.17607e-12	-7.17607e-10	-1.16065e-10
		0.02182	-1.28545e-10	-2.83611e-10		0.02182	-8.73608e-12	-7.15735e-10	-1.13569e-10
		0.02184	-1.30105e-10	-2.82675e-10		0.02184	-8.11208e-12	-7.16359e-10	-1.14817e-10
		0.02186	-1.31353e-10	-2.81427e-10		0.02186	-8.73608e-12	-7.15735e-10	-1.15441e-10
		0.02188	-1.32913e-10	-2.79555e-10		0.02188	-7.17607e-12	-7.15735e-10	-1.14817e-10
		0.0219	-1.32289e-10	-2.77059e-10		0.0219	-5.30405e-12	-7.16359e-10	-1.16689e-10
		0.02192	-1.32913e-10	-2.76435e-10		0.02192	-4.36804e-12	-7.16983e-10	-1.14817e-10
		0.02194	-1.31665e-10	-2.76435e-10		0.02194	-3.43203e-12	-7.18231e-10	-1.14193e-10
		0.02196	-1.30105e-10	-2.76747e-10		0.02196	-2.18402e-12	-7.16983e-10	-1.13569e-10
		0.02198	-1.29793e-10	-2.77683e-10		0.02198	-1.24801e-12	-7.16359e-10	-1.12945e-10
		0.022	-1.30105e-10	-2.79243e-10		0.022	-1.87202e-12	-7.16983e-10	-1.13569e-10
		0.02202	-1.28233e-10	-2.80179e-10		0.02202	-2.18402e-12	-7.16359e-10	-1.14193e-10
		0.02204	-1.29793e-10	-2.82051e-10		0.02204	-2.18402e-12	-7.16983e-10	-1.13569e-10
		0.02206	-1.29169e-10	-2.82363e-10		0.02206	-2.18402e-12	-7.17607e-10	-1.14817e-10
		0.02208	-1.29481e-10	-2.83611e-10		0.02208	-3.12003e-12	-7.17607e-10	-1.14817e-10
		0.0221	-1.28857e-10	-2.84547e-10		0.0221	-3.12003e-12	-7.17607e-10	-1.15441e-10
		0.02212	-1.28545e-10	-2.85483e-10		0.02212	-3.43203e-12	-7.17607e-10	-1.14193e-10
		0.02214	-1.29169e-10	-2.85171e-10		0.02214	-3.43203e-12	-7.17607e-10	-1.13569e-10
		0.02216	-1.29793e-10	-2.84547e-10		0.02216	-4.36804e-12	-7.16983e-10	-1.14817e-10
		0.02218	-1.31353e-10	-2.83611e-10		0.02218	-4.99205e-12	-7.15111e-10	-1.16065e-10
		0.0222	-1.32913e-10	-2.82051e-10		0.0222	-4.68004e-12	-7.15111e-10	-1.16065e-10
		0.02222	-1.34473e-10	-2.79243e-10		0.02222	-4.05604e-12	-7.15111e-10	-1.16689e-10
		0.02224	-1.35409e-10	-2.77371e-10		0.02224	-2.49602e-12	-7.16359e-10	-1.16689e-10
		0.02226	-1.36969e-10	-2.75811e-10		0.02226	-1.87202e-12	-7.17607e-10	-1.14817e-10
		0.02228	-1.37593e-10	-2.75187e-10		0.02228	-2.49602e-12	-7.18231e-10	-1.14817e-10
		0.0223	-1.36033e-10	-2.75187e-10		0.0223	-2.80803e-12	-7.19479e-10	-1.12945e-10
		0.02232	-1.35721e-10	-2.77371e-10		0.02232	-3.12003e-12	-7.17607e-10	-1.12321e-10
		0.02234	-1.35097e-10	-2.77683e-10		0.02234	-1.56001e-12	-7.16983e-10	-1.12321e-10
		0.02236	-1.34473e-10	-2.79243e-10		0.02236	-3.12003e-13	-7.17607e-10	-1.12321e-10
		0.02238	-1.33537e-10	-2.79867e-10		0.02238	0	-7.18855e-10	-1.12321e-10
		0.0224	-1.33537e-10	-2.82051e-10		0.0224	-3.12003e-13	-7.17607e-10	-1.12945e-10
		0.02242	-1.33849e-10	-2.82675e-10		0.02242	-9.36009e-13	-7.19479e-10	-1.13569e-10
		0.02244	-1.33225e-10	-2.82363e-10		0.02244	-6.24006e-13	-7.19479e-10	-1.12945e-10
		0.02246	-1.33537e-10	-2.81739e-10		0.02246	-1.56001e-12	-7.20727e-10	-1.13569e-10
		0.02248	-1.32913e-10	-2.82051e-10		0.02248	-1.24801e-12	-7.19479e-10	-1.13569e-10
		0.0225	-1.32601e-10	-2.81115e-10		0.0225	-9.36009e-13	-7.19479e-10	-1.12945e-10
		0.02252	-1.31041e-10	-2.80803e-10		0.02252	-2.49602e-12	-7.19479e-10	-1.15441e-10
		0.02254	-1.30105e-10	-2.80179e-10		0.02254	-3.74404e-12	-7.17607e-10	-1.16065e-10
		0.02256	-1.28545e-10	-2.79867e-10		0.02256	-4.05604e-12	-7.16359e-10	-1.16065e-10
		0.02258	-1.26049e-10	-2.78931e-10		0.02258	-4.36804e-12	-7.16983e-10	-1.14817e-10
		0.0226	-1.25113e-10	-2.79243e-10		0.0226	-3.74404e-12	-7.16983e-10	-1.13569e-10
		0.02262	-1.23553e-10	-2.78931e-10		0.02262	-3.74404e-12	-7.15111e-10	-1.11073e-10
		0.02264	-1.23865e-10	-2.77059e-10		0.02264	-4.05604e-12	-7.14487e-10	-1.11073e-10
		0.02266	-1.24177e-10	-2.75499e-10		0.02266	-4.05604e-12	-7.14487e-10	-1.11697e-10
		0.02268	-1.25737e-10	-2.74251e-10		0.02268	-4.68004e-12	-7.15735e-10	-1.09201e-10
		0.0227	-1.26985e-10	-2.73627e-10		0.0227	-4.99205e-12	-7.15735e-10	-1.09825e-10
		0.02272	-1.27609e-10	-2.74251e-10		0.02272	-4.68004e-12	-7.16983e-10	-1.09201e-10
		0.02274	-1.27609e-10	-2.75187e-10		0.02274	-4.68004e-12	-7.19479e-10	-1.09825e-10
		0.02276	-1.27921e-10	-2.77059e-10		0.02276	-2.80803e-12	-7.20727e-10	-1.12321e-10
		0.02278	-1.26673e-10	-2.78619e-10		0.02278	-2.80803e-12	-7.21975e-10	-1.14817e-10
		0.0228	-1.24801e-10	-2.80491e-10		0.0228	-3.43203e-12	-7.21351e-10	-1.17313e-10
		0.02282	-1.25113e-10	-2.81739e-10		0.02282	-3.43203e-12	-7.18855e-10	-1.17937e-10
		0.02284	-1.26049e-10	-2.83923e-10		0.02284	-4.05604e-12	-7.18231e-10	-1.20433e-10
		0.02286	-1.26673e-10	-2.85171e-10		0.02286	-4.68004e-12	-7.15111e-10	-1.21057e-10
		0.02288	-1.27609e-10	-2.85171e-10		0.02288	-4.99205e-12	-7.15111e-10	-1.19185e-10
		0.0229	-1.28233e-10	-2.84547e-10		0.0229	-3.43203e-12	-7.14487e-10	-1.17937e-10
		0.02292	-1.28233e-10	-2.84859e-10		0.02292	-1.56001e-12	-7.14487e-10	-1.16689e-10
		0.02294	-1.27609e-10	-2.85795e-10		0.02294	-1.24801e-12	-7.16359e-10	-1.14817e-10
		0.02296	-1.27609e-10	-2.86419e-10		0.02296	-9.36009e-13	-7.16359e-10	-1.12321e-10
		0.02298	-1.26361e-10	-2.85483e-10		0.02298	-2.18402e-12	-7.17607e-10	-1.09825e-10
		0.023	-1.26361e-10	-2.83611e-10		0.023	-2.80803e-12	-7.19479e-10	-1.07953e-10
		0.02302	-1.26049e-10	-2.80491e-10		0.02302	-4.99205e-12	-7.20727e-10	-1.08577e-10
		0.02304	-1.26361e-10	-2.77995e-10		0.02304	-5.30405e-12	-7.20727e-10	-1.10449e-10
		0.02306	-1.26985e-10	-2.76435e-10		0.02306	-5.30405e-12	-7.21351e-10	-1.10449e-10
		0.02308	-1.27609e-10	-2.74875e-10		0.02308	-4.99205e-12	-7.20103e-10	-1.12321e-10
		0.0231	-1.28545e-10	-2.74563e-10		0.0231	-4.68004e-12	-7.19479e-10	-1.12945e-10
		0.02312	-1.30417e-10	-2.74563e-10		0.02312	-4.05604e-12	-7.18231e-10	-1.12321e-10
		0.02314	-1.31353e-10	-2.76435e-10		0.02314	-4.99205e-12	-7.17607e-10	-1.12945e-10
		0.02316	-1.33225e-10	-2.77371e-10		0.02316	-5.30405e-12	-7.15735e-10	-1.12321e-10
		0.02318	-1.34161e-10	-2.77371e-10		0.02318	-5.92806e-12	-7.15111e-10	-1.11697e-10
		0.0232	-1.36033e-10	-2.78619e-10		0.0232	-5.61605e-12	-7.16359e-10	-1.12321e-10
		0.02322	-1.37281e-10	-2.78619e-10		0.02322	-5.61605e-12	-7.17607e-10	-1.13569e-10
		0.02324	-1.38217e-10	-2.78931e-10		0.02324	-4.68004e-12	-7.18855e-10	-1.14817e-10
		0.02326	-1.37281e-10	-2.79555e-10		0.02326	-4.05604e-12	-7.19479e-10	-1.14193e-10
		0.02328	-1.35409e-10	-2.79243e-10		0.02328	-3.43203e-12	-7.21975e-10	-1.12945e-10
		0.0233	-1.33225e-10	-2.79555e-10		0.0233	-3.74404e-12	-7.20727e-10	-1.09825e-10
		0.02332	-1.32289e-10	-2.80803e-10		0.02332	-4.68004e-12	-7.19479e-10	-1.09825e-10
		0.02334	-1.30417e-10	-2.81427e-10		0.02334	-4.36804e-12	-7.18231e-10	-1.11697e-10
		0.02336	-1.30105e-10	-2.82363e-10		0.02336	-5.92806e-12	-7.18231e-10	-1.12945e-10
		0.02338	-1.31665e-10	-2.82363e-10		0.02338	-5.30405e-12	-7.18855e-10	-1.14193e-10
		0.0234	-1.32289e-10	-2.82675e-10		0.0234	-4.99205e-12	-7.21351e-10	-1.14193e-10
		0.02342	-1.32913e-10	-2.83299e-10		0.02342	-4.05604e-12	-7.23223e-10	-1.13569e-10
		0.02344	-1.31665e-10	-2.83611e-10		0.02344	-3.74404e-12	-7.24471e-10	-1.13569e-10
		0.02346	-1.30105e-10	-2.83923e-10		0.02346	-3.43203e-12	-7.25719e-10	-1.12321e-10
		0.02348	-1.28233e-10	-2.84547e-10		0.02348	-2.49602e-12	-7.23223e-10	-1.12321e-10
		0.0235	-1.27921e-10	-2.83299e-10		0.0235	-9.36009e-13	-7.21351e-10	-1.12321e-10
		0.02352	-1.29481e-10	-2.83611e-10		0.02352	9.36009e-13	-7.18855e-10	-1.13569e-10
		0.02354	-1.30417e-10	-2.83923e-10		0.02354	1.24801e-12	-7.18855e-10	-1.15441e-10
		0.02356	-1.32289e-10	-2.83923e-10		0.02356	1.56001e-12	-7.20727e-10	-1.15441e-10
		0.02358	-1.33537e-10	-2.84859e-10		0.02358	1.56001e-12	-7.20103e-10	-1.13569e-10
		0.0236	-1.34785e-10	-2.86107e-10		0.0236	3.12003e-13	-7.20103e-10	-1.14193e-10
		0.02362	-1.35721e-10	-2.87043e-10		0.02362	-9.36009e-13	-7.22599e-10	-1.14193e-10
		0.02364	-1.36345e-10	-2.86731e-10		0.02364	-1.56001e-12	-7.21351e-10	-1.12321e-10
		0.02366	-1.37593e-10	-2.85483e-10		0.02366	-2.49602e-12	-7.20103e-10	-1.11697e-10
		0.02368	-1.37281e-10	-2.84859e-10		0.02368	-3.12003e-12	-7.19479e-10	-1.09825e-10
		0.0237	-1.37593e-10	-2.83611e-10		0.0237	-3.43203e-12	-7.20727e-10	-1.11073e-10
		0.02372	-1.37281e-10	-2.82675e-10		0.02372	-2.80803e-12	-7.19479e-10	-1.10449e-10
		0.02374	-1.38217e-10	-2.82987e-10		0.02374	-3.74404e-12	-7.18231e-10	-1.11697e-10
		0.02376	-1.37905e-10	-2.82987e-10		0.02376	-3.74404e-12	-7.18855e-10	-1.12945e-10
		0.02378	-1.36969e-10	-2.83923e-10		0.02378	-3.43203e-12	-7.18855e-10	-1.16065e-10
		0.0238	-1.36033e-10	-2.83611e-10		0.0238	-2.49602e-12	-7.20103e-10	-1.19185e-10
		0.02382	-1.34473e-10	-2.83299e-10		0.02382	-2.18402e-12	-7.20727e-10	-1.20433e-10
		0.02384	-1.32913e-10	-2.82675e-10		0.02384	-3.12003e-12	-7.19479e-10	-1.21057e-10
		0.02386	-1.33225e-10	-2.81739e-10		0.02386	-3.12003e-12	-7.18855e-10	-1.21681e-10
		0.02388	-1.33225e-10	-2.81115e-10		0.02388	-3.74404e-12	-7.17607e-10	-1.22305e-10
		0.0239	-1.33849e-10	-2.81115e-10		0.0239	-3.74404e-12	-7.16983e-10	-1.21681e-10
		0.02392	-1.33849e-10	-2.82051e-10		0.02392	-3.43203e-12	-7.16359e-10	-1.21057e-10
		0.02394	-1.34161e-10	-2.83299e-10		0.02394	-3.43203e-12	-7.16359e-10	-1.19809e-10
		0.02396	-1.33849e-10	-2.83611e-10		0.02396	-3.43203e-12	-7.13239e-10	-1.18561e-10
		0.02398	-1.34785e-10	-2.83923e-10		0.02398	-2.80803e-12	-7.13863e-10	-1.17937e-10
		0.024	-1.35721e-10	-2.83611e-10		0.024	-3.12003e-12	-7.11367e-10	-1.18561e-10
		0.02402	-1.36657e-10	-2.82363e-10		0.02402	-2.80803e-12	-7.11367e-10	-1.17313e-10
		0.02404	-1.37905e-10	-2.81739e-10		0.02404	-2.80803e-12	-7.11367e-10	-1.17313e-10
		0.02406	-1.39465e-10	-2.79555e-10		0.02406	-2.49602e-12	-7.11991e-10	-1.16689e-10
		0.02408	-1.40713e-10	-2.78307e-10		0.02408	-2.49602e-12	-7.13239e-10	-1.14193e-10
		0.0241	-1.41649e-10	-2.77371e-10		0.0241	-2.49602e-12	-7.15735e-10	-1.11697e-10
		0.02412	-1.40401e-10	-2.75811e-10		0.02412	-2.18402e-12	-7.15735e-10	-1.12321e-10
		0.02414	-1.38841e-10	-2.76747e-10		0.02414	-1.87202e-12	-7.16983e-10	-1.11073e-10
		0.02416	-1.36033e-10	-2.77995e-10		0.02416	-1.87202e-12	-7.18231e-10	-1.09825e-10
		0.02418	-1.33849e-10	-2.79243e-10		0.02418	-2.80803e-12	-7.18231e-10	-1.11697e-10
		0.0242	-1.33537e-10	-2.79555e-10		0.0242	-3.12003e-12	-7.17607e-10	-1.11073e-10
		0.02422	-1.32913e-10	-2.79243e-10		0.02422	-2.80803e-12	-7.18855e-10	-1.14193e-10
		0.02424	-1.31041e-10	-2.80491e-10		0.02424	-3.74404e-12	-7.18855e-10	-1.14817e-10
		0.02426	-1.30105e-10	-2.81427e-10		0.02426	-3.12003e-12	-7.19479e-10	-1.14193e-10
		0.02428	-1.28233e-10	-2.83299e-10		0.02428	-3.74404e-12	-7.19479e-10	-1.13569e-10
		0.0243	-1.26985e-10	-2.83611e-10		0.0243	-4.99205e-12	-7.18231e-10	-1.15441e-10
		0.02432	-1.25737e-10	-2.84235e-10		0.02432	-4.99205e-12	-7.17607e-10	-1.14193e-10
		0.02434	-1.26361e-10	-2.82987e-10		0.02434	-4.99205e-12	-7.16359e-10	-1.13569e-10
		0.02436	-1.27921e-10	-2.81427e-10		0.02436	-5.92806e-12	-7.15735e-10	-1.14193e-10
		0.02438	-1.30417e-10	-2.79555e-10		0.02438	-6.55206e-12	-7.15735e-10	-1.14193e-10
		0.0244	-1.31665e-10	-2.77059e-10		0.0244	-6.24006e-12	-7.16359e-10	-1.14193e-10
		0.02442	-1.32601e-10	-2.75811e-10		0.02442	-5.61605e-12	-7.15735e-10	-1.13569e-10
		0.02444	-1.33849e-10	-2.75499e-10		0.02444	-5.61605e-12	-7.19479e-10	-1.14817e-10
		0.02446	-1.35409e-10	-2.75499e-10		0.02446	-4.68004e-12	-7.16359e-10	-1.13569e-10
		0.02448	-1.35097e-10	-2.75811e-10		0.02448	-3.12003e-12	-7.16359e-10	-1.13569e-10
		0.0245	-1.35097e-10	-2.75187e-10		0.0245	-3.12003e-12	-7.17607e-10	-1.13569e-10
		0.02452	-1.34785e-10	-2.74875e-10		0.02452	-2.49602e-12	-7.18231e-10	-1.12321e-10
		0.02454	-1.33225e-10	-2.74875e-10		0.02454	-2.18402e-12	-7.18231e-10	-1.13569e-10
		0.02456	-1.32913e-10	-2.74875e-10		0.02456	-2.49602e-12	-7.19479e-10	-1.14817e-10
		0.02458	-1.30417e-10	-2.75499e-10		0.02458	-2.49602e-12	-7.18855e-10	-1.15441e-10
		0.0246	-1.28545e-10	-2.74251e-10		0.0246	-2.18402e-12	-7.19479e-10	-1.14817e-10
		0.02462	-1.27609e-10	-2.73939e-10		0.02462	-2.49602e-12	-7.18231e-10	-1.16065e-10
		0.02464	-1.25737e-10	-2.74251e-10		0.02464	-2.80803e-12	-7.16983e-10	-1.16065e-10
		0.02466	-1.25425e-10	-2.73315e-10		0.02466	-3.43203e-12	-7.16359e-10	-1.15441e-10
		0.02468	-1.25113e-10	-2.73003e-10		0.02468	-3.74404e-12	-7.15111e-10	-1.15441e-10
		0.0247	-1.26985e-10	-2.72691e-10		0.0247	-3.74404e-12	-7.16359e-10	-1.16689e-10
		0.02472	-1.30105e-10	-2.72691e-10		0.02472	-4.05604e-12	-7.18231e-10	-1.16065e-10
		0.02474	-1.31041e-10	-2.73003e-10		0.02474	-3.43203e-12	-7.17607e-10	-1.16689e-10
		0.02476	-1.32289e-10	-2.73315e-10		0.02476	-3.74404e-12	-7.18231e-10	-1.16065e-10
		0.02478	-1.31977e-10	-2.74875e-10		0.02478	-4.05604e-12	-7.19479e-10	-1.15441e-10
		0.0248	-1.31041e-10	-2.76747e-10		0.0248	-3.74404e-12	-7.19479e-10	-1.14193e-10
		0.02482	-1.29793e-10	-2.78307e-10		0.02482	-3.12003e-12	-7.19479e-10	-1.13569e-10
		0.02484	-1.29793e-10	-2.80179e-10		0.02484	-3.12003e-12	-7.18855e-10	-1.14817e-10
		0.02486	-1.28545e-10	-2.81115e-10		0.02486	-2.80803e-12	-7.19479e-10	-1.13569e-10
		0.02488	-1.28545e-10	-2.79867e-10		0.02488	-1.24801e-12	-7.19479e-10	-1.14193e-10
		0.0249	-1.29793e-10	-2.80491e-10		0.0249	-1.24801e-12	-7.21351e-10	-1.14193e-10
		0.02492	-1.30105e-10	-2.79867e-10		0.02492	-9.36009e-13	-7.22599e-10	-1.11697e-10
		0.02494	-1.30417e-10	-2.80179e-10		0.02494	-9.36009e-13	-7.22599e-10	-1.11073e-10
		0.02496	-1.30729e-10	-2.81115e-10		0.02496	-1.87202e-12	-7.21351e-10	-1.11697e-10
		0.02498	-1.30105e-10	-2.82051e-10		0.02498	-1.87202e-12	-7.20727e-10	-1.11697e-10
		0.025	-1.31977e-10	-2.81427e-10		0.025	-3.74404e-12	-7.19479e-10	-1.13569e-10
		0.02502	-1.32601e-10	-2.81115e-10		0.02502	-4.36804e-12	-7.18855e-10	-1.14817e-10
		0.02504	-1.33849e-10	-2.80491e-10		0.02504	-6.24006e-12	-7.18855e-10	-1.15441e-10
		0.02506	-1.33849e-10	-2.80179e-10		0.02506	-7.48807e-12	-7.18855e-10	-1.13569e-10
		0.02508	-1.33849e-10	-2.78931e-10		0.02508	-9.04808e-12	-7.20103e-10	-1.13569e-10
		0.0251	-1.32913e-10	-2.78619e-10		0.0251	-1.02961e-11	-7.20727e-10	-1.12321e-10
		0.02512	-1.33225e-10	-2.78619e-10		0.02512	-1.15441e-11	-7.20727e-10	-1.09201e-10
		0.02514	-1.32601e-10	-2.80803e-10		0.02514	-1.18561e-11	-7.20103e-10	-1.09825e-10
		0.02516	-1.32913e-10	-2.82051e-10		0.02516	-1.18561e-11	-7.19479e-10	-1.10449e-10
		0.02518	-1.33537e-10	-2.83611e-10		0.02518	-1.06081e-11	-7.18855e-10	-1.09825e-10
		0.0252	-1.34473e-10	-2.84547e-10		0.0252	-9.98409e-12	-7.18855e-10	-1.13569e-10
		0.02522	-1.36033e-10	-2.85171e-10		0.02522	-9.36009e-12	-7.20103e-10	-1.13569e-10
		0.02524	-1.36969e-10	-2.86419e-10		0.02524	-7.80007e-12	-7.20103e-10	-1.16065e-10
		0.02526	-1.36657e-10	-2.86419e-10		0.02526	-7.80007e-12	-7.20103e-10	-1.16065e-10
		0.02528	-1.35721e-10	-2.85171e-10		0.02528	-7.48807e-12	-7.20727e-10	-1.16065e-10
		0.0253	-1.34161e-10	-2.84859e-10		0.0253	-6.24006e-12	-7.19479e-10	-1.14817e-10
		0.02532	-1.33537e-10	-2.84235e-10		0.02532	-6.24006e-12	-7.18855e-10	-1.15441e-10
		0.02534	-1.31977e-10	-2.84235e-10		0.02534	-6.86406e-12	-7.20103e-10	-1.16065e-10
		0.02536	-1.32913e-10	-2.83299e-10		0.02536	-5.61605e-12	-7.19479e-10	-1.16065e-10
		0.02538	-1.33537e-10	-2.81739e-10		0.02538	-6.55206e-12	-7.20103e-10	-1.16689e-10
		0.0254	-1.33849e-10	-2.82675e-10		0.0254	-7.80007e-12	-7.20103e-10	-1.16689e-10
		0.02542	-1.34473e-10	-2.82363e-10		0.02542	-8.11208e-12	-7.21351e-10	-1.17313e-10
		0.02544	-1.33537e-10	-2.82363e-10		0.02544	-9.67209e-12	-7.21351e-10	-1.17313e-10
		0.02546	-1.33225e-10	-2.83299e-10		0.02546	-1.02961e-11	-7.22599e-10	-1.15441e-10
		0.02548	-1.33225e-10	-2.83299e-10		0.02548	-9.98409e-12	-7.21351e-10	-1.13569e-10
		0.0255	-1.34473e-10	-2.82675e-10		0.0255	-9.04808e-12	-7.20103e-10	-1.12321e-10
		0.02552	-1.35721e-10	-2.80803e-10		0.02552	-7.80007e-12	-7.23223e-10	-1.12945e-10
		0.02554	-1.38217e-10	-2.78931e-10		0.02554	-6.55206e-12	-7.21975e-10	-1.13569e-10
		0.02556	-1.39465e-10	-2.77683e-10		0.02556	-6.55206e-12	-7.21351e-10	-1.14817e-10
		0.02558	-1.39153e-10	-2.75811e-10		0.02558	-5.30405e-12	-7.21351e-10	-1.16065e-10
		0.0256	-1.37281e-10	-2.76123e-10		0.0256	-5.61605e-12	-7.19479e-10	-1.16689e-10
		0.02562	-1.34785e-10	-2.77059e-10		0.02562	-5.61605e-12	-7.18855e-10	-1.14817e-10
		0.02564	-1.32913e-10	-2.78307e-10		0.02564	-6.24006e-12	-7.17607e-10	-1.15441e-10
		0.02566	-1.31665e-10	-2.78931e-10		0.02566	-6.24006e-12	-7.15735e-10	-1.14817e-10
		0.02568	-1.31041e-10	-2.79243e-10		0.02568	-5.30405e-12	-7.16983e-10	-1.13569e-10
		0.0257	-1.33537e-10	-2.78619e-10		0.0257	-4.68004e-12	-7.16983e-10	-1.14817e-10
		0.02572	-1.35721e-10	-2.78931e-10		0.02572	-4.05604e-12	-7.17607e-10	-1.13569e-10
		0.02574	-1.38217e-10	-2.80491e-10		0.02574	-3.12003e-12	-7.20103e-10	-1.12321e-10
		0.02576	-1.37905e-10	-2.81739e-10		0.02576	-2.18402e-12	-7.20727e-10	-1.12321e-10
		0.02578	-1.36657e-10	-2.84547e-10		0.02578	-2.80803e-12	-7.18855e-10	-1.11697e-10
		0.0258	-1.34161e-10	-2.87043e-10		0.0258	-2.80803e-12	-7.20103e-10	-1.12321e-10
		0.02582	-1.33225e-10	-2.88915e-10		0.02582	-2.80803e-12	-7.18855e-10	-1.13569e-10
		0.02584	-1.31353e-10	-2.89851e-10		0.02584	-4.36804e-12	-7.18855e-10	-1.13569e-10
		0.02586	-1.32289e-10	-2.89539e-10		0.02586	-4.68004e-12	-7.18855e-10	-1.14817e-10
		0.02588	-1.33225e-10	-2.89539e-10		0.02588	-5.30405e-12	-7.18855e-10	-1.14817e-10
		0.0259	-1.34785e-10	-2.88603e-10		0.0259	-4.68004e-12	-7.18855e-10	-1.15441e-10
		0.02592	-1.34473e-10	-2.87355e-10		0.02592	-5.30405e-12	-7.18231e-10	-1.14817e-10
		0.02594	-1.34785e-10	-2.87667e-10		0.02594	-4.99205e-12	-7.16983e-10	-1.16065e-10
		0.02596	-1.33849e-10	-2.85795e-10		0.02596	-4.36804e-12	-7.18231e-10	-1.14193e-10
		0.02598	-1.34161e-10	-2.84859e-10		0.02598	-3.74404e-12	-7.18855e-10	-1.14193e-10
		0.026	-1.32601e-10	-2.83299e-10		0.026	-2.80803e-12	-7.17607e-10	-1.15441e-10
		0.02602	-1.32913e-10	-2.82051e-10		0.02602	-2.18402e-12	-7.18855e-10	-1.18561e-10
		0.02604	-1.32601e-10	-2.80491e-10		0.02604	-6.24006e-13	-7.21975e-10	-1.19185e-10
		0.02606	-1.33849e-10	-2.79867e-10		0.02606	-6.24006e-13	-7.22599e-10	-1.20433e-10
		0.02608	-1.34785e-10	-2.80491e-10		0.02608	-6.24006e-13	-7.23847e-10	-1.19809e-10
		0.0261	-1.35097e-10	-2.79867e-10		0.0261	6.24006e-13	-7.23847e-10	-1.19809e-10
		0.02612	-1.33537e-10	-2.79555e-10		0.02612	-6.24006e-13	-7.21351e-10	-1.16689e-10
		0.02614	-1.31665e-10	-2.77371e-10		0.02614	-1.24801e-12	-7.19479e-10	-1.15441e-10
		0.02616	-1.29169e-10	-2.76747e-10		0.02616	-1.24801e-12	-7.18855e-10	-1.14817e-10
		0.02618	-1.27921e-10	-2.76747e-10		0.02618	-1.87202e-12	-7.16983e-10	-1.14817e-10
		0.0262	-1.28233e-10	-2.76123e-10		0.0262	-1.87202e-12	-7.16983e-10	-1.13569e-10
		0.02622	-1.27921e-10	-2.76123e-10		0.02622	-9.36009e-13	-7.16359e-10	-1.16065e-10
		0.02624	-1.28545e-10	-2.77059e-10		0.02624	-6.24006e-13	-7.15735e-10	-1.14193e-10
		0.02626	-1.29169e-10	-2.78307e-10		0.02626	-1.87202e-12	-7.16359e-10	-1.12321e-10
		0.02628	-1.29481e-10	-2.79867e-10		0.02628	-3.12003e-13	-7.15111e-10	-1.14193e-10
		0.0263	-1.28857e-10	-2.79867e-10		0.0263	-6.24006e-13	-7.14487e-10	-1.12945e-10
		0.02632	-1.27609e-10	-2.79555e-10		0.02632	-1.56001e-12	-7.13863e-10	-1.14193e-10
		0.02634	-1.26673e-10	-2.79555e-10		0.02634	-2.18402e-12	-7.13239e-10	-1.13569e-10
		0.02636	-1.26361e-10	-2.79243e-10		0.02636	-2.49602e-12	-7.13239e-10	-1.14817e-10
		0.02638	-1.25737e-10	-2.79555e-10		0.02638	-2.80803e-12	-7.15735e-10	-1.14817e-10
		0.0264	-1.26985e-10	-2.80491e-10		0.0264	-2.18402e-12	-7.16359e-10	-1.14817e-10
		0.02642	-1.27921e-10	-2.80803e-10		0.02642	-2.18402e-12	-7.17607e-10	-1.14193e-10
		0.02644	-1.29169e-10	-2.82363e-10		0.02644	-2.49602e-12	-7.20103e-10	-1.13569e-10
		0.02646	-1.30417e-10	-2.82675e-10		0.02646	-2.49602e-12	-7.20103e-10	-1.11697e-10
		0.02648	-1.30105e-10	-2.82051e-10		0.02648	-2.80803e-12	-7.21351e-10	-1.11073e-10
		0.0265	-1.31353e-10	-2.80803e-10		0.0265	-2.80803e-12	-7.18855e-10	-1.12321e-10
		0.02652	-1.31977e-10	-2.79555e-10		0.02652	-9.36009e-13	-7.18855e-10	-1.13569e-10
		0.02654	-1.33225e-10	-2.78619e-10		0.02654	-3.12003e-13	-7.18231e-10	-1.15441e-10
		0.02656	-1.33537e-10	-2.76435e-10		0.02656	3.12003e-13	-7.18855e-10	-1.17313e-10
		0.02658	-1.33537e-10	-2.75187e-10		0.02658	6.24006e-13	-7.17607e-10	-1.17313e-10
		0.0266	-1.32601e-10	-2.75187e-10		0.0266	6.24006e-13	-7.18855e-10	-1.16689e-10
		0.02662	-1.31041e-10	-2.74251e-10		0.02662	9.36009e-13	-7.19479e-10	-1.16065e-10
		0.02664	-1.30729e-10	-2.74563e-10		0.02664	0	-7.18231e-10	-1.16065e-10
		0.02666	-1.31353e-10	-2.75187e-10		0.02666	-6.24006e-13	-7.15735e-10	-1.14817e-10
		0.02668	-1.32289e-10	-2.75499e-10		0.02668	-1.24801e-12	-7.17607e-10	-1.16065e-10
		0.0267	-1.33537e-10	-2.75811e-10		0.0267	-9.36009e-13	-7.18855e-10	-1.16065e-10
		0.02672	-1.35409e-10	-2.75811e-10		0.02672	-2.80803e-12	-7.22599e-10	-1.17313e-10
		0.02674	-1.36969e-10	-2.77059e-10		0.02674	-2.18402e-12	-7.24471e-10	-1.16689e-10
		0.02676	-1.36657e-10	-2.76435e-10		0.02676	-3.12003e-12	-7.25719e-10	-1.16065e-10
		0.02678	-1.36657e-10	-2.76123e-10		0.02678	-3.12003e-12	-7.26343e-10	-1.14817e-10
		0.0268	-1.36345e-10	-2.75499e-10		0.0268	-4.05604e-12	-7.24471e-10	-1.12945e-10
		0.02682	-1.36033e-10	-2.75811e-10		0.02682	-3.12003e-12	-7.23223e-10	-1.12321e-10
		0.02684	-1.35409e-10	-2.75187e-10		0.02684	-4.05604e-12	-7.20103e-10	-1.12321e-10
		0.02686	-1.35097e-10	-2.76435e-10		0.02686	-2.49602e-12	-7.18855e-10	-1.12321e-10
		0.02688	-1.33849e-10	-2.77995e-10		0.02688	-2.18402e-12	-7.17607e-10	-1.12945e-10
		0.0269	-1.33225e-10	-2.77995e-10		0.0269	-6.24006e-13	-7.16359e-10	-1.14817e-10
		0.02692	-1.32289e-10	-2.79867e-10		0.02692	-6.24006e-13	-7.16359e-10	-1.15441e-10
		0.02694	-1.31665e-10	-2.80803e-10		0.02694	-6.24006e-13	-7.16359e-10	-1.14817e-10
		0.02696	-1.30729e-10	-2.82051e-10		0.02696	-9.36009e-13	-7.15111e-10	-1.13569e-10
		0.02698	-1.29481e-10	-2.82051e-10		0.02698	-1.24801e-12	-7.16983e-10	-1.12945e-10
		0.027	-1.29169e-10	-2.80803e-10		0.027	-2.80803e-12	-7.16983e-10	-1.14817e-10
		0.02702	-1.29793e-10	-2.80803e-10		0.02702	-3.74404e-12	-7.18231e-10	-1.16689e-10
		0.02704	-1.31353e-10	-2.78307e-10		0.02704	-3.74404e-12	-7.20727e-10	-1.16065e-10
		0.02706	-1.31353e-10	-2.77059e-10		0.02706	-3.43203e-12	-7.20727e-10	-1.16065e-10
		0.02708	-1.31977e-10	-2.75811e-10		0.02708	-2.18402e-12	-7.21351e-10	-1.17937e-10
		0.0271	-1.32913e-10	-2.75187e-10		0.0271	-1.24801e-12	-7.20103e-10	-1.16689e-10
		0.02712	-1.32601e-10	-2.73315e-10		0.02712	3.12003e-13	-7.19479e-10	-1.16689e-10
		0.02714	-1.32601e-10	-2.72691e-10		0.02714	-3.12003e-13	-7.17607e-10	-1.16689e-10
		0.02716	-1.32289e-10	-2.71755e-10		0.02716	-1.56001e-12	-7.16983e-10	-1.16689e-10
		0.02718	-1.31977e-10	-2.71443e-10		0.02718	-3.12003e-12	-7.17607e-10	-1.16065e-10
		0.0272	-1.32601e-10	-2.71755e-10		0.0272	-3.74404e-12	-7.17607e-10	-1.15441e-10
		0.02722	-1.32601e-10	-2.71755e-10		0.02722	-3.74404e-12	-7.17607e-10	-1.14817e-10
		0.02724	-1.33849e-10	-2.72691e-10		0.02724	-4.36804e-12	-7.17607e-10	-1.16689e-10
		0.02726	-1.33849e-10	-2.73627e-10		0.02726	-4.05604e-12	-7.17607e-10	-1.14817e-10
		0.02728	-1.33225e-10	-2.75187e-10		0.02728	-5.30405e-12	-7.16983e-10	-1.13569e-10
		0.0273	-1.32601e-10	-2.75811e-10		0.0273	-4.99205e-12	-7.16359e-10	-1.12945e-10
		0.02732	-1.31353e-10	-2.74563e-10		0.02732	-4.99205e-12	-7.18231e-10	-1.12945e-10
		0.02734	-1.28857e-10	-2.73003e-10		0.02734	-3.74404e-12	-7.18231e-10	-1.11073e-10
		0.02736	-1.26673e-10	-2.71443e-10		0.02736	-3.43203e-12	-7.18855e-10	-1.12945e-10
		0.02738	-1.25425e-10	-2.68947e-10		0.02738	-9.36009e-13	-7.20727e-10	-1.12321e-10
		0.0274	-1.24489e-10	-2.67699e-10		0.0274	-3.12003e-13	-7.22599e-10	-1.13569e-10
		0.02742	-1.23241e-10	-2.65514e-10		0.02742	6.24006e-13	-7.24471e-10	-1.14193e-10
		0.02744	-1.23553e-10	-2.6489e-10		0.02744	-3.12003e-13	-7.25095e-10	-1.14817e-10
		0.02746	-1.24177e-10	-2.65202e-10		0.02746	-9.36009e-13	-7.25095e-10	-1.14817e-10
		0.02748	-1.24177e-10	-2.66763e-10		0.02748	-1.56001e-12	-7.22599e-10	-1.14817e-10
		0.0275	-1.25113e-10	-2.67075e-10		0.0275	-2.49602e-12	-7.21975e-10	-1.14193e-10
		0.02752	-1.26673e-10	-2.66138e-10		0.02752	-2.80803e-12	-7.20727e-10	-1.14817e-10
		0.02754	-1.29169e-10	-2.6645e-10		0.02754	-2.49602e-12	-7.19479e-10	-1.12945e-10
		0.02756	-1.32289e-10	-2.67075e-10		0.02756	-3.43203e-12	-7.20103e-10	-1.12321e-10
		0.02758	-1.34785e-10	-2.67699e-10		0.02758	-2.80803e-12	-7.21351e-10	-1.12321e-10
		0.0276	-1.36969e-10	-2.67075e-10		0.0276	-2.49602e-12	-7.20727e-10	-1.11697e-10
		0.02762	-1.36969e-10	-2.67075e-10		0.02762	-2.49602e-12	-7.22599e-10	-1.11697e-10
		0.02764	-1.36345e-10	-2.67075e-10		0.02764	-2.80803e-12	-7.23847e-10	-1.11697e-10
		0.02766	-1.36657e-10	-2.67075e-10		0.02766	-3.12003e-12	-7.23847e-10	-1.15441e-10
		0.02768	-1.36345e-10	-2.68635e-10		0.02768	-3.12003e-12	-7.25095e-10	-1.15441e-10
		0.0277	-1.36033e-10	-2.68635e-10		0.0277	-2.80803e-12	-7.25719e-10	-1.17937e-10
		0.02772	-1.36969e-10	-2.69259e-10		0.02772	-2.80803e-12	-7.23847e-10	-1.19809e-10
		0.02774	-1.37281e-10	-2.69571e-10		0.02774	-3.43203e-12	-7.24471e-10	-1.21681e-10
		0.02776	-1.37905e-10	-2.70195e-10		0.02776	-3.74404e-12	-7.23223e-10	-1.20433e-10
		0.02778	-1.36969e-10	-2.70819e-10		0.02778	-4.68004e-12	-7.21351e-10	-1.20433e-10
		0.0278	-1.35721e-10	-2.70819e-10		0.0278	-4.99205e-12	-7.20727e-10	-1.17937e-10
		0.02782	-1.34161e-10	-2.69571e-10		0.02782	-5.30405e-12	-7.18231e-10	-1.15441e-10
		0.02784	-1.32601e-10	-2.69259e-10		0.02784	-4.68004e-12	-7.17607e-10	-1.13569e-10
		0.02786	-1.31977e-10	-2.69259e-10		0.02786	-4.05604e-12	-7.19479e-10	-1.13569e-10
		0.02788	-1.30729e-10	-2.69883e-10		0.02788	-3.12003e-12	-7.20103e-10	-1.12945e-10
		0.0279	-1.30417e-10	-2.69883e-10		0.0279	-3.12003e-12	-7.20727e-10	-1.14193e-10
		0.02792	-1.29793e-10	-2.71443e-10		0.02792	-3.43203e-12	-7.23847e-10	-1.12321e-10
		0.02794	-1.28545e-10	-2.71755e-10		0.02794	-3.74404e-12	-7.24471e-10	-1.11697e-10
		0.02796	-1.26985e-10	-2.72379e-10		0.02796	-4.05604e-12	-7.22599e-10	-1.10449e-10
		0.02798	-1.26361e-10	-2.73003e-10		0.02798	-5.30405e-12	-7.20727e-10	-1.11073e-10
		0.028	-1.25737e-10	-2.73627e-10		0.028	-6.55206e-12	-7.21975e-10	-1.11073e-10
		0.02802	-1.27297e-10	-2.73939e-10		0.02802	-6.86406e-12	-7.19479e-10	-1.11697e-10
		0.02804	-1.29793e-10	-2.73003e-10		0.02804	-6.24006e-12	-7.18231e-10	-1.12321e-10
		0.02806	-1.31041e-10	-2.71443e-10		0.02806	-4.99205e-12	-7.18231e-10	-1.14193e-10
		0.02808	-1.31665e-10	-2.70507e-10		0.02808	-4.68004e-12	-7.18231e-10	-1.12321e-10
		0.0281	-1.31977e-10	-2.69259e-10		0.0281	-3.43203e-12	-7.18231e-10	-1.13569e-10
		0.02812	-1.30729e-10	-2.69259e-10		0.02812	-2.18402e-12	-7.16359e-10	-1.14817e-10
		0.02814	-1.27921e-10	-2.70195e-10		0.02814	-2.18402e-12	-7.17607e-10	-1.14817e-10
		0.02816	-1.25737e-10	-2.71131e-10		0.02816	-3.12003e-12	-7.17607e-10	-1.15441e-10
		0.02818	-1.24177e-10	-2.72379e-10		0.02818	-3.12003e-12	-7.17607e-10	-1.15441e-10
		0.0282	-1.23553e-10	-2.73003e-10		0.0282	-3.12003e-12	-7.17607e-10	-1.15441e-10
		0.02822	-1.23553e-10	-2.73003e-10		0.02822	-2.80803e-12	-7.16983e-10	-1.15441e-10
		0.02824	-1.23865e-10	-2.72067e-10		0.02824	-2.49602e-12	-7.18231e-10	-1.14817e-10
		0.02826	-1.25737e-10	-2.71443e-10		0.02826	-2.49602e-12	-7.18231e-10	-1.16689e-10
		0.02828	-1.26049e-10	-2.70195e-10		0.02828	-2.80803e-12	-7.16983e-10	-1.14817e-10
		0.0283	-1.28233e-10	-2.69571e-10		0.0283	-3.43203e-12	-7.16983e-10	-1.14817e-10
		0.02832	-1.29793e-10	-2.69259e-10		0.02832	-4.36804e-12	-7.15735e-10	-1.15441e-10
		0.02834	-1.31353e-10	-2.68947e-10		0.02834	-4.99205e-12	-7.15111e-10	-1.17937e-10
		0.02836	-1.32601e-10	-2.69259e-10		0.02836	-5.92806e-12	-7.15735e-10	-1.18561e-10
		0.02838	-1.34473e-10	-2.69571e-10		0.02838	-5.92806e-12	-7.16983e-10	-1.18561e-10
		0.0284	-1.35721e-10	-2.70819e-10		0.0284	-5.61605e-12	-7.17607e-10	-1.16689e-10
		0.02842	-1.37281e-10	-2.70819e-10		0.02842	-4.68004e-12	-7.16983e-10	-1.14193e-10
		0.02844	-1.35721e-10	-2.73315e-10		0.02844	-3.43203e-12	-7.16359e-10	-1.12321e-10
		0.02846	-1.33849e-10	-2.75187e-10		0.02846	-2.49602e-12	-7.14487e-10	-1.12321e-10
		0.02848	-1.31977e-10	-2.76747e-10		0.02848	-2.18402e-12	-7.15111e-10	-1.13569e-10
		0.0285	-1.28857e-10	-2.77371e-10		0.0285	-6.24006e-13	-7.13863e-10	-1.14193e-10
		0.02852	-1.27297e-10	-2.77371e-10		0.02852	6.24006e-13	-7.14487e-10	-1.15441e-10
		0.02854	-1.26673e-10	-2.76435e-10		0.02854	6.24006e-13	-7.16359e-10	-1.15441e-10
		0.02856	-1.27297e-10	-2.75811e-10		0.02856	9.36009e-13	-7.17607e-10	-1.16689e-10
		0.02858	-1.27921e-10	-2.74875e-10		0.02858	3.12003e-13	-7.17607e-10	-1.16689e-10
		0.0286	-1.29793e-10	-2.73939e-10		0.0286	0	-7.20103e-10	-1.16065e-10
		0.02862	-1.30729e-10	-2.73315e-10		0.02862	-2.18402e-12	-7.20727e-10	-1.16065e-10
		0.02864	-1.30417e-10	-2.73939e-10		0.02864	-4.05604e-12	-7.20103e-10	-1.16689e-10
		0.02866	-1.30417e-10	-2.73939e-10		0.02866	-4.99205e-12	-7.20727e-10	-1.16065e-10
		0.02868	-1.29169e-10	-2.74875e-10		0.02868	-5.61605e-12	-7.18855e-10	-1.16065e-10
		0.0287	-1.28857e-10	-2.75811e-10		0.0287	-5.92806e-12	-7.20103e-10	-1.14817e-10
		0.02872	-1.28545e-10	-2.75811e-10		0.02872	-4.99205e-12	-7.20727e-10	-1.14193e-10
		0.02874	-1.29481e-10	-2.76123e-10		0.02874	-4.36804e-12	-7.22599e-10	-1.14193e-10
		0.02876	-1.30417e-10	-2.74251e-10		0.02876	-2.80803e-12	-7.22599e-10	-1.12945e-10
		0.02878	-1.30417e-10	-2.73627e-10		0.02878	-2.18402e-12	-7.23847e-10	-1.11697e-10
		0.0288	-1.30729e-10	-2.72067e-10		0.0288	-1.87202e-12	-7.23847e-10	-1.12321e-10
		0.02882	-1.30729e-10	-2.70507e-10		0.02882	-2.18402e-12	-7.23223e-10	-1.11697e-10
		0.02884	-1.31041e-10	-2.69571e-10		0.02884	-1.87202e-12	-7.22599e-10	-1.12321e-10
		0.02886	-1.32601e-10	-2.68323e-10		0.02886	-3.12003e-12	-7.21351e-10	-1.15441e-10
		0.02888	-1.32601e-10	-2.67075e-10		0.02888	-3.12003e-12	-7.21351e-10	-1.17313e-10
		0.0289	-1.32913e-10	-2.68011e-10		0.0289	-3.43203e-12	-7.20103e-10	-1.17313e-10
		0.02892	-1.33225e-10	-2.69883e-10		0.02892	-4.36804e-12	-7.19479e-10	-1.17937e-10
		0.02894	-1.32913e-10	-2.71755e-10		0.02894	-4.68004e-12	-7.18855e-10	-1.16689e-10
		0.02896	-1.32289e-10	-2.74251e-10		0.02896	-4.05604e-12	-7.16359e-10	-1.14817e-10
		0.02898	-1.30417e-10	-2.75187e-10		0.02898	-4.99205e-12	-7.15111e-10	-1.12321e-10
		0.029	-1.29793e-10	-2.75811e-10		0.029	-5.61605e-12	-7.14487e-10	-1.11697e-10
		0.02902	-1.28233e-10	-2.75499e-10		0.02902	-4.99205e-12	-7.13863e-10	-1.11073e-10
		0.02904	-1.28233e-10	-2.73939e-10		0.02904	-4.99205e-12	-7.15111e-10	-1.11073e-10
		0.02906	-1.27921e-10	-2.72067e-10		0.02906	-4.36804e-12	-7.15111e-10	-1.12321e-10
		0.02908	-1.27921e-10	-2.70819e-10		0.02908	-4.05604e-12	-7.15735e-10	-1.13569e-10
		0.0291	-1.27921e-10	-2.69571e-10		0.0291	-3.43203e-12	-7.16359e-10	-1.14193e-10
		0.02912	-1.28233e-10	-2.70819e-10		0.02912	-3.74404e-12	-7.15735e-10	-1.12945e-10
		0.02914	-1.29481e-10	-2.71443e-10		0.02914	-4.99205e-12	-7.16983e-10	-1.12945e-10
		0.02916	-1.30729e-10	-2.72067e-10		0.02916	-5.92806e-12	-7.16359e-10	-1.12945e-10
		0.02918	-1.31977e-10	-2.73627e-10		0.02918	-6.86406e-12	-7.16359e-10	-1.09825e-10
		0.0292	-1.33225e-10	-2.73003e-10		0.0292	-7.48807e-12	-7.15735e-10	-1.11073e-10
		0.02922	-1.33225e-10	-2.73939e-10		0.02922	-7.48807e-12	-7.15735e-10	-1.10449e-10
		0.02924	-1.32601e-10	-2.73003e-10		0.02924	-6.86406e-12	-7.15735e-10	-1.10449e-10
		0.02926	-1.31665e-10	-2.73315e-10		0.02926	-5.92806e-12	-7.16359e-10	-1.10449e-10
		0.02928	-1.30105e-10	-2.73003e-10		0.02928	-4.68004e-12	-7.15111e-10	-1.12321e-10
		0.0293	-1.28233e-10	-2.71443e-10		0.0293	-4.36804e-12	-7.15735e-10	-1.09825e-10
		0.02932	-1.27297e-10	-2.70195e-10		0.02932	-4.68004e-12	-7.14487e-10	-1.11073e-10
		0.02934	-1.25737e-10	-2.68011e-10		0.02934	-4.36804e-12	-7.14487e-10	-1.09201e-10
		0.02936	-1.26361e-10	-2.67387e-10		0.02936	-3.74404e-12	-7.14487e-10	-1.09201e-10
		0.02938	-1.26985e-10	-2.67387e-10		0.02938	-4.36804e-12	-7.16359e-10	-1.08577e-10
		0.0294	-1.28857e-10	-2.67387e-10		0.0294	-4.05604e-12	-7.17607e-10	-1.07329e-10
		0.02942	-1.30417e-10	-2.68011e-10		0.02942	-3.43203e-12	-7.17607e-10	-1.10449e-10
		0.02944	-1.31977e-10	-2.69883e-10		0.02944	-3.12003e-12	-7.18231e-10	-1.11073e-10
		0.02946	-1.32913e-10	-2.72379e-10		0.02946	-2.80803e-12	-7.20103e-10	-1.12321e-10
		0.02948	-1.31977e-10	-2.73627e-10		0.02948	-3.12003e-12	-7.20727e-10	-1.13569e-10
		0.0295	-1.31977e-10	-2.74251e-10		0.0295	-4.68004e-12	-7.21351e-10	-1.14817e-10
		0.02952	-1.32289e-10	-2.72691e-10		0.02952	-4.36804e-12	-7.23847e-10	-1.15441e-10
		0.02954	-1.34161e-10	-2.71443e-10		0.02954	-5.61605e-12	-7.25095e-10	-1.16689e-10
		0.02956	-1.36345e-10	-2.68635e-10		0.02956	-5.61605e-12	-7.26967e-10	-1.16065e-10
		0.02958	-1.37281e-10	-2.6645e-10		0.02958	-4.68004e-12	-7.30087e-10	-1.16065e-10
		0.0296	-1.38217e-10	-2.65514e-10		0.0296	-4.05604e-12	-7.27591e-10	-1.14817e-10
		0.02962	-1.37281e-10	-2.65514e-10		0.02962	-3.74404e-12	-7.26343e-10	-1.14817e-10
		0.02964	-1.36657e-10	-2.65514e-10		0.02964	-2.80803e-12	-7.25095e-10	-1.14193e-10
		0.02966	-1.34161e-10	-2.6489e-10		0.02966	-1.87202e-12	-7.22599e-10	-1.14193e-10
		0.02968	-1.32289e-10	-2.64578e-10		0.02968	-3.12003e-12	-7.18855e-10	-1.14817e-10
		0.0297	-1.31977e-10	-2.63642e-10		0.0297	-4.36804e-12	-7.18855e-10	-1.14193e-10
		0.02972	-1.30417e-10	-2.6177e-10		0.02972	-4.05604e-12	-7.17607e-10	-1.16065e-10
		0.02974	-1.29481e-10	-2.60834e-10		0.02974	-3.74404e-12	-7.17607e-10	-1.16065e-10
		0.02976	-1.29481e-10	-2.60834e-10		0.02976	-3.43203e-12	-7.17607e-10	-1.15441e-10
		0.02978	-1.28857e-10	-2.60834e-10		0.02978	-3.74404e-12	-7.17607e-10	-1.16065e-10
		0.0298	-1.28233e-10	-2.62082e-10		0.0298	-3.74404e-12	-7.17607e-10	-1.15441e-10
		0.02982	-1.28545e-10	-2.6333e-10		0.02982	-4.99205e-12	-7.18231e-10	-1.14193e-10
		0.02984	-1.28857e-10	-2.6333e-10		0.02984	-5.92806e-12	-7.18231e-10	-1.15441e-10
		0.02986	-1.30417e-10	-2.63018e-10		0.02986	-6.24006e-12	-7.18231e-10	-1.16689e-10
		0.02988	-1.32601e-10	-2.62082e-10		0.02988	-7.48807e-12	-7.19479e-10	-1.16689e-10
		0.0299	-1.34785e-10	-2.60522e-10		0.0299	-6.24006e-12	-7.20727e-10	-1.17937e-10
		0.02992	-1.35409e-10	-2.61458e-10		0.02992	-4.36804e-12	-7.20103e-10	-1.16065e-10
		0.02994	-1.34785e-10	-2.63642e-10		0.02994	-4.36804e-12	-7.18231e-10	-1.16689e-10
		0.02996	-1.34473e-10	-2.6489e-10		0.02996	-3.43203e-12	-7.17607e-10	-1.16065e-10
		0.02998	-1.32289e-10	-2.65826e-10		0.02998	-3.12003e-12	-7.16359e-10	-1.15441e-10
		0.03	-1.30729e-10	-2.66138e-10		0.03	-4.05604e-12	-7.15735e-10	-1.15441e-10
		0.03002	-1.29169e-10	-2.65514e-10		0.03002	-4.36804e-12	-7.13863e-10	-1.15441e-10
		0.03004	-1.28545e-10	-2.65202e-10		0.03004	-4.36804e-12	-7.16359e-10	-1.16065e-10
		0.03006	-1.29793e-10	-2.65826e-10		0.03006	-3.12003e-12	-7.16359e-10	-1.14817e-10
		0.03008	-1.31041e-10	-2.65826e-10		0.03008	-1.87202e-12	-7.20727e-10	-1.17313e-10
		0.0301	-1.31665e-10	-2.67387e-10		0.0301	-6.24006e-13	-7.22599e-10	-1.15441e-10
		0.03012	-1.31665e-10	-2.68323e-10		0.03012	-1.24801e-12	-7.23847e-10	-1.14193e-10
		0.03014	-1.31353e-10	-2.69883e-10		0.03014	-2.18402e-12	-7.25095e-10	-1.13569e-10
		0.03016	-1.31041e-10	-2.70507e-10		0.03016	-3.43203e-12	-7.25719e-10	-1.14193e-10
		0.03018	-1.31977e-10	-2.71443e-10		0.03018	-4.99205e-12	-7.24471e-10	-1.12321e-10
		0.0302	-1.33537e-10	-2.70507e-10		0.0302	-4.99205e-12	-7.23223e-10	-1.12945e-10
		0.03022	-1.35721e-10	-2.70195e-10		0.03022	-5.30405e-12	-7.22599e-10	-1.12321e-10
		0.03024	-1.37593e-10	-2.69259e-10		0.03024	-3.74404e-12	-7.24471e-10	-1.14817e-10
		0.03026	-1.39153e-10	-2.69259e-10		0.03026	-2.80803e-12	-7.22599e-10	-1.12945e-10
		0.03028	-1.40401e-10	-2.69883e-10		0.03028	-1.87202e-12	-7.22599e-10	-1.09825e-10
		0.0303	-1.39777e-10	-2.71755e-10		0.0303	-2.18402e-12	-7.23223e-10	-1.08577e-10
		0.03032	-1.38841e-10	-2.72067e-10		0.03032	-2.18402e-12	-7.22599e-10	-1.09825e-10
		0.03034	-1.37281e-10	-2.72067e-10		0.03034	-2.49602e-12	-7.23847e-10	-1.09825e-10
		0.03036	-1.34785e-10	-2.70819e-10		0.03036	-2.49602e-12	-7.25719e-10	-1.12321e-10
		0.03038	-1.34785e-10	-2.70195e-10		0.03038	-2.80803e-12	-7.25719e-10	-1.12321e-10
		0.0304	-1.33849e-10	-2.69883e-10		0.0304	-2.18402e-12	-7.23847e-10	-1.14193e-10
		0.03042	-1.33225e-10	-2.69883e-10		0.03042	-2.18402e-12	-7.23847e-10	-1.14193e-10
		0.03044	-1.32913e-10	-2.70195e-10		0.03044	-3.12003e-12	-7.21975e-10	-1.12321e-10
		0.03046	-1.30729e-10	-2.72691e-10		0.03046	-4.99205e-12	-7.20727e-10	-1.12321e-10
		0.03048	-1.29169e-10	-2.73939e-10		0.03048	-6.86406e-12	-7.20727e-10	-1.11697e-10
		0.0305	-1.29169e-10	-2.76123e-10		0.0305	-7.80007e-12	-7.21975e-10	-1.11697e-10
		0.03052	-1.28233e-10	-2.78307e-10		0.03052	-8.42408e-12	-7.20727e-10	-1.14193e-10
		0.03054	-1.28545e-10	-2.78619e-10		0.03054	-7.17607e-12	-7.23223e-10	-1.14817e-10
		0.03056	-1.29169e-10	-2.78619e-10		0.03056	-5.61605e-12	-7.23223e-10	-1.17937e-10
		0.03058	-1.29793e-10	-2.77683e-10		0.03058	-3.74404e-12	-7.21351e-10	-1.19185e-10
		0.0306	-1.29481e-10	-2.76747e-10		0.0306	-9.36009e-13	-7.19479e-10	-1.17313e-10
		0.03062	-1.28233e-10	-2.76435e-10		0.03062	6.24006e-13	-7.17607e-10	-1.17313e-10
		0.03064	-1.27609e-10	-2.76435e-10		0.03064	0	-7.16359e-10	-1.14193e-10
		0.03066	-1.26361e-10	-2.76747e-10		0.03066	-6.24006e-13	-7.11991e-10	-1.12321e-10
		0.03068	-1.25737e-10	-2.76747e-10		0.03068	-3.12003e-12	-7.11367e-10	-1.11073e-10
		0.0307	-1.26361e-10	-2.76747e-10		0.0307	-3.43203e-12	-7.10743e-10	-1.10449e-10
		0.03072	-1.26985e-10	-2.75499e-10		0.03072	-3.12003e-12	-7.14487e-10	-1.10449e-10
		0.03074	-1.28545e-10	-2.74875e-10		0.03074	-3.12003e-12	-7.15735e-10	-1.11073e-10
		0.03076	-1.29169e-10	-2.74251e-10		0.03076	-2.18402e-12	-7.17607e-10	-1.11073e-10
		0.03078	-1.29793e-10	-2.73939e-10		0.03078	-3.12003e-12	-7.18231e-10	-1.12321e-10
		0.0308	-1.30105e-10	-2.72691e-10		0.0308	-3.12003e-12	-7.18855e-10	-1.12945e-10
		0.03082	-1.30729e-10	-2.73315e-10		0.03082	-2.49602e-12	-7.18855e-10	-1.13569e-10
		0.03084	-1.32913e-10	-2.72067e-10		0.03084	-2.49602e-12	-7.20727e-10	-1.13569e-10
		0.03086	-1.34785e-10	-2.71443e-10		0.03086	-1.87202e-12	-7.19479e-10	-1.14817e-10
		0.03088	-1.36345e-10	-2.71443e-10		0.03088	-1.56001e-12	-7.18231e-10	-1.15441e-10
		0.0309	-1.37905e-10	-2.72067e-10		0.0309	-1.56001e-12	-7.18231e-10	-1.16065e-10
		0.03092	-1.37281e-10	-2.73315e-10		0.03092	-2.80803e-12	-7.17607e-10	-1.15441e-10
		0.03094	-1.36969e-10	-2.74563e-10		0.03094	-3.43203e-12	-7.18855e-10	-1.15441e-10
		0.03096	-1.35721e-10	-2.74563e-10		0.03096	-4.05604e-12	-7.17607e-10	-1.13569e-10
		0.03098	-1.35097e-10	-2.73939e-10		0.03098	-4.99205e-12	-7.16359e-10	-1.12945e-10
		0.031	-1.33225e-10	-2.72691e-10		0.031	-5.30405e-12	-7.16359e-10	-1.10449e-10
		0.03102	-1.32289e-10	-2.71755e-10		0.03102	-5.30405e-12	-7.16983e-10	-1.12321e-10
		0.03104	-1.31977e-10	-2.70819e-10		0.03104	-5.61605e-12	-7.17607e-10	-1.12945e-10
		0.03106	-1.31665e-10	-2.69259e-10		0.03106	-5.92806e-12	-7.18855e-10	-1.14193e-10
		0.03108	-1.31665e-10	-2.69883e-10		0.03108	-5.61605e-12	-7.20727e-10	-1.14817e-10
		0.0311	-1.33225e-10	-2.70195e-10		0.0311	-4.68004e-12	-7.21975e-10	-1.14193e-10
		0.03112	-1.33537e-10	-2.73003e-10		0.03112	-4.99205e-12	-7.20727e-10	-1.12945e-10
		0.03114	-1.34473e-10	-2.74251e-10		0.03114	-5.61605e-12	-7.20727e-10	-1.11073e-10
		0.03116	-1.34785e-10	-2.73939e-10		0.03116	-4.99205e-12	-7.20727e-10	-1.11073e-10
		0.03118	-1.35721e-10	-2.73003e-10		0.03118	-4.99205e-12	-7.18231e-10	-1.09201e-10
		0.0312	-1.35097e-10	-2.70507e-10		0.0312	-4.99205e-12	-7.15735e-10	-1.11073e-10
		0.03122	-1.35721e-10	-2.67075e-10		0.03122	-4.99205e-12	-7.15111e-10	-1.12321e-10
		0.03124	-1.35721e-10	-2.64578e-10		0.03124	-5.30405e-12	-7.17607e-10	-1.14817e-10
		0.03126	-1.36033e-10	-2.63954e-10		0.03126	-4.99205e-12	-7.16983e-10	-1.14193e-10
		0.03128	-1.35097e-10	-2.64266e-10		0.03128	-6.24006e-12	-7.19479e-10	-1.16689e-10
		0.0313	-1.33849e-10	-2.66138e-10		0.0313	-5.61605e-12	-7.20727e-10	-1.16065e-10
		0.03132	-1.32289e-10	-2.67699e-10		0.03132	-5.30405e-12	-7.20727e-10	-1.16689e-10
		0.03134	-1.30105e-10	-2.69571e-10		0.03134	-3.12003e-12	-7.19479e-10	-1.15441e-10
		0.03136	-1.29169e-10	-2.71131e-10		0.03136	-2.80803e-12	-7.18855e-10	-1.16065e-10
		0.03138	-1.30417e-10	-2.71443e-10		0.03138	-1.56001e-12	-7.20103e-10	-1.15441e-10
		0.0314	-1.31665e-10	-2.70507e-10		0.0314	-1.87202e-12	-7.20727e-10	-1.14193e-10
		0.03142	-1.32601e-10	-2.71443e-10		0.03142	-2.18402e-12	-7.21351e-10	-1.11697e-10
		0.03144	-1.32289e-10	-2.71131e-10		0.03144	-2.18402e-12	-7.21351e-10	-1.13569e-10
		0.03146	-1.33537e-10	-2.70819e-10		0.03146	-3.74404e-12	-7.20103e-10	-1.14193e-10
		0.03148	-1.32601e-10	-2.71443e-10		0.03148	-4.99205e-12	-7.19479e-10	-1.14193e-10
		0.0315	-1.31665e-10	-2.71443e-10		0.0315	-4.99205e-12	-7.18231e-10	-1.14193e-10
		0.03152	-1.31665e-10	-2.71443e-10		0.03152	-6.24006e-12	-7.17607e-10	-1.16689e-10
		0.03154	-1.31665e-10	-2.72691e-10		0.03154	-5.92806e-12	-7.17607e-10	-1.14817e-10
		0.03156	-1.33537e-10	-2.73939e-10		0.03156	-5.92806e-12	-7.18231e-10	-1.14193e-10
		0.03158	-1.35097e-10	-2.75187e-10		0.03158	-4.36804e-12	-7.19479e-10	-1.12945e-10
		0.0316	-1.36033e-10	-2.75811e-10		0.0316	-2.49602e-12	-7.19479e-10	-1.13569e-10
		0.03162	-1.36657e-10	-2.76747e-10		0.03162	-9.36009e-13	-7.19479e-10	-1.11697e-10
		0.03164	-1.36033e-10	-2.76435e-10		0.03164	0	-7.20103e-10	-1.12321e-10
		0.03166	-1.35409e-10	-2.77059e-10		0.03166	-9.36009e-13	-7.20103e-10	-1.12321e-10
		0.03168	-1.34473e-10	-2.77059e-10		0.03168	-1.56001e-12	-7.18855e-10	-1.12321e-10
		0.0317	-1.32913e-10	-2.76747e-10		0.0317	-3.43203e-12	-7.18231e-10	-1.12945e-10
		0.03172	-1.31665e-10	-2.76435e-10		0.03172	-4.99205e-12	-7.20103e-10	-1.13569e-10
		0.03174	-1.31041e-10	-2.75811e-10		0.03174	-6.24006e-12	-7.22599e-10	-1.15441e-10
		0.03176	-1.30729e-10	-2.75499e-10		0.03176	-7.17607e-12	-7.23847e-10	-1.15441e-10
		0.03178	-1.30729e-10	-2.75811e-10		0.03178	-7.80007e-12	-7.25095e-10	-1.14817e-10
		0.0318	-1.30729e-10	-2.77059e-10		0.0318	-7.80007e-12	-7.25095e-10	-1.15441e-10
		0.03182	-1.31665e-10	-2.77371e-10		0.03182	-8.42408e-12	-7.24471e-10	-1.12945e-10
		0.03184	-1.32289e-10	-2.78619e-10		0.03184	-7.48807e-12	-7.23847e-10	-1.12321e-10
		0.03186	-1.33849e-10	-2.79867e-10		0.03186	-6.86406e-12	-7.22599e-10	-1.11697e-10
		0.03188	-1.32601e-10	-2.80179e-10		0.03188	-5.30405e-12	-7.20727e-10	-1.12945e-10
		0.0319	-1.33849e-10	-2.80491e-10		0.0319	-4.68004e-12	-7.20103e-10	-1.12321e-10
		0.03192	-1.34161e-10	-2.80491e-10		0.03192	-4.68004e-12	-7.16983e-10	-1.14817e-10
		0.03194	-1.33849e-10	-2.80179e-10		0.03194	-4.36804e-12	-7.16359e-10	-1.12945e-10
		0.03196	-1.33849e-10	-2.79243e-10		0.03196	-4.36804e-12	-7.15735e-10	-1.16065e-10
		0.03198	-1.34785e-10	-2.78307e-10		0.03198	-4.36804e-12	-7.16359e-10	-1.14193e-10
		0.032	-1.35097e-10	-2.76435e-10		0.032	-5.30405e-12	-7.19479e-10	-1.14817e-10
		0.03202	-1.37281e-10	-2.74563e-10		0.03202	-6.24006e-12	-7.21975e-10	-1.14817e-10
		0.03204	-1.38841e-10	-2.73003e-10		0.03204	-6.86406e-12	-7.21975e-10	-1.16065e-10
		0.03206	-1.40089e-10	-2.72067e-10		0.03206	-6.86406e-12	-7.21975e-10	-1.16065e-10
		0.03208	-1.39465e-10	-2.72067e-10		0.03208	-6.86406e-12	-7.20103e-10	-1.16065e-10
		0.0321	-1.38841e-10	-2.71443e-10		0.0321	-5.92806e-12	-7.18231e-10	-1.14193e-10
		0.03212	-1.37593e-10	-2.70819e-10		0.03212	-5.30405e-12	-7.15111e-10	-1.14817e-10
		0.03214	-1.36345e-10	-2.70195e-10		0.03214	-5.61605e-12	-7.13239e-10	-1.16065e-10
		0.03216	-1.35409e-10	-2.69883e-10		0.03216	-5.61605e-12	-7.11367e-10	-1.17937e-10
		0.03218	-1.35409e-10	-2.69259e-10		0.03218	-5.61605e-12	-7.11991e-10	-1.18561e-10
		0.0322	-1.35097e-10	-2.67387e-10		0.0322	-5.30405e-12	-7.13239e-10	-1.19185e-10
		0.03222	-1.35721e-10	-2.67387e-10		0.03222	-6.86406e-12	-7.14487e-10	-1.18561e-10
		0.03224	-1.36033e-10	-2.67387e-10		0.03224	-7.17607e-12	-7.16983e-10	-1.19185e-10
		0.03226	-1.36657e-10	-2.68011e-10		0.03226	-7.48807e-12	-7.18231e-10	-1.18561e-10
		0.03228	-1.36345e-10	-2.70507e-10		0.03228	-7.80007e-12	-7.19479e-10	-1.17937e-10
		0.0323	-1.34161e-10	-2.72379e-10		0.0323	-6.86406e-12	-7.21975e-10	-1.18561e-10
		0.03232	-1.32601e-10	-2.73627e-10		0.03232	-6.24006e-12	-7.22599e-10	-1.17313e-10
		0.03234	-1.31353e-10	-2.75499e-10		0.03234	-5.61605e-12	-7.21975e-10	-1.14817e-10
		0.03236	-1.30417e-10	-2.76123e-10		0.03236	-5.61605e-12	-7.21351e-10	-1.13569e-10
		0.03238	-1.31665e-10	-2.75499e-10		0.03238	-5.30405e-12	-7.23223e-10	-1.13569e-10
		0.0324	-1.32601e-10	-2.75499e-10		0.0324	-4.99205e-12	-7.21975e-10	-1.13569e-10
		0.03242	-1.33849e-10	-2.74563e-10		0.03242	-5.30405e-12	-7.21351e-10	-1.12945e-10
		0.03244	-1.34785e-10	-2.74563e-10		0.03244	-5.30405e-12	-7.21351e-10	-1.11073e-10
		0.03246	-1.34473e-10	-2.74563e-10		0.03246	-5.61605e-12	-7.20103e-10	-1.12321e-10
		0.03248	-1.34473e-10	-2.73939e-10		0.03248	-5.92806e-12	-7.17607e-10	-1.12321e-10
		0.0325	-1.33537e-10	-2.73627e-10		0.0325	-6.55206e-12	-7.16359e-10	-1.14193e-10
		0.03252	-1.33537e-10	-2.73003e-10		0.03252	-7.80007e-12	-7.17607e-10	-1.14193e-10
		0.03254	-1.35409e-10	-2.72379e-10		0.03254	-9.04808e-12	-7.16359e-10	-1.14193e-10
		0.03256	-1.36657e-10	-2.71755e-10		0.03256	-9.36009e-12	-7.15735e-10	-1.16689e-10
		0.03258	-1.37593e-10	-2.70819e-10		0.03258	-9.67209e-12	-7.15735e-10	-1.17313e-10
		0.0326	-1.37281e-10	-2.71443e-10		0.0326	-8.73608e-12	-7.15111e-10	-1.16065e-10
		0.03262	-1.34785e-10	-2.71755e-10		0.03262	-8.42408e-12	-7.15111e-10	-1.16065e-10
		0.03264	-1.33537e-10	-2.71755e-10		0.03264	-8.42408e-12	-7.13239e-10	-1.15441e-10
		0.03266	-1.32289e-10	-2.70819e-10		0.03266	-7.48807e-12	-7.15735e-10	-1.14193e-10
		0.03268	-1.31977e-10	-2.70195e-10		0.03268	-6.55206e-12	-7.15735e-10	-1.15441e-10
		0.0327	-1.33225e-10	-2.69883e-10		0.0327	-5.92806e-12	-7.16359e-10	-1.14817e-10
		0.03272	-1.34473e-10	-2.70507e-10		0.03272	-4.99205e-12	-7.16983e-10	-1.16065e-10
		0.03274	-1.36033e-10	-2.71131e-10		0.03274	-5.30405e-12	-7.19479e-10	-1.16065e-10
		0.03276	-1.36969e-10	-2.71755e-10		0.03276	-5.30405e-12	-7.21351e-10	-1.17937e-10
		0.03278	-1.36033e-10	-2.71443e-10		0.03278	-4.99205e-12	-7.23847e-10	-1.17937e-10
		0.0328	-1.34785e-10	-2.71755e-10		0.0328	-4.05604e-12	-7.22599e-10	-1.16689e-10
		0.03282	-1.33537e-10	-2.70507e-10		0.03282	-3.43203e-12	-7.21975e-10	-1.17937e-10
		0.03284	-1.33537e-10	-2.70195e-10		0.03284	-3.12003e-12	-7.19479e-10	-1.17937e-10
		0.03286	-1.33849e-10	-2.69259e-10		0.03286	-1.87202e-12	-7.17607e-10	-1.18561e-10
		0.03288	-1.35409e-10	-2.68947e-10		0.03288	-1.87202e-12	-7.16983e-10	-1.17937e-10
		0.0329	-1.36345e-10	-2.68947e-10		0.0329	-6.24006e-13	-7.18855e-10	-1.17313e-10
		0.03292	-1.36345e-10	-2.68947e-10		0.03292	-3.12003e-13	-7.18231e-10	-1.16689e-10
		0.03294	-1.36657e-10	-2.69571e-10		0.03294	-3.12003e-13	-7.18855e-10	-1.15441e-10
		0.03296	-1.36345e-10	-2.70195e-10		0.03296	0	-7.17607e-10	-1.14193e-10
		0.03298	-1.35721e-10	-2.70195e-10		0.03298	-1.24801e-12	-7.15735e-10	-1.14193e-10
		0.033	-1.36345e-10	-2.71443e-10		0.033	-3.12003e-12	-7.15111e-10	-1.11073e-10
		0.03302	-1.36969e-10	-2.72379e-10		0.03302	-2.80803e-12	-7.15735e-10	-1.12321e-10
		0.03304	-1.37281e-10	-2.73315e-10		0.03304	-2.49602e-12	-7.16359e-10	-1.11073e-10
		0.03306	-1.36969e-10	-2.73939e-10		0.03306	-1.87202e-12	-7.18231e-10	-1.16689e-10
		0.03308	-1.38529e-10	-2.73939e-10		0.03308	-1.56001e-12	-7.20103e-10	-1.15441e-10
		0.0331	-1.39153e-10	-2.73003e-10		0.0331	-9.36009e-13	-7.20103e-10	-1.17937e-10
		0.03312	-1.39153e-10	-2.73003e-10		0.03312	-1.24801e-12	-7.21351e-10	-1.16065e-10
		0.03314	-1.39465e-10	-2.71755e-10		0.03314	-2.49602e-12	-7.21975e-10	-1.18561e-10
		0.03316	-1.39153e-10	-2.70195e-10		0.03316	-3.43203e-12	-7.19479e-10	-1.19185e-10
		0.03318	-1.37281e-10	-2.69571e-10		0.03318	-3.12003e-12	-7.18231e-10	-1.21057e-10
		0.0332	-1.36657e-10	-2.67699e-10		0.0332	-3.43203e-12	-7.20103e-10	-1.22929e-10
		0.03322	-1.34785e-10	-2.67075e-10		0.03322	-4.05604e-12	-7.18855e-10	-1.22305e-10
		0.03324	-1.34785e-10	-2.66138e-10		0.03324	-3.74404e-12	-7.19479e-10	-1.22305e-10
		0.03326	-1.35409e-10	-2.6645e-10		0.03326	-3.43203e-12	-7.21351e-10	-1.21057e-10
		0.03328	-1.35721e-10	-2.66138e-10		0.03328	-4.05604e-12	-7.20103e-10	-1.17313e-10
		0.0333	-1.36033e-10	-2.6645e-10		0.0333	-5.30405e-12	-7.19479e-10	-1.16065e-10
		0.03332	-1.36345e-10	-2.67699e-10		0.03332	-5.92806e-12	-7.16359e-10	-1.12321e-10
		0.03334	-1.36033e-10	-2.68011e-10		0.03334	-7.80007e-12	-7.16983e-10	-1.12321e-10
		0.03336	-1.36033e-10	-2.68011e-10		0.03336	-8.42408e-12	-7.17607e-10	-1.12321e-10
		0.03338	-1.37593e-10	-2.68323e-10		0.03338	-7.17607e-12	-7.18231e-10	-1.14817e-10
		0.0334	-1.38217e-10	-2.68323e-10		0.0334	-5.61605e-12	-7.20727e-10	-1.16689e-10
		0.03342	-1.38841e-10	-2.67699e-10		0.03342	-3.43203e-12	-7.23223e-10	-1.17937e-10
		0.03344	-1.39777e-10	-2.66763e-10		0.03344	-2.49602e-12	-7.23847e-10	-1.17937e-10
		0.03346	-1.40089e-10	-2.65826e-10		0.03346	-3.12003e-13	-7.23847e-10	-1.16689e-10
		0.03348	-1.39465e-10	-2.6489e-10		0.03348	0	-7.23847e-10	-1.15441e-10
		0.0335	-1.38529e-10	-2.63642e-10		0.0335	-2.18402e-12	-7.21351e-10	-1.16065e-10
		0.03352	-1.37281e-10	-2.63954e-10		0.03352	-2.49602e-12	-7.19479e-10	-1.14817e-10
		0.03354	-1.37281e-10	-2.64578e-10		0.03354	-4.05604e-12	-7.17607e-10	-1.15441e-10
		0.03356	-1.37281e-10	-2.64266e-10		0.03356	-4.36804e-12	-7.17607e-10	-1.16689e-10
		0.03358	-1.36969e-10	-2.65202e-10		0.03358	-4.68004e-12	-7.18231e-10	-1.16689e-10
		0.0336	-1.37281e-10	-2.65826e-10		0.0336	-3.74404e-12	-7.16983e-10	-1.17313e-10
		0.03362	-1.38217e-10	-2.66138e-10		0.03362	-2.80803e-12	-7.16983e-10	-1.16065e-10
		0.03364	-1.38841e-10	-2.67699e-10		0.03364	-9.36009e-13	-7.15735e-10	-1.15441e-10
		0.03366	-1.38217e-10	-2.67699e-10		0.03366	-3.12003e-13	-7.16983e-10	-1.14817e-10
		0.03368	-1.38529e-10	-2.67699e-10		0.03368	-3.12003e-13	-7.16359e-10	-1.14817e-10
		0.0337	-1.38217e-10	-2.67075e-10		0.0337	-1.24801e-12	-7.16983e-10	-1.14193e-10
		0.03372	-1.37281e-10	-2.67699e-10		0.03372	-2.18402e-12	-7.18855e-10	-1.12945e-10
		0.03374	-1.36657e-10	-2.67699e-10		0.03374	-4.36804e-12	-7.18855e-10	-1.14817e-10
		0.03376	-1.36033e-10	-2.68947e-10		0.03376	-6.55206e-12	-7.17607e-10	-1.14193e-10
		0.03378	-1.35409e-10	-2.70507e-10		0.03378	-7.48807e-12	-7.18855e-10	-1.14817e-10
		0.0338	-1.34473e-10	-2.71443e-10		0.0338	-7.80007e-12	-7.18231e-10	-1.14193e-10
		0.03382	-1.34473e-10	-2.71443e-10		0.03382	-8.11208e-12	-7.18855e-10	-1.12945e-10
		0.03384	-1.35409e-10	-2.72379e-10		0.03384	-7.48807e-12	-7.20103e-10	-1.12321e-10
		0.03386	-1.36033e-10	-2.73627e-10		0.03386	-6.86406e-12	-7.20103e-10	-1.12321e-10
		0.03388	-1.36969e-10	-2.74251e-10		0.03388	-5.61605e-12	-7.19479e-10	-1.12945e-10
		0.0339	-1.36345e-10	-2.75811e-10		0.0339	-5.30405e-12	-7.18855e-10	-1.12321e-10
		0.03392	-1.35409e-10	-2.77995e-10		0.03392	-4.36804e-12	-7.16983e-10	-1.10449e-10
		0.03394	-1.35409e-10	-2.78931e-10		0.03394	-4.36804e-12	-7.15735e-10	-1.08577e-10
		0.03396	-1.35409e-10	-2.79867e-10		0.03396	-5.61605e-12	-7.15111e-10	-1.07953e-10
		0.03398	-1.35097e-10	-2.80491e-10		0.03398	-6.86406e-12	-7.15735e-10	-1.06705e-10
		0.034	-1.34785e-10	-2.79867e-10		0.034	-7.80007e-12	-7.12615e-10	-1.07329e-10
		0.03402	-1.34161e-10	-2.79243e-10		0.03402	-8.73608e-12	-7.11367e-10	-1.08577e-10
		0.03404	-1.35097e-10	-2.77995e-10		0.03404	-8.42408e-12	-7.10743e-10	-1.11073e-10
		0.03406	-1.35097e-10	-2.76123e-10		0.03406	-7.48807e-12	-7.13239e-10	-1.11697e-10
		0.03408	-1.34161e-10	-2.74875e-10		0.03408	-7.80007e-12	-7.13863e-10	-1.14193e-10
		0.0341	-1.33849e-10	-2.75187e-10		0.0341	-7.48807e-12	-7.15111e-10	-1.12321e-10
		0.03412	-1.32601e-10	-2.74563e-10		0.03412	-6.86406e-12	-7.14487e-10	-1.11073e-10
		0.03414	-1.31977e-10	-2.74875e-10		0.03414	-6.24006e-12	-7.15735e-10	-1.11697e-10
		0.03416	-1.31041e-10	-2.74875e-10		0.03416	-6.86406e-12	-7.15111e-10	-1.12321e-10
		0.03418	-1.32289e-10	-2.73939e-10		0.03418	-5.92806e-12	-7.15111e-10	-1.11073e-10
		0.0342	-1.32601e-10	-2.73003e-10		0.0342	-6.24006e-12	-7.16359e-10	-1.13569e-10
		0.03422	-1.33849e-10	-2.73003e-10		0.03422	-6.24006e-12	-7.18231e-10	-1.13569e-10
		0.03424	-1.34473e-10	-2.73627e-10		0.03424	-5.92806e-12	-7.18231e-10	-1.13569e-10
		0.03426	-1.34785e-10	-2.75187e-10		0.03426	-5.61605e-12	-7.18231e-10	-1.14817e-10
		0.03428	-1.34785e-10	-2.76435e-10		0.03428	-7.17607e-12	-7.20103e-10	-1.13569e-10
		0.0343	-1.34161e-10	-2.77371e-10		0.0343	-6.86406e-12	-7.18855e-10	-1.11697e-10
		0.03432	-1.34473e-10	-2.76435e-10		0.03432	-7.48807e-12	-7.17607e-10	-1.11697e-10
		0.03434	-1.34161e-10	-2.77683e-10		0.03434	-6.86406e-12	-7.16983e-10	-1.11697e-10
		0.03436	-1.35097e-10	-2.76747e-10		0.03436	-6.24006e-12	-7.18231e-10	-1.12321e-10
		0.03438	-1.35409e-10	-2.76123e-10		0.03438	-6.24006e-12	-7.18231e-10	-1.11073e-10
		0.0344	-1.36657e-10	-2.75499e-10		0.0344	-4.68004e-12	-7.18855e-10	-1.12321e-10
		0.03442	-1.37593e-10	-2.75811e-10		0.03442	-4.05604e-12	-7.19479e-10	-1.12321e-10
		0.03444	-1.36657e-10	-2.75187e-10		0.03444	-4.05604e-12	-7.20103e-10	-1.11697e-10
		0.03446	-1.36345e-10	-2.76747e-10		0.03446	-3.12003e-12	-7.20103e-10	-1.09825e-10
		0.03448	-1.34785e-10	-2.77059e-10		0.03448	-3.43203e-12	-7.19479e-10	-1.11073e-10
		0.0345	-1.34161e-10	-2.78931e-10		0.0345	-2.49602e-12	-7.18231e-10	-1.10449e-10
		0.03452	-1.34473e-10	-2.80179e-10		0.03452	-3.12003e-12	-7.17607e-10	-1.09825e-10
		0.03454	-1.34785e-10	-2.81739e-10		0.03454	-3.12003e-12	-7.16983e-10	-1.11697e-10
		0.03456	-1.35097e-10	-2.81427e-10		0.03456	-2.80803e-12	-7.16983e-10	-1.13569e-10
		0.03458	-1.35721e-10	-2.81115e-10		0.03458	-3.12003e-12	-7.17607e-10	-1.14817e-10
		0.0346	-1.35721e-10	-2.81115e-10		0.0346	-3.12003e-12	-7.19479e-10	-1.14817e-10
		0.03462	-1.35721e-10	-2.80803e-10		0.03462	-3.43203e-12	-7.18231e-10	-1.12945e-10
		0.03464	-1.35409e-10	-2.79555e-10		0.03464	-3.74404e-12	-7.20103e-10	-1.12321e-10
		0.03466	-1.35097e-10	-2.80491e-10		0.03466	-4.36804e-12	-7.20103e-10	-1.12321e-10
		0.03468	-1.35721e-10	-2.79867e-10		0.03468	-4.05604e-12	-7.20727e-10	-1.13569e-10
		0.0347	-1.36657e-10	-2.81115e-10		0.0347	-3.74404e-12	-7.18855e-10	-1.13569e-10
		0.03472	-1.35409e-10	-2.83299e-10		0.03472	-2.80803e-12	-7.18231e-10	-1.15441e-10
		0.03474	-1.35409e-10	-2.83611e-10		0.03474	-2.18402e-12	-7.18231e-10	-1.15441e-10
		0.03476	-1.35409e-10	-2.84859e-10		0.03476	-1.24801e-12	-7.16983e-10	-1.15441e-10
		0.03478	-1.37281e-10	-2.84547e-10		0.03478	-1.24801e-12	-7.13239e-10	-1.14817e-10
		0.0348	-1.37905e-10	-2.82675e-10		0.0348	-1.87202e-12	-7.13239e-10	-1.15441e-10
		0.03482	-1.38841e-10	-2.79243e-10		0.03482	-2.80803e-12	-7.13239e-10	-1.14817e-10
		0.03484	-1.39465e-10	-2.77371e-10		0.03484	-3.43203e-12	-7.13863e-10	-1.16065e-10
		0.03486	-1.39153e-10	-2.77059e-10		0.03486	-3.74404e-12	-7.16359e-10	-1.16065e-10
		0.03488	-1.38841e-10	-2.77683e-10		0.03488	-4.05604e-12	-7.16983e-10	-1.16689e-10
		0.0349	-1.38529e-10	-2.79243e-10		0.0349	-3.43203e-12	-7.18231e-10	-1.18561e-10
		0.03492	-1.37905e-10	-2.81739e-10		0.03492	-2.80803e-12	-7.18855e-10	-1.19185e-10
		0.03494	-1.36969e-10	-2.83611e-10		0.03494	-1.87202e-12	-7.17607e-10	-1.18561e-10
		0.03496	-1.36033e-10	-2.83299e-10		0.03496	-1.24801e-12	-7.16359e-10	-1.16689e-10
		0.03498	-1.34785e-10	-2.83299e-10		0.03498	-1.87202e-12	-7.16359e-10	-1.16689e-10
		0.035	-1.34161e-10	-2.82363e-10		0.035	-2.49602e-12	-7.14487e-10	-1.16065e-10
		0.03502	-1.33537e-10	-2.80491e-10		0.03502	-2.80803e-12	-7.15111e-10	-1.15441e-10
		0.03504	-1.33849e-10	-2.77995e-10		0.03504	-3.74404e-12	-7.14487e-10	-1.15441e-10
		0.03506	-1.34473e-10	-2.76123e-10		0.03506	-4.05604e-12	-7.15735e-10	-1.15441e-10
		0.03508	-1.35097e-10	-2.74251e-10		0.03508	-3.43203e-12	-7.16983e-10	-1.15441e-10
		0.0351	-1.35097e-10	-2.72691e-10		0.0351	-3.74404e-12	-7.17607e-10	-1.14817e-10
		0.03512	-1.33849e-10	-2.73003e-10		0.03512	-3.43203e-12	-7.18231e-10	-1.12945e-10
		0.03514	-1.33225e-10	-2.73627e-10		0.03514	-3.74404e-12	-7.18231e-10	-1.14193e-10
		0.03516	-1.32913e-10	-2.73939e-10		0.03516	-3.74404e-12	-7.17607e-10	-1.14193e-10
		0.03518	-1.32913e-10	-2.74251e-10		0.03518	-3.12003e-12	-7.16359e-10	-1.14193e-10
		0.0352	-1.32601e-10	-2.74563e-10		0.0352	-2.49602e-12	-7.15735e-10	-1.13569e-10
		0.03522	-1.33849e-10	-2.74251e-10		0.03522	-2.49602e-12	-7.18231e-10	-1.14817e-10
		0.03524	-1.32601e-10	-2.74563e-10		0.03524	-1.87202e-12	-7.18231e-10	-1.14193e-10
		0.03526	-1.31977e-10	-2.75499e-10		0.03526	-9.36009e-13	-7.19479e-10	-1.16689e-10
		0.03528	-1.31977e-10	-2.75811e-10		0.03528	-3.12003e-13	-7.19479e-10	-1.16689e-10
		0.0353	-1.32913e-10	-2.76435e-10		0.0353	1.24801e-12	-7.18231e-10	-1.17313e-10
		0.03532	-1.32913e-10	-2.76747e-10		0.03532	0	-7.18231e-10	-1.17313e-10
		0.03534	-1.34785e-10	-2.77059e-10		0.03534	-9.36009e-13	-7.16359e-10	-1.19185e-10
		0.03536	-1.36033e-10	-2.77059e-10		0.03536	-2.80803e-12	-7.15735e-10	-1.17313e-10
		0.03538	-1.37593e-10	-2.77371e-10		0.03538	-4.36804e-12	-7.16359e-10	-1.17937e-10
		0.0354	-1.38529e-10	-2.77059e-10		0.0354	-5.61605e-12	-7.18231e-10	-1.17313e-10
		0.03542	-1.38841e-10	-2.77059e-10		0.03542	-5.61605e-12	-7.18231e-10	-1.17313e-10
		0.03544	-1.38529e-10	-2.77371e-10		0.03544	-4.99205e-12	-7.19479e-10	-1.16689e-10
		0.03546	-1.38217e-10	-2.77059e-10		0.03546	-4.05604e-12	-7.18231e-10	-1.16065e-10
		0.03548	-1.38529e-10	-2.77683e-10		0.03548	-3.74404e-12	-7.18231e-10	-1.14193e-10
		0.0355	-1.38841e-10	-2.77371e-10		0.0355	-3.43203e-12	-7.16983e-10	-1.14193e-10
		0.03552	-1.40401e-10	-2.78307e-10		0.03552	-4.05604e-12	-7.16983e-10	-1.13569e-10
		0.03554	-1.42273e-10	-2.77371e-10		0.03554	-5.30405e-12	-7.17607e-10	-1.13569e-10
		0.03556	-1.43521e-10	-2.77059e-10		0.03556	-5.92806e-12	-7.18855e-10	-1.12321e-10
		0.03558	-1.43209e-10	-2.77371e-10		0.03558	-5.92806e-12	-7.20103e-10	-1.11697e-10
		0.0356	-1.41649e-10	-2.77995e-10		0.0356	-5.30405e-12	-7.19479e-10	-1.09825e-10
		0.03562	-1.39777e-10	-2.78931e-10		0.03562	-3.12003e-12	-7.22599e-10	-1.10449e-10
		0.03564	-1.38217e-10	-2.79867e-10		0.03564	-2.80803e-12	-7.21351e-10	-1.09825e-10
		0.03566	-1.37905e-10	-2.79243e-10		0.03566	-1.24801e-12	-7.20103e-10	-1.11697e-10
		0.03568	-1.37593e-10	-2.80491e-10		0.03568	-1.87202e-12	-7.19479e-10	-1.14193e-10
		0.0357	-1.38529e-10	-2.79867e-10		0.0357	-1.87202e-12	-7.20103e-10	-1.16065e-10
		0.03572	-1.39465e-10	-2.81115e-10		0.03572	-2.80803e-12	-7.20103e-10	-1.18561e-10
		0.03574	-1.39465e-10	-2.81115e-10		0.03574	-3.74404e-12	-7.20727e-10	-1.18561e-10
		0.03576	-1.39777e-10	-2.82987e-10		0.03576	-4.68004e-12	-7.20103e-10	-1.16689e-10
		0.03578	-1.40401e-10	-2.83611e-10		0.03578	-5.30405e-12	-7.20103e-10	-1.16065e-10
		0.0358	-1.40089e-10	-2.83923e-10		0.0358	-3.74404e-12	-7.23223e-10	-1.14193e-10
		0.03582	-1.40089e-10	-2.83611e-10		0.03582	-3.43203e-12	-7.23847e-10	-1.12321e-10
		0.03584	-1.40089e-10	-2.83611e-10		0.03584	-1.87202e-12	-7.25095e-10	-1.11073e-10
		0.03586	-1.40089e-10	-2.82987e-10		0.03586	-1.87202e-12	-7.23847e-10	-1.11073e-10
		0.03588	-1.39153e-10	-2.82363e-10		0.03588	-2.18402e-12	-7.25719e-10	-1.11697e-10
		0.0359	-1.37593e-10	-2.81739e-10		0.0359	-2.80803e-12	-7.25719e-10	-1.14193e-10
		0.03592	-1.36657e-10	-2.81739e-10		0.03592	-3.74404e-12	-7.25095e-10	-1.15441e-10
		0.03594	-1.33849e-10	-2.83299e-10		0.03594	-5.30405e-12	-7.25719e-10	-1.15441e-10
		0.03596	-1.32601e-10	-2.84547e-10		0.03596	-6.24006e-12	-7.25095e-10	-1.14817e-10
		0.03598	-1.31977e-10	-2.84547e-10		0.03598	-6.24006e-12	-7.24471e-10	-1.16689e-10
		0.036	-1.30729e-10	-2.84859e-10		0.036	-6.86406e-12	-7.23223e-10	-1.14817e-10
		0.03602	-1.32289e-10	-2.83299e-10		0.03602	-6.55206e-12	-7.23223e-10	-1.16065e-10
		0.03604	-1.32289e-10	-2.82675e-10		0.03604	-5.92806e-12	-7.21351e-10	-1.16065e-10
		0.03606	-1.34161e-10	-2.81427e-10		0.03606	-4.99205e-12	-7.22599e-10	-1.17937e-10
		0.03608	-1.35097e-10	-2.80491e-10		0.03608	-3.12003e-12	-7.23847e-10	-1.17937e-10
		0.0361	-1.36345e-10	-2.79555e-10		0.0361	-2.18402e-12	-7.23223e-10	-1.18561e-10
		0.03612	-1.36657e-10	-2.79243e-10		0.03612	-1.24801e-12	-7.20103e-10	-1.18561e-10
		0.03614	-1.36969e-10	-2.79243e-10		0.03614	-9.36009e-13	-7.20727e-10	-1.17937e-10
		0.03616	-1.36969e-10	-2.78307e-10		0.03616	-9.36009e-13	-7.20103e-10	-1.17313e-10
		0.03618	-1.36657e-10	-2.76747e-10		0.03618	-9.36009e-13	-7.20727e-10	-1.17313e-10
		0.0362	-1.35721e-10	-2.74875e-10		0.0362	-9.36009e-13	-7.20103e-10	-1.16065e-10
		0.03622	-1.35097e-10	-2.73627e-10		0.03622	-1.24801e-12	-7.22599e-10	-1.15441e-10
		0.03624	-1.34161e-10	-2.73003e-10		0.03624	-1.24801e-12	-7.22599e-10	-1.15441e-10
		0.03626	-1.32913e-10	-2.74251e-10		0.03626	-1.56001e-12	-7.23847e-10	-1.15441e-10
		0.03628	-1.31977e-10	-2.76435e-10		0.03628	-6.24006e-13	-7.23223e-10	-1.16689e-10
		0.0363	-1.31977e-10	-2.78931e-10		0.0363	-6.24006e-13	-7.23223e-10	-1.15441e-10
		0.03632	-1.32913e-10	-2.80179e-10		0.03632	0	-7.20727e-10	-1.15441e-10
		0.03634	-1.34161e-10	-2.80491e-10		0.03634	3.12003e-13	-7.21351e-10	-1.17313e-10
		0.03636	-1.37281e-10	-2.79867e-10		0.03636	3.12003e-13	-7.20727e-10	-1.17313e-10
		0.03638	-1.39465e-10	-2.78307e-10		0.03638	0	-7.20727e-10	-1.16689e-10
		0.0364	-1.40713e-10	-2.76435e-10		0.0364	-1.56001e-12	-7.20727e-10	-1.16065e-10
		0.03642	-1.40713e-10	-2.75811e-10		0.03642	-3.12003e-12	-7.23223e-10	-1.14817e-10
		0.03644	-1.39153e-10	-2.76435e-10		0.03644	-3.43203e-12	-7.22599e-10	-1.13569e-10
		0.03646	-1.38217e-10	-2.77371e-10		0.03646	-2.80803e-12	-7.22599e-10	-1.12321e-10
		0.03648	-1.37281e-10	-2.79243e-10		0.03648	-3.12003e-12	-7.21975e-10	-1.11073e-10
		0.0365	-1.37905e-10	-2.79867e-10		0.0365	-2.80803e-12	-7.20727e-10	-1.11697e-10
		0.03652	-1.37593e-10	-2.80491e-10		0.03652	-3.43203e-12	-7.20727e-10	-1.12945e-10
		0.03654	-1.38841e-10	-2.82987e-10		0.03654	-4.68004e-12	-7.20103e-10	-1.13569e-10
		0.03656	-1.40089e-10	-2.83611e-10		0.03656	-5.61605e-12	-7.18855e-10	-1.14193e-10
		0.03658	-1.40713e-10	-2.84235e-10		0.03658	-5.61605e-12	-7.19479e-10	-1.14193e-10
		0.0366	-1.41649e-10	-2.83923e-10		0.0366	-6.55206e-12	-7.20103e-10	-1.14817e-10
		0.03662	-1.42897e-10	-2.83611e-10		0.03662	-6.24006e-12	-7.20103e-10	-1.12321e-10
		0.03664	-1.43209e-10	-2.82987e-10		0.03664	-7.17607e-12	-7.18855e-10	-1.11073e-10
		0.03666	-1.43521e-10	-2.81115e-10		0.03666	-5.30405e-12	-7.19479e-10	-1.09825e-10
		0.03668	-1.42897e-10	-2.79243e-10		0.03668	-5.61605e-12	-7.18855e-10	-1.10449e-10
		0.0367	-1.43521e-10	-2.78307e-10		0.0367	-5.30405e-12	-7.20103e-10	-1.11697e-10
		0.03672	-1.41961e-10	-2.79555e-10		0.03672	-3.43203e-12	-7.20103e-10	-1.13569e-10
		0.03674	-1.41025e-10	-2.81115e-10		0.03674	-2.18402e-12	-7.20103e-10	-1.14193e-10
		0.03676	-1.40401e-10	-2.82987e-10		0.03676	-1.87202e-12	-7.20727e-10	-1.13569e-10
		0.03678	-1.39153e-10	-2.84235e-10		0.03678	-1.24801e-12	-7.23223e-10	-1.15441e-10
		0.0368	-1.38529e-10	-2.84235e-10		0.0368	-6.24006e-13	-7.23223e-10	-1.14817e-10
		0.03682	-1.38529e-10	-2.82987e-10		0.03682	-6.24006e-13	-7.23223e-10	-1.16065e-10
		0.03684	-1.39153e-10	-2.82051e-10		0.03684	-6.24006e-13	-7.24471e-10	-1.16065e-10
		0.03686	-1.40401e-10	-2.79555e-10		0.03686	-1.24801e-12	-7.24471e-10	-1.17937e-10
		0.03688	-1.42273e-10	-2.77371e-10		0.03688	-2.18402e-12	-7.25719e-10	-1.16689e-10
		0.0369	-1.43209e-10	-2.76435e-10		0.0369	-3.43203e-12	-7.25095e-10	-1.17313e-10
		0.03692	-1.43833e-10	-2.75499e-10		0.03692	-3.43203e-12	-7.26343e-10	-1.16065e-10
		0.03694	-1.43521e-10	-2.75187e-10		0.03694	-3.43203e-12	-7.25719e-10	-1.14193e-10
		0.03696	-1.42585e-10	-2.74875e-10		0.03696	-1.87202e-12	-7.25095e-10	-1.13569e-10
		0.03698	-1.42585e-10	-2.75499e-10		0.03698	-2.18402e-12	-7.22599e-10	-1.11073e-10
		0.037	-1.41961e-10	-2.75187e-10		0.037	-9.36009e-13	-7.21975e-10	-1.12945e-10
		0.03702	-1.41025e-10	-2.74563e-10		0.03702	-1.56001e-12	-7.20103e-10	-1.12321e-10
		0.03704	-1.40713e-10	-2.73315e-10		0.03704	-1.87202e-12	-7.20103e-10	-1.11697e-10
		0.03706	-1.40089e-10	-2.73315e-10		0.03706	-2.80803e-12	-7.20727e-10	-1.11073e-10
		0.03708	-1.38529e-10	-2.73003e-10		0.03708	-3.43203e-12	-7.20727e-10	-1.11073e-10
		0.0371	-1.36969e-10	-2.73315e-10		0.0371	-3.12003e-12	-7.19479e-10	-1.11073e-10
		0.03712	-1.35409e-10	-2.74251e-10		0.03712	-2.80803e-12	-7.18855e-10	-1.13569e-10
		0.03714	-1.35097e-10	-2.75499e-10		0.03714	-2.18402e-12	-7.19479e-10	-1.11697e-10
		0.03716	-1.35409e-10	-2.76435e-10		0.03716	-9.36009e-13	-7.20727e-10	-1.13569e-10
		0.03718	-1.36033e-10	-2.77683e-10		0.03718	-9.36009e-13	-7.20103e-10	-1.13569e-10
		0.0372	-1.36969e-10	-2.77683e-10		0.0372	-1.24801e-12	-7.19479e-10	-1.13569e-10
		0.03722	-1.37905e-10	-2.78307e-10		0.03722	-1.56001e-12	-7.18855e-10	-1.12321e-10
		0.03724	-1.38529e-10	-2.79243e-10		0.03724	-1.87202e-12	-7.18855e-10	-1.11073e-10
		0.03726	-1.39153e-10	-2.79555e-10		0.03726	-1.56001e-12	-7.19479e-10	-1.12945e-10
		0.03728	-1.38217e-10	-2.80491e-10		0.03728	-2.80803e-12	-7.18855e-10	-1.11697e-10
		0.0373	-1.37905e-10	-2.80179e-10		0.0373	-3.12003e-12	-7.18231e-10	-1.13569e-10
		0.03732	-1.37905e-10	-2.79243e-10		0.03732	-4.05604e-12	-7.18231e-10	-1.14817e-10
		0.03734	-1.36657e-10	-2.79555e-10		0.03734	-3.43203e-12	-7.19479e-10	-1.14193e-10
		0.03736	-1.37593e-10	-2.79243e-10		0.03736	-2.18402e-12	-7.21351e-10	-1.14817e-10
		0.03738	-1.36969e-10	-2.79243e-10		0.03738	-9.36009e-13	-7.22599e-10	-1.14193e-10
		0.0374	-1.36969e-10	-2.80491e-10		0.0374	-6.24006e-13	-7.21975e-10	-1.11697e-10
		0.03742	-1.36969e-10	-2.81739e-10		0.03742	-1.24801e-12	-7.21351e-10	-1.10449e-10
		0.03744	-1.36657e-10	-2.82987e-10		0.03744	-1.87202e-12	-7.20103e-10	-1.12945e-10
		0.03746	-1.35409e-10	-2.83299e-10		0.03746	-2.18402e-12	-7.19479e-10	-1.12321e-10
		0.03748	-1.35097e-10	-2.82363e-10		0.03748	-2.18402e-12	-7.18855e-10	-1.13569e-10
		0.0375	-1.35721e-10	-2.82051e-10		0.0375	-3.74404e-12	-7.19479e-10	-1.14193e-10
		0.03752	-1.36969e-10	-2.79867e-10		0.03752	-3.12003e-12	-7.18231e-10	-1.16065e-10
		0.03754	-1.36969e-10	-2.79555e-10		0.03754	-4.99205e-12	-7.19479e-10	-1.16065e-10
		0.03756	-1.37593e-10	-2.78931e-10		0.03756	-6.24006e-12	-7.18231e-10	-1.17937e-10
		0.03758	-1.37593e-10	-2.78931e-10		0.03758	-7.80007e-12	-7.18855e-10	-1.18561e-10
		0.0376	-1.37905e-10	-2.79555e-10		0.0376	-6.86406e-12	-7.19479e-10	-1.17937e-10
		0.03762	-1.36657e-10	-2.79867e-10		0.03762	-6.24006e-12	-7.19479e-10	-1.17313e-10
		0.03764	-1.36345e-10	-2.78307e-10		0.03764	-5.30405e-12	-7.19479e-10	-1.14817e-10
		0.03766	-1.36033e-10	-2.77059e-10		0.03766	-4.68004e-12	-7.20103e-10	-1.15441e-10
		0.03768	-1.35721e-10	-2.75811e-10		0.03768	-4.68004e-12	-7.19479e-10	-1.15441e-10
		0.0377	-1.35097e-10	-2.75811e-10		0.0377	-4.99205e-12	-7.18855e-10	-1.15441e-10
		0.03772	-1.34161e-10	-2.76435e-10		0.03772	-6.24006e-12	-7.20727e-10	-1.14817e-10
		0.03774	-1.33849e-10	-2.77371e-10		0.03774	-5.61605e-12	-7.20103e-10	-1.16065e-10
		0.03776	-1.34161e-10	-2.80179e-10		0.03776	-6.86406e-12	-7.20727e-10	-1.14817e-10
		0.03778	-1.34785e-10	-2.81115e-10		0.03778	-6.86406e-12	-7.19479e-10	-1.14193e-10
		0.0378	-1.35097e-10	-2.83611e-10		0.0378	-5.92806e-12	-7.18855e-10	-1.14193e-10
		0.03782	-1.35721e-10	-2.83923e-10		0.03782	-4.99205e-12	-7.17607e-10	-1.14817e-10
		0.03784	-1.35721e-10	-2.83299e-10		0.03784	-4.36804e-12	-7.16983e-10	-1.12945e-10
		0.03786	-1.36657e-10	-2.81739e-10		0.03786	-4.99205e-12	-7.19479e-10	-1.15441e-10
		0.03788	-1.37593e-10	-2.81739e-10		0.03788	-6.86406e-12	-7.20103e-10	-1.14817e-10
		0.0379	-1.37281e-10	-2.82051e-10		0.0379	-9.04808e-12	-7.20727e-10	-1.13569e-10
		0.03792	-1.36969e-10	-2.82051e-10		0.03792	-1.09201e-11	-7.20727e-10	-1.11697e-10
		0.03794	-1.35097e-10	-2.82363e-10		0.03794	-1.37281e-11	-7.20727e-10	-1.09825e-10
		0.03796	-1.33849e-10	-2.82987e-10		0.03796	-1.56001e-11	-7.18855e-10	-1.09201e-10
		0.03798	-1.32289e-10	-2.83299e-10		0.03798	-1.68482e-11	-7.19479e-10	-1.06705e-10
		0.038	-1.33225e-10	-2.82987e-10		0.038	-1.87202e-11	-7.20103e-10	-1.08577e-10
		0.03802	-1.33849e-10	-2.82051e-10		0.03802	-2.02802e-11	-7.20727e-10	-1.09825e-10
		0.03804	-1.34785e-10	-2.81427e-10		0.03804	-2.12162e-11	-7.21351e-10	-1.11697e-10
		0.03806	-1.34785e-10	-2.80803e-10		0.03806	-2.18402e-11	-7.22599e-10	-1.14193e-10
		0.03808	-1.35721e-10	-2.80179e-10		0.03808	-2.30882e-11	-7.20727e-10	-1.14817e-10
		0.0381	-1.35097e-10	-2.80491e-10		0.0381	-2.40242e-11	-7.19479e-10	-1.16689e-10
		0.03812	-1.35097e-10	-2.80803e-10		0.03812	-2.37122e-11	-7.18231e-10	-1.14817e-10
		0.03814	-1.35721e-10	-2.80491e-10		0.03814	-2.34002e-11	-7.16359e-10	-1.16065e-10
		0.03816	-1.36345e-10	-2.80491e-10		0.03816	-2.21522e-11	-7.13239e-10	-1.13569e-10
		0.03818	-1.38529e-10	-2.79243e-10		0.03818	-2.15282e-11	-7.13239e-10	-1.13569e-10
		0.0382	-1.40089e-10	-2.78931e-10		0.0382	-1.99682e-11	-7.14487e-10	-1.12321e-10
		0.03822	-1.41337e-10	-2.78931e-10		0.03822	-1.90322e-11	-7.15735e-10	-1.14193e-10
		0.03824	-1.41337e-10	-2.79243e-10		0.03824	-1.77842e-11	-7.18855e-10	-1.13569e-10
		0.03826	-1.41961e-10	-2.79243e-10		0.03826	-1.65362e-11	-7.18855e-10	-1.14193e-10
		0.03828	-1.42273e-10	-2.80179e-10		0.03828	-1.49761e-11	-7.19479e-10	-1.14817e-10
		0.0383	-1.41337e-10	-2.81115e-10		0.0383	-1.37281e-11	-7.19479e-10	-1.15441e-10
		0.03832	-1.41649e-10	-2.83299e-10		0.03832	-1.24801e-11	-7.20103e-10	-1.14817e-10
		0.03834	-1.42273e-10	-2.84547e-10		0.03834	-1.27921e-11	-7.21351e-10	-1.15441e-10
		0.03836	-1.42273e-10	-2.84859e-10		0.03836	-1.31041e-11	-7.22599e-10	-1.15441e-10
		0.03838	-1.41649e-10	-2.84859e-10		0.03838	-1.37281e-11	-7.23847e-10	-1.14193e-10
		0.0384	-1.41649e-10	-2.85483e-10		0.0384	-1.37281e-11	-7.25095e-10	-1.16065e-10
		0.03842	-1.39777e-10	-2.85795e-10		0.03842	-1.24801e-11	-7.23847e-10	-1.16065e-10
		0.03844	-1.39153e-10	-2.84859e-10		0.03844	-1.24801e-11	-7.23223e-10	-1.16065e-10
		0.03846	-1.39465e-10	-2.84235e-10		0.03846	-1.12321e-11	-7.23847e-10	-1.16065e-10
		0.03848	-1.38841e-10	-2.82987e-10		0.03848	-1.02961e-11	-7.21351e-10	-1.13569e-10
		0.0385	-1.38841e-10	-2.81115e-10		0.0385	-8.73608e-12	-7.20727e-10	-1.14193e-10
		0.03852	-1.38841e-10	-2.79867e-10		0.03852	-7.80007e-12	-7.21975e-10	-1.13569e-10
		0.03854	-1.37905e-10	-2.78619e-10		0.03854	-6.86406e-12	-7.20103e-10	-1.11697e-10
		0.03856	-1.39153e-10	-2.79243e-10		0.03856	-6.86406e-12	-7.19479e-10	-1.11697e-10
		0.03858	-1.39465e-10	-2.81115e-10		0.03858	-7.48807e-12	-7.20103e-10	-1.10449e-10
		0.0386	-1.39153e-10	-2.82051e-10		0.0386	-8.11208e-12	-7.20103e-10	-1.09825e-10
		0.03862	-1.39465e-10	-2.84235e-10		0.03862	-8.11208e-12	-7.20727e-10	-1.10449e-10
		0.03864	-1.38841e-10	-2.85171e-10		0.03864	-7.48807e-12	-7.18231e-10	-1.09825e-10
		0.03866	-1.38841e-10	-2.85171e-10		0.03866	-7.48807e-12	-7.20727e-10	-1.12321e-10
		0.03868	-1.38529e-10	-2.85483e-10		0.03868	-6.86406e-12	-7.21351e-10	-1.12321e-10
		0.0387	-1.40713e-10	-2.83923e-10		0.0387	-6.55206e-12	-7.22599e-10	-1.14817e-10
		0.03872	-1.42273e-10	-2.82363e-10		0.03872	-5.30405e-12	-7.25719e-10	-1.15441e-10
		0.03874	-1.42897e-10	-2.80803e-10		0.03874	-4.68004e-12	-7.25095e-10	-1.15441e-10
		0.03876	-1.42585e-10	-2.79555e-10		0.03876	-3.74404e-12	-7.23223e-10	-1.16689e-10
		0.03878	-1.42273e-10	-2.79243e-10		0.03878	-3.12003e-12	-7.23223e-10	-1.15441e-10
		0.0388	-1.40401e-10	-2.79867e-10		0.0388	-2.80803e-12	-7.20103e-10	-1.16065e-10
		0.03882	-1.39153e-10	-2.80491e-10		0.03882	-2.49602e-12	-7.19479e-10	-1.13569e-10
		0.03884	-1.37593e-10	-2.80491e-10		0.03884	-3.74404e-12	-7.20727e-10	-1.13569e-10
		0.03886	-1.37905e-10	-2.82363e-10		0.03886	-4.68004e-12	-7.20103e-10	-1.14817e-10
		0.03888	-1.37593e-10	-2.83923e-10		0.03888	-5.92806e-12	-7.18855e-10	-1.13569e-10
		0.0389	-1.38841e-10	-2.85483e-10		0.0389	-6.86406e-12	-7.20103e-10	-1.15441e-10
		0.03892	-1.38217e-10	-2.85795e-10		0.03892	-7.80007e-12	-7.21975e-10	-1.15441e-10
		0.03894	-1.37905e-10	-2.86419e-10		0.03894	-7.80007e-12	-7.20103e-10	-1.12945e-10
		0.03896	-1.37281e-10	-2.87043e-10		0.03896	-8.11208e-12	-7.21975e-10	-1.11697e-10
		0.03898	-1.38529e-10	-2.86731e-10		0.03898	-7.17607e-12	-7.23223e-10	-1.09825e-10
		0.039	-1.37281e-10	-2.86731e-10		0.039	-6.86406e-12	-7.23847e-10	-1.11697e-10
		0.03902	-1.38529e-10	-2.85795e-10		0.03902	-5.92806e-12	-7.25719e-10	-1.10449e-10
		0.03904	-1.39153e-10	-2.85171e-10		0.03904	-4.99205e-12	-7.25719e-10	-1.14193e-10
		0.03906	-1.39465e-10	-2.83611e-10		0.03906	-4.05604e-12	-7.25095e-10	-1.15441e-10
		0.03908	-1.38841e-10	-2.83611e-10		0.03908	-4.36804e-12	-7.24471e-10	-1.14193e-10
		0.0391	-1.36969e-10	-2.83923e-10		0.0391	-3.43203e-12	-7.23847e-10	-1.14193e-10
		0.03912	-1.35097e-10	-2.84859e-10		0.03912	-3.43203e-12	-7.21351e-10	-1.12945e-10
		0.03914	-1.36033e-10	-2.86419e-10		0.03914	-4.36804e-12	-7.19479e-10	-1.12321e-10
		0.03916	-1.36345e-10	-2.87355e-10		0.03916	-4.68004e-12	-7.18231e-10	-1.12945e-10
		0.03918	-1.38529e-10	-2.88603e-10		0.03918	-4.68004e-12	-7.16359e-10	-1.12945e-10
		0.0392	-1.39465e-10	-2.87979e-10		0.0392	-4.36804e-12	-7.16359e-10	-1.12945e-10
		0.03922	-1.41025e-10	-2.87667e-10		0.03922	-4.36804e-12	-7.17607e-10	-1.14193e-10
		0.03924	-1.40401e-10	-2.87355e-10		0.03924	-4.05604e-12	-7.18855e-10	-1.12321e-10
		0.03926	-1.39153e-10	-2.86731e-10		0.03926	-4.05604e-12	-7.20727e-10	-1.12321e-10
		0.03928	-1.37905e-10	-2.87043e-10		0.03928	-3.12003e-12	-7.23223e-10	-1.12321e-10
		0.0393	-1.35409e-10	-2.87979e-10		0.0393	-2.80803e-12	-7.23847e-10	-1.12321e-10
		0.03932	-1.34785e-10	-2.88915e-10		0.03932	-1.56001e-12	-7.22599e-10	-1.11697e-10
		0.03934	-1.33225e-10	-2.89851e-10		0.03934	-9.36009e-13	-7.23847e-10	-1.11697e-10
		0.03936	-1.33537e-10	-2.89539e-10		0.03936	-1.56001e-12	-7.25095e-10	-1.11697e-10
		0.03938	-1.34161e-10	-2.88915e-10		0.03938	-1.56001e-12	-7.26967e-10	-1.10449e-10
		0.0394	-1.34473e-10	-2.88291e-10		0.0394	-1.24801e-12	-7.26967e-10	-1.09825e-10
		0.03942	-1.34785e-10	-2.87043e-10		0.03942	-1.87202e-12	-7.26967e-10	-1.09825e-10
		0.03944	-1.35721e-10	-2.85795e-10		0.03944	-6.24006e-13	-7.26343e-10	-1.09825e-10
		0.03946	-1.35721e-10	-2.85171e-10		0.03946	-1.24801e-12	-7.24471e-10	-1.08577e-10
		0.03948	-1.37281e-10	-2.87043e-10		0.03948	-9.36009e-13	-7.22599e-10	-1.10449e-10
		0.0395	-1.37905e-10	-2.89227e-10		0.0395	-6.24006e-13	-7.23223e-10	-1.11697e-10
		0.03952	-1.37593e-10	-2.90475e-10		0.03952	-2.80803e-12	-7.21975e-10	-1.12321e-10
		0.03954	-1.38841e-10	-2.90475e-10		0.03954	-3.74404e-12	-7.23223e-10	-1.13569e-10
		0.03956	-1.38217e-10	-2.91099e-10		0.03956	-4.99205e-12	-7.24471e-10	-1.13569e-10
		0.03958	-1.39153e-10	-2.89851e-10		0.03958	-6.86406e-12	-7.24471e-10	-1.12945e-10
		0.0396	-1.38529e-10	-2.89851e-10		0.0396	-8.11208e-12	-7.23847e-10	-1.11697e-10
		0.03962	-1.37905e-10	-2.89539e-10		0.03962	-7.48807e-12	-7.23223e-10	-1.10449e-10
		0.03964	-1.36969e-10	-2.89227e-10		0.03964	-7.48807e-12	-7.20103e-10	-1.12945e-10
		0.03966	-1.37593e-10	-2.88291e-10		0.03966	-5.61605e-12	-7.18231e-10	-1.14817e-10
		0.03968	-1.36969e-10	-2.86419e-10		0.03968	-4.36804e-12	-7.19479e-10	-1.15441e-10
		0.0397	-1.37593e-10	-2.84859e-10		0.0397	-3.43203e-12	-7.18231e-10	-1.19185e-10
		0.03972	-1.38529e-10	-2.84235e-10		0.03972	-2.80803e-12	-7.20103e-10	-1.18561e-10
		0.03974	-1.38529e-10	-2.83611e-10		0.03974	-2.49602e-12	-7.20103e-10	-1.19185e-10
		0.03976	-1.38841e-10	-2.84859e-10		0.03976	-1.87202e-12	-7.20727e-10	-1.17313e-10
		0.03978	-1.38529e-10	-2.86419e-10		0.03978	-1.24801e-12	-7.20103e-10	-1.16065e-10
		0.0398	-1.37281e-10	-2.89227e-10		0.0398	-1.24801e-12	-7.20727e-10	-1.14193e-10
		0.03982	-1.36969e-10	-2.92035e-10		0.03982	-3.12003e-13	-7.20727e-10	-1.13569e-10
		0.03984	-1.37905e-10	-2.94843e-10		0.03984	-1.24801e-12	-7.18855e-10	-1.12945e-10
		0.03986	-1.38841e-10	-2.97339e-10		0.03986	-2.80803e-12	-7.19479e-10	-1.15441e-10
		0.03988	-1.39465e-10	-2.98275e-10		0.03988	-4.36804e-12	-7.18231e-10	-1.13569e-10
		0.0399	-1.40401e-10	-2.98587e-10		0.0399	-5.30405e-12	-7.18855e-10	-1.13569e-10
		0.03992	-1.39465e-10	-2.97963e-10		0.03992	-7.17607e-12	-7.17607e-10	-1.12321e-10
[truncated: 198,305+ more rows]

## Sheet: 100 Hz data, Panel B
		Panel B_sample EPSC traces					Panel B_normalized EPSC amplitude vs stimulation (#)								Panel B_average depression at EPSCs (#26-30)
		Time (s)	Kyn	Kyn + Dyn	Kyn + Ptp-2		Stimulation (#)	Kyn		Kyn + Dyn		Kyn + Ptp-2				Kyn	Kyn + Dyn	Kyn + Ptp-2
								Mean	SEM	Mean	SEM	Mean	SEM		Mean	0.323	0.1925	0.183
		0	-2.18402e-11	-9.98409e-12	-1.12945e-10		1	1	0	1	0	1	0		SEM	0.02	0.0165	0.01
		2e-05	-2.18402e-11	-9.98409e-12	-1.11073e-10		2	0.969496	0.098149	0.686484	0.0187295	0.637446	0.0558482		n number	5	6	7
		4e-05	-2.12162e-11	-8.73608e-12	-1.11073e-10		3	0.75255	0.0386922	0.528648	0.0208656	0.445275	0.0468362		p-value	--	0.00067	0.0001
		6e-05	-2.05922e-11	-7.48807e-12	-1.12321e-10		4	0.699304	0.0824554	0.420129	0.0141712	0.369522	0.0390073
		8e-05	-2.18402e-11	-5.61605e-12	-1.14193e-10		5	0.639148	0.082068	0.360201	0.0122323	0.320352	0.0297138
		0.0001	-2.05922e-11	-4.36804e-12	-1.11697e-10		6	0.530907	0.032299	0.307261	0.0220096	0.291492	0.0221136
		0.00012	-2.30882e-11	-3.74404e-12	-1.11697e-10		7	0.481493	0.0670607	0.294471	0.0179006	0.269451	0.0253719
		0.00014	-2.30882e-11	-3.12003e-12	-1.11073e-10		8	0.486881	0.0940176	0.257203	0.0136615	0.24505	0.0145589
		0.00016	-2.30882e-11	-3.74404e-12	-1.12321e-10		9	0.439485	0.0318797	0.251112	0.0330712	0.237374	0.0251847
		0.00018	-2.43362e-11	-3.74404e-12	-1.15441e-10		10	0.426341	0.0571663	0.244188	0.019692	0.230739	0.021106
		0.0002	-2.49602e-11	-5.61605e-12	-1.16689e-10		11	0.419933	0.101873	0.206411	0.0164962	0.18819	0.00859974
		0.00022	-2.43362e-11	-6.24006e-12	-1.17937e-10		12	0.338029	0.0272404	0.236568	0.0236903	0.218412	0.0169836
		0.00024	-2.43362e-11	-6.24006e-12	-1.19809e-10		13	0.405897	0.0379281	0.224326	0.0171314	0.174354	0.0180853
		0.00026	-2.62082e-11	-7.48807e-12	-1.19185e-10		14	0.383987	0.0400483	0.213914	0.0270546	0.20084	0.0120324
		0.00028	-2.37122e-11	-8.11208e-12	-1.18561e-10		15	0.303444	0.0429052	0.21094	0.0267997	0.175518	0.0115209
		0.0003	-2.62082e-11	-9.98409e-12	-1.17937e-10		16	0.377527	0.0333444	0.209486	0.0218536	0.167768	0.0171856
		0.00032	-2.55842e-11	-9.36009e-12	-1.17937e-10		17	0.330691	0.0324828	0.18175	0.0265421	0.161255	0.0121665
		0.00034	-2.62082e-11	-9.36009e-12	-1.19185e-10		18	0.31986	0.0279314	0.18454	0.0155021	0.190731	0.012444
		0.00036	-2.49602e-11	-9.36009e-12	-1.18561e-10		19	0.313802	0.0264254	0.208387	0.0119542	0.185055	0.0129095
		0.00038	-2.49602e-11	-1.12321e-11	-1.20433e-10		20	0.339998	0.0406499	0.175726	0.01131	0.186426	0.0134512
		0.0004	-2.55842e-11	-9.98409e-12	-1.18561e-10		21	0.345399	0.0305526	0.191574	0.0181638	0.195375	0.0190445
		0.00042	-2.49602e-11	-1.06081e-11	-1.17937e-10		22	0.339557	0.0401383	0.185041	0.015198	0.178288	0.0141983
		0.00044	-2.37122e-11	-1.06081e-11	-1.16689e-10		23	0.331016	0.0443715	0.184551	0.0192336	0.203208	0.01305
		0.00046	-2.49602e-11	-1.18561e-11	-1.17313e-10		24	0.328216	0.0215043	0.181151	0.0195433	0.176754	0.0139576
		0.00048	-2.49602e-11	-1.24801e-11	-1.16689e-10		25	0.305457	0.0298439	0.183704	0.0244849	0.194635	0.0186583
		0.0005	-2.62082e-11	-1.43521e-11	-1.16689e-10		26	0.311842	0.0305375	0.191376	0.0106332	0.174144	0.0129462
		0.00052	-2.37122e-11	-1.24801e-11	-1.17313e-10		27	0.341145	0.0223413	0.191483	0.0193967	0.197796	0.0198533
		0.00054	-2.49602e-11	-1.37281e-11	-1.18561e-10		28	0.315765	0.0355402	0.209729	0.0284899	0.178456	0.00874196
		0.00056	-2.24642e-11	-1.49761e-11	-1.16689e-10		29	0.351043	0.0425441	0.181509	0.0222889	0.177353	0.0166679
		0.00058	-2.37122e-11	-1.24801e-11	-1.15441e-10		30	0.359644	0.031654	0.18828	0.0147073	0.189432	0.0121127
		0.0006	-2.30882e-11	-1.12321e-11	-1.13569e-10
		0.00062	-2.24642e-11	-9.98409e-12	-1.12321e-10
		0.00064	-2.49602e-11	-8.73608e-12	-1.13569e-10
		0.00066	-2.43362e-11	-8.11208e-12	-1.12945e-10
		0.00068	-2.49602e-11	-8.73608e-12	-1.14817e-10
		0.0007	-2.24642e-11	-8.73608e-12	-1.15441e-10
		0.00072	-2.43362e-11	-8.73608e-12	-1.13569e-10
		0.00074	-2.37122e-11	-9.36009e-12	-1.12321e-10
		0.00076	-2.37122e-11	-9.36009e-12	-1.12945e-10
		0.00078	-2.49602e-11	-8.73608e-12	-1.11697e-10
		0.0008	-2.43362e-11	-1.06081e-11	-1.11073e-10
		0.00082	-2.37122e-11	-1.06081e-11	-1.12321e-10
		0.00084	-2.24642e-11	-1.06081e-11	-1.12321e-10
		0.00086	-2.12162e-11	-1.12321e-11	-1.14193e-10
		0.00088	-2.05922e-11	-1.18561e-11	-1.15441e-10
		0.0009	-2.05922e-11	-1.12321e-11	-1.16689e-10
		0.00092	-2.24642e-11	-1.18561e-11	-1.17313e-10
		0.00094	-2.12162e-11	-9.98409e-12	-1.16689e-10
		0.00096	-2.05922e-11	-8.73608e-12	-1.16065e-10
		0.00098	-2.18402e-11	-8.11208e-12	-1.16689e-10
		0.001	-2.30882e-11	-7.48807e-12	-1.16689e-10
		0.00102	-2.43362e-11	-6.24006e-12	-1.19809e-10
		0.00104	-2.49602e-11	-6.24006e-12	-1.18561e-10
		0.00106	-2.37122e-11	-6.86406e-12	-1.19185e-10
		0.00108	-2.30882e-11	-7.48807e-12	-1.20433e-10
		0.0011	-2.12162e-11	-7.48807e-12	-1.17937e-10
		0.00112	-2.18402e-11	-8.11208e-12	-1.16065e-10
		0.00114	-2.12162e-11	-7.48807e-12	-1.14193e-10
		0.00116	-2.18402e-11	-7.48807e-12	-1.14193e-10
		0.00118	-2.18402e-11	-6.86406e-12	-1.14817e-10
		0.0012	-2.12162e-11	-6.86406e-12	-1.15441e-10
		0.00122	-2.05922e-11	-8.73608e-12	-1.15441e-10
		0.00124	-2.18402e-11	-8.73608e-12	-1.12945e-10
		0.00126	-2.24642e-11	-8.11208e-12	-1.11697e-10
		0.00128	-2.24642e-11	-8.73608e-12	-1.10449e-10
		0.0013	-2.24642e-11	-7.48807e-12	-1.11697e-10
		0.00132	-2.37122e-11	-9.36009e-12	-1.12321e-10
		0.00134	-2.37122e-11	-8.73608e-12	-1.12945e-10
		0.00136	-2.37122e-11	-1.06081e-11	-1.12321e-10
		0.00138	-2.30882e-11	-9.36009e-12	-1.11073e-10
		0.0014	-2.24642e-11	-1.12321e-11	-1.12321e-10
		0.00142	-2.18402e-11	-1.06081e-11	-1.11697e-10
		0.00144	-2.12162e-11	-1.06081e-11	-1.11697e-10
		0.00146	-2.18402e-11	-8.73608e-12	-1.12321e-10
		0.00148	-2.18402e-11	-9.36009e-12	-1.14817e-10
		0.0015	-2.05922e-11	-7.48807e-12	-1.14817e-10
		0.00152	-2.24642e-11	-7.48807e-12	-1.14817e-10
		0.00154	-2.24642e-11	-7.48807e-12	-1.14193e-10
		0.00156	-2.43362e-11	-8.73608e-12	-1.14193e-10
		0.00158	-2.37122e-11	-7.48807e-12	-1.14817e-10
		0.0016	-2.43362e-11	-8.73608e-12	-1.14193e-10
		0.00162	-2.43362e-11	-8.11208e-12	-1.16065e-10
		0.00164	-2.37122e-11	-9.36009e-12	-1.16065e-10
		0.00166	-2.43362e-11	-8.73608e-12	-1.17313e-10
		0.00168	-2.55842e-11	-8.73608e-12	-1.16065e-10
		0.0017	-2.49602e-11	-9.36009e-12	-1.17313e-10
		0.00172	-2.37122e-11	-8.73608e-12	-1.19185e-10
		0.00174	-2.37122e-11	-1.06081e-11	-1.17313e-10
		0.00176	-2.18402e-11	-1.06081e-11	-1.16065e-10
		0.00178	-2.18402e-11	-9.98409e-12	-1.14817e-10
		0.0018	-2.18402e-11	-9.36009e-12	-1.13569e-10
		0.00182	-2.18402e-11	-8.73608e-12	-1.12321e-10
		0.00184	-2.12162e-11	-9.36009e-12	-1.11697e-10
		0.00186	-2.05922e-11	-9.36009e-12	-1.13569e-10
		0.00188	-2.24642e-11	-1.12321e-11	-1.14817e-10
		0.0019	-2.30882e-11	-1.12321e-11	-1.12321e-10
		0.00192	-2.43362e-11	-1.12321e-11	-1.13569e-10
		0.00194	-2.49602e-11	-1.06081e-11	-1.11697e-10
		0.00196	-2.43362e-11	-8.73608e-12	-1.13569e-10
		0.00198	-2.49602e-11	-1.06081e-11	-1.14193e-10
		0.002	-2.49602e-11	-9.98409e-12	-1.15441e-10
		0.00202	-2.49602e-11	-1.12321e-11	-1.16689e-10
		0.00204	-2.43362e-11	-1.12321e-11	-1.17937e-10
		0.00206	-2.12162e-11	-9.98409e-12	-1.17313e-10
		0.00208	-1.99682e-11	-9.98409e-12	-1.17313e-10
		0.0021	-1.93442e-11	-9.98409e-12	-1.16065e-10
		0.00212	-1.93442e-11	-8.11208e-12	-1.15441e-10
		0.00214	-2.12162e-11	-7.48807e-12	-1.15441e-10
		0.00216	-2.12162e-11	-8.73608e-12	-1.14817e-10
		0.00218	-2.37122e-11	-8.11208e-12	-1.14817e-10
		0.0022	-2.43362e-11	-9.36009e-12	-1.15441e-10
		0.00222	-2.37122e-11	-9.98409e-12	-1.14817e-10
		0.00224	-2.43362e-11	-1.18561e-11	-1.15441e-10
		0.00226	-2.24642e-11	-1.24801e-11	-1.12321e-10
		0.00228	-2.24642e-11	-1.06081e-11	-1.12321e-10
		0.0023	-1.93442e-11	-9.36009e-12	-1.11697e-10
		0.00232	-1.80962e-11	-9.36009e-12	-1.12321e-10
		0.00234	-1.74722e-11	-7.48807e-12	-1.13569e-10
		0.00236	-1.62242e-11	-8.11208e-12	-1.12945e-10
		0.00238	-1.49761e-11	-9.36009e-12	-1.12945e-10
		0.0024	-1.62242e-11	-8.73608e-12	-1.14193e-10
		0.00242	-1.49761e-11	-1.06081e-11	-1.13569e-10
		0.00244	-1.74722e-11	-1.06081e-11	-1.13569e-10
		0.00246	-1.74722e-11	-1.12321e-11	-1.12945e-10
		0.00248	-2.05922e-11	-8.73608e-12	-1.12321e-10
		0.0025	-2.18402e-11	-9.98409e-12	-1.14817e-10
		0.00252	-2.18402e-11	-9.36009e-12	-1.19185e-10
		0.00254	-2.12162e-11	-9.36009e-12	-1.18561e-10
		0.00256	-2.18402e-11	-9.98409e-12	-1.20433e-10
		0.00258	-2.18402e-11	-1.12321e-11	-1.19809e-10
		0.0026	-2.05922e-11	-1.06081e-11	-1.16689e-10
		0.00262	-2.18402e-11	-9.36009e-12	-1.15441e-10
		0.00264	-2.24642e-11	-8.73608e-12	-1.16065e-10
		0.00266	-2.43362e-11	-8.11208e-12	-1.14817e-10
		0.00268	-2.49602e-11	-8.11208e-12	-1.17937e-10
		0.0027	-2.55842e-11	-8.11208e-12	-1.17937e-10
		0.00272	-2.49602e-11	-9.98409e-12	-1.17937e-10
		0.00274	-2.55842e-11	-1.12321e-11	-1.18561e-10
		0.00276	-2.49602e-11	-1.06081e-11	-1.17937e-10
		0.00278	-2.37122e-11	-1.06081e-11	-1.14817e-10
		0.0028	-2.24642e-11	-9.98409e-12	-1.15441e-10
		0.00282	-2.30882e-11	-7.48807e-12	-1.14817e-10
		0.00284	-2.24642e-11	-8.73608e-12	-1.15441e-10
		0.00286	-2.37122e-11	-8.73608e-12	-1.16065e-10
		0.00288	-2.43362e-11	-8.11208e-12	-1.16065e-10
		0.0029	-2.49602e-11	-8.11208e-12	-1.16065e-10
		0.00292	-2.24642e-11	-8.73608e-12	-1.16065e-10
		0.00294	-2.30882e-11	-9.98409e-12	-1.14193e-10
		0.00296	-2.18402e-11	-9.36009e-12	-1.15441e-10
		0.00298	-2.18402e-11	-9.36009e-12	-1.15441e-10
		0.003	-2.05922e-11	-9.98409e-12	-1.14817e-10
		0.00302	-2.05922e-11	-9.98409e-12	-1.16065e-10
		0.00304	-1.93442e-11	-9.36009e-12	-1.16065e-10
		0.00306	-1.99682e-11	-8.73608e-12	-1.16065e-10
		0.00308	-2.18402e-11	-8.73608e-12	-1.17313e-10
		0.0031	-2.05922e-11	-8.11208e-12	-1.22305e-10
		0.00312	-2.05922e-11	-7.48807e-12	-1.27921e-10
		0.00314	-1.99682e-11	-6.86406e-12	-1.31041e-10
		0.00316	-1.93442e-11	-6.24006e-12	-1.33537e-10
		0.00318	-1.56001e-11	-6.86406e-12	-1.32289e-10
		0.0032	-1.24801e-11	-5.61605e-12	-1.28545e-10
		0.00322	-9.98409e-12	-7.48807e-12	-1.24801e-10
		0.00324	-9.98409e-12	-6.24006e-12	-1.17313e-10
		0.00326	-8.11208e-12	-7.48807e-12	-1.11697e-10
		0.00328	-9.98409e-12	-8.11208e-12	-1.05457e-10
		0.0033	-9.98409e-12	-8.73608e-12	-1.02337e-10
		0.00332	-1.18561e-11	-1.06081e-11	-1.01713e-10
		0.00334	-1.37281e-11	-1.31041e-11	-1.00465e-10
		0.00336	-1.74722e-11	-1.68482e-11	-1.02961e-10
		0.00338	-2.05922e-11	-2.05922e-11	-1.05457e-10
		0.0034	-2.30882e-11	-2.43362e-11	-1.08577e-10
		0.00342	-2.55842e-11	-2.55842e-11	-1.15441e-10
		0.00344	-2.93283e-11	-2.74563e-11	-1.18561e-10
		0.00346	-3.24483e-11	-2.87043e-11	-1.22305e-10
		0.00348	-3.61923e-11	-3.18243e-11	-1.26049e-10
		0.0035	-3.80644e-11	-3.55683e-11	-1.31041e-10
		0.00352	-3.99364e-11	-3.74403e-11	-1.36033e-10
		0.00354	-4.36804e-11	-3.80644e-11	-1.39777e-10
		0.00356	-4.30564e-11	-3.74403e-11	-1.42273e-10
		0.00358	-4.49284e-11	-3.74403e-11	-1.42897e-10
		0.0036	-4.55524e-11	-3.74403e-11	-1.44769e-10
		0.00362	-4.68004e-11	-3.55683e-11	-1.46017e-10
		0.00364	-4.74244e-11	-3.61923e-11	-1.47265e-10
		0.00366	-4.86725e-11	-3.74403e-11	-1.49761e-10
		0.00368	-5.17925e-11	-3.93124e-11	-1.54129e-10
		0.0037	-5.17925e-11	-3.86884e-11	-1.56001e-10
		0.00372	-5.30405e-11	-3.80644e-11	-1.58497e-10
		0.00374	-5.24165e-11	-3.86884e-11	-1.60369e-10
		0.00376	-5.24165e-11	-3.86884e-11	-1.62866e-10
		0.00378	-5.24165e-11	-3.93124e-11	-1.64114e-10
		0.0038	-5.17925e-11	-3.99364e-11	-1.64738e-10
		0.00382	-5.17925e-11	-4.24324e-11	-1.65986e-10
		0.00384	-5.05445e-11	-4.36804e-11	-1.65986e-10
		0.00386	-5.05445e-11	-4.30564e-11	-1.64738e-10
		0.00388	-4.92965e-11	-4.11844e-11	-1.67234e-10
		0.0039	-4.99205e-11	-4.05604e-11	-1.64738e-10
		0.00392	-5.36645e-11	-3.93124e-11	-1.6349e-10
		0.00394	-5.17925e-11	-3.68163e-11	-1.62866e-10
		0.00396	-5.55365e-11	-3.68163e-11	-1.60993e-10
		0.00398	-5.61605e-11	-3.55683e-11	-1.62242e-10
		0.004	-5.61605e-11	-3.61923e-11	-1.64114e-10
		0.00402	-5.67845e-11	-3.68163e-11	-1.65362e-10
		0.00404	-5.55365e-11	-3.68163e-11	-1.67858e-10
		0.00406	-5.42885e-11	-3.80644e-11	-1.68482e-10
		0.00408	-5.11685e-11	-3.74403e-11	-1.67234e-10
		0.0041	-5.17925e-11	-3.68163e-11	-1.65362e-10
		0.00412	-5.17925e-11	-3.55683e-11	-1.64114e-10
		0.00414	-5.17925e-11	-3.43203e-11	-1.59745e-10
		0.00416	-5.55365e-11	-3.36963e-11	-1.60369e-10
		0.00418	-5.49125e-11	-3.24483e-11	-1.62242e-10
		0.0042	-5.55365e-11	-3.24483e-11	-1.65362e-10
		0.00422	-5.55365e-11	-3.36963e-11	-1.6349e-10
		0.00424	-5.24165e-11	-3.43203e-11	-1.64114e-10
		0.00426	-5.30405e-11	-3.36963e-11	-1.62866e-10
		0.00428	-5.05445e-11	-3.24483e-11	-1.62242e-10
		0.0043	-4.99205e-11	-3.36963e-11	-1.59745e-10
		0.00432	-4.99205e-11	-3.43203e-11	-1.58497e-10
		0.00434	-4.86725e-11	-3.30723e-11	-1.59121e-10
		0.00436	-4.92965e-11	-3.36963e-11	-1.58497e-10
		0.00438	-4.99205e-11	-3.24483e-11	-1.59121e-10
		0.0044	-4.92965e-11	-3.30723e-11	-1.58497e-10
		0.00442	-4.80484e-11	-2.99523e-11	-1.59121e-10
		0.00444	-4.61764e-11	-3.12003e-11	-1.56625e-10
		0.00446	-4.61764e-11	-2.87043e-11	-1.54129e-10
		0.00448	-4.74244e-11	-2.99523e-11	-1.54753e-10
		0.0045	-4.86725e-11	-3.18243e-11	-1.54753e-10
		0.00452	-4.92965e-11	-3.18243e-11	-1.55377e-10
		0.00454	-5.11685e-11	-3.30723e-11	-1.56625e-10
		0.00456	-5.11685e-11	-3.36963e-11	-1.57873e-10
		0.00458	-5.11685e-11	-3.24483e-11	-1.57873e-10
		0.0046	-5.17925e-11	-3.12003e-11	-1.57873e-10
		0.00462	-5.05445e-11	-2.93283e-11	-1.55377e-10
		0.00464	-4.92965e-11	-2.93283e-11	-1.53505e-10
		0.00466	-4.80484e-11	-2.93283e-11	-1.51633e-10
		0.00468	-4.99205e-11	-2.87043e-11	-1.52257e-10
		0.0047	-4.80484e-11	-2.80803e-11	-1.53505e-10
		0.00472	-4.80484e-11	-2.93283e-11	-1.54129e-10
		0.00474	-4.92965e-11	-2.87043e-11	-1.51633e-10
		0.00476	-4.74244e-11	-2.74563e-11	-1.54129e-10
		0.00478	-4.61764e-11	-2.87043e-11	-1.52257e-10
		0.0048	-4.55524e-11	-2.62082e-11	-1.51009e-10
		0.00482	-4.61764e-11	-2.62082e-11	-1.52257e-10
		0.00484	-4.55524e-11	-2.62082e-11	-1.54129e-10
		0.00486	-4.49284e-11	-2.68322e-11	-1.55377e-10
		0.00488	-4.74244e-11	-2.93283e-11	-1.56001e-10
		0.0049	-4.80484e-11	-2.99523e-11	-1.55377e-10
		0.00492	-4.92965e-11	-2.99523e-11	-1.54753e-10
		0.00494	-4.74244e-11	-2.87043e-11	-1.51009e-10
		0.00496	-4.80484e-11	-2.87043e-11	-1.50385e-10
		0.00498	-4.68004e-11	-2.68322e-11	-1.48513e-10
		0.005	-4.74244e-11	-2.68322e-11	-1.47265e-10
		0.00502	-4.55524e-11	-2.68322e-11	-1.47265e-10
		0.00504	-4.43044e-11	-2.74563e-11	-1.46641e-10
		0.00506	-4.24324e-11	-2.80803e-11	-1.47889e-10
		0.00508	-3.99364e-11	-2.93283e-11	-1.46641e-10
		0.0051	-3.99364e-11	-2.62082e-11	-1.46641e-10
		0.00512	-3.80644e-11	-2.68322e-11	-1.47265e-10
		0.00514	-3.99364e-11	-2.55842e-11	-1.47889e-10
		0.00516	-3.93124e-11	-2.43362e-11	-1.48513e-10
		0.00518	-4.11844e-11	-2.62082e-11	-1.51009e-10
		0.0052	-4.11844e-11	-2.49602e-11	-1.51633e-10
		0.00522	-4.30564e-11	-2.55842e-11	-1.51009e-10
		0.00524	-4.30564e-11	-2.62082e-11	-1.50385e-10
		0.00526	-4.18084e-11	-2.55842e-11	-1.49137e-10
		0.00528	-4.24324e-11	-2.55842e-11	-1.47889e-10
		0.0053	-4.24324e-11	-2.49602e-11	-1.46641e-10
		0.00532	-4.24324e-11	-2.43362e-11	-1.45393e-10
		0.00534	-4.43044e-11	-2.43362e-11	-1.47889e-10
		0.00536	-4.36804e-11	-2.37122e-11	-1.48513e-10
		0.00538	-4.43044e-11	-2.37122e-11	-1.47889e-10
		0.0054	-4.36804e-11	-2.43362e-11	-1.49137e-10
		0.00542	-4.36804e-11	-2.43362e-11	-1.47889e-10
		0.00544	-4.18084e-11	-2.24642e-11	-1.47889e-10
		0.00546	-4.18084e-11	-2.18402e-11	-1.46641e-10
		0.00548	-3.93124e-11	-2.05922e-11	-1.46017e-10
		0.0055	-4.11844e-11	-1.99682e-11	-1.45393e-10
		0.00552	-4.05604e-11	-1.93442e-11	-1.46017e-10
		0.00554	-3.93124e-11	-2.05922e-11	-1.44769e-10
		0.00556	-3.74403e-11	-2.05922e-11	-1.44769e-10
		0.00558	-3.68163e-11	-2.18402e-11	-1.44769e-10
		0.0056	-3.74403e-11	-2.30882e-11	-1.44145e-10
		0.00562	-3.68163e-11	-2.49602e-11	-1.44769e-10
		0.00564	-3.74403e-11	-2.24642e-11	-1.45393e-10
		0.00566	-3.86884e-11	-2.49602e-11	-1.47265e-10
		0.00568	-3.99364e-11	-2.18402e-11	-1.47889e-10
		0.0057	-4.11844e-11	-2.24642e-11	-1.48513e-10
		0.00572	-3.93124e-11	-2.30882e-11	-1.49137e-10
		0.00574	-4.11844e-11	-2.30882e-11	-1.46641e-10
		0.00576	-4.05604e-11	-2.30882e-11	-1.44769e-10
		0.00578	-4.05604e-11	-2.24642e-11	-1.42897e-10
		0.0058	-4.18084e-11	-2.24642e-11	-1.40401e-10
		0.00582	-4.24324e-11	-2.37122e-11	-1.39777e-10
		0.00584	-4.43044e-11	-2.30882e-11	-1.38529e-10
		0.00586	-4.36804e-11	-2.05922e-11	-1.39153e-10
		0.00588	-4.36804e-11	-1.99682e-11	-1.41025e-10
		0.0059	-4.36804e-11	-1.99682e-11	-1.41025e-10
		0.00592	-4.24324e-11	-1.93442e-11	-1.41025e-10
		0.00594	-4.11844e-11	-2.05922e-11	-1.41025e-10
		0.00596	-4.18084e-11	-2.12162e-11	-1.41025e-10
		0.00598	-4.05604e-11	-2.12162e-11	-1.41649e-10
		0.006	-4.18084e-11	-2.12162e-11	-1.41649e-10
		0.00602	-4.18084e-11	-2.12162e-11	-1.42273e-10
		0.00604	-4.05604e-11	-2.12162e-11	-1.43521e-10
		0.00606	-3.93124e-11	-1.99682e-11	-1.43521e-10
		0.00608	-3.99364e-11	-2.12162e-11	-1.39153e-10
		0.0061	-4.11844e-11	-2.05922e-11	-1.33537e-10
		0.00612	-4.18084e-11	-2.18402e-11	-1.24801e-10
		0.00614	-4.36804e-11	-2.05922e-11	-1.17937e-10
		0.00616	-4.55524e-11	-2.24642e-11	-1.16065e-10
		0.00618	-4.92965e-11	-2.30882e-11	-1.18561e-10
		0.0062	-4.86725e-11	-2.37122e-11	-1.24801e-10
		0.00622	-5.05445e-11	-2.30882e-11	-1.29169e-10
		0.00624	-5.17925e-11	-2.30882e-11	-1.36657e-10
		0.00626	-5.05445e-11	-2.24642e-11	-1.41025e-10
		0.00628	-4.99205e-11	-2.05922e-11	-1.42897e-10
		0.0063	-4.86725e-11	-1.99682e-11	-1.45393e-10
		0.00632	-4.61764e-11	-1.80962e-11	-1.44145e-10
		0.00634	-4.49284e-11	-1.49761e-11	-1.43521e-10
		0.00636	-4.24324e-11	-1.18561e-11	-1.42897e-10
		0.00638	-3.86884e-11	-9.36009e-12	-1.39153e-10
		0.0064	-3.61923e-11	-9.36009e-12	-1.36033e-10
		0.00642	-3.43203e-11	-7.48807e-12	-1.34161e-10
		0.00644	-3.12003e-11	-4.99205e-12	-1.28545e-10
		0.00646	-2.87043e-11	-3.74404e-12	-1.25425e-10
		0.00648	-2.62082e-11	-2.49602e-12	-1.21681e-10
		0.0065	-2.68322e-11	-1.24801e-12	-1.20433e-10
		0.00652	-2.30882e-11	-6.24006e-13	-1.18561e-10
		0.00654	-2.18402e-11	6.24006e-13	-1.17313e-10
		0.00656	-1.93442e-11	3.12003e-12	-1.14193e-10
		0.00658	-1.74722e-11	6.24006e-12	-1.12321e-10
		0.0066	-1.43521e-11	8.11208e-12	-1.08577e-10
		0.00662	-1.37281e-11	9.36009e-12	-1.05457e-10
		0.00664	-1.18561e-11	9.98409e-12	-1.01713e-10
		0.00666	-1.31041e-11	1.12321e-11	-9.92169e-11
		0.00668	-1.18561e-11	1.18561e-11	-9.79689e-11
		0.0067	-1.12321e-11	9.98409e-12	-9.67209e-11
		0.00672	-1.24801e-11	9.98409e-12	-9.54729e-11
		0.00674	-1.18561e-11	9.98409e-12	-9.42249e-11
		0.00676	-1.24801e-11	6.86406e-12	-9.17289e-11
		0.00678	-1.12321e-11	7.48807e-12	-8.98568e-11
		0.0068	-1.12321e-11	6.86406e-12	-8.79848e-11
		0.00682	-1.06081e-11	7.48807e-12	-8.61128e-11
		0.00684	-8.11208e-12	9.36009e-12	-8.67368e-11
		0.00686	-7.48807e-12	1.18561e-11	-8.67368e-11
		0.00688	-8.11208e-12	1.24801e-11	-8.67368e-11
		0.0069	-6.24006e-12	1.31041e-11	-8.86088e-11
		0.00692	-6.86406e-12	1.18561e-11	-8.73608e-11
		0.00694	-6.24006e-12	1.24801e-11	-8.73608e-11
		0.00696	-7.48807e-12	1.24801e-11	-8.67368e-11
		0.00698	-7.48807e-12	1.18561e-11	-8.54888e-11
		0.007	-7.48807e-12	1.18561e-11	-8.61128e-11
		0.00702	-6.86406e-12	1.12321e-11	-8.54888e-11
		0.00704	-8.73608e-12	1.06081e-11	-8.67368e-11
		0.00706	-5.61605e-12	8.73608e-12	-8.67368e-11
		0.00708	-6.24006e-12	8.73608e-12	-8.67368e-11
		0.0071	-4.99205e-12	8.11208e-12	-8.67368e-11
		0.00712	-4.36804e-12	8.11208e-12	-8.61128e-11
		0.00714	-4.36804e-12	8.11208e-12	-8.48648e-11
		0.00716	-5.61605e-12	4.99205e-12	-8.79848e-11
		0.00718	-4.99205e-12	4.99205e-12	-8.86088e-11
		0.0072	-4.99205e-12	4.36804e-12	-9.04808e-11
		0.00722	-4.99205e-12	3.12003e-12	-8.92328e-11
		0.00724	-4.99205e-12	6.24006e-12	-8.86088e-11
		0.00726	-4.36804e-12	6.24006e-12	-8.79848e-11
		0.00728	-4.36804e-12	5.61605e-12	-8.61128e-11
		0.0073	-6.24006e-12	6.24006e-12	-8.54888e-11
		0.00732	-7.48807e-12	5.61605e-12	-8.79848e-11
		0.00734	-1.06081e-11	4.99205e-12	-8.86088e-11
		0.00736	-1.06081e-11	4.99205e-12	-8.92328e-11
		0.00738	-1.18561e-11	4.36804e-12	-9.04808e-11
		0.0074	-1.12321e-11	4.36804e-12	-9.17289e-11
		0.00742	-9.36009e-12	4.36804e-12	-9.11049e-11
		0.00744	-8.73608e-12	4.99205e-12	-8.98568e-11
		0.00746	-6.86406e-12	3.12003e-12	-8.98568e-11
		0.00748	-5.61605e-12	3.74404e-12	-8.86088e-11
		0.0075	-7.48807e-12	3.12003e-12	-8.98568e-11
		0.00752	-4.99205e-12	1.87202e-12	-9.23529e-11
		0.00754	-6.86406e-12	1.87202e-12	-9.29769e-11
		0.00756	-4.99205e-12	1.87202e-12	-9.48489e-11
		0.00758	-5.61605e-12	1.24801e-12	-9.60969e-11
		0.0076	-6.24006e-12	1.87202e-12	-9.48489e-11
		0.00762	-7.48807e-12	1.87202e-12	-9.48489e-11
		0.00764	-7.48807e-12	1.87202e-12	-9.36009e-11
		0.00766	-1.06081e-11	1.24801e-12	-9.29769e-11
		0.00768	-9.98409e-12	2.49602e-12	-9.48489e-11
		0.0077	-1.12321e-11	2.49602e-12	-9.54729e-11
		0.00772	-1.06081e-11	1.87202e-12	-9.54729e-11
		0.00774	-1.18561e-11	1.87202e-12	-9.48489e-11
		0.00776	-1.18561e-11	1.24801e-12	-9.29769e-11
		0.00778	-1.06081e-11	4.36804e-12	-8.98568e-11
		0.0078	-1.06081e-11	4.99205e-12	-9.23529e-11
		0.00782	-1.18561e-11	4.36804e-12	-9.23529e-11
		0.00784	-1.24801e-11	4.99205e-12	-9.54729e-11
		0.00786	-1.31041e-11	3.74404e-12	-9.73449e-11
		0.00788	-1.43521e-11	1.24801e-12	-9.85929e-11
		0.0079	-1.43521e-11	1.24801e-12	-9.85929e-11
		0.00792	-1.43521e-11	0	-9.92169e-11
		0.00794	-1.56001e-11	-1.24801e-12	-9.67209e-11
		0.00796	-1.56001e-11	-6.24006e-13	-9.54729e-11
		0.00798	-1.62242e-11	0	-9.36009e-11
		0.008	-1.62242e-11	-6.24006e-13	-9.36009e-11
		0.00802	-1.80962e-11	1.24801e-12	-9.48489e-11
		0.00804	-1.68482e-11	1.87202e-12	-9.67209e-11
		0.00806	-1.68482e-11	1.87202e-12	-9.73449e-11
		0.00808	-1.80962e-11	2.49602e-12	-9.92169e-11
		0.0081	-1.74722e-11	2.49602e-12	-9.85929e-11
		0.00812	-1.62242e-11	1.24801e-12	-9.85929e-11
		0.00814	-1.49761e-11	6.24006e-13	-9.73449e-11
		0.00816	-1.68482e-11	-1.24801e-12	-9.54729e-11
		0.00818	-1.68482e-11	-4.99205e-12	-9.79689e-11
		0.0082	-1.62242e-11	-5.61605e-12	-9.60969e-11
		0.00822	-1.80962e-11	-6.86406e-12	-9.73449e-11
		0.00824	-1.74722e-11	-8.73608e-12	-9.79689e-11
		0.00826	-1.74722e-11	-7.48807e-12	-9.73449e-11
		0.00828	-1.80962e-11	-5.61605e-12	-9.48489e-11
		0.0083	-1.68482e-11	-3.12003e-12	-9.48489e-11
		0.00832	-1.80962e-11	-2.49602e-12	-9.48489e-11
		0.00834	-1.87202e-11	-1.87202e-12	-9.79689e-11
		0.00836	-1.87202e-11	0	-1.02961e-10
		0.00838	-2.05922e-11	0	-1.04833e-10
		0.0084	-1.87202e-11	-1.87202e-12	-1.09201e-10
		0.00842	-1.93442e-11	-1.24801e-12	-1.07329e-10
		0.00844	-1.87202e-11	-2.49602e-12	-1.06705e-10
		0.00846	-1.93442e-11	-1.87202e-12	-1.04209e-10
		0.00848	-1.93442e-11	-2.49602e-12	-1.03585e-10
		0.0085	-1.87202e-11	-3.12003e-12	-1.03585e-10
		0.00852	-1.80962e-11	-2.49602e-12	-1.03585e-10
		0.00854	-1.93442e-11	-1.87202e-12	-1.04833e-10
		0.00856	-1.87202e-11	-2.49602e-12	-1.05457e-10
		0.00858	-1.74722e-11	-3.74404e-12	-1.04209e-10
		0.0086	-1.74722e-11	-3.12003e-12	-1.03585e-10
		0.00862	-1.80962e-11	-2.49602e-12	-1.01713e-10
		0.00864	-1.80962e-11	-2.49602e-12	-1.00465e-10
		0.00866	-1.80962e-11	-2.49602e-12	-1.00465e-10
		0.00868	-1.74722e-11	-2.49602e-12	-1.01089e-10
		0.0087	-1.74722e-11	-3.12003e-12	-1.04209e-10
		0.00872	-1.68482e-11	-6.24006e-13	-1.06705e-10
		0.00874	-1.62242e-11	-1.24801e-12	-1.08577e-10
		0.00876	-1.56001e-11	0	-1.07329e-10
		0.00878	-1.49761e-11	0	-1.06705e-10
		0.0088	-1.56001e-11	2.49602e-12	-1.06081e-10
		0.00882	-1.62242e-11	2.49602e-12	-1.06705e-10
		0.00884	-1.62242e-11	1.24801e-12	-1.06705e-10
		0.00886	-1.80962e-11	1.24801e-12	-1.08577e-10
		0.00888	-1.93442e-11	-6.24006e-13	-1.06705e-10
		0.0089	-1.99682e-11	-6.24006e-13	-1.06705e-10
		0.00892	-2.05922e-11	0	-1.06081e-10
		0.00894	-1.80962e-11	-1.24801e-12	-1.05457e-10
		0.00896	-1.80962e-11	-1.24801e-12	-1.04833e-10
		0.00898	-1.74722e-11	-1.87202e-12	-1.05457e-10
		0.009	-1.68482e-11	-4.36804e-12	-1.06081e-10
		0.00902	-1.74722e-11	-5.61605e-12	-1.05457e-10
		0.00904	-1.80962e-11	-7.48807e-12	-1.06705e-10
		0.00906	-1.87202e-11	-8.11208e-12	-1.06081e-10
		0.00908	-1.87202e-11	-8.11208e-12	-1.04209e-10
		0.0091	-1.87202e-11	-8.73608e-12	-1.03585e-10
		0.00912	-1.87202e-11	-8.11208e-12	-1.04209e-10
		0.00914	-1.80962e-11	-6.86406e-12	-1.04833e-10
		0.00916	-1.87202e-11	-5.61605e-12	-1.05457e-10
		0.00918	-1.87202e-11	-5.61605e-12	-1.06705e-10
		0.0092	-1.93442e-11	-4.36804e-12	-1.08577e-10
		0.00922	-1.87202e-11	-2.49602e-12	-1.09201e-10
		0.00924	-1.87202e-11	-2.49602e-12	-1.07953e-10
		0.00926	-1.62242e-11	-3.74404e-12	-1.07953e-10
		0.00928	-1.68482e-11	-2.49602e-12	-1.06081e-10
		0.0093	-1.56001e-11	-4.99205e-12	-1.05457e-10
		0.00932	-1.80962e-11	-4.36804e-12	-1.05457e-10
		0.00934	-1.80962e-11	-4.99205e-12	-1.06081e-10
		0.00936	-1.93442e-11	-4.36804e-12	-1.07329e-10
		0.00938	-1.87202e-11	-5.61605e-12	-1.09825e-10
		0.0094	-1.87202e-11	-4.99205e-12	-1.09825e-10
		0.00942	-1.87202e-11	-4.36804e-12	-1.09201e-10
		0.00944	-1.80962e-11	-5.61605e-12	-1.07953e-10
		0.00946	-1.74722e-11	-6.24006e-12	-1.04209e-10
		0.00948	-1.62242e-11	-6.86406e-12	-1.03585e-10
		0.0095	-1.56001e-11	-6.86406e-12	-1.02961e-10
		0.00952	-1.56001e-11	-6.24006e-12	-1.05457e-10
		0.00954	-1.62242e-11	-6.24006e-12	-1.06081e-10
		0.00956	-1.68482e-11	-5.61605e-12	-1.06705e-10
		0.00958	-1.74722e-11	-2.49602e-12	-1.05457e-10
		0.0096	-1.87202e-11	-2.49602e-12	-1.06081e-10
		0.00962	-1.80962e-11	-1.24801e-12	-1.06705e-10
		0.00964	-1.87202e-11	-6.24006e-13	-1.06081e-10
		0.00966	-2.12162e-11	-1.87202e-12	-1.05457e-10
		0.00968	-2.12162e-11	-3.74404e-12	-1.07953e-10
		0.0097	-1.93442e-11	-5.61605e-12	-1.07953e-10
		0.00972	-1.93442e-11	-7.48807e-12	-1.09201e-10
		0.00974	-1.87202e-11	-9.36009e-12	-1.09201e-10
		0.00976	-2.05922e-11	-9.36009e-12	-1.08577e-10
		0.00978	-2.05922e-11	-1.06081e-11	-1.07329e-10
		0.0098	-2.05922e-11	-9.36009e-12	-1.08577e-10
		0.00982	-2.05922e-11	-1.12321e-11	-1.08577e-10
		0.00984	-2.12162e-11	-1.12321e-11	-1.07953e-10
		0.00986	-2.18402e-11	-1.06081e-11	-1.08577e-10
		0.00988	-2.18402e-11	-1.06081e-11	-1.08577e-10
		0.0099	-2.24642e-11	-1.06081e-11	-1.11697e-10
		0.00992	-2.12162e-11	-9.98409e-12	-1.10449e-10
		0.00994	-2.05922e-11	-9.36009e-12	-1.12945e-10
		0.00996	-2.12162e-11	-9.36009e-12	-1.14817e-10
		0.00998	-1.80962e-11	-8.73608e-12	-1.14817e-10
		0.01	-1.74722e-11	-7.48807e-12	-1.15441e-10
		0.01002	-1.74722e-11	-9.36009e-12	-1.14193e-10
		0.01004	-1.62242e-11	-9.36009e-12	-1.16689e-10
		0.01006	-1.68482e-11	-1.12321e-11	-1.16065e-10
		0.01008	-1.68482e-11	-1.06081e-11	-1.13569e-10
		0.0101	-1.74722e-11	-1.06081e-11	-1.14193e-10
		0.01012	-1.62242e-11	-1.06081e-11	-1.11073e-10
		0.01014	-1.93442e-11	-9.36009e-12	-1.10449e-10
		0.01016	-1.87202e-11	-8.73608e-12	-1.09201e-10
		0.01018	-1.87202e-11	-9.98409e-12	-1.08577e-10
		0.0102	-1.93442e-11	-1.18561e-11	-1.08577e-10
		0.01022	-1.99682e-11	-1.18561e-11	-1.07953e-10
		0.01024	-2.12162e-11	-1.24801e-11	-1.07329e-10
		0.01026	-2.12162e-11	-1.56001e-11	-1.07329e-10
		0.01028	-2.12162e-11	-1.37281e-11	-1.07953e-10
		0.0103	-2.18402e-11	-1.24801e-11	-1.07953e-10
		0.01032	-2.12162e-11	-9.98409e-12	-1.07953e-10
		0.01034	-2.24642e-11	-9.36009e-12	-1.07329e-10
		0.01036	-2.24642e-11	-8.73608e-12	-1.07953e-10
		0.01038	-2.12162e-11	-7.48807e-12	-1.08577e-10
		0.0104	-1.93442e-11	-7.48807e-12	-1.06705e-10
		0.01042	-1.87202e-11	-6.86406e-12	-1.07329e-10
		0.01044	-1.87202e-11	-5.61605e-12	-1.08577e-10
		0.01046	-1.87202e-11	-5.61605e-12	-1.09201e-10
		0.01048	-1.93442e-11	-4.36804e-12	-1.11073e-10
		0.0105	-1.99682e-11	-1.87202e-12	-1.11697e-10
		0.01052	-1.99682e-11	-3.74404e-12	-1.12321e-10
		0.01054	-2.05922e-11	-2.49602e-12	-1.12945e-10
		0.01056	-2.18402e-11	-3.12003e-12	-1.12321e-10
		0.01058	-2.05922e-11	-2.49602e-12	-1.13569e-10
		0.0106	-2.18402e-11	-4.36804e-12	-1.12321e-10
		0.01062	-2.05922e-11	-4.36804e-12	-1.12321e-10
		0.01064	-2.24642e-11	-4.36804e-12	-1.11697e-10
		0.01066	-2.18402e-11	-2.49602e-12	-1.12945e-10
		0.01068	-2.24642e-11	-3.74404e-12	-1.11697e-10
		0.0107	-2.43362e-11	-4.36804e-12	-1.13569e-10
		0.01072	-2.43362e-11	-3.74404e-12	-1.14193e-10
		0.01074	-2.37122e-11	-3.74404e-12	-1.12321e-10
		0.01076	-2.37122e-11	-3.12003e-12	-1.12321e-10
		0.01078	-2.49602e-11	-4.36804e-12	-1.11073e-10
		0.0108	-2.37122e-11	-4.36804e-12	-1.10449e-10
		0.01082	-2.37122e-11	-3.74404e-12	-1.07953e-10
		0.01084	-2.37122e-11	-3.12003e-12	-1.09825e-10
		0.01086	-2.43362e-11	-2.49602e-12	-1.11697e-10
		0.01088	-2.43362e-11	-5.61605e-12	-1.11697e-10
		0.0109	-2.37122e-11	-6.86406e-12	-1.12321e-10
		0.01092	-2.43362e-11	-9.36009e-12	-1.13569e-10
		0.01094	-2.55842e-11	-9.36009e-12	-1.12321e-10
		0.01096	-2.43362e-11	-1.12321e-11	-1.12321e-10
		0.01098	-2.49602e-11	-1.24801e-11	-1.11073e-10
		0.011	-2.37122e-11	-1.49761e-11	-1.12321e-10
		0.01102	-2.24642e-11	-1.62242e-11	-1.12321e-10
		0.01104	-2.18402e-11	-1.62242e-11	-1.14817e-10
		0.01106	-2.05922e-11	-1.62242e-11	-1.14817e-10
		0.01108	-1.99682e-11	-1.62242e-11	-1.13569e-10
		0.0111	-1.93442e-11	-1.49761e-11	-1.12945e-10
		0.01112	-1.87202e-11	-1.31041e-11	-1.12321e-10
		0.01114	-1.87202e-11	-1.43521e-11	-1.12321e-10
		0.01116	-1.87202e-11	-1.49761e-11	-1.11697e-10
		0.01118	-1.87202e-11	-1.56001e-11	-1.10449e-10
		0.0112	-1.99682e-11	-1.68482e-11	-1.11073e-10
		0.01122	-2.12162e-11	-1.62242e-11	-1.10449e-10
		0.01124	-2.24642e-11	-1.62242e-11	-1.07953e-10
		0.01126	-2.37122e-11	-1.68482e-11	-1.06705e-10
		0.01128	-2.49602e-11	-1.43521e-11	-1.07329e-10
		0.0113	-2.43362e-11	-1.24801e-11	-1.06705e-10
		0.01132	-2.30882e-11	-1.18561e-11	-1.09825e-10
		0.01134	-2.24642e-11	-1.24801e-11	-1.11073e-10
		0.01136	-2.18402e-11	-1.37281e-11	-1.12321e-10
		0.01138	-2.18402e-11	-1.43521e-11	-1.14193e-10
		0.0114	-2.24642e-11	-1.24801e-11	-1.14193e-10
		0.01142	-2.24642e-11	-1.18561e-11	-1.14817e-10
		0.01144	-2.30882e-11	-1.18561e-11	-1.14817e-10
		0.01146	-2.37122e-11	-1.18561e-11	-1.13569e-10
		0.01148	-2.43362e-11	-1.06081e-11	-1.11697e-10
		0.0115	-2.55842e-11	-9.36009e-12	-1.10449e-10
		0.01152	-2.62082e-11	-8.73608e-12	-1.09825e-10
		0.01154	-2.62082e-11	-8.73608e-12	-1.10449e-10
		0.01156	-2.74563e-11	-8.11208e-12	-1.09201e-10
		0.01158	-2.74563e-11	-7.48807e-12	-1.09201e-10
		0.0116	-2.62082e-11	-9.98409e-12	-1.08577e-10
		0.01162	-2.62082e-11	-9.98409e-12	-1.07329e-10
		0.01164	-2.37122e-11	-1.06081e-11	-1.09825e-10
		0.01166	-2.43362e-11	-9.98409e-12	-1.11073e-10
		0.01168	-2.43362e-11	-9.36009e-12	-1.12321e-10
		0.0117	-2.43362e-11	-8.11208e-12	-1.12945e-10
		0.01172	-2.43362e-11	-9.36009e-12	-1.11697e-10
		0.01174	-2.49602e-11	-8.73608e-12	-1.11697e-10
		0.01176	-2.43362e-11	-9.36009e-12	-1.11697e-10
		0.01178	-2.55842e-11	-7.48807e-12	-1.13569e-10
		0.0118	-2.55842e-11	-7.48807e-12	-1.14817e-10
		0.01182	-2.55842e-11	-7.48807e-12	-1.15441e-10
		0.01184	-2.49602e-11	-8.73608e-12	-1.17313e-10
		0.01186	-2.49602e-11	-9.36009e-12	-1.17313e-10
		0.01188	-2.37122e-11	-7.48807e-12	-1.15441e-10
		0.0119	-2.43362e-11	-6.24006e-12	-1.15441e-10
		0.01192	-2.49602e-11	-6.86406e-12	-1.14193e-10
		0.01194	-2.55842e-11	-5.61605e-12	-1.12945e-10
		0.01196	-2.30882e-11	-7.48807e-12	-1.11073e-10
		0.01198	-2.24642e-11	-8.11208e-12	-1.11697e-10
		0.012	-2.12162e-11	-8.73608e-12	-1.11697e-10
		0.01202	-2.05922e-11	-7.48807e-12	-1.11697e-10
		0.01204	-2.12162e-11	-7.48807e-12	-1.11697e-10
		0.01206	-2.12162e-11	-6.24006e-12	-1.13569e-10
		0.01208	-2.24642e-11	-6.86406e-12	-1.12945e-10
		0.0121	-2.18402e-11	-6.86406e-12	-1.14193e-10
		0.01212	-2.18402e-11	-4.99205e-12	-1.14193e-10
		0.01214	-2.37122e-11	-6.86406e-12	-1.14817e-10
		0.01216	-2.37122e-11	-8.11208e-12	-1.16689e-10
		0.01218	-2.49602e-11	-9.36009e-12	-1.17313e-10
		0.0122	-2.55842e-11	-9.98409e-12	-1.19185e-10
		0.01222	-2.49602e-11	-1.06081e-11	-1.17313e-10
		0.01224	-2.55842e-11	-9.98409e-12	-1.16065e-10
		0.01226	-2.49602e-11	-9.36009e-12	-1.17313e-10
		0.01228	-2.49602e-11	-7.48807e-12	-1.14817e-10
		0.0123	-2.43362e-11	-8.11208e-12	-1.14193e-10
		0.01232	-2.68322e-11	-7.48807e-12	-1.14193e-10
		0.01234	-2.62082e-11	-6.24006e-12	-1.14193e-10
		0.01236	-2.62082e-11	-7.48807e-12	-1.15441e-10
		0.01238	-2.74563e-11	-7.48807e-12	-1.15441e-10
		0.0124	-2.62082e-11	-8.11208e-12	-1.12321e-10
		0.01242	-2.49602e-11	-7.48807e-12	-1.09825e-10
		0.01244	-2.43362e-11	-6.86406e-12	-1.07953e-10
		0.01246	-2.37122e-11	-6.24006e-12	-1.05457e-10
		0.01248	-2.37122e-11	-4.99205e-12	-1.06081e-10
		0.0125	-2.24642e-11	-6.24006e-12	-1.06705e-10
		0.01252	-2.37122e-11	-5.61605e-12	-1.09201e-10
		0.01254	-2.43362e-11	-5.61605e-12	-1.09201e-10
		0.01256	-2.37122e-11	-6.86406e-12	-1.10449e-10
		0.01258	-2.30882e-11	-7.48807e-12	-1.11073e-10
		0.0126	-2.49602e-11	-7.48807e-12	-1.11697e-10
		0.01262	-2.55842e-11	-6.86406e-12	-1.14193e-10
		0.01264	-2.55842e-11	-6.24006e-12	-1.13569e-10
		0.01266	-2.68322e-11	-7.48807e-12	-1.13569e-10
		0.01268	-2.55842e-11	-6.86406e-12	-1.14817e-10
		0.0127	-2.49602e-11	-7.48807e-12	-1.13569e-10
		0.01272	-2.62082e-11	-8.11208e-12	-1.13569e-10
		0.01274	-2.62082e-11	-8.73608e-12	-1.11073e-10
		0.01276	-2.43362e-11	-8.11208e-12	-1.11073e-10
		0.01278	-2.55842e-11	-8.11208e-12	-1.12321e-10
		0.0128	-2.30882e-11	-7.48807e-12	-1.14817e-10
		0.01282	-2.37122e-11	-8.11208e-12	-1.17937e-10
		0.01284	-2.43362e-11	-9.36009e-12	-1.19185e-10
		0.01286	-2.43362e-11	-8.11208e-12	-1.18561e-10
		0.01288	-2.30882e-11	-9.98409e-12	-1.17313e-10
		0.0129	-2.30882e-11	-9.36009e-12	-1.16065e-10
		0.01292	-2.24642e-11	-9.36009e-12	-1.14193e-10
		0.01294	-1.99682e-11	-9.98409e-12	-1.14817e-10
		0.01296	-2.05922e-11	-1.12321e-11	-1.13569e-10
		0.01298	-2.05922e-11	-1.06081e-11	-1.13569e-10
		0.013	-2.18402e-11	-9.36009e-12	-1.14817e-10
		0.01302	-2.12162e-11	-9.36009e-12	-1.11697e-10
		0.01304	-2.30882e-11	-9.36009e-12	-1.14193e-10
		0.01306	-2.37122e-11	-8.73608e-12	-1.12945e-10
		0.01308	-2.30882e-11	-6.24006e-12	-1.12321e-10
		0.0131	-2.30882e-11	-5.61605e-12	-1.12321e-10
		0.01312	-2.24642e-11	-4.99205e-12	-1.12321e-10
		0.01314	-2.24642e-11	-3.12003e-12	-1.11697e-10
		0.01316	-2.30882e-11	-1.24801e-12	-1.12321e-10
		0.01318	-2.30882e-11	-2.49602e-12	-1.11073e-10
		0.0132	-2.24642e-11	-3.74404e-12	-1.11697e-10
		0.01322	-2.24642e-11	-5.61605e-12	-1.09825e-10
		0.01324	-2.30882e-11	-6.86406e-12	-1.11073e-10
		0.01326	-2.18402e-11	-5.61605e-12	-1.11697e-10
		0.01328	-2.18402e-11	-6.86406e-12	-1.11073e-10
		0.0133	-2.18402e-11	-6.86406e-12	-1.11073e-10
		0.01332	-2.12162e-11	-6.24006e-12	-1.10449e-10
		0.01334	-2.24642e-11	-6.86406e-12	-1.10449e-10
		0.01336	-2.24642e-11	-6.24006e-12	-1.11073e-10
		0.01338	-2.24642e-11	-6.24006e-12	-1.11697e-10
		0.0134	-2.30882e-11	-6.86406e-12	-1.12945e-10
		0.01342	-2.43362e-11	-5.61605e-12	-1.12945e-10
		0.01344	-2.55842e-11	-8.11208e-12	-1.14817e-10
		0.01346	-2.55842e-11	-6.86406e-12	-1.16065e-10
		0.01348	-2.55842e-11	-6.86406e-12	-1.17313e-10
		0.0135	-2.68322e-11	-6.86406e-12	-1.16689e-10
		0.01352	-2.55842e-11	-7.48807e-12	-1.17313e-10
		0.01354	-2.49602e-11	-5.61605e-12	-1.16065e-10
		0.01356	-2.49602e-11	-4.99205e-12	-1.14817e-10
		0.01358	-2.49602e-11	-3.74404e-12	-1.13569e-10
		0.0136	-2.37122e-11	-2.49602e-12	-1.13569e-10
		0.01362	-2.24642e-11	-2.49602e-12	-1.13569e-10
		0.01364	-2.37122e-11	-3.74404e-12	-1.14817e-10
		0.01366	-2.30882e-11	-4.99205e-12	-1.14193e-10
		0.01368	-2.24642e-11	-8.11208e-12	-1.12945e-10
		0.0137	-2.18402e-11	-7.48807e-12	-1.11697e-10
		0.01372	-2.24642e-11	-5.61605e-12	-1.11697e-10
		0.01374	-2.30882e-11	-6.86406e-12	-1.10449e-10
		0.01376	-2.24642e-11	-6.24006e-12	-1.10449e-10
		0.01378	-2.37122e-11	-5.61605e-12	-1.09825e-10
		0.0138	-2.37122e-11	-5.61605e-12	-1.11697e-10
		0.01382	-2.49602e-11	-4.99205e-12	-1.10449e-10
		0.01384	-2.37122e-11	-6.86406e-12	-1.11697e-10
		0.01386	-2.49602e-11	-6.24006e-12	-1.11697e-10
		0.01388	-2.24642e-11	-6.24006e-12	-1.12321e-10
		0.0139	-2.18402e-11	-4.99205e-12	-1.13569e-10
		0.01392	-2.05922e-11	-4.99205e-12	-1.15441e-10
		0.01394	-2.12162e-11	-3.74404e-12	-1.15441e-10
		0.01396	-2.24642e-11	-4.99205e-12	-1.15441e-10
		0.01398	-2.24642e-11	-6.24006e-12	-1.16689e-10
		0.014	-2.30882e-11	-8.11208e-12	-1.17937e-10
		0.01402	-2.49602e-11	-8.11208e-12	-1.17313e-10
		0.01404	-2.43362e-11	-8.73608e-12	-1.16065e-10
		0.01406	-2.37122e-11	-9.98409e-12	-1.14193e-10
		0.01408	-2.43362e-11	-9.98409e-12	-1.11073e-10
		0.0141	-2.30882e-11	-9.98409e-12	-1.09825e-10
		0.01412	-2.37122e-11	-7.48807e-12	-1.09825e-10
		0.01414	-2.37122e-11	-8.11208e-12	-1.11697e-10
		0.01416	-2.24642e-11	-5.61605e-12	-1.12321e-10
		0.01418	-2.30882e-11	-6.24006e-12	-1.11697e-10
		0.0142	-2.12162e-11	-6.24006e-12	-1.11697e-10
		0.01422	-2.24642e-11	-4.99205e-12	-1.09825e-10
		0.01424	-2.05922e-11	-6.24006e-12	-1.10449e-10
		0.01426	-2.12162e-11	-6.24006e-12	-1.09201e-10
		0.01428	-2.12162e-11	-5.61605e-12	-1.09825e-10
		0.0143	-2.30882e-11	-6.24006e-12	-1.11073e-10
		0.01432	-2.05922e-11	-8.11208e-12	-1.13569e-10
		0.01434	-2.37122e-11	-6.86406e-12	-1.13569e-10
		0.01436	-2.30882e-11	-7.48807e-12	-1.13569e-10
		0.01438	-2.55842e-11	-6.86406e-12	-1.13569e-10
		0.0144	-2.62082e-11	-6.24006e-12	-1.13569e-10
		0.01442	-2.55842e-11	-7.48807e-12	-1.12321e-10
		0.01444	-2.55842e-11	-6.86406e-12	-1.12945e-10
		0.01446	-2.49602e-11	-6.24006e-12	-1.13569e-10
		0.01448	-2.55842e-11	-7.48807e-12	-1.14817e-10
		0.0145	-2.49602e-11	-6.86406e-12	-1.14817e-10
		0.01452	-2.37122e-11	-7.48807e-12	-1.15441e-10
		0.01454	-2.30882e-11	-7.48807e-12	-1.16689e-10
		0.01456	-2.30882e-11	-8.11208e-12	-1.14817e-10
		0.01458	-2.43362e-11	-8.73608e-12	-1.13569e-10
		0.0146	-2.30882e-11	-6.86406e-12	-1.11697e-10
		0.01462	-2.18402e-11	-5.61605e-12	-1.09825e-10
		0.01464	-2.18402e-11	-6.24006e-12	-1.09201e-10
		0.01466	-2.30882e-11	-6.24006e-12	-1.09825e-10
		0.01468	-2.30882e-11	-7.48807e-12	-1.10449e-10
		0.0147	-2.24642e-11	-8.73608e-12	-1.09825e-10
		0.01472	-2.30882e-11	-9.36009e-12	-1.10449e-10
		0.01474	-2.24642e-11	-1.06081e-11	-1.10449e-10
		0.01476	-2.12162e-11	-1.06081e-11	-1.09201e-10
		0.01478	-2.18402e-11	-9.98409e-12	-1.09201e-10
		0.0148	-2.18402e-11	-1.12321e-11	-1.09201e-10
		0.01482	-2.18402e-11	-9.98409e-12	-1.09825e-10
		0.01484	-2.12162e-11	-9.98409e-12	-1.11697e-10
		0.01486	-2.12162e-11	-9.36009e-12	-1.12945e-10
		0.01488	-2.12162e-11	-8.11208e-12	-1.14817e-10
		0.0149	-2.12162e-11	-8.11208e-12	-1.15441e-10
		0.01492	-2.05922e-11	-6.86406e-12	-1.14817e-10
		0.01494	-2.12162e-11	-8.11208e-12	-1.12945e-10
		0.01496	-2.12162e-11	-8.73608e-12	-1.11697e-10
		0.01498	-2.37122e-11	-9.36009e-12	-1.11073e-10
		0.015	-2.43362e-11	-1.06081e-11	-1.09201e-10
		0.01502	-2.55842e-11	-1.06081e-11	-1.09825e-10
		0.01504	-2.55842e-11	-8.73608e-12	-1.12321e-10
		0.01506	-2.49602e-11	-9.98409e-12	-1.12945e-10
		0.01508	-2.55842e-11	-9.98409e-12	-1.14817e-10
		0.0151	-2.37122e-11	-6.24006e-12	-1.16065e-10
		0.01512	-2.37122e-11	-6.86406e-12	-1.16065e-10
		0.01514	-2.12162e-11	-6.24006e-12	-1.16065e-10
		0.01516	-2.24642e-11	-6.86406e-12	-1.16065e-10
		0.01518	-2.24642e-11	-6.86406e-12	-1.14817e-10
		0.0152	-2.37122e-11	-6.86406e-12	-1.14193e-10
		0.01522	-2.49602e-11	-6.86406e-12	-1.14193e-10
		0.01524	-2.49602e-11	-4.99205e-12	-1.13569e-10
		0.01526	-2.49602e-11	-4.36804e-12	-1.11697e-10
		0.01528	-2.49602e-11	-4.36804e-12	-1.12321e-10
		0.0153	-2.62082e-11	-5.61605e-12	-1.11073e-10
		0.01532	-2.62082e-11	-4.99205e-12	-1.11073e-10
		0.01534	-2.43362e-11	-6.24006e-12	-1.11697e-10
		0.01536	-2.37122e-11	-7.48807e-12	-1.12321e-10
		0.01538	-2.37122e-11	-9.36009e-12	-1.11073e-10
		0.0154	-2.24642e-11	-1.06081e-11	-1.11073e-10
		0.01542	-2.24642e-11	-7.48807e-12	-1.09201e-10
		0.01544	-2.12162e-11	-8.73608e-12	-1.08577e-10
		0.01546	-2.12162e-11	-7.48807e-12	-1.09201e-10
		0.01548	-2.30882e-11	-6.24006e-12	-1.07953e-10
		0.0155	-2.12162e-11	-6.86406e-12	-1.07953e-10
		0.01552	-2.12162e-11	-6.24006e-12	-1.09201e-10
		0.01554	-2.30882e-11	-5.61605e-12	-1.11697e-10
		0.01556	-2.43362e-11	-5.61605e-12	-1.09825e-10
		0.01558	-2.43362e-11	-5.61605e-12	-1.10449e-10
		0.0156	-2.55842e-11	-7.48807e-12	-1.11697e-10
		0.01562	-2.55842e-11	-8.73608e-12	-1.11073e-10
		0.01564	-2.49602e-11	-1.06081e-11	-1.13569e-10
		0.01566	-2.49602e-11	-1.24801e-11	-1.14193e-10
		0.01568	-2.37122e-11	-1.24801e-11	-1.14817e-10
		0.0157	-2.24642e-11	-1.18561e-11	-1.16065e-10
		0.01572	-2.43362e-11	-1.12321e-11	-1.15441e-10
		0.01574	-2.30882e-11	-1.12321e-11	-1.14193e-10
		0.01576	-2.18402e-11	-9.98409e-12	-1.16065e-10
		0.01578	-2.30882e-11	-9.36009e-12	-1.13569e-10
		0.0158	-2.30882e-11	-8.73608e-12	-1.14193e-10
		0.01582	-2.43362e-11	-8.11208e-12	-1.12945e-10
		0.01584	-2.55842e-11	-5.61605e-12	-1.11697e-10
		0.01586	-2.68322e-11	-6.86406e-12	-1.11073e-10
		0.01588	-2.68322e-11	-6.86406e-12	-1.11073e-10
		0.0159	-2.62082e-11	-6.86406e-12	-1.09825e-10
		0.01592	-2.49602e-11	-6.86406e-12	-1.08577e-10
		0.01594	-2.37122e-11	-8.11208e-12	-1.09201e-10
		0.01596	-2.18402e-11	-9.36009e-12	-1.11697e-10
		0.01598	-2.12162e-11	-9.98409e-12	-1.14193e-10
		0.016	-2.12162e-11	-9.36009e-12	-1.15441e-10
		0.01602	-2.12162e-11	-8.73608e-12	-1.16689e-10
		0.01604	-1.99682e-11	-9.98409e-12	-1.17937e-10
		0.01606	-1.87202e-11	-9.36009e-12	-1.16065e-10
		0.01608	-1.80962e-11	-1.06081e-11	-1.14193e-10
		0.0161	-1.99682e-11	-9.98409e-12	-1.11073e-10
		0.01612	-1.99682e-11	-1.06081e-11	-1.11697e-10
		0.01614	-2.18402e-11	-9.36009e-12	-1.11073e-10
		0.01616	-2.24642e-11	-9.36009e-12	-1.13569e-10
		0.01618	-2.49602e-11	-6.86406e-12	-1.14193e-10
		0.0162	-2.55842e-11	-6.86406e-12	-1.16689e-10
		0.01622	-2.49602e-11	-4.99205e-12	-1.16689e-10
		0.01624	-2.49602e-11	-5.61605e-12	-1.14817e-10
		0.01626	-2.37122e-11	-6.86406e-12	-1.12945e-10
		0.01628	-2.30882e-11	-7.48807e-12	-1.11697e-10
		0.0163	-2.18402e-11	-8.73608e-12	-1.13569e-10
		0.01632	-2.18402e-11	-8.73608e-12	-1.16065e-10
		0.01634	-2.18402e-11	-9.36009e-12	-1.16689e-10
		0.01636	-2.05922e-11	-9.98409e-12	-1.17313e-10
		0.01638	-2.18402e-11	-8.73608e-12	-1.17313e-10
		0.0164	-2.12162e-11	-8.11208e-12	-1.15441e-10
		0.01642	-2.18402e-11	-1.06081e-11	-1.12321e-10
		0.01644	-2.05922e-11	-9.98409e-12	-1.11073e-10
		0.01646	-2.24642e-11	-1.18561e-11	-1.11073e-10
		0.01648	-2.18402e-11	-1.18561e-11	-1.11073e-10
		0.0165	-2.24642e-11	-1.31041e-11	-1.11697e-10
		0.01652	-2.43362e-11	-1.24801e-11	-1.12945e-10
		0.01654	-2.49602e-11	-1.24801e-11	-1.13569e-10
		0.01656	-2.30882e-11	-1.06081e-11	-1.12321e-10
		0.01658	-2.43362e-11	-8.73608e-12	-1.11697e-10
		0.0166	-2.43362e-11	-8.73608e-12	-1.09825e-10
		0.01662	-2.43362e-11	-8.11208e-12	-1.10449e-10
		0.01664	-2.49602e-11	-6.86406e-12	-1.11697e-10
		0.01666	-2.43362e-11	-8.11208e-12	-1.12945e-10
		0.01668	-2.30882e-11	-8.11208e-12	-1.14817e-10
		0.0167	-2.30882e-11	-8.11208e-12	-1.16689e-10
		0.01672	-2.18402e-11	-9.36009e-12	-1.14817e-10
		0.01674	-2.49602e-11	-9.98409e-12	-1.15441e-10
		0.01676	-2.37122e-11	-9.36009e-12	-1.16065e-10
		0.01678	-2.30882e-11	-9.98409e-12	-1.14193e-10
		0.0168	-2.49602e-11	-8.11208e-12	-1.15441e-10
		0.01682	-2.43362e-11	-7.48807e-12	-1.16065e-10
		0.01684	-2.43362e-11	-6.86406e-12	-1.16689e-10
		0.01686	-2.49602e-11	-6.86406e-12	-1.16689e-10
		0.01688	-2.49602e-11	-6.24006e-12	-1.16065e-10
		0.0169	-2.55842e-11	-7.48807e-12	-1.14817e-10
		0.01692	-2.55842e-11	-8.11208e-12	-1.14193e-10
		0.01694	-2.43362e-11	-7.48807e-12	-1.12321e-10
		0.01696	-2.43362e-11	-7.48807e-12	-1.12945e-10
		0.01698	-2.37122e-11	-9.36009e-12	-1.11697e-10
		0.017	-2.18402e-11	-9.36009e-12	-1.10449e-10
		0.01702	-2.05922e-11	-9.98409e-12	-1.09825e-10
		0.01704	-2.12162e-11	-9.36009e-12	-1.11073e-10
		0.01706	-1.99682e-11	-9.98409e-12	-1.08577e-10
		0.01708	-2.12162e-11	-9.98409e-12	-1.07953e-10
		0.0171	-2.05922e-11	-9.36009e-12	-1.07329e-10
		0.01712	-2.43362e-11	-8.11208e-12	-1.06705e-10
		0.01714	-2.18402e-11	-8.73608e-12	-1.07329e-10
		0.01716	-2.12162e-11	-7.48807e-12	-1.09201e-10
		0.01718	-2.18402e-11	-9.36009e-12	-1.11697e-10
		0.0172	-2.05922e-11	-8.11208e-12	-1.11697e-10
		0.01722	-2.18402e-11	-7.48807e-12	-1.14193e-10
		0.01724	-2.12162e-11	-7.48807e-12	-1.14193e-10
		0.01726	-1.99682e-11	-8.73608e-12	-1.11697e-10
		0.01728	-2.12162e-11	-7.48807e-12	-1.10449e-10
		0.0173	-2.12162e-11	-7.48807e-12	-1.11073e-10
		0.01732	-2.05922e-11	-8.11208e-12	-1.10449e-10
		0.01734	-2.12162e-11	-8.11208e-12	-1.11697e-10
		0.01736	-2.18402e-11	-9.98409e-12	-1.11073e-10
		0.01738	-2.05922e-11	-1.12321e-11	-1.12945e-10
		0.0174	-2.12162e-11	-1.12321e-11	-1.12945e-10
		0.01742	-2.12162e-11	-9.98409e-12	-1.13569e-10
		0.01744	-1.93442e-11	-1.06081e-11	-1.12945e-10
		0.01746	-1.99682e-11	-9.98409e-12	-1.12321e-10
		0.01748	-2.18402e-11	-8.73608e-12	-1.12321e-10
		0.0175	-2.05922e-11	-8.11208e-12	-1.13569e-10
		0.01752	-2.12162e-11	-7.48807e-12	-1.14817e-10
		0.01754	-1.99682e-11	-6.86406e-12	-1.14817e-10
		0.01756	-2.12162e-11	-6.24006e-12	-1.14817e-10
		0.01758	-2.18402e-11	-8.11208e-12	-1.16065e-10
		0.0176	-2.05922e-11	-6.86406e-12	-1.17313e-10
		0.01762	-2.24642e-11	-8.73608e-12	-1.17313e-10
		0.01764	-2.24642e-11	-8.73608e-12	-1.19809e-10
		0.01766	-2.37122e-11	-8.73608e-12	-1.21057e-10
		0.01768	-2.55842e-11	-8.73608e-12	-1.21681e-10
		0.0177	-2.49602e-11	-8.11208e-12	-1.19809e-10
		0.01772	-2.49602e-11	-6.24006e-12	-1.17937e-10
		0.01774	-2.68322e-11	-5.61605e-12	-1.14193e-10
		0.01776	-2.68322e-11	-5.61605e-12	-1.11697e-10
		0.01778	-2.49602e-11	-5.61605e-12	-1.10449e-10
		0.0178	-2.62082e-11	-5.61605e-12	-1.10449e-10
		0.01782	-2.37122e-11	-6.86406e-12	-1.12321e-10
		0.01784	-2.43362e-11	-8.11208e-12	-1.14817e-10
		0.01786	-2.24642e-11	-8.73608e-12	-1.14193e-10
		0.01788	-2.30882e-11	-8.11208e-12	-1.15441e-10
		0.0179	-2.12162e-11	-8.73608e-12	-1.15441e-10
		0.01792	-1.99682e-11	-8.73608e-12	-1.14193e-10
		0.01794	-2.05922e-11	-9.98409e-12	-1.12945e-10
		0.01796	-1.87202e-11	-8.11208e-12	-1.13569e-10
		0.01798	-1.99682e-11	-8.11208e-12	-1.15441e-10
		0.018	-1.93442e-11	-8.73608e-12	-1.15441e-10
		0.01802	-2.18402e-11	-8.73608e-12	-1.16689e-10
		0.01804	-2.18402e-11	-6.86406e-12	-1.17313e-10
		0.01806	-2.24642e-11	-5.61605e-12	-1.18561e-10
		0.01808	-2.24642e-11	-6.86406e-12	-1.16689e-10
		0.0181	-2.24642e-11	-6.86406e-12	-1.13569e-10
		0.01812	-2.37122e-11	-7.48807e-12	-1.12321e-10
		0.01814	-2.37122e-11	-8.11208e-12	-1.12945e-10
		0.01816	-2.37122e-11	-9.36009e-12	-1.11697e-10
		0.01818	-2.49602e-11	-8.11208e-12	-1.12321e-10
		0.0182	-2.37122e-11	-7.48807e-12	-1.12321e-10
		0.01822	-2.30882e-11	-8.73608e-12	-1.11697e-10
		0.01824	-2.24642e-11	-8.73608e-12	-1.12321e-10
		0.01826	-2.24642e-11	-8.73608e-12	-1.09201e-10
		0.01828	-2.18402e-11	-9.36009e-12	-1.09201e-10
		0.0183	-2.12162e-11	-9.36009e-12	-1.09825e-10
		0.01832	-2.12162e-11	-9.36009e-12	-1.09825e-10
		0.01834	-2.12162e-11	-8.11208e-12	-1.11073e-10
		0.01836	-2.12162e-11	-8.11208e-12	-1.12321e-10
		0.01838	-2.18402e-11	-9.36009e-12	-1.13569e-10
		0.0184	-1.99682e-11	-9.98409e-12	-1.11697e-10
		0.01842	-1.99682e-11	-1.12321e-11	-1.10449e-10
		0.01844	-1.93442e-11	-1.12321e-11	-1.09201e-10
		0.01846	-2.05922e-11	-1.18561e-11	-1.07953e-10
		0.01848	-2.12162e-11	-1.24801e-11	-1.09201e-10
		0.0185	-2.30882e-11	-1.12321e-11	-1.11073e-10
		0.01852	-2.37122e-11	-1.31041e-11	-1.13569e-10
		0.01854	-2.43362e-11	-1.12321e-11	-1.14193e-10
		0.01856	-2.30882e-11	-9.36009e-12	-1.14193e-10
		0.01858	-2.37122e-11	-9.36009e-12	-1.15441e-10
		0.0186	-2.24642e-11	-8.11208e-12	-1.15441e-10
		0.01862	-2.43362e-11	-8.11208e-12	-1.13569e-10
		0.01864	-2.37122e-11	-6.86406e-12	-1.14817e-10
		0.01866	-2.30882e-11	-6.86406e-12	-1.16065e-10
		0.01868	-2.43362e-11	-5.61605e-12	-1.18561e-10
		0.0187	-2.30882e-11	-4.99205e-12	-1.19185e-10
		0.01872	-2.12162e-11	-6.24006e-12	-1.19185e-10
		0.01874	-2.05922e-11	-8.73608e-12	-1.18561e-10
		0.01876	-2.12162e-11	-7.48807e-12	-1.17937e-10
		0.01878	-1.99682e-11	-8.11208e-12	-1.17937e-10
		0.0188	-2.18402e-11	-9.36009e-12	-1.16065e-10
		0.01882	-2.18402e-11	-9.98409e-12	-1.16689e-10
		0.01884	-2.37122e-11	-9.98409e-12	-1.16689e-10
		0.01886	-2.43362e-11	-9.98409e-12	-1.16689e-10
		0.01888	-2.37122e-11	-1.18561e-11	-1.15441e-10
		0.0189	-2.37122e-11	-1.12321e-11	-1.12321e-10
		0.01892	-2.18402e-11	-9.36009e-12	-1.12321e-10
		0.01894	-2.12162e-11	-8.11208e-12	-1.09825e-10
		0.01896	-2.24642e-11	-7.48807e-12	-1.09825e-10
		0.01898	-2.18402e-11	-6.24006e-12	-1.09825e-10
		0.019	-2.05922e-11	-8.11208e-12	-1.12321e-10
		0.01902	-2.18402e-11	-8.11208e-12	-1.12945e-10
		0.01904	-2.12162e-11	-8.11208e-12	-1.15441e-10
		0.01906	-2.12162e-11	-9.98409e-12	-1.14193e-10
		0.01908	-1.99682e-11	-1.24801e-11	-1.14817e-10
		0.0191	-2.05922e-11	-1.31041e-11	-1.14817e-10
		0.01912	-2.30882e-11	-1.37281e-11	-1.14817e-10
		0.01914	-2.24642e-11	-1.31041e-11	-1.15441e-10
		0.01916	-2.49602e-11	-1.18561e-11	-1.14817e-10
		0.01918	-2.30882e-11	-1.12321e-11	-1.12321e-10
		0.0192	-2.24642e-11	-8.73608e-12	-1.09825e-10
		0.01922	-2.18402e-11	-9.98409e-12	-1.11073e-10
		0.01924	-2.12162e-11	-8.11208e-12	-1.11073e-10
		0.01926	-2.18402e-11	-9.36009e-12	-1.11073e-10
		0.01928	-2.05922e-11	-8.73608e-12	-1.11697e-10
		0.0193	-2.05922e-11	-8.11208e-12	-1.13569e-10
		0.01932	-2.05922e-11	-9.98409e-12	-1.14193e-10
		0.01934	-2.18402e-11	-1.18561e-11	-1.16065e-10
		0.01936	-2.37122e-11	-1.12321e-11	-1.16065e-10
		0.01938	-2.49602e-11	-1.06081e-11	-1.16065e-10
		0.0194	-2.62082e-11	-8.73608e-12	-1.15441e-10
		0.01942	-2.49602e-11	-7.48807e-12	-1.14817e-10
		0.01944	-2.55842e-11	-7.48807e-12	-1.11073e-10
		0.01946	-2.24642e-11	-4.99205e-12	-1.10449e-10
		0.01948	-2.37122e-11	-5.61605e-12	-1.09825e-10
		0.0195	-2.12162e-11	-4.99205e-12	-1.09825e-10
		0.01952	-2.30882e-11	-6.24006e-12	-1.12945e-10
		0.01954	-2.12162e-11	-5.61605e-12	-1.14193e-10
		0.01956	-2.30882e-11	-7.48807e-12	-1.15441e-10
		0.01958	-2.30882e-11	-8.73608e-12	-1.14817e-10
		0.0196	-2.43362e-11	-8.73608e-12	-1.14817e-10
		0.01962	-2.43362e-11	-8.73608e-12	-1.14193e-10
		0.01964	-2.55842e-11	-8.73608e-12	-1.14817e-10
		0.01966	-2.55842e-11	-7.48807e-12	-1.15441e-10
		0.01968	-2.68322e-11	-7.48807e-12	-1.16065e-10
		0.0197	-2.49602e-11	-7.48807e-12	-1.16065e-10
		0.01972	-2.37122e-11	-7.48807e-12	-1.15441e-10
		0.01974	-2.55842e-11	-7.48807e-12	-1.14817e-10
		0.01976	-2.24642e-11	-9.98409e-12	-1.13569e-10
		0.01978	-2.24642e-11	-9.36009e-12	-1.11697e-10
		0.0198	-2.18402e-11	-9.36009e-12	-1.11697e-10
		0.01982	-2.12162e-11	-8.11208e-12	-1.11697e-10
		0.01984	-2.18402e-11	-6.24006e-12	-1.12321e-10
		0.01986	-2.05922e-11	-4.99205e-12	-1.11697e-10
		0.01988	-2.05922e-11	-6.24006e-12	-1.11073e-10
		0.0199	-2.18402e-11	-6.86406e-12	-1.10449e-10
		0.01992	-2.24642e-11	-6.24006e-12	-1.11073e-10
		0.01994	-1.99682e-11	-5.61605e-12	-1.11697e-10
		0.01996	-2.18402e-11	-4.36804e-12	-1.10449e-10
		0.01998	-2.24642e-11	-4.36804e-12	-1.11073e-10
		0.02	-2.24642e-11	-4.99205e-12	-1.10449e-10
		0.02002	-2.30882e-11	-7.48807e-12	-1.12321e-10
		0.02004	-2.24642e-11	-8.11208e-12	-1.12321e-10
		0.02006	-2.18402e-11	-9.36009e-12	-1.13569e-10
		0.02008	-2.18402e-11	-9.98409e-12	-1.11697e-10
		0.0201	-2.24642e-11	-1.06081e-11	-1.11073e-10
		0.02012	-2.12162e-11	-9.98409e-12	-1.11697e-10
		0.02014	-2.18402e-11	-9.98409e-12	-1.12321e-10
		0.02016	-2.18402e-11	-9.36009e-12	-1.15441e-10
		0.02018	-2.18402e-11	-9.98409e-12	-1.17313e-10
		0.0202	-2.18402e-11	-1.06081e-11	-1.18561e-10
		0.02022	-2.18402e-11	-1.18561e-11	-1.20433e-10
		0.02024	-2.43362e-11	-1.18561e-11	-1.20433e-10
		0.02026	-2.43362e-11	-1.12321e-11	-1.18561e-10
		0.02028	-2.55842e-11	-9.98409e-12	-1.18561e-10
		0.0203	-2.55842e-11	-9.36009e-12	-1.17937e-10
		0.02032	-2.37122e-11	-8.73608e-12	-1.17313e-10
		0.02034	-2.49602e-11	-8.73608e-12	-1.18561e-10
		0.02036	-2.49602e-11	-1.06081e-11	-1.17313e-10
		0.02038	-2.18402e-11	-9.36009e-12	-1.16065e-10
		0.0204	-2.24642e-11	-1.06081e-11	-1.14817e-10
		0.02042	-2.12162e-11	-9.36009e-12	-1.14193e-10
		0.02044	-1.99682e-11	-9.36009e-12	-1.14193e-10
		0.02046	-2.12162e-11	-9.36009e-12	-1.14817e-10
		0.02048	-2.05922e-11	-6.86406e-12	-1.14817e-10
		0.0205	-2.12162e-11	-8.73608e-12	-1.15441e-10
		0.02052	-2.05922e-11	-8.11208e-12	-1.15441e-10
		0.02054	-2.18402e-11	-7.48807e-12	-1.14817e-10
		0.02056	-1.93442e-11	-8.11208e-12	-1.13569e-10
		0.02058	-2.05922e-11	-7.48807e-12	-1.13569e-10
		0.0206	-2.05922e-11	-6.86406e-12	-1.11073e-10
		0.02062	-1.99682e-11	-6.86406e-12	-1.09825e-10
		0.02064	-2.05922e-11	-7.48807e-12	-1.11073e-10
		0.02066	-2.24642e-11	-8.11208e-12	-1.10449e-10
		0.02068	-2.30882e-11	-7.48807e-12	-1.12321e-10
		0.0207	-2.18402e-11	-9.36009e-12	-1.13569e-10
		0.02072	-2.12162e-11	-9.36009e-12	-1.13569e-10
		0.02074	-2.18402e-11	-9.36009e-12	-1.15441e-10
		0.02076	-2.12162e-11	-9.36009e-12	-1.15441e-10
		0.02078	-2.12162e-11	-9.36009e-12	-1.17313e-10
		0.0208	-2.18402e-11	-8.11208e-12	-1.17937e-10
		0.02082	-2.30882e-11	-8.11208e-12	-1.17937e-10
		0.02084	-2.37122e-11	-8.11208e-12	-1.17313e-10
		0.02086	-2.30882e-11	-8.11208e-12	-1.17313e-10
		0.02088	-2.30882e-11	-8.73608e-12	-1.15441e-10
		0.0209	-2.24642e-11	-6.86406e-12	-1.14817e-10
		0.02092	-2.12162e-11	-5.61605e-12	-1.11697e-10
		0.02094	-1.99682e-11	-4.99205e-12	-1.13569e-10
		0.02096	-2.12162e-11	-5.61605e-12	-1.12321e-10
		0.02098	-2.05922e-11	-5.61605e-12	-1.14817e-10
		0.021	-2.12162e-11	-5.61605e-12	-1.16689e-10
		0.02102	-2.18402e-11	-7.48807e-12	-1.17937e-10
		0.02104	-2.18402e-11	-6.24006e-12	-1.17937e-10
		0.02106	-2.37122e-11	-9.36009e-12	-1.14817e-10
		0.02108	-2.18402e-11	-1.12321e-11	-1.12321e-10
		0.0211	-2.05922e-11	-1.06081e-11	-1.09825e-10
		0.02112	-2.12162e-11	-9.36009e-12	-1.09201e-10
		0.02114	-2.18402e-11	-9.98409e-12	-1.06705e-10
		0.02116	-2.05922e-11	-1.06081e-11	-1.06081e-10
		0.02118	-2.05922e-11	-1.12321e-11	-1.07329e-10
		0.0212	-2.18402e-11	-9.36009e-12	-1.08577e-10
		0.02122	-2.18402e-11	-9.36009e-12	-1.06705e-10
		0.02124	-2.12162e-11	-1.06081e-11	-1.10449e-10
		0.02126	-2.05922e-11	-1.06081e-11	-1.09825e-10
		0.02128	-2.12162e-11	-1.06081e-11	-1.11073e-10
		0.0213	-2.18402e-11	-9.98409e-12	-1.12321e-10
		0.02132	-2.43362e-11	-1.18561e-11	-1.14817e-10
		0.02134	-2.49602e-11	-1.12321e-11	-1.17313e-10
		0.02136	-2.43362e-11	-1.12321e-11	-1.16065e-10
		0.02138	-2.37122e-11	-1.18561e-11	-1.15441e-10
		0.0214	-2.30882e-11	-1.06081e-11	-1.13569e-10
		0.02142	-2.18402e-11	-1.06081e-11	-1.12321e-10
		0.02144	-2.24642e-11	-7.48807e-12	-1.10449e-10
		0.02146	-2.12162e-11	-5.61605e-12	-1.10449e-10
		0.02148	-2.12162e-11	-5.61605e-12	-1.11697e-10
		0.0215	-2.18402e-11	-6.24006e-12	-1.11073e-10
		0.02152	-2.12162e-11	-7.48807e-12	-1.10449e-10
		0.02154	-2.30882e-11	-8.11208e-12	-1.10449e-10
		0.02156	-2.24642e-11	-1.06081e-11	-1.09825e-10
		0.02158	-2.24642e-11	-1.37281e-11	-1.08577e-10
		0.0216	-2.43362e-11	-1.18561e-11	-1.09201e-10
		0.02162	-2.49602e-11	-1.18561e-11	-1.09825e-10
		0.02164	-2.43362e-11	-1.12321e-11	-1.12945e-10
		0.02166	-2.37122e-11	-9.36009e-12	-1.14817e-10
		0.02168	-2.49602e-11	-9.98409e-12	-1.16065e-10
		0.0217	-2.43362e-11	-8.73608e-12	-1.15441e-10
		0.02172	-2.43362e-11	-9.36009e-12	-1.16689e-10
		0.02174	-2.30882e-11	-8.73608e-12	-1.15441e-10
		0.02176	-2.37122e-11	-9.98409e-12	-1.12321e-10
		0.02178	-2.37122e-11	-1.12321e-11	-1.09825e-10
		0.0218	-2.30882e-11	-1.24801e-11	-1.11073e-10
		0.02182	-2.18402e-11	-1.49761e-11	-1.08577e-10
		0.02184	-2.12162e-11	-1.49761e-11	-1.09201e-10
		0.02186	-2.12162e-11	-1.74722e-11	-1.09825e-10
		0.02188	-1.99682e-11	-1.74722e-11	-1.11073e-10
		0.0219	-1.99682e-11	-1.68482e-11	-1.12321e-10
		0.02192	-1.93442e-11	-1.62242e-11	-1.12321e-10
		0.02194	-1.93442e-11	-1.43521e-11	-1.12321e-10
		0.02196	-1.99682e-11	-1.43521e-11	-1.14193e-10
		0.02198	-1.80962e-11	-1.12321e-11	-1.14817e-10
		0.022	-1.87202e-11	-9.36009e-12	-1.16065e-10
		0.02202	-1.80962e-11	-9.36009e-12	-1.16065e-10
		0.02204	-1.87202e-11	-8.73608e-12	-1.14817e-10
		0.02206	-1.93442e-11	-9.36009e-12	-1.12321e-10
		0.02208	-1.99682e-11	-9.98409e-12	-1.10449e-10
		0.0221	-2.05922e-11	-9.98409e-12	-1.09201e-10
		0.02212	-2.05922e-11	-1.18561e-11	-1.07953e-10
		0.02214	-2.12162e-11	-9.98409e-12	-1.09825e-10
		0.02216	-2.18402e-11	-1.06081e-11	-1.11073e-10
		0.02218	-2.30882e-11	-1.06081e-11	-1.12321e-10
		0.0222	-2.37122e-11	-1.12321e-11	-1.13569e-10
		0.02222	-2.43362e-11	-9.98409e-12	-1.14193e-10
		0.02224	-2.55842e-11	-8.73608e-12	-1.14193e-10
		0.02226	-2.30882e-11	-9.36009e-12	-1.14193e-10
		0.02228	-2.49602e-11	-1.06081e-11	-1.14193e-10
		0.0223	-2.24642e-11	-9.36009e-12	-1.15441e-10
		0.02232	-2.37122e-11	-9.98409e-12	-1.16065e-10
		0.02234	-2.37122e-11	-1.06081e-11	-1.17313e-10
		0.02236	-2.37122e-11	-1.18561e-11	-1.19185e-10
		0.02238	-2.55842e-11	-1.12321e-11	-1.20433e-10
		0.0224	-2.49602e-11	-1.18561e-11	-1.18561e-10
		0.02242	-2.43362e-11	-1.12321e-11	-1.16689e-10
		0.02244	-2.12162e-11	-1.06081e-11	-1.14817e-10
		0.02246	-2.12162e-11	-9.98409e-12	-1.12945e-10
		0.02248	-2.18402e-11	-9.98409e-12	-1.12945e-10
		0.0225	-2.12162e-11	-9.36009e-12	-1.11073e-10
		0.02252	-2.12162e-11	-9.98409e-12	-1.11697e-10
		0.02254	-1.99682e-11	-8.11208e-12	-1.12321e-10
		0.02256	-2.12162e-11	-8.11208e-12	-1.11073e-10
		0.02258	-1.99682e-11	-6.86406e-12	-1.11697e-10
		0.0226	-2.05922e-11	-6.86406e-12	-1.11073e-10
		0.02262	-2.24642e-11	-6.86406e-12	-1.10449e-10
		0.02264	-2.37122e-11	-7.48807e-12	-1.10449e-10
		0.02266	-2.49602e-11	-5.61605e-12	-1.12321e-10
		0.02268	-2.55842e-11	-5.61605e-12	-1.12321e-10
		0.0227	-2.43362e-11	-5.61605e-12	-1.13569e-10
		0.02272	-2.30882e-11	-7.48807e-12	-1.15441e-10
		0.02274	-2.12162e-11	-5.61605e-12	-1.14193e-10
		0.02276	-2.12162e-11	-5.61605e-12	-1.14193e-10
		0.02278	-1.99682e-11	-2.49602e-12	-1.13569e-10
		0.0228	-2.12162e-11	-2.49602e-12	-1.12321e-10
		0.02282	-2.24642e-11	-4.99205e-12	-1.13569e-10
		0.02284	-2.12162e-11	-3.74404e-12	-1.14193e-10
		0.02286	-2.30882e-11	-5.61605e-12	-1.14817e-10
		0.02288	-2.24642e-11	-6.86406e-12	-1.16065e-10
		0.0229	-2.18402e-11	-7.48807e-12	-1.15441e-10
		0.02292	-2.05922e-11	-7.48807e-12	-1.14817e-10
		0.02294	-2.05922e-11	-7.48807e-12	-1.14817e-10
		0.02296	-2.05922e-11	-8.11208e-12	-1.13569e-10
		0.02298	-2.05922e-11	-6.86406e-12	-1.14193e-10
		0.023	-1.99682e-11	-7.48807e-12	-1.14817e-10
		0.02302	-1.99682e-11	-8.73608e-12	-1.13569e-10
		0.02304	-2.05922e-11	-9.36009e-12	-1.12321e-10
		0.02306	-1.93442e-11	-9.36009e-12	-1.12321e-10
		0.02308	-2.05922e-11	-8.73608e-12	-1.12321e-10
		0.0231	-1.99682e-11	-8.73608e-12	-1.11073e-10
		0.02312	-2.05922e-11	-8.73608e-12	-1.11697e-10
		0.02314	-2.12162e-11	-7.48807e-12	-1.11073e-10
		0.02316	-2.12162e-11	-8.11208e-12	-1.11073e-10
		0.02318	-2.37122e-11	-8.11208e-12	-1.11073e-10
		0.0232	-2.43362e-11	-8.73608e-12	-1.12321e-10
		0.02322	-2.55842e-11	-7.48807e-12	-1.11697e-10
		0.02324	-2.49602e-11	-7.48807e-12	-1.11697e-10
		0.02326	-2.43362e-11	-7.48807e-12	-1.12321e-10
		0.02328	-2.30882e-11	-7.48807e-12	-1.13569e-10
		0.0233	-2.24642e-11	-6.86406e-12	-1.12321e-10
		0.02332	-2.12162e-11	-8.11208e-12	-1.13569e-10
		0.02334	-2.12162e-11	-9.98409e-12	-1.14817e-10
		0.02336	-2.12162e-11	-9.98409e-12	-1.14193e-10
		0.02338	-2.18402e-11	-1.06081e-11	-1.14817e-10
		0.0234	-2.30882e-11	-9.36009e-12	-1.13569e-10
		0.02342	-2.37122e-11	-8.11208e-12	-1.12945e-10
		0.02344	-2.49602e-11	-6.24006e-12	-1.12321e-10
		0.02346	-2.37122e-11	-6.86406e-12	-1.13569e-10
		0.02348	-2.43362e-11	-8.11208e-12	-1.15441e-10
		0.0235	-2.30882e-11	-8.11208e-12	-1.16065e-10
		0.02352	-2.24642e-11	-7.48807e-12	-1.14817e-10
		0.02354	-2.24642e-11	-7.48807e-12	-1.15441e-10
		0.02356	-2.24642e-11	-7.48807e-12	-1.14193e-10
		0.02358	-2.05922e-11	-8.11208e-12	-1.12321e-10
		0.0236	-2.05922e-11	-6.86406e-12	-1.12945e-10
		0.02362	-2.24642e-11	-5.61605e-12	-1.13569e-10
		0.02364	-2.18402e-11	-6.24006e-12	-1.13569e-10
		0.02366	-2.43362e-11	-4.99205e-12	-1.14193e-10
		0.02368	-2.55842e-11	-4.99205e-12	-1.15441e-10
		0.0237	-2.62082e-11	-6.24006e-12	-1.17313e-10
		0.02372	-2.68322e-11	-6.86406e-12	-1.16065e-10
		0.02374	-2.62082e-11	-6.24006e-12	-1.16065e-10
		0.02376	-2.49602e-11	-6.86406e-12	-1.17313e-10
		0.02378	-2.55842e-11	-8.11208e-12	-1.15441e-10
		0.0238	-2.62082e-11	-8.11208e-12	-1.16065e-10
		0.02382	-2.49602e-11	-8.73608e-12	-1.14817e-10
		0.02384	-2.55842e-11	-9.36009e-12	-1.16065e-10
		0.02386	-2.49602e-11	-8.11208e-12	-1.15441e-10
		0.02388	-2.37122e-11	-8.11208e-12	-1.15441e-10
		0.0239	-2.37122e-11	-6.86406e-12	-1.14193e-10
		0.02392	-2.24642e-11	-6.86406e-12	-1.13569e-10
		0.02394	-2.24642e-11	-5.61605e-12	-1.13569e-10
		0.02396	-2.24642e-11	-6.24006e-12	-1.13569e-10
		0.02398	-2.24642e-11	-7.48807e-12	-1.14817e-10
		0.024	-2.18402e-11	-8.73608e-12	-1.15441e-10
		0.02402	-2.24642e-11	-8.73608e-12	-1.16065e-10
		0.02404	-2.18402e-11	-9.36009e-12	-1.14193e-10
		0.02406	-2.12162e-11	-9.36009e-12	-1.11697e-10
		0.02408	-2.05922e-11	-9.36009e-12	-1.11697e-10
		0.0241	-1.93442e-11	-8.73608e-12	-1.09201e-10
		0.02412	-2.18402e-11	-8.73608e-12	-1.09825e-10
		0.02414	-2.24642e-11	-8.73608e-12	-1.10449e-10
		0.02416	-2.43362e-11	-7.48807e-12	-1.12321e-10
		0.02418	-2.43362e-11	-8.73608e-12	-1.13569e-10
		0.0242	-2.43362e-11	-8.73608e-12	-1.15441e-10
		0.02422	-2.49602e-11	-8.73608e-12	-1.14817e-10
		0.02424	-2.43362e-11	-8.11208e-12	-1.15441e-10
		0.02426	-2.49602e-11	-7.48807e-12	-1.14817e-10
		0.02428	-2.62082e-11	-6.86406e-12	-1.12945e-10
		0.0243	-2.55842e-11	-5.61605e-12	-1.14817e-10
		0.02432	-2.55842e-11	-3.74404e-12	-1.16065e-10
		0.02434	-2.49602e-11	-3.74404e-12	-1.16689e-10
		0.02436	-2.24642e-11	-4.99205e-12	-1.16065e-10
		0.02438	-2.18402e-11	-4.99205e-12	-1.17313e-10
		0.0244	-2.12162e-11	-6.24006e-12	-1.14817e-10
		0.02442	-2.43362e-11	-6.86406e-12	-1.12321e-10
		0.02444	-2.30882e-11	-6.24006e-12	-1.10449e-10
		0.02446	-2.37122e-11	-7.48807e-12	-1.08577e-10
		0.02448	-2.37122e-11	-8.11208e-12	-1.09201e-10
		0.0245	-2.43362e-11	-8.11208e-12	-1.09201e-10
		0.02452	-2.43362e-11	-9.36009e-12	-1.11697e-10
		0.02454	-2.37122e-11	-8.73608e-12	-1.11073e-10
		0.02456	-2.24642e-11	-8.73608e-12	-1.12321e-10
		0.02458	-2.18402e-11	-8.11208e-12	-1.13569e-10
		0.0246	-2.05922e-11	-6.24006e-12	-1.12321e-10
		0.02462	-2.05922e-11	-4.99205e-12	-1.11697e-10
		0.02464	-1.99682e-11	-4.36804e-12	-1.11073e-10
		0.02466	-2.18402e-11	-4.99205e-12	-1.11697e-10
		0.02468	-2.24642e-11	-6.24006e-12	-1.13569e-10
		0.0247	-2.30882e-11	-4.99205e-12	-1.12321e-10
		0.02472	-2.24642e-11	-5.61605e-12	-1.12945e-10
		0.02474	-2.43362e-11	-5.61605e-12	-1.11073e-10
		0.02476	-2.43362e-11	-6.24006e-12	-1.10449e-10
		0.02478	-2.43362e-11	-7.48807e-12	-1.10449e-10
		0.0248	-2.30882e-11	-7.48807e-12	-1.09201e-10
		0.02482	-2.43362e-11	-8.11208e-12	-1.10449e-10
		0.02484	-2.37122e-11	-8.11208e-12	-1.11073e-10
		0.02486	-2.37122e-11	-7.48807e-12	-1.11697e-10
		0.02488	-2.24642e-11	-6.24006e-12	-1.11697e-10
		0.0249	-2.24642e-11	-7.48807e-12	-1.12945e-10
		0.02492	-2.18402e-11	-6.24006e-12	-1.12945e-10
		0.02494	-2.05922e-11	-5.61605e-12	-1.13569e-10
		0.02496	-2.12162e-11	-4.99205e-12	-1.09825e-10
		0.02498	-2.12162e-11	-4.99205e-12	-1.11073e-10
		0.025	-2.18402e-11	-4.99205e-12	-1.11697e-10
		0.02502	-2.12162e-11	-3.74404e-12	-1.11697e-10
		0.02504	-2.18402e-11	-4.99205e-12	-1.12321e-10
		0.02506	-2.12162e-11	-6.24006e-12	-1.12321e-10
		0.02508	-2.30882e-11	-6.24006e-12	-1.11697e-10
		0.0251	-2.43362e-11	-8.11208e-12	-1.11073e-10
		0.02512	-2.37122e-11	-8.11208e-12	-1.09825e-10
		0.02514	-2.37122e-11	-9.36009e-12	-1.09825e-10
		0.02516	-2.43362e-11	-8.11208e-12	-1.11073e-10
		0.02518	-2.24642e-11	-8.73608e-12	-1.11073e-10
		0.0252	-2.37122e-11	-7.48807e-12	-1.12321e-10
		0.02522	-2.55842e-11	-4.99205e-12	-1.14193e-10
		0.02524	-2.37122e-11	-5.61605e-12	-1.14817e-10
		0.02526	-2.37122e-11	-4.99205e-12	-1.15441e-10
		0.02528	-2.18402e-11	-5.61605e-12	-1.14817e-10
		0.0253	-2.18402e-11	-6.24006e-12	-1.15441e-10
		0.02532	-2.37122e-11	-6.86406e-12	-1.16065e-10
		0.02534	-2.37122e-11	-7.48807e-12	-1.13569e-10
		0.02536	-2.30882e-11	-1.06081e-11	-1.12321e-10
		0.02538	-2.30882e-11	-9.98409e-12	-1.10449e-10
		0.0254	-2.37122e-11	-9.98409e-12	-1.10449e-10
		0.02542	-2.12162e-11	-8.73608e-12	-1.10449e-10
		0.02544	-2.12162e-11	-5.61605e-12	-1.09825e-10
		0.02546	-2.24642e-11	-3.12003e-12	-1.11697e-10
		0.02548	-2.18402e-11	-2.49602e-12	-1.13569e-10
		0.0255	-2.12162e-11	-6.24006e-13	-1.15441e-10
		0.02552	-2.18402e-11	6.24006e-13	-1.17313e-10
		0.02554	-2.37122e-11	-6.24006e-13	-1.17937e-10
		0.02556	-2.43362e-11	-1.24801e-12	-1.17937e-10
		0.02558	-2.37122e-11	-6.24006e-13	-1.16065e-10
		0.0256	-2.43362e-11	-2.49602e-12	-1.14193e-10
		0.02562	-2.43362e-11	-6.24006e-12	-1.10449e-10
		0.02564	-2.43362e-11	-7.48807e-12	-1.10449e-10
		0.02566	-2.43362e-11	-9.98409e-12	-1.11697e-10
		0.02568	-2.30882e-11	-1.06081e-11	-1.11073e-10
		0.0257	-2.30882e-11	-9.98409e-12	-1.11697e-10
		0.02572	-2.37122e-11	-1.06081e-11	-1.12321e-10
		0.02574	-2.30882e-11	-8.11208e-12	-1.11697e-10
		0.02576	-2.37122e-11	-7.48807e-12	-1.11697e-10
		0.02578	-2.24642e-11	-6.86406e-12	-1.11073e-10
		0.0258	-2.12162e-11	-5.61605e-12	-1.13569e-10
		0.02582	-2.18402e-11	-6.24006e-12	-1.14817e-10
		0.02584	-2.18402e-11	-6.24006e-12	-1.14193e-10
		0.02586	-2.24642e-11	-6.24006e-12	-1.14193e-10
		0.02588	-2.30882e-11	-5.61605e-12	-1.13569e-10
		0.0259	-2.37122e-11	-6.24006e-12	-1.13569e-10
		0.02592	-2.37122e-11	-6.24006e-12	-1.09825e-10
		0.02594	-2.62082e-11	-6.24006e-12	-1.11073e-10
		0.02596	-2.37122e-11	-6.86406e-12	-1.09825e-10
		0.02598	-2.30882e-11	-8.11208e-12	-1.08577e-10
		0.026	-2.30882e-11	-8.11208e-12	-1.11073e-10
		0.02602	-2.43362e-11	-7.48807e-12	-1.13569e-10
		0.02604	-2.43362e-11	-8.11208e-12	-1.14817e-10
		0.02606	-2.24642e-11	-7.48807e-12	-1.14193e-10
		0.02608	-2.24642e-11	-8.11208e-12	-1.12945e-10
		0.0261	-2.24642e-11	-9.36009e-12	-1.12321e-10
		0.02612	-2.37122e-11	-8.73608e-12	-1.11073e-10
		0.02614	-2.37122e-11	-9.36009e-12	-1.09201e-10
		0.02616	-2.37122e-11	-7.48807e-12	-1.09201e-10
		0.02618	-2.24642e-11	-5.61605e-12	-1.09825e-10
		0.0262	-2.18402e-11	-6.86406e-12	-1.09201e-10
		0.02622	-2.12162e-11	-7.48807e-12	-1.11697e-10
		0.02624	-2.18402e-11	-8.73608e-12	-1.11073e-10
		0.02626	-2.05922e-11	-8.73608e-12	-1.11697e-10
		0.02628	-1.99682e-11	-8.73608e-12	-1.11073e-10
		0.0263	-2.18402e-11	-9.36009e-12	-1.12321e-10
		0.02632	-2.30882e-11	-8.11208e-12	-1.13569e-10
		0.02634	-2.43362e-11	-9.36009e-12	-1.11697e-10
		0.02636	-2.55842e-11	-9.98409e-12	-1.12321e-10
		0.02638	-2.62082e-11	-1.12321e-11	-1.12945e-10
		0.0264	-2.62082e-11	-8.11208e-12	-1.14193e-10
		0.02642	-2.68322e-11	-6.24006e-12	-1.14193e-10
		0.02644	-2.68322e-11	-3.12003e-12	-1.13569e-10
		0.02646	-2.74563e-11	-3.74404e-12	-1.14193e-10
		0.02648	-2.74563e-11	-2.49602e-12	-1.13569e-10
		0.0265	-2.68322e-11	-1.24801e-12	-1.13569e-10
		0.02652	-2.62082e-11	-1.87202e-12	-1.12945e-10
		0.02654	-2.55842e-11	-3.12003e-12	-1.12945e-10
		0.02656	-2.49602e-11	-6.24006e-12	-1.14193e-10
		0.02658	-2.37122e-11	-6.86406e-12	-1.14817e-10
		0.0266	-2.49602e-11	-8.73608e-12	-1.15441e-10
		0.02662	-2.49602e-11	-7.48807e-12	-1.15441e-10
		0.02664	-2.68322e-11	-8.11208e-12	-1.15441e-10
		0.02666	-2.68322e-11	-7.48807e-12	-1.14817e-10
		0.02668	-2.68322e-11	-6.24006e-12	-1.16065e-10
		0.0267	-2.80803e-11	-6.24006e-12	-1.14817e-10
		0.02672	-2.68322e-11	-6.86406e-12	-1.12945e-10
		0.02674	-2.74563e-11	-7.48807e-12	-1.14193e-10
		0.02676	-2.62082e-11	-8.73608e-12	-1.15441e-10
		0.02678	-2.30882e-11	-9.98409e-12	-1.15441e-10
		0.0268	-2.18402e-11	-1.12321e-11	-1.17313e-10
		0.02682	-1.99682e-11	-1.24801e-11	-1.16689e-10
		0.02684	-2.18402e-11	-1.06081e-11	-1.16065e-10
		0.02686	-1.99682e-11	-1.06081e-11	-1.14817e-10
		0.02688	-2.18402e-11	-8.11208e-12	-1.14817e-10
		0.0269	-2.12162e-11	-8.11208e-12	-1.14193e-10
		0.02692	-2.24642e-11	-3.74404e-12	-1.11697e-10
		0.02694	-2.12162e-11	-2.49602e-12	-1.11697e-10
		0.02696	-2.30882e-11	-1.87202e-12	-1.11697e-10
		0.02698	-2.30882e-11	-1.87202e-12	-1.12945e-10
		0.027	-2.24642e-11	-4.36804e-12	-1.15441e-10
		0.02702	-2.49602e-11	-3.74404e-12	-1.16689e-10
		0.02704	-2.49602e-11	-4.99205e-12	-1.16689e-10
		0.02706	-2.55842e-11	-4.99205e-12	-1.16065e-10
		0.02708	-2.49602e-11	-6.24006e-12	-1.15441e-10
		0.0271	-2.30882e-11	-6.86406e-12	-1.14193e-10
		0.02712	-2.30882e-11	-7.48807e-12	-1.12321e-10
		0.02714	-2.30882e-11	-8.73608e-12	-1.12321e-10
		0.02716	-2.37122e-11	-8.11208e-12	-1.11073e-10
		0.02718	-2.24642e-11	-9.36009e-12	-1.12945e-10
		0.0272	-2.24642e-11	-8.73608e-12	-1.13569e-10
		0.02722	-2.24642e-11	-8.11208e-12	-1.13569e-10
		0.02724	-2.55842e-11	-8.11208e-12	-1.12945e-10
		0.02726	-2.37122e-11	-6.86406e-12	-1.12945e-10
		0.02728	-2.49602e-11	-7.48807e-12	-1.12945e-10
		0.0273	-2.62082e-11	-7.48807e-12	-1.12945e-10
		0.02732	-2.68322e-11	-6.86406e-12	-1.14193e-10
		0.02734	-2.74563e-11	-7.48807e-12	-1.14817e-10
		0.02736	-2.74563e-11	-5.61605e-12	-1.15441e-10
		0.02738	-2.74563e-11	-5.61605e-12	-1.14817e-10
		0.0274	-2.68322e-11	-4.99205e-12	-1.14817e-10
		0.02742	-2.74563e-11	-4.36804e-12	-1.13569e-10
		0.02744	-2.68322e-11	-5.61605e-12	-1.13569e-10
		0.02746	-2.62082e-11	-6.86406e-12	-1.11697e-10
		0.02748	-2.62082e-11	-7.48807e-12	-1.11697e-10
		0.0275	-2.68322e-11	-7.48807e-12	-1.11697e-10
		0.02752	-2.62082e-11	-7.48807e-12	-1.12321e-10
		0.02754	-2.55842e-11	-8.11208e-12	-1.11697e-10
		0.02756	-2.55842e-11	-6.86406e-12	-1.10449e-10
		0.02758	-2.37122e-11	-6.86406e-12	-1.11697e-10
		0.0276	-2.18402e-11	-6.24006e-12	-1.12321e-10
		0.02762	-2.18402e-11	-6.86406e-12	-1.14817e-10
		0.02764	-2.12162e-11	-6.86406e-12	-1.16065e-10
		0.02766	-2.05922e-11	-6.86406e-12	-1.16065e-10
		0.02768	-2.05922e-11	-7.48807e-12	-1.16065e-10
		0.0277	-2.30882e-11	-8.11208e-12	-1.14817e-10
		0.02772	-2.37122e-11	-6.86406e-12	-1.14817e-10
		0.02774	-2.43362e-11	-7.48807e-12	-1.11697e-10
		0.02776	-2.37122e-11	-6.24006e-12	-1.13569e-10
		0.02778	-2.30882e-11	-6.24006e-12	-1.12945e-10
		0.0278	-2.24642e-11	-5.61605e-12	-1.14193e-10
		0.02782	-2.12162e-11	-5.61605e-12	-1.13569e-10
		0.02784	-2.05922e-11	-6.86406e-12	-1.15441e-10
		0.02786	-2.18402e-11	-7.48807e-12	-1.16065e-10
		0.02788	-2.24642e-11	-7.48807e-12	-1.14817e-10
		0.0279	-2.30882e-11	-8.11208e-12	-1.16065e-10
		0.02792	-2.55842e-11	-8.73608e-12	-1.13569e-10
		0.02794	-2.62082e-11	-8.73608e-12	-1.15441e-10
		0.02796	-2.55842e-11	-8.73608e-12	-1.13569e-10
		0.02798	-2.74563e-11	-9.36009e-12	-1.16065e-10
		0.028	-2.62082e-11	-6.86406e-12	-1.15441e-10
		0.02802	-2.55842e-11	-7.48807e-12	-1.15441e-10
		0.02804	-2.74563e-11	-6.86406e-12	-1.12321e-10
		0.02806	-2.87043e-11	-6.86406e-12	-1.12321e-10
		0.02808	-2.74563e-11	-6.86406e-12	-1.12321e-10
		0.0281	-2.68322e-11	-6.86406e-12	-1.11697e-10
		0.02812	-2.49602e-11	-6.24006e-12	-1.11697e-10
		0.02814	-2.55842e-11	-6.24006e-12	-1.12945e-10
		0.02816	-2.49602e-11	-6.24006e-12	-1.15441e-10
		0.02818	-2.49602e-11	-7.48807e-12	-1.16689e-10
		0.0282	-2.37122e-11	-8.11208e-12	-1.17313e-10
		0.02822	-2.43362e-11	-8.11208e-12	-1.16689e-10
		0.02824	-2.49602e-11	-7.48807e-12	-1.14817e-10
		0.02826	-2.49602e-11	-6.24006e-12	-1.13569e-10
		0.02828	-2.55842e-11	-4.99205e-12	-1.12945e-10
		0.0283	-2.55842e-11	-5.61605e-12	-1.13569e-10
		0.02832	-2.49602e-11	-3.74404e-12	-1.14817e-10
		0.02834	-2.62082e-11	-3.74404e-12	-1.13569e-10
		0.02836	-2.62082e-11	-4.99205e-12	-1.14817e-10
		0.02838	-2.74563e-11	-6.24006e-12	-1.14193e-10
		0.0284	-2.74563e-11	-8.11208e-12	-1.13569e-10
		0.02842	-2.80803e-11	-9.98409e-12	-1.11697e-10
		0.02844	-2.80803e-11	-1.18561e-11	-1.12945e-10
		0.02846	-2.55842e-11	-1.24801e-11	-1.12945e-10
		0.02848	-2.62082e-11	-1.31041e-11	-1.12321e-10
		0.0285	-2.43362e-11	-1.24801e-11	-1.13569e-10
		0.02852	-2.43362e-11	-1.31041e-11	-1.13569e-10
		0.02854	-2.43362e-11	-1.31041e-11	-1.14193e-10
		0.02856	-2.37122e-11	-1.12321e-11	-1.14817e-10
		0.02858	-2.49602e-11	-1.12321e-11	-1.14817e-10
		0.0286	-2.49602e-11	-1.06081e-11	-1.12945e-10
		0.02862	-2.55842e-11	-1.06081e-11	-1.11697e-10
		0.02864	-2.68322e-11	-1.06081e-11	-1.11073e-10
		0.02866	-2.80803e-11	-8.73608e-12	-1.11697e-10
		0.02868	-2.74563e-11	-9.36009e-12	-1.13569e-10
		0.0287	-2.93283e-11	-8.11208e-12	-1.14193e-10
		0.02872	-2.93283e-11	-8.11208e-12	-1.12321e-10
		0.02874	-2.99523e-11	-6.86406e-12	-1.13569e-10
		0.02876	-2.87043e-11	-5.61605e-12	-1.12945e-10
		0.02878	-2.87043e-11	-5.61605e-12	-1.12945e-10
		0.0288	-2.68322e-11	-6.86406e-12	-1.15441e-10
		0.02882	-2.55842e-11	-6.24006e-12	-1.15441e-10
		0.02884	-2.37122e-11	-6.24006e-12	-1.17313e-10
		0.02886	-2.24642e-11	-6.24006e-12	-1.16065e-10
		0.02888	-2.18402e-11	-6.86406e-12	-1.16689e-10
		0.0289	-2.18402e-11	-6.24006e-12	-1.14817e-10
		0.02892	-2.30882e-11	-6.24006e-12	-1.14193e-10
		0.02894	-2.12162e-11	-4.99205e-12	-1.14817e-10
		0.02896	-2.30882e-11	-5.61605e-12	-1.14193e-10
		0.02898	-2.49602e-11	-6.24006e-12	-1.14817e-10
		0.029	-2.43362e-11	-6.86406e-12	-1.16689e-10
		0.02902	-2.37122e-11	-8.11208e-12	-1.16689e-10
		0.02904	-2.30882e-11	-8.11208e-12	-1.15441e-10
		0.02906	-2.18402e-11	-7.48807e-12	-1.15441e-10
		0.02908	-2.05922e-11	-8.73608e-12	-1.14817e-10
		0.0291	-1.93442e-11	-7.48807e-12	-1.12945e-10
		0.02912	-2.05922e-11	-7.48807e-12	-1.11697e-10
		0.02914	-2.12162e-11	-8.11208e-12	-1.12945e-10
		0.02916	-2.24642e-11	-9.98409e-12	-1.12321e-10
		0.02918	-2.37122e-11	-9.98409e-12	-1.11073e-10
		0.0292	-2.43362e-11	-1.12321e-11	-1.11697e-10
		0.02922	-2.55842e-11	-1.12321e-11	-1.11073e-10
		0.02924	-2.49602e-11	-1.06081e-11	-1.12321e-10
		0.02926	-2.62082e-11	-9.36009e-12	-1.11697e-10
		0.02928	-2.55842e-11	-8.11208e-12	-1.12945e-10
		0.0293	-2.74563e-11	-7.48807e-12	-1.13569e-10
		0.02932	-2.68322e-11	-7.48807e-12	-1.14193e-10
		0.02934	-2.49602e-11	-8.73608e-12	-1.16065e-10
		0.02936	-2.49602e-11	-9.98409e-12	-1.17313e-10
		0.02938	-2.55842e-11	-1.06081e-11	-1.17937e-10
		0.0294	-2.43362e-11	-1.06081e-11	-1.16689e-10
		0.02942	-2.30882e-11	-1.18561e-11	-1.16689e-10
		0.02944	-2.30882e-11	-1.18561e-11	-1.15441e-10
		0.02946	-2.18402e-11	-1.06081e-11	-1.13569e-10
		0.02948	-2.12162e-11	-9.98409e-12	-1.13569e-10
		0.0295	-2.12162e-11	-9.98409e-12	-1.14193e-10
		0.02952	-2.18402e-11	-9.36009e-12	-1.15441e-10
		0.02954	-2.18402e-11	-9.36009e-12	-1.14193e-10
		0.02956	-2.24642e-11	-9.98409e-12	-1.14193e-10
		0.02958	-2.43362e-11	-9.36009e-12	-1.12945e-10
		0.0296	-2.49602e-11	-7.48807e-12	-1.10449e-10
		0.02962	-2.62082e-11	-8.73608e-12	-1.09825e-10
		0.02964	-2.62082e-11	-6.86406e-12	-1.12321e-10
		0.02966	-2.55842e-11	-4.99205e-12	-1.11073e-10
		0.02968	-2.55842e-11	-4.99205e-12	-1.11697e-10
		0.0297	-2.62082e-11	-4.99205e-12	-1.11697e-10
		0.02972	-2.49602e-11	-4.99205e-12	-1.10449e-10
		0.02974	-2.55842e-11	-3.12003e-12	-1.11073e-10
		0.02976	-2.49602e-11	-4.36804e-12	-1.11697e-10
		0.02978	-2.49602e-11	-4.99205e-12	-1.12321e-10
		0.0298	-2.55842e-11	-6.86406e-12	-1.14193e-10
		0.02982	-2.37122e-11	-6.86406e-12	-1.14193e-10
		0.02984	-2.24642e-11	-8.11208e-12	-1.12945e-10
		0.02986	-2.37122e-11	-7.48807e-12	-1.12945e-10
		0.02988	-2.18402e-11	-8.11208e-12	-1.12945e-10
		0.0299	-2.43362e-11	-9.36009e-12	-1.14193e-10
		0.02992	-2.18402e-11	-9.98409e-12	-1.12945e-10
		0.02994	-2.18402e-11	-9.36009e-12	-1.13569e-10
		0.02996	-2.24642e-11	-8.11208e-12	-1.12945e-10
		0.02998	-2.37122e-11	-7.48807e-12	-1.12321e-10
		0.03	-2.37122e-11	-5.61605e-12	-1.12321e-10
		0.03002	-2.49602e-11	-4.36804e-12	-1.11697e-10
		0.03004	-2.37122e-11	-4.99205e-12	-1.11073e-10
		0.03006	-2.43362e-11	-4.36804e-12	-1.12321e-10
		0.03008	-2.49602e-11	-4.99205e-12	-1.11073e-10
		0.0301	-2.49602e-11	-4.36804e-12	-1.12321e-10
		0.03012	-2.55842e-11	-4.99205e-12	-1.12945e-10
		0.03014	-2.62082e-11	-5.61605e-12	-1.12945e-10
		0.03016	-2.55842e-11	-6.86406e-12	-1.14817e-10
		0.03018	-2.68322e-11	-5.61605e-12	-1.15441e-10
		0.0302	-2.74563e-11	-4.99205e-12	-1.16065e-10
		0.03022	-2.68322e-11	-6.24006e-12	-1.16689e-10
		0.03024	-2.74563e-11	-5.61605e-12	-1.16065e-10
		0.03026	-2.80803e-11	-5.61605e-12	-1.11697e-10
		0.03028	-2.80803e-11	-8.11208e-12	-1.11697e-10
		0.0303	-2.68322e-11	-8.73608e-12	-1.09201e-10
		0.03032	-2.80803e-11	-7.48807e-12	-1.08577e-10
		0.03034	-2.74563e-11	-8.11208e-12	-1.11073e-10
		0.03036	-2.74563e-11	-6.86406e-12	-1.11073e-10
		0.03038	-2.55842e-11	-7.48807e-12	-1.13569e-10
		0.0304	-2.37122e-11	-6.24006e-12	-1.12321e-10
		0.03042	-2.37122e-11	-6.86406e-12	-1.12945e-10
		0.03044	-2.24642e-11	-6.86406e-12	-1.14193e-10
		0.03046	-2.18402e-11	-7.48807e-12	-1.12945e-10
		0.03048	-2.24642e-11	-6.24006e-12	-1.15441e-10
		0.0305	-2.12162e-11	-6.86406e-12	-1.14817e-10
		0.03052	-2.18402e-11	-7.48807e-12	-1.14193e-10
		0.03054	-2.49602e-11	-7.48807e-12	-1.13569e-10
		0.03056	-2.49602e-11	-7.48807e-12	-1.09825e-10
		0.03058	-2.62082e-11	-8.11208e-12	-1.09825e-10
		0.0306	-2.62082e-11	-7.48807e-12	-1.09825e-10
		0.03062	-2.62082e-11	-8.11208e-12	-1.12321e-10
		0.03064	-2.62082e-11	-7.48807e-12	-1.14193e-10
		0.03066	-2.49602e-11	-5.61605e-12	-1.15441e-10
		0.03068	-2.24642e-11	-6.24006e-12	-1.16065e-10
		0.0307	-2.30882e-11	-4.99205e-12	-1.17313e-10
		0.03072	-2.18402e-11	-3.74404e-12	-1.16689e-10
		0.03074	-2.18402e-11	-1.87202e-12	-1.14817e-10
		0.03076	-2.18402e-11	-2.49602e-12	-1.14817e-10
		0.03078	-2.43362e-11	-3.74404e-12	-1.12321e-10
		0.0308	-2.49602e-11	-5.61605e-12	-1.12321e-10
		0.03082	-2.43362e-11	-4.99205e-12	-1.11697e-10
		0.03084	-2.55842e-11	-8.11208e-12	-1.11073e-10
		0.03086	-2.49602e-11	-8.11208e-12	-1.14193e-10
		0.03088	-2.43362e-11	-8.73608e-12	-1.11697e-10
		0.0309	-2.30882e-11	-9.36009e-12	-1.11697e-10
		0.03092	-2.43362e-11	-9.36009e-12	-1.11697e-10
		0.03094	-2.43362e-11	-7.48807e-12	-1.13569e-10
		0.03096	-2.37122e-11	-8.11208e-12	-1.15441e-10
		0.03098	-2.30882e-11	-8.11208e-12	-1.17313e-10
		0.031	-2.37122e-11	-8.11208e-12	-1.17313e-10
		0.03102	-2.37122e-11	-1.06081e-11	-1.17937e-10
		0.03104	-2.18402e-11	-9.98409e-12	-1.17937e-10
		0.03106	-2.18402e-11	-9.98409e-12	-1.16689e-10
		0.03108	-2.24642e-11	-9.98409e-12	-1.14193e-10
		0.0311	-2.18402e-11	-8.11208e-12	-1.14817e-10
		0.03112	-2.05922e-11	-6.86406e-12	-1.14193e-10
		0.03114	-2.05922e-11	-6.24006e-12	-1.12321e-10
		0.03116	-2.05922e-11	-4.36804e-12	-1.14817e-10
		0.03118	-2.37122e-11	-3.74404e-12	-1.12321e-10
		0.0312	-2.30882e-11	-2.49602e-12	-1.13569e-10
		0.03122	-2.37122e-11	-3.12003e-12	-1.11697e-10
		0.03124	-2.24642e-11	-4.99205e-12	-1.10449e-10
		0.03126	-2.49602e-11	-5.61605e-12	-1.10449e-10
		0.03128	-2.24642e-11	-6.24006e-12	-1.11073e-10
		0.0313	-2.49602e-11	-7.48807e-12	-1.09201e-10
		0.03132	-2.55842e-11	-7.48807e-12	-1.12321e-10
		0.03134	-2.55842e-11	-8.73608e-12	-1.12945e-10
		0.03136	-2.49602e-11	-8.11208e-12	-1.14817e-10
		0.03138	-2.49602e-11	-8.73608e-12	-1.14193e-10
		0.0314	-2.30882e-11	-9.36009e-12	-1.14193e-10
		0.03142	-2.37122e-11	-1.06081e-11	-1.14817e-10
		0.03144	-2.18402e-11	-1.06081e-11	-1.16065e-10
		0.03146	-2.30882e-11	-9.98409e-12	-1.17313e-10
		0.03148	-2.24642e-11	-1.18561e-11	-1.17937e-10
		0.0315	-2.43362e-11	-1.06081e-11	-1.19185e-10
		0.03152	-2.55842e-11	-1.06081e-11	-1.17937e-10
		0.03154	-2.49602e-11	-1.12321e-11	-1.15441e-10
		0.03156	-2.49602e-11	-1.06081e-11	-1.13569e-10
		0.03158	-2.49602e-11	-1.06081e-11	-1.11697e-10
		0.0316	-2.49602e-11	-9.36009e-12	-1.11697e-10
		0.03162	-2.30882e-11	-8.11208e-12	-1.11697e-10
		0.03164	-2.30882e-11	-8.11208e-12	-1.12321e-10
		0.03166	-2.24642e-11	-7.48807e-12	-1.15441e-10
		0.03168	-2.43362e-11	-8.11208e-12	-1.17313e-10
		0.0317	-2.37122e-11	-8.73608e-12	-1.16065e-10
		0.03172	-2.37122e-11	-8.73608e-12	-1.15441e-10
		0.03174	-2.43362e-11	-8.11208e-12	-1.14817e-10
		0.03176	-2.43362e-11	-8.11208e-12	-1.13569e-10
		0.03178	-2.43362e-11	-6.24006e-12	-1.11073e-10
		0.0318	-2.37122e-11	-7.48807e-12	-1.12321e-10
		0.03182	-2.37122e-11	-8.11208e-12	-1.12945e-10
		0.03184	-2.43362e-11	-6.86406e-12	-1.12321e-10
		0.03186	-2.30882e-11	-8.11208e-12	-1.14193e-10
		0.03188	-2.24642e-11	-9.98409e-12	-1.12321e-10
		0.0319	-2.37122e-11	-8.11208e-12	-1.14193e-10
		0.03192	-2.37122e-11	-8.11208e-12	-1.14817e-10
		0.03194	-2.43362e-11	-8.11208e-12	-1.15441e-10
		0.03196	-2.43362e-11	-8.73608e-12	-1.14817e-10
		0.03198	-2.30882e-11	-8.11208e-12	-1.14817e-10
		0.032	-2.37122e-11	-9.36009e-12	-1.14817e-10
		0.03202	-2.37122e-11	-9.98409e-12	-1.11073e-10
		0.03204	-2.43362e-11	-1.18561e-11	-1.11073e-10
		0.03206	-2.43362e-11	-1.12321e-11	-1.11073e-10
		0.03208	-2.55842e-11	-9.98409e-12	-1.09825e-10
		0.0321	-2.74563e-11	-9.36009e-12	-1.11073e-10
		0.03212	-2.62082e-11	-6.24006e-12	-1.11697e-10
		0.03214	-2.62082e-11	-6.86406e-12	-1.12321e-10
		0.03216	-2.74563e-11	-5.61605e-12	-1.14817e-10
		0.03218	-2.49602e-11	-6.86406e-12	-1.15441e-10
		0.0322	-2.43362e-11	-4.99205e-12	-1.14817e-10
		0.03222	-2.24642e-11	-5.61605e-12	-1.16689e-10
		0.03224	-2.18402e-11	-6.24006e-12	-1.14193e-10
		0.03226	-2.18402e-11	-6.86406e-12	-1.12945e-10
		0.03228	-2.18402e-11	-8.11208e-12	-1.11697e-10
		0.0323	-2.05922e-11	-6.86406e-12	-1.11073e-10
		0.03232	-2.24642e-11	-8.73608e-12	-1.11073e-10
		0.03234	-2.18402e-11	-8.73608e-12	-1.08577e-10
		0.03236	-2.05922e-11	-1.06081e-11	-1.08577e-10
		0.03238	-2.12162e-11	-1.18561e-11	-1.09201e-10
		0.0324	-2.24642e-11	-1.18561e-11	-1.10449e-10
		0.03242	-2.18402e-11	-1.12321e-11	-1.10449e-10
		0.03244	-2.05922e-11	-9.36009e-12	-1.10449e-10
		0.03246	-2.18402e-11	-7.48807e-12	-1.11697e-10
		0.03248	-2.43362e-11	-6.24006e-12	-1.15441e-10
		0.0325	-2.49602e-11	-6.24006e-12	-1.15441e-10
		0.03252	-2.55842e-11	-6.24006e-12	-1.16689e-10
		0.03254	-2.68322e-11	-7.48807e-12	-1.17313e-10
		0.03256	-2.68322e-11	-8.11208e-12	-1.16065e-10
		0.03258	-2.74563e-11	-8.11208e-12	-1.12321e-10
		0.0326	-2.68322e-11	-6.24006e-12	-1.11697e-10
		0.03262	-2.74563e-11	-8.11208e-12	-1.11073e-10
		0.03264	-2.62082e-11	-6.86406e-12	-1.11697e-10
		0.03266	-2.55842e-11	-6.86406e-12	-1.14193e-10
		0.03268	-2.43362e-11	-6.86406e-12	-1.14193e-10
		0.0327	-2.43362e-11	-6.24006e-12	-1.14193e-10
		0.03272	-2.37122e-11	-6.24006e-12	-1.11697e-10
		0.03274	-2.37122e-11	-7.48807e-12	-1.09201e-10
		0.03276	-2.24642e-11	-6.24006e-12	-1.09201e-10
		0.03278	-2.30882e-11	-6.86406e-12	-1.08577e-10
		0.0328	-2.37122e-11	-6.86406e-12	-1.10449e-10
		0.03282	-2.37122e-11	-5.61605e-12	-1.12945e-10
		0.03284	-2.43362e-11	-6.86406e-12	-1.17313e-10
		0.03286	-2.62082e-11	-7.48807e-12	-1.17937e-10
		0.03288	-2.55842e-11	-6.86406e-12	-1.20433e-10
		0.0329	-2.43362e-11	-8.73608e-12	-1.19809e-10
		0.03292	-2.55842e-11	-6.86406e-12	-1.19809e-10
		0.03294	-2.37122e-11	-6.86406e-12	-1.17937e-10
		0.03296	-2.43362e-11	-6.86406e-12	-1.17313e-10
		0.03298	-2.24642e-11	-6.86406e-12	-1.19185e-10
		0.033	-2.37122e-11	-8.73608e-12	-1.19185e-10
		0.03302	-2.30882e-11	-9.98409e-12	-1.18561e-10
		0.03304	-2.43362e-11	-1.18561e-11	-1.18561e-10
		0.03306	-2.62082e-11	-1.12321e-11	-1.17313e-10
		0.03308	-2.80803e-11	-9.98409e-12	-1.14193e-10
		0.0331	-2.80803e-11	-9.36009e-12	-1.12945e-10
		0.03312	-2.93283e-11	-9.98409e-12	-1.13569e-10
		0.03314	-2.80803e-11	-7.48807e-12	-1.14193e-10
		0.03316	-2.87043e-11	-7.48807e-12	-1.13569e-10
		0.03318	-2.93283e-11	-9.36009e-12	-1.13569e-10
		0.0332	-2.74563e-11	-1.06081e-11	-1.13569e-10
		0.03322	-2.68322e-11	-1.12321e-11	-1.12945e-10
		0.03324	-2.49602e-11	-9.98409e-12	-1.11697e-10
		0.03326	-2.49602e-11	-9.98409e-12	-1.11073e-10
		0.03328	-2.68322e-11	-9.98409e-12	-1.09825e-10
		0.0333	-2.68322e-11	-9.98409e-12	-1.10449e-10
		0.03332	-2.55842e-11	-8.11208e-12	-1.11697e-10
		0.03334	-2.68322e-11	-8.73608e-12	-1.14193e-10
		0.03336	-2.62082e-11	-8.73608e-12	-1.14193e-10
		0.03338	-2.62082e-11	-9.36009e-12	-1.13569e-10
		0.0334	-2.62082e-11	-9.36009e-12	-1.13569e-10
		0.03342	-2.37122e-11	-9.36009e-12	-1.12321e-10
		0.03344	-2.37122e-11	-8.11208e-12	-1.12321e-10
		0.03346	-2.18402e-11	-7.48807e-12	-1.12945e-10
		0.03348	-2.05922e-11	-6.86406e-12	-1.13569e-10
		0.0335	-2.05922e-11	-4.99205e-12	-1.16689e-10
		0.03352	-1.99682e-11	-5.61605e-12	-1.19185e-10
		0.03354	-2.24642e-11	-4.99205e-12	-1.21681e-10
		0.03356	-2.24642e-11	-4.99205e-12	-1.22305e-10
		0.03358	-2.37122e-11	-7.48807e-12	-1.22929e-10
		0.0336	-2.24642e-11	-8.73608e-12	-1.19809e-10
		0.03362	-2.43362e-11	-1.12321e-11	-1.18561e-10
		0.03364	-2.30882e-11	-1.49761e-11	-1.15441e-10
		0.03366	-2.30882e-11	-1.37281e-11	-1.14817e-10
		0.03368	-2.49602e-11	-1.24801e-11	-1.15441e-10
		0.0337	-2.30882e-11	-1.12321e-11	-1.15441e-10
		0.03372	-2.24642e-11	-9.98409e-12	-1.12945e-10
		0.03374	-2.37122e-11	-9.98409e-12	-1.11697e-10
		0.03376	-2.24642e-11	-8.73608e-12	-1.08577e-10
		0.03378	-2.30882e-11	-8.73608e-12	-1.07329e-10
		0.0338	-2.24642e-11	-8.11208e-12	-1.06705e-10
		0.03382	-2.37122e-11	-7.48807e-12	-1.07329e-10
		0.03384	-2.49602e-11	-6.86406e-12	-1.08577e-10
		0.03386	-2.43362e-11	-6.86406e-12	-1.11697e-10
		0.03388	-2.24642e-11	-7.48807e-12	-1.12321e-10
		0.0339	-2.37122e-11	-8.11208e-12	-1.12321e-10
		0.03392	-2.24642e-11	-7.48807e-12	-1.11697e-10
		0.03394	-2.37122e-11	-8.11208e-12	-1.11697e-10
		0.03396	-2.49602e-11	-6.86406e-12	-1.09201e-10
		0.03398	-2.49602e-11	-8.11208e-12	-1.10449e-10
		0.034	-2.55842e-11	-5.61605e-12	-1.09201e-10
		0.03402	-2.55842e-11	-4.99205e-12	-1.11697e-10
		0.03404	-2.55842e-11	-6.24006e-12	-1.13569e-10
		0.03406	-2.49602e-11	-6.86406e-12	-1.14193e-10
		0.03408	-2.49602e-11	-7.48807e-12	-1.15441e-10
		0.0341	-2.18402e-11	-8.11208e-12	-1.13569e-10
		0.03412	-2.18402e-11	-8.73608e-12	-1.13569e-10
		0.03414	-2.18402e-11	-8.73608e-12	-1.14817e-10
		0.03416	-2.37122e-11	-8.73608e-12	-1.15441e-10
		0.03418	-2.37122e-11	-9.98409e-12	-1.15441e-10
		0.0342	-2.37122e-11	-9.98409e-12	-1.17313e-10
		0.03422	-2.37122e-11	-9.98409e-12	-1.16065e-10
		0.03424	-2.43362e-11	-1.06081e-11	-1.15441e-10
		0.03426	-2.30882e-11	-1.06081e-11	-1.15441e-10
		0.03428	-2.43362e-11	-9.98409e-12	-1.14817e-10
		0.0343	-2.37122e-11	-8.11208e-12	-1.14193e-10
		0.03432	-2.37122e-11	-6.86406e-12	-1.14817e-10
		0.03434	-2.37122e-11	-7.48807e-12	-1.14817e-10
		0.03436	-2.62082e-11	-6.24006e-12	-1.16065e-10
		0.03438	-2.37122e-11	-7.48807e-12	-1.16689e-10
		0.0344	-2.37122e-11	-8.11208e-12	-1.15441e-10
		0.03442	-2.43362e-11	-9.98409e-12	-1.17313e-10
		0.03444	-2.30882e-11	-1.12321e-11	-1.16689e-10
		0.03446	-2.49602e-11	-1.12321e-11	-1.16065e-10
		0.03448	-2.43362e-11	-1.18561e-11	-1.16689e-10
		0.0345	-2.30882e-11	-1.31041e-11	-1.16065e-10
		0.03452	-2.24642e-11	-1.18561e-11	-1.17937e-10
		0.03454	-2.37122e-11	-1.18561e-11	-1.15441e-10
		0.03456	-2.24642e-11	-9.98409e-12	-1.14817e-10
		0.03458	-2.12162e-11	-1.12321e-11	-1.14193e-10
		0.0346	-2.12162e-11	-1.18561e-11	-1.13569e-10
		0.03462	-2.18402e-11	-8.73608e-12	-1.15441e-10
		0.03464	-2.12162e-11	-8.73608e-12	-1.13569e-10
		0.03466	-1.99682e-11	-7.48807e-12	-1.14817e-10
		0.03468	-2.37122e-11	-8.11208e-12	-1.15441e-10
		0.0347	-2.24642e-11	-7.48807e-12	-1.13569e-10
		0.03472	-2.55842e-11	-8.11208e-12	-1.10449e-10
		0.03474	-2.62082e-11	-8.11208e-12	-1.12321e-10
		0.03476	-2.55842e-11	-8.73608e-12	-1.11073e-10
		0.03478	-2.68322e-11	-9.98409e-12	-1.11697e-10
		0.0348	-2.62082e-11	-9.36009e-12	-1.12321e-10
		0.03482	-2.74563e-11	-9.36009e-12	-1.13569e-10
		0.03484	-2.62082e-11	-9.98409e-12	-1.13569e-10
		0.03486	-2.49602e-11	-1.12321e-11	-1.14193e-10
		0.03488	-2.37122e-11	-1.12321e-11	-1.12945e-10
		0.0349	-2.18402e-11	-1.24801e-11	-1.11073e-10
		0.03492	-2.18402e-11	-1.31041e-11	-1.09825e-10
		0.03494	-2.05922e-11	-1.18561e-11	-1.09825e-10
		0.03496	-1.99682e-11	-1.12321e-11	-1.09825e-10
		0.03498	-1.99682e-11	-1.06081e-11	-1.11697e-10
		0.035	-2.18402e-11	-9.36009e-12	-1.15441e-10
		0.03502	-2.24642e-11	-9.36009e-12	-1.15441e-10
		0.03504	-2.43362e-11	-7.48807e-12	-1.16065e-10
		0.03506	-2.24642e-11	-6.86406e-12	-1.14817e-10
		0.03508	-2.43362e-11	-6.24006e-12	-1.13569e-10
		0.0351	-2.30882e-11	-4.99205e-12	-1.10449e-10
		0.03512	-2.30882e-11	-6.24006e-12	-1.10449e-10
		0.03514	-2.43362e-11	-7.48807e-12	-1.09825e-10
		0.03516	-2.49602e-11	-9.36009e-12	-1.12945e-10
		0.03518	-2.55842e-11	-9.36009e-12	-1.15441e-10
		0.0352	-2.55842e-11	-1.06081e-11	-1.14817e-10
		0.03522	-2.49602e-11	-1.06081e-11	-1.14193e-10
		0.03524	-2.30882e-11	-1.12321e-11	-1.12945e-10
		0.03526	-2.18402e-11	-1.18561e-11	-1.11697e-10
		0.03528	-2.05922e-11	-1.12321e-11	-1.09201e-10
		0.0353	-2.12162e-11	-1.24801e-11	-1.09201e-10
		0.03532	-2.12162e-11	-1.12321e-11	-1.09825e-10
		0.03534	-1.99682e-11	-1.06081e-11	-1.09825e-10
		0.03536	-1.93442e-11	-1.06081e-11	-1.12321e-10
		0.03538	-1.87202e-11	-9.36009e-12	-1.11073e-10
		0.0354	-1.93442e-11	-8.73608e-12	-1.09825e-10
		0.03542	-1.93442e-11	-7.48807e-12	-1.10449e-10
		0.03544	-1.93442e-11	-7.48807e-12	-1.10449e-10
		0.03546	-2.12162e-11	-7.48807e-12	-1.11697e-10
		0.03548	-2.30882e-11	-8.11208e-12	-1.11697e-10
		0.0355	-2.12162e-11	-8.73608e-12	-1.13569e-10
		0.03552	-2.18402e-11	-9.98409e-12	-1.17313e-10
		0.03554	-2.37122e-11	-1.06081e-11	-1.17937e-10
		0.03556	-2.24642e-11	-1.06081e-11	-1.19185e-10
		0.03558	-2.12162e-11	-1.06081e-11	-1.17937e-10
		0.0356	-2.18402e-11	-9.98409e-12	-1.16065e-10
		0.03562	-2.12162e-11	-9.98409e-12	-1.14817e-10
		0.03564	-2.12162e-11	-9.98409e-12	-1.14193e-10
		0.03566	-2.05922e-11	-9.98409e-12	-1.12321e-10
		0.03568	-1.93442e-11	-9.98409e-12	-1.13569e-10
		0.0357	-1.99682e-11	-8.73608e-12	-1.14193e-10
		0.03572	-1.99682e-11	-1.18561e-11	-1.12321e-10
		0.03574	-2.18402e-11	-1.12321e-11	-1.12321e-10
		0.03576	-2.12162e-11	-1.12321e-11	-1.13569e-10
		0.03578	-2.18402e-11	-9.98409e-12	-1.13569e-10
		0.0358	-2.18402e-11	-1.06081e-11	-1.13569e-10
		0.03582	-2.24642e-11	-1.06081e-11	-1.14193e-10
		0.03584	-2.43362e-11	-9.98409e-12	-1.16689e-10
		0.03586	-2.30882e-11	-9.98409e-12	-1.15441e-10
		0.03588	-2.24642e-11	-9.98409e-12	-1.16065e-10
		0.0359	-2.18402e-11	-9.98409e-12	-1.15441e-10
		0.03592	-1.99682e-11	-9.36009e-12	-1.15441e-10
		0.03594	-1.99682e-11	-1.06081e-11	-1.15441e-10
		0.03596	-1.87202e-11	-1.31041e-11	-1.12945e-10
		0.03598	-2.05922e-11	-1.12321e-11	-1.12945e-10
		0.036	-2.12162e-11	-1.31041e-11	-1.11697e-10
		0.03602	-2.24642e-11	-1.12321e-11	-1.12321e-10
		0.03604	-2.24642e-11	-1.12321e-11	-1.11697e-10
		0.03606	-2.12162e-11	-9.36009e-12	-1.12321e-10
		0.03608	-2.18402e-11	-9.36009e-12	-1.11697e-10
		0.0361	-2.12162e-11	-6.24006e-12	-1.12321e-10
		0.03612	-2.05922e-11	-7.48807e-12	-1.11697e-10
		0.03614	-2.05922e-11	-6.24006e-12	-1.12321e-10
		0.03616	-2.05922e-11	-6.24006e-12	-1.14193e-10
		0.03618	-2.12162e-11	-8.11208e-12	-1.14817e-10
		0.0362	-2.24642e-11	-7.48807e-12	-1.15441e-10
		0.03622	-2.24642e-11	-8.11208e-12	-1.14817e-10
		0.03624	-2.30882e-11	-8.73608e-12	-1.12321e-10
		0.03626	-2.43362e-11	-8.11208e-12	-1.11073e-10
		0.03628	-2.43362e-11	-9.36009e-12	-1.08577e-10
		0.0363	-2.37122e-11	-9.98409e-12	-1.09825e-10
		0.03632	-2.37122e-11	-9.98409e-12	-1.11073e-10
		0.03634	-2.37122e-11	-1.06081e-11	-1.14193e-10
		0.03636	-2.37122e-11	-1.06081e-11	-1.13569e-10
		0.03638	-2.37122e-11	-1.18561e-11	-1.14817e-10
		0.0364	-2.30882e-11	-9.98409e-12	-1.15441e-10
		0.03642	-2.18402e-11	-9.98409e-12	-1.14817e-10
		0.03644	-2.05922e-11	-9.98409e-12	-1.15441e-10
		0.03646	-1.99682e-11	-9.98409e-12	-1.15441e-10
		0.03648	-2.05922e-11	-9.36009e-12	-1.14817e-10
		0.0365	-1.99682e-11	-1.18561e-11	-1.16065e-10
		0.03652	-2.18402e-11	-9.98409e-12	-1.16065e-10
		0.03654	-2.18402e-11	-1.12321e-11	-1.13569e-10
		0.03656	-2.18402e-11	-9.36009e-12	-1.12321e-10
		0.03658	-2.30882e-11	-9.36009e-12	-1.11073e-10
		0.0366	-2.05922e-11	-8.11208e-12	-1.08577e-10
		0.03662	-1.99682e-11	-7.48807e-12	-1.07329e-10
		0.03664	-1.80962e-11	-4.99205e-12	-1.07329e-10
		0.03666	-1.80962e-11	-4.36804e-12	-1.09201e-10
		0.03668	-1.87202e-11	-3.12003e-12	-1.11697e-10
		0.0367	-1.87202e-11	-5.61605e-12	-1.11073e-10
		0.03672	-1.99682e-11	-4.99205e-12	-1.12945e-10
		0.03674	-2.30882e-11	-3.74404e-12	-1.12321e-10
		0.03676	-2.24642e-11	-4.36804e-12	-1.12945e-10
		0.03678	-2.49602e-11	-5.61605e-12	-1.12321e-10
		0.0368	-2.49602e-11	-6.24006e-12	-1.14193e-10
		0.03682	-2.55842e-11	-6.24006e-12	-1.11073e-10
		0.03684	-2.62082e-11	-8.11208e-12	-1.14193e-10
		0.03686	-2.49602e-11	-7.48807e-12	-1.13569e-10
		0.03688	-2.55842e-11	-7.48807e-12	-1.12321e-10
		0.0369	-2.49602e-11	-8.11208e-12	-1.12321e-10
		0.03692	-2.24642e-11	-6.24006e-12	-1.10449e-10
		0.03694	-2.12162e-11	-6.86406e-12	-1.11073e-10
		0.03696	-1.93442e-11	-8.11208e-12	-1.11073e-10
		0.03698	-1.99682e-11	-7.48807e-12	-1.12945e-10
		0.037	-1.93442e-11	-8.73608e-12	-1.13569e-10
		0.03702	-1.99682e-11	-9.98409e-12	-1.15441e-10
		0.03704	-2.05922e-11	-8.11208e-12	-1.17313e-10
		0.03706	-2.12162e-11	-8.73608e-12	-1.16689e-10
		0.03708	-2.12162e-11	-8.73608e-12	-1.15441e-10
		0.0371	-2.18402e-11	-7.48807e-12	-1.14193e-10
		0.03712	-2.30882e-11	-6.86406e-12	-1.11697e-10
		0.03714	-2.55842e-11	-7.48807e-12	-1.11697e-10
		0.03716	-2.55842e-11	-6.86406e-12	-1.11073e-10
		0.03718	-2.62082e-11	-7.48807e-12	-1.12321e-10
		0.0372	-2.43362e-11	-7.48807e-12	-1.11697e-10
		0.03722	-2.43362e-11	-8.73608e-12	-1.12321e-10
		0.03724	-2.30882e-11	-8.11208e-12	-1.11073e-10
		0.03726	-2.24642e-11	-8.73608e-12	-1.11697e-10
		0.03728	-2.05922e-11	-7.48807e-12	-1.09825e-10
		0.0373	-2.18402e-11	-8.11208e-12	-1.11073e-10
		0.03732	-2.24642e-11	-9.36009e-12	-1.12321e-10
		0.03734	-2.24642e-11	-1.06081e-11	-1.13569e-10
		0.03736	-2.30882e-11	-1.06081e-11	-1.14193e-10
		0.03738	-2.37122e-11	-1.18561e-11	-1.15441e-10
		0.0374	-2.37122e-11	-1.06081e-11	-1.14817e-10
		0.03742	-2.37122e-11	-1.06081e-11	-1.14193e-10
		0.03744	-2.55842e-11	-9.98409e-12	-1.14817e-10
		0.03746	-2.24642e-11	-9.36009e-12	-1.14193e-10
		0.03748	-2.18402e-11	-8.73608e-12	-1.15441e-10
		0.0375	-2.24642e-11	-8.11208e-12	-1.16689e-10
		0.03752	-2.18402e-11	-6.86406e-12	-1.15441e-10
		0.03754	-2.18402e-11	-3.74404e-12	-1.14817e-10
		0.03756	-2.30882e-11	-3.74404e-12	-1.12945e-10
		0.03758	-2.24642e-11	-4.36804e-12	-1.11697e-10
		0.0376	-2.24642e-11	-4.99205e-12	-1.10449e-10
		0.03762	-2.24642e-11	-4.36804e-12	-1.09201e-10
		0.03764	-2.24642e-11	-5.61605e-12	-1.09201e-10
		0.03766	-2.12162e-11	-6.24006e-12	-1.11697e-10
		0.03768	-2.24642e-11	-9.36009e-12	-1.14817e-10
		0.0377	-2.18402e-11	-8.73608e-12	-1.14817e-10
		0.03772	-2.12162e-11	-9.36009e-12	-1.14817e-10
		0.03774	-2.18402e-11	-1.18561e-11	-1.14193e-10
		0.03776	-2.12162e-11	-9.36009e-12	-1.12945e-10
		0.03778	-2.18402e-11	-9.36009e-12	-1.12945e-10
		0.0378	-2.30882e-11	-8.73608e-12	-1.09825e-10
		0.03782	-2.30882e-11	-8.73608e-12	-1.09825e-10
		0.03784	-2.24642e-11	-9.36009e-12	-1.09825e-10
		0.03786	-2.37122e-11	-9.98409e-12	-1.12321e-10
		0.03788	-2.24642e-11	-9.98409e-12	-1.10449e-10
		0.0379	-2.18402e-11	-1.06081e-11	-1.09201e-10
		0.03792	-2.24642e-11	-1.12321e-11	-1.09825e-10
		0.03794	-2.12162e-11	-1.18561e-11	-1.07953e-10
		0.03796	-2.37122e-11	-1.18561e-11	-1.09825e-10
		0.03798	-2.24642e-11	-1.24801e-11	-1.10449e-10
		0.038	-2.24642e-11	-1.06081e-11	-1.11697e-10
		0.03802	-2.24642e-11	-1.06081e-11	-1.12321e-10
		0.03804	-2.24642e-11	-1.06081e-11	-1.12321e-10
		0.03806	-2.18402e-11	-9.98409e-12	-1.13569e-10
		0.03808	-2.24642e-11	-9.36009e-12	-1.12321e-10
		0.0381	-2.24642e-11	-9.36009e-12	-1.14193e-10
		0.03812	-2.37122e-11	-8.73608e-12	-1.14193e-10
		0.03814	-2.37122e-11	-8.73608e-12	-1.12945e-10
		0.03816	-2.43362e-11	-9.36009e-12	-1.12945e-10
		0.03818	-2.37122e-11	-9.36009e-12	-1.13569e-10
		0.0382	-2.37122e-11	-8.73608e-12	-1.12945e-10
		0.03822	-2.30882e-11	-9.36009e-12	-1.14193e-10
		0.03824	-2.24642e-11	-8.73608e-12	-1.11697e-10
		0.03826	-2.37122e-11	-1.12321e-11	-1.12321e-10
		0.03828	-2.37122e-11	-1.06081e-11	-1.10449e-10
		0.0383	-2.43362e-11	-1.06081e-11	-1.11073e-10
		0.03832	-2.55842e-11	-1.06081e-11	-1.12321e-10
		0.03834	-2.43362e-11	-1.12321e-11	-1.12321e-10
		0.03836	-2.24642e-11	-1.12321e-11	-1.14817e-10
		0.03838	-2.18402e-11	-8.73608e-12	-1.14193e-10
		0.0384	-2.05922e-11	-9.36009e-12	-1.16065e-10
		0.03842	-1.93442e-11	-7.48807e-12	-1.14193e-10
		0.03844	-1.87202e-11	-7.48807e-12	-1.14817e-10
		0.03846	-1.93442e-11	-5.61605e-12	-1.12321e-10
		0.03848	-1.93442e-11	-5.61605e-12	-1.11697e-10
		0.0385	-1.80962e-11	-6.24006e-12	-1.11697e-10
		0.03852	-1.93442e-11	-6.86406e-12	-1.10449e-10
		0.03854	-1.93442e-11	-8.11208e-12	-1.10449e-10
		0.03856	-1.99682e-11	-9.36009e-12	-1.12321e-10
		0.03858	-2.05922e-11	-1.06081e-11	-1.12321e-10
		0.0386	-2.18402e-11	-9.98409e-12	-1.13569e-10
		0.03862	-2.24642e-11	-1.12321e-11	-1.13569e-10
		0.03864	-2.24642e-11	-1.06081e-11	-1.14193e-10
		0.03866	-2.24642e-11	-1.12321e-11	-1.14193e-10
		0.03868	-2.05922e-11	-8.73608e-12	-1.14817e-10
		0.0387	-2.18402e-11	-7.48807e-12	-1.16065e-10
		0.03872	-2.05922e-11	-6.24006e-12	-1.16065e-10
		0.03874	-2.05922e-11	-6.86406e-12	-1.16065e-10
		0.03876	-2.12162e-11	-8.11208e-12	-1.16065e-10
		0.03878	-2.24642e-11	-8.11208e-12	-1.15441e-10
		0.0388	-2.24642e-11	-9.98409e-12	-1.14817e-10
		0.03882	-2.24642e-11	-9.36009e-12	-1.15441e-10
		0.03884	-2.37122e-11	-1.06081e-11	-1.11697e-10
		0.03886	-2.37122e-11	-8.73608e-12	-1.11073e-10
		0.03888	-2.43362e-11	-7.48807e-12	-1.11697e-10
		0.0389	-2.43362e-11	-6.86406e-12	-1.09825e-10
		0.03892	-2.24642e-11	-6.86406e-12	-1.11697e-10
		0.03894	-2.37122e-11	-6.24006e-12	-1.09825e-10
		0.03896	-2.37122e-11	-6.86406e-12	-1.11697e-10
		0.03898	-2.49602e-11	-6.86406e-12	-1.12321e-10
		0.039	-2.43362e-11	-8.11208e-12	-1.11697e-10
		0.03902	-2.49602e-11	-8.73608e-12	-1.13569e-10
		0.03904	-2.43362e-11	-1.06081e-11	-1.12321e-10
		0.03906	-2.37122e-11	-9.98409e-12	-1.12321e-10
		0.03908	-2.43362e-11	-1.12321e-11	-1.14193e-10
		0.0391	-2.18402e-11	-9.98409e-12	-1.12321e-10
		0.03912	-2.18402e-11	-8.73608e-12	-1.14817e-10
		0.03914	-2.24642e-11	-8.73608e-12	-1.14817e-10
		0.03916	-2.30882e-11	-8.73608e-12	-1.14193e-10
		0.03918	-2.18402e-11	-9.36009e-12	-1.14817e-10
		0.0392	-2.30882e-11	-8.73608e-12	-1.16065e-10
		0.03922	-2.12162e-11	-9.36009e-12	-1.14817e-10
		0.03924	-2.24642e-11	-7.48807e-12	-1.14817e-10
		0.03926	-2.24642e-11	-8.11208e-12	-1.14193e-10
		0.03928	-2.37122e-11	-7.48807e-12	-1.12321e-10
		0.0393	-2.37122e-11	-7.48807e-12	-1.13569e-10
		0.03932	-2.37122e-11	-7.48807e-12	-1.13569e-10
		0.03934	-2.49602e-11	-6.86406e-12	-1.14817e-10
		0.03936	-2.55842e-11	-5.61605e-12	-1.15441e-10
		0.03938	-2.62082e-11	-5.61605e-12	-1.16065e-10
		0.0394	-2.62082e-11	-5.61605e-12	-1.14817e-10
		0.03942	-2.37122e-11	-6.24006e-12	-1.12945e-10
		0.03944	-2.30882e-11	-6.24006e-12	-1.11073e-10
		0.03946	-2.18402e-11	-8.11208e-12	-1.10449e-10
		0.03948	-2.05922e-11	-6.86406e-12	-1.09825e-10
		0.0395	-2.05922e-11	-7.48807e-12	-1.08577e-10
		0.03952	-1.99682e-11	-9.98409e-12	-1.09201e-10
		0.03954	-1.93442e-11	-9.98409e-12	-1.09201e-10
		0.03956	-2.05922e-11	-9.36009e-12	-1.07953e-10
		0.03958	-2.05922e-11	-9.36009e-12	-1.09201e-10
		0.0396	-1.93442e-11	-8.73608e-12	-1.09201e-10
		0.03962	-2.05922e-11	-1.06081e-11	-1.09201e-10
		0.03964	-1.93442e-11	-1.06081e-11	-1.09825e-10
		0.03966	-1.99682e-11	-9.98409e-12	-1.11073e-10
		0.03968	-2.24642e-11	-1.06081e-11	-1.11073e-10
		0.0397	-2.18402e-11	-9.36009e-12	-1.12321e-10
		0.03972	-2.18402e-11	-8.73608e-12	-1.13569e-10
		0.03974	-2.12162e-11	-6.24006e-12	-1.14193e-10
		0.03976	-2.12162e-11	-6.24006e-12	-1.12321e-10
		0.03978	-2.18402e-11	-5.61605e-12	-1.13569e-10
		0.0398	-2.18402e-11	-4.99205e-12	-1.13569e-10
		0.03982	-2.24642e-11	-3.74404e-12	-1.15441e-10
		0.03984	-2.30882e-11	-4.99205e-12	-1.16065e-10
		0.03986	-2.18402e-11	-4.36804e-12	-1.16065e-10
		0.03988	-2.43362e-11	-5.61605e-12	-1.17313e-10
		0.0399	-2.43362e-11	-4.99205e-12	-1.14817e-10
		0.03992	-2.49602e-11	-6.86406e-12	-1.13569e-10
[truncated: 28,303 more rows]
