# Supplementary material for: Physiological roles of endocytosis and presynaptic scaffold in vesicle replenishment at fast and slow central synapses
Source: eLife. 2024 Jun 3;12:RP90497. doi: 10.7554/eLife.90497 (PMC11147502; doi:10.7554/eLife.90497)
Supplement: Figure 2—figure supplement 3—source data 1. [file elife-90497-fig2-figsupp3-data1.xlsx]

## Sheet: 100 Hz, PT, 2 Ca2+_Panel A
		Panel A1_sample EPSC traces					Panel A1_normalized EPSC amplitude vs stimulation (#)								Panel A1_average depression at EPSCs (#26-30)					Panel A2_normalized recovery from STD vs time interval (s)
		Time (s)	Control	Dynasore	Pitstop-2		Stimulation (#)	Control		Dynasore		Pitstop-2				Control	Dynasore	Pitstop-2		Time interval (s)	Control		Dynasore		Pitstop-2
								Mean	SEM	Mean	SEM	Mean	SEM		Mean	0.32	0.227	0.23			Mean	SEM	Mean	SEM	Mean	SEM
		0	-1.74722e-11	-6.61446e-11	-1.29871e-09		1	1	0	1	0	1	0		SEM	0.02	0.02	0.018		0.02	0.03	0.04	0.03	0.02	0.06	0.01
		2e-05	-1.56001e-11	-6.92646e-11	-1.2962e-09		2	0.761015	0.01982	0.648206	0.0383497	0.613018	0.0176916		n number	16	9	11		0.1	0.36	0.06	0.24	0.02	0.28	0.04
		4e-05	-1.68482e-11	-7.05127e-11	-1.29182e-09		3	0.573607	0.0188227	0.47723	0.0274982	0.468274	0.0224189		p-value	--	0.003	0.002		0.3	0.49	0.08	0.38	0.05	0.46	0.03
		6e-05	-1.49761e-11	-6.98887e-11	-1.28806e-09		4	0.493164	0.0215203	0.410467	0.0340449	0.37633	0.0172573							1	0.67	0.08	0.61	0.04	0.68	0.03
		8e-05	-1.56001e-11	-6.86406e-11	-1.28743e-09		5	0.436344	0.024584	0.365521	0.027476	0.324266	0.0116694							3	0.9	0.02	0.84	0.04	0.91	0.01
		0.0001	-1.43521e-11	-6.86406e-11	-1.2868e-09		6	0.410231	0.0132378	0.344635	0.0283864	0.310525	0.0169042							8	0.94	0.02	0.97	0.01	0.95	0.02
		0.00012	-1.49761e-11	-6.73926e-11	-1.28806e-09		7	0.373094	0.0164758	0.304926	0.0222452	0.297521	0.0160712							12	0.94	0.03	1.01	0.04	1	0.01
		0.00014	-1.68482e-11	-6.67686e-11	-1.28743e-09		8	0.360884	0.0173073	0.309248	0.0278391	0.265252	0.0126207							20	0.94	0.02	1.01	0.01	0.99	0.04
		0.00016	-1.56001e-11	-6.48966e-11	-1.28994e-09		9	0.349693	0.0203486	0.254934	0.0210896	0.265575	0.0152446
		0.00018	-1.56001e-11	-6.48966e-11	-1.29182e-09		10	0.342688	0.0209994	0.27486	0.0242052	0.239369	0.0174666
		0.0002	-1.43521e-11	-6.36486e-11	-1.2937e-09		11	0.331577	0.0191319	0.234591	0.0243248	0.218535	0.0153955
		0.00022	-1.37281e-11	-6.11526e-11	-1.29432e-09		12	0.331262	0.0207866	0.225929	0.0216893	0.231367	0.0163876
		0.00024	-1.12321e-11	-6.17766e-11	-1.29934e-09		13	0.316939	0.021625	0.241086	0.023597	0.234774	0.0147505
		0.00026	-1.06081e-11	-6.05286e-11	-1.30122e-09		14	0.31319	0.0233206	0.22641	0.0224423	0.237623	0.0205778
		0.00028	-1.06081e-11	-5.92806e-11	-1.30498e-09		15	0.309862	0.0219979	0.216835	0.0211216	0.240661	0.0166536
		0.0003	-1.12321e-11	-5.80325e-11	-1.30749e-09		16	0.327082	0.0207924	0.230888	0.0178653	0.22167	0.0168424
		0.00032	-1.43521e-11	-6.05286e-11	-1.30811e-09		17	0.31378	0.0217717	0.230152	0.0172757	0.23734	0.0153275
		0.00034	-1.62242e-11	-6.11526e-11	-1.30811e-09		18	0.313584	0.0217319	0.224651	0.0228313	0.225359	0.0185089
		0.00036	-1.87202e-11	-6.30246e-11	-1.30561e-09		19	0.321833	0.0156913	0.230318	0.022892	0.244596	0.0177041
		0.00038	-1.74722e-11	-6.30246e-11	-1.30435e-09		20	0.320791	0.0173136	0.232974	0.0212015	0.234793	0.0156354
		0.0004	-1.68482e-11	-6.36486e-11	-1.30185e-09		21	0.322698	0.0210711	0.228153	0.0196316	0.240992	0.017041
		0.00042	-1.74722e-11	-6.42726e-11	-1.30122e-09		22	0.322967	0.0226746	0.228159	0.0215687	0.232686	0.0172315
		0.00044	-1.56001e-11	-6.42726e-11	-1.30122e-09		23	0.319487	0.0183637	0.243012	0.0209763	0.232555	0.0145765
		0.00046	-1.43521e-11	-6.48966e-11	-1.30059e-09		24	0.308858	0.018789	0.218828	0.0251211	0.239596	0.0167793
		0.00048	-1.49761e-11	-6.48966e-11	-1.29997e-09		25	0.319336	0.0202178	0.219203	0.0230887	0.235334	0.0164767
		0.0005	-1.62242e-11	-6.36486e-11	-1.29997e-09		26	0.317002	0.0168427	0.237005	0.028091	0.229811	0.0199422
		0.00052	-1.62242e-11	-6.36486e-11	-1.29934e-09		27	0.317088	0.0189123	0.226444	0.0222323	0.228739	0.0161984
		0.00054	-1.74722e-11	-6.11526e-11	-1.30185e-09		28	0.33258	0.0217752	0.241644	0.0223908	0.222885	0.0183772
		0.00056	-1.68482e-11	-5.99046e-11	-1.30373e-09		29	0.319416	0.018473	0.205741	0.0161633	0.24492	0.021678
		0.00058	-1.62242e-11	-5.80325e-11	-1.30686e-09		30	0.308497	0.0167398	0.225419	0.0199321	0.237512	0.0169996
		0.0006	-1.62242e-11	-5.86565e-11	-1.30811e-09
		0.00062	-1.56001e-11	-5.55365e-11	-1.30749e-09
		0.00064	-1.62242e-11	-5.61605e-11	-1.30623e-09
		0.00066	-1.68482e-11	-5.74085e-11	-1.30373e-09
		0.00068	-1.87202e-11	-5.99046e-11	-1.30247e-09
		0.0007	-1.80962e-11	-6.24006e-11	-1.29934e-09
		0.00072	-1.93442e-11	-6.36486e-11	-1.29808e-09
		0.00074	-1.93442e-11	-6.36486e-11	-1.2962e-09
		0.00076	-1.87202e-11	-6.36486e-11	-1.29307e-09
		0.00078	-1.80962e-11	-6.24006e-11	-1.28994e-09
		0.0008	-1.87202e-11	-6.36486e-11	-1.28931e-09
		0.00082	-1.99682e-11	-6.24006e-11	-1.29119e-09
		0.00084	-2.05922e-11	-6.05286e-11	-1.29432e-09
		0.00086	-1.99682e-11	-5.99046e-11	-1.2962e-09
		0.00088	-1.99682e-11	-5.80325e-11	-1.29808e-09
		0.0009	-1.87202e-11	-5.55365e-11	-1.30059e-09
		0.00092	-1.87202e-11	-5.67845e-11	-1.30059e-09
		0.00094	-1.87202e-11	-5.74085e-11	-1.29808e-09
		0.00096	-1.87202e-11	-5.61605e-11	-1.29495e-09
		0.00098	-1.93442e-11	-5.55365e-11	-1.29558e-09
		0.001	-1.87202e-11	-5.36645e-11	-1.29495e-09
		0.00102	-1.93442e-11	-5.67845e-11	-1.29495e-09
		0.00104	-1.68482e-11	-5.67845e-11	-1.2962e-09
		0.00106	-1.87202e-11	-5.99046e-11	-1.29934e-09
		0.00108	-1.74722e-11	-6.17766e-11	-1.30122e-09
		0.0011	-1.80962e-11	-6.17766e-11	-1.30498e-09
		0.00112	-1.93442e-11	-6.11526e-11	-1.30686e-09
		0.00114	-2.05922e-11	-6.05286e-11	-1.30749e-09
		0.00116	-1.99682e-11	-5.86565e-11	-1.30811e-09
		0.00118	-2.05922e-11	-5.80325e-11	-1.30874e-09
		0.0012	-2.05922e-11	-6.11526e-11	-1.30874e-09
		0.00122	-1.93442e-11	-6.11526e-11	-1.31062e-09
		0.00124	-1.87202e-11	-6.24006e-11	-1.31187e-09
		0.00126	-1.68482e-11	-6.30246e-11	-1.31438e-09
		0.00128	-1.62242e-11	-6.55206e-11	-1.31313e-09
		0.0013	-1.74722e-11	-6.36486e-11	-1.31187e-09
		0.00132	-1.74722e-11	-6.17766e-11	-1.30999e-09
		0.00134	-1.74722e-11	-6.36486e-11	-1.30561e-09
		0.00136	-1.74722e-11	-6.36486e-11	-1.30185e-09
		0.00138	-1.68482e-11	-6.36486e-11	-1.29746e-09
		0.0014	-1.62242e-11	-6.42726e-11	-1.2937e-09
		0.00142	-1.80962e-11	-6.42726e-11	-1.29056e-09
		0.00144	-1.87202e-11	-6.36486e-11	-1.2868e-09
		0.00146	-1.99682e-11	-6.36486e-11	-1.28367e-09
		0.00148	-2.30882e-11	-6.30246e-11	-1.28053e-09
		0.0015	-2.80803e-11	-6.36486e-11	-1.27928e-09
		0.00152	-3.36963e-11	-6.17766e-11	-1.27552e-09
		0.00154	-3.93124e-11	-5.99046e-11	-1.27427e-09
		0.00156	-4.80484e-11	-5.86565e-11	-1.26925e-09
		0.00158	-5.74085e-11	-5.86565e-11	-1.26863e-09
		0.0016	-6.61446e-11	-5.92806e-11	-1.26424e-09
		0.00162	-7.36327e-11	-6.05286e-11	-1.26361e-09
		0.00164	-7.73767e-11	-5.99046e-11	-1.26048e-09
		0.00166	-7.98727e-11	-6.24006e-11	-1.25985e-09
		0.00168	-7.98727e-11	-6.30246e-11	-1.26173e-09
		0.0017	-7.80007e-11	-6.24006e-11	-1.26424e-09
		0.00172	-7.23847e-11	-6.17766e-11	-1.26486e-09
		0.00174	-6.86406e-11	-6.11526e-11	-1.26612e-09
		0.00176	-6.24006e-11	-6.05286e-11	-1.26612e-09
		0.00178	-5.86565e-11	-5.92806e-11	-1.26612e-09
		0.0018	-5.61605e-11	-5.92806e-11	-1.26675e-09
		0.00182	-5.11685e-11	-5.86565e-11	-1.26612e-09
		0.00184	-4.92965e-11	-5.92806e-11	-1.26737e-09
		0.00186	-4.49284e-11	-5.99046e-11	-1.26925e-09
		0.00188	-4.18084e-11	-5.92806e-11	-1.27176e-09
		0.0019	-3.93124e-11	-5.92806e-11	-1.27427e-09
		0.00192	-3.49443e-11	-5.99046e-11	-1.27552e-09
		0.00194	-3.61923e-11	-5.86565e-11	-1.27615e-09
		0.00196	-3.68163e-11	-5.86565e-11	-1.27677e-09
		0.00198	-3.61923e-11	-5.61605e-11	-1.27677e-09
		0.002	-3.43203e-11	-5.67845e-11	-1.2774e-09
		0.00202	-3.30723e-11	-5.74085e-11	-1.27615e-09
		0.00204	-3.12003e-11	-5.80325e-11	-1.2774e-09
		0.00206	-2.99523e-11	-5.92806e-11	-1.27803e-09
		0.00208	-2.87043e-11	-5.99046e-11	-1.27991e-09
		0.0021	-2.80803e-11	-6.11526e-11	-1.28116e-09
		0.00212	-2.74563e-11	-6.11526e-11	-1.28116e-09
		0.00214	-2.74563e-11	-6.11526e-11	-1.27865e-09
		0.00216	-2.80803e-11	-6.24006e-11	-1.27615e-09
		0.00218	-2.80803e-11	-6.36486e-11	-1.27552e-09
		0.0022	-2.68322e-11	-6.42726e-11	-1.27113e-09
		0.00222	-2.37122e-11	-6.61446e-11	-1.268e-09
		0.00224	-2.30882e-11	-6.55206e-11	-1.26549e-09
		0.00226	-2.18402e-11	-6.42726e-11	-1.26361e-09
		0.00228	-2.30882e-11	-6.36486e-11	-1.26236e-09
		0.0023	-2.43362e-11	-6.36486e-11	-1.26236e-09
		0.00232	-2.37122e-11	-6.17766e-11	-1.26486e-09
		0.00234	-2.43362e-11	-6.30246e-11	-1.26549e-09
		0.00236	-2.55842e-11	-6.24006e-11	-1.26675e-09
		0.00238	-2.24642e-11	-6.24006e-11	-1.26863e-09
		0.0024	-2.12162e-11	-6.11526e-11	-1.27176e-09
		0.00242	-1.87202e-11	-6.30246e-11	-1.27427e-09
		0.00244	-1.74722e-11	-6.05286e-11	-1.27552e-09
		0.00246	-1.80962e-11	-6.11526e-11	-1.27615e-09
		0.00248	-2.05922e-11	-6.17766e-11	-1.27865e-09
		0.0025	-2.05922e-11	-5.99046e-11	-1.27865e-09
		0.00252	-2.12162e-11	-6.17766e-11	-1.27991e-09
		0.00254	-2.05922e-11	-5.92806e-11	-1.28179e-09
		0.00256	-1.87202e-11	-5.86565e-11	-1.28304e-09
		0.00258	-1.49761e-11	-5.80325e-11	-1.28618e-09
		0.0026	-1.62242e-11	-5.61605e-11	-1.28994e-09
		0.00262	-1.74722e-11	-5.61605e-11	-1.28994e-09
		0.00264	-1.99682e-11	-5.61605e-11	-1.29056e-09
		0.00266	-2.12162e-11	-5.80325e-11	-1.28994e-09
		0.00268	-2.24642e-11	-5.92806e-11	-1.28743e-09
		0.0027	-2.30882e-11	-5.99046e-11	-1.28806e-09
		0.00272	-2.05922e-11	-6.11526e-11	-1.28618e-09
		0.00274	-2.05922e-11	-6.30246e-11	-1.2868e-09
		0.00276	-2.12162e-11	-6.11526e-11	-1.28806e-09
		0.00278	-2.12162e-11	-5.99046e-11	-1.29119e-09
		0.0028	-2.24642e-11	-5.86565e-11	-1.29495e-09
		0.00282	-2.18402e-11	-5.74085e-11	-1.29997e-09
		0.00284	-2.24642e-11	-5.80325e-11	-1.30435e-09
		0.00286	-2.12162e-11	-5.92806e-11	-1.30623e-09
		0.00288	-1.80962e-11	-5.86565e-11	-1.30623e-09
		0.0029	-1.68482e-11	-6.05286e-11	-1.30435e-09
		0.00292	-1.74722e-11	-5.99046e-11	-1.30185e-09
		0.00294	-1.80962e-11	-6.05286e-11	-1.30122e-09
		0.00296	-1.87202e-11	-6.11526e-11	-1.29871e-09
		0.00298	-1.99682e-11	-6.24006e-11	-1.29871e-09
		0.003	-1.93442e-11	-6.30246e-11	-1.2937e-09
		0.00302	-1.87202e-11	-6.24006e-11	-1.28994e-09
		0.00304	-1.93442e-11	-6.11526e-11	-1.28555e-09
		0.00306	-1.93442e-11	-6.05286e-11	-1.28618e-09
		0.00308	-1.99682e-11	-5.86565e-11	-1.2937e-09
		0.0031	-2.24642e-11	-5.80325e-11	-1.30435e-09
		0.00312	-2.30882e-11	-5.74085e-11	-1.31375e-09
		0.00314	-2.30882e-11	-5.61605e-11	-1.31438e-09
		0.00316	-2.43362e-11	-5.61605e-11	-1.30686e-09
		0.00318	-2.30882e-11	-5.36645e-11	-1.29683e-09
		0.0032	-1.99682e-11	-5.30405e-11	-1.2937e-09
		0.00322	-1.80962e-11	-5.36645e-11	-1.29432e-09
		0.00324	-1.56001e-11	-5.74085e-11	-1.30185e-09
		0.00326	-1.56001e-11	-5.86565e-11	-1.31313e-09
		0.00328	-1.49761e-11	-6.42726e-11	-1.33005e-09
		0.0033	-1.62242e-11	-6.73926e-11	-1.34447e-09
		0.00332	-1.99682e-11	-7.23847e-11	-1.36076e-09
		0.00334	-1.93442e-11	-7.61287e-11	-1.37455e-09
		0.00336	-1.93442e-11	-7.98727e-11	-1.38709e-09
		0.00338	-1.87202e-11	-8.29928e-11	-1.39712e-09
		0.0034	-1.87202e-11	-8.92328e-11	-1.40401e-09
		0.00342	-1.93442e-11	-9.29769e-11	-1.40903e-09
		0.00344	-2.05922e-11	-9.67209e-11	-1.41028e-09
		0.00346	-2.18402e-11	-9.85929e-11	-1.40965e-09
		0.00348	-2.12162e-11	-1.00465e-10	-1.40715e-09
		0.0035	-1.93442e-11	-9.85929e-11	-1.40527e-09
		0.00352	-1.93442e-11	-9.98409e-11	-1.40151e-09
		0.00354	-1.49761e-11	-9.98409e-11	-1.39837e-09
		0.00356	-1.56001e-11	-9.79689e-11	-1.39649e-09
		0.00358	-1.43521e-11	-9.79689e-11	-1.39524e-09
		0.0036	-1.49761e-11	-9.79689e-11	-1.39398e-09
		0.00362	-1.56001e-11	-9.85929e-11	-1.39398e-09
		0.00364	-1.74722e-11	-9.73449e-11	-1.39273e-09
		0.00366	-1.87202e-11	-9.85929e-11	-1.3921e-09
		0.00368	-2.12162e-11	-9.73449e-11	-1.39085e-09
		0.0037	-2.24642e-11	-9.54729e-11	-1.38897e-09
		0.00372	-2.05922e-11	-9.54729e-11	-1.38709e-09
		0.00374	-2.12162e-11	-9.23529e-11	-1.38396e-09
		0.00376	-2.12162e-11	-9.17289e-11	-1.38207e-09
		0.00378	-2.05922e-11	-9.11049e-11	-1.38145e-09
		0.0038	-2.18402e-11	-9.04808e-11	-1.3827e-09
		0.00382	-2.12162e-11	-9.04808e-11	-1.38521e-09
		0.00384	-2.24642e-11	-8.92328e-11	-1.38834e-09
		0.00386	-2.12162e-11	-8.86088e-11	-1.39022e-09
		0.00388	-2.18402e-11	-9.04808e-11	-1.39586e-09
		0.0039	-1.93442e-11	-9.04808e-11	-1.399e-09
		0.00392	-1.87202e-11	-8.98568e-11	-1.399e-09
		0.00394	-1.80962e-11	-9.11049e-11	-1.40151e-09
		0.00396	-1.93442e-11	-9.04808e-11	-1.40151e-09
		0.00398	-1.99682e-11	-9.11049e-11	-1.39774e-09
		0.004	-2.12162e-11	-9.04808e-11	-1.39398e-09
		0.00402	-2.24642e-11	-8.73608e-11	-1.39336e-09
		0.00404	-2.12162e-11	-8.73608e-11	-1.38834e-09
		0.00406	-2.24642e-11	-8.48648e-11	-1.38458e-09
		0.00408	-2.12162e-11	-8.67368e-11	-1.37957e-09
		0.0041	-2.18402e-11	-8.48648e-11	-1.37831e-09
		0.00412	-2.37122e-11	-8.48648e-11	-1.37643e-09
		0.00414	-2.18402e-11	-8.42408e-11	-1.37518e-09
		0.00416	-2.18402e-11	-8.36168e-11	-1.37581e-09
		0.00418	-2.12162e-11	-8.61128e-11	-1.37769e-09
		0.0042	-2.18402e-11	-8.67368e-11	-1.37643e-09
		0.00422	-2.18402e-11	-8.67368e-11	-1.37957e-09
		0.00424	-2.18402e-11	-8.73608e-11	-1.37706e-09
		0.00426	-2.24642e-11	-8.92328e-11	-1.37957e-09
		0.00428	-2.12162e-11	-8.98568e-11	-1.38145e-09
		0.0043	-2.30882e-11	-9.04808e-11	-1.38521e-09
		0.00432	-2.43362e-11	-9.17289e-11	-1.38584e-09
		0.00434	-2.24642e-11	-9.11049e-11	-1.38646e-09
		0.00436	-2.12162e-11	-8.98568e-11	-1.38458e-09
		0.00438	-1.87202e-11	-8.92328e-11	-1.38646e-09
		0.0044	-1.93442e-11	-8.67368e-11	-1.38646e-09
		0.00442	-1.80962e-11	-8.61128e-11	-1.38458e-09
		0.00444	-1.80962e-11	-8.61128e-11	-1.38396e-09
		0.00446	-1.80962e-11	-8.48648e-11	-1.38019e-09
		0.00448	-1.87202e-11	-8.36168e-11	-1.37455e-09
		0.0045	-1.93442e-11	-8.48648e-11	-1.37455e-09
		0.00452	-1.87202e-11	-8.42408e-11	-1.37267e-09
		0.00454	-1.87202e-11	-8.42408e-11	-1.37518e-09
		0.00456	-1.68482e-11	-8.42408e-11	-1.3733e-09
		0.00458	-1.68482e-11	-8.42408e-11	-1.3733e-09
		0.0046	-1.74722e-11	-8.67368e-11	-1.37079e-09
		0.00462	-1.80962e-11	-8.42408e-11	-1.37205e-09
		0.00464	-2.05922e-11	-8.48648e-11	-1.37079e-09
		0.00466	-1.99682e-11	-8.23688e-11	-1.37142e-09
		0.00468	-2.05922e-11	-8.17448e-11	-1.36891e-09
		0.0047	-1.99682e-11	-8.11208e-11	-1.36703e-09
		0.00472	-1.99682e-11	-7.98727e-11	-1.36264e-09
		0.00474	-1.93442e-11	-7.86247e-11	-1.35951e-09
		0.00476	-1.99682e-11	-7.92487e-11	-1.35387e-09
		0.00478	-2.12162e-11	-7.92487e-11	-1.35074e-09
		0.0048	-2.37122e-11	-7.86247e-11	-1.34572e-09
		0.00482	-2.68322e-11	-7.86247e-11	-1.34384e-09
		0.00484	-2.55842e-11	-7.67527e-11	-1.34321e-09
		0.00486	-2.49602e-11	-7.67527e-11	-1.34321e-09
		0.00488	-2.18402e-11	-7.92487e-11	-1.34384e-09
		0.0049	-1.99682e-11	-7.92487e-11	-1.34509e-09
		0.00492	-2.05922e-11	-7.92487e-11	-1.34509e-09
		0.00494	-1.93442e-11	-7.73767e-11	-1.34572e-09
		0.00496	-1.99682e-11	-7.73767e-11	-1.34509e-09
		0.00498	-1.99682e-11	-7.67527e-11	-1.34447e-09
		0.005	-1.99682e-11	-7.80007e-11	-1.34384e-09
		0.00502	-2.18402e-11	-7.67527e-11	-1.34071e-09
		0.00504	-1.87202e-11	-7.92487e-11	-1.33883e-09
		0.00506	-1.74722e-11	-7.80007e-11	-1.33444e-09
		0.00508	-1.87202e-11	-7.92487e-11	-1.33319e-09
		0.0051	-2.05922e-11	-8.04967e-11	-1.33256e-09
		0.00512	-2.24642e-11	-8.11208e-11	-1.33256e-09
		0.00514	-2.37122e-11	-8.17448e-11	-1.33256e-09
		0.00516	-2.55842e-11	-8.23688e-11	-1.33507e-09
		0.00518	-2.30882e-11	-8.54888e-11	-1.33507e-09
		0.0052	-2.12162e-11	-8.48648e-11	-1.33444e-09
		0.00522	-1.93442e-11	-8.61128e-11	-1.33632e-09
		0.00524	-1.99682e-11	-8.61128e-11	-1.33632e-09
		0.00526	-1.74722e-11	-8.61128e-11	-1.33757e-09
		0.00528	-1.80962e-11	-8.61128e-11	-1.33695e-09
		0.0053	-1.93442e-11	-8.48648e-11	-1.33945e-09
		0.00532	-1.87202e-11	-8.54888e-11	-1.34133e-09
		0.00534	-1.93442e-11	-8.61128e-11	-1.34384e-09
		0.00536	-2.05922e-11	-8.48648e-11	-1.34572e-09
		0.00538	-2.05922e-11	-8.61128e-11	-1.34447e-09
		0.0054	-2.05922e-11	-8.48648e-11	-1.34384e-09
		0.00542	-2.12162e-11	-8.54888e-11	-1.34259e-09
		0.00544	-2.12162e-11	-8.42408e-11	-1.33945e-09
		0.00546	-2.24642e-11	-8.36168e-11	-1.33945e-09
		0.00548	-2.30882e-11	-8.23688e-11	-1.34071e-09
		0.0055	-2.18402e-11	-8.11208e-11	-1.34071e-09
		0.00552	-2.05922e-11	-7.98727e-11	-1.34321e-09
		0.00554	-1.87202e-11	-7.92487e-11	-1.34572e-09
		0.00556	-1.62242e-11	-7.80007e-11	-1.35074e-09
		0.00558	-1.62242e-11	-7.86247e-11	-1.35575e-09
		0.0056	-1.49761e-11	-7.86247e-11	-1.36076e-09
		0.00562	-1.80962e-11	-7.86247e-11	-1.36452e-09
		0.00564	-1.80962e-11	-7.73767e-11	-1.36578e-09
		0.00566	-2.30882e-11	-7.73767e-11	-1.36578e-09
		0.00568	-2.30882e-11	-7.73767e-11	-1.36264e-09
		0.0057	-2.43362e-11	-7.80007e-11	-1.35826e-09
		0.00572	-2.55842e-11	-7.67527e-11	-1.3545e-09
		0.00574	-2.37122e-11	-7.67527e-11	-1.35011e-09
		0.00576	-2.30882e-11	-7.61287e-11	-1.34886e-09
		0.00578	-2.37122e-11	-7.61287e-11	-1.34697e-09
		0.0058	-2.43362e-11	-7.42567e-11	-1.34635e-09
		0.00582	-2.55842e-11	-7.23847e-11	-1.3476e-09
		0.00584	-2.55842e-11	-7.30087e-11	-1.35136e-09
		0.00586	-2.62082e-11	-6.98887e-11	-1.35638e-09
		0.00588	-2.37122e-11	-6.86406e-11	-1.36014e-09
		0.0059	-2.24642e-11	-6.86406e-11	-1.36515e-09
		0.00592	-2.37122e-11	-6.98887e-11	-1.36891e-09
		0.00594	-2.12162e-11	-6.80166e-11	-1.37267e-09
		0.00596	-2.18402e-11	-6.86406e-11	-1.37393e-09
		0.00598	-2.24642e-11	-7.05127e-11	-1.37393e-09
		0.006	-2.24642e-11	-6.86406e-11	-1.37455e-09
		0.00602	-2.24642e-11	-6.98887e-11	-1.37518e-09
		0.00604	-2.18402e-11	-6.92646e-11	-1.37581e-09
		0.00606	-1.99682e-11	-6.92646e-11	-1.37142e-09
		0.00608	-1.99682e-11	-6.86406e-11	-1.35951e-09
		0.0061	-1.99682e-11	-6.92646e-11	-1.34823e-09
		0.00612	-1.99682e-11	-6.92646e-11	-1.34321e-09
		0.00614	-2.05922e-11	-7.11367e-11	-1.3476e-09
		0.00616	-2.05922e-11	-7.17607e-11	-1.35888e-09
		0.00618	-2.12162e-11	-7.42567e-11	-1.37017e-09
		0.0062	-2.05922e-11	-7.42567e-11	-1.37957e-09
		0.00622	-2.05922e-11	-7.36327e-11	-1.38019e-09
		0.00624	-1.87202e-11	-7.23847e-11	-1.37518e-09
		0.00626	-1.93442e-11	-6.98887e-11	-1.36578e-09
		0.00628	-1.87202e-11	-6.67686e-11	-1.35199e-09
		0.0063	-1.93442e-11	-6.24006e-11	-1.33757e-09
		0.00632	-1.87202e-11	-5.80325e-11	-1.3219e-09
		0.00634	-1.99682e-11	-5.36645e-11	-1.30811e-09
		0.00636	-1.74722e-11	-4.92965e-11	-1.29307e-09
		0.00638	-1.56001e-11	-4.49284e-11	-1.28053e-09
		0.0064	-1.49761e-11	-4.11844e-11	-1.26737e-09
		0.00642	-1.56001e-11	-3.93124e-11	-1.25609e-09
		0.00644	-1.74722e-11	-3.80644e-11	-1.24857e-09
		0.00646	-1.87202e-11	-3.68163e-11	-1.24105e-09
		0.00648	-2.12162e-11	-3.55683e-11	-1.23541e-09
		0.0065	-2.05922e-11	-3.61923e-11	-1.2329e-09
		0.00652	-2.12162e-11	-3.55683e-11	-1.22851e-09
		0.00654	-2.12162e-11	-3.43203e-11	-1.22788e-09
		0.00656	-2.05922e-11	-3.36963e-11	-1.22412e-09
		0.00658	-2.18402e-11	-3.36963e-11	-1.22099e-09
		0.0066	-2.12162e-11	-3.43203e-11	-1.21723e-09
		0.00662	-2.12162e-11	-3.36963e-11	-1.21598e-09
		0.00664	-2.30882e-11	-3.36963e-11	-1.21535e-09
		0.00666	-2.37122e-11	-3.24483e-11	-1.21535e-09
		0.00668	-2.55842e-11	-3.18243e-11	-1.21598e-09
		0.0067	-2.55842e-11	-2.93283e-11	-1.2166e-09
		0.00672	-2.62082e-11	-3.12003e-11	-1.21472e-09
		0.00674	-2.55842e-11	-3.18243e-11	-1.21284e-09
		0.00676	-2.43362e-11	-3.36963e-11	-1.20908e-09
		0.00678	-2.49602e-11	-3.68163e-11	-1.20469e-09
		0.0068	-2.18402e-11	-3.68163e-11	-1.20031e-09
		0.00682	-2.12162e-11	-3.86884e-11	-1.1978e-09
		0.00684	-2.05922e-11	-3.99364e-11	-1.19654e-09
		0.00686	-1.87202e-11	-3.99364e-11	-1.19717e-09
		0.00688	-1.56001e-11	-4.18084e-11	-1.19905e-09
		0.0069	-1.37281e-11	-4.24324e-11	-1.20093e-09
		0.00692	-1.37281e-11	-4.18084e-11	-1.20407e-09
		0.00694	-1.56001e-11	-4.11844e-11	-1.2072e-09
		0.00696	-1.74722e-11	-3.99364e-11	-1.20845e-09
		0.00698	-1.74722e-11	-3.99364e-11	-1.21159e-09
		0.007	-2.05922e-11	-3.99364e-11	-1.21284e-09
		0.00702	-2.12162e-11	-3.93124e-11	-1.21598e-09
		0.00704	-2.05922e-11	-3.99364e-11	-1.22036e-09
		0.00706	-2.05922e-11	-3.99364e-11	-1.22224e-09
		0.00708	-2.18402e-11	-3.93124e-11	-1.22475e-09
		0.0071	-1.99682e-11	-4.18084e-11	-1.22726e-09
		0.00712	-2.30882e-11	-4.30564e-11	-1.22663e-09
		0.00714	-2.24642e-11	-4.61764e-11	-1.226e-09
		0.00716	-2.49602e-11	-4.61764e-11	-1.2235e-09
		0.00718	-2.62082e-11	-4.99205e-11	-1.21848e-09
		0.0072	-2.49602e-11	-5.24165e-11	-1.21598e-09
		0.00722	-2.43362e-11	-5.24165e-11	-1.21159e-09
		0.00724	-2.43362e-11	-5.55365e-11	-1.20469e-09
		0.00726	-2.43362e-11	-5.49125e-11	-1.19968e-09
		0.00728	-2.49602e-11	-5.55365e-11	-1.19592e-09
		0.0073	-2.55842e-11	-5.67845e-11	-1.19278e-09
		0.00732	-2.55842e-11	-5.74085e-11	-1.19216e-09
		0.00734	-2.68322e-11	-5.80325e-11	-1.18965e-09
		0.00736	-2.68322e-11	-5.80325e-11	-1.1884e-09
		0.00738	-2.68322e-11	-5.80325e-11	-1.1884e-09
		0.0074	-2.74563e-11	-5.55365e-11	-1.19153e-09
		0.00742	-2.80803e-11	-5.55365e-11	-1.19278e-09
		0.00744	-2.99523e-11	-5.17925e-11	-1.1978e-09
		0.00746	-3.24483e-11	-5.17925e-11	-1.20093e-09
		0.00748	-3.49443e-11	-5.05445e-11	-1.20532e-09
		0.0075	-3.68163e-11	-4.92965e-11	-1.2072e-09
		0.00752	-3.86884e-11	-5.17925e-11	-1.2072e-09
		0.00754	-3.86884e-11	-5.24165e-11	-1.20469e-09
		0.00756	-3.80644e-11	-5.49125e-11	-1.20281e-09
		0.00758	-3.93124e-11	-5.61605e-11	-1.20031e-09
		0.0076	-3.93124e-11	-5.61605e-11	-1.19905e-09
		0.00762	-3.93124e-11	-5.49125e-11	-1.19968e-09
		0.00764	-3.80644e-11	-5.55365e-11	-1.20281e-09
		0.00766	-3.93124e-11	-5.42885e-11	-1.20407e-09
		0.00768	-3.86884e-11	-5.42885e-11	-1.20971e-09
		0.0077	-3.68163e-11	-5.30405e-11	-1.21221e-09
		0.00772	-3.68163e-11	-5.42885e-11	-1.21598e-09
		0.00774	-3.61923e-11	-5.36645e-11	-1.21723e-09
		0.00776	-3.74403e-11	-5.42885e-11	-1.21848e-09
		0.00778	-3.68163e-11	-5.17925e-11	-1.21848e-09
		0.0078	-3.74403e-11	-5.11685e-11	-1.22036e-09
		0.00782	-3.74403e-11	-5.11685e-11	-1.22224e-09
		0.00784	-3.74403e-11	-5.11685e-11	-1.22162e-09
		0.00786	-3.68163e-11	-4.99205e-11	-1.22099e-09
		0.00788	-3.74403e-11	-5.11685e-11	-1.22162e-09
		0.0079	-3.74403e-11	-4.99205e-11	-1.22224e-09
		0.00792	-3.68163e-11	-5.17925e-11	-1.21974e-09
		0.00794	-3.55683e-11	-5.36645e-11	-1.21911e-09
		0.00796	-3.55683e-11	-5.55365e-11	-1.22036e-09
		0.00798	-3.61923e-11	-5.61605e-11	-1.22224e-09
		0.008	-3.61923e-11	-5.49125e-11	-1.22287e-09
		0.00802	-3.43203e-11	-5.42885e-11	-1.22287e-09
		0.00804	-3.24483e-11	-5.17925e-11	-1.22287e-09
		0.00806	-3.18243e-11	-5.11685e-11	-1.22224e-09
		0.00808	-2.93283e-11	-5.24165e-11	-1.22036e-09
		0.0081	-2.87043e-11	-5.30405e-11	-1.21974e-09
		0.00812	-2.93283e-11	-5.24165e-11	-1.21786e-09
		0.00814	-2.99523e-11	-5.24165e-11	-1.21723e-09
		0.00816	-2.93283e-11	-5.36645e-11	-1.21723e-09
		0.00818	-2.99523e-11	-5.61605e-11	-1.21786e-09
		0.0082	-3.12003e-11	-5.86565e-11	-1.21974e-09
		0.00822	-3.24483e-11	-6.11526e-11	-1.22099e-09
		0.00824	-3.12003e-11	-5.99046e-11	-1.22287e-09
		0.00826	-3.05763e-11	-6.05286e-11	-1.22475e-09
		0.00828	-3.36963e-11	-6.11526e-11	-1.22726e-09
		0.0083	-3.36963e-11	-5.99046e-11	-1.23039e-09
		0.00832	-3.74403e-11	-5.86565e-11	-1.2329e-09
		0.00834	-3.74403e-11	-5.92806e-11	-1.23415e-09
		0.00836	-3.61923e-11	-5.61605e-11	-1.23791e-09
		0.00838	-3.43203e-11	-5.74085e-11	-1.24105e-09
		0.0084	-3.18243e-11	-5.74085e-11	-1.24543e-09
		0.00842	-3.12003e-11	-5.61605e-11	-1.24731e-09
		0.00844	-2.99523e-11	-5.74085e-11	-1.24857e-09
		0.00846	-2.80803e-11	-5.67845e-11	-1.24794e-09
		0.00848	-2.93283e-11	-5.74085e-11	-1.24481e-09
		0.0085	-3.05763e-11	-5.80325e-11	-1.23979e-09
		0.00852	-2.99523e-11	-5.86565e-11	-1.23603e-09
		0.00854	-2.80803e-11	-5.99046e-11	-1.23165e-09
		0.00856	-2.74563e-11	-6.05286e-11	-1.22788e-09
		0.00858	-2.55842e-11	-6.05286e-11	-1.22538e-09
		0.0086	-2.43362e-11	-6.30246e-11	-1.22538e-09
		0.00862	-2.49602e-11	-6.17766e-11	-1.22726e-09
		0.00864	-2.62082e-11	-6.17766e-11	-1.22976e-09
		0.00866	-2.62082e-11	-6.24006e-11	-1.23353e-09
		0.00868	-2.74563e-11	-6.17766e-11	-1.23854e-09
		0.0087	-2.99523e-11	-6.05286e-11	-1.24418e-09
		0.00872	-2.99523e-11	-6.11526e-11	-1.24731e-09
		0.00874	-3.12003e-11	-6.05286e-11	-1.25045e-09
		0.00876	-3.30723e-11	-6.11526e-11	-1.24857e-09
		0.00878	-3.36963e-11	-6.17766e-11	-1.24731e-09
		0.0088	-3.36963e-11	-6.36486e-11	-1.24543e-09
		0.00882	-3.24483e-11	-6.36486e-11	-1.2423e-09
		0.00884	-3.05763e-11	-6.36486e-11	-1.24042e-09
		0.00886	-2.93283e-11	-6.42726e-11	-1.24105e-09
		0.00888	-2.93283e-11	-6.24006e-11	-1.23979e-09
		0.0089	-2.87043e-11	-5.99046e-11	-1.24105e-09
		0.00892	-2.62082e-11	-5.92806e-11	-1.24105e-09
		0.00894	-2.62082e-11	-5.80325e-11	-1.23917e-09
		0.00896	-2.55842e-11	-5.74085e-11	-1.23541e-09
		0.00898	-2.62082e-11	-5.74085e-11	-1.23102e-09
		0.009	-2.55842e-11	-5.86565e-11	-1.22914e-09
		0.00902	-2.49602e-11	-5.92806e-11	-1.22538e-09
		0.00904	-2.55842e-11	-5.99046e-11	-1.22287e-09
		0.00906	-2.37122e-11	-5.92806e-11	-1.21848e-09
		0.00908	-2.43362e-11	-5.99046e-11	-1.21974e-09
		0.0091	-2.55842e-11	-5.86565e-11	-1.21786e-09
		0.00912	-2.74563e-11	-5.74085e-11	-1.21848e-09
		0.00914	-2.80803e-11	-5.67845e-11	-1.22099e-09
		0.00916	-2.74563e-11	-5.55365e-11	-1.2235e-09
		0.00918	-2.68322e-11	-5.55365e-11	-1.22475e-09
		0.0092	-2.68322e-11	-5.61605e-11	-1.22412e-09
		0.00922	-2.37122e-11	-5.42885e-11	-1.2235e-09
		0.00924	-2.24642e-11	-5.36645e-11	-1.22224e-09
		0.00926	-2.12162e-11	-5.36645e-11	-1.22036e-09
		0.00928	-2.24642e-11	-5.42885e-11	-1.22036e-09
		0.0093	-2.43362e-11	-5.55365e-11	-1.22036e-09
		0.00932	-2.68322e-11	-5.74085e-11	-1.21848e-09
		0.00934	-2.68322e-11	-6.11526e-11	-1.21723e-09
		0.00936	-2.74563e-11	-6.17766e-11	-1.21598e-09
		0.00938	-2.43362e-11	-6.42726e-11	-1.21723e-09
		0.0094	-2.24642e-11	-6.24006e-11	-1.21535e-09
		0.00942	-2.24642e-11	-6.36486e-11	-1.2166e-09
		0.00944	-2.24642e-11	-6.17766e-11	-1.21786e-09
		0.00946	-2.12162e-11	-6.05286e-11	-1.21911e-09
		0.00948	-2.12162e-11	-6.05286e-11	-1.22099e-09
		0.0095	-2.12162e-11	-6.05286e-11	-1.22412e-09
		0.00952	-2.12162e-11	-6.17766e-11	-1.226e-09
		0.00954	-1.99682e-11	-6.11526e-11	-1.22976e-09
		0.00956	-1.93442e-11	-6.11526e-11	-1.23102e-09
		0.00958	-1.93442e-11	-6.05286e-11	-1.23729e-09
		0.0096	-2.12162e-11	-5.74085e-11	-1.24105e-09
		0.00962	-2.18402e-11	-5.61605e-11	-1.24418e-09
		0.00964	-2.24642e-11	-5.55365e-11	-1.24606e-09
		0.00966	-2.68322e-11	-5.61605e-11	-1.24606e-09
		0.00968	-2.80803e-11	-5.80325e-11	-1.24606e-09
		0.0097	-2.93283e-11	-5.86565e-11	-1.24669e-09
		0.00972	-2.74563e-11	-5.99046e-11	-1.24857e-09
		0.00974	-2.68322e-11	-6.05286e-11	-1.24982e-09
		0.00976	-2.24642e-11	-6.17766e-11	-1.2492e-09
		0.00978	-2.43362e-11	-6.11526e-11	-1.24982e-09
		0.0098	-2.18402e-11	-6.24006e-11	-1.24857e-09
		0.00982	-2.18402e-11	-5.92806e-11	-1.2492e-09
		0.00984	-2.05922e-11	-5.99046e-11	-1.24731e-09
		0.00986	-1.99682e-11	-6.05286e-11	-1.24857e-09
		0.00988	-1.93442e-11	-6.17766e-11	-1.24982e-09
		0.0099	-1.99682e-11	-6.11526e-11	-1.2492e-09
		0.00992	-1.99682e-11	-5.99046e-11	-1.25296e-09
		0.00994	-1.93442e-11	-6.05286e-11	-1.25484e-09
		0.00996	-2.12162e-11	-5.99046e-11	-1.25546e-09
		0.00998	-2.18402e-11	-6.05286e-11	-1.25922e-09
		0.01	-2.05922e-11	-5.92806e-11	-1.2611e-09
		0.01002	-1.99682e-11	-5.74085e-11	-1.26486e-09
		0.01004	-2.05922e-11	-5.55365e-11	-1.26737e-09
		0.01006	-1.99682e-11	-5.36645e-11	-1.268e-09
		0.01008	-2.18402e-11	-5.49125e-11	-1.26737e-09
		0.0101	-2.24642e-11	-5.49125e-11	-1.26737e-09
		0.01012	-2.43362e-11	-5.61605e-11	-1.26549e-09
		0.01014	-2.49602e-11	-5.80325e-11	-1.26486e-09
		0.01016	-2.62082e-11	-5.86565e-11	-1.26737e-09
		0.01018	-2.80803e-11	-6.11526e-11	-1.27051e-09
		0.0102	-2.80803e-11	-6.05286e-11	-1.27364e-09
		0.01022	-2.68322e-11	-6.11526e-11	-1.2774e-09
		0.01024	-2.37122e-11	-5.99046e-11	-1.27615e-09
		0.01026	-2.43362e-11	-5.80325e-11	-1.27803e-09
		0.01028	-2.12162e-11	-5.74085e-11	-1.27803e-09
		0.0103	-2.12162e-11	-5.99046e-11	-1.27301e-09
		0.01032	-2.18402e-11	-5.92806e-11	-1.268e-09
		0.01034	-2.18402e-11	-6.11526e-11	-1.26173e-09
		0.01036	-2.12162e-11	-6.05286e-11	-1.25546e-09
		0.01038	-1.99682e-11	-6.30246e-11	-1.25045e-09
		0.0104	-2.05922e-11	-6.24006e-11	-1.24606e-09
		0.01042	-2.05922e-11	-6.24006e-11	-1.24418e-09
		0.01044	-1.93442e-11	-6.17766e-11	-1.2423e-09
		0.01046	-1.87202e-11	-5.92806e-11	-1.24167e-09
		0.01048	-1.87202e-11	-5.86565e-11	-1.24105e-09
		0.0105	-1.99682e-11	-5.74085e-11	-1.23979e-09
		0.01052	-1.87202e-11	-5.92806e-11	-1.24167e-09
		0.01054	-1.99682e-11	-5.86565e-11	-1.24293e-09
		0.01056	-1.99682e-11	-5.92806e-11	-1.24355e-09
		0.01058	-2.05922e-11	-5.86565e-11	-1.24418e-09
		0.0106	-2.12162e-11	-5.86565e-11	-1.24167e-09
		0.01062	-2.18402e-11	-5.92806e-11	-1.23854e-09
		0.01064	-2.24642e-11	-5.86565e-11	-1.23603e-09
		0.01066	-2.30882e-11	-5.92806e-11	-1.23603e-09
		0.01068	-2.24642e-11	-6.05286e-11	-1.23603e-09
		0.0107	-2.30882e-11	-6.24006e-11	-1.23666e-09
		0.01072	-2.05922e-11	-6.11526e-11	-1.23791e-09
		0.01074	-1.99682e-11	-6.05286e-11	-1.23917e-09
		0.01076	-1.87202e-11	-5.92806e-11	-1.24105e-09
		0.01078	-1.99682e-11	-5.92806e-11	-1.24105e-09
		0.0108	-2.18402e-11	-5.80325e-11	-1.24042e-09
		0.01082	-2.37122e-11	-5.80325e-11	-1.23791e-09
		0.01084	-2.37122e-11	-5.61605e-11	-1.23917e-09
		0.01086	-2.49602e-11	-5.80325e-11	-1.24042e-09
		0.01088	-2.43362e-11	-5.74085e-11	-1.23979e-09
		0.0109	-2.18402e-11	-5.99046e-11	-1.2423e-09
		0.01092	-2.12162e-11	-5.92806e-11	-1.24857e-09
		0.01094	-2.18402e-11	-5.80325e-11	-1.25484e-09
		0.01096	-2.12162e-11	-5.80325e-11	-1.2611e-09
		0.01098	-2.12162e-11	-5.74085e-11	-1.26549e-09
		0.011	-2.12162e-11	-5.49125e-11	-1.26988e-09
		0.01102	-2.12162e-11	-5.49125e-11	-1.27113e-09
		0.01104	-1.99682e-11	-5.42885e-11	-1.27176e-09
		0.01106	-2.18402e-11	-5.55365e-11	-1.27239e-09
		0.01108	-2.24642e-11	-5.61605e-11	-1.27427e-09
		0.0111	-2.18402e-11	-5.74085e-11	-1.27427e-09
		0.01112	-2.05922e-11	-5.61605e-11	-1.27239e-09
		0.01114	-1.93442e-11	-5.61605e-11	-1.27176e-09
		0.01116	-1.99682e-11	-5.67845e-11	-1.26675e-09
		0.01118	-1.93442e-11	-5.80325e-11	-1.26298e-09
		0.0112	-1.87202e-11	-6.11526e-11	-1.26173e-09
		0.01122	-1.80962e-11	-6.11526e-11	-1.2586e-09
		0.01124	-1.80962e-11	-6.24006e-11	-1.25985e-09
		0.01126	-1.80962e-11	-6.36486e-11	-1.2611e-09
		0.01128	-1.80962e-11	-6.24006e-11	-1.26424e-09
		0.0113	-1.93442e-11	-6.24006e-11	-1.26675e-09
		0.01132	-2.18402e-11	-6.24006e-11	-1.26737e-09
		0.01134	-2.24642e-11	-6.24006e-11	-1.26737e-09
		0.01136	-2.37122e-11	-6.24006e-11	-1.26549e-09
		0.01138	-2.18402e-11	-6.05286e-11	-1.26486e-09
		0.0114	-1.99682e-11	-6.05286e-11	-1.26236e-09
		0.01142	-1.87202e-11	-5.86565e-11	-1.2611e-09
		0.01144	-1.56001e-11	-5.67845e-11	-1.26236e-09
		0.01146	-1.62242e-11	-5.67845e-11	-1.26236e-09
		0.01148	-1.62242e-11	-5.49125e-11	-1.26173e-09
		0.0115	-1.49761e-11	-5.42885e-11	-1.26486e-09
		0.01152	-1.62242e-11	-5.67845e-11	-1.26486e-09
		0.01154	-1.68482e-11	-5.80325e-11	-1.26486e-09
		0.01156	-1.62242e-11	-5.74085e-11	-1.26361e-09
		0.01158	-1.62242e-11	-5.92806e-11	-1.26173e-09
		0.0116	-1.74722e-11	-5.55365e-11	-1.25985e-09
		0.01162	-1.80962e-11	-5.49125e-11	-1.25797e-09
		0.01164	-1.99682e-11	-5.42885e-11	-1.25734e-09
		0.01166	-2.30882e-11	-5.42885e-11	-1.2586e-09
		0.01168	-2.24642e-11	-5.49125e-11	-1.25797e-09
		0.0117	-2.30882e-11	-5.67845e-11	-1.26048e-09
		0.01172	-2.12162e-11	-5.92806e-11	-1.26173e-09
		0.01174	-2.18402e-11	-5.86565e-11	-1.26298e-09
		0.01176	-1.99682e-11	-5.99046e-11	-1.26298e-09
		0.01178	-1.99682e-11	-5.99046e-11	-1.26361e-09
		0.0118	-2.05922e-11	-5.99046e-11	-1.26173e-09
		0.01182	-2.12162e-11	-5.99046e-11	-1.26173e-09
		0.01184	-1.99682e-11	-5.86565e-11	-1.26048e-09
		0.01186	-2.12162e-11	-6.17766e-11	-1.26048e-09
		0.01188	-1.99682e-11	-6.24006e-11	-1.26048e-09
		0.0119	-1.93442e-11	-6.11526e-11	-1.25985e-09
		0.01192	-1.87202e-11	-6.11526e-11	-1.2586e-09
		0.01194	-2.12162e-11	-5.80325e-11	-1.25797e-09
		0.01196	-2.12162e-11	-5.92806e-11	-1.25734e-09
		0.01198	-2.24642e-11	-5.92806e-11	-1.2586e-09
		0.012	-2.18402e-11	-5.86565e-11	-1.26298e-09
		0.01202	-2.05922e-11	-6.11526e-11	-1.26549e-09
		0.01204	-2.18402e-11	-5.92806e-11	-1.26737e-09
		0.01206	-2.05922e-11	-5.99046e-11	-1.26863e-09
		0.01208	-2.18402e-11	-6.17766e-11	-1.26675e-09
		0.0121	-1.99682e-11	-6.05286e-11	-1.26424e-09
		0.01212	-1.99682e-11	-6.05286e-11	-1.25985e-09
		0.01214	-2.12162e-11	-6.11526e-11	-1.25546e-09
		0.01216	-2.12162e-11	-6.11526e-11	-1.24982e-09
		0.01218	-2.12162e-11	-6.17766e-11	-1.24355e-09
		0.0122	-2.05922e-11	-6.36486e-11	-1.23791e-09
		0.01222	-1.93442e-11	-6.17766e-11	-1.23102e-09
		0.01224	-2.05922e-11	-5.99046e-11	-1.22851e-09
		0.01226	-1.87202e-11	-5.92806e-11	-1.22538e-09
		0.01228	-1.93442e-11	-5.99046e-11	-1.22412e-09
		0.0123	-1.80962e-11	-5.61605e-11	-1.226e-09
		0.01232	-1.80962e-11	-5.55365e-11	-1.226e-09
		0.01234	-1.93442e-11	-5.61605e-11	-1.22851e-09
		0.01236	-1.87202e-11	-5.74085e-11	-1.22851e-09
		0.01238	-1.93442e-11	-5.86565e-11	-1.22851e-09
		0.0124	-1.93442e-11	-5.92806e-11	-1.22851e-09
		0.01242	-2.05922e-11	-5.80325e-11	-1.22914e-09
		0.01244	-1.93442e-11	-5.67845e-11	-1.23039e-09
		0.01246	-2.18402e-11	-5.49125e-11	-1.23165e-09
		0.01248	-2.05922e-11	-5.61605e-11	-1.2329e-09
		0.0125	-2.18402e-11	-5.61605e-11	-1.2329e-09
		0.01252	-1.80962e-11	-5.74085e-11	-1.23227e-09
		0.01254	-1.68482e-11	-5.67845e-11	-1.23039e-09
		0.01256	-1.49761e-11	-5.67845e-11	-1.23102e-09
		0.01258	-1.43521e-11	-5.80325e-11	-1.23227e-09
		0.0126	-1.62242e-11	-5.86565e-11	-1.23603e-09
		0.01262	-1.68482e-11	-5.92806e-11	-1.24042e-09
		0.01264	-1.80962e-11	-5.86565e-11	-1.24418e-09
		0.01266	-1.80962e-11	-5.80325e-11	-1.24794e-09
		0.01268	-1.80962e-11	-5.80325e-11	-1.24982e-09
		0.0127	-1.68482e-11	-5.80325e-11	-1.25108e-09
		0.01272	-1.62242e-11	-5.74085e-11	-1.24982e-09
		0.01274	-1.74722e-11	-5.92806e-11	-1.2492e-09
		0.01276	-1.74722e-11	-6.30246e-11	-1.2492e-09
		0.01278	-1.87202e-11	-6.73926e-11	-1.24982e-09
		0.0128	-2.18402e-11	-7.55047e-11	-1.25358e-09
		0.01282	-2.24642e-11	-8.48648e-11	-1.25546e-09
		0.01284	-2.24642e-11	-9.42249e-11	-1.25922e-09
		0.01286	-2.30882e-11	-9.85929e-11	-1.2611e-09
		0.01288	-2.18402e-11	-1.01089e-10	-1.26173e-09
		0.0129	-1.74722e-11	-1.04209e-10	-1.26048e-09
		0.01292	-1.68482e-11	-1.04209e-10	-1.25985e-09
		0.01294	-1.56001e-11	-1.01713e-10	-1.26236e-09
		0.01296	-1.56001e-11	-1.01713e-10	-1.25922e-09
		0.01298	-1.56001e-11	-9.98409e-11	-1.25672e-09
		0.013	-1.49761e-11	-9.73449e-11	-1.25421e-09
		0.01302	-1.56001e-11	-9.54729e-11	-1.25421e-09
		0.01304	-1.56001e-11	-9.36009e-11	-1.25108e-09
		0.01306	-1.62242e-11	-8.92328e-11	-1.24982e-09
		0.01308	-1.62242e-11	-9.04808e-11	-1.24982e-09
		0.0131	-1.62242e-11	-8.86088e-11	-1.24731e-09
		0.01312	-1.74722e-11	-8.86088e-11	-1.24669e-09
		0.01314	-1.80962e-11	-8.92328e-11	-1.24293e-09
		0.01316	-1.93442e-11	-9.11049e-11	-1.23979e-09
		0.01318	-1.87202e-11	-9.11049e-11	-1.23603e-09
		0.0132	-1.80962e-11	-8.92328e-11	-1.23102e-09
		0.01322	-1.80962e-11	-8.61128e-11	-1.22726e-09
		0.01324	-1.80962e-11	-8.54888e-11	-1.22412e-09
		0.01326	-1.80962e-11	-8.23688e-11	-1.22099e-09
		0.01328	-1.74722e-11	-7.92487e-11	-1.21911e-09
		0.0133	-1.80962e-11	-7.80007e-11	-1.21974e-09
		0.01332	-1.87202e-11	-7.80007e-11	-1.22224e-09
		0.01334	-1.80962e-11	-7.86247e-11	-1.22287e-09
		0.01336	-1.74722e-11	-8.04967e-11	-1.22412e-09
		0.01338	-1.62242e-11	-8.17448e-11	-1.22726e-09
		0.0134	-1.49761e-11	-8.17448e-11	-1.23165e-09
		0.01342	-1.56001e-11	-8.04967e-11	-1.23353e-09
		0.01344	-1.56001e-11	-7.86247e-11	-1.23603e-09
		0.01346	-1.68482e-11	-7.73767e-11	-1.23541e-09
		0.01348	-1.80962e-11	-7.48807e-11	-1.23227e-09
		0.0135	-1.99682e-11	-7.17607e-11	-1.22851e-09
		0.01352	-2.12162e-11	-7.17607e-11	-1.22538e-09
		0.01354	-2.12162e-11	-6.98887e-11	-1.22099e-09
		0.01356	-2.05922e-11	-6.80166e-11	-1.21848e-09
		0.01358	-1.87202e-11	-6.67686e-11	-1.22036e-09
		0.0136	-1.87202e-11	-6.55206e-11	-1.22412e-09
		0.01362	-1.87202e-11	-6.48966e-11	-1.22726e-09
		0.01364	-1.93442e-11	-6.55206e-11	-1.22851e-09
		0.01366	-1.93442e-11	-6.67686e-11	-1.22914e-09
		0.01368	-1.80962e-11	-6.80166e-11	-1.22914e-09
		0.0137	-1.80962e-11	-6.86406e-11	-1.22851e-09
		0.01372	-1.68482e-11	-6.86406e-11	-1.22788e-09
		0.01374	-1.62242e-11	-6.92646e-11	-1.22788e-09
		0.01376	-1.87202e-11	-6.92646e-11	-1.22726e-09
		0.01378	-1.93442e-11	-6.92646e-11	-1.226e-09
		0.0138	-1.87202e-11	-6.86406e-11	-1.22726e-09
		0.01382	-1.87202e-11	-6.80166e-11	-1.22788e-09
		0.01384	-1.74722e-11	-6.73926e-11	-1.22788e-09
		0.01386	-1.68482e-11	-6.55206e-11	-1.22976e-09
		0.01388	-1.49761e-11	-6.61446e-11	-1.23415e-09
		0.0139	-1.56001e-11	-6.61446e-11	-1.23979e-09
		0.01392	-1.37281e-11	-6.48966e-11	-1.24355e-09
		0.01394	-1.31041e-11	-6.73926e-11	-1.24731e-09
		0.01396	-1.43521e-11	-6.80166e-11	-1.2492e-09
		0.01398	-1.56001e-11	-6.92646e-11	-1.25108e-09
		0.014	-1.49761e-11	-6.92646e-11	-1.25233e-09
		0.01402	-1.62242e-11	-6.86406e-11	-1.25108e-09
		0.01404	-1.56001e-11	-6.86406e-11	-1.25108e-09
		0.01406	-1.56001e-11	-6.67686e-11	-1.25233e-09
		0.01408	-1.37281e-11	-6.67686e-11	-1.2517e-09
		0.0141	-1.37281e-11	-6.55206e-11	-1.25358e-09
		0.01412	-1.68482e-11	-6.42726e-11	-1.25546e-09
		0.01414	-1.74722e-11	-6.48966e-11	-1.2611e-09
		0.01416	-1.87202e-11	-6.55206e-11	-1.26737e-09
		0.01418	-2.18402e-11	-6.80166e-11	-1.27176e-09
		0.0142	-1.80962e-11	-6.86406e-11	-1.27489e-09
		0.01422	-1.87202e-11	-6.86406e-11	-1.27677e-09
		0.01424	-1.87202e-11	-6.92646e-11	-1.27677e-09
		0.01426	-1.68482e-11	-7.05127e-11	-1.27489e-09
		0.01428	-1.68482e-11	-6.98887e-11	-1.27427e-09
		0.0143	-1.93442e-11	-7.05127e-11	-1.27552e-09
		0.01432	-1.87202e-11	-7.17607e-11	-1.27552e-09
		0.01434	-1.99682e-11	-7.23847e-11	-1.27552e-09
		0.01436	-2.12162e-11	-7.23847e-11	-1.2774e-09
		0.01438	-2.12162e-11	-7.17607e-11	-1.27803e-09
		0.0144	-2.12162e-11	-7.17607e-11	-1.27991e-09
		0.01442	-2.24642e-11	-7.17607e-11	-1.28367e-09
		0.01444	-2.24642e-11	-7.11367e-11	-1.2843e-09
		0.01446	-2.43362e-11	-6.98887e-11	-1.2843e-09
		0.01448	-2.30882e-11	-6.86406e-11	-1.28492e-09
		0.0145	-2.12162e-11	-6.67686e-11	-1.28367e-09
		0.01452	-2.05922e-11	-6.61446e-11	-1.28367e-09
		0.01454	-1.99682e-11	-6.55206e-11	-1.28116e-09
		0.01456	-2.05922e-11	-6.48966e-11	-1.27928e-09
		0.01458	-2.05922e-11	-6.36486e-11	-1.27615e-09
		0.0146	-2.12162e-11	-6.36486e-11	-1.27239e-09
		0.01462	-2.24642e-11	-6.24006e-11	-1.26988e-09
		0.01464	-2.49602e-11	-6.11526e-11	-1.26925e-09
		0.01466	-2.68322e-11	-5.92806e-11	-1.26988e-09
		0.01468	-2.62082e-11	-6.05286e-11	-1.27113e-09
		0.0147	-2.74563e-11	-6.30246e-11	-1.27113e-09
		0.01472	-2.55842e-11	-6.36486e-11	-1.26988e-09
		0.01474	-2.30882e-11	-6.42726e-11	-1.27051e-09
		0.01476	-2.37122e-11	-6.42726e-11	-1.26988e-09
		0.01478	-2.30882e-11	-6.42726e-11	-1.26863e-09
		0.0148	-2.43362e-11	-6.61446e-11	-1.268e-09
		0.01482	-2.37122e-11	-6.67686e-11	-1.268e-09
		0.01484	-2.24642e-11	-6.73926e-11	-1.26486e-09
		0.01486	-2.18402e-11	-6.73926e-11	-1.26549e-09
		0.01488	-2.18402e-11	-6.61446e-11	-1.26424e-09
		0.0149	-1.93442e-11	-6.67686e-11	-1.26298e-09
		0.01492	-1.80962e-11	-6.73926e-11	-1.26048e-09
		0.01494	-1.68482e-11	-6.48966e-11	-1.25985e-09
		0.01496	-1.49761e-11	-6.24006e-11	-1.25922e-09
		0.01498	-1.43521e-11	-6.42726e-11	-1.2586e-09
		0.015	-1.56001e-11	-6.36486e-11	-1.25922e-09
		0.01502	-1.49761e-11	-6.30246e-11	-1.25734e-09
		0.01504	-1.43521e-11	-6.24006e-11	-1.25546e-09
		0.01506	-1.62242e-11	-6.36486e-11	-1.25233e-09
		0.01508	-1.80962e-11	-6.17766e-11	-1.2517e-09
		0.0151	-1.93442e-11	-6.11526e-11	-1.25045e-09
		0.01512	-2.05922e-11	-5.99046e-11	-1.25108e-09
		0.01514	-2.18402e-11	-5.92806e-11	-1.25108e-09
		0.01516	-2.37122e-11	-5.86565e-11	-1.25296e-09
		0.01518	-2.43362e-11	-5.86565e-11	-1.25609e-09
		0.0152	-2.30882e-11	-5.86565e-11	-1.25922e-09
		0.01522	-2.12162e-11	-5.92806e-11	-1.26173e-09
		0.01524	-2.05922e-11	-5.92806e-11	-1.26298e-09
		0.01526	-2.05922e-11	-5.92806e-11	-1.26549e-09
		0.01528	-2.05922e-11	-5.99046e-11	-1.26612e-09
		0.0153	-2.24642e-11	-6.05286e-11	-1.27051e-09
		0.01532	-2.24642e-11	-6.17766e-11	-1.27364e-09
		0.01534	-2.37122e-11	-6.11526e-11	-1.27489e-09
		0.01536	-2.24642e-11	-6.11526e-11	-1.27427e-09
		0.01538	-1.99682e-11	-6.17766e-11	-1.27301e-09
		0.0154	-1.80962e-11	-6.11526e-11	-1.27364e-09
		0.01542	-1.80962e-11	-6.11526e-11	-1.27113e-09
		0.01544	-1.74722e-11	-5.99046e-11	-1.27113e-09
		0.01546	-1.80962e-11	-5.99046e-11	-1.268e-09
		0.01548	-1.93442e-11	-5.99046e-11	-1.268e-09
		0.0155	-1.87202e-11	-5.99046e-11	-1.268e-09
		0.01552	-1.80962e-11	-5.99046e-11	-1.26863e-09
		0.01554	-1.80962e-11	-5.99046e-11	-1.27113e-09
		0.01556	-1.74722e-11	-6.17766e-11	-1.27113e-09
		0.01558	-1.68482e-11	-6.36486e-11	-1.27552e-09
		0.0156	-1.74722e-11	-6.48966e-11	-1.27803e-09
		0.01562	-1.74722e-11	-6.48966e-11	-1.28116e-09
		0.01564	-1.80962e-11	-6.61446e-11	-1.2843e-09
		0.01566	-1.93442e-11	-6.48966e-11	-1.28304e-09
		0.01568	-1.80962e-11	-6.61446e-11	-1.28304e-09
		0.0157	-1.80962e-11	-6.55206e-11	-1.27928e-09
		0.01572	-1.74722e-11	-6.55206e-11	-1.27865e-09
		0.01574	-1.56001e-11	-6.42726e-11	-1.2774e-09
		0.01576	-1.80962e-11	-6.30246e-11	-1.27552e-09
		0.01578	-1.74722e-11	-6.30246e-11	-1.27552e-09
		0.0158	-1.80962e-11	-6.17766e-11	-1.27364e-09
		0.01582	-1.87202e-11	-6.11526e-11	-1.27489e-09
		0.01584	-1.80962e-11	-6.05286e-11	-1.27552e-09
		0.01586	-1.74722e-11	-5.99046e-11	-1.27615e-09
		0.01588	-1.56001e-11	-5.86565e-11	-1.27803e-09
		0.0159	-1.37281e-11	-5.74085e-11	-1.27803e-09
		0.01592	-1.37281e-11	-5.67845e-11	-1.27928e-09
		0.01594	-1.49761e-11	-5.55365e-11	-1.28116e-09
		0.01596	-1.56001e-11	-5.55365e-11	-1.28242e-09
		0.01598	-1.74722e-11	-5.67845e-11	-1.28555e-09
		0.016	-1.87202e-11	-5.80325e-11	-1.28618e-09
		0.01602	-1.74722e-11	-5.99046e-11	-1.28868e-09
		0.01604	-1.74722e-11	-5.99046e-11	-1.28868e-09
		0.01606	-1.68482e-11	-6.11526e-11	-1.28618e-09
		0.01608	-1.68482e-11	-6.05286e-11	-1.2843e-09
		0.0161	-1.74722e-11	-6.11526e-11	-1.28304e-09
		0.01612	-1.99682e-11	-5.99046e-11	-1.28053e-09
		0.01614	-2.05922e-11	-5.92806e-11	-1.2774e-09
		0.01616	-2.18402e-11	-6.05286e-11	-1.27489e-09
		0.01618	-2.30882e-11	-6.17766e-11	-1.26863e-09
		0.0162	-2.24642e-11	-5.99046e-11	-1.26298e-09
		0.01622	-2.18402e-11	-6.11526e-11	-1.25985e-09
		0.01624	-2.12162e-11	-6.05286e-11	-1.25797e-09
		0.01626	-2.12162e-11	-5.99046e-11	-1.25734e-09
		0.01628	-1.99682e-11	-5.99046e-11	-1.25609e-09
		0.0163	-2.24642e-11	-6.05286e-11	-1.2517e-09
		0.01632	-2.18402e-11	-6.05286e-11	-1.24731e-09
		0.01634	-1.99682e-11	-6.11526e-11	-1.24418e-09
		0.01636	-2.05922e-11	-6.17766e-11	-1.24105e-09
		0.01638	-1.93442e-11	-5.99046e-11	-1.23603e-09
		0.0164	-1.93442e-11	-6.11526e-11	-1.2329e-09
		0.01642	-2.05922e-11	-6.11526e-11	-1.22976e-09
		0.01644	-2.05922e-11	-6.17766e-11	-1.22663e-09
		0.01646	-2.24642e-11	-6.24006e-11	-1.22287e-09
		0.01648	-2.43362e-11	-6.30246e-11	-1.22162e-09
		0.0165	-2.37122e-11	-6.30246e-11	-1.21911e-09
		0.01652	-2.37122e-11	-6.42726e-11	-1.21974e-09
		0.01654	-2.18402e-11	-6.30246e-11	-1.21848e-09
		0.01656	-2.12162e-11	-6.11526e-11	-1.21911e-09
		0.01658	-2.24642e-11	-5.99046e-11	-1.22224e-09
		0.0166	-2.37122e-11	-5.99046e-11	-1.226e-09
		0.01662	-2.55842e-11	-5.99046e-11	-1.23039e-09
		0.01664	-2.49602e-11	-5.86565e-11	-1.2329e-09
		0.01666	-2.55842e-11	-5.86565e-11	-1.23415e-09
		0.01668	-2.43362e-11	-5.74085e-11	-1.23353e-09
		0.0167	-2.30882e-11	-5.74085e-11	-1.23102e-09
		0.01672	-2.18402e-11	-5.86565e-11	-1.22914e-09
		0.01674	-2.05922e-11	-5.74085e-11	-1.22538e-09
		0.01676	-2.24642e-11	-5.92806e-11	-1.226e-09
		0.01678	-2.24642e-11	-5.86565e-11	-1.22663e-09
		0.0168	-2.43362e-11	-5.92806e-11	-1.22475e-09
		0.01682	-2.43362e-11	-5.99046e-11	-1.22412e-09
		0.01684	-2.49602e-11	-6.05286e-11	-1.22538e-09
		0.01686	-2.18402e-11	-6.05286e-11	-1.22412e-09
		0.01688	-2.05922e-11	-6.05286e-11	-1.22475e-09
		0.0169	-1.87202e-11	-5.86565e-11	-1.22538e-09
		0.01692	-1.74722e-11	-5.80325e-11	-1.22788e-09
		0.01694	-1.80962e-11	-5.49125e-11	-1.22914e-09
		0.01696	-1.80962e-11	-5.42885e-11	-1.23102e-09
		0.01698	-1.68482e-11	-5.36645e-11	-1.2329e-09
		0.017	-1.93442e-11	-5.36645e-11	-1.23353e-09
		0.01702	-2.05922e-11	-5.24165e-11	-1.23478e-09
		0.01704	-2.18402e-11	-5.36645e-11	-1.23729e-09
		0.01706	-2.12162e-11	-5.55365e-11	-1.23979e-09
		0.01708	-2.05922e-11	-5.49125e-11	-1.2423e-09
		0.0171	-1.87202e-11	-5.24165e-11	-1.24481e-09
		0.01712	-2.05922e-11	-5.30405e-11	-1.25045e-09
		0.01714	-1.99682e-11	-5.24165e-11	-1.25421e-09
		0.01716	-2.12162e-11	-5.17925e-11	-1.25922e-09
		0.01718	-2.05922e-11	-5.17925e-11	-1.26361e-09
		0.0172	-2.18402e-11	-5.42885e-11	-1.26925e-09
		0.01722	-2.12162e-11	-5.55365e-11	-1.26988e-09
		0.01724	-1.93442e-11	-5.67845e-11	-1.27113e-09
		0.01726	-1.99682e-11	-5.61605e-11	-1.27301e-09
		0.01728	-1.99682e-11	-5.80325e-11	-1.27239e-09
		0.0173	-2.12162e-11	-5.86565e-11	-1.27364e-09
		0.01732	-1.99682e-11	-6.05286e-11	-1.27427e-09
		0.01734	-1.93442e-11	-5.86565e-11	-1.27489e-09
		0.01736	-1.80962e-11	-6.05286e-11	-1.27677e-09
		0.01738	-1.49761e-11	-6.05286e-11	-1.27677e-09
		0.0174	-1.31041e-11	-6.05286e-11	-1.27803e-09
		0.01742	-1.18561e-11	-5.80325e-11	-1.27928e-09
		0.01744	-1.49761e-11	-5.80325e-11	-1.28116e-09
		0.01746	-1.56001e-11	-5.42885e-11	-1.28492e-09
		0.01748	-1.74722e-11	-5.24165e-11	-1.2868e-09
		0.0175	-1.80962e-11	-5.24165e-11	-1.28743e-09
		0.01752	-1.87202e-11	-5.24165e-11	-1.28555e-09
		0.01754	-1.80962e-11	-5.42885e-11	-1.28242e-09
		0.01756	-1.87202e-11	-5.42885e-11	-1.27928e-09
		0.01758	-1.74722e-11	-5.55365e-11	-1.27364e-09
		0.0176	-1.74722e-11	-5.61605e-11	-1.26988e-09
		0.01762	-1.87202e-11	-5.80325e-11	-1.26549e-09
		0.01764	-1.74722e-11	-5.61605e-11	-1.26236e-09
		0.01766	-1.93442e-11	-5.80325e-11	-1.25922e-09
		0.01768	-1.87202e-11	-5.80325e-11	-1.25985e-09
		0.0177	-1.80962e-11	-5.99046e-11	-1.2611e-09
		0.01772	-1.80962e-11	-5.92806e-11	-1.26236e-09
		0.01774	-1.93442e-11	-5.99046e-11	-1.26549e-09
		0.01776	-1.93442e-11	-5.99046e-11	-1.268e-09
		0.01778	-2.12162e-11	-6.05286e-11	-1.26925e-09
		0.0178	-2.24642e-11	-5.99046e-11	-1.27301e-09
		0.01782	-2.49602e-11	-5.92806e-11	-1.27364e-09
		0.01784	-2.43362e-11	-5.74085e-11	-1.27301e-09
		0.01786	-2.12162e-11	-5.92806e-11	-1.27489e-09
		0.01788	-1.93442e-11	-5.92806e-11	-1.27427e-09
		0.0179	-1.68482e-11	-5.86565e-11	-1.27489e-09
		0.01792	-1.49761e-11	-5.99046e-11	-1.27113e-09
		0.01794	-1.49761e-11	-6.05286e-11	-1.26988e-09
		0.01796	-1.62242e-11	-6.17766e-11	-1.26737e-09
		0.01798	-1.68482e-11	-6.11526e-11	-1.26486e-09
		0.018	-1.80962e-11	-6.11526e-11	-1.2611e-09
		0.01802	-1.74722e-11	-5.99046e-11	-1.25922e-09
		0.01804	-1.68482e-11	-5.99046e-11	-1.25922e-09
		0.01806	-1.68482e-11	-5.92806e-11	-1.25922e-09
		0.01808	-1.62242e-11	-5.99046e-11	-1.26173e-09
		0.0181	-1.56001e-11	-6.05286e-11	-1.26424e-09
		0.01812	-1.56001e-11	-5.99046e-11	-1.26549e-09
		0.01814	-1.80962e-11	-6.11526e-11	-1.26675e-09
		0.01816	-1.99682e-11	-6.05286e-11	-1.26737e-09
		0.01818	-1.99682e-11	-6.17766e-11	-1.26612e-09
		0.0182	-2.05922e-11	-6.30246e-11	-1.26424e-09
		0.01822	-2.12162e-11	-6.30246e-11	-1.26236e-09
		0.01824	-2.05922e-11	-6.36486e-11	-1.26048e-09
		0.01826	-1.93442e-11	-6.30246e-11	-1.2586e-09
		0.01828	-1.87202e-11	-6.36486e-11	-1.2586e-09
		0.0183	-1.87202e-11	-6.48966e-11	-1.25985e-09
		0.01832	-2.05922e-11	-6.48966e-11	-1.26361e-09
		0.01834	-1.87202e-11	-6.61446e-11	-1.26925e-09
		0.01836	-1.87202e-11	-6.55206e-11	-1.27615e-09
		0.01838	-1.74722e-11	-6.42726e-11	-1.27928e-09
		0.0184	-1.74722e-11	-6.24006e-11	-1.28304e-09
		0.01842	-1.80962e-11	-6.05286e-11	-1.28618e-09
		0.01844	-1.74722e-11	-5.99046e-11	-1.29056e-09
		0.01846	-1.93442e-11	-5.92806e-11	-1.29182e-09
		0.01848	-1.87202e-11	-5.86565e-11	-1.29432e-09
		0.0185	-2.12162e-11	-5.99046e-11	-1.2962e-09
		0.01852	-2.05922e-11	-6.11526e-11	-1.29746e-09
		0.01854	-1.80962e-11	-6.30246e-11	-1.29808e-09
		0.01856	-1.80962e-11	-6.30246e-11	-1.29934e-09
		0.01858	-1.62242e-11	-6.36486e-11	-1.29808e-09
		0.0186	-1.80962e-11	-6.42726e-11	-1.2962e-09
		0.01862	-1.62242e-11	-6.30246e-11	-1.29244e-09
		0.01864	-1.68482e-11	-6.55206e-11	-1.28994e-09
		0.01866	-1.74722e-11	-6.55206e-11	-1.28555e-09
		0.01868	-1.74722e-11	-6.55206e-11	-1.28116e-09
		0.0187	-1.68482e-11	-6.67686e-11	-1.27928e-09
		0.01872	-1.68482e-11	-6.55206e-11	-1.27803e-09
		0.01874	-1.68482e-11	-6.42726e-11	-1.27928e-09
		0.01876	-1.49761e-11	-6.24006e-11	-1.27991e-09
		0.01878	-1.74722e-11	-6.24006e-11	-1.28053e-09
		0.0188	-1.99682e-11	-6.17766e-11	-1.28242e-09
		0.01882	-1.99682e-11	-6.17766e-11	-1.28242e-09
		0.01884	-1.99682e-11	-6.05286e-11	-1.28492e-09
		0.01886	-1.99682e-11	-6.17766e-11	-1.28555e-09
		0.01888	-1.74722e-11	-6.24006e-11	-1.28367e-09
		0.0189	-1.56001e-11	-6.24006e-11	-1.28179e-09
		0.01892	-1.56001e-11	-6.36486e-11	-1.27865e-09
		0.01894	-1.62242e-11	-6.48966e-11	-1.27552e-09
		0.01896	-1.74722e-11	-6.55206e-11	-1.27489e-09
		0.01898	-1.99682e-11	-6.61446e-11	-1.27301e-09
		0.019	-2.24642e-11	-6.73926e-11	-1.27176e-09
		0.01902	-2.12162e-11	-6.73926e-11	-1.27051e-09
		0.01904	-1.99682e-11	-6.67686e-11	-1.26549e-09
		0.01906	-2.18402e-11	-6.48966e-11	-1.26298e-09
		0.01908	-1.93442e-11	-6.36486e-11	-1.2611e-09
		0.0191	-1.93442e-11	-6.36486e-11	-1.2611e-09
		0.01912	-2.05922e-11	-6.11526e-11	-1.25985e-09
		0.01914	-2.12162e-11	-6.17766e-11	-1.2586e-09
		0.01916	-2.18402e-11	-6.17766e-11	-1.25672e-09
		0.01918	-2.12162e-11	-5.99046e-11	-1.25672e-09
		0.0192	-2.12162e-11	-6.05286e-11	-1.25797e-09
		0.01922	-1.93442e-11	-5.99046e-11	-1.26048e-09
		0.01924	-1.74722e-11	-6.17766e-11	-1.26424e-09
		0.01926	-1.74722e-11	-6.17766e-11	-1.26863e-09
		0.01928	-1.99682e-11	-6.11526e-11	-1.27239e-09
		0.0193	-2.18402e-11	-6.36486e-11	-1.27489e-09
		0.01932	-2.30882e-11	-6.17766e-11	-1.27677e-09
		0.01934	-2.49602e-11	-6.17766e-11	-1.27364e-09
		0.01936	-2.49602e-11	-6.24006e-11	-1.27239e-09
		0.01938	-2.24642e-11	-6.11526e-11	-1.27113e-09
		0.0194	-2.12162e-11	-6.30246e-11	-1.26675e-09
		0.01942	-1.93442e-11	-6.24006e-11	-1.26612e-09
		0.01944	-1.99682e-11	-6.24006e-11	-1.26361e-09
		0.01946	-1.93442e-11	-6.30246e-11	-1.26048e-09
		0.01948	-1.80962e-11	-6.17766e-11	-1.25797e-09
		0.0195	-1.87202e-11	-6.05286e-11	-1.25546e-09
		0.01952	-1.93442e-11	-5.99046e-11	-1.25296e-09
		0.01954	-1.74722e-11	-5.86565e-11	-1.25108e-09
		0.01956	-1.80962e-11	-5.92806e-11	-1.25108e-09
		0.01958	-1.74722e-11	-5.86565e-11	-1.25421e-09
		0.0196	-1.68482e-11	-5.80325e-11	-1.25734e-09
		0.01962	-1.74722e-11	-5.74085e-11	-1.26048e-09
		0.01964	-1.87202e-11	-5.80325e-11	-1.26612e-09
		0.01966	-1.80962e-11	-5.99046e-11	-1.27113e-09
		0.01968	-1.74722e-11	-6.11526e-11	-1.27552e-09
		0.0197	-1.93442e-11	-6.24006e-11	-1.27865e-09
		0.01972	-1.87202e-11	-6.17766e-11	-1.28116e-09
		0.01974	-1.80962e-11	-6.36486e-11	-1.28179e-09
		0.01976	-1.99682e-11	-6.24006e-11	-1.28116e-09
		0.01978	-1.99682e-11	-6.11526e-11	-1.27991e-09
		0.0198	-2.05922e-11	-6.17766e-11	-1.27677e-09
		0.01982	-2.12162e-11	-5.99046e-11	-1.27552e-09
		0.01984	-2.18402e-11	-5.80325e-11	-1.26925e-09
		0.01986	-2.18402e-11	-5.74085e-11	-1.26612e-09
		0.01988	-2.05922e-11	-5.67845e-11	-1.26236e-09
		0.0199	-1.99682e-11	-5.55365e-11	-1.25922e-09
		0.01992	-2.12162e-11	-5.55365e-11	-1.25797e-09
		0.01994	-2.12162e-11	-5.55365e-11	-1.25609e-09
		0.01996	-2.18402e-11	-5.74085e-11	-1.2586e-09
		0.01998	-2.30882e-11	-5.74085e-11	-1.2611e-09
		0.02	-2.24642e-11	-5.74085e-11	-1.26173e-09
		0.02002	-2.37122e-11	-5.92806e-11	-1.26048e-09
		0.02004	-2.05922e-11	-5.92806e-11	-1.25922e-09
		0.02006	-1.93442e-11	-5.92806e-11	-1.25609e-09
		0.02008	-1.87202e-11	-5.92806e-11	-1.25296e-09
		0.0201	-1.80962e-11	-5.92806e-11	-1.2517e-09
		0.02012	-1.87202e-11	-5.99046e-11	-1.2492e-09
		0.02014	-2.05922e-11	-5.92806e-11	-1.2517e-09
		0.02016	-1.87202e-11	-5.99046e-11	-1.25296e-09
		0.02018	-1.99682e-11	-6.11526e-11	-1.25672e-09
		0.0202	-1.93442e-11	-6.11526e-11	-1.25672e-09
		0.02022	-1.80962e-11	-5.99046e-11	-1.26048e-09
		0.02024	-1.74722e-11	-6.11526e-11	-1.26173e-09
		0.02026	-1.56001e-11	-6.30246e-11	-1.26298e-09
		0.02028	-1.62242e-11	-6.36486e-11	-1.26424e-09
		0.0203	-1.80962e-11	-6.24006e-11	-1.26486e-09
		0.02032	-1.74722e-11	-6.42726e-11	-1.26424e-09
		0.02034	-1.87202e-11	-6.36486e-11	-1.26549e-09
		0.02036	-1.80962e-11	-6.36486e-11	-1.26486e-09
		0.02038	-1.68482e-11	-6.24006e-11	-1.26424e-09
		0.0204	-1.56001e-11	-6.48966e-11	-1.26361e-09
		0.02042	-1.74722e-11	-6.61446e-11	-1.26424e-09
		0.02044	-1.80962e-11	-6.73926e-11	-1.26737e-09
		0.02046	-1.99682e-11	-6.80166e-11	-1.26988e-09
		0.02048	-2.37122e-11	-6.80166e-11	-1.27301e-09
		0.0205	-2.49602e-11	-6.86406e-11	-1.27427e-09
		0.02052	-2.49602e-11	-7.11367e-11	-1.27928e-09
		0.02054	-2.30882e-11	-7.23847e-11	-1.28053e-09
		0.02056	-2.30882e-11	-7.23847e-11	-1.28492e-09
		0.02058	-2.30882e-11	-7.17607e-11	-1.2843e-09
		0.0206	-2.37122e-11	-7.30087e-11	-1.28179e-09
		0.02062	-2.30882e-11	-7.42567e-11	-1.28304e-09
		0.02064	-2.30882e-11	-7.48807e-11	-1.28179e-09
		0.02066	-2.24642e-11	-7.80007e-11	-1.28179e-09
		0.02068	-2.05922e-11	-7.98727e-11	-1.2843e-09
		0.0207	-2.05922e-11	-8.17448e-11	-1.28868e-09
		0.02072	-1.87202e-11	-8.36168e-11	-1.29307e-09
		0.02074	-1.80962e-11	-8.48648e-11	-1.29432e-09
		0.02076	-1.93442e-11	-8.67368e-11	-1.29432e-09
		0.02078	-1.93442e-11	-8.61128e-11	-1.29495e-09
		0.0208	-1.99682e-11	-8.48648e-11	-1.2937e-09
		0.02082	-2.18402e-11	-8.42408e-11	-1.2962e-09
		0.02084	-2.24642e-11	-8.42408e-11	-1.29558e-09
		0.02086	-2.05922e-11	-8.23688e-11	-1.29558e-09
		0.02088	-1.80962e-11	-8.23688e-11	-1.29683e-09
		0.0209	-1.74722e-11	-8.11208e-11	-1.29683e-09
		0.02092	-1.74722e-11	-7.98727e-11	-1.29432e-09
		0.02094	-1.62242e-11	-7.98727e-11	-1.29432e-09
		0.02096	-1.68482e-11	-7.86247e-11	-1.2937e-09
		0.02098	-1.68482e-11	-7.61287e-11	-1.29558e-09
		0.021	-1.80962e-11	-7.42567e-11	-1.29746e-09
		0.02102	-1.87202e-11	-7.17607e-11	-1.29871e-09
		0.02104	-1.87202e-11	-6.92646e-11	-1.30122e-09
		0.02106	-1.80962e-11	-6.98887e-11	-1.30247e-09
		0.02108	-1.80962e-11	-6.80166e-11	-1.3031e-09
		0.0211	-1.87202e-11	-6.55206e-11	-1.30373e-09
		0.02112	-1.74722e-11	-6.42726e-11	-1.30373e-09
		0.02114	-1.93442e-11	-6.24006e-11	-1.3031e-09
		0.02116	-2.05922e-11	-6.30246e-11	-1.30185e-09
		0.02118	-1.93442e-11	-6.30246e-11	-1.29997e-09
		0.0212	-1.87202e-11	-6.48966e-11	-1.29683e-09
		0.02122	-1.87202e-11	-6.73926e-11	-1.29056e-09
		0.02124	-1.80962e-11	-7.05127e-11	-1.28492e-09
		0.02126	-1.74722e-11	-7.17607e-11	-1.28179e-09
		0.02128	-1.93442e-11	-7.42567e-11	-1.27615e-09
		0.0213	-2.18402e-11	-7.48807e-11	-1.27239e-09
		0.02132	-2.24642e-11	-7.73767e-11	-1.26863e-09
		0.02134	-2.37122e-11	-7.73767e-11	-1.26737e-09
		0.02136	-2.18402e-11	-7.67527e-11	-1.26737e-09
		0.02138	-2.18402e-11	-7.42567e-11	-1.26737e-09
		0.0214	-1.99682e-11	-7.36327e-11	-1.26863e-09
		0.02142	-2.12162e-11	-7.05127e-11	-1.26988e-09
		0.02144	-1.93442e-11	-6.92646e-11	-1.27176e-09
		0.02146	-1.87202e-11	-6.73926e-11	-1.27364e-09
		0.02148	-1.80962e-11	-6.73926e-11	-1.27427e-09
		0.0215	-1.74722e-11	-6.67686e-11	-1.27301e-09
		0.02152	-1.74722e-11	-6.67686e-11	-1.27239e-09
		0.02154	-1.62242e-11	-6.67686e-11	-1.27113e-09
		0.02156	-1.49761e-11	-6.67686e-11	-1.26988e-09
		0.02158	-1.56001e-11	-6.67686e-11	-1.26549e-09
		0.0216	-1.68482e-11	-6.61446e-11	-1.26486e-09
		0.02162	-1.74722e-11	-6.48966e-11	-1.26361e-09
		0.02164	-1.80962e-11	-6.61446e-11	-1.26236e-09
		0.02166	-1.74722e-11	-6.67686e-11	-1.25985e-09
		0.02168	-1.87202e-11	-6.80166e-11	-1.26048e-09
		0.0217	-1.68482e-11	-6.73926e-11	-1.26048e-09
		0.02172	-1.49761e-11	-6.86406e-11	-1.26048e-09
		0.02174	-1.56001e-11	-6.86406e-11	-1.26048e-09
		0.02176	-1.80962e-11	-6.86406e-11	-1.26236e-09
		0.02178	-1.80962e-11	-6.67686e-11	-1.26675e-09
		0.0218	-1.93442e-11	-6.61446e-11	-1.268e-09
		0.02182	-2.05922e-11	-6.36486e-11	-1.27239e-09
		0.02184	-2.30882e-11	-6.11526e-11	-1.27301e-09
		0.02186	-2.18402e-11	-6.05286e-11	-1.27301e-09
		0.02188	-2.05922e-11	-5.80325e-11	-1.27051e-09
		0.0219	-1.93442e-11	-5.74085e-11	-1.26612e-09
		0.02192	-1.80962e-11	-5.61605e-11	-1.2611e-09
		0.02194	-1.62242e-11	-5.74085e-11	-1.25672e-09
		0.02196	-1.56001e-11	-5.67845e-11	-1.2517e-09
		0.02198	-1.49761e-11	-5.74085e-11	-1.24669e-09
		0.022	-1.56001e-11	-5.61605e-11	-1.2423e-09
		0.02202	-1.80962e-11	-5.86565e-11	-1.2423e-09
		0.02204	-1.62242e-11	-5.80325e-11	-1.24293e-09
		0.02206	-1.68482e-11	-5.86565e-11	-1.24355e-09
		0.02208	-1.68482e-11	-5.92806e-11	-1.24606e-09
		0.0221	-1.87202e-11	-5.80325e-11	-1.24982e-09
		0.02212	-1.93442e-11	-5.86565e-11	-1.2517e-09
		0.02214	-1.93442e-11	-5.74085e-11	-1.25421e-09
		0.02216	-2.12162e-11	-5.67845e-11	-1.25358e-09
		0.02218	-2.05922e-11	-5.80325e-11	-1.25672e-09
		0.0222	-1.99682e-11	-5.86565e-11	-1.25797e-09
		0.02222	-2.05922e-11	-5.92806e-11	-1.2586e-09
		0.02224	-2.12162e-11	-5.92806e-11	-1.25672e-09
		0.02226	-2.12162e-11	-5.99046e-11	-1.25358e-09
		0.02228	-2.12162e-11	-5.92806e-11	-1.24857e-09
		0.0223	-1.99682e-11	-5.86565e-11	-1.24543e-09
		0.02232	-2.18402e-11	-5.86565e-11	-1.24481e-09
		0.02234	-2.18402e-11	-6.05286e-11	-1.24669e-09
		0.02236	-2.18402e-11	-6.11526e-11	-1.25108e-09
		0.02238	-1.99682e-11	-6.11526e-11	-1.25484e-09
		0.0224	-1.80962e-11	-6.17766e-11	-1.26173e-09
		0.02242	-1.74722e-11	-6.24006e-11	-1.26675e-09
		0.02244	-1.62242e-11	-6.30246e-11	-1.27364e-09
		0.02246	-1.80962e-11	-6.36486e-11	-1.27803e-09
		0.02248	-1.87202e-11	-6.48966e-11	-1.28116e-09
		0.0225	-1.99682e-11	-6.48966e-11	-1.28304e-09
		0.02252	-1.99682e-11	-6.48966e-11	-1.28116e-09
		0.02254	-2.18402e-11	-6.24006e-11	-1.28179e-09
		0.02256	-2.12162e-11	-6.05286e-11	-1.28116e-09
		0.02258	-2.18402e-11	-5.74085e-11	-1.28242e-09
		0.0226	-2.37122e-11	-5.86565e-11	-1.28304e-09
		0.02262	-2.43362e-11	-5.99046e-11	-1.28555e-09
		0.02264	-2.49602e-11	-6.24006e-11	-1.28618e-09
		0.02266	-2.49602e-11	-6.36486e-11	-1.28743e-09
		0.02268	-2.43362e-11	-6.55206e-11	-1.28931e-09
		0.0227	-2.55842e-11	-6.42726e-11	-1.29182e-09
		0.02272	-2.24642e-11	-6.48966e-11	-1.29244e-09
		0.02274	-1.99682e-11	-6.30246e-11	-1.29432e-09
		0.02276	-1.74722e-11	-6.11526e-11	-1.29244e-09
		0.02278	-1.49761e-11	-6.11526e-11	-1.29244e-09
		0.0228	-1.56001e-11	-6.11526e-11	-1.28994e-09
		0.02282	-1.49761e-11	-6.11526e-11	-1.2868e-09
		0.02284	-1.49761e-11	-6.11526e-11	-1.28618e-09
		0.02286	-1.43521e-11	-6.17766e-11	-1.28304e-09
		0.02288	-1.43521e-11	-6.11526e-11	-1.28242e-09
		0.0229	-1.43521e-11	-5.99046e-11	-1.28179e-09
		0.02292	-1.49761e-11	-6.05286e-11	-1.27803e-09
		0.02294	-1.43521e-11	-5.80325e-11	-1.27552e-09
		0.02296	-1.49761e-11	-5.67845e-11	-1.27427e-09
		0.02298	-1.43521e-11	-5.80325e-11	-1.27239e-09
		0.023	-1.49761e-11	-5.74085e-11	-1.27176e-09
		0.02302	-1.49761e-11	-5.80325e-11	-1.26988e-09
		0.02304	-1.43521e-11	-5.67845e-11	-1.26737e-09
		0.02306	-1.37281e-11	-5.80325e-11	-1.26486e-09
		0.02308	-1.37281e-11	-5.67845e-11	-1.26361e-09
		0.0231	-1.43521e-11	-5.61605e-11	-1.26236e-09
		0.02312	-1.37281e-11	-5.61605e-11	-1.26298e-09
		0.02314	-1.56001e-11	-5.74085e-11	-1.26173e-09
		0.02316	-1.68482e-11	-5.86565e-11	-1.26048e-09
		0.02318	-1.87202e-11	-5.99046e-11	-1.26048e-09
		0.0232	-1.74722e-11	-6.05286e-11	-1.26236e-09
		0.02322	-1.80962e-11	-6.24006e-11	-1.26424e-09
		0.02324	-1.56001e-11	-6.30246e-11	-1.26737e-09
		0.02326	-1.62242e-11	-6.17766e-11	-1.27051e-09
		0.02328	-1.56001e-11	-6.17766e-11	-1.27427e-09
		0.0233	-1.87202e-11	-5.99046e-11	-1.27301e-09
		0.02332	-2.05922e-11	-6.05286e-11	-1.27239e-09
		0.02334	-2.05922e-11	-5.99046e-11	-1.27301e-09
		0.02336	-2.24642e-11	-5.74085e-11	-1.27239e-09
		0.02338	-2.18402e-11	-5.80325e-11	-1.27176e-09
		0.0234	-2.24642e-11	-5.67845e-11	-1.27301e-09
		0.02342	-2.05922e-11	-5.67845e-11	-1.27301e-09
		0.02344	-2.18402e-11	-5.61605e-11	-1.27364e-09
		0.02346	-2.12162e-11	-5.80325e-11	-1.27239e-09
		0.02348	-1.99682e-11	-6.05286e-11	-1.27051e-09
		0.0235	-1.87202e-11	-5.99046e-11	-1.26925e-09
		0.02352	-1.74722e-11	-5.99046e-11	-1.26863e-09
		0.02354	-1.68482e-11	-5.86565e-11	-1.26737e-09
		0.02356	-1.56001e-11	-5.67845e-11	-1.268e-09
		0.02358	-1.62242e-11	-5.74085e-11	-1.26988e-09
		0.0236	-1.56001e-11	-5.67845e-11	-1.27176e-09
		0.02362	-1.49761e-11	-5.99046e-11	-1.27552e-09
		0.02364	-1.68482e-11	-5.99046e-11	-1.2774e-09
		0.02366	-1.80962e-11	-6.11526e-11	-1.27991e-09
		0.02368	-1.80962e-11	-6.05286e-11	-1.28242e-09
		0.0237	-1.87202e-11	-5.74085e-11	-1.28367e-09
		0.02372	-1.80962e-11	-5.92806e-11	-1.28492e-09
		0.02374	-1.49761e-11	-5.74085e-11	-1.28618e-09
		0.02376	-1.43521e-11	-5.67845e-11	-1.2868e-09
		0.02378	-1.43521e-11	-5.55365e-11	-1.28618e-09
		0.0238	-1.56001e-11	-5.49125e-11	-1.28743e-09
		0.02382	-1.68482e-11	-5.42885e-11	-1.28868e-09
		0.02384	-1.62242e-11	-5.42885e-11	-1.29244e-09
		0.02386	-1.74722e-11	-5.61605e-11	-1.29182e-09
		0.02388	-1.62242e-11	-5.67845e-11	-1.28994e-09
		0.0239	-1.62242e-11	-5.74085e-11	-1.28931e-09
		0.02392	-1.43521e-11	-5.61605e-11	-1.2868e-09
		0.02394	-1.56001e-11	-5.86565e-11	-1.28367e-09
		0.02396	-1.68482e-11	-5.92806e-11	-1.28304e-09
		0.02398	-1.99682e-11	-6.05286e-11	-1.28304e-09
		0.024	-1.99682e-11	-6.17766e-11	-1.28367e-09
		0.02402	-1.99682e-11	-6.24006e-11	-1.2843e-09
		0.02404	-2.05922e-11	-6.24006e-11	-1.28555e-09
		0.02406	-1.93442e-11	-6.11526e-11	-1.28555e-09
		0.02408	-1.74722e-11	-6.17766e-11	-1.28367e-09
		0.0241	-1.62242e-11	-6.05286e-11	-1.28179e-09
		0.02412	-1.49761e-11	-5.86565e-11	-1.28053e-09
		0.02414	-1.49761e-11	-5.86565e-11	-1.28053e-09
		0.02416	-1.56001e-11	-6.05286e-11	-1.28116e-09
		0.02418	-1.62242e-11	-6.05286e-11	-1.28116e-09
		0.0242	-1.74722e-11	-6.11526e-11	-1.27865e-09
		0.02422	-1.68482e-11	-6.17766e-11	-1.27552e-09
		0.02424	-1.74722e-11	-6.05286e-11	-1.27552e-09
		0.02426	-1.74722e-11	-5.92806e-11	-1.27552e-09
		0.02428	-1.68482e-11	-5.80325e-11	-1.27489e-09
		0.0243	-1.80962e-11	-5.92806e-11	-1.27615e-09
		0.02432	-1.99682e-11	-5.86565e-11	-1.27803e-09
		0.02434	-1.68482e-11	-6.05286e-11	-1.27991e-09
		0.02436	-1.68482e-11	-6.17766e-11	-1.28053e-09
		0.02438	-1.74722e-11	-6.36486e-11	-1.28242e-09
		0.0244	-1.74722e-11	-6.17766e-11	-1.28116e-09
		0.02442	-1.62242e-11	-6.17766e-11	-1.28179e-09
		0.02444	-1.68482e-11	-6.11526e-11	-1.28116e-09
		0.02446	-1.74722e-11	-6.24006e-11	-1.27991e-09
		0.02448	-1.93442e-11	-6.24006e-11	-1.2774e-09
		0.0245	-2.12162e-11	-6.42726e-11	-1.27489e-09
		0.02452	-2.12162e-11	-6.48966e-11	-1.27176e-09
		0.02454	-2.12162e-11	-6.48966e-11	-1.26988e-09
		0.02456	-1.80962e-11	-6.48966e-11	-1.26675e-09
		0.02458	-1.74722e-11	-6.36486e-11	-1.26675e-09
		0.0246	-1.74722e-11	-6.17766e-11	-1.26549e-09
		0.02462	-1.49761e-11	-5.99046e-11	-1.26486e-09
		0.02464	-1.56001e-11	-5.86565e-11	-1.26424e-09
		0.02466	-1.74722e-11	-5.80325e-11	-1.26549e-09
		0.02468	-1.74722e-11	-5.86565e-11	-1.268e-09
		0.0247	-1.87202e-11	-5.80325e-11	-1.27051e-09
		0.02472	-1.80962e-11	-5.92806e-11	-1.27427e-09
		0.02474	-1.80962e-11	-5.86565e-11	-1.27677e-09
		0.02476	-1.93442e-11	-5.99046e-11	-1.27803e-09
		0.02478	-1.99682e-11	-5.92806e-11	-1.27803e-09
		0.0248	-1.87202e-11	-5.74085e-11	-1.27865e-09
		0.02482	-2.05922e-11	-5.67845e-11	-1.28053e-09
		0.02484	-1.93442e-11	-5.92806e-11	-1.28367e-09
		0.02486	-1.87202e-11	-6.05286e-11	-1.28618e-09
		0.02488	-1.80962e-11	-6.05286e-11	-1.29119e-09
		0.0249	-1.74722e-11	-6.24006e-11	-1.29432e-09
		0.02492	-1.74722e-11	-6.17766e-11	-1.29808e-09
		0.02494	-1.80962e-11	-5.92806e-11	-1.29808e-09
		0.02496	-1.87202e-11	-5.80325e-11	-1.29808e-09
		0.02498	-1.87202e-11	-5.67845e-11	-1.29934e-09
		0.025	-1.87202e-11	-5.61605e-11	-1.30059e-09
		0.02502	-1.80962e-11	-5.55365e-11	-1.30373e-09
		0.02504	-1.56001e-11	-5.67845e-11	-1.30247e-09
		0.02506	-1.49761e-11	-5.74085e-11	-1.30561e-09
		0.02508	-1.24801e-11	-5.61605e-11	-1.30874e-09
		0.0251	-1.37281e-11	-5.61605e-11	-1.31125e-09
		0.02512	-1.49761e-11	-5.67845e-11	-1.31313e-09
		0.02514	-1.49761e-11	-5.74085e-11	-1.31438e-09
		0.02516	-1.62242e-11	-5.74085e-11	-1.31626e-09
		0.02518	-1.74722e-11	-5.74085e-11	-1.31626e-09
		0.0252	-1.80962e-11	-5.99046e-11	-1.31626e-09
		0.02522	-1.80962e-11	-5.92806e-11	-1.31626e-09
		0.02524	-1.68482e-11	-5.86565e-11	-1.31626e-09
		0.02526	-1.56001e-11	-5.74085e-11	-1.31187e-09
		0.02528	-1.68482e-11	-5.86565e-11	-1.30811e-09
		0.0253	-1.56001e-11	-5.92806e-11	-1.30435e-09
		0.02532	-1.62242e-11	-6.11526e-11	-1.30247e-09
		0.02534	-1.56001e-11	-6.11526e-11	-1.29997e-09
		0.02536	-1.62242e-11	-6.17766e-11	-1.29934e-09
		0.02538	-1.74722e-11	-6.24006e-11	-1.29683e-09
		0.0254	-1.80962e-11	-6.24006e-11	-1.29307e-09
		0.02542	-1.74722e-11	-6.05286e-11	-1.29056e-09
		0.02544	-1.80962e-11	-5.92806e-11	-1.28868e-09
		0.02546	-1.87202e-11	-5.92806e-11	-1.28492e-09
		0.02548	-1.87202e-11	-5.74085e-11	-1.28555e-09
		0.0255	-2.05922e-11	-5.80325e-11	-1.2843e-09
		0.02552	-2.05922e-11	-5.67845e-11	-1.28555e-09
		0.02554	-1.99682e-11	-5.61605e-11	-1.2843e-09
		0.02556	-1.93442e-11	-5.61605e-11	-1.28242e-09
		0.02558	-1.80962e-11	-5.74085e-11	-1.27928e-09
		0.0256	-1.49761e-11	-5.67845e-11	-1.27615e-09
		0.02562	-1.62242e-11	-5.80325e-11	-1.27427e-09
		0.02564	-1.62242e-11	-5.86565e-11	-1.27176e-09
		0.02566	-1.56001e-11	-5.80325e-11	-1.27176e-09
		0.02568	-1.68482e-11	-5.80325e-11	-1.26925e-09
		0.0257	-1.62242e-11	-5.67845e-11	-1.26612e-09
		0.02572	-1.43521e-11	-5.74085e-11	-1.26361e-09
		0.02574	-1.37281e-11	-5.67845e-11	-1.26549e-09
		0.02576	-1.43521e-11	-5.67845e-11	-1.26737e-09
		0.02578	-1.62242e-11	-5.61605e-11	-1.26988e-09
		0.0258	-1.56001e-11	-5.42885e-11	-1.26988e-09
		0.02582	-1.56001e-11	-5.55365e-11	-1.27051e-09
		0.02584	-1.56001e-11	-5.42885e-11	-1.26863e-09
		0.02586	-1.49761e-11	-5.49125e-11	-1.26612e-09
		0.02588	-1.37281e-11	-5.67845e-11	-1.26486e-09
		0.0259	-1.31041e-11	-5.67845e-11	-1.26549e-09
		0.02592	-1.12321e-11	-5.86565e-11	-1.26612e-09
		0.02594	-1.12321e-11	-5.80325e-11	-1.26925e-09
		0.02596	-1.24801e-11	-5.80325e-11	-1.26988e-09
		0.02598	-1.31041e-11	-5.67845e-11	-1.27364e-09
		0.026	-1.49761e-11	-5.74085e-11	-1.27489e-09
		0.02602	-1.49761e-11	-5.55365e-11	-1.27677e-09
		0.02604	-1.56001e-11	-5.61605e-11	-1.27928e-09
		0.02606	-1.62242e-11	-5.49125e-11	-1.28179e-09
		0.02608	-1.62242e-11	-5.42885e-11	-1.28618e-09
		0.0261	-1.62242e-11	-5.61605e-11	-1.28931e-09
		0.02612	-1.62242e-11	-5.61605e-11	-1.29307e-09
		0.02614	-1.56001e-11	-5.61605e-11	-1.29558e-09
		0.02616	-1.43521e-11	-5.74085e-11	-1.29808e-09
		0.02618	-1.49761e-11	-5.92806e-11	-1.2962e-09
		0.0262	-1.37281e-11	-5.86565e-11	-1.2937e-09
		0.02622	-1.49761e-11	-5.99046e-11	-1.29244e-09
		0.02624	-1.49761e-11	-5.99046e-11	-1.28994e-09
		0.02626	-1.56001e-11	-5.86565e-11	-1.29119e-09
		0.02628	-1.56001e-11	-5.86565e-11	-1.29056e-09
		0.0263	-1.56001e-11	-5.61605e-11	-1.28931e-09
		0.02632	-1.74722e-11	-5.61605e-11	-1.28806e-09
		0.02634	-1.74722e-11	-5.55365e-11	-1.2843e-09
		0.02636	-1.80962e-11	-5.24165e-11	-1.28053e-09
		0.02638	-1.49761e-11	-5.17925e-11	-1.27552e-09
		0.0264	-1.43521e-11	-5.24165e-11	-1.27364e-09
		0.02642	-1.24801e-11	-5.11685e-11	-1.27113e-09
		0.02644	-1.18561e-11	-5.24165e-11	-1.26925e-09
		0.02646	-1.24801e-11	-5.42885e-11	-1.27051e-09
		0.02648	-1.31041e-11	-5.49125e-11	-1.27113e-09
		0.0265	-1.18561e-11	-5.17925e-11	-1.27364e-09
		0.02652	-1.49761e-11	-5.24165e-11	-1.27552e-09
		0.02654	-1.49761e-11	-5.17925e-11	-1.27677e-09
		0.02656	-1.56001e-11	-5.36645e-11	-1.27928e-09
		0.02658	-1.56001e-11	-5.36645e-11	-1.28053e-09
		0.0266	-1.56001e-11	-5.42885e-11	-1.28053e-09
		0.02662	-1.62242e-11	-5.36645e-11	-1.28242e-09
		0.02664	-1.74722e-11	-5.17925e-11	-1.28304e-09
		0.02666	-1.80962e-11	-5.42885e-11	-1.28367e-09
		0.02668	-1.74722e-11	-5.42885e-11	-1.28618e-09
		0.0267	-1.80962e-11	-5.55365e-11	-1.28806e-09
		0.02672	-1.80962e-11	-5.55365e-11	-1.29056e-09
		0.02674	-1.87202e-11	-5.55365e-11	-1.28868e-09
		0.02676	-1.80962e-11	-5.55365e-11	-1.28806e-09
		0.02678	-1.87202e-11	-5.61605e-11	-1.2868e-09
		0.0268	-1.99682e-11	-5.61605e-11	-1.2868e-09
		0.02682	-1.99682e-11	-5.61605e-11	-1.28618e-09
		0.02684	-1.87202e-11	-5.49125e-11	-1.28492e-09
		0.02686	-1.80962e-11	-5.55365e-11	-1.28618e-09
		0.02688	-1.43521e-11	-5.67845e-11	-1.28555e-09
		0.0269	-1.18561e-11	-5.67845e-11	-1.28931e-09
		0.02692	-1.12321e-11	-5.86565e-11	-1.28868e-09
		0.02694	-9.98409e-12	-5.99046e-11	-1.28806e-09
		0.02696	-1.12321e-11	-6.24006e-11	-1.28555e-09
		0.02698	-1.24801e-11	-6.17766e-11	-1.27991e-09
		0.027	-1.43521e-11	-6.24006e-11	-1.27489e-09
		0.02702	-1.49761e-11	-6.17766e-11	-1.27239e-09
		0.02704	-1.56001e-11	-6.24006e-11	-1.26675e-09
		0.02706	-1.68482e-11	-6.36486e-11	-1.2611e-09
		0.02708	-1.62242e-11	-6.36486e-11	-1.25484e-09
		0.0271	-1.74722e-11	-6.42726e-11	-1.2517e-09
		0.02712	-1.62242e-11	-6.42726e-11	-1.24606e-09
		0.02714	-1.74722e-11	-6.24006e-11	-1.2423e-09
		0.02716	-1.80962e-11	-6.17766e-11	-1.24042e-09
		0.02718	-1.87202e-11	-6.11526e-11	-1.23979e-09
		0.0272	-1.93442e-11	-5.99046e-11	-1.23917e-09
		0.02722	-1.80962e-11	-6.11526e-11	-1.24105e-09
		0.02724	-1.87202e-11	-6.11526e-11	-1.2423e-09
		0.02726	-1.74722e-11	-5.80325e-11	-1.24543e-09
		0.02728	-1.80962e-11	-5.61605e-11	-1.2492e-09
		0.0273	-1.93442e-11	-5.49125e-11	-1.25233e-09
		0.02732	-2.12162e-11	-5.67845e-11	-1.25484e-09
		0.02734	-2.12162e-11	-5.61605e-11	-1.25609e-09
		0.02736	-1.93442e-11	-5.74085e-11	-1.25609e-09
		0.02738	-1.80962e-11	-5.61605e-11	-1.25358e-09
		0.0274	-1.62242e-11	-5.86565e-11	-1.25233e-09
		0.02742	-1.62242e-11	-5.86565e-11	-1.24982e-09
		0.02744	-1.43521e-11	-5.74085e-11	-1.24543e-09
		0.02746	-1.56001e-11	-5.80325e-11	-1.24543e-09
		0.02748	-1.56001e-11	-5.80325e-11	-1.24293e-09
		0.0275	-1.56001e-11	-5.80325e-11	-1.23917e-09
		0.02752	-1.68482e-11	-6.11526e-11	-1.23603e-09
		0.02754	-1.74722e-11	-6.11526e-11	-1.23541e-09
		0.02756	-1.62242e-11	-6.05286e-11	-1.23603e-09
		0.02758	-1.62242e-11	-6.05286e-11	-1.23917e-09
		0.0276	-1.49761e-11	-5.99046e-11	-1.2423e-09
		0.02762	-1.37281e-11	-6.11526e-11	-1.24669e-09
		0.02764	-1.43521e-11	-6.30246e-11	-1.24857e-09
		0.02766	-1.49761e-11	-6.11526e-11	-1.2517e-09
		0.02768	-1.49761e-11	-6.24006e-11	-1.2517e-09
		0.0277	-1.49761e-11	-6.11526e-11	-1.25484e-09
		0.02772	-1.37281e-11	-6.05286e-11	-1.25922e-09
		0.02774	-1.37281e-11	-5.92806e-11	-1.26298e-09
		0.02776	-1.49761e-11	-5.92806e-11	-1.26549e-09
		0.02778	-1.62242e-11	-5.80325e-11	-1.26737e-09
		0.0278	-1.80962e-11	-5.61605e-11	-1.26863e-09
		0.02782	-1.74722e-11	-5.67845e-11	-1.27176e-09
		0.02784	-1.74722e-11	-5.80325e-11	-1.27113e-09
		0.02786	-1.74722e-11	-6.05286e-11	-1.26925e-09
		0.02788	-1.68482e-11	-5.99046e-11	-1.26925e-09
		0.0279	-1.68482e-11	-5.92806e-11	-1.26737e-09
		0.02792	-1.68482e-11	-5.86565e-11	-1.26612e-09
		0.02794	-1.68482e-11	-5.86565e-11	-1.26737e-09
		0.02796	-1.56001e-11	-5.86565e-11	-1.26549e-09
		0.02798	-1.56001e-11	-5.74085e-11	-1.268e-09
		0.028	-1.62242e-11	-5.74085e-11	-1.26925e-09
		0.02802	-1.49761e-11	-5.80325e-11	-1.27113e-09
		0.02804	-1.43521e-11	-5.92806e-11	-1.27239e-09
		0.02806	-1.18561e-11	-5.86565e-11	-1.27552e-09
		0.02808	-1.18561e-11	-5.86565e-11	-1.27865e-09
		0.0281	-1.24801e-11	-6.05286e-11	-1.28116e-09
		0.02812	-1.37281e-11	-5.99046e-11	-1.28367e-09
		0.02814	-1.49761e-11	-5.99046e-11	-1.28743e-09
		0.02816	-1.74722e-11	-5.99046e-11	-1.28931e-09
		0.02818	-1.62242e-11	-6.05286e-11	-1.28994e-09
		0.0282	-1.74722e-11	-6.05286e-11	-1.28868e-09
		0.02822	-1.56001e-11	-5.86565e-11	-1.28618e-09
		0.02824	-1.43521e-11	-5.61605e-11	-1.28367e-09
		0.02826	-1.12321e-11	-5.61605e-11	-1.27991e-09
		0.02828	-9.36009e-12	-5.49125e-11	-1.27615e-09
		0.0283	-8.73608e-12	-5.49125e-11	-1.27427e-09
		0.02832	-9.36009e-12	-5.61605e-11	-1.27301e-09
		0.02834	-8.11208e-12	-5.42885e-11	-1.26988e-09
		0.02836	-1.12321e-11	-5.49125e-11	-1.26925e-09
		0.02838	-9.98409e-12	-5.42885e-11	-1.26737e-09
		0.0284	-9.98409e-12	-5.55365e-11	-1.26486e-09
		0.02842	-1.24801e-11	-5.80325e-11	-1.26361e-09
		0.02844	-1.24801e-11	-5.99046e-11	-1.26424e-09
		0.02846	-1.49761e-11	-6.05286e-11	-1.26612e-09
		0.02848	-1.56001e-11	-6.05286e-11	-1.268e-09
		0.0285	-1.56001e-11	-6.24006e-11	-1.268e-09
		0.02852	-1.62242e-11	-6.30246e-11	-1.268e-09
		0.02854	-1.62242e-11	-6.17766e-11	-1.26612e-09
		0.02856	-1.68482e-11	-6.05286e-11	-1.26424e-09
		0.02858	-1.49761e-11	-5.86565e-11	-1.26298e-09
		0.0286	-1.62242e-11	-5.86565e-11	-1.26236e-09
		0.02862	-1.87202e-11	-5.80325e-11	-1.26549e-09
		0.02864	-1.74722e-11	-5.61605e-11	-1.26925e-09
		0.02866	-1.87202e-11	-5.67845e-11	-1.27239e-09
		0.02868	-1.99682e-11	-5.74085e-11	-1.27677e-09
		0.0287	-1.99682e-11	-5.74085e-11	-1.27803e-09
		0.02872	-2.12162e-11	-5.74085e-11	-1.27677e-09
		0.02874	-2.05922e-11	-5.80325e-11	-1.27615e-09
		0.02876	-1.99682e-11	-5.80325e-11	-1.27239e-09
		0.02878	-2.05922e-11	-5.86565e-11	-1.26988e-09
		0.0288	-1.99682e-11	-5.92806e-11	-1.26675e-09
		0.02882	-1.99682e-11	-5.80325e-11	-1.26236e-09
		0.02884	-1.99682e-11	-5.80325e-11	-1.25922e-09
		0.02886	-1.80962e-11	-5.80325e-11	-1.25734e-09
		0.02888	-1.56001e-11	-5.74085e-11	-1.25609e-09
		0.0289	-1.49761e-11	-5.74085e-11	-1.25609e-09
		0.02892	-1.43521e-11	-5.74085e-11	-1.25985e-09
		0.02894	-1.43521e-11	-5.74085e-11	-1.26048e-09
		0.02896	-1.43521e-11	-5.67845e-11	-1.26236e-09
		0.02898	-1.43521e-11	-5.67845e-11	-1.26486e-09
		0.029	-1.12321e-11	-5.61605e-11	-1.26863e-09
		0.02902	-9.98409e-12	-5.49125e-11	-1.26863e-09
		0.02904	-1.06081e-11	-5.61605e-11	-1.27176e-09
		0.02906	-1.12321e-11	-5.61605e-11	-1.27176e-09
		0.02908	-9.98409e-12	-5.67845e-11	-1.27301e-09
		0.0291	-1.37281e-11	-5.61605e-11	-1.27301e-09
		0.02912	-1.37281e-11	-5.74085e-11	-1.27615e-09
		0.02914	-1.68482e-11	-5.55365e-11	-1.27803e-09
		0.02916	-1.68482e-11	-5.55365e-11	-1.27928e-09
		0.02918	-1.62242e-11	-5.49125e-11	-1.28053e-09
		0.0292	-1.56001e-11	-5.42885e-11	-1.27991e-09
		0.02922	-1.49761e-11	-5.36645e-11	-1.27991e-09
		0.02924	-1.56001e-11	-5.49125e-11	-1.27865e-09
		0.02926	-1.74722e-11	-5.36645e-11	-1.27865e-09
		0.02928	-1.80962e-11	-5.55365e-11	-1.27865e-09
		0.0293	-1.93442e-11	-5.55365e-11	-1.28116e-09
		0.02932	-2.05922e-11	-5.74085e-11	-1.28053e-09
		0.02934	-1.99682e-11	-5.67845e-11	-1.28116e-09
		0.02936	-1.74722e-11	-5.55365e-11	-1.27991e-09
		0.02938	-1.68482e-11	-5.67845e-11	-1.28053e-09
		0.0294	-1.56001e-11	-5.49125e-11	-1.28053e-09
		0.02942	-1.43521e-11	-5.24165e-11	-1.27928e-09
		0.02944	-1.37281e-11	-5.11685e-11	-1.27489e-09
		0.02946	-1.37281e-11	-5.17925e-11	-1.27176e-09
		0.02948	-1.24801e-11	-5.11685e-11	-1.26612e-09
		0.0295	-1.24801e-11	-5.36645e-11	-1.26173e-09
		0.02952	-1.18561e-11	-5.42885e-11	-1.25922e-09
		0.02954	-1.18561e-11	-5.49125e-11	-1.25609e-09
		0.02956	-1.37281e-11	-5.49125e-11	-1.25797e-09
		0.02958	-1.37281e-11	-5.55365e-11	-1.25922e-09
		0.0296	-1.62242e-11	-5.49125e-11	-1.26173e-09
		0.02962	-1.68482e-11	-5.67845e-11	-1.26675e-09
		0.02964	-1.62242e-11	-5.61605e-11	-1.26988e-09
		0.02966	-1.80962e-11	-5.61605e-11	-1.27301e-09
		0.02968	-1.68482e-11	-5.55365e-11	-1.27552e-09
		0.0297	-1.68482e-11	-5.55365e-11	-1.2774e-09
		0.02972	-1.56001e-11	-5.61605e-11	-1.27865e-09
		0.02974	-1.68482e-11	-5.61605e-11	-1.28053e-09
		0.02976	-1.62242e-11	-5.49125e-11	-1.28367e-09
		0.02978	-1.56001e-11	-5.74085e-11	-1.28618e-09
		0.0298	-1.68482e-11	-5.74085e-11	-1.28806e-09
		0.02982	-1.62242e-11	-5.74085e-11	-1.29056e-09
		0.02984	-1.49761e-11	-5.74085e-11	-1.29182e-09
		0.02986	-1.49761e-11	-5.74085e-11	-1.29307e-09
		0.02988	-1.24801e-11	-5.61605e-11	-1.2937e-09
		0.0299	-1.31041e-11	-5.80325e-11	-1.29432e-09
		0.02992	-1.43521e-11	-6.05286e-11	-1.2937e-09
		0.02994	-1.56001e-11	-6.86406e-11	-1.28994e-09
		0.02996	-1.62242e-11	-7.61287e-11	-1.28743e-09
		0.02998	-1.74722e-11	-9.04808e-11	-1.28304e-09
		0.03	-1.74722e-11	-1.04209e-10	-1.27991e-09
		0.03002	-1.74722e-11	-1.17313e-10	-1.27803e-09
		0.03004	-1.87202e-11	-1.29169e-10	-1.27928e-09
		0.03006	-1.62242e-11	-1.36657e-10	-1.27803e-09
		0.03008	-1.62242e-11	-1.43521e-10	-1.2774e-09
		0.0301	-1.62242e-11	-1.44769e-10	-1.2774e-09
		0.03012	-1.68482e-11	-1.44769e-10	-1.27615e-09
		0.03014	-1.74722e-11	-1.42897e-10	-1.27489e-09
		0.03016	-1.74722e-11	-1.40401e-10	-1.27427e-09
		0.03018	-1.56001e-11	-1.35409e-10	-1.27113e-09
		0.0302	-1.43521e-11	-1.30417e-10	-1.26925e-09
		0.03022	-1.31041e-11	-1.26049e-10	-1.268e-09
		0.03024	-1.49761e-11	-1.20433e-10	-1.26549e-09
		0.03026	-1.37281e-11	-1.15441e-10	-1.26298e-09
		0.03028	-1.62242e-11	-1.09825e-10	-1.26236e-09
		0.0303	-1.56001e-11	-1.04209e-10	-1.26236e-09
		0.03032	-1.56001e-11	-9.98409e-11	-1.26048e-09
		0.03034	-1.80962e-11	-9.54729e-11	-1.26048e-09
		0.03036	-1.62242e-11	-8.92328e-11	-1.25609e-09
		0.03038	-1.56001e-11	-8.73608e-11	-1.25609e-09
		0.0304	-1.62242e-11	-8.48648e-11	-1.25233e-09
		0.03042	-1.56001e-11	-8.36168e-11	-1.25296e-09
		0.03044	-1.62242e-11	-7.92487e-11	-1.25233e-09
		0.03046	-1.49761e-11	-7.80007e-11	-1.25546e-09
		0.03048	-1.87202e-11	-7.42567e-11	-1.25922e-09
		0.0305	-1.87202e-11	-7.23847e-11	-1.26361e-09
		0.03052	-1.74722e-11	-7.05127e-11	-1.26549e-09
		0.03054	-1.62242e-11	-6.80166e-11	-1.26737e-09
		0.03056	-1.80962e-11	-6.67686e-11	-1.268e-09
		0.03058	-1.74722e-11	-6.55206e-11	-1.26863e-09
		0.0306	-1.62242e-11	-6.61446e-11	-1.26675e-09
		0.03062	-1.74722e-11	-6.48966e-11	-1.26486e-09
		0.03064	-1.62242e-11	-6.42726e-11	-1.2611e-09
		0.03066	-1.62242e-11	-6.36486e-11	-1.25985e-09
		0.03068	-1.56001e-11	-6.36486e-11	-1.25985e-09
		0.0307	-1.62242e-11	-6.30246e-11	-1.25922e-09
		0.03072	-1.56001e-11	-6.30246e-11	-1.25922e-09
		0.03074	-1.56001e-11	-6.36486e-11	-1.25985e-09
		0.03076	-1.56001e-11	-6.24006e-11	-1.26298e-09
		0.03078	-1.62242e-11	-6.42726e-11	-1.26236e-09
		0.0308	-1.74722e-11	-6.24006e-11	-1.26361e-09
		0.03082	-1.74722e-11	-6.36486e-11	-1.26424e-09
		0.03084	-1.74722e-11	-6.42726e-11	-1.26675e-09
		0.03086	-1.74722e-11	-6.55206e-11	-1.26925e-09
		0.03088	-1.37281e-11	-6.67686e-11	-1.27176e-09
		0.0309	-1.43521e-11	-6.73926e-11	-1.27301e-09
		0.03092	-1.31041e-11	-6.73926e-11	-1.27552e-09
		0.03094	-1.31041e-11	-6.86406e-11	-1.28116e-09
		0.03096	-1.49761e-11	-6.67686e-11	-1.28806e-09
		0.03098	-1.56001e-11	-6.67686e-11	-1.29182e-09
		0.031	-1.62242e-11	-6.48966e-11	-1.2962e-09
		0.03102	-1.56001e-11	-6.24006e-11	-1.30185e-09
		0.03104	-1.49761e-11	-6.17766e-11	-1.30122e-09
		0.03106	-1.37281e-11	-6.05286e-11	-1.3031e-09
		0.03108	-1.43521e-11	-5.99046e-11	-1.30122e-09
		0.0311	-1.37281e-11	-6.11526e-11	-1.3031e-09
		0.03112	-1.43521e-11	-5.92806e-11	-1.30247e-09
		0.03114	-1.80962e-11	-6.05286e-11	-1.30247e-09
		0.03116	-1.93442e-11	-5.99046e-11	-1.30373e-09
		0.03118	-1.80962e-11	-5.86565e-11	-1.30247e-09
		0.0312	-1.99682e-11	-5.86565e-11	-1.30498e-09
		0.03122	-1.80962e-11	-5.80325e-11	-1.30561e-09
		0.03124	-1.74722e-11	-5.92806e-11	-1.30811e-09
		0.03126	-1.62242e-11	-5.92806e-11	-1.3125e-09
		0.03128	-1.68482e-11	-5.99046e-11	-1.31375e-09
		0.0313	-1.74722e-11	-6.11526e-11	-1.31501e-09
		0.03132	-1.80962e-11	-6.24006e-11	-1.31626e-09
		0.03134	-1.68482e-11	-6.17766e-11	-1.31689e-09
		0.03136	-1.87202e-11	-6.24006e-11	-1.31626e-09
		0.03138	-1.87202e-11	-6.17766e-11	-1.31564e-09
		0.0314	-1.87202e-11	-5.92806e-11	-1.31375e-09
		0.03142	-1.93442e-11	-5.80325e-11	-1.3125e-09
		0.03144	-1.93442e-11	-5.61605e-11	-1.31375e-09
		0.03146	-1.99682e-11	-5.74085e-11	-1.31125e-09
		0.03148	-1.99682e-11	-5.67845e-11	-1.30874e-09
		0.0315	-1.87202e-11	-5.86565e-11	-1.30623e-09
		0.03152	-1.68482e-11	-5.92806e-11	-1.30435e-09
		0.03154	-1.56001e-11	-6.05286e-11	-1.3031e-09
		0.03156	-1.37281e-11	-6.05286e-11	-1.30247e-09
		0.03158	-1.49761e-11	-5.99046e-11	-1.30247e-09
		0.0316	-1.43521e-11	-5.92806e-11	-1.30247e-09
		0.03162	-1.62242e-11	-5.92806e-11	-1.30059e-09
		0.03164	-1.74722e-11	-5.99046e-11	-1.29934e-09
		0.03166	-1.80962e-11	-5.99046e-11	-1.2962e-09
		0.03168	-1.74722e-11	-5.99046e-11	-1.29683e-09
		0.0317	-1.56001e-11	-5.92806e-11	-1.29558e-09
		0.03172	-1.24801e-11	-6.05286e-11	-1.29307e-09
		0.03174	-1.24801e-11	-5.99046e-11	-1.29244e-09
		0.03176	-1.37281e-11	-6.05286e-11	-1.29244e-09
		0.03178	-1.24801e-11	-6.05286e-11	-1.29432e-09
		0.0318	-1.43521e-11	-5.99046e-11	-1.2962e-09
		0.03182	-1.49761e-11	-5.92806e-11	-1.29683e-09
		0.03184	-1.56001e-11	-5.92806e-11	-1.2962e-09
		0.03186	-1.43521e-11	-5.99046e-11	-1.29558e-09
		0.03188	-1.43521e-11	-6.05286e-11	-1.29495e-09
		0.0319	-1.37281e-11	-5.99046e-11	-1.29495e-09
		0.03192	-1.37281e-11	-5.99046e-11	-1.29683e-09
		0.03194	-1.49761e-11	-5.99046e-11	-1.2962e-09
		0.03196	-1.68482e-11	-5.99046e-11	-1.29558e-09
		0.03198	-1.80962e-11	-5.99046e-11	-1.2962e-09
		0.032	-1.93442e-11	-5.86565e-11	-1.2962e-09
		0.03202	-1.87202e-11	-5.99046e-11	-1.2962e-09
		0.03204	-1.80962e-11	-5.86565e-11	-1.2962e-09
		0.03206	-1.68482e-11	-5.86565e-11	-1.29432e-09
		0.03208	-1.74722e-11	-5.80325e-11	-1.29495e-09
		0.0321	-1.74722e-11	-5.80325e-11	-1.29307e-09
		0.03212	-1.80962e-11	-5.61605e-11	-1.29307e-09
		0.03214	-1.62242e-11	-5.74085e-11	-1.29119e-09
		0.03216	-1.80962e-11	-5.86565e-11	-1.29244e-09
		0.03218	-1.56001e-11	-5.99046e-11	-1.29056e-09
		0.0322	-1.62242e-11	-6.05286e-11	-1.29119e-09
		0.03222	-1.49761e-11	-5.92806e-11	-1.28931e-09
		0.03224	-1.43521e-11	-6.05286e-11	-1.28931e-09
		0.03226	-1.56001e-11	-5.80325e-11	-1.2868e-09
		0.03228	-1.62242e-11	-5.74085e-11	-1.28492e-09
		0.0323	-1.74722e-11	-5.80325e-11	-1.28304e-09
		0.03232	-1.80962e-11	-5.61605e-11	-1.28304e-09
		0.03234	-1.62242e-11	-5.80325e-11	-1.28367e-09
		0.03236	-1.56001e-11	-5.99046e-11	-1.28179e-09
		0.03238	-1.37281e-11	-6.11526e-11	-1.28116e-09
		0.0324	-1.18561e-11	-5.86565e-11	-1.28053e-09
		0.03242	-1.31041e-11	-5.80325e-11	-1.27928e-09
		0.03244	-1.18561e-11	-5.80325e-11	-1.2774e-09
		0.03246	-1.31041e-11	-5.74085e-11	-1.27803e-09
		0.03248	-1.43521e-11	-5.55365e-11	-1.27427e-09
		0.0325	-1.62242e-11	-5.86565e-11	-1.27364e-09
		0.03252	-1.80962e-11	-5.67845e-11	-1.26988e-09
		0.03254	-1.74722e-11	-5.61605e-11	-1.26486e-09
		0.03256	-1.80962e-11	-5.55365e-11	-1.2611e-09
		0.03258	-1.99682e-11	-5.49125e-11	-1.25922e-09
		0.0326	-2.12162e-11	-5.36645e-11	-1.25734e-09
		0.03262	-2.24642e-11	-5.55365e-11	-1.25734e-09
		0.03264	-2.24642e-11	-5.61605e-11	-1.25672e-09
		0.03266	-2.43362e-11	-5.67845e-11	-1.25484e-09
		0.03268	-2.37122e-11	-5.74085e-11	-1.25296e-09
		0.0327	-2.24642e-11	-5.99046e-11	-1.25296e-09
		0.03272	-1.99682e-11	-5.92806e-11	-1.2517e-09
		0.03274	-2.05922e-11	-5.99046e-11	-1.25358e-09
		0.03276	-1.93442e-11	-5.86565e-11	-1.25484e-09
		0.03278	-1.74722e-11	-5.86565e-11	-1.25546e-09
		0.0328	-1.87202e-11	-5.61605e-11	-1.25421e-09
		0.03282	-1.87202e-11	-5.61605e-11	-1.25108e-09
		0.03284	-1.87202e-11	-5.67845e-11	-1.24982e-09
		0.03286	-1.87202e-11	-5.74085e-11	-1.2492e-09
		0.03288	-1.62242e-11	-5.99046e-11	-1.24982e-09
		0.0329	-1.49761e-11	-5.86565e-11	-1.25358e-09
		0.03292	-1.56001e-11	-5.86565e-11	-1.25797e-09
		0.03294	-1.49761e-11	-5.92806e-11	-1.2611e-09
		0.03296	-1.62242e-11	-5.80325e-11	-1.26424e-09
		0.03298	-1.87202e-11	-5.92806e-11	-1.26486e-09
		0.033	-1.80962e-11	-6.11526e-11	-1.26612e-09
		0.03302	-1.74722e-11	-6.17766e-11	-1.26424e-09
		0.03304	-1.62242e-11	-6.05286e-11	-1.26236e-09
		0.03306	-1.74722e-11	-6.11526e-11	-1.25985e-09
		0.03308	-1.56001e-11	-6.05286e-11	-1.26173e-09
		0.0331	-1.62242e-11	-6.11526e-11	-1.2611e-09
		0.03312	-1.93442e-11	-5.99046e-11	-1.26486e-09
		0.03314	-1.99682e-11	-6.11526e-11	-1.26988e-09
		0.03316	-2.18402e-11	-6.30246e-11	-1.27427e-09
		0.03318	-2.05922e-11	-6.30246e-11	-1.27677e-09
		0.0332	-1.87202e-11	-6.48966e-11	-1.27803e-09
		0.03322	-1.74722e-11	-6.55206e-11	-1.27615e-09
		0.03324	-1.62242e-11	-6.55206e-11	-1.27803e-09
		0.03326	-1.56001e-11	-6.42726e-11	-1.27489e-09
		0.03328	-1.49761e-11	-6.48966e-11	-1.27552e-09
		0.0333	-1.49761e-11	-6.42726e-11	-1.27239e-09
		0.03332	-1.49761e-11	-6.48966e-11	-1.27239e-09
		0.03334	-1.62242e-11	-6.55206e-11	-1.27301e-09
		0.03336	-1.62242e-11	-6.42726e-11	-1.27489e-09
		0.03338	-1.62242e-11	-6.36486e-11	-1.27865e-09
		0.0334	-1.56001e-11	-6.36486e-11	-1.28242e-09
		0.03342	-1.43521e-11	-6.17766e-11	-1.28555e-09
		0.03344	-1.68482e-11	-6.24006e-11	-1.28994e-09
		0.03346	-1.74722e-11	-6.30246e-11	-1.2937e-09
		0.03348	-1.87202e-11	-6.30246e-11	-1.29558e-09
		0.0335	-1.87202e-11	-6.42726e-11	-1.29683e-09
		0.03352	-1.87202e-11	-6.48966e-11	-1.29683e-09
		0.03354	-1.74722e-11	-6.36486e-11	-1.29683e-09
		0.03356	-1.62242e-11	-6.61446e-11	-1.29558e-09
		0.03358	-1.49761e-11	-6.42726e-11	-1.29307e-09
		0.0336	-1.62242e-11	-6.42726e-11	-1.28931e-09
		0.03362	-1.68482e-11	-6.48966e-11	-1.28868e-09
		0.03364	-1.87202e-11	-6.36486e-11	-1.28555e-09
		0.03366	-1.93442e-11	-6.42726e-11	-1.28242e-09
		0.03368	-2.18402e-11	-6.48966e-11	-1.28242e-09
		0.0337	-2.05922e-11	-6.48966e-11	-1.28116e-09
		0.03372	-2.05922e-11	-6.48966e-11	-1.28242e-09
		0.03374	-2.05922e-11	-6.42726e-11	-1.28179e-09
		0.03376	-1.87202e-11	-6.36486e-11	-1.2843e-09
		0.03378	-1.93442e-11	-6.24006e-11	-1.2843e-09
		0.0338	-1.87202e-11	-6.48966e-11	-1.2843e-09
		0.03382	-1.93442e-11	-6.42726e-11	-1.28492e-09
		0.03384	-1.74722e-11	-6.24006e-11	-1.28806e-09
		0.03386	-1.56001e-11	-6.24006e-11	-1.28931e-09
		0.03388	-1.56001e-11	-6.05286e-11	-1.29307e-09
		0.0339	-1.56001e-11	-6.05286e-11	-1.29432e-09
		0.03392	-1.62242e-11	-5.86565e-11	-1.29495e-09
		0.03394	-1.68482e-11	-5.99046e-11	-1.29808e-09
		0.03396	-1.80962e-11	-5.99046e-11	-1.30059e-09
		0.03398	-1.87202e-11	-5.86565e-11	-1.30247e-09
		0.034	-1.68482e-11	-5.80325e-11	-1.30623e-09
		0.03402	-1.74722e-11	-5.86565e-11	-1.30623e-09
		0.03404	-1.56001e-11	-5.86565e-11	-1.30623e-09
		0.03406	-1.56001e-11	-5.86565e-11	-1.30122e-09
		0.03408	-1.56001e-11	-5.92806e-11	-1.29997e-09
		0.0341	-1.62242e-11	-5.86565e-11	-1.29746e-09
		0.03412	-1.74722e-11	-5.55365e-11	-1.29558e-09
		0.03414	-1.87202e-11	-5.67845e-11	-1.29307e-09
		0.03416	-1.99682e-11	-5.61605e-11	-1.29182e-09
		0.03418	-1.93442e-11	-5.80325e-11	-1.28931e-09
		0.0342	-1.87202e-11	-5.92806e-11	-1.28618e-09
		0.03422	-1.87202e-11	-6.05286e-11	-1.28618e-09
		0.03424	-1.93442e-11	-5.99046e-11	-1.28492e-09
		0.03426	-1.93442e-11	-5.99046e-11	-1.2843e-09
		0.03428	-2.05922e-11	-5.86565e-11	-1.28743e-09
		0.0343	-2.12162e-11	-5.86565e-11	-1.28868e-09
		0.03432	-1.99682e-11	-5.86565e-11	-1.29119e-09
		0.03434	-1.93442e-11	-6.05286e-11	-1.29182e-09
		0.03436	-1.80962e-11	-5.99046e-11	-1.29558e-09
		0.03438	-1.74722e-11	-5.92806e-11	-1.29997e-09
		0.0344	-1.56001e-11	-5.86565e-11	-1.30435e-09
		0.03442	-1.49761e-11	-5.86565e-11	-1.30686e-09
		0.03444	-1.68482e-11	-5.80325e-11	-1.30749e-09
		0.03446	-1.80962e-11	-5.92806e-11	-1.30999e-09
		0.03448	-1.99682e-11	-5.99046e-11	-1.31062e-09
		0.0345	-2.12162e-11	-5.86565e-11	-1.31125e-09
		0.03452	-2.12162e-11	-5.92806e-11	-1.31438e-09
		0.03454	-2.05922e-11	-5.99046e-11	-1.31501e-09
		0.03456	-2.05922e-11	-5.92806e-11	-1.31877e-09
		0.03458	-1.93442e-11	-6.05286e-11	-1.32065e-09
		0.0346	-1.80962e-11	-6.11526e-11	-1.32441e-09
		0.03462	-1.87202e-11	-6.17766e-11	-1.32817e-09
		0.03464	-1.93442e-11	-6.55206e-11	-1.32817e-09
		0.03466	-2.05922e-11	-6.67686e-11	-1.32754e-09
		0.03468	-1.87202e-11	-6.55206e-11	-1.32817e-09
		0.0347	-1.80962e-11	-6.80166e-11	-1.32942e-09
		0.03472	-1.80962e-11	-6.48966e-11	-1.3288e-09
		0.03474	-1.74722e-11	-6.42726e-11	-1.33005e-09
		0.03476	-1.80962e-11	-6.36486e-11	-1.33005e-09
		0.03478	-1.87202e-11	-6.17766e-11	-1.33068e-09
		0.0348	-1.99682e-11	-5.99046e-11	-1.33319e-09
		0.03482	-2.12162e-11	-5.74085e-11	-1.3382e-09
		0.03484	-2.05922e-11	-5.67845e-11	-1.3382e-09
		0.03486	-1.87202e-11	-5.74085e-11	-1.34133e-09
		0.03488	-1.68482e-11	-5.80325e-11	-1.34196e-09
		0.0349	-1.74722e-11	-5.86565e-11	-1.34196e-09
		0.03492	-1.56001e-11	-6.05286e-11	-1.34008e-09
		0.03494	-1.62242e-11	-6.11526e-11	-1.33757e-09
		0.03496	-1.68482e-11	-6.42726e-11	-1.33569e-09
		0.03498	-1.68482e-11	-6.48966e-11	-1.33256e-09
		0.035	-1.68482e-11	-6.61446e-11	-1.33005e-09
		0.03502	-1.87202e-11	-6.48966e-11	-1.32754e-09
		0.03504	-1.80962e-11	-6.61446e-11	-1.32692e-09
		0.03506	-1.62242e-11	-6.24006e-11	-1.32566e-09
		0.03508	-1.56001e-11	-6.30246e-11	-1.32629e-09
		0.0351	-1.62242e-11	-6.30246e-11	-1.32754e-09
		0.03512	-1.62242e-11	-6.30246e-11	-1.3288e-09
		0.03514	-1.68482e-11	-6.30246e-11	-1.32942e-09
		0.03516	-1.74722e-11	-6.30246e-11	-1.33068e-09
		0.03518	-1.80962e-11	-6.42726e-11	-1.3313e-09
		0.0352	-1.99682e-11	-6.36486e-11	-1.33444e-09
		0.03522	-1.99682e-11	-6.24006e-11	-1.33507e-09
		0.03524	-1.99682e-11	-6.17766e-11	-1.33632e-09
		0.03526	-1.93442e-11	-6.05286e-11	-1.33381e-09
		0.03528	-2.12162e-11	-6.17766e-11	-1.33256e-09
		0.0353	-1.99682e-11	-6.05286e-11	-1.33068e-09
		0.03532	-1.87202e-11	-6.05286e-11	-1.3288e-09
		0.03534	-1.93442e-11	-5.92806e-11	-1.32817e-09
		0.03536	-1.80962e-11	-6.05286e-11	-1.3288e-09
		0.03538	-1.62242e-11	-5.99046e-11	-1.32754e-09
		0.0354	-1.49761e-11	-5.80325e-11	-1.32629e-09
		0.03542	-1.24801e-11	-5.80325e-11	-1.32441e-09
		0.03544	-1.37281e-11	-5.92806e-11	-1.3219e-09
		0.03546	-1.62242e-11	-6.17766e-11	-1.3219e-09
		0.03548	-1.80962e-11	-6.24006e-11	-1.31752e-09
		0.0355	-2.05922e-11	-6.42726e-11	-1.31438e-09
		0.03552	-2.24642e-11	-6.73926e-11	-1.31187e-09
		0.03554	-2.24642e-11	-7.05127e-11	-1.30937e-09
		0.03556	-2.30882e-11	-7.05127e-11	-1.30749e-09
		0.03558	-2.30882e-11	-7.17607e-11	-1.30373e-09
		0.0356	-2.37122e-11	-6.98887e-11	-1.30185e-09
		0.03562	-2.30882e-11	-6.98887e-11	-1.29808e-09
		0.03564	-2.37122e-11	-6.86406e-11	-1.2937e-09
		0.03566	-2.18402e-11	-6.61446e-11	-1.29056e-09
		0.03568	-2.12162e-11	-6.48966e-11	-1.28555e-09
		0.0357	-2.05922e-11	-6.30246e-11	-1.28304e-09
		0.03572	-1.87202e-11	-6.24006e-11	-1.27991e-09
		0.03574	-1.74722e-11	-6.17766e-11	-1.27865e-09
		0.03576	-1.74722e-11	-6.05286e-11	-1.27803e-09
		0.03578	-1.74722e-11	-6.05286e-11	-1.27552e-09
		0.0358	-1.99682e-11	-5.99046e-11	-1.27552e-09
		0.03582	-1.99682e-11	-6.05286e-11	-1.27489e-09
		0.03584	-1.99682e-11	-5.92806e-11	-1.27552e-09
		0.03586	-1.93442e-11	-5.80325e-11	-1.27677e-09
		0.03588	-1.87202e-11	-5.74085e-11	-1.2774e-09
		0.0359	-1.62242e-11	-5.67845e-11	-1.27615e-09
		0.03592	-1.56001e-11	-5.80325e-11	-1.27615e-09
		0.03594	-1.56001e-11	-5.92806e-11	-1.2774e-09
		0.03596	-1.80962e-11	-6.17766e-11	-1.27991e-09
		0.03598	-1.99682e-11	-6.17766e-11	-1.28179e-09
		0.036	-2.05922e-11	-6.17766e-11	-1.28618e-09
		0.03602	-1.87202e-11	-6.24006e-11	-1.28931e-09
		0.03604	-1.87202e-11	-6.24006e-11	-1.29307e-09
		0.03606	-1.80962e-11	-6.24006e-11	-1.29683e-09
		0.03608	-1.68482e-11	-6.05286e-11	-1.29871e-09
		0.0361	-1.62242e-11	-5.92806e-11	-1.29997e-09
		0.03612	-1.62242e-11	-5.86565e-11	-1.30122e-09
		0.03614	-1.74722e-11	-5.92806e-11	-1.30122e-09
		0.03616	-1.93442e-11	-5.86565e-11	-1.30122e-09
		0.03618	-1.93442e-11	-5.92806e-11	-1.29746e-09
		0.0362	-1.87202e-11	-5.86565e-11	-1.29307e-09
		0.03622	-2.05922e-11	-5.92806e-11	-1.28868e-09
		0.03624	-1.87202e-11	-5.80325e-11	-1.28743e-09
		0.03626	-1.87202e-11	-5.80325e-11	-1.28555e-09
		0.03628	-1.74722e-11	-5.92806e-11	-1.28618e-09
		0.0363	-1.87202e-11	-5.92806e-11	-1.28618e-09
		0.03632	-1.93442e-11	-6.05286e-11	-1.28806e-09
		0.03634	-1.87202e-11	-6.05286e-11	-1.28806e-09
		0.03636	-1.80962e-11	-6.11526e-11	-1.29056e-09
		0.03638	-1.62242e-11	-6.24006e-11	-1.29307e-09
		0.0364	-1.49761e-11	-6.24006e-11	-1.29432e-09
		0.03642	-1.43521e-11	-6.17766e-11	-1.29558e-09
		0.03644	-1.56001e-11	-6.11526e-11	-1.2962e-09
		0.03646	-1.56001e-11	-6.11526e-11	-1.29558e-09
		0.03648	-1.74722e-11	-6.30246e-11	-1.29558e-09
		0.0365	-1.87202e-11	-6.11526e-11	-1.29808e-09
		0.03652	-1.99682e-11	-6.24006e-11	-1.29997e-09
		0.03654	-2.05922e-11	-6.24006e-11	-1.30498e-09
		0.03656	-2.12162e-11	-6.24006e-11	-1.31187e-09
		0.03658	-2.18402e-11	-6.42726e-11	-1.31626e-09
		0.0366	-2.24642e-11	-6.36486e-11	-1.3194e-09
		0.03662	-2.37122e-11	-6.55206e-11	-1.32378e-09
		0.03664	-2.37122e-11	-6.42726e-11	-1.32566e-09
		0.03666	-2.18402e-11	-6.36486e-11	-1.32692e-09
		0.03668	-2.05922e-11	-6.24006e-11	-1.32692e-09
		0.0367	-1.87202e-11	-6.30246e-11	-1.32504e-09
		0.03672	-1.62242e-11	-5.99046e-11	-1.32441e-09
		0.03674	-1.68482e-11	-6.05286e-11	-1.3219e-09
		0.03676	-1.62242e-11	-5.92806e-11	-1.3194e-09
		0.03678	-1.68482e-11	-5.80325e-11	-1.31689e-09
		0.0368	-1.62242e-11	-5.80325e-11	-1.31438e-09
		0.03682	-1.68482e-11	-5.74085e-11	-1.31062e-09
		0.03684	-1.74722e-11	-5.86565e-11	-1.30373e-09
		0.03686	-1.87202e-11	-6.17766e-11	-1.29934e-09
		0.03688	-1.68482e-11	-6.17766e-11	-1.29432e-09
		0.0369	-1.49761e-11	-6.17766e-11	-1.28743e-09
		0.03692	-1.43521e-11	-6.11526e-11	-1.28555e-09
		0.03694	-1.56001e-11	-6.05286e-11	-1.28116e-09
		0.03696	-1.49761e-11	-5.99046e-11	-1.28053e-09
		0.03698	-1.68482e-11	-5.86565e-11	-1.28053e-09
		0.037	-1.56001e-11	-5.92806e-11	-1.27928e-09
		0.03702	-1.56001e-11	-6.05286e-11	-1.28053e-09
		0.03704	-1.68482e-11	-5.80325e-11	-1.28116e-09
		0.03706	-1.62242e-11	-5.86565e-11	-1.27865e-09
		0.03708	-1.74722e-11	-5.86565e-11	-1.28116e-09
		0.0371	-1.74722e-11	-5.74085e-11	-1.27928e-09
		0.03712	-2.05922e-11	-5.67845e-11	-1.28116e-09
		0.03714	-2.12162e-11	-5.61605e-11	-1.28304e-09
		0.03716	-2.12162e-11	-5.67845e-11	-1.28868e-09
		0.03718	-2.18402e-11	-5.74085e-11	-1.29182e-09
		0.0372	-2.18402e-11	-6.05286e-11	-1.29307e-09
		0.03722	-1.93442e-11	-6.05286e-11	-1.29495e-09
		0.03724	-1.87202e-11	-6.17766e-11	-1.2937e-09
		0.03726	-1.80962e-11	-5.99046e-11	-1.29182e-09
		0.03728	-1.80962e-11	-5.92806e-11	-1.28994e-09
		0.0373	-1.99682e-11	-5.86565e-11	-1.28931e-09
		0.03732	-2.05922e-11	-6.17766e-11	-1.28868e-09
		0.03734	-2.30882e-11	-5.99046e-11	-1.28868e-09
		0.03736	-2.24642e-11	-5.99046e-11	-1.28806e-09
		0.03738	-2.18402e-11	-5.92806e-11	-1.28868e-09
		0.0374	-1.93442e-11	-5.86565e-11	-1.28743e-09
		0.03742	-1.68482e-11	-5.74085e-11	-1.28492e-09
		0.03744	-1.68482e-11	-5.74085e-11	-1.28242e-09
		0.03746	-1.62242e-11	-5.74085e-11	-1.27991e-09
		0.03748	-1.62242e-11	-5.99046e-11	-1.27865e-09
		0.0375	-1.74722e-11	-6.05286e-11	-1.27552e-09
		0.03752	-1.62242e-11	-5.99046e-11	-1.27489e-09
		0.03754	-1.56001e-11	-6.05286e-11	-1.27615e-09
		0.03756	-1.68482e-11	-6.05286e-11	-1.27615e-09
		0.03758	-1.49761e-11	-6.11526e-11	-1.27991e-09
		0.0376	-1.49761e-11	-5.86565e-11	-1.28242e-09
		0.03762	-1.49761e-11	-5.80325e-11	-1.28618e-09
		0.03764	-1.56001e-11	-5.67845e-11	-1.28994e-09
		0.03766	-1.62242e-11	-5.61605e-11	-1.29182e-09
		0.03768	-1.56001e-11	-5.74085e-11	-1.29432e-09
		0.0377	-1.62242e-11	-5.74085e-11	-1.29495e-09
		0.03772	-1.43521e-11	-5.74085e-11	-1.2937e-09
		0.03774	-1.49761e-11	-5.92806e-11	-1.29307e-09
		0.03776	-1.56001e-11	-5.80325e-11	-1.29746e-09
		0.03778	-1.80962e-11	-5.80325e-11	-1.29808e-09
		0.0378	-1.87202e-11	-5.80325e-11	-1.29997e-09
		0.03782	-1.99682e-11	-5.74085e-11	-1.29871e-09
		0.03784	-1.87202e-11	-5.74085e-11	-1.2962e-09
		0.03786	-1.74722e-11	-5.74085e-11	-1.29244e-09
		0.03788	-1.62242e-11	-5.74085e-11	-1.28743e-09
		0.0379	-1.37281e-11	-5.67845e-11	-1.28555e-09
		0.03792	-1.31041e-11	-5.67845e-11	-1.2843e-09
		0.03794	-1.37281e-11	-5.42885e-11	-1.2843e-09
		0.03796	-1.18561e-11	-5.49125e-11	-1.2868e-09
		0.03798	-1.49761e-11	-5.36645e-11	-1.28868e-09
		0.038	-1.56001e-11	-5.42885e-11	-1.29182e-09
		0.03802	-1.74722e-11	-5.49125e-11	-1.29495e-09
		0.03804	-1.56001e-11	-5.30405e-11	-1.29495e-09
		0.03806	-1.62242e-11	-5.24165e-11	-1.29683e-09
		0.03808	-1.56001e-11	-5.30405e-11	-1.29558e-09
		0.0381	-1.62242e-11	-5.24165e-11	-1.2962e-09
		0.03812	-1.99682e-11	-5.30405e-11	-1.29558e-09
		0.03814	-1.93442e-11	-5.49125e-11	-1.29683e-09
		0.03816	-1.93442e-11	-5.67845e-11	-1.29871e-09
		0.03818	-1.87202e-11	-5.80325e-11	-1.29934e-09
		0.0382	-1.80962e-11	-6.05286e-11	-1.30185e-09
		0.03822	-1.93442e-11	-6.11526e-11	-1.30185e-09
		0.03824	-1.93442e-11	-6.36486e-11	-1.30122e-09
		0.03826	-2.05922e-11	-6.42726e-11	-1.30435e-09
		0.03828	-2.05922e-11	-6.17766e-11	-1.30435e-09
		0.0383	-2.18402e-11	-6.17766e-11	-1.3031e-09
		0.03832	-2.24642e-11	-6.36486e-11	-1.30435e-09
		0.03834	-2.05922e-11	-6.17766e-11	-1.30185e-09
		0.03836	-1.99682e-11	-6.30246e-11	-1.30247e-09
		0.03838	-1.87202e-11	-6.24006e-11	-1.30059e-09
		0.0384	-1.74722e-11	-6.05286e-11	-1.29871e-09
		0.03842	-1.87202e-11	-5.86565e-11	-1.29871e-09
		0.03844	-1.87202e-11	-5.74085e-11	-1.29808e-09
		0.03846	-2.18402e-11	-5.80325e-11	-1.29997e-09
		0.03848	-2.18402e-11	-5.80325e-11	-1.30122e-09
		0.0385	-2.12162e-11	-5.74085e-11	-1.3031e-09
		0.03852	-2.43362e-11	-5.92806e-11	-1.30623e-09
		0.03854	-2.12162e-11	-5.99046e-11	-1.30937e-09
		0.03856	-2.05922e-11	-6.05286e-11	-1.3125e-09
		0.03858	-1.87202e-11	-5.92806e-11	-1.31187e-09
		0.0386	-1.93442e-11	-6.05286e-11	-1.30999e-09
		0.03862	-1.93442e-11	-5.92806e-11	-1.30561e-09
		0.03864	-1.99682e-11	-6.17766e-11	-1.3031e-09
		0.03866	-2.12162e-11	-6.36486e-11	-1.30122e-09
		0.03868	-1.99682e-11	-6.55206e-11	-1.29934e-09
		0.0387	-1.80962e-11	-6.55206e-11	-1.30122e-09
		0.03872	-1.74722e-11	-6.61446e-11	-1.30185e-09
		0.03874	-1.74722e-11	-6.36486e-11	-1.30435e-09
		0.03876	-1.43521e-11	-6.30246e-11	-1.3031e-09
		0.03878	-1.43521e-11	-6.05286e-11	-1.30373e-09
		0.0388	-1.62242e-11	-5.92806e-11	-1.30373e-09
		0.03882	-1.62242e-11	-5.61605e-11	-1.3031e-09
		0.03884	-1.74722e-11	-5.67845e-11	-1.30185e-09
		0.03886	-1.80962e-11	-5.61605e-11	-1.30122e-09
		0.03888	-1.80962e-11	-5.67845e-11	-1.30059e-09
		0.0389	-1.68482e-11	-5.86565e-11	-1.29871e-09
		0.03892	-1.74722e-11	-5.99046e-11	-1.29495e-09
		0.03894	-1.62242e-11	-5.92806e-11	-1.29182e-09
		0.03896	-1.68482e-11	-5.86565e-11	-1.28994e-09
		0.03898	-1.74722e-11	-5.92806e-11	-1.28743e-09
		0.039	-1.80962e-11	-5.99046e-11	-1.28555e-09
		0.03902	-1.93442e-11	-5.99046e-11	-1.28555e-09
		0.03904	-1.74722e-11	-6.11526e-11	-1.28618e-09
		0.03906	-1.80962e-11	-6.11526e-11	-1.28868e-09
		0.03908	-1.93442e-11	-5.92806e-11	-1.28994e-09
		0.0391	-1.74722e-11	-5.86565e-11	-1.29056e-09
		0.03912	-1.93442e-11	-5.86565e-11	-1.29182e-09
		0.03914	-2.12162e-11	-5.74085e-11	-1.29119e-09
		0.03916	-2.24642e-11	-5.67845e-11	-1.28868e-09
		0.03918	-2.37122e-11	-5.67845e-11	-1.28931e-09
		0.0392	-2.37122e-11	-5.74085e-11	-1.28931e-09
		0.03922	-2.30882e-11	-5.92806e-11	-1.2937e-09
		0.03924	-2.12162e-11	-5.99046e-11	-1.29558e-09
		0.03926	-2.12162e-11	-6.05286e-11	-1.29871e-09
		0.03928	-2.05922e-11	-5.92806e-11	-1.29871e-09
		0.0393	-2.24642e-11	-5.99046e-11	-1.30122e-09
		0.03932	-2.24642e-11	-5.86565e-11	-1.30059e-09
		0.03934	-2.30882e-11	-5.99046e-11	-1.30059e-09
		0.03936	-2.18402e-11	-6.11526e-11	-1.29997e-09
		0.03938	-1.93442e-11	-5.92806e-11	-1.29871e-09
		0.0394	-1.68482e-11	-6.05286e-11	-1.29808e-09
		0.03942	-1.62242e-11	-5.92806e-11	-1.29558e-09
		0.03944	-1.62242e-11	-5.92806e-11	-1.2937e-09
		0.03946	-1.74722e-11	-5.74085e-11	-1.29307e-09
		0.03948	-1.74722e-11	-5.67845e-11	-1.29244e-09
		0.0395	-1.87202e-11	-5.61605e-11	-1.29182e-09
		0.03952	-1.74722e-11	-5.55365e-11	-1.28994e-09
		0.03954	-1.74722e-11	-5.67845e-11	-1.28806e-09
		0.03956	-1.68482e-11	-5.80325e-11	-1.28618e-09
		0.03958	-1.49761e-11	-5.74085e-11	-1.2868e-09
		0.0396	-1.49761e-11	-5.86565e-11	-1.28994e-09
		0.03962	-1.43521e-11	-5.86565e-11	-1.29244e-09
		0.03964	-1.49761e-11	-5.80325e-11	-1.29683e-09
		0.03966	-1.62242e-11	-5.86565e-11	-1.29871e-09
		0.03968	-1.62242e-11	-5.99046e-11	-1.30059e-09
		0.0397	-1.74722e-11	-5.92806e-11	-1.3031e-09
		0.03972	-1.49761e-11	-5.86565e-11	-1.30122e-09
		0.03974	-1.49761e-11	-5.86565e-11	-1.30059e-09
		0.03976	-1.49761e-11	-5.80325e-11	-1.29997e-09
		0.03978	-1.43521e-11	-5.80325e-11	-1.29746e-09
		0.0398	-1.24801e-11	-5.80325e-11	-1.2962e-09
		0.03982	-1.37281e-11	-5.80325e-11	-1.29558e-09
		0.03984	-1.37281e-11	-5.92806e-11	-1.2937e-09
		0.03986	-1.43521e-11	-5.99046e-11	-1.29307e-09
		0.03988	-1.43521e-11	-6.05286e-11	-1.28994e-09
		0.0399	-1.49761e-11	-5.99046e-11	-1.28743e-09
		0.03992	-1.62242e-11	-6.05286e-11	-1.28618e-09
[truncated: 23,013 more rows]

## Sheet: 100 Hz, RT, 2 Ca2+_Panel B
		Panel B1_sample EPSC traces					Panel B1_normalized EPSC amplitude vs stimulation (#)								Panel B1_average depression at EPSCs (#26-30)					Panel B2_normalized recovery from STD vs time interval (s)
		Time (s)	Control	Dynasore	Pitstop-2		Stimulation (#)	Control		Dynasore		Pitstop-2				Control	Dynasore	Pitstop-2		Time interval (s)	Control		Dynasore		Pitstop-2
								Mean	SEM	Mean	SEM	Mean	SEM		Mean	0.188	0.115	0.104			Mean	SEM	Mean	SEM	Mean	SEM
		0	-6.19326e-10	-2.51474e-10	-6.08406e-11		1	1	0	1	0	1	0		SEM	0.017	0.019	0.015		0.02	0.01	0.02	0.04	0.01	0.04	0.01
		2e-05	-6.19638e-10	-2.53658e-10	-6.08406e-11		2	0.804102	0.034875	0.635826	0.0505699	0.609368	0.0315146		n number	11	6	5		0.1	0.18	0.03	0.27	0.04	0.25	0.03
		4e-05	-6.20262e-10	-2.53658e-10	-6.11526e-11		3	0.642786	0.0488098	0.46621	0.0603359	0.433253	0.0330859		p-value	--	0.016	0.008		0.3	0.3	0.05	0.44	0.06	0.44	0.08
		6e-05	-6.1995e-10	-2.53346e-10	-6.08406e-11		4	0.534051	0.0451361	0.362252	0.0468084	0.311229	0.0348764							1	0.48	0.03	0.57	0.05	0.6	0.05
		8e-05	-6.19014e-10	-2.53346e-10	-6.30246e-11		5	0.454589	0.0437814	0.284232	0.0283706	0.288812	0.0491187							3	0.67	0.05	0.76	0.04	0.73	0.07
		0.0001	-6.18078e-10	-2.5241e-10	-6.24006e-11		6	0.400669	0.0456338	0.239522	0.0419545	0.224039	0.0298506							8	0.9	0.03	0.9	0.04	0.89	0.03
		0.00012	-6.17766e-10	-2.52098e-10	-6.24006e-11		7	0.362267	0.034764	0.211905	0.034701	0.225334	0.0336867							12	0.95	0.02	0.95	0.01	0.96	0.01
		0.00014	-6.1683e-10	-2.53346e-10	-6.30246e-11		8	0.307523	0.0226365	0.189638	0.026709	0.187333	0.014768							20	0.97	0.02	0.99	0.03	0.97	0.02
		0.00016	-6.17454e-10	-2.54906e-10	-6.30246e-11		9	0.297459	0.0281058	0.150452	0.0249738	0.177548	0.0242645
		0.00018	-6.18702e-10	-2.54906e-10	-6.30246e-11		10	0.282816	0.0282108	0.162948	0.024148	0.165433	0.00711847
		0.0002	-6.18078e-10	-2.55218e-10	-6.27126e-11		11	0.239589	0.0239548	0.150957	0.0238643	0.158647	0.0219533
		0.00022	-6.17766e-10	-2.55842e-10	-6.24006e-11		12	0.225855	0.018219	0.141278	0.0246988	0.142514	0.0132786
		0.00024	-6.17454e-10	-2.55842e-10	-6.30246e-11		13	0.247037	0.0258735	0.122591	0.0139855	0.116914	0.0186948
		0.00026	-6.16518e-10	-2.56778e-10	-6.24006e-11		14	0.213668	0.0207906	0.105945	0.0156905	0.115178	0.0115689
		0.00028	-6.1527e-10	-2.57402e-10	-6.17766e-11		15	0.199094	0.0227001	0.10785	0.0156175	0.130678	0.0109277
		0.0003	-6.15894e-10	-2.58338e-10	-6.08406e-11		16	0.188202	0.0247869	0.105577	0.0167899	0.10144	0.00890972
		0.00032	-6.15894e-10	-2.58338e-10	-5.99046e-11		17	0.194945	0.0247404	0.120258	0.0198303	0.104871	0.00410804
		0.00034	-6.17454e-10	-2.5865e-10	-5.95926e-11		18	0.180324	0.0172882	0.110278	0.00795604	0.124867	0.00204138
		0.00036	-6.1839e-10	-2.5865e-10	-5.95926e-11		19	0.185623	0.015342	0.115158	0.0234963	0.126862	0.0234824
		0.00038	-6.19014e-10	-2.59274e-10	-6.02166e-11		20	0.179419	0.0227797	0.116112	0.0124761	0.111202	0.00483631
		0.0004	-6.19014e-10	-2.58338e-10	-6.14646e-11		21	0.177457	0.0181181	0.110777	0.0157576	0.109885	0.0193763
		0.00042	-6.1839e-10	-2.57402e-10	-6.20886e-11		22	0.177848	0.0159436	0.119853	0.0185081	0.10439	0.0165591
		0.00044	-6.18702e-10	-2.55218e-10	-6.17766e-11		23	0.173703	0.0170168	0.113004	0.0107118	0.107433	0.0158107
		0.00046	-6.18078e-10	-2.54594e-10	-6.17766e-11		24	0.182804	0.0212894	0.106935	0.0214425	0.114279	0.00541131
		0.00048	-6.1839e-10	-2.53034e-10	-6.14646e-11		25	0.176635	0.0147804	0.118467	0.0169922	0.0986671	0.020866
		0.0005	-6.1995e-10	-2.5085e-10	-6.20886e-11		26	0.181718	0.0163001	0.102231	0.0152443	0.116482	0.00959166
		0.00052	-6.21198e-10	-2.50226e-10	-6.17766e-11		27	0.188358	0.0214978	0.124808	0.0219127	0.111674	0.0206794
		0.00054	-6.22134e-10	-2.50226e-10	-6.33366e-11		28	0.193716	0.0157129	0.106951	0.0204098	0.129158	0.0151399
		0.00056	-6.22134e-10	-2.50538e-10	-6.45846e-11		29	0.184906	0.0193805	0.113502	0.0214207	0.128983	0.0158838
		0.00058	-6.21198e-10	-2.5085e-10	-6.48966e-11		30	0.192797	0.0187161	0.12946	0.0211632	0.139617	0.0340253
		0.0006	-6.19638e-10	-2.49602e-10	-6.42726e-11
		0.00062	-6.17766e-10	-2.48666e-10	-6.39606e-11
		0.00064	-6.17454e-10	-2.4929e-10	-6.27126e-11
		0.00066	-6.17142e-10	-2.50226e-10	-6.24006e-11
		0.00068	-6.1683e-10	-2.51474e-10	-6.24006e-11
		0.0007	-6.16518e-10	-2.51786e-10	-6.14646e-11
		0.00072	-6.17454e-10	-2.52722e-10	-6.08406e-11
		0.00074	-6.1839e-10	-2.53346e-10	-6.02166e-11
		0.00076	-6.18702e-10	-2.53346e-10	-5.83445e-11
		0.00078	-6.18078e-10	-2.5397e-10	-5.74085e-11
		0.0008	-6.17766e-10	-2.54594e-10	-5.70965e-11
		0.00082	-6.17454e-10	-2.56466e-10	-5.61605e-11
		0.00084	-6.17454e-10	-2.5553e-10	-5.70965e-11
		0.00086	-6.1839e-10	-2.54282e-10	-5.86565e-11
		0.00088	-6.1995e-10	-2.53034e-10	-6.08406e-11
		0.0009	-6.1995e-10	-2.52098e-10	-6.33366e-11
		0.00092	-6.20262e-10	-2.50538e-10	-6.55206e-11
		0.00094	-6.19326e-10	-2.49602e-10	-6.55206e-11
		0.00096	-6.18078e-10	-2.50226e-10	-6.48966e-11
		0.00098	-6.1839e-10	-2.52098e-10	-6.48966e-11
		0.001	-6.18078e-10	-2.54282e-10	-6.45846e-11
		0.00102	-6.1839e-10	-2.55842e-10	-6.39606e-11
		0.00104	-6.18702e-10	-2.59274e-10	-6.36486e-11
		0.00106	-6.19326e-10	-2.60522e-10	-6.39606e-11
		0.00108	-6.1995e-10	-2.59898e-10	-6.33366e-11
		0.0011	-6.20574e-10	-2.59586e-10	-6.17766e-11
		0.00112	-6.20262e-10	-2.58338e-10	-6.14646e-11
		0.00114	-6.2151e-10	-2.5865e-10	-6.14646e-11
		0.00116	-6.21822e-10	-2.59586e-10	-6.20886e-11
		0.00118	-6.22758e-10	-2.59274e-10	-6.20886e-11
		0.0012	-6.21822e-10	-2.58338e-10	-6.33366e-11
		0.00122	-6.22134e-10	-2.56466e-10	-6.55206e-11
		0.00124	-6.20886e-10	-2.54282e-10	-6.67686e-11
		0.00126	-6.20262e-10	-2.53346e-10	-6.70806e-11
		0.00128	-6.19326e-10	-2.54282e-10	-6.55206e-11
		0.0013	-6.19014e-10	-2.56466e-10	-6.36486e-11
		0.00132	-6.19326e-10	-2.58338e-10	-6.17766e-11
		0.00134	-6.1995e-10	-2.59586e-10	-6.02166e-11
		0.00136	-6.21198e-10	-2.60522e-10	-5.92806e-11
		0.00138	-6.21822e-10	-2.59898e-10	-5.86565e-11
		0.0014	-6.2151e-10	-2.58962e-10	-5.95926e-11
		0.00142	-6.2151e-10	-2.57714e-10	-6.02166e-11
		0.00144	-6.20886e-10	-2.56466e-10	-6.02166e-11
		0.00146	-6.20886e-10	-2.5553e-10	-5.95926e-11
		0.00148	-6.1995e-10	-2.5397e-10	-5.92806e-11
		0.0015	-6.19326e-10	-2.53658e-10	-5.80325e-11
		0.00152	-6.19014e-10	-2.53346e-10	-5.77205e-11
		0.00154	-6.19014e-10	-2.51786e-10	-5.77205e-11
		0.00156	-6.19014e-10	-2.50226e-10	-5.95926e-11
		0.00158	-6.18702e-10	-2.49914e-10	-5.92806e-11
		0.0016	-6.19326e-10	-2.49602e-10	-5.99046e-11
		0.00162	-6.1839e-10	-2.51474e-10	-6.05286e-11
		0.00164	-6.19326e-10	-2.5397e-10	-6.05286e-11
		0.00166	-6.19638e-10	-2.5553e-10	-5.92806e-11
		0.00168	-6.19638e-10	-2.57714e-10	-5.86565e-11
		0.0017	-6.18702e-10	-2.56778e-10	-5.86565e-11
		0.00172	-6.17766e-10	-2.55218e-10	-6.05286e-11
		0.00174	-6.17766e-10	-2.53658e-10	-6.20886e-11
		0.00176	-6.17766e-10	-2.51474e-10	-6.27126e-11
		0.00178	-6.17766e-10	-2.51786e-10	-6.30246e-11
		0.0018	-6.19326e-10	-2.52098e-10	-6.17766e-11
		0.00182	-6.20262e-10	-2.53346e-10	-6.11526e-11
		0.00184	-6.20886e-10	-2.52722e-10	-6.08406e-11
		0.00186	-6.22758e-10	-2.51786e-10	-6.20886e-11
		0.00188	-6.21822e-10	-2.51162e-10	-6.36486e-11
		0.0019	-6.2151e-10	-2.50226e-10	-6.58326e-11
		0.00192	-6.20262e-10	-2.49602e-10	-6.73926e-11
		0.00194	-6.1839e-10	-2.48354e-10	-6.70806e-11
		0.00196	-6.1839e-10	-2.49602e-10	-6.64566e-11
		0.00198	-6.1839e-10	-2.5085e-10	-6.52086e-11
		0.002	-6.18702e-10	-2.5241e-10	-6.30246e-11
		0.00202	-6.18702e-10	-2.52722e-10	-6.27126e-11
		0.00204	-6.19326e-10	-2.53658e-10	-6.30246e-11
		0.00206	-6.17454e-10	-2.5397e-10	-6.39606e-11
		0.00208	-6.15894e-10	-2.5397e-10	-6.42726e-11
		0.0021	-6.15582e-10	-2.52722e-10	-6.45846e-11
		0.00212	-6.1527e-10	-2.52722e-10	-6.42726e-11
		0.00214	-6.16518e-10	-2.52098e-10	-6.17766e-11
		0.00216	-6.1839e-10	-2.51786e-10	-5.99046e-11
		0.00218	-6.20262e-10	-2.51786e-10	-5.86565e-11
		0.0022	-6.21822e-10	-2.51786e-10	-5.99046e-11
		0.00222	-6.22446e-10	-2.52098e-10	-6.05286e-11
		0.00224	-6.2151e-10	-2.54594e-10	-6.24006e-11
		0.00226	-6.20886e-10	-2.56466e-10	-6.39606e-11
		0.00228	-6.1995e-10	-2.57714e-10	-6.42726e-11
		0.0023	-6.19326e-10	-2.59898e-10	-6.42726e-11
		0.00232	-6.19326e-10	-2.61458e-10	-6.39606e-11
		0.00234	-6.19014e-10	-2.62082e-10	-6.20886e-11
		0.00236	-6.19014e-10	-2.60522e-10	-6.17766e-11
		0.00238	-6.18078e-10	-2.59586e-10	-6.24006e-11
		0.0024	-6.18078e-10	-2.57714e-10	-6.39606e-11
		0.00242	-6.18078e-10	-2.54906e-10	-6.39606e-11
		0.00244	-6.18078e-10	-2.53034e-10	-6.30246e-11
		0.00246	-6.18078e-10	-2.5397e-10	-6.33366e-11
		0.00248	-6.1839e-10	-2.53658e-10	-6.24006e-11
		0.0025	-6.18702e-10	-2.53658e-10	-6.24006e-11
		0.00252	-6.20262e-10	-2.53034e-10	-6.17766e-11
		0.00254	-6.19326e-10	-2.53034e-10	-6.11526e-11
		0.00256	-6.19326e-10	-2.51786e-10	-6.27126e-11
		0.00258	-6.18702e-10	-2.51474e-10	-6.24006e-11
		0.0026	-6.1839e-10	-2.51786e-10	-6.30246e-11
		0.00262	-6.17766e-10	-2.52098e-10	-6.17766e-11
		0.00264	-6.19014e-10	-2.53346e-10	-6.08406e-11
		0.00266	-6.19326e-10	-2.54282e-10	-5.92806e-11
		0.00268	-6.20574e-10	-2.54906e-10	-6.05286e-11
		0.0027	-6.1995e-10	-2.54906e-10	-6.17766e-11
		0.00272	-6.19326e-10	-2.54906e-10	-6.39606e-11
		0.00274	-6.18702e-10	-2.55218e-10	-6.58326e-11
		0.00276	-6.18702e-10	-2.5553e-10	-6.70806e-11
		0.00278	-6.19014e-10	-2.56154e-10	-6.67686e-11
		0.0028	-6.19014e-10	-2.56778e-10	-6.55206e-11
		0.00282	-6.19014e-10	-2.56466e-10	-6.42726e-11
		0.00284	-6.1839e-10	-2.56154e-10	-6.33366e-11
		0.00286	-6.18078e-10	-2.56778e-10	-6.27126e-11
		0.00288	-6.17142e-10	-2.55842e-10	-6.27126e-11
		0.0029	-6.17142e-10	-2.55218e-10	-6.36486e-11
		0.00292	-6.17766e-10	-2.54282e-10	-6.42726e-11
		0.00294	-6.18078e-10	-2.5397e-10	-6.52086e-11
		0.00296	-6.18702e-10	-2.5397e-10	-6.58326e-11
		0.00298	-6.19014e-10	-2.5397e-10	-6.52086e-11
		0.003	-6.19326e-10	-2.54282e-10	-6.39606e-11
		0.00302	-6.19326e-10	-2.53346e-10	-6.36486e-11
		0.00304	-6.18702e-10	-2.53034e-10	-6.36486e-11
		0.00306	-6.18078e-10	-2.53346e-10	-6.45846e-11
		0.00308	-6.18702e-10	-2.54282e-10	-6.52086e-11
		0.0031	-6.20886e-10	-2.5709e-10	-6.55206e-11
		0.00312	-6.2307e-10	-2.59898e-10	-6.52086e-11
		0.00314	-6.25254e-10	-2.62706e-10	-6.36486e-11
		0.00316	-6.2619e-10	-2.63642e-10	-6.30246e-11
		0.00318	-6.25878e-10	-2.61458e-10	-6.20886e-11
		0.0032	-6.24942e-10	-2.59898e-10	-6.24006e-11
		0.00322	-6.24318e-10	-2.59898e-10	-6.30246e-11
		0.00324	-6.2463e-10	-2.60834e-10	-6.33366e-11
		0.00326	-6.26502e-10	-2.63954e-10	-6.36486e-11
		0.00328	-6.28686e-10	-2.68947e-10	-6.39606e-11
		0.0033	-6.31494e-10	-2.76747e-10	-6.52086e-11
		0.00332	-6.34926e-10	-2.85795e-10	-6.70806e-11
		0.00334	-6.38358e-10	-2.95779e-10	-7.14487e-11
		0.00336	-6.42414e-10	-3.04203e-10	-7.61287e-11
		0.00338	-6.45222e-10	-3.12003e-10	-8.14328e-11
		0.0034	-6.48966e-10	-3.18243e-10	-8.67368e-11
		0.00342	-6.51462e-10	-3.22611e-10	-9.20409e-11
		0.00344	-6.54894e-10	-3.24795e-10	-9.73449e-11
		0.00346	-6.57078e-10	-3.26979e-10	-1.00153e-10
		0.00348	-6.5895e-10	-3.27291e-10	-1.02961e-10
		0.0035	-6.6051e-10	-3.27603e-10	-1.05145e-10
		0.00352	-6.61758e-10	-3.26979e-10	-1.07017e-10
		0.00354	-6.62694e-10	-3.26667e-10	-1.09513e-10
		0.00356	-6.63942e-10	-3.25731e-10	-1.12009e-10
		0.00358	-6.64878e-10	-3.24171e-10	-1.13569e-10
		0.0036	-6.6519e-10	-3.23235e-10	-1.17001e-10
		0.00362	-6.67686e-10	-3.23859e-10	-1.17625e-10
		0.00364	-6.68622e-10	-3.23859e-10	-1.16377e-10
		0.00366	-6.68934e-10	-3.24795e-10	-1.16377e-10
		0.00368	-6.6831e-10	-3.24795e-10	-1.16689e-10
		0.0037	-6.67062e-10	-3.23859e-10	-1.17313e-10
		0.00372	-6.65814e-10	-3.23859e-10	-1.18873e-10
		0.00374	-6.65502e-10	-3.23547e-10	-1.20745e-10
		0.00376	-6.6519e-10	-3.22923e-10	-1.22305e-10
		0.00378	-6.66438e-10	-3.22611e-10	-1.23553e-10
		0.0038	-6.6675e-10	-3.22611e-10	-1.23553e-10
		0.00382	-6.67374e-10	-3.21675e-10	-1.24801e-10
		0.00384	-6.67374e-10	-3.20115e-10	-1.25113e-10
		0.00386	-6.66126e-10	-3.20427e-10	-1.25113e-10
		0.00388	-6.64878e-10	-3.19491e-10	-1.25737e-10
		0.0039	-6.64254e-10	-3.18867e-10	-1.26049e-10
		0.00392	-6.63942e-10	-3.18243e-10	-1.25425e-10
		0.00394	-6.6363e-10	-3.18243e-10	-1.24801e-10
		0.00396	-6.6363e-10	-3.17931e-10	-1.23865e-10
		0.00398	-6.64254e-10	-3.17931e-10	-1.22305e-10
		0.004	-6.65502e-10	-3.18243e-10	-1.22305e-10
		0.00402	-6.66126e-10	-3.16371e-10	-1.22929e-10
		0.00404	-6.66438e-10	-3.14187e-10	-1.22929e-10
		0.00406	-6.66126e-10	-3.10131e-10	-1.23553e-10
		0.00408	-6.66438e-10	-3.06387e-10	-1.24489e-10
		0.0041	-6.65814e-10	-3.03267e-10	-1.22929e-10
		0.00412	-6.6519e-10	-3.00771e-10	-1.21057e-10
		0.00414	-6.66126e-10	-3.00459e-10	-1.17313e-10
		0.00416	-6.6675e-10	-3.02331e-10	-1.14193e-10
		0.00418	-6.6675e-10	-3.04827e-10	-1.12321e-10
		0.0042	-6.6675e-10	-3.06699e-10	-1.12009e-10
		0.00422	-6.65814e-10	-3.07635e-10	-1.12945e-10
		0.00424	-6.6519e-10	-3.07635e-10	-1.14505e-10
		0.00426	-6.63942e-10	-3.06699e-10	-1.15753e-10
		0.00428	-6.62694e-10	-3.05139e-10	-1.16377e-10
		0.0043	-6.62694e-10	-3.04203e-10	-1.17001e-10
		0.00432	-6.62382e-10	-3.04203e-10	-1.15441e-10
		0.00434	-6.63006e-10	-3.03579e-10	-1.14505e-10
		0.00436	-6.63318e-10	-3.01707e-10	-1.15441e-10
		0.00438	-6.63318e-10	-3.00147e-10	-1.15441e-10
		0.0044	-6.63318e-10	-2.98275e-10	-1.15753e-10
		0.00442	-6.63006e-10	-2.96715e-10	-1.16689e-10
		0.00444	-6.61446e-10	-2.95779e-10	-1.16377e-10
		0.00446	-6.60198e-10	-2.95155e-10	-1.14817e-10
		0.00448	-6.60822e-10	-2.96091e-10	-1.13881e-10
		0.0045	-6.61134e-10	-2.97027e-10	-1.11697e-10
		0.00452	-6.61446e-10	-2.98587e-10	-1.10449e-10
		0.00454	-6.62694e-10	-2.99523e-10	-1.09513e-10
		0.00456	-6.61758e-10	-3.00147e-10	-1.10449e-10
		0.00458	-6.6051e-10	-3.00147e-10	-1.10761e-10
		0.0046	-6.59574e-10	-2.99835e-10	-1.11385e-10
		0.00462	-6.58326e-10	-3.00147e-10	-1.11385e-10
		0.00464	-6.58638e-10	-2.99523e-10	-1.10137e-10
		0.00466	-6.59262e-10	-2.99523e-10	-1.09201e-10
		0.00468	-6.59886e-10	-2.96715e-10	-1.08889e-10
		0.0047	-6.6051e-10	-2.95779e-10	-1.09201e-10
		0.00472	-6.61134e-10	-2.93595e-10	-1.09513e-10
		0.00474	-6.61758e-10	-2.92035e-10	-1.09825e-10
		0.00476	-6.62694e-10	-2.91723e-10	-1.10137e-10
		0.00478	-6.63006e-10	-2.91411e-10	-1.08265e-10
		0.0048	-6.63318e-10	-2.92035e-10	-1.06081e-10
		0.00482	-6.63318e-10	-2.92035e-10	-1.06081e-10
		0.00484	-6.62694e-10	-2.92971e-10	-1.04521e-10
		0.00486	-6.62382e-10	-2.93907e-10	-1.04209e-10
		0.00488	-6.62382e-10	-2.93907e-10	-1.03585e-10
		0.0049	-6.60822e-10	-2.93907e-10	-1.04209e-10
		0.00492	-6.59886e-10	-2.94531e-10	-1.05769e-10
		0.00494	-6.59262e-10	-2.93595e-10	-1.06393e-10
		0.00496	-6.58638e-10	-2.92347e-10	-1.06705e-10
		0.00498	-6.57078e-10	-2.90475e-10	-1.05457e-10
		0.005	-6.57702e-10	-2.89227e-10	-1.05769e-10
		0.00502	-6.59262e-10	-2.87667e-10	-1.05145e-10
		0.00504	-6.60198e-10	-2.87355e-10	-1.04833e-10
		0.00506	-6.61758e-10	-2.88291e-10	-1.04521e-10
		0.00508	-6.63318e-10	-2.88291e-10	-1.06081e-10
		0.0051	-6.63318e-10	-2.88291e-10	-1.06393e-10
		0.00512	-6.63318e-10	-2.88915e-10	-1.05457e-10
		0.00514	-6.62382e-10	-2.89539e-10	-1.04833e-10
		0.00516	-6.61758e-10	-2.90163e-10	-1.04209e-10
		0.00518	-6.63006e-10	-2.91099e-10	-1.03897e-10
		0.0052	-6.62382e-10	-2.91411e-10	-1.03585e-10
		0.00522	-6.61446e-10	-2.90787e-10	-1.04209e-10
		0.00524	-6.61446e-10	-2.91411e-10	-1.04833e-10
		0.00526	-6.61134e-10	-2.91723e-10	-1.05145e-10
		0.00528	-6.59574e-10	-2.91723e-10	-1.05457e-10
		0.0053	-6.59574e-10	-2.92347e-10	-1.05145e-10
		0.00532	-6.60198e-10	-2.92971e-10	-1.05457e-10
		0.00534	-6.61134e-10	-2.93595e-10	-1.03585e-10
		0.00536	-6.61446e-10	-2.92971e-10	-1.01713e-10
		0.00538	-6.60822e-10	-2.92035e-10	-1.00777e-10
		0.0054	-6.61134e-10	-2.89539e-10	-1.00153e-10
		0.00542	-6.60198e-10	-2.87043e-10	-1.00777e-10
		0.00544	-6.60198e-10	-2.85171e-10	-1.00777e-10
		0.00546	-6.59574e-10	-2.82987e-10	-1.00465e-10
		0.00548	-6.60198e-10	-2.82987e-10	-1.00153e-10
		0.0055	-6.60198e-10	-2.83923e-10	-1.00777e-10
		0.00552	-6.61134e-10	-2.85171e-10	-1.01401e-10
		0.00554	-6.60822e-10	-2.86731e-10	-1.02025e-10
		0.00556	-6.61134e-10	-2.85483e-10	-1.03273e-10
		0.00558	-6.60198e-10	-2.85171e-10	-1.03897e-10
		0.0056	-6.60198e-10	-2.83299e-10	-1.05457e-10
		0.00562	-6.60822e-10	-2.82363e-10	-1.04521e-10
		0.00564	-6.6051e-10	-2.83299e-10	-1.04209e-10
		0.00566	-6.61134e-10	-2.83611e-10	-1.02649e-10
		0.00568	-6.61446e-10	-2.84235e-10	-1.00465e-10
		0.0057	-6.60822e-10	-2.84235e-10	-9.85929e-11
		0.00572	-6.59886e-10	-2.82675e-10	-9.79689e-11
		0.00574	-6.58638e-10	-2.82363e-10	-9.85929e-11
		0.00576	-6.58326e-10	-2.82675e-10	-9.98409e-11
		0.00578	-6.58014e-10	-2.84235e-10	-1.00465e-10
		0.0058	-6.58326e-10	-2.85483e-10	-1.01089e-10
		0.00582	-6.59262e-10	-2.85795e-10	-1.00153e-10
		0.00584	-6.60198e-10	-2.87667e-10	-9.92169e-11
		0.00586	-6.60198e-10	-2.87979e-10	-9.79689e-11
		0.00588	-6.61446e-10	-2.88291e-10	-9.64089e-11
		0.0059	-6.6207e-10	-2.88291e-10	-9.64089e-11
		0.00592	-6.61446e-10	-2.87355e-10	-9.60969e-11
		0.00594	-6.60822e-10	-2.86731e-10	-9.73449e-11
		0.00596	-6.61446e-10	-2.85795e-10	-9.73449e-11
		0.00598	-6.59886e-10	-2.85171e-10	-9.85929e-11
		0.006	-6.5895e-10	-2.83923e-10	-9.89049e-11
		0.00602	-6.5895e-10	-2.82363e-10	-9.95289e-11
		0.00604	-6.58014e-10	-2.82675e-10	-9.92169e-11
		0.00606	-6.5739e-10	-2.82051e-10	-9.92169e-11
		0.00608	-6.56142e-10	-2.80803e-10	-9.95289e-11
		0.0061	-6.53958e-10	-2.78931e-10	-9.92169e-11
		0.00612	-6.52086e-10	-2.77683e-10	-9.92169e-11
		0.00614	-6.51774e-10	-2.76123e-10	-9.76569e-11
		0.00616	-6.51462e-10	-2.77059e-10	-9.76569e-11
		0.00618	-6.53022e-10	-2.79243e-10	-9.70329e-11
		0.0062	-6.54894e-10	-2.80491e-10	-9.73449e-11
		0.00622	-6.56766e-10	-2.79867e-10	-9.82809e-11
		0.00624	-6.57078e-10	-2.77371e-10	-9.79689e-11
		0.00626	-6.54582e-10	-2.73627e-10	-9.67209e-11
		0.00628	-6.5115e-10	-2.68011e-10	-9.57849e-11
		0.0063	-6.4803e-10	-2.62394e-10	-9.36009e-11
		0.00632	-6.4335e-10	-2.5553e-10	-8.98568e-11
		0.00634	-6.39294e-10	-2.48354e-10	-8.61128e-11
		0.00636	-6.34926e-10	-2.3993e-10	-8.26808e-11
		0.00638	-6.31182e-10	-2.3369e-10	-7.86247e-11
		0.0064	-6.27438e-10	-2.26826e-10	-7.45687e-11
		0.00642	-6.24942e-10	-2.2277e-10	-6.95766e-11
		0.00644	-6.21822e-10	-2.20274e-10	-6.55206e-11
		0.00646	-6.19326e-10	-2.18402e-10	-6.14646e-11
		0.00648	-6.1683e-10	-2.15906e-10	-5.77205e-11
		0.0065	-6.1527e-10	-2.14346e-10	-5.49125e-11
		0.00652	-6.14334e-10	-2.12786e-10	-5.17925e-11
		0.00654	-6.14022e-10	-2.09978e-10	-4.96085e-11
		0.00656	-6.14334e-10	-2.06546e-10	-4.71124e-11
		0.00658	-6.14334e-10	-2.03426e-10	-4.46164e-11
		0.0066	-6.1371e-10	-2.00618e-10	-4.18084e-11
		0.00662	-6.13086e-10	-1.98746e-10	-4.02484e-11
		0.00664	-6.11838e-10	-1.98746e-10	-3.83764e-11
		0.00666	-6.11214e-10	-2.00618e-10	-3.65043e-11
		0.00668	-6.11214e-10	-2.04362e-10	-3.49443e-11
		0.0067	-6.10902e-10	-2.0717e-10	-3.49443e-11
		0.00672	-6.1059e-10	-2.09354e-10	-3.49443e-11
		0.00674	-6.11526e-10	-2.12786e-10	-3.58803e-11
		0.00676	-6.11526e-10	-2.1497e-10	-3.58803e-11
		0.00678	-6.11838e-10	-2.17466e-10	-3.71283e-11
		0.0068	-6.12462e-10	-2.19338e-10	-3.77524e-11
		0.00682	-6.13086e-10	-2.19962e-10	-3.61923e-11
		0.00684	-6.13398e-10	-2.21522e-10	-3.55683e-11
		0.00686	-6.13086e-10	-2.21834e-10	-3.40083e-11
		0.00688	-6.12462e-10	-2.22146e-10	-3.27603e-11
		0.0069	-6.1059e-10	-2.21834e-10	-3.30723e-11
		0.00692	-6.11214e-10	-2.22458e-10	-3.33843e-11
		0.00694	-6.10902e-10	-2.23082e-10	-3.27603e-11
		0.00696	-6.1215e-10	-2.2433e-10	-3.30723e-11
		0.00698	-6.12462e-10	-2.24954e-10	-3.30723e-11
		0.007	-6.14022e-10	-2.24642e-10	-3.21363e-11
		0.00702	-6.1527e-10	-2.25266e-10	-3.24483e-11
		0.00704	-6.1527e-10	-2.24954e-10	-3.21363e-11
		0.00706	-6.14334e-10	-2.2433e-10	-3.30723e-11
		0.00708	-6.1371e-10	-2.23706e-10	-3.36963e-11
		0.0071	-6.13086e-10	-2.23394e-10	-3.52563e-11
		0.00712	-6.11838e-10	-2.2433e-10	-3.49443e-11
		0.00714	-6.11838e-10	-2.23706e-10	-3.43203e-11
		0.00716	-6.11214e-10	-2.23394e-10	-3.40083e-11
		0.00718	-6.10278e-10	-2.2277e-10	-3.36963e-11
		0.0072	-6.09966e-10	-2.21834e-10	-3.30723e-11
		0.00722	-6.10902e-10	-2.21834e-10	-3.36963e-11
		0.00724	-6.10902e-10	-2.20274e-10	-3.46323e-11
		0.00726	-6.11526e-10	-2.22146e-10	-3.55683e-11
		0.00728	-6.12462e-10	-2.24954e-10	-3.52563e-11
		0.0073	-6.14334e-10	-2.27762e-10	-3.61923e-11
		0.00732	-6.14646e-10	-2.31194e-10	-3.71283e-11
		0.00734	-6.16206e-10	-2.34002e-10	-3.65043e-11
		0.00736	-6.16518e-10	-2.3681e-10	-3.65043e-11
		0.00738	-6.16518e-10	-2.38058e-10	-3.55683e-11
		0.0074	-6.15894e-10	-2.38058e-10	-3.52563e-11
		0.00742	-6.14022e-10	-2.37434e-10	-3.49443e-11
		0.00744	-6.13086e-10	-2.37122e-10	-3.49443e-11
		0.00746	-6.12462e-10	-2.36498e-10	-3.52563e-11
		0.00748	-6.13398e-10	-2.35874e-10	-3.58803e-11
		0.0075	-6.14334e-10	-2.3525e-10	-3.65043e-11
		0.00752	-6.1683e-10	-2.3525e-10	-3.80644e-11
		0.00754	-6.17454e-10	-2.33378e-10	-4.02484e-11
		0.00756	-6.17454e-10	-2.32754e-10	-4.27444e-11
		0.00758	-6.17142e-10	-2.31818e-10	-4.52404e-11
		0.0076	-6.16518e-10	-2.32754e-10	-4.68004e-11
		0.00762	-6.16518e-10	-2.34002e-10	-4.83605e-11
		0.00764	-6.17142e-10	-2.34314e-10	-4.83605e-11
		0.00766	-6.16518e-10	-2.35562e-10	-4.89845e-11
		0.00768	-6.1683e-10	-2.36498e-10	-4.77364e-11
		0.0077	-6.1527e-10	-2.37434e-10	-4.77364e-11
		0.00772	-6.14334e-10	-2.38682e-10	-4.68004e-11
		0.00774	-6.13398e-10	-2.37434e-10	-4.58644e-11
		0.00776	-6.13398e-10	-2.37434e-10	-4.55524e-11
		0.00778	-6.12774e-10	-2.3681e-10	-4.43044e-11
		0.0078	-6.13398e-10	-2.37746e-10	-4.30564e-11
		0.00782	-6.14334e-10	-2.37434e-10	-4.18084e-11
		0.00784	-6.14022e-10	-2.37434e-10	-4.18084e-11
		0.00786	-6.14958e-10	-2.38682e-10	-4.11844e-11
		0.00788	-6.15582e-10	-2.38682e-10	-4.18084e-11
		0.0079	-6.16518e-10	-2.38058e-10	-4.33684e-11
		0.00792	-6.1527e-10	-2.37746e-10	-4.49284e-11
		0.00794	-6.14022e-10	-2.37434e-10	-4.68004e-11
		0.00796	-6.13086e-10	-2.37746e-10	-4.68004e-11
		0.00798	-6.1371e-10	-2.38682e-10	-4.55524e-11
		0.008	-6.12774e-10	-2.39618e-10	-4.46164e-11
		0.00802	-6.1215e-10	-2.40866e-10	-4.33684e-11
		0.00804	-6.1215e-10	-2.42426e-10	-4.27444e-11
		0.00806	-6.11526e-10	-2.43986e-10	-4.33684e-11
		0.00808	-6.1215e-10	-2.43674e-10	-4.33684e-11
		0.0081	-6.1215e-10	-2.43986e-10	-4.43044e-11
		0.00812	-6.13086e-10	-2.43362e-10	-4.49284e-11
		0.00814	-6.14334e-10	-2.42426e-10	-4.52404e-11
		0.00816	-6.14958e-10	-2.42114e-10	-4.43044e-11
		0.00818	-6.15582e-10	-2.40866e-10	-4.30564e-11
		0.0082	-6.16518e-10	-2.41178e-10	-4.30564e-11
		0.00822	-6.1683e-10	-2.40242e-10	-4.43044e-11
		0.00824	-6.1683e-10	-2.39306e-10	-4.61764e-11
		0.00826	-6.17454e-10	-2.39306e-10	-4.89845e-11
		0.00828	-6.17454e-10	-2.3837e-10	-5.11685e-11
		0.0083	-6.19326e-10	-2.38058e-10	-5.24165e-11
		0.00832	-6.19638e-10	-2.38058e-10	-5.11685e-11
		0.00834	-6.20262e-10	-2.39306e-10	-4.96085e-11
		0.00836	-6.1995e-10	-2.4149e-10	-4.96085e-11
		0.00838	-6.18702e-10	-2.4305e-10	-4.83605e-11
		0.0084	-6.17766e-10	-2.44298e-10	-4.74244e-11
		0.00842	-6.16518e-10	-2.45546e-10	-4.71124e-11
		0.00844	-6.15894e-10	-2.4773e-10	-4.71124e-11
		0.00846	-6.15894e-10	-2.4929e-10	-4.77364e-11
		0.00848	-6.16206e-10	-2.5085e-10	-4.83605e-11
		0.0085	-6.17454e-10	-2.51474e-10	-4.80484e-11
		0.00852	-6.1683e-10	-2.50538e-10	-4.86725e-11
		0.00854	-6.1683e-10	-2.4929e-10	-4.83605e-11
		0.00856	-6.16206e-10	-2.46794e-10	-4.86725e-11
		0.00858	-6.1527e-10	-2.4305e-10	-4.92965e-11
		0.0086	-6.1371e-10	-2.40242e-10	-4.96085e-11
		0.00862	-6.14334e-10	-2.38058e-10	-5.02325e-11
		0.00864	-6.14022e-10	-2.37122e-10	-5.08565e-11
		0.00866	-6.14022e-10	-2.38058e-10	-4.89845e-11
		0.00868	-6.14334e-10	-2.39618e-10	-4.89845e-11
		0.0087	-6.14958e-10	-2.40554e-10	-4.74244e-11
		0.00872	-6.15582e-10	-2.39306e-10	-4.71124e-11
		0.00874	-6.15582e-10	-2.38058e-10	-4.64884e-11
		0.00876	-6.1527e-10	-2.3681e-10	-4.74244e-11
		0.00878	-6.1527e-10	-2.35562e-10	-4.80484e-11
		0.0088	-6.15894e-10	-2.36498e-10	-4.99205e-11
		0.00882	-6.16518e-10	-2.38682e-10	-5.05445e-11
		0.00884	-6.17454e-10	-2.40554e-10	-5.08565e-11
		0.00886	-6.1839e-10	-2.43362e-10	-5.02325e-11
		0.00888	-6.18702e-10	-2.44298e-10	-5.02325e-11
		0.0089	-6.18702e-10	-2.43674e-10	-4.92965e-11
		0.00892	-6.1839e-10	-2.42738e-10	-4.92965e-11
		0.00894	-6.17142e-10	-2.4149e-10	-5.02325e-11
		0.00896	-6.16518e-10	-2.40242e-10	-5.02325e-11
		0.00898	-6.1527e-10	-2.40554e-10	-5.11685e-11
		0.009	-6.16206e-10	-2.40554e-10	-5.14805e-11
		0.00902	-6.16518e-10	-2.4149e-10	-5.24165e-11
		0.00904	-6.1683e-10	-2.40866e-10	-5.27285e-11
		0.00906	-6.1683e-10	-2.41178e-10	-5.24165e-11
		0.00908	-6.15894e-10	-2.4149e-10	-5.24165e-11
		0.0091	-6.14646e-10	-2.41802e-10	-5.24165e-11
		0.00912	-6.1371e-10	-2.43362e-10	-5.30405e-11
		0.00914	-6.13398e-10	-2.45234e-10	-5.27285e-11
		0.00916	-6.14646e-10	-2.45858e-10	-5.27285e-11
		0.00918	-6.15582e-10	-2.46794e-10	-5.21045e-11
		0.0092	-6.16518e-10	-2.46794e-10	-5.24165e-11
		0.00922	-6.17142e-10	-2.4617e-10	-5.30405e-11
		0.00924	-6.17454e-10	-2.45858e-10	-5.21045e-11
		0.00926	-6.17142e-10	-2.45234e-10	-5.27285e-11
		0.00928	-6.16206e-10	-2.45546e-10	-5.27285e-11
		0.0093	-6.14958e-10	-2.44922e-10	-5.21045e-11
		0.00932	-6.14646e-10	-2.44922e-10	-5.27285e-11
		0.00934	-6.14022e-10	-2.45234e-10	-5.33525e-11
		0.00936	-6.13398e-10	-2.43674e-10	-5.39765e-11
		0.00938	-6.13398e-10	-2.42738e-10	-5.42885e-11
		0.0094	-6.12774e-10	-2.42114e-10	-5.36645e-11
		0.00942	-6.11838e-10	-2.41802e-10	-5.42885e-11
		0.00944	-6.10902e-10	-2.4149e-10	-5.42885e-11
		0.00946	-6.11838e-10	-2.42114e-10	-5.42885e-11
		0.00948	-6.11838e-10	-2.42426e-10	-5.36645e-11
		0.0095	-6.12774e-10	-2.43986e-10	-5.24165e-11
		0.00952	-6.14334e-10	-2.43674e-10	-5.21045e-11
		0.00954	-6.1527e-10	-2.42738e-10	-5.17925e-11
		0.00956	-6.14646e-10	-2.42426e-10	-5.30405e-11
		0.00958	-6.14022e-10	-2.4149e-10	-5.33525e-11
		0.0096	-6.14646e-10	-2.40242e-10	-5.42885e-11
		0.00962	-6.14958e-10	-2.40866e-10	-5.42885e-11
		0.00964	-6.15582e-10	-2.41802e-10	-5.46005e-11
		0.00966	-6.17454e-10	-2.43986e-10	-5.52245e-11
		0.00968	-6.17766e-10	-2.45234e-10	-5.55365e-11
		0.0097	-6.19326e-10	-2.44922e-10	-5.52245e-11
		0.00972	-6.19638e-10	-2.45858e-10	-5.64725e-11
		0.00974	-6.19638e-10	-2.45234e-10	-5.64725e-11
		0.00976	-6.19326e-10	-2.44298e-10	-5.74085e-11
		0.00978	-6.19326e-10	-2.43362e-10	-5.77205e-11
		0.0098	-6.1839e-10	-2.43986e-10	-5.67845e-11
		0.00982	-6.1839e-10	-2.44298e-10	-5.58485e-11
		0.00984	-6.17766e-10	-2.44922e-10	-5.42885e-11
		0.00986	-6.18078e-10	-2.44922e-10	-5.42885e-11
		0.00988	-6.17142e-10	-2.4461e-10	-5.46005e-11
		0.0099	-6.17766e-10	-2.44922e-10	-5.55365e-11
		0.00992	-6.16518e-10	-2.4461e-10	-5.64725e-11
		0.00994	-6.16518e-10	-2.44922e-10	-5.67845e-11
		0.00996	-6.1683e-10	-2.4617e-10	-5.70965e-11
		0.00998	-6.17454e-10	-2.48666e-10	-5.52245e-11
		0.01	-6.17454e-10	-2.48354e-10	-5.49125e-11
		0.01002	-6.18078e-10	-2.48042e-10	-5.46005e-11
		0.01004	-6.17766e-10	-2.47106e-10	-5.39765e-11
		0.01006	-6.17766e-10	-2.46794e-10	-5.39765e-11
		0.01008	-6.1683e-10	-2.45546e-10	-5.49125e-11
		0.0101	-6.15582e-10	-2.44298e-10	-5.64725e-11
		0.01012	-6.14646e-10	-2.45858e-10	-5.61605e-11
		0.01014	-6.14022e-10	-2.4617e-10	-5.55365e-11
		0.01016	-6.1371e-10	-2.45858e-10	-5.55365e-11
		0.01018	-6.14334e-10	-2.47106e-10	-5.61605e-11
		0.0102	-6.14022e-10	-2.46482e-10	-5.77205e-11
		0.01022	-6.15582e-10	-2.45858e-10	-5.86565e-11
		0.01024	-6.15582e-10	-2.45546e-10	-5.92806e-11
		0.01026	-6.1527e-10	-2.45546e-10	-5.95926e-11
		0.01028	-6.1527e-10	-2.4773e-10	-5.89686e-11
		0.0103	-6.14958e-10	-2.48978e-10	-5.83445e-11
		0.01032	-6.1683e-10	-2.49914e-10	-5.74085e-11
		0.01034	-6.1683e-10	-2.50538e-10	-5.55365e-11
		0.01036	-6.17142e-10	-2.5085e-10	-5.52245e-11
		0.01038	-6.18078e-10	-2.50226e-10	-5.52245e-11
		0.0104	-6.18078e-10	-2.4929e-10	-5.58485e-11
		0.01042	-6.18078e-10	-2.4773e-10	-5.77205e-11
		0.01044	-6.1839e-10	-2.4929e-10	-5.92806e-11
		0.01046	-6.18078e-10	-2.49602e-10	-5.86565e-11
		0.01048	-6.17142e-10	-2.51474e-10	-5.86565e-11
		0.0105	-6.17454e-10	-2.52098e-10	-5.74085e-11
		0.01052	-6.16518e-10	-2.51786e-10	-5.67845e-11
		0.01054	-6.1683e-10	-2.51786e-10	-5.46005e-11
		0.01056	-6.17454e-10	-2.50538e-10	-5.30405e-11
		0.01058	-6.16518e-10	-2.50226e-10	-5.24165e-11
		0.0106	-6.1683e-10	-2.49602e-10	-5.21045e-11
		0.01062	-6.16206e-10	-2.49602e-10	-5.14805e-11
		0.01064	-6.15894e-10	-2.48978e-10	-5.08565e-11
		0.01066	-6.15894e-10	-2.48042e-10	-5.21045e-11
		0.01068	-6.1683e-10	-2.48666e-10	-5.36645e-11
		0.0107	-6.15894e-10	-2.4929e-10	-5.55365e-11
		0.01072	-6.14958e-10	-2.50226e-10	-5.80325e-11
		0.01074	-6.15582e-10	-2.51474e-10	-5.89686e-11
		0.01076	-6.14958e-10	-2.51162e-10	-5.99046e-11
		0.01078	-6.14334e-10	-2.5241e-10	-5.99046e-11
		0.0108	-6.16206e-10	-2.52722e-10	-5.83445e-11
		0.01082	-6.1683e-10	-2.5241e-10	-5.67845e-11
		0.01084	-6.17142e-10	-2.5241e-10	-5.64725e-11
		0.01086	-6.1683e-10	-2.51162e-10	-5.55365e-11
		0.01088	-6.14958e-10	-2.5085e-10	-5.58485e-11
		0.0109	-6.13086e-10	-2.5085e-10	-5.58485e-11
		0.01092	-6.11526e-10	-2.51786e-10	-5.52245e-11
		0.01094	-6.11526e-10	-2.52722e-10	-5.52245e-11
		0.01096	-6.1215e-10	-2.5397e-10	-5.55365e-11
		0.01098	-6.12462e-10	-2.54594e-10	-5.49125e-11
		0.011	-6.1371e-10	-2.56466e-10	-5.61605e-11
		0.01102	-6.14334e-10	-2.55218e-10	-5.67845e-11
		0.01104	-6.14334e-10	-2.55218e-10	-5.70965e-11
		0.01106	-6.14334e-10	-2.5397e-10	-5.70965e-11
		0.01108	-6.1371e-10	-2.53658e-10	-5.74085e-11
		0.0111	-6.1371e-10	-2.52098e-10	-5.74085e-11
		0.01112	-6.14022e-10	-2.51162e-10	-5.61605e-11
		0.01114	-6.1683e-10	-2.5085e-10	-5.52245e-11
		0.01116	-6.18078e-10	-2.50538e-10	-5.52245e-11
		0.01118	-6.19326e-10	-2.48978e-10	-5.64725e-11
		0.0112	-6.19638e-10	-2.4773e-10	-5.83445e-11
		0.01122	-6.19014e-10	-2.4773e-10	-6.02166e-11
		0.01124	-6.16518e-10	-2.4773e-10	-6.14646e-11
		0.01126	-6.14334e-10	-2.48354e-10	-6.17766e-11
		0.01128	-6.12774e-10	-2.47418e-10	-6.17766e-11
		0.0113	-6.12774e-10	-2.48978e-10	-6.11526e-11
		0.01132	-6.1371e-10	-2.50226e-10	-5.86565e-11
		0.01134	-6.15582e-10	-2.50538e-10	-5.83445e-11
		0.01136	-6.16518e-10	-2.53346e-10	-5.83445e-11
		0.01138	-6.16518e-10	-2.5397e-10	-5.77205e-11
		0.0114	-6.17142e-10	-2.54594e-10	-5.70965e-11
		0.01142	-6.1683e-10	-2.5397e-10	-5.61605e-11
		0.01144	-6.16518e-10	-2.53034e-10	-5.67845e-11
		0.01146	-6.1683e-10	-2.52722e-10	-5.64725e-11
		0.01148	-6.16518e-10	-2.5085e-10	-5.64725e-11
		0.0115	-6.1683e-10	-2.48978e-10	-5.74085e-11
		0.01152	-6.16518e-10	-2.4773e-10	-5.83445e-11
		0.01154	-6.16518e-10	-2.46794e-10	-5.89686e-11
		0.01156	-6.15582e-10	-2.48354e-10	-5.89686e-11
		0.01158	-6.15582e-10	-2.4929e-10	-5.95926e-11
		0.0116	-6.16206e-10	-2.49914e-10	-6.11526e-11
		0.01162	-6.16206e-10	-2.50538e-10	-6.05286e-11
		0.01164	-6.16206e-10	-2.50538e-10	-5.99046e-11
		0.01166	-6.17142e-10	-2.50538e-10	-5.86565e-11
		0.01168	-6.17766e-10	-2.50538e-10	-5.67845e-11
		0.0117	-6.17142e-10	-2.51162e-10	-5.42885e-11
		0.01172	-6.16518e-10	-2.5085e-10	-5.27285e-11
		0.01174	-6.16206e-10	-2.5085e-10	-5.24165e-11
		0.01176	-6.15582e-10	-2.5085e-10	-5.21045e-11
		0.01178	-6.1527e-10	-2.50226e-10	-5.21045e-11
		0.0118	-6.15894e-10	-2.49602e-10	-5.17925e-11
		0.01182	-6.15894e-10	-2.49914e-10	-5.24165e-11
		0.01184	-6.16518e-10	-2.49914e-10	-5.33525e-11
		0.01186	-6.1683e-10	-2.50226e-10	-5.46005e-11
		0.01188	-6.16518e-10	-2.51786e-10	-5.61605e-11
		0.0119	-6.17142e-10	-2.53658e-10	-5.77205e-11
		0.01192	-6.17454e-10	-2.55218e-10	-5.92806e-11
		0.01194	-6.16206e-10	-2.5709e-10	-5.95926e-11
		0.01196	-6.1683e-10	-2.57402e-10	-5.92806e-11
		0.01198	-6.16206e-10	-2.57402e-10	-5.86565e-11
		0.012	-6.17454e-10	-2.56778e-10	-5.86565e-11
		0.01202	-6.1839e-10	-2.56154e-10	-5.95926e-11
		0.01204	-6.18702e-10	-2.55218e-10	-5.95926e-11
		0.01206	-6.17454e-10	-2.55218e-10	-5.92806e-11
		0.01208	-6.17142e-10	-2.54594e-10	-5.83445e-11
		0.0121	-6.15894e-10	-2.54594e-10	-5.86565e-11
		0.01212	-6.16206e-10	-2.5397e-10	-5.80325e-11
		0.01214	-6.15582e-10	-2.54282e-10	-5.74085e-11
		0.01216	-6.15582e-10	-2.53658e-10	-5.67845e-11
		0.01218	-6.16206e-10	-2.53034e-10	-5.67845e-11
		0.0122	-6.1683e-10	-2.53346e-10	-5.67845e-11
		0.01222	-6.17454e-10	-2.51474e-10	-5.74085e-11
		0.01224	-6.18078e-10	-2.50226e-10	-5.70965e-11
		0.01226	-6.17766e-10	-2.49602e-10	-5.67845e-11
		0.01228	-6.1839e-10	-2.49602e-10	-5.55365e-11
		0.0123	-6.18078e-10	-2.48978e-10	-5.61605e-11
		0.01232	-6.17766e-10	-2.49914e-10	-5.70965e-11
		0.01234	-6.17142e-10	-2.50538e-10	-5.77205e-11
		0.01236	-6.16518e-10	-2.49602e-10	-5.83445e-11
		0.01238	-6.1527e-10	-2.48666e-10	-5.89686e-11
		0.0124	-6.14646e-10	-2.48042e-10	-6.02166e-11
		0.01242	-6.13086e-10	-2.46794e-10	-5.99046e-11
		0.01244	-6.13086e-10	-2.45858e-10	-5.92806e-11
		0.01246	-6.1215e-10	-2.46482e-10	-5.99046e-11
		0.01248	-6.12774e-10	-2.46794e-10	-5.92806e-11
		0.0125	-6.1371e-10	-2.47106e-10	-5.99046e-11
		0.01252	-6.14334e-10	-2.4929e-10	-6.08406e-11
		0.01254	-6.14334e-10	-2.49602e-10	-6.14646e-11
		0.01256	-6.1527e-10	-2.50226e-10	-6.30246e-11
		0.01258	-6.15582e-10	-2.50226e-10	-6.30246e-11
		0.0126	-6.15894e-10	-2.51474e-10	-6.24006e-11
		0.01262	-6.16518e-10	-2.52098e-10	-6.17766e-11
		0.01264	-6.17454e-10	-2.53346e-10	-5.95926e-11
		0.01266	-6.1839e-10	-2.54282e-10	-5.80325e-11
		0.01268	-6.18702e-10	-2.54282e-10	-5.80325e-11
		0.0127	-6.17766e-10	-2.5397e-10	-5.77205e-11
		0.01272	-6.17766e-10	-2.5397e-10	-5.74085e-11
		0.01274	-6.16518e-10	-2.5241e-10	-5.83445e-11
		0.01276	-6.15894e-10	-2.51786e-10	-5.80325e-11
		0.01278	-6.15582e-10	-2.51786e-10	-5.70965e-11
		0.0128	-6.1527e-10	-2.52098e-10	-5.67845e-11
		0.01282	-6.1683e-10	-2.5241e-10	-5.58485e-11
		0.01284	-6.17766e-10	-2.54282e-10	-5.55365e-11
		0.01286	-6.18702e-10	-2.5553e-10	-5.70965e-11
		0.01288	-6.19014e-10	-2.55218e-10	-5.74085e-11
		0.0129	-6.19326e-10	-2.5397e-10	-5.77205e-11
		0.01292	-6.17766e-10	-2.51786e-10	-5.83445e-11
		0.01294	-6.1683e-10	-2.4929e-10	-5.74085e-11
		0.01296	-6.15894e-10	-2.47418e-10	-5.74085e-11
		0.01298	-6.14958e-10	-2.46794e-10	-5.61605e-11
		0.013	-6.16206e-10	-2.46794e-10	-5.61605e-11
		0.01302	-6.16206e-10	-2.47418e-10	-5.55365e-11
		0.01304	-6.17766e-10	-2.48042e-10	-5.61605e-11
		0.01306	-6.17142e-10	-2.48978e-10	-5.77205e-11
		0.01308	-6.17454e-10	-2.50538e-10	-5.80325e-11
		0.0131	-6.17142e-10	-2.5241e-10	-5.86565e-11
		0.01312	-6.17454e-10	-2.54906e-10	-5.89686e-11
		0.01314	-6.17454e-10	-2.55218e-10	-5.92806e-11
		0.01316	-6.17766e-10	-2.5553e-10	-5.86565e-11
		0.01318	-6.18702e-10	-2.53658e-10	-5.83445e-11
		0.0132	-6.18702e-10	-2.51786e-10	-5.70965e-11
		0.01322	-6.18702e-10	-2.50226e-10	-5.67845e-11
		0.01324	-6.18702e-10	-2.48354e-10	-5.67845e-11
		0.01326	-6.1839e-10	-2.46794e-10	-5.67845e-11
		0.01328	-6.18078e-10	-2.44922e-10	-5.74085e-11
		0.0133	-6.17454e-10	-2.43986e-10	-5.80325e-11
		0.01332	-6.17454e-10	-2.43986e-10	-6.02166e-11
		0.01334	-6.17454e-10	-2.44922e-10	-6.14646e-11
		0.01336	-6.17142e-10	-2.45858e-10	-6.33366e-11
		0.01338	-6.17454e-10	-2.47106e-10	-6.36486e-11
		0.0134	-6.17142e-10	-2.4929e-10	-6.36486e-11
		0.01342	-6.17142e-10	-2.50538e-10	-6.17766e-11
		0.01344	-6.16518e-10	-2.52098e-10	-6.02166e-11
		0.01346	-6.17142e-10	-2.52722e-10	-5.80325e-11
		0.01348	-6.1683e-10	-2.52098e-10	-5.70965e-11
		0.0135	-6.18078e-10	-2.5241e-10	-5.70965e-11
		0.01352	-6.17142e-10	-2.53034e-10	-5.61605e-11
		0.01354	-6.17454e-10	-2.5241e-10	-5.61605e-11
		0.01356	-6.1839e-10	-2.52098e-10	-5.74085e-11
		0.01358	-6.17454e-10	-2.52098e-10	-5.80325e-11
		0.0136	-6.17766e-10	-2.51474e-10	-5.74085e-11
		0.01362	-6.17454e-10	-2.51786e-10	-5.74085e-11
		0.01364	-6.17454e-10	-2.52098e-10	-5.70965e-11
		0.01366	-6.18078e-10	-2.51786e-10	-5.61605e-11
		0.01368	-6.19014e-10	-2.51162e-10	-5.67845e-11
		0.0137	-6.19014e-10	-2.50226e-10	-5.70965e-11
		0.01372	-6.19014e-10	-2.48978e-10	-5.86565e-11
		0.01374	-6.19014e-10	-2.47106e-10	-5.92806e-11
		0.01376	-6.1839e-10	-2.45858e-10	-5.89686e-11
		0.01378	-6.17766e-10	-2.45234e-10	-5.95926e-11
		0.0138	-6.17766e-10	-2.4617e-10	-5.92806e-11
		0.01382	-6.18702e-10	-2.47106e-10	-5.89686e-11
		0.01384	-6.18702e-10	-2.48666e-10	-5.89686e-11
		0.01386	-6.19326e-10	-2.5085e-10	-5.95926e-11
		0.01388	-6.1839e-10	-2.5241e-10	-6.08406e-11
		0.0139	-6.18702e-10	-2.53346e-10	-6.14646e-11
		0.01392	-6.1839e-10	-2.54282e-10	-6.27126e-11
		0.01394	-6.18702e-10	-2.54906e-10	-6.24006e-11
		0.01396	-6.19014e-10	-2.54594e-10	-6.11526e-11
		0.01398	-6.19326e-10	-2.53346e-10	-6.08406e-11
		0.014	-6.20574e-10	-2.53346e-10	-5.92806e-11
		0.01402	-6.19638e-10	-2.53658e-10	-5.95926e-11
		0.01404	-6.18078e-10	-2.54906e-10	-5.99046e-11
		0.01406	-6.18078e-10	-2.55218e-10	-5.99046e-11
		0.01408	-6.17142e-10	-2.55218e-10	-6.05286e-11
		0.0141	-6.16206e-10	-2.55218e-10	-6.14646e-11
		0.01412	-6.15894e-10	-2.5553e-10	-6.27126e-11
		0.01414	-6.1527e-10	-2.54906e-10	-6.27126e-11
		0.01416	-6.17454e-10	-2.54594e-10	-6.17766e-11
		0.01418	-6.19014e-10	-2.54594e-10	-6.30246e-11
		0.0142	-6.19014e-10	-2.54594e-10	-6.45846e-11
		0.01422	-6.1995e-10	-2.52722e-10	-6.55206e-11
		0.01424	-6.19326e-10	-2.51162e-10	-6.55206e-11
		0.01426	-6.19326e-10	-2.51474e-10	-6.48966e-11
		0.01428	-6.18702e-10	-2.51474e-10	-6.48966e-11
		0.0143	-6.18078e-10	-2.52098e-10	-6.48966e-11
		0.01432	-6.19014e-10	-2.54282e-10	-6.33366e-11
		0.01434	-6.17766e-10	-2.5709e-10	-6.33366e-11
		0.01436	-6.19014e-10	-2.58962e-10	-6.39606e-11
		0.01438	-6.18078e-10	-2.60522e-10	-6.45846e-11
		0.0144	-6.17454e-10	-2.6021e-10	-6.48966e-11
		0.01442	-6.17766e-10	-2.58962e-10	-6.42726e-11
		0.01444	-6.18078e-10	-2.58026e-10	-6.39606e-11
		0.01446	-6.1839e-10	-2.56466e-10	-6.39606e-11
		0.01448	-6.19014e-10	-2.54594e-10	-6.20886e-11
		0.0145	-6.18702e-10	-2.54282e-10	-6.08406e-11
		0.01452	-6.18078e-10	-2.5397e-10	-6.20886e-11
		0.01454	-6.18078e-10	-2.53658e-10	-6.20886e-11
		0.01456	-6.17142e-10	-2.55218e-10	-6.27126e-11
		0.01458	-6.16518e-10	-2.57402e-10	-6.27126e-11
		0.0146	-6.15582e-10	-2.58338e-10	-6.24006e-11
		0.01462	-6.16206e-10	-2.59274e-10	-6.08406e-11
		0.01464	-6.1683e-10	-2.59898e-10	-6.08406e-11
		0.01466	-6.17142e-10	-2.59586e-10	-5.92806e-11
		0.01468	-6.18078e-10	-2.58026e-10	-5.86565e-11
		0.0147	-6.18078e-10	-2.57714e-10	-5.89686e-11
		0.01472	-6.1839e-10	-2.56778e-10	-6.02166e-11
		0.01474	-6.18702e-10	-2.57714e-10	-6.05286e-11
		0.01476	-6.1839e-10	-2.5865e-10	-6.08406e-11
		0.01478	-6.19326e-10	-2.5865e-10	-6.11526e-11
		0.0148	-6.19638e-10	-2.5865e-10	-6.02166e-11
		0.01482	-6.19326e-10	-2.57714e-10	-6.05286e-11
		0.01484	-6.19014e-10	-2.57714e-10	-6.02166e-11
		0.01486	-6.18702e-10	-2.57402e-10	-6.08406e-11
		0.01488	-6.17766e-10	-2.56466e-10	-6.11526e-11
		0.0149	-6.17142e-10	-2.56466e-10	-6.14646e-11
		0.01492	-6.17142e-10	-2.55842e-10	-6.14646e-11
		0.01494	-6.1683e-10	-2.56778e-10	-6.17766e-11
		0.01496	-6.17454e-10	-2.57714e-10	-6.02166e-11
		0.01498	-6.17142e-10	-2.59274e-10	-5.92806e-11
		0.015	-6.1683e-10	-2.61458e-10	-5.92806e-11
		0.01502	-6.16518e-10	-2.6333e-10	-5.99046e-11
		0.01504	-6.17766e-10	-2.6645e-10	-6.05286e-11
		0.01506	-6.18078e-10	-2.70507e-10	-6.11526e-11
		0.01508	-6.19014e-10	-2.75811e-10	-6.27126e-11
		0.0151	-6.18702e-10	-2.81427e-10	-6.30246e-11
		0.01512	-6.19326e-10	-2.89227e-10	-6.14646e-11
		0.01514	-6.19326e-10	-2.97027e-10	-6.02166e-11
		0.01516	-6.19326e-10	-3.03579e-10	-5.89686e-11
		0.01518	-6.19326e-10	-3.08259e-10	-5.86565e-11
		0.0152	-6.18702e-10	-3.09819e-10	-5.89686e-11
		0.01522	-6.18702e-10	-3.08883e-10	-6.05286e-11
		0.01524	-6.18702e-10	-3.07947e-10	-6.24006e-11
		0.01526	-6.18078e-10	-3.06075e-10	-6.27126e-11
		0.01528	-6.17766e-10	-3.04203e-10	-6.27126e-11
		0.0153	-6.17766e-10	-3.02019e-10	-6.17766e-11
		0.01532	-6.19638e-10	-3.00771e-10	-6.05286e-11
		0.01534	-6.20574e-10	-2.98899e-10	-5.92806e-11
		0.01536	-6.22446e-10	-2.97339e-10	-5.83445e-11
		0.01538	-6.23382e-10	-2.94219e-10	-5.83445e-11
		0.0154	-6.23694e-10	-2.91411e-10	-5.99046e-11
		0.01542	-6.23694e-10	-2.89851e-10	-6.08406e-11
		0.01544	-6.22758e-10	-2.88915e-10	-6.14646e-11
		0.01546	-6.2151e-10	-2.87043e-10	-6.27126e-11
		0.01548	-6.19638e-10	-2.85795e-10	-6.20886e-11
		0.0155	-6.17766e-10	-2.83923e-10	-6.27126e-11
		0.01552	-6.1683e-10	-2.82363e-10	-6.27126e-11
		0.01554	-6.16518e-10	-2.79243e-10	-6.33366e-11
		0.01556	-6.16206e-10	-2.76123e-10	-6.33366e-11
		0.01558	-6.17142e-10	-2.73003e-10	-6.27126e-11
		0.0156	-6.1839e-10	-2.70195e-10	-6.36486e-11
		0.01562	-6.18702e-10	-2.67699e-10	-6.17766e-11
		0.01564	-6.19014e-10	-2.66763e-10	-6.24006e-11
		0.01566	-6.20262e-10	-2.6489e-10	-6.17766e-11
		0.01568	-6.21198e-10	-2.63018e-10	-6.20886e-11
		0.0157	-6.22758e-10	-2.61146e-10	-6.20886e-11
		0.01572	-6.25566e-10	-2.6021e-10	-6.27126e-11
		0.01574	-6.28686e-10	-2.6021e-10	-6.24006e-11
		0.01576	-6.3399e-10	-2.6021e-10	-6.17766e-11
		0.01578	-6.40854e-10	-2.6021e-10	-5.99046e-11
		0.0158	-6.47406e-10	-2.60834e-10	-5.92806e-11
		0.01582	-6.53334e-10	-2.6021e-10	-5.80325e-11
		0.01584	-6.58014e-10	-2.59586e-10	-5.70965e-11
		0.01586	-6.60822e-10	-2.60522e-10	-5.67845e-11
		0.01588	-6.63006e-10	-2.58962e-10	-5.83445e-11
		0.0159	-6.63942e-10	-2.58338e-10	-5.95926e-11
		0.01592	-6.64878e-10	-2.57714e-10	-6.05286e-11
		0.01594	-6.6675e-10	-2.55218e-10	-6.14646e-11
		0.01596	-6.67998e-10	-2.5397e-10	-6.24006e-11
		0.01598	-6.69246e-10	-2.52098e-10	-6.08406e-11
		0.016	-6.70494e-10	-2.51474e-10	-6.11526e-11
		0.01602	-6.70182e-10	-2.50226e-10	-6.17766e-11
		0.01604	-6.70806e-10	-2.51786e-10	-6.17766e-11
		0.01606	-6.70182e-10	-2.52098e-10	-6.27126e-11
		0.01608	-6.68622e-10	-2.53658e-10	-6.27126e-11
		0.0161	-6.67998e-10	-2.53034e-10	-6.39606e-11
		0.01612	-6.67686e-10	-2.53658e-10	-6.39606e-11
		0.01614	-6.66438e-10	-2.5397e-10	-6.20886e-11
		0.01616	-6.65502e-10	-2.54282e-10	-6.24006e-11
		0.01618	-6.65814e-10	-2.54282e-10	-6.17766e-11
		0.0162	-6.65502e-10	-2.53346e-10	-6.17766e-11
		0.01622	-6.64878e-10	-2.5397e-10	-6.27126e-11
		0.01624	-6.63318e-10	-2.53346e-10	-6.30246e-11
		0.01626	-6.62382e-10	-2.5397e-10	-6.30246e-11
		0.01628	-6.60822e-10	-2.53658e-10	-6.14646e-11
		0.0163	-6.59262e-10	-2.54282e-10	-6.08406e-11
		0.01632	-6.56766e-10	-2.55218e-10	-6.02166e-11
		0.01634	-6.5583e-10	-2.5553e-10	-6.02166e-11
		0.01636	-6.53646e-10	-2.5553e-10	-6.17766e-11
		0.01638	-6.52086e-10	-2.54906e-10	-6.39606e-11
		0.0164	-6.50838e-10	-2.54906e-10	-6.45846e-11
		0.01642	-6.49278e-10	-2.52722e-10	-6.55206e-11
		0.01644	-6.47718e-10	-2.51474e-10	-6.45846e-11
		0.01646	-6.47406e-10	-2.50226e-10	-6.24006e-11
		0.01648	-6.47094e-10	-2.51162e-10	-6.05286e-11
		0.0165	-6.46782e-10	-2.51786e-10	-5.95926e-11
		0.01652	-6.46782e-10	-2.53034e-10	-5.89686e-11
		0.01654	-6.4647e-10	-2.52722e-10	-5.95926e-11
		0.01656	-6.45534e-10	-2.53346e-10	-6.11526e-11
		0.01658	-6.43038e-10	-2.54282e-10	-6.27126e-11
		0.0166	-6.41166e-10	-2.54594e-10	-6.36486e-11
		0.01662	-6.38358e-10	-2.5553e-10	-6.27126e-11
		0.01664	-6.36798e-10	-2.5553e-10	-6.24006e-11
		0.01666	-6.35238e-10	-2.54282e-10	-6.11526e-11
		0.01668	-6.34926e-10	-2.53346e-10	-6.08406e-11
		0.0167	-6.34926e-10	-2.51786e-10	-6.14646e-11
		0.01672	-6.33678e-10	-2.51162e-10	-6.17766e-11
		0.01674	-6.33054e-10	-2.50538e-10	-6.30246e-11
		0.01676	-6.32118e-10	-2.50226e-10	-6.33366e-11
		0.01678	-6.29934e-10	-2.51162e-10	-6.33366e-11
		0.0168	-6.28998e-10	-2.52722e-10	-6.30246e-11
		0.01682	-6.28062e-10	-2.53034e-10	-6.33366e-11
		0.01684	-6.27126e-10	-2.5241e-10	-6.27126e-11
		0.01686	-6.26502e-10	-2.51162e-10	-6.20886e-11
		0.01688	-6.24942e-10	-2.50538e-10	-6.24006e-11
		0.0169	-6.24318e-10	-2.49914e-10	-6.24006e-11
		0.01692	-6.2307e-10	-2.49602e-10	-6.27126e-11
		0.01694	-6.22134e-10	-2.49914e-10	-6.17766e-11
		0.01696	-6.2307e-10	-2.5085e-10	-6.02166e-11
		0.01698	-6.23382e-10	-2.53034e-10	-5.99046e-11
		0.017	-6.24318e-10	-2.54594e-10	-6.02166e-11
		0.01702	-6.24942e-10	-2.56778e-10	-6.05286e-11
		0.01704	-6.24318e-10	-2.56466e-10	-6.14646e-11
		0.01706	-6.24006e-10	-2.54594e-10	-6.30246e-11
		0.01708	-6.2151e-10	-2.53034e-10	-6.39606e-11
		0.0171	-6.20886e-10	-2.5085e-10	-6.27126e-11
		0.01712	-6.22134e-10	-2.48978e-10	-6.08406e-11
		0.01714	-6.22134e-10	-2.48354e-10	-5.95926e-11
		0.01716	-6.22758e-10	-2.47106e-10	-5.86565e-11
		0.01718	-6.23694e-10	-2.48666e-10	-5.80325e-11
		0.0172	-6.22758e-10	-2.48666e-10	-5.92806e-11
		0.01722	-6.22446e-10	-2.4929e-10	-6.08406e-11
		0.01724	-6.22134e-10	-2.49914e-10	-6.20886e-11
		0.01726	-6.22758e-10	-2.5085e-10	-6.20886e-11
		0.01728	-6.2307e-10	-2.51786e-10	-6.08406e-11
		0.0173	-6.23382e-10	-2.5241e-10	-5.99046e-11
		0.01732	-6.24318e-10	-2.53658e-10	-5.86565e-11
		0.01734	-6.24942e-10	-2.5397e-10	-5.83445e-11
		0.01736	-6.2463e-10	-2.53658e-10	-5.95926e-11
		0.01738	-6.2463e-10	-2.53346e-10	-6.05286e-11
		0.0174	-6.23382e-10	-2.53346e-10	-6.36486e-11
		0.01742	-6.2307e-10	-2.53658e-10	-6.61446e-11
		0.01744	-6.22446e-10	-2.54594e-10	-6.73926e-11
		0.01746	-6.21198e-10	-2.54594e-10	-6.70806e-11
		0.01748	-6.20886e-10	-2.5553e-10	-6.64566e-11
		0.0175	-6.20262e-10	-2.54906e-10	-6.52086e-11
		0.01752	-6.1839e-10	-2.53346e-10	-6.45846e-11
		0.01754	-6.17454e-10	-2.53034e-10	-6.36486e-11
		0.01756	-6.17454e-10	-2.5241e-10	-6.39606e-11
		0.01758	-6.17766e-10	-2.5241e-10	-6.45846e-11
		0.0176	-6.19014e-10	-2.53034e-10	-6.39606e-11
		0.01762	-6.18702e-10	-2.52098e-10	-6.20886e-11
		0.01764	-6.19326e-10	-2.53658e-10	-6.05286e-11
		0.01766	-6.20574e-10	-2.54594e-10	-5.95926e-11
		0.01768	-6.20886e-10	-2.54906e-10	-5.86565e-11
		0.0177	-6.20886e-10	-2.56466e-10	-5.89686e-11
		0.01772	-6.20886e-10	-2.56466e-10	-6.05286e-11
		0.01774	-6.21198e-10	-2.56466e-10	-6.20886e-11
		0.01776	-6.21198e-10	-2.5553e-10	-6.27126e-11
		0.01778	-6.21822e-10	-2.55842e-10	-6.24006e-11
		0.0178	-6.21198e-10	-2.58026e-10	-6.17766e-11
		0.01782	-6.22446e-10	-2.5865e-10	-6.11526e-11
		0.01784	-6.22446e-10	-2.5865e-10	-6.02166e-11
		0.01786	-6.22446e-10	-2.57402e-10	-5.95926e-11
		0.01788	-6.22446e-10	-2.5709e-10	-5.99046e-11
		0.0179	-6.21822e-10	-2.5553e-10	-6.14646e-11
		0.01792	-6.22134e-10	-2.55218e-10	-6.33366e-11
		0.01794	-6.20886e-10	-2.54906e-10	-6.42726e-11
		0.01796	-6.21822e-10	-2.54906e-10	-6.39606e-11
		0.01798	-6.20886e-10	-2.56778e-10	-6.30246e-11
		0.018	-6.21198e-10	-2.56778e-10	-6.20886e-11
		0.01802	-6.22134e-10	-2.56778e-10	-6.11526e-11
		0.01804	-6.2151e-10	-2.56466e-10	-6.14646e-11
		0.01806	-6.21198e-10	-2.55842e-10	-6.27126e-11
		0.01808	-6.2151e-10	-2.5553e-10	-6.39606e-11
		0.0181	-6.21198e-10	-2.54282e-10	-6.45846e-11
		0.01812	-6.20886e-10	-2.53346e-10	-6.55206e-11
		0.01814	-6.22134e-10	-2.53034e-10	-6.55206e-11
		0.01816	-6.23382e-10	-2.53034e-10	-6.58326e-11
		0.01818	-6.24318e-10	-2.5397e-10	-6.55206e-11
		0.0182	-6.25254e-10	-2.53346e-10	-6.48966e-11
		0.01822	-6.25254e-10	-2.51474e-10	-6.42726e-11
		0.01824	-6.2463e-10	-2.48978e-10	-6.24006e-11
		0.01826	-6.22758e-10	-2.46482e-10	-5.99046e-11
		0.01828	-6.22134e-10	-2.4461e-10	-5.80325e-11
		0.0183	-6.20886e-10	-2.45858e-10	-5.67845e-11
		0.01832	-6.20886e-10	-2.48978e-10	-5.64725e-11
		0.01834	-6.21822e-10	-2.52098e-10	-5.70965e-11
		0.01836	-6.20574e-10	-2.54594e-10	-5.74085e-11
		0.01838	-6.20886e-10	-2.56154e-10	-5.80325e-11
		0.0184	-6.22134e-10	-2.56778e-10	-5.95926e-11
		0.01842	-6.22446e-10	-2.5553e-10	-6.08406e-11
		0.01844	-6.2307e-10	-2.5553e-10	-6.20886e-11
		0.01846	-6.23694e-10	-2.54282e-10	-6.24006e-11
		0.01848	-6.24006e-10	-2.54282e-10	-6.30246e-11
		0.0185	-6.23382e-10	-2.55218e-10	-6.30246e-11
		0.01852	-6.2307e-10	-2.55842e-10	-6.36486e-11
		0.01854	-6.21822e-10	-2.56778e-10	-6.39606e-11
		0.01856	-6.20886e-10	-2.58026e-10	-6.42726e-11
		0.01858	-6.19638e-10	-2.57714e-10	-6.48966e-11
		0.0186	-6.1839e-10	-2.56154e-10	-6.45846e-11
		0.01862	-6.1839e-10	-2.54282e-10	-6.36486e-11
		0.01864	-6.18702e-10	-2.52722e-10	-6.33366e-11
		0.01866	-6.20574e-10	-2.51162e-10	-6.05286e-11
		0.01868	-6.20262e-10	-2.51162e-10	-6.11526e-11
		0.0187	-6.20574e-10	-2.5241e-10	-6.02166e-11
		0.01872	-6.19326e-10	-2.53658e-10	-6.11526e-11
		0.01874	-6.18078e-10	-2.54906e-10	-6.27126e-11
		0.01876	-6.1839e-10	-2.56154e-10	-6.27126e-11
		0.01878	-6.18078e-10	-2.57402e-10	-6.30246e-11
		0.0188	-6.19638e-10	-2.58026e-10	-6.24006e-11
		0.01882	-6.2151e-10	-2.57714e-10	-6.17766e-11
		0.01884	-6.21822e-10	-2.57714e-10	-6.08406e-11
		0.01886	-6.22758e-10	-2.57402e-10	-6.02166e-11
		0.01888	-6.22758e-10	-2.55842e-10	-5.99046e-11
		0.0189	-6.2151e-10	-2.54906e-10	-6.14646e-11
		0.01892	-6.20574e-10	-2.54282e-10	-6.20886e-11
		0.01894	-6.20262e-10	-2.53658e-10	-6.33366e-11
		0.01896	-6.20574e-10	-2.53034e-10	-6.36486e-11
		0.01898	-6.19326e-10	-2.52098e-10	-6.33366e-11
		0.019	-6.19638e-10	-2.5241e-10	-6.27126e-11
		0.01902	-6.21198e-10	-2.52098e-10	-6.11526e-11
		0.01904	-6.20574e-10	-2.51474e-10	-6.05286e-11
		0.01906	-6.19638e-10	-2.52098e-10	-5.99046e-11
		0.01908	-6.19014e-10	-2.5085e-10	-6.08406e-11
		0.0191	-6.18078e-10	-2.5085e-10	-6.24006e-11
		0.01912	-6.18702e-10	-2.51162e-10	-6.30246e-11
		0.01914	-6.1839e-10	-2.5085e-10	-6.36486e-11
		0.01916	-6.19326e-10	-2.51474e-10	-6.42726e-11
		0.01918	-6.1995e-10	-2.51786e-10	-6.30246e-11
		0.0192	-6.1995e-10	-2.52098e-10	-6.27126e-11
		0.01922	-6.19638e-10	-2.51474e-10	-6.27126e-11
		0.01924	-6.18702e-10	-2.5085e-10	-6.17766e-11
		0.01926	-6.1839e-10	-2.50538e-10	-6.24006e-11
		0.01928	-6.19326e-10	-2.51162e-10	-6.30246e-11
		0.0193	-6.18702e-10	-2.51786e-10	-6.30246e-11
		0.01932	-6.19638e-10	-2.53346e-10	-6.17766e-11
		0.01934	-6.20574e-10	-2.5397e-10	-6.11526e-11
		0.01936	-6.1995e-10	-2.55218e-10	-6.11526e-11
		0.01938	-6.19014e-10	-2.54906e-10	-6.17766e-11
		0.0194	-6.18702e-10	-2.54906e-10	-6.17766e-11
		0.01942	-6.1839e-10	-2.54282e-10	-6.24006e-11
		0.01944	-6.18702e-10	-2.53658e-10	-6.17766e-11
		0.01946	-6.19014e-10	-2.54282e-10	-6.24006e-11
		0.01948	-6.19326e-10	-2.53346e-10	-6.33366e-11
		0.0195	-6.20262e-10	-2.53658e-10	-6.36486e-11
		0.01952	-6.19326e-10	-2.52722e-10	-6.33366e-11
		0.01954	-6.19326e-10	-2.51786e-10	-6.39606e-11
		0.01956	-6.18702e-10	-2.51162e-10	-6.52086e-11
		0.01958	-6.19014e-10	-2.50226e-10	-6.48966e-11
		0.0196	-6.18078e-10	-2.5085e-10	-6.42726e-11
		0.01962	-6.1839e-10	-2.51786e-10	-6.48966e-11
		0.01964	-6.18702e-10	-2.5241e-10	-6.36486e-11
		0.01966	-6.20886e-10	-2.53658e-10	-6.36486e-11
		0.01968	-6.20574e-10	-2.5397e-10	-6.36486e-11
		0.0197	-6.20886e-10	-2.53658e-10	-6.33366e-11
		0.01972	-6.20262e-10	-2.53034e-10	-6.39606e-11
		0.01974	-6.19326e-10	-2.50226e-10	-6.33366e-11
		0.01976	-6.19638e-10	-2.4929e-10	-6.27126e-11
		0.01978	-6.19638e-10	-2.48666e-10	-6.27126e-11
		0.0198	-6.19326e-10	-2.48978e-10	-6.30246e-11
		0.01982	-6.19014e-10	-2.50226e-10	-6.36486e-11
		0.01984	-6.19014e-10	-2.51162e-10	-6.30246e-11
		0.01986	-6.18702e-10	-2.53034e-10	-6.30246e-11
		0.01988	-6.19014e-10	-2.5397e-10	-6.42726e-11
		0.0199	-6.19326e-10	-2.54594e-10	-6.39606e-11
		0.01992	-6.19638e-10	-2.54594e-10	-6.48966e-11
		0.01994	-6.20886e-10	-2.54282e-10	-6.36486e-11
		0.01996	-6.21198e-10	-2.54282e-10	-6.33366e-11
		0.01998	-6.21822e-10	-2.53034e-10	-6.20886e-11
		0.02	-6.2151e-10	-2.52722e-10	-6.17766e-11
		0.02002	-6.20886e-10	-2.51162e-10	-6.24006e-11
		0.02004	-6.20886e-10	-2.50538e-10	-6.27126e-11
		0.02006	-6.20886e-10	-2.50226e-10	-6.33366e-11
		0.02008	-6.20262e-10	-2.50538e-10	-6.39606e-11
		0.0201	-6.19326e-10	-2.51786e-10	-6.39606e-11
		0.02012	-6.1995e-10	-2.53346e-10	-6.39606e-11
		0.02014	-6.19638e-10	-2.5553e-10	-6.45846e-11
		0.02016	-6.19638e-10	-2.57402e-10	-6.36486e-11
		0.02018	-6.19326e-10	-2.5709e-10	-6.30246e-11
		0.0202	-6.19014e-10	-2.56778e-10	-6.39606e-11
		0.02022	-6.17454e-10	-2.54594e-10	-6.45846e-11
		0.02024	-6.16206e-10	-2.52722e-10	-6.42726e-11
		0.02026	-6.14958e-10	-2.51786e-10	-6.48966e-11
		0.02028	-6.14646e-10	-2.50538e-10	-6.52086e-11
		0.0203	-6.14958e-10	-2.50226e-10	-6.45846e-11
		0.02032	-6.15894e-10	-2.5085e-10	-6.30246e-11
		0.02034	-6.16518e-10	-2.51786e-10	-6.20886e-11
		0.02036	-6.18078e-10	-2.5241e-10	-6.02166e-11
		0.02038	-6.19014e-10	-2.51786e-10	-5.86565e-11
		0.0204	-6.19638e-10	-2.51474e-10	-5.83445e-11
		0.02042	-6.19326e-10	-2.5085e-10	-5.80325e-11
		0.02044	-6.19014e-10	-2.49914e-10	-5.83445e-11
		0.02046	-6.19326e-10	-2.48666e-10	-5.92806e-11
		0.02048	-6.17766e-10	-2.4929e-10	-5.95926e-11
		0.0205	-6.17142e-10	-2.51162e-10	-5.95926e-11
		0.02052	-6.16518e-10	-2.53346e-10	-6.02166e-11
		0.02054	-6.1683e-10	-2.55218e-10	-6.11526e-11
		0.02056	-6.16518e-10	-2.55842e-10	-6.27126e-11
		0.02058	-6.17454e-10	-2.55218e-10	-6.27126e-11
		0.0206	-6.1839e-10	-2.5397e-10	-6.33366e-11
		0.02062	-6.19014e-10	-2.53658e-10	-6.33366e-11
		0.02064	-6.19638e-10	-2.52098e-10	-6.17766e-11
		0.02066	-6.20262e-10	-2.52098e-10	-6.02166e-11
		0.02068	-6.2151e-10	-2.52098e-10	-5.89686e-11
		0.0207	-6.22758e-10	-2.51474e-10	-5.83445e-11
		0.02072	-6.22134e-10	-2.50538e-10	-5.86565e-11
		0.02074	-6.21822e-10	-2.5085e-10	-5.99046e-11
		0.02076	-6.20262e-10	-2.50538e-10	-6.11526e-11
		0.02078	-6.1995e-10	-2.51162e-10	-6.20886e-11
		0.0208	-6.19638e-10	-2.52098e-10	-6.24006e-11
		0.02082	-6.19014e-10	-2.5241e-10	-6.24006e-11
		0.02084	-6.19638e-10	-2.51786e-10	-6.20886e-11
		0.02086	-6.1839e-10	-2.52098e-10	-6.27126e-11
		0.02088	-6.17766e-10	-2.5085e-10	-6.27126e-11
		0.0209	-6.17142e-10	-2.49914e-10	-6.30246e-11
		0.02092	-6.17454e-10	-2.48978e-10	-6.36486e-11
		0.02094	-6.16518e-10	-2.50538e-10	-6.36486e-11
		0.02096	-6.16518e-10	-2.51474e-10	-6.36486e-11
		0.02098	-6.16518e-10	-2.5241e-10	-6.20886e-11
		0.021	-6.1683e-10	-2.54594e-10	-6.08406e-11
		0.02102	-6.16206e-10	-2.5553e-10	-6.14646e-11
		0.02104	-6.15582e-10	-2.5553e-10	-6.17766e-11
		0.02106	-6.14958e-10	-2.54594e-10	-6.30246e-11
		0.02108	-6.14334e-10	-2.54282e-10	-6.42726e-11
		0.0211	-6.14958e-10	-2.53034e-10	-6.45846e-11
		0.02112	-6.16518e-10	-2.51786e-10	-6.48966e-11
		0.02114	-6.1683e-10	-2.5085e-10	-6.30246e-11
		0.02116	-6.17454e-10	-2.51474e-10	-6.11526e-11
		0.02118	-6.17142e-10	-2.50538e-10	-5.95926e-11
		0.0212	-6.18078e-10	-2.50538e-10	-5.86565e-11
		0.02122	-6.18702e-10	-2.50226e-10	-5.83445e-11
		0.02124	-6.18702e-10	-2.49914e-10	-5.89686e-11
		0.02126	-6.18702e-10	-2.4929e-10	-5.95926e-11
		0.02128	-6.19326e-10	-2.48978e-10	-6.05286e-11
		0.0213	-6.19014e-10	-2.4929e-10	-6.05286e-11
		0.02132	-6.19014e-10	-2.4929e-10	-6.20886e-11
		0.02134	-6.19638e-10	-2.50226e-10	-6.27126e-11
		0.02136	-6.20886e-10	-2.52722e-10	-6.33366e-11
		0.02138	-6.21198e-10	-2.53346e-10	-6.42726e-11
		0.0214	-6.20886e-10	-2.53346e-10	-6.48966e-11
		0.02142	-6.20886e-10	-2.52722e-10	-6.58326e-11
		0.02144	-6.1995e-10	-2.51474e-10	-6.58326e-11
		0.02146	-6.20262e-10	-2.51474e-10	-6.39606e-11
		0.02148	-6.19638e-10	-2.51162e-10	-6.24006e-11
		0.0215	-6.1995e-10	-2.51786e-10	-6.14646e-11
		0.02152	-6.19326e-10	-2.5397e-10	-6.08406e-11
		0.02154	-6.18702e-10	-2.55218e-10	-6.24006e-11
		0.02156	-6.1839e-10	-2.54594e-10	-6.39606e-11
		0.02158	-6.17142e-10	-2.54594e-10	-6.52086e-11
		0.0216	-6.17142e-10	-2.5241e-10	-6.67686e-11
		0.02162	-6.17142e-10	-2.49914e-10	-6.77046e-11
		0.02164	-6.17766e-10	-2.48354e-10	-6.86406e-11
		0.02166	-6.18702e-10	-2.48354e-10	-6.86406e-11
		0.02168	-6.19638e-10	-2.48978e-10	-6.77046e-11
		0.0217	-6.20886e-10	-2.50538e-10	-6.52086e-11
		0.02172	-6.1995e-10	-2.50226e-10	-6.14646e-11
		0.02174	-6.19326e-10	-2.50226e-10	-5.95926e-11
		0.02176	-6.17766e-10	-2.49914e-10	-5.70965e-11
		0.02178	-6.17142e-10	-2.49602e-10	-5.58485e-11
		0.0218	-6.17142e-10	-2.49914e-10	-5.64725e-11
		0.02182	-6.17766e-10	-2.48978e-10	-5.77205e-11
		0.02184	-6.19638e-10	-2.4929e-10	-5.86565e-11
		0.02186	-6.20574e-10	-2.4929e-10	-6.27126e-11
		0.02188	-6.21198e-10	-2.4929e-10	-6.48966e-11
		0.0219	-6.22446e-10	-2.48978e-10	-6.64566e-11
		0.02192	-6.20886e-10	-2.4929e-10	-6.70806e-11
		0.02194	-6.1995e-10	-2.48978e-10	-6.86406e-11
		0.02196	-6.19014e-10	-2.48978e-10	-6.92646e-11
		0.02198	-6.19014e-10	-2.49914e-10	-6.83286e-11
		0.022	-6.1839e-10	-2.49914e-10	-6.73926e-11
		0.02202	-6.19326e-10	-2.5085e-10	-6.70806e-11
		0.02204	-6.19638e-10	-2.52722e-10	-6.77046e-11
		0.02206	-6.1995e-10	-2.52722e-10	-6.61446e-11
		0.02208	-6.19326e-10	-2.53034e-10	-6.58326e-11
		0.0221	-6.19326e-10	-2.52722e-10	-6.42726e-11
		0.02212	-6.18702e-10	-2.52722e-10	-6.39606e-11
		0.02214	-6.18702e-10	-2.52722e-10	-6.27126e-11
		0.02216	-6.19326e-10	-2.53658e-10	-6.30246e-11
		0.02218	-6.1839e-10	-2.54906e-10	-6.27126e-11
		0.0222	-6.18078e-10	-2.55218e-10	-6.36486e-11
		0.02222	-6.1683e-10	-2.55842e-10	-6.52086e-11
		0.02224	-6.17766e-10	-2.56154e-10	-6.64566e-11
		0.02226	-6.17766e-10	-2.5709e-10	-6.77046e-11
		0.02228	-6.17766e-10	-2.5709e-10	-6.77046e-11
		0.0223	-6.1839e-10	-2.58962e-10	-6.61446e-11
		0.02232	-6.19014e-10	-2.59586e-10	-6.52086e-11
		0.02234	-6.19638e-10	-2.6021e-10	-6.39606e-11
		0.02236	-6.19326e-10	-2.59586e-10	-6.36486e-11
		0.02238	-6.19326e-10	-2.59274e-10	-6.30246e-11
		0.0224	-6.19014e-10	-2.58962e-10	-6.24006e-11
		0.02242	-6.18702e-10	-2.58338e-10	-6.30246e-11
		0.02244	-6.18702e-10	-2.57402e-10	-6.36486e-11
		0.02246	-6.19638e-10	-2.56778e-10	-6.36486e-11
		0.02248	-6.20574e-10	-2.56154e-10	-6.33366e-11
		0.0225	-6.21822e-10	-2.55218e-10	-6.30246e-11
		0.02252	-6.22446e-10	-2.54594e-10	-6.36486e-11
		0.02254	-6.22446e-10	-2.53658e-10	-6.36486e-11
		0.02256	-6.2151e-10	-2.51474e-10	-6.33366e-11
		0.02258	-6.1995e-10	-2.50538e-10	-6.45846e-11
		0.0226	-6.19326e-10	-2.49602e-10	-6.48966e-11
		0.02262	-6.17766e-10	-2.49914e-10	-6.42726e-11
		0.02264	-6.17142e-10	-2.50538e-10	-6.42726e-11
		0.02266	-6.17454e-10	-2.53034e-10	-6.36486e-11
		0.02268	-6.18078e-10	-2.55218e-10	-6.42726e-11
		0.0227	-6.1839e-10	-2.56466e-10	-6.36486e-11
		0.02272	-6.16518e-10	-2.58338e-10	-6.39606e-11
		0.02274	-6.15582e-10	-2.59274e-10	-6.39606e-11
		0.02276	-6.14958e-10	-2.59898e-10	-6.27126e-11
		0.02278	-6.16206e-10	-2.59274e-10	-6.30246e-11
		0.0228	-6.17454e-10	-2.58026e-10	-6.24006e-11
		0.02282	-6.19326e-10	-2.57402e-10	-6.20886e-11
		0.02284	-6.2151e-10	-2.55218e-10	-6.27126e-11
		0.02286	-6.2307e-10	-2.53346e-10	-6.39606e-11
		0.02288	-6.2307e-10	-2.5085e-10	-6.52086e-11
		0.0229	-6.22446e-10	-2.49602e-10	-6.61446e-11
		0.02292	-6.2151e-10	-2.48978e-10	-6.64566e-11
		0.02294	-6.20262e-10	-2.47106e-10	-6.61446e-11
		0.02296	-6.19638e-10	-2.46482e-10	-6.48966e-11
		0.02298	-6.17766e-10	-2.44298e-10	-6.48966e-11
		0.023	-6.16518e-10	-2.4305e-10	-6.42726e-11
		0.02302	-6.1527e-10	-2.43362e-10	-6.42726e-11
		0.02304	-6.1527e-10	-2.43986e-10	-6.27126e-11
		0.02306	-6.1527e-10	-2.44922e-10	-6.24006e-11
		0.02308	-6.16206e-10	-2.47106e-10	-6.33366e-11
		0.0231	-6.17766e-10	-2.48042e-10	-6.39606e-11
		0.02312	-6.19014e-10	-2.50226e-10	-6.42726e-11
		0.02314	-6.19014e-10	-2.50226e-10	-6.48966e-11
		0.02316	-6.19014e-10	-2.4929e-10	-6.45846e-11
		0.02318	-6.18702e-10	-2.48666e-10	-6.45846e-11
		0.0232	-6.1839e-10	-2.47418e-10	-6.45846e-11
		0.02322	-6.17454e-10	-2.47106e-10	-6.45846e-11
		0.02324	-6.17142e-10	-2.47106e-10	-6.42726e-11
		0.02326	-6.17454e-10	-2.47106e-10	-6.36486e-11
		0.02328	-6.18078e-10	-2.4617e-10	-6.24006e-11
		0.0233	-6.19638e-10	-2.46482e-10	-6.17766e-11
		0.02332	-6.21822e-10	-2.46794e-10	-6.08406e-11
		0.02334	-6.2307e-10	-2.4773e-10	-6.08406e-11
		0.02336	-6.23382e-10	-2.48978e-10	-6.08406e-11
		0.02338	-6.22446e-10	-2.50226e-10	-6.08406e-11
		0.0234	-6.21198e-10	-2.5085e-10	-6.20886e-11
		0.02342	-6.20262e-10	-2.5085e-10	-6.33366e-11
		0.02344	-6.18702e-10	-2.51786e-10	-6.33366e-11
		0.02346	-6.19014e-10	-2.51786e-10	-6.30246e-11
		0.02348	-6.17766e-10	-2.51786e-10	-6.30246e-11
		0.0235	-6.17766e-10	-2.5085e-10	-6.30246e-11
		0.02352	-6.17766e-10	-2.5241e-10	-6.33366e-11
		0.02354	-6.17766e-10	-2.53034e-10	-6.42726e-11
		0.02356	-6.1839e-10	-2.53346e-10	-6.48966e-11
		0.02358	-6.19638e-10	-2.53346e-10	-6.48966e-11
		0.0236	-6.1995e-10	-2.52722e-10	-6.36486e-11
		0.02362	-6.21198e-10	-2.52722e-10	-6.24006e-11
		0.02364	-6.21822e-10	-2.53658e-10	-6.05286e-11
		0.02366	-6.21822e-10	-2.54282e-10	-6.02166e-11
		0.02368	-6.2151e-10	-2.55842e-10	-6.08406e-11
		0.0237	-6.20886e-10	-2.56778e-10	-6.02166e-11
		0.02372	-6.18702e-10	-2.58338e-10	-6.17766e-11
		0.02374	-6.17142e-10	-2.5865e-10	-6.27126e-11
		0.02376	-6.16518e-10	-2.58962e-10	-6.36486e-11
		0.02378	-6.16518e-10	-2.59586e-10	-6.27126e-11
		0.0238	-6.17454e-10	-2.60834e-10	-6.11526e-11
		0.02382	-6.1839e-10	-2.60834e-10	-6.11526e-11
		0.02384	-6.20262e-10	-2.60834e-10	-6.11526e-11
		0.02386	-6.2151e-10	-2.60522e-10	-6.11526e-11
		0.02388	-6.21198e-10	-2.59898e-10	-6.30246e-11
		0.0239	-6.20886e-10	-2.5865e-10	-6.55206e-11
		0.02392	-6.20886e-10	-2.57402e-10	-6.80166e-11
		0.02394	-6.21198e-10	-2.56778e-10	-6.77046e-11
		0.02396	-6.20262e-10	-2.5709e-10	-6.70806e-11
		0.02398	-6.1995e-10	-2.57714e-10	-6.70806e-11
		0.024	-6.19014e-10	-2.58338e-10	-6.58326e-11
		0.02402	-6.19014e-10	-2.58338e-10	-6.48966e-11
		0.02404	-6.19326e-10	-2.57402e-10	-6.61446e-11
		0.02406	-6.19014e-10	-2.56778e-10	-6.55206e-11
		0.02408	-6.18702e-10	-2.5553e-10	-6.61446e-11
		0.0241	-6.1839e-10	-2.54906e-10	-6.64566e-11
		0.02412	-6.19014e-10	-2.5397e-10	-6.55206e-11
		0.02414	-6.18702e-10	-2.53346e-10	-6.58326e-11
		0.02416	-6.18702e-10	-2.53346e-10	-6.52086e-11
		0.02418	-6.18078e-10	-2.53034e-10	-6.39606e-11
		0.0242	-6.18702e-10	-2.5241e-10	-6.30246e-11
		0.02422	-6.17766e-10	-2.53034e-10	-6.24006e-11
		0.02424	-6.17142e-10	-2.53346e-10	-6.24006e-11
		0.02426	-6.16518e-10	-2.53658e-10	-6.27126e-11
		0.02428	-6.17142e-10	-2.53346e-10	-6.20886e-11
		0.0243	-6.18702e-10	-2.53346e-10	-6.20886e-11
		0.02432	-6.20574e-10	-2.53034e-10	-6.27126e-11
		0.02434	-6.22446e-10	-2.53346e-10	-6.33366e-11
		0.02436	-6.22134e-10	-2.53658e-10	-6.48966e-11
		0.02438	-6.2151e-10	-2.53346e-10	-6.55206e-11
		0.0244	-6.20262e-10	-2.54594e-10	-6.58326e-11
		0.02442	-6.19326e-10	-2.5397e-10	-6.64566e-11
		0.02444	-6.18702e-10	-2.5397e-10	-6.52086e-11
		0.02446	-6.19326e-10	-2.5397e-10	-6.36486e-11
		0.02448	-6.1995e-10	-2.5397e-10	-6.24006e-11
		0.0245	-6.19638e-10	-2.52722e-10	-6.05286e-11
		0.02452	-6.20886e-10	-2.51786e-10	-5.99046e-11
		0.02454	-6.20886e-10	-2.51474e-10	-6.14646e-11
		0.02456	-6.19638e-10	-2.51786e-10	-6.27126e-11
		0.02458	-6.1839e-10	-2.51786e-10	-6.33366e-11
		0.0246	-6.17454e-10	-2.51162e-10	-6.45846e-11
		0.02462	-6.1683e-10	-2.5085e-10	-6.45846e-11
		0.02464	-6.16518e-10	-2.52098e-10	-6.52086e-11
		0.02466	-6.16518e-10	-2.51162e-10	-6.52086e-11
		0.02468	-6.16518e-10	-2.5085e-10	-6.48966e-11
		0.0247	-6.16518e-10	-2.5085e-10	-6.45846e-11
		0.02472	-6.18078e-10	-2.51474e-10	-6.33366e-11
		0.02474	-6.17766e-10	-2.51786e-10	-6.36486e-11
		0.02476	-6.17766e-10	-2.5241e-10	-6.30246e-11
		0.02478	-6.17454e-10	-2.52722e-10	-6.24006e-11
		0.0248	-6.16518e-10	-2.52722e-10	-6.24006e-11
		0.02482	-6.17142e-10	-2.54594e-10	-6.24006e-11
		0.02484	-6.17454e-10	-2.5553e-10	-6.17766e-11
		0.02486	-6.17766e-10	-2.56466e-10	-6.20886e-11
		0.02488	-6.1839e-10	-2.5553e-10	-6.20886e-11
		0.0249	-6.18702e-10	-2.54594e-10	-6.36486e-11
		0.02492	-6.18078e-10	-2.54282e-10	-6.33366e-11
		0.02494	-6.17454e-10	-2.54594e-10	-6.33366e-11
		0.02496	-6.18078e-10	-2.5397e-10	-6.39606e-11
		0.02498	-6.1683e-10	-2.53658e-10	-6.36486e-11
		0.025	-6.1683e-10	-2.53034e-10	-6.42726e-11
		0.02502	-6.1527e-10	-2.52098e-10	-6.48966e-11
		0.02504	-6.1527e-10	-2.50538e-10	-6.42726e-11
		0.02506	-6.1527e-10	-2.50538e-10	-6.36486e-11
		0.02508	-6.16206e-10	-2.49914e-10	-6.36486e-11
		0.0251	-6.16518e-10	-2.5085e-10	-6.30246e-11
		0.02512	-6.1683e-10	-2.5085e-10	-6.30246e-11
		0.02514	-6.17766e-10	-2.52722e-10	-6.27126e-11
		0.02516	-6.17454e-10	-2.54594e-10	-6.24006e-11
		0.02518	-6.1683e-10	-2.56778e-10	-6.17766e-11
		0.0252	-6.16206e-10	-2.55842e-10	-6.24006e-11
		0.02522	-6.16206e-10	-2.56778e-10	-6.33366e-11
		0.02524	-6.15894e-10	-2.55842e-10	-6.39606e-11
		0.02526	-6.16206e-10	-2.5553e-10	-6.52086e-11
		0.02528	-6.17142e-10	-2.55842e-10	-6.58326e-11
		0.0253	-6.17766e-10	-2.56466e-10	-6.58326e-11
		0.02532	-6.1839e-10	-2.57714e-10	-6.58326e-11
		0.02534	-6.19326e-10	-2.59586e-10	-6.48966e-11
		0.02536	-6.19638e-10	-2.60522e-10	-6.52086e-11
		0.02538	-6.19014e-10	-2.62082e-10	-6.61446e-11
		0.0254	-6.18702e-10	-2.61458e-10	-6.64566e-11
		0.02542	-6.17454e-10	-2.6021e-10	-6.73926e-11
		0.02544	-6.17142e-10	-2.5865e-10	-6.64566e-11
		0.02546	-6.17142e-10	-2.56778e-10	-6.48966e-11
		0.02548	-6.17454e-10	-2.55218e-10	-6.36486e-11
		0.0255	-6.17142e-10	-2.54594e-10	-6.24006e-11
		0.02552	-6.15894e-10	-2.54906e-10	-6.11526e-11
		0.02554	-6.15894e-10	-2.54282e-10	-6.11526e-11
		0.02556	-6.16206e-10	-2.5397e-10	-6.08406e-11
		0.02558	-6.1527e-10	-2.53346e-10	-6.11526e-11
		0.0256	-6.14646e-10	-2.52098e-10	-6.02166e-11
		0.02562	-6.16206e-10	-2.50226e-10	-6.14646e-11
		0.02564	-6.17142e-10	-2.49602e-10	-6.11526e-11
		0.02566	-6.18702e-10	-2.49914e-10	-6.20886e-11
		0.02568	-6.19326e-10	-2.50226e-10	-6.20886e-11
		0.0257	-6.19638e-10	-2.51162e-10	-6.30246e-11
		0.02572	-6.20262e-10	-2.51786e-10	-6.33366e-11
		0.02574	-6.20262e-10	-2.52722e-10	-6.30246e-11
		0.02576	-6.19638e-10	-2.53034e-10	-6.24006e-11
		0.02578	-6.19326e-10	-2.5397e-10	-6.24006e-11
		0.0258	-6.1839e-10	-2.5553e-10	-6.11526e-11
		0.02582	-6.19326e-10	-2.56466e-10	-6.14646e-11
		0.02584	-6.18702e-10	-2.57714e-10	-6.14646e-11
		0.02586	-6.1839e-10	-2.57714e-10	-6.17766e-11
		0.02588	-6.17454e-10	-2.58338e-10	-6.27126e-11
		0.0259	-6.17142e-10	-2.5865e-10	-6.33366e-11
		0.02592	-6.1683e-10	-2.58338e-10	-6.42726e-11
		0.02594	-6.17142e-10	-2.5709e-10	-6.55206e-11
		0.02596	-6.17766e-10	-2.55842e-10	-6.61446e-11
		0.02598	-6.18078e-10	-2.54906e-10	-6.58326e-11
		0.026	-6.1839e-10	-2.54594e-10	-6.48966e-11
		0.02602	-6.19326e-10	-2.54906e-10	-6.36486e-11
		0.02604	-6.18702e-10	-2.55218e-10	-6.33366e-11
		0.02606	-6.19638e-10	-2.5553e-10	-6.30246e-11
		0.02608	-6.19638e-10	-2.55842e-10	-6.24006e-11
		0.0261	-6.1839e-10	-2.55842e-10	-6.24006e-11
		0.02612	-6.17454e-10	-2.55842e-10	-6.11526e-11
		0.02614	-6.16518e-10	-2.55218e-10	-6.11526e-11
		0.02616	-6.15582e-10	-2.54282e-10	-6.08406e-11
		0.02618	-6.15582e-10	-2.53034e-10	-6.05286e-11
		0.0262	-6.15582e-10	-2.51786e-10	-6.08406e-11
		0.02622	-6.15894e-10	-2.50226e-10	-6.17766e-11
		0.02624	-6.16206e-10	-2.50538e-10	-6.24006e-11
		0.02626	-6.17142e-10	-2.51786e-10	-6.39606e-11
		0.02628	-6.18078e-10	-2.5241e-10	-6.45846e-11
		0.0263	-6.17766e-10	-2.53034e-10	-6.45846e-11
		0.02632	-6.18702e-10	-2.53034e-10	-6.39606e-11
		0.02634	-6.18702e-10	-2.52722e-10	-6.30246e-11
		0.02636	-6.18702e-10	-2.52098e-10	-6.20886e-11
		0.02638	-6.19326e-10	-2.4929e-10	-6.08406e-11
		0.0264	-6.18702e-10	-2.48042e-10	-5.99046e-11
		0.02642	-6.18702e-10	-2.47106e-10	-5.99046e-11
		0.02644	-6.19014e-10	-2.46794e-10	-6.11526e-11
		0.02646	-6.19638e-10	-2.45858e-10	-6.17766e-11
		0.02648	-6.20262e-10	-2.47418e-10	-6.14646e-11
		0.0265	-6.19638e-10	-2.48666e-10	-6.17766e-11
		0.02652	-6.20262e-10	-2.4929e-10	-6.20886e-11
		0.02654	-6.1839e-10	-2.5085e-10	-6.24006e-11
		0.02656	-6.16206e-10	-2.51474e-10	-6.27126e-11
		0.02658	-6.14646e-10	-2.52098e-10	-6.20886e-11
		0.0266	-6.12774e-10	-2.52722e-10	-6.20886e-11
		0.02662	-6.11838e-10	-2.5241e-10	-6.11526e-11
		0.02664	-6.12774e-10	-2.5241e-10	-6.11526e-11
		0.02666	-6.13086e-10	-2.52722e-10	-6.05286e-11
		0.02668	-6.14646e-10	-2.52098e-10	-6.08406e-11
		0.0267	-6.16206e-10	-2.51474e-10	-6.24006e-11
		0.02672	-6.16206e-10	-2.5085e-10	-6.24006e-11
		0.02674	-6.17142e-10	-2.50226e-10	-6.33366e-11
		0.02676	-6.16518e-10	-2.5085e-10	-6.42726e-11
		0.02678	-6.1683e-10	-2.5085e-10	-6.45846e-11
		0.0268	-6.18078e-10	-2.51786e-10	-6.45846e-11
		0.02682	-6.19014e-10	-2.5241e-10	-6.30246e-11
		0.02684	-6.20262e-10	-2.5241e-10	-6.14646e-11
		0.02686	-6.20886e-10	-2.5241e-10	-6.08406e-11
		0.02688	-6.20262e-10	-2.5241e-10	-5.95926e-11
		0.0269	-6.19326e-10	-2.51474e-10	-5.92806e-11
		0.02692	-6.18702e-10	-2.50226e-10	-5.99046e-11
		0.02694	-6.17142e-10	-2.49914e-10	-6.02166e-11
		0.02696	-6.16518e-10	-2.50226e-10	-6.14646e-11
		0.02698	-6.15582e-10	-2.50538e-10	-6.24006e-11
		0.027	-6.16206e-10	-2.4929e-10	-6.42726e-11
		0.02702	-6.15582e-10	-2.48978e-10	-6.61446e-11
		0.02704	-6.15582e-10	-2.4773e-10	-6.83286e-11
		0.02706	-6.16206e-10	-2.47106e-10	-6.80166e-11
		0.02708	-6.15894e-10	-2.46794e-10	-6.77046e-11
		0.0271	-6.16518e-10	-2.47106e-10	-6.67686e-11
		0.02712	-6.17142e-10	-2.48666e-10	-6.55206e-11
		0.02714	-6.17766e-10	-2.50538e-10	-6.36486e-11
		0.02716	-6.18078e-10	-2.5241e-10	-6.14646e-11
		0.02718	-6.18702e-10	-2.54594e-10	-6.05286e-11
		0.0272	-6.19638e-10	-2.56466e-10	-5.95926e-11
		0.02722	-6.19014e-10	-2.57402e-10	-5.95926e-11
		0.02724	-6.19014e-10	-2.56778e-10	-6.08406e-11
		0.02726	-6.1839e-10	-2.5709e-10	-6.17766e-11
		0.02728	-6.17454e-10	-2.54282e-10	-6.36486e-11
		0.0273	-6.16518e-10	-2.51474e-10	-6.36486e-11
		0.02732	-6.15894e-10	-2.48666e-10	-6.36486e-11
		0.02734	-6.15894e-10	-2.46482e-10	-6.39606e-11
		0.02736	-6.16518e-10	-2.45546e-10	-6.39606e-11
		0.02738	-6.17454e-10	-2.45546e-10	-6.39606e-11
		0.0274	-6.16206e-10	-2.46794e-10	-6.30246e-11
		0.02742	-6.1527e-10	-2.4773e-10	-6.33366e-11
		0.02744	-6.14646e-10	-2.4929e-10	-6.30246e-11
		0.02746	-6.14022e-10	-2.51162e-10	-6.24006e-11
		0.02748	-6.14334e-10	-2.52722e-10	-6.17766e-11
		0.0275	-6.14646e-10	-2.53658e-10	-6.14646e-11
		0.02752	-6.14334e-10	-2.5397e-10	-6.24006e-11
		0.02754	-6.14646e-10	-2.53034e-10	-6.27126e-11
		0.02756	-6.1371e-10	-2.50538e-10	-6.20886e-11
		0.02758	-6.13086e-10	-2.48354e-10	-6.20886e-11
		0.0276	-6.1371e-10	-2.45858e-10	-6.17766e-11
		0.02762	-6.14022e-10	-2.45546e-10	-6.08406e-11
		0.02764	-6.1527e-10	-2.45858e-10	-5.95926e-11
		0.02766	-6.16518e-10	-2.4773e-10	-5.95926e-11
		0.02768	-6.18702e-10	-2.49602e-10	-6.02166e-11
		0.0277	-6.19638e-10	-2.51162e-10	-6.02166e-11
		0.02772	-6.20262e-10	-2.5241e-10	-6.11526e-11
		0.02774	-6.19638e-10	-2.52722e-10	-6.17766e-11
		0.02776	-6.20574e-10	-2.5241e-10	-6.24006e-11
		0.02778	-6.1995e-10	-2.51474e-10	-6.27126e-11
		0.0278	-6.19014e-10	-2.49914e-10	-6.27126e-11
		0.02782	-6.19014e-10	-2.48978e-10	-6.27126e-11
		0.02784	-6.20574e-10	-2.49602e-10	-6.33366e-11
		0.02786	-6.21198e-10	-2.49914e-10	-6.27126e-11
		0.02788	-6.20574e-10	-2.50538e-10	-6.24006e-11
		0.0279	-6.20262e-10	-2.51162e-10	-6.17766e-11
		0.02792	-6.19014e-10	-2.5085e-10	-6.05286e-11
		0.02794	-6.17454e-10	-2.50538e-10	-5.99046e-11
		0.02796	-6.16206e-10	-2.49914e-10	-5.92806e-11
		0.02798	-6.16518e-10	-2.48666e-10	-5.83445e-11
		0.028	-6.1683e-10	-2.49602e-10	-5.83445e-11
		0.02802	-6.16206e-10	-2.49914e-10	-5.89686e-11
		0.02804	-6.14646e-10	-2.4773e-10	-5.89686e-11
		0.02806	-6.15582e-10	-2.48978e-10	-5.86565e-11
		0.02808	-6.15582e-10	-2.48978e-10	-5.99046e-11
		0.0281	-6.15894e-10	-2.50226e-10	-6.05286e-11
		0.02812	-6.16518e-10	-2.52098e-10	-6.02166e-11
		0.02814	-6.17766e-10	-2.53034e-10	-5.99046e-11
		0.02816	-6.19638e-10	-2.51474e-10	-6.08406e-11
		0.02818	-6.20886e-10	-2.50538e-10	-6.11526e-11
		0.0282	-6.2307e-10	-2.47106e-10	-6.24006e-11
		0.02822	-6.22758e-10	-2.43986e-10	-6.39606e-11
		0.02824	-6.22446e-10	-2.42114e-10	-6.45846e-11
		0.02826	-6.21198e-10	-2.40866e-10	-6.39606e-11
		0.02828	-6.1995e-10	-2.42114e-10	-6.33366e-11
		0.0283	-6.18078e-10	-2.44298e-10	-6.17766e-11
		0.02832	-6.17766e-10	-2.44922e-10	-6.02166e-11
		0.02834	-6.16518e-10	-2.4617e-10	-5.99046e-11
		0.02836	-6.15894e-10	-2.47106e-10	-6.02166e-11
		0.02838	-6.16206e-10	-2.47418e-10	-6.02166e-11
		0.0284	-6.1683e-10	-2.4773e-10	-6.08406e-11
		0.02842	-6.17766e-10	-2.48042e-10	-6.14646e-11
		0.02844	-6.1839e-10	-2.48978e-10	-6.11526e-11
		0.02846	-6.20262e-10	-2.4929e-10	-6.08406e-11
		0.02848	-6.22446e-10	-2.48978e-10	-6.08406e-11
		0.0285	-6.2307e-10	-2.48666e-10	-6.11526e-11
		0.02852	-6.23382e-10	-2.49602e-10	-6.24006e-11
		0.02854	-6.24006e-10	-2.49602e-10	-6.39606e-11
		0.02856	-6.23382e-10	-2.48978e-10	-6.48966e-11
		0.02858	-6.21822e-10	-2.49602e-10	-6.48966e-11
		0.0286	-6.20262e-10	-2.50538e-10	-6.55206e-11
		0.02862	-6.1995e-10	-2.52098e-10	-6.48966e-11
		0.02864	-6.18078e-10	-2.53346e-10	-6.52086e-11
		0.02866	-6.1683e-10	-2.5553e-10	-6.39606e-11
		0.02868	-6.16518e-10	-2.56466e-10	-6.33366e-11
		0.0287	-6.1683e-10	-2.56154e-10	-6.27126e-11
		0.02872	-6.16518e-10	-2.56466e-10	-6.36486e-11
		0.02874	-6.16206e-10	-2.55218e-10	-6.39606e-11
		0.02876	-6.16206e-10	-2.53658e-10	-6.33366e-11
		0.02878	-6.1527e-10	-2.51786e-10	-6.27126e-11
		0.0288	-6.16518e-10	-2.52098e-10	-6.14646e-11
		0.02882	-6.17142e-10	-2.5241e-10	-6.02166e-11
		0.02884	-6.17454e-10	-2.52722e-10	-5.95926e-11
		0.02886	-6.18078e-10	-2.54282e-10	-5.89686e-11
		0.02888	-6.18702e-10	-2.54906e-10	-5.92806e-11
		0.0289	-6.17766e-10	-2.5397e-10	-5.95926e-11
		0.02892	-6.18702e-10	-2.53346e-10	-6.05286e-11
		0.02894	-6.1839e-10	-2.53346e-10	-6.02166e-11
		0.02896	-6.17454e-10	-2.53034e-10	-5.99046e-11
		0.02898	-6.18078e-10	-2.5241e-10	-6.05286e-11
		0.029	-6.1683e-10	-2.51162e-10	-5.92806e-11
		0.02902	-6.17142e-10	-2.48978e-10	-5.95926e-11
		0.02904	-6.17766e-10	-2.46794e-10	-6.08406e-11
		0.02906	-6.1683e-10	-2.45546e-10	-6.11526e-11
		0.02908	-6.16206e-10	-2.45234e-10	-6.27126e-11
		0.0291	-6.1683e-10	-2.46794e-10	-6.30246e-11
		0.02912	-6.17142e-10	-2.4773e-10	-6.30246e-11
		0.02914	-6.18078e-10	-2.48666e-10	-6.14646e-11
		0.02916	-6.18702e-10	-2.50538e-10	-6.02166e-11
		0.02918	-6.19638e-10	-2.5085e-10	-5.89686e-11
		0.0292	-6.21822e-10	-2.51162e-10	-5.95926e-11
		0.02922	-6.23382e-10	-2.51786e-10	-6.02166e-11
		0.02924	-6.23382e-10	-2.51786e-10	-6.20886e-11
		0.02926	-6.22446e-10	-2.50538e-10	-6.36486e-11
		0.02928	-6.21822e-10	-2.5085e-10	-6.45846e-11
		0.0293	-6.20262e-10	-2.51786e-10	-6.55206e-11
		0.02932	-6.20574e-10	-2.53034e-10	-6.70806e-11
		0.02934	-6.19638e-10	-2.54594e-10	-6.64566e-11
		0.02936	-6.19638e-10	-2.55842e-10	-6.55206e-11
		0.02938	-6.19638e-10	-2.55842e-10	-6.48966e-11
		0.0294	-6.19014e-10	-2.54282e-10	-6.42726e-11
		0.02942	-6.19326e-10	-2.5397e-10	-6.45846e-11
		0.02944	-6.19638e-10	-2.53658e-10	-6.33366e-11
		0.02946	-6.20262e-10	-2.5241e-10	-6.08406e-11
		0.02948	-6.21198e-10	-2.51474e-10	-5.92806e-11
		0.0295	-6.20886e-10	-2.50538e-10	-5.92806e-11
		0.02952	-6.20574e-10	-2.49602e-10	-5.83445e-11
		0.02954	-6.19014e-10	-2.48978e-10	-5.86565e-11
		0.02956	-6.18702e-10	-2.4929e-10	-5.89686e-11
		0.02958	-6.17766e-10	-2.48978e-10	-5.99046e-11
		0.0296	-6.17454e-10	-2.50226e-10	-6.05286e-11
		0.02962	-6.17142e-10	-2.5085e-10	-6.11526e-11
		0.02964	-6.17766e-10	-2.50226e-10	-6.24006e-11
		0.02966	-6.19638e-10	-2.50538e-10	-6.36486e-11
		0.02968	-6.1995e-10	-2.4929e-10	-6.27126e-11
		0.0297	-6.19638e-10	-2.48042e-10	-6.33366e-11
		0.02972	-6.19326e-10	-2.4773e-10	-6.27126e-11
		0.02974	-6.19638e-10	-2.46794e-10	-6.24006e-11
		0.02976	-6.18702e-10	-2.45858e-10	-6.11526e-11
		0.02978	-6.17766e-10	-2.45234e-10	-5.86565e-11
		0.0298	-6.1683e-10	-2.45234e-10	-5.86565e-11
		0.02982	-6.16206e-10	-2.45234e-10	-5.86565e-11
		0.02984	-6.16206e-10	-2.47106e-10	-5.92806e-11
		0.02986	-6.14646e-10	-2.48354e-10	-6.05286e-11
		0.02988	-6.15894e-10	-2.48354e-10	-6.24006e-11
		0.0299	-6.1527e-10	-2.48666e-10	-6.42726e-11
		0.02992	-6.1527e-10	-2.47418e-10	-6.67686e-11
		0.02994	-6.15894e-10	-2.47106e-10	-6.73926e-11
		0.02996	-6.15894e-10	-2.47106e-10	-6.52086e-11
		0.02998	-6.17142e-10	-2.45546e-10	-6.36486e-11
		0.03	-6.1839e-10	-2.43674e-10	-6.20886e-11
		0.03002	-6.19014e-10	-2.4305e-10	-6.08406e-11
		0.03004	-6.19014e-10	-2.4149e-10	-6.08406e-11
		0.03006	-6.19638e-10	-2.40866e-10	-6.20886e-11
		0.03008	-6.1995e-10	-2.42114e-10	-6.30246e-11
		0.0301	-6.18702e-10	-2.43674e-10	-6.27126e-11
		0.03012	-6.18078e-10	-2.45858e-10	-6.17766e-11
		0.03014	-6.18078e-10	-2.48354e-10	-6.11526e-11
		0.03016	-6.17454e-10	-2.50226e-10	-6.20886e-11
		0.03018	-6.17454e-10	-2.51474e-10	-6.27126e-11
		0.0302	-6.17142e-10	-2.51162e-10	-6.33366e-11
		0.03022	-6.17142e-10	-2.50538e-10	-6.45846e-11
		0.03024	-6.17142e-10	-2.49914e-10	-6.58326e-11
		0.03026	-6.17766e-10	-2.48978e-10	-6.58326e-11
		0.03028	-6.1839e-10	-2.4929e-10	-6.48966e-11
		0.0303	-6.1839e-10	-2.50226e-10	-6.36486e-11
		0.03032	-6.19326e-10	-2.51474e-10	-6.27126e-11
		0.03034	-6.1839e-10	-2.5241e-10	-6.14646e-11
		0.03036	-6.18702e-10	-2.53658e-10	-5.95926e-11
		0.03038	-6.18078e-10	-2.53034e-10	-5.99046e-11
		0.0304	-6.17766e-10	-2.50538e-10	-5.99046e-11
		0.03042	-6.17454e-10	-2.4929e-10	-5.99046e-11
		0.03044	-6.17454e-10	-2.48666e-10	-6.02166e-11
		0.03046	-6.17142e-10	-2.48042e-10	-5.89686e-11
		0.03048	-6.18702e-10	-2.48666e-10	-5.89686e-11
		0.0305	-6.18702e-10	-2.50226e-10	-6.05286e-11
		0.03052	-6.21198e-10	-2.50226e-10	-6.11526e-11
		0.03054	-6.2151e-10	-2.49914e-10	-6.14646e-11
		0.03056	-6.2151e-10	-2.49914e-10	-6.24006e-11
		0.03058	-6.20262e-10	-2.49914e-10	-6.24006e-11
		0.0306	-6.18702e-10	-2.5085e-10	-6.20886e-11
		0.03062	-6.1839e-10	-2.51162e-10	-6.05286e-11
		0.03064	-6.17766e-10	-2.5241e-10	-5.95926e-11
		0.03066	-6.17766e-10	-2.52098e-10	-5.89686e-11
		0.03068	-6.18078e-10	-2.52098e-10	-5.83445e-11
		0.0307	-6.17454e-10	-2.51786e-10	-5.83445e-11
		0.03072	-6.17454e-10	-2.50538e-10	-5.95926e-11
		0.03074	-6.1683e-10	-2.4929e-10	-5.89686e-11
		0.03076	-6.16518e-10	-2.4773e-10	-5.83445e-11
		0.03078	-6.17142e-10	-2.46794e-10	-5.80325e-11
		0.0308	-6.17142e-10	-2.48042e-10	-5.80325e-11
		0.03082	-6.18078e-10	-2.49914e-10	-5.86565e-11
		0.03084	-6.19014e-10	-2.5085e-10	-6.02166e-11
		0.03086	-6.19638e-10	-2.5241e-10	-6.27126e-11
		0.03088	-6.19326e-10	-2.5241e-10	-6.48966e-11
		0.0309	-6.1839e-10	-2.52722e-10	-6.61446e-11
		0.03092	-6.17454e-10	-2.53346e-10	-6.73926e-11
		0.03094	-6.1683e-10	-2.54906e-10	-6.67686e-11
		0.03096	-6.17142e-10	-2.55218e-10	-6.55206e-11
		0.03098	-6.17766e-10	-2.56778e-10	-6.42726e-11
		0.031	-6.19326e-10	-2.5709e-10	-6.33366e-11
		0.03102	-6.1995e-10	-2.57714e-10	-6.24006e-11
		0.03104	-6.20262e-10	-2.56466e-10	-6.33366e-11
		0.03106	-6.20262e-10	-2.54906e-10	-6.45846e-11
		0.03108	-6.20574e-10	-2.5241e-10	-6.45846e-11
		0.0311	-6.19638e-10	-2.5085e-10	-6.39606e-11
		0.03112	-6.19638e-10	-2.48666e-10	-6.27126e-11
		0.03114	-6.19638e-10	-2.48042e-10	-6.11526e-11
		0.03116	-6.1995e-10	-2.48978e-10	-6.02166e-11
		0.03118	-6.19014e-10	-2.48354e-10	-6.02166e-11
		0.0312	-6.18702e-10	-2.4929e-10	-6.08406e-11
		0.03122	-6.19014e-10	-2.48666e-10	-6.24006e-11
		0.03124	-6.18702e-10	-2.48042e-10	-6.30246e-11
		0.03126	-6.19014e-10	-2.4773e-10	-6.33366e-11
		0.03128	-6.17766e-10	-2.47418e-10	-6.33366e-11
		0.0313	-6.17766e-10	-2.46794e-10	-6.27126e-11
		0.03132	-6.18078e-10	-2.4773e-10	-6.27126e-11
		0.03134	-6.18078e-10	-2.4773e-10	-6.27126e-11
		0.03136	-6.18702e-10	-2.48354e-10	-6.20886e-11
		0.03138	-6.19326e-10	-2.50538e-10	-6.20886e-11
		0.0314	-6.18702e-10	-2.51162e-10	-6.11526e-11
		0.03142	-6.19014e-10	-2.52722e-10	-6.14646e-11
		0.03144	-6.19014e-10	-2.5397e-10	-6.14646e-11
		0.03146	-6.20886e-10	-2.55218e-10	-6.11526e-11
		0.03148	-6.20886e-10	-2.56778e-10	-6.11526e-11
		0.0315	-6.22446e-10	-2.55842e-10	-6.11526e-11
		0.03152	-6.22134e-10	-2.54906e-10	-6.20886e-11
		0.03154	-6.21822e-10	-2.52098e-10	-6.33366e-11
		0.03156	-6.20886e-10	-2.51162e-10	-6.42726e-11
		0.03158	-6.19326e-10	-2.49914e-10	-6.33366e-11
		0.0316	-6.17766e-10	-2.48354e-10	-6.33366e-11
		0.03162	-6.16518e-10	-2.48666e-10	-6.30246e-11
		0.03164	-6.1527e-10	-2.48666e-10	-6.33366e-11
		0.03166	-6.16206e-10	-2.48042e-10	-6.39606e-11
		0.03168	-6.16518e-10	-2.49602e-10	-6.45846e-11
		0.0317	-6.17142e-10	-2.48978e-10	-6.52086e-11
		0.03172	-6.18078e-10	-2.48666e-10	-6.58326e-11
		0.03174	-6.1839e-10	-2.48978e-10	-6.67686e-11
		0.03176	-6.18078e-10	-2.4929e-10	-6.67686e-11
		0.03178	-6.18078e-10	-2.4929e-10	-6.58326e-11
		0.0318	-6.19014e-10	-2.49602e-10	-6.52086e-11
		0.03182	-6.20886e-10	-2.5085e-10	-6.45846e-11
		0.03184	-6.22134e-10	-2.52098e-10	-6.52086e-11
		0.03186	-6.22446e-10	-2.52098e-10	-6.58326e-11
		0.03188	-6.22758e-10	-2.50538e-10	-6.61446e-11
		0.0319	-6.22758e-10	-2.48666e-10	-6.61446e-11
		0.03192	-6.22758e-10	-2.46482e-10	-6.73926e-11
		0.03194	-6.21822e-10	-2.45546e-10	-6.70806e-11
		0.03196	-6.21198e-10	-2.45858e-10	-6.58326e-11
		0.03198	-6.19326e-10	-2.46482e-10	-6.55206e-11
		0.032	-6.18078e-10	-2.47106e-10	-6.39606e-11
		0.03202	-6.17142e-10	-2.4773e-10	-6.20886e-11
		0.03204	-6.1683e-10	-2.47106e-10	-6.11526e-11
		0.03206	-6.17142e-10	-2.46794e-10	-6.02166e-11
		0.03208	-6.17766e-10	-2.45858e-10	-5.86565e-11
		0.0321	-6.18078e-10	-2.46482e-10	-5.95926e-11
		0.03212	-6.18702e-10	-2.47106e-10	-5.99046e-11
		0.03214	-6.19014e-10	-2.49602e-10	-6.08406e-11
		0.03216	-6.19638e-10	-2.51474e-10	-6.14646e-11
		0.03218	-6.21198e-10	-2.51786e-10	-6.24006e-11
		0.0322	-6.20262e-10	-2.51162e-10	-6.30246e-11
		0.03222	-6.19326e-10	-2.51474e-10	-6.42726e-11
		0.03224	-6.1839e-10	-2.49914e-10	-6.52086e-11
		0.03226	-6.18078e-10	-2.48666e-10	-6.42726e-11
		0.03228	-6.1839e-10	-2.47106e-10	-6.48966e-11
		0.0323	-6.18078e-10	-2.45858e-10	-6.45846e-11
		0.03232	-6.18702e-10	-2.44922e-10	-6.30246e-11
		0.03234	-6.18078e-10	-2.4461e-10	-6.33366e-11
		0.03236	-6.1839e-10	-2.43986e-10	-6.36486e-11
		0.03238	-6.17454e-10	-2.4305e-10	-6.36486e-11
		0.0324	-6.16518e-10	-2.44298e-10	-6.36486e-11
		0.03242	-6.1683e-10	-2.45546e-10	-6.36486e-11
		0.03244	-6.1683e-10	-2.48354e-10	-6.36486e-11
		0.03246	-6.17454e-10	-2.5085e-10	-6.36486e-11
		0.03248	-6.18078e-10	-2.5397e-10	-6.39606e-11
		0.0325	-6.17766e-10	-2.55842e-10	-6.42726e-11
		0.03252	-6.1839e-10	-2.5553e-10	-6.48966e-11
		0.03254	-6.17454e-10	-2.54594e-10	-6.52086e-11
		0.03256	-6.17454e-10	-2.52722e-10	-6.45846e-11
		0.03258	-6.17142e-10	-2.51474e-10	-6.39606e-11
		0.0326	-6.17454e-10	-2.51162e-10	-6.39606e-11
		0.03262	-6.1683e-10	-2.5241e-10	-6.27126e-11
		0.03264	-6.1839e-10	-2.54594e-10	-6.14646e-11
		0.03266	-6.1839e-10	-2.5709e-10	-6.02166e-11
		0.03268	-6.18078e-10	-2.59274e-10	-6.14646e-11
		0.0327	-6.18078e-10	-2.58338e-10	-6.20886e-11
		0.03272	-6.18078e-10	-2.58026e-10	-6.36486e-11
		0.03274	-6.17766e-10	-2.5553e-10	-6.52086e-11
		0.03276	-6.17454e-10	-2.53658e-10	-6.52086e-11
		0.03278	-6.18078e-10	-2.52722e-10	-6.45846e-11
		0.0328	-6.1839e-10	-2.51786e-10	-6.30246e-11
		0.03282	-6.1839e-10	-2.51474e-10	-6.27126e-11
		0.03284	-6.19326e-10	-2.52098e-10	-6.08406e-11
		0.03286	-6.19326e-10	-2.52098e-10	-6.24006e-11
		0.03288	-6.19326e-10	-2.53346e-10	-6.27126e-11
		0.0329	-6.18078e-10	-2.53658e-10	-6.33366e-11
		0.03292	-6.17454e-10	-2.5397e-10	-6.48966e-11
		0.03294	-6.16206e-10	-2.53034e-10	-6.48966e-11
		0.03296	-6.17142e-10	-2.53034e-10	-6.58326e-11
		0.03298	-6.1683e-10	-2.5241e-10	-6.48966e-11
		0.033	-6.17766e-10	-2.53658e-10	-6.42726e-11
		0.03302	-6.17766e-10	-2.54282e-10	-6.42726e-11
		0.03304	-6.17454e-10	-2.54282e-10	-6.45846e-11
		0.03306	-6.17142e-10	-2.54282e-10	-6.39606e-11
		0.03308	-6.17142e-10	-2.5397e-10	-6.48966e-11
		0.0331	-6.17142e-10	-2.5397e-10	-6.45846e-11
		0.03312	-6.18078e-10	-2.53658e-10	-6.42726e-11
		0.03314	-6.17454e-10	-2.53658e-10	-6.42726e-11
		0.03316	-6.19014e-10	-2.53346e-10	-6.48966e-11
		0.03318	-6.19638e-10	-2.54282e-10	-6.48966e-11
		0.0332	-6.20886e-10	-2.5397e-10	-6.61446e-11
		0.03322	-6.22446e-10	-2.55842e-10	-6.70806e-11
		0.03324	-6.22134e-10	-2.5709e-10	-6.67686e-11
		0.03326	-6.21198e-10	-2.58026e-10	-6.55206e-11
		0.03328	-6.20262e-10	-2.5865e-10	-6.48966e-11
		0.0333	-6.19326e-10	-2.58338e-10	-6.48966e-11
		0.03332	-6.18078e-10	-2.59586e-10	-6.30246e-11
		0.03334	-6.16518e-10	-2.59274e-10	-6.30246e-11
		0.03336	-6.15582e-10	-2.59586e-10	-6.24006e-11
		0.03338	-6.14958e-10	-2.59274e-10	-6.27126e-11
		0.0334	-6.14646e-10	-2.58962e-10	-6.33366e-11
		0.03342	-6.14646e-10	-2.57714e-10	-6.24006e-11
		0.03344	-6.15894e-10	-2.57402e-10	-6.36486e-11
		0.03346	-6.1683e-10	-2.57714e-10	-6.33366e-11
		0.03348	-6.17766e-10	-2.58962e-10	-6.30246e-11
		0.0335	-6.19014e-10	-2.5865e-10	-6.30246e-11
		0.03352	-6.19326e-10	-2.57714e-10	-6.39606e-11
		0.03354	-6.20886e-10	-2.57402e-10	-6.45846e-11
		0.03356	-6.20886e-10	-2.57714e-10	-6.39606e-11
		0.03358	-6.20262e-10	-2.5709e-10	-6.27126e-11
		0.0336	-6.19326e-10	-2.5553e-10	-6.24006e-11
		0.03362	-6.18702e-10	-2.54282e-10	-6.14646e-11
		0.03364	-6.19326e-10	-2.53034e-10	-6.14646e-11
		0.03366	-6.19638e-10	-2.53034e-10	-6.11526e-11
		0.03368	-6.19326e-10	-2.53658e-10	-6.11526e-11
		0.0337	-6.19638e-10	-2.54594e-10	-6.24006e-11
		0.03372	-6.19326e-10	-2.55218e-10	-6.11526e-11
		0.03374	-6.1839e-10	-2.54594e-10	-6.17766e-11
		0.03376	-6.19014e-10	-2.54594e-10	-6.20886e-11
		0.03378	-6.19014e-10	-2.54594e-10	-6.24006e-11
		0.0338	-6.19638e-10	-2.55218e-10	-6.30246e-11
		0.03382	-6.20262e-10	-2.54906e-10	-6.36486e-11
		0.03384	-6.21198e-10	-2.56154e-10	-6.42726e-11
		0.03386	-6.21198e-10	-2.55842e-10	-6.48966e-11
		0.03388	-6.22134e-10	-2.55842e-10	-6.45846e-11
		0.0339	-6.21822e-10	-2.57402e-10	-6.52086e-11
		0.03392	-6.22134e-10	-2.58338e-10	-6.55206e-11
		0.03394	-6.21822e-10	-2.6021e-10	-6.48966e-11
		0.03396	-6.21822e-10	-2.59898e-10	-6.48966e-11
		0.03398	-6.21822e-10	-2.6021e-10	-6.42726e-11
		0.034	-6.22758e-10	-2.58338e-10	-6.45846e-11
		0.03402	-6.22758e-10	-2.5553e-10	-6.48966e-11
		0.03404	-6.21198e-10	-2.54282e-10	-6.52086e-11
		0.03406	-6.21198e-10	-2.53034e-10	-6.48966e-11
		0.03408	-6.19326e-10	-2.51162e-10	-6.48966e-11
		0.0341	-6.19014e-10	-2.50226e-10	-6.33366e-11
		0.03412	-6.19326e-10	-2.51786e-10	-6.14646e-11
		0.03414	-6.20262e-10	-2.51474e-10	-5.89686e-11
		0.03416	-6.20262e-10	-2.53346e-10	-5.74085e-11
		0.03418	-6.20262e-10	-2.54906e-10	-5.70965e-11
		0.0342	-6.20886e-10	-2.56466e-10	-5.70965e-11
		0.03422	-6.2151e-10	-2.58026e-10	-5.77205e-11
		0.03424	-6.2151e-10	-2.59586e-10	-5.89686e-11
		0.03426	-6.20886e-10	-2.61146e-10	-5.99046e-11
		0.03428	-6.20262e-10	-2.6177e-10	-6.02166e-11
		0.0343	-6.20262e-10	-2.61146e-10	-6.02166e-11
		0.03432	-6.20574e-10	-2.59586e-10	-5.99046e-11
		0.03434	-6.1995e-10	-2.58338e-10	-5.95926e-11
		0.03436	-6.20886e-10	-2.56778e-10	-5.95926e-11
		0.03438	-6.2151e-10	-2.5397e-10	-6.05286e-11
		0.0344	-6.2151e-10	-2.51474e-10	-6.05286e-11
		0.03442	-6.22134e-10	-2.49914e-10	-6.27126e-11
		0.03444	-6.22446e-10	-2.50226e-10	-6.27126e-11
		0.03446	-6.23382e-10	-2.51786e-10	-6.39606e-11
		0.03448	-6.24318e-10	-2.55218e-10	-6.30246e-11
		0.0345	-6.2463e-10	-2.57714e-10	-6.33366e-11
		0.03452	-6.24006e-10	-2.58338e-10	-6.24006e-11
		0.03454	-6.22446e-10	-2.58338e-10	-6.33366e-11
		0.03456	-6.2151e-10	-2.58338e-10	-6.30246e-11
		0.03458	-6.19638e-10	-2.56154e-10	-6.27126e-11
		0.0346	-6.18078e-10	-2.5397e-10	-6.27126e-11
		0.03462	-6.17766e-10	-2.52722e-10	-6.14646e-11
		0.03464	-6.1839e-10	-2.51474e-10	-6.05286e-11
		0.03466	-6.19014e-10	-2.51474e-10	-5.95926e-11
		0.03468	-6.19638e-10	-2.52098e-10	-6.08406e-11
		0.0347	-6.20574e-10	-2.53034e-10	-6.24006e-11
		0.03472	-6.20262e-10	-2.53346e-10	-6.30246e-11
		0.03474	-6.20574e-10	-2.5397e-10	-6.36486e-11
		0.03476	-6.19638e-10	-2.54282e-10	-6.45846e-11
		0.03478	-6.18702e-10	-2.55218e-10	-6.30246e-11
		0.0348	-6.18078e-10	-2.55842e-10	-6.14646e-11
		0.03482	-6.17766e-10	-2.56778e-10	-6.08406e-11
		0.03484	-6.17142e-10	-2.5709e-10	-5.99046e-11
		0.03486	-6.1683e-10	-2.5709e-10	-6.02166e-11
		0.03488	-6.1683e-10	-2.55842e-10	-6.08406e-11
		0.0349	-6.17766e-10	-2.54282e-10	-6.11526e-11
		0.03492	-6.1839e-10	-2.53034e-10	-6.17766e-11
		0.03494	-6.19326e-10	-2.52098e-10	-6.30246e-11
		0.03496	-6.21198e-10	-2.52722e-10	-6.27126e-11
		0.03498	-6.2151e-10	-2.53034e-10	-6.20886e-11
		0.035	-6.2307e-10	-2.53034e-10	-6.30246e-11
		0.03502	-6.22446e-10	-2.53346e-10	-6.36486e-11
		0.03504	-6.21822e-10	-2.5397e-10	-6.39606e-11
		0.03506	-6.20262e-10	-2.5397e-10	-6.48966e-11
		0.03508	-6.19326e-10	-2.54282e-10	-6.64566e-11
		0.0351	-6.19326e-10	-2.5553e-10	-6.58326e-11
		0.03512	-6.19014e-10	-2.5709e-10	-6.55206e-11
		0.03514	-6.20262e-10	-2.58962e-10	-6.36486e-11
		0.03516	-6.21198e-10	-2.59898e-10	-6.27126e-11
		0.03518	-6.21822e-10	-2.59898e-10	-6.24006e-11
		0.0352	-6.22758e-10	-2.59586e-10	-6.30246e-11
		0.03522	-6.2307e-10	-2.58962e-10	-6.36486e-11
		0.03524	-6.2307e-10	-2.5709e-10	-6.45846e-11
		0.03526	-6.22758e-10	-2.56778e-10	-6.55206e-11
		0.03528	-6.22134e-10	-2.56778e-10	-6.48966e-11
		0.0353	-6.2151e-10	-2.58026e-10	-6.36486e-11
		0.03532	-6.21198e-10	-2.58962e-10	-6.24006e-11
		0.03534	-6.20886e-10	-2.6021e-10	-6.24006e-11
		0.03536	-6.21822e-10	-2.59898e-10	-6.14646e-11
		0.03538	-6.21198e-10	-2.58026e-10	-6.27126e-11
		0.0354	-6.2151e-10	-2.56154e-10	-6.27126e-11
		0.03542	-6.21822e-10	-2.5397e-10	-6.24006e-11
		0.03544	-6.24006e-10	-2.53034e-10	-6.20886e-11
		0.03546	-6.23694e-10	-2.53034e-10	-6.11526e-11
		0.03548	-6.23382e-10	-2.54906e-10	-6.08406e-11
		0.0355	-6.23382e-10	-2.57714e-10	-6.08406e-11
		0.03552	-6.23382e-10	-2.5865e-10	-6.24006e-11
		0.03554	-6.22446e-10	-2.59898e-10	-6.33366e-11
		0.03556	-6.21822e-10	-2.60834e-10	-6.48966e-11
		0.03558	-6.21198e-10	-2.59898e-10	-6.64566e-11
		0.0356	-6.20574e-10	-2.58338e-10	-6.73926e-11
		0.03562	-6.1995e-10	-2.56466e-10	-6.70806e-11
		0.03564	-6.20262e-10	-2.54906e-10	-6.64566e-11
		0.03566	-6.21198e-10	-2.54282e-10	-6.55206e-11
		0.03568	-6.2151e-10	-2.54594e-10	-6.48966e-11
		0.0357	-6.22134e-10	-2.54594e-10	-6.45846e-11
		0.03572	-6.21822e-10	-2.5553e-10	-6.42726e-11
		0.03574	-6.2151e-10	-2.54906e-10	-6.42726e-11
		0.03576	-6.21198e-10	-2.54594e-10	-6.33366e-11
		0.03578	-6.20262e-10	-2.5553e-10	-6.30246e-11
		0.0358	-6.1995e-10	-2.56466e-10	-6.20886e-11
		0.03582	-6.21822e-10	-2.58338e-10	-6.20886e-11
		0.03584	-6.21822e-10	-2.61146e-10	-6.30246e-11
		0.03586	-6.22446e-10	-2.63642e-10	-6.30246e-11
		0.03588	-6.21822e-10	-2.64578e-10	-6.33366e-11
		0.0359	-6.20574e-10	-2.64266e-10	-6.36486e-11
		0.03592	-6.18702e-10	-2.63018e-10	-6.36486e-11
		0.03594	-6.1839e-10	-2.61146e-10	-6.30246e-11
		0.03596	-6.17766e-10	-2.6021e-10	-6.39606e-11
		0.03598	-6.19326e-10	-2.59898e-10	-6.39606e-11
		0.036	-6.1995e-10	-2.59898e-10	-6.36486e-11
		0.03602	-6.20886e-10	-2.59274e-10	-6.52086e-11
		0.03604	-6.20574e-10	-2.57714e-10	-6.48966e-11
		0.03606	-6.1995e-10	-2.56154e-10	-6.55206e-11
		0.03608	-6.19014e-10	-2.55218e-10	-6.58326e-11
		0.0361	-6.1839e-10	-2.54594e-10	-6.52086e-11
		0.03612	-6.1839e-10	-2.53658e-10	-6.45846e-11
		0.03614	-6.19014e-10	-2.53346e-10	-6.48966e-11
		0.03616	-6.19014e-10	-2.53658e-10	-6.39606e-11
		0.03618	-6.19326e-10	-2.54906e-10	-6.36486e-11
		0.0362	-6.19638e-10	-2.5553e-10	-6.33366e-11
		0.03622	-6.1995e-10	-2.55218e-10	-6.30246e-11
		0.03624	-6.20886e-10	-2.56154e-10	-6.33366e-11
		0.03626	-6.21198e-10	-2.56466e-10	-6.27126e-11
		0.03628	-6.2151e-10	-2.5709e-10	-6.27126e-11
		0.0363	-6.2151e-10	-2.57714e-10	-6.33366e-11
		0.03632	-6.2307e-10	-2.58962e-10	-6.36486e-11
		0.03634	-6.24318e-10	-2.60522e-10	-6.58326e-11
		0.03636	-6.24942e-10	-2.61458e-10	-6.70806e-11
		0.03638	-6.24942e-10	-2.60834e-10	-6.80166e-11
		0.0364	-6.2307e-10	-2.59274e-10	-6.95766e-11
		0.03642	-6.22758e-10	-2.58026e-10	-6.92646e-11
		0.03644	-6.21822e-10	-2.56466e-10	-6.80166e-11
		0.03646	-6.20886e-10	-2.55842e-10	-6.61446e-11
		0.03648	-6.20886e-10	-2.5553e-10	-6.48966e-11
		0.0365	-6.20574e-10	-2.56778e-10	-6.45846e-11
		0.03652	-6.20574e-10	-2.58026e-10	-6.39606e-11
		0.03654	-6.19638e-10	-2.5865e-10	-6.42726e-11
		0.03656	-6.19326e-10	-2.58962e-10	-6.48966e-11
		0.03658	-6.1839e-10	-2.58338e-10	-6.45846e-11
		0.0366	-6.17766e-10	-2.59898e-10	-6.48966e-11
		0.03662	-6.17766e-10	-2.6021e-10	-6.36486e-11
		0.03664	-6.17766e-10	-2.60522e-10	-6.24006e-11
		0.03666	-6.18702e-10	-2.6021e-10	-6.02166e-11
		0.03668	-6.20574e-10	-2.6021e-10	-5.92806e-11
		0.0367	-6.21198e-10	-2.5865e-10	-5.92806e-11
		0.03672	-6.19326e-10	-2.58026e-10	-6.02166e-11
		0.03674	-6.17766e-10	-2.56466e-10	-6.20886e-11
		0.03676	-6.16518e-10	-2.54906e-10	-6.30246e-11
		0.03678	-6.14958e-10	-2.54282e-10	-6.45846e-11
		0.0368	-6.15894e-10	-2.53346e-10	-6.55206e-11
		0.03682	-6.16518e-10	-2.53034e-10	-6.52086e-11
		0.03684	-6.16518e-10	-2.54282e-10	-6.42726e-11
		0.03686	-6.17766e-10	-2.55842e-10	-6.33366e-11
		0.03688	-6.17142e-10	-2.57402e-10	-6.08406e-11
		0.0369	-6.17454e-10	-2.57714e-10	-5.86565e-11
		0.03692	-6.17454e-10	-2.56778e-10	-5.74085e-11
		0.03694	-6.17142e-10	-2.55842e-10	-5.74085e-11
		0.03696	-6.1683e-10	-2.54906e-10	-5.80325e-11
		0.03698	-6.15894e-10	-2.54906e-10	-5.77205e-11
		0.037	-6.16518e-10	-2.54282e-10	-6.02166e-11
		0.03702	-6.1683e-10	-2.53346e-10	-6.02166e-11
		0.03704	-6.17766e-10	-2.51162e-10	-6.17766e-11
		0.03706	-6.1839e-10	-2.50226e-10	-6.30246e-11
		0.03708	-6.18078e-10	-2.49914e-10	-6.36486e-11
		0.0371	-6.17454e-10	-2.5085e-10	-6.42726e-11
		0.03712	-6.1839e-10	-2.5241e-10	-6.52086e-11
		0.03714	-6.1839e-10	-2.55218e-10	-6.58326e-11
		0.03716	-6.18078e-10	-2.56778e-10	-6.58326e-11
		0.03718	-6.18078e-10	-2.56154e-10	-6.73926e-11
		0.0372	-6.18078e-10	-2.54906e-10	-6.80166e-11
		0.03722	-6.1839e-10	-2.53034e-10	-6.77046e-11
		0.03724	-6.19638e-10	-2.52722e-10	-6.70806e-11
		0.03726	-6.20574e-10	-2.51786e-10	-6.58326e-11
		0.03728	-6.21822e-10	-2.5241e-10	-6.52086e-11
		0.0373	-6.22134e-10	-2.5397e-10	-6.45846e-11
		0.03732	-6.21822e-10	-2.55218e-10	-6.42726e-11
		0.03734	-6.21198e-10	-2.56778e-10	-6.42726e-11
		0.03736	-6.20886e-10	-2.57714e-10	-6.42726e-11
		0.03738	-6.1995e-10	-2.58338e-10	-6.48966e-11
		0.0374	-6.1995e-10	-2.5709e-10	-6.61446e-11
		0.03742	-6.18702e-10	-2.54594e-10	-6.67686e-11
		0.03744	-6.19326e-10	-2.52098e-10	-6.58326e-11
		0.03746	-6.19014e-10	-2.50226e-10	-6.45846e-11
		0.03748	-6.1839e-10	-2.48666e-10	-6.24006e-11
		0.0375	-6.1839e-10	-2.48042e-10	-6.05286e-11
		0.03752	-6.18702e-10	-2.48666e-10	-5.99046e-11
		0.03754	-6.19014e-10	-2.48978e-10	-5.99046e-11
		0.03756	-6.19638e-10	-2.48978e-10	-6.05286e-11
		0.03758	-6.19326e-10	-2.48978e-10	-6.11526e-11
		0.0376	-6.19014e-10	-2.50226e-10	-6.27126e-11
		0.03762	-6.19326e-10	-2.5085e-10	-6.33366e-11
		0.03764	-6.19326e-10	-2.51786e-10	-6.24006e-11
		0.03766	-6.19326e-10	-2.52722e-10	-6.17766e-11
		0.03768	-6.21198e-10	-2.5397e-10	-6.11526e-11
		0.0377	-6.21198e-10	-2.53346e-10	-6.17766e-11
		0.03772	-6.21198e-10	-2.53658e-10	-6.30246e-11
		0.03774	-6.20886e-10	-2.52722e-10	-6.48966e-11
		0.03776	-6.20886e-10	-2.51786e-10	-6.55206e-11
		0.03778	-6.1995e-10	-2.52722e-10	-6.70806e-11
		0.0378	-6.20574e-10	-2.53034e-10	-6.73926e-11
		0.03782	-6.21822e-10	-2.53658e-10	-6.67686e-11
		0.03784	-6.22758e-10	-2.5553e-10	-6.52086e-11
		0.03786	-6.2307e-10	-2.56466e-10	-6.48966e-11
		0.03788	-6.22446e-10	-2.57714e-10	-6.55206e-11
		0.0379	-6.20574e-10	-2.58338e-10	-6.61446e-11
		0.03792	-6.20262e-10	-2.5709e-10	-6.58326e-11
		0.03794	-6.19326e-10	-2.54906e-10	-6.48966e-11
		0.03796	-6.19326e-10	-2.52722e-10	-6.30246e-11
		0.03798	-6.20262e-10	-2.50538e-10	-6.20886e-11
		0.038	-6.21198e-10	-2.4929e-10	-6.02166e-11
		0.03802	-6.20886e-10	-2.4773e-10	-6.05286e-11
		0.03804	-6.21198e-10	-2.48666e-10	-6.11526e-11
		0.03806	-6.1995e-10	-2.48978e-10	-6.45846e-11
		0.03808	-6.19014e-10	-2.49914e-10	-6.61446e-11
		0.0381	-6.18078e-10	-2.51474e-10	-6.86406e-11
		0.03812	-6.17766e-10	-2.5241e-10	-6.86406e-11
		0.03814	-6.17454e-10	-2.53346e-10	-6.80166e-11
		0.03816	-6.1839e-10	-2.55842e-10	-6.80166e-11
		0.03818	-6.1839e-10	-2.58338e-10	-6.67686e-11
		0.0382	-6.18702e-10	-2.59274e-10	-6.55206e-11
		0.03822	-6.19326e-10	-2.59274e-10	-6.48966e-11
		0.03824	-6.20262e-10	-2.5709e-10	-6.36486e-11
		0.03826	-6.2151e-10	-2.56778e-10	-6.20886e-11
		0.03828	-6.21822e-10	-2.5553e-10	-6.24006e-11
		0.0383	-6.22134e-10	-2.56466e-10	-6.24006e-11
		0.03832	-6.2151e-10	-2.58338e-10	-6.24006e-11
		0.03834	-6.22134e-10	-2.58026e-10	-6.36486e-11
		0.03836	-6.22446e-10	-2.58026e-10	-6.52086e-11
		0.03838	-6.22446e-10	-2.56778e-10	-6.67686e-11
		0.0384	-6.22446e-10	-2.54594e-10	-6.77046e-11
		0.03842	-6.22758e-10	-2.54282e-10	-6.77046e-11
		0.03844	-6.2151e-10	-2.53034e-10	-6.73926e-11
		0.03846	-6.2151e-10	-2.5241e-10	-6.70806e-11
		0.03848	-6.2151e-10	-2.53034e-10	-6.55206e-11
		0.0385	-6.22134e-10	-2.53346e-10	-6.48966e-11
		0.03852	-6.22446e-10	-2.53658e-10	-6.48966e-11
		0.03854	-6.22446e-10	-2.54282e-10	-6.55206e-11
		0.03856	-6.22134e-10	-2.5397e-10	-6.67686e-11
		0.03858	-6.21198e-10	-2.53034e-10	-6.80166e-11
		0.0386	-6.21198e-10	-2.51162e-10	-6.80166e-11
		0.03862	-6.20886e-10	-2.4929e-10	-6.80166e-11
		0.03864	-6.21198e-10	-2.48354e-10	-6.64566e-11
		0.03866	-6.20574e-10	-2.4773e-10	-6.48966e-11
		0.03868	-6.20262e-10	-2.48978e-10	-6.36486e-11
		0.0387	-6.20262e-10	-2.49914e-10	-6.42726e-11
		0.03872	-6.19014e-10	-2.50226e-10	-6.45846e-11
		0.03874	-6.18702e-10	-2.5241e-10	-6.48966e-11
		0.03876	-6.1839e-10	-2.5241e-10	-6.52086e-11
		0.03878	-6.1839e-10	-2.51786e-10	-6.48966e-11
		0.0388	-6.19014e-10	-2.51474e-10	-6.24006e-11
		0.03882	-6.18702e-10	-2.5085e-10	-6.20886e-11
		0.03884	-6.19014e-10	-2.50538e-10	-6.05286e-11
		0.03886	-6.18702e-10	-2.50226e-10	-6.11526e-11
		0.03888	-6.18702e-10	-2.50226e-10	-6.17766e-11
		0.0389	-6.19326e-10	-2.51474e-10	-6.27126e-11
		0.03892	-6.1995e-10	-2.52098e-10	-6.33366e-11
		0.03894	-6.20886e-10	-2.5241e-10	-6.42726e-11
		0.03896	-6.21822e-10	-2.53658e-10	-6.39606e-11
		0.03898	-6.22446e-10	-2.54906e-10	-6.36486e-11
		0.039	-6.2307e-10	-2.54282e-10	-6.39606e-11
		0.03902	-6.22134e-10	-2.54906e-10	-6.39606e-11
		0.03904	-6.22758e-10	-2.53658e-10	-6.42726e-11
		0.03906	-6.22446e-10	-2.51786e-10	-6.42726e-11
		0.03908	-6.20262e-10	-2.50538e-10	-6.45846e-11
		0.0391	-6.1995e-10	-2.49602e-10	-6.55206e-11
		0.03912	-6.19638e-10	-2.4773e-10	-6.55206e-11
		0.03914	-6.19638e-10	-2.47418e-10	-6.48966e-11
		0.03916	-6.1995e-10	-2.45858e-10	-6.42726e-11
		0.03918	-6.20262e-10	-2.45546e-10	-6.39606e-11
		0.0392	-6.19638e-10	-2.46794e-10	-6.39606e-11
		0.03922	-6.19638e-10	-2.46794e-10	-6.42726e-11
		0.03924	-6.18702e-10	-2.48042e-10	-6.39606e-11
		0.03926	-6.17454e-10	-2.50538e-10	-6.42726e-11
		0.03928	-6.1683e-10	-2.52722e-10	-6.39606e-11
		0.0393	-6.15894e-10	-2.55218e-10	-6.42726e-11
		0.03932	-6.15894e-10	-2.56778e-10	-6.30246e-11
		0.03934	-6.16518e-10	-2.5865e-10	-6.20886e-11
		0.03936	-6.17766e-10	-2.59274e-10	-6.11526e-11
		0.03938	-6.18702e-10	-2.59586e-10	-6.05286e-11
		0.0394	-6.19014e-10	-2.59898e-10	-6.11526e-11
		0.03942	-6.19326e-10	-2.59898e-10	-6.11526e-11
		0.03944	-6.19638e-10	-2.59898e-10	-6.27126e-11
		0.03946	-6.1995e-10	-2.61146e-10	-6.30246e-11
		0.03948	-6.21822e-10	-2.62082e-10	-6.48966e-11
		0.0395	-6.22758e-10	-2.62706e-10	-6.58326e-11
		0.03952	-6.22758e-10	-2.61458e-10	-6.70806e-11
		0.03954	-6.2307e-10	-2.6021e-10	-6.83286e-11
		0.03956	-6.22134e-10	-2.57714e-10	-6.77046e-11
		0.03958	-6.20262e-10	-2.54282e-10	-6.73926e-11
		0.0396	-6.19638e-10	-2.52098e-10	-6.70806e-11
		0.03962	-6.18702e-10	-2.51162e-10	-6.55206e-11
		0.03964	-6.1995e-10	-2.52098e-10	-6.42726e-11
		0.03966	-6.20262e-10	-2.52722e-10	-6.36486e-11
		0.03968	-6.20574e-10	-2.54594e-10	-6.42726e-11
		0.0397	-6.20262e-10	-2.5553e-10	-6.48966e-11
		0.03972	-6.20886e-10	-2.5553e-10	-6.55206e-11
		0.03974	-6.19014e-10	-2.54906e-10	-6.64566e-11
		0.03976	-6.1839e-10	-2.53034e-10	-6.61446e-11
		0.03978	-6.19014e-10	-2.52722e-10	-6.52086e-11
		0.0398	-6.1839e-10	-2.52098e-10	-6.45846e-11
		0.03982	-6.1995e-10	-2.53034e-10	-6.42726e-11
		0.03984	-6.20574e-10	-2.54906e-10	-6.36486e-11
		0.03986	-6.19014e-10	-2.5709e-10	-6.30246e-11
		0.03988	-6.19638e-10	-2.59274e-10	-6.42726e-11
		0.0399	-6.19326e-10	-2.59274e-10	-6.39606e-11
		0.03992	-6.19014e-10	-2.58338e-10	-6.39606e-11
[truncated: 23,303 more rows]

## Sheet: 200 Hz, PT, 2 Ca2+_Panel C
		Panel C1_sample EPSC traces					Panel C1_normalized EPSC amplitude vs stimulation (#)								Panel C1_average depression at EPSCs (#26-30)					Panel C2_normalized recovery from STD vs time interval (s)
		Time (s)	Control	Dynasore	Pitstop-2		Stimulation (#)	Control		Dynasore		Pitstop-2				Control	Dynasore	Pitstop-2		Time interval (s)	Control		Dynasore		Pitstop-2
								Mean	SEM	Mean	SEM	Mean	SEM		Mean	0.25	0.16	0.15			Mean	SEM	Mean	SEM	Mean	SEM
		0	-8.73608e-11	-1.34161e-10	-8.90671e-10		1	1	0	1	0	1	0		SEM	0.015	0.014	0.017		0.02	0.08	0.03	0.13	0.02	0.08	0.01
		2e-05	-8.61128e-11	-1.34161e-10	-8.90044e-10		2	0.748572	0.0406005	0.62802	0.0686572	0.591748	0.0262579		n number	10	6	7		0.1	0.45	0.08	0.42	0.03	0.41	0.02
		4e-05	-8.54888e-11	-1.33537e-10	-8.8879e-10		3	0.556216	0.0391269	0.4527	0.0540734	0.384756	0.0262016		p-value	--	0.0011	0.0004		0.3	0.53	0.08	0.57	0.04	0.58	0.03
		6e-05	-8.42408e-11	-1.32289e-10	-8.91297e-10		4	0.431854	0.026679	0.368647	0.0454302	0.339304	0.0161226							1	0.71	0.06	0.75	0.03	0.71	0.05
		8e-05	-8.48648e-11	-1.31665e-10	-8.91924e-10		5	0.370209	0.0220517	0.311563	0.0409308	0.293387	0.0207652							3	0.89	0.02	0.88	0.03	0.83	0.05
		0.0001	-8.67368e-11	-1.31041e-10	-8.93804e-10		6	0.336766	0.0192051	0.280853	0.0399928	0.255722	0.0213135							8	0.98	0.02	0.98	0.01	0.98	0.04
		0.00012	-8.67368e-11	-1.31665e-10	-8.95058e-10		7	0.329975	0.0174487	0.265657	0.0332077	0.240924	0.0155463							12	0.99	0.02	1.01	0.01	1	0.03
		0.00014	-8.86088e-11	-1.33537e-10	-8.96312e-10		8	0.310168	0.0192422	0.241853	0.0349522	0.209196	0.0131058							20	0.97	0.02	0.99	0.02	0.97	0.02
		0.00016	-8.98568e-11	-1.36033e-10	-8.96312e-10		9	0.317146	0.0179755	0.232546	0.0336474	0.204136	0.0230114
		0.00018	-8.86088e-11	-1.36033e-10	-8.96312e-10		10	0.294993	0.0214834	0.217914	0.0389415	0.209682	0.0200473
		0.0002	-8.92328e-11	-1.36033e-10	-8.95058e-10		11	0.29488	0.0188281	0.197804	0.0327288	0.173835	0.015409
		0.00022	-8.86088e-11	-1.34161e-10	-8.95058e-10		12	0.272506	0.0163748	0.184725	0.0209234	0.189734	0.0167436
		0.00024	-8.86088e-11	-1.34161e-10	-8.95685e-10		13	0.268817	0.0228478	0.186694	0.0299047	0.170913	0.0133137
		0.00026	-8.98568e-11	-1.31665e-10	-8.95685e-10		14	0.262687	0.0156159	0.171951	0.0255002	0.167805	0.0151217
		0.00028	-8.86088e-11	-1.30417e-10	-8.93804e-10		15	0.252009	0.0188091	0.173922	0.0295759	0.149486	0.0134161
		0.0003	-8.98568e-11	-1.32289e-10	-8.93804e-10		16	0.258875	0.0179693	0.1564	0.0207224	0.150047	0.0174723
		0.00032	-8.98568e-11	-1.29793e-10	-8.94431e-10		17	0.244071	0.0162899	0.165019	0.0204775	0.161891	0.0129129
		0.00034	-9.11049e-11	-1.30417e-10	-8.90671e-10		18	0.236993	0.0102215	0.160452	0.0229376	0.156046	0.016762
		0.00036	-8.86088e-11	-1.31041e-10	-8.90671e-10		19	0.229931	0.0197899	0.146866	0.0172086	0.157622	0.0170193
		0.00038	-8.73608e-11	-1.31665e-10	-8.92551e-10		20	0.242926	0.014417	0.147252	0.0137344	0.139819	0.0165436
		0.0004	-8.73608e-11	-1.33537e-10	-8.90671e-10		21	0.22815	0.0177831	0.14329	0.0136429	0.132493	0.0146035
		0.00042	-8.61128e-11	-1.33537e-10	-8.91924e-10		22	0.233266	0.01729	0.144861	0.0156019	0.139397	0.0127286
		0.00044	-8.61128e-11	-1.34161e-10	-8.93178e-10		23	0.249883	0.0204313	0.157864	0.0111514	0.138809	0.0159833
		0.00046	-8.61128e-11	-1.35409e-10	-8.93178e-10		24	0.248843	0.0176258	0.15567	0.018289	0.150815	0.0183292
		0.00048	-8.54888e-11	-1.33537e-10	-8.94431e-10		25	0.237758	0.0188012	0.159236	0.0126709	0.152797	0.0168277
		0.0005	-8.73608e-11	-1.34161e-10	-8.93804e-10		26	0.251854	0.0172756	0.147402	0.0189995	0.143141	0.0176308
		0.00052	-8.79848e-11	-1.32289e-10	-8.95058e-10		27	0.248214	0.0186871	0.170767	0.0175534	0.147473	0.0174514
		0.00054	-8.67368e-11	-1.33537e-10	-8.95058e-10		28	0.244939	0.0161626	0.16628	0.0164675	0.154836	0.0202455
		0.00056	-8.79848e-11	-1.31665e-10	-8.95058e-10		29	0.250258	0.0200213	0.151569	0.0138974	0.146666	0.0195046
		0.00058	-9.04808e-11	-1.32289e-10	-8.95058e-10		30	0.25827	0.0132282	0.165003	0.0154707	0.15237	0.0171721
		0.0006	-9.11049e-11	-1.31041e-10	-8.95685e-10
		0.00062	-9.29769e-11	-1.32289e-10	-8.97565e-10
		0.00064	-9.48489e-11	-1.33537e-10	-8.96312e-10
		0.00066	-9.42249e-11	-1.32289e-10	-8.96938e-10
		0.00068	-9.42249e-11	-1.34161e-10	-8.97565e-10
		0.0007	-9.11049e-11	-1.31665e-10	-8.97565e-10
		0.00072	-9.11049e-11	-1.29793e-10	-8.96938e-10
		0.00074	-8.79848e-11	-1.28545e-10	-8.95058e-10
		0.00076	-8.67368e-11	-1.28545e-10	-8.93804e-10
		0.00078	-8.36168e-11	-1.27921e-10	-8.94431e-10
		0.0008	-8.23688e-11	-1.27921e-10	-8.95685e-10
		0.00082	-8.29928e-11	-1.29793e-10	-8.96938e-10
		0.00084	-8.36168e-11	-1.30417e-10	-8.98819e-10
		0.00086	-8.23688e-11	-1.31665e-10	-8.98819e-10
		0.00088	-8.23688e-11	-1.30417e-10	-8.98819e-10
		0.0009	-8.29928e-11	-1.31665e-10	-8.98819e-10
		0.00092	-8.17448e-11	-1.30417e-10	-8.96312e-10
		0.00094	-8.48648e-11	-1.30417e-10	-8.96938e-10
		0.00096	-8.73608e-11	-1.29169e-10	-8.94431e-10
		0.00098	-8.86088e-11	-1.29793e-10	-8.93178e-10
		0.001	-8.86088e-11	-1.29793e-10	-8.90044e-10
		0.00102	-9.11049e-11	-1.28545e-10	-8.90044e-10
		0.00104	-9.04808e-11	-1.29169e-10	-8.8879e-10
		0.00106	-8.92328e-11	-1.28545e-10	-8.8879e-10
		0.00108	-8.86088e-11	-1.27297e-10	-8.90671e-10
		0.0011	-8.73608e-11	-1.28545e-10	-8.91297e-10
		0.00112	-8.86088e-11	-1.29169e-10	-8.92551e-10
		0.00114	-8.86088e-11	-1.28545e-10	-8.94431e-10
		0.00116	-8.86088e-11	-1.29169e-10	-8.94431e-10
		0.00118	-9.04808e-11	-1.30417e-10	-8.95058e-10
		0.0012	-8.86088e-11	-1.31041e-10	-8.95685e-10
		0.00122	-8.67368e-11	-1.31041e-10	-8.97565e-10
		0.00124	-8.67368e-11	-1.30417e-10	-8.97565e-10
		0.00126	-8.67368e-11	-1.30417e-10	-8.99446e-10
		0.00128	-8.61128e-11	-1.28545e-10	-9.00072e-10
		0.0013	-8.67368e-11	-1.29169e-10	-9.01326e-10
		0.00132	-8.67368e-11	-1.27297e-10	-9.00699e-10
		0.00134	-8.73608e-11	-1.27921e-10	-9.00699e-10
		0.00136	-8.79848e-11	-1.27921e-10	-8.98819e-10
		0.00138	-8.67368e-11	-1.29169e-10	-8.98192e-10
		0.0014	-8.61128e-11	-1.29793e-10	-8.95058e-10
		0.00142	-8.86088e-11	-1.30417e-10	-8.93804e-10
		0.00144	-8.73608e-11	-1.31665e-10	-8.94431e-10
		0.00146	-8.79848e-11	-1.31041e-10	-8.94431e-10
		0.00148	-8.86088e-11	-1.33537e-10	-8.94431e-10
		0.0015	-9.04808e-11	-1.31665e-10	-8.96312e-10
		0.00152	-9.11049e-11	-1.31041e-10	-8.97565e-10
		0.00154	-8.98568e-11	-1.29793e-10	-8.98192e-10
		0.00156	-9.04808e-11	-1.29793e-10	-9.00072e-10
		0.00158	-8.73608e-11	-1.30417e-10	-9.01953e-10
		0.0016	-8.67368e-11	-1.30417e-10	-9.0258e-10
		0.00162	-8.67368e-11	-1.29169e-10	-9.03206e-10
		0.00164	-8.61128e-11	-1.29793e-10	-9.03833e-10
		0.00166	-8.67368e-11	-1.29169e-10	-9.03206e-10
		0.00168	-8.73608e-11	-1.29793e-10	-9.0258e-10
		0.0017	-8.79848e-11	-1.27297e-10	-9.03206e-10
		0.00172	-8.92328e-11	-1.27297e-10	-9.01953e-10
		0.00174	-8.92328e-11	-1.26049e-10	-9.03206e-10
		0.00176	-9.04808e-11	-1.26049e-10	-9.0258e-10
		0.00178	-8.98568e-11	-1.24177e-10	-9.0258e-10
		0.0018	-8.98568e-11	-1.24801e-10	-9.00072e-10
		0.00182	-8.98568e-11	-1.26049e-10	-8.97565e-10
		0.00184	-8.73608e-11	-1.27297e-10	-8.98819e-10
		0.00186	-8.86088e-11	-1.27921e-10	-8.98192e-10
		0.00188	-8.73608e-11	-1.26673e-10	-8.97565e-10
		0.0019	-8.48648e-11	-1.27921e-10	-8.96938e-10
		0.00192	-8.48648e-11	-1.27921e-10	-8.96312e-10
		0.00194	-8.42408e-11	-1.27921e-10	-8.94431e-10
		0.00196	-8.48648e-11	-1.27297e-10	-8.93804e-10
		0.00198	-8.54888e-11	-1.27297e-10	-8.93804e-10
		0.002	-8.61128e-11	-1.28545e-10	-8.92551e-10
		0.00202	-8.73608e-11	-1.27297e-10	-8.91924e-10
		0.00204	-8.67368e-11	-1.27297e-10	-8.91297e-10
		0.00206	-8.54888e-11	-1.27297e-10	-8.90671e-10
		0.00208	-8.48648e-11	-1.28545e-10	-8.90044e-10
		0.0021	-8.61128e-11	-1.30417e-10	-8.90671e-10
		0.00212	-8.54888e-11	-1.31665e-10	-8.90671e-10
		0.00214	-8.54888e-11	-1.32289e-10	-8.91924e-10
		0.00216	-8.61128e-11	-1.32289e-10	-8.91924e-10
		0.00218	-8.42408e-11	-1.31041e-10	-8.96312e-10
		0.0022	-8.36168e-11	-1.29169e-10	-8.96938e-10
		0.00222	-8.54888e-11	-1.27297e-10	-8.97565e-10
		0.00224	-8.23688e-11	-1.26673e-10	-8.98819e-10
		0.00226	-8.23688e-11	-1.27297e-10	-9.00072e-10
		0.00228	-8.48648e-11	-1.26673e-10	-8.98192e-10
		0.0023	-8.54888e-11	-1.27297e-10	-8.98192e-10
		0.00232	-8.61128e-11	-1.27921e-10	-8.96938e-10
		0.00234	-8.79848e-11	-1.27297e-10	-8.96938e-10
		0.00236	-8.86088e-11	-1.27297e-10	-8.95058e-10
		0.00238	-8.86088e-11	-1.27921e-10	-8.96312e-10
		0.0024	-9.04808e-11	-1.27921e-10	-8.95685e-10
		0.00242	-9.17289e-11	-1.26673e-10	-8.95058e-10
		0.00244	-9.23529e-11	-1.26049e-10	-8.93178e-10
		0.00246	-9.17289e-11	-1.27297e-10	-8.91924e-10
		0.00248	-9.17289e-11	-1.26049e-10	-8.91297e-10
		0.0025	-9.17289e-11	-1.26673e-10	-8.93178e-10
		0.00252	-8.98568e-11	-1.27297e-10	-8.91924e-10
		0.00254	-8.98568e-11	-1.26673e-10	-8.90671e-10
		0.00256	-8.86088e-11	-1.26049e-10	-8.90044e-10
		0.00258	-8.86088e-11	-1.27297e-10	-8.90671e-10
		0.0026	-8.86088e-11	-1.27921e-10	-8.91924e-10
		0.00262	-8.79848e-11	-1.28545e-10	-8.94431e-10
		0.00264	-8.92328e-11	-1.29169e-10	-8.96938e-10
		0.00266	-8.73608e-11	-1.29169e-10	-8.97565e-10
		0.00268	-8.98568e-11	-1.29793e-10	-8.96938e-10
		0.0027	-8.79848e-11	-1.31041e-10	-8.95058e-10
		0.00272	-8.86088e-11	-1.29793e-10	-8.93178e-10
		0.00274	-8.61128e-11	-1.28545e-10	-8.91924e-10
		0.00276	-8.73608e-11	-1.29169e-10	-8.90671e-10
		0.00278	-8.67368e-11	-1.30417e-10	-8.90671e-10
		0.0028	-8.73608e-11	-1.28545e-10	-8.90671e-10
		0.00282	-8.67368e-11	-1.30417e-10	-8.91297e-10
		0.00284	-8.73608e-11	-1.30417e-10	-8.92551e-10
		0.00286	-8.92328e-11	-1.29169e-10	-8.91297e-10
		0.00288	-8.86088e-11	-1.27921e-10	-8.93178e-10
		0.0029	-9.04808e-11	-1.26673e-10	-8.91924e-10
		0.00292	-8.98568e-11	-1.26049e-10	-8.91297e-10
		0.00294	-9.11049e-11	-1.25425e-10	-8.90044e-10
		0.00296	-9.04808e-11	-1.25425e-10	-8.8879e-10
		0.00298	-9.04808e-11	-1.26673e-10	-8.89417e-10
		0.003	-9.17289e-11	-1.24801e-10	-8.90044e-10
		0.00302	-9.17289e-11	-1.25425e-10	-8.90044e-10
		0.00304	-9.11049e-11	-1.24177e-10	-8.89417e-10
		0.00306	-9.04808e-11	-1.24801e-10	-8.94431e-10
		0.00308	-8.98568e-11	-1.23553e-10	-9.06967e-10
		0.0031	-9.17289e-11	-1.24801e-10	-9.19503e-10
		0.00312	-9.23529e-11	-1.24801e-10	-9.28905e-10
		0.00314	-9.36009e-11	-1.24801e-10	-9.27024e-10
		0.00316	-9.48489e-11	-1.22929e-10	-9.18249e-10
		0.00318	-9.48489e-11	-1.24177e-10	-9.05087e-10
		0.0032	-9.42249e-11	-1.21057e-10	-8.95685e-10
		0.00322	-9.17289e-11	-1.21057e-10	-8.8879e-10
		0.00324	-8.98568e-11	-1.22305e-10	-8.91924e-10
		0.00326	-8.79848e-11	-1.24177e-10	-8.99446e-10
		0.00328	-8.67368e-11	-1.27297e-10	-9.13862e-10
		0.0033	-8.73608e-11	-1.31665e-10	-9.25144e-10
		0.00332	-8.73608e-11	-1.34785e-10	-9.40187e-10
		0.00334	-8.73608e-11	-1.38529e-10	-9.52096e-10
		0.00336	-8.86088e-11	-1.42273e-10	-9.64632e-10
		0.00338	-8.79848e-11	-1.46641e-10	-9.72153e-10
		0.0034	-8.86088e-11	-1.47265e-10	-9.79048e-10
		0.00342	-8.98568e-11	-1.49761e-10	-9.85943e-10
		0.00344	-8.98568e-11	-1.53505e-10	-9.9033e-10
		0.00346	-9.23529e-11	-1.55377e-10	-9.92837e-10
		0.00348	-9.11049e-11	-1.57873e-10	-9.95971e-10
		0.0035	-9.23529e-11	-1.59745e-10	-9.95971e-10
		0.00352	-9.17289e-11	-1.58497e-10	-9.94718e-10
		0.00354	-9.11049e-11	-1.59121e-10	-9.95971e-10
		0.00356	-8.98568e-11	-1.60993e-10	-9.96598e-10
		0.00358	-8.79848e-11	-1.61618e-10	-9.97852e-10
		0.0036	-8.92328e-11	-1.62242e-10	-9.99732e-10
		0.00362	-8.92328e-11	-1.64114e-10	-9.99105e-10
		0.00364	-8.98568e-11	-1.6349e-10	-9.99105e-10
		0.00366	-8.98568e-11	-1.64738e-10	-9.98479e-10
		0.00368	-9.04808e-11	-1.62866e-10	-9.97852e-10
		0.0037	-8.92328e-11	-1.60993e-10	-9.95345e-10
		0.00372	-8.79848e-11	-1.60369e-10	-9.93464e-10
		0.00374	-8.73608e-11	-1.57873e-10	-9.92837e-10
		0.00376	-8.54888e-11	-1.57249e-10	-9.91584e-10
		0.00378	-8.61128e-11	-1.59745e-10	-9.91584e-10
		0.0038	-8.79848e-11	-1.60993e-10	-9.9033e-10
		0.00382	-8.86088e-11	-1.62242e-10	-9.89077e-10
		0.00384	-8.92328e-11	-1.64114e-10	-9.8845e-10
		0.00386	-9.04808e-11	-1.61618e-10	-9.87823e-10
		0.00388	-9.11049e-11	-1.60993e-10	-9.89704e-10
		0.0039	-9.17289e-11	-1.59745e-10	-9.8845e-10
		0.00392	-8.98568e-11	-1.57873e-10	-9.8845e-10
		0.00394	-8.86088e-11	-1.56625e-10	-9.8845e-10
		0.00396	-8.86088e-11	-1.56625e-10	-9.87196e-10
		0.00398	-8.92328e-11	-1.56001e-10	-9.8657e-10
		0.004	-8.86088e-11	-1.57249e-10	-9.81555e-10
		0.00402	-8.86088e-11	-1.57249e-10	-9.79675e-10
		0.00404	-8.86088e-11	-1.56625e-10	-9.78421e-10
		0.00406	-8.79848e-11	-1.56001e-10	-9.77168e-10
		0.00408	-8.86088e-11	-1.55377e-10	-9.74661e-10
		0.0041	-8.86088e-11	-1.54129e-10	-9.75287e-10
		0.00412	-9.17289e-11	-1.54129e-10	-9.75914e-10
		0.00414	-9.23529e-11	-1.52257e-10	-9.75914e-10
		0.00416	-9.11049e-11	-1.52257e-10	-9.75287e-10
		0.00418	-9.36009e-11	-1.52257e-10	-9.74034e-10
		0.0042	-9.42249e-11	-1.49137e-10	-9.7278e-10
		0.00422	-9.36009e-11	-1.49761e-10	-9.72153e-10
		0.00424	-9.23529e-11	-1.51009e-10	-9.70273e-10
		0.00426	-9.17289e-11	-1.51009e-10	-9.70273e-10
		0.00428	-9.11049e-11	-1.51009e-10	-9.69646e-10
		0.0043	-8.92328e-11	-1.49761e-10	-9.709e-10
		0.00432	-8.98568e-11	-1.49761e-10	-9.69019e-10
		0.00434	-8.86088e-11	-1.49137e-10	-9.68393e-10
		0.00436	-8.67368e-11	-1.50385e-10	-9.66512e-10
		0.00438	-8.92328e-11	-1.51009e-10	-9.67766e-10
		0.0044	-8.98568e-11	-1.51009e-10	-9.68393e-10
		0.00442	-8.79848e-11	-1.51009e-10	-9.68393e-10
		0.00444	-8.92328e-11	-1.52257e-10	-9.72153e-10
		0.00446	-8.86088e-11	-1.52257e-10	-9.72153e-10
		0.00448	-8.86088e-11	-1.51009e-10	-9.71527e-10
		0.0045	-8.92328e-11	-1.51633e-10	-9.69646e-10
		0.00452	-8.92328e-11	-1.50385e-10	-9.69019e-10
		0.00454	-8.86088e-11	-1.49761e-10	-9.65885e-10
		0.00456	-8.92328e-11	-1.47889e-10	-9.64632e-10
		0.00458	-8.73608e-11	-1.46641e-10	-9.61498e-10
		0.0046	-8.73608e-11	-1.45393e-10	-9.60871e-10
		0.00462	-8.61128e-11	-1.45393e-10	-9.60244e-10
		0.00464	-8.48648e-11	-1.43521e-10	-9.60871e-10
		0.00466	-8.48648e-11	-1.44145e-10	-9.61498e-10
		0.00468	-8.48648e-11	-1.43521e-10	-9.63378e-10
		0.0047	-8.48648e-11	-1.43521e-10	-9.64632e-10
		0.00472	-8.54888e-11	-1.45393e-10	-9.65259e-10
		0.00474	-8.79848e-11	-1.46641e-10	-9.64005e-10
		0.00476	-8.79848e-11	-1.47265e-10	-9.61498e-10
		0.00478	-8.98568e-11	-1.46017e-10	-9.60244e-10
		0.0048	-9.04808e-11	-1.47889e-10	-9.59618e-10
		0.00482	-9.42249e-11	-1.46017e-10	-9.59618e-10
		0.00484	-9.54729e-11	-1.46641e-10	-9.57737e-10
		0.00486	-9.54729e-11	-1.45393e-10	-9.59618e-10
		0.00488	-9.54729e-11	-1.44145e-10	-9.58364e-10
		0.0049	-9.42249e-11	-1.41649e-10	-9.60244e-10
		0.00492	-9.11049e-11	-1.41649e-10	-9.58991e-10
		0.00494	-9.04808e-11	-1.41649e-10	-9.60871e-10
		0.00496	-8.98568e-11	-1.42897e-10	-9.62125e-10
		0.00498	-9.04808e-11	-1.41025e-10	-9.62752e-10
		0.005	-9.17289e-11	-1.39153e-10	-9.62752e-10
		0.00502	-9.11049e-11	-1.39777e-10	-9.62125e-10
		0.00504	-9.23529e-11	-1.37281e-10	-9.64632e-10
		0.00506	-9.42249e-11	-1.39153e-10	-9.65259e-10
		0.00508	-9.42249e-11	-1.37281e-10	-9.65885e-10
		0.0051	-9.23529e-11	-1.39777e-10	-9.64632e-10
		0.00512	-9.17289e-11	-1.41025e-10	-9.65259e-10
		0.00514	-9.04808e-11	-1.42897e-10	-9.62752e-10
		0.00516	-9.04808e-11	-1.42273e-10	-9.62752e-10
		0.00518	-9.04808e-11	-1.42273e-10	-9.62125e-10
		0.0052	-9.04808e-11	-1.41025e-10	-9.63378e-10
		0.00522	-8.92328e-11	-1.41649e-10	-9.64005e-10
		0.00524	-8.92328e-11	-1.41025e-10	-9.65885e-10
		0.00526	-8.79848e-11	-1.41025e-10	-9.62752e-10
		0.00528	-8.67368e-11	-1.41025e-10	-9.60244e-10
		0.0053	-8.67368e-11	-1.41025e-10	-9.60244e-10
		0.00532	-8.61128e-11	-1.39153e-10	-9.57737e-10
		0.00534	-8.73608e-11	-1.39153e-10	-9.55857e-10
		0.00536	-8.79848e-11	-1.37905e-10	-9.57737e-10
		0.00538	-8.67368e-11	-1.38529e-10	-9.58364e-10
		0.0054	-8.54888e-11	-1.38529e-10	-9.58991e-10
		0.00542	-8.54888e-11	-1.37905e-10	-9.57737e-10
		0.00544	-8.54888e-11	-1.39153e-10	-9.56484e-10
		0.00546	-8.73608e-11	-1.40401e-10	-9.55857e-10
		0.00548	-8.86088e-11	-1.43521e-10	-9.5523e-10
		0.0055	-8.98568e-11	-1.44145e-10	-9.52723e-10
		0.00552	-9.23529e-11	-1.44145e-10	-9.50216e-10
		0.00554	-9.11049e-11	-1.45393e-10	-9.50216e-10
		0.00556	-9.29769e-11	-1.45393e-10	-9.52096e-10
		0.00558	-9.23529e-11	-1.44145e-10	-9.52096e-10
		0.0056	-9.29769e-11	-1.45393e-10	-9.53976e-10
		0.00562	-9.29769e-11	-1.46641e-10	-9.53976e-10
		0.00564	-9.36009e-11	-1.46017e-10	-9.55857e-10
		0.00566	-9.42249e-11	-1.46641e-10	-9.56484e-10
		0.00568	-9.36009e-11	-1.45393e-10	-9.55857e-10
		0.0057	-9.42249e-11	-1.44769e-10	-9.57737e-10
		0.00572	-9.36009e-11	-1.44769e-10	-9.58364e-10
		0.00574	-9.17289e-11	-1.42273e-10	-9.58364e-10
		0.00576	-9.04808e-11	-1.41025e-10	-9.59618e-10
		0.00578	-9.04808e-11	-1.42897e-10	-9.59618e-10
		0.0058	-8.92328e-11	-1.42897e-10	-9.60871e-10
		0.00582	-8.92328e-11	-1.44145e-10	-9.5711e-10
		0.00584	-8.98568e-11	-1.44145e-10	-9.5711e-10
		0.00586	-8.98568e-11	-1.42273e-10	-9.5335e-10
		0.00588	-8.86088e-11	-1.41649e-10	-9.54603e-10
		0.0059	-8.92328e-11	-1.39777e-10	-9.5335e-10
		0.00592	-9.11049e-11	-1.39153e-10	-9.52723e-10
		0.00594	-9.04808e-11	-1.39153e-10	-9.55857e-10
		0.00596	-9.04808e-11	-1.39777e-10	-9.57737e-10
		0.00598	-9.17289e-11	-1.41025e-10	-9.58991e-10
		0.006	-9.11049e-11	-1.41649e-10	-9.59618e-10
		0.00602	-8.92328e-11	-1.41649e-10	-9.61498e-10
		0.00604	-8.92328e-11	-1.41649e-10	-9.59618e-10
		0.00606	-8.79848e-11	-1.41649e-10	-9.54603e-10
		0.00608	-8.79848e-11	-1.41025e-10	-9.43948e-10
		0.0061	-8.79848e-11	-1.41649e-10	-9.30785e-10
		0.00612	-8.67368e-11	-1.43521e-10	-9.23264e-10
		0.00614	-8.92328e-11	-1.45393e-10	-9.2389e-10
		0.00616	-9.04808e-11	-1.47889e-10	-9.32666e-10
		0.00618	-9.11049e-11	-1.48513e-10	-9.43948e-10
		0.0062	-8.98568e-11	-1.49137e-10	-9.5335e-10
		0.00622	-9.04808e-11	-1.50385e-10	-9.57737e-10
		0.00624	-9.04808e-11	-1.46017e-10	-9.5523e-10
		0.00626	-9.11049e-11	-1.44769e-10	-9.47709e-10
		0.00628	-9.23529e-11	-1.40401e-10	-9.37053e-10
		0.0063	-9.42249e-11	-1.34785e-10	-9.2389e-10
		0.00632	-9.36009e-11	-1.29793e-10	-9.10101e-10
		0.00634	-9.42249e-11	-1.27297e-10	-8.97565e-10
		0.00636	-9.36009e-11	-1.22305e-10	-8.85656e-10
		0.00638	-9.04808e-11	-1.19809e-10	-8.75628e-10
		0.0064	-8.98568e-11	-1.18561e-10	-8.68106e-10
		0.00642	-8.98568e-11	-1.17937e-10	-8.64345e-10
		0.00644	-9.04808e-11	-1.17313e-10	-8.61211e-10
		0.00646	-9.17289e-11	-1.17313e-10	-8.57451e-10
		0.00648	-9.23529e-11	-1.17313e-10	-8.54317e-10
		0.0065	-9.42249e-11	-1.16065e-10	-8.53063e-10
		0.00652	-9.23529e-11	-1.14817e-10	-8.49929e-10
		0.00654	-9.23529e-11	-1.12321e-10	-8.49302e-10
		0.00656	-9.11049e-11	-1.11073e-10	-8.49929e-10
		0.00658	-9.04808e-11	-1.10449e-10	-8.50556e-10
		0.0066	-8.86088e-11	-1.10449e-10	-8.51183e-10
		0.00662	-9.11049e-11	-1.12321e-10	-8.49929e-10
		0.00664	-9.17289e-11	-1.13569e-10	-8.48676e-10
		0.00666	-9.11049e-11	-1.14193e-10	-8.48049e-10
		0.00668	-9.36009e-11	-1.13569e-10	-8.48049e-10
		0.0067	-9.23529e-11	-1.11697e-10	-8.46795e-10
		0.00672	-9.11049e-11	-1.11697e-10	-8.46795e-10
		0.00674	-9.04808e-11	-1.11073e-10	-8.46795e-10
		0.00676	-9.11049e-11	-1.11073e-10	-8.47422e-10
		0.00678	-8.92328e-11	-1.11697e-10	-8.48049e-10
		0.0068	-8.79848e-11	-1.11697e-10	-8.48049e-10
		0.00682	-8.67368e-11	-1.11073e-10	-8.49929e-10
		0.00684	-8.73608e-11	-1.12945e-10	-8.49929e-10
		0.00686	-8.73608e-11	-1.11073e-10	-8.51183e-10
		0.00688	-8.92328e-11	-1.11697e-10	-8.51183e-10
		0.0069	-9.11049e-11	-1.09825e-10	-8.51183e-10
		0.00692	-9.23529e-11	-1.09825e-10	-8.54317e-10
		0.00694	-9.23529e-11	-1.12945e-10	-8.56824e-10
		0.00696	-9.36009e-11	-1.12945e-10	-8.57451e-10
		0.00698	-9.36009e-11	-1.14817e-10	-8.60585e-10
		0.007	-9.42249e-11	-1.16065e-10	-8.61838e-10
		0.00702	-9.42249e-11	-1.16065e-10	-8.63718e-10
		0.00704	-9.11049e-11	-1.15441e-10	-8.64972e-10
		0.00706	-9.17289e-11	-1.14193e-10	-8.67479e-10
		0.00708	-9.04808e-11	-1.12945e-10	-8.68733e-10
		0.0071	-9.17289e-11	-1.14817e-10	-8.7124e-10
		0.00712	-9.11049e-11	-1.14817e-10	-8.73747e-10
		0.00714	-9.29769e-11	-1.15441e-10	-8.73747e-10
		0.00716	-9.17289e-11	-1.15441e-10	-8.76881e-10
		0.00718	-9.23529e-11	-1.15441e-10	-8.74374e-10
		0.0072	-9.36009e-11	-1.14193e-10	-8.72494e-10
		0.00722	-9.48489e-11	-1.14193e-10	-8.6936e-10
		0.00724	-9.23529e-11	-1.14817e-10	-8.6936e-10
		0.00726	-9.17289e-11	-1.15441e-10	-8.6936e-10
		0.00728	-8.79848e-11	-1.17313e-10	-8.72494e-10
		0.0073	-8.98568e-11	-1.20433e-10	-8.76254e-10
		0.00732	-8.98568e-11	-1.19185e-10	-8.78135e-10
		0.00734	-9.04808e-11	-1.19185e-10	-8.75628e-10
		0.00736	-8.86088e-11	-1.18561e-10	-8.72494e-10
		0.00738	-8.86088e-11	-1.17937e-10	-8.70613e-10
		0.0074	-8.98568e-11	-1.16065e-10	-8.68733e-10
		0.00742	-8.86088e-11	-1.16065e-10	-8.67479e-10
		0.00744	-8.86088e-11	-1.18561e-10	-8.68733e-10
		0.00746	-8.73608e-11	-1.18561e-10	-8.68733e-10
		0.00748	-8.86088e-11	-1.21681e-10	-8.69986e-10
		0.0075	-9.04808e-11	-1.20433e-10	-8.7312e-10
		0.00752	-8.98568e-11	-1.21057e-10	-8.74374e-10
		0.00754	-9.17289e-11	-1.21057e-10	-8.77508e-10
		0.00756	-9.23529e-11	-1.20433e-10	-8.78135e-10
		0.00758	-9.48489e-11	-1.19185e-10	-8.78762e-10
		0.0076	-9.73449e-11	-1.17937e-10	-8.78135e-10
		0.00762	-9.60969e-11	-1.19809e-10	-8.77508e-10
		0.00764	-9.73449e-11	-1.18561e-10	-8.77508e-10
		0.00766	-9.73449e-11	-1.17937e-10	-8.78762e-10
		0.00768	-9.60969e-11	-1.18561e-10	-8.78762e-10
		0.0077	-9.60969e-11	-1.19185e-10	-8.79388e-10
		0.00772	-9.60969e-11	-1.18561e-10	-8.78135e-10
		0.00774	-9.48489e-11	-1.17313e-10	-8.78135e-10
		0.00776	-9.54729e-11	-1.16689e-10	-8.77508e-10
		0.00778	-9.36009e-11	-1.18561e-10	-8.79388e-10
		0.0078	-9.17289e-11	-1.19185e-10	-8.80642e-10
		0.00782	-9.23529e-11	-1.20433e-10	-8.82522e-10
		0.00784	-9.17289e-11	-1.23553e-10	-8.83149e-10
		0.00786	-9.17289e-11	-1.24177e-10	-8.83149e-10
		0.00788	-9.17289e-11	-1.23553e-10	-8.81269e-10
		0.0079	-9.04808e-11	-1.21057e-10	-8.82522e-10
		0.00792	-9.04808e-11	-1.22929e-10	-8.82522e-10
		0.00794	-8.86088e-11	-1.23553e-10	-8.82522e-10
		0.00796	-8.86088e-11	-1.21057e-10	-8.84403e-10
		0.00798	-8.86088e-11	-1.21057e-10	-8.85656e-10
		0.008	-8.67368e-11	-1.19809e-10	-8.86283e-10
		0.00802	-8.54888e-11	-1.17313e-10	-8.88163e-10
		0.00804	-8.67368e-11	-1.17313e-10	-8.88163e-10
		0.00806	-8.73608e-11	-1.17313e-10	-8.87537e-10
		0.00808	-8.86088e-11	-1.18561e-10	-8.8691e-10
		0.0081	-8.86088e-11	-1.19185e-10	-8.8691e-10
		0.00812	-9.04808e-11	-1.18561e-10	-8.86283e-10
		0.00814	-9.11049e-11	-1.19185e-10	-8.8691e-10
		0.00816	-8.98568e-11	-1.18561e-10	-8.8691e-10
		0.00818	-8.92328e-11	-1.18561e-10	-8.8691e-10
		0.0082	-8.73608e-11	-1.18561e-10	-8.88163e-10
		0.00822	-8.61128e-11	-1.17937e-10	-8.87537e-10
		0.00824	-8.67368e-11	-1.17313e-10	-8.8691e-10
		0.00826	-8.61128e-11	-1.18561e-10	-8.87537e-10
		0.00828	-8.79848e-11	-1.18561e-10	-8.89417e-10
		0.0083	-8.79848e-11	-1.21681e-10	-8.90044e-10
		0.00832	-8.86088e-11	-1.23553e-10	-8.89417e-10
		0.00834	-8.92328e-11	-1.23553e-10	-8.91924e-10
		0.00836	-8.98568e-11	-1.25425e-10	-8.90671e-10
		0.00838	-9.04808e-11	-1.24177e-10	-8.91924e-10
		0.0084	-8.98568e-11	-1.25425e-10	-8.91924e-10
		0.00842	-9.04808e-11	-1.24801e-10	-8.91297e-10
		0.00844	-9.04808e-11	-1.24801e-10	-8.92551e-10
		0.00846	-8.98568e-11	-1.25425e-10	-8.90671e-10
		0.00848	-8.92328e-11	-1.24177e-10	-8.89417e-10
		0.0085	-8.98568e-11	-1.22929e-10	-8.90044e-10
		0.00852	-9.04808e-11	-1.22305e-10	-8.8879e-10
		0.00854	-8.92328e-11	-1.21057e-10	-8.90044e-10
		0.00856	-8.79848e-11	-1.20433e-10	-8.90044e-10
		0.00858	-8.73608e-11	-1.19809e-10	-8.91297e-10
		0.0086	-8.92328e-11	-1.19809e-10	-8.89417e-10
		0.00862	-8.73608e-11	-1.20433e-10	-8.90044e-10
		0.00864	-8.92328e-11	-1.22305e-10	-8.90044e-10
		0.00866	-8.92328e-11	-1.22929e-10	-8.90671e-10
		0.00868	-8.98568e-11	-1.20433e-10	-8.92551e-10
		0.0087	-8.98568e-11	-1.21681e-10	-8.92551e-10
		0.00872	-9.17289e-11	-1.18561e-10	-8.93178e-10
		0.00874	-9.04808e-11	-1.19809e-10	-8.93804e-10
		0.00876	-8.98568e-11	-1.19185e-10	-8.94431e-10
		0.00878	-9.04808e-11	-1.21057e-10	-8.93178e-10
		0.0088	-9.04808e-11	-1.21681e-10	-8.93178e-10
		0.00882	-9.04808e-11	-1.24801e-10	-8.93804e-10
		0.00884	-8.98568e-11	-1.25425e-10	-8.92551e-10
		0.00886	-8.98568e-11	-1.27297e-10	-8.91297e-10
		0.00888	-9.04808e-11	-1.27921e-10	-8.89417e-10
		0.0089	-8.98568e-11	-1.27297e-10	-8.90044e-10
		0.00892	-8.86088e-11	-1.27921e-10	-8.89417e-10
		0.00894	-8.98568e-11	-1.26673e-10	-8.88163e-10
		0.00896	-8.86088e-11	-1.26049e-10	-8.8879e-10
		0.00898	-9.11049e-11	-1.26049e-10	-8.89417e-10
		0.009	-9.17289e-11	-1.26673e-10	-8.90044e-10
		0.00902	-8.98568e-11	-1.26049e-10	-8.91297e-10
		0.00904	-9.04808e-11	-1.26049e-10	-8.90671e-10
		0.00906	-8.86088e-11	-1.24801e-10	-8.90671e-10
		0.00908	-8.92328e-11	-1.23553e-10	-8.91297e-10
		0.0091	-8.92328e-11	-1.23553e-10	-8.91297e-10
		0.00912	-8.86088e-11	-1.25425e-10	-8.93804e-10
		0.00914	-8.98568e-11	-1.24801e-10	-8.95058e-10
		0.00916	-9.17289e-11	-1.24177e-10	-8.96312e-10
		0.00918	-9.04808e-11	-1.23553e-10	-8.95058e-10
		0.0092	-9.04808e-11	-1.23553e-10	-8.96312e-10
		0.00922	-9.04808e-11	-1.22929e-10	-8.96312e-10
		0.00924	-8.73608e-11	-1.21681e-10	-8.93804e-10
		0.00926	-8.79848e-11	-1.21681e-10	-8.92551e-10
		0.00928	-8.92328e-11	-1.19809e-10	-8.91297e-10
		0.0093	-9.11049e-11	-1.18561e-10	-8.8879e-10
		0.00932	-9.04808e-11	-1.18561e-10	-8.86283e-10
		0.00934	-9.11049e-11	-1.16689e-10	-8.86283e-10
		0.00936	-9.17289e-11	-1.16065e-10	-8.86283e-10
		0.00938	-9.17289e-11	-1.17937e-10	-8.85029e-10
		0.0094	-9.17289e-11	-1.17313e-10	-8.8691e-10
		0.00942	-9.17289e-11	-1.18561e-10	-8.85029e-10
		0.00944	-9.17289e-11	-1.17937e-10	-8.8879e-10
		0.00946	-9.17289e-11	-1.18561e-10	-8.91297e-10
		0.00948	-9.17289e-11	-1.19809e-10	-8.93804e-10
		0.0095	-9.23529e-11	-1.21681e-10	-8.96938e-10
		0.00952	-9.23529e-11	-1.21057e-10	-8.96938e-10
		0.00954	-9.11049e-11	-1.22929e-10	-8.96312e-10
		0.00956	-9.17289e-11	-1.22929e-10	-8.95685e-10
		0.00958	-9.11049e-11	-1.23553e-10	-8.95058e-10
		0.0096	-9.17289e-11	-1.23553e-10	-8.93178e-10
		0.00962	-9.17289e-11	-1.24177e-10	-8.91924e-10
		0.00964	-9.04808e-11	-1.23553e-10	-8.91924e-10
		0.00966	-9.04808e-11	-1.22305e-10	-8.91297e-10
		0.00968	-9.11049e-11	-1.21057e-10	-8.90044e-10
		0.0097	-8.98568e-11	-1.21057e-10	-8.91297e-10
		0.00972	-8.98568e-11	-1.19809e-10	-8.89417e-10
		0.00974	-8.86088e-11	-1.20433e-10	-8.90044e-10
		0.00976	-8.92328e-11	-1.22305e-10	-8.90044e-10
		0.00978	-8.86088e-11	-1.22929e-10	-8.93178e-10
		0.0098	-8.86088e-11	-1.23553e-10	-8.93804e-10
		0.00982	-8.79848e-11	-1.26049e-10	-8.95058e-10
		0.00984	-8.86088e-11	-1.25425e-10	-8.95058e-10
		0.00986	-8.79848e-11	-1.26049e-10	-8.96312e-10
		0.00988	-8.92328e-11	-1.26673e-10	-8.96312e-10
		0.0099	-8.86088e-11	-1.27297e-10	-8.96312e-10
		0.00992	-8.92328e-11	-1.24801e-10	-8.96312e-10
		0.00994	-8.86088e-11	-1.25425e-10	-8.98192e-10
		0.00996	-8.92328e-11	-1.24177e-10	-9.00072e-10
		0.00998	-8.86088e-11	-1.24801e-10	-9.01953e-10
		0.01	-8.79848e-11	-1.25425e-10	-9.01953e-10
		0.01002	-8.86088e-11	-1.24801e-10	-9.01953e-10
		0.01004	-8.86088e-11	-1.23553e-10	-9.00072e-10
		0.01006	-8.79848e-11	-1.24177e-10	-9.01326e-10
		0.01008	-8.67368e-11	-1.24801e-10	-9.01326e-10
		0.0101	-8.61128e-11	-1.24177e-10	-9.00072e-10
		0.01012	-8.67368e-11	-1.24801e-10	-9.01953e-10
		0.01014	-8.61128e-11	-1.25425e-10	-9.03206e-10
		0.01016	-8.54888e-11	-1.25425e-10	-9.03833e-10
		0.01018	-8.61128e-11	-1.24177e-10	-9.03833e-10
		0.0102	-8.92328e-11	-1.22305e-10	-9.03206e-10
		0.01022	-9.11049e-11	-1.21681e-10	-9.0258e-10
		0.01024	-9.36009e-11	-1.20433e-10	-9.0258e-10
		0.01026	-9.23529e-11	-1.21057e-10	-9.00699e-10
		0.01028	-9.42249e-11	-1.18561e-10	-9.0258e-10
		0.0103	-9.42249e-11	-1.19185e-10	-9.0258e-10
		0.01032	-9.60969e-11	-1.21057e-10	-9.01326e-10
		0.01034	-9.54729e-11	-1.21057e-10	-8.98819e-10
		0.01036	-9.48489e-11	-1.20433e-10	-8.98192e-10
		0.01038	-9.60969e-11	-1.19809e-10	-8.97565e-10
		0.0104	-9.54729e-11	-1.19809e-10	-8.98192e-10
		0.01042	-9.36009e-11	-1.19185e-10	-8.98192e-10
		0.01044	-9.48489e-11	-1.18561e-10	-8.98192e-10
		0.01046	-9.29769e-11	-1.17937e-10	-9.00072e-10
		0.01048	-9.36009e-11	-1.19809e-10	-9.00072e-10
		0.0105	-9.11049e-11	-1.19809e-10	-9.01326e-10
		0.01052	-9.17289e-11	-1.20433e-10	-9.0258e-10
		0.01054	-9.23529e-11	-1.16689e-10	-9.01326e-10
		0.01056	-9.23529e-11	-1.16689e-10	-9.00699e-10
		0.01058	-9.36009e-11	-1.15441e-10	-8.98192e-10
		0.0106	-9.29769e-11	-1.16065e-10	-8.96938e-10
		0.01062	-9.36009e-11	-1.16689e-10	-8.96312e-10
		0.01064	-9.11049e-11	-1.19185e-10	-8.96938e-10
		0.01066	-9.04808e-11	-1.18561e-10	-8.96938e-10
		0.01068	-8.92328e-11	-1.17313e-10	-8.96312e-10
		0.0107	-8.98568e-11	-1.18561e-10	-8.97565e-10
		0.01072	-8.92328e-11	-1.17313e-10	-8.98192e-10
		0.01074	-8.98568e-11	-1.17313e-10	-8.95058e-10
		0.01076	-8.79848e-11	-1.16065e-10	-8.95058e-10
		0.01078	-8.79848e-11	-1.16689e-10	-8.95685e-10
		0.0108	-8.92328e-11	-1.18561e-10	-8.96938e-10
		0.01082	-8.79848e-11	-1.19185e-10	-8.98192e-10
		0.01084	-8.79848e-11	-1.19809e-10	-9.01326e-10
		0.01086	-8.61128e-11	-1.19809e-10	-9.00699e-10
		0.01088	-8.73608e-11	-1.20433e-10	-9.00699e-10
		0.0109	-8.54888e-11	-1.19185e-10	-9.01326e-10
		0.01092	-8.54888e-11	-1.20433e-10	-9.00072e-10
		0.01094	-8.61128e-11	-1.21681e-10	-9.01953e-10
		0.01096	-8.67368e-11	-1.22305e-10	-9.01953e-10
		0.01098	-8.61128e-11	-1.22929e-10	-9.03206e-10
		0.011	-8.86088e-11	-1.23553e-10	-9.01326e-10
		0.01102	-8.98568e-11	-1.21681e-10	-9.0258e-10
		0.01104	-8.98568e-11	-1.21681e-10	-9.01953e-10
		0.01106	-9.11049e-11	-1.20433e-10	-9.0258e-10
		0.01108	-9.11049e-11	-1.20433e-10	-9.01326e-10
		0.0111	-9.17289e-11	-1.20433e-10	-9.00072e-10
		0.01112	-9.17289e-11	-1.21057e-10	-8.98192e-10
		0.01114	-9.23529e-11	-1.20433e-10	-8.96312e-10
		0.01116	-9.04808e-11	-1.22305e-10	-8.96938e-10
		0.01118	-9.04808e-11	-1.22305e-10	-8.94431e-10
		0.0112	-8.98568e-11	-1.21057e-10	-8.96312e-10
		0.01122	-9.11049e-11	-1.20433e-10	-8.97565e-10
		0.01124	-9.04808e-11	-1.18561e-10	-8.98192e-10
		0.01126	-9.04808e-11	-1.17313e-10	-8.98192e-10
		0.01128	-9.17289e-11	-1.19185e-10	-8.97565e-10
		0.0113	-9.17289e-11	-1.18561e-10	-9.00072e-10
		0.01132	-9.29769e-11	-1.19809e-10	-8.99446e-10
		0.01134	-8.98568e-11	-1.21681e-10	-9.00072e-10
		0.01136	-9.11049e-11	-1.19809e-10	-8.99446e-10
		0.01138	-9.11049e-11	-1.21057e-10	-9.01953e-10
		0.0114	-9.04808e-11	-1.21681e-10	-9.0258e-10
		0.01142	-8.92328e-11	-1.22929e-10	-9.03833e-10
		0.01144	-8.79848e-11	-1.25425e-10	-9.0258e-10
		0.01146	-8.73608e-11	-1.24177e-10	-9.01326e-10
		0.01148	-8.86088e-11	-1.22305e-10	-9.00072e-10
		0.0115	-8.86088e-11	-1.23553e-10	-8.99446e-10
		0.01152	-8.86088e-11	-1.21681e-10	-8.96312e-10
		0.01154	-8.92328e-11	-1.21057e-10	-8.96312e-10
		0.01156	-8.98568e-11	-1.21057e-10	-8.95685e-10
		0.01158	-9.17289e-11	-1.21681e-10	-8.95685e-10
		0.0116	-8.98568e-11	-1.23553e-10	-8.95058e-10
		0.01162	-8.98568e-11	-1.25425e-10	-8.94431e-10
		0.01164	-9.04808e-11	-1.25425e-10	-8.93804e-10
		0.01166	-8.79848e-11	-1.24801e-10	-8.93804e-10
		0.01168	-8.79848e-11	-1.24801e-10	-8.93178e-10
		0.0117	-8.86088e-11	-1.25425e-10	-8.92551e-10
		0.01172	-8.86088e-11	-1.26673e-10	-8.94431e-10
		0.01174	-9.04808e-11	-1.29169e-10	-8.93178e-10
		0.01176	-8.98568e-11	-1.29169e-10	-8.94431e-10
		0.01178	-9.11049e-11	-1.30417e-10	-8.96312e-10
		0.0118	-9.17289e-11	-1.32289e-10	-8.95058e-10
		0.01182	-9.04808e-11	-1.31041e-10	-8.93178e-10
		0.01184	-8.98568e-11	-1.31041e-10	-8.91297e-10
		0.01186	-8.98568e-11	-1.29169e-10	-8.90044e-10
		0.01188	-8.73608e-11	-1.28545e-10	-8.86283e-10
		0.0119	-8.73608e-11	-1.24801e-10	-8.85029e-10
		0.01192	-8.73608e-11	-1.24801e-10	-8.83776e-10
		0.01194	-8.79848e-11	-1.22305e-10	-8.86283e-10
		0.01196	-8.86088e-11	-1.22305e-10	-8.8879e-10
		0.01198	-8.98568e-11	-1.22929e-10	-8.89417e-10
		0.012	-9.04808e-11	-1.21681e-10	-8.91924e-10
		0.01202	-8.98568e-11	-1.24177e-10	-8.94431e-10
		0.01204	-9.04808e-11	-1.22929e-10	-8.94431e-10
		0.01206	-8.92328e-11	-1.24801e-10	-8.94431e-10
		0.01208	-8.92328e-11	-1.26673e-10	-8.92551e-10
		0.0121	-8.73608e-11	-1.28545e-10	-8.92551e-10
		0.01212	-8.92328e-11	-1.30417e-10	-8.90671e-10
		0.01214	-8.79848e-11	-1.29169e-10	-8.91924e-10
		0.01216	-8.86088e-11	-1.29793e-10	-8.91297e-10
		0.01218	-8.79848e-11	-1.29169e-10	-8.91924e-10
		0.0122	-8.73608e-11	-1.26673e-10	-8.91297e-10
		0.01222	-8.73608e-11	-1.24177e-10	-8.90671e-10
		0.01224	-8.73608e-11	-1.22929e-10	-8.90044e-10
		0.01226	-8.86088e-11	-1.21681e-10	-8.90044e-10
		0.01228	-8.92328e-11	-1.21057e-10	-8.87537e-10
		0.0123	-9.04808e-11	-1.21681e-10	-8.87537e-10
		0.01232	-9.11049e-11	-1.21681e-10	-8.87537e-10
		0.01234	-9.04808e-11	-1.22929e-10	-8.87537e-10
		0.01236	-8.92328e-11	-1.24801e-10	-8.88163e-10
		0.01238	-8.92328e-11	-1.24177e-10	-8.8879e-10
		0.0124	-8.98568e-11	-1.24801e-10	-8.8879e-10
		0.01242	-8.92328e-11	-1.24801e-10	-8.90044e-10
		0.01244	-8.79848e-11	-1.25425e-10	-8.92551e-10
		0.01246	-8.73608e-11	-1.26049e-10	-8.93804e-10
		0.01248	-8.73608e-11	-1.27297e-10	-8.94431e-10
		0.0125	-8.67368e-11	-1.26049e-10	-8.96312e-10
		0.01252	-8.61128e-11	-1.25425e-10	-8.96312e-10
		0.01254	-8.42408e-11	-1.24801e-10	-8.96938e-10
		0.01256	-8.48648e-11	-1.26673e-10	-8.92551e-10
		0.01258	-8.42408e-11	-1.24801e-10	-8.89417e-10
		0.0126	-8.54888e-11	-1.26049e-10	-8.8879e-10
		0.01262	-8.67368e-11	-1.26049e-10	-8.87537e-10
		0.01264	-8.79848e-11	-1.25425e-10	-8.89417e-10
		0.01266	-8.98568e-11	-1.24801e-10	-8.87537e-10
		0.01268	-9.23529e-11	-1.25425e-10	-8.88163e-10
		0.0127	-9.11049e-11	-1.22305e-10	-8.8691e-10
		0.01272	-9.17289e-11	-1.22929e-10	-8.86283e-10
		0.01274	-8.98568e-11	-1.23553e-10	-8.85029e-10
		0.01276	-9.04808e-11	-1.23553e-10	-8.83149e-10
		0.01278	-8.98568e-11	-1.24801e-10	-8.83776e-10
		0.0128	-8.98568e-11	-1.26673e-10	-8.83149e-10
		0.01282	-8.86088e-11	-1.26673e-10	-8.83149e-10
		0.01284	-9.04808e-11	-1.26049e-10	-8.85656e-10
		0.01286	-8.92328e-11	-1.24177e-10	-8.86283e-10
		0.01288	-8.86088e-11	-1.22305e-10	-8.85029e-10
		0.0129	-8.86088e-11	-1.22305e-10	-8.85656e-10
		0.01292	-8.92328e-11	-1.22305e-10	-8.83776e-10
		0.01294	-8.98568e-11	-1.24801e-10	-8.84403e-10
		0.01296	-8.79848e-11	-1.25425e-10	-8.83149e-10
		0.01298	-8.86088e-11	-1.24801e-10	-8.83776e-10
		0.013	-8.92328e-11	-1.27297e-10	-8.84403e-10
		0.01302	-8.92328e-11	-1.26673e-10	-8.86283e-10
		0.01304	-8.92328e-11	-1.27297e-10	-8.8691e-10
		0.01306	-8.86088e-11	-1.26673e-10	-8.88163e-10
		0.01308	-8.79848e-11	-1.26049e-10	-8.89417e-10
		0.0131	-8.67368e-11	-1.26673e-10	-8.8879e-10
		0.01312	-8.79848e-11	-1.27297e-10	-8.89417e-10
		0.01314	-8.73608e-11	-1.27921e-10	-8.87537e-10
		0.01316	-8.61128e-11	-1.27921e-10	-8.90044e-10
		0.01318	-8.61128e-11	-1.29169e-10	-8.90044e-10
		0.0132	-8.67368e-11	-1.29793e-10	-8.90671e-10
		0.01322	-8.67368e-11	-1.30417e-10	-8.90671e-10
		0.01324	-8.54888e-11	-1.29793e-10	-8.90044e-10
		0.01326	-8.61128e-11	-1.28545e-10	-8.88163e-10
		0.01328	-8.67368e-11	-1.29793e-10	-8.85656e-10
		0.0133	-8.54888e-11	-1.30417e-10	-8.82522e-10
		0.01332	-8.67368e-11	-1.28545e-10	-8.82522e-10
		0.01334	-8.73608e-11	-1.28545e-10	-8.83149e-10
		0.01336	-8.54888e-11	-1.27921e-10	-8.85029e-10
		0.01338	-8.67368e-11	-1.27297e-10	-8.8691e-10
		0.0134	-8.79848e-11	-1.24801e-10	-8.87537e-10
		0.01342	-8.98568e-11	-1.24801e-10	-8.89417e-10
		0.01344	-9.17289e-11	-1.24177e-10	-8.91297e-10
		0.01346	-9.42249e-11	-1.23553e-10	-8.88163e-10
		0.01348	-9.73449e-11	-1.23553e-10	-8.87537e-10
		0.0135	-9.67209e-11	-1.22305e-10	-8.87537e-10
		0.01352	-9.60969e-11	-1.21057e-10	-8.87537e-10
		0.01354	-9.54729e-11	-1.21681e-10	-8.8691e-10
		0.01356	-9.42249e-11	-1.21681e-10	-8.8691e-10
		0.01358	-9.04808e-11	-1.22929e-10	-8.84403e-10
		0.0136	-9.04808e-11	-1.24801e-10	-8.85656e-10
		0.01362	-8.98568e-11	-1.26673e-10	-8.85029e-10
		0.01364	-8.98568e-11	-1.27297e-10	-8.85029e-10
		0.01366	-8.92328e-11	-1.28545e-10	-8.87537e-10
		0.01368	-8.86088e-11	-1.27297e-10	-8.87537e-10
		0.0137	-9.04808e-11	-1.26673e-10	-8.90044e-10
		0.01372	-9.11049e-11	-1.26049e-10	-8.8879e-10
		0.01374	-9.04808e-11	-1.26673e-10	-8.90044e-10
		0.01376	-9.04808e-11	-1.27297e-10	-8.89417e-10
		0.01378	-9.04808e-11	-1.29169e-10	-8.8879e-10
		0.0138	-8.86088e-11	-1.29793e-10	-8.88163e-10
		0.01382	-8.73608e-11	-1.29793e-10	-8.85656e-10
		0.01384	-8.73608e-11	-1.28545e-10	-8.88163e-10
		0.01386	-8.61128e-11	-1.25425e-10	-8.88163e-10
		0.01388	-8.67368e-11	-1.23553e-10	-8.87537e-10
		0.0139	-8.61128e-11	-1.21681e-10	-8.90044e-10
		0.01392	-8.73608e-11	-1.21681e-10	-8.91924e-10
		0.01394	-8.86088e-11	-1.23553e-10	-8.91924e-10
		0.01396	-8.79848e-11	-1.24801e-10	-8.93178e-10
		0.01398	-8.61128e-11	-1.24801e-10	-8.91297e-10
		0.014	-8.54888e-11	-1.22929e-10	-8.91924e-10
		0.01402	-8.61128e-11	-1.23553e-10	-8.91924e-10
		0.01404	-8.48648e-11	-1.22305e-10	-8.89417e-10
		0.01406	-8.54888e-11	-1.21681e-10	-8.88163e-10
		0.01408	-8.61128e-11	-1.24177e-10	-8.89417e-10
		0.0141	-8.48648e-11	-1.23553e-10	-8.90044e-10
		0.01412	-8.61128e-11	-1.24801e-10	-8.8879e-10
		0.01414	-8.67368e-11	-1.25425e-10	-8.89417e-10
		0.01416	-8.79848e-11	-1.26049e-10	-8.88163e-10
		0.01418	-8.79848e-11	-1.26049e-10	-8.88163e-10
		0.0142	-8.73608e-11	-1.26673e-10	-8.89417e-10
		0.01422	-8.79848e-11	-1.24801e-10	-8.8879e-10
		0.01424	-8.79848e-11	-1.23553e-10	-8.88163e-10
		0.01426	-8.73608e-11	-1.22929e-10	-8.89417e-10
		0.01428	-8.86088e-11	-1.21057e-10	-8.89417e-10
		0.0143	-8.92328e-11	-1.20433e-10	-8.87537e-10
		0.01432	-9.11049e-11	-1.21057e-10	-8.8691e-10
		0.01434	-9.23529e-11	-1.19809e-10	-8.87537e-10
		0.01436	-9.36009e-11	-1.18561e-10	-8.87537e-10
		0.01438	-9.36009e-11	-1.18561e-10	-8.8691e-10
		0.0144	-9.29769e-11	-1.17937e-10	-8.89417e-10
		0.01442	-9.17289e-11	-1.17937e-10	-8.89417e-10
		0.01444	-8.92328e-11	-1.17313e-10	-8.90044e-10
		0.01446	-8.92328e-11	-1.17313e-10	-8.91924e-10
		0.01448	-9.04808e-11	-1.17937e-10	-8.91924e-10
		0.0145	-9.11049e-11	-1.18561e-10	-8.91297e-10
		0.01452	-8.98568e-11	-1.21057e-10	-8.91297e-10
		0.01454	-8.86088e-11	-1.23553e-10	-8.89417e-10
		0.01456	-8.73608e-11	-1.24177e-10	-8.89417e-10
		0.01458	-8.61128e-11	-1.23553e-10	-8.90044e-10
		0.0146	-8.48648e-11	-1.24801e-10	-8.8879e-10
		0.01462	-8.42408e-11	-1.25425e-10	-8.90044e-10
		0.01464	-8.73608e-11	-1.26049e-10	-8.90671e-10
		0.01466	-8.67368e-11	-1.24801e-10	-8.91924e-10
		0.01468	-8.73608e-11	-1.25425e-10	-8.91297e-10
		0.0147	-8.67368e-11	-1.25425e-10	-8.91924e-10
		0.01472	-8.48648e-11	-1.26049e-10	-8.91297e-10
		0.01474	-8.23688e-11	-1.26673e-10	-8.91297e-10
		0.01476	-8.23688e-11	-1.26049e-10	-8.93178e-10
		0.01478	-8.36168e-11	-1.27921e-10	-8.93178e-10
		0.0148	-8.61128e-11	-1.26673e-10	-8.92551e-10
		0.01482	-8.98568e-11	-1.26673e-10	-8.91297e-10
		0.01484	-9.11049e-11	-1.25425e-10	-8.93178e-10
		0.01486	-8.98568e-11	-1.26049e-10	-8.90044e-10
		0.01488	-8.98568e-11	-1.25425e-10	-8.91924e-10
		0.0149	-8.79848e-11	-1.24801e-10	-8.90044e-10
		0.01492	-8.86088e-11	-1.26049e-10	-8.90044e-10
		0.01494	-8.79848e-11	-1.24177e-10	-8.90671e-10
		0.01496	-8.98568e-11	-1.25425e-10	-8.91297e-10
		0.01498	-8.98568e-11	-1.23553e-10	-8.91924e-10
		0.015	-9.11049e-11	-1.22305e-10	-8.92551e-10
		0.01502	-8.86088e-11	-1.20433e-10	-8.92551e-10
		0.01504	-8.73608e-11	-1.19185e-10	-8.93178e-10
		0.01506	-8.48648e-11	-1.18561e-10	-8.91924e-10
		0.01508	-8.42408e-11	-1.18561e-10	-8.91297e-10
		0.0151	-8.42408e-11	-1.18561e-10	-8.90044e-10
		0.01512	-8.42408e-11	-1.20433e-10	-8.90671e-10
		0.01514	-8.48648e-11	-1.21057e-10	-8.91297e-10
		0.01516	-8.61128e-11	-1.21681e-10	-8.90671e-10
		0.01518	-8.67368e-11	-1.19809e-10	-8.91297e-10
		0.0152	-8.61128e-11	-1.18561e-10	-8.90671e-10
		0.01522	-8.67368e-11	-1.17313e-10	-8.91297e-10
		0.01524	-8.67368e-11	-1.16065e-10	-8.91297e-10
		0.01526	-8.79848e-11	-1.17313e-10	-8.91297e-10
		0.01528	-8.98568e-11	-1.17937e-10	-8.90671e-10
		0.0153	-9.04808e-11	-1.20433e-10	-8.90671e-10
		0.01532	-8.86088e-11	-1.21057e-10	-8.90044e-10
		0.01534	-8.98568e-11	-1.19809e-10	-8.90044e-10
		0.01536	-8.92328e-11	-1.20433e-10	-8.90044e-10
		0.01538	-8.79848e-11	-1.19185e-10	-8.8879e-10
		0.0154	-8.79848e-11	-1.19185e-10	-8.89417e-10
		0.01542	-8.86088e-11	-1.19185e-10	-8.87537e-10
		0.01544	-8.67368e-11	-1.18561e-10	-8.8691e-10
		0.01546	-8.73608e-11	-1.21057e-10	-8.85656e-10
		0.01548	-8.73608e-11	-1.21057e-10	-8.86283e-10
		0.0155	-8.92328e-11	-1.21681e-10	-8.85656e-10
		0.01552	-8.86088e-11	-1.21681e-10	-8.86283e-10
		0.01554	-8.73608e-11	-1.21057e-10	-8.83776e-10
		0.01556	-8.73608e-11	-1.19185e-10	-8.85029e-10
		0.01558	-8.67368e-11	-1.18561e-10	-8.85029e-10
		0.0156	-8.61128e-11	-1.17937e-10	-8.83776e-10
		0.01562	-8.48648e-11	-1.17313e-10	-8.84403e-10
		0.01564	-8.36168e-11	-1.18561e-10	-8.84403e-10
		0.01566	-8.48648e-11	-1.19809e-10	-8.82522e-10
		0.01568	-8.48648e-11	-1.21057e-10	-8.83776e-10
		0.0157	-8.48648e-11	-1.21681e-10	-8.83149e-10
		0.01572	-8.36168e-11	-1.22305e-10	-8.82522e-10
		0.01574	-8.54888e-11	-1.23553e-10	-8.82522e-10
		0.01576	-8.36168e-11	-1.23553e-10	-8.84403e-10
		0.01578	-8.54888e-11	-1.23553e-10	-8.85029e-10
		0.0158	-8.61128e-11	-1.25425e-10	-8.86283e-10
		0.01582	-8.73608e-11	-1.25425e-10	-8.86283e-10
		0.01584	-8.92328e-11	-1.27297e-10	-8.84403e-10
		0.01586	-8.98568e-11	-1.25425e-10	-8.83149e-10
		0.01588	-8.92328e-11	-1.25425e-10	-8.83149e-10
		0.0159	-8.92328e-11	-1.26049e-10	-8.81269e-10
		0.01592	-8.73608e-11	-1.26049e-10	-8.81269e-10
		0.01594	-8.67368e-11	-1.25425e-10	-8.80642e-10
		0.01596	-8.67368e-11	-1.27297e-10	-8.80015e-10
		0.01598	-8.54888e-11	-1.27297e-10	-8.79388e-10
		0.016	-8.67368e-11	-1.27921e-10	-8.80015e-10
		0.01602	-8.48648e-11	-1.27297e-10	-8.81895e-10
		0.01604	-8.36168e-11	-1.27297e-10	-8.83149e-10
		0.01606	-8.29928e-11	-1.26673e-10	-8.84403e-10
		0.01608	-8.48648e-11	-1.26673e-10	-8.86283e-10
		0.0161	-8.36168e-11	-1.27921e-10	-8.86283e-10
		0.01612	-8.54888e-11	-1.27297e-10	-8.88163e-10
		0.01614	-8.67368e-11	-1.26673e-10	-8.8879e-10
		0.01616	-8.73608e-11	-1.26049e-10	-8.89417e-10
		0.01618	-8.98568e-11	-1.26049e-10	-8.8879e-10
		0.0162	-9.11049e-11	-1.25425e-10	-8.87537e-10
		0.01622	-9.11049e-11	-1.23553e-10	-8.88163e-10
		0.01624	-9.23529e-11	-1.21681e-10	-8.85656e-10
		0.01626	-9.23529e-11	-1.21681e-10	-8.85656e-10
		0.01628	-9.42249e-11	-1.20433e-10	-8.85656e-10
		0.0163	-9.36009e-11	-1.21681e-10	-8.83149e-10
		0.01632	-9.23529e-11	-1.22305e-10	-8.80642e-10
		0.01634	-9.29769e-11	-1.23553e-10	-8.80642e-10
		0.01636	-9.04808e-11	-1.24801e-10	-8.83149e-10
		0.01638	-8.98568e-11	-1.25425e-10	-8.84403e-10
		0.0164	-8.98568e-11	-1.26673e-10	-8.82522e-10
		0.01642	-9.04808e-11	-1.25425e-10	-8.82522e-10
		0.01644	-9.04808e-11	-1.27297e-10	-8.81895e-10
		0.01646	-9.42249e-11	-1.28545e-10	-8.81895e-10
		0.01648	-9.48489e-11	-1.28545e-10	-8.81895e-10
		0.0165	-9.42249e-11	-1.30417e-10	-8.82522e-10
		0.01652	-9.73449e-11	-1.30417e-10	-8.84403e-10
		0.01654	-9.60969e-11	-1.29793e-10	-8.85029e-10
		0.01656	-9.54729e-11	-1.28545e-10	-8.87537e-10
		0.01658	-9.36009e-11	-1.27297e-10	-8.8691e-10
		0.0166	-9.11049e-11	-1.27921e-10	-8.8879e-10
		0.01662	-9.04808e-11	-1.28545e-10	-8.90044e-10
		0.01664	-8.98568e-11	-1.28545e-10	-8.90671e-10
		0.01666	-8.67368e-11	-1.26673e-10	-8.90671e-10
		0.01668	-8.61128e-11	-1.26673e-10	-8.91297e-10
		0.0167	-8.61128e-11	-1.24177e-10	-8.8879e-10
		0.01672	-8.67368e-11	-1.24177e-10	-8.88163e-10
		0.01674	-8.29928e-11	-1.25425e-10	-8.88163e-10
		0.01676	-8.36168e-11	-1.26673e-10	-8.8691e-10
		0.01678	-8.54888e-11	-1.26673e-10	-8.8691e-10
		0.0168	-8.42408e-11	-1.27297e-10	-8.86283e-10
		0.01682	-8.61128e-11	-1.28545e-10	-8.85656e-10
		0.01684	-8.79848e-11	-1.29793e-10	-8.84403e-10
		0.01686	-8.73608e-11	-1.29793e-10	-8.81895e-10
		0.01688	-8.61128e-11	-1.30417e-10	-8.81269e-10
		0.0169	-8.61128e-11	-1.29169e-10	-8.81269e-10
		0.01692	-8.54888e-11	-1.29169e-10	-8.81269e-10
		0.01694	-8.61128e-11	-1.28545e-10	-8.83149e-10
		0.01696	-8.67368e-11	-1.29793e-10	-8.85029e-10
		0.01698	-9.11049e-11	-1.29793e-10	-8.84403e-10
		0.017	-9.11049e-11	-1.30417e-10	-8.83149e-10
		0.01702	-9.23529e-11	-1.31041e-10	-8.84403e-10
		0.01704	-9.29769e-11	-1.31665e-10	-8.83776e-10
		0.01706	-9.29769e-11	-1.31041e-10	-8.86283e-10
		0.01708	-9.11049e-11	-1.29169e-10	-8.88163e-10
		0.0171	-9.11049e-11	-1.28545e-10	-8.89417e-10
		0.01712	-9.29769e-11	-1.28545e-10	-8.8879e-10
		0.01714	-9.17289e-11	-1.29169e-10	-8.88163e-10
		0.01716	-9.29769e-11	-1.29169e-10	-8.86283e-10
		0.01718	-9.36009e-11	-1.30417e-10	-8.84403e-10
		0.0172	-9.17289e-11	-1.29793e-10	-8.87537e-10
		0.01722	-8.92328e-11	-1.28545e-10	-8.86283e-10
		0.01724	-8.73608e-11	-1.27921e-10	-8.8691e-10
		0.01726	-8.61128e-11	-1.27921e-10	-8.87537e-10
		0.01728	-8.54888e-11	-1.27921e-10	-8.89417e-10
		0.0173	-8.48648e-11	-1.27921e-10	-8.89417e-10
		0.01732	-8.67368e-11	-1.29169e-10	-8.8879e-10
		0.01734	-8.61128e-11	-1.29169e-10	-8.87537e-10
		0.01736	-8.61128e-11	-1.30417e-10	-8.87537e-10
		0.01738	-8.54888e-11	-1.31041e-10	-8.89417e-10
		0.0174	-8.29928e-11	-1.30417e-10	-8.90671e-10
		0.01742	-8.36168e-11	-1.31041e-10	-8.90671e-10
		0.01744	-8.23688e-11	-1.31665e-10	-8.91924e-10
		0.01746	-8.48648e-11	-1.31665e-10	-8.93178e-10
		0.01748	-8.86088e-11	-1.31665e-10	-8.91924e-10
		0.0175	-9.04808e-11	-1.33537e-10	-8.90671e-10
		0.01752	-9.04808e-11	-1.32289e-10	-8.8879e-10
		0.01754	-9.29769e-11	-1.32913e-10	-8.87537e-10
		0.01756	-9.23529e-11	-1.33537e-10	-8.83776e-10
		0.01758	-9.04808e-11	-1.31041e-10	-8.84403e-10
		0.0176	-8.92328e-11	-1.31665e-10	-8.83149e-10
		0.01762	-8.86088e-11	-1.28545e-10	-8.85029e-10
		0.01764	-8.73608e-11	-1.28545e-10	-8.85029e-10
		0.01766	-8.98568e-11	-1.27921e-10	-8.85029e-10
		0.01768	-9.04808e-11	-1.28545e-10	-8.84403e-10
		0.0177	-9.23529e-11	-1.26673e-10	-8.81895e-10
		0.01772	-9.36009e-11	-1.24801e-10	-8.81895e-10
		0.01774	-9.23529e-11	-1.25425e-10	-8.82522e-10
		0.01776	-9.23529e-11	-1.24177e-10	-8.83149e-10
		0.01778	-9.17289e-11	-1.23553e-10	-8.83776e-10
		0.0178	-9.11049e-11	-1.23553e-10	-8.87537e-10
		0.01782	-9.11049e-11	-1.24801e-10	-8.86283e-10
		0.01784	-8.98568e-11	-1.27297e-10	-8.89417e-10
		0.01786	-8.98568e-11	-1.27297e-10	-8.8879e-10
		0.01788	-8.79848e-11	-1.27921e-10	-8.8879e-10
		0.0179	-8.86088e-11	-1.28545e-10	-8.87537e-10
		0.01792	-8.86088e-11	-1.29169e-10	-8.88163e-10
		0.01794	-8.79848e-11	-1.29169e-10	-8.8879e-10
		0.01796	-8.86088e-11	-1.30417e-10	-8.89417e-10
		0.01798	-8.92328e-11	-1.31665e-10	-8.8879e-10
		0.018	-8.98568e-11	-1.32289e-10	-8.89417e-10
		0.01802	-8.86088e-11	-1.31041e-10	-8.8879e-10
		0.01804	-8.73608e-11	-1.29793e-10	-8.88163e-10
		0.01806	-8.67368e-11	-1.30417e-10	-8.86283e-10
		0.01808	-8.61128e-11	-1.28545e-10	-8.84403e-10
		0.0181	-8.61128e-11	-1.27297e-10	-8.83776e-10
		0.01812	-8.73608e-11	-1.26673e-10	-8.86283e-10
		0.01814	-8.86088e-11	-1.26049e-10	-8.86283e-10
		0.01816	-9.23529e-11	-1.27297e-10	-8.88163e-10
		0.01818	-9.17289e-11	-1.25425e-10	-8.87537e-10
		0.0182	-9.23529e-11	-1.25425e-10	-8.88163e-10
		0.01822	-9.17289e-11	-1.27297e-10	-8.87537e-10
		0.01824	-9.04808e-11	-1.26673e-10	-8.88163e-10
		0.01826	-9.04808e-11	-1.25425e-10	-8.90044e-10
		0.01828	-8.73608e-11	-1.27297e-10	-8.88163e-10
		0.0183	-8.73608e-11	-1.27297e-10	-8.87537e-10
		0.01832	-8.92328e-11	-1.28545e-10	-8.89417e-10
		0.01834	-8.73608e-11	-1.30417e-10	-8.88163e-10
		0.01836	-8.73608e-11	-1.30417e-10	-8.8691e-10
		0.01838	-8.79848e-11	-1.31665e-10	-8.89417e-10
		0.0184	-8.86088e-11	-1.32289e-10	-8.91297e-10
		0.01842	-9.11049e-11	-1.31665e-10	-8.92551e-10
		0.01844	-8.98568e-11	-1.31041e-10	-8.94431e-10
		0.01846	-9.17289e-11	-1.31041e-10	-8.95058e-10
		0.01848	-9.17289e-11	-1.31041e-10	-8.95685e-10
		0.0185	-9.04808e-11	-1.31665e-10	-8.96938e-10
		0.01852	-9.04808e-11	-1.31665e-10	-8.95685e-10
		0.01854	-8.92328e-11	-1.31041e-10	-8.95685e-10
		0.01856	-8.79848e-11	-1.30417e-10	-8.94431e-10
		0.01858	-8.73608e-11	-1.29169e-10	-8.94431e-10
		0.0186	-8.92328e-11	-1.30417e-10	-8.92551e-10
		0.01862	-8.86088e-11	-1.31041e-10	-8.93178e-10
		0.01864	-9.04808e-11	-1.31665e-10	-8.92551e-10
		0.01866	-9.04808e-11	-1.30417e-10	-8.92551e-10
		0.01868	-8.92328e-11	-1.30417e-10	-8.91297e-10
		0.0187	-8.79848e-11	-1.31665e-10	-8.90044e-10
		0.01872	-8.73608e-11	-1.32289e-10	-8.90671e-10
		0.01874	-8.73608e-11	-1.33537e-10	-8.91297e-10
		0.01876	-8.73608e-11	-1.34161e-10	-8.90044e-10
		0.01878	-8.61128e-11	-1.35409e-10	-8.90044e-10
		0.0188	-8.73608e-11	-1.35409e-10	-8.8879e-10
		0.01882	-8.92328e-11	-1.35409e-10	-8.90044e-10
		0.01884	-8.98568e-11	-1.36033e-10	-8.91297e-10
		0.01886	-9.11049e-11	-1.36657e-10	-8.92551e-10
		0.01888	-9.11049e-11	-1.33537e-10	-8.92551e-10
		0.0189	-9.29769e-11	-1.31041e-10	-8.93804e-10
		0.01892	-9.23529e-11	-1.30417e-10	-8.93804e-10
		0.01894	-9.04808e-11	-1.29793e-10	-8.93178e-10
		0.01896	-8.98568e-11	-1.31041e-10	-8.93804e-10
		0.01898	-9.04808e-11	-1.32913e-10	-8.94431e-10
		0.019	-9.04808e-11	-1.32289e-10	-8.95058e-10
		0.01902	-8.98568e-11	-1.32913e-10	-8.91924e-10
		0.01904	-9.04808e-11	-1.31665e-10	-8.91297e-10
		0.01906	-8.98568e-11	-1.30417e-10	-8.91297e-10
		0.01908	-9.04808e-11	-1.30417e-10	-8.90044e-10
		0.0191	-9.11049e-11	-1.31665e-10	-8.91924e-10
		0.01912	-9.36009e-11	-1.35409e-10	-8.91924e-10
		0.01914	-9.42249e-11	-1.36033e-10	-8.90671e-10
		0.01916	-9.42249e-11	-1.38529e-10	-8.91297e-10
		0.01918	-9.42249e-11	-1.38529e-10	-8.89417e-10
		0.0192	-9.36009e-11	-1.37905e-10	-8.90044e-10
		0.01922	-8.98568e-11	-1.37281e-10	-8.87537e-10
		0.01924	-8.98568e-11	-1.36033e-10	-8.89417e-10
		0.01926	-8.86088e-11	-1.35409e-10	-8.90044e-10
		0.01928	-8.73608e-11	-1.34785e-10	-8.90044e-10
		0.0193	-8.79848e-11	-1.34785e-10	-8.89417e-10
		0.01932	-8.79848e-11	-1.32913e-10	-8.90044e-10
		0.01934	-8.79848e-11	-1.31665e-10	-8.8879e-10
		0.01936	-8.86088e-11	-1.29793e-10	-8.89417e-10
		0.01938	-8.86088e-11	-1.27921e-10	-8.89417e-10
		0.0194	-8.73608e-11	-1.26673e-10	-8.90044e-10
		0.01942	-8.79848e-11	-1.26049e-10	-8.91297e-10
		0.01944	-8.98568e-11	-1.27297e-10	-8.89417e-10
		0.01946	-9.04808e-11	-1.25425e-10	-8.89417e-10
		0.01948	-9.17289e-11	-1.26673e-10	-8.90044e-10
		0.0195	-9.29769e-11	-1.25425e-10	-8.90044e-10
		0.01952	-9.36009e-11	-1.22929e-10	-8.90671e-10
		0.01954	-9.17289e-11	-1.22305e-10	-8.91297e-10
		0.01956	-9.04808e-11	-1.22305e-10	-8.91924e-10
		0.01958	-9.04808e-11	-1.22305e-10	-8.93804e-10
		0.0196	-8.86088e-11	-1.22305e-10	-8.93178e-10
		0.01962	-8.86088e-11	-1.22929e-10	-8.91924e-10
		0.01964	-8.73608e-11	-1.23553e-10	-8.91297e-10
		0.01966	-8.79848e-11	-1.24801e-10	-8.92551e-10
		0.01968	-8.79848e-11	-1.24801e-10	-8.93178e-10
		0.0197	-8.92328e-11	-1.24177e-10	-8.93178e-10
		0.01972	-8.79848e-11	-1.24177e-10	-8.95058e-10
		0.01974	-8.73608e-11	-1.25425e-10	-8.96312e-10
		0.01976	-8.86088e-11	-1.26049e-10	-8.95685e-10
		0.01978	-8.73608e-11	-1.26673e-10	-8.93804e-10
		0.0198	-8.92328e-11	-1.26673e-10	-8.93178e-10
		0.01982	-8.92328e-11	-1.27297e-10	-8.93178e-10
		0.01984	-8.98568e-11	-1.26049e-10	-8.91297e-10
		0.01986	-9.04808e-11	-1.24801e-10	-8.91924e-10
		0.01988	-8.92328e-11	-1.24177e-10	-8.90671e-10
		0.0199	-8.98568e-11	-1.24177e-10	-8.8879e-10
		0.01992	-8.92328e-11	-1.24801e-10	-8.91297e-10
		0.01994	-9.04808e-11	-1.25425e-10	-8.91297e-10
		0.01996	-8.86088e-11	-1.27297e-10	-8.91924e-10
		0.01998	-9.11049e-11	-1.26673e-10	-8.91297e-10
		0.02	-9.42249e-11	-1.26673e-10	-8.90044e-10
		0.02002	-9.54729e-11	-1.26049e-10	-8.8879e-10
		0.02004	-9.60969e-11	-1.26049e-10	-8.88163e-10
		0.02006	-9.42249e-11	-1.26049e-10	-8.88163e-10
		0.02008	-9.42249e-11	-1.25425e-10	-8.87537e-10
		0.0201	-9.04808e-11	-1.26049e-10	-8.88163e-10
		0.02012	-8.98568e-11	-1.26673e-10	-8.8879e-10
		0.02014	-8.79848e-11	-1.28545e-10	-8.88163e-10
		0.02016	-8.73608e-11	-1.27297e-10	-8.88163e-10
		0.02018	-8.67368e-11	-1.27297e-10	-8.88163e-10
		0.0202	-8.67368e-11	-1.26673e-10	-8.8691e-10
		0.02022	-8.67368e-11	-1.26673e-10	-8.87537e-10
		0.02024	-8.54888e-11	-1.25425e-10	-8.90671e-10
		0.02026	-8.54888e-11	-1.26049e-10	-8.91297e-10
		0.02028	-8.73608e-11	-1.27297e-10	-8.92551e-10
		0.0203	-8.73608e-11	-1.27297e-10	-8.94431e-10
		0.02032	-8.86088e-11	-1.26673e-10	-8.94431e-10
		0.02034	-9.11049e-11	-1.26049e-10	-8.94431e-10
		0.02036	-9.36009e-11	-1.26673e-10	-8.91924e-10
		0.02038	-9.36009e-11	-1.26049e-10	-8.91924e-10
		0.0204	-9.42249e-11	-1.25425e-10	-8.91924e-10
		0.02042	-9.17289e-11	-1.26673e-10	-8.93178e-10
		0.02044	-9.11049e-11	-1.26049e-10	-8.95058e-10
		0.02046	-8.98568e-11	-1.28545e-10	-8.95058e-10
		0.02048	-8.86088e-11	-1.27297e-10	-8.95058e-10
		0.0205	-8.92328e-11	-1.29169e-10	-8.96312e-10
		0.02052	-9.11049e-11	-1.27297e-10	-8.92551e-10
		0.02054	-9.11049e-11	-1.25425e-10	-8.90671e-10
		0.02056	-9.17289e-11	-1.24801e-10	-8.91297e-10
		0.02058	-9.29769e-11	-1.24177e-10	-8.91297e-10
		0.0206	-9.42249e-11	-1.24801e-10	-8.90671e-10
		0.02062	-9.36009e-11	-1.26049e-10	-8.90671e-10
		0.02064	-9.23529e-11	-1.27921e-10	-8.93178e-10
		0.02066	-9.36009e-11	-1.27297e-10	-8.93178e-10
		0.02068	-9.36009e-11	-1.26673e-10	-8.95685e-10
		0.0207	-9.23529e-11	-1.26673e-10	-8.96938e-10
		0.02072	-9.04808e-11	-1.24177e-10	-8.96938e-10
		0.02074	-8.86088e-11	-1.23553e-10	-8.98819e-10
		0.02076	-8.86088e-11	-1.25425e-10	-8.98192e-10
		0.02078	-8.79848e-11	-1.26049e-10	-8.95685e-10
		0.0208	-8.92328e-11	-1.27297e-10	-8.95058e-10
		0.02082	-9.04808e-11	-1.28545e-10	-8.93804e-10
		0.02084	-9.04808e-11	-1.29169e-10	-8.93178e-10
		0.02086	-9.29769e-11	-1.31041e-10	-8.91924e-10
		0.02088	-9.17289e-11	-1.28545e-10	-8.91297e-10
		0.0209	-9.11049e-11	-1.31665e-10	-8.90671e-10
		0.02092	-9.11049e-11	-1.30417e-10	-8.91297e-10
		0.02094	-9.04808e-11	-1.31665e-10	-8.91924e-10
		0.02096	-9.17289e-11	-1.31665e-10	-8.90044e-10
		0.02098	-9.23529e-11	-1.32289e-10	-8.90671e-10
		0.021	-9.17289e-11	-1.30417e-10	-8.91297e-10
		0.02102	-9.36009e-11	-1.29169e-10	-8.91297e-10
		0.02104	-9.48489e-11	-1.28545e-10	-8.91297e-10
		0.02106	-9.54729e-11	-1.26049e-10	-8.91924e-10
		0.02108	-9.42249e-11	-1.27921e-10	-8.91924e-10
		0.0211	-9.54729e-11	-1.28545e-10	-8.95685e-10
		0.02112	-9.48489e-11	-1.29169e-10	-8.95685e-10
		0.02114	-9.60969e-11	-1.29793e-10	-8.96312e-10
		0.02116	-9.48489e-11	-1.29169e-10	-8.94431e-10
		0.02118	-9.54729e-11	-1.31041e-10	-8.93178e-10
		0.0212	-9.29769e-11	-1.31041e-10	-8.92551e-10
		0.02122	-9.17289e-11	-1.29793e-10	-8.91297e-10
		0.02124	-8.98568e-11	-1.28545e-10	-8.91297e-10
		0.02126	-8.92328e-11	-1.28545e-10	-8.93178e-10
		0.02128	-8.86088e-11	-1.28545e-10	-8.93804e-10
		0.0213	-9.04808e-11	-1.31665e-10	-8.93178e-10
		0.02132	-9.23529e-11	-1.33537e-10	-8.93178e-10
		0.02134	-9.42249e-11	-1.34785e-10	-8.92551e-10
		0.02136	-9.42249e-11	-1.36657e-10	-8.91297e-10
		0.02138	-9.48489e-11	-1.37281e-10	-8.90671e-10
		0.0214	-9.60969e-11	-1.34785e-10	-8.91924e-10
		0.02142	-9.42249e-11	-1.34161e-10	-8.92551e-10
		0.02144	-9.42249e-11	-1.33537e-10	-8.95685e-10
		0.02146	-9.23529e-11	-1.32289e-10	-8.96312e-10
		0.02148	-9.29769e-11	-1.31665e-10	-8.94431e-10
		0.0215	-9.17289e-11	-1.32289e-10	-8.93804e-10
		0.02152	-9.42249e-11	-1.32289e-10	-8.91924e-10
		0.02154	-9.54729e-11	-1.31665e-10	-8.92551e-10
		0.02156	-9.60969e-11	-1.32289e-10	-8.91297e-10
		0.02158	-9.60969e-11	-1.32289e-10	-8.90671e-10
		0.0216	-9.73449e-11	-1.31041e-10	-8.91924e-10
		0.02162	-9.60969e-11	-1.31041e-10	-8.91297e-10
		0.02164	-9.42249e-11	-1.31041e-10	-8.91297e-10
		0.02166	-9.42249e-11	-1.31041e-10	-8.90671e-10
		0.02168	-9.17289e-11	-1.29169e-10	-8.8879e-10
		0.0217	-8.98568e-11	-1.28545e-10	-8.90044e-10
		0.02172	-9.11049e-11	-1.29169e-10	-8.8879e-10
		0.02174	-8.92328e-11	-1.27921e-10	-8.8879e-10
		0.02176	-8.98568e-11	-1.30417e-10	-8.89417e-10
		0.02178	-8.92328e-11	-1.31041e-10	-8.91297e-10
		0.0218	-8.92328e-11	-1.32913e-10	-8.91297e-10
		0.02182	-8.98568e-11	-1.31665e-10	-8.90671e-10
		0.02184	-9.04808e-11	-1.32913e-10	-8.91297e-10
		0.02186	-9.17289e-11	-1.34161e-10	-8.90671e-10
		0.02188	-9.11049e-11	-1.34785e-10	-8.8879e-10
		0.0219	-9.17289e-11	-1.34161e-10	-8.8879e-10
		0.02192	-9.04808e-11	-1.32289e-10	-8.87537e-10
		0.02194	-9.17289e-11	-1.32913e-10	-8.89417e-10
		0.02196	-9.04808e-11	-1.32913e-10	-8.8879e-10
		0.02198	-8.92328e-11	-1.33537e-10	-8.93178e-10
		0.022	-8.86088e-11	-1.34785e-10	-8.94431e-10
		0.02202	-8.86088e-11	-1.34161e-10	-8.95058e-10
		0.02204	-8.86088e-11	-1.34161e-10	-8.95058e-10
		0.02206	-8.73608e-11	-1.32289e-10	-8.93804e-10
		0.02208	-8.79848e-11	-1.32289e-10	-8.93178e-10
		0.0221	-8.73608e-11	-1.31041e-10	-8.91297e-10
		0.02212	-8.61128e-11	-1.29169e-10	-8.89417e-10
		0.02214	-8.67368e-11	-1.29169e-10	-8.87537e-10
		0.02216	-8.86088e-11	-1.29169e-10	-8.87537e-10
		0.02218	-9.17289e-11	-1.27921e-10	-8.8691e-10
		0.0222	-9.48489e-11	-1.26049e-10	-8.8879e-10
		0.02222	-9.36009e-11	-1.24177e-10	-8.8879e-10
		0.02224	-9.48489e-11	-1.23553e-10	-8.88163e-10
		0.02226	-9.42249e-11	-1.25425e-10	-8.90044e-10
		0.02228	-9.54729e-11	-1.26049e-10	-8.90044e-10
		0.0223	-9.36009e-11	-1.26673e-10	-8.90044e-10
		0.02232	-9.36009e-11	-1.27921e-10	-8.89417e-10
		0.02234	-9.36009e-11	-1.27297e-10	-8.88163e-10
		0.02236	-9.17289e-11	-1.27921e-10	-8.8691e-10
		0.02238	-9.11049e-11	-1.28545e-10	-8.84403e-10
		0.0224	-9.23529e-11	-1.27297e-10	-8.83149e-10
		0.02242	-9.42249e-11	-1.26673e-10	-8.82522e-10
		0.02244	-9.42249e-11	-1.27921e-10	-8.85029e-10
		0.02246	-9.54729e-11	-1.27921e-10	-8.87537e-10
		0.02248	-9.67209e-11	-1.28545e-10	-8.85029e-10
		0.0225	-9.67209e-11	-1.28545e-10	-8.83776e-10
		0.02252	-9.42249e-11	-1.29169e-10	-8.84403e-10
		0.02254	-9.23529e-11	-1.28545e-10	-8.8691e-10
		0.02256	-9.23529e-11	-1.28545e-10	-8.86283e-10
		0.02258	-9.17289e-11	-1.27921e-10	-8.88163e-10
		0.0226	-9.23529e-11	-1.26673e-10	-8.90671e-10
		0.02262	-9.17289e-11	-1.26049e-10	-8.93804e-10
		0.02264	-9.23529e-11	-1.26049e-10	-8.93178e-10
		0.02266	-9.23529e-11	-1.26673e-10	-8.93178e-10
		0.02268	-9.17289e-11	-1.27921e-10	-8.91924e-10
		0.0227	-9.04808e-11	-1.27297e-10	-8.89417e-10
		0.02272	-8.98568e-11	-1.27297e-10	-8.87537e-10
		0.02274	-8.86088e-11	-1.28545e-10	-8.85029e-10
		0.02276	-8.86088e-11	-1.27921e-10	-8.83149e-10
		0.02278	-8.92328e-11	-1.28545e-10	-8.82522e-10
		0.0228	-9.17289e-11	-1.27921e-10	-8.83149e-10
		0.02282	-9.23529e-11	-1.27297e-10	-8.84403e-10
		0.02284	-9.17289e-11	-1.26673e-10	-8.84403e-10
		0.02286	-9.04808e-11	-1.26673e-10	-8.84403e-10
		0.02288	-9.11049e-11	-1.25425e-10	-8.83776e-10
		0.0229	-8.86088e-11	-1.27297e-10	-8.83149e-10
		0.02292	-8.79848e-11	-1.27297e-10	-8.81895e-10
		0.02294	-8.73608e-11	-1.29793e-10	-8.83776e-10
		0.02296	-8.92328e-11	-1.30417e-10	-8.86283e-10
		0.02298	-8.92328e-11	-1.30417e-10	-8.88163e-10
		0.023	-9.17289e-11	-1.31041e-10	-8.89417e-10
		0.02302	-9.29769e-11	-1.27921e-10	-8.8879e-10
		0.02304	-9.29769e-11	-1.25425e-10	-8.88163e-10
		0.02306	-9.29769e-11	-1.21057e-10	-8.88163e-10
		0.02308	-9.23529e-11	-1.21681e-10	-8.8691e-10
		0.0231	-9.36009e-11	-1.20433e-10	-8.86283e-10
		0.02312	-9.54729e-11	-1.21681e-10	-8.8691e-10
		0.02314	-9.60969e-11	-1.21681e-10	-8.8691e-10
		0.02316	-9.60969e-11	-1.23553e-10	-8.86283e-10
		0.02318	-9.48489e-11	-1.26673e-10	-8.8879e-10
		0.0232	-9.54729e-11	-1.28545e-10	-8.89417e-10
		0.02322	-9.36009e-11	-1.29169e-10	-8.90044e-10
		0.02324	-9.17289e-11	-1.29793e-10	-8.90671e-10
		0.02326	-9.04808e-11	-1.30417e-10	-8.91924e-10
		0.02328	-9.11049e-11	-1.30417e-10	-8.90671e-10
		0.0233	-9.17289e-11	-1.32289e-10	-8.89417e-10
		0.02332	-9.23529e-11	-1.29793e-10	-8.8879e-10
		0.02334	-9.23529e-11	-1.29793e-10	-8.8879e-10
		0.02336	-9.17289e-11	-1.27297e-10	-8.8879e-10
		0.02338	-9.17289e-11	-1.27297e-10	-8.8879e-10
		0.0234	-9.04808e-11	-1.28545e-10	-8.88163e-10
		0.02342	-9.04808e-11	-1.29169e-10	-8.88163e-10
		0.02344	-9.04808e-11	-1.31041e-10	-8.8691e-10
		0.02346	-9.11049e-11	-1.32913e-10	-8.8691e-10
		0.02348	-9.11049e-11	-1.31665e-10	-8.85029e-10
		0.0235	-9.11049e-11	-1.32289e-10	-8.85029e-10
		0.02352	-9.04808e-11	-1.31665e-10	-8.84403e-10
		0.02354	-8.92328e-11	-1.31665e-10	-8.83149e-10
		0.02356	-8.86088e-11	-1.30417e-10	-8.85029e-10
		0.02358	-8.92328e-11	-1.30417e-10	-8.84403e-10
		0.0236	-9.11049e-11	-1.29169e-10	-8.85029e-10
		0.02362	-9.23529e-11	-1.27921e-10	-8.85029e-10
		0.02364	-9.54729e-11	-1.29169e-10	-8.83776e-10
		0.02366	-9.73449e-11	-1.29169e-10	-8.83149e-10
		0.02368	-9.73449e-11	-1.28545e-10	-8.81895e-10
		0.0237	-9.98409e-11	-1.29169e-10	-8.82522e-10
		0.02372	-9.92169e-11	-1.31041e-10	-8.82522e-10
		0.02374	-9.73449e-11	-1.29793e-10	-8.82522e-10
		0.02376	-9.42249e-11	-1.31041e-10	-8.81269e-10
		0.02378	-9.04808e-11	-1.30417e-10	-8.82522e-10
		0.0238	-8.92328e-11	-1.29169e-10	-8.83776e-10
		0.02382	-8.92328e-11	-1.29169e-10	-8.83149e-10
		0.02384	-8.73608e-11	-1.28545e-10	-8.83149e-10
		0.02386	-8.98568e-11	-1.26049e-10	-8.83149e-10
		0.02388	-8.98568e-11	-1.24801e-10	-8.83776e-10
		0.0239	-9.29769e-11	-1.25425e-10	-8.81895e-10
		0.02392	-9.04808e-11	-1.25425e-10	-8.82522e-10
		0.02394	-9.04808e-11	-1.24177e-10	-8.81895e-10
		0.02396	-8.92328e-11	-1.26049e-10	-8.83149e-10
		0.02398	-8.92328e-11	-1.26673e-10	-8.83149e-10
		0.024	-9.11049e-11	-1.29169e-10	-8.83149e-10
		0.02402	-8.92328e-11	-1.28545e-10	-8.84403e-10
		0.02404	-9.11049e-11	-1.29169e-10	-8.81895e-10
		0.02406	-9.17289e-11	-1.27297e-10	-8.83149e-10
		0.02408	-9.29769e-11	-1.24801e-10	-8.84403e-10
		0.0241	-9.42249e-11	-1.25425e-10	-8.84403e-10
		0.02412	-9.48489e-11	-1.24177e-10	-8.85656e-10
		0.02414	-9.60969e-11	-1.25425e-10	-8.84403e-10
		0.02416	-9.54729e-11	-1.26049e-10	-8.84403e-10
		0.02418	-9.48489e-11	-1.26049e-10	-8.84403e-10
		0.0242	-9.42249e-11	-1.26049e-10	-8.83149e-10
		0.02422	-9.48489e-11	-1.25425e-10	-8.85029e-10
		0.02424	-9.42249e-11	-1.25425e-10	-8.8691e-10
		0.02426	-9.36009e-11	-1.27297e-10	-8.90044e-10
		0.02428	-9.73449e-11	-1.28545e-10	-8.8879e-10
		0.0243	-9.85929e-11	-1.28545e-10	-8.88163e-10
		0.02432	-9.92169e-11	-1.29169e-10	-8.8691e-10
		0.02434	-9.79689e-11	-1.28545e-10	-8.84403e-10
		0.02436	-9.79689e-11	-1.27921e-10	-8.85029e-10
		0.02438	-9.60969e-11	-1.25425e-10	-8.86283e-10
		0.0244	-9.79689e-11	-1.23553e-10	-8.8691e-10
		0.02442	-9.79689e-11	-1.22305e-10	-8.85656e-10
		0.02444	-9.79689e-11	-1.23553e-10	-8.85656e-10
		0.02446	-9.67209e-11	-1.21681e-10	-8.8691e-10
		0.02448	-9.60969e-11	-1.23553e-10	-8.8691e-10
		0.0245	-9.60969e-11	-1.22929e-10	-8.8879e-10
		0.02452	-9.36009e-11	-1.22929e-10	-8.90671e-10
		0.02454	-9.17289e-11	-1.21681e-10	-8.90671e-10
		0.02456	-9.04808e-11	-1.19809e-10	-8.91297e-10
		0.02458	-9.11049e-11	-1.22305e-10	-8.91924e-10
		0.0246	-9.11049e-11	-1.22929e-10	-8.90044e-10
		0.02462	-8.86088e-11	-1.23553e-10	-8.89417e-10
		0.02464	-8.86088e-11	-1.23553e-10	-8.89417e-10
		0.02466	-8.73608e-11	-1.22305e-10	-8.89417e-10
		0.02468	-8.73608e-11	-1.22305e-10	-8.8879e-10
		0.0247	-8.61128e-11	-1.22929e-10	-8.8879e-10
		0.02472	-8.48648e-11	-1.22305e-10	-8.8879e-10
		0.02474	-8.67368e-11	-1.22305e-10	-8.87537e-10
		0.02476	-8.79848e-11	-1.24177e-10	-8.8691e-10
		0.02478	-8.79848e-11	-1.24177e-10	-8.85656e-10
		0.0248	-8.73608e-11	-1.25425e-10	-8.83149e-10
		0.02482	-8.79848e-11	-1.24801e-10	-8.85656e-10
		0.02484	-8.79848e-11	-1.24801e-10	-8.85029e-10
		0.02486	-8.98568e-11	-1.24801e-10	-8.84403e-10
		0.02488	-8.98568e-11	-1.23553e-10	-8.84403e-10
		0.0249	-9.29769e-11	-1.21057e-10	-8.84403e-10
		0.02492	-9.42249e-11	-1.22305e-10	-8.85029e-10
		0.02494	-9.67209e-11	-1.22305e-10	-8.8691e-10
		0.02496	-9.73449e-11	-1.21681e-10	-8.87537e-10
		0.02498	-9.60969e-11	-1.22305e-10	-8.8691e-10
		0.025	-9.48489e-11	-1.22305e-10	-8.8691e-10
		0.02502	-9.36009e-11	-1.21681e-10	-8.8691e-10
		0.02504	-9.17289e-11	-1.20433e-10	-8.88163e-10
		0.02506	-9.11049e-11	-1.20433e-10	-8.87537e-10
		0.02508	-9.04808e-11	-1.19809e-10	-8.8691e-10
		0.0251	-9.23529e-11	-1.20433e-10	-8.85029e-10
		0.02512	-9.42249e-11	-1.23553e-10	-8.83149e-10
		0.02514	-9.54729e-11	-1.21681e-10	-8.84403e-10
		0.02516	-9.60969e-11	-1.26049e-10	-8.84403e-10
		0.02518	-9.67209e-11	-1.26049e-10	-8.83149e-10
		0.0252	-9.67209e-11	-1.26049e-10	-8.81895e-10
		0.02522	-9.48489e-11	-1.24177e-10	-8.81269e-10
		0.02524	-9.48489e-11	-1.22305e-10	-8.81269e-10
		0.02526	-9.23529e-11	-1.22305e-10	-8.85029e-10
		0.02528	-8.98568e-11	-1.21681e-10	-8.85029e-10
		0.0253	-8.73608e-11	-1.21057e-10	-8.88163e-10
		0.02532	-8.79848e-11	-1.21057e-10	-8.89417e-10
		0.02534	-8.67368e-11	-1.20433e-10	-8.89417e-10
		0.02536	-8.79848e-11	-1.19809e-10	-8.88163e-10
		0.02538	-8.79848e-11	-1.21057e-10	-8.85029e-10
		0.0254	-8.86088e-11	-1.23553e-10	-8.83149e-10
		0.02542	-8.79848e-11	-1.24177e-10	-8.81895e-10
		0.02544	-8.98568e-11	-1.26049e-10	-8.81269e-10
		0.02546	-9.04808e-11	-1.27297e-10	-8.80642e-10
		0.02548	-9.11049e-11	-1.28545e-10	-8.82522e-10
		0.0255	-9.11049e-11	-1.27297e-10	-8.81269e-10
		0.02552	-9.11049e-11	-1.28545e-10	-8.80642e-10
		0.02554	-9.04808e-11	-1.27921e-10	-8.79388e-10
		0.02556	-9.29769e-11	-1.27297e-10	-8.79388e-10
		0.02558	-9.29769e-11	-1.25425e-10	-8.78762e-10
		0.0256	-9.48489e-11	-1.26049e-10	-8.77508e-10
		0.02562	-9.48489e-11	-1.27297e-10	-8.75628e-10
		0.02564	-9.42249e-11	-1.26049e-10	-8.75001e-10
		0.02566	-9.17289e-11	-1.25425e-10	-8.76881e-10
		0.02568	-9.04808e-11	-1.23553e-10	-8.78135e-10
		0.0257	-8.98568e-11	-1.24801e-10	-8.80015e-10
		0.02572	-8.73608e-11	-1.21681e-10	-8.80015e-10
		0.02574	-8.79848e-11	-1.21681e-10	-8.83149e-10
		0.02576	-8.73608e-11	-1.21057e-10	-8.81895e-10
		0.02578	-8.79848e-11	-1.22305e-10	-8.81269e-10
		0.0258	-8.86088e-11	-1.22929e-10	-8.80015e-10
		0.02582	-9.04808e-11	-1.21681e-10	-8.80015e-10
		0.02584	-9.11049e-11	-1.21681e-10	-8.80642e-10
		0.02586	-9.04808e-11	-1.20433e-10	-8.80015e-10
		0.02588	-9.04808e-11	-1.18561e-10	-8.83776e-10
		0.0259	-9.17289e-11	-1.17937e-10	-8.84403e-10
		0.02592	-9.29769e-11	-1.16689e-10	-8.87537e-10
		0.02594	-9.42249e-11	-1.15441e-10	-8.8691e-10
		0.02596	-9.48489e-11	-1.16689e-10	-8.8691e-10
		0.02598	-9.54729e-11	-1.16065e-10	-8.8879e-10
		0.026	-9.73449e-11	-1.15441e-10	-8.88163e-10
		0.02602	-9.67209e-11	-1.16065e-10	-8.8691e-10
		0.02604	-9.48489e-11	-1.17313e-10	-8.85656e-10
		0.02606	-9.23529e-11	-1.17937e-10	-8.83149e-10
		0.02608	-9.17289e-11	-1.19185e-10	-8.83776e-10
		0.0261	-9.17289e-11	-1.19185e-10	-8.82522e-10
		0.02612	-9.42249e-11	-1.17937e-10	-8.81269e-10
		0.02614	-9.23529e-11	-1.18561e-10	-8.79388e-10
		0.02616	-9.36009e-11	-1.19185e-10	-8.78135e-10
		0.02618	-9.36009e-11	-1.18561e-10	-8.78762e-10
		0.0262	-9.42249e-11	-1.19185e-10	-8.79388e-10
		0.02622	-9.42249e-11	-1.19809e-10	-8.77508e-10
		0.02624	-9.23529e-11	-1.19809e-10	-8.79388e-10
		0.02626	-9.23529e-11	-1.19809e-10	-8.81269e-10
		0.02628	-9.54729e-11	-1.20433e-10	-8.80015e-10
		0.0263	-9.36009e-11	-1.19809e-10	-8.82522e-10
		0.02632	-9.42249e-11	-1.20433e-10	-8.81895e-10
		0.02634	-9.23529e-11	-1.19809e-10	-8.81269e-10
		0.02636	-9.17289e-11	-1.20433e-10	-8.81269e-10
		0.02638	-9.17289e-11	-1.19809e-10	-8.81269e-10
		0.0264	-8.98568e-11	-1.19185e-10	-8.81269e-10
		0.02642	-8.98568e-11	-1.19809e-10	-8.82522e-10
		0.02644	-8.92328e-11	-1.20433e-10	-8.81269e-10
		0.02646	-9.04808e-11	-1.21681e-10	-8.83149e-10
		0.02648	-9.11049e-11	-1.22305e-10	-8.81895e-10
		0.0265	-9.17289e-11	-1.21057e-10	-8.81269e-10
		0.02652	-9.11049e-11	-1.23553e-10	-8.82522e-10
		0.02654	-8.92328e-11	-1.21681e-10	-8.82522e-10
		0.02656	-8.79848e-11	-1.21057e-10	-8.81895e-10
		0.02658	-8.73608e-11	-1.20433e-10	-8.83776e-10
		0.0266	-8.67368e-11	-1.20433e-10	-8.85029e-10
		0.02662	-8.48648e-11	-1.22305e-10	-8.83776e-10
		0.02664	-8.61128e-11	-1.24801e-10	-8.85029e-10
		0.02666	-8.79848e-11	-1.25425e-10	-8.85029e-10
		0.02668	-8.92328e-11	-1.26049e-10	-8.85029e-10
		0.0267	-8.86088e-11	-1.23553e-10	-8.83776e-10
		0.02672	-8.98568e-11	-1.22305e-10	-8.84403e-10
		0.02674	-9.04808e-11	-1.19809e-10	-8.85029e-10
		0.02676	-9.04808e-11	-1.18561e-10	-8.83776e-10
		0.02678	-9.29769e-11	-1.19809e-10	-8.85029e-10
		0.0268	-9.42249e-11	-1.21057e-10	-8.83149e-10
		0.02682	-9.29769e-11	-1.21057e-10	-8.83149e-10
		0.02684	-9.17289e-11	-1.22929e-10	-8.82522e-10
		0.02686	-8.98568e-11	-1.21681e-10	-8.81269e-10
		0.02688	-8.92328e-11	-1.22305e-10	-8.83149e-10
		0.0269	-8.86088e-11	-1.22929e-10	-8.84403e-10
		0.02692	-8.92328e-11	-1.22929e-10	-8.83149e-10
		0.02694	-8.79848e-11	-1.23553e-10	-8.82522e-10
		0.02696	-8.92328e-11	-1.21057e-10	-8.81269e-10
		0.02698	-9.11049e-11	-1.20433e-10	-8.79388e-10
		0.027	-9.17289e-11	-1.18561e-10	-8.76881e-10
		0.02702	-9.17289e-11	-1.18561e-10	-8.78135e-10
		0.02704	-9.36009e-11	-1.17937e-10	-8.78135e-10
		0.02706	-9.36009e-11	-1.19809e-10	-8.78762e-10
		0.02708	-9.42249e-11	-1.21681e-10	-8.79388e-10
		0.0271	-9.48489e-11	-1.22305e-10	-8.81269e-10
		0.02712	-9.42249e-11	-1.24801e-10	-8.83776e-10
		0.02714	-9.36009e-11	-1.25425e-10	-8.82522e-10
		0.02716	-9.42249e-11	-1.27921e-10	-8.82522e-10
		0.02718	-9.23529e-11	-1.26049e-10	-8.80642e-10
		0.0272	-9.29769e-11	-1.26049e-10	-8.78762e-10
		0.02722	-9.23529e-11	-1.24177e-10	-8.78762e-10
		0.02724	-9.42249e-11	-1.26049e-10	-8.78135e-10
		0.02726	-9.36009e-11	-1.24801e-10	-8.80015e-10
		0.02728	-9.48489e-11	-1.25425e-10	-8.79388e-10
		0.0273	-9.48489e-11	-1.26049e-10	-8.78762e-10
		0.02732	-9.48489e-11	-1.27921e-10	-8.78135e-10
		0.02734	-9.23529e-11	-1.26049e-10	-8.76254e-10
		0.02736	-9.04808e-11	-1.26673e-10	-8.77508e-10
		0.02738	-8.86088e-11	-1.21681e-10	-8.75628e-10
		0.0274	-8.92328e-11	-1.21057e-10	-8.75001e-10
		0.02742	-8.73608e-11	-1.20433e-10	-8.75001e-10
		0.02744	-8.86088e-11	-1.20433e-10	-8.73747e-10
		0.02746	-8.98568e-11	-1.23553e-10	-8.75001e-10
		0.02748	-8.98568e-11	-1.23553e-10	-8.75628e-10
		0.0275	-8.98568e-11	-1.26049e-10	-8.75001e-10
		0.02752	-8.86088e-11	-1.26673e-10	-8.75001e-10
		0.02754	-8.86088e-11	-1.26673e-10	-8.76254e-10
		0.02756	-8.67368e-11	-1.26673e-10	-8.76254e-10
		0.02758	-8.79848e-11	-1.26049e-10	-8.78135e-10
		0.0276	-8.86088e-11	-1.27297e-10	-8.80015e-10
		0.02762	-8.86088e-11	-1.28545e-10	-8.81895e-10
		0.02764	-9.04808e-11	-1.29169e-10	-8.83149e-10
		0.02766	-8.92328e-11	-1.29169e-10	-8.83776e-10
		0.02768	-9.04808e-11	-1.29793e-10	-8.83149e-10
		0.0277	-8.92328e-11	-1.29169e-10	-8.82522e-10
		0.02772	-8.92328e-11	-1.27921e-10	-8.82522e-10
		0.02774	-8.73608e-11	-1.28545e-10	-8.81269e-10
		0.02776	-8.79848e-11	-1.27921e-10	-8.82522e-10
		0.02778	-8.73608e-11	-1.26673e-10	-8.81895e-10
		0.0278	-8.92328e-11	-1.26673e-10	-8.82522e-10
		0.02782	-8.98568e-11	-1.26049e-10	-8.83149e-10
		0.02784	-8.98568e-11	-1.25425e-10	-8.82522e-10
		0.02786	-8.98568e-11	-1.25425e-10	-8.83776e-10
		0.02788	-9.04808e-11	-1.22929e-10	-8.85029e-10
		0.0279	-8.98568e-11	-1.23553e-10	-8.86283e-10
		0.02792	-9.04808e-11	-1.21057e-10	-8.85656e-10
		0.02794	-8.98568e-11	-1.21057e-10	-8.83776e-10
		0.02796	-9.11049e-11	-1.21057e-10	-8.81269e-10
		0.02798	-9.23529e-11	-1.20433e-10	-8.80642e-10
		0.028	-9.23529e-11	-1.21681e-10	-8.78762e-10
		0.02802	-9.04808e-11	-1.20433e-10	-8.78762e-10
		0.02804	-9.11049e-11	-1.22929e-10	-8.78762e-10
		0.02806	-9.23529e-11	-1.21681e-10	-8.77508e-10
		0.02808	-9.23529e-11	-1.23553e-10	-8.78135e-10
		0.0281	-9.17289e-11	-1.24801e-10	-8.76881e-10
		0.02812	-9.17289e-11	-1.24177e-10	-8.78135e-10
		0.02814	-9.17289e-11	-1.25425e-10	-8.76254e-10
		0.02816	-9.23529e-11	-1.24801e-10	-8.80642e-10
		0.02818	-9.17289e-11	-1.26049e-10	-8.83149e-10
		0.0282	-9.04808e-11	-1.26049e-10	-8.83776e-10
		0.02822	-9.04808e-11	-1.27297e-10	-8.87537e-10
		0.02824	-9.04808e-11	-1.26673e-10	-8.87537e-10
		0.02826	-9.04808e-11	-1.26049e-10	-8.88163e-10
		0.02828	-9.23529e-11	-1.26049e-10	-8.8879e-10
		0.0283	-9.54729e-11	-1.27297e-10	-8.88163e-10
		0.02832	-9.54729e-11	-1.26049e-10	-8.8691e-10
		0.02834	-9.54729e-11	-1.24801e-10	-8.85656e-10
		0.02836	-9.42249e-11	-1.22929e-10	-8.83776e-10
		0.02838	-9.23529e-11	-1.24177e-10	-8.85029e-10
		0.0284	-9.36009e-11	-1.22305e-10	-8.82522e-10
		0.02842	-9.42249e-11	-1.22929e-10	-8.81269e-10
		0.02844	-9.48489e-11	-1.23553e-10	-8.79388e-10
		0.02846	-9.48489e-11	-1.24801e-10	-8.78135e-10
		0.02848	-9.36009e-11	-1.26049e-10	-8.76881e-10
		0.0285	-9.11049e-11	-1.25425e-10	-8.77508e-10
		0.02852	-9.04808e-11	-1.24801e-10	-8.78135e-10
		0.02854	-8.73608e-11	-1.24801e-10	-8.77508e-10
		0.02856	-8.67368e-11	-1.24177e-10	-8.78135e-10
		0.02858	-8.67368e-11	-1.21681e-10	-8.80642e-10
		0.0286	-8.67368e-11	-1.21681e-10	-8.82522e-10
		0.02862	-9.04808e-11	-1.22305e-10	-8.82522e-10
		0.02864	-9.11049e-11	-1.25425e-10	-8.83149e-10
		0.02866	-9.54729e-11	-1.23553e-10	-8.83149e-10
		0.02868	-9.54729e-11	-1.23553e-10	-8.85029e-10
		0.0287	-9.54729e-11	-1.22305e-10	-8.85029e-10
		0.02872	-9.36009e-11	-1.22305e-10	-8.8691e-10
		0.02874	-9.23529e-11	-1.20433e-10	-8.86283e-10
		0.02876	-9.11049e-11	-1.21057e-10	-8.8691e-10
		0.02878	-8.98568e-11	-1.21057e-10	-8.86283e-10
		0.0288	-8.92328e-11	-1.22305e-10	-8.83149e-10
		0.02882	-8.86088e-11	-1.21057e-10	-8.83776e-10
		0.02884	-8.86088e-11	-1.20433e-10	-8.85029e-10
		0.02886	-8.79848e-11	-1.18561e-10	-8.86283e-10
		0.02888	-8.61128e-11	-1.17937e-10	-8.86283e-10
		0.0289	-8.79848e-11	-1.17313e-10	-8.8691e-10
		0.02892	-8.67368e-11	-1.17937e-10	-8.8691e-10
		0.02894	-8.86088e-11	-1.19185e-10	-8.88163e-10
		0.02896	-9.04808e-11	-1.21057e-10	-8.86283e-10
		0.02898	-8.98568e-11	-1.21057e-10	-8.86283e-10
		0.029	-9.04808e-11	-1.23553e-10	-8.85029e-10
		0.02902	-8.98568e-11	-1.21057e-10	-8.83776e-10
		0.02904	-8.86088e-11	-1.22305e-10	-8.83149e-10
		0.02906	-8.79848e-11	-1.21057e-10	-8.80642e-10
		0.02908	-8.61128e-11	-1.21681e-10	-8.78762e-10
		0.0291	-8.79848e-11	-1.21681e-10	-8.80642e-10
		0.02912	-8.92328e-11	-1.22929e-10	-8.80015e-10
		0.02914	-9.11049e-11	-1.24801e-10	-8.80642e-10
		0.02916	-9.17289e-11	-1.24801e-10	-8.81269e-10
		0.02918	-9.23529e-11	-1.24801e-10	-8.80015e-10
		0.0292	-8.98568e-11	-1.24801e-10	-8.80642e-10
		0.02922	-8.92328e-11	-1.24801e-10	-8.78762e-10
		0.02924	-8.54888e-11	-1.24801e-10	-8.76254e-10
		0.02926	-8.36168e-11	-1.26049e-10	-8.76881e-10
		0.02928	-8.36168e-11	-1.26673e-10	-8.75001e-10
		0.0293	-8.54888e-11	-1.28545e-10	-8.76254e-10
		0.02932	-8.86088e-11	-1.26673e-10	-8.77508e-10
		0.02934	-8.98568e-11	-1.26673e-10	-8.78762e-10
		0.02936	-9.23529e-11	-1.25425e-10	-8.79388e-10
		0.02938	-9.04808e-11	-1.22929e-10	-8.80642e-10
		0.0294	-9.04808e-11	-1.22305e-10	-8.80642e-10
		0.02942	-9.11049e-11	-1.20433e-10	-8.81269e-10
		0.02944	-8.86088e-11	-1.21681e-10	-8.81895e-10
		0.02946	-8.86088e-11	-1.20433e-10	-8.82522e-10
		0.02948	-8.98568e-11	-1.21057e-10	-8.81895e-10
		0.0295	-9.04808e-11	-1.20433e-10	-8.79388e-10
		0.02952	-9.04808e-11	-1.20433e-10	-8.78135e-10
		0.02954	-8.92328e-11	-1.20433e-10	-8.76254e-10
		0.02956	-8.73608e-11	-1.21681e-10	-8.76254e-10
		0.02958	-8.79848e-11	-1.20433e-10	-8.76254e-10
		0.0296	-8.86088e-11	-1.23553e-10	-8.77508e-10
		0.02962	-8.61128e-11	-1.24177e-10	-8.80015e-10
		0.02964	-8.67368e-11	-1.24801e-10	-8.82522e-10
		0.02966	-8.79848e-11	-1.24801e-10	-8.83149e-10
		0.02968	-8.79848e-11	-1.24177e-10	-8.84403e-10
		0.0297	-8.86088e-11	-1.22929e-10	-8.85029e-10
		0.02972	-8.79848e-11	-1.20433e-10	-8.83149e-10
		0.02974	-8.79848e-11	-1.21057e-10	-8.83776e-10
		0.02976	-8.79848e-11	-1.21057e-10	-8.83149e-10
		0.02978	-8.73608e-11	-1.22305e-10	-8.84403e-10
		0.0298	-8.79848e-11	-1.22305e-10	-8.85029e-10
		0.02982	-8.61128e-11	-1.24177e-10	-8.84403e-10
		0.02984	-8.67368e-11	-1.24177e-10	-8.85029e-10
		0.02986	-8.61128e-11	-1.22305e-10	-8.84403e-10
		0.02988	-8.54888e-11	-1.21681e-10	-8.83776e-10
		0.0299	-8.54888e-11	-1.22305e-10	-8.82522e-10
		0.02992	-8.36168e-11	-1.22305e-10	-8.82522e-10
		0.02994	-8.48648e-11	-1.21681e-10	-8.80642e-10
		0.02996	-8.61128e-11	-1.23553e-10	-8.79388e-10
		0.02998	-8.61128e-11	-1.24801e-10	-8.79388e-10
		0.03	-8.61128e-11	-1.22929e-10	-8.78762e-10
		0.03002	-8.86088e-11	-1.22929e-10	-8.80015e-10
		0.03004	-8.79848e-11	-1.22305e-10	-8.80642e-10
		0.03006	-8.79848e-11	-1.22305e-10	-8.80015e-10
		0.03008	-8.73608e-11	-1.22305e-10	-8.82522e-10
		0.0301	-8.73608e-11	-1.22929e-10	-8.81895e-10
		0.03012	-8.79848e-11	-1.24801e-10	-8.81895e-10
		0.03014	-8.86088e-11	-1.24801e-10	-8.81895e-10
		0.03016	-8.92328e-11	-1.24801e-10	-8.80015e-10
		0.03018	-8.92328e-11	-1.23553e-10	-8.81895e-10
		0.0302	-8.98568e-11	-1.23553e-10	-8.81269e-10
		0.03022	-9.17289e-11	-1.21681e-10	-8.80642e-10
		0.03024	-9.11049e-11	-1.22929e-10	-8.80642e-10
		0.03026	-9.23529e-11	-1.24177e-10	-8.82522e-10
		0.03028	-9.23529e-11	-1.22929e-10	-8.83776e-10
		0.0303	-9.29769e-11	-1.24177e-10	-8.83776e-10
		0.03032	-9.11049e-11	-1.25425e-10	-8.85656e-10
		0.03034	-9.23529e-11	-1.22929e-10	-8.8691e-10
		0.03036	-9.11049e-11	-1.21057e-10	-8.8691e-10
		0.03038	-8.98568e-11	-1.21057e-10	-8.84403e-10
		0.0304	-9.04808e-11	-1.18561e-10	-8.82522e-10
		0.03042	-9.04808e-11	-1.18561e-10	-8.82522e-10
		0.03044	-8.98568e-11	-1.19809e-10	-8.80642e-10
		0.03046	-8.92328e-11	-1.20433e-10	-8.80015e-10
		0.03048	-8.92328e-11	-1.19809e-10	-8.81269e-10
		0.0305	-8.92328e-11	-1.21681e-10	-8.80642e-10
		0.03052	-8.86088e-11	-1.20433e-10	-8.80015e-10
		0.03054	-8.92328e-11	-1.22929e-10	-8.81269e-10
		0.03056	-8.98568e-11	-1.22305e-10	-8.80015e-10
		0.03058	-8.86088e-11	-1.22305e-10	-8.82522e-10
		0.0306	-8.92328e-11	-1.22929e-10	-8.83149e-10
		0.03062	-8.98568e-11	-1.23553e-10	-8.80642e-10
		0.03064	-9.04808e-11	-1.24801e-10	-8.80642e-10
		0.03066	-9.17289e-11	-1.26049e-10	-8.78135e-10
		0.03068	-8.98568e-11	-1.26673e-10	-8.78762e-10
		0.0307	-9.04808e-11	-1.24801e-10	-8.78762e-10
		0.03072	-8.86088e-11	-1.23553e-10	-8.79388e-10
		0.03074	-8.92328e-11	-1.22929e-10	-8.80642e-10
		0.03076	-8.86088e-11	-1.24801e-10	-8.80642e-10
		0.03078	-9.04808e-11	-1.24177e-10	-8.80642e-10
		0.0308	-9.42249e-11	-1.26049e-10	-8.80642e-10
		0.03082	-1.02337e-10	-1.27297e-10	-8.80015e-10
		0.03084	-1.12321e-10	-1.27297e-10	-8.80015e-10
		0.03086	-1.27297e-10	-1.27921e-10	-8.77508e-10
		0.03088	-1.44145e-10	-1.28545e-10	-8.78762e-10
		0.0309	-1.57873e-10	-1.27921e-10	-8.76881e-10
		0.03092	-1.71602e-10	-1.30417e-10	-8.78762e-10
		0.03094	-1.85954e-10	-1.31665e-10	-8.78135e-10
		0.03096	-1.93442e-10	-1.31665e-10	-8.80015e-10
		0.03098	-2.01554e-10	-1.31041e-10	-8.78762e-10
		0.031	-2.06546e-10	-1.32289e-10	-8.81269e-10
		0.03102	-2.0717e-10	-1.29793e-10	-8.81269e-10
		0.03104	-2.07794e-10	-1.29793e-10	-8.79388e-10
		0.03106	-2.0405e-10	-1.26673e-10	-8.80015e-10
		0.03108	-1.98434e-10	-1.26049e-10	-8.81269e-10
		0.0311	-1.92818e-10	-1.24801e-10	-8.78762e-10
		0.03112	-1.84706e-10	-1.27921e-10	-8.79388e-10
		0.03114	-1.77842e-10	-1.29169e-10	-8.77508e-10
		0.03116	-1.6973e-10	-1.31041e-10	-8.78135e-10
		0.03118	-1.65362e-10	-1.32289e-10	-8.78762e-10
		0.0312	-1.58497e-10	-1.33537e-10	-8.78135e-10
		0.03122	-1.52257e-10	-1.34161e-10	-8.77508e-10
		0.03124	-1.47889e-10	-1.34785e-10	-8.78762e-10
		0.03126	-1.42273e-10	-1.34785e-10	-8.80642e-10
		0.03128	-1.35409e-10	-1.32289e-10	-8.80642e-10
		0.0313	-1.31041e-10	-1.31041e-10	-8.79388e-10
		0.03132	-1.27297e-10	-1.29793e-10	-8.80015e-10
		0.03134	-1.22305e-10	-1.28545e-10	-8.82522e-10
		0.03136	-1.19809e-10	-1.28545e-10	-8.82522e-10
		0.03138	-1.16065e-10	-1.27921e-10	-8.82522e-10
		0.0314	-1.14193e-10	-1.29169e-10	-8.83776e-10
		0.03142	-1.11697e-10	-1.30417e-10	-8.81269e-10
		0.03144	-1.10449e-10	-1.31665e-10	-8.81269e-10
		0.03146	-1.07953e-10	-1.32913e-10	-8.80015e-10
		0.03148	-1.08577e-10	-1.33537e-10	-8.80642e-10
		0.0315	-1.06081e-10	-1.31665e-10	-8.79388e-10
		0.03152	-1.04209e-10	-1.30417e-10	-8.81269e-10
		0.03154	-1.01713e-10	-1.30417e-10	-8.83149e-10
		0.03156	-9.98409e-11	-1.30417e-10	-8.82522e-10
		0.03158	-9.98409e-11	-1.28545e-10	-8.84403e-10
		0.0316	-9.85929e-11	-1.29169e-10	-8.85029e-10
		0.03162	-9.92169e-11	-1.28545e-10	-8.85029e-10
		0.03164	-9.98409e-11	-1.30417e-10	-8.85656e-10
		0.03166	-1.00465e-10	-1.30417e-10	-8.85656e-10
		0.03168	-9.92169e-11	-1.30417e-10	-8.83149e-10
		0.0317	-9.98409e-11	-1.28545e-10	-8.82522e-10
		0.03172	-9.85929e-11	-1.29169e-10	-8.82522e-10
		0.03174	-9.85929e-11	-1.29169e-10	-8.80642e-10
		0.03176	-9.92169e-11	-1.29169e-10	-8.81269e-10
		0.03178	-9.92169e-11	-1.31041e-10	-8.79388e-10
		0.0318	-9.85929e-11	-1.31041e-10	-8.79388e-10
		0.03182	-9.79689e-11	-1.32289e-10	-8.80642e-10
		0.03184	-9.73449e-11	-1.33537e-10	-8.83149e-10
		0.03186	-9.54729e-11	-1.32289e-10	-8.82522e-10
		0.03188	-9.23529e-11	-1.29169e-10	-8.83149e-10
		0.0319	-8.98568e-11	-1.28545e-10	-8.83149e-10
		0.03192	-9.04808e-11	-1.29169e-10	-8.83776e-10
		0.03194	-9.04808e-11	-1.29169e-10	-8.80015e-10
		0.03196	-9.11049e-11	-1.31041e-10	-8.79388e-10
		0.03198	-9.54729e-11	-1.31665e-10	-8.78135e-10
		0.032	-9.60969e-11	-1.32913e-10	-8.76254e-10
		0.03202	-9.67209e-11	-1.32289e-10	-8.75628e-10
		0.03204	-9.79689e-11	-1.32289e-10	-8.76254e-10
		0.03206	-9.60969e-11	-1.32289e-10	-8.77508e-10
		0.03208	-9.60969e-11	-1.33537e-10	-8.78762e-10
		0.0321	-9.48489e-11	-1.33537e-10	-8.79388e-10
		0.03212	-9.67209e-11	-1.35409e-10	-8.78762e-10
		0.03214	-9.73449e-11	-1.34785e-10	-8.78135e-10
		0.03216	-9.79689e-11	-1.34161e-10	-8.80015e-10
		0.03218	-9.79689e-11	-1.32289e-10	-8.80015e-10
		0.0322	-9.60969e-11	-1.31041e-10	-8.80642e-10
		0.03222	-9.48489e-11	-1.30417e-10	-8.80015e-10
		0.03224	-9.29769e-11	-1.29793e-10	-8.83776e-10
		0.03226	-9.17289e-11	-1.30417e-10	-8.85029e-10
		0.03228	-9.04808e-11	-1.29793e-10	-8.85029e-10
		0.0323	-9.17289e-11	-1.31041e-10	-8.81895e-10
		0.03232	-9.23529e-11	-1.31041e-10	-8.80015e-10
		0.03234	-9.36009e-11	-1.31665e-10	-8.79388e-10
		0.03236	-9.23529e-11	-1.31665e-10	-8.78762e-10
		0.03238	-9.29769e-11	-1.31665e-10	-8.80015e-10
		0.0324	-9.23529e-11	-1.31041e-10	-8.80642e-10
		0.03242	-9.17289e-11	-1.32289e-10	-8.81269e-10
		0.03244	-8.98568e-11	-1.31041e-10	-8.81269e-10
		0.03246	-8.86088e-11	-1.31041e-10	-8.82522e-10
		0.03248	-8.79848e-11	-1.31665e-10	-8.81895e-10
		0.0325	-8.86088e-11	-1.31041e-10	-8.82522e-10
		0.03252	-8.92328e-11	-1.30417e-10	-8.81269e-10
		0.03254	-8.86088e-11	-1.29169e-10	-8.80015e-10
		0.03256	-8.86088e-11	-1.28545e-10	-8.81269e-10
		0.03258	-8.92328e-11	-1.29793e-10	-8.79388e-10
		0.0326	-8.92328e-11	-1.30417e-10	-8.79388e-10
		0.03262	-8.73608e-11	-1.32913e-10	-8.80642e-10
		0.03264	-8.61128e-11	-1.34161e-10	-8.81269e-10
		0.03266	-8.61128e-11	-1.35409e-10	-8.80642e-10
		0.03268	-8.54888e-11	-1.33537e-10	-8.77508e-10
		0.0327	-8.54888e-11	-1.32289e-10	-8.76254e-10
		0.03272	-8.54888e-11	-1.30417e-10	-8.75001e-10
		0.03274	-8.61128e-11	-1.31665e-10	-8.75628e-10
		0.03276	-8.73608e-11	-1.31041e-10	-8.76881e-10
		0.03278	-8.79848e-11	-1.34161e-10	-8.76254e-10
		0.0328	-8.86088e-11	-1.32913e-10	-8.76254e-10
		0.03282	-8.86088e-11	-1.32289e-10	-8.76881e-10
		0.03284	-9.17289e-11	-1.31665e-10	-8.76254e-10
		0.03286	-9.17289e-11	-1.30417e-10	-8.77508e-10
		0.03288	-9.36009e-11	-1.29793e-10	-8.78135e-10
		0.0329	-9.36009e-11	-1.29169e-10	-8.77508e-10
		0.03292	-9.23529e-11	-1.29169e-10	-8.78762e-10
		0.03294	-9.23529e-11	-1.31665e-10	-8.78762e-10
		0.03296	-9.11049e-11	-1.31041e-10	-8.80642e-10
		0.03298	-9.23529e-11	-1.31665e-10	-8.78762e-10
		0.033	-9.17289e-11	-1.32289e-10	-8.80015e-10
		0.03302	-9.11049e-11	-1.33537e-10	-8.80642e-10
		0.03304	-9.42249e-11	-1.33537e-10	-8.78762e-10
		0.03306	-9.29769e-11	-1.34161e-10	-8.78135e-10
		0.03308	-9.23529e-11	-1.33537e-10	-8.75628e-10
		0.0331	-9.36009e-11	-1.33537e-10	-8.73747e-10
		0.03312	-9.23529e-11	-1.33537e-10	-8.75001e-10
		0.03314	-9.11049e-11	-1.34161e-10	-8.75001e-10
		0.03316	-9.17289e-11	-1.33537e-10	-8.75628e-10
		0.03318	-9.17289e-11	-1.31665e-10	-8.76881e-10
		0.0332	-8.98568e-11	-1.29169e-10	-8.75628e-10
		0.03322	-8.98568e-11	-1.29169e-10	-8.76254e-10
		0.03324	-8.92328e-11	-1.26673e-10	-8.75628e-10
		0.03326	-8.92328e-11	-1.26673e-10	-8.75628e-10
		0.03328	-8.98568e-11	-1.26673e-10	-8.72494e-10
		0.0333	-8.86088e-11	-1.27297e-10	-8.72494e-10
		0.03332	-8.79848e-11	-1.27297e-10	-8.7312e-10
		0.03334	-8.86088e-11	-1.26049e-10	-8.7312e-10
		0.03336	-8.67368e-11	-1.26049e-10	-8.7312e-10
		0.03338	-8.79848e-11	-1.24801e-10	-8.73747e-10
		0.0334	-8.67368e-11	-1.23553e-10	-8.75628e-10
		0.03342	-8.73608e-11	-1.24801e-10	-8.76881e-10
		0.03344	-8.54888e-11	-1.23553e-10	-8.76881e-10
		0.03346	-8.67368e-11	-1.24801e-10	-8.77508e-10
		0.03348	-8.61128e-11	-1.26049e-10	-8.77508e-10
		0.0335	-8.86088e-11	-1.26049e-10	-8.76881e-10
		0.03352	-8.92328e-11	-1.26673e-10	-8.75001e-10
		0.03354	-9.04808e-11	-1.26673e-10	-8.7312e-10
		0.03356	-9.17289e-11	-1.27921e-10	-8.70613e-10
		0.03358	-9.29769e-11	-1.28545e-10	-8.6936e-10
		0.0336	-9.42249e-11	-1.27921e-10	-8.7124e-10
		0.03362	-9.36009e-11	-1.29793e-10	-8.72494e-10
		0.03364	-9.17289e-11	-1.31041e-10	-8.75001e-10
		0.03366	-9.23529e-11	-1.30417e-10	-8.77508e-10
		0.03368	-9.11049e-11	-1.29793e-10	-8.78135e-10
		0.0337	-9.23529e-11	-1.29169e-10	-8.77508e-10
		0.03372	-9.23529e-11	-1.27297e-10	-8.78762e-10
		0.03374	-9.11049e-11	-1.27297e-10	-8.78135e-10
		0.03376	-9.04808e-11	-1.27921e-10	-8.77508e-10
		0.03378	-9.11049e-11	-1.29169e-10	-8.77508e-10
		0.0338	-9.36009e-11	-1.29169e-10	-8.76881e-10
		0.03382	-9.42249e-11	-1.27921e-10	-8.76254e-10
		0.03384	-9.42249e-11	-1.27297e-10	-8.77508e-10
		0.03386	-9.42249e-11	-1.26673e-10	-8.76881e-10
		0.03388	-9.29769e-11	-1.23553e-10	-8.76881e-10
		0.0339	-9.11049e-11	-1.26049e-10	-8.75628e-10
		0.03392	-9.17289e-11	-1.27297e-10	-8.73747e-10
		0.03394	-9.36009e-11	-1.26673e-10	-8.75001e-10
		0.03396	-9.48489e-11	-1.26673e-10	-8.74374e-10
		0.03398	-9.54729e-11	-1.29169e-10	-8.74374e-10
		0.034	-9.48489e-11	-1.27297e-10	-8.75628e-10
		0.03402	-9.54729e-11	-1.26673e-10	-8.78135e-10
		0.03404	-9.29769e-11	-1.27297e-10	-8.80642e-10
		0.03406	-9.36009e-11	-1.24177e-10	-8.82522e-10
		0.03408	-9.23529e-11	-1.26049e-10	-8.82522e-10
		0.0341	-9.17289e-11	-1.25425e-10	-8.80642e-10
		0.03412	-8.98568e-11	-1.24801e-10	-8.80642e-10
		0.03414	-9.04808e-11	-1.28545e-10	-8.78762e-10
		0.03416	-9.23529e-11	-1.29169e-10	-8.78135e-10
		0.03418	-9.11049e-11	-1.30417e-10	-8.78762e-10
		0.0342	-9.23529e-11	-1.31041e-10	-8.77508e-10
		0.03422	-9.11049e-11	-1.31665e-10	-8.76881e-10
		0.03424	-9.11049e-11	-1.30417e-10	-8.75001e-10
		0.03426	-9.04808e-11	-1.29169e-10	-8.75628e-10
		0.03428	-8.98568e-11	-1.27297e-10	-8.77508e-10
		0.0343	-9.17289e-11	-1.28545e-10	-8.76881e-10
		0.03432	-9.11049e-11	-1.27921e-10	-8.76254e-10
		0.03434	-9.11049e-11	-1.26673e-10	-8.75628e-10
		0.03436	-8.92328e-11	-1.25425e-10	-8.77508e-10
		0.03438	-8.98568e-11	-1.24801e-10	-8.76254e-10
		0.0344	-8.79848e-11	-1.24801e-10	-8.75628e-10
		0.03442	-8.73608e-11	-1.24801e-10	-8.75628e-10
		0.03444	-8.86088e-11	-1.24801e-10	-8.75628e-10
		0.03446	-8.92328e-11	-1.27297e-10	-8.76881e-10
		0.03448	-8.98568e-11	-1.29793e-10	-8.77508e-10
		0.0345	-9.23529e-11	-1.31041e-10	-8.76254e-10
		0.03452	-9.36009e-11	-1.33537e-10	-8.76254e-10
		0.03454	-9.42249e-11	-1.34161e-10	-8.74374e-10
		0.03456	-9.23529e-11	-1.32289e-10	-8.74374e-10
		0.03458	-9.17289e-11	-1.31041e-10	-8.74374e-10
		0.0346	-9.11049e-11	-1.29793e-10	-8.74374e-10
		0.03462	-9.17289e-11	-1.31041e-10	-8.75001e-10
		0.03464	-9.04808e-11	-1.29793e-10	-8.74374e-10
		0.03466	-8.98568e-11	-1.30417e-10	-8.74374e-10
		0.03468	-8.98568e-11	-1.31665e-10	-8.75628e-10
		0.0347	-8.86088e-11	-1.31041e-10	-8.75628e-10
		0.03472	-8.92328e-11	-1.31041e-10	-8.75001e-10
		0.03474	-8.86088e-11	-1.31665e-10	-8.76881e-10
		0.03476	-8.86088e-11	-1.29169e-10	-8.78135e-10
		0.03478	-8.86088e-11	-1.29169e-10	-8.79388e-10
		0.0348	-8.86088e-11	-1.28545e-10	-8.80015e-10
		0.03482	-8.86088e-11	-1.29169e-10	-8.81895e-10
		0.03484	-8.73608e-11	-1.27921e-10	-8.79388e-10
		0.03486	-8.79848e-11	-1.26673e-10	-8.80015e-10
		0.03488	-8.92328e-11	-1.23553e-10	-8.77508e-10
		0.0349	-8.79848e-11	-1.25425e-10	-8.77508e-10
		0.03492	-8.86088e-11	-1.24177e-10	-8.78135e-10
		0.03494	-9.17289e-11	-1.25425e-10	-8.78762e-10
		0.03496	-9.23529e-11	-1.27297e-10	-8.81895e-10
		0.03498	-9.54729e-11	-1.26673e-10	-8.81895e-10
		0.035	-9.60969e-11	-1.26673e-10	-8.81895e-10
		0.03502	-9.60969e-11	-1.27297e-10	-8.82522e-10
		0.03504	-9.60969e-11	-1.27297e-10	-8.82522e-10
		0.03506	-9.48489e-11	-1.27921e-10	-8.81895e-10
		0.03508	-9.23529e-11	-1.29169e-10	-8.80015e-10
		0.0351	-9.29769e-11	-1.29793e-10	-8.79388e-10
		0.03512	-9.17289e-11	-1.31665e-10	-8.80015e-10
		0.03514	-9.42249e-11	-1.33537e-10	-8.77508e-10
		0.03516	-9.36009e-11	-1.33537e-10	-8.78762e-10
		0.03518	-9.48489e-11	-1.32913e-10	-8.78762e-10
		0.0352	-9.54729e-11	-1.31665e-10	-8.81895e-10
		0.03522	-9.48489e-11	-1.30417e-10	-8.83776e-10
		0.03524	-9.48489e-11	-1.30417e-10	-8.83776e-10
		0.03526	-9.29769e-11	-1.30417e-10	-8.84403e-10
		0.03528	-9.17289e-11	-1.30417e-10	-8.85029e-10
		0.0353	-9.23529e-11	-1.32289e-10	-8.84403e-10
		0.03532	-9.17289e-11	-1.34161e-10	-8.81895e-10
		0.03534	-9.04808e-11	-1.31665e-10	-8.80642e-10
		0.03536	-8.98568e-11	-1.31665e-10	-8.80015e-10
		0.03538	-8.86088e-11	-1.29169e-10	-8.79388e-10
		0.0354	-8.54888e-11	-1.28545e-10	-8.80015e-10
		0.03542	-8.54888e-11	-1.29169e-10	-8.81269e-10
		0.03544	-8.48648e-11	-1.29793e-10	-8.81269e-10
		0.03546	-8.42408e-11	-1.31041e-10	-8.81269e-10
		0.03548	-8.36168e-11	-1.31665e-10	-8.81895e-10
		0.0355	-8.54888e-11	-1.29793e-10	-8.80015e-10
		0.03552	-8.61128e-11	-1.29169e-10	-8.79388e-10
		0.03554	-8.73608e-11	-1.29169e-10	-8.81269e-10
		0.03556	-8.67368e-11	-1.28545e-10	-8.80642e-10
		0.03558	-8.79848e-11	-1.29793e-10	-8.80015e-10
		0.0356	-8.67368e-11	-1.29793e-10	-8.80642e-10
		0.03562	-8.73608e-11	-1.34161e-10	-8.81895e-10
		0.03564	-8.98568e-11	-1.34161e-10	-8.83776e-10
		0.03566	-9.04808e-11	-1.32289e-10	-8.82522e-10
		0.03568	-8.86088e-11	-1.32913e-10	-8.83776e-10
		0.0357	-9.04808e-11	-1.31665e-10	-8.83149e-10
		0.03572	-8.92328e-11	-1.29793e-10	-8.85029e-10
		0.03574	-8.92328e-11	-1.29793e-10	-8.85656e-10
		0.03576	-8.86088e-11	-1.29169e-10	-8.88163e-10
		0.03578	-8.79848e-11	-1.31665e-10	-8.88163e-10
		0.0358	-8.73608e-11	-1.32289e-10	-8.8879e-10
		0.03582	-8.79848e-11	-1.33537e-10	-8.8879e-10
		0.03584	-8.79848e-11	-1.34161e-10	-8.8879e-10
		0.03586	-8.98568e-11	-1.31665e-10	-8.88163e-10
		0.03588	-9.04808e-11	-1.29793e-10	-8.87537e-10
		0.0359	-9.04808e-11	-1.28545e-10	-8.8879e-10
		0.03592	-9.17289e-11	-1.28545e-10	-8.8879e-10
		0.03594	-9.04808e-11	-1.28545e-10	-8.89417e-10
		0.03596	-8.98568e-11	-1.27921e-10	-8.88163e-10
		0.03598	-8.79848e-11	-1.27921e-10	-8.88163e-10
		0.036	-8.86088e-11	-1.27297e-10	-8.87537e-10
		0.03602	-8.92328e-11	-1.27297e-10	-8.85656e-10
		0.03604	-8.86088e-11	-1.26049e-10	-8.83776e-10
		0.03606	-9.04808e-11	-1.23553e-10	-8.81269e-10
		0.03608	-9.23529e-11	-1.21681e-10	-8.80015e-10
		0.0361	-9.36009e-11	-1.23553e-10	-8.78762e-10
		0.03612	-9.36009e-11	-1.24177e-10	-8.78762e-10
		0.03614	-9.48489e-11	-1.26049e-10	-8.78762e-10
		0.03616	-9.36009e-11	-1.27297e-10	-8.81895e-10
		0.03618	-9.48489e-11	-1.27297e-10	-8.81269e-10
		0.0362	-9.36009e-11	-1.25425e-10	-8.80015e-10
		0.03622	-9.11049e-11	-1.24177e-10	-8.82522e-10
		0.03624	-9.23529e-11	-1.21681e-10	-8.82522e-10
		0.03626	-9.11049e-11	-1.23553e-10	-8.84403e-10
		0.03628	-9.29769e-11	-1.23553e-10	-8.85029e-10
		0.0363	-9.36009e-11	-1.24801e-10	-8.85029e-10
		0.03632	-9.42249e-11	-1.26673e-10	-8.86283e-10
		0.03634	-9.42249e-11	-1.26673e-10	-8.85029e-10
		0.03636	-9.42249e-11	-1.26673e-10	-8.83149e-10
		0.03638	-9.23529e-11	-1.26049e-10	-8.81269e-10
		0.0364	-9.11049e-11	-1.24801e-10	-8.81269e-10
		0.03642	-9.17289e-11	-1.24177e-10	-8.83149e-10
		0.03644	-9.17289e-11	-1.23553e-10	-8.86283e-10
		0.03646	-9.11049e-11	-1.26049e-10	-8.8691e-10
		0.03648	-9.29769e-11	-1.24801e-10	-8.8691e-10
		0.0365	-9.36009e-11	-1.23553e-10	-8.8691e-10
		0.03652	-9.67209e-11	-1.24177e-10	-8.85029e-10
		0.03654	-9.54729e-11	-1.24177e-10	-8.83149e-10
		0.03656	-9.48489e-11	-1.23553e-10	-8.81269e-10
		0.03658	-9.42249e-11	-1.26049e-10	-8.81269e-10
		0.0366	-9.42249e-11	-1.26673e-10	-8.80642e-10
		0.03662	-9.36009e-11	-1.27297e-10	-8.80642e-10
		0.03664	-8.92328e-11	-1.28545e-10	-8.80642e-10
		0.03666	-9.04808e-11	-1.27921e-10	-8.80015e-10
		0.03668	-8.98568e-11	-1.27921e-10	-8.78762e-10
		0.0367	-9.17289e-11	-1.26049e-10	-8.78135e-10
		0.03672	-9.17289e-11	-1.23553e-10	-8.76881e-10
		0.03674	-9.23529e-11	-1.23553e-10	-8.78135e-10
		0.03676	-9.29769e-11	-1.21681e-10	-8.77508e-10
		0.03678	-9.23529e-11	-1.21681e-10	-8.77508e-10
		0.0368	-9.11049e-11	-1.19809e-10	-8.78135e-10
		0.03682	-9.11049e-11	-1.20433e-10	-8.76881e-10
		0.03684	-9.17289e-11	-1.22929e-10	-8.75628e-10
		0.03686	-9.17289e-11	-1.22929e-10	-8.74374e-10
		0.03688	-9.17289e-11	-1.24801e-10	-8.76881e-10
		0.0369	-9.36009e-11	-1.25425e-10	-8.75628e-10
		0.03692	-9.17289e-11	-1.24801e-10	-8.78135e-10
		0.03694	-9.04808e-11	-1.26673e-10	-8.78762e-10
		0.03696	-9.04808e-11	-1.26049e-10	-8.80642e-10
		0.03698	-9.11049e-11	-1.26673e-10	-8.81895e-10
		0.037	-8.92328e-11	-1.26049e-10	-8.82522e-10
		0.03702	-8.86088e-11	-1.26049e-10	-8.80642e-10
		0.03704	-8.73608e-11	-1.24801e-10	-8.79388e-10
		0.03706	-8.98568e-11	-1.24801e-10	-8.79388e-10
		0.03708	-8.86088e-11	-1.23553e-10	-8.79388e-10
		0.0371	-8.86088e-11	-1.24801e-10	-8.78135e-10
		0.03712	-9.11049e-11	-1.26049e-10	-8.80015e-10
		0.03714	-9.17289e-11	-1.26673e-10	-8.80642e-10
		0.03716	-9.29769e-11	-1.27921e-10	-8.82522e-10
		0.03718	-9.29769e-11	-1.30417e-10	-8.83776e-10
		0.0372	-9.29769e-11	-1.29169e-10	-8.83776e-10
		0.03722	-9.29769e-11	-1.28545e-10	-8.86283e-10
		0.03724	-9.29769e-11	-1.27921e-10	-8.87537e-10
		0.03726	-9.17289e-11	-1.27921e-10	-8.8879e-10
		0.03728	-9.04808e-11	-1.27921e-10	-8.89417e-10
		0.0373	-9.11049e-11	-1.28545e-10	-8.90044e-10
		0.03732	-9.17289e-11	-1.27921e-10	-8.90044e-10
		0.03734	-9.17289e-11	-1.27921e-10	-8.88163e-10
		0.03736	-9.23529e-11	-1.26673e-10	-8.86283e-10
		0.03738	-9.23529e-11	-1.25425e-10	-8.83776e-10
		0.0374	-9.17289e-11	-1.24177e-10	-8.81895e-10
		0.03742	-9.29769e-11	-1.25425e-10	-8.81895e-10
		0.03744	-9.23529e-11	-1.24177e-10	-8.80015e-10
		0.03746	-9.17289e-11	-1.25425e-10	-8.81269e-10
		0.03748	-9.11049e-11	-1.25425e-10	-8.79388e-10
		0.0375	-9.04808e-11	-1.26673e-10	-8.78762e-10
		0.03752	-8.98568e-11	-1.26049e-10	-8.78762e-10
		0.03754	-8.86088e-11	-1.24177e-10	-8.78762e-10
		0.03756	-8.79848e-11	-1.24801e-10	-8.81895e-10
		0.03758	-8.73608e-11	-1.25425e-10	-8.81269e-10
		0.0376	-8.79848e-11	-1.27921e-10	-8.82522e-10
		0.03762	-8.73608e-11	-1.27297e-10	-8.81895e-10
		0.03764	-8.79848e-11	-1.28545e-10	-8.83776e-10
		0.03766	-9.04808e-11	-1.28545e-10	-8.83149e-10
		0.03768	-9.23529e-11	-1.27921e-10	-8.83149e-10
		0.0377	-9.23529e-11	-1.26673e-10	-8.85029e-10
		0.03772	-9.17289e-11	-1.25425e-10	-8.85656e-10
		0.03774	-9.29769e-11	-1.24801e-10	-8.8691e-10
		0.03776	-9.48489e-11	-1.25425e-10	-8.87537e-10
		0.03778	-9.23529e-11	-1.26049e-10	-8.89417e-10
		0.0378	-9.29769e-11	-1.26673e-10	-8.91297e-10
		0.03782	-9.48489e-11	-1.27297e-10	-8.91924e-10
		0.03784	-9.23529e-11	-1.27297e-10	-8.90671e-10
		0.03786	-9.36009e-11	-1.25425e-10	-8.91297e-10
		0.03788	-9.42249e-11	-1.26049e-10	-8.91924e-10
		0.0379	-9.54729e-11	-1.26049e-10	-8.92551e-10
		0.03792	-9.54729e-11	-1.24177e-10	-8.90671e-10
		0.03794	-9.60969e-11	-1.25425e-10	-8.91297e-10
		0.03796	-9.54729e-11	-1.26049e-10	-8.90671e-10
		0.03798	-9.42249e-11	-1.27921e-10	-8.90044e-10
		0.038	-9.23529e-11	-1.28545e-10	-8.91297e-10
		0.03802	-9.04808e-11	-1.29793e-10	-8.89417e-10
		0.03804	-9.11049e-11	-1.28545e-10	-8.88163e-10
		0.03806	-8.98568e-11	-1.27921e-10	-8.8691e-10
		0.03808	-9.04808e-11	-1.26049e-10	-8.85029e-10
		0.0381	-9.23529e-11	-1.28545e-10	-8.86283e-10
		0.03812	-9.23529e-11	-1.26673e-10	-8.85656e-10
		0.03814	-9.42249e-11	-1.26673e-10	-8.85029e-10
		0.03816	-9.67209e-11	-1.27921e-10	-8.87537e-10
		0.03818	-9.48489e-11	-1.26673e-10	-8.88163e-10
		0.0382	-9.42249e-11	-1.24177e-10	-8.89417e-10
		0.03822	-9.23529e-11	-1.23553e-10	-8.90044e-10
		0.03824	-9.11049e-11	-1.22929e-10	-8.90671e-10
		0.03826	-8.86088e-11	-1.22929e-10	-8.89417e-10
		0.03828	-8.86088e-11	-1.25425e-10	-8.8879e-10
		0.0383	-8.86088e-11	-1.26673e-10	-8.88163e-10
		0.03832	-8.86088e-11	-1.27297e-10	-8.89417e-10
		0.03834	-9.17289e-11	-1.29169e-10	-8.87537e-10
		0.03836	-9.17289e-11	-1.27297e-10	-8.88163e-10
		0.03838	-9.36009e-11	-1.27921e-10	-8.87537e-10
		0.0384	-9.48489e-11	-1.24801e-10	-8.89417e-10
		0.03842	-9.60969e-11	-1.24801e-10	-8.87537e-10
		0.03844	-9.54729e-11	-1.24801e-10	-8.88163e-10
		0.03846	-9.60969e-11	-1.23553e-10	-8.89417e-10
		0.03848	-9.54729e-11	-1.24177e-10	-8.89417e-10
		0.0385	-9.73449e-11	-1.22305e-10	-8.90671e-10
		0.03852	-9.73449e-11	-1.22929e-10	-8.90671e-10
		0.03854	-9.60969e-11	-1.22929e-10	-8.90044e-10
		0.03856	-9.42249e-11	-1.23553e-10	-8.90671e-10
		0.03858	-9.36009e-11	-1.21681e-10	-8.89417e-10
		0.0386	-9.11049e-11	-1.22929e-10	-8.90044e-10
		0.03862	-9.04808e-11	-1.24177e-10	-8.89417e-10
		0.03864	-8.92328e-11	-1.25425e-10	-8.90671e-10
		0.03866	-8.73608e-11	-1.26049e-10	-8.90044e-10
		0.03868	-8.79848e-11	-1.26049e-10	-8.90671e-10
		0.0387	-8.86088e-11	-1.24801e-10	-8.91297e-10
		0.03872	-8.92328e-11	-1.23553e-10	-8.93178e-10
		0.03874	-8.98568e-11	-1.22929e-10	-8.93178e-10
		0.03876	-9.04808e-11	-1.24177e-10	-8.91297e-10
		0.03878	-9.17289e-11	-1.26049e-10	-8.91297e-10
		0.0388	-9.11049e-11	-1.26049e-10	-8.91297e-10
		0.03882	-9.17289e-11	-1.26673e-10	-8.90671e-10
		0.03884	-8.98568e-11	-1.26049e-10	-8.8879e-10
		0.03886	-9.04808e-11	-1.24801e-10	-8.87537e-10
		0.03888	-8.86088e-11	-1.25425e-10	-8.85656e-10
		0.0389	-9.04808e-11	-1.25425e-10	-8.83776e-10
		0.03892	-9.11049e-11	-1.26049e-10	-8.84403e-10
		0.03894	-9.04808e-11	-1.28545e-10	-8.83776e-10
		0.03896	-9.11049e-11	-1.29793e-10	-8.85656e-10
		0.03898	-9.17289e-11	-1.31665e-10	-8.8691e-10
		0.039	-9.29769e-11	-1.31665e-10	-8.8691e-10
		0.03902	-9.48489e-11	-1.33537e-10	-8.88163e-10
		0.03904	-9.60969e-11	-1.32913e-10	-8.8691e-10
		0.03906	-9.67209e-11	-1.34161e-10	-8.86283e-10
		0.03908	-9.79689e-11	-1.32289e-10	-8.85656e-10
		0.0391	-9.85929e-11	-1.32913e-10	-8.85029e-10
		0.03912	-9.73449e-11	-1.30417e-10	-8.85656e-10
		0.03914	-9.79689e-11	-1.31041e-10	-8.8691e-10
		0.03916	-9.54729e-11	-1.31041e-10	-8.86283e-10
		0.03918	-9.60969e-11	-1.31041e-10	-8.8691e-10
		0.0392	-9.36009e-11	-1.30417e-10	-8.89417e-10
		0.03922	-9.23529e-11	-1.28545e-10	-8.88163e-10
		0.03924	-9.17289e-11	-1.29169e-10	-8.90044e-10
		0.03926	-9.11049e-11	-1.27921e-10	-8.91924e-10
		0.03928	-9.04808e-11	-1.27921e-10	-8.90044e-10
		0.0393	-9.04808e-11	-1.27921e-10	-8.90044e-10
		0.03932	-9.04808e-11	-1.28545e-10	-8.89417e-10
		0.03934	-9.11049e-11	-1.27297e-10	-8.89417e-10
		0.03936	-9.04808e-11	-1.26673e-10	-8.90044e-10
		0.03938	-9.11049e-11	-1.27921e-10	-8.90671e-10
		0.0394	-9.04808e-11	-1.24177e-10	-8.87537e-10
		0.03942	-8.98568e-11	-1.24177e-10	-8.86283e-10
		0.03944	-9.17289e-11	-1.23553e-10	-8.85029e-10
		0.03946	-9.04808e-11	-1.26049e-10	-8.84403e-10
		0.03948	-8.98568e-11	-1.24801e-10	-8.84403e-10
		0.0395	-9.04808e-11	-1.27297e-10	-8.86283e-10
		0.03952	-9.11049e-11	-1.27297e-10	-8.8879e-10
		0.03954	-9.23529e-11	-1.26049e-10	-8.89417e-10
		0.03956	-9.29769e-11	-1.26673e-10	-8.91297e-10
		0.03958	-9.29769e-11	-1.24801e-10	-8.90044e-10
		0.0396	-9.36009e-11	-1.25425e-10	-8.90671e-10
		0.03962	-9.23529e-11	-1.23553e-10	-8.91297e-10
		0.03964	-9.42249e-11	-1.23553e-10	-8.91924e-10
		0.03966	-9.17289e-11	-1.23553e-10	-8.91924e-10
		0.03968	-9.36009e-11	-1.24801e-10	-8.93178e-10
		0.0397	-9.29769e-11	-1.27297e-10	-8.93178e-10
		0.03972	-9.29769e-11	-1.27921e-10	-8.94431e-10
		0.03974	-9.42249e-11	-1.28545e-10	-8.95058e-10
		0.03976	-9.23529e-11	-1.29169e-10	-8.95685e-10
		0.03978	-9.42249e-11	-1.30417e-10	-8.95058e-10
		0.0398	-9.17289e-11	-1.31041e-10	-8.94431e-10
		0.03982	-9.11049e-11	-1.29793e-10	-8.93804e-10
		0.03984	-8.98568e-11	-1.29169e-10	-8.91924e-10
		0.03986	-8.73608e-11	-1.26049e-10	-8.91924e-10
		0.03988	-8.54888e-11	-1.26049e-10	-8.91297e-10
		0.0399	-8.36168e-11	-1.23553e-10	-8.90671e-10
		0.03992	-8.61128e-11	-1.21057e-10	-8.90044e-10
[truncated: 15,303 more rows]
