# Supplementary material for: Physiological roles of endocytosis and presynaptic scaffold in vesicle replenishment at fast and slow central synapses
Source: eLife. 2024 Jun 3;12:RP90497. doi: 10.7554/eLife.90497 (PMC11147502; doi:10.7554/eLife.90497)
Supplement: Figure 2—source data 1. [file elife-90497-fig2-data1.xlsx]

## Sheet: 10 Hz data, Fig 2A
		Figure 2A1_sample EPSC traces					Figure 2A1_normalized EPSC amplitude vs stimulation (#)								Figure 2A1_average depression at EPSCs (#26-30)					Figure 2A2_normalized recovery from STD vs time interval (s)
		Time (s)	Control	Dynasore	Pitstop-2		Stimulation (#)	Control		Dynasore		Pitstop-2				Control	Dynasore	Pitstop-2		Time interval (s)	Control		Dynasore		Pitstop-2
								Mean	SEM	Mean	SEM	Mean	SEM		Mean	0.55	0.48	0.525			Mean	SEM	Mean	SEM	Mean	SEM
		0	-6.61446e-11	-1.22929e-10	-2.68323e-10		1	1	0	1	0	1	0		SEM	0.021	0.022	0.019		0.3	0.103	0.046	0.123	0.033	0.192	0.038
		2e-05	-6.61446e-11	-1.22305e-10	-2.67699e-10		2	0.867432	0.0261794	0.769049	0.0290676	0.83723	0.020754		n number	11	12	7		1	0.394	0.039	0.413	0.03	0.485	0.036
		4e-05	-6.86406e-11	-1.23553e-10	-2.67075e-10		3	0.743416	0.0388653	0.690814	0.0310655	0.722308	0.0311416		p-value	--	0.03	0.41		3	0.71	0.051	0.724	0.03	0.723	0.053
		6e-05	-6.67686e-11	-1.22929e-10	-2.68323e-10		4	0.7138	0.0383158	0.598405	0.035283	0.67109	0.0336881				ns	ns		8	0.969	0.041	0.952	0.034	0.942	0.017
		8e-05	-6.67686e-11	-1.22305e-10	-2.67699e-10		5	0.652511	0.0344529	0.55646	0.0323734	0.606167	0.0246932							12	0.997	0.039	0.983	0.042	0.987	0.027
		0.0001	-6.48966e-11	-1.21681e-10	-2.68947e-10		6	0.649857	0.0331542	0.538638	0.0294712	0.586487	0.0221581							20	1.013	0.039	0.962	0.019	1.007	0.027
		0.00012	-6.55206e-11	-1.20433e-10	-2.68947e-10		7	0.573968	0.026087	0.513437	0.0283198	0.532636	0.0347228
		0.00014	-6.61446e-11	-1.19185e-10	-2.68323e-10		8	0.605252	0.0303218	0.50672	0.021023	0.533642	0.031221
		0.00016	-6.67686e-11	-1.20433e-10	-2.69571e-10		9	0.57535	0.0305818	0.489667	0.0279743	0.537602	0.0292475
		0.00018	-6.80166e-11	-1.20433e-10	-2.70195e-10		10	0.567008	0.0365186	0.508137	0.0249936	0.537818	0.0309434
		0.0002	-6.80166e-11	-1.20433e-10	-2.70195e-10		11	0.568741	0.0433431	0.490764	0.0205419	0.52168	0.0256975
		0.00022	-6.67686e-11	-1.21057e-10	-2.70819e-10		12	0.547246	0.0252336	0.488365	0.0290146	0.539676	0.0285265
		0.00024	-6.67686e-11	-1.20433e-10	-2.71443e-10		13	0.541476	0.0266238	0.485817	0.0304903	0.545158	0.0198723
		0.00026	-6.61446e-11	-1.21057e-10	-2.71443e-10		14	0.545134	0.0302441	0.504734	0.0287437	0.546207	0.0329346
		0.00028	-6.48966e-11	-1.21057e-10	-2.70819e-10		15	0.52693	0.0294718	0.489708	0.0185705	0.557407	0.0221684
		0.0003	-6.48966e-11	-1.20433e-10	-2.70195e-10		16	0.520931	0.0209583	0.472788	0.0242542	0.544532	0.0280281
		0.00032	-6.48966e-11	-1.19185e-10	-2.69571e-10		17	0.557318	0.0320556	0.477932	0.0293819	0.536743	0.0375185
		0.00034	-6.42726e-11	-1.19809e-10	-2.67699e-10		18	0.524863	0.022298	0.478741	0.0220524	0.542077	0.0164698
		0.00036	-6.48966e-11	-1.20433e-10	-2.67699e-10		19	0.537694	0.0221431	0.500648	0.0225758	0.506024	0.0185821
		0.00038	-6.48966e-11	-1.21057e-10	-2.65826e-10		20	0.55778	0.0199806	0.506365	0.0232964	0.532592	0.0301168
		0.0004	-6.30246e-11	-1.20433e-10	-2.67075e-10		21	0.537371	0.0422307	0.481665	0.0282733	0.530465	0.0269598
		0.00042	-6.48966e-11	-1.21057e-10	-2.67075e-10		22	0.51879	0.0333961	0.502319	0.0279529	0.525818	0.0244214
		0.00044	-6.67686e-11	-1.21681e-10	-2.69571e-10		23	0.560433	0.0288097	0.516413	0.0211625	0.539079	0.0223697
		0.00046	-6.80166e-11	-1.24801e-10	-2.70195e-10		24	0.528898	0.0328233	0.466246	0.0212349	0.527836	0.0201617
		0.00048	-6.80166e-11	-1.22305e-10	-2.70195e-10		25	0.537038	0.0200392	0.482195	0.0287183	0.528763	0.0180518
		0.0005	-6.86406e-11	-1.21057e-10	-2.71443e-10		26	0.543298	0.0194204	0.485513	0.0253253	0.529777	0.0173966
		0.00052	-6.86406e-11	-1.19809e-10	-2.70195e-10		27	0.51414	0.0226102	0.477091	0.0294677	0.504608	0.0271006
		0.00054	-6.73926e-11	-1.18561e-10	-2.70195e-10		28	0.563898	0.0350237	0.470417	0.0215383	0.518621	0.0279807
		0.00056	-6.48966e-11	-1.17313e-10	-2.70195e-10		29	0.580793	0.0287086	0.480662	0.0200002	0.540144	0.0252926
		0.00058	-6.36486e-11	-1.19185e-10	-2.70819e-10		30	0.546012	0.0253243	0.476826	0.0241391	0.533085	0.0143123
		0.0006	-6.42726e-11	-1.20433e-10	-2.70195e-10
		0.00062	-6.55206e-11	-1.22305e-10	-2.69571e-10
		0.00064	-6.55206e-11	-1.24177e-10	-2.70195e-10
		0.00066	-6.55206e-11	-1.24801e-10	-2.69571e-10
		0.00068	-6.48966e-11	-1.24177e-10	-2.70195e-10
		0.0007	-6.48966e-11	-1.23553e-10	-2.70819e-10
		0.00072	-6.48966e-11	-1.23553e-10	-2.70195e-10
		0.00074	-6.42726e-11	-1.23553e-10	-2.70819e-10
		0.00076	-6.61446e-11	-1.23553e-10	-2.71443e-10
		0.00078	-6.67686e-11	-1.21057e-10	-2.71443e-10
		0.0008	-6.55206e-11	-1.20433e-10	-2.72067e-10
		0.00082	-6.67686e-11	-1.19809e-10	-2.71443e-10
		0.00084	-6.61446e-11	-1.18561e-10	-2.71443e-10
		0.00086	-6.42726e-11	-1.18561e-10	-2.70819e-10
		0.00088	-6.55206e-11	-1.19185e-10	-2.70819e-10
		0.0009	-6.48966e-11	-1.19185e-10	-2.73939e-10
		0.00092	-6.55206e-11	-1.21681e-10	-2.75811e-10
		0.00094	-6.67686e-11	-1.22929e-10	-2.76435e-10
		0.00096	-6.73926e-11	-1.22929e-10	-2.76435e-10
		0.00098	-6.86406e-11	-1.20433e-10	-2.75187e-10
		0.001	-6.98887e-11	-1.20433e-10	-2.73939e-10
		0.00102	-7.11367e-11	-1.17937e-10	-2.73315e-10
		0.00104	-6.92646e-11	-1.18561e-10	-2.72067e-10
		0.00106	-6.92646e-11	-1.19185e-10	-2.72067e-10
		0.00108	-6.86406e-11	-1.21057e-10	-2.72067e-10
		0.0011	-6.73926e-11	-1.21057e-10	-2.73315e-10
		0.00112	-6.67686e-11	-1.21057e-10	-2.72691e-10
		0.00114	-6.55206e-11	-1.24177e-10	-2.70819e-10
		0.00116	-6.55206e-11	-1.23553e-10	-2.72067e-10
		0.00118	-6.48966e-11	-1.22929e-10	-2.70819e-10
		0.0012	-6.55206e-11	-1.22929e-10	-2.70819e-10
		0.00122	-6.36486e-11	-1.22305e-10	-2.72067e-10
		0.00124	-6.42726e-11	-1.22929e-10	-2.71443e-10
		0.00126	-6.17766e-11	-1.22305e-10	-2.72067e-10
		0.00128	-6.30246e-11	-1.24801e-10	-2.70819e-10
		0.0013	-6.42726e-11	-1.23553e-10	-2.68323e-10
		0.00132	-6.42726e-11	-1.24177e-10	-2.6645e-10
		0.00134	-6.48966e-11	-1.23553e-10	-2.6645e-10
		0.00136	-6.67686e-11	-1.21681e-10	-2.65202e-10
		0.00138	-6.55206e-11	-1.21681e-10	-2.65826e-10
		0.0014	-6.61446e-11	-1.22929e-10	-2.68947e-10
		0.00142	-6.55206e-11	-1.21681e-10	-2.70819e-10
		0.00144	-6.67686e-11	-1.23553e-10	-2.73315e-10
		0.00146	-6.80166e-11	-1.24177e-10	-2.73939e-10
		0.00148	-6.86406e-11	-1.21681e-10	-2.74563e-10
		0.0015	-6.80166e-11	-1.21057e-10	-2.72067e-10
		0.00152	-6.80166e-11	-1.20433e-10	-2.72691e-10
		0.00154	-6.67686e-11	-1.19809e-10	-2.70195e-10
		0.00156	-6.36486e-11	-1.17937e-10	-2.69571e-10
		0.00158	-6.17766e-11	-1.18561e-10	-2.68947e-10
		0.0016	-5.99046e-11	-1.19809e-10	-2.68947e-10
		0.00162	-6.05286e-11	-1.18561e-10	-2.69571e-10
		0.00164	-6.11526e-11	-1.18561e-10	-2.67699e-10
		0.00166	-6.11526e-11	-1.19185e-10	-2.68947e-10
		0.00168	-6.48966e-11	-1.21057e-10	-2.68323e-10
		0.0017	-6.61446e-11	-1.21681e-10	-2.69571e-10
		0.00172	-6.67686e-11	-1.21681e-10	-2.68323e-10
		0.00174	-6.67686e-11	-1.21681e-10	-2.69571e-10
		0.00176	-6.67686e-11	-1.20433e-10	-2.70819e-10
		0.00178	-6.61446e-11	-1.19809e-10	-2.70819e-10
		0.0018	-6.73926e-11	-1.18561e-10	-2.70819e-10
		0.00182	-6.67686e-11	-1.17937e-10	-2.70195e-10
		0.00184	-6.86406e-11	-1.17937e-10	-2.69571e-10
		0.00186	-6.92646e-11	-1.16689e-10	-2.70195e-10
		0.00188	-6.80166e-11	-1.17937e-10	-2.70195e-10
		0.0019	-6.61446e-11	-1.19185e-10	-2.70819e-10
		0.00192	-6.42726e-11	-1.19185e-10	-2.71443e-10
		0.00194	-6.05286e-11	-1.19809e-10	-2.71443e-10
		0.00196	-6.17766e-11	-1.20433e-10	-2.70819e-10
		0.00198	-6.17766e-11	-1.22305e-10	-2.70195e-10
		0.002	-6.61446e-11	-1.23553e-10	-2.68947e-10
		0.00202	-6.67686e-11	-1.26049e-10	-2.68947e-10
		0.00204	-6.80166e-11	-1.26673e-10	-2.70195e-10
		0.00206	-6.67686e-11	-1.27921e-10	-2.70819e-10
		0.00208	-6.61446e-11	-1.28545e-10	-2.71443e-10
		0.0021	-6.48966e-11	-1.29793e-10	-2.70819e-10
		0.00212	-6.48966e-11	-1.29169e-10	-2.70195e-10
		0.00214	-6.42726e-11	-1.28545e-10	-2.72691e-10
		0.00216	-6.61446e-11	-1.27921e-10	-2.73315e-10
		0.00218	-6.73926e-11	-1.24801e-10	-2.72691e-10
		0.0022	-6.73926e-11	-1.24177e-10	-2.73939e-10
		0.00222	-6.55206e-11	-1.22305e-10	-2.74563e-10
		0.00224	-6.36486e-11	-1.22305e-10	-2.75187e-10
		0.00226	-6.17766e-11	-1.22929e-10	-2.77683e-10
		0.00228	-6.11526e-11	-1.24177e-10	-2.77683e-10
		0.0023	-6.36486e-11	-1.25425e-10	-2.78307e-10
		0.00232	-6.48966e-11	-1.24177e-10	-2.76435e-10
		0.00234	-6.61446e-11	-1.25425e-10	-2.74563e-10
		0.00236	-6.80166e-11	-1.24177e-10	-2.70819e-10
		0.00238	-6.80166e-11	-1.23553e-10	-2.70195e-10
		0.0024	-6.61446e-11	-1.22929e-10	-2.68323e-10
		0.00242	-6.61446e-11	-1.21057e-10	-2.68947e-10
		0.00244	-6.48966e-11	-1.21681e-10	-2.67699e-10
		0.00246	-6.48966e-11	-1.21057e-10	-2.68947e-10
		0.00248	-6.48966e-11	-1.20433e-10	-2.68323e-10
		0.0025	-6.48966e-11	-1.17937e-10	-2.68323e-10
		0.00252	-6.42726e-11	-1.17937e-10	-2.68947e-10
		0.00254	-6.30246e-11	-1.17313e-10	-2.68947e-10
		0.00256	-6.24006e-11	-1.17313e-10	-2.68323e-10
		0.00258	-6.17766e-11	-1.16689e-10	-2.69571e-10
		0.0026	-5.92806e-11	-1.16689e-10	-2.71443e-10
		0.00262	-6.30246e-11	-1.16065e-10	-2.69571e-10
		0.00264	-6.24006e-11	-1.16689e-10	-2.69571e-10
		0.00266	-6.42726e-11	-1.16689e-10	-2.68947e-10
		0.00268	-6.61446e-11	-1.17313e-10	-2.67699e-10
		0.0027	-6.73926e-11	-1.19185e-10	-2.67699e-10
		0.00272	-6.80166e-11	-1.19185e-10	-2.67699e-10
		0.00274	-6.86406e-11	-1.22305e-10	-2.67075e-10
		0.00276	-6.86406e-11	-1.22305e-10	-2.67075e-10
		0.00278	-6.61446e-11	-1.25425e-10	-2.67699e-10
		0.0028	-6.80166e-11	-1.24801e-10	-2.67075e-10
		0.00282	-6.80166e-11	-1.24801e-10	-2.6645e-10
		0.00284	-6.92646e-11	-1.23553e-10	-2.65202e-10
		0.00286	-6.92646e-11	-1.24177e-10	-2.65202e-10
		0.00288	-6.98887e-11	-1.22305e-10	-2.67699e-10
		0.0029	-7.05127e-11	-1.21681e-10	-2.67699e-10
		0.00292	-6.73926e-11	-1.21057e-10	-2.68323e-10
		0.00294	-6.55206e-11	-1.21681e-10	-2.68323e-10
		0.00296	-6.42726e-11	-1.19809e-10	-2.69571e-10
		0.00298	-6.42726e-11	-1.19185e-10	-2.68323e-10
		0.003	-6.42726e-11	-1.18561e-10	-2.68947e-10
		0.00302	-6.48966e-11	-1.17313e-10	-2.68323e-10
		0.00304	-6.36486e-11	-1.17937e-10	-2.67699e-10
		0.00306	-6.55206e-11	-1.18561e-10	-2.67699e-10
		0.00308	-6.61446e-11	-1.18561e-10	-2.68323e-10
		0.0031	-6.80166e-11	-1.19185e-10	-2.68947e-10
		0.00312	-7.05127e-11	-1.17313e-10	-2.67075e-10
		0.00314	-7.30087e-11	-1.15441e-10	-2.64578e-10
		0.00316	-7.36327e-11	-1.10449e-10	-2.59586e-10
		0.00318	-7.61287e-11	-1.09201e-10	-2.55218e-10
		0.0032	-7.98727e-11	-1.10449e-10	-2.52098e-10
		0.00322	-8.23688e-11	-1.16689e-10	-2.49602e-10
		0.00324	-8.61128e-11	-1.22929e-10	-2.5085e-10
		0.00326	-9.04808e-11	-1.36033e-10	-2.55218e-10
		0.00328	-9.54729e-11	-1.49761e-10	-2.59586e-10
		0.0033	-1.01089e-10	-1.64114e-10	-2.68323e-10
		0.00332	-1.06081e-10	-1.74722e-10	-2.75811e-10
		0.00334	-1.12945e-10	-1.80962e-10	-2.82675e-10
		0.00336	-1.16065e-10	-1.85954e-10	-2.90163e-10
		0.00338	-1.16689e-10	-1.89698e-10	-2.95779e-10
		0.0034	-1.17313e-10	-1.90322e-10	-2.99523e-10
		0.00342	-1.16689e-10	-1.9157e-10	-3.05763e-10
		0.00344	-1.12945e-10	-1.9469e-10	-3.08883e-10
		0.00346	-1.14817e-10	-1.95314e-10	-3.10755e-10
		0.00348	-1.14817e-10	-1.95938e-10	-3.12627e-10
		0.0035	-1.16689e-10	-1.9469e-10	-3.15123e-10
		0.00352	-1.19185e-10	-1.92194e-10	-3.14499e-10
		0.00354	-1.20433e-10	-1.90322e-10	-3.17619e-10
		0.00356	-1.17937e-10	-1.85954e-10	-3.19491e-10
		0.00358	-1.16689e-10	-1.83458e-10	-3.21363e-10
		0.0036	-1.14193e-10	-1.81586e-10	-3.23235e-10
		0.00362	-1.10449e-10	-1.7909e-10	-3.25107e-10
		0.00364	-1.09201e-10	-1.78466e-10	-3.26355e-10
		0.00366	-1.09201e-10	-1.77218e-10	-3.26355e-10
		0.00368	-1.08577e-10	-1.7597e-10	-3.26355e-10
		0.0037	-1.09825e-10	-1.75346e-10	-3.26355e-10
		0.00372	-1.10449e-10	-1.75346e-10	-3.25731e-10
		0.00374	-1.08577e-10	-1.74098e-10	-3.24483e-10
		0.00376	-1.07329e-10	-1.71602e-10	-3.25107e-10
		0.00378	-1.04833e-10	-1.70354e-10	-3.24483e-10
		0.0038	-1.04833e-10	-1.71602e-10	-3.25107e-10
		0.00382	-1.04209e-10	-1.70354e-10	-3.24483e-10
		0.00384	-1.04209e-10	-1.69106e-10	-3.24483e-10
		0.00386	-1.04209e-10	-1.67234e-10	-3.25731e-10
		0.00388	-1.02961e-10	-1.64738e-10	-3.26355e-10
		0.0039	-1.02337e-10	-1.64114e-10	-3.24483e-10
		0.00392	-1.00465e-10	-1.62242e-10	-3.25107e-10
		0.00394	-9.98409e-11	-1.62866e-10	-3.23235e-10
		0.00396	-9.85929e-11	-1.60993e-10	-3.21363e-10
		0.00398	-9.98409e-11	-1.62242e-10	-3.19491e-10
		0.004	-9.98409e-11	-1.61618e-10	-3.18867e-10
		0.00402	-1.01713e-10	-1.61618e-10	-3.18243e-10
		0.00404	-1.00465e-10	-1.59121e-10	-3.17619e-10
		0.00406	-9.92169e-11	-1.57873e-10	-3.17619e-10
		0.00408	-9.67209e-11	-1.56625e-10	-3.18867e-10
		0.0041	-9.42249e-11	-1.56001e-10	-3.16995e-10
		0.00412	-9.29769e-11	-1.54753e-10	-3.19491e-10
		0.00414	-9.23529e-11	-1.55377e-10	-3.17619e-10
		0.00416	-9.60969e-11	-1.52881e-10	-3.18867e-10
		0.00418	-9.79689e-11	-1.51633e-10	-3.18243e-10
		0.0042	-9.73449e-11	-1.51009e-10	-3.18867e-10
		0.00422	-9.54729e-11	-1.49761e-10	-3.18867e-10
		0.00424	-9.17289e-11	-1.49761e-10	-3.18867e-10
		0.00426	-9.04808e-11	-1.49761e-10	-3.18867e-10
		0.00428	-9.04808e-11	-1.51633e-10	-3.18243e-10
		0.0043	-9.11049e-11	-1.53505e-10	-3.16995e-10
		0.00432	-9.54729e-11	-1.54753e-10	-3.16371e-10
		0.00434	-9.79689e-11	-1.54753e-10	-3.13875e-10
		0.00436	-9.79689e-11	-1.54753e-10	-3.13251e-10
		0.00438	-9.98409e-11	-1.54753e-10	-3.12003e-10
		0.0044	-9.85929e-11	-1.55377e-10	-3.13251e-10
		0.00442	-9.60969e-11	-1.55377e-10	-3.12627e-10
		0.00444	-9.54729e-11	-1.56001e-10	-3.13251e-10
		0.00446	-9.42249e-11	-1.55377e-10	-3.13875e-10
		0.00448	-9.60969e-11	-1.54753e-10	-3.13875e-10
		0.0045	-9.60969e-11	-1.52257e-10	-3.13875e-10
		0.00452	-9.73449e-11	-1.51009e-10	-3.15747e-10
		0.00454	-9.79689e-11	-1.49137e-10	-3.14499e-10
		0.00456	-9.54729e-11	-1.47265e-10	-3.14499e-10
		0.00458	-9.42249e-11	-1.46641e-10	-3.13251e-10
		0.0046	-9.11049e-11	-1.47889e-10	-3.13251e-10
		0.00462	-8.98568e-11	-1.49137e-10	-3.12003e-10
		0.00464	-8.92328e-11	-1.49761e-10	-3.11379e-10
		0.00466	-8.98568e-11	-1.49137e-10	-3.10755e-10
		0.00468	-9.04808e-11	-1.51009e-10	-3.10755e-10
		0.0047	-9.23529e-11	-1.51009e-10	-3.09507e-10
		0.00472	-9.54729e-11	-1.51009e-10	-3.11379e-10
		0.00474	-9.60969e-11	-1.51633e-10	-3.12627e-10
		0.00476	-9.60969e-11	-1.54753e-10	-3.12627e-10
		0.00478	-9.67209e-11	-1.54753e-10	-3.13251e-10
		0.0048	-9.73449e-11	-1.55377e-10	-3.13251e-10
		0.00482	-9.73449e-11	-1.54753e-10	-3.12627e-10
		0.00484	-9.67209e-11	-1.52257e-10	-3.11379e-10
		0.00486	-9.60969e-11	-1.52257e-10	-3.10131e-10
		0.00488	-9.54729e-11	-1.48513e-10	-3.09507e-10
		0.0049	-9.23529e-11	-1.49137e-10	-3.07635e-10
		0.00492	-9.17289e-11	-1.48513e-10	-3.08259e-10
		0.00494	-8.98568e-11	-1.48513e-10	-3.08259e-10
		0.00496	-8.92328e-11	-1.47265e-10	-3.08883e-10
		0.00498	-9.04808e-11	-1.48513e-10	-3.08259e-10
		0.005	-9.17289e-11	-1.49137e-10	-3.07011e-10
		0.00502	-9.23529e-11	-1.47889e-10	-3.05763e-10
		0.00504	-9.23529e-11	-1.48513e-10	-3.04515e-10
		0.00506	-9.36009e-11	-1.47265e-10	-3.04515e-10
		0.00508	-9.23529e-11	-1.45393e-10	-3.05139e-10
		0.0051	-9.04808e-11	-1.44769e-10	-3.05139e-10
		0.00512	-9.17289e-11	-1.44145e-10	-3.06387e-10
		0.00514	-9.29769e-11	-1.44145e-10	-3.06387e-10
		0.00516	-9.48489e-11	-1.43521e-10	-3.07635e-10
		0.00518	-9.54729e-11	-1.41025e-10	-3.07011e-10
		0.0052	-9.67209e-11	-1.41025e-10	-3.07011e-10
		0.00522	-9.42249e-11	-1.40401e-10	-3.04515e-10
		0.00524	-9.04808e-11	-1.41649e-10	-3.03891e-10
		0.00526	-8.92328e-11	-1.41025e-10	-3.04515e-10
		0.00528	-8.61128e-11	-1.43521e-10	-3.05139e-10
		0.0053	-8.67368e-11	-1.46641e-10	-3.05763e-10
		0.00532	-8.79848e-11	-1.44769e-10	-3.06387e-10
		0.00534	-9.11049e-11	-1.45393e-10	-3.07635e-10
		0.00536	-9.17289e-11	-1.44145e-10	-3.07635e-10
		0.00538	-9.11049e-11	-1.45393e-10	-3.08883e-10
		0.0054	-8.98568e-11	-1.46017e-10	-3.11379e-10
		0.00542	-8.92328e-11	-1.46641e-10	-3.12003e-10
		0.00544	-8.92328e-11	-1.46641e-10	-3.12003e-10
		0.00546	-8.79848e-11	-1.49137e-10	-3.13251e-10
		0.00548	-8.98568e-11	-1.49137e-10	-3.12003e-10
		0.0055	-9.11049e-11	-1.49761e-10	-3.11379e-10
		0.00552	-9.11049e-11	-1.51009e-10	-3.09507e-10
		0.00554	-9.36009e-11	-1.47889e-10	-3.08259e-10
		0.00556	-9.29769e-11	-1.46641e-10	-3.08259e-10
		0.00558	-9.23529e-11	-1.45393e-10	-3.07011e-10
		0.0056	-9.17289e-11	-1.44769e-10	-3.05763e-10
		0.00562	-9.23529e-11	-1.43521e-10	-3.04515e-10
		0.00564	-9.04808e-11	-1.43521e-10	-3.02643e-10
		0.00566	-9.23529e-11	-1.41649e-10	-3.02019e-10
		0.00568	-9.42249e-11	-1.41649e-10	-3.02019e-10
		0.0057	-9.42249e-11	-1.42273e-10	-3.02019e-10
		0.00572	-9.54729e-11	-1.42273e-10	-3.01395e-10
		0.00574	-9.60969e-11	-1.42897e-10	-3.01395e-10
		0.00576	-9.60969e-11	-1.42273e-10	-3.02643e-10
		0.00578	-9.36009e-11	-1.45393e-10	-3.03891e-10
		0.0058	-9.11049e-11	-1.46641e-10	-3.04515e-10
		0.00582	-9.11049e-11	-1.47265e-10	-3.04515e-10
		0.00584	-8.92328e-11	-1.48513e-10	-3.04515e-10
		0.00586	-8.54888e-11	-1.47265e-10	-3.06387e-10
		0.00588	-8.42408e-11	-1.46641e-10	-3.05763e-10
		0.0059	-8.42408e-11	-1.46017e-10	-3.07011e-10
		0.00592	-8.48648e-11	-1.46017e-10	-3.08259e-10
		0.00594	-8.73608e-11	-1.44769e-10	-3.07011e-10
		0.00596	-8.98568e-11	-1.43521e-10	-3.03891e-10
		0.00598	-9.23529e-11	-1.42273e-10	-3.03267e-10
		0.006	-9.29769e-11	-1.41025e-10	-3.01395e-10
		0.00602	-9.29769e-11	-1.41025e-10	-3.00771e-10
		0.00604	-9.04808e-11	-1.40401e-10	-3.02019e-10
		0.00606	-8.98568e-11	-1.40401e-10	-3.00771e-10
		0.00608	-8.79848e-11	-1.41025e-10	-3.03267e-10
		0.0061	-8.11208e-11	-1.41025e-10	-3.03267e-10
		0.00612	-7.92487e-11	-1.41025e-10	-3.06387e-10
		0.00614	-7.98727e-11	-1.46017e-10	-3.10131e-10
		0.00616	-7.98727e-11	-1.48513e-10	-3.15123e-10
		0.00618	-7.92487e-11	-1.50385e-10	-3.18867e-10
		0.0062	-7.86247e-11	-1.49137e-10	-3.21987e-10
		0.00622	-7.61287e-11	-1.45393e-10	-3.23235e-10
		0.00624	-7.05127e-11	-1.38529e-10	-3.21987e-10
		0.00626	-6.42726e-11	-1.27921e-10	-3.18867e-10
		0.00628	-5.49125e-11	-1.17937e-10	-3.15123e-10
		0.0063	-4.92965e-11	-1.05457e-10	-3.07635e-10
		0.00632	-3.99364e-11	-9.67209e-11	-3.00771e-10
		0.00634	-3.80644e-11	-8.79848e-11	-2.92035e-10
		0.00636	-3.61923e-11	-8.23688e-11	-2.83923e-10
		0.00638	-3.49443e-11	-7.55047e-11	-2.78307e-10
		0.0064	-3.55683e-11	-7.23847e-11	-2.72067e-10
		0.00642	-3.61923e-11	-6.98887e-11	-2.67075e-10
		0.00644	-3.80644e-11	-7.11367e-11	-2.64578e-10
		0.00646	-3.80644e-11	-7.11367e-11	-2.61458e-10
		0.00648	-3.93124e-11	-7.36327e-11	-2.58338e-10
		0.0065	-3.99364e-11	-7.48807e-11	-2.55218e-10
		0.00652	-4.11844e-11	-7.42567e-11	-2.52098e-10
		0.00654	-4.30564e-11	-7.61287e-11	-2.49602e-10
		0.00656	-4.30564e-11	-7.86247e-11	-2.50226e-10
		0.00658	-4.24324e-11	-7.92487e-11	-2.48354e-10
		0.0066	-4.18084e-11	-8.11208e-11	-2.47106e-10
		0.00662	-4.24324e-11	-8.17448e-11	-2.45234e-10
		0.00664	-4.30564e-11	-8.48648e-11	-2.45234e-10
		0.00666	-4.43044e-11	-8.48648e-11	-2.45234e-10
		0.00668	-4.43044e-11	-8.67368e-11	-2.43986e-10
		0.0067	-4.43044e-11	-8.61128e-11	-2.45234e-10
		0.00672	-4.55524e-11	-8.73608e-11	-2.45858e-10
		0.00674	-4.36804e-11	-8.92328e-11	-2.45858e-10
		0.00676	-4.43044e-11	-9.23529e-11	-2.47106e-10
		0.00678	-4.36804e-11	-9.67209e-11	-2.4773e-10
		0.0068	-4.43044e-11	-9.79689e-11	-2.4773e-10
		0.00682	-4.61764e-11	-1.01089e-10	-2.46482e-10
		0.00684	-4.86725e-11	-1.02337e-10	-2.45858e-10
		0.00686	-5.17925e-11	-1.03585e-10	-2.46482e-10
		0.00688	-5.30405e-11	-1.01713e-10	-2.45234e-10
		0.0069	-5.36645e-11	-1.01089e-10	-2.47106e-10
		0.00692	-5.30405e-11	-1.00465e-10	-2.46482e-10
		0.00694	-5.49125e-11	-9.85929e-11	-2.46482e-10
		0.00696	-5.24165e-11	-9.79689e-11	-2.47106e-10
		0.00698	-5.17925e-11	-9.85929e-11	-2.46482e-10
		0.007	-5.17925e-11	-9.98409e-11	-2.45858e-10
		0.00702	-5.11685e-11	-1.00465e-10	-2.4461e-10
		0.00704	-5.05445e-11	-9.98409e-11	-2.46482e-10
		0.00706	-4.99205e-11	-1.01089e-10	-2.4773e-10
		0.00708	-4.92965e-11	-9.92169e-11	-2.49602e-10
		0.0071	-4.74244e-11	-1.01713e-10	-2.49602e-10
		0.00712	-4.74244e-11	-1.02337e-10	-2.50226e-10
		0.00714	-4.55524e-11	-1.02961e-10	-2.48978e-10
		0.00716	-4.92965e-11	-1.06081e-10	-2.4773e-10
		0.00718	-5.05445e-11	-1.03585e-10	-2.45858e-10
		0.0072	-5.30405e-11	-1.04209e-10	-2.46482e-10
		0.00722	-5.49125e-11	-1.03585e-10	-2.47106e-10
		0.00724	-5.61605e-11	-1.03585e-10	-2.5085e-10
		0.00726	-5.67845e-11	-1.02961e-10	-2.52722e-10
		0.00728	-5.67845e-11	-1.04209e-10	-2.55842e-10
		0.0073	-5.74085e-11	-1.04833e-10	-2.55218e-10
		0.00732	-5.74085e-11	-1.06081e-10	-2.55842e-10
		0.00734	-5.74085e-11	-1.05457e-10	-2.54594e-10
		0.00736	-5.80325e-11	-1.06705e-10	-2.5397e-10
		0.00738	-5.80325e-11	-1.04833e-10	-2.52098e-10
		0.0074	-5.61605e-11	-1.06081e-10	-2.5397e-10
		0.00742	-5.74085e-11	-1.06705e-10	-2.54594e-10
		0.00744	-5.42885e-11	-1.07953e-10	-2.5397e-10
		0.00746	-5.55365e-11	-1.08577e-10	-2.53346e-10
		0.00748	-5.36645e-11	-1.09201e-10	-2.52098e-10
		0.0075	-5.42885e-11	-1.07953e-10	-2.52722e-10
		0.00752	-5.49125e-11	-1.07329e-10	-2.5397e-10
		0.00754	-5.55365e-11	-1.06705e-10	-2.54594e-10
		0.00756	-5.74085e-11	-1.07329e-10	-2.55218e-10
		0.00758	-5.61605e-11	-1.08577e-10	-2.56466e-10
		0.0076	-5.67845e-11	-1.07953e-10	-2.56466e-10
		0.00762	-5.67845e-11	-1.09825e-10	-2.56466e-10
		0.00764	-5.67845e-11	-1.09825e-10	-2.56466e-10
		0.00766	-5.92806e-11	-1.11697e-10	-2.57714e-10
		0.00768	-6.11526e-11	-1.11073e-10	-2.56466e-10
		0.0077	-6.11526e-11	-1.09825e-10	-2.5709e-10
		0.00772	-6.24006e-11	-1.11073e-10	-2.57714e-10
		0.00774	-6.24006e-11	-1.11697e-10	-2.5709e-10
		0.00776	-6.17766e-11	-1.12321e-10	-2.58338e-10
		0.00778	-6.17766e-11	-1.13569e-10	-2.59586e-10
		0.0078	-5.99046e-11	-1.11697e-10	-2.58338e-10
		0.00782	-5.92806e-11	-1.14193e-10	-2.5709e-10
		0.00784	-5.80325e-11	-1.13569e-10	-2.57714e-10
		0.00786	-5.80325e-11	-1.13569e-10	-2.5709e-10
		0.00788	-5.74085e-11	-1.11073e-10	-2.56466e-10
		0.0079	-5.74085e-11	-1.11073e-10	-2.58338e-10
		0.00792	-5.80325e-11	-1.11073e-10	-2.58962e-10
		0.00794	-5.55365e-11	-1.11073e-10	-2.59586e-10
		0.00796	-5.49125e-11	-1.11697e-10	-2.60834e-10
		0.00798	-5.42885e-11	-1.11073e-10	-2.6021e-10
		0.008	-5.55365e-11	-1.12321e-10	-2.57714e-10
		0.00802	-5.74085e-11	-1.10449e-10	-2.5709e-10
		0.00804	-5.80325e-11	-1.09825e-10	-2.56466e-10
		0.00806	-5.67845e-11	-1.08577e-10	-2.57714e-10
		0.00808	-5.67845e-11	-1.09201e-10	-2.5709e-10
		0.0081	-5.61605e-11	-1.11073e-10	-2.56466e-10
		0.00812	-5.61605e-11	-1.12945e-10	-2.5709e-10
		0.00814	-5.61605e-11	-1.14193e-10	-2.58338e-10
		0.00816	-5.74085e-11	-1.16689e-10	-2.60834e-10
		0.00818	-5.92806e-11	-1.17313e-10	-2.61458e-10
		0.0082	-6.05286e-11	-1.17313e-10	-2.61458e-10
		0.00822	-5.86565e-11	-1.16689e-10	-2.6333e-10
		0.00824	-6.05286e-11	-1.14817e-10	-2.60834e-10
		0.00826	-5.92806e-11	-1.14817e-10	-2.61458e-10
		0.00828	-5.92806e-11	-1.13569e-10	-2.60834e-10
		0.0083	-5.92806e-11	-1.15441e-10	-2.6021e-10
		0.00832	-5.99046e-11	-1.15441e-10	-2.60834e-10
		0.00834	-5.86565e-11	-1.13569e-10	-2.60834e-10
		0.00836	-5.86565e-11	-1.09825e-10	-2.61458e-10
		0.00838	-5.74085e-11	-1.09201e-10	-2.62082e-10
		0.0084	-5.55365e-11	-1.07953e-10	-2.6333e-10
		0.00842	-5.49125e-11	-1.07953e-10	-2.64578e-10
		0.00844	-5.49125e-11	-1.09825e-10	-2.64578e-10
		0.00846	-5.42885e-11	-1.09825e-10	-2.65202e-10
		0.00848	-5.49125e-11	-1.11073e-10	-2.63954e-10
		0.0085	-5.74085e-11	-1.11697e-10	-2.6645e-10
		0.00852	-5.86565e-11	-1.11697e-10	-2.65826e-10
		0.00854	-5.80325e-11	-1.11073e-10	-2.65826e-10
		0.00856	-5.92806e-11	-1.11697e-10	-2.6645e-10
		0.00858	-5.92806e-11	-1.11697e-10	-2.62706e-10
		0.0086	-5.99046e-11	-1.12321e-10	-2.62706e-10
		0.00862	-6.05286e-11	-1.11073e-10	-2.62082e-10
		0.00864	-5.99046e-11	-1.12321e-10	-2.62082e-10
		0.00866	-6.05286e-11	-1.12321e-10	-2.62082e-10
		0.00868	-6.05286e-11	-1.12321e-10	-2.63954e-10
		0.0087	-6.05286e-11	-1.12321e-10	-2.63954e-10
		0.00872	-6.05286e-11	-1.14193e-10	-2.62082e-10
		0.00874	-5.99046e-11	-1.15441e-10	-2.60834e-10
		0.00876	-5.99046e-11	-1.16065e-10	-2.61458e-10
		0.00878	-5.92806e-11	-1.17313e-10	-2.62082e-10
		0.0088	-5.92806e-11	-1.17937e-10	-2.62082e-10
		0.00882	-5.92806e-11	-1.17313e-10	-2.6333e-10
		0.00884	-5.99046e-11	-1.17313e-10	-2.64578e-10
		0.00886	-6.30246e-11	-1.15441e-10	-2.6333e-10
		0.00888	-6.36486e-11	-1.14193e-10	-2.6333e-10
		0.0089	-6.42726e-11	-1.12321e-10	-2.6333e-10
		0.00892	-6.36486e-11	-1.10449e-10	-2.63954e-10
		0.00894	-6.48966e-11	-1.12321e-10	-2.63954e-10
		0.00896	-6.42726e-11	-1.14817e-10	-2.62706e-10
		0.00898	-6.42726e-11	-1.13569e-10	-2.6333e-10
		0.009	-6.42726e-11	-1.15441e-10	-2.62706e-10
		0.00902	-6.48966e-11	-1.16065e-10	-2.6333e-10
		0.00904	-6.30246e-11	-1.16065e-10	-2.62706e-10
		0.00906	-6.17766e-11	-1.15441e-10	-2.63954e-10
		0.00908	-6.05286e-11	-1.16065e-10	-2.62706e-10
		0.0091	-5.67845e-11	-1.17313e-10	-2.63954e-10
		0.00912	-5.55365e-11	-1.16689e-10	-2.64578e-10
		0.00914	-5.36645e-11	-1.16689e-10	-2.62082e-10
		0.00916	-5.30405e-11	-1.17313e-10	-2.60834e-10
		0.00918	-5.61605e-11	-1.16065e-10	-2.6021e-10
		0.0092	-5.99046e-11	-1.16065e-10	-2.58338e-10
		0.00922	-5.92806e-11	-1.15441e-10	-2.6021e-10
		0.00924	-6.05286e-11	-1.14817e-10	-2.6021e-10
		0.00926	-5.99046e-11	-1.16065e-10	-2.61458e-10
		0.00928	-5.80325e-11	-1.15441e-10	-2.62706e-10
		0.0093	-5.92806e-11	-1.15441e-10	-2.63954e-10
		0.00932	-5.86565e-11	-1.14817e-10	-2.62082e-10
		0.00934	-5.99046e-11	-1.14193e-10	-2.61458e-10
		0.00936	-5.99046e-11	-1.14193e-10	-2.60834e-10
		0.00938	-6.24006e-11	-1.12945e-10	-2.60834e-10
		0.0094	-6.42726e-11	-1.13569e-10	-2.62082e-10
		0.00942	-6.48966e-11	-1.13569e-10	-2.62082e-10
		0.00944	-6.36486e-11	-1.14817e-10	-2.62082e-10
		0.00946	-6.36486e-11	-1.17937e-10	-2.62706e-10
		0.00948	-6.17766e-11	-1.19809e-10	-2.62082e-10
		0.0095	-5.99046e-11	-1.20433e-10	-2.62706e-10
		0.00952	-5.92806e-11	-1.18561e-10	-2.61458e-10
		0.00954	-5.86565e-11	-1.19185e-10	-2.62082e-10
		0.00956	-5.86565e-11	-1.17937e-10	-2.6333e-10
		0.00958	-5.67845e-11	-1.17313e-10	-2.61458e-10
		0.0096	-5.92806e-11	-1.18561e-10	-2.62706e-10
		0.00962	-5.92806e-11	-1.17937e-10	-2.61458e-10
		0.00964	-6.05286e-11	-1.19809e-10	-2.61458e-10
		0.00966	-6.11526e-11	-1.19809e-10	-2.58338e-10
		0.00968	-6.17766e-11	-1.21057e-10	-2.6021e-10
		0.0097	-6.36486e-11	-1.20433e-10	-2.6021e-10
		0.00972	-6.55206e-11	-1.21057e-10	-2.60834e-10
		0.00974	-6.48966e-11	-1.19809e-10	-2.62082e-10
		0.00976	-6.61446e-11	-1.17937e-10	-2.62706e-10
		0.00978	-6.42726e-11	-1.16689e-10	-2.65202e-10
		0.0098	-6.24006e-11	-1.16689e-10	-2.64578e-10
		0.00982	-6.24006e-11	-1.16065e-10	-2.65826e-10
		0.00984	-6.24006e-11	-1.16065e-10	-2.6645e-10
		0.00986	-6.42726e-11	-1.17313e-10	-2.65826e-10
		0.00988	-6.42726e-11	-1.17313e-10	-2.63954e-10
		0.0099	-6.48966e-11	-1.19185e-10	-2.63954e-10
		0.00992	-6.55206e-11	-1.17937e-10	-2.64578e-10
		0.00994	-6.55206e-11	-1.19809e-10	-2.65202e-10
		0.00996	-6.55206e-11	-1.22305e-10	-2.64578e-10
		0.00998	-6.36486e-11	-1.22929e-10	-2.6645e-10
		0.01	-6.11526e-11	-1.22305e-10	-2.64578e-10
		0.01002	-5.99046e-11	-1.21681e-10	-2.65202e-10
		0.01004	-5.86565e-11	-1.17937e-10	-2.64578e-10
		0.01006	-5.92806e-11	-1.16065e-10	-2.6333e-10
		0.01008	-5.86565e-11	-1.16065e-10	-2.6333e-10
		0.0101	-5.74085e-11	-1.14817e-10	-2.62082e-10
		0.01012	-5.86565e-11	-1.17313e-10	-2.60834e-10
		0.01014	-5.74085e-11	-1.19185e-10	-2.61458e-10
		0.01016	-5.99046e-11	-1.19809e-10	-2.60834e-10
		0.01018	-6.24006e-11	-1.19185e-10	-2.6021e-10
		0.0102	-6.24006e-11	-1.19809e-10	-2.59586e-10
		0.01022	-6.42726e-11	-1.19185e-10	-2.58962e-10
		0.01024	-6.42726e-11	-1.17313e-10	-2.61458e-10
		0.01026	-6.36486e-11	-1.16689e-10	-2.61458e-10
		0.01028	-6.42726e-11	-1.17313e-10	-2.62082e-10
		0.0103	-6.24006e-11	-1.17313e-10	-2.64578e-10
		0.01032	-6.05286e-11	-1.17937e-10	-2.65202e-10
		0.01034	-6.17766e-11	-1.16065e-10	-2.65202e-10
		0.01036	-6.05286e-11	-1.17313e-10	-2.65826e-10
		0.01038	-6.05286e-11	-1.17937e-10	-2.67075e-10
		0.0104	-6.11526e-11	-1.19809e-10	-2.65202e-10
		0.01042	-5.86565e-11	-1.20433e-10	-2.6645e-10
		0.01044	-5.61605e-11	-1.18561e-10	-2.65202e-10
		0.01046	-5.55365e-11	-1.19809e-10	-2.63954e-10
		0.01048	-5.67845e-11	-1.16689e-10	-2.6333e-10
		0.0105	-5.92806e-11	-1.16689e-10	-2.6021e-10
		0.01052	-6.11526e-11	-1.16689e-10	-2.58962e-10
		0.01054	-6.24006e-11	-1.18561e-10	-2.6021e-10
		0.01056	-6.30246e-11	-1.19185e-10	-2.60834e-10
		0.01058	-6.17766e-11	-1.18561e-10	-2.60834e-10
		0.0106	-6.05286e-11	-1.16689e-10	-2.62082e-10
		0.01062	-5.92806e-11	-1.14817e-10	-2.62082e-10
		0.01064	-5.99046e-11	-1.13569e-10	-2.60834e-10
		0.01066	-6.11526e-11	-1.14193e-10	-2.60834e-10
		0.01068	-6.36486e-11	-1.12945e-10	-2.60834e-10
		0.0107	-6.55206e-11	-1.14817e-10	-2.62082e-10
		0.01072	-6.73926e-11	-1.16065e-10	-2.62082e-10
		0.01074	-6.86406e-11	-1.17313e-10	-2.62706e-10
		0.01076	-6.61446e-11	-1.19185e-10	-2.62706e-10
		0.01078	-6.42726e-11	-1.19809e-10	-2.62706e-10
		0.0108	-6.36486e-11	-1.21681e-10	-2.62082e-10
		0.01082	-6.24006e-11	-1.21057e-10	-2.60834e-10
		0.01084	-6.11526e-11	-1.21681e-10	-2.60834e-10
		0.01086	-6.05286e-11	-1.20433e-10	-2.62082e-10
		0.01088	-6.05286e-11	-1.19185e-10	-2.6333e-10
		0.0109	-5.92806e-11	-1.18561e-10	-2.65826e-10
		0.01092	-5.74085e-11	-1.18561e-10	-2.6645e-10
		0.01094	-5.61605e-11	-1.18561e-10	-2.6645e-10
		0.01096	-5.55365e-11	-1.20433e-10	-2.67075e-10
		0.01098	-5.55365e-11	-1.19809e-10	-2.6645e-10
		0.011	-5.61605e-11	-1.20433e-10	-2.65202e-10
		0.01102	-5.49125e-11	-1.20433e-10	-2.6333e-10
		0.01104	-5.61605e-11	-1.19185e-10	-2.61458e-10
		0.01106	-5.74085e-11	-1.17313e-10	-2.62082e-10
		0.01108	-5.80325e-11	-1.15441e-10	-2.62706e-10
		0.0111	-5.99046e-11	-1.12321e-10	-2.61458e-10
		0.01112	-6.05286e-11	-1.12321e-10	-2.6333e-10
		0.01114	-6.17766e-11	-1.12945e-10	-2.63954e-10
		0.01116	-6.24006e-11	-1.13569e-10	-2.63954e-10
		0.01118	-6.11526e-11	-1.12945e-10	-2.6333e-10
		0.0112	-6.11526e-11	-1.14817e-10	-2.62082e-10
		0.01122	-6.05286e-11	-1.16689e-10	-2.60834e-10
		0.01124	-6.05286e-11	-1.19185e-10	-2.6333e-10
		0.01126	-5.80325e-11	-1.19185e-10	-2.64578e-10
		0.01128	-5.80325e-11	-1.21057e-10	-2.65202e-10
		0.0113	-5.49125e-11	-1.18561e-10	-2.65202e-10
		0.01132	-5.67845e-11	-1.17937e-10	-2.65202e-10
		0.01134	-5.74085e-11	-1.17313e-10	-2.6333e-10
		0.01136	-5.92806e-11	-1.17313e-10	-2.63954e-10
		0.01138	-6.11526e-11	-1.17313e-10	-2.64578e-10
		0.0114	-6.24006e-11	-1.17937e-10	-2.65202e-10
		0.01142	-6.48966e-11	-1.19809e-10	-2.64578e-10
		0.01144	-6.36486e-11	-1.20433e-10	-2.65202e-10
		0.01146	-6.42726e-11	-1.19185e-10	-2.67699e-10
		0.01148	-6.48966e-11	-1.17937e-10	-2.65202e-10
		0.0115	-6.55206e-11	-1.15441e-10	-2.64578e-10
		0.01152	-6.67686e-11	-1.14817e-10	-2.65202e-10
		0.01154	-6.55206e-11	-1.14817e-10	-2.63954e-10
		0.01156	-6.48966e-11	-1.14817e-10	-2.65202e-10
		0.01158	-6.61446e-11	-1.16065e-10	-2.64578e-10
		0.0116	-6.61446e-11	-1.17937e-10	-2.6645e-10
		0.01162	-6.42726e-11	-1.20433e-10	-2.6645e-10
		0.01164	-6.36486e-11	-1.19185e-10	-2.65202e-10
		0.01166	-6.17766e-11	-1.18561e-10	-2.65202e-10
		0.01168	-6.11526e-11	-1.17937e-10	-2.64578e-10
		0.0117	-6.05286e-11	-1.17937e-10	-2.63954e-10
		0.01172	-6.17766e-11	-1.17937e-10	-2.63954e-10
		0.01174	-6.17766e-11	-1.17313e-10	-2.63954e-10
		0.01176	-6.05286e-11	-1.16689e-10	-2.65826e-10
		0.01178	-6.05286e-11	-1.17313e-10	-2.65826e-10
		0.0118	-6.05286e-11	-1.17313e-10	-2.67699e-10
		0.01182	-5.92806e-11	-1.17937e-10	-2.68323e-10
		0.01184	-5.99046e-11	-1.17313e-10	-2.67075e-10
		0.01186	-5.99046e-11	-1.16689e-10	-2.67699e-10
		0.01188	-6.11526e-11	-1.16689e-10	-2.68323e-10
		0.0119	-5.92806e-11	-1.14817e-10	-2.67075e-10
		0.01192	-5.86565e-11	-1.14193e-10	-2.65826e-10
		0.01194	-5.80325e-11	-1.13569e-10	-2.6645e-10
		0.01196	-5.74085e-11	-1.16065e-10	-2.67075e-10
		0.01198	-5.80325e-11	-1.17313e-10	-2.67075e-10
		0.012	-5.86565e-11	-1.18561e-10	-2.65202e-10
		0.01202	-6.17766e-11	-1.20433e-10	-2.64578e-10
		0.01204	-6.24006e-11	-1.20433e-10	-2.62082e-10
		0.01206	-6.24006e-11	-1.19809e-10	-2.63954e-10
		0.01208	-6.36486e-11	-1.17937e-10	-2.60834e-10
		0.0121	-6.17766e-11	-1.16689e-10	-2.62082e-10
		0.01212	-6.05286e-11	-1.16065e-10	-2.62082e-10
		0.01214	-6.24006e-11	-1.15441e-10	-2.60834e-10
		0.01216	-6.36486e-11	-1.14193e-10	-2.62706e-10
		0.01218	-6.24006e-11	-1.14817e-10	-2.63954e-10
		0.0122	-6.42726e-11	-1.14193e-10	-2.65202e-10
		0.01222	-6.36486e-11	-1.15441e-10	-2.65826e-10
		0.01224	-6.24006e-11	-1.15441e-10	-2.67075e-10
		0.01226	-6.17766e-11	-1.17937e-10	-2.6645e-10
		0.01228	-6.17766e-11	-1.21057e-10	-2.68323e-10
		0.0123	-6.05286e-11	-1.19809e-10	-2.65202e-10
		0.01232	-6.05286e-11	-1.21057e-10	-2.65202e-10
		0.01234	-6.42726e-11	-1.19185e-10	-2.64578e-10
		0.01236	-6.48966e-11	-1.17313e-10	-2.63954e-10
		0.01238	-6.48966e-11	-1.16065e-10	-2.65202e-10
		0.0124	-6.30246e-11	-1.15441e-10	-2.6645e-10
		0.01242	-6.17766e-11	-1.15441e-10	-2.68947e-10
		0.01244	-6.36486e-11	-1.16065e-10	-2.67699e-10
		0.01246	-6.42726e-11	-1.16689e-10	-2.68323e-10
		0.01248	-6.48966e-11	-1.17313e-10	-2.65826e-10
		0.0125	-6.61446e-11	-1.18561e-10	-2.65202e-10
		0.01252	-6.61446e-11	-1.18561e-10	-2.65202e-10
		0.01254	-6.61446e-11	-1.15441e-10	-2.6645e-10
		0.01256	-6.48966e-11	-1.13569e-10	-2.6645e-10
		0.01258	-6.48966e-11	-1.12321e-10	-2.67699e-10
		0.0126	-6.55206e-11	-1.12321e-10	-2.67699e-10
		0.01262	-6.17766e-11	-1.11697e-10	-2.67075e-10
		0.01264	-6.17766e-11	-1.16065e-10	-2.67075e-10
		0.01266	-6.11526e-11	-1.17313e-10	-2.65826e-10
		0.01268	-6.11526e-11	-1.17937e-10	-2.6333e-10
		0.0127	-6.11526e-11	-1.19809e-10	-2.62706e-10
		0.01272	-6.05286e-11	-1.18561e-10	-2.65202e-10
		0.01274	-6.05286e-11	-1.19185e-10	-2.63954e-10
		0.01276	-6.24006e-11	-1.19809e-10	-2.64578e-10
		0.01278	-6.17766e-11	-1.17313e-10	-2.6645e-10
		0.0128	-6.36486e-11	-1.19809e-10	-2.65202e-10
		0.01282	-6.36486e-11	-1.19809e-10	-2.67075e-10
		0.01284	-6.42726e-11	-1.21681e-10	-2.68323e-10
		0.01286	-6.42726e-11	-1.22305e-10	-2.68323e-10
		0.01288	-6.30246e-11	-1.22305e-10	-2.68947e-10
		0.0129	-6.24006e-11	-1.21681e-10	-2.69571e-10
		0.01292	-6.11526e-11	-1.20433e-10	-2.68947e-10
		0.01294	-6.05286e-11	-1.18561e-10	-2.68947e-10
		0.01296	-5.99046e-11	-1.19185e-10	-2.67699e-10
		0.01298	-5.99046e-11	-1.19185e-10	-2.69571e-10
		0.013	-6.17766e-11	-1.17937e-10	-2.67075e-10
		0.01302	-6.42726e-11	-1.15441e-10	-2.67075e-10
		0.01304	-6.36486e-11	-1.15441e-10	-2.6645e-10
		0.01306	-6.36486e-11	-1.14817e-10	-2.6645e-10
		0.01308	-6.48966e-11	-1.16065e-10	-2.6645e-10
		0.0131	-6.48966e-11	-1.17313e-10	-2.65826e-10
		0.01312	-6.30246e-11	-1.17937e-10	-2.6645e-10
		0.01314	-6.30246e-11	-1.17313e-10	-2.6645e-10
		0.01316	-6.30246e-11	-1.18561e-10	-2.6645e-10
		0.01318	-6.30246e-11	-1.17313e-10	-2.64578e-10
		0.0132	-6.24006e-11	-1.15441e-10	-2.65826e-10
		0.01322	-6.17766e-11	-1.14817e-10	-2.65202e-10
		0.01324	-5.99046e-11	-1.14817e-10	-2.65202e-10
		0.01326	-5.86565e-11	-1.12945e-10	-2.65826e-10
		0.01328	-5.86565e-11	-1.11697e-10	-2.6645e-10
		0.0133	-5.74085e-11	-1.09825e-10	-2.68323e-10
		0.01332	-5.92806e-11	-1.11697e-10	-2.65202e-10
		0.01334	-5.99046e-11	-1.14193e-10	-2.64578e-10
		0.01336	-5.92806e-11	-1.16065e-10	-2.65202e-10
		0.01338	-6.24006e-11	-1.15441e-10	-2.63954e-10
		0.0134	-6.30246e-11	-1.15441e-10	-2.64578e-10
		0.01342	-6.30246e-11	-1.16065e-10	-2.6645e-10
		0.01344	-6.61446e-11	-1.16065e-10	-2.65826e-10
		0.01346	-6.73926e-11	-1.14817e-10	-2.65826e-10
		0.01348	-6.61446e-11	-1.14817e-10	-2.64578e-10
		0.0135	-6.55206e-11	-1.13569e-10	-2.65202e-10
		0.01352	-6.61446e-11	-1.11697e-10	-2.6333e-10
		0.01354	-6.48966e-11	-1.11697e-10	-2.6333e-10
		0.01356	-6.42726e-11	-1.12945e-10	-2.65202e-10
		0.01358	-6.17766e-11	-1.16065e-10	-2.65202e-10
		0.0136	-6.17766e-11	-1.17937e-10	-2.65826e-10
		0.01362	-6.05286e-11	-1.18561e-10	-2.65202e-10
		0.01364	-6.11526e-11	-1.19809e-10	-2.64578e-10
		0.01366	-6.05286e-11	-1.20433e-10	-2.65826e-10
		0.01368	-6.11526e-11	-1.19809e-10	-2.64578e-10
		0.0137	-6.11526e-11	-1.21057e-10	-2.65202e-10
		0.01372	-5.99046e-11	-1.21057e-10	-2.65826e-10
		0.01374	-6.05286e-11	-1.20433e-10	-2.67075e-10
		0.01376	-6.17766e-11	-1.21681e-10	-2.67075e-10
		0.01378	-6.11526e-11	-1.21057e-10	-2.67075e-10
		0.0138	-6.30246e-11	-1.21681e-10	-2.67699e-10
		0.01382	-6.42726e-11	-1.20433e-10	-2.68323e-10
		0.01384	-6.61446e-11	-1.21057e-10	-2.67699e-10
		0.01386	-6.73926e-11	-1.21057e-10	-2.65202e-10
		0.01388	-6.80166e-11	-1.22929e-10	-2.63954e-10
		0.0139	-6.67686e-11	-1.21057e-10	-2.6333e-10
		0.01392	-6.42726e-11	-1.21057e-10	-2.62706e-10
		0.01394	-6.24006e-11	-1.22305e-10	-2.62706e-10
		0.01396	-6.11526e-11	-1.21057e-10	-2.62082e-10
		0.01398	-5.99046e-11	-1.19809e-10	-2.62706e-10
		0.014	-5.92806e-11	-1.19809e-10	-2.62082e-10
		0.01402	-5.74085e-11	-1.18561e-10	-2.61458e-10
		0.01404	-5.74085e-11	-1.18561e-10	-2.6021e-10
		0.01406	-5.67845e-11	-1.17937e-10	-2.60834e-10
		0.01408	-5.55365e-11	-1.16689e-10	-2.61458e-10
		0.0141	-5.74085e-11	-1.17313e-10	-2.63954e-10
		0.01412	-5.86565e-11	-1.17313e-10	-2.63954e-10
		0.01414	-5.92806e-11	-1.17313e-10	-2.63954e-10
		0.01416	-6.24006e-11	-1.17937e-10	-2.63954e-10
		0.01418	-6.48966e-11	-1.16065e-10	-2.64578e-10
		0.0142	-6.73926e-11	-1.17313e-10	-2.63954e-10
		0.01422	-6.55206e-11	-1.14193e-10	-2.64578e-10
		0.01424	-6.42726e-11	-1.15441e-10	-2.62706e-10
		0.01426	-6.36486e-11	-1.16065e-10	-2.6333e-10
		0.01428	-6.30246e-11	-1.17313e-10	-2.65202e-10
		0.0143	-6.24006e-11	-1.16689e-10	-2.63954e-10
		0.01432	-6.42726e-11	-1.17313e-10	-2.6333e-10
		0.01434	-6.30246e-11	-1.17937e-10	-2.63954e-10
		0.01436	-6.42726e-11	-1.17313e-10	-2.61458e-10
		0.01438	-6.55206e-11	-1.19185e-10	-2.6021e-10
		0.0144	-6.55206e-11	-1.21057e-10	-2.61458e-10
		0.01442	-6.48966e-11	-1.22305e-10	-2.61458e-10
		0.01444	-6.61446e-11	-1.25425e-10	-2.62082e-10
		0.01446	-6.80166e-11	-1.25425e-10	-2.63954e-10
		0.01448	-6.80166e-11	-1.24801e-10	-2.65202e-10
		0.0145	-6.48966e-11	-1.23553e-10	-2.6645e-10
		0.01452	-6.55206e-11	-1.21057e-10	-2.67699e-10
		0.01454	-6.42726e-11	-1.19185e-10	-2.67075e-10
		0.01456	-6.05286e-11	-1.18561e-10	-2.6645e-10
		0.01458	-5.92806e-11	-1.16065e-10	-2.6645e-10
		0.0146	-5.92806e-11	-1.17937e-10	-2.6645e-10
		0.01462	-5.99046e-11	-1.16065e-10	-2.64578e-10
		0.01464	-5.99046e-11	-1.17937e-10	-2.67075e-10
		0.01466	-6.05286e-11	-1.18561e-10	-2.67699e-10
		0.01468	-6.24006e-11	-1.19809e-10	-2.6645e-10
		0.0147	-6.36486e-11	-1.19809e-10	-2.67699e-10
		0.01472	-6.24006e-11	-1.20433e-10	-2.64578e-10
		0.01474	-6.11526e-11	-1.22305e-10	-2.65202e-10
		0.01476	-6.24006e-11	-1.25425e-10	-2.67075e-10
		0.01478	-6.36486e-11	-1.26049e-10	-2.6645e-10
		0.0148	-6.36486e-11	-1.24801e-10	-2.65826e-10
		0.01482	-6.48966e-11	-1.24801e-10	-2.65826e-10
		0.01484	-6.48966e-11	-1.22305e-10	-2.65202e-10
		0.01486	-6.55206e-11	-1.22305e-10	-2.65202e-10
		0.01488	-6.55206e-11	-1.20433e-10	-2.65826e-10
		0.0149	-6.48966e-11	-1.20433e-10	-2.65202e-10
		0.01492	-6.42726e-11	-1.19185e-10	-2.67075e-10
		0.01494	-6.42726e-11	-1.20433e-10	-2.69571e-10
		0.01496	-6.30246e-11	-1.20433e-10	-2.68947e-10
		0.01498	-6.36486e-11	-1.21057e-10	-2.68323e-10
		0.015	-6.30246e-11	-1.19185e-10	-2.67075e-10
		0.01502	-6.36486e-11	-1.18561e-10	-2.6645e-10
		0.01504	-6.30246e-11	-1.18561e-10	-2.65826e-10
		0.01506	-5.99046e-11	-1.18561e-10	-2.65202e-10
		0.01508	-6.17766e-11	-1.17313e-10	-2.65202e-10
		0.0151	-6.11526e-11	-1.19185e-10	-2.65826e-10
		0.01512	-6.11526e-11	-1.19185e-10	-2.6645e-10
		0.01514	-5.99046e-11	-1.21057e-10	-2.68323e-10
		0.01516	-6.11526e-11	-1.21057e-10	-2.68323e-10
		0.01518	-6.11526e-11	-1.21681e-10	-2.70195e-10
		0.0152	-6.05286e-11	-1.21057e-10	-2.71443e-10
		0.01522	-6.11526e-11	-1.21681e-10	-2.73939e-10
		0.01524	-6.11526e-11	-1.21681e-10	-2.74563e-10
		0.01526	-6.11526e-11	-1.21681e-10	-2.75187e-10
		0.01528	-6.30246e-11	-1.21681e-10	-2.75187e-10
		0.0153	-6.24006e-11	-1.21681e-10	-2.75187e-10
		0.01532	-6.24006e-11	-1.22305e-10	-2.74563e-10
		0.01534	-6.48966e-11	-1.21057e-10	-2.74563e-10
		0.01536	-6.61446e-11	-1.22305e-10	-2.73939e-10
		0.01538	-6.55206e-11	-1.21681e-10	-2.72067e-10
		0.0154	-6.48966e-11	-1.23553e-10	-2.71443e-10
		0.01542	-6.36486e-11	-1.23553e-10	-2.71443e-10
		0.01544	-6.17766e-11	-1.24177e-10	-2.71443e-10
		0.01546	-6.30246e-11	-1.22929e-10	-2.70195e-10
		0.01548	-6.42726e-11	-1.21057e-10	-2.68947e-10
		0.0155	-6.67686e-11	-1.20433e-10	-2.68947e-10
		0.01552	-6.67686e-11	-1.19185e-10	-2.67699e-10
		0.01554	-6.67686e-11	-1.19809e-10	-2.65826e-10
		0.01556	-6.55206e-11	-1.16689e-10	-2.65826e-10
		0.01558	-6.24006e-11	-1.19185e-10	-2.65826e-10
		0.0156	-5.99046e-11	-1.18561e-10	-2.6645e-10
		0.01562	-5.99046e-11	-1.21057e-10	-2.6645e-10
		0.01564	-5.86565e-11	-1.22305e-10	-2.6645e-10
		0.01566	-6.17766e-11	-1.21681e-10	-2.67699e-10
		0.01568	-6.17766e-11	-1.19809e-10	-2.65826e-10
		0.0157	-6.24006e-11	-1.21057e-10	-2.65202e-10
		0.01572	-6.30246e-11	-1.21057e-10	-2.67075e-10
		0.01574	-6.24006e-11	-1.19809e-10	-2.67699e-10
		0.01576	-6.30246e-11	-1.20433e-10	-2.68323e-10
		0.01578	-6.17766e-11	-1.20433e-10	-2.70819e-10
		0.0158	-6.11526e-11	-1.20433e-10	-2.69571e-10
		0.01582	-6.24006e-11	-1.20433e-10	-2.69571e-10
		0.01584	-6.48966e-11	-1.21057e-10	-2.68323e-10
		0.01586	-6.55206e-11	-1.18561e-10	-2.68323e-10
		0.01588	-6.30246e-11	-1.17313e-10	-2.67075e-10
		0.0159	-6.42726e-11	-1.17313e-10	-2.67075e-10
		0.01592	-6.30246e-11	-1.18561e-10	-2.68947e-10
		0.01594	-6.24006e-11	-1.20433e-10	-2.71443e-10
		0.01596	-6.17766e-11	-1.22305e-10	-2.70819e-10
		0.01598	-6.48966e-11	-1.23553e-10	-2.71443e-10
		0.016	-6.48966e-11	-1.24177e-10	-2.70819e-10
		0.01602	-6.61446e-11	-1.25425e-10	-2.70819e-10
		0.01604	-6.36486e-11	-1.24801e-10	-2.69571e-10
		0.01606	-6.42726e-11	-1.24801e-10	-2.68947e-10
		0.01608	-6.36486e-11	-1.25425e-10	-2.68947e-10
		0.0161	-6.42726e-11	-1.24177e-10	-2.68947e-10
		0.01612	-6.55206e-11	-1.21681e-10	-2.68947e-10
		0.01614	-6.73926e-11	-1.19809e-10	-2.68323e-10
		0.01616	-6.98887e-11	-1.19185e-10	-2.68947e-10
		0.01618	-6.98887e-11	-1.17313e-10	-2.69571e-10
		0.0162	-6.61446e-11	-1.17313e-10	-2.68323e-10
		0.01622	-6.42726e-11	-1.17313e-10	-2.68947e-10
		0.01624	-6.17766e-11	-1.18561e-10	-2.67075e-10
		0.01626	-6.05286e-11	-1.19185e-10	-2.67699e-10
		0.01628	-5.92806e-11	-1.21681e-10	-2.6645e-10
		0.0163	-5.92806e-11	-1.19809e-10	-2.67075e-10
		0.01632	-6.11526e-11	-1.18561e-10	-2.67075e-10
		0.01634	-6.30246e-11	-1.17937e-10	-2.67075e-10
		0.01636	-6.24006e-11	-1.16065e-10	-2.67699e-10
		0.01638	-6.11526e-11	-1.17313e-10	-2.68947e-10
		0.0164	-6.05286e-11	-1.17313e-10	-2.70195e-10
		0.01642	-6.05286e-11	-1.19809e-10	-2.69571e-10
		0.01644	-5.99046e-11	-1.21681e-10	-2.70819e-10
		0.01646	-6.17766e-11	-1.22929e-10	-2.70195e-10
		0.01648	-6.48966e-11	-1.23553e-10	-2.70195e-10
		0.0165	-6.55206e-11	-1.23553e-10	-2.69571e-10
		0.01652	-6.73926e-11	-1.24177e-10	-2.70195e-10
		0.01654	-6.80166e-11	-1.22305e-10	-2.71443e-10
		0.01656	-6.80166e-11	-1.22305e-10	-2.71443e-10
		0.01658	-6.80166e-11	-1.20433e-10	-2.73939e-10
		0.0166	-6.55206e-11	-1.18561e-10	-2.73939e-10
		0.01662	-6.24006e-11	-1.19809e-10	-2.73939e-10
		0.01664	-6.42726e-11	-1.18561e-10	-2.73315e-10
		0.01666	-6.30246e-11	-1.19809e-10	-2.72067e-10
		0.01668	-6.36486e-11	-1.18561e-10	-2.70195e-10
		0.0167	-6.24006e-11	-1.18561e-10	-2.68323e-10
		0.01672	-6.24006e-11	-1.19809e-10	-2.68947e-10
		0.01674	-6.11526e-11	-1.20433e-10	-2.67699e-10
		0.01676	-6.24006e-11	-1.21057e-10	-2.67075e-10
		0.01678	-6.42726e-11	-1.24177e-10	-2.68323e-10
		0.0168	-6.48966e-11	-1.23553e-10	-2.67699e-10
		0.01682	-6.55206e-11	-1.25425e-10	-2.67699e-10
		0.01684	-6.61446e-11	-1.24177e-10	-2.67075e-10
		0.01686	-6.67686e-11	-1.24801e-10	-2.68323e-10
		0.01688	-6.61446e-11	-1.24177e-10	-2.68323e-10
		0.0169	-6.42726e-11	-1.22305e-10	-2.68947e-10
		0.01692	-6.17766e-11	-1.21681e-10	-2.69571e-10
		0.01694	-6.11526e-11	-1.19809e-10	-2.70195e-10
		0.01696	-6.36486e-11	-1.19185e-10	-2.69571e-10
		0.01698	-6.36486e-11	-1.19185e-10	-2.68947e-10
		0.017	-6.48966e-11	-1.17313e-10	-2.68323e-10
		0.01702	-6.42726e-11	-1.16689e-10	-2.67699e-10
		0.01704	-6.48966e-11	-1.17937e-10	-2.68947e-10
		0.01706	-6.42726e-11	-1.19185e-10	-2.68947e-10
		0.01708	-6.11526e-11	-1.21057e-10	-2.69571e-10
		0.0171	-6.30246e-11	-1.21057e-10	-2.69571e-10
		0.01712	-6.24006e-11	-1.21681e-10	-2.70195e-10
		0.01714	-6.42726e-11	-1.22929e-10	-2.69571e-10
		0.01716	-6.36486e-11	-1.22929e-10	-2.70195e-10
		0.01718	-6.48966e-11	-1.22305e-10	-2.70195e-10
		0.0172	-6.67686e-11	-1.21681e-10	-2.68323e-10
		0.01722	-6.73926e-11	-1.21057e-10	-2.70195e-10
		0.01724	-6.61446e-11	-1.20433e-10	-2.70195e-10
		0.01726	-6.36486e-11	-1.21681e-10	-2.70195e-10
		0.01728	-6.11526e-11	-1.21681e-10	-2.72067e-10
		0.0173	-5.92806e-11	-1.21057e-10	-2.73315e-10
		0.01732	-5.86565e-11	-1.20433e-10	-2.71443e-10
		0.01734	-5.86565e-11	-1.21057e-10	-2.70195e-10
		0.01736	-5.86565e-11	-1.21057e-10	-2.70195e-10
		0.01738	-5.99046e-11	-1.21681e-10	-2.68947e-10
		0.0174	-6.17766e-11	-1.22929e-10	-2.67699e-10
		0.01742	-6.30246e-11	-1.21681e-10	-2.65826e-10
		0.01744	-6.36486e-11	-1.21057e-10	-2.6645e-10
		0.01746	-6.42726e-11	-1.21057e-10	-2.65826e-10
		0.01748	-6.48966e-11	-1.20433e-10	-2.65826e-10
		0.0175	-6.36486e-11	-1.21681e-10	-2.63954e-10
		0.01752	-6.24006e-11	-1.21057e-10	-2.6645e-10
		0.01754	-6.36486e-11	-1.21057e-10	-2.67075e-10
		0.01756	-6.36486e-11	-1.22305e-10	-2.68947e-10
		0.01758	-6.42726e-11	-1.21057e-10	-2.70195e-10
		0.0176	-6.42726e-11	-1.21681e-10	-2.73315e-10
		0.01762	-6.48966e-11	-1.21057e-10	-2.71443e-10
		0.01764	-6.67686e-11	-1.20433e-10	-2.72067e-10
		0.01766	-6.67686e-11	-1.20433e-10	-2.70195e-10
		0.01768	-6.73926e-11	-1.18561e-10	-2.70195e-10
		0.0177	-6.92646e-11	-1.19809e-10	-2.68947e-10
		0.01772	-6.86406e-11	-1.19185e-10	-2.69571e-10
		0.01774	-6.67686e-11	-1.21057e-10	-2.69571e-10
		0.01776	-6.61446e-11	-1.22929e-10	-2.69571e-10
		0.01778	-6.48966e-11	-1.22305e-10	-2.69571e-10
		0.0178	-6.30246e-11	-1.23553e-10	-2.68323e-10
		0.01782	-6.30246e-11	-1.22929e-10	-2.67699e-10
		0.01784	-6.36486e-11	-1.22929e-10	-2.6645e-10
		0.01786	-6.55206e-11	-1.22305e-10	-2.67075e-10
		0.01788	-6.42726e-11	-1.24177e-10	-2.67699e-10
		0.0179	-6.36486e-11	-1.24177e-10	-2.67699e-10
		0.01792	-6.24006e-11	-1.24177e-10	-2.68947e-10
		0.01794	-6.05286e-11	-1.22305e-10	-2.70195e-10
		0.01796	-6.11526e-11	-1.22305e-10	-2.70819e-10
		0.01798	-6.42726e-11	-1.20433e-10	-2.71443e-10
		0.018	-6.48966e-11	-1.19185e-10	-2.70819e-10
		0.01802	-6.67686e-11	-1.18561e-10	-2.70195e-10
		0.01804	-6.86406e-11	-1.17313e-10	-2.70819e-10
		0.01806	-6.67686e-11	-1.17937e-10	-2.70195e-10
		0.01808	-6.61446e-11	-1.17937e-10	-2.68947e-10
		0.0181	-6.30246e-11	-1.19185e-10	-2.68947e-10
		0.01812	-5.99046e-11	-1.17313e-10	-2.68323e-10
		0.01814	-5.86565e-11	-1.17937e-10	-2.68947e-10
		0.01816	-6.05286e-11	-1.19185e-10	-2.68947e-10
		0.01818	-6.36486e-11	-1.20433e-10	-2.69571e-10
		0.0182	-6.55206e-11	-1.20433e-10	-2.72691e-10
		0.01822	-6.55206e-11	-1.21057e-10	-2.73315e-10
		0.01824	-6.61446e-11	-1.20433e-10	-2.73939e-10
		0.01826	-6.48966e-11	-1.21681e-10	-2.73315e-10
		0.01828	-6.36486e-11	-1.22305e-10	-2.72067e-10
		0.0183	-6.36486e-11	-1.23553e-10	-2.70819e-10
		0.01832	-6.42726e-11	-1.22305e-10	-2.67699e-10
		0.01834	-6.42726e-11	-1.22929e-10	-2.65826e-10
		0.01836	-6.36486e-11	-1.23553e-10	-2.65826e-10
		0.01838	-6.24006e-11	-1.21057e-10	-2.67075e-10
		0.0184	-6.11526e-11	-1.21057e-10	-2.6645e-10
		0.01842	-5.92806e-11	-1.21057e-10	-2.68947e-10
		0.01844	-5.74085e-11	-1.19809e-10	-2.69571e-10
		0.01846	-5.92806e-11	-1.19185e-10	-2.70195e-10
		0.01848	-5.99046e-11	-1.19185e-10	-2.69571e-10
		0.0185	-6.36486e-11	-1.19185e-10	-2.68947e-10
		0.01852	-6.55206e-11	-1.20433e-10	-2.67075e-10
		0.01854	-6.73926e-11	-1.19809e-10	-2.67075e-10
		0.01856	-6.61446e-11	-1.21681e-10	-2.68947e-10
		0.01858	-6.61446e-11	-1.21681e-10	-2.70195e-10
		0.0186	-6.42726e-11	-1.23553e-10	-2.67699e-10
		0.01862	-6.30246e-11	-1.24177e-10	-2.68323e-10
		0.01864	-6.36486e-11	-1.21681e-10	-2.68323e-10
		0.01866	-6.42726e-11	-1.21681e-10	-2.68323e-10
		0.01868	-6.48966e-11	-1.19809e-10	-2.6645e-10
		0.0187	-6.42726e-11	-1.19809e-10	-2.65826e-10
		0.01872	-6.48966e-11	-1.20433e-10	-2.64578e-10
		0.01874	-6.42726e-11	-1.21057e-10	-2.6645e-10
		0.01876	-6.24006e-11	-1.20433e-10	-2.6645e-10
		0.01878	-6.36486e-11	-1.21057e-10	-2.67075e-10
		0.0188	-6.36486e-11	-1.21057e-10	-2.6645e-10
		0.01882	-6.24006e-11	-1.21681e-10	-2.6645e-10
		0.01884	-6.36486e-11	-1.19185e-10	-2.64578e-10
		0.01886	-6.30246e-11	-1.19809e-10	-2.64578e-10
		0.01888	-6.36486e-11	-1.19185e-10	-2.62706e-10
		0.0189	-6.17766e-11	-1.17313e-10	-2.62706e-10
		0.01892	-6.17766e-11	-1.17937e-10	-2.62706e-10
		0.01894	-5.99046e-11	-1.19185e-10	-2.6333e-10
		0.01896	-5.74085e-11	-1.19809e-10	-2.63954e-10
		0.01898	-5.80325e-11	-1.21057e-10	-2.63954e-10
		0.019	-5.67845e-11	-1.21057e-10	-2.63954e-10
		0.01902	-5.86565e-11	-1.22929e-10	-2.62082e-10
		0.01904	-5.80325e-11	-1.22305e-10	-2.62706e-10
		0.01906	-6.11526e-11	-1.21681e-10	-2.62706e-10
		0.01908	-6.17766e-11	-1.20433e-10	-2.65202e-10
		0.0191	-6.36486e-11	-1.19185e-10	-2.6645e-10
		0.01912	-6.42726e-11	-1.19185e-10	-2.67699e-10
		0.01914	-6.73926e-11	-1.17937e-10	-2.67075e-10
		0.01916	-6.61446e-11	-1.16689e-10	-2.67699e-10
		0.01918	-6.73926e-11	-1.15441e-10	-2.6645e-10
		0.0192	-6.73926e-11	-1.15441e-10	-2.67075e-10
		0.01922	-6.73926e-11	-1.16065e-10	-2.65826e-10
		0.01924	-6.55206e-11	-1.17937e-10	-2.6645e-10
		0.01926	-6.42726e-11	-1.18561e-10	-2.6645e-10
		0.01928	-6.48966e-11	-1.21057e-10	-2.67075e-10
		0.0193	-6.48966e-11	-1.20433e-10	-2.6645e-10
		0.01932	-6.55206e-11	-1.21681e-10	-2.65826e-10
		0.01934	-6.67686e-11	-1.22305e-10	-2.64578e-10
		0.01936	-6.73926e-11	-1.23553e-10	-2.6333e-10
		0.01938	-6.67686e-11	-1.22929e-10	-2.6333e-10
		0.0194	-6.73926e-11	-1.20433e-10	-2.62706e-10
		0.01942	-6.55206e-11	-1.21681e-10	-2.6333e-10
		0.01944	-6.55206e-11	-1.22305e-10	-2.62706e-10
		0.01946	-6.48966e-11	-1.21057e-10	-2.63954e-10
		0.01948	-6.61446e-11	-1.22929e-10	-2.6333e-10
		0.0195	-6.80166e-11	-1.22305e-10	-2.63954e-10
		0.01952	-7.05127e-11	-1.23553e-10	-2.6333e-10
		0.01954	-7.11367e-11	-1.22929e-10	-2.65202e-10
		0.01956	-6.92646e-11	-1.21681e-10	-2.63954e-10
		0.01958	-6.86406e-11	-1.22929e-10	-2.6645e-10
		0.0196	-6.73926e-11	-1.23553e-10	-2.67699e-10
		0.01962	-6.61446e-11	-1.24177e-10	-2.69571e-10
		0.01964	-6.73926e-11	-1.21681e-10	-2.70195e-10
		0.01966	-6.55206e-11	-1.20433e-10	-2.70195e-10
		0.01968	-6.73926e-11	-1.20433e-10	-2.68947e-10
		0.0197	-6.73926e-11	-1.18561e-10	-2.70819e-10
		0.01972	-6.55206e-11	-1.17313e-10	-2.69571e-10
		0.01974	-6.48966e-11	-1.18561e-10	-2.68947e-10
		0.01976	-6.24006e-11	-1.17937e-10	-2.68323e-10
		0.01978	-6.11526e-11	-1.18561e-10	-2.68947e-10
		0.0198	-6.05286e-11	-1.19809e-10	-2.68947e-10
		0.01982	-6.11526e-11	-1.21057e-10	-2.68323e-10
		0.01984	-6.17766e-11	-1.21681e-10	-2.68323e-10
		0.01986	-6.17766e-11	-1.22305e-10	-2.6645e-10
		0.01988	-6.11526e-11	-1.21681e-10	-2.6645e-10
		0.0199	-6.11526e-11	-1.20433e-10	-2.67075e-10
		0.01992	-5.86565e-11	-1.21681e-10	-2.6645e-10
		0.01994	-5.80325e-11	-1.21057e-10	-2.65202e-10
		0.01996	-5.92806e-11	-1.21681e-10	-2.63954e-10
		0.01998	-6.05286e-11	-1.23553e-10	-2.6333e-10
		0.02	-6.30246e-11	-1.23553e-10	-2.61458e-10
		0.02002	-6.48966e-11	-1.24177e-10	-2.61458e-10
		0.02004	-6.67686e-11	-1.22305e-10	-2.61458e-10
		0.02006	-6.55206e-11	-1.21681e-10	-2.62082e-10
		0.02008	-6.55206e-11	-1.21681e-10	-2.6333e-10
		0.0201	-6.24006e-11	-1.22929e-10	-2.65826e-10
		0.02012	-6.17766e-11	-1.21057e-10	-2.67075e-10
		0.02014	-6.17766e-11	-1.21681e-10	-2.67699e-10
		0.02016	-6.17766e-11	-1.19185e-10	-2.67075e-10
		0.02018	-6.36486e-11	-1.20433e-10	-2.67075e-10
		0.0202	-6.61446e-11	-1.20433e-10	-2.63954e-10
		0.02022	-6.55206e-11	-1.20433e-10	-2.6333e-10
		0.02024	-6.61446e-11	-1.21681e-10	-2.6333e-10
		0.02026	-6.30246e-11	-1.21057e-10	-2.6333e-10
		0.02028	-6.24006e-11	-1.22929e-10	-2.62082e-10
		0.0203	-6.24006e-11	-1.24801e-10	-2.62082e-10
		0.02032	-6.42726e-11	-1.24177e-10	-2.63954e-10
		0.02034	-6.42726e-11	-1.23553e-10	-2.64578e-10
		0.02036	-6.67686e-11	-1.21681e-10	-2.65826e-10
		0.02038	-6.80166e-11	-1.22305e-10	-2.6645e-10
		0.0204	-6.86406e-11	-1.22305e-10	-2.68323e-10
		0.02042	-6.73926e-11	-1.26049e-10	-2.69571e-10
		0.02044	-6.61446e-11	-1.26673e-10	-2.68947e-10
		0.02046	-6.55206e-11	-1.26673e-10	-2.70819e-10
		0.02048	-6.55206e-11	-1.23553e-10	-2.67699e-10
		0.0205	-6.61446e-11	-1.22305e-10	-2.6645e-10
		0.02052	-6.55206e-11	-1.19185e-10	-2.64578e-10
		0.02054	-6.61446e-11	-1.16689e-10	-2.6333e-10
		0.02056	-6.61446e-11	-1.17313e-10	-2.63954e-10
		0.02058	-6.42726e-11	-1.16065e-10	-2.64578e-10
		0.0206	-6.55206e-11	-1.18561e-10	-2.64578e-10
		0.02062	-6.48966e-11	-1.19809e-10	-2.6645e-10
		0.02064	-6.80166e-11	-1.19809e-10	-2.67075e-10
		0.02066	-6.73926e-11	-1.19185e-10	-2.67699e-10
		0.02068	-6.73926e-11	-1.19809e-10	-2.68947e-10
		0.0207	-6.92646e-11	-1.20433e-10	-2.70195e-10
		0.02072	-6.67686e-11	-1.19809e-10	-2.67699e-10
		0.02074	-6.30246e-11	-1.21057e-10	-2.68323e-10
		0.02076	-6.11526e-11	-1.21057e-10	-2.68947e-10
		0.02078	-6.11526e-11	-1.22305e-10	-2.68323e-10
		0.0208	-5.99046e-11	-1.20433e-10	-2.67699e-10
		0.02082	-5.99046e-11	-1.18561e-10	-2.68323e-10
		0.02084	-6.30246e-11	-1.18561e-10	-2.67699e-10
		0.02086	-6.61446e-11	-1.19185e-10	-2.68947e-10
		0.02088	-6.55206e-11	-1.19185e-10	-2.69571e-10
		0.0209	-6.55206e-11	-1.20433e-10	-2.70195e-10
		0.02092	-6.61446e-11	-1.20433e-10	-2.72691e-10
		0.02094	-6.67686e-11	-1.21057e-10	-2.72067e-10
		0.02096	-6.55206e-11	-1.21681e-10	-2.70195e-10
		0.02098	-6.55206e-11	-1.20433e-10	-2.71443e-10
		0.021	-6.61446e-11	-1.21057e-10	-2.70195e-10
		0.02102	-6.55206e-11	-1.21057e-10	-2.70195e-10
		0.02104	-6.48966e-11	-1.22305e-10	-2.68947e-10
		0.02106	-6.42726e-11	-1.21057e-10	-2.68323e-10
		0.02108	-6.17766e-11	-1.21057e-10	-2.67075e-10
		0.0211	-6.11526e-11	-1.20433e-10	-2.65202e-10
		0.02112	-6.05286e-11	-1.19809e-10	-2.64578e-10
		0.02114	-6.11526e-11	-1.21057e-10	-2.6333e-10
		0.02116	-6.17766e-11	-1.19809e-10	-2.63954e-10
		0.02118	-6.42726e-11	-1.19185e-10	-2.62706e-10
		0.0212	-6.67686e-11	-1.18561e-10	-2.65202e-10
		0.02122	-6.67686e-11	-1.18561e-10	-2.64578e-10
		0.02124	-6.67686e-11	-1.18561e-10	-2.6645e-10
		0.02126	-6.55206e-11	-1.18561e-10	-2.68323e-10
		0.02128	-6.55206e-11	-1.19185e-10	-2.68947e-10
		0.0213	-6.42726e-11	-1.19185e-10	-2.68947e-10
		0.02132	-6.67686e-11	-1.19185e-10	-2.67699e-10
		0.02134	-6.67686e-11	-1.17313e-10	-2.67699e-10
		0.02136	-6.73926e-11	-1.18561e-10	-2.67699e-10
		0.02138	-6.80166e-11	-1.18561e-10	-2.6645e-10
		0.0214	-6.67686e-11	-1.19185e-10	-2.65826e-10
		0.02142	-6.61446e-11	-1.19185e-10	-2.65202e-10
		0.02144	-6.36486e-11	-1.20433e-10	-2.6645e-10
		0.02146	-6.36486e-11	-1.22305e-10	-2.6645e-10
		0.02148	-6.30246e-11	-1.23553e-10	-2.67699e-10
		0.0215	-6.30246e-11	-1.23553e-10	-2.67699e-10
		0.02152	-6.42726e-11	-1.22305e-10	-2.67075e-10
		0.02154	-6.36486e-11	-1.23553e-10	-2.68323e-10
		0.02156	-6.11526e-11	-1.22305e-10	-2.67075e-10
		0.02158	-5.99046e-11	-1.23553e-10	-2.68323e-10
		0.0216	-5.99046e-11	-1.22305e-10	-2.67699e-10
		0.02162	-6.05286e-11	-1.22929e-10	-2.6645e-10
		0.02164	-6.11526e-11	-1.22929e-10	-2.65202e-10
		0.02166	-6.42726e-11	-1.21057e-10	-2.6645e-10
		0.02168	-6.48966e-11	-1.19809e-10	-2.6333e-10
		0.0217	-6.61446e-11	-1.17313e-10	-2.62082e-10
		0.02172	-6.73926e-11	-1.18561e-10	-2.62082e-10
		0.02174	-6.80166e-11	-1.18561e-10	-2.63954e-10
		0.02176	-6.67686e-11	-1.20433e-10	-2.64578e-10
		0.02178	-6.80166e-11	-1.21057e-10	-2.65826e-10
		0.0218	-6.73926e-11	-1.22305e-10	-2.6645e-10
		0.02182	-6.73926e-11	-1.23553e-10	-2.67075e-10
		0.02184	-6.67686e-11	-1.23553e-10	-2.65826e-10
		0.02186	-6.67686e-11	-1.25425e-10	-2.67075e-10
		0.02188	-6.55206e-11	-1.24801e-10	-2.67075e-10
		0.0219	-6.30246e-11	-1.26049e-10	-2.67699e-10
		0.02192	-6.11526e-11	-1.24801e-10	-2.68947e-10
		0.02194	-5.92806e-11	-1.24177e-10	-2.70195e-10
		0.02196	-6.05286e-11	-1.23553e-10	-2.70195e-10
		0.02198	-5.86565e-11	-1.22929e-10	-2.68947e-10
		0.022	-5.99046e-11	-1.22929e-10	-2.67075e-10
		0.02202	-5.92806e-11	-1.23553e-10	-2.65202e-10
		0.02204	-6.17766e-11	-1.21681e-10	-2.65202e-10
		0.02206	-6.05286e-11	-1.21057e-10	-2.6645e-10
		0.02208	-5.99046e-11	-1.19809e-10	-2.67699e-10
		0.0221	-5.92806e-11	-1.18561e-10	-2.69571e-10
		0.02212	-6.11526e-11	-1.17313e-10	-2.68323e-10
		0.02214	-6.05286e-11	-1.16689e-10	-2.67699e-10
		0.02216	-6.24006e-11	-1.15441e-10	-2.67699e-10
		0.02218	-6.48966e-11	-1.15441e-10	-2.67075e-10
		0.0222	-6.42726e-11	-1.16689e-10	-2.6645e-10
		0.02222	-6.48966e-11	-1.18561e-10	-2.65826e-10
		0.02224	-6.55206e-11	-1.19809e-10	-2.67075e-10
		0.02226	-6.55206e-11	-1.21681e-10	-2.65826e-10
		0.02228	-6.61446e-11	-1.21681e-10	-2.67699e-10
		0.0223	-6.80166e-11	-1.24177e-10	-2.67075e-10
		0.02232	-6.92646e-11	-1.22305e-10	-2.6645e-10
		0.02234	-7.05127e-11	-1.20433e-10	-2.6645e-10
		0.02236	-6.98887e-11	-1.18561e-10	-2.6645e-10
		0.02238	-7.05127e-11	-1.16689e-10	-2.67075e-10
		0.0224	-6.98887e-11	-1.16689e-10	-2.6645e-10
		0.02242	-7.11367e-11	-1.18561e-10	-2.65826e-10
		0.02244	-6.98887e-11	-1.19809e-10	-2.65202e-10
		0.02246	-6.73926e-11	-1.21681e-10	-2.65826e-10
		0.02248	-6.55206e-11	-1.22929e-10	-2.6645e-10
		0.0225	-6.48966e-11	-1.24801e-10	-2.67699e-10
		0.02252	-6.42726e-11	-1.24801e-10	-2.67699e-10
		0.02254	-6.30246e-11	-1.24801e-10	-2.67075e-10
		0.02256	-6.17766e-11	-1.22305e-10	-2.67699e-10
		0.02258	-6.36486e-11	-1.22305e-10	-2.68323e-10
		0.0226	-6.36486e-11	-1.21057e-10	-2.68323e-10
		0.02262	-6.11526e-11	-1.20433e-10	-2.70819e-10
		0.02264	-6.36486e-11	-1.19809e-10	-2.69571e-10
		0.02266	-6.17766e-11	-1.19185e-10	-2.70195e-10
		0.02268	-6.24006e-11	-1.20433e-10	-2.68947e-10
		0.0227	-6.24006e-11	-1.19809e-10	-2.70819e-10
		0.02272	-6.48966e-11	-1.19809e-10	-2.70819e-10
		0.02274	-6.61446e-11	-1.20433e-10	-2.70819e-10
		0.02276	-6.55206e-11	-1.21681e-10	-2.70819e-10
		0.02278	-6.36486e-11	-1.21681e-10	-2.72067e-10
		0.0228	-6.42726e-11	-1.21057e-10	-2.71443e-10
		0.02282	-6.42726e-11	-1.19809e-10	-2.70819e-10
		0.02284	-6.55206e-11	-1.18561e-10	-2.70819e-10
		0.02286	-6.67686e-11	-1.18561e-10	-2.69571e-10
		0.02288	-6.67686e-11	-1.19185e-10	-2.67699e-10
		0.0229	-6.80166e-11	-1.19185e-10	-2.6645e-10
		0.02292	-6.73926e-11	-1.18561e-10	-2.67075e-10
		0.02294	-6.55206e-11	-1.20433e-10	-2.65826e-10
		0.02296	-6.24006e-11	-1.20433e-10	-2.64578e-10
		0.02298	-6.05286e-11	-1.20433e-10	-2.6645e-10
		0.023	-6.11526e-11	-1.19185e-10	-2.65826e-10
		0.02302	-5.92806e-11	-1.17937e-10	-2.65826e-10
		0.02304	-5.99046e-11	-1.19185e-10	-2.63954e-10
		0.02306	-5.99046e-11	-1.19185e-10	-2.64578e-10
		0.02308	-5.99046e-11	-1.17937e-10	-2.65202e-10
		0.0231	-6.17766e-11	-1.15441e-10	-2.67075e-10
		0.02312	-5.99046e-11	-1.16689e-10	-2.6645e-10
		0.02314	-6.24006e-11	-1.16689e-10	-2.67699e-10
		0.02316	-6.36486e-11	-1.16065e-10	-2.68947e-10
		0.02318	-6.48966e-11	-1.15441e-10	-2.67699e-10
		0.0232	-6.73926e-11	-1.16689e-10	-2.6645e-10
		0.02322	-6.80166e-11	-1.19185e-10	-2.6645e-10
		0.02324	-6.80166e-11	-1.20433e-10	-2.65202e-10
		0.02326	-6.80166e-11	-1.20433e-10	-2.65202e-10
		0.02328	-6.98887e-11	-1.21681e-10	-2.6645e-10
		0.0233	-6.92646e-11	-1.21681e-10	-2.67699e-10
		0.02332	-6.67686e-11	-1.21057e-10	-2.67699e-10
		0.02334	-6.55206e-11	-1.22929e-10	-2.68323e-10
		0.02336	-6.30246e-11	-1.19185e-10	-2.67699e-10
		0.02338	-6.24006e-11	-1.17313e-10	-2.67075e-10
		0.0234	-6.17766e-11	-1.16065e-10	-2.68947e-10
		0.02342	-6.05286e-11	-1.16065e-10	-2.68323e-10
		0.02344	-6.30246e-11	-1.15441e-10	-2.69571e-10
		0.02346	-6.24006e-11	-1.16065e-10	-2.70195e-10
		0.02348	-6.36486e-11	-1.17937e-10	-2.69571e-10
		0.0235	-6.42726e-11	-1.17937e-10	-2.67699e-10
		0.02352	-6.36486e-11	-1.17937e-10	-2.67699e-10
		0.02354	-6.36486e-11	-1.17937e-10	-2.6645e-10
		0.02356	-6.24006e-11	-1.17937e-10	-2.65826e-10
		0.02358	-6.17766e-11	-1.18561e-10	-2.65202e-10
		0.0236	-6.11526e-11	-1.19809e-10	-2.65202e-10
		0.02362	-6.17766e-11	-1.22305e-10	-2.65202e-10
		0.02364	-6.11526e-11	-1.25425e-10	-2.65826e-10
		0.02366	-6.17766e-11	-1.26673e-10	-2.6645e-10
		0.02368	-6.36486e-11	-1.24177e-10	-2.64578e-10
		0.0237	-6.24006e-11	-1.24801e-10	-2.6645e-10
		0.02372	-6.48966e-11	-1.24801e-10	-2.67075e-10
		0.02374	-6.48966e-11	-1.23553e-10	-2.68947e-10
		0.02376	-6.42726e-11	-1.23553e-10	-2.69571e-10
		0.02378	-6.55206e-11	-1.21057e-10	-2.69571e-10
		0.0238	-6.61446e-11	-1.20433e-10	-2.69571e-10
		0.02382	-6.73926e-11	-1.21057e-10	-2.67075e-10
		0.02384	-6.61446e-11	-1.21057e-10	-2.65826e-10
		0.02386	-6.55206e-11	-1.19185e-10	-2.63954e-10
		0.02388	-6.55206e-11	-1.19185e-10	-2.63954e-10
		0.0239	-6.36486e-11	-1.18561e-10	-2.64578e-10
		0.02392	-6.42726e-11	-1.19809e-10	-2.6645e-10
		0.02394	-6.36486e-11	-1.22305e-10	-2.6645e-10
		0.02396	-6.30246e-11	-1.21681e-10	-2.67699e-10
		0.02398	-6.30246e-11	-1.22305e-10	-2.68947e-10
		0.024	-6.17766e-11	-1.21681e-10	-2.68947e-10
		0.02402	-6.24006e-11	-1.21681e-10	-2.68947e-10
		0.02404	-6.17766e-11	-1.20433e-10	-2.67699e-10
		0.02406	-6.24006e-11	-1.19185e-10	-2.6645e-10
		0.02408	-6.24006e-11	-1.19185e-10	-2.65826e-10
		0.0241	-6.30246e-11	-1.19185e-10	-2.65202e-10
		0.02412	-6.17766e-11	-1.18561e-10	-2.63954e-10
		0.02414	-6.11526e-11	-1.18561e-10	-2.65202e-10
		0.02416	-6.24006e-11	-1.19185e-10	-2.63954e-10
		0.02418	-6.11526e-11	-1.18561e-10	-2.62706e-10
		0.0242	-6.05286e-11	-1.17937e-10	-2.64578e-10
		0.02422	-6.05286e-11	-1.17313e-10	-2.64578e-10
		0.02424	-6.17766e-11	-1.17937e-10	-2.67075e-10
		0.02426	-6.30246e-11	-1.17937e-10	-2.68323e-10
		0.02428	-6.48966e-11	-1.17937e-10	-2.68947e-10
		0.0243	-6.67686e-11	-1.17937e-10	-2.68323e-10
		0.02432	-6.73926e-11	-1.20433e-10	-2.67699e-10
		0.02434	-6.80166e-11	-1.22305e-10	-2.67075e-10
		0.02436	-6.80166e-11	-1.21681e-10	-2.65202e-10
		0.02438	-6.67686e-11	-1.22305e-10	-2.65202e-10
		0.0244	-6.48966e-11	-1.22305e-10	-2.65202e-10
		0.02442	-6.42726e-11	-1.23553e-10	-2.6645e-10
		0.02444	-6.11526e-11	-1.24801e-10	-2.67075e-10
		0.02446	-5.80325e-11	-1.24177e-10	-2.67075e-10
		0.02448	-5.86565e-11	-1.22305e-10	-2.67075e-10
		0.0245	-5.92806e-11	-1.20433e-10	-2.70195e-10
		0.02452	-6.11526e-11	-1.17313e-10	-2.70195e-10
		0.02454	-6.17766e-11	-1.16689e-10	-2.72691e-10
		0.02456	-6.36486e-11	-1.16065e-10	-2.73315e-10
		0.02458	-6.24006e-11	-1.15441e-10	-2.71443e-10
		0.0246	-6.24006e-11	-1.16065e-10	-2.70819e-10
		0.02462	-6.24006e-11	-1.16065e-10	-2.68947e-10
		0.02464	-6.17766e-11	-1.16689e-10	-2.65826e-10
		0.02466	-6.36486e-11	-1.17313e-10	-2.65202e-10
		0.02468	-6.55206e-11	-1.18561e-10	-2.65826e-10
		0.0247	-6.42726e-11	-1.19809e-10	-2.65826e-10
		0.02472	-6.61446e-11	-1.19809e-10	-2.68323e-10
		0.02474	-6.80166e-11	-1.20433e-10	-2.69571e-10
		0.02476	-6.80166e-11	-1.21057e-10	-2.71443e-10
		0.02478	-6.92646e-11	-1.22305e-10	-2.70819e-10
		0.0248	-6.86406e-11	-1.22929e-10	-2.70195e-10
		0.02482	-6.80166e-11	-1.21057e-10	-2.70195e-10
		0.02484	-6.67686e-11	-1.22305e-10	-2.68947e-10
		0.02486	-6.42726e-11	-1.21057e-10	-2.69571e-10
		0.02488	-6.24006e-11	-1.21681e-10	-2.68947e-10
		0.0249	-6.11526e-11	-1.21681e-10	-2.68947e-10
		0.02492	-5.99046e-11	-1.21057e-10	-2.68323e-10
		0.02494	-6.17766e-11	-1.21057e-10	-2.65826e-10
		0.02496	-6.17766e-11	-1.20433e-10	-2.65826e-10
		0.02498	-6.30246e-11	-1.21681e-10	-2.63954e-10
		0.025	-6.55206e-11	-1.22929e-10	-2.64578e-10
		0.02502	-6.48966e-11	-1.23553e-10	-2.64578e-10
		0.02504	-6.55206e-11	-1.20433e-10	-2.64578e-10
		0.02506	-6.42726e-11	-1.21057e-10	-2.67699e-10
		0.02508	-6.11526e-11	-1.19185e-10	-2.6645e-10
		0.0251	-5.92806e-11	-1.18561e-10	-2.69571e-10
		0.02512	-5.92806e-11	-1.17937e-10	-2.69571e-10
		0.02514	-5.86565e-11	-1.17937e-10	-2.68947e-10
		0.02516	-5.99046e-11	-1.19809e-10	-2.68323e-10
		0.02518	-5.92806e-11	-1.19809e-10	-2.68323e-10
		0.0252	-6.05286e-11	-1.19809e-10	-2.67699e-10
		0.02522	-5.99046e-11	-1.20433e-10	-2.68947e-10
		0.02524	-6.05286e-11	-1.19809e-10	-2.68947e-10
		0.02526	-5.99046e-11	-1.21057e-10	-2.69571e-10
		0.02528	-6.17766e-11	-1.23553e-10	-2.68323e-10
		0.0253	-6.17766e-11	-1.20433e-10	-2.70819e-10
		0.02532	-6.17766e-11	-1.19809e-10	-2.68323e-10
		0.02534	-6.30246e-11	-1.19809e-10	-2.67075e-10
		0.02536	-6.42726e-11	-1.18561e-10	-2.6645e-10
		0.02538	-6.55206e-11	-1.17937e-10	-2.65202e-10
		0.0254	-6.48966e-11	-1.16689e-10	-2.63954e-10
		0.02542	-6.48966e-11	-1.17937e-10	-2.64578e-10
		0.02544	-6.55206e-11	-1.22929e-10	-2.65826e-10
		0.02546	-6.55206e-11	-1.24177e-10	-2.65826e-10
		0.02548	-6.48966e-11	-1.24801e-10	-2.67075e-10
		0.0255	-6.55206e-11	-1.25425e-10	-2.67699e-10
		0.02552	-6.42726e-11	-1.22305e-10	-2.68323e-10
		0.02554	-6.42726e-11	-1.18561e-10	-2.67075e-10
		0.02556	-6.42726e-11	-1.18561e-10	-2.67699e-10
		0.02558	-6.48966e-11	-1.18561e-10	-2.68947e-10
		0.0256	-6.36486e-11	-1.21057e-10	-2.67075e-10
		0.02562	-6.42726e-11	-1.21057e-10	-2.67699e-10
		0.02564	-6.48966e-11	-1.22929e-10	-2.68323e-10
		0.02566	-6.42726e-11	-1.22305e-10	-2.65826e-10
		0.02568	-6.48966e-11	-1.21681e-10	-2.6645e-10
		0.0257	-6.55206e-11	-1.20433e-10	-2.67699e-10
		0.02572	-6.42726e-11	-1.19809e-10	-2.68323e-10
		0.02574	-6.24006e-11	-1.21057e-10	-2.69571e-10
		0.02576	-6.36486e-11	-1.22305e-10	-2.69571e-10
		0.02578	-6.30246e-11	-1.22305e-10	-2.70195e-10
		0.0258	-6.11526e-11	-1.22305e-10	-2.68947e-10
		0.02582	-6.24006e-11	-1.22305e-10	-2.68323e-10
		0.02584	-6.17766e-11	-1.21681e-10	-2.67075e-10
		0.02586	-6.05286e-11	-1.20433e-10	-2.64578e-10
		0.02588	-5.99046e-11	-1.20433e-10	-2.65826e-10
		0.0259	-5.99046e-11	-1.21681e-10	-2.65826e-10
		0.02592	-6.05286e-11	-1.23553e-10	-2.64578e-10
		0.02594	-6.24006e-11	-1.22305e-10	-2.65826e-10
		0.02596	-6.24006e-11	-1.23553e-10	-2.67699e-10
		0.02598	-6.55206e-11	-1.22305e-10	-2.67075e-10
		0.026	-6.67686e-11	-1.21057e-10	-2.6645e-10
		0.02602	-6.73926e-11	-1.19809e-10	-2.68947e-10
		0.02604	-6.61446e-11	-1.18561e-10	-2.68323e-10
		0.02606	-6.55206e-11	-1.18561e-10	-2.68947e-10
		0.02608	-6.55206e-11	-1.19185e-10	-2.70195e-10
		0.0261	-6.42726e-11	-1.19809e-10	-2.70195e-10
		0.02612	-6.36486e-11	-1.17937e-10	-2.70195e-10
		0.02614	-6.11526e-11	-1.19185e-10	-2.69571e-10
		0.02616	-6.17766e-11	-1.19809e-10	-2.68947e-10
		0.02618	-6.17766e-11	-1.21681e-10	-2.68947e-10
		0.0262	-6.24006e-11	-1.21681e-10	-2.68323e-10
		0.02622	-6.05286e-11	-1.21681e-10	-2.68947e-10
		0.02624	-6.05286e-11	-1.22929e-10	-2.68947e-10
		0.02626	-5.99046e-11	-1.21681e-10	-2.69571e-10
		0.02628	-6.05286e-11	-1.21681e-10	-2.68947e-10
		0.0263	-6.17766e-11	-1.21681e-10	-2.68947e-10
		0.02632	-6.30246e-11	-1.21681e-10	-2.70195e-10
		0.02634	-6.30246e-11	-1.21681e-10	-2.68947e-10
		0.02636	-6.42726e-11	-1.21057e-10	-2.69571e-10
		0.02638	-6.36486e-11	-1.22305e-10	-2.68947e-10
		0.0264	-6.11526e-11	-1.24801e-10	-2.71443e-10
		0.02642	-6.17766e-11	-1.26673e-10	-2.71443e-10
		0.02644	-6.24006e-11	-1.25425e-10	-2.70195e-10
		0.02646	-6.24006e-11	-1.24801e-10	-2.68947e-10
		0.02648	-6.36486e-11	-1.25425e-10	-2.6645e-10
		0.0265	-6.30246e-11	-1.23553e-10	-2.63954e-10
		0.02652	-6.48966e-11	-1.22305e-10	-2.6333e-10
		0.02654	-6.61446e-11	-1.22305e-10	-2.61458e-10
		0.02656	-6.61446e-11	-1.22305e-10	-2.64578e-10
		0.02658	-6.61446e-11	-1.22305e-10	-2.64578e-10
		0.0266	-6.48966e-11	-1.22305e-10	-2.67699e-10
		0.02662	-6.55206e-11	-1.22305e-10	-2.69571e-10
		0.02664	-6.55206e-11	-1.23553e-10	-2.69571e-10
		0.02666	-6.48966e-11	-1.22305e-10	-2.69571e-10
		0.02668	-6.55206e-11	-1.21681e-10	-2.69571e-10
		0.0267	-6.55206e-11	-1.19809e-10	-2.68947e-10
		0.02672	-6.42726e-11	-1.20433e-10	-2.68947e-10
		0.02674	-6.42726e-11	-1.19809e-10	-2.67699e-10
		0.02676	-6.36486e-11	-1.21681e-10	-2.67075e-10
		0.02678	-6.36486e-11	-1.22305e-10	-2.65826e-10
		0.0268	-6.30246e-11	-1.21681e-10	-2.63954e-10
		0.02682	-6.05286e-11	-1.22305e-10	-2.62082e-10
		0.02684	-6.05286e-11	-1.21681e-10	-2.6333e-10
		0.02686	-5.99046e-11	-1.21057e-10	-2.6333e-10
		0.02688	-6.05286e-11	-1.21057e-10	-2.63954e-10
		0.0269	-5.92806e-11	-1.21681e-10	-2.6333e-10
		0.02692	-6.05286e-11	-1.21057e-10	-2.63954e-10
		0.02694	-6.17766e-11	-1.20433e-10	-2.63954e-10
		0.02696	-6.17766e-11	-1.21057e-10	-2.64578e-10
		0.02698	-6.36486e-11	-1.20433e-10	-2.65826e-10
		0.027	-6.42726e-11	-1.20433e-10	-2.64578e-10
		0.02702	-6.55206e-11	-1.18561e-10	-2.65202e-10
		0.02704	-6.61446e-11	-1.17937e-10	-2.6645e-10
		0.02706	-6.55206e-11	-1.16065e-10	-2.6645e-10
		0.02708	-6.24006e-11	-1.16065e-10	-2.67699e-10
		0.0271	-6.42726e-11	-1.16065e-10	-2.67699e-10
		0.02712	-6.30246e-11	-1.16065e-10	-2.68323e-10
		0.02714	-6.42726e-11	-1.14817e-10	-2.68323e-10
		0.02716	-6.67686e-11	-1.14817e-10	-2.67075e-10
		0.02718	-6.73926e-11	-1.17937e-10	-2.6645e-10
		0.0272	-6.73926e-11	-1.18561e-10	-2.6645e-10
		0.02722	-6.61446e-11	-1.21057e-10	-2.65202e-10
		0.02724	-6.42726e-11	-1.22305e-10	-2.65202e-10
		0.02726	-6.42726e-11	-1.25425e-10	-2.65202e-10
		0.02728	-6.17766e-11	-1.24177e-10	-2.6645e-10
		0.0273	-6.24006e-11	-1.21681e-10	-2.67699e-10
		0.02732	-6.42726e-11	-1.21057e-10	-2.68323e-10
		0.02734	-6.42726e-11	-1.19185e-10	-2.68323e-10
		0.02736	-6.42726e-11	-1.18561e-10	-2.70195e-10
		0.02738	-6.42726e-11	-1.19185e-10	-2.68947e-10
		0.0274	-6.42726e-11	-1.19809e-10	-2.69571e-10
		0.02742	-6.36486e-11	-1.18561e-10	-2.69571e-10
		0.02744	-6.36486e-11	-1.21057e-10	-2.67699e-10
		0.02746	-6.42726e-11	-1.20433e-10	-2.67699e-10
		0.02748	-6.24006e-11	-1.21057e-10	-2.67075e-10
		0.0275	-6.24006e-11	-1.19809e-10	-2.67075e-10
		0.02752	-6.30246e-11	-1.21681e-10	-2.6645e-10
		0.02754	-6.48966e-11	-1.21681e-10	-2.67075e-10
		0.02756	-6.42726e-11	-1.20433e-10	-2.67699e-10
		0.02758	-6.55206e-11	-1.22305e-10	-2.70195e-10
		0.0276	-6.67686e-11	-1.21681e-10	-2.68947e-10
		0.02762	-6.61446e-11	-1.22305e-10	-2.67699e-10
		0.02764	-6.67686e-11	-1.24177e-10	-2.67699e-10
		0.02766	-6.61446e-11	-1.23553e-10	-2.67075e-10
		0.02768	-6.67686e-11	-1.22929e-10	-2.6645e-10
		0.0277	-6.48966e-11	-1.22305e-10	-2.67075e-10
		0.02772	-6.36486e-11	-1.23553e-10	-2.65202e-10
		0.02774	-6.24006e-11	-1.24801e-10	-2.65826e-10
		0.02776	-6.17766e-11	-1.23553e-10	-2.65202e-10
		0.02778	-6.17766e-11	-1.22929e-10	-2.64578e-10
		0.0278	-5.99046e-11	-1.22929e-10	-2.63954e-10
		0.02782	-6.24006e-11	-1.20433e-10	-2.63954e-10
		0.02784	-6.17766e-11	-1.20433e-10	-2.6333e-10
		0.02786	-6.17766e-11	-1.19185e-10	-2.65202e-10
		0.02788	-5.99046e-11	-1.17937e-10	-2.65202e-10
		0.0279	-5.99046e-11	-1.16689e-10	-2.65826e-10
		0.02792	-5.92806e-11	-1.17313e-10	-2.67699e-10
		0.02794	-6.17766e-11	-1.16065e-10	-2.68947e-10
		0.02796	-6.55206e-11	-1.16065e-10	-2.67699e-10
		0.02798	-6.61446e-11	-1.16065e-10	-2.68947e-10
		0.028	-6.73926e-11	-1.17937e-10	-2.67075e-10
		0.02802	-6.61446e-11	-1.17937e-10	-2.6645e-10
		0.02804	-6.55206e-11	-1.17313e-10	-2.6645e-10
		0.02806	-6.48966e-11	-1.17937e-10	-2.65826e-10
		0.02808	-6.42726e-11	-1.16689e-10	-2.65826e-10
		0.0281	-6.48966e-11	-1.16689e-10	-2.64578e-10
		0.02812	-6.30246e-11	-1.16689e-10	-2.64578e-10
		0.02814	-6.55206e-11	-1.18561e-10	-2.6333e-10
		0.02816	-6.55206e-11	-1.19185e-10	-2.62082e-10
		0.02818	-6.48966e-11	-1.21057e-10	-2.60834e-10
		0.0282	-6.48966e-11	-1.21057e-10	-2.62706e-10
		0.02822	-6.48966e-11	-1.21681e-10	-2.65202e-10
		0.02824	-6.30246e-11	-1.22305e-10	-2.67075e-10
		0.02826	-6.17766e-11	-1.21681e-10	-2.67699e-10
		0.02828	-6.36486e-11	-1.25425e-10	-2.69571e-10
		0.0283	-6.61446e-11	-1.23553e-10	-2.70819e-10
		0.02832	-6.61446e-11	-1.24177e-10	-2.68947e-10
		0.02834	-6.67686e-11	-1.22305e-10	-2.68323e-10
		0.02836	-6.86406e-11	-1.20433e-10	-2.67699e-10
		0.02838	-6.67686e-11	-1.19809e-10	-2.67699e-10
		0.0284	-6.36486e-11	-1.19809e-10	-2.68323e-10
		0.02842	-6.11526e-11	-1.17937e-10	-2.68947e-10
		0.02844	-5.92806e-11	-1.19185e-10	-2.68947e-10
		0.02846	-5.74085e-11	-1.17937e-10	-2.69571e-10
		0.02848	-5.80325e-11	-1.16689e-10	-2.68947e-10
		0.0285	-5.92806e-11	-1.18561e-10	-2.67699e-10
		0.02852	-6.24006e-11	-1.19185e-10	-2.65202e-10
		0.02854	-6.42726e-11	-1.19185e-10	-2.6333e-10
		0.02856	-6.61446e-11	-1.19809e-10	-2.62706e-10
		0.02858	-6.48966e-11	-1.19809e-10	-2.6333e-10
		0.0286	-6.48966e-11	-1.21681e-10	-2.63954e-10
		0.02862	-6.42726e-11	-1.20433e-10	-2.65202e-10
		0.02864	-6.24006e-11	-1.19809e-10	-2.65202e-10
		0.02866	-6.36486e-11	-1.19185e-10	-2.6645e-10
		0.02868	-6.30246e-11	-1.18561e-10	-2.65202e-10
		0.0287	-6.30246e-11	-1.18561e-10	-2.6645e-10
		0.02872	-6.17766e-11	-1.17937e-10	-2.65202e-10
		0.02874	-5.99046e-11	-1.19185e-10	-2.67075e-10
		0.02876	-6.05286e-11	-1.17937e-10	-2.65826e-10
		0.02878	-6.11526e-11	-1.19185e-10	-2.65826e-10
		0.0288	-6.36486e-11	-1.18561e-10	-2.65826e-10
		0.02882	-6.42726e-11	-1.19809e-10	-2.6333e-10
		0.02884	-6.48966e-11	-1.15441e-10	-2.62082e-10
		0.02886	-6.61446e-11	-1.14817e-10	-2.61458e-10
		0.02888	-6.55206e-11	-1.13569e-10	-2.60834e-10
		0.0289	-6.48966e-11	-1.13569e-10	-2.61458e-10
		0.02892	-6.42726e-11	-1.15441e-10	-2.6021e-10
		0.02894	-6.42726e-11	-1.17313e-10	-2.61458e-10
		0.02896	-6.55206e-11	-1.19809e-10	-2.61458e-10
		0.02898	-6.73926e-11	-1.21057e-10	-2.62082e-10
		0.029	-6.73926e-11	-1.21681e-10	-2.6333e-10
		0.02902	-6.73926e-11	-1.20433e-10	-2.62082e-10
		0.02904	-6.48966e-11	-1.20433e-10	-2.61458e-10
		0.02906	-6.36486e-11	-1.19185e-10	-2.63954e-10
		0.02908	-6.05286e-11	-1.19809e-10	-2.64578e-10
		0.0291	-5.92806e-11	-1.18561e-10	-2.65826e-10
		0.02912	-6.11526e-11	-1.19809e-10	-2.6645e-10
		0.02914	-6.24006e-11	-1.19185e-10	-2.6645e-10
		0.02916	-6.30246e-11	-1.19809e-10	-2.65202e-10
		0.02918	-6.55206e-11	-1.19809e-10	-2.65202e-10
		0.0292	-6.73926e-11	-1.20433e-10	-2.65202e-10
		0.02922	-6.67686e-11	-1.19809e-10	-2.65202e-10
		0.02924	-6.48966e-11	-1.19185e-10	-2.65202e-10
		0.02926	-6.48966e-11	-1.18561e-10	-2.6645e-10
		0.02928	-6.42726e-11	-1.20433e-10	-2.67699e-10
		0.0293	-6.36486e-11	-1.21681e-10	-2.65826e-10
		0.02932	-6.30246e-11	-1.22929e-10	-2.65202e-10
		0.02934	-6.30246e-11	-1.23553e-10	-2.64578e-10
		0.02936	-6.24006e-11	-1.22929e-10	-2.65826e-10
		0.02938	-6.30246e-11	-1.23553e-10	-2.65826e-10
		0.0294	-6.24006e-11	-1.22305e-10	-2.67699e-10
		0.02942	-6.24006e-11	-1.22305e-10	-2.68947e-10
		0.02944	-6.05286e-11	-1.21057e-10	-2.67075e-10
		0.02946	-6.17766e-11	-1.21057e-10	-2.65826e-10
		0.02948	-6.24006e-11	-1.19809e-10	-2.65826e-10
		0.0295	-6.48966e-11	-1.19185e-10	-2.63954e-10
		0.02952	-6.36486e-11	-1.19809e-10	-2.6333e-10
		0.02954	-6.36486e-11	-1.20433e-10	-2.62082e-10
		0.02956	-6.17766e-11	-1.21057e-10	-2.62706e-10
		0.02958	-6.11526e-11	-1.21057e-10	-2.62082e-10
		0.0296	-5.99046e-11	-1.21681e-10	-2.6333e-10
		0.02962	-6.11526e-11	-1.21681e-10	-2.64578e-10
		0.02964	-6.36486e-11	-1.22929e-10	-2.65826e-10
		0.02966	-6.36486e-11	-1.21057e-10	-2.67075e-10
		0.02968	-6.48966e-11	-1.21681e-10	-2.67699e-10
		0.0297	-6.48966e-11	-1.21057e-10	-2.68323e-10
		0.02972	-6.42726e-11	-1.23553e-10	-2.68323e-10
		0.02974	-6.36486e-11	-1.24177e-10	-2.70195e-10
		0.02976	-6.30246e-11	-1.22929e-10	-2.68947e-10
		0.02978	-6.42726e-11	-1.22305e-10	-2.67699e-10
		0.0298	-6.42726e-11	-1.21681e-10	-2.6645e-10
		0.02982	-6.61446e-11	-1.21057e-10	-2.6645e-10
		0.02984	-6.80166e-11	-1.20433e-10	-2.65202e-10
		0.02986	-6.73926e-11	-1.18561e-10	-2.64578e-10
		0.02988	-6.55206e-11	-1.16689e-10	-2.63954e-10
		0.0299	-6.42726e-11	-1.17937e-10	-2.64578e-10
		0.02992	-6.24006e-11	-1.17937e-10	-2.6645e-10
		0.02994	-6.24006e-11	-1.16689e-10	-2.67699e-10
		0.02996	-6.55206e-11	-1.17313e-10	-2.68323e-10
		0.02998	-6.61446e-11	-1.16689e-10	-2.67699e-10
		0.03	-6.73926e-11	-1.15441e-10	-2.68947e-10
		0.03002	-6.67686e-11	-1.13569e-10	-2.67699e-10
		0.03004	-6.55206e-11	-1.12321e-10	-2.67075e-10
		0.03006	-6.24006e-11	-1.12945e-10	-2.65826e-10
		0.03008	-6.24006e-11	-1.14193e-10	-2.63954e-10
		0.0301	-6.36486e-11	-1.15441e-10	-2.62706e-10
		0.03012	-6.42726e-11	-1.18561e-10	-2.6333e-10
		0.03014	-6.61446e-11	-1.21057e-10	-2.6333e-10
		0.03016	-6.73926e-11	-1.21057e-10	-2.62082e-10
		0.03018	-6.92646e-11	-1.19185e-10	-2.6333e-10
		0.0302	-6.92646e-11	-1.17937e-10	-2.63954e-10
		0.03022	-6.98887e-11	-1.17313e-10	-2.65202e-10
		0.03024	-6.92646e-11	-1.19185e-10	-2.65826e-10
		0.03026	-6.73926e-11	-1.17937e-10	-2.64578e-10
		0.03028	-6.48966e-11	-1.20433e-10	-2.65202e-10
		0.0303	-6.36486e-11	-1.22305e-10	-2.65826e-10
		0.03032	-6.42726e-11	-1.26049e-10	-2.65202e-10
		0.03034	-6.42726e-11	-1.26049e-10	-2.65826e-10
		0.03036	-6.17766e-11	-1.25425e-10	-2.67075e-10
		0.03038	-6.17766e-11	-1.26049e-10	-2.67075e-10
		0.0304	-6.24006e-11	-1.26673e-10	-2.69571e-10
		0.03042	-6.11526e-11	-1.25425e-10	-2.68947e-10
		0.03044	-6.30246e-11	-1.22305e-10	-2.68323e-10
		0.03046	-6.48966e-11	-1.21057e-10	-2.68323e-10
		0.03048	-6.73926e-11	-1.19809e-10	-2.70195e-10
		0.0305	-6.80166e-11	-1.18561e-10	-2.70195e-10
		0.03052	-6.73926e-11	-1.16689e-10	-2.68947e-10
		0.03054	-6.67686e-11	-1.17937e-10	-2.68947e-10
		0.03056	-6.55206e-11	-1.17313e-10	-2.69571e-10
		0.03058	-6.36486e-11	-1.17937e-10	-2.69571e-10
		0.0306	-6.05286e-11	-1.19809e-10	-2.69571e-10
		0.03062	-5.99046e-11	-1.20433e-10	-2.69571e-10
		0.03064	-5.99046e-11	-1.20433e-10	-2.69571e-10
		0.03066	-5.92806e-11	-1.19185e-10	-2.70195e-10
		0.03068	-5.86565e-11	-1.19185e-10	-2.70819e-10
		0.0307	-5.80325e-11	-1.16065e-10	-2.68947e-10
		0.03072	-5.92806e-11	-1.18561e-10	-2.69571e-10
		0.03074	-5.99046e-11	-1.18561e-10	-2.68947e-10
		0.03076	-6.05286e-11	-1.19185e-10	-2.67075e-10
		0.03078	-6.17766e-11	-1.19185e-10	-2.67075e-10
		0.0308	-6.24006e-11	-1.19809e-10	-2.6645e-10
		0.03082	-6.36486e-11	-1.17937e-10	-2.64578e-10
		0.03084	-6.61446e-11	-1.19185e-10	-2.65826e-10
		0.03086	-6.73926e-11	-1.16689e-10	-2.64578e-10
		0.03088	-6.55206e-11	-1.16689e-10	-2.64578e-10
		0.0309	-6.55206e-11	-1.18561e-10	-2.63954e-10
		0.03092	-6.36486e-11	-1.19185e-10	-2.64578e-10
		0.03094	-6.36486e-11	-1.18561e-10	-2.64578e-10
		0.03096	-6.55206e-11	-1.19185e-10	-2.64578e-10
		0.03098	-6.61446e-11	-1.19185e-10	-2.64578e-10
		0.031	-6.92646e-11	-1.17313e-10	-2.64578e-10
		0.03102	-6.98887e-11	-1.15441e-10	-2.6333e-10
		0.03104	-7.23847e-11	-1.16065e-10	-2.63954e-10
		0.03106	-6.98887e-11	-1.15441e-10	-2.63954e-10
		0.03108	-6.92646e-11	-1.17313e-10	-2.6333e-10
		0.0311	-6.55206e-11	-1.18561e-10	-2.63954e-10
		0.03112	-6.17766e-11	-1.18561e-10	-2.63954e-10
		0.03114	-5.99046e-11	-1.19809e-10	-2.64578e-10
		0.03116	-5.92806e-11	-1.19809e-10	-2.63954e-10
		0.03118	-5.99046e-11	-1.21057e-10	-2.6333e-10
		0.0312	-6.11526e-11	-1.19809e-10	-2.6333e-10
		0.03122	-6.30246e-11	-1.19185e-10	-2.63954e-10
		0.03124	-6.61446e-11	-1.19185e-10	-2.63954e-10
		0.03126	-6.73926e-11	-1.20433e-10	-2.63954e-10
		0.03128	-6.80166e-11	-1.21057e-10	-2.65202e-10
		0.0313	-6.92646e-11	-1.21681e-10	-2.67699e-10
		0.03132	-7.05127e-11	-1.21681e-10	-2.67075e-10
		0.03134	-6.98887e-11	-1.20433e-10	-2.67699e-10
		0.03136	-6.92646e-11	-1.19809e-10	-2.68947e-10
		0.03138	-6.61446e-11	-1.17937e-10	-2.68947e-10
		0.0314	-6.36486e-11	-1.17313e-10	-2.68323e-10
		0.03142	-6.11526e-11	-1.17313e-10	-2.67699e-10
		0.03144	-5.92806e-11	-1.18561e-10	-2.68947e-10
		0.03146	-5.80325e-11	-1.19185e-10	-2.68947e-10
		0.03148	-5.92806e-11	-1.21057e-10	-2.68323e-10
		0.0315	-6.17766e-11	-1.21057e-10	-2.68323e-10
		0.03152	-6.30246e-11	-1.21681e-10	-2.67075e-10
		0.03154	-6.36486e-11	-1.21057e-10	-2.68323e-10
		0.03156	-6.42726e-11	-1.20433e-10	-2.67699e-10
		0.03158	-6.36486e-11	-1.21057e-10	-2.68947e-10
		0.0316	-6.36486e-11	-1.21681e-10	-2.68947e-10
		0.03162	-6.42726e-11	-1.21057e-10	-2.68947e-10
		0.03164	-6.36486e-11	-1.21057e-10	-2.69571e-10
		0.03166	-6.55206e-11	-1.22305e-10	-2.72067e-10
		0.03168	-6.67686e-11	-1.20433e-10	-2.71443e-10
		0.0317	-6.80166e-11	-1.21057e-10	-2.70819e-10
		0.03172	-6.73926e-11	-1.20433e-10	-2.72067e-10
		0.03174	-6.55206e-11	-1.21057e-10	-2.67075e-10
		0.03176	-6.30246e-11	-1.22929e-10	-2.65202e-10
		0.03178	-6.11526e-11	-1.24177e-10	-2.6333e-10
		0.0318	-6.17766e-11	-1.23553e-10	-2.62706e-10
		0.03182	-6.36486e-11	-1.23553e-10	-2.60834e-10
		0.03184	-6.55206e-11	-1.19809e-10	-2.62706e-10
		0.03186	-6.67686e-11	-1.19809e-10	-2.63954e-10
		0.03188	-6.55206e-11	-1.18561e-10	-2.64578e-10
		0.0319	-6.42726e-11	-1.19809e-10	-2.6645e-10
		0.03192	-6.36486e-11	-1.18561e-10	-2.67075e-10
		0.03194	-6.30246e-11	-1.19809e-10	-2.68323e-10
		0.03196	-6.17766e-11	-1.20433e-10	-2.68947e-10
		0.03198	-6.30246e-11	-1.21057e-10	-2.68323e-10
		0.032	-6.24006e-11	-1.22305e-10	-2.68947e-10
		0.03202	-6.24006e-11	-1.21681e-10	-2.68323e-10
		0.03204	-6.36486e-11	-1.20433e-10	-2.67075e-10
		0.03206	-6.30246e-11	-1.19809e-10	-2.65826e-10
		0.03208	-6.30246e-11	-1.19809e-10	-2.65202e-10
		0.0321	-6.48966e-11	-1.19809e-10	-2.65826e-10
		0.03212	-6.42726e-11	-1.19185e-10	-2.6645e-10
		0.03214	-6.61446e-11	-1.20433e-10	-2.67699e-10
		0.03216	-6.61446e-11	-1.21681e-10	-2.6645e-10
		0.03218	-6.61446e-11	-1.20433e-10	-2.65202e-10
		0.0322	-6.73926e-11	-1.19809e-10	-2.65202e-10
		0.03222	-6.61446e-11	-1.20433e-10	-2.64578e-10
		0.03224	-6.61446e-11	-1.20433e-10	-2.65826e-10
		0.03226	-6.48966e-11	-1.21057e-10	-2.65826e-10
		0.03228	-6.67686e-11	-1.19185e-10	-2.67075e-10
		0.0323	-6.73926e-11	-1.19185e-10	-2.67075e-10
		0.03232	-6.86406e-11	-1.18561e-10	-2.6645e-10
		0.03234	-6.86406e-11	-1.19185e-10	-2.65202e-10
		0.03236	-6.98887e-11	-1.17937e-10	-2.64578e-10
		0.03238	-6.80166e-11	-1.18561e-10	-2.64578e-10
		0.0324	-6.55206e-11	-1.19809e-10	-2.64578e-10
		0.03242	-6.30246e-11	-1.21057e-10	-2.65202e-10
		0.03244	-6.11526e-11	-1.20433e-10	-2.67075e-10
		0.03246	-6.36486e-11	-1.21681e-10	-2.6645e-10
		0.03248	-6.30246e-11	-1.19809e-10	-2.65202e-10
		0.0325	-6.92646e-11	-1.19185e-10	-2.65826e-10
		0.03252	-7.05127e-11	-1.17937e-10	-2.6645e-10
		0.03254	-6.92646e-11	-1.16689e-10	-2.64578e-10
		0.03256	-6.92646e-11	-1.17937e-10	-2.65826e-10
		0.03258	-6.73926e-11	-1.20433e-10	-2.65826e-10
		0.0326	-6.42726e-11	-1.22305e-10	-2.65202e-10
		0.03262	-6.36486e-11	-1.22929e-10	-2.63954e-10
		0.03264	-6.30246e-11	-1.20433e-10	-2.62706e-10
		0.03266	-6.36486e-11	-1.18561e-10	-2.61458e-10
		0.03268	-6.42726e-11	-1.18561e-10	-2.62082e-10
		0.0327	-6.61446e-11	-1.18561e-10	-2.61458e-10
		0.03272	-6.48966e-11	-1.17937e-10	-2.62082e-10
		0.03274	-6.48966e-11	-1.18561e-10	-2.62706e-10
		0.03276	-6.24006e-11	-1.21681e-10	-2.64578e-10
		0.03278	-6.30246e-11	-1.20433e-10	-2.64578e-10
		0.0328	-6.36486e-11	-1.21681e-10	-2.6645e-10
		0.03282	-6.61446e-11	-1.21057e-10	-2.6645e-10
		0.03284	-6.86406e-11	-1.21057e-10	-2.67699e-10
		0.03286	-6.80166e-11	-1.21681e-10	-2.67699e-10
		0.03288	-6.67686e-11	-1.21057e-10	-2.65826e-10
		0.0329	-6.48966e-11	-1.21681e-10	-2.65826e-10
		0.03292	-6.05286e-11	-1.21681e-10	-2.63954e-10
		0.03294	-6.17766e-11	-1.20433e-10	-2.64578e-10
		0.03296	-6.05286e-11	-1.20433e-10	-2.62082e-10
		0.03298	-6.05286e-11	-1.20433e-10	-2.60834e-10
		0.033	-6.17766e-11	-1.20433e-10	-2.59586e-10
		0.03302	-6.42726e-11	-1.18561e-10	-2.60834e-10
		0.03304	-6.80166e-11	-1.19185e-10	-2.60834e-10
		0.03306	-6.73926e-11	-1.19185e-10	-2.61458e-10
		0.03308	-6.86406e-11	-1.21681e-10	-2.63954e-10
		0.0331	-6.73926e-11	-1.22929e-10	-2.63954e-10
		0.03312	-6.80166e-11	-1.23553e-10	-2.64578e-10
		0.03314	-6.61446e-11	-1.23553e-10	-2.6333e-10
		0.03316	-6.86406e-11	-1.24177e-10	-2.62706e-10
		0.03318	-6.86406e-11	-1.22929e-10	-2.62706e-10
		0.0332	-6.86406e-11	-1.21057e-10	-2.6333e-10
		0.03322	-6.86406e-11	-1.19809e-10	-2.62706e-10
		0.03324	-6.67686e-11	-1.20433e-10	-2.63954e-10
		0.03326	-6.48966e-11	-1.21057e-10	-2.6333e-10
		0.03328	-6.17766e-11	-1.22305e-10	-2.64578e-10
		0.0333	-6.17766e-11	-1.23553e-10	-2.64578e-10
		0.03332	-6.17766e-11	-1.23553e-10	-2.65826e-10
		0.03334	-6.36486e-11	-1.19809e-10	-2.65826e-10
		0.03336	-6.48966e-11	-1.19809e-10	-2.63954e-10
		0.03338	-6.61446e-11	-1.19185e-10	-2.65202e-10
		0.0334	-6.61446e-11	-1.18561e-10	-2.63954e-10
		0.03342	-6.48966e-11	-1.19185e-10	-2.6645e-10
		0.03344	-6.42726e-11	-1.22305e-10	-2.6645e-10
		0.03346	-6.48966e-11	-1.22929e-10	-2.6645e-10
		0.03348	-6.48966e-11	-1.24801e-10	-2.6645e-10
		0.0335	-6.55206e-11	-1.24177e-10	-2.64578e-10
		0.03352	-6.61446e-11	-1.23553e-10	-2.65202e-10
		0.03354	-6.67686e-11	-1.22929e-10	-2.6333e-10
		0.03356	-6.55206e-11	-1.22305e-10	-2.65202e-10
		0.03358	-6.61446e-11	-1.21681e-10	-2.65202e-10
		0.0336	-6.48966e-11	-1.22929e-10	-2.65826e-10
		0.03362	-6.61446e-11	-1.22305e-10	-2.64578e-10
		0.03364	-6.67686e-11	-1.21681e-10	-2.64578e-10
		0.03366	-6.67686e-11	-1.20433e-10	-2.62706e-10
		0.03368	-6.73926e-11	-1.21057e-10	-2.62082e-10
		0.0337	-6.73926e-11	-1.20433e-10	-2.60834e-10
		0.03372	-6.55206e-11	-1.19809e-10	-2.60834e-10
		0.03374	-6.48966e-11	-1.20433e-10	-2.6333e-10
		0.03376	-6.24006e-11	-1.20433e-10	-2.63954e-10
		0.03378	-6.24006e-11	-1.21681e-10	-2.65202e-10
		0.0338	-6.30246e-11	-1.20433e-10	-2.65826e-10
		0.03382	-6.48966e-11	-1.19809e-10	-2.65202e-10
		0.03384	-6.55206e-11	-1.19185e-10	-2.64578e-10
		0.03386	-6.61446e-11	-1.17313e-10	-2.63954e-10
		0.03388	-6.55206e-11	-1.16689e-10	-2.62706e-10
		0.0339	-6.55206e-11	-1.15441e-10	-2.62082e-10
		0.03392	-6.36486e-11	-1.17313e-10	-2.6333e-10
		0.03394	-6.17766e-11	-1.17313e-10	-2.62706e-10
		0.03396	-6.24006e-11	-1.17313e-10	-2.6333e-10
		0.03398	-6.42726e-11	-1.19809e-10	-2.64578e-10
		0.034	-6.67686e-11	-1.20433e-10	-2.65202e-10
		0.03402	-6.80166e-11	-1.21057e-10	-2.65202e-10
		0.03404	-6.92646e-11	-1.21681e-10	-2.65826e-10
		0.03406	-6.67686e-11	-1.22305e-10	-2.64578e-10
		0.03408	-6.73926e-11	-1.22929e-10	-2.65826e-10
		0.0341	-6.42726e-11	-1.23553e-10	-2.65202e-10
		0.03412	-6.36486e-11	-1.23553e-10	-2.64578e-10
		0.03414	-6.42726e-11	-1.23553e-10	-2.63954e-10
		0.03416	-6.55206e-11	-1.23553e-10	-2.6333e-10
		0.03418	-6.61446e-11	-1.22305e-10	-2.60834e-10
		0.0342	-6.48966e-11	-1.22305e-10	-2.61458e-10
		0.03422	-6.67686e-11	-1.22929e-10	-2.62706e-10
		0.03424	-6.61446e-11	-1.22929e-10	-2.63954e-10
		0.03426	-6.73926e-11	-1.22305e-10	-2.65826e-10
		0.03428	-6.73926e-11	-1.21681e-10	-2.63954e-10
		0.0343	-6.86406e-11	-1.21057e-10	-2.65202e-10
		0.03432	-7.05127e-11	-1.23553e-10	-2.62706e-10
		0.03434	-6.98887e-11	-1.23553e-10	-2.63954e-10
		0.03436	-6.86406e-11	-1.23553e-10	-2.6333e-10
		0.03438	-6.61446e-11	-1.24177e-10	-2.6333e-10
		0.0344	-6.48966e-11	-1.23553e-10	-2.64578e-10
		0.03442	-6.30246e-11	-1.22929e-10	-2.65202e-10
		0.03444	-5.99046e-11	-1.22305e-10	-2.65826e-10
		0.03446	-5.92806e-11	-1.21681e-10	-2.65202e-10
		0.03448	-6.05286e-11	-1.20433e-10	-2.64578e-10
		0.0345	-6.17766e-11	-1.18561e-10	-2.64578e-10
		0.03452	-6.42726e-11	-1.18561e-10	-2.6333e-10
		0.03454	-6.92646e-11	-1.17313e-10	-2.65826e-10
		0.03456	-6.98887e-11	-1.18561e-10	-2.6645e-10
		0.03458	-7.17607e-11	-1.18561e-10	-2.65202e-10
		0.0346	-7.17607e-11	-1.17937e-10	-2.6645e-10
		0.03462	-6.98887e-11	-1.17313e-10	-2.67699e-10
		0.03464	-6.98887e-11	-1.16689e-10	-2.67699e-10
		0.03466	-6.92646e-11	-1.17313e-10	-2.68323e-10
		0.03468	-6.67686e-11	-1.17937e-10	-2.67075e-10
		0.0347	-6.80166e-11	-1.18561e-10	-2.65826e-10
		0.03472	-6.55206e-11	-1.19185e-10	-2.64578e-10
		0.03474	-6.48966e-11	-1.18561e-10	-2.63954e-10
		0.03476	-6.30246e-11	-1.19809e-10	-2.63954e-10
		0.03478	-6.42726e-11	-1.21057e-10	-2.6333e-10
		0.0348	-6.30246e-11	-1.22929e-10	-2.62706e-10
		0.03482	-6.42726e-11	-1.21057e-10	-2.6333e-10
		0.03484	-6.55206e-11	-1.21057e-10	-2.62082e-10
		0.03486	-6.48966e-11	-1.21681e-10	-2.6333e-10
		0.03488	-6.55206e-11	-1.20433e-10	-2.6333e-10
		0.0349	-6.61446e-11	-1.19809e-10	-2.65202e-10
		0.03492	-6.55206e-11	-1.19809e-10	-2.65826e-10
		0.03494	-6.48966e-11	-1.18561e-10	-2.67075e-10
		0.03496	-6.73926e-11	-1.19185e-10	-2.67699e-10
		0.03498	-6.61446e-11	-1.16689e-10	-2.68323e-10
		0.035	-6.80166e-11	-1.17313e-10	-2.70819e-10
		0.03502	-6.80166e-11	-1.17313e-10	-2.70195e-10
		0.03504	-6.80166e-11	-1.17313e-10	-2.70819e-10
		0.03506	-6.86406e-11	-1.17313e-10	-2.71443e-10
		0.03508	-6.48966e-11	-1.17313e-10	-2.72067e-10
		0.0351	-6.42726e-11	-1.18561e-10	-2.72691e-10
		0.03512	-6.30246e-11	-1.19185e-10	-2.70819e-10
		0.03514	-6.24006e-11	-1.17937e-10	-2.72067e-10
		0.03516	-6.30246e-11	-1.17937e-10	-2.68947e-10
		0.03518	-6.30246e-11	-1.19809e-10	-2.68323e-10
		0.0352	-6.17766e-11	-1.19809e-10	-2.67699e-10
		0.03522	-6.30246e-11	-1.22929e-10	-2.67075e-10
		0.03524	-6.24006e-11	-1.24177e-10	-2.6645e-10
		0.03526	-5.99046e-11	-1.24177e-10	-2.67699e-10
		0.03528	-6.05286e-11	-1.22305e-10	-2.68947e-10
		0.0353	-6.05286e-11	-1.21681e-10	-2.70195e-10
		0.03532	-6.05286e-11	-1.21057e-10	-2.70819e-10
		0.03534	-6.24006e-11	-1.21681e-10	-2.70819e-10
		0.03536	-6.42726e-11	-1.20433e-10	-2.72067e-10
		0.03538	-6.61446e-11	-1.21681e-10	-2.72691e-10
		0.0354	-6.48966e-11	-1.22929e-10	-2.72067e-10
		0.03542	-6.48966e-11	-1.24177e-10	-2.70195e-10
		0.03544	-6.48966e-11	-1.26673e-10	-2.70195e-10
		0.03546	-6.48966e-11	-1.26049e-10	-2.68947e-10
		0.03548	-6.55206e-11	-1.26673e-10	-2.65826e-10
		0.0355	-6.42726e-11	-1.26049e-10	-2.62706e-10
		0.03552	-6.55206e-11	-1.25425e-10	-2.62082e-10
		0.03554	-6.61446e-11	-1.25425e-10	-2.6021e-10
		0.03556	-6.67686e-11	-1.24801e-10	-2.6021e-10
		0.03558	-6.67686e-11	-1.24801e-10	-2.62082e-10
		0.0356	-6.55206e-11	-1.25425e-10	-2.62082e-10
		0.03562	-6.48966e-11	-1.24801e-10	-2.62082e-10
		0.03564	-6.48966e-11	-1.24177e-10	-2.62082e-10
		0.03566	-6.36486e-11	-1.23553e-10	-2.63954e-10
		0.03568	-6.55206e-11	-1.22305e-10	-2.62706e-10
		0.0357	-6.48966e-11	-1.22305e-10	-2.62706e-10
		0.03572	-6.61446e-11	-1.19809e-10	-2.62706e-10
		0.03574	-6.73926e-11	-1.19185e-10	-2.65202e-10
		0.03576	-6.73926e-11	-1.18561e-10	-2.67075e-10
		0.03578	-6.42726e-11	-1.18561e-10	-2.67075e-10
		0.0358	-6.36486e-11	-1.17313e-10	-2.68947e-10
		0.03582	-6.17766e-11	-1.15441e-10	-2.68323e-10
		0.03584	-6.30246e-11	-1.16065e-10	-2.67699e-10
		0.03586	-6.30246e-11	-1.14193e-10	-2.65826e-10
		0.03588	-6.36486e-11	-1.15441e-10	-2.64578e-10
		0.0359	-6.55206e-11	-1.17313e-10	-2.63954e-10
		0.03592	-6.55206e-11	-1.17313e-10	-2.6333e-10
		0.03594	-6.55206e-11	-1.19185e-10	-2.62082e-10
		0.03596	-6.55206e-11	-1.19809e-10	-2.60834e-10
		0.03598	-6.55206e-11	-1.20433e-10	-2.62082e-10
		0.036	-6.67686e-11	-1.19809e-10	-2.60834e-10
		0.03602	-6.80166e-11	-1.18561e-10	-2.62082e-10
		0.03604	-7.11367e-11	-1.17937e-10	-2.63954e-10
		0.03606	-6.98887e-11	-1.17313e-10	-2.65826e-10
		0.03608	-6.98887e-11	-1.19185e-10	-2.64578e-10
		0.0361	-6.67686e-11	-1.22305e-10	-2.62706e-10
		0.03612	-6.42726e-11	-1.22305e-10	-2.62706e-10
		0.03614	-6.42726e-11	-1.23553e-10	-2.61458e-10
		0.03616	-6.61446e-11	-1.23553e-10	-2.6021e-10
		0.03618	-6.67686e-11	-1.23553e-10	-2.59586e-10
		0.0362	-6.73926e-11	-1.22305e-10	-2.60834e-10
		0.03622	-6.98887e-11	-1.21681e-10	-2.63954e-10
		0.03624	-7.11367e-11	-1.21057e-10	-2.65202e-10
		0.03626	-6.98887e-11	-1.21681e-10	-2.6645e-10
		0.03628	-6.80166e-11	-1.21681e-10	-2.68947e-10
		0.0363	-6.73926e-11	-1.21681e-10	-2.69571e-10
		0.03632	-6.42726e-11	-1.21057e-10	-2.68323e-10
		0.03634	-6.17766e-11	-1.21681e-10	-2.67699e-10
		0.03636	-6.24006e-11	-1.20433e-10	-2.6645e-10
		0.03638	-6.17766e-11	-1.19185e-10	-2.63954e-10
		0.0364	-6.11526e-11	-1.18561e-10	-2.64578e-10
		0.03642	-6.30246e-11	-1.19809e-10	-2.64578e-10
		0.03644	-6.30246e-11	-1.19185e-10	-2.65202e-10
		0.03646	-6.24006e-11	-1.19809e-10	-2.65202e-10
		0.03648	-6.17766e-11	-1.19809e-10	-2.64578e-10
		0.0365	-6.24006e-11	-1.17313e-10	-2.65826e-10
		0.03652	-6.36486e-11	-1.17313e-10	-2.6645e-10
		0.03654	-6.30246e-11	-1.15441e-10	-2.65202e-10
		0.03656	-6.42726e-11	-1.15441e-10	-2.65202e-10
		0.03658	-6.24006e-11	-1.16689e-10	-2.65826e-10
		0.0366	-6.42726e-11	-1.17937e-10	-2.67075e-10
		0.03662	-6.11526e-11	-1.18561e-10	-2.67075e-10
		0.03664	-6.11526e-11	-1.20433e-10	-2.68947e-10
		0.03666	-6.05286e-11	-1.20433e-10	-2.67075e-10
		0.03668	-6.11526e-11	-1.21057e-10	-2.67699e-10
		0.0367	-6.11526e-11	-1.19185e-10	-2.67075e-10
		0.03672	-6.24006e-11	-1.16689e-10	-2.6645e-10
		0.03674	-6.24006e-11	-1.17313e-10	-2.6645e-10
		0.03676	-6.24006e-11	-1.15441e-10	-2.67699e-10
		0.03678	-6.48966e-11	-1.17313e-10	-2.67699e-10
		0.0368	-6.42726e-11	-1.17313e-10	-2.67075e-10
		0.03682	-6.42726e-11	-1.18561e-10	-2.67075e-10
		0.03684	-6.36486e-11	-1.19809e-10	-2.65202e-10
		0.03686	-6.55206e-11	-1.20433e-10	-2.64578e-10
		0.03688	-6.55206e-11	-1.19809e-10	-2.6645e-10
		0.0369	-6.67686e-11	-1.18561e-10	-2.65826e-10
		0.03692	-6.61446e-11	-1.20433e-10	-2.68323e-10
		0.03694	-6.67686e-11	-1.20433e-10	-2.70195e-10
		0.03696	-6.86406e-11	-1.21057e-10	-2.70819e-10
		0.03698	-6.80166e-11	-1.22305e-10	-2.70195e-10
		0.037	-6.92646e-11	-1.22305e-10	-2.68947e-10
		0.03702	-7.17607e-11	-1.20433e-10	-2.68323e-10
		0.03704	-7.05127e-11	-1.19185e-10	-2.67075e-10
		0.03706	-7.11367e-11	-1.17937e-10	-2.6645e-10
		0.03708	-6.80166e-11	-1.15441e-10	-2.67075e-10
		0.0371	-6.67686e-11	-1.13569e-10	-2.64578e-10
		0.03712	-6.36486e-11	-1.13569e-10	-2.63954e-10
		0.03714	-6.17766e-11	-1.12945e-10	-2.63954e-10
		0.03716	-5.99046e-11	-1.14817e-10	-2.62082e-10
		0.03718	-5.92806e-11	-1.16689e-10	-2.6021e-10
		0.0372	-5.99046e-11	-1.17313e-10	-2.59586e-10
		0.03722	-6.11526e-11	-1.17937e-10	-2.60834e-10
		0.03724	-6.30246e-11	-1.19185e-10	-2.60834e-10
		0.03726	-6.48966e-11	-1.21057e-10	-2.62082e-10
		0.03728	-6.55206e-11	-1.22305e-10	-2.62082e-10
		0.0373	-6.61446e-11	-1.21681e-10	-2.62082e-10
		0.03732	-6.48966e-11	-1.21681e-10	-2.6333e-10
		0.03734	-6.61446e-11	-1.21057e-10	-2.63954e-10
		0.03736	-6.61446e-11	-1.21057e-10	-2.64578e-10
		0.03738	-6.55206e-11	-1.17937e-10	-2.65826e-10
		0.0374	-6.36486e-11	-1.17313e-10	-2.64578e-10
		0.03742	-6.17766e-11	-1.18561e-10	-2.64578e-10
		0.03744	-6.36486e-11	-1.18561e-10	-2.65826e-10
		0.03746	-6.30246e-11	-1.19185e-10	-2.64578e-10
		0.03748	-6.30246e-11	-1.19809e-10	-2.64578e-10
		0.0375	-6.36486e-11	-1.19809e-10	-2.6333e-10
		0.03752	-6.30246e-11	-1.18561e-10	-2.61458e-10
		0.03754	-6.48966e-11	-1.17937e-10	-2.6333e-10
		0.03756	-6.80166e-11	-1.17313e-10	-2.62706e-10
		0.03758	-6.67686e-11	-1.18561e-10	-2.62082e-10
		0.0376	-6.80166e-11	-1.20433e-10	-2.63954e-10
		0.03762	-6.86406e-11	-1.20433e-10	-2.63954e-10
		0.03764	-7.05127e-11	-1.20433e-10	-2.65202e-10
		0.03766	-6.86406e-11	-1.20433e-10	-2.65826e-10
		0.03768	-6.73926e-11	-1.19809e-10	-2.6645e-10
		0.0377	-6.73926e-11	-1.19809e-10	-2.65826e-10
		0.03772	-6.55206e-11	-1.19185e-10	-2.65826e-10
		0.03774	-6.48966e-11	-1.18561e-10	-2.6645e-10
		0.03776	-6.30246e-11	-1.19809e-10	-2.65202e-10
		0.03778	-6.11526e-11	-1.19185e-10	-2.65202e-10
		0.0378	-6.17766e-11	-1.17937e-10	-2.64578e-10
		0.03782	-6.30246e-11	-1.18561e-10	-2.63954e-10
		0.03784	-6.48966e-11	-1.17313e-10	-2.62706e-10
		0.03786	-6.55206e-11	-1.20433e-10	-2.6333e-10
		0.03788	-6.48966e-11	-1.24177e-10	-2.62706e-10
		0.0379	-6.67686e-11	-1.29169e-10	-2.62082e-10
		0.03792	-6.61446e-11	-1.34161e-10	-2.64578e-10
		0.03794	-6.67686e-11	-1.39777e-10	-2.67075e-10
		0.03796	-6.80166e-11	-1.45393e-10	-2.6645e-10
		0.03798	-6.67686e-11	-1.48513e-10	-2.6645e-10
		0.038	-6.67686e-11	-1.49761e-10	-2.6645e-10
		0.03802	-6.67686e-11	-1.52257e-10	-2.65826e-10
		0.03804	-6.48966e-11	-1.52257e-10	-2.63954e-10
		0.03806	-6.36486e-11	-1.52257e-10	-2.64578e-10
		0.03808	-6.24006e-11	-1.54129e-10	-2.6333e-10
		0.0381	-6.36486e-11	-1.51009e-10	-2.62706e-10
		0.03812	-6.36486e-11	-1.50385e-10	-2.63954e-10
		0.03814	-6.42726e-11	-1.46017e-10	-2.62082e-10
		0.03816	-6.36486e-11	-1.46017e-10	-2.64578e-10
		0.03818	-6.55206e-11	-1.41649e-10	-2.6333e-10
		0.0382	-6.55206e-11	-1.41649e-10	-2.63954e-10
		0.03822	-6.55206e-11	-1.39153e-10	-2.63954e-10
		0.03824	-6.42726e-11	-1.38529e-10	-2.63954e-10
		0.03826	-6.48966e-11	-1.37281e-10	-2.65202e-10
		0.03828	-6.42726e-11	-1.37281e-10	-2.64578e-10
		0.0383	-6.36486e-11	-1.34785e-10	-2.64578e-10
		0.03832	-6.42726e-11	-1.34161e-10	-2.64578e-10
		0.03834	-6.55206e-11	-1.32913e-10	-2.64578e-10
		0.03836	-6.55206e-11	-1.30417e-10	-2.6333e-10
		0.03838	-6.42726e-11	-1.29169e-10	-2.64578e-10
		0.0384	-6.48966e-11	-1.28545e-10	-2.6645e-10
		0.03842	-6.42726e-11	-1.26673e-10	-2.67075e-10
		0.03844	-6.30246e-11	-1.26049e-10	-2.68947e-10
		0.03846	-6.36486e-11	-1.23553e-10	-2.68323e-10
		0.03848	-6.30246e-11	-1.22929e-10	-2.67075e-10
		0.0385	-6.11526e-11	-1.20433e-10	-2.65202e-10
		0.03852	-6.05286e-11	-1.20433e-10	-2.65202e-10
		0.03854	-6.05286e-11	-1.19185e-10	-2.65826e-10
		0.03856	-5.99046e-11	-1.21057e-10	-2.6645e-10
		0.03858	-6.11526e-11	-1.22305e-10	-2.67699e-10
		0.0386	-5.92806e-11	-1.23553e-10	-2.68323e-10
		0.03862	-5.86565e-11	-1.25425e-10	-2.68947e-10
		0.03864	-6.05286e-11	-1.24801e-10	-2.67075e-10
		0.03866	-6.11526e-11	-1.24801e-10	-2.6645e-10
		0.03868	-6.24006e-11	-1.23553e-10	-2.65202e-10
		0.0387	-6.48966e-11	-1.21057e-10	-2.63954e-10
		0.03872	-6.86406e-11	-1.20433e-10	-2.64578e-10
		0.03874	-6.92646e-11	-1.19809e-10	-2.65826e-10
		0.03876	-6.98887e-11	-1.18561e-10	-2.67699e-10
		0.03878	-6.92646e-11	-1.18561e-10	-2.6645e-10
		0.0388	-6.98887e-11	-1.20433e-10	-2.65826e-10
		0.03882	-6.80166e-11	-1.22929e-10	-2.65202e-10
		0.03884	-6.73926e-11	-1.24177e-10	-2.64578e-10
		0.03886	-6.61446e-11	-1.26049e-10	-2.62082e-10
		0.03888	-6.36486e-11	-1.24801e-10	-2.61458e-10
		0.0389	-6.30246e-11	-1.26049e-10	-2.62706e-10
		0.03892	-6.17766e-11	-1.24801e-10	-2.64578e-10
		0.03894	-6.30246e-11	-1.24801e-10	-2.65202e-10
		0.03896	-6.55206e-11	-1.21681e-10	-2.67075e-10
		0.03898	-6.67686e-11	-1.21681e-10	-2.6645e-10
		0.039	-6.80166e-11	-1.19809e-10	-2.6645e-10
		0.03902	-6.98887e-11	-1.21057e-10	-2.6645e-10
		0.03904	-7.17607e-11	-1.21681e-10	-2.65826e-10
		0.03906	-7.11367e-11	-1.23553e-10	-2.63954e-10
		0.03908	-7.05127e-11	-1.25425e-10	-2.62706e-10
		0.0391	-7.11367e-11	-1.26673e-10	-2.6333e-10
		0.03912	-6.98887e-11	-1.27297e-10	-2.63954e-10
		0.03914	-6.86406e-11	-1.27297e-10	-2.65826e-10
		0.03916	-6.86406e-11	-1.26673e-10	-2.65826e-10
		0.03918	-6.67686e-11	-1.24801e-10	-2.65202e-10
		0.0392	-6.55206e-11	-1.22305e-10	-2.64578e-10
		0.03922	-6.36486e-11	-1.19809e-10	-2.64578e-10
		0.03924	-6.24006e-11	-1.18561e-10	-2.64578e-10
		0.03926	-6.11526e-11	-1.16689e-10	-2.63954e-10
		0.03928	-6.17766e-11	-1.14817e-10	-2.65826e-10
		0.0393	-6.24006e-11	-1.14193e-10	-2.64578e-10
		0.03932	-6.36486e-11	-1.15441e-10	-2.63954e-10
		0.03934	-6.48966e-11	-1.15441e-10	-2.6645e-10
		0.03936	-6.61446e-11	-1.17937e-10	-2.65826e-10
		0.03938	-6.48966e-11	-1.17937e-10	-2.67699e-10
		0.0394	-6.42726e-11	-1.19809e-10	-2.68323e-10
		0.03942	-6.42726e-11	-1.19809e-10	-2.67699e-10
		0.03944	-6.36486e-11	-1.20433e-10	-2.68323e-10
		0.03946	-6.42726e-11	-1.23553e-10	-2.67075e-10
		0.03948	-6.36486e-11	-1.22305e-10	-2.65826e-10
		0.0395	-6.67686e-11	-1.22929e-10	-2.63954e-10
		0.03952	-6.61446e-11	-1.22305e-10	-2.61458e-10
		0.03954	-6.67686e-11	-1.21681e-10	-2.60834e-10
		0.03956	-6.61446e-11	-1.22929e-10	-2.60834e-10
		0.03958	-6.61446e-11	-1.22929e-10	-2.60834e-10
		0.0396	-6.48966e-11	-1.22305e-10	-2.6333e-10
		0.03962	-6.55206e-11	-1.21681e-10	-2.64578e-10
		0.03964	-6.48966e-11	-1.21057e-10	-2.64578e-10
		0.03966	-6.73926e-11	-1.19809e-10	-2.63954e-10
		0.03968	-6.73926e-11	-1.17313e-10	-2.65826e-10
		0.0397	-6.80166e-11	-1.17313e-10	-2.64578e-10
		0.03972	-6.92646e-11	-1.16689e-10	-2.6645e-10
		0.03974	-6.80166e-11	-1.15441e-10	-2.67075e-10
		0.03976	-6.92646e-11	-1.16689e-10	-2.67075e-10
		0.03978	-6.86406e-11	-1.19809e-10	-2.67075e-10
		0.0398	-6.67686e-11	-1.19185e-10	-2.67075e-10
		0.03982	-6.55206e-11	-1.20433e-10	-2.68323e-10
		0.03984	-6.30246e-11	-1.22305e-10	-2.67699e-10
		0.03986	-6.05286e-11	-1.21681e-10	-2.67075e-10
		0.03988	-5.92806e-11	-1.21057e-10	-2.67075e-10
		0.0399	-6.05286e-11	-1.19185e-10	-2.67075e-10
		0.03992	-6.11526e-11	-1.20433e-10	-2.68323e-10
[truncated: 198,305+ more rows]

## Sheet: 100 Hz data, Fig 2B
		Figure 2B1_sample EPSC traces					Figure 2B1_normalized EPSC amplitude vs stimulation (#)								Figure 2B1_average depression at EPSCs (#26-30)					Figure 2B2_normalized recovery from STD vs time interval (s)
		Time (s)	Control	Dynasore	Pitstop-2		Stimulation (#)	Control		Dynasore		Pitstop-2				Control	Dynasore	Pitstop-2		Time interval (s)	Control		Dynasore		Pitstop-2
								Mean	SEM	Mean	SEM	Mean	SEM		Mean	0.42	0.247	0.257			Mean	SEM	Mean	SEM	Mean	SEM
		0	-1.37905e-10	-1.08577e-10	-1.26049e-10		1	1	0	1	0	1	0		SEM	0.025	0.019	0.026		0.02	-0.017	0.04	0.041	0.015	0.032	0.01
		2e-05	-1.35409e-10	-1.08577e-10	-1.26049e-10		2	0.914144	0.0450156	0.5977	0.0315106	0.645389	0.0630804		n number	11	10	7		0.1	0.21	0.04	0.346	0.018	0.379	0.023
		4e-05	-1.37281e-10	-1.07329e-10	-1.24177e-10		3	0.742523	0.0342344	0.474434	0.0304129	0.471125	0.0605262		p-value	--	3e-05	0.00039		0.3	0.32	0.07	0.524	0.032	0.512	0.045
		6e-05	-1.37281e-10	-1.05457e-10	-1.22305e-10		4	0.66649	0.0413973	0.418989	0.0322916	0.41132	0.0479439							1	0.578	0.06	0.73	0.047	0.725	0.036
		8e-05	-1.38529e-10	-1.04209e-10	-1.22929e-10		5	0.581314	0.0226505	0.362429	0.0263397	0.359824	0.0476437							3	0.778	0.05	0.894	0.007	0.894	0.022
		0.0001	-1.40401e-10	-1.06081e-10	-1.21681e-10		6	0.576572	0.0386438	0.350706	0.0293184	0.333619	0.0415068							8	0.919	0.04	0.989	0.013	0.996	0.012
		0.00012	-1.39777e-10	-1.04833e-10	-1.23553e-10		7	0.536316	0.0310202	0.310697	0.0239441	0.297825	0.039141							12	1.011	0.07	0.983	0.016	1.026	0.027
		0.00014	-1.39777e-10	-1.06081e-10	-1.23553e-10		8	0.497604	0.040873	0.29163	0.0275791	0.284	0.0341389							20	1.003	0.04	0.962	0.019	1	0.027
		0.00016	-1.39153e-10	-1.07953e-10	-1.23553e-10		9	0.519302	0.044607	0.296033	0.0224868	0.255027	0.0255284
		0.00018	-1.37281e-10	-1.07329e-10	-1.22929e-10		10	0.487858	0.0379936	0.276632	0.0230961	0.264619	0.0346852
		0.0002	-1.36033e-10	-1.07329e-10	-1.27921e-10		11	0.459895	0.0292918	0.276539	0.0255992	0.229698	0.0313587
		0.00022	-1.37281e-10	-1.06705e-10	-1.28545e-10		12	0.47583	0.0298012	0.256811	0.0140434	0.224701	0.0290179
		0.00024	-1.36033e-10	-1.06081e-10	-1.30417e-10		13	0.448902	0.0313305	0.257974	0.0302239	0.253395	0.0322619
		0.00026	-1.37281e-10	-1.07329e-10	-1.31041e-10		14	0.416092	0.0245509	0.259182	0.0178315	0.243804	0.0225715
		0.00028	-1.38529e-10	-1.07953e-10	-1.31665e-10		15	0.434895	0.0304184	0.235412	0.0224448	0.226618	0.0206004
		0.0003	-1.40401e-10	-1.08577e-10	-1.31041e-10		16	0.448356	0.0270056	0.257353	0.0227807	0.23829	0.0205518
		0.00032	-1.39777e-10	-1.09825e-10	-1.27921e-10		17	0.407943	0.0159838	0.246994	0.0209921	0.219572	0.017704
		0.00034	-1.38529e-10	-1.09825e-10	-1.27297e-10		18	0.428792	0.031799	0.243105	0.0208552	0.24198	0.026184
		0.00036	-1.38529e-10	-1.08577e-10	-1.25425e-10		19	0.425482	0.0292754	0.235934	0.0190862	0.269604	0.0312515
		0.00038	-1.38529e-10	-1.07953e-10	-1.24177e-10		20	0.391545	0.0299297	0.253771	0.020191	0.244607	0.0216805
		0.0004	-1.37281e-10	-1.08577e-10	-1.23553e-10		21	0.421153	0.0286433	0.234479	0.017581	0.244302	0.0227884
		0.00042	-1.36033e-10	-1.05457e-10	-1.24177e-10		22	0.3925	0.0226653	0.263234	0.0283438	0.27294	0.0293331
		0.00044	-1.36657e-10	-1.05457e-10	-1.23553e-10		23	0.422186	0.0307324	0.248844	0.0223272	0.256275	0.0231348
		0.00046	-1.35409e-10	-1.05457e-10	-1.24177e-10		24	0.419849	0.0278429	0.248334	0.0188104	0.256184	0.0256702
		0.00048	-1.34785e-10	-1.04209e-10	-1.23553e-10		25	0.4346	0.029209	0.25112	0.0140347	0.255766	0.0283821
		0.0005	-1.34161e-10	-1.04833e-10	-1.22305e-10		26	0.415703	0.0368512	0.248305	0.0194366	0.25466	0.0295577
		0.00052	-1.32913e-10	-1.02337e-10	-1.26049e-10		27	0.406538	0.0276412	0.231788	0.023151	0.257265	0.026458
		0.00054	-1.35409e-10	-1.02961e-10	-1.28545e-10		28	0.436486	0.0300338	0.266371	0.0185599	0.2718	0.0276005
		0.00056	-1.34161e-10	-1.02337e-10	-1.31041e-10		29	0.419118	0.0243738	0.242547	0.0212499	0.244749	0.0285684
		0.00058	-1.35409e-10	-1.03585e-10	-1.31665e-10		30	0.418004	0.0247326	0.246563	0.0226868	0.255022	0.0279999
		0.0006	-1.38529e-10	-1.03585e-10	-1.31665e-10
		0.00062	-1.38529e-10	-1.04833e-10	-1.32289e-10
		0.00064	-1.38529e-10	-1.07329e-10	-1.31041e-10
		0.00066	-1.39777e-10	-1.08577e-10	-1.29793e-10
		0.00068	-1.37905e-10	-1.07329e-10	-1.29169e-10
		0.0007	-1.34785e-10	-1.07329e-10	-1.28545e-10
		0.00072	-1.34785e-10	-1.06705e-10	-1.27297e-10
		0.00074	-1.36033e-10	-1.07953e-10	-1.27297e-10
		0.00076	-1.35409e-10	-1.07953e-10	-1.26673e-10
		0.00078	-1.37281e-10	-1.07953e-10	-1.25425e-10
		0.0008	-1.39153e-10	-1.07953e-10	-1.22929e-10
		0.00082	-1.39777e-10	-1.07329e-10	-1.21681e-10
		0.00084	-1.41649e-10	-1.07953e-10	-1.21057e-10
		0.00086	-1.41649e-10	-1.07953e-10	-1.22929e-10
		0.00088	-1.42273e-10	-1.07329e-10	-1.25425e-10
		0.0009	-1.41025e-10	-1.07329e-10	-1.23553e-10
		0.00092	-1.39777e-10	-1.06705e-10	-1.26049e-10
		0.00094	-1.37905e-10	-1.07953e-10	-1.26049e-10
		0.00096	-1.36033e-10	-1.07953e-10	-1.25425e-10
		0.00098	-1.34161e-10	-1.07953e-10	-1.24801e-10
		0.001	-1.30417e-10	-1.06705e-10	-1.24801e-10
		0.00102	-1.31041e-10	-1.06081e-10	-1.26049e-10
		0.00104	-1.31665e-10	-1.06705e-10	-1.24177e-10
		0.00106	-1.32289e-10	-1.06705e-10	-1.26673e-10
		0.00108	-1.33537e-10	-1.06705e-10	-1.25425e-10
		0.0011	-1.36033e-10	-1.06081e-10	-1.26673e-10
		0.00112	-1.38529e-10	-1.06081e-10	-1.26673e-10
		0.00114	-1.39153e-10	-1.07953e-10	-1.27297e-10
		0.00116	-1.38529e-10	-1.04833e-10	-1.26673e-10
		0.00118	-1.39153e-10	-1.05457e-10	-1.26049e-10
		0.0012	-1.37905e-10	-1.04209e-10	-1.26673e-10
		0.00122	-1.38529e-10	-1.04209e-10	-1.26673e-10
		0.00124	-1.39153e-10	-1.05457e-10	-1.26049e-10
		0.00126	-1.36657e-10	-1.07329e-10	-1.25425e-10
		0.00128	-1.39153e-10	-1.06081e-10	-1.26049e-10
		0.0013	-1.39777e-10	-1.05457e-10	-1.25425e-10
		0.00132	-1.38529e-10	-1.06081e-10	-1.26049e-10
		0.00134	-1.39153e-10	-1.04209e-10	-1.27297e-10
		0.00136	-1.39153e-10	-1.03585e-10	-1.26673e-10
		0.00138	-1.39153e-10	-1.02337e-10	-1.29793e-10
		0.0014	-1.37281e-10	-1.02961e-10	-1.27297e-10
		0.00142	-1.36033e-10	-1.02337e-10	-1.26049e-10
		0.00144	-1.36657e-10	-1.03585e-10	-1.24801e-10
		0.00146	-1.36033e-10	-1.04833e-10	-1.23553e-10
		0.00148	-1.37905e-10	-1.05457e-10	-1.22305e-10
		0.0015	-1.38529e-10	-1.07329e-10	-1.22305e-10
		0.00152	-1.37905e-10	-1.07329e-10	-1.22929e-10
		0.00154	-1.39153e-10	-1.08577e-10	-1.23553e-10
		0.00156	-1.39777e-10	-1.08577e-10	-1.24801e-10
		0.00158	-1.39777e-10	-1.08577e-10	-1.26049e-10
		0.0016	-1.39777e-10	-1.07953e-10	-1.27297e-10
		0.00162	-1.38529e-10	-1.08577e-10	-1.26673e-10
		0.00164	-1.39777e-10	-1.11073e-10	-1.26673e-10
		0.00166	-1.39153e-10	-1.11697e-10	-1.26049e-10
		0.00168	-1.38529e-10	-1.11073e-10	-1.26673e-10
		0.0017	-1.36033e-10	-1.11073e-10	-1.27297e-10
		0.00172	-1.33537e-10	-1.10449e-10	-1.26673e-10
		0.00174	-1.35409e-10	-1.10449e-10	-1.26673e-10
		0.00176	-1.35409e-10	-1.09201e-10	-1.24801e-10
		0.00178	-1.34785e-10	-1.09201e-10	-1.23553e-10
		0.0018	-1.34785e-10	-1.09201e-10	-1.22305e-10
		0.00182	-1.35409e-10	-1.09201e-10	-1.21681e-10
		0.00184	-1.33537e-10	-1.06705e-10	-1.23553e-10
		0.00186	-1.34161e-10	-1.05457e-10	-1.24801e-10
		0.00188	-1.34161e-10	-1.05457e-10	-1.26049e-10
		0.0019	-1.34161e-10	-1.04209e-10	-1.26673e-10
		0.00192	-1.34161e-10	-1.04833e-10	-1.26673e-10
		0.00194	-1.35409e-10	-1.05457e-10	-1.26673e-10
		0.00196	-1.34785e-10	-1.04833e-10	-1.26673e-10
		0.00198	-1.34785e-10	-1.04833e-10	-1.24801e-10
		0.002	-1.34161e-10	-1.04833e-10	-1.24801e-10
		0.00202	-1.33537e-10	-1.07329e-10	-1.25425e-10
		0.00204	-1.32289e-10	-1.05457e-10	-1.26049e-10
		0.00206	-1.33537e-10	-1.06081e-10	-1.27297e-10
		0.00208	-1.34161e-10	-1.06081e-10	-1.27297e-10
		0.0021	-1.35409e-10	-1.06081e-10	-1.27297e-10
		0.00212	-1.37281e-10	-1.06081e-10	-1.26673e-10
		0.00214	-1.36033e-10	-1.06081e-10	-1.26049e-10
		0.00216	-1.37281e-10	-1.07953e-10	-1.26673e-10
		0.00218	-1.37905e-10	-1.06705e-10	-1.26049e-10
		0.0022	-1.37905e-10	-1.09201e-10	-1.24801e-10
		0.00222	-1.38529e-10	-1.09201e-10	-1.23553e-10
		0.00224	-1.39777e-10	-1.09825e-10	-1.22929e-10
		0.00226	-1.41025e-10	-1.08577e-10	-1.21681e-10
		0.00228	-1.42273e-10	-1.09825e-10	-1.21057e-10
		0.0023	-1.40401e-10	-1.08577e-10	-1.19809e-10
		0.00232	-1.42897e-10	-1.07953e-10	-1.18561e-10
		0.00234	-1.41025e-10	-1.06705e-10	-1.19809e-10
		0.00236	-1.37281e-10	-1.05457e-10	-1.20433e-10
		0.00238	-1.36033e-10	-1.05457e-10	-1.22305e-10
		0.0024	-1.34785e-10	-1.04209e-10	-1.24801e-10
		0.00242	-1.35409e-10	-1.06081e-10	-1.25425e-10
		0.00244	-1.36033e-10	-1.06705e-10	-1.24177e-10
		0.00246	-1.37281e-10	-1.08577e-10	-1.22929e-10
		0.00248	-1.36657e-10	-1.10449e-10	-1.22929e-10
		0.0025	-1.37281e-10	-1.10449e-10	-1.22929e-10
		0.00252	-1.36033e-10	-1.08577e-10	-1.24801e-10
		0.00254	-1.37281e-10	-1.07953e-10	-1.22929e-10
		0.00256	-1.34161e-10	-1.06081e-10	-1.21057e-10
		0.00258	-1.33537e-10	-1.04833e-10	-1.20433e-10
		0.0026	-1.33537e-10	-1.05457e-10	-1.17937e-10
		0.00262	-1.34785e-10	-1.07953e-10	-1.16689e-10
		0.00264	-1.35409e-10	-1.08577e-10	-1.17313e-10
		0.00266	-1.36033e-10	-1.09201e-10	-1.19809e-10
		0.00268	-1.38529e-10	-1.07953e-10	-1.18561e-10
		0.0027	-1.39777e-10	-1.06705e-10	-1.22305e-10
		0.00272	-1.40401e-10	-1.04833e-10	-1.22305e-10
		0.00274	-1.39777e-10	-1.04209e-10	-1.22305e-10
		0.00276	-1.40401e-10	-1.04833e-10	-1.21057e-10
		0.00278	-1.41025e-10	-1.05457e-10	-1.21057e-10
		0.0028	-1.40401e-10	-1.08577e-10	-1.20433e-10
		0.00282	-1.37905e-10	-1.09201e-10	-1.21057e-10
		0.00284	-1.36033e-10	-1.09201e-10	-1.20433e-10
		0.00286	-1.34161e-10	-1.08577e-10	-1.18561e-10
		0.00288	-1.36033e-10	-1.10449e-10	-1.17937e-10
		0.0029	-1.35409e-10	-1.08577e-10	-1.17313e-10
		0.00292	-1.36657e-10	-1.07953e-10	-1.16689e-10
		0.00294	-1.36657e-10	-1.06705e-10	-1.16689e-10
		0.00296	-1.38529e-10	-1.06705e-10	-1.17313e-10
		0.00298	-1.38529e-10	-1.07329e-10	-1.17313e-10
		0.003	-1.41025e-10	-1.06705e-10	-1.17937e-10
		0.00302	-1.40401e-10	-1.04833e-10	-1.20433e-10
		0.00304	-1.41025e-10	-1.03585e-10	-1.20433e-10
		0.00306	-1.41649e-10	-1.02337e-10	-1.21057e-10
		0.00308	-1.40401e-10	-1.02337e-10	-1.21057e-10
		0.0031	-1.39777e-10	-1.02961e-10	-1.22305e-10
		0.00312	-1.39777e-10	-1.02961e-10	-1.24801e-10
		0.00314	-1.39777e-10	-1.01713e-10	-1.22305e-10
		0.00316	-1.37905e-10	-1.01089e-10	-1.21681e-10
		0.00318	-1.36033e-10	-1.00465e-10	-1.19809e-10
		0.0032	-1.36033e-10	-9.67209e-11	-1.19809e-10
		0.00322	-1.37281e-10	-9.79689e-11	-1.19185e-10
		0.00324	-1.39153e-10	-1.01089e-10	-1.21681e-10
		0.00326	-1.42273e-10	-1.04833e-10	-1.26673e-10
		0.00328	-1.46017e-10	-1.11073e-10	-1.32913e-10
		0.0033	-1.52881e-10	-1.18561e-10	-1.39153e-10
		0.00332	-1.58497e-10	-1.26049e-10	-1.45393e-10
		0.00334	-1.64114e-10	-1.35409e-10	-1.51633e-10
		0.00336	-1.67234e-10	-1.41649e-10	-1.57249e-10
		0.00338	-1.73474e-10	-1.48513e-10	-1.6349e-10
		0.0034	-1.7597e-10	-1.52257e-10	-1.68482e-10
		0.00342	-1.78466e-10	-1.56001e-10	-1.7285e-10
		0.00344	-1.80338e-10	-1.59745e-10	-1.76594e-10
		0.00346	-1.80962e-10	-1.62242e-10	-1.78466e-10
		0.00348	-1.8221e-10	-1.65986e-10	-1.79714e-10
		0.0035	-1.82834e-10	-1.67234e-10	-1.79714e-10
		0.00352	-1.8221e-10	-1.70354e-10	-1.7909e-10
		0.00354	-1.8221e-10	-1.70354e-10	-1.7909e-10
		0.00356	-1.82834e-10	-1.71602e-10	-1.7909e-10
		0.00358	-1.81586e-10	-1.72226e-10	-1.79714e-10
		0.0036	-1.82834e-10	-1.72226e-10	-1.79714e-10
		0.00362	-1.80962e-10	-1.73474e-10	-1.80338e-10
		0.00364	-1.80338e-10	-1.73474e-10	-1.81586e-10
		0.00366	-1.79714e-10	-1.71602e-10	-1.81586e-10
		0.00368	-1.80338e-10	-1.72226e-10	-1.80338e-10
		0.0037	-1.78466e-10	-1.70978e-10	-1.7909e-10
		0.00372	-1.78466e-10	-1.69106e-10	-1.7597e-10
		0.00374	-1.78466e-10	-1.69106e-10	-1.74722e-10
		0.00376	-1.77842e-10	-1.68482e-10	-1.71602e-10
		0.00378	-1.78466e-10	-1.64738e-10	-1.69106e-10
		0.0038	-1.77218e-10	-1.65986e-10	-1.67234e-10
		0.00382	-1.77218e-10	-1.6661e-10	-1.65362e-10
		0.00384	-1.7597e-10	-1.6661e-10	-1.64114e-10
		0.00386	-1.76594e-10	-1.65986e-10	-1.62866e-10
		0.00388	-1.74722e-10	-1.65362e-10	-1.62866e-10
		0.0039	-1.74098e-10	-1.65362e-10	-1.6349e-10
		0.00392	-1.74098e-10	-1.65362e-10	-1.64738e-10
		0.00394	-1.74098e-10	-1.6349e-10	-1.65986e-10
		0.00396	-1.77842e-10	-1.64114e-10	-1.64738e-10
		0.00398	-1.80962e-10	-1.62242e-10	-1.62866e-10
		0.004	-1.87826e-10	-1.62242e-10	-1.62242e-10
		0.00402	-1.9781e-10	-1.60369e-10	-1.61618e-10
		0.00404	-2.06546e-10	-1.57873e-10	-1.62242e-10
		0.00406	-2.15906e-10	-1.57249e-10	-1.62242e-10
		0.00408	-2.20898e-10	-1.56001e-10	-1.64114e-10
		0.0041	-2.2901e-10	-1.56001e-10	-1.62866e-10
		0.00412	-2.30882e-10	-1.55377e-10	-1.64114e-10
		0.00414	-2.33378e-10	-1.55377e-10	-1.61618e-10
		0.00416	-2.31506e-10	-1.56001e-10	-1.60369e-10
		0.00418	-2.2901e-10	-1.55377e-10	-1.58497e-10
		0.0042	-2.25266e-10	-1.56625e-10	-1.56625e-10
		0.00422	-2.1965e-10	-1.56001e-10	-1.54753e-10
		0.00424	-2.15906e-10	-1.56625e-10	-1.54753e-10
		0.00426	-2.10914e-10	-1.57249e-10	-1.54129e-10
		0.00428	-2.08418e-10	-1.57249e-10	-1.54129e-10
		0.0043	-2.01554e-10	-1.55377e-10	-1.53505e-10
		0.00432	-1.9781e-10	-1.54753e-10	-1.52257e-10
		0.00434	-1.93442e-10	-1.55377e-10	-1.53505e-10
		0.00436	-1.90322e-10	-1.54753e-10	-1.54129e-10
		0.00438	-1.85954e-10	-1.55377e-10	-1.54129e-10
		0.0044	-1.8221e-10	-1.56001e-10	-1.51633e-10
		0.00442	-1.81586e-10	-1.55377e-10	-1.50385e-10
		0.00444	-1.80338e-10	-1.56001e-10	-1.49137e-10
		0.00446	-1.78466e-10	-1.57249e-10	-1.48513e-10
		0.00448	-1.77218e-10	-1.55377e-10	-1.49137e-10
		0.0045	-1.7597e-10	-1.54753e-10	-1.49761e-10
		0.00452	-1.75346e-10	-1.52257e-10	-1.51633e-10
		0.00454	-1.73474e-10	-1.49761e-10	-1.52881e-10
		0.00456	-1.7285e-10	-1.49761e-10	-1.50385e-10
		0.00458	-1.70978e-10	-1.46017e-10	-1.49137e-10
		0.0046	-1.70978e-10	-1.45393e-10	-1.49761e-10
		0.00462	-1.6973e-10	-1.44769e-10	-1.48513e-10
		0.00464	-1.6973e-10	-1.46017e-10	-1.49137e-10
		0.00466	-1.70978e-10	-1.46641e-10	-1.48513e-10
		0.00468	-1.71602e-10	-1.46641e-10	-1.49761e-10
		0.0047	-1.73474e-10	-1.47889e-10	-1.52257e-10
		0.00472	-1.73474e-10	-1.47889e-10	-1.54129e-10
		0.00474	-1.72226e-10	-1.48513e-10	-1.54129e-10
		0.00476	-1.72226e-10	-1.49137e-10	-1.53505e-10
		0.00478	-1.74098e-10	-1.46017e-10	-1.52881e-10
		0.0048	-1.73474e-10	-1.46641e-10	-1.51009e-10
		0.00482	-1.7285e-10	-1.46017e-10	-1.50385e-10
		0.00484	-1.72226e-10	-1.44145e-10	-1.49761e-10
		0.00486	-1.70354e-10	-1.44145e-10	-1.49137e-10
		0.00488	-1.69106e-10	-1.44145e-10	-1.49137e-10
		0.0049	-1.67858e-10	-1.43521e-10	-1.45393e-10
		0.00492	-1.67234e-10	-1.43521e-10	-1.44145e-10
		0.00494	-1.6661e-10	-1.44769e-10	-1.41649e-10
		0.00496	-1.68482e-10	-1.44145e-10	-1.41649e-10
		0.00498	-1.68482e-10	-1.46017e-10	-1.41025e-10
		0.005	-1.69106e-10	-1.46017e-10	-1.44145e-10
		0.00502	-1.69106e-10	-1.44145e-10	-1.44145e-10
		0.00504	-1.69106e-10	-1.44769e-10	-1.46017e-10
		0.00506	-1.67858e-10	-1.43521e-10	-1.46017e-10
		0.00508	-1.67234e-10	-1.44769e-10	-1.45393e-10
		0.0051	-1.67858e-10	-1.44145e-10	-1.46017e-10
		0.00512	-1.67858e-10	-1.44145e-10	-1.47889e-10
		0.00514	-1.6661e-10	-1.46017e-10	-1.48513e-10
		0.00516	-1.64738e-10	-1.45393e-10	-1.48513e-10
		0.00518	-1.6349e-10	-1.43521e-10	-1.49137e-10
		0.0052	-1.6349e-10	-1.44145e-10	-1.49761e-10
		0.00522	-1.62866e-10	-1.42273e-10	-1.50385e-10
		0.00524	-1.61618e-10	-1.43521e-10	-1.47889e-10
		0.00526	-1.61618e-10	-1.44769e-10	-1.46017e-10
		0.00528	-1.60993e-10	-1.43521e-10	-1.45393e-10
		0.0053	-1.61618e-10	-1.44769e-10	-1.44145e-10
		0.00532	-1.61618e-10	-1.42897e-10	-1.44145e-10
		0.00534	-1.62866e-10	-1.43521e-10	-1.43521e-10
		0.00536	-1.62242e-10	-1.43521e-10	-1.44145e-10
		0.00538	-1.62866e-10	-1.42273e-10	-1.45393e-10
		0.0054	-1.64738e-10	-1.41649e-10	-1.46641e-10
		0.00542	-1.62242e-10	-1.41025e-10	-1.46641e-10
		0.00544	-1.62242e-10	-1.44145e-10	-1.45393e-10
		0.00546	-1.6349e-10	-1.42897e-10	-1.46641e-10
		0.00548	-1.59745e-10	-1.44145e-10	-1.46017e-10
		0.0055	-1.59121e-10	-1.43521e-10	-1.46017e-10
		0.00552	-1.60369e-10	-1.42273e-10	-1.44769e-10
		0.00554	-1.59121e-10	-1.41649e-10	-1.45393e-10
		0.00556	-1.59745e-10	-1.41025e-10	-1.44769e-10
		0.00558	-1.60369e-10	-1.38529e-10	-1.42897e-10
		0.0056	-1.62242e-10	-1.38529e-10	-1.41025e-10
		0.00562	-1.62866e-10	-1.39153e-10	-1.41649e-10
		0.00564	-1.62242e-10	-1.39153e-10	-1.40401e-10
		0.00566	-1.62242e-10	-1.37281e-10	-1.41649e-10
		0.00568	-1.64114e-10	-1.37905e-10	-1.42897e-10
		0.0057	-1.62242e-10	-1.36033e-10	-1.44145e-10
		0.00572	-1.61618e-10	-1.34785e-10	-1.43521e-10
		0.00574	-1.60993e-10	-1.35409e-10	-1.43521e-10
		0.00576	-1.59121e-10	-1.36657e-10	-1.41649e-10
		0.00578	-1.57873e-10	-1.38529e-10	-1.41025e-10
		0.0058	-1.58497e-10	-1.39153e-10	-1.41025e-10
		0.00582	-1.57873e-10	-1.41649e-10	-1.43521e-10
		0.00584	-1.57249e-10	-1.41025e-10	-1.45393e-10
		0.00586	-1.58497e-10	-1.40401e-10	-1.47265e-10
		0.00588	-1.58497e-10	-1.39153e-10	-1.47889e-10
		0.0059	-1.58497e-10	-1.38529e-10	-1.48513e-10
		0.00592	-1.60369e-10	-1.40401e-10	-1.45393e-10
		0.00594	-1.60993e-10	-1.41025e-10	-1.45393e-10
		0.00596	-1.60993e-10	-1.41025e-10	-1.43521e-10
		0.00598	-1.60993e-10	-1.42273e-10	-1.42897e-10
		0.006	-1.60369e-10	-1.41649e-10	-1.43521e-10
		0.00602	-1.59745e-10	-1.43521e-10	-1.43521e-10
		0.00604	-1.58497e-10	-1.44145e-10	-1.42897e-10
		0.00606	-1.57873e-10	-1.44145e-10	-1.41025e-10
		0.00608	-1.57249e-10	-1.42273e-10	-1.39777e-10
		0.0061	-1.58497e-10	-1.41649e-10	-1.40401e-10
		0.00612	-1.58497e-10	-1.42273e-10	-1.39153e-10
		0.00614	-1.60369e-10	-1.43521e-10	-1.39777e-10
		0.00616	-1.6349e-10	-1.43521e-10	-1.41025e-10
		0.00618	-1.65362e-10	-1.44769e-10	-1.41649e-10
		0.0062	-1.64738e-10	-1.42273e-10	-1.46641e-10
		0.00622	-1.64738e-10	-1.39777e-10	-1.47889e-10
		0.00624	-1.60369e-10	-1.37905e-10	-1.46017e-10
		0.00626	-1.56625e-10	-1.33537e-10	-1.44145e-10
		0.00628	-1.50385e-10	-1.27921e-10	-1.39153e-10
		0.0063	-1.46017e-10	-1.22305e-10	-1.32289e-10
		0.00632	-1.41025e-10	-1.16689e-10	-1.23553e-10
		0.00634	-1.36033e-10	-1.09825e-10	-1.16065e-10
		0.00636	-1.31041e-10	-1.02337e-10	-1.09201e-10
		0.00638	-1.28545e-10	-9.54729e-11	-1.01089e-10
		0.0064	-1.24801e-10	-8.98568e-11	-9.54729e-11
		0.00642	-1.19809e-10	-8.48648e-11	-8.92328e-11
		0.00644	-1.16689e-10	-8.17448e-11	-8.54888e-11
		0.00646	-1.15441e-10	-7.86247e-11	-8.23688e-11
		0.00648	-1.12945e-10	-7.61287e-11	-7.98727e-11
		0.0065	-1.11073e-10	-7.23847e-11	-7.92487e-11
		0.00652	-1.13569e-10	-7.05127e-11	-8.11208e-11
		0.00654	-1.12945e-10	-6.92646e-11	-8.61128e-11
		0.00656	-1.12321e-10	-6.92646e-11	-8.61128e-11
		0.00658	-1.13569e-10	-6.92646e-11	-8.61128e-11
		0.0066	-1.12321e-10	-6.80166e-11	-8.73608e-11
		0.00662	-1.14817e-10	-7.11367e-11	-8.73608e-11
		0.00664	-1.14817e-10	-6.92646e-11	-8.86088e-11
		0.00666	-1.14817e-10	-7.05127e-11	-8.92328e-11
		0.00668	-1.13569e-10	-7.05127e-11	-8.98568e-11
		0.0067	-1.11697e-10	-6.86406e-11	-8.98568e-11
		0.00672	-1.13569e-10	-6.86406e-11	-8.98568e-11
		0.00674	-1.14193e-10	-6.80166e-11	-9.04808e-11
		0.00676	-1.14817e-10	-6.80166e-11	-8.98568e-11
		0.00678	-1.16065e-10	-6.98887e-11	-9.11049e-11
		0.0068	-1.16689e-10	-7.11367e-11	-9.11049e-11
		0.00682	-1.17313e-10	-7.23847e-11	-9.17289e-11
		0.00684	-1.16689e-10	-7.48807e-11	-8.98568e-11
		0.00686	-1.17313e-10	-7.55047e-11	-9.11049e-11
		0.00688	-1.17937e-10	-7.61287e-11	-9.23529e-11
		0.0069	-1.17313e-10	-7.55047e-11	-9.17289e-11
		0.00692	-1.19185e-10	-7.48807e-11	-9.42249e-11
		0.00694	-1.20433e-10	-7.67527e-11	-9.42249e-11
		0.00696	-1.19809e-10	-7.67527e-11	-9.54729e-11
		0.00698	-1.21057e-10	-7.61287e-11	-9.67209e-11
		0.007	-1.23553e-10	-7.73767e-11	-9.73449e-11
		0.00702	-1.24177e-10	-7.73767e-11	-9.98409e-11
		0.00704	-1.25425e-10	-7.98727e-11	-9.92169e-11
		0.00706	-1.27921e-10	-7.86247e-11	-9.92169e-11
		0.00708	-1.28545e-10	-7.98727e-11	-9.92169e-11
		0.0071	-1.29793e-10	-8.04967e-11	-1.00465e-10
		0.00712	-1.29169e-10	-7.98727e-11	-1.01713e-10
		0.00714	-1.28545e-10	-8.17448e-11	-1.03585e-10
		0.00716	-1.27297e-10	-8.23688e-11	-1.07329e-10
		0.00718	-1.26673e-10	-8.36168e-11	-1.08577e-10
		0.0072	-1.25425e-10	-8.54888e-11	-1.08577e-10
		0.00722	-1.27297e-10	-8.67368e-11	-1.09825e-10
		0.00724	-1.27297e-10	-8.73608e-11	-1.10449e-10
		0.00726	-1.27297e-10	-8.92328e-11	-1.09825e-10
		0.00728	-1.27921e-10	-8.92328e-11	-1.09201e-10
		0.0073	-1.28545e-10	-9.04808e-11	-1.08577e-10
		0.00732	-1.28545e-10	-9.04808e-11	-1.07953e-10
		0.00734	-1.26673e-10	-9.04808e-11	-1.07329e-10
		0.00736	-1.27921e-10	-8.98568e-11	-1.07329e-10
		0.00738	-1.26673e-10	-9.04808e-11	-1.07953e-10
		0.0074	-1.27297e-10	-8.92328e-11	-1.08577e-10
		0.00742	-1.27297e-10	-8.79848e-11	-1.09201e-10
		0.00744	-1.27297e-10	-8.86088e-11	-1.11073e-10
		0.00746	-1.27921e-10	-8.86088e-11	-1.11697e-10
		0.00748	-1.26673e-10	-8.79848e-11	-1.12321e-10
		0.0075	-1.28545e-10	-8.98568e-11	-1.14193e-10
		0.00752	-1.31041e-10	-9.11049e-11	-1.16689e-10
		0.00754	-1.31665e-10	-9.11049e-11	-1.17313e-10
		0.00756	-1.32289e-10	-9.42249e-11	-1.17313e-10
		0.00758	-1.34161e-10	-9.54729e-11	-1.17313e-10
		0.0076	-1.32913e-10	-9.48489e-11	-1.15441e-10
		0.00762	-1.32289e-10	-9.54729e-11	-1.12945e-10
		0.00764	-1.31041e-10	-9.54729e-11	-1.11073e-10
		0.00766	-1.29793e-10	-9.48489e-11	-1.09201e-10
		0.00768	-1.27921e-10	-9.23529e-11	-1.09201e-10
		0.0077	-1.27297e-10	-9.23529e-11	-1.09201e-10
		0.00772	-1.26049e-10	-9.17289e-11	-1.07953e-10
		0.00774	-1.26673e-10	-9.17289e-11	-1.10449e-10
		0.00776	-1.27297e-10	-8.92328e-11	-1.09825e-10
		0.00778	-1.27297e-10	-8.98568e-11	-1.12321e-10
		0.0078	-1.30417e-10	-8.92328e-11	-1.11697e-10
		0.00782	-1.30417e-10	-8.79848e-11	-1.12321e-10
		0.00784	-1.31041e-10	-8.92328e-11	-1.12321e-10
		0.00786	-1.29169e-10	-8.98568e-11	-1.11697e-10
		0.00788	-1.27297e-10	-9.04808e-11	-1.12945e-10
		0.0079	-1.26673e-10	-9.11049e-11	-1.13569e-10
		0.00792	-1.27297e-10	-9.11049e-11	-1.14193e-10
		0.00794	-1.27297e-10	-9.04808e-11	-1.17313e-10
		0.00796	-1.27921e-10	-9.17289e-11	-1.18561e-10
		0.00798	-1.28545e-10	-9.17289e-11	-1.19185e-10
		0.008	-1.27297e-10	-9.17289e-11	-1.20433e-10
		0.00802	-1.30417e-10	-9.29769e-11	-1.21057e-10
		0.00804	-1.31665e-10	-9.29769e-11	-1.20433e-10
		0.00806	-1.34785e-10	-9.48489e-11	-1.20433e-10
		0.00808	-1.36657e-10	-9.42249e-11	-1.18561e-10
		0.0081	-1.37281e-10	-9.60969e-11	-1.16689e-10
		0.00812	-1.38529e-10	-9.60969e-11	-1.16065e-10
		0.00814	-1.39153e-10	-9.73449e-11	-1.14193e-10
		0.00816	-1.36657e-10	-9.73449e-11	-1.15441e-10
		0.00818	-1.36033e-10	-9.67209e-11	-1.15441e-10
		0.0082	-1.36033e-10	-9.60969e-11	-1.15441e-10
		0.00822	-1.35409e-10	-9.48489e-11	-1.16689e-10
		0.00824	-1.34785e-10	-9.48489e-11	-1.18561e-10
		0.00826	-1.35409e-10	-9.48489e-11	-1.17937e-10
		0.00828	-1.35409e-10	-9.60969e-11	-1.17937e-10
		0.0083	-1.34161e-10	-9.67209e-11	-1.16689e-10
		0.00832	-1.32289e-10	-9.73449e-11	-1.16689e-10
		0.00834	-1.32913e-10	-9.73449e-11	-1.16065e-10
		0.00836	-1.30417e-10	-9.79689e-11	-1.16065e-10
		0.00838	-1.30417e-10	-9.54729e-11	-1.16689e-10
		0.0084	-1.31041e-10	-9.48489e-11	-1.15441e-10
		0.00842	-1.32913e-10	-9.54729e-11	-1.16065e-10
		0.00844	-1.32913e-10	-9.42249e-11	-1.15441e-10
		0.00846	-1.32289e-10	-9.36009e-11	-1.16689e-10
		0.00848	-1.32913e-10	-9.48489e-11	-1.19185e-10
		0.0085	-1.31665e-10	-9.73449e-11	-1.20433e-10
		0.00852	-1.31041e-10	-9.79689e-11	-1.21057e-10
		0.00854	-1.30417e-10	-9.85929e-11	-1.22929e-10
		0.00856	-1.31041e-10	-9.85929e-11	-1.22929e-10
		0.00858	-1.35409e-10	-9.98409e-11	-1.22305e-10
		0.0086	-1.36657e-10	-9.85929e-11	-1.20433e-10
		0.00862	-1.36033e-10	-9.85929e-11	-1.19185e-10
		0.00864	-1.35409e-10	-9.92169e-11	-1.19185e-10
		0.00866	-1.32913e-10	-9.73449e-11	-1.17937e-10
		0.00868	-1.34161e-10	-9.79689e-11	-1.17313e-10
		0.0087	-1.35409e-10	-9.79689e-11	-1.16689e-10
		0.00872	-1.36033e-10	-9.73449e-11	-1.15441e-10
		0.00874	-1.36657e-10	-9.60969e-11	-1.16065e-10
		0.00876	-1.37281e-10	-9.79689e-11	-1.17313e-10
		0.00878	-1.36657e-10	-9.92169e-11	-1.16065e-10
		0.0088	-1.34785e-10	-9.98409e-11	-1.15441e-10
		0.00882	-1.33537e-10	-9.92169e-11	-1.14817e-10
		0.00884	-1.34161e-10	-9.92169e-11	-1.17313e-10
		0.00886	-1.32289e-10	-9.85929e-11	-1.19185e-10
		0.00888	-1.32913e-10	-9.85929e-11	-1.19809e-10
		0.0089	-1.35409e-10	-9.67209e-11	-1.20433e-10
		0.00892	-1.35409e-10	-9.73449e-11	-1.19185e-10
		0.00894	-1.36033e-10	-9.79689e-11	-1.16689e-10
		0.00896	-1.34785e-10	-9.79689e-11	-1.16065e-10
		0.00898	-1.34161e-10	-1.01089e-10	-1.14193e-10
		0.009	-1.33537e-10	-1.01713e-10	-1.11697e-10
		0.00902	-1.34161e-10	-1.02961e-10	-1.12321e-10
		0.00904	-1.34161e-10	-1.02337e-10	-1.14193e-10
		0.00906	-1.34785e-10	-1.01089e-10	-1.15441e-10
		0.00908	-1.37905e-10	-9.92169e-11	-1.16689e-10
		0.0091	-1.40401e-10	-9.98409e-11	-1.17313e-10
		0.00912	-1.41025e-10	-9.98409e-11	-1.18561e-10
		0.00914	-1.42273e-10	-9.73449e-11	-1.17937e-10
		0.00916	-1.42897e-10	-9.98409e-11	-1.19809e-10
		0.00918	-1.39777e-10	-9.92169e-11	-1.19185e-10
		0.0092	-1.37905e-10	-9.92169e-11	-1.21057e-10
		0.00922	-1.36033e-10	-1.01089e-10	-1.21681e-10
		0.00924	-1.34161e-10	-1.01089e-10	-1.22305e-10
		0.00926	-1.35409e-10	-1.02337e-10	-1.20433e-10
		0.00928	-1.35409e-10	-1.04209e-10	-1.21057e-10
		0.0093	-1.35409e-10	-1.03585e-10	-1.21057e-10
		0.00932	-1.36033e-10	-1.04209e-10	-1.19185e-10
		0.00934	-1.36033e-10	-1.03585e-10	-1.18561e-10
		0.00936	-1.35409e-10	-1.01713e-10	-1.19185e-10
		0.00938	-1.34161e-10	-1.00465e-10	-1.17937e-10
		0.0094	-1.34785e-10	-9.92169e-11	-1.17937e-10
		0.00942	-1.34785e-10	-9.98409e-11	-1.16689e-10
		0.00944	-1.34161e-10	-1.01089e-10	-1.17937e-10
		0.00946	-1.34785e-10	-1.00465e-10	-1.17313e-10
		0.00948	-1.36033e-10	-1.01089e-10	-1.19185e-10
		0.0095	-1.35409e-10	-1.00465e-10	-1.18561e-10
		0.00952	-1.34785e-10	-9.85929e-11	-1.19185e-10
		0.00954	-1.36033e-10	-9.92169e-11	-1.19185e-10
		0.00956	-1.35409e-10	-9.92169e-11	-1.20433e-10
		0.00958	-1.38529e-10	-1.01713e-10	-1.19185e-10
		0.0096	-1.38529e-10	-1.01713e-10	-1.21681e-10
		0.00962	-1.39153e-10	-1.04209e-10	-1.22305e-10
		0.00964	-1.37281e-10	-1.05457e-10	-1.22929e-10
		0.00966	-1.36657e-10	-1.06081e-10	-1.23553e-10
		0.00968	-1.35409e-10	-1.05457e-10	-1.24177e-10
		0.0097	-1.34161e-10	-1.04833e-10	-1.24177e-10
		0.00972	-1.31665e-10	-1.05457e-10	-1.24177e-10
		0.00974	-1.32913e-10	-1.03585e-10	-1.23553e-10
		0.00976	-1.34785e-10	-1.04833e-10	-1.22305e-10
		0.00978	-1.36033e-10	-1.06081e-10	-1.23553e-10
		0.0098	-1.36657e-10	-1.04833e-10	-1.21681e-10
		0.00982	-1.40401e-10	-1.05457e-10	-1.21057e-10
		0.00984	-1.41025e-10	-1.06081e-10	-1.22305e-10
		0.00986	-1.39153e-10	-1.04833e-10	-1.22929e-10
		0.00988	-1.39153e-10	-1.04833e-10	-1.22305e-10
		0.0099	-1.37905e-10	-1.03585e-10	-1.19809e-10
		0.00992	-1.38529e-10	-1.02337e-10	-1.21057e-10
		0.00994	-1.39153e-10	-1.04209e-10	-1.19809e-10
		0.00996	-1.38529e-10	-1.03585e-10	-1.19809e-10
		0.00998	-1.38529e-10	-1.02337e-10	-1.19185e-10
		0.01	-1.36033e-10	-1.04209e-10	-1.18561e-10
		0.01002	-1.34785e-10	-1.04209e-10	-1.19809e-10
		0.01004	-1.35409e-10	-1.04209e-10	-1.19185e-10
		0.01006	-1.36657e-10	-1.04833e-10	-1.19185e-10
		0.01008	-1.36657e-10	-1.04833e-10	-1.17313e-10
		0.0101	-1.37281e-10	-1.04209e-10	-1.17313e-10
		0.01012	-1.39777e-10	-1.02961e-10	-1.17313e-10
		0.01014	-1.39777e-10	-1.03585e-10	-1.16689e-10
		0.01016	-1.37905e-10	-1.01713e-10	-1.17937e-10
		0.01018	-1.38529e-10	-1.00465e-10	-1.21057e-10
		0.0102	-1.38529e-10	-1.00465e-10	-1.23553e-10
		0.01022	-1.38529e-10	-9.73449e-11	-1.24177e-10
		0.01024	-1.36657e-10	-9.92169e-11	-1.24177e-10
		0.01026	-1.37905e-10	-1.00465e-10	-1.22929e-10
		0.01028	-1.36033e-10	-1.01089e-10	-1.21681e-10
		0.0103	-1.36033e-10	-1.02961e-10	-1.21681e-10
		0.01032	-1.35409e-10	-1.03585e-10	-1.20433e-10
		0.01034	-1.34785e-10	-1.04209e-10	-1.23553e-10
		0.01036	-1.32913e-10	-1.05457e-10	-1.24177e-10
		0.01038	-1.31665e-10	-1.06081e-10	-1.23553e-10
		0.0104	-1.32289e-10	-1.05457e-10	-1.23553e-10
		0.01042	-1.31665e-10	-1.06081e-10	-1.19809e-10
		0.01044	-1.32289e-10	-1.04833e-10	-1.17313e-10
		0.01046	-1.34161e-10	-1.06081e-10	-1.16065e-10
		0.01048	-1.35409e-10	-1.07953e-10	-1.17313e-10
		0.0105	-1.34785e-10	-1.06705e-10	-1.17937e-10
		0.01052	-1.32289e-10	-1.06705e-10	-1.19185e-10
		0.01054	-1.30417e-10	-1.04833e-10	-1.20433e-10
		0.01056	-1.29793e-10	-1.04209e-10	-1.21057e-10
		0.01058	-1.29169e-10	-1.02337e-10	-1.22305e-10
		0.0106	-1.28545e-10	-1.02337e-10	-1.21681e-10
		0.01062	-1.31041e-10	-1.01713e-10	-1.22929e-10
		0.01064	-1.31041e-10	-1.04209e-10	-1.24177e-10
		0.01066	-1.30417e-10	-1.04209e-10	-1.26673e-10
		0.01068	-1.32289e-10	-1.06705e-10	-1.26049e-10
		0.0107	-1.33537e-10	-1.07953e-10	-1.27921e-10
		0.01072	-1.32913e-10	-1.06081e-10	-1.26049e-10
		0.01074	-1.33537e-10	-1.07329e-10	-1.24177e-10
		0.01076	-1.35409e-10	-1.06705e-10	-1.19185e-10
		0.01078	-1.36033e-10	-1.05457e-10	-1.17937e-10
		0.0108	-1.37905e-10	-1.05457e-10	-1.16065e-10
		0.01082	-1.39777e-10	-1.05457e-10	-1.16689e-10
		0.01084	-1.38529e-10	-1.03585e-10	-1.18561e-10
		0.01086	-1.38529e-10	-1.01713e-10	-1.19809e-10
		0.01088	-1.37905e-10	-1.01713e-10	-1.21681e-10
		0.0109	-1.38529e-10	-9.92169e-11	-1.22305e-10
		0.01092	-1.39777e-10	-1.00465e-10	-1.21057e-10
		0.01094	-1.39777e-10	-9.98409e-11	-1.20433e-10
		0.01096	-1.39153e-10	-9.98409e-11	-1.19185e-10
		0.01098	-1.36657e-10	-1.01713e-10	-1.19809e-10
		0.011	-1.36657e-10	-1.02337e-10	-1.20433e-10
		0.01102	-1.33537e-10	-1.04833e-10	-1.20433e-10
		0.01104	-1.33537e-10	-1.05457e-10	-1.21681e-10
		0.01106	-1.32289e-10	-1.07953e-10	-1.21681e-10
		0.01108	-1.34161e-10	-1.07953e-10	-1.21681e-10
		0.0111	-1.35409e-10	-1.07953e-10	-1.22305e-10
		0.01112	-1.33537e-10	-1.07329e-10	-1.20433e-10
		0.01114	-1.34161e-10	-1.07953e-10	-1.20433e-10
		0.01116	-1.32913e-10	-1.04209e-10	-1.19185e-10
		0.01118	-1.32913e-10	-1.01713e-10	-1.19185e-10
		0.0112	-1.33537e-10	-9.85929e-11	-1.19809e-10
		0.01122	-1.31665e-10	-9.73449e-11	-1.21681e-10
		0.01124	-1.32913e-10	-9.73449e-11	-1.22305e-10
		0.01126	-1.34785e-10	-9.98409e-11	-1.22929e-10
		0.01128	-1.34785e-10	-9.85929e-11	-1.23553e-10
		0.0113	-1.35409e-10	-9.98409e-11	-1.24177e-10
		0.01132	-1.35409e-10	-1.02961e-10	-1.26673e-10
		0.01134	-1.35409e-10	-1.04833e-10	-1.25425e-10
		0.01136	-1.36657e-10	-1.06705e-10	-1.26049e-10
		0.01138	-1.35409e-10	-1.07953e-10	-1.24801e-10
		0.0114	-1.36657e-10	-1.09201e-10	-1.25425e-10
		0.01142	-1.36657e-10	-1.08577e-10	-1.25425e-10
		0.01144	-1.37905e-10	-1.09825e-10	-1.24177e-10
		0.01146	-1.38529e-10	-1.08577e-10	-1.21681e-10
		0.01148	-1.38529e-10	-1.07329e-10	-1.18561e-10
		0.0115	-1.37281e-10	-1.05457e-10	-1.18561e-10
		0.01152	-1.38529e-10	-1.04209e-10	-1.19185e-10
		0.01154	-1.36657e-10	-1.02961e-10	-1.19809e-10
		0.01156	-1.37905e-10	-1.02337e-10	-1.19809e-10
		0.01158	-1.38529e-10	-1.03585e-10	-1.20433e-10
		0.0116	-1.38529e-10	-1.02337e-10	-1.20433e-10
		0.01162	-1.37905e-10	-1.03585e-10	-1.21057e-10
		0.01164	-1.37281e-10	-1.04209e-10	-1.21681e-10
		0.01166	-1.34785e-10	-1.01089e-10	-1.22305e-10
		0.01168	-1.34161e-10	-1.02337e-10	-1.25425e-10
		0.0117	-1.34161e-10	-1.00465e-10	-1.23553e-10
		0.01172	-1.34161e-10	-1.01713e-10	-1.24177e-10
		0.01174	-1.36033e-10	-1.03585e-10	-1.21057e-10
		0.01176	-1.36033e-10	-1.04209e-10	-1.21057e-10
		0.01178	-1.35409e-10	-1.04209e-10	-1.20433e-10
		0.0118	-1.36033e-10	-1.06081e-10	-1.19185e-10
		0.01182	-1.35409e-10	-1.06705e-10	-1.21057e-10
		0.01184	-1.36033e-10	-1.05457e-10	-1.21681e-10
		0.01186	-1.34785e-10	-1.04833e-10	-1.22305e-10
		0.01188	-1.35409e-10	-1.05457e-10	-1.23553e-10
		0.0119	-1.36657e-10	-1.02961e-10	-1.24801e-10
		0.01192	-1.37281e-10	-1.03585e-10	-1.24801e-10
		0.01194	-1.38529e-10	-1.03585e-10	-1.23553e-10
		0.01196	-1.39153e-10	-1.05457e-10	-1.21681e-10
		0.01198	-1.39777e-10	-1.07329e-10	-1.22305e-10
		0.012	-1.40401e-10	-1.06705e-10	-1.21057e-10
		0.01202	-1.37905e-10	-1.06081e-10	-1.22929e-10
		0.01204	-1.38529e-10	-1.04833e-10	-1.22305e-10
		0.01206	-1.37281e-10	-1.03585e-10	-1.22929e-10
		0.01208	-1.37905e-10	-1.02961e-10	-1.22305e-10
		0.0121	-1.39153e-10	-1.02337e-10	-1.22305e-10
		0.01212	-1.41025e-10	-1.02961e-10	-1.22929e-10
		0.01214	-1.41649e-10	-1.02961e-10	-1.23553e-10
		0.01216	-1.42897e-10	-1.04209e-10	-1.23553e-10
		0.01218	-1.41025e-10	-1.05457e-10	-1.24177e-10
		0.0122	-1.38529e-10	-1.05457e-10	-1.26049e-10
		0.01222	-1.39777e-10	-1.06081e-10	-1.24801e-10
		0.01224	-1.39777e-10	-1.07329e-10	-1.25425e-10
		0.01226	-1.39777e-10	-1.04833e-10	-1.25425e-10
		0.01228	-1.39153e-10	-1.05457e-10	-1.25425e-10
		0.0123	-1.37905e-10	-1.04833e-10	-1.23553e-10
		0.01232	-1.37281e-10	-1.04833e-10	-1.24801e-10
		0.01234	-1.37281e-10	-1.05457e-10	-1.24801e-10
		0.01236	-1.36033e-10	-1.04833e-10	-1.25425e-10
		0.01238	-1.34161e-10	-1.04209e-10	-1.25425e-10
		0.0124	-1.34785e-10	-1.04833e-10	-1.26049e-10
		0.01242	-1.34785e-10	-1.02961e-10	-1.24177e-10
		0.01244	-1.34785e-10	-1.04209e-10	-1.23553e-10
		0.01246	-1.35409e-10	-1.03585e-10	-1.22305e-10
		0.01248	-1.36657e-10	-1.05457e-10	-1.21057e-10
		0.0125	-1.35409e-10	-1.06705e-10	-1.19809e-10
		0.01252	-1.35409e-10	-1.06081e-10	-1.20433e-10
		0.01254	-1.35409e-10	-1.06081e-10	-1.21681e-10
		0.01256	-1.37905e-10	-1.04209e-10	-1.17937e-10
		0.01258	-1.39153e-10	-1.04209e-10	-1.16689e-10
		0.0126	-1.41025e-10	-1.03585e-10	-1.14817e-10
		0.01262	-1.42273e-10	-1.04209e-10	-1.13569e-10
		0.01264	-1.42897e-10	-1.04833e-10	-1.17313e-10
		0.01266	-1.42273e-10	-1.04209e-10	-1.19185e-10
		0.01268	-1.41025e-10	-1.04209e-10	-1.21057e-10
		0.0127	-1.38529e-10	-1.04833e-10	-1.22929e-10
		0.01272	-1.35409e-10	-1.03585e-10	-1.25425e-10
		0.01274	-1.34785e-10	-1.01713e-10	-1.25425e-10
		0.01276	-1.34161e-10	-1.03585e-10	-1.23553e-10
		0.01278	-1.37281e-10	-1.04209e-10	-1.21681e-10
		0.0128	-1.37281e-10	-1.05457e-10	-1.22929e-10
		0.01282	-1.39153e-10	-1.07329e-10	-1.21057e-10
		0.01284	-1.39153e-10	-1.07329e-10	-1.22305e-10
		0.01286	-1.39153e-10	-1.09201e-10	-1.22305e-10
		0.01288	-1.41025e-10	-1.07329e-10	-1.24177e-10
		0.0129	-1.38529e-10	-1.09201e-10	-1.21057e-10
		0.01292	-1.39153e-10	-1.09825e-10	-1.18561e-10
		0.01294	-1.41025e-10	-1.09201e-10	-1.17937e-10
		0.01296	-1.41649e-10	-1.08577e-10	-1.17313e-10
		0.01298	-1.40401e-10	-1.07953e-10	-1.17313e-10
		0.013	-1.40401e-10	-1.06081e-10	-1.17937e-10
		0.01302	-1.39153e-10	-1.04209e-10	-1.20433e-10
		0.01304	-1.37905e-10	-1.02961e-10	-1.23553e-10
		0.01306	-1.37905e-10	-1.04209e-10	-1.26049e-10
		0.01308	-1.37281e-10	-1.04209e-10	-1.28545e-10
		0.0131	-1.37281e-10	-1.05457e-10	-1.30417e-10
		0.01312	-1.37905e-10	-1.04209e-10	-1.31041e-10
		0.01314	-1.37281e-10	-1.04209e-10	-1.31041e-10
		0.01316	-1.36657e-10	-1.02961e-10	-1.28545e-10
		0.01318	-1.36657e-10	-1.02337e-10	-1.25425e-10
		0.0132	-1.38529e-10	-1.02961e-10	-1.25425e-10
		0.01322	-1.39153e-10	-1.01713e-10	-1.22305e-10
		0.01324	-1.41649e-10	-1.04209e-10	-1.20433e-10
		0.01326	-1.41025e-10	-1.04209e-10	-1.19185e-10
		0.01328	-1.42273e-10	-1.03585e-10	-1.18561e-10
		0.0133	-1.41025e-10	-1.05457e-10	-1.17937e-10
		0.01332	-1.41649e-10	-1.04833e-10	-1.19185e-10
		0.01334	-1.41025e-10	-1.06081e-10	-1.19809e-10
		0.01336	-1.38529e-10	-1.05457e-10	-1.19185e-10
		0.01338	-1.37281e-10	-1.06081e-10	-1.19809e-10
		0.0134	-1.36657e-10	-1.05457e-10	-1.20433e-10
		0.01342	-1.35409e-10	-1.04833e-10	-1.19185e-10
		0.01344	-1.36033e-10	-1.05457e-10	-1.18561e-10
		0.01346	-1.35409e-10	-1.06081e-10	-1.17937e-10
		0.01348	-1.36033e-10	-1.07329e-10	-1.17313e-10
		0.0135	-1.36657e-10	-1.05457e-10	-1.19809e-10
		0.01352	-1.37281e-10	-1.04209e-10	-1.20433e-10
		0.01354	-1.36657e-10	-1.03585e-10	-1.21681e-10
		0.01356	-1.36657e-10	-1.01713e-10	-1.24177e-10
		0.01358	-1.35409e-10	-1.00465e-10	-1.23553e-10
		0.0136	-1.35409e-10	-9.98409e-11	-1.23553e-10
		0.01362	-1.35409e-10	-1.00465e-10	-1.23553e-10
		0.01364	-1.34785e-10	-1.01089e-10	-1.22929e-10
		0.01366	-1.34785e-10	-1.02337e-10	-1.22305e-10
		0.01368	-1.35409e-10	-9.98409e-11	-1.22305e-10
		0.0137	-1.36033e-10	-1.00465e-10	-1.24177e-10
		0.01372	-1.34785e-10	-9.98409e-11	-1.25425e-10
		0.01374	-1.36033e-10	-1.01713e-10	-1.24801e-10
		0.01376	-1.37281e-10	-1.02337e-10	-1.26049e-10
		0.01378	-1.38529e-10	-1.04209e-10	-1.25425e-10
		0.0138	-1.39777e-10	-1.04833e-10	-1.25425e-10
		0.01382	-1.39153e-10	-1.06081e-10	-1.24177e-10
		0.01384	-1.39153e-10	-1.06081e-10	-1.23553e-10
		0.01386	-1.37905e-10	-1.06705e-10	-1.24801e-10
		0.01388	-1.37281e-10	-1.07329e-10	-1.26673e-10
		0.0139	-1.35409e-10	-1.05457e-10	-1.25425e-10
		0.01392	-1.34785e-10	-1.06081e-10	-1.24177e-10
		0.01394	-1.35409e-10	-1.04833e-10	-1.24801e-10
		0.01396	-1.34785e-10	-1.04833e-10	-1.23553e-10
		0.01398	-1.36657e-10	-1.06081e-10	-1.23553e-10
		0.014	-1.37281e-10	-1.05457e-10	-1.21681e-10
		0.01402	-1.37905e-10	-1.06081e-10	-1.21681e-10
		0.01404	-1.39153e-10	-1.07953e-10	-1.23553e-10
		0.01406	-1.40401e-10	-1.08577e-10	-1.24801e-10
		0.01408	-1.40401e-10	-1.09825e-10	-1.25425e-10
		0.0141	-1.40401e-10	-1.09825e-10	-1.24801e-10
		0.01412	-1.40401e-10	-1.09201e-10	-1.24177e-10
		0.01414	-1.41025e-10	-1.09825e-10	-1.24801e-10
		0.01416	-1.39777e-10	-1.09201e-10	-1.24177e-10
		0.01418	-1.37281e-10	-1.06081e-10	-1.24177e-10
		0.0142	-1.34785e-10	-1.03585e-10	-1.24177e-10
		0.01422	-1.32289e-10	-1.04209e-10	-1.24177e-10
		0.01424	-1.34161e-10	-1.02337e-10	-1.22305e-10
		0.01426	-1.36033e-10	-1.04209e-10	-1.22929e-10
		0.01428	-1.34785e-10	-1.02961e-10	-1.21057e-10
		0.0143	-1.38529e-10	-1.04209e-10	-1.22305e-10
		0.01432	-1.37281e-10	-1.02337e-10	-1.22305e-10
		0.01434	-1.36657e-10	-1.02337e-10	-1.24801e-10
		0.01436	-1.36033e-10	-1.05457e-10	-1.25425e-10
		0.01438	-1.36033e-10	-1.04209e-10	-1.27297e-10
		0.0144	-1.34785e-10	-1.04209e-10	-1.26673e-10
		0.01442	-1.36657e-10	-1.04209e-10	-1.26049e-10
		0.01444	-1.37905e-10	-1.04209e-10	-1.24801e-10
		0.01446	-1.37281e-10	-1.04833e-10	-1.23553e-10
		0.01448	-1.37281e-10	-1.06081e-10	-1.22929e-10
		0.0145	-1.36657e-10	-1.06705e-10	-1.23553e-10
		0.01452	-1.37905e-10	-1.07329e-10	-1.22929e-10
		0.01454	-1.36657e-10	-1.07329e-10	-1.22305e-10
		0.01456	-1.39153e-10	-1.08577e-10	-1.21057e-10
		0.01458	-1.39153e-10	-1.09201e-10	-1.20433e-10
		0.0146	-1.39153e-10	-1.08577e-10	-1.18561e-10
		0.01462	-1.38529e-10	-1.09201e-10	-1.19809e-10
		0.01464	-1.37905e-10	-1.07953e-10	-1.19185e-10
		0.01466	-1.36657e-10	-1.06705e-10	-1.21681e-10
		0.01468	-1.35409e-10	-1.04833e-10	-1.25425e-10
		0.0147	-1.34785e-10	-1.04209e-10	-1.27921e-10
		0.01472	-1.34785e-10	-1.02337e-10	-1.27921e-10
		0.01474	-1.34161e-10	-1.02961e-10	-1.27921e-10
		0.01476	-1.37281e-10	-1.03585e-10	-1.27921e-10
		0.01478	-1.37905e-10	-1.05457e-10	-1.27297e-10
		0.0148	-1.40401e-10	-1.05457e-10	-1.26673e-10
		0.01482	-1.40401e-10	-1.06081e-10	-1.26049e-10
		0.01484	-1.37905e-10	-1.06705e-10	-1.25425e-10
		0.01486	-1.36657e-10	-1.05457e-10	-1.23553e-10
		0.01488	-1.36657e-10	-1.04833e-10	-1.26673e-10
		0.0149	-1.33537e-10	-1.06081e-10	-1.26673e-10
		0.01492	-1.33537e-10	-1.05457e-10	-1.25425e-10
		0.01494	-1.33537e-10	-1.06705e-10	-1.21057e-10
		0.01496	-1.34161e-10	-1.06081e-10	-1.17937e-10
		0.01498	-1.34785e-10	-1.06705e-10	-1.16689e-10
		0.015	-1.36033e-10	-1.05457e-10	-1.16065e-10
		0.01502	-1.34785e-10	-1.04833e-10	-1.16065e-10
		0.01504	-1.34785e-10	-1.02961e-10	-1.18561e-10
		0.01506	-1.36033e-10	-1.01713e-10	-1.19809e-10
		0.01508	-1.37281e-10	-1.03585e-10	-1.21057e-10
		0.0151	-1.37281e-10	-1.02961e-10	-1.22305e-10
		0.01512	-1.38529e-10	-1.03585e-10	-1.22305e-10
		0.01514	-1.38529e-10	-1.06705e-10	-1.23553e-10
		0.01516	-1.39153e-10	-1.07329e-10	-1.26049e-10
		0.01518	-1.41025e-10	-1.06705e-10	-1.24801e-10
		0.0152	-1.39777e-10	-1.06705e-10	-1.24801e-10
		0.01522	-1.41649e-10	-1.07329e-10	-1.27921e-10
		0.01524	-1.42897e-10	-1.07953e-10	-1.28545e-10
		0.01526	-1.41025e-10	-1.07953e-10	-1.30417e-10
		0.01528	-1.42273e-10	-1.07329e-10	-1.28545e-10
		0.0153	-1.41649e-10	-1.07329e-10	-1.28545e-10
		0.01532	-1.41025e-10	-1.07329e-10	-1.26673e-10
		0.01534	-1.42897e-10	-1.07329e-10	-1.24801e-10
		0.01536	-1.40401e-10	-1.06705e-10	-1.22929e-10
		0.01538	-1.39777e-10	-1.07953e-10	-1.22305e-10
		0.0154	-1.38529e-10	-1.07953e-10	-1.22929e-10
		0.01542	-1.37905e-10	-1.08577e-10	-1.22305e-10
		0.01544	-1.37905e-10	-1.07329e-10	-1.24801e-10
		0.01546	-1.37905e-10	-1.05457e-10	-1.24177e-10
		0.01548	-1.36657e-10	-1.02961e-10	-1.24801e-10
		0.0155	-1.36657e-10	-1.03585e-10	-1.24177e-10
		0.01552	-1.36033e-10	-1.01089e-10	-1.22305e-10
		0.01554	-1.34785e-10	-1.00465e-10	-1.21057e-10
		0.01556	-1.35409e-10	-9.79689e-11	-1.19809e-10
		0.01558	-1.36657e-10	-9.79689e-11	-1.20433e-10
		0.0156	-1.35409e-10	-9.85929e-11	-1.21057e-10
		0.01562	-1.36657e-10	-9.92169e-11	-1.21057e-10
		0.01564	-1.37905e-10	-1.01089e-10	-1.20433e-10
		0.01566	-1.34785e-10	-1.03585e-10	-1.22305e-10
		0.01568	-1.35409e-10	-1.04833e-10	-1.22305e-10
		0.0157	-1.35409e-10	-1.04833e-10	-1.22929e-10
		0.01572	-1.35409e-10	-1.06705e-10	-1.23553e-10
		0.01574	-1.34785e-10	-1.05457e-10	-1.24177e-10
		0.01576	-1.34785e-10	-1.05457e-10	-1.25425e-10
		0.01578	-1.35409e-10	-1.04209e-10	-1.24801e-10
		0.0158	-1.36657e-10	-1.04209e-10	-1.25425e-10
		0.01582	-1.36657e-10	-1.03585e-10	-1.26673e-10
		0.01584	-1.35409e-10	-1.02961e-10	-1.26673e-10
		0.01586	-1.35409e-10	-1.02337e-10	-1.25425e-10
		0.01588	-1.36657e-10	-1.02961e-10	-1.24801e-10
		0.0159	-1.36657e-10	-1.03585e-10	-1.24801e-10
		0.01592	-1.37281e-10	-1.02337e-10	-1.22305e-10
		0.01594	-1.38529e-10	-1.02961e-10	-1.22305e-10
		0.01596	-1.41025e-10	-1.03585e-10	-1.21057e-10
		0.01598	-1.41025e-10	-1.04833e-10	-1.21057e-10
		0.016	-1.41025e-10	-1.04209e-10	-1.23553e-10
		0.01602	-1.41025e-10	-1.04209e-10	-1.24177e-10
		0.01604	-1.41025e-10	-1.05457e-10	-1.26673e-10
		0.01606	-1.39153e-10	-1.06081e-10	-1.27297e-10
		0.01608	-1.38529e-10	-1.07953e-10	-1.29169e-10
		0.0161	-1.36033e-10	-1.07953e-10	-1.28545e-10
		0.01612	-1.35409e-10	-1.08577e-10	-1.27297e-10
		0.01614	-1.36033e-10	-1.06705e-10	-1.26673e-10
		0.01616	-1.35409e-10	-1.07329e-10	-1.26673e-10
		0.01618	-1.37905e-10	-1.04833e-10	-1.23553e-10
		0.0162	-1.37281e-10	-1.06705e-10	-1.23553e-10
		0.01622	-1.36657e-10	-1.06705e-10	-1.24177e-10
		0.01624	-1.38529e-10	-1.06705e-10	-1.24801e-10
		0.01626	-1.39153e-10	-1.07329e-10	-1.25425e-10
		0.01628	-1.41025e-10	-1.09201e-10	-1.27297e-10
		0.0163	-1.38529e-10	-1.11073e-10	-1.28545e-10
		0.01632	-1.38529e-10	-1.11697e-10	-1.27921e-10
		0.01634	-1.37905e-10	-1.09825e-10	-1.27297e-10
		0.01636	-1.36033e-10	-1.09201e-10	-1.26673e-10
		0.01638	-1.33537e-10	-1.06705e-10	-1.26673e-10
		0.0164	-1.33537e-10	-1.04833e-10	-1.26673e-10
		0.01642	-1.31665e-10	-1.04833e-10	-1.24801e-10
		0.01644	-1.31041e-10	-1.02337e-10	-1.22305e-10
		0.01646	-1.31665e-10	-1.04209e-10	-1.22929e-10
		0.01648	-1.32913e-10	-1.03585e-10	-1.22305e-10
		0.0165	-1.32289e-10	-1.06081e-10	-1.22929e-10
		0.01652	-1.34161e-10	-1.05457e-10	-1.24177e-10
		0.01654	-1.33537e-10	-1.06081e-10	-1.26049e-10
		0.01656	-1.34785e-10	-1.07329e-10	-1.26049e-10
		0.01658	-1.38529e-10	-1.08577e-10	-1.26049e-10
		0.0166	-1.40401e-10	-1.09201e-10	-1.25425e-10
		0.01662	-1.41025e-10	-1.11073e-10	-1.24801e-10
		0.01664	-1.41025e-10	-1.11697e-10	-1.24801e-10
		0.01666	-1.40401e-10	-1.10449e-10	-1.25425e-10
		0.01668	-1.40401e-10	-1.10449e-10	-1.25425e-10
		0.0167	-1.40401e-10	-1.07329e-10	-1.26673e-10
		0.01672	-1.41649e-10	-1.07953e-10	-1.28545e-10
		0.01674	-1.40401e-10	-1.06705e-10	-1.26673e-10
		0.01676	-1.41649e-10	-1.04833e-10	-1.25425e-10
		0.01678	-1.42273e-10	-1.06081e-10	-1.24177e-10
		0.0168	-1.42273e-10	-1.07953e-10	-1.24801e-10
		0.01682	-1.41025e-10	-1.09201e-10	-1.24177e-10
		0.01684	-1.40401e-10	-1.09825e-10	-1.24801e-10
		0.01686	-1.39777e-10	-1.09825e-10	-1.22305e-10
		0.01688	-1.38529e-10	-1.11073e-10	-1.22929e-10
		0.0169	-1.37905e-10	-1.09825e-10	-1.22305e-10
		0.01692	-1.39153e-10	-1.09201e-10	-1.24801e-10
		0.01694	-1.39153e-10	-1.10449e-10	-1.25425e-10
		0.01696	-1.37905e-10	-1.08577e-10	-1.23553e-10
		0.01698	-1.37281e-10	-1.06705e-10	-1.24177e-10
		0.017	-1.34785e-10	-1.06081e-10	-1.22305e-10
		0.01702	-1.33537e-10	-1.06081e-10	-1.22929e-10
		0.01704	-1.33537e-10	-1.06705e-10	-1.22305e-10
		0.01706	-1.32289e-10	-1.04833e-10	-1.24801e-10
		0.01708	-1.32289e-10	-1.05457e-10	-1.24801e-10
		0.0171	-1.34785e-10	-1.05457e-10	-1.26049e-10
		0.01712	-1.36033e-10	-1.06705e-10	-1.28545e-10
		0.01714	-1.36657e-10	-1.06705e-10	-1.27921e-10
		0.01716	-1.36033e-10	-1.06081e-10	-1.27921e-10
		0.01718	-1.36033e-10	-1.06081e-10	-1.27921e-10
		0.0172	-1.36657e-10	-1.04209e-10	-1.30417e-10
		0.01722	-1.36657e-10	-1.02337e-10	-1.31041e-10
		0.01724	-1.38529e-10	-1.02337e-10	-1.30417e-10
		0.01726	-1.38529e-10	-1.01713e-10	-1.31041e-10
		0.01728	-1.40401e-10	-1.02961e-10	-1.27921e-10
		0.0173	-1.40401e-10	-1.05457e-10	-1.27297e-10
		0.01732	-1.39777e-10	-1.06081e-10	-1.26673e-10
		0.01734	-1.38529e-10	-1.07329e-10	-1.27297e-10
		0.01736	-1.37281e-10	-1.08577e-10	-1.30417e-10
		0.01738	-1.36657e-10	-1.08577e-10	-1.29169e-10
		0.0174	-1.36033e-10	-1.09201e-10	-1.31041e-10
		0.01742	-1.32913e-10	-1.08577e-10	-1.29793e-10
		0.01744	-1.33537e-10	-1.08577e-10	-1.29793e-10
		0.01746	-1.33537e-10	-1.05457e-10	-1.29169e-10
		0.01748	-1.34161e-10	-1.04833e-10	-1.27297e-10
		0.0175	-1.34161e-10	-1.03585e-10	-1.26049e-10
		0.01752	-1.32913e-10	-1.03585e-10	-1.26049e-10
		0.01754	-1.34161e-10	-1.04209e-10	-1.24801e-10
		0.01756	-1.34161e-10	-1.05457e-10	-1.24801e-10
		0.01758	-1.34161e-10	-1.06705e-10	-1.24177e-10
		0.0176	-1.35409e-10	-1.07953e-10	-1.25425e-10
		0.01762	-1.35409e-10	-1.07329e-10	-1.25425e-10
		0.01764	-1.37281e-10	-1.08577e-10	-1.24177e-10
		0.01766	-1.37281e-10	-1.07329e-10	-1.25425e-10
		0.01768	-1.38529e-10	-1.06705e-10	-1.24801e-10
		0.0177	-1.39153e-10	-1.04833e-10	-1.23553e-10
		0.01772	-1.40401e-10	-1.04209e-10	-1.22305e-10
		0.01774	-1.40401e-10	-1.03585e-10	-1.21057e-10
		0.01776	-1.42273e-10	-1.02337e-10	-1.20433e-10
		0.01778	-1.41025e-10	-1.04209e-10	-1.19185e-10
		0.0178	-1.43521e-10	-1.04833e-10	-1.18561e-10
		0.01782	-1.41025e-10	-1.06705e-10	-1.21057e-10
		0.01784	-1.40401e-10	-1.07329e-10	-1.22929e-10
		0.01786	-1.39777e-10	-1.07953e-10	-1.24801e-10
		0.01788	-1.36657e-10	-1.09201e-10	-1.26049e-10
		0.0179	-1.35409e-10	-1.07953e-10	-1.24801e-10
		0.01792	-1.35409e-10	-1.07329e-10	-1.26673e-10
		0.01794	-1.34785e-10	-1.07329e-10	-1.25425e-10
		0.01796	-1.36657e-10	-1.07329e-10	-1.23553e-10
		0.01798	-1.37281e-10	-1.07329e-10	-1.22929e-10
		0.018	-1.37281e-10	-1.06705e-10	-1.20433e-10
		0.01802	-1.37281e-10	-1.04833e-10	-1.20433e-10
		0.01804	-1.37281e-10	-1.04833e-10	-1.20433e-10
		0.01806	-1.34785e-10	-1.04209e-10	-1.21057e-10
		0.01808	-1.35409e-10	-1.04209e-10	-1.23553e-10
		0.0181	-1.34785e-10	-1.02961e-10	-1.24177e-10
		0.01812	-1.36033e-10	-1.03585e-10	-1.24801e-10
		0.01814	-1.37905e-10	-1.01713e-10	-1.25425e-10
		0.01816	-1.38529e-10	-1.01713e-10	-1.25425e-10
		0.01818	-1.39153e-10	-1.01713e-10	-1.24177e-10
		0.0182	-1.38529e-10	-1.01713e-10	-1.21057e-10
		0.01822	-1.38529e-10	-1.04209e-10	-1.21057e-10
		0.01824	-1.37905e-10	-1.05457e-10	-1.22305e-10
		0.01826	-1.37905e-10	-1.07329e-10	-1.22929e-10
		0.01828	-1.37905e-10	-1.07953e-10	-1.25425e-10
		0.0183	-1.37905e-10	-1.09201e-10	-1.27921e-10
		0.01832	-1.38529e-10	-1.07953e-10	-1.27921e-10
		0.01834	-1.39153e-10	-1.06081e-10	-1.26673e-10
		0.01836	-1.38529e-10	-1.05457e-10	-1.27297e-10
		0.01838	-1.36657e-10	-1.04833e-10	-1.27297e-10
		0.0184	-1.35409e-10	-1.03585e-10	-1.26673e-10
		0.01842	-1.36033e-10	-1.01089e-10	-1.25425e-10
		0.01844	-1.31665e-10	-1.01713e-10	-1.24801e-10
		0.01846	-1.31665e-10	-1.02337e-10	-1.24177e-10
		0.01848	-1.31041e-10	-9.98409e-11	-1.23553e-10
		0.0185	-1.31041e-10	-1.01089e-10	-1.22929e-10
		0.01852	-1.29793e-10	-1.00465e-10	-1.23553e-10
		0.01854	-1.31041e-10	-1.00465e-10	-1.21681e-10
		0.01856	-1.32289e-10	-1.01089e-10	-1.19809e-10
		0.01858	-1.32913e-10	-1.01089e-10	-1.19809e-10
		0.0186	-1.35409e-10	-1.01089e-10	-1.18561e-10
		0.01862	-1.36033e-10	-1.04209e-10	-1.19185e-10
		0.01864	-1.37905e-10	-1.04209e-10	-1.19185e-10
		0.01866	-1.37905e-10	-1.03585e-10	-1.19185e-10
		0.01868	-1.37281e-10	-1.03585e-10	-1.20433e-10
		0.0187	-1.35409e-10	-1.05457e-10	-1.21057e-10
		0.01872	-1.36657e-10	-1.06705e-10	-1.22305e-10
		0.01874	-1.36657e-10	-1.06081e-10	-1.22929e-10
		0.01876	-1.37905e-10	-1.06705e-10	-1.22929e-10
		0.01878	-1.39153e-10	-1.06705e-10	-1.23553e-10
		0.0188	-1.39153e-10	-1.06081e-10	-1.23553e-10
		0.01882	-1.37281e-10	-1.06081e-10	-1.24177e-10
		0.01884	-1.36657e-10	-1.06081e-10	-1.24177e-10
		0.01886	-1.36033e-10	-1.06081e-10	-1.23553e-10
		0.01888	-1.36033e-10	-1.06081e-10	-1.26049e-10
		0.0189	-1.35409e-10	-1.05457e-10	-1.26049e-10
		0.01892	-1.35409e-10	-1.04209e-10	-1.26673e-10
		0.01894	-1.35409e-10	-1.04209e-10	-1.26673e-10
		0.01896	-1.36657e-10	-1.04209e-10	-1.24177e-10
		0.01898	-1.35409e-10	-1.03585e-10	-1.22929e-10
		0.019	-1.35409e-10	-1.03585e-10	-1.22929e-10
		0.01902	-1.32289e-10	-1.03585e-10	-1.21057e-10
		0.01904	-1.32289e-10	-1.06081e-10	-1.19809e-10
		0.01906	-1.32289e-10	-1.07329e-10	-1.19185e-10
		0.01908	-1.34785e-10	-1.09825e-10	-1.19809e-10
		0.0191	-1.35409e-10	-1.09825e-10	-1.20433e-10
		0.01912	-1.37281e-10	-1.10449e-10	-1.21057e-10
		0.01914	-1.39153e-10	-1.09825e-10	-1.21057e-10
		0.01916	-1.38529e-10	-1.09201e-10	-1.21681e-10
		0.01918	-1.37905e-10	-1.09825e-10	-1.20433e-10
		0.0192	-1.37281e-10	-1.07953e-10	-1.19809e-10
		0.01922	-1.36033e-10	-1.07329e-10	-1.19809e-10
		0.01924	-1.34161e-10	-1.06705e-10	-1.19809e-10
		0.01926	-1.34161e-10	-1.07329e-10	-1.21057e-10
		0.01928	-1.34161e-10	-1.04833e-10	-1.21681e-10
		0.0193	-1.34785e-10	-1.04209e-10	-1.23553e-10
		0.01932	-1.35409e-10	-1.04209e-10	-1.24801e-10
		0.01934	-1.36657e-10	-1.03585e-10	-1.26049e-10
		0.01936	-1.36657e-10	-1.06081e-10	-1.25425e-10
		0.01938	-1.36033e-10	-1.07329e-10	-1.24177e-10
		0.0194	-1.33537e-10	-1.07329e-10	-1.24177e-10
		0.01942	-1.32913e-10	-1.07329e-10	-1.23553e-10
		0.01944	-1.30417e-10	-1.06081e-10	-1.22929e-10
		0.01946	-1.31041e-10	-1.06705e-10	-1.22305e-10
		0.01948	-1.32289e-10	-1.07953e-10	-1.22929e-10
		0.0195	-1.32289e-10	-1.07329e-10	-1.24177e-10
		0.01952	-1.33537e-10	-1.09201e-10	-1.24177e-10
		0.01954	-1.36657e-10	-1.07329e-10	-1.23553e-10
		0.01956	-1.35409e-10	-1.07953e-10	-1.23553e-10
		0.01958	-1.37281e-10	-1.07953e-10	-1.25425e-10
		0.0196	-1.38529e-10	-1.07953e-10	-1.24177e-10
		0.01962	-1.41649e-10	-1.07953e-10	-1.26049e-10
		0.01964	-1.41649e-10	-1.07953e-10	-1.26673e-10
		0.01966	-1.41025e-10	-1.07329e-10	-1.26049e-10
		0.01968	-1.41025e-10	-1.06081e-10	-1.24801e-10
		0.0197	-1.40401e-10	-1.05457e-10	-1.23553e-10
		0.01972	-1.37905e-10	-1.04209e-10	-1.23553e-10
		0.01974	-1.36033e-10	-1.05457e-10	-1.21057e-10
		0.01976	-1.35409e-10	-1.04833e-10	-1.22305e-10
		0.01978	-1.36033e-10	-1.04833e-10	-1.21057e-10
		0.0198	-1.35409e-10	-1.04833e-10	-1.22305e-10
		0.01982	-1.37905e-10	-1.05457e-10	-1.22305e-10
		0.01984	-1.37281e-10	-1.03585e-10	-1.24177e-10
		0.01986	-1.37281e-10	-1.04209e-10	-1.24801e-10
		0.01988	-1.36033e-10	-1.03585e-10	-1.25425e-10
		0.0199	-1.36033e-10	-1.04833e-10	-1.26049e-10
		0.01992	-1.37281e-10	-1.04833e-10	-1.25425e-10
		0.01994	-1.36033e-10	-1.07329e-10	-1.26673e-10
		0.01996	-1.33537e-10	-1.07953e-10	-1.25425e-10
		0.01998	-1.33537e-10	-1.08577e-10	-1.25425e-10
		0.02	-1.31665e-10	-1.08577e-10	-1.27297e-10
		0.02002	-1.31665e-10	-1.07953e-10	-1.26049e-10
		0.02004	-1.33537e-10	-1.07329e-10	-1.24801e-10
		0.02006	-1.32913e-10	-1.09201e-10	-1.24177e-10
		0.02008	-1.34161e-10	-1.08577e-10	-1.22929e-10
		0.0201	-1.35409e-10	-1.08577e-10	-1.21681e-10
		0.02012	-1.36033e-10	-1.09201e-10	-1.22305e-10
		0.02014	-1.36033e-10	-1.07329e-10	-1.24177e-10
		0.02016	-1.36657e-10	-1.07329e-10	-1.22305e-10
		0.02018	-1.37281e-10	-1.07329e-10	-1.22305e-10
		0.0202	-1.36657e-10	-1.07953e-10	-1.22929e-10
		0.02022	-1.37905e-10	-1.06081e-10	-1.22305e-10
		0.02024	-1.37905e-10	-1.04833e-10	-1.24177e-10
		0.02026	-1.36033e-10	-1.04833e-10	-1.23553e-10
		0.02028	-1.34785e-10	-1.03585e-10	-1.23553e-10
		0.0203	-1.32913e-10	-1.04209e-10	-1.22305e-10
		0.02032	-1.31665e-10	-1.02337e-10	-1.24177e-10
		0.02034	-1.31041e-10	-1.03585e-10	-1.24177e-10
		0.02036	-1.31665e-10	-1.02961e-10	-1.25425e-10
		0.02038	-1.33537e-10	-1.02337e-10	-1.24801e-10
		0.0204	-1.36033e-10	-1.02337e-10	-1.24177e-10
		0.02042	-1.36657e-10	-1.02961e-10	-1.22929e-10
		0.02044	-1.38529e-10	-1.04833e-10	-1.22305e-10
		0.02046	-1.40401e-10	-1.04209e-10	-1.21681e-10
		0.02048	-1.39153e-10	-1.04833e-10	-1.20433e-10
		0.0205	-1.39153e-10	-1.03585e-10	-1.18561e-10
		0.02052	-1.38529e-10	-1.02961e-10	-1.17313e-10
		0.02054	-1.37905e-10	-1.02961e-10	-1.17313e-10
		0.02056	-1.36657e-10	-1.01089e-10	-1.17313e-10
		0.02058	-1.36657e-10	-1.01713e-10	-1.17313e-10
		0.0206	-1.35409e-10	-1.02337e-10	-1.17937e-10
		0.02062	-1.35409e-10	-1.03585e-10	-1.18561e-10
		0.02064	-1.36033e-10	-1.04833e-10	-1.20433e-10
		0.02066	-1.36033e-10	-1.06705e-10	-1.21681e-10
		0.02068	-1.34161e-10	-1.07329e-10	-1.21681e-10
		0.0207	-1.34785e-10	-1.07329e-10	-1.21681e-10
		0.02072	-1.35409e-10	-1.07329e-10	-1.20433e-10
		0.02074	-1.36033e-10	-1.09201e-10	-1.18561e-10
		0.02076	-1.37281e-10	-1.11073e-10	-1.17937e-10
		0.02078	-1.40401e-10	-1.10449e-10	-1.17313e-10
		0.0208	-1.39777e-10	-1.09825e-10	-1.20433e-10
		0.02082	-1.39777e-10	-1.06705e-10	-1.19185e-10
		0.02084	-1.39153e-10	-1.05457e-10	-1.20433e-10
		0.02086	-1.38529e-10	-1.04209e-10	-1.21057e-10
		0.02088	-1.37905e-10	-1.02961e-10	-1.19809e-10
		0.0209	-1.34161e-10	-1.00465e-10	-1.19185e-10
		0.02092	-1.34161e-10	-1.01713e-10	-1.20433e-10
		0.02094	-1.32913e-10	-1.04833e-10	-1.21681e-10
		0.02096	-1.34785e-10	-1.04209e-10	-1.23553e-10
		0.02098	-1.37281e-10	-1.06081e-10	-1.24801e-10
		0.021	-1.39777e-10	-1.06081e-10	-1.24801e-10
		0.02102	-1.41649e-10	-1.06081e-10	-1.26049e-10
		0.02104	-1.40401e-10	-1.06081e-10	-1.27297e-10
		0.02106	-1.38529e-10	-1.05457e-10	-1.26673e-10
		0.02108	-1.39153e-10	-1.04209e-10	-1.26673e-10
		0.0211	-1.36657e-10	-1.06081e-10	-1.26049e-10
		0.02112	-1.34785e-10	-1.04833e-10	-1.27297e-10
		0.02114	-1.35409e-10	-1.06705e-10	-1.26673e-10
		0.02116	-1.34785e-10	-1.06081e-10	-1.25425e-10
		0.02118	-1.34785e-10	-1.06705e-10	-1.24801e-10
		0.0212	-1.34785e-10	-1.05457e-10	-1.22929e-10
		0.02122	-1.34161e-10	-1.05457e-10	-1.22305e-10
		0.02124	-1.31041e-10	-1.04209e-10	-1.21057e-10
		0.02126	-1.31041e-10	-1.04833e-10	-1.21057e-10
		0.02128	-1.32913e-10	-1.04833e-10	-1.20433e-10
		0.0213	-1.31041e-10	-1.06705e-10	-1.21681e-10
		0.02132	-1.32289e-10	-1.07329e-10	-1.21057e-10
		0.02134	-1.31665e-10	-1.07329e-10	-1.22305e-10
		0.02136	-1.31665e-10	-1.07329e-10	-1.22929e-10
		0.02138	-1.32289e-10	-1.07953e-10	-1.21681e-10
		0.0214	-1.33537e-10	-1.07329e-10	-1.21681e-10
		0.02142	-1.31665e-10	-1.07329e-10	-1.22929e-10
		0.02144	-1.32913e-10	-1.06705e-10	-1.22929e-10
		0.02146	-1.32289e-10	-1.05457e-10	-1.23553e-10
		0.02148	-1.33537e-10	-1.03585e-10	-1.24177e-10
		0.0215	-1.33537e-10	-1.02961e-10	-1.22929e-10
		0.02152	-1.34785e-10	-1.03585e-10	-1.22929e-10
		0.02154	-1.34161e-10	-1.03585e-10	-1.21057e-10
		0.02156	-1.37905e-10	-1.05457e-10	-1.19809e-10
		0.02158	-1.37905e-10	-1.06705e-10	-1.19185e-10
		0.0216	-1.39153e-10	-1.07953e-10	-1.19809e-10
		0.02162	-1.39153e-10	-1.09201e-10	-1.21681e-10
		0.02164	-1.37905e-10	-1.10449e-10	-1.21681e-10
		0.02166	-1.39777e-10	-1.09825e-10	-1.21681e-10
		0.02168	-1.38529e-10	-1.09201e-10	-1.21681e-10
		0.0217	-1.39153e-10	-1.09825e-10	-1.22305e-10
		0.02172	-1.39153e-10	-1.08577e-10	-1.20433e-10
		0.02174	-1.38529e-10	-1.06705e-10	-1.19809e-10
		0.02176	-1.38529e-10	-1.06081e-10	-1.19809e-10
		0.02178	-1.37281e-10	-1.06705e-10	-1.19809e-10
		0.0218	-1.36033e-10	-1.07329e-10	-1.20433e-10
		0.02182	-1.35409e-10	-1.07329e-10	-1.21057e-10
		0.02184	-1.35409e-10	-1.06705e-10	-1.22305e-10
		0.02186	-1.37281e-10	-1.07329e-10	-1.21057e-10
		0.02188	-1.38529e-10	-1.06081e-10	-1.22305e-10
		0.0219	-1.38529e-10	-1.07329e-10	-1.21057e-10
		0.02192	-1.39153e-10	-1.05457e-10	-1.20433e-10
		0.02194	-1.38529e-10	-1.06705e-10	-1.19185e-10
		0.02196	-1.37905e-10	-1.06705e-10	-1.19809e-10
		0.02198	-1.38529e-10	-1.05457e-10	-1.19185e-10
		0.022	-1.37905e-10	-1.04833e-10	-1.19185e-10
		0.02202	-1.39153e-10	-1.04833e-10	-1.20433e-10
		0.02204	-1.37905e-10	-1.04833e-10	-1.20433e-10
		0.02206	-1.39153e-10	-1.06081e-10	-1.20433e-10
		0.02208	-1.38529e-10	-1.05457e-10	-1.19809e-10
		0.0221	-1.37905e-10	-1.06081e-10	-1.19809e-10
		0.02212	-1.37281e-10	-1.07329e-10	-1.20433e-10
		0.02214	-1.34785e-10	-1.07953e-10	-1.21681e-10
		0.02216	-1.32289e-10	-1.07953e-10	-1.22929e-10
		0.02218	-1.32289e-10	-1.08577e-10	-1.22929e-10
		0.0222	-1.32289e-10	-1.08577e-10	-1.22305e-10
		0.02222	-1.33537e-10	-1.07329e-10	-1.24177e-10
		0.02224	-1.36033e-10	-1.07329e-10	-1.22305e-10
		0.02226	-1.37905e-10	-1.07329e-10	-1.22305e-10
		0.02228	-1.38529e-10	-1.09201e-10	-1.23553e-10
		0.0223	-1.39153e-10	-1.10449e-10	-1.24177e-10
		0.02232	-1.39153e-10	-1.09825e-10	-1.23553e-10
		0.02234	-1.37905e-10	-1.07953e-10	-1.24801e-10
		0.02236	-1.36033e-10	-1.06081e-10	-1.23553e-10
		0.02238	-1.36033e-10	-1.06705e-10	-1.21057e-10
		0.0224	-1.37281e-10	-1.04833e-10	-1.21681e-10
		0.02242	-1.36657e-10	-1.05457e-10	-1.22305e-10
		0.02244	-1.37905e-10	-1.06081e-10	-1.21681e-10
		0.02246	-1.34785e-10	-1.05457e-10	-1.24177e-10
		0.02248	-1.35409e-10	-1.05457e-10	-1.23553e-10
		0.0225	-1.34785e-10	-1.06081e-10	-1.24177e-10
		0.02252	-1.35409e-10	-1.07329e-10	-1.24177e-10
		0.02254	-1.36033e-10	-1.05457e-10	-1.24801e-10
		0.02256	-1.38529e-10	-1.04833e-10	-1.23553e-10
		0.02258	-1.39777e-10	-1.03585e-10	-1.21057e-10
		0.0226	-1.36657e-10	-1.06081e-10	-1.21057e-10
		0.02262	-1.37905e-10	-1.06081e-10	-1.19809e-10
		0.02264	-1.38529e-10	-1.07329e-10	-1.20433e-10
		0.02266	-1.39153e-10	-1.08577e-10	-1.21057e-10
		0.02268	-1.38529e-10	-1.09201e-10	-1.21681e-10
		0.0227	-1.37281e-10	-1.07953e-10	-1.24177e-10
		0.02272	-1.34785e-10	-1.07953e-10	-1.26049e-10
		0.02274	-1.34785e-10	-1.07329e-10	-1.26673e-10
		0.02276	-1.35409e-10	-1.07329e-10	-1.26673e-10
		0.02278	-1.36033e-10	-1.07329e-10	-1.26673e-10
		0.0228	-1.36657e-10	-1.07329e-10	-1.24177e-10
		0.02282	-1.37281e-10	-1.07329e-10	-1.24177e-10
		0.02284	-1.36033e-10	-1.07329e-10	-1.21681e-10
		0.02286	-1.36033e-10	-1.09825e-10	-1.23553e-10
		0.02288	-1.36033e-10	-1.08577e-10	-1.24801e-10
		0.0229	-1.36033e-10	-1.10449e-10	-1.22929e-10
		0.02292	-1.35409e-10	-1.09825e-10	-1.22305e-10
		0.02294	-1.36033e-10	-1.10449e-10	-1.22305e-10
		0.02296	-1.36033e-10	-1.09825e-10	-1.21057e-10
		0.02298	-1.36657e-10	-1.07953e-10	-1.19809e-10
		0.023	-1.36657e-10	-1.07953e-10	-1.19185e-10
		0.02302	-1.36657e-10	-1.07329e-10	-1.17937e-10
		0.02304	-1.37281e-10	-1.06081e-10	-1.17313e-10
		0.02306	-1.34785e-10	-1.06705e-10	-1.14817e-10
		0.02308	-1.37281e-10	-1.05457e-10	-1.15441e-10
		0.0231	-1.36657e-10	-1.06081e-10	-1.15441e-10
		0.02312	-1.36033e-10	-1.06081e-10	-1.17313e-10
		0.02314	-1.36033e-10	-1.08577e-10	-1.19185e-10
		0.02316	-1.36033e-10	-1.09201e-10	-1.21057e-10
		0.02318	-1.36657e-10	-1.09201e-10	-1.22929e-10
		0.0232	-1.36033e-10	-1.09825e-10	-1.26049e-10
		0.02322	-1.36033e-10	-1.09825e-10	-1.26049e-10
		0.02324	-1.35409e-10	-1.11697e-10	-1.26673e-10
		0.02326	-1.35409e-10	-1.08577e-10	-1.27297e-10
		0.02328	-1.34785e-10	-1.07953e-10	-1.25425e-10
		0.0233	-1.35409e-10	-1.06705e-10	-1.24801e-10
		0.02332	-1.35409e-10	-1.06081e-10	-1.21057e-10
		0.02334	-1.36657e-10	-1.04833e-10	-1.20433e-10
		0.02336	-1.37281e-10	-1.04833e-10	-1.20433e-10
		0.02338	-1.39153e-10	-1.04209e-10	-1.21681e-10
		0.0234	-1.38529e-10	-1.04833e-10	-1.19809e-10
		0.02342	-1.39777e-10	-1.05457e-10	-1.22305e-10
		0.02344	-1.39777e-10	-1.06705e-10	-1.21057e-10
		0.02346	-1.41025e-10	-1.09825e-10	-1.21057e-10
		0.02348	-1.40401e-10	-1.10449e-10	-1.24177e-10
		0.0235	-1.39153e-10	-1.09825e-10	-1.24177e-10
		0.02352	-1.38529e-10	-1.10449e-10	-1.24177e-10
		0.02354	-1.38529e-10	-1.11073e-10	-1.24801e-10
		0.02356	-1.37281e-10	-1.09825e-10	-1.24801e-10
		0.02358	-1.35409e-10	-1.09825e-10	-1.24801e-10
		0.0236	-1.36033e-10	-1.09201e-10	-1.24177e-10
		0.02362	-1.37281e-10	-1.06705e-10	-1.23553e-10
		0.02364	-1.39777e-10	-1.04833e-10	-1.22929e-10
		0.02366	-1.41025e-10	-1.04209e-10	-1.24177e-10
		0.02368	-1.41025e-10	-1.05457e-10	-1.22305e-10
		0.0237	-1.40401e-10	-1.05457e-10	-1.21681e-10
		0.02372	-1.39153e-10	-1.05457e-10	-1.22305e-10
		0.02374	-1.38529e-10	-1.06081e-10	-1.21681e-10
		0.02376	-1.37905e-10	-1.06705e-10	-1.20433e-10
		0.02378	-1.38529e-10	-1.06081e-10	-1.17937e-10
		0.0238	-1.38529e-10	-1.05457e-10	-1.19809e-10
		0.02382	-1.36657e-10	-1.06705e-10	-1.19809e-10
		0.02384	-1.36657e-10	-1.06081e-10	-1.21057e-10
		0.02386	-1.35409e-10	-1.05457e-10	-1.19809e-10
		0.02388	-1.36657e-10	-1.06081e-10	-1.21681e-10
		0.0239	-1.38529e-10	-1.04209e-10	-1.20433e-10
		0.02392	-1.38529e-10	-1.04833e-10	-1.18561e-10
		0.02394	-1.38529e-10	-1.06081e-10	-1.19185e-10
		0.02396	-1.37905e-10	-1.06705e-10	-1.17313e-10
		0.02398	-1.37281e-10	-1.06705e-10	-1.19809e-10
		0.024	-1.34785e-10	-1.07329e-10	-1.20433e-10
		0.02402	-1.36033e-10	-1.07953e-10	-1.22305e-10
		0.02404	-1.34161e-10	-1.06705e-10	-1.22305e-10
		0.02406	-1.35409e-10	-1.07329e-10	-1.23553e-10
		0.02408	-1.35409e-10	-1.07329e-10	-1.22305e-10
		0.0241	-1.37905e-10	-1.07329e-10	-1.20433e-10
		0.02412	-1.36657e-10	-1.09825e-10	-1.18561e-10
		0.02414	-1.37281e-10	-1.10449e-10	-1.17313e-10
		0.02416	-1.36657e-10	-1.10449e-10	-1.19185e-10
		0.02418	-1.36657e-10	-1.10449e-10	-1.20433e-10
		0.0242	-1.37281e-10	-1.07953e-10	-1.22305e-10
		0.02422	-1.38529e-10	-1.07953e-10	-1.24177e-10
		0.02424	-1.39153e-10	-1.08577e-10	-1.24801e-10
		0.02426	-1.38529e-10	-1.07953e-10	-1.24801e-10
		0.02428	-1.38529e-10	-1.08577e-10	-1.24177e-10
		0.0243	-1.39153e-10	-1.08577e-10	-1.22929e-10
		0.02432	-1.39153e-10	-1.08577e-10	-1.22305e-10
		0.02434	-1.38529e-10	-1.08577e-10	-1.22305e-10
		0.02436	-1.39777e-10	-1.06705e-10	-1.21681e-10
		0.02438	-1.40401e-10	-1.06705e-10	-1.20433e-10
		0.0244	-1.41025e-10	-1.09201e-10	-1.20433e-10
		0.02442	-1.40401e-10	-1.07953e-10	-1.19185e-10
		0.02444	-1.39153e-10	-1.11073e-10	-1.19809e-10
		0.02446	-1.37281e-10	-1.11697e-10	-1.21057e-10
		0.02448	-1.36657e-10	-1.12321e-10	-1.21681e-10
		0.0245	-1.34161e-10	-1.10449e-10	-1.22929e-10
		0.02452	-1.30417e-10	-1.07953e-10	-1.24801e-10
		0.02454	-1.30417e-10	-1.07329e-10	-1.23553e-10
		0.02456	-1.29793e-10	-1.05457e-10	-1.23553e-10
		0.02458	-1.33537e-10	-1.03585e-10	-1.21057e-10
		0.0246	-1.36033e-10	-1.04209e-10	-1.20433e-10
		0.02462	-1.38529e-10	-1.04209e-10	-1.19809e-10
		0.02464	-1.40401e-10	-1.02961e-10	-1.19809e-10
		0.02466	-1.41025e-10	-1.02337e-10	-1.22305e-10
		0.02468	-1.40401e-10	-1.02337e-10	-1.24177e-10
		0.0247	-1.41649e-10	-1.02961e-10	-1.26673e-10
		0.02472	-1.42897e-10	-1.01713e-10	-1.27297e-10
		0.02474	-1.42897e-10	-1.03585e-10	-1.26673e-10
		0.02476	-1.43521e-10	-1.04209e-10	-1.23553e-10
		0.02478	-1.42273e-10	-1.06705e-10	-1.22929e-10
		0.0248	-1.41649e-10	-1.08577e-10	-1.20433e-10
		0.02482	-1.39153e-10	-1.08577e-10	-1.19809e-10
		0.02484	-1.36657e-10	-1.09825e-10	-1.21057e-10
		0.02486	-1.37281e-10	-1.09825e-10	-1.21681e-10
		0.02488	-1.35409e-10	-1.10449e-10	-1.20433e-10
		0.0249	-1.36033e-10	-1.08577e-10	-1.21057e-10
		0.02492	-1.36657e-10	-1.09201e-10	-1.18561e-10
		0.02494	-1.39153e-10	-1.06705e-10	-1.17937e-10
		0.02496	-1.38529e-10	-1.07953e-10	-1.19185e-10
		0.02498	-1.39153e-10	-1.06705e-10	-1.19185e-10
		0.025	-1.38529e-10	-1.07329e-10	-1.19809e-10
		0.02502	-1.39153e-10	-1.08577e-10	-1.23553e-10
		0.02504	-1.37281e-10	-1.09201e-10	-1.22929e-10
		0.02506	-1.37281e-10	-1.09201e-10	-1.24177e-10
		0.02508	-1.38529e-10	-1.09201e-10	-1.21681e-10
		0.0251	-1.37905e-10	-1.09825e-10	-1.20433e-10
		0.02512	-1.36657e-10	-1.07329e-10	-1.18561e-10
		0.02514	-1.36033e-10	-1.06081e-10	-1.18561e-10
		0.02516	-1.32289e-10	-1.05457e-10	-1.17313e-10
		0.02518	-1.32289e-10	-1.05457e-10	-1.20433e-10
		0.0252	-1.33537e-10	-1.06081e-10	-1.19809e-10
		0.02522	-1.36033e-10	-1.07329e-10	-1.21057e-10
		0.02524	-1.37905e-10	-1.07329e-10	-1.19809e-10
		0.02526	-1.39777e-10	-1.09201e-10	-1.16689e-10
		0.02528	-1.39777e-10	-1.11697e-10	-1.16065e-10
		0.0253	-1.39777e-10	-1.11697e-10	-1.14193e-10
		0.02532	-1.39777e-10	-1.11697e-10	-1.14193e-10
		0.02534	-1.39153e-10	-1.11073e-10	-1.16689e-10
		0.02536	-1.37905e-10	-1.09825e-10	-1.17937e-10
		0.02538	-1.37905e-10	-1.07953e-10	-1.19185e-10
		0.0254	-1.37281e-10	-1.06705e-10	-1.19809e-10
		0.02542	-1.38529e-10	-1.06705e-10	-1.21057e-10
		0.02544	-1.37905e-10	-1.06705e-10	-1.22305e-10
		0.02546	-1.36033e-10	-1.07329e-10	-1.20433e-10
		0.02548	-1.36033e-10	-1.07953e-10	-1.19809e-10
		0.0255	-1.34161e-10	-1.07953e-10	-1.21057e-10
		0.02552	-1.34161e-10	-1.07329e-10	-1.21057e-10
		0.02554	-1.34161e-10	-1.06081e-10	-1.21681e-10
		0.02556	-1.37905e-10	-1.06081e-10	-1.19809e-10
		0.02558	-1.39777e-10	-1.09201e-10	-1.19809e-10
		0.0256	-1.40401e-10	-1.08577e-10	-1.16689e-10
		0.02562	-1.41649e-10	-1.09825e-10	-1.16689e-10
		0.02564	-1.40401e-10	-1.11073e-10	-1.14817e-10
		0.02566	-1.40401e-10	-1.11073e-10	-1.15441e-10
		0.02568	-1.38529e-10	-1.10449e-10	-1.16065e-10
		0.0257	-1.38529e-10	-1.09825e-10	-1.17313e-10
		0.02572	-1.39777e-10	-1.09201e-10	-1.17313e-10
		0.02574	-1.39777e-10	-1.09201e-10	-1.17937e-10
		0.02576	-1.39153e-10	-1.08577e-10	-1.18561e-10
		0.02578	-1.39153e-10	-1.08577e-10	-1.21057e-10
		0.0258	-1.39153e-10	-1.07329e-10	-1.22305e-10
		0.02582	-1.37281e-10	-1.06705e-10	-1.23553e-10
		0.02584	-1.33537e-10	-1.07329e-10	-1.26049e-10
		0.02586	-1.31041e-10	-1.06081e-10	-1.27921e-10
		0.02588	-1.31665e-10	-1.05457e-10	-1.27297e-10
		0.0259	-1.31665e-10	-1.04833e-10	-1.26673e-10
		0.02592	-1.34785e-10	-1.06705e-10	-1.23553e-10
		0.02594	-1.36657e-10	-1.04833e-10	-1.18561e-10
		0.02596	-1.38529e-10	-1.05457e-10	-1.16689e-10
		0.02598	-1.40401e-10	-1.07953e-10	-1.15441e-10
		0.026	-1.41025e-10	-1.07953e-10	-1.14817e-10
		0.02602	-1.41025e-10	-1.07953e-10	-1.16065e-10
		0.02604	-1.39777e-10	-1.07953e-10	-1.19809e-10
		0.02606	-1.38529e-10	-1.09201e-10	-1.21681e-10
		0.02608	-1.37905e-10	-1.09825e-10	-1.23553e-10
		0.0261	-1.39153e-10	-1.09201e-10	-1.24801e-10
		0.02612	-1.39153e-10	-1.08577e-10	-1.23553e-10
		0.02614	-1.37281e-10	-1.08577e-10	-1.24177e-10
		0.02616	-1.39153e-10	-1.08577e-10	-1.22929e-10
		0.02618	-1.36033e-10	-1.08577e-10	-1.22929e-10
		0.0262	-1.36033e-10	-1.07329e-10	-1.22929e-10
		0.02622	-1.36033e-10	-1.07329e-10	-1.21681e-10
		0.02624	-1.36033e-10	-1.07329e-10	-1.21057e-10
		0.02626	-1.37281e-10	-1.07953e-10	-1.21057e-10
		0.02628	-1.37281e-10	-1.09201e-10	-1.20433e-10
		0.0263	-1.37281e-10	-1.09201e-10	-1.19809e-10
		0.02632	-1.37905e-10	-1.09201e-10	-1.19185e-10
		0.02634	-1.37281e-10	-1.09825e-10	-1.18561e-10
		0.02636	-1.37281e-10	-1.09825e-10	-1.21681e-10
		0.02638	-1.37281e-10	-1.10449e-10	-1.19809e-10
		0.0264	-1.36657e-10	-1.11697e-10	-1.20433e-10
		0.02642	-1.38529e-10	-1.09825e-10	-1.19809e-10
		0.02644	-1.39153e-10	-1.09201e-10	-1.17937e-10
		0.02646	-1.39153e-10	-1.09825e-10	-1.14817e-10
		0.02648	-1.39777e-10	-1.07953e-10	-1.17313e-10
		0.0265	-1.38529e-10	-1.07329e-10	-1.16689e-10
		0.02652	-1.37905e-10	-1.07953e-10	-1.19185e-10
		0.02654	-1.34785e-10	-1.06705e-10	-1.21057e-10
		0.02656	-1.35409e-10	-1.07329e-10	-1.21057e-10
		0.02658	-1.36033e-10	-1.08577e-10	-1.22305e-10
		0.0266	-1.40401e-10	-1.09201e-10	-1.21681e-10
		0.02662	-1.41025e-10	-1.09201e-10	-1.21681e-10
		0.02664	-1.41025e-10	-1.09825e-10	-1.21681e-10
		0.02666	-1.43521e-10	-1.09825e-10	-1.22305e-10
		0.02668	-1.43521e-10	-1.09201e-10	-1.24177e-10
		0.0267	-1.44769e-10	-1.09825e-10	-1.24177e-10
		0.02672	-1.41649e-10	-1.07953e-10	-1.23553e-10
		0.02674	-1.42273e-10	-1.06705e-10	-1.21681e-10
		0.02676	-1.42273e-10	-1.04833e-10	-1.21057e-10
		0.02678	-1.41649e-10	-1.06705e-10	-1.19809e-10
		0.0268	-1.40401e-10	-1.06081e-10	-1.17937e-10
		0.02682	-1.39777e-10	-1.07329e-10	-1.16689e-10
		0.02684	-1.42273e-10	-1.07329e-10	-1.17313e-10
		0.02686	-1.44145e-10	-1.07953e-10	-1.18561e-10
		0.02688	-1.44769e-10	-1.09201e-10	-1.19185e-10
		0.0269	-1.45393e-10	-1.11697e-10	-1.19185e-10
		0.02692	-1.46017e-10	-1.12321e-10	-1.17937e-10
		0.02694	-1.46017e-10	-1.12321e-10	-1.17313e-10
		0.02696	-1.44145e-10	-1.12945e-10	-1.17937e-10
		0.02698	-1.42273e-10	-1.11073e-10	-1.17313e-10
		0.027	-1.41649e-10	-1.10449e-10	-1.17937e-10
		0.02702	-1.40401e-10	-1.09201e-10	-1.17937e-10
		0.02704	-1.39153e-10	-1.06705e-10	-1.17937e-10
		0.02706	-1.40401e-10	-1.04833e-10	-1.18561e-10
		0.02708	-1.39777e-10	-1.04209e-10	-1.19809e-10
		0.0271	-1.40401e-10	-1.03585e-10	-1.19185e-10
		0.02712	-1.39153e-10	-1.04833e-10	-1.20433e-10
		0.02714	-1.37905e-10	-1.06081e-10	-1.21681e-10
		0.02716	-1.36033e-10	-1.08577e-10	-1.22929e-10
		0.02718	-1.34785e-10	-1.09201e-10	-1.22305e-10
		0.0272	-1.35409e-10	-1.11073e-10	-1.22305e-10
		0.02722	-1.35409e-10	-1.11073e-10	-1.22305e-10
		0.02724	-1.36033e-10	-1.12945e-10	-1.21057e-10
		0.02726	-1.36033e-10	-1.11697e-10	-1.18561e-10
		0.02728	-1.36033e-10	-1.14193e-10	-1.19185e-10
		0.0273	-1.36657e-10	-1.13569e-10	-1.17313e-10
		0.02732	-1.38529e-10	-1.13569e-10	-1.16065e-10
		0.02734	-1.38529e-10	-1.11697e-10	-1.17937e-10
		0.02736	-1.37281e-10	-1.11697e-10	-1.16689e-10
		0.02738	-1.36657e-10	-1.08577e-10	-1.18561e-10
		0.0274	-1.38529e-10	-1.09201e-10	-1.19185e-10
		0.02742	-1.38529e-10	-1.08577e-10	-1.19185e-10
		0.02744	-1.37281e-10	-1.09201e-10	-1.17313e-10
		0.02746	-1.39153e-10	-1.09201e-10	-1.17937e-10
		0.02748	-1.39153e-10	-1.11073e-10	-1.19809e-10
		0.0275	-1.40401e-10	-1.09825e-10	-1.19809e-10
		0.02752	-1.39153e-10	-1.10449e-10	-1.21057e-10
		0.02754	-1.39777e-10	-1.10449e-10	-1.19809e-10
		0.02756	-1.41025e-10	-1.08577e-10	-1.22305e-10
		0.02758	-1.44145e-10	-1.08577e-10	-1.22305e-10
		0.0276	-1.47265e-10	-1.08577e-10	-1.21681e-10
		0.02762	-1.49761e-10	-1.07329e-10	-1.21057e-10
		0.02764	-1.49761e-10	-1.07953e-10	-1.20433e-10
		0.02766	-1.49761e-10	-1.07953e-10	-1.17937e-10
		0.02768	-1.46017e-10	-1.07329e-10	-1.17937e-10
		0.0277	-1.43521e-10	-1.07329e-10	-1.17313e-10
		0.02772	-1.41649e-10	-1.06081e-10	-1.19185e-10
		0.02774	-1.41025e-10	-1.06081e-10	-1.18561e-10
		0.02776	-1.41025e-10	-1.07953e-10	-1.17937e-10
		0.02778	-1.41649e-10	-1.07329e-10	-1.18561e-10
		0.0278	-1.42273e-10	-1.09201e-10	-1.21057e-10
		0.02782	-1.43521e-10	-1.09201e-10	-1.20433e-10
		0.02784	-1.44145e-10	-1.11073e-10	-1.22305e-10
		0.02786	-1.46017e-10	-1.09825e-10	-1.21681e-10
		0.02788	-1.45393e-10	-1.08577e-10	-1.22929e-10
		0.0279	-1.45393e-10	-1.09201e-10	-1.22305e-10
		0.02792	-1.44769e-10	-1.09201e-10	-1.22305e-10
		0.02794	-1.45393e-10	-1.09201e-10	-1.24177e-10
		0.02796	-1.45393e-10	-1.07329e-10	-1.21681e-10
		0.02798	-1.44145e-10	-1.07953e-10	-1.21681e-10
		0.028	-1.46641e-10	-1.07953e-10	-1.19809e-10
		0.02802	-1.46017e-10	-1.09201e-10	-1.18561e-10
		0.02804	-1.47265e-10	-1.09201e-10	-1.18561e-10
		0.02806	-1.48513e-10	-1.08577e-10	-1.18561e-10
		0.02808	-1.50385e-10	-1.09201e-10	-1.19185e-10
		0.0281	-1.51009e-10	-1.08577e-10	-1.18561e-10
		0.02812	-1.50385e-10	-1.09201e-10	-1.17937e-10
		0.02814	-1.49761e-10	-1.06081e-10	-1.16689e-10
		0.02816	-1.48513e-10	-1.06705e-10	-1.17937e-10
		0.02818	-1.46641e-10	-1.07329e-10	-1.14817e-10
		0.0282	-1.44145e-10	-1.05457e-10	-1.14193e-10
		0.02822	-1.44145e-10	-1.06705e-10	-1.14193e-10
		0.02824	-1.41025e-10	-1.05457e-10	-1.15441e-10
		0.02826	-1.41649e-10	-1.06705e-10	-1.17313e-10
		0.02828	-1.43521e-10	-1.08577e-10	-1.17313e-10
		0.0283	-1.42273e-10	-1.08577e-10	-1.19809e-10
		0.02832	-1.43521e-10	-1.09201e-10	-1.22305e-10
		0.02834	-1.43521e-10	-1.09825e-10	-1.22305e-10
		0.02836	-1.42273e-10	-1.10449e-10	-1.24177e-10
		0.02838	-1.41649e-10	-1.09201e-10	-1.22305e-10
		0.0284	-1.42273e-10	-1.09201e-10	-1.24801e-10
		0.02842	-1.44769e-10	-1.07953e-10	-1.21057e-10
		0.02844	-1.45393e-10	-1.05457e-10	-1.19809e-10
		0.02846	-1.46017e-10	-1.05457e-10	-1.20433e-10
		0.02848	-1.47265e-10	-1.04833e-10	-1.17313e-10
		0.0285	-1.45393e-10	-1.06081e-10	-1.19185e-10
		0.02852	-1.44769e-10	-1.05457e-10	-1.20433e-10
		0.02854	-1.42897e-10	-1.04209e-10	-1.19185e-10
		0.02856	-1.44145e-10	-1.04209e-10	-1.20433e-10
		0.02858	-1.44145e-10	-1.03585e-10	-1.20433e-10
		0.0286	-1.44145e-10	-1.03585e-10	-1.19809e-10
		0.02862	-1.44145e-10	-1.04209e-10	-1.16689e-10
		0.02864	-1.44145e-10	-1.05457e-10	-1.16065e-10
		0.02866	-1.43521e-10	-1.06705e-10	-1.15441e-10
		0.02868	-1.44145e-10	-1.05457e-10	-1.16689e-10
		0.0287	-1.41649e-10	-1.06081e-10	-1.17313e-10
		0.02872	-1.42273e-10	-1.04833e-10	-1.20433e-10
		0.02874	-1.42273e-10	-1.04209e-10	-1.22305e-10
		0.02876	-1.44145e-10	-1.06081e-10	-1.21681e-10
		0.02878	-1.42897e-10	-1.05457e-10	-1.20433e-10
		0.0288	-1.43521e-10	-1.07953e-10	-1.17937e-10
		0.02882	-1.41649e-10	-1.09201e-10	-1.18561e-10
		0.02884	-1.42273e-10	-1.09201e-10	-1.18561e-10
		0.02886	-1.41649e-10	-1.11073e-10	-1.17937e-10
		0.02888	-1.40401e-10	-1.09825e-10	-1.17313e-10
		0.0289	-1.40401e-10	-1.09201e-10	-1.19185e-10
		0.02892	-1.40401e-10	-1.09201e-10	-1.21681e-10
		0.02894	-1.40401e-10	-1.08577e-10	-1.22929e-10
		0.02896	-1.39777e-10	-1.09825e-10	-1.26049e-10
		0.02898	-1.40401e-10	-1.10449e-10	-1.26049e-10
		0.029	-1.40401e-10	-1.09201e-10	-1.26673e-10
		0.02902	-1.38529e-10	-1.07329e-10	-1.27297e-10
		0.02904	-1.39153e-10	-1.05457e-10	-1.25425e-10
		0.02906	-1.40401e-10	-1.03585e-10	-1.24801e-10
		0.02908	-1.41025e-10	-1.02337e-10	-1.23553e-10
		0.0291	-1.41649e-10	-1.01713e-10	-1.21057e-10
		0.02912	-1.44145e-10	-1.02337e-10	-1.18561e-10
		0.02914	-1.41649e-10	-1.02961e-10	-1.18561e-10
		0.02916	-1.42897e-10	-1.04833e-10	-1.18561e-10
		0.02918	-1.40401e-10	-1.07953e-10	-1.17313e-10
		0.0292	-1.38529e-10	-1.09201e-10	-1.19185e-10
		0.02922	-1.37905e-10	-1.08577e-10	-1.18561e-10
		0.02924	-1.37905e-10	-1.09825e-10	-1.19185e-10
		0.02926	-1.39153e-10	-1.10449e-10	-1.19809e-10
		0.02928	-1.39153e-10	-1.09201e-10	-1.21057e-10
		0.0293	-1.39777e-10	-1.08577e-10	-1.20433e-10
		0.02932	-1.39777e-10	-1.07953e-10	-1.19809e-10
		0.02934	-1.37281e-10	-1.08577e-10	-1.19809e-10
		0.02936	-1.37905e-10	-1.07953e-10	-1.20433e-10
		0.02938	-1.39153e-10	-1.06081e-10	-1.19809e-10
		0.0294	-1.37905e-10	-1.07329e-10	-1.20433e-10
		0.02942	-1.38529e-10	-1.06081e-10	-1.21057e-10
		0.02944	-1.39777e-10	-1.06081e-10	-1.19185e-10
		0.02946	-1.39777e-10	-1.07953e-10	-1.19185e-10
		0.02948	-1.39153e-10	-1.07953e-10	-1.17313e-10
		0.0295	-1.37905e-10	-1.07953e-10	-1.16065e-10
		0.02952	-1.37281e-10	-1.08577e-10	-1.17313e-10
		0.02954	-1.37281e-10	-1.10449e-10	-1.18561e-10
		0.02956	-1.39153e-10	-1.09201e-10	-1.20433e-10
		0.02958	-1.39777e-10	-1.10449e-10	-1.21057e-10
		0.0296	-1.40401e-10	-1.11073e-10	-1.20433e-10
		0.02962	-1.42273e-10	-1.09825e-10	-1.20433e-10
		0.02964	-1.42273e-10	-1.07953e-10	-1.20433e-10
		0.02966	-1.44145e-10	-1.06705e-10	-1.21681e-10
		0.02968	-1.44145e-10	-1.05457e-10	-1.22305e-10
		0.0297	-1.44145e-10	-1.04209e-10	-1.23553e-10
		0.02972	-1.45393e-10	-1.04209e-10	-1.23553e-10
		0.02974	-1.44769e-10	-1.03585e-10	-1.24177e-10
		0.02976	-1.44769e-10	-1.05457e-10	-1.25425e-10
		0.02978	-1.44769e-10	-1.06081e-10	-1.23553e-10
		0.0298	-1.44145e-10	-1.03585e-10	-1.21057e-10
		0.02982	-1.41649e-10	-1.04209e-10	-1.20433e-10
		0.02984	-1.41649e-10	-1.03585e-10	-1.18561e-10
		0.02986	-1.41025e-10	-1.02961e-10	-1.17937e-10
		0.02988	-1.39777e-10	-1.02337e-10	-1.17313e-10
		0.0299	-1.38529e-10	-1.02961e-10	-1.20433e-10
		0.02992	-1.40401e-10	-1.02961e-10	-1.21057e-10
		0.02994	-1.39777e-10	-1.04833e-10	-1.22305e-10
		0.02996	-1.39777e-10	-1.04833e-10	-1.22929e-10
		0.02998	-1.39777e-10	-1.05457e-10	-1.20433e-10
		0.03	-1.39777e-10	-1.06705e-10	-1.19809e-10
		0.03002	-1.37905e-10	-1.07953e-10	-1.20433e-10
		0.03004	-1.36033e-10	-1.08577e-10	-1.21057e-10
		0.03006	-1.36657e-10	-1.09201e-10	-1.21057e-10
		0.03008	-1.33537e-10	-1.09825e-10	-1.21681e-10
		0.0301	-1.36033e-10	-1.09201e-10	-1.23553e-10
		0.03012	-1.35409e-10	-1.07953e-10	-1.24177e-10
		0.03014	-1.35409e-10	-1.06705e-10	-1.23553e-10
		0.03016	-1.35409e-10	-1.06705e-10	-1.22305e-10
		0.03018	-1.36657e-10	-1.05457e-10	-1.22305e-10
		0.0302	-1.37281e-10	-1.02961e-10	-1.21057e-10
		0.03022	-1.38529e-10	-1.01713e-10	-1.20433e-10
		0.03024	-1.38529e-10	-1.03585e-10	-1.20433e-10
		0.03026	-1.39153e-10	-1.04833e-10	-1.19809e-10
		0.03028	-1.40401e-10	-1.04209e-10	-1.19185e-10
		0.0303	-1.39153e-10	-1.05457e-10	-1.19185e-10
		0.03032	-1.39153e-10	-1.04833e-10	-1.19809e-10
		0.03034	-1.38529e-10	-1.05457e-10	-1.19185e-10
		0.03036	-1.38529e-10	-1.05457e-10	-1.19185e-10
		0.03038	-1.39153e-10	-1.06081e-10	-1.19185e-10
		0.0304	-1.39153e-10	-1.06705e-10	-1.19809e-10
		0.03042	-1.40401e-10	-1.08577e-10	-1.19809e-10
		0.03044	-1.40401e-10	-1.08577e-10	-1.20433e-10
		0.03046	-1.39777e-10	-1.07953e-10	-1.20433e-10
		0.03048	-1.38529e-10	-1.07329e-10	-1.21057e-10
		0.0305	-1.39153e-10	-1.07953e-10	-1.24801e-10
		0.03052	-1.39153e-10	-1.06081e-10	-1.25425e-10
		0.03054	-1.38529e-10	-1.03585e-10	-1.25425e-10
		0.03056	-1.39153e-10	-1.03585e-10	-1.25425e-10
		0.03058	-1.38529e-10	-1.03585e-10	-1.24801e-10
		0.0306	-1.40401e-10	-1.05457e-10	-1.21681e-10
		0.03062	-1.39777e-10	-1.05457e-10	-1.19185e-10
		0.03064	-1.41649e-10	-1.06081e-10	-1.19185e-10
		0.03066	-1.41025e-10	-1.08577e-10	-1.17313e-10
		0.03068	-1.39777e-10	-1.09201e-10	-1.19809e-10
		0.0307	-1.39777e-10	-1.09825e-10	-1.21681e-10
		0.03072	-1.39777e-10	-1.06705e-10	-1.24177e-10
		0.03074	-1.40401e-10	-1.06081e-10	-1.24801e-10
		0.03076	-1.39777e-10	-1.04833e-10	-1.25425e-10
		0.03078	-1.41025e-10	-1.03585e-10	-1.23553e-10
		0.0308	-1.42897e-10	-1.02337e-10	-1.22305e-10
		0.03082	-1.44145e-10	-1.04209e-10	-1.19185e-10
		0.03084	-1.42273e-10	-1.04833e-10	-1.17313e-10
		0.03086	-1.43521e-10	-1.05457e-10	-1.15441e-10
		0.03088	-1.42273e-10	-1.06705e-10	-1.16689e-10
		0.0309	-1.41649e-10	-1.08577e-10	-1.17313e-10
		0.03092	-1.41025e-10	-1.09825e-10	-1.17937e-10
		0.03094	-1.40401e-10	-1.10449e-10	-1.18561e-10
		0.03096	-1.41649e-10	-1.11697e-10	-1.18561e-10
		0.03098	-1.42273e-10	-1.10449e-10	-1.20433e-10
		0.031	-1.42273e-10	-1.08577e-10	-1.21057e-10
		0.03102	-1.42273e-10	-1.07329e-10	-1.24801e-10
		0.03104	-1.42273e-10	-1.06081e-10	-1.24801e-10
		0.03106	-1.40401e-10	-1.06705e-10	-1.27297e-10
		0.03108	-1.40401e-10	-1.07329e-10	-1.27921e-10
		0.0311	-1.40401e-10	-1.07953e-10	-1.25425e-10
		0.03112	-1.37905e-10	-1.07953e-10	-1.25425e-10
		0.03114	-1.37905e-10	-1.09825e-10	-1.24801e-10
		0.03116	-1.36033e-10	-1.10449e-10	-1.23553e-10
		0.03118	-1.34161e-10	-1.07953e-10	-1.22929e-10
		0.0312	-1.33537e-10	-1.08577e-10	-1.21681e-10
		0.03122	-1.32289e-10	-1.08577e-10	-1.21057e-10
		0.03124	-1.34785e-10	-1.07329e-10	-1.21057e-10
		0.03126	-1.37281e-10	-1.07329e-10	-1.22305e-10
		0.03128	-1.39153e-10	-1.06081e-10	-1.21057e-10
		0.0313	-1.41025e-10	-1.07329e-10	-1.21681e-10
		0.03132	-1.41649e-10	-1.06705e-10	-1.21681e-10
		0.03134	-1.41649e-10	-1.08577e-10	-1.21681e-10
		0.03136	-1.41649e-10	-1.07953e-10	-1.22305e-10
		0.03138	-1.39777e-10	-1.09201e-10	-1.22929e-10
		0.0314	-1.38529e-10	-1.07953e-10	-1.24801e-10
		0.03142	-1.36657e-10	-1.09201e-10	-1.24801e-10
		0.03144	-1.34161e-10	-1.07953e-10	-1.24177e-10
		0.03146	-1.34785e-10	-1.07329e-10	-1.21681e-10
		0.03148	-1.33537e-10	-1.06705e-10	-1.21057e-10
		0.0315	-1.34161e-10	-1.05457e-10	-1.19809e-10
		0.03152	-1.37281e-10	-1.06081e-10	-1.18561e-10
		0.03154	-1.38529e-10	-1.05457e-10	-1.18561e-10
		0.03156	-1.37905e-10	-1.04209e-10	-1.19185e-10
		0.03158	-1.38529e-10	-1.05457e-10	-1.19185e-10
		0.0316	-1.40401e-10	-1.06705e-10	-1.17937e-10
		0.03162	-1.38529e-10	-1.07329e-10	-1.17313e-10
		0.03164	-1.39153e-10	-1.07953e-10	-1.16065e-10
		0.03166	-1.39153e-10	-1.06705e-10	-1.16065e-10
		0.03168	-1.36657e-10	-1.06081e-10	-1.18561e-10
		0.0317	-1.37905e-10	-1.03585e-10	-1.18561e-10
		0.03172	-1.37905e-10	-1.04209e-10	-1.21057e-10
		0.03174	-1.37281e-10	-1.03585e-10	-1.20433e-10
		0.03176	-1.37905e-10	-1.04209e-10	-1.20433e-10
		0.03178	-1.36657e-10	-1.04833e-10	-1.20433e-10
		0.0318	-1.37281e-10	-1.06705e-10	-1.19809e-10
		0.03182	-1.37281e-10	-1.04209e-10	-1.19185e-10
		0.03184	-1.39153e-10	-1.04209e-10	-1.19185e-10
		0.03186	-1.37905e-10	-1.04833e-10	-1.18561e-10
		0.03188	-1.37281e-10	-1.06081e-10	-1.19809e-10
		0.0319	-1.37281e-10	-1.07953e-10	-1.21057e-10
		0.03192	-1.36033e-10	-1.09825e-10	-1.23553e-10
		0.03194	-1.36033e-10	-1.11697e-10	-1.24177e-10
		0.03196	-1.36033e-10	-1.14193e-10	-1.21681e-10
		0.03198	-1.36033e-10	-1.12321e-10	-1.21681e-10
		0.032	-1.36657e-10	-1.09825e-10	-1.19185e-10
		0.03202	-1.34785e-10	-1.09825e-10	-1.16065e-10
		0.03204	-1.34161e-10	-1.09825e-10	-1.17937e-10
		0.03206	-1.31665e-10	-1.08577e-10	-1.19809e-10
		0.03208	-1.31665e-10	-1.09201e-10	-1.20433e-10
		0.0321	-1.34161e-10	-1.08577e-10	-1.21057e-10
		0.03212	-1.37281e-10	-1.09825e-10	-1.22305e-10
		0.03214	-1.38529e-10	-1.09201e-10	-1.22305e-10
		0.03216	-1.39153e-10	-1.08577e-10	-1.21681e-10
		0.03218	-1.39153e-10	-1.06705e-10	-1.19809e-10
		0.0322	-1.39777e-10	-1.06081e-10	-1.19185e-10
		0.03222	-1.37905e-10	-1.05457e-10	-1.18561e-10
		0.03224	-1.37281e-10	-1.04833e-10	-1.17937e-10
		0.03226	-1.37281e-10	-1.04833e-10	-1.19809e-10
		0.03228	-1.36033e-10	-1.05457e-10	-1.19809e-10
		0.0323	-1.35409e-10	-1.05457e-10	-1.20433e-10
		0.03232	-1.36033e-10	-1.05457e-10	-1.20433e-10
		0.03234	-1.35409e-10	-1.06705e-10	-1.21681e-10
		0.03236	-1.36033e-10	-1.06081e-10	-1.21681e-10
		0.03238	-1.34785e-10	-1.06705e-10	-1.22305e-10
		0.0324	-1.35409e-10	-1.07329e-10	-1.21681e-10
		0.03242	-1.36657e-10	-1.08577e-10	-1.21057e-10
		0.03244	-1.37281e-10	-1.07953e-10	-1.21681e-10
		0.03246	-1.37905e-10	-1.07953e-10	-1.20433e-10
		0.03248	-1.37905e-10	-1.07329e-10	-1.19185e-10
		0.0325	-1.37905e-10	-1.06705e-10	-1.21057e-10
		0.03252	-1.36657e-10	-1.06705e-10	-1.22305e-10
		0.03254	-1.36657e-10	-1.05457e-10	-1.23553e-10
		0.03256	-1.36657e-10	-1.04209e-10	-1.24801e-10
		0.03258	-1.35409e-10	-1.04209e-10	-1.24801e-10
		0.0326	-1.35409e-10	-1.04833e-10	-1.25425e-10
		0.03262	-1.35409e-10	-1.04833e-10	-1.22929e-10
		0.03264	-1.36657e-10	-1.06081e-10	-1.21681e-10
		0.03266	-1.37905e-10	-1.05457e-10	-1.19809e-10
		0.03268	-1.35409e-10	-1.06705e-10	-1.18561e-10
		0.0327	-1.35409e-10	-1.07953e-10	-1.17937e-10
		0.03272	-1.34785e-10	-1.07329e-10	-1.18561e-10
		0.03274	-1.36657e-10	-1.08577e-10	-1.17313e-10
		0.03276	-1.35409e-10	-1.08577e-10	-1.17937e-10
		0.03278	-1.35409e-10	-1.09201e-10	-1.17937e-10
		0.0328	-1.36033e-10	-1.06081e-10	-1.19809e-10
		0.03282	-1.36657e-10	-1.05457e-10	-1.21681e-10
		0.03284	-1.37281e-10	-1.02961e-10	-1.21057e-10
		0.03286	-1.38529e-10	-1.03585e-10	-1.22305e-10
		0.03288	-1.39777e-10	-1.05457e-10	-1.20433e-10
		0.0329	-1.41025e-10	-1.06705e-10	-1.19809e-10
		0.03292	-1.39777e-10	-1.07329e-10	-1.18561e-10
		0.03294	-1.38529e-10	-1.09825e-10	-1.17313e-10
		0.03296	-1.39777e-10	-1.09825e-10	-1.16689e-10
		0.03298	-1.37905e-10	-1.07329e-10	-1.16065e-10
		0.033	-1.36033e-10	-1.06705e-10	-1.14193e-10
		0.03302	-1.34785e-10	-1.06081e-10	-1.14193e-10
		0.03304	-1.33537e-10	-1.04833e-10	-1.14817e-10
		0.03306	-1.34161e-10	-1.02337e-10	-1.16689e-10
		0.03308	-1.34161e-10	-1.05457e-10	-1.17313e-10
		0.0331	-1.34785e-10	-1.06081e-10	-1.21681e-10
		0.03312	-1.36657e-10	-1.07329e-10	-1.24801e-10
		0.03314	-1.38529e-10	-1.08577e-10	-1.24177e-10
		0.03316	-1.39153e-10	-1.07329e-10	-1.25425e-10
		0.03318	-1.38529e-10	-1.08577e-10	-1.24177e-10
		0.0332	-1.38529e-10	-1.07329e-10	-1.22929e-10
		0.03322	-1.39777e-10	-1.07329e-10	-1.21681e-10
		0.03324	-1.38529e-10	-1.06705e-10	-1.22305e-10
		0.03326	-1.35409e-10	-1.05457e-10	-1.22305e-10
		0.03328	-1.34785e-10	-1.05457e-10	-1.21681e-10
		0.0333	-1.36657e-10	-1.03585e-10	-1.22305e-10
		0.03332	-1.37281e-10	-1.03585e-10	-1.23553e-10
		0.03334	-1.37281e-10	-1.03585e-10	-1.22305e-10
		0.03336	-1.38529e-10	-1.03585e-10	-1.23553e-10
		0.03338	-1.37281e-10	-1.04209e-10	-1.21681e-10
		0.0334	-1.39153e-10	-1.03585e-10	-1.21681e-10
		0.03342	-1.35409e-10	-1.04833e-10	-1.21057e-10
		0.03344	-1.34785e-10	-1.05457e-10	-1.21681e-10
		0.03346	-1.34785e-10	-1.06081e-10	-1.21057e-10
		0.03348	-1.36657e-10	-1.07953e-10	-1.21057e-10
		0.0335	-1.36033e-10	-1.06081e-10	-1.20433e-10
		0.03352	-1.37905e-10	-1.06081e-10	-1.19185e-10
		0.03354	-1.36657e-10	-1.04209e-10	-1.17937e-10
		0.03356	-1.35409e-10	-1.03585e-10	-1.17313e-10
		0.03358	-1.37905e-10	-1.01713e-10	-1.17313e-10
		0.0336	-1.36657e-10	-1.03585e-10	-1.17313e-10
		0.03362	-1.37281e-10	-1.04833e-10	-1.20433e-10
		0.03364	-1.36033e-10	-1.04833e-10	-1.21057e-10
		0.03366	-1.36033e-10	-1.05457e-10	-1.22305e-10
		0.03368	-1.35409e-10	-1.06081e-10	-1.23553e-10
		0.0337	-1.35409e-10	-1.06705e-10	-1.23553e-10
		0.03372	-1.36033e-10	-1.07329e-10	-1.21681e-10
		0.03374	-1.36033e-10	-1.07953e-10	-1.21681e-10
		0.03376	-1.37905e-10	-1.07953e-10	-1.21057e-10
		0.03378	-1.36033e-10	-1.07953e-10	-1.21681e-10
		0.0338	-1.37281e-10	-1.07329e-10	-1.20433e-10
		0.03382	-1.37281e-10	-1.07329e-10	-1.20433e-10
		0.03384	-1.38529e-10	-1.06081e-10	-1.19185e-10
		0.03386	-1.37281e-10	-1.05457e-10	-1.18561e-10
		0.03388	-1.37281e-10	-1.04833e-10	-1.19185e-10
		0.0339	-1.37281e-10	-1.04209e-10	-1.19809e-10
		0.03392	-1.38529e-10	-1.04209e-10	-1.19809e-10
		0.03394	-1.39153e-10	-1.06081e-10	-1.21057e-10
		0.03396	-1.40401e-10	-1.06081e-10	-1.19809e-10
		0.03398	-1.39777e-10	-1.06081e-10	-1.19809e-10
		0.034	-1.40401e-10	-1.06081e-10	-1.18561e-10
		0.03402	-1.37905e-10	-1.07953e-10	-1.19185e-10
		0.03404	-1.37905e-10	-1.06081e-10	-1.19809e-10
		0.03406	-1.37281e-10	-1.06081e-10	-1.19809e-10
		0.03408	-1.36033e-10	-1.06081e-10	-1.19185e-10
		0.0341	-1.36033e-10	-1.06081e-10	-1.18561e-10
		0.03412	-1.36033e-10	-1.04209e-10	-1.19809e-10
		0.03414	-1.36033e-10	-1.05457e-10	-1.16689e-10
		0.03416	-1.36033e-10	-1.02961e-10	-1.16689e-10
		0.03418	-1.36033e-10	-1.04209e-10	-1.17313e-10
		0.0342	-1.34161e-10	-1.03585e-10	-1.18561e-10
		0.03422	-1.32913e-10	-1.04209e-10	-1.19185e-10
		0.03424	-1.33537e-10	-1.05457e-10	-1.18561e-10
		0.03426	-1.32913e-10	-1.06081e-10	-1.19185e-10
		0.03428	-1.31041e-10	-1.07953e-10	-1.20433e-10
		0.0343	-1.31041e-10	-1.07953e-10	-1.21681e-10
		0.03432	-1.33537e-10	-1.07953e-10	-1.21681e-10
		0.03434	-1.33537e-10	-1.06705e-10	-1.21057e-10
		0.03436	-1.34785e-10	-1.07329e-10	-1.21057e-10
		0.03438	-1.34785e-10	-1.05457e-10	-1.20433e-10
		0.0344	-1.34785e-10	-1.04833e-10	-1.19809e-10
		0.03442	-1.32913e-10	-1.05457e-10	-1.20433e-10
		0.03444	-1.33537e-10	-1.05457e-10	-1.18561e-10
		0.03446	-1.32289e-10	-1.07329e-10	-1.17937e-10
		0.03448	-1.35409e-10	-1.07329e-10	-1.16689e-10
		0.0345	-1.37281e-10	-1.06705e-10	-1.17313e-10
		0.03452	-1.37281e-10	-1.06705e-10	-1.17313e-10
		0.03454	-1.38529e-10	-1.05457e-10	-1.18561e-10
		0.03456	-1.41025e-10	-1.05457e-10	-1.20433e-10
		0.03458	-1.40401e-10	-1.05457e-10	-1.21681e-10
		0.0346	-1.41025e-10	-1.06705e-10	-1.21681e-10
		0.03462	-1.40401e-10	-1.07329e-10	-1.22929e-10
		0.03464	-1.40401e-10	-1.09201e-10	-1.23553e-10
		0.03466	-1.39153e-10	-1.09201e-10	-1.26049e-10
		0.03468	-1.37905e-10	-1.08577e-10	-1.25425e-10
		0.0347	-1.37281e-10	-1.08577e-10	-1.24177e-10
		0.03472	-1.39153e-10	-1.07953e-10	-1.22929e-10
		0.03474	-1.39777e-10	-1.09201e-10	-1.22305e-10
		0.03476	-1.39777e-10	-1.07329e-10	-1.24177e-10
		0.03478	-1.40401e-10	-1.11073e-10	-1.24177e-10
		0.0348	-1.39153e-10	-1.11073e-10	-1.23553e-10
		0.03482	-1.37281e-10	-1.09201e-10	-1.24177e-10
		0.03484	-1.36033e-10	-1.09201e-10	-1.22305e-10
		0.03486	-1.36033e-10	-1.07329e-10	-1.22305e-10
		0.03488	-1.32913e-10	-1.04209e-10	-1.20433e-10
		0.0349	-1.32913e-10	-1.02961e-10	-1.19185e-10
		0.03492	-1.32289e-10	-1.04209e-10	-1.18561e-10
		0.03494	-1.34785e-10	-1.04833e-10	-1.17937e-10
		0.03496	-1.36033e-10	-1.04833e-10	-1.20433e-10
		0.03498	-1.36033e-10	-1.06705e-10	-1.21681e-10
		0.035	-1.36033e-10	-1.06705e-10	-1.20433e-10
		0.03502	-1.35409e-10	-1.04833e-10	-1.20433e-10
		0.03504	-1.36657e-10	-1.06081e-10	-1.18561e-10
		0.03506	-1.36033e-10	-1.04833e-10	-1.19809e-10
		0.03508	-1.37281e-10	-1.05457e-10	-1.21681e-10
		0.0351	-1.39153e-10	-1.05457e-10	-1.22305e-10
		0.03512	-1.39777e-10	-1.03585e-10	-1.24177e-10
		0.03514	-1.39777e-10	-1.04833e-10	-1.26049e-10
		0.03516	-1.39777e-10	-1.04209e-10	-1.28545e-10
		0.03518	-1.41025e-10	-1.04833e-10	-1.27921e-10
		0.0352	-1.41649e-10	-1.06081e-10	-1.26673e-10
		0.03522	-1.39153e-10	-1.06081e-10	-1.26049e-10
		0.03524	-1.39153e-10	-1.05457e-10	-1.24801e-10
		0.03526	-1.36657e-10	-1.05457e-10	-1.21681e-10
		0.03528	-1.34785e-10	-1.04209e-10	-1.21057e-10
		0.0353	-1.34785e-10	-1.04833e-10	-1.20433e-10
		0.03532	-1.35409e-10	-1.04209e-10	-1.21681e-10
		0.03534	-1.36033e-10	-1.03585e-10	-1.22929e-10
		0.03536	-1.34785e-10	-1.02337e-10	-1.25425e-10
		0.03538	-1.36033e-10	-1.03585e-10	-1.24177e-10
		0.0354	-1.36657e-10	-1.04833e-10	-1.24801e-10
		0.03542	-1.35409e-10	-1.04833e-10	-1.26673e-10
		0.03544	-1.36033e-10	-1.06081e-10	-1.25425e-10
		0.03546	-1.36657e-10	-1.06705e-10	-1.25425e-10
		0.03548	-1.35409e-10	-1.07953e-10	-1.22929e-10
		0.0355	-1.36657e-10	-1.07329e-10	-1.22305e-10
		0.03552	-1.36033e-10	-1.07329e-10	-1.20433e-10
		0.03554	-1.37905e-10	-1.06705e-10	-1.20433e-10
		0.03556	-1.39777e-10	-1.03585e-10	-1.19185e-10
		0.03558	-1.41649e-10	-1.02337e-10	-1.18561e-10
		0.0356	-1.42273e-10	-1.01713e-10	-1.18561e-10
		0.03562	-1.43521e-10	-1.01713e-10	-1.19185e-10
		0.03564	-1.42273e-10	-1.02961e-10	-1.21057e-10
		0.03566	-1.41649e-10	-1.03585e-10	-1.21681e-10
		0.03568	-1.40401e-10	-1.04833e-10	-1.22305e-10
		0.0357	-1.38529e-10	-1.04833e-10	-1.23553e-10
		0.03572	-1.37905e-10	-1.07329e-10	-1.21681e-10
		0.03574	-1.36657e-10	-1.08577e-10	-1.21681e-10
		0.03576	-1.35409e-10	-1.06705e-10	-1.20433e-10
		0.03578	-1.34161e-10	-1.06081e-10	-1.20433e-10
		0.0358	-1.34785e-10	-1.04833e-10	-1.19809e-10
		0.03582	-1.34161e-10	-1.04833e-10	-1.20433e-10
		0.03584	-1.34785e-10	-1.04833e-10	-1.22305e-10
		0.03586	-1.35409e-10	-1.04833e-10	-1.23553e-10
		0.03588	-1.36033e-10	-1.06081e-10	-1.24801e-10
		0.0359	-1.36657e-10	-1.07329e-10	-1.23553e-10
		0.03592	-1.36033e-10	-1.08577e-10	-1.22305e-10
		0.03594	-1.37281e-10	-1.06081e-10	-1.22305e-10
		0.03596	-1.38529e-10	-1.07953e-10	-1.21681e-10
		0.03598	-1.39777e-10	-1.06705e-10	-1.24177e-10
		0.036	-1.39777e-10	-1.05457e-10	-1.24801e-10
		0.03602	-1.40401e-10	-1.04833e-10	-1.25425e-10
		0.03604	-1.41025e-10	-1.04209e-10	-1.22929e-10
		0.03606	-1.40401e-10	-1.03585e-10	-1.19809e-10
		0.03608	-1.39777e-10	-1.04209e-10	-1.18561e-10
		0.0361	-1.37281e-10	-1.04833e-10	-1.18561e-10
		0.03612	-1.37281e-10	-1.04833e-10	-1.18561e-10
		0.03614	-1.34785e-10	-1.06081e-10	-1.20433e-10
		0.03616	-1.32289e-10	-1.06705e-10	-1.21681e-10
		0.03618	-1.32289e-10	-1.07329e-10	-1.20433e-10
		0.0362	-1.33537e-10	-1.07329e-10	-1.19809e-10
		0.03622	-1.36033e-10	-1.07953e-10	-1.18561e-10
		0.03624	-1.37281e-10	-1.08577e-10	-1.17937e-10
		0.03626	-1.39777e-10	-1.07953e-10	-1.17313e-10
		0.03628	-1.42273e-10	-1.07329e-10	-1.18561e-10
		0.0363	-1.43521e-10	-1.06705e-10	-1.19809e-10
		0.03632	-1.43521e-10	-1.05457e-10	-1.22929e-10
		0.03634	-1.43521e-10	-1.04209e-10	-1.24801e-10
		0.03636	-1.42897e-10	-1.06081e-10	-1.26049e-10
		0.03638	-1.42273e-10	-1.05457e-10	-1.25425e-10
		0.0364	-1.41025e-10	-1.05457e-10	-1.22929e-10
		0.03642	-1.41649e-10	-1.06081e-10	-1.22929e-10
		0.03644	-1.39777e-10	-1.04833e-10	-1.21681e-10
		0.03646	-1.39153e-10	-1.07953e-10	-1.21681e-10
		0.03648	-1.37281e-10	-1.06705e-10	-1.22305e-10
		0.0365	-1.36657e-10	-1.07953e-10	-1.22305e-10
		0.03652	-1.38529e-10	-1.07329e-10	-1.21681e-10
		0.03654	-1.38529e-10	-1.07329e-10	-1.22305e-10
		0.03656	-1.38529e-10	-1.07953e-10	-1.22305e-10
		0.03658	-1.40401e-10	-1.08577e-10	-1.20433e-10
		0.0366	-1.41025e-10	-1.07329e-10	-1.21681e-10
		0.03662	-1.39153e-10	-1.08577e-10	-1.20433e-10
		0.03664	-1.39153e-10	-1.07953e-10	-1.21681e-10
		0.03666	-1.37905e-10	-1.07329e-10	-1.23553e-10
		0.03668	-1.36657e-10	-1.07329e-10	-1.24177e-10
		0.0367	-1.34785e-10	-1.07329e-10	-1.23553e-10
		0.03672	-1.34161e-10	-1.07329e-10	-1.23553e-10
		0.03674	-1.34785e-10	-1.07953e-10	-1.22305e-10
		0.03676	-1.37905e-10	-1.07329e-10	-1.21057e-10
		0.03678	-1.38529e-10	-1.07329e-10	-1.21681e-10
		0.0368	-1.42273e-10	-1.08577e-10	-1.22305e-10
		0.03682	-1.40401e-10	-1.07329e-10	-1.25425e-10
		0.03684	-1.42273e-10	-1.07953e-10	-1.24801e-10
		0.03686	-1.42273e-10	-1.06705e-10	-1.23553e-10
		0.03688	-1.39777e-10	-1.07329e-10	-1.23553e-10
		0.0369	-1.39153e-10	-1.06081e-10	-1.21057e-10
		0.03692	-1.39153e-10	-1.06705e-10	-1.20433e-10
		0.03694	-1.37281e-10	-1.06705e-10	-1.20433e-10
		0.03696	-1.37281e-10	-1.08577e-10	-1.19809e-10
		0.03698	-1.36033e-10	-1.07329e-10	-1.20433e-10
		0.037	-1.35409e-10	-1.07329e-10	-1.20433e-10
		0.03702	-1.36657e-10	-1.05457e-10	-1.20433e-10
		0.03704	-1.35409e-10	-1.04833e-10	-1.20433e-10
		0.03706	-1.36657e-10	-1.05457e-10	-1.19185e-10
		0.03708	-1.34785e-10	-1.04209e-10	-1.20433e-10
		0.0371	-1.34785e-10	-1.06705e-10	-1.23553e-10
		0.03712	-1.34161e-10	-1.07329e-10	-1.21057e-10
		0.03714	-1.31665e-10	-1.07953e-10	-1.24177e-10
		0.03716	-1.32289e-10	-1.09201e-10	-1.23553e-10
		0.03718	-1.34785e-10	-1.08577e-10	-1.23553e-10
		0.0372	-1.37281e-10	-1.09201e-10	-1.20433e-10
		0.03722	-1.37281e-10	-1.08577e-10	-1.19809e-10
		0.03724	-1.38529e-10	-1.08577e-10	-1.17937e-10
		0.03726	-1.39153e-10	-1.08577e-10	-1.17313e-10
		0.03728	-1.39777e-10	-1.07953e-10	-1.17937e-10
		0.0373	-1.38529e-10	-1.07329e-10	-1.19185e-10
		0.03732	-1.39153e-10	-1.07329e-10	-1.20433e-10
		0.03734	-1.36657e-10	-1.06705e-10	-1.22929e-10
		0.03736	-1.36033e-10	-1.06705e-10	-1.24177e-10
		0.03738	-1.37281e-10	-1.06081e-10	-1.24801e-10
		0.0374	-1.38529e-10	-1.07329e-10	-1.24177e-10
		0.03742	-1.39777e-10	-1.08577e-10	-1.24801e-10
		0.03744	-1.39777e-10	-1.08577e-10	-1.22929e-10
		0.03746	-1.40401e-10	-1.10449e-10	-1.22929e-10
		0.03748	-1.38529e-10	-1.10449e-10	-1.24177e-10
		0.0375	-1.37281e-10	-1.07953e-10	-1.24177e-10
		0.03752	-1.37905e-10	-1.07329e-10	-1.23553e-10
		0.03754	-1.37905e-10	-1.06705e-10	-1.23553e-10
		0.03756	-1.39153e-10	-1.06705e-10	-1.24177e-10
		0.03758	-1.37905e-10	-1.06081e-10	-1.21681e-10
		0.0376	-1.38529e-10	-1.04833e-10	-1.21057e-10
		0.03762	-1.37281e-10	-1.04833e-10	-1.21681e-10
		0.03764	-1.36033e-10	-1.04833e-10	-1.21057e-10
		0.03766	-1.37905e-10	-1.06081e-10	-1.19185e-10
		0.03768	-1.39153e-10	-1.06081e-10	-1.19809e-10
		0.0377	-1.39153e-10	-1.07329e-10	-1.19809e-10
		0.03772	-1.40401e-10	-1.09825e-10	-1.21681e-10
		0.03774	-1.41025e-10	-1.08577e-10	-1.22305e-10
		0.03776	-1.42273e-10	-1.11073e-10	-1.22305e-10
		0.03778	-1.40401e-10	-1.07953e-10	-1.22929e-10
		0.0378	-1.37905e-10	-1.06705e-10	-1.24177e-10
		0.03782	-1.35409e-10	-1.06705e-10	-1.25425e-10
		0.03784	-1.34161e-10	-1.06081e-10	-1.25425e-10
		0.03786	-1.34161e-10	-1.07329e-10	-1.23553e-10
		0.03788	-1.35409e-10	-1.07953e-10	-1.21681e-10
		0.0379	-1.37281e-10	-1.07953e-10	-1.20433e-10
		0.03792	-1.39777e-10	-1.08577e-10	-1.18561e-10
		0.03794	-1.37281e-10	-1.11697e-10	-1.18561e-10
		0.03796	-1.38529e-10	-1.12945e-10	-1.18561e-10
		0.03798	-1.37281e-10	-1.12945e-10	-1.19809e-10
		0.038	-1.35409e-10	-1.11073e-10	-1.23553e-10
		0.03802	-1.36657e-10	-1.09825e-10	-1.24177e-10
		0.03804	-1.37281e-10	-1.11073e-10	-1.25425e-10
		0.03806	-1.37281e-10	-1.08577e-10	-1.26049e-10
		0.03808	-1.37905e-10	-1.09201e-10	-1.24801e-10
		0.0381	-1.39153e-10	-1.07329e-10	-1.26049e-10
		0.03812	-1.39153e-10	-1.06705e-10	-1.22929e-10
		0.03814	-1.37905e-10	-1.06081e-10	-1.24177e-10
		0.03816	-1.37281e-10	-1.06081e-10	-1.24801e-10
		0.03818	-1.35409e-10	-1.07953e-10	-1.24177e-10
		0.0382	-1.35409e-10	-1.07329e-10	-1.23553e-10
		0.03822	-1.34785e-10	-1.07329e-10	-1.22929e-10
		0.03824	-1.34161e-10	-1.07953e-10	-1.22929e-10
		0.03826	-1.37905e-10	-1.09825e-10	-1.20433e-10
		0.03828	-1.39153e-10	-1.10449e-10	-1.21057e-10
		0.0383	-1.42273e-10	-1.10449e-10	-1.22305e-10
		0.03832	-1.43521e-10	-1.11073e-10	-1.22305e-10
		0.03834	-1.43521e-10	-1.11073e-10	-1.22305e-10
		0.03836	-1.44145e-10	-1.09825e-10	-1.21681e-10
		0.03838	-1.43521e-10	-1.08577e-10	-1.19185e-10
		0.0384	-1.41649e-10	-1.06705e-10	-1.19185e-10
		0.03842	-1.42897e-10	-1.06081e-10	-1.17313e-10
		0.03844	-1.41025e-10	-1.04833e-10	-1.17937e-10
		0.03846	-1.39777e-10	-1.06081e-10	-1.19185e-10
		0.03848	-1.37905e-10	-1.05457e-10	-1.22305e-10
		0.0385	-1.37905e-10	-1.05457e-10	-1.23553e-10
		0.03852	-1.37905e-10	-1.06081e-10	-1.24801e-10
		0.03854	-1.37905e-10	-1.07329e-10	-1.25425e-10
		0.03856	-1.36657e-10	-1.08577e-10	-1.23553e-10
		0.03858	-1.39153e-10	-1.07329e-10	-1.22305e-10
		0.0386	-1.39777e-10	-1.07953e-10	-1.21681e-10
		0.03862	-1.39777e-10	-1.08577e-10	-1.22305e-10
		0.03864	-1.39777e-10	-1.07953e-10	-1.22305e-10
		0.03866	-1.40401e-10	-1.07953e-10	-1.23553e-10
		0.03868	-1.40401e-10	-1.08577e-10	-1.25425e-10
		0.0387	-1.39777e-10	-1.06705e-10	-1.26049e-10
		0.03872	-1.39777e-10	-1.05457e-10	-1.24801e-10
		0.03874	-1.39777e-10	-1.04209e-10	-1.24801e-10
		0.03876	-1.36033e-10	-1.03585e-10	-1.22305e-10
		0.03878	-1.36033e-10	-1.02961e-10	-1.19809e-10
		0.0388	-1.34785e-10	-1.03585e-10	-1.19185e-10
		0.03882	-1.36033e-10	-1.04833e-10	-1.19185e-10
		0.03884	-1.36657e-10	-1.04833e-10	-1.20433e-10
		0.03886	-1.37905e-10	-1.04209e-10	-1.21681e-10
		0.03888	-1.39777e-10	-1.04209e-10	-1.22305e-10
		0.0389	-1.39153e-10	-1.06081e-10	-1.19809e-10
		0.03892	-1.37905e-10	-1.06705e-10	-1.19809e-10
		0.03894	-1.37281e-10	-1.07329e-10	-1.18561e-10
		0.03896	-1.35409e-10	-1.07953e-10	-1.22305e-10
		0.03898	-1.35409e-10	-1.09201e-10	-1.21681e-10
		0.039	-1.32913e-10	-1.07953e-10	-1.23553e-10
		0.03902	-1.32289e-10	-1.07329e-10	-1.24177e-10
		0.03904	-1.34161e-10	-1.06705e-10	-1.24801e-10
		0.03906	-1.34785e-10	-1.05457e-10	-1.22305e-10
		0.03908	-1.36657e-10	-1.05457e-10	-1.24177e-10
		0.0391	-1.39777e-10	-1.05457e-10	-1.21057e-10
		0.03912	-1.40401e-10	-1.04833e-10	-1.19809e-10
		0.03914	-1.39777e-10	-1.05457e-10	-1.19185e-10
		0.03916	-1.39153e-10	-1.06081e-10	-1.19185e-10
		0.03918	-1.37905e-10	-1.06705e-10	-1.20433e-10
		0.0392	-1.34785e-10	-1.06705e-10	-1.22929e-10
		0.03922	-1.36033e-10	-1.07329e-10	-1.25425e-10
		0.03924	-1.35409e-10	-1.06705e-10	-1.24177e-10
		0.03926	-1.36657e-10	-1.06081e-10	-1.22929e-10
		0.03928	-1.37905e-10	-1.04833e-10	-1.21681e-10
		0.0393	-1.37905e-10	-1.04209e-10	-1.21057e-10
		0.03932	-1.36657e-10	-1.03585e-10	-1.19185e-10
		0.03934	-1.34785e-10	-1.03585e-10	-1.20433e-10
		0.03936	-1.34161e-10	-1.03585e-10	-1.18561e-10
		0.03938	-1.34785e-10	-1.02337e-10	-1.20433e-10
		0.0394	-1.34785e-10	-1.05457e-10	-1.19185e-10
		0.03942	-1.35409e-10	-1.07953e-10	-1.18561e-10
		0.03944	-1.36657e-10	-1.07953e-10	-1.18561e-10
		0.03946	-1.37281e-10	-1.07953e-10	-1.19809e-10
		0.03948	-1.37905e-10	-1.07953e-10	-1.21057e-10
		0.0395	-1.38529e-10	-1.08577e-10	-1.19809e-10
		0.03952	-1.37905e-10	-1.09825e-10	-1.19809e-10
		0.03954	-1.38529e-10	-1.09201e-10	-1.18561e-10
		0.03956	-1.37905e-10	-1.08577e-10	-1.19185e-10
		0.03958	-1.39153e-10	-1.08577e-10	-1.19185e-10
		0.0396	-1.39777e-10	-1.06705e-10	-1.19809e-10
		0.03962	-1.39153e-10	-1.07329e-10	-1.19809e-10
		0.03964	-1.39153e-10	-1.05457e-10	-1.20433e-10
		0.03966	-1.37905e-10	-1.04833e-10	-1.21057e-10
		0.03968	-1.39153e-10	-1.06705e-10	-1.22305e-10
		0.0397	-1.38529e-10	-1.07329e-10	-1.21681e-10
		0.03972	-1.40401e-10	-1.07329e-10	-1.22929e-10
		0.03974	-1.41649e-10	-1.07953e-10	-1.22305e-10
		0.03976	-1.41649e-10	-1.07329e-10	-1.23553e-10
		0.03978	-1.41649e-10	-1.07953e-10	-1.23553e-10
		0.0398	-1.41649e-10	-1.07329e-10	-1.23553e-10
		0.03982	-1.39777e-10	-1.07329e-10	-1.23553e-10
		0.03984	-1.40401e-10	-1.06081e-10	-1.22929e-10
		0.03986	-1.37905e-10	-1.05457e-10	-1.22305e-10
		0.03988	-1.39153e-10	-1.06705e-10	-1.21057e-10
		0.0399	-1.39153e-10	-1.04209e-10	-1.21057e-10
		0.03992	-1.39153e-10	-1.07329e-10	-1.21057e-10
[truncated: 23,303 more rows]
