# Supplementary material for: Physiological roles of endocytosis and presynaptic scaffold in vesicle replenishment at fast and slow central synapses
Source: eLife. 2024 Jun 3;12:RP90497. doi: 10.7554/eLife.90497 (PMC11147502; doi:10.7554/eLife.90497)
Supplement: Figure 3—source data 1. [file elife-90497-fig3-data1.xlsx]

## Sheet: 5 ms
		Figure 3A_Cm traces									Figure 3A_endo Rate_bar graph data
		Time (S)	Control		ML141		Latrunculin-B					Control	ML141	Latrunculin-B
			Mean	SEM	Mean	SEM	Mean	SEM			Mean	2.88e-14	2.3e-14	2.56e-14
											SEM	3.74e-15	5.78e-15	5.22e-15
		0.01	3.69561e-15	2.02e-15	4.4363e-15	2.96799e-15	4.74152e-15	4.7921e-15			n number	5	6	6
		0.03	4.29561e-15	2.81758e-15	4.47421e-15	7.56437e-15	5.41355e-15	5.88901e-15			p-value	-	0.44	0.65
		0.05	3.12053e-15	5.09215e-15	6.30422e-15	7.79415e-15	4.33408e-15	7.24069e-15
		0.07	6.288e-15	2.91106e-15	-4.71535e-15	4.88895e-15	5.8603e-15	4.9921e-15
		0.09	4.69561e-15	6.46283e-15	1.35685e-15	4.36073e-15	5.10898e-15	6.04301e-15
		0.11	2.14064e-15	1.78873e-15	3.0852e-15	6.6621e-15	5.54883e-15	5.29356e-15
		0.13	8.35792e-16	2.96105e-15	6.08877e-15	5.7736e-15	4.54152e-15	5.19586e-15
		0.15	1.13062e-14	5.7729e-15	3.91627e-15	5.97406e-15	6.33902e-15	4.7301e-15
		0.17	1.71711e-15	2.20131e-15	9.53638e-15	7.19314e-15	5.67785e-15	2.81191e-15
		0.19	3.03695e-15	3.44063e-15	2.00271e-15	7.25196e-15	1.23434e-14	4.22271e-15
		0.21	6.28124e-15	3.95862e-15	1.19275e-15	6.52193e-15	5.37671e-15	3.5429e-15
		0.23	5.47702e-15	5.77504e-15	2.28009e-15	5.87475e-15	7.62318e-15	4.29109e-15
		0.25	1.21096e-15	5.41042e-15	4.8363e-15	6.19639e-15	4.36574e-15	2.50751e-15
		0.27	5.1258e-15	4.64414e-15	6.47421e-15	6.22248e-15	7.51194e-15	3.19869e-15
		0.29	3.88267e-15	2.77392e-15	4.77329e-15	7.36605e-15	5.37517e-15	3.50724e-15
		0.31	-4.96931e-16	2.66682e-15	6.77771e-15	8.33079e-15	6.8427e-15	2.41292e-15
		0.33	3.59961e-16	2.43492e-15	6.27388e-15	8.40741e-15	3.31829e-15	3.99809e-15
		0.35	1.21728e-15	1.20959e-15	6.44811e-15	7.86723e-15	5.85202e-15	2.7099e-15
		0.37	5.54559e-15	3.74583e-15	9.48558e-15	8.67666e-15	6.85092e-15	3.8881e-15
		0.39	3.48409e-15	3.59272e-15	1.23325e-14	8.30061e-15	9.62578e-15	3.16714e-15
		0.41	3.15305e-15	2.62696e-15	9.1889e-15	6.83978e-15	1.61469e-15	3.1595e-15
		0.43	1.28703e-16	2.65634e-15	8.21165e-15	7.90375e-15	8.05666e-15	1.89196e-15
		0.45	1.8004e-15	2.53463e-15	1.37869e-14	8.79989e-15	6.33974e-15	1.08708e-15
		0.47	-5.29781e-15	2.85381e-15	7.84253e-15	6.96916e-15	6.63598e-15	1.38229e-15
		0.49	-3.69603e-15	4.865e-15	1.11298e-14	7.65826e-15	9.92841e-15	1.91777e-15
		0.51	-5.18473e-15	2.08312e-15	9.84758e-15	6.71506e-15	1.67943e-15	2.04369e-15
		0.53	2.07776e-15	4.70917e-15	1.09445e-14	8.69633e-15	5.37928e-15	1.96708e-15
		0.55	5.86804e-15	5.14443e-15	1.1605e-14	7.36207e-15	4.57406e-15	2.87661e-15
		0.57	1.42373e-15	5.06745e-15	1.20812e-14	5.41401e-15	6.65957e-15	2.53627e-15
		0.59	6.33629e-15	5.75184e-15	7.31716e-15	6.11795e-15	6.97474e-16	3.60884e-15
		0.61	1.10792e-15	3.72689e-15	1.2626e-14	7.14766e-15	4.26059e-15	2.32382e-15
		0.63	-7.08884e-16	7.12404e-15	5.79667e-15	5.12753e-15	3.01477e-15	2.95482e-15
		0.65	3.68041e-16	5.21e-15	9.01999e-15	8.00565e-15	-3.51272e-15	2.2332e-15
		0.67	1.59533e-15	4.17039e-15	9.17788e-15	6.18754e-15	1.67574e-16	1.59114e-15
		0.69	-9.76595e-18	5.90574e-15	4.53048e-15	6.16037e-15	3.27087e-15	2.32995e-15
		0.71	-9.96999e-15	1.01427e-14	1.01711e-14	7.30669e-15	1.28274e-15	2.95535e-15
		0.73	-5.83393e-15	5.31267e-15	1.19506e-14	8.5222e-15	-2.36793e-15	3.51576e-15
		0.75	-3.79518e-15	4.30625e-15	1.22694e-14	7.89388e-15	3.83559e-16	2.20935e-15
		0.77	-1.52907e-15	5.51254e-15	5.29447e-15	5.63546e-15	-3.10743e-16	3.84469e-15
		0.79	-5.30136e-15	3.02407e-15	1.5422e-14	9.18287e-15	2.05174e-15	4.97523e-15
		0.81	-1.04909e-14	7.2789e-15	1.57797e-14	8.34022e-15	3.01386e-15	6.50312e-15
		0.83	-2.36546e-15	3.92254e-15	1.18791e-14	9.29996e-15	2.06219e-15	3.36199e-15
		0.85	-9.33443e-15	5.18535e-15	8.08628e-15	7.28733e-15	8.52688e-16	3.83356e-15
		0.87	-6.79e-15	3.77764e-15	8.9289e-15	7.16317e-15	3.93259e-15	4.28704e-15
		0.89	-4.74819e-15	9.83627e-15	8.264e-15	8.21267e-15	1.09413e-15	4.00036e-15
		0.91	-4.51849e-16	2.73946e-15	9.23161e-15	7.62954e-15	4.0837e-16	3.81702e-15
		0.93	-9.56318e-15	8.4529e-15	7.62032e-15	7.27993e-15	7.17399e-15	5.06864e-15
		0.95	-4.33321e-15	6.76886e-15	7.22263e-15	4.75417e-15	1.37383e-15	5.03554e-15
		0.97	-5.9724e-15	8.92324e-15	9.98534e-15	7.3796e-15	1.66836e-15	5.0322e-15
		0.99	-3.9698e-15	5.22282e-15	9.82951e-15	7.26671e-15	3.88581e-15	6.66091e-15
		1.01	-3.83358e-15	6.67206e-15	1.08692e-14	4.93622e-15	-3.01368e-16	5.71972e-15
		1.03	-5.83684e-15	3.60938e-15	8.23921e-15	6.45794e-15	1.41742e-15	4.58101e-15
		1.05	-8.79915e-15	6.66254e-15	4.74202e-15	6.43812e-15	1.5675e-15	4.28381e-15
		1.07	-3.39494e-15	2.53236e-15	1.01257e-14	4.74007e-15	3.59835e-15	4.89347e-15
		1.09	-5.71326e-15	6.97153e-15	5.13872e-15	5.69949e-15	7.96866e-15	5.09101e-15
		1.11	-8.07912e-15	5.66508e-15	7.71936e-15	5.28687e-15	1.34594e-16	1.89127e-15
		1.13	-5.83699e-15	5.79186e-15	8.3748e-15	6.61596e-15	1.14677e-15	3.51004e-15
		1.15	-5.35642e-15	8.41164e-15	1.05637e-14	6.23054e-15	2.40997e-15	1.73037e-15
		1.17	-4.33428e-15	5.53968e-15	4.22993e-15	6.7336e-15	2.99067e-15	3.4923e-15
		1.19	-2.56598e-15	3.92957e-15	2.85179e-15	4.48845e-15	4.30781e-15	1.14232e-15
		1.21	-4.71427e-15	7.74324e-15	8.42497e-15	4.62626e-15	1.00678e-15	3.05019e-15
		1.23	-6.80138e-15	8.6779e-15	3.57113e-15	6.41026e-15	1.06306e-15	1.97443e-15
		1.25	-7.02331e-15	7.97253e-15	5.34669e-15	4.84055e-15	3.94543e-15	3.21419e-15
		1.27	-7.70208e-15	8.90102e-15	6.59106e-15	7.40609e-15	6.20269e-15	3.90304e-15
		1.29	-8.76645e-16	5.74902e-15	7.09601e-15	6.75105e-15	-6.1503e-16	2.6079e-15
		1.31	-8.2804e-15	7.00992e-15	9.19318e-15	6.20756e-15	-4.53643e-16	3.12292e-15
		1.33	-6.1386e-15	6.34153e-15	6.73055e-15	6.24145e-15	2.12316e-15	3.04605e-15
		1.35	-7.19182e-16	3.30832e-15	7.1514e-15	5.25296e-15	-1.03318e-15	3.63782e-15
		1.37	-4.47781e-15	2.35069e-15	7.76108e-15	5.80024e-15	2.21074e-16	1.41e-15
		1.39	-5.74101e-15	7.18861e-15	5.36935e-15	6.8425e-15	3.94186e-15	1.19349e-15
		1.41	-1.02102e-14	2.48355e-15	5.72208e-15	3.82529e-15	3.71075e-15	2.70323e-15
		1.43	2.35325e-15	3.99515e-15	4.45787e-15	5.59535e-15	-1.78485e-15	2.57022e-15
		1.45	-9.49489e-15	4.98361e-15	9.03037e-15	5.85536e-15	1.95193e-15	3.25644e-15
		1.47	-6.82937e-15	3.87595e-15	4.48614e-15	4.79695e-15	2.29662e-15	2.94371e-15
		1.49	-2.71358e-15	4.53064e-15	9.90263e-15	5.14575e-15	3.49097e-15	3.04136e-15
		1.51	-1.01537e-14	6.984e-15	4.27144e-15	7.36367e-15	4.76321e-15	2.80733e-15
		1.53	-7.87574e-15	3.4822e-15	2.97846e-16	4.77506e-15	3.73252e-15	2.78928e-15
		1.55	-3.7998e-15	5.30651e-15	-9.60354e-16	3.91314e-15	3.28657e-15	2.51313e-15
		1.57	-1.70138e-16	2.76802e-15	-9.6208e-16	4.95982e-15	5.74618e-15	1.77771e-15
		1.59	-9.38385e-15	5.78074e-15	2.70235e-15	3.96091e-15	4.89105e-15	2.22202e-15
		1.61	-1.09683e-14	5.51209e-15	1.13675e-15	3.58082e-15	6.33729e-15	3.43635e-15
		1.63	-7.67706e-15	5.43235e-15	2.38469e-15	2.88758e-15	1.71248e-15	2.59749e-15
		1.65	-2.23844e-15	4.75435e-15	3.64054e-15	4.36726e-15	9.47976e-16	2.97384e-15
		1.67	-8.68576e-15	6.52884e-15	3.25823e-15	2.9162e-15	1.22949e-15	2.29627e-15
		1.69	-5.9985e-15	5.09788e-15	-2.28478e-15	2.87908e-15	-4.43401e-16	4.19895e-15
		1.71	-9.60442e-15	4.34189e-15	1.06522e-15	4.08481e-15	1.09186e-15	3.72864e-15
		1.73	-5.50435e-15	6.79774e-15	2.66628e-15	2.67874e-15	2.90017e-15	1.92723e-15
		1.75	-1.2618e-14	1.05227e-14	7.64439e-15	4.60221e-15	3.67138e-15	3.02268e-15
		1.77	-4.17532e-15	4.35281e-15	7.4378e-16	4.19788e-15	2.16819e-15	1.85713e-15
		1.79	-2.16927e-15	1.58932e-15	-2.77077e-15	2.70714e-15	8.02594e-16	1.67937e-15
		1.81	-4.73402e-15	5.93053e-15	-2.41216e-15	4.94687e-15	5.14296e-15	1.32879e-15
		1.83	-5.03051e-15	6.26121e-15	1.88424e-15	4.17807e-15	-1.72768e-16	3.4386e-15
		1.85	-4.23101e-15	3.26812e-15	4.01295e-16	2.07445e-15	2.02711e-15	3.29626e-15
		1.87	-9.36646e-15	4.74891e-15	-1.92567e-15	3.83376e-15	1.21854e-15	2.58029e-15
		1.89	4.93018e-16	4.10935e-15	-1.36233e-15	6.213e-15	-2.03737e-15	5.17113e-15
		1.91	-1.01068e-14	9.19015e-15	1.23021e-15	1.83385e-15	6.27311e-15	3.43471e-15
		1.93	-3.57805e-15	4.45064e-15	7.52481e-16	2.61721e-15	-5.59768e-17	2.99492e-15
		1.95	-1.10221e-14	8.76697e-15	4.82192e-15	4.25419e-15	2.07998e-15	2.21685e-15
		1.97	-6.79061e-15	4.80229e-15	5.61475e-15	4.6904e-15	-2.524e-15	2.77924e-15
		1.99	-9.8782e-15	7.67535e-15	4.79082e-15	1.78212e-15	9.97074e-16	3.98014e-15
		2.01	-3.8362e-15	3.64367e-15	-1.01184e-15	2.35158e-15	4.67688e-15	2.33205e-15
		2.03	-6.76588e-15	1.04937e-15	1.34562e-15	4.6737e-15	3.05611e-15	2.54988e-15
		2.05	-3.16238e-16	3.63104e-15	5.62327e-15	5.38543e-15	5.55293e-15	2.43348e-15
		2.07	-6.10374e-15	4.10009e-15	1.17824e-15	3.6022e-15	2.03713e-15	2.97931e-15
		2.09	-1.19642e-14	7.58234e-15	2.63818e-15	2.72626e-15	-2.12173e-16	2.93137e-15
		2.11	-9.01154e-15	5.4627e-15	-1.92384e-15	2.45655e-15	2.31749e-15	2.67694e-15
		2.13	-8.79941e-15	6.8109e-15	6.66935e-15	4.14782e-15	4.79277e-15	1.89947e-15
		2.15	-7.55436e-15	6.30689e-15	1.58225e-15	4.0255e-15	4.27881e-15	3.90894e-15
		2.17	-5.67084e-15	4.74454e-15	-7.76403e-16	4.01299e-15	1.71466e-15	1.72822e-15
		2.19	-6.73108e-15	4.39171e-15	4.04883e-17	2.95622e-15	-6.07482e-17	1.6727e-15
		2.21	-9.52661e-15	5.06853e-15	5.5879e-15	2.49412e-15	3.61909e-15	2.78914e-15
		2.23	-1.08617e-14	7.78118e-15	-2.01516e-15	2.65885e-15	2.74677e-15	2.10141e-15
		2.25	-8.74865e-15	4.2244e-15	2.66751e-15	4.20442e-15	1.95084e-15	3.29258e-15
		2.27	-8.27486e-15	7.34021e-15	3.79752e-15	2.45028e-15	-1.99761e-15	2.22987e-15
		2.29	-6.53826e-15	3.78642e-15	7.70543e-16	3.58795e-15	3.46209e-15	4.98302e-15
		2.31	-1.14455e-14	8.03261e-15	-3.48593e-15	4.38923e-15	5.76536e-16	2.61354e-15
		2.33	-3.42495e-15	7.55862e-15	2.3486e-15	3.53971e-15	-3.12173e-15	1.55797e-15
		2.35	1.24947e-15	6.39824e-15	4.94399e-15	5.0214e-15	8.62093e-16	3.50977e-15
		2.37	-5.80995e-15	6.36947e-15	4.3036e-15	3.46454e-15	-6.13085e-16	2.13102e-15
		2.39	-5.91824e-15	4.61608e-15	8.95605e-16	5.19555e-15	4.53115e-15	2.76891e-15
		2.41	3.20836e-16	5.87521e-15	7.45917e-15	4.77803e-15	2.59762e-15	2.71021e-15
		2.43	-3.94472e-15	7.42084e-15	1.16114e-15	4.70959e-15	1.82507e-15	2.79682e-15
		2.45	-2.79025e-15	5.83172e-15	-2.08417e-15	3.89344e-15	1.18632e-15	1.19867e-15
		2.47	2.05194e-15	7.79622e-15	1.95276e-15	4.1144e-15	-5.65564e-16	1.84641e-15
		2.49	4.68306e-16	4.24363e-15	2.7648e-15	3.75451e-15	-2.45594e-15	3.06647e-15
		2.51	-5.4262e-15	7.77681e-15	4.00797e-15	3.53661e-15	-9.13154e-17	3.07092e-15
		2.53	-5.76952e-15	5.19088e-15	3.59169e-15	3.25493e-15	-3.35705e-15	4.01658e-15
		2.55	-2.99449e-15	7.55978e-15	-3.45328e-16	4.87092e-15	-1.99569e-15	3.3707e-15
		2.57	-3.56112e-15	3.75852e-15	1.32511e-15	5.7064e-15	7.14142e-16	6.19776e-15
		2.59	-8.57396e-15	4.86627e-15	1.16016e-15	6.24941e-15	1.55527e-15	3.55298e-15
		2.61	-3.53538e-15	7.50828e-15	3.32621e-15	4.99737e-15	-1.34345e-16	3.3492e-15
		2.63	-7.04641e-15	5.64255e-15	6.04774e-15	3.69384e-15	-2.0725e-15	2.93597e-15
		2.65	-5.9384e-15	5.08327e-15	7.81226e-15	3.81039e-15	-1.24017e-15	1.29866e-15
		2.67	-5.64749e-15	7.66274e-15	4.32615e-15	5.27347e-15	1.51667e-15	4.40651e-15
		2.69	-6.7686e-15	5.54051e-15	3.10657e-15	4.1977e-15	3.43141e-16	4.19907e-15
		2.71	-5.90155e-15	8.83295e-15	4.32992e-15	4.33575e-15	3.27209e-15	5.10302e-15
		2.73	-7.14088e-15	6.50847e-15	2.05626e-15	4.79072e-15	1.67073e-15	4.19704e-15
		2.75	-5.83751e-15	6.38623e-15	2.97933e-15	6.28421e-15	1.70394e-15	3.60296e-15
		2.77	-9.07174e-15	7.03668e-15	3.8898e-15	4.85285e-15	-7.60725e-16	2.22084e-15
		2.79	-5.75694e-15	4.21513e-15	-8.80272e-17	3.00386e-15	-1.78153e-15	2.95428e-15
		2.81	-1.44424e-15	4.56967e-15	7.91489e-15	5.43795e-15	-6.07691e-15	4.24854e-15
		2.83	-9.495e-15	9.32352e-15	1.33273e-16	3.56937e-15	-4.4774e-15	2.20455e-15
		2.85	-9.93697e-15	6.37198e-15	4.11732e-15	4.5194e-15	-3.0281e-15	2.63673e-15
		2.87	-9.29144e-15	9.39884e-15	2.93154e-15	2.31494e-15	-5.66544e-15	2.90948e-15
		2.89	-7.75297e-15	4.50453e-15	2.55415e-15	2.22569e-15	-1.61161e-15	3.18819e-15
		2.91	-6.07386e-15	6.76319e-15	-1.13876e-15	3.22587e-15	-2.36805e-15	3.42419e-15
		2.93	-7.41268e-16	4.93415e-15	-2.13837e-15	2.76594e-15	-4.2168e-15	1.91932e-15
		2.95	-6.24646e-15	5.96451e-15	5.8823e-15	4.05603e-15	-3.05987e-16	2.88909e-15
		2.97	-2.26855e-15	3.32193e-15	1.15065e-15	4.0965e-15	-1.38183e-15	6.01544e-15
		2.99	-3.64745e-15	2.91324e-15	5.266e-15	4.24139e-15	-1.89717e-15	3.11897e-15
		3.01	-6.53604e-16	2.63683e-15	4.59076e-15	3.19384e-15	-3.77909e-15	3.54509e-15
		3.03	-5.39347e-15	5.02457e-15	-2.71058e-16	2.87926e-15	3.44091e-16	4.69386e-15
		3.05	-3.97178e-15	6.53575e-15	3.06691e-15	2.78312e-15	-5.2564e-15	3.31173e-15
		3.07	-1.20393e-15	5.94075e-15	1.77704e-16	2.71143e-15	-2.92927e-15	3.08735e-15
		3.09	-2.45452e-15	5.66772e-15	-2.52462e-16	2.94926e-15	-2.85227e-15	4.70191e-15
		3.11	-6.07565e-15	4.16603e-15	1.18263e-15	4.64998e-15	-1.20897e-16	3.10784e-15
		3.13	-9.98252e-16	5.78951e-15	1.0469e-15	3.3081e-15	-6.09424e-16	3.37255e-15
		3.15	-4.38666e-15	6.92422e-15	2.27208e-15	5.08274e-15	-3.11269e-15	2.55328e-15
		3.17	-1.64337e-15	2.87025e-15	3.49419e-15	2.35652e-15	-5.4988e-15	3.37236e-15
		3.19	8.46349e-16	1.99206e-15	2.33274e-15	4.20562e-15	-7.71925e-15	4.09457e-15
		3.21	-6.1016e-15	3.30811e-15	-1.81633e-15	2.56922e-15	-5.92876e-15	4.18735e-15
		3.23	-6.01461e-15	4.29498e-15	5.11788e-16	3.29811e-15	-2.70851e-15	3.03035e-15
		3.25	-3.02772e-15	3.72708e-15	-1.4471e-15	1.18798e-15	-5.06637e-15	3.49789e-15
		3.27	-2.61105e-15	3.97283e-15	3.64452e-15	2.93106e-15	-6.09448e-15	4.16963e-15
		3.29	-1.52415e-15	5.07971e-15	-1.06604e-15	2.18775e-15	-4.77309e-15	3.29934e-15
		3.31	-5.05375e-15	5.58923e-15	-5.81054e-16	4.18992e-15	-4.96859e-15	4.31717e-15
		3.33	-6.14699e-16	3.07332e-15	2.42134e-15	3.56983e-15	-9.68599e-16	5.8721e-15
		3.35	-1.78705e-15	3.91148e-15	-4.73644e-15	1.30111e-15	-2.76462e-15	2.87321e-15
		3.37	-9.98748e-16	4.33588e-15	-1.58884e-15	2.65987e-15	-6.51909e-15	5.19768e-15
		3.39	-5.64679e-15	5.20589e-15	-6.31512e-15	3.0833e-15	-6.68156e-15	3.05332e-15
		3.41	-5.06819e-15	3.23522e-15	3.98442e-15	3.20738e-15	-2.32498e-15	4.65793e-15
		3.43	8.35848e-17	2.38547e-15	1.56953e-15	4.67952e-15	-1.45497e-15	4.93963e-15
		3.45	-1.31232e-15	2.37677e-15	-9.55117e-16	3.57089e-15	-1.21617e-15	4.94144e-15
		3.47	-2.88743e-15	5.89833e-15	-1.96881e-15	2.95708e-15	-3.75152e-15	6.19397e-15
		3.49	1.41963e-15	1.45333e-15	-6.2651e-15	3.07282e-15	-5.60567e-16	3.40739e-15
		3.51	-3.11451e-15	4.95487e-15	-3.2507e-15	4.31301e-15	-3.31039e-15	3.80392e-15
		3.53	-7.28912e-15	4.60225e-15	1.9344e-15	3.47519e-15	-3.14511e-15	6.55955e-15
		3.55	1.16213e-15	3.05455e-15	-5.01296e-16	3.523e-15	-6.57498e-15	4.3366e-15
		3.57	-9.22261e-15	7.81326e-15	-6.27337e-15	3.70201e-15	-3.80829e-15	5.75594e-15
		3.59	-4.76273e-15	4.0968e-15	-2.3404e-15	4.74441e-15	-9.32915e-17	4.93517e-15
		3.61	-3.08168e-15	1.82895e-15	3.12737e-15	3.03904e-15	-1.51007e-15	5.4113e-15
		3.63	-3.79549e-15	3.53928e-15	-2.12398e-15	2.78202e-15	-3.59731e-15	5.87816e-15
		3.65	-2.5572e-15	2.14879e-15	-1.53259e-15	4.53185e-15	-1.8947e-15	6.299e-15
		3.67	-2.66516e-15	3.90529e-15	-6.50982e-15	1.96268e-15	-5.97778e-15	6.2581e-15
		3.69	-3.21778e-15	5.94702e-15	-4.77387e-15	2.82342e-15	-3.18633e-15	6.71081e-15
		3.71	-1.62325e-15	4.36097e-15	-1.96521e-15	3.76562e-15	-2.10998e-15	6.2717e-15
		3.73	-7.90644e-16	4.39725e-15	6.10483e-17	2.51228e-15	-2.05397e-15	7.3069e-15
		3.75	-2.84734e-15	2.94006e-15	1.79824e-15	4.36194e-15	-5.58842e-16	6.77973e-15
		3.77	-1.17007e-15	3.84805e-15	2.9904e-15	3.16779e-15	-4.66787e-15	6.60773e-15
		3.79	-8.5285e-15	5.33217e-15	3.53208e-15	2.95901e-15	-4.75477e-15	6.07778e-15
		3.81	-1.7535e-15	3.27831e-15	5.34133e-15	1.80413e-15	-4.41227e-15	5.12829e-15
		3.83	-1.95133e-15	6.5757e-15	-2.70138e-15	2.64396e-15	-1.34456e-15	6.94188e-15
		3.85	-1.96872e-15	6.43448e-15	-4.19177e-16	3.34221e-15	-2.16029e-15	6.59892e-15
		3.87	1.63567e-15	2.37124e-15	-3.33618e-16	3.16131e-15	-8.10807e-15	6.14117e-15
		3.89	3.76882e-15	2.38971e-15	-1.77099e-15	2.44635e-15	-4.89042e-15	5.2968e-15
		3.91	-4.46848e-15	4.93205e-15	7.7882e-16	3.64182e-15	-3.93061e-15	6.33074e-15
		3.93	1.202e-15	3.1257e-15	-4.99094e-15	3.58677e-15	-5.57173e-15	5.94784e-15
		3.95	3.13244e-15	3.74549e-15	-6.67887e-15	4.32157e-15	-3.98839e-15	5.62743e-15
		3.97	-1.94445e-16	4.46494e-15	-9.4521e-16	3.83119e-15	-4.54887e-15	6.24931e-15
		3.99	-2.94725e-15	4.71869e-15	-4.77705e-15	3.23932e-15	4.92037e-17	7.10303e-15
		4.01	-4.19014e-15	2.71697e-15	-4.63689e-15	2.22803e-15	-2.80361e-15	7.13202e-15
		4.03	-1.13817e-15	5.60252e-15	-3.90724e-15	3.31551e-15	-9.2655e-15	4.17916e-15
		4.05	-9.15387e-15	5.54674e-15	-3.95812e-15	3.45917e-15	-2.78426e-15	6.76683e-15
		4.07	-8.75758e-15	5.54087e-15	-4.85609e-15	2.98042e-15	-5.54266e-15	5.05731e-15
		4.09	-6.12956e-16	1.80686e-15	-3.06513e-15	2.70357e-15	-5.23611e-15	3.97404e-15
		4.11	-2.28954e-15	3.81181e-15	-2.34312e-16	2.31381e-15	-2.45812e-15	4.6438e-15
		4.13	-3.11448e-15	3.63345e-15	-5.41991e-15	3.14781e-15	-2.54631e-15	6.09799e-15
		4.15	1.35547e-15	1.82309e-15	-3.32025e-15	2.37096e-15	-3.32415e-16	5.87447e-15
		4.17	-2.62944e-16	3.06074e-15	-4.82838e-15	4.17512e-15	-2.5866e-15	5.69598e-15
		4.19	-1.55323e-15	6.98806e-16	-3.22876e-15	4.05367e-15	-1.9768e-15	6.12354e-15
		4.21	-5.10992e-15	3.01704e-15	-6.82509e-15	5.3387e-15	-3.26204e-15	5.35459e-15
		4.23	9.93318e-16	2.2465e-15	1.89819e-15	1.9476e-15	-5.33833e-15	7.30971e-15
		4.25	-6.02762e-15	3.38502e-15	7.50319e-15	4.78179e-15	-7.28947e-15	5.52513e-15
		4.27	-3.83213e-15	3.52512e-15	2.85016e-15	2.2389e-15	-4.15879e-15	7.48074e-15
		4.29	-2.61383e-15	1.10129e-15	-8.32775e-16	2.02386e-15	-9.98166e-15	7.93887e-15
		4.31	-6.66274e-15	4.91851e-15	-2.91042e-15	2.22826e-15	-5.6911e-15	7.62205e-15
		4.33	1.43243e-15	3.10567e-15	2.79212e-15	3.96982e-15	-7.05586e-15	6.21918e-15
		4.35	2.28269e-15	2.7043e-15	-6.24671e-15	3.44536e-15	-7.09302e-15	7.11083e-15
		4.37	-2.90724e-15	2.4333e-15	2.95549e-15	1.91196e-15	-7.94112e-15	8.07279e-15
		4.39	-3.87522e-15	3.01924e-15	-4.35234e-15	2.22028e-15	-6.15254e-15	6.69173e-15
		4.41	-2.77436e-15	1.25766e-15	-5.93793e-15	3.6017e-15	-7.50722e-15	6.51723e-15
		4.43	9.63247e-16	4.12749e-15	2.08273e-15	2.50524e-15	-8.89302e-15	8.43974e-15
		4.45	7.64822e-16	4.12933e-15	3.52534e-15	2.07585e-15	-9.42433e-15	8.21613e-15
		4.47	3.31639e-15	2.21361e-15	3.04341e-15	3.45415e-15	-2.23581e-15	7.77676e-15
		4.49	2.88394e-15	4.33818e-15	1.27671e-15	2.60121e-15	-4.29189e-15	8.91685e-15
		4.51	1.72765e-15	4.44496e-15	-2.21056e-15	3.89776e-15	-6.2283e-15	7.74159e-15
		4.53	3.92487e-15	5.54176e-15	1.7182e-16	4.02418e-15	-4.90454e-15	8.51796e-15
		4.55	-2.82659e-15	3.27516e-15	1.46014e-15	2.98318e-15	-4.36342e-15	7.79974e-15
		4.57	8.85688e-16	2.1314e-15	-4.55443e-15	5.64253e-15	-1.44562e-15	7.86127e-15
		4.59	2.6358e-15	5.27002e-15	-3.63959e-15	8.41328e-15	-4.11619e-15	7.23156e-15
		4.61	-9.2401e-16	1.59977e-15	3.07278e-15	4.52373e-15	-1.03629e-14	4.95043e-15
		4.63	-4.75492e-15	3.17196e-15	-6.77045e-16	2.77066e-15	-6.33201e-15	5.75886e-15
		4.65	-6.49327e-15	5.23797e-15	6.76821e-16	2.75927e-15	-3.94194e-15	6.67772e-15
		4.67	-8.89297e-16	1.76795e-15	-8.46255e-16	3.64703e-15	-7.94296e-15	7.73632e-15
		4.69	-1.22122e-15	6.66289e-15	-3.15886e-15	2.32753e-15	-7.43661e-15	6.57665e-15
		4.71	-1.98784e-15	3.87217e-15	2.29219e-15	1.36344e-15	-8.60341e-15	8.13373e-15
		4.73	-5.00676e-15	2.01308e-15	-3.55163e-15	2.30782e-15	-6.23904e-15	1.00747e-14
		4.75	4.51333e-15	4.72596e-15	-1.0472e-16	3.08166e-15	-3.52722e-15	7.02414e-15
		4.77	6.51462e-16	1.63648e-15	-7.86051e-16	4.38926e-15	-2.74455e-15	8.47944e-15
		4.79	-2.07879e-15	2.54905e-15	-1.15262e-15	2.82519e-15	-9.26039e-15	8.35667e-15
		4.81	-4.67807e-15	1.86462e-15	3.88383e-16	2.42743e-15	-5.62796e-15	9.99851e-15
		4.83	-5.7746e-15	2.36678e-15	-2.56002e-15	5.08162e-15	-8.52781e-15	9.27892e-15
		4.85	7.26361e-17	2.87431e-15	-4.76147e-15	2.72804e-15	-7.2116e-15	9.11844e-15
		4.87	-2.89063e-15	1.93817e-15	-2.81259e-15	4.20295e-15	-4.83484e-15	9.34007e-15
		4.89	-5.37323e-15	5.06467e-15	-2.85571e-15	3.52445e-15	-1.13913e-14	7.76095e-15
		4.91	3.33609e-15	6.7703e-15	-2.8523e-15	2.24312e-15	-8.74687e-15	9.08401e-15
		4.93	-1.67162e-16	4.03269e-15	-2.75802e-15	2.28447e-15	-9.42851e-15	9.72965e-15
		4.95	3.20407e-15	4.38379e-15	-1.16812e-15	2.08119e-15	-8.34397e-15	7.5346e-15
		4.97	-1.87996e-15	6.6038e-15	-5.06834e-15	2.98086e-15	-1.02417e-14	9.22726e-15
		4.99	-2.33042e-15	4.17088e-15	-3.2712e-15	3.08147e-15	-7.45006e-15	8.20871e-15
		5.01
		5.03
		5.05
		5.07
		5.09
		5.11
		5.13
		5.15
		5.17
		5.19
		5.21
		5.23
		5.25
		5.27
		5.29
		5.31
		5.33
		5.35
		5.37
		5.39
		5.41
		5.43
		5.45	3.09164e-13	3.19223e-14	2.75691e-13	4.66415e-14	3.70393e-13	4.95947e-14
		5.47	3.10767e-13	2.86935e-14	2.73711e-13	4.8489e-14	3.68413e-13	4.96246e-14
		5.49	3.05519e-13	3.00681e-14	2.69267e-13	4.74983e-14	3.64085e-13	4.64534e-14
		5.51	3.07998e-13	2.31768e-14	2.65384e-13	4.72393e-14	3.63758e-13	4.9483e-14
		5.53	3.01838e-13	3.00312e-14	2.65078e-13	4.58616e-14	3.57052e-13	4.81171e-14
		5.55	3.05508e-13	2.64642e-14	2.6353e-13	4.5657e-14	3.52003e-13	4.62849e-14
		5.57	2.9698e-13	2.86133e-14	2.60244e-13	4.64473e-14	3.52008e-13	4.65921e-14
		5.59	3.01608e-13	2.79295e-14	2.59031e-13	4.69868e-14	3.48522e-13	4.68299e-14
		5.61	2.96244e-13	2.85487e-14	2.62928e-13	4.41489e-14	3.52012e-13	4.94595e-14
		5.63	2.9697e-13	2.86143e-14	2.60373e-13	4.48172e-14	3.42441e-13	4.56491e-14
		5.65	3.0217e-13	2.4551e-14	2.63808e-13	4.43293e-14	3.40982e-13	4.56392e-14
		5.67	2.98296e-13	2.85228e-14	2.5868e-13	4.3718e-14	3.42763e-13	4.45654e-14
		5.69	3.01217e-13	2.62825e-14	2.53929e-13	4.43743e-14	3.41294e-13	4.68461e-14
		5.71	2.97734e-13	2.51687e-14	2.54492e-13	4.58771e-14	3.40827e-13	4.55103e-14
		5.73	2.97021e-13	2.80304e-14	2.58658e-13	4.41969e-14	3.40304e-13	4.51974e-14
		5.75	2.95841e-13	2.71458e-14	2.54771e-13	4.31111e-14	3.40448e-13	4.41903e-14
		5.77	2.96107e-13	2.71345e-14	2.60282e-13	4.29512e-14	3.39534e-13	4.49999e-14
		5.79	2.94633e-13	2.6729e-14	2.57344e-13	4.64479e-14	3.3519e-13	4.35635e-14
		5.81	2.9542e-13	2.84325e-14	2.52996e-13	4.54196e-14	3.33088e-13	4.2218e-14
		5.83	3.03068e-13	2.32417e-14	2.54115e-13	4.53402e-14	3.35231e-13	4.40206e-14
		5.85	2.96633e-13	2.5421e-14	2.5458e-13	4.25749e-14	3.31521e-13	4.56974e-14
		5.87	3.02719e-13	2.39445e-14	2.57652e-13	4.33981e-14	3.31085e-13	4.56383e-14
		5.89	2.88608e-13	2.91765e-14	2.57763e-13	4.5648e-14	3.29225e-13	4.49436e-14
		5.91	2.93662e-13	2.63441e-14	2.52612e-13	4.43827e-14	3.28166e-13	4.4161e-14
		5.93	2.94577e-13	2.32496e-14	2.49331e-13	4.28599e-14	3.26631e-13	4.48247e-14
		5.95	2.95849e-13	2.33822e-14	2.49937e-13	4.34178e-14	3.29439e-13	4.44469e-14
		5.97	2.94744e-13	2.46199e-14	2.51935e-13	4.42078e-14	3.26279e-13	4.50142e-14
		5.99	2.98927e-13	2.47789e-14	2.51091e-13	4.61384e-14	3.26357e-13	4.69802e-14
		6.01	2.90436e-13	2.55043e-14	2.52965e-13	4.58622e-14	3.23512e-13	4.43992e-14
		6.03	2.87083e-13	2.39898e-14	2.50538e-13	4.5332e-14	3.25137e-13	4.65605e-14
		6.05	2.84225e-13	2.65324e-14	2.52447e-13	4.3645e-14	3.21498e-13	4.41283e-14
		6.07	2.89787e-13	2.43257e-14	2.51507e-13	4.11021e-14	3.1782e-13	4.4531e-14
		6.09	2.90714e-13	2.55203e-14	2.48408e-13	4.56604e-14	3.18739e-13	4.43044e-14
		6.11	2.82919e-13	2.43345e-14	2.46643e-13	4.43785e-14	3.17106e-13	4.43864e-14
		6.13	2.83942e-13	2.48535e-14	2.48044e-13	4.27335e-14	3.16586e-13	4.52381e-14
		6.15	2.88795e-13	2.51585e-14	2.47751e-13	4.31168e-14	3.15534e-13	4.23018e-14
		6.17	2.84638e-13	2.5943e-14	2.44748e-13	4.21424e-14	3.18032e-13	4.61375e-14
		6.19	2.81953e-13	2.10792e-14	2.5046e-13	4.35046e-14	3.13627e-13	4.57621e-14
		6.21	2.85896e-13	2.42831e-14	2.4671e-13	4.47478e-14	3.1526e-13	4.55458e-14
		6.23	2.82398e-13	2.47958e-14	2.47255e-13	4.23568e-14	3.12789e-13	4.50398e-14
		6.25	2.88447e-13	2.33805e-14	2.49463e-13	4.43228e-14	3.10183e-13	4.24685e-14
		6.27	2.86722e-13	2.41639e-14	2.44464e-13	4.30484e-14	3.13601e-13	4.31271e-14
		6.29	2.85218e-13	2.28651e-14	2.41586e-13	4.38684e-14	3.13454e-13	4.65321e-14
		6.31	2.80105e-13	2.3251e-14	2.45225e-13	4.51235e-14	3.12169e-13	4.27999e-14
		6.33	2.84226e-13	2.53206e-14	2.41631e-13	4.62106e-14	3.11464e-13	4.40842e-14
		6.35	2.82883e-13	2.41235e-14	2.42675e-13	4.54602e-14	3.09652e-13	4.36825e-14
		6.37	2.81766e-13	2.39043e-14	2.503e-13	4.62875e-14	3.11461e-13	4.46267e-14
		6.39	2.78445e-13	2.6334e-14	2.45917e-13	4.34583e-14	3.10919e-13	4.39139e-14
		6.41	2.76853e-13	2.09304e-14	2.45869e-13	4.25196e-14	3.08493e-13	4.424e-14
		6.43	2.81127e-13	2.58407e-14	2.41425e-13	4.52212e-14	3.07538e-13	4.62403e-14
		6.45	2.80479e-13	2.68717e-14	2.41008e-13	4.32207e-14	3.07241e-13	4.21581e-14
		6.47	2.84279e-13	2.42701e-14	2.44574e-13	4.36067e-14	3.12109e-13	4.49647e-14
		6.49	2.82822e-13	2.37551e-14	2.39832e-13	4.2882e-14	3.14379e-13	4.6038e-14
		6.51	2.77533e-13	2.46724e-14	2.38167e-13	4.62683e-14	3.06153e-13	4.30696e-14
		6.53	2.78146e-13	2.18261e-14	2.39432e-13	4.30122e-14	3.12997e-13	4.60668e-14
		6.55	2.77456e-13	2.69063e-14	2.35032e-13	4.26626e-14	3.10154e-13	4.2663e-14
		6.57	2.77057e-13	2.46298e-14	2.32076e-13	4.18161e-14	3.05947e-13	4.20023e-14
		6.59	2.74046e-13	2.37156e-14	2.34467e-13	4.37729e-14	3.03731e-13	4.25099e-14
		6.61	2.78391e-13	1.99631e-14	2.34532e-13	4.28111e-14	3.07136e-13	4.28442e-14
		6.63	2.6957e-13	2.56509e-14	2.37759e-13	4.4343e-14	3.03861e-13	4.15136e-14
		6.65	2.72484e-13	2.26467e-14	2.33103e-13	4.41391e-14	3.05869e-13	4.24151e-14
		6.67	2.76999e-13	2.17065e-14	2.38042e-13	4.16175e-14	3.07967e-13	4.18924e-14
		6.69	2.74119e-13	2.07547e-14	2.35648e-13	4.28617e-14	3.0474e-13	4.28461e-14
		6.71	2.6979e-13	2.11961e-14	2.32855e-13	4.28022e-14	3.03329e-13	4.22945e-14
		6.73	2.75539e-13	1.88752e-14	2.34905e-13	4.22004e-14	3.07437e-13	4.25767e-14
		6.75	2.68984e-13	2.34451e-14	2.37269e-13	4.25197e-14	3.02135e-13	4.38679e-14
		6.77	2.69382e-13	2.09956e-14	2.4203e-13	4.46018e-14	3.01078e-13	4.24229e-14
		6.79	2.68118e-13	1.97992e-14	2.28184e-13	4.24109e-14	3.03167e-13	4.43343e-14
		6.81	2.71589e-13	2.06942e-14	2.31034e-13	4.26643e-14	3.02348e-13	4.25289e-14
		6.83	2.71468e-13	1.96557e-14	2.3128e-13	4.25091e-14	3.0687e-13	4.38361e-14
		6.85	2.73713e-13	2.06821e-14	2.34336e-13	4.24515e-14	3.00064e-13	4.07336e-14
		6.87	2.69005e-13	2.07137e-14	2.31729e-13	4.31831e-14	3.00573e-13	4.12103e-14
		6.89	2.66746e-13	2.12285e-14	2.36412e-13	4.17612e-14	3.01138e-13	4.20595e-14
		6.91	2.71727e-13	2.36216e-14	2.37415e-13	4.27722e-14	3.05339e-13	4.41043e-14
		6.93	2.6147e-13	2.12409e-14	2.35011e-13	4.14094e-14	2.98443e-13	4.27381e-14
		6.95	2.56439e-13	2.44025e-14	2.30288e-13	4.08146e-14	3.01482e-13	4.34062e-14
		6.97	2.6276e-13	2.10109e-14	2.25883e-13	4.25864e-14	3.0243e-13	4.39222e-14
		6.99	2.6855e-13	1.89033e-14	2.31706e-13	4.07229e-14	3.03165e-13	4.37541e-14
		7.01	2.6502e-13	1.89379e-14	2.32146e-13	4.21734e-14	2.99352e-13	4.41158e-14
		7.03	2.63152e-13	2.0764e-14	2.20116e-13	4.2499e-14	3.05727e-13	4.64682e-14
		7.05	2.64835e-13	2.41009e-14	2.25351e-13	4.10661e-14	3.02346e-13	4.41713e-14
		7.07	2.64708e-13	2.33444e-14	2.26801e-13	4.09286e-14	3.01558e-13	4.45e-14
		7.09	2.57712e-13	2.10407e-14	2.29653e-13	4.22437e-14	3.02084e-13	4.48608e-14
		7.11	2.56719e-13	2.20923e-14	2.26413e-13	4.11838e-14	2.96053e-13	4.44276e-14
		7.13	2.64682e-13	2.24645e-14	2.21083e-13	3.99952e-14	3.02884e-13	4.7805e-14
		7.15	2.58616e-13	2.06165e-14	2.17969e-13	4.25721e-14	3.01175e-13	4.61324e-14
		7.17	2.55299e-13	2.07554e-14	2.23408e-13	4.07372e-14	2.94665e-13	4.40632e-14
		7.19	2.58928e-13	2.06e-14	2.23793e-13	4.235e-14	2.98869e-13	4.57174e-14
		7.21	2.59192e-13	2.14521e-14	2.29259e-13	4.515e-14	2.91502e-13	4.31927e-14
		7.23	2.60531e-13	2.0113e-14	2.20329e-13	4.04093e-14	2.99217e-13	4.65452e-14
		7.25	2.58941e-13	1.94159e-14	2.2023e-13	4.17839e-14	2.94949e-13	4.48256e-14
		7.27	2.60708e-13	1.83691e-14	2.16333e-13	4.1939e-14	2.94092e-13	4.37366e-14
		7.29	2.51204e-13	2.0252e-14	2.21758e-13	4.12731e-14	2.94893e-13	4.55393e-14
		7.31	2.52918e-13	2.3383e-14	2.2119e-13	3.98137e-14	2.92042e-13	4.43369e-14
		7.33	2.53489e-13	2.15401e-14	2.20679e-13	3.96314e-14	2.86483e-13	4.27789e-14
		7.35	2.59169e-13	2.0377e-14	2.21494e-13	3.97625e-14	2.93437e-13	4.59347e-14
		7.37	2.53329e-13	1.81595e-14	2.22593e-13	3.89459e-14	2.83724e-13	4.29779e-14
		7.39	2.51033e-13	2.1857e-14	2.20266e-13	3.96928e-14	2.87181e-13	4.45232e-14
		7.41	2.52882e-13	1.84919e-14	2.16481e-13	3.94598e-14	2.87125e-13	4.13524e-14
		7.43	2.51279e-13	2.01137e-14	2.16761e-13	4.32869e-14	2.8722e-13	4.43768e-14
		7.45	2.49139e-13	2.14883e-14	2.16493e-13	3.82011e-14	2.87555e-13	4.30741e-14
		7.47	2.48058e-13	2.26456e-14	2.1649e-13	3.91232e-14	2.79856e-13	4.25956e-14
		7.49	2.47202e-13	1.88226e-14	2.31526e-13	4.6558e-14	2.86659e-13	4.42727e-14
		7.51	2.4879e-13	1.77862e-14	2.31117e-13	4.7409e-14	2.83866e-13	4.29182e-14
		7.53	2.4835e-13	1.99763e-14	2.17579e-13	3.78496e-14	2.81953e-13	4.44637e-14
		7.55	2.48327e-13	1.86874e-14	2.17852e-13	3.87708e-14	2.77391e-13	4.32948e-14
		7.57	2.46213e-13	1.80527e-14	2.18779e-13	3.98946e-14	2.8148e-13	4.43059e-14
		7.59	2.48291e-13	1.76495e-14	2.18897e-13	3.92301e-14	2.8005e-13	4.47953e-14
		7.61	2.40205e-13	2.00677e-14	2.14283e-13	3.894e-14	2.76881e-13	4.20967e-14
		7.63	2.36494e-13	1.99261e-14	2.13985e-13	3.97897e-14	2.77562e-13	4.35581e-14
		7.65	2.42878e-13	1.82574e-14	2.11544e-13	3.77693e-14	2.75345e-13	4.21571e-14
		7.67	2.42012e-13	1.83073e-14	2.10443e-13	4.01199e-14	2.69681e-13	4.07841e-14
		7.69	2.45038e-13	1.67847e-14	2.17692e-13	3.94907e-14	2.7228e-13	4.14259e-14
		7.71	2.4079e-13	1.78046e-14	2.13891e-13	4.05357e-14	2.70026e-13	4.00027e-14
		7.73	2.42477e-13	1.94539e-14	2.14539e-13	3.91089e-14	2.73981e-13	4.18846e-14
		7.75	2.37681e-13	1.69327e-14	2.19078e-13	3.92913e-14	2.72781e-13	4.19156e-14
		7.77	2.36489e-13	1.82219e-14	2.15255e-13	3.82287e-14	2.73965e-13	4.26795e-14
		7.79	2.4374e-13	1.36455e-14	2.10151e-13	3.71889e-14	2.69788e-13	4.12678e-14
		7.81	2.48163e-13	1.33903e-14	2.06667e-13	3.91121e-14	2.68761e-13	4.06848e-14
		7.83	2.47307e-13	1.58864e-14	2.15358e-13	3.91738e-14	2.68552e-13	4.28679e-14
		7.85	2.44832e-13	1.38581e-14	2.1147e-13	3.92527e-14	2.68533e-13	4.38435e-14
		7.87	2.39496e-13	1.51158e-14	2.16029e-13	3.80591e-14	2.7333e-13	4.43618e-14
		7.89	2.38156e-13	1.07498e-14	2.14743e-13	4.06947e-14	2.76115e-13	4.30222e-14
		7.91	2.41282e-13	1.28723e-14	2.08222e-13	3.59684e-14	2.76493e-13	4.57453e-14
		7.93	2.4412e-13	1.19421e-14	2.08148e-13	3.54546e-14	2.74817e-13	4.56643e-14
		7.95	2.39073e-13	1.40524e-14	2.09684e-13	3.67546e-14	2.73737e-13	4.39592e-14
		7.97	2.43415e-13	1.14272e-14	2.03503e-13	3.79007e-14	2.76349e-13	4.47738e-14
		7.99	2.41499e-13	1.25091e-14	2.05422e-13	3.58763e-14	2.73237e-13	4.48474e-14
		8.01	2.37875e-13	1.33075e-14	2.04251e-13	3.67936e-14	2.67736e-13	4.28626e-14
		8.03	2.40152e-13	1.21914e-14	2.10402e-13	3.74734e-14	2.72789e-13	4.38721e-14
		8.05	2.37703e-13	1.20529e-14	2.03453e-13	3.75423e-14	2.71955e-13	4.45646e-14
		8.07	2.38162e-13	1.42603e-14	2.03288e-13	3.56022e-14	2.71225e-13	4.39905e-14
		8.09	2.36994e-13	1.62047e-14	2.01995e-13	3.48777e-14	2.69932e-13	4.44832e-14
		8.11	2.36796e-13	1.21705e-14	2.03669e-13	3.66088e-14	2.72323e-13	4.47265e-14
		8.13	2.33879e-13	1.3282e-14	1.98457e-13	3.68166e-14	2.73152e-13	4.56636e-14
		8.15	2.32695e-13	1.18864e-14	1.98375e-13	3.73309e-14	2.75114e-13	4.73785e-14
		8.17	2.32566e-13	1.15324e-14	1.95317e-13	3.60068e-14	2.70262e-13	4.37225e-14
		8.19	2.28672e-13	1.5022e-14	1.93327e-13	3.81691e-14	2.663e-13	4.24485e-14
		8.21	2.34197e-13	1.34042e-14	1.97325e-13	3.43732e-14	2.70679e-13	4.08938e-14
		8.23	2.35159e-13	1.14772e-14	1.96239e-13	3.72992e-14	2.6911e-13	4.58038e-14
		8.25	2.39988e-13	1.15328e-14	1.97274e-13	3.78216e-14	2.68736e-13	4.45118e-14
		8.27	2.28582e-13	1.36725e-14	1.95878e-13	3.40793e-14	2.6249e-13	4.39275e-14
		8.29	2.33852e-13	1.31804e-14	1.98401e-13	3.474e-14	2.69566e-13	4.56641e-14
		8.31	2.31672e-13	1.28917e-14	1.99358e-13	3.26541e-14	2.62877e-13	4.19587e-14
		8.33	2.31626e-13	1.23115e-14	1.92759e-13	3.52229e-14	2.66014e-13	4.20725e-14
		8.35	2.29587e-13	1.50361e-14	1.97005e-13	3.65278e-14	2.6842e-13	4.43836e-14
		8.37	2.24981e-13	1.47773e-14	1.96048e-13	3.32981e-14	2.62612e-13	3.98771e-14
		8.39	2.28512e-13	1.27578e-14	1.97229e-13	3.48319e-14	2.63945e-13	4.38e-14
		8.41	2.29624e-13	1.5173e-14	1.92264e-13	3.4867e-14	2.64979e-13	4.49826e-14
		8.43	2.23589e-13	1.53187e-14	1.95775e-13	3.3632e-14	2.6398e-13	4.6559e-14
		8.45	2.21924e-13	1.53952e-14	1.97029e-13	3.37581e-14	2.62632e-13	4.52298e-14
		8.47	2.28809e-13	1.05758e-14	1.93885e-13	3.51315e-14	2.64044e-13	4.18756e-14
		8.49	2.22673e-13	1.64269e-14	1.95593e-13	3.4161e-14	2.65634e-13	4.58972e-14
		8.51	2.17814e-13	1.62648e-14	1.90508e-13	3.34688e-14	2.61531e-13	4.42243e-14
		8.53	2.12988e-13	1.63302e-14	1.89249e-13	3.37298e-14	2.59464e-13	4.2435e-14
		8.55	2.13051e-13	1.72037e-14	1.88134e-13	3.40148e-14	2.59242e-13	4.39078e-14
		8.57	2.20187e-13	1.36047e-14	1.9136e-13	3.2762e-14	2.57069e-13	4.24632e-14
		8.59	2.15527e-13	1.30591e-14	1.91321e-13	3.1607e-14	2.5568e-13	4.20253e-14
		8.61	2.18731e-13	1.44146e-14	1.93071e-13	3.41337e-14	2.60306e-13	4.36943e-14
		8.63	2.15691e-13	1.44916e-14	1.92967e-13	3.20207e-14	2.59679e-13	4.43269e-14
		8.65	2.15199e-13	1.6475e-14	1.91967e-13	3.13401e-14	2.6072e-13	4.35185e-14
		8.67	2.17192e-13	1.33888e-14	1.96534e-13	3.08885e-14	2.57077e-13	4.09735e-14
		8.69	2.14838e-13	1.67994e-14	1.91636e-13	3.34087e-14	2.59347e-13	4.45957e-14
		8.71	2.0477e-13	1.77382e-14	1.92143e-13	3.25977e-14	2.57021e-13	4.12417e-14
		8.73	2.15705e-13	1.16816e-14	1.92033e-13	3.28721e-14	2.55566e-13	4.09005e-14
		8.75	2.14191e-13	1.31676e-14	1.93694e-13	3.19532e-14	2.59017e-13	4.26732e-14
		8.77	2.09356e-13	1.28195e-14	1.89455e-13	3.22226e-14	2.54916e-13	4.01932e-14
		8.79	2.08924e-13	1.29655e-14	1.87229e-13	3.27967e-14	2.54083e-13	4.13348e-14
		8.81	2.14368e-13	1.00689e-14	1.93315e-13	3.10724e-14	2.5904e-13	4.22483e-14
		8.83	2.10957e-13	1.277e-14	1.91376e-13	3.15182e-14	2.53396e-13	4.00551e-14
		8.85	2.09635e-13	1.31524e-14	1.8883e-13	3.13441e-14	2.51031e-13	4.22295e-14
		8.87	2.07664e-13	1.23875e-14	1.86099e-13	3.20575e-14	2.50571e-13	4.07189e-14
		8.89	2.10791e-13	1.30237e-14	1.87293e-13	3.21077e-14	2.51803e-13	3.99178e-14
		8.91	2.14053e-13	1.3171e-14	1.87219e-13	2.89914e-14	2.516e-13	4.07959e-14
		8.93	2.11826e-13	1.3673e-14	1.80447e-13	2.99349e-14	2.46946e-13	3.99044e-14
		8.95	2.08797e-13	1.29898e-14	1.87639e-13	3.10987e-14	2.50478e-13	3.98998e-14
		8.97	2.10395e-13	1.36731e-14	1.84653e-13	2.98005e-14	2.43896e-13	3.98655e-14
		8.99	1.96879e-13	1.54471e-14	1.80128e-13	3.12044e-14	2.51942e-13	4.0334e-14
		9.01	1.9937e-13	1.48276e-14	1.80048e-13	3.29431e-14	2.53008e-13	3.95346e-14
		9.03	2.02981e-13	1.24073e-14	1.81661e-13	3.02632e-14	2.51084e-13	4.10402e-14
		9.05	2.03341e-13	1.4009e-14	1.83425e-13	2.93772e-14	2.44116e-13	3.87695e-14
		9.07	2.03118e-13	1.20186e-14	1.81518e-13	3.17459e-14	2.44928e-13	3.88534e-14
		9.09	1.95111e-13	1.20729e-14	1.74519e-13	3.02593e-14	2.46276e-13	4.12757e-14
		9.11	1.9377e-13	1.17746e-14	1.74734e-13	3.10102e-14	2.44628e-13	4.01221e-14
		9.13	2.01692e-13	1.18305e-14	1.78203e-13	3.22228e-14	2.40976e-13	3.99855e-14
		9.15	1.9771e-13	1.27949e-14	1.785e-13	2.73626e-14	2.40032e-13	3.94575e-14
		9.17	1.95193e-13	1.32437e-14	1.81475e-13	2.85151e-14	2.39477e-13	3.89008e-14
		9.19	1.96669e-13	1.32591e-14	1.73554e-13	3.00195e-14	2.40323e-13	3.7828e-14
		9.21	1.92244e-13	1.41411e-14	1.77104e-13	3.15135e-14	2.38694e-13	3.9555e-14
		9.23	2.04316e-13	9.14866e-15	1.78182e-13	3.15094e-14	2.40742e-13	4.08908e-14
		9.25	1.91086e-13	1.23394e-14	1.70236e-13	2.8903e-14	2.39589e-13	4.07176e-14
		9.27	1.97323e-13	1.41965e-14	1.72839e-13	2.92279e-14	2.42353e-13	3.7693e-14
		9.29	1.94989e-13	1.32888e-14	1.72854e-13	3.07951e-14	2.33351e-13	3.73614e-14
		9.31	1.89652e-13	1.5662e-14	1.76233e-13	3.01355e-14	2.35161e-13	3.72893e-14
		9.33	1.9818e-13	1.10881e-14	1.75658e-13	2.92011e-14	2.33851e-13	3.75633e-14
		9.35	1.94529e-13	1.32019e-14	1.72085e-13	3.06787e-14	2.36284e-13	3.91636e-14
		9.37	1.89142e-13	1.32368e-14	1.75527e-13	2.90079e-14	2.36437e-13	3.70788e-14
		9.39	1.91679e-13	1.29972e-14	1.75016e-13	2.93212e-14	2.31232e-13	3.70509e-14
		9.41	1.8968e-13	1.31491e-14	1.72594e-13	3.01897e-14	2.36183e-13	3.79621e-14
		9.43	1.88282e-13	1.33135e-14	1.75258e-13	2.85607e-14	2.36309e-13	3.85193e-14
		9.45	1.86801e-13	1.60691e-14	1.74521e-13	2.72076e-14	2.35532e-13	4.10195e-14
		9.47	1.88292e-13	1.24865e-14	1.68295e-13	2.8395e-14	2.35655e-13	3.71892e-14
		9.49	1.92843e-13	1.34661e-14	1.70739e-13	2.9719e-14	2.32318e-13	3.69573e-14
		9.51	1.90956e-13	1.52013e-14	1.70998e-13	2.91506e-14	2.35645e-13	3.86481e-14
		9.53	1.88036e-13	1.45121e-14	1.73194e-13	2.80731e-14	2.35642e-13	3.82973e-14
		9.55	1.79074e-13	1.5187e-14	1.69029e-13	2.97043e-14	2.26669e-13	3.63234e-14
		9.57	1.79705e-13	1.32129e-14	1.67859e-13	2.77563e-14	2.29988e-13	3.89436e-14
		9.59	1.87126e-13	1.47725e-14	1.66105e-13	2.85147e-14	2.25231e-13	3.45419e-14
		9.61	1.8498e-13	1.46498e-14	1.67394e-13	2.94754e-14	2.27987e-13	3.64115e-14
		9.63	1.8618e-13	1.44068e-14	1.6906e-13	2.76616e-14	2.27384e-13	3.44222e-14
		9.65	1.81071e-13	1.58262e-14	1.66356e-13	2.77033e-14	2.2687e-13	3.78365e-14
		9.67	1.81571e-13	1.26887e-14	1.65922e-13	2.74859e-14	2.25071e-13	3.60949e-14
		9.69	1.8127e-13	1.58427e-14	1.64426e-13	2.61685e-14	2.28345e-13	3.69053e-14
		9.71	1.77566e-13	1.40818e-14	1.67381e-13	2.8046e-14	2.28209e-13	3.81375e-14
		9.73	1.77219e-13	1.30869e-14	1.66515e-13	2.86271e-14	2.25025e-13	3.64966e-14
		9.75	1.77869e-13	1.39121e-14	1.62604e-13	2.85386e-14	2.24893e-13	3.70806e-14
		9.77	1.82516e-13	1.36583e-14	1.61855e-13	2.99526e-14	2.23729e-13	3.38916e-14
		9.79	1.80322e-13	1.23391e-14	1.61789e-13	2.72251e-14	2.27404e-13	3.5305e-14
		9.81	1.76404e-13	1.3216e-14	1.6058e-13	2.78984e-14	2.24905e-13	3.44637e-14
		9.83	1.79041e-13	1.39238e-14	1.63517e-13	2.87342e-14	2.25454e-13	3.5251e-14
		9.85	1.7554e-13	1.27196e-14	1.61461e-13	2.7468e-14	2.2512e-13	3.68628e-14
		9.87	1.7785e-13	1.15495e-14	1.63956e-13	2.85227e-14	2.24779e-13	3.47007e-14
		9.89	1.74195e-13	1.2699e-14	1.62702e-13	2.80072e-14	2.25057e-13	3.58569e-14
		9.91	1.77197e-13	1.21254e-14	1.66078e-13	2.84163e-14	2.22052e-13	3.44024e-14
		9.93	1.78796e-13	1.14959e-14	1.62827e-13	2.65492e-14	2.20721e-13	3.29903e-14
		9.95	1.71931e-13	1.41555e-14	1.55665e-13	2.86394e-14	2.17417e-13	3.38489e-14
		9.97	1.80093e-13	1.39021e-14	1.64692e-13	2.71153e-14	2.25741e-13	3.34334e-14
		9.99	1.73363e-13	1.53531e-14	1.61813e-13	2.89027e-14	2.19361e-13	3.37686e-14
		10.01	1.80678e-13	1.26824e-14	1.59355e-13	2.96772e-14	2.21511e-13	3.3142e-14
		10.03	1.73873e-13	1.58271e-14	1.5999e-13	2.76506e-14	2.14546e-13	3.21392e-14
		10.05	1.81099e-13	1.20529e-14	1.6581e-13	2.62972e-14	2.18065e-13	3.40281e-14
		10.07	1.74319e-13	1.46722e-14	1.7198e-13	2.90783e-14	2.17082e-13	3.31973e-14
		10.09	1.76017e-13	1.27371e-14	1.64807e-13	2.89025e-14	2.16411e-13	3.26598e-14
		10.11	1.69178e-13	1.50832e-14	1.6115e-13	2.76671e-14	2.10883e-13	3.13883e-14
		10.13	1.77403e-13	1.5342e-14	1.5998e-13	2.7396e-14	2.14038e-13	3.28914e-14
		10.15	1.68992e-13	1.44021e-14	1.54393e-13	2.631e-14	2.18238e-13	3.46615e-14
		10.17	1.67842e-13	1.39508e-14	1.56712e-13	2.45956e-14	2.15381e-13	3.28638e-14
		10.19	1.74426e-13	1.03735e-14	1.56162e-13	2.65614e-14	2.11149e-13	3.09857e-14
		10.21	1.75013e-13	1.21997e-14	1.56221e-13	2.66697e-14	2.12403e-13	3.37378e-14
		10.23	1.7235e-13	1.52802e-14	1.53987e-13	2.55102e-14	2.13924e-13	3.41956e-14
		10.25	1.64698e-13	1.69072e-14	1.56568e-13	2.46107e-14	2.12605e-13	3.3011e-14
		10.27	1.77368e-13	1.3457e-14	1.51485e-13	2.51944e-14	2.10484e-13	3.30422e-14
		10.29	1.67695e-13	1.30189e-14	1.50041e-13	2.62786e-14	2.11841e-13	3.37014e-14
		10.31	1.70705e-13	1.27685e-14	1.54702e-13	2.37568e-14	2.17426e-13	3.64745e-14
		10.33	1.70323e-13	1.38241e-14	1.5224e-13	2.50599e-14	2.09629e-13	3.21309e-14
		10.35	1.6807e-13	1.46288e-14	1.57283e-13	2.48264e-14	2.12056e-13	3.36174e-14
		10.37	1.69739e-13	1.32892e-14	1.57172e-13	2.44632e-14	2.1032e-13	3.4421e-14
		10.39	1.66439e-13	1.12021e-14	1.5365e-13	2.51194e-14	2.07103e-13	3.74374e-14
		10.41	1.73709e-13	1.1171e-14	1.44407e-13	2.47877e-14	2.07149e-13	3.57854e-14
		10.43	1.6867e-13	1.20236e-14	1.4987e-13	2.731e-14	2.05082e-13	3.50279e-14
		10.45	1.65343e-13	1.48289e-14	1.42067e-13	2.63371e-14	2.06091e-13	3.46043e-14
		10.47	1.67123e-13	1.41989e-14	1.44549e-13	2.23052e-14	2.05176e-13	3.51072e-14
		10.49	1.66018e-13	1.14733e-14	1.48954e-13	2.36198e-14	2.03686e-13	3.62376e-14
		10.51	1.60449e-13	1.54881e-14	1.50755e-13	2.54584e-14	2.12093e-13	3.70558e-14
		10.53	1.64164e-13	1.21672e-14	1.4611e-13	2.5026e-14	2.07605e-13	3.93365e-14
		10.55	1.64323e-13	1.26395e-14	1.42663e-13	2.53882e-14	2.05439e-13	3.72676e-14
		10.57	1.62895e-13	1.35895e-14	1.44484e-13	2.69822e-14	2.08098e-13	3.75278e-14
		10.59	1.62833e-13	1.20682e-14	1.4542e-13	2.70601e-14	2.07348e-13	3.83941e-14
		10.61	1.65282e-13	1.35429e-14	1.45418e-13	2.52445e-14	2.09697e-13	3.59964e-14
		10.63	1.57112e-13	1.44047e-14	1.44731e-13	2.44853e-14	2.06598e-13	3.37579e-14
		10.65	1.62068e-13	1.55142e-14	1.4116e-13	2.44179e-14	2.07494e-13	3.672e-14
		10.67	1.57116e-13	1.45697e-14	1.43087e-13	2.35585e-14	2.06744e-13	3.74934e-14
		10.69	1.58249e-13	1.49508e-14	1.44795e-13	2.51052e-14	2.03381e-13	3.49348e-14
		10.71	1.59833e-13	1.24489e-14	1.43712e-13	2.50111e-14	2.07526e-13	3.92951e-14
		10.73	1.60146e-13	1.33925e-14	1.4157e-13	2.62203e-14	2.07792e-13	3.70178e-14
		10.75	1.60805e-13	1.26575e-14	1.43438e-13	2.50466e-14	2.04504e-13	3.64669e-14
		10.77	1.64101e-13	1.18879e-14	1.46165e-13	2.61866e-14	2.03324e-13	3.47539e-14
		10.79	1.61881e-13	1.03522e-14	1.42314e-13	2.4118e-14	2.00562e-13	3.31357e-14
		10.81	1.72903e-13	1.13924e-14	1.47086e-13	2.51453e-14	2.04232e-13	3.58593e-14
		10.83	1.5751e-13	1.1553e-14	1.44326e-13	2.38963e-14	2.01746e-13	3.61961e-14
		10.85	1.54638e-13	1.1669e-14	1.41521e-13	2.57883e-14	2.02685e-13	3.39057e-14
		10.87	1.64659e-13	1.30131e-14	1.41575e-13	2.39061e-14	1.98808e-13	3.44837e-14
		10.89	1.56969e-13	1.28266e-14	1.36908e-13	2.59195e-14	1.95016e-13	3.39535e-14
		10.91	1.58312e-13	1.52891e-14	1.40292e-13	2.43349e-14	2.04236e-13	3.51593e-14
		10.93	1.5189e-13	1.21163e-14	1.4049e-13	2.50042e-14	2.00652e-13	3.3937e-14
		10.95	1.53795e-13	1.23889e-14	1.4023e-13	2.56702e-14	1.9996e-13	3.23637e-14
		10.97	1.54865e-13	1.26423e-14	1.38191e-13	2.40017e-14	1.983e-13	3.29287e-14
		10.99	1.56049e-13	1.44201e-14	1.40385e-13	2.32326e-14	2.03814e-13	3.37098e-14
		11.01	1.60238e-13	1.36431e-14	1.43889e-13	2.49173e-14	2.0061e-13	3.3184e-14
		11.03	1.56803e-13	1.39721e-14	1.39809e-13	2.59904e-14	2.01899e-13	3.34169e-14
		11.05	1.56578e-13	1.20568e-14	1.43132e-13	2.36869e-14	1.99989e-13	3.08451e-14
		11.07	1.52556e-13	1.15859e-14	1.3538e-13	2.29413e-14	2.00271e-13	3.32622e-14
		11.09	1.4876e-13	1.37215e-14	1.41213e-13	2.79229e-14	1.95313e-13	3.16736e-14
		11.11	1.5741e-13	1.31344e-14	1.38179e-13	2.73796e-14	2.0186e-13	3.57708e-14
		11.13	1.52788e-13	1.25856e-14	1.37657e-13	2.8193e-14	1.97653e-13	3.15621e-14
		11.15	1.53577e-13	1.25883e-14	1.38578e-13	2.5607e-14	1.9388e-13	3.43216e-14
		11.17	1.44184e-13	1.28236e-14	1.38613e-13	2.4637e-14	1.98505e-13	3.43274e-14
		11.19	1.51064e-13	7.93373e-15	1.36897e-13	2.48102e-14	1.93151e-13	3.12014e-14
		11.21	1.46461e-13	1.31967e-14	1.39538e-13	2.36167e-14	1.93131e-13	3.33982e-14
		11.23	1.51614e-13	1.19788e-14	1.38464e-13	2.46022e-14	1.96441e-13	3.47358e-14
		11.25	1.51938e-13	1.18722e-14	1.39298e-13	2.30679e-14	1.97831e-13	3.28894e-14
		11.27	1.42087e-13	1.13608e-14	1.42006e-13	2.32385e-14	1.98709e-13	3.38662e-14
		11.29	1.41561e-13	1.16011e-14	1.394e-13	2.2736e-14	1.92878e-13	3.46468e-14
		11.31	1.47787e-13	1.17435e-14	1.37127e-13	2.40824e-14	1.91589e-13	3.32426e-14
		11.33	1.44875e-13	1.0849e-14	1.33398e-13	2.47286e-14	1.92704e-13	3.39389e-14
		11.35	1.46026e-13	1.16387e-14	1.36339e-13	2.47093e-14	1.93879e-13	3.46379e-14
		11.37	1.44398e-13	1.07372e-14	1.36856e-13	2.26402e-14	1.90385e-13	3.10891e-14
		11.39	1.4708e-13	1.09256e-14	1.36567e-13	2.49119e-14	1.86542e-13	3.1449e-14
		11.41	1.4321e-13	1.20752e-14	1.31978e-13	2.43064e-14	1.9178e-13	3.35043e-14
		11.43	1.44897e-13	1.10179e-14	1.33079e-13	2.35077e-14	1.94013e-13	3.5532e-14
		11.45	1.43504e-13	1.03679e-14	1.33151e-13	2.53557e-14	1.9224e-13	3.55064e-14
		11.47	1.41954e-13	1.24393e-14	1.31777e-13	2.62384e-14	1.90955e-13	3.44792e-14
		11.49	1.38328e-13	1.17829e-14	1.36123e-13	2.47526e-14	1.89942e-13	3.26483e-14
		11.51	1.41427e-13	1.10556e-14	1.33928e-13	2.23928e-14	1.88317e-13	3.40742e-14
		11.53	1.37714e-13	1.25314e-14	1.34262e-13	2.32344e-14	1.85187e-13	3.20942e-14
		11.55	1.43916e-13	9.77704e-15	1.3423e-13	2.2385e-14	1.87023e-13	3.52232e-14
		11.57	1.40148e-13	1.31944e-14	1.34814e-13	2.36704e-14	1.90726e-13	3.81941e-14
		11.59	1.33363e-13	1.15318e-14	1.33041e-13	2.43387e-14	1.89387e-13	3.64398e-14
		11.61	1.34769e-13	1.05819e-14	1.31841e-13	2.31703e-14	1.82752e-13	3.50373e-14
		11.63	1.36472e-13	1.24615e-14	1.28303e-13	2.13593e-14	1.84776e-13	3.44388e-14
		11.65	1.37361e-13	1.29539e-14	1.2767e-13	2.3949e-14	1.81983e-13	3.60519e-14
		11.67	1.41451e-13	1.20156e-14	1.26039e-13	2.07897e-14	1.81107e-13	3.46849e-14
		11.69	1.33757e-13	1.39125e-14	1.24729e-13	2.3142e-14	1.81799e-13	3.6998e-14
		11.71	1.36585e-13	1.25101e-14	1.26832e-13	2.28329e-14	1.79358e-13	3.30905e-14
		11.73	1.37419e-13	1.39318e-14	1.28707e-13	2.34028e-14	1.78904e-13	3.47535e-14
		11.75	1.39594e-13	1.04174e-14	1.35275e-13	2.20503e-14	1.76679e-13	3.38951e-14
		11.77	1.39616e-13	1.22708e-14	1.32708e-13	2.12023e-14	1.79616e-13	3.56381e-14
		11.79	1.41999e-13	1.43011e-14	1.28193e-13	2.23758e-14	1.70417e-13	3.51063e-14
		11.81	1.33887e-13	1.3288e-14	1.30399e-13	2.19179e-14	1.74524e-13	3.49219e-14
		11.83	1.36312e-13	1.04304e-14	1.32715e-13	2.32083e-14	1.72375e-13	3.66608e-14
		11.85	1.35257e-13	1.3888e-14	1.22723e-13	2.47275e-14	1.73009e-13	3.52554e-14
		11.87	1.37223e-13	1.25482e-14	1.26783e-13	2.20815e-14	1.73712e-13	3.67652e-14
		11.89	1.35833e-13	1.07882e-14	1.25867e-13	2.24344e-14	1.74726e-13	3.50011e-14
		11.91	1.31599e-13	1.40858e-14	1.27259e-13	2.27551e-14	1.74779e-13	3.61061e-14
		11.93	1.39447e-13	1.08702e-14	1.30639e-13	2.14073e-14	1.72496e-13	3.53226e-14
		11.95	1.36064e-13	1.37327e-14	1.23331e-13	2.11098e-14	1.72595e-13	3.38091e-14
		11.97	1.34601e-13	1.32764e-14	1.2658e-13	2.12976e-14	1.7482e-13	3.6481e-14
		11.99	1.28852e-13	1.04708e-14	1.23921e-13	2.19756e-14	1.72234e-13	3.35853e-14
		12.01	1.37227e-13	1.14316e-14	1.30886e-13	1.95504e-14	1.68588e-13	3.3249e-14
		12.03	1.33435e-13	1.172e-14	1.32458e-13	2.16334e-14	1.68603e-13	3.28043e-14
		12.05	1.36477e-13	1.22299e-14	1.21347e-13	2.12048e-14	1.69241e-13	3.20297e-14
		12.07	1.33401e-13	1.17667e-14	1.19018e-13	2.06994e-14	1.72835e-13	3.31106e-14
		12.09	1.30794e-13	1.11341e-14	1.16269e-13	2.26905e-14	1.65052e-13	3.34303e-14
		12.11	1.30124e-13	9.71934e-15	1.19268e-13	1.96289e-14	1.67447e-13	3.18296e-14
		12.13	1.35263e-13	1.15621e-14	1.23304e-13	2.16584e-14	1.71578e-13	3.56563e-14
		12.15	1.31531e-13	1.03063e-14	1.26231e-13	1.98007e-14	1.69353e-13	3.28965e-14
		12.17	1.32593e-13	1.10556e-14	1.24575e-13	2.05235e-14	1.6654e-13	3.48213e-14
		12.19	1.29164e-13	1.22994e-14	1.2656e-13	1.8828e-14	1.65644e-13	3.1359e-14
		12.21	1.31485e-13	1.22953e-14	1.20083e-13	2.05941e-14	1.67069e-13	3.38964e-14
		12.23	1.21873e-13	1.2357e-14	1.21716e-13	2.2964e-14	1.67083e-13	3.56218e-14
		12.25	1.23175e-13	1.16041e-14	1.24376e-13	2.0992e-14	1.6314e-13	2.98098e-14
		12.27	1.23542e-13	1.05075e-14	1.19941e-13	2.07876e-14	1.64835e-13	3.34867e-14
		12.29	1.24818e-13	1.19117e-14	1.16962e-13	2.13069e-14	1.63083e-13	3.05797e-14
		12.31	1.27786e-13	1.47211e-14	1.19955e-13	1.90003e-14	1.63756e-13	3.11437e-14
		12.33	1.24004e-13	9.98913e-15	1.18095e-13	2.05498e-14	1.6603e-13	3.25035e-14
		12.35	1.20935e-13	1.06498e-14	1.15909e-13	2.13415e-14	1.61244e-13	3.24739e-14
		12.37	1.25138e-13	1.05848e-14	1.15399e-13	1.84971e-14	1.66471e-13	3.4474e-14
		12.39	1.24834e-13	1.01762e-14	1.17345e-13	1.92986e-14	1.61476e-13	3.121e-14
		12.41	1.23409e-13	1.11266e-14	1.18697e-13	1.95527e-14	1.59372e-13	3.10653e-14
		12.43	1.22537e-13	1.02769e-14	1.16249e-13	1.92891e-14	1.60993e-13	3.16955e-14
		12.45	1.21778e-13	1.42133e-14	1.19479e-13	2.09992e-14	1.61144e-13	3.12581e-14
		12.47	1.21561e-13	1.27415e-14	1.15196e-13	2.07125e-14	1.5657e-13	3.17412e-14
		12.49	1.26029e-13	1.17707e-14	1.12608e-13	1.8383e-14	1.55165e-13	3.04271e-14
		12.51	1.30064e-13	1.06847e-14	1.14127e-13	1.78787e-14	1.58008e-13	3.29658e-14
		12.53	1.2265e-13	1.23558e-14	1.16128e-13	1.72697e-14	1.66059e-13	3.23712e-14
		12.55	1.26234e-13	1.10926e-14	1.10468e-13	2.14374e-14	1.6139e-13	3.28901e-14
		12.57	1.2321e-13	9.91595e-15	1.10276e-13	2.13162e-14	1.5831e-13	3.15328e-14
		12.59	1.19161e-13	9.85799e-15	1.14834e-13	2.1374e-14	1.52415e-13	2.99588e-14
		12.61	1.24459e-13	1.13112e-14	1.1679e-13	2.21618e-14	1.48503e-13	2.9717e-14
		12.63	1.18185e-13	1.13223e-14	1.15121e-13	1.89825e-14	1.49565e-13	3.15865e-14
		12.65	1.23757e-13	1.11967e-14	1.14675e-13	2.02874e-14	1.54003e-13	3.33776e-14
		12.67	1.19686e-13	8.17553e-15	1.14063e-13	1.99397e-14	1.54748e-13	3.11024e-14
		12.69	1.25215e-13	1.10554e-14	1.10746e-13	1.87564e-14	1.53798e-13	2.99358e-14
		12.71	1.1552e-13	1.12456e-14	1.16549e-13	2.11034e-14	1.50372e-13	2.85794e-14
		12.73	1.18838e-13	1.03655e-14	1.11347e-13	2.16684e-14	1.54097e-13	3.01843e-14
		12.75	1.14657e-13	9.29195e-15	1.15507e-13	2.26484e-14	1.46314e-13	3.01687e-14
		12.77	1.20569e-13	1.2397e-14	1.14694e-13	2.18191e-14	1.47656e-13	3.02732e-14
		12.79	1.20097e-13	1.05018e-14	1.11262e-13	2.21628e-14	1.47137e-13	3.04915e-14
		12.81	1.13631e-13	1.22997e-14	1.15083e-13	1.91446e-14	1.48521e-13	3.08999e-14
		12.83	1.19096e-13	1.05805e-14	1.04921e-13	2.02692e-14	1.49154e-13	3.06586e-14
		12.85	1.17559e-13	1.04159e-14	1.11557e-13	1.91924e-14	1.43971e-13	3.02767e-14
		12.87	1.1851e-13	9.16728e-15	1.09889e-13	1.78835e-14	1.51639e-13	3.23072e-14
		12.89	1.19897e-13	1.1015e-14	1.09299e-13	2.09756e-14	1.50019e-13	3.24117e-14
		12.91	1.17726e-13	9.89718e-15	1.13055e-13	1.91562e-14	1.46641e-13	3.07651e-14
		12.93	1.20718e-13	1.20484e-14	1.09745e-13	2.03245e-14	1.47783e-13	3.06104e-14
		12.95	1.21443e-13	1.21777e-14	1.09928e-13	2.1241e-14	1.45971e-13	2.74769e-14
		12.97	1.14724e-13	7.97413e-15	1.08057e-13	1.69205e-14	1.47613e-13	2.92104e-14
		12.99	1.18443e-13	9.47903e-15	1.0775e-13	2.03009e-14	1.43838e-13	2.77858e-14
		13.01	1.1923e-13	1.08426e-14	1.07488e-13	2.00128e-14	1.40193e-13	2.8802e-14
		13.03	1.16349e-13	1.14634e-14	1.08686e-13	2.12769e-14	1.39541e-13	3.11046e-14
		13.05	1.21374e-13	1.04954e-14	1.09916e-13	1.85565e-14	1.37731e-13	2.62191e-14
		13.07	1.13007e-13	1.18658e-14	1.09053e-13	1.96172e-14	1.43228e-13	2.90939e-14
		13.09	1.16934e-13	1.14865e-14	1.07989e-13	2.07519e-14	1.45674e-13	2.98755e-14
		13.11	1.17811e-13	1.1434e-14	1.1117e-13	2.04357e-14	1.39787e-13	2.78865e-14
		13.13	1.22468e-13	1.23856e-14	1.0975e-13	1.99874e-14	1.40074e-13	2.90294e-14
		13.15	1.17807e-13	1.07442e-14	1.09073e-13	1.9789e-14	1.37431e-13	2.84194e-14
		13.17	1.13996e-13	1.16383e-14	1.0606e-13	1.85708e-14	1.37926e-13	3.01688e-14
		13.19	1.16295e-13	9.46723e-15	1.09063e-13	2.01486e-14	1.37781e-13	2.86743e-14
		13.21	1.17648e-13	1.50095e-14	1.08022e-13	1.94664e-14	1.40576e-13	2.78551e-14
		13.23	1.18085e-13	1.58881e-14	1.11055e-13	2.10638e-14	1.38027e-13	2.96389e-14
		13.25	1.19484e-13	1.08916e-14	1.05439e-13	1.9778e-14	1.40949e-13	2.79965e-14
		13.27	1.08659e-13	1.37925e-14	1.06836e-13	2.00555e-14	1.38417e-13	2.71312e-14
		13.29	1.20235e-13	1.1707e-14	1.0451e-13	1.79018e-14	1.4155e-13	2.83588e-14
		13.31	1.13895e-13	1.3816e-14	9.947e-14	2.02936e-14	1.40821e-13	2.7688e-14
		13.33	1.082e-13	1.17394e-14	1.03589e-13	2.15058e-14	1.43718e-13	3.17528e-14
		13.35	1.16523e-13	1.23249e-14	1.03889e-13	2.23382e-14	1.37122e-13	2.87459e-14
		13.37	1.13243e-13	1.33017e-14	9.62272e-14	1.89193e-14	1.34948e-13	2.89613e-14
		13.39	1.17944e-13	1.45855e-14	1.03245e-13	1.70519e-14	1.37444e-13	2.65501e-14
		13.41	1.15454e-13	1.18772e-14	1.01113e-13	1.85176e-14	1.35397e-13	2.74619e-14
		13.43	1.15345e-13	1.1259e-14	1.02705e-13	1.79639e-14	1.38466e-13	3.01438e-14
		13.45	1.13287e-13	1.20156e-14	9.6727e-14	1.99242e-14	1.32825e-13	2.86356e-14
		13.47	1.1128e-13	1.34085e-14	9.90283e-14	1.99711e-14	1.34514e-13	2.70142e-14
		13.49	1.12538e-13	9.88932e-15	9.98143e-14	1.76737e-14	1.3818e-13	2.80517e-14
		13.51	1.08822e-13	1.23629e-14	1.00408e-13	1.82236e-14	1.3255e-13	2.61893e-14
		13.53	1.13346e-13	1.34105e-14	9.53153e-14	1.78675e-14	1.33833e-13	2.71887e-14
		13.55	1.11824e-13	1.44884e-14	9.63232e-14	1.98605e-14	1.35701e-13	2.81246e-14
		13.57	1.12048e-13	1.5987e-14	1.02376e-13	1.96714e-14	1.343e-13	2.82771e-14
		13.59	1.14008e-13	1.11497e-14	9.36653e-14	1.98085e-14	1.32666e-13	2.69802e-14
		13.61	1.16049e-13	1.25384e-14	1.01175e-13	1.90704e-14	1.35791e-13	2.65977e-14
		13.63	1.12218e-13	1.26128e-14	9.41794e-14	2.12509e-14	1.34132e-13	2.99162e-14
		13.65	1.08418e-13	1.13242e-14	9.38249e-14	1.75678e-14	1.29958e-13	2.67011e-14
		13.67	1.11213e-13	1.16676e-14	9.84469e-14	1.98319e-14	1.38157e-13	2.71694e-14
		13.69	1.14047e-13	1.44598e-14	9.83456e-14	1.8461e-14	1.37381e-13	2.85596e-14
		13.71	1.10673e-13	1.33007e-14	9.34383e-14	1.68237e-14	1.3234e-13	2.71113e-14
		13.73	1.10607e-13	1.28564e-14	9.51477e-14	2.08964e-14	1.31936e-13	2.6735e-14
		13.75	1.11004e-13	1.2639e-14	9.16297e-14	1.98073e-14	1.34172e-13	2.7155e-14
		13.77	1.0896e-13	1.19731e-14	9.04287e-14	1.81337e-14	1.3055e-13	2.7366e-14
		13.79	1.13069e-13	1.36121e-14	9.27178e-14	2.0168e-14	1.29126e-13	2.65174e-14
		13.81	1.0867e-13	1.33687e-14	9.76607e-14	1.80997e-14	1.28537e-13	2.77053e-14
		13.83	1.16067e-13	1.4418e-14	9.1888e-14	2.04962e-14	1.29259e-13	2.53496e-14
		13.85	1.0847e-13	1.05479e-14	9.15565e-14	1.78319e-14	1.29076e-13	2.76458e-14
		13.87	1.06875e-13	1.45334e-14	9.39763e-14	2.16785e-14	1.33215e-13	2.85105e-14
		13.89	1.10059e-13	1.26674e-14	9.25249e-14	1.86056e-14	1.33772e-13	2.82892e-14
		13.91	1.003e-13	1.26382e-14	8.95619e-14	1.93855e-14	1.24911e-13	2.57425e-14
		13.93	1.00878e-13	1.16775e-14	9.35758e-14	2.12498e-14	1.23913e-13	2.66505e-14
		13.95	1.09607e-13	1.20928e-14	9.51712e-14	1.76513e-14	1.31737e-13	2.82517e-14
		13.97	9.9033e-14	9.10902e-15	9.24502e-14	1.8166e-14	1.24663e-13	2.54124e-14
		13.99	1.10909e-13	1.38745e-14	9.56958e-14	1.92267e-14	1.27184e-13	2.91172e-14
		14.01	1.08085e-13	1.07889e-14	9.02629e-14	1.86268e-14	1.22917e-13	2.62579e-14
		14.03	1.01011e-13	1.26573e-14	9.50192e-14	1.78956e-14	1.24182e-13	2.68188e-14
		14.05	1.09798e-13	1.41923e-14	9.38287e-14	2.10188e-14	1.23025e-13	2.70956e-14
		14.07	1.05554e-13	1.25666e-14	8.94722e-14	1.86601e-14	1.26416e-13	2.92373e-14
		14.09	1.04157e-13	1.14905e-14	9.2938e-14	1.83071e-14	1.26067e-13	2.78578e-14
		14.11	1.05905e-13	1.33422e-14	9.30071e-14	1.86663e-14	1.24936e-13	2.67874e-14
		14.13	1.0569e-13	1.29388e-14	9.70022e-14	2.10608e-14	1.28593e-13	2.69683e-14
		14.15	1.05073e-13	1.36104e-14	9.5162e-14	1.87531e-14	1.26146e-13	2.84605e-14
		14.17	1.03623e-13	1.31484e-14	9.28929e-14	1.92017e-14	1.21927e-13	2.71122e-14
		14.19	1.12722e-13	1.46186e-14	8.96547e-14	1.96228e-14	1.23745e-13	2.59198e-14
		14.21	1.05194e-13	1.29176e-14	9.38643e-14	1.73037e-14	1.28695e-13	2.9795e-14
		14.23	1.05543e-13	1.2054e-14	9.28928e-14	1.77223e-14	1.28203e-13	2.87583e-14
		14.25	1.04919e-13	1.18605e-14	9.26716e-14	1.82664e-14	1.27396e-13	3.03258e-14
		14.27	1.04335e-13	1.51423e-14	8.94473e-14	1.82875e-14	1.22502e-13	2.80337e-14
		14.29	1.09341e-13	1.64879e-14	8.71054e-14	1.8512e-14	1.20671e-13	2.8469e-14
		14.31	1.03409e-13	1.45803e-14	8.69606e-14	2.03281e-14	1.22661e-13	2.8506e-14
		14.33	1.07688e-13	1.43886e-14	8.63187e-14	1.91498e-14	1.15185e-13	2.51851e-14
		14.35	1.05107e-13	1.65372e-14	8.88048e-14	1.91427e-14	1.19127e-13	2.80039e-14
		14.37	1.07092e-13	1.77909e-14	8.93328e-14	2.01383e-14	1.19065e-13	2.56538e-14
		14.39	9.80455e-14	1.31758e-14	8.06742e-14	2.03427e-14	1.17828e-13	2.55374e-14
		14.41	1.01815e-13	1.35159e-14	8.25698e-14	1.79571e-14	1.22434e-13	2.96998e-14
		14.43	1.01687e-13	1.63486e-14	8.66143e-14	1.82792e-14	1.18012e-13	2.68192e-14
		14.45	9.61116e-14	1.37843e-14	8.41619e-14	1.90739e-14	1.15045e-13	2.62485e-14
		14.47	1.02755e-13	1.74779e-14	8.37711e-14	1.89268e-14	1.11143e-13	2.61431e-14
		14.49	1.00889e-13	1.28679e-14	8.16168e-14	1.86313e-14	1.09511e-13	2.53333e-14
		14.51	1.01563e-13	1.19602e-14	8.48778e-14	1.75444e-14	1.14633e-13	2.44364e-14
		14.53	9.82623e-14	1.31357e-14	8.07948e-14	1.94051e-14	1.1522e-13	2.88308e-14
		14.55	1.07332e-13	1.38159e-14	8.31249e-14	1.91644e-14	1.20955e-13	2.91242e-14
		14.57	9.22955e-14	1.42317e-14	8.35507e-14	1.90793e-14	1.12312e-13	2.62479e-14
		14.59	9.22945e-14	1.48784e-14	7.88722e-14	1.76483e-14	1.13892e-13	2.93912e-14
		14.61	9.7783e-14	1.30691e-14	8.15868e-14	1.63871e-14	1.14568e-13	2.59745e-14
		14.63	1.02512e-13	1.25776e-14	7.57658e-14	1.63401e-14	1.11807e-13	2.57864e-14
		14.65	9.21757e-14	1.36704e-14	7.92555e-14	2.10582e-14	1.14062e-13	2.7968e-14
		14.67	9.49519e-14	1.17338e-14	8.04653e-14	1.80527e-14	1.14979e-13	2.7764e-14
		14.69	9.52318e-14	1.23524e-14	7.98946e-14	1.75152e-14	1.11375e-13	2.54251e-14
		14.71	9.41221e-14	1.37126e-14	7.80107e-14	1.96848e-14	1.17059e-13	2.82813e-14
		14.73	8.94456e-14	1.05438e-14	7.36792e-14	1.97414e-14	1.10752e-13	2.79819e-14
		14.75	9.3719e-14	1.56876e-14	8.11289e-14	1.77523e-14	1.113e-13	2.79213e-14
		14.77	9.05448e-14	1.53673e-14	7.90894e-14	1.93564e-14	1.11383e-13	2.65283e-14
		14.79	9.80408e-14	1.40137e-14	7.69696e-14	2.26452e-14	1.11462e-13	2.73338e-14
		14.81	9.52783e-14	1.47007e-14	7.80558e-14	1.95921e-14	1.08182e-13	2.63389e-14
		14.83	9.99562e-14	1.51497e-14	7.71809e-14	2.10773e-14	1.04533e-13	2.71065e-14
		14.85	8.74527e-14	1.27749e-14	7.67594e-14	1.6833e-14	1.11334e-13	2.71472e-14
		14.87	9.93797e-14	1.59318e-14	7.28356e-14	2.0916e-14	1.10028e-13	2.70233e-14
		14.89	9.31809e-14	1.42287e-14	7.72062e-14	1.69015e-14	1.12843e-13	2.65204e-14
		14.91	9.31629e-14	1.683e-14	8.11258e-14	1.97953e-14	1.09663e-13	2.54558e-14
		14.93	9.44196e-14	1.4128e-14	7.55187e-14	1.89104e-14	1.1305e-13	2.60755e-14
		14.95	9.45447e-14	1.48692e-14	7.99306e-14	1.8285e-14	1.11814e-13	2.56347e-14
		14.97	8.91296e-14	1.25455e-14	7.65535e-14	1.84257e-14	1.13439e-13	2.69232e-14
		14.99	9.57047e-14	1.59017e-14	7.95606e-14	2.08008e-14	1.07738e-13	2.79021e-14
		15.01	9.22015e-14	1.40622e-14	7.69722e-14	1.7866e-14	1.10225e-13	2.78143e-14
		15.03	9.20188e-14	1.55942e-14	6.70743e-14	2.03178e-14	1.07329e-13	2.57437e-14
		15.05	9.38108e-14	1.69048e-14	7.61632e-14	1.79043e-14	1.09228e-13	2.70982e-14
		15.07	8.88999e-14	1.5893e-14	6.84811e-14	1.81215e-14	1.10381e-13	2.79069e-14
		15.09	8.80911e-14	1.49086e-14	7.35583e-14	1.88624e-14	1.07323e-13	2.47992e-14
		15.11	9.31203e-14	1.238e-14	7.04668e-14	1.92306e-14	1.06455e-13	2.8032e-14
		15.13	9.36893e-14	1.47683e-14	7.08482e-14	1.87612e-14	1.04101e-13	2.68613e-14
		15.15	9.47815e-14	1.67667e-14	7.16794e-14	1.73131e-14	1.08397e-13	2.88385e-14
		15.17	8.86887e-14	1.49535e-14	7.64021e-14	1.95547e-14	1.04535e-13	2.50369e-14
		15.19	8.55768e-14	1.53194e-14	7.21446e-14	1.93381e-14	1.03105e-13	2.53079e-14
		15.21	9.19515e-14	1.48144e-14	7.23723e-14	2.10563e-14	1.06874e-13	2.99748e-14
		15.23	9.01996e-14	1.30421e-14	7.44508e-14	1.96508e-14	1.07951e-13	2.87929e-14
		15.25	9.15322e-14	1.71075e-14	7.55937e-14	1.86665e-14	1.10258e-13	2.98514e-14
		15.27	8.72789e-14	1.36922e-14	6.28299e-14	2.04542e-14	1.09857e-13	2.91851e-14
		15.29	8.73749e-14	1.40348e-14	6.71072e-14	1.62512e-14	1.07839e-13	2.98702e-14
		15.31	9.25921e-14	1.70353e-14	7.42962e-14	1.78353e-14	1.0463e-13	3.02818e-14
		15.33	8.80709e-14	1.45109e-14	6.99497e-14	1.82593e-14	1.08046e-13	2.91659e-14
		15.35	8.98472e-14	1.57627e-14	7.21489e-14	1.82266e-14	1.06963e-13	2.96869e-14
		15.37	8.37045e-14	1.49835e-14	7.10805e-14	1.66461e-14	1.05904e-13	3.13976e-14
		15.39	8.14537e-14	1.55915e-14	6.73668e-14	1.81711e-14	1.03271e-13	3.12376e-14
		15.41	8.9808e-14	1.27232e-14	7.24051e-14	1.72533e-14	1.02707e-13	2.88249e-14
		15.43	8.41723e-14	1.36511e-14	6.61896e-14	1.72581e-14	1.02553e-13	2.9936e-14
		15.45	8.51599e-14	1.43208e-14	6.88514e-14	1.79606e-14	1.03435e-13	2.98326e-14
		15.47	8.26805e-14	1.72262e-14	7.04578e-14	1.6461e-14	1.00857e-13	3.10515e-14
		15.49	8.51788e-14	1.42463e-14	6.58424e-14	1.70438e-14	1.03569e-13	3.03595e-14
		15.51	9.15952e-14	1.56925e-14	6.71972e-14	1.89207e-14	1.0213e-13	3.05003e-14
		15.53	7.86619e-14	1.20985e-14	6.65409e-14	1.81007e-14	1.02142e-13	2.92097e-14
		15.55	8.21145e-14	1.32037e-14	6.79929e-14	1.80054e-14	1.0038e-13	2.99127e-14
		15.57	9.01286e-14	1.67099e-14	6.92261e-14	1.60949e-14	9.83349e-14	2.84298e-14
		15.59	8.18005e-14	1.33328e-14	6.82251e-14	2.0548e-14	1.05319e-13	3.08868e-14
		15.61	9.09153e-14	1.81797e-14	6.79041e-14	1.69733e-14	1.00409e-13	2.70031e-14
		15.63	8.10392e-14	1.54038e-14	7.27458e-14	1.67966e-14	9.97917e-14	2.57832e-14
		15.65	7.98386e-14	1.44328e-14	6.70419e-14	1.71892e-14	1.03689e-13	2.62161e-14
		15.67	7.95082e-14	1.47447e-14	6.58663e-14	1.80881e-14	1.0129e-13	2.83978e-14
		15.69	8.31567e-14	1.70557e-14	6.30024e-14	1.7062e-14	1.02658e-13	2.76918e-14
		15.71	7.82424e-14	1.16357e-14	6.86556e-14	1.64437e-14	9.80874e-14	2.63268e-14
		15.73	8.51382e-14	1.52949e-14	5.91625e-14	2.14301e-14	1.00093e-13	2.68536e-14
		15.75	8.28932e-14	1.5421e-14	6.37231e-14	1.9553e-14	1.01364e-13	2.78683e-14
		15.77	8.00563e-14	1.44548e-14	6.3756e-14	1.71125e-14	9.98657e-14	2.51211e-14
		15.79	7.67488e-14	1.26922e-14	6.3187e-14	1.87286e-14	9.72426e-14	2.44819e-14
		15.81	8.22462e-14	1.66045e-14	6.34819e-14	1.68832e-14	1.01105e-13	2.68269e-14
		15.83	8.40496e-14	1.47936e-14	6.34044e-14	1.80522e-14	1.00394e-13	2.60784e-14
		15.85	7.94177e-14	1.45114e-14	6.41927e-14	1.7773e-14	1.00285e-13	2.25651e-14
		15.87	8.4161e-14	1.54173e-14	6.22377e-14	1.64106e-14	9.9388e-14	2.48008e-14
		15.89	7.85858e-14	1.37216e-14	6.7356e-14	1.70704e-14	9.96331e-14	2.51578e-14
		15.91	7.63832e-14	1.31811e-14	6.26788e-14	1.47312e-14	1.00679e-13	2.54576e-14
		15.93	7.98981e-14	1.42854e-14	6.28749e-14	1.69575e-14	1.01897e-13	2.44665e-14
		15.95	8.20651e-14	1.57889e-14	6.19758e-14	1.59399e-14	1.05206e-13	2.54295e-14
		15.97	7.59903e-14	1.43704e-14	6.39807e-14	1.74926e-14	1.01687e-13	2.32011e-14
		15.99	7.90418e-14	1.32329e-14	6.01217e-14	1.59612e-14	1.06155e-13	2.34809e-14
		16.01	8.1478e-14	1.4652e-14	6.13973e-14	1.74867e-14	1.04311e-13	2.25509e-14
		16.03	7.45339e-14	1.154e-14	5.75646e-14	1.77792e-14	1.05415e-13	2.63238e-14
		16.05	7.75459e-14	1.39029e-14	6.28517e-14	1.54542e-14	1.07515e-13	2.53421e-14
		16.07	8.15109e-14	1.42066e-14	5.91106e-14	2.0175e-14	1.06617e-13	2.39182e-14
		16.09	7.62072e-14	1.55137e-14	6.40151e-14	1.73366e-14	1.04158e-13	2.30527e-14
		16.11	8.16762e-14	1.66164e-14	6.46012e-14	1.93269e-14	9.97874e-14	2.23383e-14
		16.13	7.28534e-14	1.33799e-14	6.27007e-14	1.78349e-14	1.04959e-13	2.33398e-14
		16.15	7.26108e-14	1.39248e-14	5.76375e-14	1.82922e-14	1.02075e-13	2.13747e-14
		16.17	7.57334e-14	1.51634e-14	6.54966e-14	1.79273e-14	1.02702e-13	2.07727e-14
		16.19	7.24392e-14	1.41289e-14	5.94631e-14	1.70725e-14	1.00338e-13	2.14468e-14
		16.21	7.55267e-14	1.44808e-14	5.74645e-14	1.54251e-14	1.01624e-13	2.43127e-14
		16.23	7.53058e-14	1.54743e-14	5.99175e-14	1.64069e-14	9.73099e-14	2.37112e-14
		16.25	7.56384e-14	1.26449e-14	6.0389e-14	1.79465e-14	9.94833e-14	2.24893e-14
		16.27	7.74915e-14	1.4686e-14	5.99576e-14	1.46618e-14	9.69185e-14	2.46304e-14
		16.29	7.71526e-14	1.43452e-14	6.14107e-14	1.68341e-14	9.78705e-14	2.21688e-14
		16.31	7.40183e-14	1.40521e-14	6.34715e-14	1.75893e-14	9.51653e-14	2.20522e-14
		16.33	8.19735e-14	1.56862e-14	5.76859e-14	1.66373e-14	9.4266e-14	2.07014e-14
		16.35	7.22298e-14	1.43519e-14	6.0329e-14	1.76965e-14	9.61856e-14	2.07931e-14
		16.37	7.66369e-14	1.36109e-14	5.44954e-14	1.75642e-14	9.3459e-14	2.26332e-14
		16.39	7.48747e-14	1.36093e-14	5.76887e-14	1.60832e-14	9.62964e-14	2.04895e-14
		16.41	8.33902e-14	1.80577e-14	5.83836e-14	1.47591e-14	9.60107e-14	2.11619e-14
		16.43	8.36876e-14	1.45942e-14	5.48218e-14	1.46061e-14	9.90732e-14	2.09176e-14
		16.45	7.5864e-14	1.51516e-14	5.48357e-14	1.96747e-14	9.78154e-14	1.99775e-14
		16.47	7.65522e-14	1.59048e-14	5.59273e-14	1.84494e-14	9.87115e-14	2.04186e-14
		16.49	7.22484e-14	1.37642e-14	5.61077e-14	1.83446e-14	9.63174e-14	1.8663e-14
		16.51	7.4516e-14	1.42815e-14	5.89635e-14	1.52054e-14	9.45678e-14	1.87008e-14
		16.53	7.48025e-14	1.64219e-14	5.04255e-14	1.60606e-14	9.61565e-14	2.28436e-14
		16.55	7.26656e-14	1.33686e-14	5.42397e-14	1.83756e-14	9.44338e-14	2.21725e-14
		16.57	7.75114e-14	1.74482e-14	5.19341e-14	1.73046e-14	9.56535e-14	2.09112e-14
		16.59	7.87244e-14	1.61862e-14	5.42896e-14	1.71957e-14	9.53206e-14	1.88634e-14
		16.61	7.2126e-14	1.56042e-14	5.35277e-14	1.84417e-14	9.81615e-14	1.93369e-14
		16.63	8.47463e-14	1.76728e-14	4.91796e-14	1.42089e-14	9.92222e-14	2.04094e-14
		16.65	6.95928e-14	1.49378e-14	5.66546e-14	1.55537e-14	9.52759e-14	1.73537e-14
		16.67	7.99334e-14	1.64289e-14	5.33072e-14	1.49685e-14	9.80638e-14	1.87773e-14
		16.69	7.80855e-14	1.74839e-14	5.17988e-14	1.7842e-14	9.64249e-14	1.90755e-14
		16.71	8.01814e-14	1.61274e-14	5.778e-14	1.57606e-14	9.69953e-14	1.78669e-14
		16.73	8.04768e-14	1.64243e-14	5.19835e-14	1.71433e-14	9.81022e-14	1.81033e-14
		16.75	7.44983e-14	1.53687e-14	4.58787e-14	1.95883e-14	9.42581e-14	1.87148e-14
		16.77	8.14469e-14	1.64604e-14	5.16348e-14	1.73623e-14	9.56597e-14	1.90347e-14
		16.79	7.96958e-14	1.69842e-14	4.8746e-14	1.93901e-14	9.63056e-14	1.80207e-14
		16.81	7.40235e-14	1.5668e-14	4.9926e-14	1.70097e-14	9.04416e-14	1.91341e-14
		16.83	7.52044e-14	1.41923e-14	5.26137e-14	1.75467e-14	9.66907e-14	2.33735e-14
		16.85	7.06568e-14	1.44119e-14	5.04854e-14	1.80922e-14	9.12981e-14	1.98979e-14
		16.87	8.17054e-14	1.60158e-14	5.06776e-14	1.64121e-14	9.22234e-14	1.94546e-14
		16.89	7.30272e-14	1.49107e-14	5.28611e-14	1.81183e-14	8.98131e-14	1.83451e-14
		16.91	7.22376e-14	1.4055e-14	5.22979e-14	1.67991e-14	9.20615e-14	2.11044e-14
		16.93	7.30815e-14	1.7726e-14	5.25067e-14	1.94516e-14	9.02276e-14	1.98571e-14
		16.95	7.40756e-14	1.66425e-14	4.83193e-14	1.87357e-14	9.07485e-14	1.92265e-14
		16.97	7.10986e-14	1.51849e-14	5.42783e-14	2.0472e-14	8.68116e-14	1.82939e-14
		16.99	7.28091e-14	1.50717e-14	4.97402e-14	1.80744e-14	8.42106e-14	1.73189e-14
		17.01	7.32801e-14	1.3755e-14	5.15977e-14	2.12004e-14	8.8337e-14	1.58842e-14
		17.03	7.5366e-14	1.43931e-14	5.24036e-14	1.72578e-14	9.15312e-14	2.0011e-14
		17.05	6.82872e-14	1.58743e-14	5.39776e-14	1.8853e-14	8.7412e-14	1.97722e-14
		17.07	7.18482e-14	1.52627e-14	5.284e-14	1.84873e-14	8.79487e-14	2.12018e-14
		17.09	7.38159e-14	1.67536e-14	4.57567e-14	1.7468e-14	9.21141e-14	1.97516e-14
		17.11	7.23937e-14	1.73924e-14	5.42107e-14	1.72363e-14	8.88966e-14	1.64611e-14
		17.13	8.04181e-14	1.74772e-14	5.39789e-14	1.69179e-14	9.00647e-14	1.57524e-14
		17.15	6.43267e-14	1.57446e-14	5.00697e-14	2.01239e-14	8.47703e-14	1.59779e-14
		17.17	6.72464e-14	1.43858e-14	5.02268e-14	1.75038e-14	8.5421e-14	1.95394e-14
		17.19	7.28207e-14	1.48272e-14	5.04774e-14	1.92726e-14	8.7128e-14	1.45136e-14
		17.21	5.99382e-14	1.20571e-14	5.06001e-14	1.61349e-14	8.82569e-14	1.94337e-14
		17.23	7.20397e-14	1.43666e-14	4.64815e-14	1.76043e-14	8.49211e-14	1.76737e-14
		17.25	6.80499e-14	1.59131e-14	4.74485e-14	1.71452e-14	8.45263e-14	1.61276e-14
		17.27	6.49603e-14	1.3429e-14	4.29274e-14	1.68656e-14	8.59435e-14	1.81677e-14
		17.29	6.49367e-14	1.39174e-14	4.55627e-14	1.80752e-14	8.09035e-14	1.80237e-14
		17.31	7.02235e-14	1.2508e-14	4.50296e-14	1.80621e-14	8.64925e-14	1.6422e-14
		17.33	6.57254e-14	1.49844e-14	4.70039e-14	1.55386e-14	8.92608e-14	1.75987e-14
		17.35	6.09406e-14	1.2412e-14	4.46018e-14	1.77515e-14	8.17947e-14	1.49232e-14
		17.37	6.6331e-14	1.59715e-14	4.22275e-14	1.82198e-14	9.02304e-14	1.8543e-14
		17.39	6.37591e-14	1.25859e-14	4.82534e-14	1.82289e-14	8.39326e-14	1.75864e-14
		17.41	6.84616e-14	1.0252e-14	4.49503e-14	1.82879e-14	7.98294e-14	1.49249e-14
		17.43	6.37069e-14	1.16716e-14	4.44146e-14	1.8274e-14	8.26007e-14	1.88801e-14
		17.45	5.8102e-14	9.71388e-15	4.64054e-14	1.93462e-14	7.92005e-14	1.76747e-14
		17.47	6.74755e-14	1.39808e-14	4.53478e-14	1.81889e-14	8.05155e-14	1.59032e-14
		17.49	6.20263e-14	1.1115e-14	4.35709e-14	2.03142e-14	8.42281e-14	1.91494e-14
		17.51	7.0276e-14	1.17534e-14	5.09747e-14	1.82744e-14	8.03252e-14	1.70564e-14
		17.53	6.04762e-14	9.43011e-15	4.83601e-14	1.75508e-14	8.15041e-14	1.74558e-14
		17.55	6.64036e-14	1.27495e-14	4.59199e-14	1.80411e-14	8.43064e-14	1.82224e-14
		17.57	6.52512e-14	1.14214e-14	4.3496e-14	1.69726e-14	8.33519e-14	1.86429e-14
		17.59	6.72442e-14	1.18138e-14	4.44528e-14	1.87822e-14	7.52048e-14	1.2826e-14
		17.61	6.16305e-14	9.30734e-15	4.52203e-14	1.86934e-14	7.57308e-14	1.52489e-14
		17.63	6.90202e-14	1.42408e-14	4.66481e-14	1.88533e-14	8.11033e-14	1.8743e-14
		17.65	6.23434e-14	1.11064e-14	4.59243e-14	1.99374e-14	7.5817e-14	1.74311e-14
		17.67	5.6162e-14	9.27562e-15	4.68274e-14	1.87277e-14	7.04444e-14	1.292e-14
		17.69	6.36725e-14	1.08628e-14	4.40661e-14	2.22313e-14	7.39915e-14	1.78514e-14
		17.71	6.481e-14	9.30219e-15	4.39479e-14	1.92641e-14	7.87786e-14	1.67069e-14
		17.73	6.07022e-14	1.22415e-14	4.23427e-14	1.76045e-14	6.99954e-14	1.50535e-14
		17.75	6.21299e-14	1.0685e-14	4.26818e-14	2.09603e-14	7.00568e-14	1.39528e-14
		17.77	6.08296e-14	1.06562e-14	4.78374e-14	1.80703e-14	7.20318e-14	1.55764e-14
		17.79	6.50869e-14	1.41225e-14	4.89094e-14	2.06245e-14	7.33381e-14	1.52434e-14
		17.81	6.30473e-14	1.26874e-14	4.45263e-14	1.89952e-14	7.25675e-14	1.66157e-14
		17.83	6.3393e-14	1.39989e-14	4.51217e-14	1.91408e-14	7.16224e-14	1.77188e-14
		17.85	6.55076e-14	1.25289e-14	4.67115e-14	2.0861e-14	7.40778e-14	1.41483e-14
		17.87	6.27471e-14	9.27554e-15	4.9503e-14	1.75893e-14	7.29061e-14	1.70163e-14
		17.89	6.72796e-14	1.03363e-14	4.86208e-14	1.82517e-14	7.13228e-14	1.60489e-14
		17.91	6.29617e-14	1.23794e-14	4.54667e-14	1.85024e-14	7.05907e-14	1.41975e-14
		17.93	5.92278e-14	1.06217e-14	4.22066e-14	1.82401e-14	7.24949e-14	1.49707e-14
		17.95	6.4983e-14	1.2892e-14	4.60151e-14	2.14837e-14	7.68895e-14	1.5084e-14
		17.97	5.65853e-14	9.32216e-15	4.50608e-14	1.41909e-14	7.24788e-14	1.4068e-14
		17.99	6.24544e-14	1.08169e-14	4.44195e-14	1.77351e-14	6.99333e-14	1.59382e-14
		18.01	5.93731e-14	9.48211e-15	4.08912e-14	1.83132e-14	6.61501e-14	1.65788e-14
		18.03	5.97055e-14	1.2267e-14	4.50306e-14	1.83604e-14	7.12683e-14	1.63922e-14
		18.05	6.17648e-14	1.21568e-14	4.37958e-14	1.77891e-14	7.17913e-14	1.50686e-14
		18.07	5.96824e-14	1.10546e-14	4.60935e-14	1.97699e-14	6.27244e-14	1.56749e-14
		18.09	5.69542e-14	1.22088e-14	4.15175e-14	2.0105e-14	6.71947e-14	1.74395e-14
		18.11	5.2567e-14	8.31607e-15	4.70877e-14	1.67231e-14	7.07796e-14	1.96077e-14
		18.13	5.43086e-14	1.14381e-14	4.66404e-14	1.60779e-14	6.60632e-14	1.63042e-14
		18.15	5.43889e-14	1.20203e-14	4.52877e-14	1.67686e-14	6.70821e-14	1.66051e-14
		18.17	4.98046e-14	8.67462e-15	4.59362e-14	1.79598e-14	6.5503e-14	1.55526e-14
		18.19	5.50258e-14	1.36238e-14	4.1555e-14	1.63164e-14	6.51835e-14	1.79103e-14
		18.21	4.87312e-14	6.84393e-15	4.24493e-14	1.74583e-14	6.48982e-14	1.80603e-14
		18.23	5.18395e-14	1.08537e-14	4.58571e-14	1.56982e-14	6.64052e-14	1.90048e-14
		18.25	5.75859e-14	8.9378e-15	3.9791e-14	1.81482e-14	6.76699e-14	1.82491e-14
		18.27	5.41135e-14	1.00899e-14	4.25412e-14	1.43159e-14	6.25227e-14	1.64863e-14
		18.29	6.05959e-14	1.12338e-14	4.31022e-14	1.74002e-14	6.8142e-14	1.84709e-14
		18.31	5.81349e-14	1.12911e-14	3.68372e-14	1.94802e-14	6.4908e-14	1.50789e-14
		18.33	5.82953e-14	1.39902e-14	4.30353e-14	1.82188e-14	6.76703e-14	1.68356e-14
		18.35	5.40575e-14	1.06372e-14	3.89105e-14	1.62835e-14	5.98331e-14	1.64531e-14
		18.37	5.23163e-14	1.00586e-14	4.42489e-14	1.44617e-14	6.37593e-14	1.56257e-14
		18.39	4.70737e-14	8.37861e-15	4.3983e-14	1.66045e-14	6.48992e-14	1.53493e-14
		18.41	4.74448e-14	5.87889e-15	4.17643e-14	1.50176e-14	6.22079e-14	1.35e-14
		18.43	5.22869e-14	8.68362e-15	3.88252e-14	1.50942e-14	6.63732e-14	1.64941e-14
		18.45	5.0654e-14	8.62019e-15	3.28816e-14	1.77511e-14	6.2327e-14	1.38996e-14
		18.47	5.28911e-14	1.08234e-14	3.89194e-14	1.46971e-14	6.78498e-14	1.40418e-14
		18.49	5.2089e-14	9.4953e-15	3.96592e-14	1.72528e-14	6.5836e-14	1.56661e-14
		18.51	4.74986e-14	6.4093e-15	4.07534e-14	1.58359e-14	6.81056e-14	1.39763e-14
		18.53	5.04828e-14	9.63609e-15	4.05729e-14	1.54237e-14	6.5835e-14	1.56811e-14
		18.55	4.98932e-14	8.41207e-15	4.57934e-14	1.5542e-14	6.59194e-14	1.6534e-14
		18.57	5.45715e-14	9.0082e-15	3.82915e-14	1.56525e-14	6.28268e-14	1.34293e-14
		18.59	4.59505e-14	7.08888e-15	3.74789e-14	1.59188e-14	6.22109e-14	1.63437e-14
		18.61	4.78704e-14	1.00265e-14	4.09293e-14	1.67955e-14	6.02106e-14	1.16313e-14
		18.63	4.62183e-14	1.00777e-14	4.52348e-14	1.44706e-14	5.76988e-14	1.27501e-14
		18.65	5.21313e-14	9.70551e-15	3.5289e-14	1.76025e-14	6.15401e-14	1.43557e-14
		18.67	4.15573e-14	7.5199e-15	4.16211e-14	1.41543e-14	6.00749e-14	1.48797e-14
		18.69	4.77516e-14	8.84768e-15	3.98025e-14	1.36302e-14	5.84143e-14	1.41591e-14
		18.71	4.70801e-14	9.64721e-15	4.14434e-14	1.45263e-14	6.00161e-14	1.69877e-14
		18.73	4.73273e-14	8.56728e-15	4.09612e-14	1.59053e-14	6.18013e-14	1.80686e-14
		18.75	4.93267e-14	6.56078e-15	3.811e-14	1.50673e-14	5.86402e-14	1.46153e-14
		18.77	4.86293e-14	7.98925e-15	3.70308e-14	1.4912e-14	5.75994e-14	1.46385e-14
		18.79	4.86871e-14	1.23002e-14	3.90305e-14	1.37308e-14	5.66456e-14	1.47637e-14
		18.81	4.75722e-14	1.08587e-14	4.18662e-14	1.30364e-14	5.66077e-14	1.76208e-14
		18.83	4.73749e-14	9.91777e-15	3.87807e-14	1.35807e-14	5.76055e-14	1.45443e-14
		18.85	4.52558e-14	1.00488e-14	3.73479e-14	1.43095e-14	5.68846e-14	1.67814e-14
		18.87	5.16048e-14	8.29568e-15	3.8934e-14	1.42735e-14	5.50556e-14	1.32424e-14
		18.89	3.87725e-14	9.12077e-15	4.21445e-14	1.4814e-14	5.75344e-14	1.66835e-14
		18.91	4.27491e-14	7.00343e-15	4.16572e-14	1.33095e-14	5.29116e-14	1.39956e-14
		18.93	4.26944e-14	1.08259e-14	4.11785e-14	1.18101e-14	5.31812e-14	1.65505e-14
		18.95	4.33508e-14	9.13618e-15	4.21111e-14	1.41856e-14	5.17043e-14	1.36188e-14
		18.97	4.10859e-14	9.83021e-15	3.88646e-14	1.80403e-14	5.32392e-14	1.71169e-14
		18.99	4.33543e-14	6.303e-15	3.96332e-14	1.61104e-14	5.56634e-14	1.56486e-14
		19.01	4.78563e-14	7.56541e-15	3.63993e-14	1.57206e-14	5.1931e-14	1.61057e-14
		19.03	4.84864e-14	1.18919e-14	3.53487e-14	1.53709e-14	5.29391e-14	1.48902e-14
		19.05	4.32401e-14	7.7943e-15	3.84882e-14	1.46963e-14	5.16928e-14	1.76284e-14
		19.07	3.84184e-14	7.86755e-15	3.65951e-14	1.31825e-14	5.79097e-14	1.64719e-14
		19.09	4.48445e-14	8.62935e-15	3.50326e-14	1.45355e-14	5.03099e-14	1.47053e-14
		19.11	4.24176e-14	8.14289e-15	4.44592e-14	1.27775e-14	4.70743e-14	1.59792e-14
		19.13	3.95062e-14	8.04789e-15	4.13896e-14	1.45629e-14	5.39613e-14	1.45161e-14
		19.15	4.51492e-14	7.27833e-15	4.00689e-14	1.30553e-14	4.93903e-14	1.42263e-14
		19.17	4.2495e-14	1.16277e-14	4.24948e-14	1.43211e-14	5.07611e-14	1.49762e-14
		19.19	4.68099e-14	1.1723e-14	3.8966e-14	1.47032e-14	4.98046e-14	1.55262e-14
		19.21	4.50825e-14	9.35914e-15	3.71799e-14	1.46875e-14	5.09031e-14	1.30235e-14
		19.23	4.3578e-14	9.67324e-15	3.69868e-14	1.2831e-14	5.19284e-14	1.50377e-14
		19.25	3.79839e-14	1.21183e-14	3.63653e-14	1.27313e-14	4.9412e-14	1.42488e-14
		19.27	3.46471e-14	7.42845e-15	3.79719e-14	1.29453e-14	5.34424e-14	1.35533e-14
		19.29	4.04765e-14	8.53502e-15	3.87619e-14	1.34486e-14	4.91315e-14	1.5718e-14
		19.31	4.00927e-14	9.30867e-15	3.24177e-14	1.38718e-14	5.06451e-14	1.3601e-14
		19.33	3.34588e-14	7.1274e-15	3.82362e-14	1.5294e-14	5.56407e-14	1.23342e-14
		19.35	4.06925e-14	6.25393e-15	4.0223e-14	1.45556e-14	5.4127e-14	1.14062e-14
		19.37	4.09075e-14	7.16762e-15	3.77549e-14	1.08364e-14	5.27915e-14	1.32954e-14
		19.39	3.73633e-14	7.15513e-15	3.62596e-14	1.49158e-14	5.27848e-14	1.17949e-14
		19.41	3.7798e-14	7.25781e-15	3.60426e-14	1.51164e-14	5.61034e-14	1.23349e-14
		19.43	4.04006e-14	8.03701e-15	3.95992e-14	1.36648e-14	5.40172e-14	1.16162e-14
		19.45	3.37334e-14	9.67477e-15	3.15983e-14	1.44517e-14	5.57267e-14	1.24644e-14
		19.47	3.37624e-14	7.17212e-15	3.10988e-14	1.21837e-14	5.12412e-14	1.28036e-14
		19.49	3.79053e-14	8.54298e-15	3.13189e-14	1.61848e-14	5.11977e-14	1.27269e-14
		19.51	3.74908e-14	9.52147e-15	3.70368e-14	1.19822e-14	4.95422e-14	1.06144e-14
		19.53	3.2266e-14	4.50479e-15	3.3818e-14	1.2705e-14	5.41297e-14	1.08267e-14
		19.55	3.51805e-14	6.60714e-15	3.68044e-14	1.05016e-14	5.04188e-14	9.29881e-15
		19.57	3.13623e-14	9.10456e-15	3.79713e-14	1.25799e-14	5.02662e-14	9.81496e-15
		19.59	3.07575e-14	5.28126e-15	3.5919e-14	1.42444e-14	5.6597e-14	1.17064e-14
		19.61	3.35281e-14	3.74596e-15	3.9278e-14	1.171e-14	5.42487e-14	8.55756e-15
		19.63	3.32234e-14	7.98543e-15	3.42465e-14	1.47977e-14	5.50953e-14	8.76669e-15
		19.65	3.30964e-14	4.84412e-15	3.1761e-14	1.28346e-14	5.79808e-14	9.73809e-15
		19.67	2.84177e-14	8.186e-15	3.29615e-14	1.37471e-14	5.83556e-14	1.00918e-14
		19.69	3.40402e-14	5.94485e-15	3.54886e-14	1.23436e-14	5.88813e-14	7.80128e-15
		19.71	3.53579e-14	7.62463e-15	3.49555e-14	1.36119e-14	5.8952e-14	8.41675e-15
		19.73	3.1321e-14	7.70999e-15	3.26555e-14	1.30885e-14	5.94711e-14	8.59119e-15
		19.75	3.78005e-14	1.07421e-14	3.28476e-14	1.26509e-14	5.9448e-14	1.23122e-14
		19.77	2.97614e-14	5.84648e-15	3.64955e-14	1.33339e-14	6.54381e-14	8.88825e-15
		19.79	3.02113e-14	4.74998e-15	3.02903e-14	8.63481e-15	6.38866e-14	8.44094e-15
		19.81	3.42512e-14	6.41355e-15	3.35185e-14	1.14983e-14	6.15259e-14	1.05771e-14
		19.83	2.95623e-14	6.45669e-15	2.97536e-14	1.2506e-14	6.14992e-14	9.68421e-15
		19.85	2.98042e-14	1.01747e-14	3.46976e-14	1.09733e-14	6.06745e-14	9.24683e-15
		19.87	3.71453e-14	9.64853e-15	3.99827e-14	1.25648e-14	5.82746e-14	1.07841e-14
		19.89	3.25934e-14	1.17431e-14	4.03979e-14	1.08463e-14	6.41492e-14	7.8652e-15
		19.91	3.84106e-14	1.42383e-14	4.08324e-14	1.05904e-14	6.12691e-14	9.97683e-15
		19.93	2.79072e-14	6.51003e-15	4.1081e-14	1.48393e-14	6.13809e-14	9.15768e-15
		19.95	3.00626e-14	9.66823e-15	3.79843e-14	1.67845e-14	6.02991e-14	8.67434e-15
		19.97	2.56908e-14	6.70621e-15	4.26475e-14	1.38721e-14	6.31992e-14	8.63416e-15
		19.99	3.09212e-14	6.95278e-15	4.21459e-14	1.22994e-14	6.32645e-14	9.10014e-15
		20.01	3.16504e-14	8.54349e-15	4.36273e-14	1.33963e-14	5.93425e-14	9.62318e-15
		20.03	2.98119e-14	9.84116e-15	4.06203e-14	1.55018e-14	5.41056e-14	9.57338e-15
		20.05	3.21439e-14	7.28237e-15	3.64625e-14	1.47508e-14	5.77163e-14	1.03849e-14
		20.07	3.29326e-14	8.0516e-15	3.52688e-14	1.41091e-14	5.76244e-14	9.47094e-15
		20.09	2.97785e-14	8.63602e-15	4.17829e-14	1.19932e-14	6.00189e-14	1.04598e-14
		20.11	2.7917e-14	9.83911e-15	3.93493e-14	1.32812e-14	5.76704e-14	8.5526e-15
		20.13	3.06378e-14	8.24217e-15	3.73239e-14	1.36147e-14	6.15506e-14	1.08521e-14
		20.15	3.48311e-14	1.02038e-14	3.91076e-14	1.31638e-14	5.62997e-14	7.92223e-15
		20.17	3.48272e-14	9.68526e-15	3.65082e-14	1.38003e-14	6.07267e-14	7.16438e-15
		20.19	2.26925e-14	6.91359e-15	3.14714e-14	1.50203e-14	6.31781e-14	8.99649e-15
		20.21	3.14972e-14	1.06837e-14	3.50569e-14	1.50434e-14	5.64836e-14	1.10253e-14
		20.23	2.94469e-14	8.45677e-15	3.7852e-14	1.49707e-14	5.9705e-14	7.78476e-15
		20.25	3.16147e-14	8.09763e-15	3.37735e-14	1.48964e-14	6.07183e-14	1.05333e-14
		20.27	2.90724e-14	8.73979e-15	3.4124e-14	1.75993e-14	5.88982e-14	9.44445e-15
		20.29	2.32236e-14	9.70243e-15	3.84354e-14	1.59051e-14	5.94555e-14	1.02008e-14
		20.31	2.43573e-14	5.37749e-15	3.47002e-14	1.56065e-14	6.54844e-14	1.02179e-14
		20.33	3.39782e-14	7.88426e-15	3.43389e-14	1.55087e-14	5.93647e-14	7.12104e-15
		20.35	3.48384e-14	6.66869e-15	3.08641e-14	1.79502e-14	6.25746e-14	7.65464e-15
		20.37	2.88892e-14	5.7269e-15	3.46077e-14	1.63743e-14	6.22696e-14	8.06122e-15
		20.39	2.62705e-14	6.79262e-15	3.15848e-14	1.59163e-14	6.28677e-14	8.29414e-15
		20.41	2.95953e-14	8.62553e-15	3.62591e-14	1.29607e-14	6.10986e-14	1.03271e-14
		20.43	2.70945e-14	6.12551e-15	3.51116e-14	1.28527e-14	5.90549e-14	1.04936e-14
		20.45	2.7916e-14	1.11356e-14	3.63382e-14	1.32419e-14	5.90369e-14	8.70416e-15
		20.47	3.14847e-14	1.16314e-14	3.77476e-14	1.22744e-14	5.85995e-14	8.19757e-15
		20.49	2.48423e-14	7.83142e-15	3.91166e-14	1.39546e-14	5.87865e-14	9.0115e-15
		20.51	3.2586e-14	9.55113e-15	3.67432e-14	1.42164e-14	5.91357e-14	6.09755e-15
		20.53	2.91044e-14	6.7418e-15	3.76878e-14	1.28192e-14	5.81005e-14	8.53014e-15
		20.55	2.98795e-14	8.21394e-15	3.67473e-14	1.21936e-14	5.65004e-14	9.45871e-15
		20.57	3.24812e-14	9.83547e-15	3.65119e-14	1.26677e-14	6.11208e-14	9.72402e-15
		20.59	2.91749e-14	8.01983e-15	3.96542e-14	1.39542e-14	5.63391e-14	8.91816e-15
		20.61	2.66399e-14	7.60686e-15	3.38234e-14	1.44261e-14	5.66733e-14	9.94244e-15
		20.63	2.76578e-14	8.27902e-15	3.28214e-14	1.35279e-14	5.71136e-14	7.86337e-15
		20.65	3.16607e-14	6.48083e-15	3.28295e-14	1.14362e-14	5.67776e-14	1.01085e-14
		20.67	2.85824e-14	1.05241e-14	3.21551e-14	1.2479e-14	5.381e-14	9.0148e-15
		20.69	2.36241e-14	7.77883e-15	3.63151e-14	1.18119e-14	5.04687e-14	9.79766e-15
		20.71	2.6731e-14	1.00593e-14	3.43757e-14	1.29627e-14	5.73593e-14	1.16504e-14
		20.73	2.92152e-14	8.46206e-15	3.37301e-14	1.33799e-14	5.39082e-14	9.796e-15
		20.75	2.64008e-14	8.18051e-15	3.13679e-14	1.02613e-14	4.72084e-14	1.05993e-14
		20.77	3.22511e-14	1.05892e-14	3.37733e-14	8.74451e-15	5.09214e-14	8.64947e-15
		20.79	2.64375e-14	7.09323e-15	3.3324e-14	1.36947e-14	5.16014e-14	9.69111e-15
		20.81	2.98702e-14	9.60754e-15	3.17495e-14	1.44852e-14	4.90298e-14	1.25379e-14
		20.83	2.59656e-14	8.69446e-15	3.53131e-14	1.14452e-14	5.12193e-14	9.97992e-15
		20.85	3.18729e-14	1.13152e-14	3.27667e-14	1.27086e-14	4.79602e-14	1.05162e-14
		20.87	2.92529e-14	1.01149e-14	3.33072e-14	1.18395e-14	4.76494e-14	1.11582e-14
		20.89	2.48546e-14	8.98707e-15	3.84964e-14	1.10897e-14	4.79946e-14	9.39107e-15
		20.91	2.87067e-14	9.05109e-15	3.38916e-14	1.07528e-14	4.36789e-14	1.14777e-14
		20.93	2.99953e-14	1.16567e-14	3.08184e-14	1.13305e-14	5.14051e-14	1.21352e-14
		20.95	2.94243e-14	1.33706e-14	3.27385e-14	7.85218e-15	4.71655e-14	1.20932e-14
		20.97	3.16056e-14	1.02186e-14	3.36207e-14	1.12452e-14	4.56815e-14	1.4207e-14
		20.99	2.8995e-14	1.10935e-14	3.48568e-14	8.18094e-15	4.35888e-14	1.30776e-14
		21.01	2.7692e-14	9.48085e-15	3.06192e-14	7.93201e-15	4.55316e-14	1.30016e-14
		21.03	2.44797e-14	8.22616e-15	3.37854e-14	1.42621e-14	4.60646e-14	1.34585e-14
		21.05	2.50448e-14	1.00351e-14	3.47837e-14	1.09048e-14	4.34238e-14	1.26173e-14
		21.07	2.71169e-14	1.10108e-14	3.21196e-14	8.37258e-15	4.69216e-14	1.41722e-14
		21.09	2.8626e-14	1.31667e-14	3.02592e-14	7.86113e-15	4.12308e-14	1.2193e-14
		21.11	3.2621e-14	1.50964e-14	3.31524e-14	1.091e-14	4.54547e-14	1.40703e-14
		21.13	3.03544e-14	1.13342e-14	3.34161e-14	8.44197e-15	4.12669e-14	1.48857e-14
		21.15	3.27788e-14	1.08978e-14	3.39293e-14	1.26065e-14	3.89548e-14	1.50702e-14
		21.17	3.61377e-14	1.47134e-14	3.66744e-14	1.17874e-14	4.02348e-14	1.60881e-14
		21.19	2.22259e-14	7.43754e-15	2.99196e-14	7.3258e-15	4.1027e-14	1.59772e-14
		21.21	2.63826e-14	1.03803e-14	3.06909e-14	7.83261e-15	4.05462e-14	1.53832e-14
		21.23	3.41395e-14	1.37289e-14	3.61847e-14	9.86977e-15	4.07653e-14	1.50536e-14
		21.25	2.77608e-14	1.09847e-14	3.40328e-14	9.00966e-15	3.63422e-14	1.53448e-14
		21.27	2.93247e-14	1.25632e-14	3.48121e-14	1.10525e-14	4.2278e-14	1.68144e-14
		21.29	3.34189e-14	1.15178e-14	3.3104e-14	1.17571e-14	3.7899e-14	1.65206e-14
		21.31	2.95661e-14	1.25468e-14	3.57725e-14	8.51444e-15	4.35606e-14	1.67835e-14
		21.33	2.77144e-14	1.083e-14	2.88644e-14	8.6705e-15	3.92608e-14	1.76194e-14
		21.35	2.11002e-14	8.53367e-15	3.48012e-14	1.35736e-14	3.83709e-14	1.6739e-14
		21.37	2.92914e-14	1.31775e-14	3.37926e-14	7.18273e-15	4.04314e-14	1.94925e-14
		21.39	2.88958e-14	1.11053e-14	2.82176e-14	6.69287e-15	3.65781e-14	1.74218e-14
		21.41	2.66308e-14	8.93693e-15	2.61406e-14	9.35526e-15	3.95434e-14	1.67697e-14
		21.43	2.67559e-14	1.03621e-14	3.10539e-14	8.02903e-15	4.00994e-14	1.60805e-14
		21.45	2.62083e-14	1.06094e-14	3.40975e-14	8.82761e-15	4.17985e-14	1.52062e-14
		21.47	3.74344e-14	1.27226e-14	3.24667e-14	9.44447e-15	4.31189e-14	1.75296e-14
		21.49	2.7578e-14	1.11256e-14	2.83335e-14	8.93498e-15	4.25366e-14	1.61593e-14
		21.51	3.1695e-14	1.22206e-14	2.84807e-14	7.71567e-15	4.1682e-14	1.55092e-14
		21.53	2.95287e-14	1.053e-14	2.67402e-14	8.81159e-15	4.09177e-14	1.61784e-14
		21.55	2.22335e-14	9.96272e-15	2.5313e-14	9.39339e-15	3.84777e-14	1.48047e-14
		21.57	2.55183e-14	1.19947e-14	2.839e-14	7.17184e-15	4.07352e-14	1.56109e-14
		21.59	2.59177e-14	1.05206e-14	2.70735e-14	8.35631e-15	4.07796e-14	1.64455e-14
		21.61	2.78176e-14	8.2244e-15	2.97321e-14	5.7965e-15	4.14517e-14	1.51675e-14
		21.63	2.67753e-14	1.11599e-14	2.21047e-14	8.79506e-15	4.44788e-14	1.64716e-14
		21.65	2.53329e-14	9.64984e-15	2.71575e-14	8.26703e-15	4.03406e-14	1.53524e-14
		21.67	2.87842e-14	1.18873e-14	2.70824e-14	6.4501e-15	3.93545e-14	1.5593e-14
		21.69	2.91738e-14	1.07305e-14	2.91047e-14	9.38767e-15	3.94326e-14	1.49058e-14
		21.71	2.4956e-14	9.36897e-15	3.12933e-14	7.89872e-15	3.63325e-14	1.38749e-14
		21.73	3.02089e-14	1.22167e-14	2.74853e-14	5.71931e-15	3.60105e-14	1.48401e-14
		21.75	2.93005e-14	9.99991e-15	2.91359e-14	7.04954e-15	4.05479e-14	1.41009e-14
		21.77	2.63215e-14	1.10098e-14	2.91332e-14	6.18354e-15	3.70187e-14	1.5064e-14
		21.79	3.52858e-14	1.09799e-14	2.74131e-14	7.4869e-15	4.1753e-14	1.34879e-14
		21.81	2.81099e-14	1.13314e-14	2.7656e-14	5.09641e-15	3.52695e-14	1.42703e-14
		21.83	3.22866e-14	1.1691e-14	2.53567e-14	6.22522e-15	3.98007e-14	1.48334e-14
		21.85	2.527e-14	1.05128e-14	2.78585e-14	7.66314e-15	3.63258e-14	1.38208e-14
		21.87	2.53336e-14	9.37668e-15	2.62103e-14	7.2526e-15	4.17334e-14	1.61351e-14
		21.89	3.219e-14	1.51086e-14	2.87322e-14	5.89906e-15	3.7969e-14	1.48137e-14
		21.91	2.87461e-14	1.04423e-14	2.50788e-14	6.74066e-15	4.38895e-14	1.40361e-14
		21.93	2.90436e-14	7.75822e-15	1.96977e-14	7.74812e-15	4.26012e-14	1.28065e-14
		21.95	3.20304e-14	1.15558e-14	2.44883e-14	7.58233e-15	3.58885e-14	1.52757e-14
		21.97	3.01756e-14	1.25844e-14	2.62766e-14	5.94927e-15	3.77733e-14	1.42291e-14
		21.99	3.10361e-14	1.10807e-14	2.87132e-14	9.42891e-15	4.03386e-14	1.49172e-14
		22.01	3.1191e-14	9.62451e-15	2.84371e-14	9.64915e-15	3.92745e-14	1.35641e-14
		22.03	3.13847e-14	1.20846e-14	2.34595e-14	8.50593e-15	4.33735e-14	1.42702e-14
		22.05	2.71178e-14	1.03306e-14	2.63328e-14	8.5203e-15	4.30893e-14	1.3819e-14
		22.07	3.10097e-14	8.99211e-15	2.31017e-14	8.26593e-15	4.26962e-14	1.40218e-14
		22.09	2.49598e-14	8.89797e-15	2.70012e-14	4.53085e-15	4.0153e-14	1.57256e-14
		22.11	2.59342e-14	9.39282e-15	2.26762e-14	4.72374e-15	3.80264e-14	1.33884e-14
		22.13	2.98412e-14	8.22551e-15	2.73069e-14	7.99617e-15	3.90887e-14	1.50606e-14
		22.15	2.32463e-14	9.94322e-15	2.35194e-14	7.62909e-15	4.07803e-14	1.46138e-14
		22.17	2.64205e-14	9.16697e-15	2.39586e-14	7.08571e-15	4.01798e-14	1.39912e-14
		22.19	3.27581e-14	1.17623e-14	2.36549e-14	6.88763e-15	4.26374e-14	1.50138e-14
		22.21	2.48657e-14	9.52669e-15	2.55604e-14	8.49528e-15	4.01706e-14	1.41625e-14
		22.23	2.50291e-14	1.14473e-14	2.13465e-14	6.83847e-15	4.31821e-14	1.26769e-14
		22.25	2.2793e-14	9.99693e-15	2.07705e-14	8.64251e-15	3.95391e-14	1.42658e-14
		22.27	2.21377e-14	1.02263e-14	2.42199e-14	5.31374e-15	4.12731e-14	1.48887e-14
		22.29	2.42747e-14	1.07107e-14	1.96584e-14	9.04187e-15	4.44142e-14	1.66413e-14
		22.31	1.40422e-14	7.10961e-15	2.71832e-14	8.97336e-15	4.4475e-14	1.72516e-14
		22.33	2.44498e-14	8.32167e-15	2.64669e-14	6.12439e-15	4.81327e-14	1.56781e-14
		22.35	2.5706e-14	9.8528e-15	2.09042e-14	7.8338e-15	4.31491e-14	1.84669e-14
		22.37	2.38467e-14	9.35868e-15	2.20957e-14	8.06578e-15	4.42669e-14	1.75061e-14
		22.39	2.21964e-14	5.85046e-15	2.93103e-14	1.0333e-14	4.60687e-14	1.91016e-14
		22.41	2.75955e-14	9.65629e-15	2.9019e-14	9.11331e-15	4.46921e-14	1.65612e-14
		22.43	2.33127e-14	8.18062e-15	2.18534e-14	9.85636e-15	4.67138e-14	1.88578e-14
		22.45	2.79142e-14	1.43038e-14	2.64856e-14	8.07563e-15	4.82763e-14	1.69831e-14
		22.47	2.00513e-14	7.29581e-15	2.72668e-14	9.46308e-15	4.44723e-14	1.70398e-14
		22.49	1.97943e-14	1.10915e-14	2.22781e-14	4.26447e-15	4.0896e-14	1.70049e-14
		22.51	2.28584e-14	9.30498e-15	2.53492e-14	7.26673e-15	4.30303e-14	1.66101e-14
		22.53	2.60736e-14	9.59611e-15	2.27074e-14	6.92233e-15	4.61925e-14	1.73956e-14
		22.55	1.66034e-14	9.33103e-15	2.49073e-14	7.22013e-15	3.95598e-14	1.68388e-14
		22.57	1.97308e-14	7.71527e-15	2.18967e-14	4.21011e-15	4.18739e-14	1.72085e-14
		22.59	2.24574e-14	9.74573e-15	2.66456e-14	4.57006e-15	4.24768e-14	1.81297e-14
		22.61	2.04344e-14	1.37397e-14	2.49276e-14	7.75213e-15	4.0799e-14	1.56971e-14
		22.63	1.89207e-14	1.11674e-14	2.02659e-14	5.82882e-15	4.40336e-14	1.84431e-14
		22.65	1.6262e-14	7.46343e-15	2.33322e-14	5.30027e-15	3.87292e-14	1.65625e-14
		22.67	1.68273e-14	9.35501e-15	2.00647e-14	6.93948e-15	4.35905e-14	1.67429e-14
		22.69	2.04387e-14	1.00819e-14	2.3215e-14	8.95721e-15	4.21879e-14	1.6249e-14
		22.71	1.61519e-14	9.01506e-15	2.12227e-14	5.93795e-15	3.88711e-14	1.81191e-14
		22.73	2.35076e-14	1.23569e-14	2.47123e-14	7.37059e-15	3.88111e-14	1.91588e-14
		22.75	1.91686e-14	8.98149e-15	2.40584e-14	8.14846e-15	4.18536e-14	1.82623e-14
		22.77	2.03239e-14	1.07868e-14	2.19568e-14	6.17026e-15	4.30881e-14	1.67567e-14
		22.79	1.94347e-14	1.14808e-14	2.27377e-14	4.87781e-15	4.14248e-14	1.62206e-14
		22.81	1.92038e-14	9.91042e-15	2.32902e-14	5.62275e-15	4.49729e-14	1.56495e-14
		22.83	2.32576e-14	1.02557e-14	2.23147e-14	6.39906e-15	4.26571e-14	1.88802e-14
		22.85	1.91269e-14	9.65923e-15	2.68001e-14	1.11218e-14	4.29224e-14	1.69108e-14
		22.87	1.89937e-14	1.36639e-14	1.95618e-14	9.28251e-15	4.45945e-14	1.55321e-14
		22.89	2.50392e-14	1.20812e-14	1.74034e-14	9.25573e-15	4.23243e-14	1.55487e-14
		22.91	2.39544e-14	1.30392e-14	2.23456e-14	7.85089e-15	4.34453e-14	1.6607e-14
		22.93	1.75504e-14	8.2596e-15	2.60626e-14	9.16649e-15	4.12803e-14	1.70476e-14
		22.95	1.48554e-14	9.28492e-15	1.84465e-14	9.31008e-15	4.15517e-14	1.78953e-14
		22.97	1.93793e-14	9.18497e-15	2.10917e-14	8.11885e-15	4.06993e-14	1.73673e-14
		22.99	1.99862e-14	9.35469e-15	1.87577e-14	8.6205e-15	4.32493e-14	1.89231e-14
		23.01	2.15996e-14	9.9852e-15	1.85201e-14	6.18436e-15	4.46044e-14	1.67709e-14
		23.03	1.58836e-14	1.03573e-14	1.88064e-14	6.82138e-15	4.15682e-14	1.95384e-14
		23.05	2.32192e-14	1.37539e-14	1.58504e-14	5.6054e-15	4.58195e-14	1.88639e-14
		23.07	1.60274e-14	1.27932e-14	1.67449e-14	6.35569e-15	4.22913e-14	1.84984e-14
		23.09	2.50242e-14	1.21284e-14	1.69254e-14	6.36398e-15	4.56451e-14	2.04498e-14
		23.11	1.37712e-14	8.47424e-15	1.86972e-14	8.27861e-15	4.22065e-14	2.09257e-14
		23.13	2.04968e-14	1.00483e-14	1.70758e-14	6.43556e-15	4.4858e-14	1.90678e-14
		23.15	1.173e-14	7.83995e-15	1.99456e-14	6.36539e-15	4.4034e-14	2.01858e-14
		23.17	1.54356e-14	7.49743e-15	1.41128e-14	4.20564e-15	4.00444e-14	1.94368e-14
		23.19	1.65394e-14	8.65203e-15	1.66525e-14	8.21251e-15	4.17138e-14	1.7892e-14
		23.21	1.35155e-14	1.05684e-14	1.85457e-14	5.21253e-15	4.76049e-14	1.84653e-14
		23.23	1.81289e-14	9.94288e-15	1.82526e-14	4.75208e-15	4.83297e-14	1.94664e-14
		23.25	1.46687e-14	7.53641e-15	1.59682e-14	6.09553e-15	4.21837e-14	1.79431e-14
		23.27	1.73934e-14	8.99813e-15	1.51665e-14	5.34594e-15	4.82087e-14	1.74206e-14
		23.29	1.47946e-14	9.40697e-15	1.53964e-14	5.23272e-15	4.49537e-14	1.81628e-14
		23.31	1.36174e-14	9.32202e-15	1.13542e-14	5.1313e-15	4.04381e-14	1.7826e-14
		23.33	1.15548e-14	8.61743e-15	2.15842e-14	7.72486e-15	4.43179e-14	1.8975e-14
		23.35	1.73528e-14	8.32448e-15	2.23077e-14	5.31784e-15	4.17532e-14	1.81072e-14
		23.37	1.48126e-14	9.05407e-15	1.84142e-14	5.99338e-15	4.17023e-14	1.80045e-14
		23.39	9.23315e-15	8.75409e-15	1.82112e-14	3.95841e-15	4.41658e-14	1.97166e-14
		23.41	7.76391e-15	7.39531e-15	1.42109e-14	4.57e-15	3.80638e-14	1.68381e-14
		23.43	1.42006e-14	8.94797e-15	1.20595e-14	6.30738e-15	4.06662e-14	1.78168e-14
		23.45	1.21895e-14	9.41156e-15	1.72633e-14	4.59833e-15	4.13276e-14	1.75477e-14
		23.47	1.03212e-14	1.02617e-14	1.65162e-14	4.86114e-15	4.24345e-14	1.99851e-14
		23.49	5.85964e-15	6.97101e-15	2.14081e-14	6.4356e-15	4.09454e-14	1.90764e-14
		23.51	1.18967e-14	8.63813e-15	2.37226e-14	6.8594e-15	4.2929e-14	1.78384e-14
		23.53	7.35727e-15	8.03848e-15	2.04508e-14	5.57904e-15	4.0449e-14	1.99271e-14
		23.55	6.52278e-15	5.19206e-15	1.51776e-14	2.87592e-15	4.2718e-14	1.82613e-14
		23.57	4.28008e-15	6.21943e-15	1.58565e-14	7.87595e-15	3.73776e-14	1.96923e-14
		23.59	1.09053e-14	7.38231e-15	1.98455e-14	6.89088e-15	4.5473e-14	1.91494e-14
		23.61	7.10626e-15	4.94461e-15	1.61905e-14	4.54576e-15	4.13261e-14	1.92692e-14
		23.63	1.52118e-14	7.69944e-15	2.12418e-14	9.12467e-15	4.14955e-14	1.88819e-14
		23.65	1.42392e-14	8.20813e-15	1.66781e-14	5.49373e-15	4.1149e-14	1.9802e-14
		23.67	3.87543e-15	5.47584e-15	1.68524e-14	6.13591e-15	4.42122e-14	2.05622e-14
		23.69	1.16238e-14	7.75311e-15	1.02453e-14	7.36899e-15	4.58375e-14	1.84248e-14
		23.71	8.38288e-15	6.82132e-15	1.33708e-14	2.90696e-15	4.58487e-14	2.68116e-14
		23.73	1.25515e-14	9.65321e-15	1.40475e-14	6.2749e-15	4.28606e-14	2.05919e-14
		23.75	1.4001e-14	8.07491e-15	1.692e-14	6.05529e-15	3.99731e-14	2.10639e-14
		23.77	9.98331e-15	9.58724e-15	1.28033e-14	2.96102e-15	4.09172e-14	1.9346e-14
		23.79	1.20332e-14	5.31806e-15	1.13533e-14	3.42405e-15	4.01862e-14	2.02073e-14
		23.81	1.21444e-14	8.91151e-15	9.91837e-15	4.68824e-15	4.60665e-14	2.03497e-14
		23.83	9.405e-15	6.65883e-15	1.26299e-14	5.39542e-15	4.33644e-14	2.01532e-14
		23.85	5.40872e-15	2.91209e-15	1.07786e-14	6.24111e-15	4.43069e-14	2.06006e-14
		23.87	1.28723e-14	6.96339e-15	1.04911e-14	6.29405e-15	3.82358e-14	1.8487e-14
		23.89	8.31033e-15	7.75684e-15	1.449e-14	8.03534e-15	4.19487e-14	1.94195e-14
		23.91	1.63488e-14	7.54447e-15	1.35162e-14	6.63497e-15	4.31491e-14	2.04401e-14
		23.93	1.0208e-14	5.28595e-15	1.31522e-14	3.08443e-15	3.71155e-14	1.99792e-14
		23.95	9.71111e-15	8.12177e-15	1.05857e-14	4.6685e-15	3.65349e-14	1.97543e-14
		23.97	1.67223e-14	1.00467e-14	1.16525e-14	2.70062e-15	3.92246e-14	1.95783e-14
		23.99	1.4884e-14	6.10987e-15	8.20824e-15	4.87907e-15	3.65653e-14	1.99534e-14
		24.01	1.66171e-14	7.05043e-15	1.31875e-14	6.54983e-15	3.60911e-14	2.0413e-14
		24.03	1.54293e-14	1.34117e-14	1.39078e-14	4.93721e-15	3.79768e-14	2.15322e-14
		24.05	1.34643e-14	7.84766e-15	1.27673e-14	3.72557e-15	3.63888e-14	2.01204e-14
		24.07	1.48499e-14	6.0549e-15	8.61502e-15	4.88774e-15	4.12919e-14	2.03675e-14
		24.09	8.81024e-15	5.05395e-15	8.57842e-15	6.07201e-15	4.07136e-14	2.56986e-14
		24.11	1.13053e-14	7.56089e-15	1.04069e-14	5.74942e-15	3.48679e-14	2.05027e-14
		24.13	1.49001e-14	9.35338e-15	1.34385e-14	3.71816e-15	3.88771e-14	1.88972e-14
		24.15	1.32967e-14	1.19084e-14	1.50448e-14	7.64046e-15	3.83534e-14	2.0111e-14
		24.17	9.65217e-15	6.89679e-15	6.9883e-15	3.56345e-15	4.2255e-14	2.12162e-14
		24.19	1.67424e-14	5.82127e-15	1.05119e-14	6.03398e-15	4.01235e-14	1.88507e-14
		24.21	7.51792e-15	8.94587e-15	1.35727e-14	5.42545e-15	3.704e-14	1.86019e-14
		24.23	1.06599e-14	7.10264e-15	5.5059e-15	5.42117e-15	3.30825e-14	2.02401e-14
		24.25	4.22283e-15	6.7379e-15	1.04851e-14	3.63124e-15	3.95294e-14	2.03101e-14
		24.27	1.27522e-14	9.79686e-15	7.31075e-15	2.30759e-15	3.56464e-14	1.9725e-14
		24.29	2.62387e-15	8.68659e-15	9.12346e-15	3.99601e-15	3.68569e-14	2.11683e-14
		24.31	1.15321e-14	8.85638e-15	1.26836e-14	3.22741e-15	3.77066e-14	2.12564e-14
		24.33	9.36481e-15	6.63465e-15	1.08623e-14	4.19703e-15	3.46101e-14	1.91657e-14
		24.35	7.73799e-15	1.14807e-14	1.24158e-14	5.42468e-15	3.41228e-14	2.00983e-14
		24.37	1.3274e-14	8.88734e-15	3.0714e-15	2.61651e-15	3.60137e-14	2.04541e-14
		24.39	1.09939e-14	7.49531e-15	8.32192e-15	3.41397e-15	3.3188e-14	2.02912e-14
		24.41	1.26511e-14	6.85502e-15	9.53161e-15	4.05255e-15	3.59332e-14	2.13776e-14
		24.43	1.36821e-14	1.33598e-14	1.24527e-14	4.82652e-15	3.25627e-14	2.11699e-14
		24.45	1.49839e-14	1.16309e-14	1.01098e-14	4.58573e-15	3.43948e-14	2.10757e-14
		24.47	1.49983e-14	7.80656e-15	7.65294e-15	6.97853e-15	3.38875e-14	2.06424e-14
		24.49	8.61613e-15	8.94057e-15	1.20509e-14	6.99861e-15	3.1221e-14	2.13171e-14
		24.51	1.44006e-14	1.10862e-14	1.45754e-14	5.69957e-15	3.31575e-14	2.19504e-14
		24.53	2.86254e-15	1.07105e-14	7.44213e-15	3.40668e-15	3.30549e-14	2.10547e-14
		24.55	1.28004e-14	1.22216e-14	8.1243e-15	5.36405e-15	3.32807e-14	2.19201e-14
		24.57	5.57669e-15	9.92945e-15	4.8577e-15	1.73011e-15	3.40302e-14	1.9978e-14
		24.59	8.51381e-15	8.70111e-15	1.11035e-14	7.92546e-15	3.27963e-14	2.17928e-14
		24.61	1.44493e-14	8.8369e-15	7.59083e-15	5.27668e-15	3.31659e-14	2.14678e-14
		24.63	1.58726e-14	1.35122e-14	8.46163e-15	4.30495e-15	3.1569e-14	2.02936e-14
		24.65	1.12237e-14	8.78227e-15	1.02503e-14	6.32885e-15	3.51843e-14	2.29141e-14
		24.67	1.2047e-14	9.67717e-15	1.19684e-14	3.79901e-15	3.22164e-14	2.25396e-14
		24.69	8.36229e-15	8.51107e-15	1.20209e-14	4.73423e-15	3.6442e-14	2.12811e-14
		24.71	8.90531e-15	1.03648e-14	5.92324e-15	6.46351e-15	3.47653e-14	2.1262e-14
		24.73	7.01782e-15	9.74172e-15	1.30522e-14	5.4412e-15	3.33759e-14	2.22685e-14
		24.75	4.19439e-15	8.9402e-15	1.04831e-14	5.99087e-15	3.58972e-14	2.10283e-14
		24.77	6.25629e-15	9.32234e-15	7.99162e-15	3.59438e-15	3.25974e-14	2.3441e-14
		24.79	3.90365e-15	1.06907e-14	5.28298e-15	3.00736e-15	3.66369e-14	2.231e-14
		24.81	6.59754e-15	1.06754e-14	8.49751e-15	6.98213e-15	3.72769e-14	2.28517e-14
		24.83	5.68893e-15	7.73523e-15	5.92014e-15	5.60984e-15	3.53816e-14	2.48369e-14
		24.85	-6.74407e-16	8.35273e-15	9.90118e-15	7.72385e-15	3.47439e-14	2.35185e-14
		24.87	8.51628e-15	9.61186e-15	1.3782e-14	6.4223e-15	3.25123e-14	2.30302e-14
		24.89	1.07084e-14	1.03963e-14	5.30481e-15	7.62424e-15	3.36356e-14	2.3682e-14
		24.91	-1.28784e-17	9.49411e-15	4.69118e-15	6.45514e-15	3.45939e-14	2.27498e-14
		24.93	5.25613e-15	9.8472e-15	8.8814e-15	6.05199e-15	3.18914e-14	2.20106e-14
		24.95	8.08763e-15	1.20033e-14	7.27148e-15	5.50871e-15	3.75875e-14	2.24093e-14
		24.97	4.33556e-15	1.27318e-14	5.2946e-15	3.67571e-15	3.52316e-14	2.30777e-14
		24.99	4.86206e-15	1.39403e-14	2.98406e-15	5.97436e-15	3.80061e-14	2.4197e-14
		25.01	4.7899e-15	1.03582e-14	9.33108e-15	6.83619e-15	3.63411e-14	2.41814e-14
		25.03	5.67445e-15	1.58844e-14	2.67602e-15	5.26122e-15	3.30086e-14	2.12411e-14
		25.05	6.33809e-15	9.2501e-15	9.41061e-15	5.58453e-15	2.91344e-14	2.15906e-14
		25.07	4.36454e-15	5.03331e-15	6.60985e-15	3.46541e-15	3.32445e-14	2.20309e-14
		25.09	1.11596e-14	1.09101e-14	1.32727e-14	6.4704e-15	3.19853e-14	2.20216e-14
		25.11	5.17407e-15	1.25278e-14	8.03118e-15	6.26246e-15	2.99855e-14	2.09856e-14
		25.13	1.56405e-15	1.04692e-14	4.73586e-15	5.01828e-15	3.15739e-14	2.2613e-14
		25.15	4.60647e-15	1.00579e-14	7.02627e-15	6.42957e-15	3.08742e-14	2.3893e-14
		25.17	3.95e-15	1.06647e-14	4.53177e-15	6.41113e-15	3.01246e-14	2.35243e-14
		25.19	6.58138e-15	1.11663e-14	5.22543e-15	6.5388e-15	3.42428e-14	2.27633e-14
		25.21	1.07893e-15	6.65893e-15	5.90965e-15	4.58337e-15	3.33067e-14	2.21075e-14
		25.23	6.87227e-15	1.18955e-14	8.43048e-15	5.39373e-15	3.2958e-14	2.37329e-14
		25.25	4.68271e-15	1.16055e-14	4.31786e-15	6.23843e-15	3.1868e-14	2.12681e-14
		25.27	8.37741e-15	1.15765e-14	6.95906e-15	5.596e-15	3.15967e-14	2.17181e-14
		25.29	5.32715e-15	1.2371e-14	1.32905e-14	6.33095e-15	3.25109e-14	2.22658e-14
		25.31	4.44613e-15	8.67108e-15	7.70729e-15	6.86816e-15	3.23481e-14	2.29879e-14
		25.33	5.18052e-15	1.16443e-14	7.2193e-15	5.38067e-15	2.8722e-14	2.2898e-14
		25.35	2.94097e-15	1.22699e-14	1.52895e-15	8.29071e-15	3.40909e-14	2.28937e-14
		25.37	3.12469e-15	7.46996e-15	5.29586e-17	1.06051e-14	2.95348e-14	2.20473e-14
		25.39	1.33275e-15	1.0888e-14	5.55626e-15	6.54056e-15	2.87843e-14	2.21039e-14
		25.41	5.36294e-15	6.43268e-15	4.16279e-15	6.63367e-15	2.98061e-14	2.18721e-14

## Sheet: 20 ms x 15_1 Hz
		Figure 3B_Cm traces									Figure 3B_endo rate vs stimulation									Figure 3B_1Hz_endo Rate (#12-15)_bar graph data
		Time (S)	Control		ML141		Latrunculin-B				Stimulation (#)	Control		ML141		Latrunculin-B					Control	ML141	Latrunculin-B
			Mean	SEM	Mean	SEM	Mean	SEM				Mean	SEM	Mean	SEM	Mean	SEM			Average	2.51e-13	2.14e-13	2.33e-13
																				SEM	2.83e-14	1.91e-14	4.76e-14
		0.01	-1.44127e-14	1.58993e-14	4.42821e-15	1.1929e-14	7.49614e-15	1.23806e-14			1	3.34028e-14	1.3084e-14	1.9019e-14	1.2607e-14	7.35278e-14	4.73084e-14			p-value		0.3	0.7
		0.03	-1.55127e-14	1.49361e-14	1.47821e-14	1.68002e-14	4.74645e-15	6.81707e-15			2	8.80248e-14	3.02164e-14	5.35394e-14	7.90021e-15	1.0584e-13	4.56842e-14			n-number	6	5	4
		0.05	-1.65276e-14	1.42985e-14	3.52749e-15	1.28931e-14	-7.82332e-15	6.98199e-15			3	1.22724e-13	2.68595e-14	1.21665e-13	2.75339e-14	1.31577e-13	5.27154e-14
		0.07	-1.31875e-14	1.53443e-14	1.12821e-14	1.28103e-14	5.94212e-16	7.20032e-15			4	1.383e-13	2.16084e-14	1.19946e-13	1.72148e-14	1.87338e-13	5.41618e-14
		0.09	-1.63597e-14	1.51564e-14	8.02579e-15	1.02754e-14	1.16307e-15	8.41673e-15			5	1.71628e-13	2.8921e-14	1.6305e-13	2.33387e-14	1.94949e-13	4.74515e-14
		0.11	-1.45127e-14	1.32527e-14	2.79878e-15	9.22477e-15	-3.51191e-16	8.81134e-15			6	1.68912e-13	3.04438e-14	1.65568e-13	3.00631e-14	2.1821e-13	5.23358e-14
		0.13	-1.43899e-14	1.59801e-14	6.11119e-15	8.34742e-15	-1.4685e-15	6.32783e-15			7	2.06175e-13	2.40631e-14	1.63537e-13	1.69719e-14	2.12754e-13	5.27136e-14
		0.15	-1.1436e-14	1.71419e-14	3.05114e-15	9.38351e-15	1.25769e-15	9.65081e-15			8	2.17521e-13	2.41548e-14	1.86974e-13	1.8189e-14	2.24696e-13	5.29906e-14
		0.17	-1.64151e-14	1.47417e-14	7.9828e-15	1.07174e-14	4.62615e-15	8.76782e-15			9	2.15813e-13	2.87829e-14	1.75388e-13	2.24251e-14	2.39069e-13	5.33086e-14
		0.19	-1.49016e-14	1.45414e-14	1.34312e-14	1.13644e-14	5.49452e-15	1.16884e-14			10	2.4076e-13	2.35934e-14	1.6416e-13	2.32643e-14	2.37735e-13	5.50336e-14
		0.21	-1.19354e-14	1.53621e-14	9.95548e-15	1.05744e-14	-6.21763e-17	9.08771e-15			11	2.33253e-13	3.57457e-14	2.0407e-13	1.93429e-14	2.13417e-13	4.63804e-14
		0.23	-1.69056e-14	1.43259e-14	2.33732e-15	5.42206e-15	-3.8544e-15	9.60566e-15			12	2.58891e-13	2.5963e-14	2.38361e-13	3.36686e-14	2.46542e-13	5.8197e-14
		0.25	-1.98588e-14	1.31853e-14	1.47119e-14	9.07826e-15	-1.17585e-15	7.99549e-15			13	2.48155e-13	2.99232e-14	1.93974e-13	2.3123e-14	2.30351e-13	4.69119e-14
		0.27	-1.35975e-14	1.58067e-14	8.49918e-15	1.25782e-14	-2.78514e-16	7.07757e-15			14	2.61051e-13	3.76162e-14	2.03293e-13	1.45439e-14	2.25255e-13	4.16452e-14
		0.29	-1.27182e-14	1.51204e-14	2.89321e-15	4.86115e-15	-4.42558e-15	5.74393e-15			15	2.64782e-13	2.70374e-14	2.21784e-13	2.51247e-14	2.29005e-13	4.57207e-14
		0.31	-1.6472e-14	1.30956e-14	1.01228e-14	7.89151e-15	-3.97392e-17	5.62744e-15
		0.33	-1.77131e-14	1.41081e-14	8.53443e-15	6.83597e-15	-7.55533e-15	5.9681e-15
		0.35	-1.70576e-14	1.41642e-14	1.13717e-14	7.77517e-15	-7.3662e-15	6.06144e-15
		0.37	-1.79687e-14	1.19531e-14	1.13013e-14	6.14221e-15	-3.62392e-15	7.48936e-15
		0.39	-2.05763e-14	1.2035e-14	1.41503e-14	7.9581e-15	-5.03699e-15	5.62319e-15
		0.41	-2.06466e-14	1.30062e-14	1.53816e-14	6.9578e-15	-2.49285e-16	7.46429e-15
		0.43	-1.41578e-14	1.41547e-14	7.02146e-15	6.77003e-15	8.0504e-16	5.35732e-15
		0.45	-1.1752e-14	1.42271e-14	2.97812e-15	8.15438e-15	2.94769e-15	6.99593e-15
		0.47	-1.2507e-14	1.19725e-14	5.85646e-15	5.52596e-15	1.11753e-14	1.15196e-14
		0.49	-9.0243e-15	1.43105e-14	1.19262e-14	5.09241e-15	-2.29348e-15	6.30219e-15
		0.51	-1.2983e-14	1.41754e-14	7.86779e-15	4.58322e-15	-2.40252e-15	4.75962e-15
		0.53	-1.54344e-14	1.23562e-14	4.44461e-15	5.12103e-15	6.21429e-16	4.04671e-15
		0.55	-1.54457e-14	1.29667e-14	1.167e-14	4.76722e-15	-5.07529e-15	5.38504e-15
		0.57	-9.66858e-15	1.40661e-14	6.87564e-15	5.27843e-15	3.31054e-15	5.84608e-15
		0.59	-1.51772e-14	1.08665e-14	5.73219e-15	3.15739e-15	5.21061e-16	4.74626e-15
		0.61	-7.60162e-15	1.49421e-14	1.06319e-14	8.21897e-15	-5.36306e-15	4.39424e-15
		0.63	-5.57424e-15	1.37986e-14	1.39024e-14	4.54433e-15	3.88126e-15	6.95975e-15
		0.65	-1.26142e-14	1.20609e-14	-5.43134e-16	3.19204e-15	-1.62913e-15	3.40019e-15
		0.67	-1.42223e-14	1.3089e-14	1.23508e-14	6.11153e-15	-2.41406e-15	4.9267e-15
		0.69	-1.17636e-14	1.26614e-14	1.0875e-14	3.31139e-15	-1.18055e-15	2.83433e-15
		0.71	-1.5615e-15	1.84619e-14	1.02025e-14	4.77788e-15	-7.02474e-15	3.3958e-15
		0.73	-4.88906e-15	1.32084e-14	6.94767e-15	4.12633e-15	4.52639e-16	4.17951e-15
		0.75	-1.27709e-14	1.33337e-14	8.40217e-15	4.03417e-15	-4.96333e-15	5.9734e-15
		0.77	-1.01707e-14	1.29157e-14	1.25735e-14	4.24264e-15	-5.32608e-15	6.38405e-15
		0.79	-1.14177e-14	1.12352e-14	6.34582e-15	7.57075e-15	-1.08816e-15	3.93415e-15
		0.81	-1.42474e-14	1.03655e-14	7.64858e-15	5.13401e-15	4.19118e-15	3.569e-15
		0.83	-1.27247e-14	1.32327e-14	7.11972e-15	2.83611e-15	3.07079e-15	2.92263e-15
		0.85	-1.41352e-14	1.00253e-14	5.25216e-15	8.12672e-15	-9.23099e-16	2.28432e-15
		0.87	-1.08435e-14	1.07656e-14	7.49656e-15	4.45934e-15	2.36067e-15	2.46734e-15
		0.89	-4.67629e-15	1.56911e-14	4.136e-15	7.04882e-15	5.89306e-15	2.80579e-15
		0.91	-6.94982e-15	1.37802e-14	5.88425e-15	5.57838e-15	4.08061e-15	3.68116e-15
		0.93	-1.4256e-14	1.10227e-14	1.13482e-14	7.63292e-15	1.5006e-15	3.3304e-15
		0.95	-1.70578e-14	1.23442e-14	3.65094e-15	2.12861e-15	4.5536e-15	4.74336e-15
		0.97	-1.52953e-14	9.81988e-15	2.55686e-15	4.6804e-15	-6.95418e-16	5.11687e-15
		0.99	-8.14137e-15	1.35341e-14	-4.92672e-15	5.81677e-15	-9.97852e-16	4.26603e-15
		1.01	-1.01079e-14	1.13271e-14	5.20429e-16	6.03189e-15	-2.78234e-15	3.92897e-15
		1.03	-6.82786e-15	1.13507e-14	-3.86498e-16	4.58589e-15	-7.38747e-15	4.59558e-15
		1.05	-1.06006e-14	1.14322e-14	3.41228e-15	5.55212e-15	-3.32269e-15	4.7584e-15
		1.07	-1.00714e-14	1.35268e-14	-1.41874e-15	3.63706e-15	-6.60108e-15	4.77049e-15
		1.09	-1.20139e-14	1.08951e-14	2.11607e-16	3.27985e-15	-2.71717e-15	3.1671e-15
		1.11	-6.58366e-15	1.23395e-14	3.09889e-15	3.63652e-15	-2.0894e-15	2.74392e-15
		1.13	-1.42607e-14	1.08895e-14	6.71285e-15	3.53547e-15	-1.68643e-15	4.05234e-15
		1.15	-1.51354e-14	1.00525e-14	9.21451e-15	4.24329e-15	-9.22413e-15	8.35352e-15
		1.17	-1.18484e-14	1.18586e-14	1.15712e-14	4.69902e-15	-7.53667e-15	4.87523e-15
		1.19	-1.70159e-14	1.20902e-14	2.59357e-15	4.06556e-15	-9.10268e-16	9.80387e-16
		1.21	-9.87373e-15	1.20232e-14	1.92797e-16	5.07785e-15	-6.05972e-15	4.19342e-15
		1.23	-1.07029e-14	1.04589e-14	4.49145e-15	5.64539e-15	-2.17471e-15	5.34015e-15
		1.25	-9.83329e-15	1.11405e-14	4.91078e-15	3.58005e-15	-4.33882e-15	7.45336e-15
		1.27	-7.60068e-15	1.13944e-14	1.1691e-15	2.94468e-15	-2.06904e-15	1.86964e-15
		1.29	-1.31047e-14	1.01471e-14	5.75198e-15	4.04696e-15	-6.1913e-15	3.00477e-15
		1.31	-1.18797e-14	1.05127e-14	5.693e-15	4.06946e-15	-5.54415e-15	2.34437e-15
		1.33	-8.04234e-15	1.2374e-14	1.44314e-15	5.10126e-15	-2.5366e-15	3.3418e-15
		1.35	-1.20999e-14	1.02585e-14	-5.15682e-16	3.80011e-15	9.55978e-16	2.37565e-15
		1.37	-1.45658e-14	9.97368e-15	-1.66576e-15	4.04163e-15	-3.34291e-15	3.23702e-15
		1.39	-1.21276e-14	9.6273e-15	3.60788e-16	1.80168e-15	-3.39629e-15	8.70788e-16
		1.41	-9.07244e-15	1.41896e-14	2.97899e-15	2.95152e-15	-4.1111e-15	3.13211e-15
		1.43	-1.19186e-14	1.17042e-14	2.78802e-15	6.00251e-15	-4.21296e-15	1.70545e-15
		1.45	-1.47407e-14	1.16527e-14	5.31613e-15	6.02484e-15	-4.13511e-16	4.13779e-15
		1.47	-1.07661e-14	1.18046e-14	-2.99946e-15	4.97846e-15	-2.33171e-15	3.44332e-15
		1.49	-1.057e-14	1.11979e-14	-2.95186e-15	3.3305e-15	-4.62013e-15	1.54918e-15
		1.51	-8.4164e-15	1.15125e-14	3.57333e-15	2.65039e-15	-2.98684e-15	4.24686e-15
		1.53	-1.11708e-14	1.1567e-14	3.23007e-15	3.09501e-15	-9.35625e-15	7.6038e-15
		1.55	-1.42961e-14	1.07554e-14	2.98026e-15	3.16082e-15	-5.42435e-15	3.94084e-15
		1.57	-1.21079e-14	1.11579e-14	-6.83673e-15	1.06258e-14	-5.2414e-15	4.33335e-15
		1.59	-5.6522e-15	1.2813e-14	2.36584e-15	5.04128e-15	-5.67067e-15	5.02233e-15
		1.61	-1.26279e-14	1.14628e-14	-4.88443e-15	5.36615e-15	-4.11411e-15	4.6332e-15
		1.63	-6.93781e-15	1.21348e-14	9.48484e-15	8.43916e-15	-4.80793e-15	2.63566e-15
		1.65	-1.32519e-14	1.11615e-14	1.61771e-15	1.78681e-15	-3.55484e-15	4.22502e-15
		1.67	-1.10804e-14	9.30388e-15	-9.10595e-16	3.48993e-15	-6.43554e-16	3.63495e-15
		1.69	-4.45946e-15	1.28906e-14	-8.48358e-15	9.67556e-15	3.16243e-15	4.66483e-15
		1.71	-1.01618e-14	1.43513e-14	-4.288e-15	6.61014e-15	-4.02016e-15	4.37725e-15
		1.73	-9.60553e-15	1.21561e-14	3.24506e-15	2.21302e-15	-6.02928e-15	3.35118e-15
		1.75	-1.35728e-14	1.17147e-14	-6.87218e-16	3.75607e-15	-7.80492e-15	4.90336e-15
		1.77	-1.36637e-14	8.74243e-15	2.47941e-15	3.39917e-15	-4.77499e-15	2.36478e-15
		1.79	-1.24137e-14	1.16561e-14	-3.97019e-16	3.20785e-15	-7.17935e-15	4.54632e-15
		1.81	-1.24417e-14	1.06729e-14	-3.93339e-15	5.7439e-15	-1.30956e-14	5.31909e-15
		1.83	-1.60193e-14	1.24701e-14	-3.96325e-15	4.70964e-15	-1.13001e-14	5.62593e-15
		1.85	-9.29523e-15	1.27441e-14	5.92205e-15	3.30548e-15	-6.81713e-15	4.02829e-15
		1.87	-4.79054e-15	1.25591e-14	1.67839e-15	2.67173e-15	-1.09644e-14	4.37554e-15
		1.89	-6.36342e-15	1.34466e-14	8.88573e-15	4.50744e-15	-6.07925e-15	5.14959e-15
		1.91	-6.0246e-15	1.27888e-14	5.38302e-15	3.94904e-15	-5.48498e-15	6.50438e-15
		1.93	2.31827e-15	1.77594e-14	5.22811e-15	2.62728e-15	-1.30088e-14	4.98531e-15
		1.95	-8.58351e-15	1.16654e-14	5.11248e-15	3.05749e-15	-3.63032e-15	4.5112e-15
		1.97	-3.5517e-15	1.48097e-14	5.00235e-15	2.48071e-15	-9.27178e-15	4.49858e-15
		1.99	-1.55728e-14	9.20663e-15	-5.14948e-16	2.99881e-15	-1.46288e-14	9.28397e-15
		2.01	-9.06862e-15	1.0586e-14	-4.39261e-15	1.22297e-14	-1.47715e-14	6.6007e-15
		2.03	-6.18133e-15	1.06099e-14	2.87483e-15	6.07808e-15	-1.0768e-14	4.97398e-15
		2.05	-4.96168e-15	1.27141e-14	6.1814e-15	4.06754e-15	-1.09321e-14	6.72678e-15
		2.07	-1.61484e-14	1.01284e-14	9.00532e-15	5.56951e-15	-9.25099e-15	6.27998e-15
		2.09	-1.35655e-14	1.05042e-14	4.11912e-15	6.89373e-15	-1.30627e-14	7.2534e-15
		2.11	-1.1302e-14	1.08832e-14	3.3945e-15	5.69466e-15	-1.13604e-14	5.41767e-15
		2.13	-1.43168e-14	1.03014e-14	1.44641e-15	6.31839e-15	-1.02695e-14	4.0784e-15
		2.15	-1.24475e-14	9.51652e-15	7.48984e-15	5.87206e-15	-5.65423e-15	6.41629e-15
		2.17	-1.41919e-14	9.22458e-15	7.06497e-15	6.30399e-15	-1.12132e-14	4.46447e-15
		2.19	-1.61152e-14	8.91536e-15	3.34069e-15	2.90744e-15	-1.11699e-14	6.461e-15
		2.21	-1.41635e-14	8.03377e-15	4.31792e-15	5.59864e-15	-8.59453e-15	4.66105e-15
		2.23	-8.84788e-15	8.61579e-15	9.80033e-15	4.68033e-15	-4.14933e-15	6.7812e-15
		2.25	-1.01095e-14	1.15464e-14	8.67256e-15	2.76364e-15	-8.70654e-15	7.07516e-15
		2.27	-1.51334e-14	8.9073e-15	9.4277e-15	2.82051e-15	-1.12251e-14	6.0309e-15
		2.29	-1.47665e-14	9.34339e-15	3.99663e-15	8.46051e-15	-7.29017e-15	7.2245e-15
		2.31	-9.36856e-15	8.23425e-15	6.60547e-16	9.48336e-15	-9.35852e-15	7.29535e-15
		2.33	-9.20843e-15	8.75963e-15	1.39513e-15	6.5737e-15	-8.91965e-15	4.87136e-15
		2.35	-1.2531e-14	8.27427e-15	5.22102e-15	3.58669e-15	-3.44455e-15	8.2095e-15
		2.37	-7.04165e-15	1.13861e-14	3.74116e-15	5.80587e-15	-9.89906e-15	7.17451e-15
		2.39	-7.74054e-15	1.00143e-14	4.11977e-15	2.73172e-15	-9.16957e-15	5.85706e-15
		2.41	-9.25216e-15	7.8197e-15	5.3624e-16	6.185e-15	-1.10689e-14	5.33074e-15
		2.43	-8.63147e-15	9.86828e-15	-1.15633e-15	1.02409e-14	-3.86134e-15	6.87171e-15
		2.45	-1.10376e-14	9.03832e-15	-3.40855e-15	6.22817e-15	1.19168e-15	9.02319e-15
		2.47	-2.76784e-15	1.24551e-14	-8.56388e-15	4.13421e-15	-6.41822e-15	6.86761e-15
		2.49	-1.16226e-14	8.95662e-15	-1.05168e-14	1.08279e-14	-8.4999e-15	5.0047e-15
		2.51	-9.30938e-15	8.65393e-15	-2.36589e-16	4.05269e-15	-1.18002e-14	7.41537e-15
		2.53	-1.19577e-14	6.83572e-15	1.92587e-15	2.80797e-15	-1.24619e-14	5.21235e-15
		2.55	-1.15891e-14	7.65551e-15	-1.49695e-17	4.10021e-15	-1.18813e-14	7.8031e-15
		2.57	-7.59154e-15	1.03869e-14	-1.25402e-15	4.36825e-15	-1.03564e-14	4.39147e-15
		2.59	-8.61719e-15	7.80354e-15	-4.28499e-15	4.8736e-15	-6.14385e-15	5.73313e-15
		2.61	-8.62814e-15	6.94362e-15	-7.27842e-15	5.48801e-15	-5.80867e-15	5.92213e-15
		2.63	-3.41875e-15	7.9207e-15	-5.58299e-15	3.7807e-15	-1.15186e-14	7.99322e-15
		2.65	-4.26755e-15	1.07037e-14	3.84376e-15	1.93163e-15	-9.65201e-15	5.79767e-15
		2.67	-5.3334e-15	7.99746e-15	1.69768e-15	3.57222e-15	-1.65041e-14	7.82905e-15
		2.69	-7.18387e-15	8.83055e-15	-3.07649e-15	2.9501e-15	-1.29296e-14	7.79682e-15
		2.71	-3.9323e-15	9.50236e-15	5.35173e-15	3.84831e-15	-1.62973e-14	7.7447e-15
		2.73	-4.28553e-15	9.73312e-15	5.64589e-15	9.35109e-15	-1.04468e-14	6.30763e-15
		2.75	-1.51235e-15	9.343e-15	-5.91038e-15	7.28623e-15	-1.44421e-14	7.05474e-15
		2.77	-5.81993e-15	9.32912e-15	1.09797e-15	3.01664e-15	-1.31187e-14	5.00181e-15
		2.79	-6.58998e-15	8.73988e-15	8.0264e-15	3.402e-15	-1.01112e-14	5.7625e-15
		2.81	-1.45353e-15	1.09346e-14	8.61371e-15	2.66015e-15	-1.58909e-14	7.29532e-15
		2.83	-1.24177e-14	7.63009e-15	-2.54692e-15	4.69333e-15	-1.29303e-14	6.62912e-15
		2.85	-9.90375e-15	8.69071e-15	4.0457e-16	2.73334e-15	-1.2205e-14	6.46078e-15
		2.87	-1.05363e-14	7.36478e-15	5.10718e-15	7.32824e-15	-1.82831e-14	9.14138e-15
		2.89	-5.19492e-15	9.02612e-15	1.57242e-15	4.59239e-15	-1.864e-14	8.09471e-15
		2.91	-6.49958e-15	8.12536e-15	-3.60097e-15	2.96847e-15	-1.23362e-14	7.19023e-15
		2.93	-1.12288e-14	7.59464e-15	-3.72546e-15	5.21613e-15	-1.36771e-14	6.37279e-15
		2.95	-4.72891e-15	8.91864e-15	-1.03134e-16	2.03439e-15	-1.36897e-14	6.74347e-15
		2.97	-4.27762e-15	1.00946e-14	-5.33723e-16	2.94599e-15	-1.43986e-14	8.41487e-15
		2.99	-4.73607e-15	5.8892e-15	-4.17632e-15	1.85414e-15	-1.15539e-14	8.1499e-15
		3.01	-6.79361e-15	9.1475e-15	5.84831e-15	3.2461e-15	-2.08252e-14	1.02307e-14
		3.03	-1.73436e-15	8.20231e-15	2.08149e-15	3.73907e-15	-1.10727e-14	7.82028e-15
		3.05	-4.97152e-15	8.41508e-15	7.44741e-15	4.53018e-15	-1.21643e-14	5.81163e-15
		3.07	-6.42109e-15	7.80846e-15	5.81317e-15	5.1424e-15	-1.95651e-14	6.72937e-15
		3.09	3.20857e-15	1.33494e-14	-7.60144e-15	5.5521e-15	-7.76201e-15	1.02964e-14
		3.11	-4.19512e-15	9.84989e-15	8.36905e-17	3.19991e-15	-1.85934e-14	7.81118e-15
		3.13	-8.22336e-15	8.06892e-15	3.17292e-15	3.6687e-15	-1.44384e-14	6.46476e-15
		3.15	-3.25803e-15	7.06148e-15	-2.38103e-15	3.20441e-15	-1.55037e-14	8.86211e-15
		3.17	-3.20478e-15	8.46216e-15	-1.00037e-14	4.48488e-15	-1.3542e-14	8.16644e-15
		3.19	-1.03621e-14	6.714e-15	-8.2801e-15	4.63461e-15	-1.49243e-14	7.19302e-15
		3.21	-3.4833e-15	8.01725e-15	-6.27087e-15	4.95336e-15	-1.78511e-14	9.28373e-15
		3.23	-7.47468e-15	6.69724e-15	-8.81672e-15	3.69299e-15	-1.06164e-14	7.75405e-15
		3.25	-1.02948e-14	9.14706e-15	-4.08871e-15	4.65945e-15	-1.13886e-14	6.27168e-15
		3.27	-6.7013e-15	6.20944e-15	-1.14647e-14	9.93208e-15	-1.18355e-14	6.94144e-15
		3.29	-9.63307e-15	7.14146e-15	1.63845e-15	2.99812e-15	-1.47777e-14	6.67179e-15
		3.31	-7.44119e-15	6.2841e-15	-4.01466e-15	5.80761e-15	-1.2607e-14	7.7161e-15
		3.33	-1.56619e-14	7.909e-15	2.64535e-15	5.22001e-15	-1.11358e-14	5.81929e-15
		3.35	-7.43388e-15	6.70553e-15	-7.66882e-15	8.12361e-16	-1.8751e-14	7.69737e-15
		3.37	-1.04417e-14	6.89006e-15	-4.70429e-16	6.07864e-15	-2.00447e-14	7.82666e-15
		3.39	-8.43224e-15	7.18913e-15	8.14582e-17	2.79371e-15	-2.35201e-14	8.26079e-15
		3.41	-1.65809e-14	7.79554e-15	-5.7642e-15	5.28469e-15	-1.89653e-14	7.58078e-15
		3.43	-9.88342e-15	7.05228e-15	8.77008e-16	3.09626e-15	-1.76348e-14	7.79116e-15
		3.45	-1.04302e-14	6.61162e-15	2.1116e-15	2.46994e-15	-1.38666e-14	8.16411e-15
		3.47	1.44188e-15	9.85592e-15	-2.26581e-15	7.36618e-15	-1.75086e-14	8.39168e-15
		3.49	-9.46875e-15	6.92928e-15	-1.09434e-15	4.03869e-15	-1.23965e-14	7.19779e-15
		3.51	-1.0052e-14	5.66808e-15	-6.08066e-15	8.81485e-15	-1.64268e-14	7.02818e-15
		3.53	-1.44053e-14	6.72752e-15	-1.41576e-15	7.03947e-15	-2.12069e-14	8.78833e-15
		3.55	-5.93326e-15	5.84208e-15	4.29744e-15	6.06973e-15	-1.33054e-14	8.50719e-15
		3.57	-8.96479e-15	6.31036e-15	1.13934e-15	2.81807e-15	-1.74795e-14	1.06147e-14
		3.59	-7.46596e-15	8.06265e-15	5.23053e-15	2.27434e-15	-5.06842e-15	1.20551e-14
		3.61	-7.47024e-15	5.47796e-15	-1.87096e-15	2.7495e-15	-4.75825e-15	1.10684e-14
		3.63	-4.28531e-15	7.06555e-15	-7.35218e-16	5.26896e-15	-5.90894e-15	8.88607e-15
		3.65	-1.09459e-14	5.2597e-15	8.36449e-16	4.8599e-15	-2.10908e-15	1.50925e-14
		3.67	-9.27858e-15	5.59636e-15	-2.04092e-15	2.0171e-15	-1.54407e-14	9.82372e-15
		3.69	-5.42626e-15	6.22931e-15	-5.512e-15	4.10326e-15	-1.7613e-14	7.97659e-15
		3.71	-2.10831e-15	7.56701e-15	9.25386e-17	1.31548e-15	-2.1889e-14	1.12291e-14
		3.73	-3.19307e-15	7.1075e-15	-1.00075e-15	3.52091e-15	-1.63937e-14	8.95517e-15
		3.75	-4.02338e-15	7.32038e-15	2.37081e-15	4.99314e-15	-1.27579e-14	8.33489e-15
		3.77	-3.64894e-15	5.27031e-15	-8.57367e-15	6.78712e-15	-1.96654e-14	9.40156e-15
		3.79	-6.79601e-15	6.81465e-15	-2.1425e-15	4.80763e-15	-1.47665e-14	8.54926e-15
		3.81	-3.10198e-15	6.79689e-15	-4.38111e-15	3.95741e-15	-1.49356e-14	1.00092e-14
		3.83	-9.29487e-15	5.75515e-15	-9.86612e-16	3.83893e-15	-2.00796e-14	8.61929e-15
		3.85	-1.81945e-15	8.30314e-15	5.81699e-15	2.11518e-15	-1.58362e-14	9.60988e-15
		3.87	-5.29943e-15	6.28271e-15	-8.08492e-15	1.61003e-15	-1.99439e-14	1.34571e-14
		3.89	-4.71281e-15	7.09718e-15	-3.14536e-15	4.78869e-15	-1.36032e-14	7.81939e-15
		3.91	-4.1687e-15	8.11245e-15	-4.34266e-15	6.805e-15	-1.06587e-14	8.41257e-15
		3.93	-6.43861e-15	7.26467e-15	-2.41688e-15	2.95128e-15	-9.88744e-15	8.44178e-15
		3.95	1.21282e-15	1.03082e-14	-8.13447e-15	5.41727e-15	-7.81963e-15	8.79054e-15
		3.97	-8.29997e-15	5.52479e-15	-4.54884e-15	5.70532e-15	-6.84512e-15	9.82065e-15
		3.99	-6.51879e-15	8.59187e-15	-6.86109e-15	3.27377e-15	-1.19172e-14	7.48628e-15
		4.01	-2.75329e-15	6.10259e-15	-4.6732e-15	3.42742e-15	-1.6546e-14	7.7528e-15
		4.03	-1.94691e-15	5.7646e-15	-4.61382e-15	4.57354e-15	-1.66094e-14	7.37016e-15
		4.05	-1.32097e-15	8.60521e-15	4.52068e-15	6.75417e-15	-1.51278e-14	8.26183e-15
		4.07	-4.80671e-15	4.00166e-15	-1.46603e-14	6.34411e-15	-1.54171e-14	8.32357e-15
		4.09	-2.72193e-15	3.34607e-15	-6.29102e-15	4.19939e-15	-2.44916e-14	8.35959e-15
		4.11	-3.22762e-15	6.5329e-15	-7.5117e-15	4.03048e-15	-1.32782e-14	8.05452e-15
		4.13	-6.4605e-15	4.61432e-15	-1.40778e-14	8.94339e-15	-1.37402e-15	1.35003e-14
		4.15	-8.61201e-15	5.72479e-15	-9.3312e-15	6.86415e-15	-8.67987e-15	9.10357e-15
		4.17	-2.3717e-15	4.4056e-15	-9.55697e-15	9.1701e-15	-8.87681e-15	1.01826e-14
		4.19	-1.51024e-15	6.16692e-15	-1.96545e-14	1.09864e-14	-9.53581e-15	9.05509e-15
		4.21	-1.40541e-16	6.41423e-15	-1.04099e-14	7.92831e-15	-1.71756e-14	9.49456e-15
		4.23	-1.05111e-15	3.90919e-15	-2.62577e-15	8.51911e-15	-1.63184e-14	7.76042e-15
		4.25	8.46264e-16	5.34326e-15	-1.2327e-14	6.53171e-15	-1.17475e-14	7.32664e-15
		4.27	-4.28251e-15	5.44592e-15	-1.01381e-14	7.66964e-15	-6.95895e-15	8.71437e-15
		4.29	5.16256e-15	8.83405e-15	-8.57928e-15	6.78678e-15	-9.0558e-15	7.00089e-15
		4.31	-5.47166e-15	5.50402e-15	-7.83195e-15	7.38248e-15	-1.46569e-14	6.02074e-15
		4.33	-3.37467e-15	1.57247e-15	-8.78592e-15	4.52675e-15	-1.07134e-14	7.11315e-15
		4.35	-7.91511e-15	4.58189e-15	-1.13025e-14	3.53365e-15	-9.69259e-15	9.45405e-15
		4.37	1.8605e-16	3.64986e-15	2.06231e-15	1.00422e-14	-8.44451e-15	1.14607e-14
		4.39	-4.23001e-16	3.39149e-15	1.11664e-17	8.76143e-15	-8.85105e-15	7.60135e-15
		4.41	9.31537e-16	3.83449e-15	1.2838e-15	7.94772e-15	-1.7446e-14	7.56678e-15
		4.43	-2.53499e-15	2.79447e-15	-9.00481e-15	3.0733e-15	-5.85946e-15	1.24041e-14
		4.45	-6.54941e-15	6.48154e-15	-1.27231e-16	8.17397e-15	-2.34921e-15	1.41665e-14
		4.47	-2.82756e-15	2.93619e-15	-1.00099e-14	2.18517e-15	-1.67584e-14	7.39995e-15
		4.49	-6.93193e-16	2.39364e-15	-2.12121e-15	6.42538e-15	-1.71714e-14	6.83148e-15
		4.51	-4.57249e-15	4.29919e-15	-2.93287e-16	1.71362e-15	-1.43386e-14	5.9826e-15
		4.53	-6.01123e-15	2.87188e-15	-2.11884e-15	2.98127e-15	-1.26274e-14	8.46706e-15
		4.55	-6.99699e-15	3.00437e-15	-5.24912e-15	4.92827e-15	-1.04367e-14	8.1641e-15
		4.57	-1.38695e-15	3.46658e-15	-2.78188e-15	2.10238e-15	-7.56913e-15	8.97254e-15
		4.59	-5.05755e-15	3.20623e-15	7.7059e-16	3.12416e-15	-1.65328e-14	5.52799e-15
		4.61	1.85814e-15	4.62212e-15	7.13597e-16	7.60548e-16	-7.00188e-15	1.10571e-14
		4.63	-2.40703e-16	4.45035e-15	1.77626e-15	4.71818e-15	-7.45444e-15	7.47811e-15
		4.65	-1.04558e-15	3.44757e-15	3.70232e-15	2.31857e-15	-7.57115e-15	7.58828e-15
		4.67	1.42445e-15	5.14879e-15	6.44091e-15	8.91969e-15	-1.20892e-14	4.99517e-15
		4.69	-8.06475e-15	6.93962e-15	3.67905e-15	6.30022e-15	-1.05068e-14	7.27598e-15
		4.71	-3.88132e-15	3.35061e-15	2.53675e-15	5.09989e-15	-5.47304e-15	8.22537e-15
		4.73	-4.37947e-16	4.64059e-15	5.40205e-15	4.74677e-15	-1.73977e-14	5.38269e-15
		4.75	-3.18844e-15	3.33241e-15	-4.40086e-16	2.26734e-15	-6.69647e-15	4.67197e-15
		4.77	-3.25128e-15	2.02767e-15	4.59791e-15	6.78226e-15	-6.8833e-15	8.87682e-15
		4.79	-6.8759e-15	4.13431e-15	-1.46261e-15	3.20465e-15	-7.20621e-16	1.00811e-14
		4.81	-1.0502e-15	2.86754e-15	3.07708e-15	3.32543e-15	-8.172e-15	7.60204e-15
		4.83	-4.52772e-15	3.70899e-15	7.85145e-16	3.6498e-15	-1.09394e-14	4.75057e-15
		4.85	-1.42695e-15	2.39032e-15	3.64228e-15	2.19621e-15	-1.01458e-14	5.69461e-15
		4.87	-1.0115e-14	4.48798e-15	-9.10986e-16	4.84818e-15	-7.27189e-15	5.33162e-15
		4.89	-7.24282e-15	2.04053e-15	4.71679e-15	5.65282e-15	-1.26043e-14	3.4007e-15
		4.91	-3.01942e-15	3.24922e-15	2.44996e-15	4.10031e-15	-8.03698e-15	3.72558e-15
		4.93	-2.66554e-15	1.79092e-15	1.09199e-15	2.06982e-15	-5.07537e-15	4.94329e-15
		4.95	-5.79046e-16	2.64399e-15	-2.86651e-15	8.51993e-15	-1.59178e-14	6.10255e-15
		4.97	-1.81936e-15	1.84306e-15	-1.24276e-15	5.39421e-15	-7.00947e-15	3.90572e-15
		4.99	6.79236e-16	3.22437e-15	1.90511e-15	3.24641e-15	-6.92275e-15	2.63339e-15
		5.01	-2.4074e-15	4.58789e-15	-4.15417e-15	3.11758e-15	-5.50667e-15	4.29021e-15
		5.03	-1.82679e-15	1.49497e-15	1.63222e-15	1.69932e-15	-1.0517e-14	5.00969e-15
		5.05	2.53744e-15	4.53721e-15	6.28758e-16	3.82224e-15	-5.45645e-15	2.5439e-15
		5.07	6.29251e-16	2.41342e-15	-4.72742e-15	5.12084e-15	-1.1141e-14	3.92228e-15
		5.09	1.3833e-15	3.96236e-15	-3.98187e-16	4.11078e-15	-6.09166e-15	3.61465e-15
		5.11	-2.6038e-15	2.10711e-15	3.22111e-15	3.5482e-15	-9.05503e-15	3.01186e-15
		5.13	1.44788e-15	4.15923e-15	8.5858e-16	4.85026e-15	-1.95913e-15	5.24199e-15
		5.15	-1.24138e-15	2.31869e-15	-8.05478e-15	3.39975e-15	-4.84634e-15	2.98904e-15
		5.17	2.58639e-15	1.62628e-15	-9.93649e-15	9.66737e-15	-1.27084e-14	4.61044e-15
		5.19	2.08003e-17	3.63464e-15	-2.7636e-15	5.34302e-15	-9.55962e-15	2.36698e-15
		5.21	-1.70284e-15	1.83458e-15	1.13459e-15	3.82456e-15	-8.27338e-15	5.98446e-16
		5.23	-5.22623e-15	2.37114e-15	3.01142e-15	4.30626e-15	-3.21956e-15	3.01034e-15
		5.25	-8.19674e-16	1.62367e-15	2.35828e-15	3.99146e-15	-8.76442e-15	4.6993e-15
		5.27	-4.43971e-15	5.83747e-15	-1.43679e-15	2.47939e-15	-7.41546e-15	4.35125e-15
		5.29	-7.39694e-15	6.88883e-15	5.84381e-15	4.85109e-15	-8.30934e-15	3.01047e-15
		5.31	-1.01181e-15	3.2189e-15	3.6134e-15	2.07896e-15	-1.54367e-14	6.17186e-15
		5.33	-3.41259e-15	2.21718e-15	2.27953e-15	2.31252e-15	-7.36306e-15	3.84093e-15
		5.35	1.55855e-15	3.50905e-15	6.42711e-15	3.77361e-15	-6.56237e-15	2.94048e-15
		5.37	-7.69038e-15	5.4867e-15	3.7968e-15	3.91965e-15	-3.63601e-15	3.28336e-15
		5.39	1.41614e-15	3.99249e-15	1.25212e-15	4.64098e-15	-2.59443e-15	6.4962e-15
		5.41	2.70593e-15	5.5992e-15	6.1314e-15	3.22503e-15	-1.16949e-15	6.52567e-15
		5.43	-6.66207e-15	2.48828e-15	1.83023e-15	6.18961e-15	4.49904e-15	1.02737e-14
		5.45	-1.00334e-14	5.80012e-15	9.17107e-15	1.8801e-15	8.41623e-15	1.46442e-14
		5.47	-1.32092e-14	7.22203e-15	3.67521e-15	3.43468e-15	-1.01605e-14	7.20574e-15
		5.49	-6.83483e-15	1.64395e-15	5.64694e-15	4.18133e-15	-5.1178e-15	6.64828e-15
		5.51	-4.93484e-15	4.73141e-15	8.58978e-15	2.16375e-15	2.71823e-15	1.0821e-14
		5.53	-8.92306e-15	2.48435e-15	1.68067e-15	3.72862e-15	-5.65593e-15	6.3356e-15
		5.55	-1.18432e-14	5.81929e-15	3.07329e-15	5.35542e-15	-1.39257e-14	7.91699e-15
		5.57	-4.54968e-15	3.39331e-15	2.12292e-15	5.15547e-15	-1.02437e-15	6.09562e-15
		5.59	-5.84787e-15	2.84176e-15	5.52856e-15	4.90777e-15	-6.66822e-15	6.9299e-15
		5.61	-6.75759e-15	5.12375e-15	2.90022e-15	3.26435e-15	-1.00212e-14	6.95803e-15
		5.63	-9.79974e-15	5.56432e-15	6.57766e-15	2.95083e-15	-2.02435e-15	1.08843e-14
		5.65	-3.64726e-15	4.59043e-15	7.11178e-15	5.00064e-15	-3.97074e-15	9.14118e-15
		5.67	-6.82707e-15	7.97083e-15	7.08209e-15	3.99861e-15	-2.24682e-15	7.38956e-15
		5.69	-1.09089e-14	6.81017e-15	9.29768e-15	3.82392e-15	4.81521e-15	9.6869e-15
		5.71	-3.94083e-15	2.44391e-15	1.15557e-14	6.30425e-15	1.49212e-15	7.12472e-15
		5.73	-1.07143e-14	4.08562e-15	2.3731e-15	5.26626e-15	5.123e-16	8.04254e-15
		5.75	-7.77727e-15	5.45133e-15	5.90319e-15	4.39591e-15	-4.31288e-15	9.00502e-15
		5.77	-5.07875e-15	3.0618e-15	1.30688e-14	6.6531e-15	-6.85167e-15	9.81721e-15
		5.79	-7.03491e-15	2.23645e-15	7.58036e-15	7.13958e-15	-4.24849e-15	9.44966e-15
		5.81	1.66724e-15	5.39841e-15	8.13271e-15	4.51678e-15	6.91842e-16	8.78869e-15
		5.83	-5.96387e-15	2.15672e-15	1.11368e-14	5.31354e-15	-4.12478e-15	9.24167e-15
		5.85	-8.66716e-15	4.82583e-15	1.31207e-14	6.25927e-15	-5.06997e-16	7.48616e-15
		5.87	-1.12705e-14	3.66705e-15	1.32224e-14	4.07576e-15	-4.40232e-15	9.99488e-15
		5.89	-4.28355e-15	3.12131e-15	4.5857e-15	4.83149e-15	-3.24194e-15	9.91165e-15
		5.91	-6.33174e-15	2.99992e-15	7.9719e-15	4.20674e-15	2.6172e-15	8.30174e-15
		5.93	-8.48856e-16	2.8013e-15	8.85098e-15	6.78776e-15	-4.25625e-16	8.16746e-15
		5.95	-5.83968e-15	2.28907e-15	1.22505e-14	4.69209e-15	3.45846e-15	9.15412e-15
		5.97	-9.47773e-15	6.34756e-15	7.60991e-15	6.74239e-15	-5.07216e-15	1.02984e-14
		5.99	-3.68164e-15	2.72014e-15	9.20163e-15	5.26911e-15	2.94868e-16	1.05375e-14
		6.01	-2.02801e-15	2.73802e-15	5.51286e-15	5.91907e-15	-5.78414e-16	8.55157e-15
		6.03	-4.56431e-15	2.96777e-15	1.31191e-14	7.34172e-15	-3.02766e-15	1.16431e-14
		6.05	-2.11012e-15	3.0779e-15	2.85656e-15	5.27957e-15	6.00704e-15	9.5199e-15
		6.07	-2.63687e-15	3.60865e-15	9.5474e-15	5.2547e-15	1.33873e-14	7.82922e-15
		6.09	-3.65163e-15	2.86154e-15	1.16058e-14	6.52484e-15	4.65694e-15	1.26376e-14
		6.11	-9.29791e-16	2.30983e-15	6.74441e-15	5.87112e-15	8.10249e-15	1.10011e-14
		6.13	-2.70084e-15	2.82211e-15	1.32975e-14	6.71729e-15	1.18363e-14	5.54702e-15
		6.15	-2.57154e-15	4.68923e-15	9.77768e-15	4.89863e-15	8.13803e-15	8.98788e-15
		6.17	-4.49062e-15	2.03524e-15	4.31056e-15	4.56514e-15	8.541e-15	1.01732e-14
		6.19	1.52115e-15	3.10329e-15	3.11334e-15	4.16157e-15	7.08784e-15	1.03462e-14
		6.21	-4.45509e-15	3.67012e-15	4.43451e-16	5.0944e-15	1.39274e-14	9.21855e-15
		6.23	3.75788e-17	2.67025e-15	1.4168e-16	4.05748e-15	1.43316e-14	8.20061e-15
		6.25	4.20392e-15	4.5257e-15	3.67878e-15	7.00401e-15	-2.31489e-16	1.11531e-14
		6.27	-1.60904e-15	4.96092e-15	4.12748e-16	5.02333e-15	-4.37421e-15	1.31203e-14
		6.29	9.73978e-16	3.48596e-15	7.90503e-15	2.3727e-15	7.90317e-15	1.09462e-14
		6.31	1.28277e-15	3.11953e-15	-2.51243e-15	3.69403e-15	2.86684e-15	9.70903e-15
		6.33	-4.68727e-15	4.91258e-15	4.6875e-15	4.53262e-15	1.20232e-15	1.41374e-14
		6.35	-3.11161e-15	3.63401e-15	5.34902e-15	2.81133e-15	1.62386e-14	1.10506e-14
		6.37	1.37576e-15	5.49671e-15	8.60372e-15	5.57602e-15	6.3536e-15	1.0846e-14
		6.39	-1.93945e-15	4.36964e-15	2.87442e-15	3.24705e-15	4.12919e-15	1.16992e-14
		6.41	-3.3817e-15	3.23466e-15	-2.16462e-15	5.87678e-15	1.02813e-14	1.03396e-14
		6.43	-4.72199e-15	2.31769e-15	-3.21645e-15	5.53765e-15	7.47541e-15	1.05589e-14
		6.45	-3.17516e-15	4.17406e-15	-1.24737e-14	4.9877e-15	2.91332e-15	9.22443e-15
		6.47	-6.1437e-16	3.19044e-15	-3.13275e-15	1.14426e-14	-5.06288e-16	1.45788e-14
		6.49	-4.56124e-15	4.6716e-15	-9.48036e-15	7.35715e-15	3.15426e-15	1.36882e-14
		6.51	-4.05756e-15	7.63889e-15	-7.01024e-15	7.49405e-15	-5.23639e-15	1.59225e-14
		6.53	-6.17867e-15	4.255e-15	-4.75543e-15	9.36406e-15	9.95095e-16	1.17746e-14
		6.55	-7.22809e-15	7.79255e-15	-1.10186e-14	8.28325e-15	8.66142e-16	1.39474e-14
		6.57	-2.02878e-15	4.24617e-15	-1.60162e-14	1.10795e-14	-2.56229e-15	1.86406e-14
		6.59	-2.79148e-15	5.37455e-15	4.96661e-16	1.17029e-14	9.35825e-15	1.36873e-14
		6.61	-1.5116e-15	4.12248e-15	-6.93462e-15	1.18076e-14	5.08872e-15	1.01278e-14
		6.63	-1.09482e-14	4.24089e-15	-6.49857e-15	1.43883e-14	5.50983e-15	1.03261e-14
		6.65	-1.013e-14	7.97545e-15	-4.22281e-15	1.12979e-14	-7.61727e-15	1.7665e-14
		6.67	-5.54384e-15	4.06858e-15	-9.94867e-16	1.3173e-14	-5.91059e-15	1.69194e-14
		6.69	1.27063e-15	3.00562e-15	1.75256e-15	1.0721e-14	2.15184e-15	1.23295e-14
		6.71	-2.62324e-15	3.98427e-15	-7.9287e-15	1.07378e-14	2.18112e-15	1.30197e-14
		6.73	8.39725e-16	4.1981e-15	-9.07916e-15	9.39702e-15	9.6567e-15	1.33252e-14
		6.75	-1.03459e-15	3.37682e-15	2.02868e-15	9.18348e-15	9.27355e-15	1.25171e-14
		6.77	-4.99834e-15	5.03054e-15	-9.47057e-15	5.68402e-15	9.26013e-15	1.19205e-14
		6.79	-6.24562e-15	6.38417e-15	-9.34573e-15	7.21603e-15	-8.34376e-16	1.60929e-14
		6.81	-4.50282e-15	4.42345e-15	-3.28253e-15	4.98154e-15	6.43559e-15	1.19092e-14
		6.83	7.56294e-16	4.22996e-15	-3.50776e-15	6.69054e-15	6.25447e-15	1.51389e-14
		6.85	-3.6078e-15	3.12434e-15	-7.81172e-16	4.92629e-15	1.99204e-15	1.50941e-14
		6.87	-3.3776e-15	6.14221e-15	1.74749e-15	4.75856e-15	1.96569e-17	1.71194e-14
		6.89	2.36564e-15	5.75037e-15	1.26614e-15	8.10364e-15	5.3729e-15	1.41806e-14
		6.91	9.5067e-16	2.05633e-15	5.31905e-16	5.81944e-15	2.49437e-15	1.48298e-14
		6.93	-3.49986e-15	4.52285e-15	2.1111e-15	4.0829e-15	1.02902e-14	1.37612e-14
		6.95	-2.39836e-15	3.51052e-15	2.35106e-15	1.72757e-15	7.205e-16	1.87061e-14
		6.97	6.22947e-16	2.81224e-15	4.49301e-15	5.25476e-15	6.54037e-15	1.70165e-14
		6.99	-7.71556e-15	6.3252e-15	9.06334e-16	4.90164e-15	1.2854e-14	1.44345e-14
		7.01	-1.17724e-14	1.01769e-14	6.06426e-16	2.49584e-15	7.3539e-15	1.79142e-14
		7.03	3.1335e-15	2.90042e-15	4.64745e-15	4.19487e-15	9.77713e-15	1.47334e-14
		7.05	-5.14465e-15	3.48324e-15	-1.84923e-15	5.27793e-15	1.0459e-14	1.73331e-14
		7.07	1.17731e-17	4.37056e-15	3.58161e-16	1.85334e-15	1.92779e-14	1.21811e-14
		7.09	-7.82558e-17	5.84233e-15	3.78112e-15	3.2953e-15	1.23164e-14	1.74705e-14
		7.11	-2.42813e-15	4.41428e-15	-6.15442e-15	4.16373e-15	5.24046e-15	1.72391e-14
		7.13	3.78588e-18	5.16178e-15	-3.78623e-15	5.74082e-15	1.38697e-14	1.24589e-14
		7.15	6.94144e-17	2.61507e-15	-6.80977e-16	4.03426e-15	1.113e-14	1.36937e-14
		7.17	-9.8768e-15	6.1498e-15	-3.42938e-15	2.12909e-15	8.45589e-15	1.60578e-14
		7.19	1.99911e-15	2.89486e-15	-1.2222e-14	7.12332e-15	1.24379e-14	1.53596e-14
		7.21	-2.7371e-15	4.40083e-15	3.39482e-15	5.3739e-15	1.41549e-14	1.08202e-14
		7.23	6.83757e-16	4.19518e-15	-3.06242e-16	5.40591e-15	1.53253e-14	1.24254e-14
		7.25	-1.28584e-15	2.69759e-15	2.35011e-15	5.34973e-15	1.5992e-14	1.24776e-14
		7.27	-1.11827e-15	3.44888e-15	5.23818e-16	6.72974e-15	1.33278e-14	1.41348e-14
		7.29	9.5069e-16	5.0914e-15	-1.01766e-14	8.09642e-15	1.52849e-14	1.03598e-14
		7.31	-3.38799e-16	3.01799e-15	-6.34609e-16	5.34508e-15	1.06723e-14	1.48178e-14
		7.33	8.24838e-16	4.1824e-15	-3.41626e-15	4.04939e-15	1.02273e-14	1.47165e-14
		7.35	-2.70978e-15	3.43774e-15	1.79127e-15	3.80322e-15	1.14717e-14	1.59773e-14
		7.37	-4.24002e-15	4.88932e-15	-7.14725e-16	5.21733e-15	6.50567e-15	1.37494e-14
		7.39	-3.51783e-15	5.1082e-15	1.14338e-15	5.89996e-15	1.44286e-14	1.11156e-14
		7.41	-3.22232e-15	3.06335e-15	-5.79588e-15	4.67981e-15	1.01076e-14	1.42155e-14
		7.43	-5.05479e-15	4.94442e-15	-2.43507e-15	7.1467e-15	1.08347e-14	1.26924e-14
		7.45	2.15706e-15	4.90496e-15	-1.38243e-15	4.48709e-15	7.92315e-15	1.61811e-14
		7.47	-2.54278e-15	4.48986e-15	-2.28046e-15	4.76999e-15	5.8258e-15	1.28413e-14
		7.49	-2.49955e-15	4.45157e-15	-5.21936e-15	4.13677e-15	9.54432e-15	1.32561e-14
		7.51	-1.13694e-15	3.75933e-15	-1.04182e-15	5.96006e-15	1.82768e-15	1.4537e-14
		7.53	-4.95674e-15	6.29113e-15	-8.10767e-15	5.43473e-15	1.00206e-14	1.44498e-14
		7.55	-6.8712e-16	3.65567e-15	-1.32263e-14	7.42643e-15	1.08651e-14	1.06215e-14
		7.57	1.91659e-15	2.90415e-15	-6.62146e-15	5.89403e-15	1.02841e-14	1.32099e-14
		7.59	-2.22838e-15	3.53778e-15	-2.17251e-15	5.50651e-15	9.13985e-15	1.5541e-14
		7.61	-3.20871e-15	3.40949e-15	-6.20691e-15	6.00563e-15	2.74382e-15	1.46593e-14
		7.63	-5.33184e-15	4.2728e-15	-1.54353e-15	3.70667e-15	4.80671e-15	9.027e-15
		7.65	4.68443e-17	4.55541e-15	-1.48998e-15	4.63932e-15	6.6688e-15	1.55576e-14
		7.67	-4.79263e-15	3.554e-15	-3.26096e-15	3.96671e-15	1.57694e-15	1.60366e-14
		7.69	-1.0428e-15	4.60681e-15	2.03504e-15	8.04238e-15	4.57233e-15	1.66004e-14
		7.71	-2.73663e-15	2.03085e-15	-4.42392e-15	4.80144e-15	-5.20632e-16	1.81946e-14
		7.73	-2.54821e-15	5.36277e-15	-3.23878e-16	4.88212e-15	1.19854e-15	1.75545e-14
		7.75	-3.35064e-15	3.48187e-15	-1.05129e-17	5.6511e-15	5.65935e-15	1.71637e-14
		7.77	-2.05037e-15	3.41871e-15	-3.61681e-15	2.39731e-15	8.63952e-15	1.38669e-14
		7.79	-8.84947e-16	3.30835e-15	1.51816e-15	4.33142e-15	9.26659e-15	1.3539e-14
		7.81	-8.55981e-15	8.20033e-15	1.65133e-15	2.61874e-15	4.13402e-15	1.59637e-14
		7.83	-1.06454e-15	2.15567e-15	-3.86155e-15	7.28332e-15	6.19323e-15	1.50628e-14
		7.85	-9.6628e-15	1.01542e-14	2.6051e-15	4.43948e-15	4.69252e-15	1.54385e-14
		7.87	-9.06902e-15	6.68542e-15	2.16127e-15	5.15697e-15	1.93005e-15	1.69969e-14
		7.89	-9.70043e-15	9.59034e-15	4.42901e-15	4.02621e-15	1.02396e-14	1.59549e-14
		7.91	-1.43323e-14	1.44192e-14	-4.61711e-15	2.92121e-15	5.49323e-15	1.49995e-14
		7.93	-1.1392e-14	1.21784e-14	-3.12375e-15	3.98839e-15	1.01167e-14	1.25965e-14
		7.95	-1.21795e-14	1.53746e-14	1.30581e-15	5.41655e-15	1.60412e-14	8.35994e-15
		7.97	-1.02678e-14	1.22002e-14	7.15271e-16	3.8234e-15	1.37255e-14	9.88132e-15
		7.99	-1.42216e-14	1.49684e-14	-1.2471e-15	4.97716e-15	1.28857e-14	1.07376e-14
		8.01	-1.11784e-14	1.11037e-14	6.5343e-17	1.66257e-15	1.1661e-14	6.1348e-15
		8.03	-6.96536e-15	9.43265e-15	6.10175e-15	2.88922e-15	9.77239e-15	1.34879e-14
		8.05	-1.10037e-14	1.15726e-14	-5.4093e-16	3.38955e-15	1.2472e-15	1.46533e-14
		8.07	-1.26127e-14	1.10405e-14	3.06789e-16	3.16716e-15	3.79408e-15	9.70971e-15
		8.09	1.24916e-15	5.01335e-15	3.0726e-15	5.5078e-15	3.29351e-15	1.42451e-14
		8.11	1.86256e-15	2.4227e-15	-1.81015e-15	6.02801e-15	1.21609e-15	1.45259e-14
		8.13	1.40034e-15	4.25354e-15	-1.85194e-15	1.95181e-15	5.85139e-15	1.65207e-14
		8.15	3.73989e-16	4.99945e-15	2.3722e-16	6.19479e-15	5.87144e-15	1.36177e-14
		8.17	-2.10197e-15	3.10656e-15	2.55681e-15	5.95676e-15	4.35979e-15	9.14375e-15
		8.19	-3.96919e-15	3.03778e-15	-6.91381e-16	4.80618e-15	1.28485e-14	6.34191e-15
		8.21	-3.97309e-15	4.07023e-15	5.3272e-16	4.35258e-15	4.26655e-15	2.00505e-14
		8.23	-4.0367e-15	2.84045e-15	5.5048e-15	3.13899e-15	6.26343e-15	1.45332e-14
		8.25	-3.98658e-15	2.4922e-15	-4.76862e-15	5.29186e-15	1.74221e-15	2.12825e-14
		8.27	-6.58648e-15	4.80478e-15	5.7179e-15	3.30781e-15	2.48688e-15	1.59088e-14
		8.29	-2.92667e-15	2.54898e-15	2.59174e-15	4.43494e-15	7.68494e-16	1.97773e-14
		8.31	-3.25217e-15	3.20797e-15	4.71579e-15	7.35009e-15	8.86771e-15	2.1305e-14
		8.33	-5.48905e-15	4.63443e-15	2.90257e-15	5.90641e-15	2.97452e-15	1.63064e-14
		8.35	-7.26117e-15	2.74294e-15	2.58317e-15	3.82456e-15	1.06316e-14	2.25413e-14
		8.37	-9.87925e-15	7.22464e-15	-3.59544e-15	8.01801e-15	3.27337e-15	1.49992e-14
		8.39	-8.49001e-15	9.55573e-15	3.47949e-15	2.58927e-15	3.08341e-15	1.49304e-14
		8.41	-5.72064e-15	3.49216e-15	1.28734e-15	3.5625e-15	9.68008e-15	1.9426e-14
		8.43	-4.02191e-15	2.40098e-15	2.12672e-15	3.43477e-15	-1.85882e-15	1.77425e-14
		8.45	-8.60709e-15	2.60943e-15	-8.63775e-15	3.15229e-15	-3.75945e-15	1.66037e-14
		8.47	-3.41019e-16	2.34399e-15	4.44311e-15	4.84724e-15	-3.43652e-16	1.92106e-14
		8.49	-4.04438e-15	4.13301e-15	2.60492e-15	4.59926e-15	-3.50877e-16	1.83925e-14
		8.51	-2.66447e-15	1.57263e-15	2.0068e-15	4.48232e-15	3.26063e-16	1.58384e-14
		8.53	-2.35135e-15	2.1205e-15	4.80183e-15	1.33189e-15	4.93491e-15	1.71516e-14
		8.55	2.3501e-15	2.69763e-15	-1.06994e-14	8.4816e-15	-5.94367e-15	2.12637e-14
		8.57	2.47061e-15	5.38492e-15	-3.20133e-15	6.85428e-15	-1.97721e-15	2.21531e-14
		8.59	1.39042e-15	3.22321e-15	1.48914e-15	3.33586e-15	-2.25691e-15	1.96374e-14
		8.61	-7.55483e-15	7.80821e-15	-5.05009e-15	4.15094e-15	-4.74701e-15	2.10391e-14
		8.63	-1.42724e-15	2.298e-15	-4.66046e-15	4.78601e-15	1.23845e-14	8.0928e-15
		8.65	-7.78227e-15	5.4764e-15	1.06631e-15	6.08246e-15	1.69868e-15	1.61527e-14
		8.67	-1.07871e-14	7.98684e-15	1.59418e-15	3.89756e-15	5.8522e-15	1.3273e-14
		8.69	-6.90039e-15	5.71411e-15	5.80927e-15	7.03997e-15	1.98017e-15	1.90406e-14
		8.71	-8.75015e-15	4.31425e-15	-1.16991e-14	7.05546e-15	1.70913e-15	1.65386e-14
		8.73	-1.0867e-14	8.10972e-15	5.80995e-16	5.85616e-15	-2.49439e-16	2.03802e-14
		8.75	-1.14088e-14	4.6983e-15	2.32796e-15	5.20448e-15	-2.76649e-15	2.0007e-14
		8.77	-1.02648e-14	5.92508e-15	-5.24352e-16	4.58591e-15	-5.59049e-15	2.26999e-14
		8.79	-9.71173e-15	7.33908e-15	4.8457e-15	6.91081e-15	1.30735e-15	1.70337e-14
		8.81	-1.29166e-14	6.5629e-15	-7.14789e-16	4.65043e-15	-6.17323e-15	2.29319e-14
		8.83	-1.13242e-14	7.12717e-15	6.2631e-17	5.54239e-15	1.88832e-15	1.76689e-14
		8.85	-1.15286e-14	5.9358e-15	6.38073e-16	7.39389e-15	-3.87585e-15	2.23357e-14
		8.87	-1.18491e-14	7.26716e-15	-2.03158e-15	7.71644e-15	7.07207e-15	1.3991e-14
		8.89	-1.1407e-14	8.73101e-15	1.94935e-15	6.35487e-15	5.49956e-15	1.87545e-14
		8.91	-6.87261e-15	5.68308e-15	1.75632e-15	6.26717e-15	-1.79952e-15	1.84766e-14
		8.93	-1.20697e-14	7.71525e-15	-3.18475e-15	4.56344e-15	2.53871e-15	1.96464e-14
		8.95	-1.31267e-14	5.61764e-15	-3.10133e-15	4.52664e-15	3.76956e-15	2.00529e-14
		8.97	-1.19277e-14	6.66029e-15	-3.27655e-15	6.19692e-15	1.01093e-15	2.14728e-14
		8.99	-1.24789e-14	6.85695e-15	2.143e-15	5.43422e-15	-1.24712e-15	2.09266e-14
		9.01	-1.38594e-14	6.0978e-15	-6.10306e-16	8.32339e-15	9.24917e-15	1.48175e-14
		9.03	-9.27249e-15	5.08849e-15	-4.07153e-15	3.55596e-15	1.34386e-14	6.87624e-15
		9.05	-1.32874e-14	4.82747e-15	-1.26346e-15	5.14544e-15	4.46014e-15	1.71962e-14
		9.07	-1.35297e-14	5.3751e-15	3.08461e-15	3.1078e-15	1.55082e-15	1.68457e-14
		9.09	2.19716e-15	8.64237e-15	1.26203e-15	4.05096e-15	5.92243e-15	1.50612e-14
		9.11	-4.45285e-15	6.64628e-15	-2.62203e-15	5.16616e-15	3.78122e-15	1.44011e-14
		9.13	-6.57861e-15	5.50081e-15	3.13349e-15	2.91866e-15	3.78943e-15	1.53578e-14
		9.15	-7.20286e-15	4.29598e-15	-1.01183e-14	3.45676e-15	-6.7082e-17	2.13809e-14
		9.17	-8.0439e-15	3.97777e-15	-3.46565e-15	6.96359e-15	2.14571e-15	1.9388e-14
		9.19	-1.09732e-14	4.82509e-15	-6.45104e-15	6.76689e-15	6.60543e-15	1.66193e-14
		9.21	-1.02407e-14	4.79952e-15	-9.27456e-15	6.31865e-15	4.5411e-15	1.85006e-14
		9.23	-1.13384e-14	6.51559e-15	-7.58861e-15	6.12878e-15	-2.33264e-15	2.197e-14
		9.25	-1.08683e-14	4.87327e-15	-3.13927e-15	3.21653e-15	-4.65073e-16	1.99438e-14
		9.27	-9.93243e-15	5.99347e-15	-7.90245e-15	4.22442e-15	3.91661e-15	1.78666e-14
		9.29	-4.4472e-15	3.18752e-15	-4.64328e-15	2.205e-15	1.42255e-15	1.7658e-14
		9.31	-1.23446e-14	3.98118e-15	-1.44258e-14	7.73174e-15	2.41439e-15	2.05565e-14
		9.33	-9.36888e-15	4.66707e-15	-7.05247e-15	3.86583e-15	3.52405e-15	1.61737e-14
		9.35	-1.18575e-14	6.07749e-15	-5.35176e-15	2.34648e-15	-4.69438e-16	1.33888e-14
		9.37	-8.15103e-15	4.04074e-15	-3.57583e-15	6.15065e-15	-1.82802e-15	2.00713e-14
		9.39	-1.26499e-14	6.21582e-15	-1.11015e-14	3.46142e-15	6.25906e-16	2.00283e-14
		9.41	-1.51406e-14	8.39121e-15	1.2774e-15	6.78365e-15	-5.06192e-16	1.73072e-14
		9.43	-8.29936e-15	6.94027e-15	-1.04583e-14	6.5344e-15	6.18475e-15	1.68683e-14
		9.45	-8.59013e-15	4.37921e-15	-1.18303e-14	6.46316e-15	-3.00861e-15	2.19856e-14
		9.47	-8.95594e-15	6.73359e-15	-9.09532e-15	3.90203e-15	-7.88909e-16	1.95451e-14
		9.49	-9.03144e-15	5.53308e-15	-1.3339e-14	3.90307e-15	-2.61748e-15	2.13583e-14
		9.51	-4.40944e-15	5.62691e-15	-7.02365e-15	2.38862e-15	-7.04136e-15	2.33821e-14
		9.53	-1.24421e-14	7.38669e-15	-8.14709e-15	2.41751e-15	-4.48976e-15	2.5765e-14
		9.55	-2.97588e-15	6.94072e-15	-8.78382e-15	3.29001e-15	-4.99208e-15	2.59371e-14
		9.57	-1.02787e-14	4.49616e-15	-1.39287e-14	5.99545e-15	-4.69468e-15	2.22766e-14
		9.59	-5.11228e-15	7.31194e-15	4.06132e-16	6.3825e-15	-4.22067e-15	2.81423e-14
		9.61	-2.10754e-15	5.21851e-15	-6.84546e-15	5.46102e-15	4.13939e-15	2.0727e-14
		9.63	-1.08714e-14	8.00546e-15	3.54387e-15	8.50209e-15	-4.66665e-15	2.42535e-14
		9.65	-1.05355e-14	5.56715e-15	-1.0006e-14	4.38833e-15	-1.43761e-15	2.313e-14
		9.67	-7.84092e-15	5.7449e-15	-6.29389e-15	4.70927e-15	1.31221e-15	2.07463e-14
		9.69	-7.5394e-15	4.53022e-15	-1.24003e-14	2.24689e-15	-8.78327e-15	2.87584e-14
		9.71	-8.52542e-15	5.24868e-15	-1.33397e-14	6.0333e-15	-4.74294e-15	2.45635e-14
		9.73	-1.11444e-15	7.23072e-15	-6.86669e-15	4.19215e-15	-5.01139e-15	2.12827e-14
		9.75	-5.11673e-15	4.81541e-15	-5.80087e-15	2.92121e-15	-1.0311e-14	2.87491e-14
		9.77	-6.63031e-15	4.27058e-15	-6.23346e-15	4.78755e-15	-1.17395e-14	3.30986e-14
		9.79	-6.3078e-15	5.39518e-15	-1.18206e-14	2.72329e-15	-1.32185e-14	3.2474e-14
		9.81	-5.32846e-15	6.74267e-15	-1.39101e-14	6.05095e-15	-1.68638e-14	3.48558e-14
		9.83	4.48207e-16	1.18642e-14	-5.03844e-15	3.48125e-15	-1.75512e-14	3.23102e-14
		9.85	-1.09208e-14	6.49987e-15	-5.86664e-15	1.3467e-15	-1.57336e-14	3.51111e-14
		9.87	-8.75189e-15	5.67917e-15	-8.11253e-15	4.19853e-15	-1.09451e-14	2.9699e-14
		9.89	-4.52253e-15	5.56735e-15	-9.73426e-15	4.6167e-15	-8.90924e-15	2.89226e-14
		9.91	-1.65128e-14	5.84366e-15	-7.76217e-15	2.29986e-15	-1.19845e-14	3.33229e-14
		9.93	-1.17655e-14	5.29947e-15	-1.27822e-14	4.84985e-15	-1.61922e-14	3.15106e-14
		9.95	-1.02456e-14	6.85142e-15	-1.16142e-14	5.07028e-15	-1.14807e-14	3.11735e-14
		9.97	9.12773e-16	1.07248e-14	-5.23804e-15	2.48469e-15	-2.52922e-14	3.32648e-14
		9.99	-3.44858e-15	6.81859e-15	-6.15422e-15	4.26904e-15	-2.31139e-14	3.59027e-14
		10.01
		10.03
		10.05
		10.07
		10.09
		10.11
		10.13
		10.15
		10.17
		10.19
		10.21
		10.23
		10.25
		10.27
		10.29	5.05672e-13	4.85196e-14	4.00926e-13	2.71041e-14	6.05628e-13	1.15074e-13
		10.31	4.82383e-13	4.56592e-14	3.81557e-13	2.59461e-14	5.65006e-13	1.06603e-13
		10.33	4.81342e-13	4.59615e-14	3.6692e-13	2.62373e-14	5.48421e-13	1.06467e-13
		10.35	4.77557e-13	4.68246e-14	3.48843e-13	2.38928e-14	5.26877e-13	1.03532e-13
		10.37	4.79278e-13	4.65972e-14	3.48241e-13	2.04356e-14	5.1847e-13	1.03505e-13
		10.39	4.7398e-13	4.68246e-14	3.45876e-13	2.14512e-14	5.03075e-13	1.00781e-13
		10.41	4.84601e-13	4.81386e-14	3.30343e-13	2.06952e-14	4.84282e-13	1.00315e-13
		10.43	4.79525e-13	4.76713e-14	3.34267e-13	1.92439e-14	4.79801e-13	9.94533e-14
		10.45	4.7895e-13	4.70949e-14	3.30977e-13	2.21625e-14	4.68805e-13	1.00054e-13
		10.47	4.7976e-13	4.98649e-14	3.26914e-13	1.88496e-14	4.64282e-13	9.79798e-14
		10.49	4.75772e-13	4.99601e-14	3.24418e-13	1.93441e-14	4.49444e-13	9.73101e-14
		10.51	4.66899e-13	5.07078e-14	3.25909e-13	1.94606e-14	4.42218e-13	1.00319e-13
		10.53	4.622e-13	5.22155e-14	3.12911e-13	2.02945e-14	4.37698e-13	9.7436e-14
		10.55	4.62389e-13	5.20429e-14	3.14975e-13	1.90864e-14	4.31068e-13	9.82025e-14
		10.57	4.64129e-13	5.31001e-14	3.24061e-13	1.76974e-14	4.28026e-13	9.79578e-14
		10.59	4.66297e-13	5.29383e-14	3.14407e-13	1.77781e-14	4.20495e-13	9.66753e-14
		10.61	4.70242e-13	5.51462e-14	3.12902e-13	1.84517e-14	4.16443e-13	9.98988e-14
		10.63	4.70392e-13	5.55901e-14	3.13429e-13	1.73524e-14	4.1483e-13	9.67e-14
		10.65	4.70801e-13	5.47227e-14	3.18061e-13	1.80626e-14	4.04279e-13	9.66987e-14
		10.67	4.65582e-13	5.65973e-14	3.22382e-13	1.62648e-14	3.98541e-13	9.82902e-14
		10.69	4.61498e-13	5.4735e-14	3.1508e-13	1.72975e-14	3.95051e-13	1.0066e-13
		10.71	4.69589e-13	5.52867e-14	3.12875e-13	1.89613e-14	3.96736e-13	1.01024e-13
		10.73	4.68099e-13	5.45339e-14	3.13272e-13	1.56134e-14	3.94845e-13	9.75297e-14
		10.75	4.61922e-13	5.55394e-14	3.13984e-13	1.84308e-14	3.85489e-13	1.00326e-13
		10.77	4.63158e-13	5.54802e-14	3.20623e-13	1.64389e-14	3.87648e-13	1.00088e-13
		10.79	4.64831e-13	5.66462e-14	3.18003e-13	1.81793e-14	3.83006e-13	9.87376e-14
		10.81	4.54022e-13	5.47486e-14	3.08323e-13	1.62219e-14	3.82769e-13	9.8531e-14
		10.83	4.61294e-13	5.65657e-14	3.12042e-13	1.67699e-14	3.79135e-13	1.00456e-13
		10.85	4.6321e-13	5.69901e-14	3.13329e-13	1.83024e-14	3.77105e-13	9.9558e-14
		10.87	4.59697e-13	5.42061e-14	3.1952e-13	1.82171e-14	3.76571e-13	1.02246e-13
		10.89	4.62361e-13	5.59405e-14	3.15109e-13	1.72835e-14	3.72069e-13	9.94438e-14
		10.91	4.5857e-13	5.60507e-14	3.12019e-13	1.80032e-14	3.6705e-13	1.01972e-13
		10.93	4.57994e-13	5.48049e-14	3.06429e-13	2.0721e-14	3.7072e-13	1.02129e-13
		10.95	4.54179e-13	5.76614e-14	3.14395e-13	1.53577e-14	3.69333e-13	1.01936e-13
		10.97	4.5682e-13	5.72863e-14	3.10503e-13	1.85408e-14	3.67523e-13	1.02372e-13
		10.99	4.58786e-13	5.93639e-14	3.14408e-13	1.92029e-14	3.63762e-13	1.03301e-13
		11.01	4.61754e-13	5.76701e-14	3.07627e-13	1.69931e-14	3.58334e-13	1.0417e-13
		11.03	4.59035e-13	5.76132e-14	3.11164e-13	1.46339e-14	3.61942e-13	1.03058e-13
		11.05	4.5534e-13	5.80963e-14	3.11525e-13	1.68168e-14	3.591e-13	1.05523e-13
		11.07	4.54785e-13	5.76095e-14	3.11158e-13	1.78477e-14	3.56457e-13	1.04956e-13
		11.09	4.56499e-13	5.80783e-14	3.05602e-13	2.0456e-14	3.56846e-13	1.0659e-13
		11.11	4.48615e-13	5.76557e-14	3.15275e-13	2.00297e-14	3.52347e-13	1.06763e-13
		11.13	4.48627e-13	5.68897e-14	3.16024e-13	1.65555e-14	3.53894e-13	1.0504e-13
		11.15	4.46157e-13	5.88685e-14	3.02204e-13	2.05478e-14	3.48276e-13	1.08511e-13
		11.17	4.48497e-13	5.79848e-14	3.10025e-13	1.61861e-14	3.52972e-13	1.07679e-13
		11.19	4.55653e-13	5.83524e-14	3.06358e-13	1.56429e-14	3.50689e-13	1.06985e-13
		11.21	4.39455e-13	5.67098e-14	3.05394e-13	1.73941e-14	3.43412e-13	1.08306e-13
		11.23
		11.25
		11.27
		11.29	8.45403e-13	8.61224e-14	6.4773e-13	3.77473e-14	8.98771e-13	1.73021e-13
		11.31	8.41167e-13	8.80784e-14	6.37921e-13	3.7114e-14	8.88556e-13	1.7174e-13
		11.33	8.41249e-13	9.04266e-14	6.22157e-13	3.57064e-14	8.71168e-13	1.74287e-13
		11.35	8.4497e-13	9.13358e-14	6.19496e-13	3.70327e-14	8.61011e-13	1.75224e-13
		11.37	8.41073e-13	8.83398e-14	6.08919e-13	3.77635e-14	8.5268e-13	1.75845e-13
		11.39	8.43062e-13	8.98126e-14	5.99167e-13	3.63771e-14	8.52851e-13	1.76183e-13
		11.41	8.4321e-13	9.10698e-14	5.97658e-13	3.45993e-14	8.34189e-13	1.74963e-13
		11.43	8.3539e-13	8.88136e-14	5.97486e-13	3.51719e-14	8.16855e-13	1.74296e-13
		11.45	8.36565e-13	9.04768e-14	5.91661e-13	3.95368e-14	8.19008e-13	1.7509e-13
		11.47	8.36853e-13	9.03419e-14	5.954e-13	3.48053e-14	8.0776e-13	1.74068e-13
		11.49	8.31479e-13	9.17053e-14	5.82075e-13	3.67034e-14	7.95478e-13	1.77365e-13
		11.51	8.34693e-13	9.17578e-14	5.90938e-13	3.51842e-14	7.88981e-13	1.76238e-13
		11.53	8.34553e-13	9.29724e-14	5.83539e-13	3.4667e-14	7.82616e-13	1.74803e-13
		11.55	8.3356e-13	9.28382e-14	5.83208e-13	3.39582e-14	7.79598e-13	1.78069e-13
		11.57	8.26565e-13	9.33504e-14	5.85492e-13	3.36356e-14	7.6978e-13	1.77001e-13
		11.59	8.3264e-13	9.3208e-14	5.91274e-13	3.13881e-14	7.59955e-13	1.77593e-13
		11.61	8.25237e-13	9.3068e-14	5.74483e-13	3.41064e-14	7.55935e-13	1.75352e-13
		11.63	8.23278e-13	9.44405e-14	5.75405e-13	3.33206e-14	7.55598e-13	1.77095e-13
		11.65	8.26962e-13	9.47647e-14	5.73202e-13	3.23895e-14	7.53086e-13	1.78284e-13
		11.67	8.25488e-13	9.33413e-14	5.77846e-13	3.01144e-14	7.44676e-13	1.79272e-13
		11.69	8.22234e-13	9.26551e-14	5.71071e-13	2.75555e-14	7.49324e-13	1.7912e-13
		11.71	8.24759e-13	9.42454e-14	5.69587e-13	2.99696e-14	7.365e-13	1.80872e-13
		11.73	8.20376e-13	9.44134e-14	5.74585e-13	3.07393e-14	7.36301e-13	1.81939e-13
		11.75	8.25569e-13	9.44841e-14	5.73258e-13	2.69899e-14	7.39281e-13	1.80162e-13
		11.77	8.16711e-13	9.43319e-14	5.68468e-13	2.52767e-14	7.2842e-13	1.81508e-13
		11.79	8.193e-13	9.45398e-14	5.71305e-13	2.59165e-14	7.31739e-13	1.83389e-13
		11.81	8.15413e-13	9.55918e-14	5.70694e-13	2.72307e-14	7.29859e-13	1.82512e-13
		11.83	8.17651e-13	9.59461e-14	5.61497e-13	3.21369e-14	7.23005e-13	1.8302e-13
		11.85	8.16206e-13	9.57186e-14	5.55803e-13	3.57873e-14	7.24745e-13	1.83176e-13
		11.87	8.07206e-13	9.4012e-14	5.6735e-13	2.99466e-14	7.25325e-13	1.84456e-13
		11.89	8.06939e-13	9.40773e-14	5.62564e-13	2.86106e-14	7.22043e-13	1.8116e-13
		11.91	8.0576e-13	9.4479e-14	5.66272e-13	2.74456e-14	7.12647e-13	1.85417e-13
		11.93	8.05246e-13	9.41226e-14	5.67652e-13	2.52383e-14	7.09654e-13	1.87778e-13
		11.95	8.0417e-13	9.52953e-14	5.64514e-13	2.60067e-14	7.12399e-13	1.86431e-13
		11.97	8.03525e-13	9.21425e-14	5.66512e-13	2.57541e-14	7.17031e-13	1.85167e-13
		11.99	8.04177e-13	9.33348e-14	5.62059e-13	2.81329e-14	7.1127e-13	1.85451e-13
		12.01	7.97304e-13	9.03507e-14	5.62778e-13	2.70832e-14	7.07255e-13	1.8569e-13
		12.03	7.96305e-13	9.27346e-14	5.62145e-13	2.61495e-14	7.05198e-13	1.83492e-13
		12.05	7.95949e-13	9.30853e-14	5.59781e-13	2.70414e-14	7.12374e-13	1.85637e-13
		12.07	7.90266e-13	9.08424e-14	5.63746e-13	2.73675e-14	6.9699e-13	1.8507e-13
		12.09	7.90358e-13	9.26005e-14	5.59414e-13	2.47613e-14	6.93783e-13	1.85379e-13
		12.11	7.93844e-13	9.31949e-14	5.54871e-13	2.71061e-14	6.95352e-13	1.89806e-13
		12.13	7.87366e-13	9.27533e-14	5.60718e-13	2.60152e-14	6.94117e-13	1.84005e-13
		12.15	7.93288e-13	9.1864e-14	5.69872e-13	2.37023e-14	6.93763e-13	1.85327e-13
		12.17	7.83103e-13	9.1974e-14	5.56854e-13	2.62642e-14	6.85545e-13	1.87006e-13
		12.19	7.84491e-13	9.22932e-14	5.57157e-13	2.8293e-14	6.89312e-13	1.83352e-13
		12.21	7.84435e-13	9.26327e-14	5.4679e-13	2.72991e-14	6.87969e-13	1.8963e-13
		12.23
		12.25
		12.27
		12.29	1.16138e-12	1.09845e-13	8.88824e-13	4.49141e-14	1.23439e-12	2.48859e-13
		12.31	1.14553e-12	1.14174e-13	8.76262e-13	4.64412e-14	1.20683e-12	2.48402e-13
		12.33	1.14413e-12	1.1289e-13	8.66442e-13	4.48498e-14	1.19441e-12	2.4958e-13
		12.35	1.14982e-12	1.13808e-13	8.53576e-13	4.59073e-14	1.17882e-12	2.51867e-13
		12.37	1.14957e-12	1.1335e-13	8.52176e-13	4.32343e-14	1.17495e-12	2.52759e-13
		12.39	1.14742e-12	1.14654e-13	8.49967e-13	3.92007e-14	1.16742e-12	2.52496e-13
		12.41	1.14267e-12	1.16839e-13	8.33989e-13	4.00012e-14	1.1522e-12	2.54995e-13
		12.43	1.14134e-12	1.15859e-13	8.24422e-13	4.03314e-14	1.14814e-12	2.56375e-13
		12.45	1.13827e-12	1.15566e-13	8.23869e-13	3.92231e-14	1.1389e-12	2.57507e-13
		12.47	1.13851e-12	1.16584e-13	8.17826e-13	4.24371e-14	1.13045e-12	2.56309e-13
		12.49	1.13665e-12	1.15442e-13	8.20958e-13	3.70746e-14	1.1218e-12	2.53821e-13
		12.51	1.13719e-12	1.16806e-13	8.18031e-13	3.52164e-14	1.11136e-12	2.57171e-13
		12.53	1.13606e-12	1.1788e-13	8.13803e-13	3.618e-14	1.10067e-12	2.5696e-13
		12.55	1.13369e-12	1.15365e-13	8.08193e-13	3.73388e-14	1.09378e-12	2.61542e-13
		12.57	1.13093e-12	1.16498e-13	8.12029e-13	3.51299e-14	1.09475e-12	2.63837e-13
		12.59	1.1343e-12	1.19558e-13	8.05886e-13	3.56978e-14	1.0859e-12	2.64063e-13
		12.61	1.12417e-12	1.16816e-13	8.01959e-13	3.34496e-14	1.08219e-12	2.63642e-13
		12.63	1.12026e-12	1.16387e-13	8.02575e-13	3.24997e-14	1.07439e-12	2.60113e-13
		12.65	1.1161e-12	1.15786e-13	7.98933e-13	3.40206e-14	1.07515e-12	2.66942e-13
		12.67	1.12396e-12	1.18976e-13	8.02318e-13	3.3739e-14	1.07505e-12	2.61917e-13
		12.69	1.11598e-12	1.17843e-13	7.96163e-13	3.34387e-14	1.06883e-12	2.58686e-13
		12.71	1.11319e-12	1.165e-13	7.8926e-13	3.62636e-14	1.05772e-12	2.585e-13
		12.73	1.11083e-12	1.17019e-13	7.97527e-13	3.55219e-14	1.05219e-12	2.56166e-13
		12.75	1.10833e-12	1.16062e-13	7.91969e-13	3.62885e-14	1.05168e-12	2.57983e-13
		12.77	1.10669e-12	1.1639e-13	7.89009e-13	3.54568e-14	1.04006e-12	2.58391e-13
		12.79	1.10786e-12	1.17064e-13	7.84661e-13	3.58188e-14	1.04359e-12	2.57961e-13
		12.81	1.10424e-12	1.16378e-13	7.80304e-13	3.40525e-14	1.04392e-12	2.58256e-13
		12.83	1.09738e-12	1.16176e-13	7.88143e-13	3.06553e-14	1.03072e-12	2.57894e-13
		12.85	1.09001e-12	1.1621e-13	7.78521e-13	3.55848e-14	1.03544e-12	2.5832e-13
		12.87	1.09294e-12	1.15794e-13	7.73483e-13	3.80028e-14	1.03086e-12	2.57207e-13
		12.89	1.08951e-12	1.16217e-13	7.74354e-13	3.56065e-14	1.02562e-12	2.57479e-13
		12.91	1.08561e-12	1.15854e-13	7.66238e-13	3.85584e-14	1.02188e-12	2.58982e-13
		12.93	1.08919e-12	1.14728e-13	7.67701e-13	3.50454e-14	1.02647e-12	2.56498e-13
		12.95	1.08437e-12	1.16113e-13	7.71621e-13	3.57585e-14	1.02256e-12	2.59932e-13
		12.97	1.07615e-12	1.15607e-13	7.68017e-13	3.46043e-14	1.01973e-12	2.61258e-13
		12.99	1.07705e-12	1.15997e-13	7.66443e-13	3.48553e-14	1.01404e-12	2.57926e-13
		13.01	1.08378e-12	1.16415e-13	7.57669e-13	3.4374e-14	1.01211e-12	2.57339e-13
		13.03	1.0755e-12	1.16294e-13	7.57553e-13	3.33271e-14	1.00703e-12	2.58965e-13
		13.05	1.07006e-12	1.1541e-13	7.4618e-13	3.59435e-14	1.00781e-12	2.59428e-13
		13.07	1.07559e-12	1.15936e-13	7.5267e-13	3.33373e-14	1.00475e-12	2.60556e-13
		13.09	1.06591e-12	1.16008e-13	7.47652e-13	3.3447e-14	1.00336e-12	2.59401e-13
		13.11	1.05899e-12	1.15673e-13	7.55642e-13	3.10249e-14	9.95592e-13	2.59814e-13
		13.13	1.06236e-12	1.15995e-13	7.46846e-13	2.77928e-14	9.9485e-13	2.60256e-13
		13.15	1.06146e-12	1.15878e-13	7.45743e-13	2.92174e-14	9.92566e-13	2.59128e-13
		13.17	1.05552e-12	1.14937e-13	7.37349e-13	3.29805e-14	1.0018e-12	2.57542e-13
		13.19	1.05567e-12	1.14587e-13	7.37789e-13	3.05112e-14	9.9718e-13	2.57309e-13
		13.21	1.0528e-12	1.17541e-13	7.41278e-13	2.37579e-14	9.83062e-13	2.62054e-13
		13.23
		13.25
		13.27
		13.29	1.39427e-12	1.28273e-13	1.06061e-12	4.12405e-14	1.49438e-12	3.12134e-13
		13.31	1.3802e-12	1.30348e-13	1.02942e-12	3.96477e-14	1.48081e-12	3.10742e-13
		13.33	1.37854e-12	1.2931e-13	1.0259e-12	4.13024e-14	1.46462e-12	3.11052e-13
		13.35	1.40938e-12	1.26365e-13	1.02267e-12	3.91478e-14	1.4629e-12	3.08472e-13
		13.37	1.39875e-12	1.26734e-13	1.01512e-12	4.08746e-14	1.43846e-12	3.1132e-13
		13.39	1.40251e-12	1.25974e-13	1.01085e-12	4.00553e-14	1.41723e-12	3.1084e-13
		13.41	1.40573e-12	1.27746e-13	1.00191e-12	4.05742e-14	1.4129e-12	3.14116e-13
		13.43	1.38947e-12	1.30086e-13	1.00118e-12	4.232e-14	1.40084e-12	3.1168e-13
		13.45	1.38997e-12	1.29424e-13	9.99616e-13	3.90742e-14	1.387e-12	3.13947e-13
		13.47	1.38725e-12	1.28249e-13	9.94399e-13	4.15e-14	1.37288e-12	3.10871e-13
		13.49	1.38255e-12	1.30081e-13	1.0004e-12	3.46157e-14	1.36026e-12	3.07304e-13
		13.51	1.38497e-12	1.29531e-13	9.90866e-13	3.55154e-14	1.352e-12	3.09123e-13
		13.53	1.3853e-12	1.28378e-13	9.85673e-13	3.97604e-14	1.34303e-12	3.07286e-13
		13.55	1.36277e-12	1.3047e-13	9.8953e-13	3.57511e-14	1.34087e-12	3.0788e-13
		13.57	1.36143e-12	1.29524e-13	9.80183e-13	3.84075e-14	1.33066e-12	3.07417e-13
		13.59	1.36874e-12	1.29107e-13	9.73812e-13	3.72209e-14	1.32442e-12	3.07428e-13
		13.61	1.35951e-12	1.31167e-13	9.72481e-13	3.70245e-14	1.31509e-12	3.07643e-13
		13.63	1.35795e-12	1.29585e-13	9.76836e-13	3.42525e-14	1.30932e-12	3.04766e-13
		13.65	1.34454e-12	1.31765e-13	9.71501e-13	3.40905e-14	1.30155e-12	3.09705e-13
		13.67	1.3531e-12	1.2889e-13	9.65003e-13	3.11993e-14	1.3009e-12	3.07284e-13
		13.69	1.35357e-12	1.29771e-13	9.57288e-13	3.21528e-14	1.28588e-12	3.08499e-13
		13.71	1.34235e-12	1.30634e-13	9.51994e-13	3.27177e-14	1.28397e-12	3.08321e-13
		13.73	1.333e-12	1.30029e-13	9.50811e-13	3.96457e-14	1.28625e-12	3.0616e-13
		13.75	1.34131e-12	1.28792e-13	9.52005e-13	3.56825e-14	1.27992e-12	3.03548e-13
		13.77	1.33008e-12	1.31245e-13	9.44059e-13	3.65339e-14	1.2737e-12	3.0489e-13
		13.79	1.3292e-12	1.29582e-13	9.49185e-13	3.46321e-14	1.27912e-12	3.09088e-13
		13.81	1.32489e-12	1.30507e-13	9.44947e-13	3.21411e-14	1.26839e-12	3.06727e-13
		13.83	1.32463e-12	1.26677e-13	9.40791e-13	3.18072e-14	1.24957e-12	3.07326e-13
		13.85	1.33063e-12	1.28073e-13	9.41091e-13	3.34905e-14	1.2503e-12	3.09279e-13
		13.87	1.32009e-12	1.27754e-13	9.40261e-13	2.74094e-14	1.2428e-12	3.07998e-13
		13.89	1.3154e-12	1.28658e-13	9.40102e-13	2.8734e-14	1.24049e-12	3.08551e-13
		13.91	1.30628e-12	1.30241e-13	9.34392e-13	3.40788e-14	1.2383e-12	3.08016e-13
		13.93	1.3075e-12	1.30439e-13	9.2722e-13	3.50291e-14	1.2337e-12	3.07155e-13
		13.95	1.3101e-12	1.30368e-13	9.31567e-13	3.0543e-14	1.2293e-12	3.06411e-13
		13.97	1.30186e-12	1.28717e-13	9.18748e-13	3.49008e-14	1.23446e-12	3.08318e-13
		13.99	1.29965e-12	1.29136e-13	9.30694e-13	3.07179e-14	1.22878e-12	3.06501e-13
		14.01	1.29932e-12	1.28358e-13	9.17765e-13	3.51607e-14	1.22512e-12	3.0659e-13
		14.03	1.29578e-12	1.30037e-13	9.10138e-13	3.40555e-14	1.21921e-12	3.07687e-13
		14.05	1.29598e-12	1.28108e-13	9.18051e-13	3.39173e-14	1.21785e-12	3.06409e-13
		14.07	1.29476e-12	1.26597e-13	9.09035e-13	3.62783e-14	1.21524e-12	3.05319e-13
		14.09	1.2871e-12	1.25592e-13	9.03303e-13	3.6647e-14	1.21011e-12	3.03117e-13
		14.11	1.2866e-12	1.25943e-13	9.00988e-13	3.7477e-14	1.20952e-12	3.05661e-13
		14.13	1.28169e-12	1.26494e-13	9.06276e-13	3.40839e-14	1.20127e-12	3.05185e-13
		14.15	1.2868e-12	1.26608e-13	9.02205e-13	3.17537e-14	1.19881e-12	3.04449e-13
		14.17	1.27886e-12	1.26112e-13	8.98798e-13	3.52901e-14	1.19618e-12	3.04599e-13
		14.19	1.27392e-12	1.26846e-13	9.0015e-13	3.01632e-14	1.19658e-12	3.0215e-13
		14.21	1.27145e-12	1.27002e-13	8.92692e-13	3.25557e-14	1.18953e-12	3.00883e-13
		14.23
		14.25
		14.27
		14.29	1.59636e-12	1.40615e-13	1.21597e-12	4.20323e-14	1.67795e-12	3.39621e-13
		14.31	1.57873e-12	1.41543e-13	1.2015e-12	4.30299e-14	1.65004e-12	3.41432e-13
		14.33	1.57849e-12	1.41167e-13	1.18375e-12	4.57324e-14	1.63513e-12	3.40051e-13
		14.35	1.58334e-12	1.40043e-13	1.17148e-12	4.32632e-14	1.62243e-12	3.42153e-13
		14.37	1.58347e-12	1.40467e-13	1.17056e-12	4.54551e-14	1.61035e-12	3.43334e-13
		14.39	1.57623e-12	1.40743e-13	1.16285e-12	4.791e-14	1.59423e-12	3.41985e-13
		14.41	1.57956e-12	1.39346e-13	1.16774e-12	4.31962e-14	1.5836e-12	3.41387e-13
		14.43	1.57048e-12	1.40942e-13	1.14963e-12	4.92808e-14	1.56972e-12	3.43065e-13
		14.45	1.56949e-12	1.41132e-13	1.14516e-12	4.70046e-14	1.55604e-12	3.41237e-13
		14.47	1.56771e-12	1.43418e-13	1.14161e-12	4.72201e-14	1.5412e-12	3.42493e-13
		14.49	1.56912e-12	1.40365e-13	1.13949e-12	4.67083e-14	1.53728e-12	3.40334e-13
		14.51	1.55825e-12	1.42932e-13	1.13741e-12	4.51629e-14	1.52555e-12	3.4026e-13
		14.53	1.55279e-12	1.43871e-13	1.13501e-12	4.5261e-14	1.52035e-12	3.37409e-13
		14.55	1.54922e-12	1.43384e-13	1.13833e-12	3.76724e-14	1.50896e-12	3.38822e-13
		14.57	1.54574e-12	1.4522e-13	1.11999e-12	4.42376e-14	1.50755e-12	3.3813e-13
		14.59	1.54248e-12	1.44003e-13	1.11577e-12	4.40798e-14	1.50085e-12	3.4002e-13
		14.61	1.53658e-12	1.44734e-13	1.11271e-12	4.61178e-14	1.48519e-12	3.40735e-13
		14.63	1.53178e-12	1.40995e-13	1.10598e-12	4.66443e-14	1.48236e-12	3.38586e-13
		14.65	1.5303e-12	1.43097e-13	1.10722e-12	4.42559e-14	1.47678e-12	3.38458e-13
		14.67	1.52705e-12	1.42078e-13	1.1068e-12	4.11769e-14	1.47665e-12	3.42184e-13
		14.69	1.52257e-12	1.42406e-13	1.10251e-12	4.25153e-14	1.46771e-12	3.4135e-13
		14.71	1.52117e-12	1.44255e-13	1.09321e-12	4.191e-14	1.45822e-12	3.41825e-13
		14.73	1.51867e-12	1.4532e-13	1.09674e-12	4.05434e-14	1.44763e-12	3.3757e-13
		14.75	1.51689e-12	1.44642e-13	1.08238e-12	4.54813e-14	1.449e-12	3.37939e-13
		14.77	1.52013e-12	1.46833e-13	1.08055e-12	4.15619e-14	1.44449e-12	3.3735e-13
		14.79	1.50995e-12	1.45842e-13	1.07703e-12	4.25371e-14	1.43426e-12	3.35468e-13
		14.81	1.50369e-12	1.41145e-13	1.08245e-12	3.76435e-14	1.43037e-12	3.35473e-13
		14.83	1.49564e-12	1.42891e-13	1.0683e-12	4.01779e-14	1.42609e-12	3.37168e-13
		14.85	1.50047e-12	1.43121e-13	1.06989e-12	3.88838e-14	1.42655e-12	3.33899e-13
		14.87	1.49622e-12	1.41735e-13	1.06711e-12	3.81876e-14	1.4168e-12	3.31162e-13
		14.89	1.48529e-12	1.39371e-13	1.06231e-12	4.10156e-14	1.41309e-12	3.34135e-13
		14.91	1.48505e-12	1.41256e-13	1.05398e-12	4.36292e-14	1.41068e-12	3.37348e-13
		14.93	1.47651e-12	1.41885e-13	1.05565e-12	3.54555e-14	1.4035e-12	3.34991e-13
		14.95	1.48804e-12	1.4179e-13	1.05145e-12	3.6639e-14	1.39982e-12	3.35851e-13
		14.97	1.47411e-12	1.39698e-13	1.04999e-12	3.29731e-14	1.40019e-12	3.3651e-13
		14.99	1.47214e-12	1.39192e-13	1.05125e-12	3.40903e-14	1.39423e-12	3.31281e-13
		15.01	1.46843e-12	1.37947e-13	1.04473e-12	3.29308e-14	1.38674e-12	3.33173e-13
		15.03	1.47018e-12	1.4087e-13	1.03717e-12	3.86381e-14	1.39028e-12	3.27999e-13
		15.05	1.46312e-12	1.39545e-13	1.04038e-12	4.08478e-14	1.37989e-12	3.29247e-13
		15.07	1.46409e-12	1.402e-13	1.04605e-12	3.52938e-14	1.38089e-12	3.29413e-13
		15.09	1.45771e-12	1.38214e-13	1.0327e-12	3.73777e-14	1.38677e-12	3.23566e-13
		15.11	1.4545e-12	1.38127e-13	1.0336e-12	3.61739e-14	1.36791e-12	3.28852e-13
		15.13	1.45086e-12	1.40832e-13	1.01882e-12	3.73141e-14	1.37055e-12	3.28263e-13
		15.15	1.44687e-12	1.37472e-13	1.0225e-12	3.68453e-14	1.36246e-12	3.29934e-13
		15.17	1.44178e-12	1.38731e-13	1.01779e-12	3.77652e-14	1.36524e-12	3.28554e-13
		15.19	1.43882e-12	1.3584e-13	1.00802e-12	3.65582e-14	1.35948e-12	3.26786e-13
		15.21	1.4438e-12	1.36664e-13	1.01655e-12	3.38026e-14	1.35566e-12	3.26383e-13
		15.23
		15.25
		15.27
		15.29	1.74755e-12	1.51412e-13	1.312e-12	4.37443e-14	1.81841e-12	3.54768e-13
		15.31	1.7358e-12	1.51455e-13	1.29177e-12	4.07159e-14	1.79136e-12	3.56702e-13
		15.33	1.73759e-12	1.51511e-13	1.29508e-12	3.84791e-14	1.77855e-12	3.57265e-13
		15.35	1.73219e-12	1.52633e-13	1.27628e-12	4.06017e-14	1.76955e-12	3.57397e-13
		15.37	1.73325e-12	1.52705e-13	1.26653e-12	3.69508e-14	1.7557e-12	3.57609e-13
		15.39	1.73309e-12	1.53123e-13	1.26662e-12	3.66802e-14	1.73496e-12	3.54381e-13
		15.41	1.72597e-12	1.5526e-13	1.25014e-12	4.16158e-14	1.71404e-12	3.57917e-13
		15.43	1.72704e-12	1.53469e-13	1.23619e-12	4.36679e-14	1.69907e-12	3.56189e-13
		15.45	1.71024e-12	1.51141e-13	1.23641e-12	4.06285e-14	1.695e-12	3.5465e-13
		15.47	1.71515e-12	1.5378e-13	1.23994e-12	3.60958e-14	1.68101e-12	3.5154e-13
		15.49	1.7135e-12	1.52248e-13	1.23235e-12	3.93282e-14	1.67973e-12	3.5193e-13
		15.51	1.70891e-12	1.5513e-13	1.2328e-12	3.05423e-14	1.65955e-12	3.46999e-13
		15.53	1.70235e-12	1.5322e-13	1.21888e-12	3.64142e-14	1.6523e-12	3.50463e-13
		15.55	1.6953e-12	1.53953e-13	1.2133e-12	3.58613e-14	1.64584e-12	3.51622e-13
		15.57	1.69042e-12	1.53236e-13	1.22219e-12	3.28418e-14	1.64278e-12	3.51598e-13
		15.59	1.6981e-12	1.53015e-13	1.20507e-12	3.61277e-14	1.63066e-12	3.5383e-13
		15.61	1.68749e-12	1.52036e-13	1.20135e-12	3.29402e-14	1.623e-12	3.53264e-13
		15.63	1.68083e-12	1.52904e-13	1.20634e-12	3.14715e-14	1.60931e-12	3.55728e-13
		15.65	1.68082e-12	1.52926e-13	1.19914e-12	3.07259e-14	1.6132e-12	3.51198e-13
		15.67	1.67513e-12	1.52959e-13	1.19323e-12	3.14001e-14	1.60688e-12	3.51926e-13
		15.69	1.67135e-12	1.52094e-13	1.19204e-12	3.31167e-14	1.589e-12	3.50499e-13
		15.71	1.66909e-12	1.50852e-13	1.1915e-12	2.86909e-14	1.5909e-12	3.50256e-13
		15.73	1.66427e-12	1.50763e-13	1.18881e-12	2.75988e-14	1.57807e-12	3.46247e-13
		15.75	1.6647e-12	1.52472e-13	1.18672e-12	2.70725e-14	1.57672e-12	3.5023e-13
		15.77	1.66002e-12	1.50591e-13	1.18588e-12	3.15727e-14	1.57134e-12	3.48109e-13
		15.79	1.66629e-12	1.5159e-13	1.17141e-12	3.01239e-14	1.56117e-12	3.4819e-13
		15.81	1.64991e-12	1.5182e-13	1.1763e-12	2.76203e-14	1.55471e-12	3.47614e-13
		15.83	1.64861e-12	1.51051e-13	1.17254e-12	2.72437e-14	1.55697e-12	3.46384e-13
		15.85	1.64372e-12	1.51694e-13	1.17625e-12	2.92599e-14	1.54656e-12	3.45585e-13
		15.87	1.64227e-12	1.51402e-13	1.16904e-12	2.80689e-14	1.54279e-12	3.44132e-13
		15.89	1.62971e-12	1.50173e-13	1.16796e-12	3.12192e-14	1.54135e-12	3.45495e-13
		15.91	1.62939e-12	1.49823e-13	1.15704e-12	2.99411e-14	1.53522e-12	3.45166e-13
		15.93	1.62334e-12	1.48455e-13	1.15822e-12	2.0745e-14	1.522e-12	3.43026e-13
		15.95	1.61973e-12	1.47677e-13	1.14766e-12	2.84344e-14	1.52045e-12	3.45732e-13
		15.97	1.61492e-12	1.4831e-13	1.15491e-12	1.94352e-14	1.51135e-12	3.43428e-13
		15.99	1.61668e-12	1.48616e-13	1.14747e-12	2.15233e-14	1.51455e-12	3.43044e-13
		16.01	1.61723e-12	1.48377e-13	1.13703e-12	2.9917e-14	1.5089e-12	3.43406e-13
		16.03	1.61543e-12	1.48735e-13	1.1374e-12	2.41826e-14	1.51127e-12	3.42237e-13
		16.05	1.60655e-12	1.48495e-13	1.13442e-12	2.66484e-14	1.50422e-12	3.42836e-13
		16.07	1.61317e-12	1.47367e-13	1.12832e-12	2.73987e-14	1.49648e-12	3.43397e-13
		16.09	1.60476e-12	1.45497e-13	1.13152e-12	2.27098e-14	1.49402e-12	3.38395e-13
		16.11	1.60224e-12	1.47908e-13	1.12839e-12	2.42652e-14	1.49551e-12	3.37182e-13
		16.13	1.59807e-12	1.48259e-13	1.12368e-12	2.34166e-14	1.48339e-12	3.37124e-13
		16.15	1.59393e-12	1.47009e-13	1.1244e-12	2.45507e-14	1.47865e-12	3.38586e-13
		16.17	1.59157e-12	1.46685e-13	1.11596e-12	2.62193e-14	1.47731e-12	3.37071e-13
		16.19	1.58748e-12	1.46038e-13	1.11306e-12	2.58745e-14	1.48038e-12	3.34347e-13
		16.21	1.58381e-12	1.45947e-13	1.10548e-12	2.48572e-14	1.48055e-12	3.35814e-13
		16.23
		16.25
		16.27
		16.29	1.88228e-12	1.61268e-13	1.41222e-12	3.01309e-14	1.9271e-12	3.6198e-13
		16.31	1.88055e-12	1.62906e-13	1.39872e-12	2.76141e-14	1.89341e-12	3.64256e-13
		16.33	1.87629e-12	1.59257e-13	1.3915e-12	3.09032e-14	1.87706e-12	3.64018e-13
		16.35	1.87448e-12	1.60522e-13	1.37722e-12	3.31901e-14	1.86163e-12	3.64088e-13
		16.37	1.86955e-12	1.57864e-13	1.36806e-12	3.53385e-14	1.85224e-12	3.63845e-13
		16.39	1.86763e-12	1.5819e-13	1.36574e-12	3.38469e-14	1.83737e-12	3.63302e-13
		16.41	1.86565e-12	1.57452e-13	1.35898e-12	3.35188e-14	1.81952e-12	3.63412e-13
		16.43	1.86045e-12	1.5792e-13	1.3533e-12	3.55753e-14	1.81477e-12	3.65826e-13
		16.45	1.85525e-12	1.57752e-13	1.34785e-12	3.18966e-14	1.79695e-12	3.63216e-13
		16.47	1.84829e-12	1.60245e-13	1.33978e-12	3.40595e-14	1.78529e-12	3.64455e-13
		16.49	1.85638e-12	1.59305e-13	1.3365e-12	3.63528e-14	1.76966e-12	3.60969e-13
		16.51	1.84033e-12	1.58148e-13	1.33744e-12	2.90243e-14	1.76071e-12	3.60982e-13
		16.53	1.83924e-12	1.60231e-13	1.33277e-12	3.24922e-14	1.75588e-12	3.58994e-13
		16.55	1.83851e-12	1.60004e-13	1.33117e-12	3.25866e-14	1.75425e-12	3.51857e-13
		16.57	1.82735e-12	1.57952e-13	1.32838e-12	2.64157e-14	1.73289e-12	3.58828e-13
		16.59	1.82835e-12	1.59099e-13	1.32463e-12	3.34785e-14	1.73925e-12	3.50586e-13
		16.61	1.81281e-12	1.56771e-13	1.314e-12	3.49157e-14	1.7219e-12	3.54392e-13
		16.63	1.81469e-12	1.57352e-13	1.3106e-12	3.51258e-14	1.71219e-12	3.56118e-13
		16.65	1.8107e-12	1.57672e-13	1.30719e-12	2.95658e-14	1.70038e-12	3.54424e-13
		16.67	1.81315e-12	1.57684e-13	1.29692e-12	3.2552e-14	1.69355e-12	3.58514e-13
		16.69	1.80309e-12	1.57692e-13	1.30439e-12	2.88737e-14	1.68537e-12	3.55054e-13
		16.71	1.79893e-12	1.56526e-13	1.29804e-12	2.8766e-14	1.67554e-12	3.51696e-13
		16.73	1.79533e-12	1.5707e-13	1.3018e-12	2.66339e-14	1.67516e-12	3.51396e-13
		16.75	1.7891e-12	1.55557e-13	1.28173e-12	3.37752e-14	1.66014e-12	3.50908e-13
		16.77	1.78771e-12	1.54908e-13	1.28984e-12	2.61758e-14	1.66058e-12	3.50829e-13
		16.79	1.78232e-12	1.55036e-13	1.27645e-12	3.41349e-14	1.65706e-12	3.5038e-13
		16.81	1.77776e-12	1.54406e-13	1.27552e-12	3.20923e-14	1.64945e-12	3.4757e-13
		16.83	1.77684e-12	1.5469e-13	1.28122e-12	2.83027e-14	1.64565e-12	3.50006e-13
		16.85	1.77073e-12	1.5354e-13	1.2656e-12	4.05646e-14	1.63782e-12	3.47635e-13
		16.87	1.77052e-12	1.535e-13	1.27181e-12	2.66772e-14	1.6404e-12	3.47271e-13
		16.89	1.76718e-12	1.53812e-13	1.2639e-12	3.248e-14	1.63222e-12	3.48618e-13
		16.91	1.75945e-12	1.53138e-13	1.26472e-12	2.56192e-14	1.61719e-12	3.46627e-13
		16.93	1.75407e-12	1.52029e-13	1.25235e-12	3.46897e-14	1.61651e-12	3.47579e-13
		16.95	1.75168e-12	1.51228e-13	1.25262e-12	3.14512e-14	1.61718e-12	3.43547e-13
		16.97	1.7484e-12	1.51838e-13	1.25002e-12	3.38167e-14	1.61799e-12	3.44551e-13
		16.99	1.73315e-12	1.49569e-13	1.24947e-12	3.09792e-14	1.61221e-12	3.4146e-13
		17.01	1.74108e-12	1.52872e-13	1.24246e-12	3.42593e-14	1.60634e-12	3.42195e-13
		17.03	1.74066e-12	1.52852e-13	1.24112e-12	3.51152e-14	1.59345e-12	3.41245e-13
		17.05	1.72277e-12	1.50344e-13	1.24209e-12	3.13503e-14	1.60412e-12	3.40649e-13
		17.07	1.72253e-12	1.51581e-13	1.23588e-12	3.14546e-14	1.5923e-12	3.42927e-13
		17.09	1.71276e-12	1.50947e-13	1.22806e-12	3.472e-14	1.59008e-12	3.38073e-13
		17.11	1.72221e-12	1.50942e-13	1.22002e-12	3.96997e-14	1.59278e-12	3.36626e-13
		17.13	1.7174e-12	1.48787e-13	1.22894e-12	3.24683e-14	1.57993e-12	3.45403e-13
		17.15	1.71289e-12	1.49001e-13	1.22035e-12	3.33055e-14	1.57714e-12	3.45243e-13
		17.17	1.70482e-12	1.48856e-13	1.22599e-12	2.81996e-14	1.57662e-12	3.44384e-13
		17.19	1.70277e-12	1.4881e-13	1.2223e-12	2.79147e-14	1.5652e-12	3.38024e-13
		17.21	1.7029e-12	1.47466e-13	1.22087e-12	3.0382e-14	1.56347e-12	3.35131e-13
		17.23
		17.25
		17.27
		17.29	1.98397e-12	1.61842e-13	1.51803e-12	3.99164e-14	1.99562e-12	3.6295e-13
		17.31	1.98125e-12	1.64098e-13	1.49136e-12	4.12546e-14	1.97106e-12	3.60871e-13
		17.33	1.9728e-12	1.63161e-13	1.49099e-12	4.34549e-14	1.95626e-12	3.57163e-13
		17.35	1.972e-12	1.63255e-13	1.49341e-12	4.1823e-14	1.94187e-12	3.59605e-13
		17.37	1.96984e-12	1.61968e-13	1.47013e-12	4.47164e-14	1.92831e-12	3.62538e-13
		17.39	1.97467e-12	1.62731e-13	1.4662e-12	4.5463e-14	1.90889e-12	3.60649e-13
		17.41	1.97271e-12	1.62627e-13	1.46694e-12	4.38567e-14	1.88527e-12	3.62405e-13
		17.43	1.96621e-12	1.62042e-13	1.46708e-12	4.46804e-14	1.88301e-12	3.57903e-13
		17.45	1.9536e-12	1.61429e-13	1.46085e-12	4.57688e-14	1.87301e-12	3.58637e-13
		17.47	1.9588e-12	1.61784e-13	1.44519e-12	4.55809e-14	1.87067e-12	3.5436e-13
		17.49	1.94615e-12	1.6016e-13	1.44684e-12	4.59085e-14	1.8548e-12	3.55465e-13
		17.51	1.94668e-12	1.61854e-13	1.44344e-12	4.06689e-14	1.83999e-12	3.51578e-13
		17.53	1.94027e-12	1.61286e-13	1.43504e-12	4.70826e-14	1.84256e-12	3.51987e-13
		17.55	1.93957e-12	1.60511e-13	1.43463e-12	4.83806e-14	1.82457e-12	3.50102e-13
		17.57	1.93585e-12	1.60599e-13	1.43364e-12	4.26636e-14	1.80082e-12	3.55215e-13
		17.59	1.93379e-12	1.60154e-13	1.42512e-12	4.5733e-14	1.79585e-12	3.54829e-13
		17.61	1.92828e-12	1.60864e-13	1.42442e-12	4.9655e-14	1.78354e-12	3.50299e-13
		17.63	1.93332e-12	1.60845e-13	1.42451e-12	4.3588e-14	1.77375e-12	3.49099e-13
		17.65	1.92258e-12	1.59832e-13	1.41821e-12	4.76283e-14	1.76683e-12	3.51358e-13
		17.67	1.92538e-12	1.60104e-13	1.41779e-12	4.2001e-14	1.75452e-12	3.523e-13
		17.69	1.91753e-12	1.60986e-13	1.41869e-12	4.67955e-14	1.75336e-12	3.51114e-13
		17.71	1.91546e-12	1.6027e-13	1.40801e-12	4.61873e-14	1.74736e-12	3.4888e-13
		17.73	1.91353e-12	1.59077e-13	1.40773e-12	4.02864e-14	1.74864e-12	3.47662e-13
		17.75	1.89698e-12	1.57337e-13	1.39893e-12	4.92929e-14	1.7329e-12	3.46669e-13
		17.77	1.89544e-12	1.58651e-13	1.39224e-12	4.72762e-14	1.72714e-12	3.50411e-13
		17.79	1.89141e-12	1.5843e-13	1.38885e-12	4.68367e-14	1.71965e-12	3.46198e-13
		17.81	1.88711e-12	1.56769e-13	1.3929e-12	4.16955e-14	1.7209e-12	3.4631e-13
		17.83	1.88475e-12	1.56642e-13	1.37691e-12	4.68577e-14	1.70898e-12	3.43467e-13
		17.85	1.8812e-12	1.58124e-13	1.37329e-12	4.54093e-14	1.70414e-12	3.46775e-13
		17.87	1.86687e-12	1.55702e-13	1.37509e-12	4.3019e-14	1.6965e-12	3.46562e-13
		17.89	1.86932e-12	1.5692e-13	1.37043e-12	4.25747e-14	1.69189e-12	3.45722e-13
		17.91	1.85806e-12	1.55249e-13	1.36735e-12	4.48257e-14	1.69019e-12	3.44374e-13
		17.93	1.85495e-12	1.54928e-13	1.35801e-12	4.54033e-14	1.68468e-12	3.43432e-13
		17.95	1.84948e-12	1.52591e-13	1.34794e-12	4.53934e-14	1.6772e-12	3.45569e-13
		17.97	1.84498e-12	1.5381e-13	1.35967e-12	4.00373e-14	1.68523e-12	3.41405e-13
		17.99	1.84499e-12	1.53814e-13	1.35094e-12	4.3124e-14	1.68145e-12	3.40411e-13
		18.01	1.8502e-12	1.55097e-13	1.34557e-12	4.22913e-14	1.66915e-12	3.3969e-13
		18.03	1.83963e-12	1.5425e-13	1.34367e-12	4.02977e-14	1.66712e-12	3.38397e-13
		18.05	1.83879e-12	1.53193e-13	1.339e-12	4.08775e-14	1.6571e-12	3.39634e-13
		18.07	1.8279e-12	1.53376e-13	1.34019e-12	3.7475e-14	1.65584e-12	3.36683e-13
		18.09	1.82551e-12	1.5405e-13	1.32604e-12	4.87262e-14	1.65385e-12	3.36899e-13
		18.11	1.82191e-12	1.52664e-13	1.33311e-12	3.87668e-14	1.64879e-12	3.40401e-13
		18.13	1.80914e-12	1.51787e-13	1.32625e-12	4.20452e-14	1.64212e-12	3.358e-13
		18.15	1.81701e-12	1.51699e-13	1.31996e-12	4.50143e-14	1.64146e-12	3.35618e-13
		18.17	1.8109e-12	1.51255e-13	1.32179e-12	3.95351e-14	1.64152e-12	3.32779e-13
		18.19	1.80603e-12	1.52303e-13	1.31946e-12	3.88478e-14	1.63464e-12	3.32409e-13
		18.21	1.79565e-12	1.49276e-13	1.32032e-12	4.05543e-14	1.63185e-12	3.29729e-13
		18.23
		18.25
		18.27
		18.29	2.08619e-12	1.65909e-13	1.60931e-12	4.9312e-14	2.0598e-12	3.59205e-13
		18.31	2.07274e-12	1.67497e-13	1.59784e-12	4.51101e-14	2.02363e-12	3.4998e-13
		18.33	2.07155e-12	1.65543e-13	1.58367e-12	5.04371e-14	2.00193e-12	3.50485e-13
		18.35	2.07313e-12	1.65805e-13	1.56877e-12	5.20747e-14	1.99153e-12	3.45726e-13
		18.37	2.06973e-12	1.64846e-13	1.56591e-12	4.88652e-14	1.97764e-12	3.49564e-13
		18.39	2.07154e-12	1.63845e-13	1.56945e-12	4.57193e-14	1.95531e-12	3.48983e-13
		18.41	2.06439e-12	1.62877e-13	1.55897e-12	4.47121e-14	1.94004e-12	3.47704e-13
		18.43	2.06273e-12	1.63879e-13	1.55578e-12	4.9759e-14	1.92977e-12	3.48293e-13
		18.45	2.05985e-12	1.65198e-13	1.55603e-12	4.37777e-14	1.92012e-12	3.45407e-13
		18.47	2.05347e-12	1.65969e-13	1.54271e-12	4.99214e-14	1.90333e-12	3.46995e-13
		18.49	2.05065e-12	1.63412e-13	1.53525e-12	4.74975e-14	1.89425e-12	3.44042e-13
		18.51	2.04226e-12	1.63931e-13	1.53556e-12	4.65935e-14	1.88125e-12	3.44031e-13
		18.53	2.04567e-12	1.63815e-13	1.52093e-12	5.22406e-14	1.8718e-12	3.44203e-13
		18.55	2.03235e-12	1.63053e-13	1.51929e-12	5.29535e-14	1.85979e-12	3.50265e-13
		18.57	2.03085e-12	1.62759e-13	1.51451e-12	5.42188e-14	1.85172e-12	3.47733e-13
		18.59	2.02833e-12	1.63485e-13	1.52399e-12	4.79047e-14	1.8402e-12	3.47574e-13
		18.61	2.02415e-12	1.63615e-13	1.51709e-12	4.76275e-14	1.82999e-12	3.47992e-13
		18.63	2.0316e-12	1.6467e-13	1.50473e-12	5.18318e-14	1.82507e-12	3.50219e-13
		18.65	2.01834e-12	1.63084e-13	1.50797e-12	4.80358e-14	1.81964e-12	3.47765e-13
		18.67	2.01068e-12	1.62188e-13	1.49855e-12	5.11857e-14	1.81008e-12	3.47766e-13
		18.69	2.00812e-12	1.61637e-13	1.49795e-12	5.13046e-14	1.8029e-12	3.46784e-13
		18.71	2.00381e-12	1.60844e-13	1.49533e-12	5.16048e-14	1.79295e-12	3.43818e-13
		18.73	1.99698e-12	1.59727e-13	1.49053e-12	4.89093e-14	1.78668e-12	3.43929e-13
		18.75	1.99893e-12	1.61742e-13	1.48941e-12	4.87493e-14	1.77789e-12	3.45671e-13
		18.77	1.98879e-12	1.59744e-13	1.48716e-12	5.01006e-14	1.76956e-12	3.44661e-13
		18.79	1.9799e-12	1.59371e-13	1.46929e-12	5.14694e-14	1.76275e-12	3.42227e-13
		18.81	1.98172e-12	1.61414e-13	1.48068e-12	4.70231e-14	1.75845e-12	3.3939e-13
		18.83	1.97627e-12	1.57029e-13	1.47163e-12	4.98391e-14	1.7543e-12	3.40121e-13
		18.85	1.96521e-12	1.57563e-13	1.47213e-12	5.16245e-14	1.74861e-12	3.36904e-13
		18.87	1.96468e-12	1.57295e-13	1.45237e-12	5.58249e-14	1.74335e-12	3.39318e-13
		18.89	1.96513e-12	1.57512e-13	1.4513e-12	5.66842e-14	1.74291e-12	3.36672e-13
		18.91	1.95713e-12	1.57716e-13	1.44962e-12	5.1926e-14	1.73091e-12	3.37106e-13
		18.93	1.95499e-12	1.56269e-13	1.45049e-12	5.24392e-14	1.72543e-12	3.36483e-13
		18.95	1.95388e-12	1.55365e-13	1.44882e-12	5.06478e-14	1.72283e-12	3.3608e-13
		18.97	1.95007e-12	1.56753e-13	1.44566e-12	5.33113e-14	1.72642e-12	3.30565e-13
		18.99	1.94397e-12	1.56317e-13	1.43686e-12	5.38422e-14	1.71344e-12	3.32406e-13
		19.01	1.93732e-12	1.55427e-13	1.43589e-12	5.248e-14	1.70683e-12	3.34633e-13
		19.03	1.93755e-12	1.54904e-13	1.43528e-12	5.07153e-14	1.70553e-12	3.3272e-13
		19.05	1.93194e-12	1.54881e-13	1.43192e-12	5.33433e-14	1.70105e-12	3.33043e-13
		19.07	1.92277e-12	1.52317e-13	1.42285e-12	5.43507e-14	1.69683e-12	3.34463e-13
		19.09	1.91845e-12	1.53932e-13	1.42749e-12	5.47222e-14	1.69479e-12	3.32199e-13
		19.11	1.91142e-12	1.52827e-13	1.41641e-12	5.79816e-14	1.68602e-12	3.30395e-13
		19.13	1.91368e-12	1.54052e-13	1.42002e-12	5.39169e-14	1.6844e-12	3.29134e-13
		19.15	1.91029e-12	1.52191e-13	1.40344e-12	6.0363e-14	1.6795e-12	3.2536e-13
		19.17	1.90755e-12	1.51892e-13	1.4148e-12	5.33632e-14	1.67649e-12	3.27172e-13
		19.19	1.89577e-12	1.51517e-13	1.40959e-12	5.7333e-14	1.67187e-12	3.28421e-13
		19.21	1.89022e-12	1.50733e-13	1.40978e-12	5.73357e-14	1.6684e-12	3.25524e-13
		19.23
		19.25
		19.27
		19.29	2.17769e-12	1.67565e-13	1.70268e-12	6.87273e-14	2.08255e-12	3.45629e-13
		19.31	2.15595e-12	1.64956e-13	1.6771e-12	6.67401e-14	2.05336e-12	3.43114e-13
		19.33	2.16113e-12	1.67556e-13	1.67464e-12	7.02349e-14	2.03992e-12	3.42355e-13
		19.35	2.16384e-12	1.66984e-13	1.65458e-12	7.28006e-14	2.02679e-12	3.43355e-13
		19.37	2.15507e-12	1.67439e-13	1.66266e-12	6.63118e-14	2.01027e-12	3.41852e-13
		19.39	2.15347e-12	1.64593e-13	1.6587e-12	7.08987e-14	1.99908e-12	3.40908e-13
		19.41	2.15338e-12	1.6588e-13	1.64975e-12	6.76721e-14	1.98093e-12	3.43594e-13
		19.43	2.1547e-12	1.67104e-13	1.64787e-12	6.95793e-14	1.97091e-12	3.40774e-13
		19.45	2.1461e-12	1.65575e-13	1.64084e-12	7.09372e-14	1.95379e-12	3.40293e-13
		19.47	2.13887e-12	1.64216e-13	1.6304e-12	6.94135e-14	1.94056e-12	3.40619e-13
		19.49	2.12963e-12	1.64007e-13	1.62511e-12	7.03484e-14	1.93428e-12	3.38631e-13
		19.51	2.12692e-12	1.61934e-13	1.62129e-12	7.08234e-14	1.92088e-12	3.41545e-13
		19.53	2.1243e-12	1.6093e-13	1.61348e-12	7.00175e-14	1.92029e-12	3.41682e-13
		19.55	2.11583e-12	1.60589e-13	1.61197e-12	6.54056e-14	1.90577e-12	3.40216e-13
		19.57	2.11154e-12	1.61622e-13	1.59888e-12	6.93077e-14	1.8896e-12	3.36977e-13
		19.59	2.11237e-12	1.63449e-13	1.6e-12	6.38291e-14	1.88027e-12	3.36337e-13
		19.61	2.10331e-12	1.59243e-13	1.59471e-12	6.43466e-14	1.87234e-12	3.38346e-13
		19.63	2.10009e-12	1.6055e-13	1.58825e-12	6.70901e-14	1.86711e-12	3.36941e-13
		19.65	2.09328e-12	1.61064e-13	1.58248e-12	6.85617e-14	1.85528e-12	3.36387e-13
		19.67	2.09039e-12	1.59422e-13	1.58414e-12	6.07633e-14	1.85699e-12	3.38157e-13
		19.69	2.08782e-12	1.58903e-13	1.57728e-12	6.42137e-14	1.84697e-12	3.36107e-13
		19.71	2.08071e-12	1.6002e-13	1.56318e-12	6.92742e-14	1.8346e-12	3.35672e-13
		19.73	2.07312e-12	1.5856e-13	1.56651e-12	6.73767e-14	1.8316e-12	3.35564e-13
		19.75	2.07833e-12	1.59916e-13	1.5638e-12	6.16215e-14	1.82521e-12	3.34251e-13
		19.77	2.0699e-12	1.5919e-13	1.56164e-12	6.67722e-14	1.81711e-12	3.32944e-13
		19.79	2.06228e-12	1.58414e-13	1.5498e-12	6.84094e-14	1.81042e-12	3.33414e-13
		19.81	2.05408e-12	1.56895e-13	1.55484e-12	6.333e-14	1.8029e-12	3.32434e-13
		19.83	2.05115e-12	1.58804e-13	1.56109e-12	6.09982e-14	1.79863e-12	3.27221e-13
		19.85	2.04798e-12	1.57242e-13	1.55689e-12	5.86405e-14	1.79555e-12	3.29478e-13
		19.87	2.04629e-12	1.58181e-13	1.54573e-12	6.68719e-14	1.7878e-12	3.29577e-13
		19.89	2.04114e-12	1.5696e-13	1.54151e-12	6.75921e-14	1.78621e-12	3.28496e-13
		19.91	2.04021e-12	1.57825e-13	1.54467e-12	6.26334e-14	1.77954e-12	3.29759e-13
		19.93	2.03422e-12	1.57401e-13	1.54797e-12	6.11602e-14	1.77227e-12	3.26322e-13
		19.95	2.02163e-12	1.54553e-13	1.53108e-12	6.38149e-14	1.76758e-12	3.23336e-13
		19.97	2.02336e-12	1.55835e-13	1.53002e-12	6.68982e-14	1.75946e-12	3.2173e-13
		19.99	2.01678e-12	1.54794e-13	1.51998e-12	7.03662e-14	1.76155e-12	3.20464e-13
		20.01	2.01343e-12	1.53772e-13	1.52692e-12	6.73806e-14	1.74786e-12	3.20477e-13
		20.03	2.00801e-12	1.52361e-13	1.51717e-12	7.02111e-14	1.75191e-12	3.19568e-13
		20.05	2.00574e-12	1.52915e-13	1.51595e-12	6.34291e-14	1.74436e-12	3.18708e-13
		20.07	2.00101e-12	1.54595e-13	1.50696e-12	6.74002e-14	1.73945e-12	3.17739e-13
		20.09	1.992e-12	1.52324e-13	1.50957e-12	6.67779e-14	1.73686e-12	3.14572e-13
		20.11	1.97797e-12	1.51692e-13	1.50524e-12	6.52729e-14	1.73518e-12	3.15446e-13
		20.13	1.97392e-12	1.51364e-13	1.50358e-12	6.60828e-14	1.73152e-12	3.16305e-13
		20.15	1.97275e-12	1.51108e-13	1.50276e-12	6.702e-14	1.72652e-12	3.134e-13
		20.17	1.96978e-12	1.50531e-13	1.50064e-12	6.37657e-14	1.72465e-12	3.14229e-13
		20.19	1.96482e-12	1.509e-13	1.49941e-12	6.19834e-14	1.72008e-12	3.11996e-13
		20.21	1.96406e-12	1.51145e-13	1.48547e-12	6.54069e-14	1.71102e-12	3.1168e-13
		20.23
		20.25
		20.27
		20.29	2.24762e-12	1.68405e-13	1.7725e-12	7.72738e-14	2.13067e-12	3.32308e-13
		20.31	2.23507e-12	1.66636e-13	1.75847e-12	7.25124e-14	2.09773e-12	3.29825e-13
		20.33	2.2319e-12	1.66607e-13	1.74541e-12	7.7626e-14	2.07954e-12	3.2922e-13
		20.35	2.23389e-12	1.68207e-13	1.73497e-12	7.848e-14	2.06755e-12	3.31082e-13
		20.37	2.23342e-12	1.67261e-13	1.73179e-12	7.83926e-14	2.04951e-12	3.27747e-13
		20.39	2.2252e-12	1.63731e-13	1.72422e-12	8.01115e-14	2.03669e-12	3.29199e-13
		20.41	2.22695e-12	1.66082e-13	1.71262e-12	8.28668e-14	2.01898e-12	3.27826e-13
		20.43	2.21886e-12	1.66573e-13	1.71184e-12	7.69119e-14	2.01348e-12	3.28146e-13
		20.45	2.2143e-12	1.63087e-13	1.71191e-12	7.57106e-14	1.99712e-12	3.26002e-13
		20.47	2.2068e-12	1.64734e-13	1.70074e-12	8.05896e-14	1.99014e-12	3.26444e-13
		20.49	2.21382e-12	1.66283e-13	1.69643e-12	7.77899e-14	1.97837e-12	3.25349e-13
		20.51	2.20548e-12	1.66623e-13	1.69453e-12	7.29862e-14	1.96925e-12	3.25808e-13
		20.53	2.20415e-12	1.64951e-13	1.68338e-12	7.95206e-14	1.95452e-12	3.20369e-13
		20.55	2.20502e-12	1.64647e-13	1.67778e-12	7.98577e-14	1.95058e-12	3.23467e-13
		20.57	2.19317e-12	1.64834e-13	1.69062e-12	7.18733e-14	1.93725e-12	3.21082e-13
		20.59	2.18735e-12	1.64071e-13	1.67943e-12	7.38993e-14	1.92865e-12	3.21469e-13
		20.61	2.17135e-12	1.61281e-13	1.66914e-12	7.71857e-14	1.91854e-12	3.21448e-13
		20.63	2.18089e-12	1.63048e-13	1.66716e-12	7.59073e-14	1.91664e-12	3.20956e-13
		20.65	2.16741e-12	1.60812e-13	1.66228e-12	7.53875e-14	1.90538e-12	3.20094e-13
		20.67	2.1665e-12	1.61944e-13	1.64894e-12	8.03911e-14	1.90456e-12	3.19095e-13
		20.69	2.15005e-12	1.6166e-13	1.65183e-12	7.63162e-14	1.89738e-12	3.15819e-13
		20.71	2.15428e-12	1.61576e-13	1.65919e-12	6.90812e-14	1.89209e-12	3.18916e-13
		20.73	2.14406e-12	1.6105e-13	1.64343e-12	7.5454e-14	1.89047e-12	3.15479e-13
		20.75	2.14574e-12	1.59953e-13	1.64146e-12	7.36865e-14	1.87588e-12	3.1514e-13
		20.77	2.14212e-12	1.61442e-13	1.6369e-12	7.62317e-14	1.87107e-12	3.13691e-13
		20.79	2.1377e-12	1.59093e-13	1.63636e-12	7.1773e-14	1.87e-12	3.1616e-13
		20.81	2.13702e-12	1.62959e-13	1.62469e-12	7.54956e-14	1.85898e-12	3.14418e-13
		20.83	2.13881e-12	1.61679e-13	1.61675e-12	7.32639e-14	1.85202e-12	3.13358e-13
		20.85	2.12771e-12	1.60894e-13	1.61626e-12	7.07521e-14	1.84881e-12	3.13151e-13
		20.87	2.11867e-12	1.58428e-13	1.60661e-12	7.92054e-14	1.84469e-12	3.12561e-13
		20.89	2.1173e-12	1.58971e-13	1.60323e-12	7.70147e-14	1.83954e-12	3.13158e-13
		20.91	2.1131e-12	1.58304e-13	1.60613e-12	7.68689e-14	1.83561e-12	3.12644e-13
		20.93	2.10506e-12	1.57177e-13	1.59877e-12	7.57175e-14	1.83231e-12	3.11529e-13
		20.95	2.09366e-12	1.55518e-13	1.59796e-12	7.54726e-14	1.82975e-12	3.08006e-13
		20.97	2.09206e-12	1.55066e-13	1.59123e-12	7.78235e-14	1.82427e-12	3.11525e-13
		20.99	2.08954e-12	1.54974e-13	1.58599e-12	7.80833e-14	1.82002e-12	3.05898e-13
		21.01	2.0852e-12	1.53701e-13	1.58126e-12	7.76978e-14	1.81713e-12	3.0563e-13
		21.03	2.08176e-12	1.54047e-13	1.57737e-12	7.55064e-14	1.81311e-12	3.0419e-13
		21.05	2.07325e-12	1.54211e-13	1.57959e-12	7.16945e-14	1.80882e-12	3.07328e-13
		21.07	2.07121e-12	1.53201e-13	1.57417e-12	7.2751e-14	1.80041e-12	3.03709e-13
		21.09	2.07442e-12	1.532e-13	1.55941e-12	7.98683e-14	1.79967e-12	3.05565e-13
		21.11	2.06149e-12	1.52421e-13	1.56212e-12	7.39083e-14	1.79989e-12	3.03348e-13
		21.13	2.05369e-12	1.52517e-13	1.55919e-12	7.3914e-14	1.79152e-12	3.02028e-13
		21.15	2.05344e-12	1.54132e-13	1.56105e-12	7.4893e-14	1.79067e-12	3.0039e-13
		21.17	2.05044e-12	1.51804e-13	1.56258e-12	6.78054e-14	1.78835e-12	3.01754e-13
		21.19	2.04842e-12	1.52795e-13	1.54918e-12	7.40681e-14	1.78396e-12	2.99519e-13
		21.21	2.048e-12	1.51072e-13	1.54913e-12	7.37482e-14	1.77896e-12	3.03113e-13
		21.23
		21.25
		21.27
		21.29	2.32155e-12	1.68197e-13	1.84224e-12	8.11721e-14	2.19277e-12	3.25886e-13
		21.31	2.31259e-12	1.68301e-13	1.8189e-12	8.05191e-14	2.1621e-12	3.24051e-13
		21.33	2.31288e-12	1.68022e-13	1.81518e-12	7.62772e-14	2.14684e-12	3.2304e-13
		21.35	2.30359e-12	1.64872e-13	1.80305e-12	8.1956e-14	2.12996e-12	3.20569e-13
		21.37	2.30059e-12	1.65701e-13	1.78285e-12	8.83877e-14	2.112e-12	3.20748e-13
		21.39	2.30281e-12	1.65554e-13	1.78085e-12	8.49833e-14	2.10019e-12	3.2135e-13
		21.41	2.29544e-12	1.64777e-13	1.77772e-12	8.20391e-14	2.08516e-12	3.20108e-13
		21.43	2.29015e-12	1.6542e-13	1.77512e-12	8.08497e-14	2.07294e-12	3.20374e-13
		21.45	2.28525e-12	1.62403e-13	1.76107e-12	8.41258e-14	2.06613e-12	3.20534e-13
		21.47	2.2757e-12	1.61961e-13	1.75036e-12	8.80368e-14	2.0525e-12	3.18407e-13
		21.49	2.26941e-12	1.62663e-13	1.75755e-12	8.3044e-14	2.03721e-12	3.18499e-13
		21.51	2.26834e-12	1.64091e-13	1.75018e-12	7.93007e-14	2.03119e-12	3.18849e-13
		21.53	2.26271e-12	1.6151e-13	1.74298e-12	8.00001e-14	2.02711e-12	3.1769e-13
		21.55	2.25851e-12	1.60515e-13	1.74809e-12	7.86144e-14	2.01119e-12	3.17931e-13
		21.57	2.25197e-12	1.60171e-13	1.73925e-12	7.53407e-14	2.00082e-12	3.16742e-13
		21.59	2.25063e-12	1.61102e-13	1.73854e-12	7.71611e-14	1.9932e-12	3.18259e-13
		21.61	2.24182e-12	1.60402e-13	1.72936e-12	7.82972e-14	1.98629e-12	3.1532e-13
		21.63	2.2428e-12	1.61383e-13	1.7213e-12	7.9219e-14	1.97494e-12	3.15773e-13
		21.65	2.23821e-12	1.60193e-13	1.71731e-12	7.6341e-14	1.97087e-12	3.15881e-13
		21.67	2.22662e-12	1.58452e-13	1.71049e-12	7.95685e-14	1.96711e-12	3.17388e-13
		21.69	2.22347e-12	1.59032e-13	1.70539e-12	7.93871e-14	1.95685e-12	3.13667e-13
		21.71	2.22075e-12	1.60579e-13	1.7009e-12	7.75759e-14	1.9499e-12	3.13219e-13
		21.73	2.2092e-12	1.56924e-13	1.69917e-12	7.56189e-14	1.93939e-12	3.13615e-13
		21.75	2.21069e-12	1.55831e-13	1.6946e-12	7.57283e-14	1.93494e-12	3.12937e-13
		21.77	2.20202e-12	1.56761e-13	1.70274e-12	7.36753e-14	1.92875e-12	3.12007e-13
		21.79	2.19547e-12	1.56157e-13	1.6807e-12	8.15319e-14	1.92006e-12	3.08703e-13
		21.81	2.19594e-12	1.55534e-13	1.68077e-12	7.63423e-14	1.92e-12	3.10217e-13
		21.83	2.19105e-12	1.55755e-13	1.67552e-12	7.12242e-14	1.9106e-12	3.0795e-13
		21.85	2.18724e-12	1.55561e-13	1.67672e-12	7.58684e-14	1.90778e-12	3.07154e-13
		21.87	2.17954e-12	1.56105e-13	1.67272e-12	7.70908e-14	1.90302e-12	3.07576e-13
		21.89	2.17716e-12	1.54085e-13	1.66503e-12	7.23105e-14	1.90009e-12	3.07137e-13
		21.91	2.1804e-12	1.55808e-13	1.65922e-12	7.15069e-14	1.88775e-12	3.06258e-13
		21.93	2.17858e-12	1.5363e-13	1.64188e-12	7.83395e-14	1.88429e-12	3.03579e-13
		21.95	2.17101e-12	1.5477e-13	1.64784e-12	6.95456e-14	1.88306e-12	3.03414e-13
		21.97	2.1653e-12	1.52184e-13	1.6452e-12	7.38696e-14	1.87088e-12	3.04932e-13
		21.99	2.15652e-12	1.52147e-13	1.6293e-12	7.95801e-14	1.86786e-12	3.04779e-13
		22.01	2.14999e-12	1.51803e-13	1.63226e-12	7.50757e-14	1.86093e-12	3.04598e-13
		22.03	2.14615e-12	1.52436e-13	1.63451e-12	7.0414e-14	1.85917e-12	3.02032e-13
		22.05	2.15e-12	1.52286e-13	1.62046e-12	7.59006e-14	1.85363e-12	3.02512e-13
		22.07	2.13905e-12	1.49984e-13	1.62385e-12	7.17824e-14	1.84665e-12	3.01032e-13
		22.09	2.13195e-12	1.49361e-13	1.61815e-12	7.13651e-14	1.85073e-12	3.05196e-13
		22.11	2.12641e-12	1.50072e-13	1.60382e-12	7.78723e-14	1.84261e-12	3.01155e-13
		22.13	2.12155e-12	1.49761e-13	1.6033e-12	7.65399e-14	1.84137e-12	3.00125e-13
		22.15	2.11445e-12	1.4854e-13	1.61414e-12	7.06195e-14	1.8375e-12	3.00795e-13
		22.17	2.10763e-12	1.47491e-13	1.59225e-12	7.78767e-14	1.83021e-12	3.00298e-13
		22.19	2.10424e-12	1.489e-13	1.59509e-12	7.73831e-14	1.82488e-12	2.98545e-13
		22.21	2.10484e-12	1.46917e-13	1.58744e-12	7.38234e-14	1.82073e-12	2.97787e-13
		22.23
		22.25
		22.27
		22.29	2.3771e-12	1.65207e-13	1.87673e-12	8.5906e-14	2.23511e-12	3.21541e-13
		22.31	2.37291e-12	1.67951e-13	1.85537e-12	8.59896e-14	2.20193e-12	3.19772e-13
		22.33	2.36313e-12	1.64376e-13	1.85496e-12	8.70424e-14	2.18542e-12	3.1998e-13
		22.35	2.37128e-12	1.66445e-13	1.84518e-12	9.31761e-14	2.17593e-12	3.20732e-13
		22.37	2.36669e-12	1.65008e-13	1.83782e-12	8.69398e-14	2.15683e-12	3.19849e-13
		22.39	2.36132e-12	1.65593e-13	1.83066e-12	8.87647e-14	2.14085e-12	3.17862e-13
		22.41	2.35408e-12	1.64098e-13	1.83054e-12	8.38668e-14	2.12559e-12	3.18019e-13
		22.43	2.35583e-12	1.64824e-13	1.82436e-12	8.66025e-14	2.10933e-12	3.18116e-13
		22.45	2.35153e-12	1.65237e-13	1.81556e-12	9.0632e-14	2.0997e-12	3.16653e-13
		22.47	2.34295e-12	1.62418e-13	1.81371e-12	8.87632e-14	2.08395e-12	3.14975e-13
		22.49	2.33628e-12	1.62607e-13	1.81068e-12	9.01517e-14	2.07714e-12	3.14337e-13
		22.51	2.33033e-12	1.61827e-13	1.80073e-12	8.82962e-14	2.06504e-12	3.11083e-13
		22.53	2.31799e-12	1.61301e-13	1.80218e-12	9.07159e-14	2.06204e-12	3.11936e-13
		22.55	2.30875e-12	1.61238e-13	1.79715e-12	9.00051e-14	2.04584e-12	3.12488e-13
		22.57	2.30076e-12	1.60357e-13	1.79909e-12	8.52783e-14	2.04253e-12	3.11385e-13
		22.59	2.29681e-12	1.61037e-13	1.80145e-12	8.36372e-14	2.02985e-12	3.09321e-13
		22.61	2.29402e-12	1.58638e-13	1.79751e-12	8.36107e-14	2.01948e-12	3.13109e-13
		22.63	2.28839e-12	1.58195e-13	1.79549e-12	8.41163e-14	2.0051e-12	3.10069e-13
		22.65	2.29095e-12	1.58509e-13	1.78722e-12	8.12166e-14	2.00355e-12	3.11618e-13
		22.67	2.28279e-12	1.58168e-13	1.79122e-12	8.02715e-14	1.99262e-12	3.13495e-13
		22.69	2.29167e-12	1.60134e-13	1.78343e-12	7.99821e-14	1.98571e-12	3.11971e-13
		22.71	2.2847e-12	1.58993e-13	1.7722e-12	8.10823e-14	1.97892e-12	3.06899e-13
		22.73	2.27519e-12	1.59617e-13	1.77092e-12	7.99586e-14	1.96842e-12	3.08106e-13
		22.75	2.27154e-12	1.59487e-13	1.76203e-12	8.25205e-14	1.96251e-12	3.04849e-13
		22.77	2.26431e-12	1.57288e-13	1.7641e-12	7.95125e-14	1.95858e-12	3.07437e-13
		22.79	2.26834e-12	1.58886e-13	1.75654e-12	8.22896e-14	1.94732e-12	3.06075e-13
		22.81	2.26552e-12	1.57866e-13	1.75596e-12	7.91498e-14	1.94999e-12	3.07284e-13
		22.83	2.25416e-12	1.57554e-13	1.75838e-12	7.57876e-14	1.94338e-12	3.05002e-13
		22.85	2.25365e-12	1.57579e-13	1.73548e-12	8.48309e-14	1.94147e-12	3.04917e-13
		22.87	2.23182e-12	1.55605e-13	1.74202e-12	7.64473e-14	1.94094e-12	3.06463e-13
		22.89	2.22874e-12	1.55064e-13	1.73703e-12	7.9015e-14	1.9276e-12	3.03648e-13
		22.91	2.22591e-12	1.53958e-13	1.73419e-12	7.82972e-14	1.92637e-12	3.05667e-13
		22.93	2.22549e-12	1.55694e-13	1.72974e-12	7.78638e-14	1.91701e-12	3.01975e-13
		22.95	2.2203e-12	1.55075e-13	1.71213e-12	8.33684e-14	1.91695e-12	3.02128e-13
		22.97	2.21826e-12	1.55155e-13	1.7131e-12	8.11337e-14	1.90596e-12	3.00121e-13
		22.99	2.20268e-12	1.53194e-13	1.70985e-12	7.7371e-14	1.90358e-12	3.0177e-13
		23.01	2.20272e-12	1.53053e-13	1.70347e-12	8.05591e-14	1.90218e-12	2.9925e-13
		23.03	2.20503e-12	1.53701e-13	1.69824e-12	7.77192e-14	1.89588e-12	2.96665e-13
		23.05	2.19359e-12	1.52165e-13	1.70314e-12	7.91386e-14	1.8924e-12	2.99607e-13
		23.07	2.19031e-12	1.52402e-13	1.69805e-12	7.62454e-14	1.88975e-12	2.99359e-13
		23.09	2.18801e-12	1.52165e-13	1.70096e-12	7.60094e-14	1.88161e-12	2.94963e-13
		23.11	2.18495e-12	1.50924e-13	1.69676e-12	7.54256e-14	1.87661e-12	2.98169e-13
		23.13	2.18061e-12	1.51013e-13	1.68348e-12	7.78827e-14	1.87766e-12	2.9456e-13
		23.15	2.17366e-12	1.49654e-13	1.69176e-12	7.17649e-14	1.86935e-12	2.96421e-13
		23.17	2.17321e-12	1.5015e-13	1.68297e-12	7.52399e-14	1.867e-12	2.93713e-13
		23.19	2.15703e-12	1.48168e-13	1.68258e-12	7.3967e-14	1.86512e-12	2.93877e-13
		23.21	2.16212e-12	1.4942e-13	1.6813e-12	7.47332e-14	1.85899e-12	2.91533e-13
		23.23
		23.25
		23.27
		23.29	2.44162e-12	1.65844e-13	1.95594e-12	8.66784e-14	2.26119e-12	3.18005e-13
		23.31	2.42646e-12	1.66443e-13	1.94166e-12	8.87714e-14	2.23635e-12	3.14364e-13
		23.33	2.43567e-12	1.67986e-13	1.93028e-12	8.56928e-14	2.21845e-12	3.14222e-13
		23.35	2.43091e-12	1.67217e-13	1.92576e-12	8.95348e-14	2.19986e-12	3.14373e-13
		23.37	2.42847e-12	1.67452e-13	1.90879e-12	9.21117e-14	2.19148e-12	3.12372e-13
		23.39	2.42024e-12	1.63961e-13	1.90933e-12	9.1433e-14	2.17384e-12	3.13166e-13
		23.41	2.42262e-12	1.64737e-13	1.90455e-12	8.81543e-14	2.15811e-12	3.12583e-13
		23.43	2.41601e-12	1.64521e-13	1.90039e-12	8.55959e-14	2.14908e-12	3.11297e-13
		23.45	2.41547e-12	1.67113e-13	1.89253e-12	8.26937e-14	2.13421e-12	3.13858e-13
		23.47	2.40296e-12	1.64756e-13	1.88824e-12	8.75233e-14	2.12282e-12	3.11084e-13
		23.49	2.408e-12	1.6582e-13	1.881e-12	8.82677e-14	2.1131e-12	3.09621e-13
		23.51	2.40439e-12	1.65989e-13	1.88351e-12	8.42728e-14	2.10135e-12	3.1071e-13
		23.53	2.38979e-12	1.65624e-13	1.88049e-12	8.56768e-14	2.09175e-12	3.06713e-13
		23.55	2.39114e-12	1.63508e-13	1.86801e-12	8.52073e-14	2.07989e-12	3.07138e-13
		23.57	2.38977e-12	1.64373e-13	1.8696e-12	8.76366e-14	2.07293e-12	3.08195e-13
		23.59	2.38139e-12	1.62182e-13	1.85445e-12	8.65949e-14	2.06639e-12	3.09485e-13
		23.61	2.37538e-12	1.61216e-13	1.85509e-12	8.59349e-14	2.05425e-12	3.06527e-13
		23.63	2.38908e-12	1.64783e-13	1.85033e-12	8.14983e-14	2.0494e-12	3.0412e-13
		23.65	2.36737e-12	1.63325e-13	1.84535e-12	8.78821e-14	2.03538e-12	3.05701e-13
		23.67	2.36367e-12	1.61684e-13	1.84309e-12	8.74079e-14	2.0326e-12	3.02764e-13
		23.69	2.36072e-12	1.63704e-13	1.84065e-12	8.64761e-14	2.02415e-12	3.03038e-13
		23.71	2.36155e-12	1.65003e-13	1.83101e-12	8.37548e-14	2.01645e-12	3.01086e-13
		23.73	2.3485e-12	1.60249e-13	1.83268e-12	8.47084e-14	2.01188e-12	3.0088e-13
		23.75	2.33785e-12	1.59876e-13	1.82204e-12	8.57444e-14	2.00198e-12	2.99293e-13
		23.77	2.3417e-12	1.61251e-13	1.82039e-12	8.7141e-14	2.00156e-12	3.00433e-13
		23.79	2.32725e-12	1.59943e-13	1.82077e-12	8.26666e-14	1.99027e-12	3.01414e-13
		23.81	2.32731e-12	1.58757e-13	1.81747e-12	8.36538e-14	1.98371e-12	2.99097e-13
		23.83	2.31985e-12	1.59684e-13	1.80953e-12	8.39845e-14	1.98336e-12	2.97609e-13
		23.85	2.30985e-12	1.5801e-13	1.80645e-12	8.23315e-14	1.97287e-12	2.98718e-13
		23.87	2.30002e-12	1.54805e-13	1.79653e-12	8.26378e-14	1.96853e-12	2.97203e-13
		23.89	2.30373e-12	1.56438e-13	1.78915e-12	8.09789e-14	1.96533e-12	2.95639e-13
		23.91	2.29517e-12	1.53442e-13	1.78576e-12	8.06047e-14	1.95348e-12	2.95537e-13
		23.93	2.2907e-12	1.54367e-13	1.78337e-12	8.43189e-14	1.9515e-12	2.95178e-13
		23.95	2.28614e-12	1.55345e-13	1.78043e-12	8.14541e-14	1.95123e-12	2.93727e-13
		23.97	2.27716e-12	1.53694e-13	1.77251e-12	8.55122e-14	1.95244e-12	2.96975e-13
		23.99	2.26814e-12	1.53834e-13	1.77516e-12	8.10593e-14	1.93738e-12	2.95236e-13
		24.01	2.26741e-12	1.52409e-13	1.77996e-12	7.71927e-14	1.93525e-12	2.92639e-13
		24.03	2.26597e-12	1.52162e-13	1.76332e-12	7.8884e-14	1.93094e-12	2.92918e-13
		24.05	2.25582e-12	1.51572e-13	1.76215e-12	8.1267e-14	1.92606e-12	2.9283e-13
		24.07	2.25331e-12	1.51738e-13	1.76061e-12	8.05755e-14	1.92607e-12	2.93677e-13
		24.09	2.2499e-12	1.5236e-13	1.75339e-12	7.89026e-14	1.92499e-12	2.90313e-13
		24.11	2.24264e-12	1.5135e-13	1.75275e-12	7.82965e-14	1.91696e-12	2.92179e-13
		24.13	2.24277e-12	1.50505e-13	1.74154e-12	8.19274e-14	1.91135e-12	2.91769e-13
		24.15	2.23388e-12	1.5024e-13	1.7418e-12	8.06262e-14	1.912e-12	2.9126e-13
		24.17	2.2291e-12	1.51605e-13	1.73753e-12	8.21488e-14	1.90511e-12	2.89385e-13
		24.19	2.22848e-12	1.50664e-13	1.72631e-12	8.18549e-14	1.90567e-12	2.88894e-13
		24.21	2.22262e-12	1.4968e-13	1.733e-12	7.81802e-14	1.89968e-12	2.90684e-13
		24.23
		24.25
		24.27
		24.29	2.49822e-12	1.64981e-13	2.00808e-12	9.43264e-14	2.29992e-12	3.1863e-13
		24.31	2.49113e-12	1.64682e-13	1.9857e-12	9.48778e-14	2.27328e-12	3.14806e-13
		24.33	2.48308e-12	1.64116e-13	1.98231e-12	9.43459e-14	2.2608e-12	3.14607e-13
		24.35	2.47937e-12	1.62639e-13	1.97979e-12	9.35929e-14	2.24392e-12	3.17791e-13
		24.37	2.4817e-12	1.62775e-13	1.97231e-12	9.38024e-14	2.22925e-12	3.1381e-13
		24.39	2.47974e-12	1.62747e-13	1.97719e-12	9.22476e-14	2.20644e-12	3.09976e-13
		24.41	2.47463e-12	1.60927e-13	1.96816e-12	9.23907e-14	2.19998e-12	3.10492e-13
		24.43	2.46852e-12	1.63861e-13	1.95605e-12	9.43544e-14	2.18102e-12	3.06034e-13
		24.45	2.46863e-12	1.62352e-13	1.95582e-12	9.54773e-14	2.17136e-12	3.07588e-13
		24.47	2.46457e-12	1.61983e-13	1.95322e-12	8.95846e-14	2.15277e-12	3.05376e-13
		24.49	2.45642e-12	1.62771e-13	1.94139e-12	9.31911e-14	2.14415e-12	3.07761e-13
		24.51	2.45987e-12	1.64067e-13	1.93913e-12	9.37738e-14	2.1303e-12	3.0434e-13
		24.53	2.44883e-12	1.61973e-13	1.93692e-12	9.43277e-14	2.12586e-12	3.0397e-13
		24.55	2.44772e-12	1.62539e-13	1.92045e-12	9.7422e-14	2.11478e-12	3.02987e-13
		24.57	2.44296e-12	1.62147e-13	1.92057e-12	9.88246e-14	2.10818e-12	3.03039e-13
		24.59	2.43247e-12	1.6219e-13	1.90989e-12	9.68225e-14	2.09623e-12	2.9935e-13
		24.61	2.43007e-12	1.61213e-13	1.8935e-12	1.01861e-13	2.09138e-12	3.02004e-13
		24.63	2.43003e-12	1.6044e-13	1.89959e-12	9.68113e-14	2.08278e-12	2.99729e-13
		24.65	2.42743e-12	1.62357e-13	1.8856e-12	1.01791e-13	2.07503e-12	2.99735e-13
		24.67	2.4189e-12	1.61464e-13	1.8858e-12	1.0036e-13	2.06392e-12	2.99489e-13
		24.69	2.41015e-12	1.61001e-13	1.88555e-12	9.85979e-14	2.06158e-12	3.01781e-13
		24.71	2.41266e-12	1.6068e-13	1.87816e-12	9.942e-14	2.04831e-12	2.98232e-13
		24.73	2.40133e-12	1.5899e-13	1.87225e-12	1.01807e-13	2.04589e-12	2.99853e-13
		24.75	2.4039e-12	1.59689e-13	1.87341e-12	9.67237e-14	2.04077e-12	2.98784e-13
		24.77	2.39417e-12	1.58573e-13	1.86968e-12	9.839e-14	2.03699e-12	3.01322e-13
		24.79	2.38191e-12	1.58887e-13	1.8667e-12	9.69452e-14	2.02893e-12	2.99767e-13
		24.81	2.38079e-12	1.60355e-13	1.85895e-12	9.52021e-14	2.0219e-12	2.9809e-13
		24.83	2.37566e-12	1.58387e-13	1.86309e-12	9.24132e-14	2.0177e-12	2.97373e-13
		24.85	2.37194e-12	1.56757e-13	1.85119e-12	9.63712e-14	2.00726e-12	2.94687e-13
		24.87	2.36774e-12	1.57205e-13	1.84101e-12	1.01276e-13	2.01173e-12	2.99374e-13
		24.89	2.36269e-12	1.57612e-13	1.84309e-12	9.4607e-14	2.00034e-12	2.97276e-13
		24.91	2.35565e-12	1.58639e-13	1.83335e-12	9.47251e-14	1.99539e-12	2.95436e-13
		24.93	2.34804e-12	1.5717e-13	1.84317e-12	9.1045e-14	1.99319e-12	2.93926e-13
		24.95	2.34567e-12	1.56977e-13	1.83552e-12	9.33126e-14	1.9924e-12	2.94435e-13
		24.97	2.33869e-12	1.54927e-13	1.82562e-12	9.33767e-14	1.98698e-12	2.94069e-13
		24.99	2.33937e-12	1.556e-13	1.82504e-12	9.22152e-14	1.97846e-12	2.92077e-13
		25.01	2.32895e-12	1.54e-13	1.81365e-12	9.22241e-14	1.97532e-12	2.93631e-13
		25.03	2.31573e-12	1.54279e-13	1.80429e-12	9.72309e-14	1.97303e-12	2.90818e-13
		25.05	2.31933e-12	1.53844e-13	1.80725e-12	9.23869e-14	1.96698e-12	2.90808e-13
		25.07	2.31272e-12	1.53571e-13	1.80422e-12	9.21544e-14	1.96731e-12	2.91466e-13
		25.09	2.31052e-12	1.52796e-13	1.79995e-12	8.85855e-14	1.96362e-12	2.94096e-13
		25.11	2.29996e-12	1.53449e-13	1.79702e-12	8.78896e-14	1.95529e-12	2.93799e-13
		25.13	2.29777e-12	1.52055e-13	1.79139e-12	9.13332e-14	1.94897e-12	2.90819e-13
		25.15	2.28797e-12	1.51794e-13	1.78829e-12	9.00468e-14	1.9418e-12	2.90163e-13
		25.17	2.29045e-12	1.50608e-13	1.77951e-12	9.22574e-14	1.94326e-12	2.89407e-13
		25.19	2.2845e-12	1.51407e-13	1.77122e-12	9.11883e-14	1.93311e-12	2.89626e-13
		25.21	2.2757e-12	1.50876e-13	1.77005e-12	8.7475e-14	1.933e-12	2.88922e-13
		25.23	2.27387e-12	1.51281e-13	1.76253e-12	9.04025e-14	1.93178e-12	2.88645e-13
		25.25	2.26742e-12	1.51037e-13	1.7598e-12	9.28304e-14	1.9283e-12	2.88497e-13
		25.27	2.26098e-12	1.50466e-13	1.76549e-12	8.81094e-14	1.91999e-12	2.85744e-13
		25.29	2.25805e-12	1.51434e-13	1.74639e-12	9.4008e-14	1.92417e-12	2.85401e-13
		25.31	2.25952e-12	1.49463e-13	1.75818e-12	8.64269e-14	1.91943e-12	2.83957e-13
		25.33	2.25624e-12	1.49072e-13	1.75052e-12	8.80171e-14	1.91587e-12	2.84442e-13
		25.35	2.25713e-12	1.48894e-13	1.74522e-12	8.67737e-14	1.91248e-12	2.85906e-13
		25.37	2.25091e-12	1.48127e-13	1.74255e-12	8.98225e-14	1.90809e-12	2.83859e-13
		25.39	2.24749e-12	1.47832e-13	1.74614e-12	8.83002e-14	1.90569e-12	2.81745e-13
		25.41	2.23923e-12	1.47705e-13	1.73569e-12	8.92875e-14	1.90657e-12	2.82808e-13
		25.43	2.23007e-12	1.47335e-13	1.72972e-12	8.60028e-14	1.89799e-12	2.82373e-13
		25.45	2.22934e-12	1.47294e-13	1.73275e-12	8.89567e-14	1.8935e-12	2.81551e-13
		25.47	2.22679e-12	1.48219e-13	1.7346e-12	8.51437e-14	1.89033e-12	2.82297e-13
		25.49	2.22026e-12	1.47161e-13	1.72655e-12	8.60639e-14	1.88615e-12	2.81736e-13
		25.51	2.21945e-12	1.45678e-13	1.72494e-12	8.25185e-14	1.88235e-12	2.80403e-13
		25.53	2.21843e-12	1.45854e-13	1.72584e-12	8.52955e-14	1.88146e-12	2.77728e-13
		25.55	2.21722e-12	1.45395e-13	1.72542e-12	8.35753e-14	1.87814e-12	2.79699e-13
		25.57	2.20491e-12	1.44604e-13	1.71058e-12	8.91847e-14	1.87781e-12	2.78393e-13
		25.59	2.21075e-12	1.43916e-13	1.71165e-12	8.85107e-14	1.87171e-12	2.75021e-13
		25.61	2.20567e-12	1.45637e-13	1.71004e-12	8.56633e-14	1.87161e-12	2.76683e-13
		25.63	2.19947e-12	1.45308e-13	1.70751e-12	8.9545e-14	1.86779e-12	2.75213e-13
		25.65	2.19736e-12	1.44216e-13	1.71306e-12	8.3265e-14	1.86818e-12	2.76665e-13
		25.67	2.1921e-12	1.46241e-13	1.6963e-12	8.98731e-14	1.86116e-12	2.73922e-13
		25.69	2.18945e-12	1.43715e-13	1.69592e-12	8.36418e-14	1.85796e-12	2.7325e-13
		25.71	2.18977e-12	1.45538e-13	1.68409e-12	9.11918e-14	1.85489e-12	2.72488e-13
		25.73	2.18004e-12	1.45183e-13	1.68499e-12	8.6412e-14	1.85424e-12	2.72301e-13
		25.75	2.17643e-12	1.44759e-13	1.68025e-12	8.73822e-14	1.85003e-12	2.73516e-13
		25.77	2.17774e-12	1.44508e-13	1.69405e-12	8.40232e-14	1.84851e-12	2.72882e-13
		25.79	2.17698e-12	1.44043e-13	1.68679e-12	8.41524e-14	1.83956e-12	2.71233e-13
		25.81	2.17241e-12	1.42592e-13	1.67891e-12	8.76149e-14	1.83975e-12	2.70775e-13
		25.83	2.17159e-12	1.43571e-13	1.67264e-12	9.16762e-14	1.84156e-12	2.7352e-13
		25.85	2.1655e-12	1.43118e-13	1.66907e-12	8.97265e-14	1.83476e-12	2.70185e-13
		25.87	2.16192e-12	1.43096e-13	1.68114e-12	8.50906e-14	1.82895e-12	2.71915e-13
		25.89	2.16472e-12	1.44362e-13	1.6605e-12	8.92735e-14	1.83083e-12	2.68898e-13
		25.91	2.15857e-12	1.44384e-13	1.66867e-12	8.37627e-14	1.82884e-12	2.70019e-13
		25.93	2.15158e-12	1.42668e-13	1.65939e-12	8.56548e-14	1.82391e-12	2.70609e-13
		25.95	2.14824e-12	1.43464e-13	1.66131e-12	8.10713e-14	1.82178e-12	2.68412e-13
		25.97	2.14641e-12	1.4317e-13	1.65939e-12	8.61386e-14	1.82814e-12	2.69292e-13
		25.99	2.14681e-12	1.42794e-13	1.66422e-12	8.58046e-14	1.82034e-12	2.68331e-13
		26.01	2.14359e-12	1.4146e-13	1.64629e-12	8.62148e-14	1.81742e-12	2.68383e-13
		26.03	2.14158e-12	1.41738e-13	1.65293e-12	8.77943e-14	1.81585e-12	2.68514e-13
		26.05	2.13726e-12	1.4125e-13	1.64354e-12	8.40385e-14	1.81552e-12	2.65128e-13
		26.07	2.13557e-12	1.40698e-13	1.6361e-12	8.53807e-14	1.81671e-12	2.65819e-13
		26.09	2.12956e-12	1.39685e-13	1.64627e-12	8.41859e-14	1.80491e-12	2.64346e-13
		26.11	2.12907e-12	1.40708e-13	1.64416e-12	8.44184e-14	1.80428e-12	2.64684e-13
		26.13	2.1294e-12	1.40339e-13	1.63858e-12	8.31913e-14	1.8028e-12	2.65162e-13
		26.15	2.12141e-12	1.40249e-13	1.62749e-12	8.55474e-14	1.80021e-12	2.66375e-13
		26.17	2.12086e-12	1.40326e-13	1.62562e-12	8.60512e-14	1.79583e-12	2.60765e-13
		26.19	2.11764e-12	1.39681e-13	1.62819e-12	8.76514e-14	1.79638e-12	2.60339e-13
		26.21	2.11472e-12	1.40442e-13	1.62711e-12	8.35134e-14	1.7919e-12	2.61989e-13
		26.23	2.10905e-12	1.40051e-13	1.62848e-12	8.20465e-14	1.79052e-12	2.62008e-13
		26.25	2.10146e-12	1.39514e-13	1.62119e-12	8.48616e-14	1.79e-12	2.60751e-13
		26.27	2.10555e-12	1.38441e-13	1.62907e-12	8.28831e-14	1.78476e-12	2.63353e-13
		26.29	2.1057e-12	1.38999e-13	1.62557e-12	8.1897e-14	1.7829e-12	2.61695e-13
		26.31	2.09694e-12	1.39446e-13	1.6258e-12	7.92864e-14	1.78009e-12	2.63447e-13
		26.33	2.09331e-12	1.38134e-13	1.61083e-12	8.14308e-14	1.77308e-12	2.62985e-13
		26.35	2.08941e-12	1.38425e-13	1.61298e-12	8.13904e-14	1.76792e-12	2.61924e-13
		26.37	2.08731e-12	1.37547e-13	1.60503e-12	8.05509e-14	1.76725e-12	2.60995e-13
		26.39	2.08239e-12	1.38681e-13	1.61122e-12	8.05234e-14	1.75806e-12	2.62043e-13
		26.41	2.08506e-12	1.37617e-13	1.59969e-12	8.20942e-14	1.76646e-12	2.6321e-13
		26.43	2.08091e-12	1.37467e-13	1.60172e-12	7.89737e-14	1.75911e-12	2.61113e-13
		26.45	2.07947e-12	1.38558e-13	1.60142e-12	7.95739e-14	1.76451e-12	2.5993e-13
		26.47	2.08043e-12	1.37317e-13	1.59015e-12	7.88814e-14	1.75599e-12	2.58513e-13
		26.49	2.07955e-12	1.38495e-13	1.59951e-12	8.16196e-14	1.75775e-12	2.57769e-13
		26.51	2.06806e-12	1.36796e-13	1.58712e-12	7.88969e-14	1.75814e-12	2.56881e-13
		26.53	2.07115e-12	1.36465e-13	1.58543e-12	7.92727e-14	1.75977e-12	2.58428e-13
		26.55	2.06705e-12	1.36823e-13	1.58952e-12	7.49289e-14	1.75417e-12	2.56331e-13
		26.57	2.05628e-12	1.36426e-13	1.57821e-12	7.99208e-14	1.75729e-12	2.54376e-13
		26.59	2.05811e-12	1.37269e-13	1.58588e-12	7.95809e-14	1.75266e-12	2.57161e-13
		26.61	2.05192e-12	1.34713e-13	1.58384e-12	7.31761e-14	1.75286e-12	2.54581e-13
		26.63	2.0521e-12	1.35624e-13	1.56614e-12	8.05804e-14	1.75045e-12	2.53398e-13
		26.65	2.04914e-12	1.35376e-13	1.56871e-12	7.59149e-14	1.74846e-12	2.5576e-13
		26.67	2.04767e-12	1.34899e-13	1.56852e-12	7.89417e-14	1.74677e-12	2.56288e-13
		26.69	2.04727e-12	1.34668e-13	1.57654e-12	7.24331e-14	1.74618e-12	2.56478e-13
		26.71	2.04179e-12	1.34548e-13	1.56374e-12	7.82593e-14	1.74716e-12	2.5598e-13
		26.73	2.03873e-12	1.33589e-13	1.56406e-12	8.13286e-14	1.73718e-12	2.53013e-13
		26.75	2.03638e-12	1.33584e-13	1.56598e-12	7.46842e-14	1.7386e-12	2.52663e-13
		26.77	2.03744e-12	1.33851e-13	1.56671e-12	7.48498e-14	1.73242e-12	2.53162e-13
		26.79	2.03332e-12	1.33954e-13	1.55818e-12	8.04248e-14	1.73158e-12	2.51448e-13
		26.81	2.03445e-12	1.31856e-13	1.55385e-12	8.1771e-14	1.73075e-12	2.5284e-13
		26.83	2.02856e-12	1.3301e-13	1.55389e-12	7.91669e-14	1.73071e-12	2.53973e-13
		26.85	2.02311e-12	1.33174e-13	1.56222e-12	7.53302e-14	1.73653e-12	2.54092e-13
		26.87	2.01718e-12	1.33239e-13	1.55217e-12	7.56549e-14	1.7287e-12	2.53187e-13
		26.89	2.01354e-12	1.31292e-13	1.55264e-12	7.63241e-14	1.73137e-12	2.52957e-13
		26.91	2.01417e-12	1.33289e-13	1.55942e-12	7.37144e-14	1.73078e-12	2.52935e-13
		26.93	2.01505e-12	1.31132e-13	1.54498e-12	7.8978e-14	1.72657e-12	2.49079e-13
		26.95	2.0123e-12	1.32103e-13	1.54443e-12	7.93185e-14	1.72267e-12	2.47494e-13
		26.97	2.00457e-12	1.2991e-13	1.54646e-12	8.02057e-14	1.72116e-12	2.52129e-13
		26.99	2.00822e-12	1.31801e-13	1.5478e-12	7.43797e-14	1.71599e-12	2.50735e-13
		27.01	2.00601e-12	1.30526e-13	1.53198e-12	7.70809e-14	1.72233e-12	2.50171e-13
		27.03	2.00146e-12	1.30652e-13	1.53501e-12	7.34016e-14	1.71819e-12	2.53634e-13
		27.05	1.99799e-12	1.29962e-13	1.53453e-12	7.58418e-14	1.71416e-12	2.507e-13
		27.07	1.99998e-12	1.30741e-13	1.53234e-12	7.8985e-14	1.71341e-12	2.50468e-13
		27.09	1.99085e-12	1.30364e-13	1.52677e-12	8.01158e-14	1.70833e-12	2.49853e-13
		27.11	1.99199e-12	1.30236e-13	1.52077e-12	7.87826e-14	1.70621e-12	2.48035e-13
		27.13	1.99078e-12	1.303e-13	1.5213e-12	7.60446e-14	1.70941e-12	2.48275e-13
		27.15	1.98842e-12	1.30074e-13	1.51288e-12	7.71564e-14	1.7061e-12	2.47112e-13
		27.17	1.98741e-12	1.29965e-13	1.51768e-12	7.51675e-14	1.70252e-12	2.46449e-13
		27.19	1.98408e-12	1.31399e-13	1.51905e-12	7.19251e-14	1.69924e-12	2.49173e-13
		27.21	1.98543e-12	1.28769e-13	1.50875e-12	7.83874e-14	1.69363e-12	2.47288e-13
		27.23	1.98572e-12	1.29601e-13	1.51368e-12	7.45643e-14	1.69309e-12	2.48432e-13
		27.25	1.98049e-12	1.30803e-13	1.50873e-12	7.32158e-14	1.69677e-12	2.46115e-13
		27.27	1.97428e-12	1.29763e-13	1.49965e-12	7.49146e-14	1.6928e-12	2.49868e-13
		27.29	1.97202e-12	1.28825e-13	1.50585e-12	7.2623e-14	1.68957e-12	2.50987e-13
		27.31	1.96882e-12	1.29001e-13	1.50547e-12	7.02759e-14	1.68497e-12	2.52277e-13
		27.33	1.96878e-12	1.26658e-13	1.50325e-12	7.07047e-14	1.68184e-12	2.4734e-13
		27.35	1.96435e-12	1.28719e-13	1.50084e-12	7.21401e-14	1.68299e-12	2.48276e-13
		27.37	1.96668e-12	1.28703e-13	1.49487e-12	7.1829e-14	1.68406e-12	2.48144e-13
		27.39	1.96325e-12	1.30039e-13	1.48859e-12	7.38329e-14	1.67522e-12	2.48252e-13
		27.41	1.96912e-12	1.28088e-13	1.48534e-12	7.53323e-14	1.68427e-12	2.48852e-13
		27.43	1.95869e-12	1.28555e-13	1.49686e-12	7.00362e-14	1.67183e-12	2.45661e-13
		27.45	1.95611e-12	1.266e-13	1.48955e-12	7.25751e-14	1.67022e-12	2.46152e-13
		27.47	1.95099e-12	1.28364e-13	1.49394e-12	6.88989e-14	1.66572e-12	2.46608e-13
		27.49	1.95142e-12	1.28374e-13	1.49108e-12	6.76234e-14	1.66988e-12	2.48555e-13
		27.51	1.94531e-12	1.27032e-13	1.48046e-12	7.62744e-14	1.66383e-12	2.46197e-13
		27.53	1.94656e-12	1.27019e-13	1.47939e-12	7.10588e-14	1.66425e-12	2.46529e-13
		27.55	1.94088e-12	1.2694e-13	1.47466e-12	7.06343e-14	1.66255e-12	2.47179e-13
		27.57	1.9424e-12	1.26768e-13	1.47523e-12	6.78683e-14	1.66358e-12	2.46986e-13
		27.59	1.93921e-12	1.27728e-13	1.46437e-12	7.50154e-14	1.6597e-12	2.50989e-13
		27.61	1.93804e-12	1.26113e-13	1.47453e-12	6.73154e-14	1.65963e-12	2.45597e-13
		27.63	1.93314e-12	1.264e-13	1.47198e-12	6.74579e-14	1.65783e-12	2.48686e-13
		27.65	1.92442e-12	1.26974e-13	1.46183e-12	7.06315e-14	1.65402e-12	2.4816e-13
		27.67	1.92695e-12	1.26839e-13	1.45931e-12	6.86562e-14	1.64835e-12	2.44217e-13
		27.69	1.92073e-12	1.28975e-13	1.45439e-12	6.82549e-14	1.64991e-12	2.46276e-13
		27.71	1.92846e-12	1.28689e-13	1.45422e-12	6.83571e-14	1.6472e-12	2.46409e-13
		27.73	1.9234e-12	1.26425e-13	1.45308e-12	6.59018e-14	1.6451e-12	2.45313e-13
		27.75	1.9169e-12	1.26894e-13	1.44807e-12	7.07663e-14	1.64931e-12	2.48655e-13
		27.77	1.92001e-12	1.26929e-13	1.4456e-12	6.99186e-14	1.64307e-12	2.45012e-13
		27.79	1.92088e-12	1.26361e-13	1.44702e-12	6.18121e-14	1.64228e-12	2.45888e-13
		27.81	1.91689e-12	1.25897e-13	1.43965e-12	6.50016e-14	1.64029e-12	2.45621e-13
		27.83	1.90968e-12	1.27702e-13	1.43957e-12	6.85993e-14	1.63705e-12	2.46374e-13
		27.85	1.9109e-12	1.2676e-13	1.43792e-12	6.65495e-14	1.64097e-12	2.48141e-13
		27.87	1.90905e-12	1.27586e-13	1.43949e-12	6.58432e-14	1.63812e-12	2.45849e-13
		27.89	1.90616e-12	1.2484e-13	1.43592e-12	6.33989e-14	1.63277e-12	2.46826e-13
		27.91	1.90109e-12	1.25172e-13	1.43505e-12	6.3413e-14	1.6332e-12	2.45806e-13
		27.93	1.89983e-12	1.26366e-13	1.43226e-12	6.56774e-14	1.63392e-12	2.47767e-13
		27.95	1.89908e-12	1.26261e-13	1.43226e-12	6.42984e-14	1.63074e-12	2.43968e-13
		27.97	1.90058e-12	1.25669e-13	1.42785e-12	6.88448e-14	1.63287e-12	2.44765e-13
		27.99	1.89439e-12	1.25849e-13	1.42708e-12	6.7483e-14	1.62718e-12	2.44291e-13
		28.01	1.89771e-12	1.27756e-13	1.4314e-12	6.25169e-14	1.62958e-12	2.4832e-13
		28.03	1.88896e-12	1.25885e-13	1.41901e-12	6.34776e-14	1.63287e-12	2.46805e-13
		28.05	1.88736e-12	1.27104e-13	1.42098e-12	6.31258e-14	1.62612e-12	2.45198e-13
		28.07	1.89159e-12	1.27093e-13	1.44067e-12	7.13769e-14	1.63193e-12	2.4483e-13
		28.09	1.8844e-12	1.26116e-13	1.43404e-12	7.51849e-14	1.63107e-12	2.45836e-13
		28.11	1.88499e-12	1.25685e-13	1.43816e-12	7.50875e-14	1.62849e-12	2.46702e-13
		28.13	1.87939e-12	1.25202e-13	1.42488e-12	8.20291e-14	1.62544e-12	2.47173e-13
		28.15	1.87835e-12	1.25052e-13	1.43816e-12	7.44047e-14	1.62313e-12	2.46281e-13
		28.17	1.88091e-12	1.26252e-13	1.42832e-12	7.3859e-14	1.62028e-12	2.44597e-13
		28.19	1.87321e-12	1.25487e-13	1.41053e-12	8.5951e-14	1.62076e-12	2.43973e-13
		28.21	1.87241e-12	1.25646e-13	1.42565e-12	7.80594e-14	1.62014e-12	2.45731e-13
		28.23	1.87411e-12	1.24729e-13	1.42562e-12	7.68485e-14	1.61788e-12	2.41418e-13
		28.25	1.87251e-12	1.22526e-13	1.42258e-12	7.90053e-14	1.61985e-12	2.47094e-13
		28.27	1.86842e-12	1.23544e-13	1.40965e-12	8.35013e-14	1.61596e-12	2.43533e-13
		28.29	1.86787e-12	1.23217e-13	1.41425e-12	7.9632e-14	1.61931e-12	2.49001e-13
		28.31	1.8646e-12	1.21896e-13	1.42034e-12	6.98187e-14	1.61428e-12	2.47181e-13
		28.33	1.86283e-12	1.24364e-13	1.41029e-12	7.65635e-14	1.609e-12	2.46676e-13
		28.35	1.86419e-12	1.2361e-13	1.40743e-12	8.10716e-14	1.61162e-12	2.44702e-13
		28.37	1.86712e-12	1.23322e-13	1.39668e-12	8.15675e-14	1.60928e-12	2.45983e-13
		28.39	1.86229e-12	1.23814e-13	1.404e-12	8.13455e-14	1.60594e-12	2.49029e-13
		28.41	1.863e-12	1.2306e-13	1.40425e-12	7.23338e-14	1.61083e-12	2.50132e-13
		28.43	1.86131e-12	1.21757e-13	1.4037e-12	7.58955e-14	1.60744e-12	2.47238e-13
		28.45	1.85269e-12	1.23956e-13	1.39131e-12	8.08865e-14	1.60473e-12	2.46346e-13
		28.47	1.85779e-12	1.22452e-13	1.39934e-12	7.53065e-14	1.60283e-12	2.49003e-13
		28.49	1.85242e-12	1.21387e-13	1.39196e-12	8.05361e-14	1.60366e-12	2.47653e-13
		28.51	1.85311e-12	1.21968e-13	1.40085e-12	7.49955e-14	1.60255e-12	2.4913e-13
		28.53	1.85981e-12	1.20422e-13	1.39182e-12	7.57882e-14	1.59571e-12	2.47114e-13
		28.55	1.84779e-12	1.19937e-13	1.3818e-12	8.05384e-14	1.59852e-12	2.47749e-13
		28.57	1.84537e-12	1.19269e-13	1.38353e-12	7.43751e-14	1.60211e-12	2.45779e-13
		28.59	1.84154e-12	1.20797e-13	1.37818e-12	8.07498e-14	1.60251e-12	2.48045e-13
		28.61	1.8405e-12	1.20009e-13	1.37354e-12	8.24285e-14	1.59756e-12	2.483e-13
		28.63	1.84122e-12	1.20266e-13	1.37608e-12	7.97934e-14	1.59783e-12	2.46054e-13
		28.65	1.83898e-12	1.22146e-13	1.37349e-12	7.57906e-14	1.60079e-12	2.45866e-13
		28.67	1.83977e-12	1.19531e-13	1.37695e-12	7.68785e-14	1.59675e-12	2.46239e-13
		28.69	1.8403e-12	1.21037e-13	1.37386e-12	7.66017e-14	1.59252e-12	2.4663e-13
		28.71	1.83613e-12	1.21597e-13	1.38383e-12	6.95883e-14	1.59483e-12	2.45224e-13
		28.73	1.83444e-12	1.19615e-13	1.37116e-12	7.81513e-14	1.59161e-12	2.45499e-13
		28.75	1.83128e-12	1.19914e-13	1.37405e-12	7.68948e-14	1.59076e-12	2.474e-13
		28.77	1.83443e-12	1.19521e-13	1.36901e-12	7.95834e-14	1.5883e-12	2.42695e-13
		28.79	1.82637e-12	1.20308e-13	1.36839e-12	7.42418e-14	1.58817e-12	2.47298e-13
		28.81	1.82924e-12	1.18903e-13	1.36408e-12	7.71457e-14	1.58705e-12	2.45816e-13
		28.83	1.82622e-12	1.21023e-13	1.36453e-12	7.33734e-14	1.58579e-12	2.4749e-13
		28.85	1.82502e-12	1.2026e-13	1.36016e-12	7.40282e-14	1.58464e-12	2.44687e-13
		28.87	1.82224e-12	1.19336e-13	1.36453e-12	7.19236e-14	1.58774e-12	2.44718e-13
		28.89	1.82038e-12	1.19088e-13	1.35167e-12	8.23456e-14	1.58081e-12	2.44046e-13
		28.91	1.8126e-12	1.19971e-13	1.36591e-12	7.27656e-14	1.58431e-12	2.4454e-13
		28.93	1.81025e-12	1.19483e-13	1.35192e-12	7.27501e-14	1.58273e-12	2.46448e-13
		28.95	1.81109e-12	1.16756e-13	1.35699e-12	7.68203e-14	1.5784e-12	2.45626e-13
		28.97	1.8076e-12	1.20058e-13	1.35784e-12	7.52516e-14	1.58256e-12	2.44819e-13
		28.99	1.80732e-12	1.19864e-13	1.35446e-12	7.24705e-14	1.57662e-12	2.46711e-13
		29.01	1.80593e-12	1.18394e-13	1.34175e-12	8.40734e-14	1.57487e-12	2.43789e-13
		29.03	1.80563e-12	1.19177e-13	1.35682e-12	7.61461e-14	1.57555e-12	2.42739e-13
		29.05	1.80456e-12	1.19898e-13	1.34129e-12	8.06929e-14	1.57491e-12	2.45535e-13
		29.07	1.80055e-12	1.18853e-13	1.34806e-12	7.33502e-14	1.57423e-12	2.45941e-13
		29.09	1.80373e-12	1.18106e-13	1.34229e-12	7.82225e-14	1.57084e-12	2.46551e-13
		29.11	1.7907e-12	1.17895e-13	1.34142e-12	7.51276e-14	1.57171e-12	2.45519e-13
		29.13	1.7936e-12	1.18753e-13	1.34886e-12	7.1684e-14	1.57143e-12	2.45026e-13
		29.15	1.79209e-12	1.17443e-13	1.32784e-12	8.31356e-14	1.57023e-12	2.46452e-13
		29.17	1.79394e-12	1.18144e-13	1.3289e-12	7.84707e-14	1.56652e-12	2.44935e-13
		29.19	1.79388e-12	1.20407e-13	1.34104e-12	7.44137e-14	1.56391e-12	2.465e-13
		29.21	1.79237e-12	1.18565e-13	1.32659e-12	7.44643e-14	1.56494e-12	2.42574e-13
		29.23	1.79553e-12	1.17029e-13	1.33962e-12	7.25817e-14	1.56757e-12	2.43184e-13
		29.25	1.79201e-12	1.18829e-13	1.32891e-12	7.25019e-14	1.5628e-12	2.4445e-13
		29.27	1.79058e-12	1.1965e-13	1.3263e-12	7.79347e-14	1.56408e-12	2.4486e-13
		29.29	1.79031e-12	1.18941e-13	1.3212e-12	7.52425e-14	1.56174e-12	2.4616e-13
		29.31	1.78415e-12	1.20082e-13	1.31266e-12	8.03784e-14	1.56214e-12	2.48901e-13
		29.33	1.78472e-12	1.19272e-13	1.30646e-12	8.39548e-14	1.56026e-12	2.42615e-13
		29.35	1.78341e-12	1.1764e-13	1.30377e-12	8.1416e-14	1.56134e-12	2.44492e-13
		29.37	1.78555e-12	1.17467e-13	1.30394e-12	8.14158e-14	1.56283e-12	2.44203e-13
		29.39	1.78006e-12	1.15249e-13	1.32388e-12	7.29274e-14	1.55727e-12	2.45595e-13
		29.41	1.78208e-12	1.16834e-13	1.31883e-12	7.61598e-14	1.55929e-12	2.44709e-13
		29.43	1.78082e-12	1.16523e-13	1.30734e-12	7.7188e-14	1.55759e-12	2.46922e-13
		29.45	1.77545e-12	1.15634e-13	1.31214e-12	7.39491e-14	1.5584e-12	2.46e-13
		29.47	1.77299e-12	1.1687e-13	1.30701e-12	7.58105e-14	1.55884e-12	2.43916e-13
		29.49	1.78172e-12	1.16763e-13	1.30638e-12	7.53942e-14	1.55568e-12	2.4901e-13
		29.51	1.76605e-12	1.16162e-13	1.31156e-12	6.92975e-14	1.5541e-12	2.46274e-13
		29.53	1.77162e-12	1.18083e-13	1.29997e-12	7.35405e-14	1.55252e-12	2.46452e-13
		29.55	1.77113e-12	1.16909e-13	1.3087e-12	7.2892e-14	1.54871e-12	2.47611e-13
		29.57	1.76793e-12	1.15401e-13	1.29594e-12	7.78672e-14	1.55196e-12	2.49631e-13
		29.59	1.76692e-12	1.15907e-13	1.30201e-12	7.30747e-14	1.54673e-12	2.49396e-13
		29.61	1.75517e-12	1.16856e-13	1.29861e-12	7.53444e-14	1.54947e-12	2.47704e-13
		29.63	1.7636e-12	1.16448e-13	1.29202e-12	7.8692e-14	1.54785e-12	2.46203e-13
		29.65	1.75458e-12	1.16555e-13	1.29523e-12	7.85774e-14	1.54497e-12	2.47163e-13
		29.67	1.75564e-12	1.17689e-13	1.29248e-12	7.12131e-14	1.5413e-12	2.46821e-13
		29.69	1.75771e-12	1.16299e-13	1.28383e-12	7.87699e-14	1.54564e-12	2.45878e-13
		29.71	1.75498e-12	1.17094e-13	1.28139e-12	7.81991e-14	1.54532e-12	2.45432e-13
		29.73	1.74337e-12	1.16196e-13	1.27765e-12	7.72039e-14	1.54645e-12	2.47051e-13
		29.75	1.74311e-12	1.1735e-13	1.2733e-12	7.90704e-14	1.54065e-12	2.4885e-13
		29.77	1.74326e-12	1.16241e-13	1.28611e-12	7.10969e-14	1.54694e-12	2.46528e-13
		29.79	1.74864e-12	1.14947e-13	1.27808e-12	7.89477e-14	1.5391e-12	2.48114e-13
		29.81	1.7444e-12	1.14622e-13	1.27507e-12	7.91736e-14	1.53668e-12	2.46597e-13
		29.83	1.7386e-12	1.15321e-13	1.26622e-12	7.80786e-14	1.53985e-12	2.47121e-13
		29.85	1.74444e-12	1.14735e-13	1.2649e-12	7.70014e-14	1.5379e-12	2.46295e-13
		29.87	1.7396e-12	1.15864e-13	1.26266e-12	7.99e-14	1.53991e-12	2.48787e-13
		29.89	1.73891e-12	1.14161e-13	1.2621e-12	8.15093e-14	1.53634e-12	2.45284e-13
		29.91	1.73922e-12	1.1481e-13	1.26171e-12	7.90361e-14	1.53795e-12	2.45525e-13
		29.93	1.73347e-12	1.17074e-13	1.25157e-12	8.00685e-14	1.53819e-12	2.44796e-13
		29.95	1.73208e-12	1.16545e-13	1.25357e-12	8.44117e-14	1.53721e-12	2.45663e-13
		29.97	1.73067e-12	1.16089e-13	1.26161e-12	7.70869e-14	1.53563e-12	2.47634e-13
		29.99	1.7293e-12	1.14441e-13	1.25639e-12	8.08502e-14	1.5333e-12	2.4823e-13
		30.01	1.72917e-12	1.15823e-13	1.24946e-12	7.63022e-14	1.52441e-12	2.45343e-13
		30.03	1.72934e-12	1.15726e-13	1.25511e-12	7.42846e-14	1.53023e-12	2.44624e-13
		30.05	1.72449e-12	1.1494e-13	1.24533e-12	7.72969e-14	1.53093e-12	2.48038e-13
		30.07	1.72567e-12	1.15024e-13	1.24207e-12	8.15211e-14	1.53313e-12	2.44062e-13
		30.09	1.73147e-12	1.17436e-13	1.24904e-12	7.73532e-14	1.52837e-12	2.48411e-13
		30.11	1.73216e-12	1.14247e-13	1.24999e-12	7.16215e-14	1.5267e-12	2.45254e-13
		30.13	1.72672e-12	1.13992e-13	1.23682e-12	7.83654e-14	1.52664e-12	2.46042e-13
		30.15	1.72815e-12	1.18062e-13	1.24165e-12	7.30959e-14	1.52396e-12	2.47586e-13
		30.17	1.72406e-12	1.15669e-13	1.24773e-12	6.94482e-14	1.52075e-12	2.46727e-13
		30.19	1.71733e-12	1.14906e-13	1.23363e-12	7.44998e-14	1.52086e-12	2.46933e-13
		30.21	1.71556e-12	1.13527e-13	1.24947e-12	6.75538e-14	1.52059e-12	2.48947e-13
		30.23	1.71777e-12	1.12876e-13	1.22633e-12	7.52208e-14	1.51753e-12	2.49867e-13
		30.25	1.715e-12	1.16153e-13	1.23978e-12	6.8813e-14	1.51807e-12	2.49323e-13
		30.27	1.71062e-12	1.12382e-13	1.24141e-12	6.92195e-14	1.52282e-12	2.47136e-13
		30.29	1.70904e-12	1.14757e-13	1.22402e-12	7.66184e-14	1.51759e-12	2.49426e-13
		30.31	1.70879e-12	1.1427e-13	1.23426e-12	6.61671e-14	1.51849e-12	2.49793e-13
		30.33	1.70851e-12	1.13756e-13	1.21813e-12	7.3012e-14	1.51202e-12	2.48255e-13
		30.35	1.7083e-12	1.1516e-13	1.23516e-12	6.19212e-14	1.5113e-12	2.50773e-13
		30.37	1.70711e-12	1.13816e-13	1.22846e-12	6.91935e-14	1.51493e-12	2.5058e-13
		30.39	1.70365e-12	1.13899e-13	1.22556e-12	6.65322e-14	1.50945e-12	2.49781e-13
		30.41	1.69504e-12	1.14239e-13	1.22405e-12	6.88345e-14	1.51071e-12	2.51244e-13
		30.43	1.69641e-12	1.14439e-13	1.22239e-12	7.10196e-14	1.5139e-12	2.51499e-13
		30.45	1.69682e-12	1.15529e-13	1.22752e-12	6.71413e-14	1.51419e-12	2.51349e-13
		30.47	1.69666e-12	1.15251e-13	1.22045e-12	7.23119e-14	1.51414e-12	2.48214e-13
		30.49	1.69704e-12	1.15614e-13	1.23411e-12	6.02196e-14	1.51881e-12	2.49988e-13
		30.51	1.69382e-12	1.135e-13	1.22581e-12	6.80405e-14	1.50761e-12	2.51928e-13
		30.53	1.68905e-12	1.15237e-13	1.21551e-12	6.83782e-14	1.50667e-12	2.53095e-13
		30.55	1.6912e-12	1.13706e-13	1.21265e-12	6.74385e-14	1.50706e-12	2.5183e-13
		30.57	1.68749e-12	1.14211e-13	1.20584e-12	6.82133e-14	1.50998e-12	2.49325e-13
		30.59	1.68786e-12	1.14643e-13	1.20453e-12	6.41648e-14	1.50579e-12	2.49274e-13
		30.61	1.68999e-12	1.14709e-13	1.20015e-12	7.19584e-14	1.5078e-12	2.52646e-13
		30.63	1.67836e-12	1.13407e-13	1.19701e-12	6.32127e-14	1.50263e-12	2.51482e-13
		30.65	1.68702e-12	1.15568e-13	1.19801e-12	6.66898e-14	1.50136e-12	2.48183e-13
		30.67	1.68927e-12	1.13696e-13	1.19757e-12	6.02684e-14	1.50425e-12	2.50852e-13
		30.69	1.68637e-12	1.15696e-13	1.19512e-12	6.00949e-14	1.50496e-12	2.49547e-13
		30.71	1.68372e-12	1.11762e-13	1.1987e-12	6.11819e-14	1.49928e-12	2.52298e-13
		30.73	1.68017e-12	1.13316e-13	1.19341e-12	6.21825e-14	1.50522e-12	2.51342e-13
		30.75	1.68009e-12	1.13824e-13	1.18692e-12	6.52202e-14	1.50132e-12	2.49656e-13
		30.77	1.67793e-12	1.1268e-13	1.19745e-12	5.98028e-14	1.50128e-12	2.4897e-13
		30.79	1.67154e-12	1.1327e-13	1.19629e-12	5.80816e-14	1.49936e-12	2.49146e-13
		30.81	1.67471e-12	1.16092e-13	1.19393e-12	5.97643e-14	1.49716e-12	2.50227e-13
		30.83	1.67225e-12	1.13155e-13	1.189e-12	6.32003e-14	1.49463e-12	2.51464e-13
		30.85	1.66941e-12	1.1216e-13	1.19875e-12	5.61356e-14	1.49295e-12	2.50739e-13
		30.87	1.66508e-12	1.13167e-13	1.1932e-12	6.31893e-14	1.49333e-12	2.50037e-13
		30.89	1.66492e-12	1.11684e-13	1.20145e-12	5.6886e-14	1.49192e-12	2.4852e-13
		30.91	1.67542e-12	1.10409e-13	1.18879e-12	6.16124e-14	1.48999e-12	2.50327e-13
		30.93	1.66846e-12	1.13014e-13	1.18879e-12	5.82927e-14	1.48578e-12	2.49418e-13
		30.95	1.67079e-12	1.11912e-13	1.18601e-12	6.13244e-14	1.48939e-12	2.47254e-13
		30.97	1.66787e-12	1.1171e-13	1.19118e-12	5.63852e-14	1.48273e-12	2.50295e-13
		30.99	1.66739e-12	1.1268e-13	1.18433e-12	6.26965e-14	1.48638e-12	2.51437e-13
		31.01	1.66056e-12	1.12827e-13	1.18208e-12	5.72957e-14	1.48365e-12	2.50947e-13
		31.03	1.66465e-12	1.13357e-13	1.1892e-12	5.45054e-14	1.47538e-12	2.49453e-13
		31.05	1.66214e-12	1.10783e-13	1.16926e-12	6.06687e-14	1.47745e-12	2.48932e-13
		31.07	1.65794e-12	1.1685e-13	1.18278e-12	5.53156e-14	1.47728e-12	2.48375e-13
		31.09	1.65849e-12	1.15041e-13	1.18071e-12	5.94559e-14	1.47864e-12	2.52783e-13
		31.11	1.65314e-12	1.16217e-13	1.17853e-12	5.82389e-14	1.47554e-12	2.52137e-13
		31.13	1.65256e-12	1.13581e-13	1.17247e-12	5.81712e-14	1.4737e-12	2.4987e-13
		31.15	1.65752e-12	1.12255e-13	1.17303e-12	5.92368e-14	1.4764e-12	2.49438e-13
		31.17	1.65788e-12	1.12564e-13	1.16811e-12	5.88567e-14	1.4687e-12	2.48342e-13
		31.19	1.64683e-12	1.13e-13	1.15715e-12	7.3842e-14	1.46713e-12	2.50682e-13
		31.21	1.6507e-12	1.11117e-13	1.16914e-12	6.48924e-14	1.46785e-12	2.49547e-13
		31.23	1.64758e-12	1.09424e-13	1.17159e-12	5.84792e-14	1.46824e-12	2.48751e-13
		31.25	1.65162e-12	1.12084e-13	1.15635e-12	6.70457e-14	1.46996e-12	2.49622e-13
		31.27	1.64528e-12	1.12251e-13	1.17012e-12	5.51972e-14	1.46614e-12	2.49535e-13
		31.29	1.64504e-12	1.1305e-13	1.1594e-12	6.06558e-14	1.46807e-12	2.51816e-13
		31.31	1.64248e-12	1.11211e-13	1.17037e-12	5.45208e-14	1.46546e-12	2.49722e-13
		31.33	1.63949e-12	1.12896e-13	1.15285e-12	6.50314e-14	1.46446e-12	2.48816e-13
		31.35	1.64297e-12	1.11333e-13	1.162e-12	5.68426e-14	1.46597e-12	2.49418e-13
		31.37	1.63759e-12	1.11671e-13	1.14989e-12	6.2687e-14	1.46476e-12	2.47921e-13
		31.39	1.63869e-12	1.10042e-13	1.14292e-12	6.516e-14	1.46477e-12	2.50242e-13
		31.41	1.63625e-12	1.1024e-13	1.13775e-12	6.25925e-14	1.46562e-12	2.4914e-13
		31.43	1.63626e-12	1.10921e-13	1.15797e-12	5.73971e-14	1.46234e-12	2.50697e-13
		31.45	1.63154e-12	1.11496e-13	1.14022e-12	6.14968e-14	1.46169e-12	2.50639e-13
		31.47	1.63005e-12	1.3969e-13	1.13961e-12	6.39101e-14	1.46321e-12	2.52647e-13
		31.49	1.62656e-12	1.34935e-13	1.13641e-12	5.49888e-14	1.45415e-12	2.51446e-13
		31.51	1.6246e-12	1.35102e-13	1.14528e-12	5.31937e-14	1.45707e-12	2.50247e-13
		31.53	1.62829e-12	1.34528e-13	1.14606e-12	5.47466e-14	1.45601e-12	2.52378e-13
		31.55	1.62423e-12	1.35521e-13	1.13288e-12	5.51226e-14	1.45742e-12	2.5357e-13
		31.57	1.62632e-12	1.3448e-13	1.13649e-12	6.01607e-14	1.45639e-12	2.50613e-13
		31.59	1.61734e-12	1.36639e-13	1.13694e-12	5.2988e-14	1.45596e-12	2.51008e-13
		31.61	1.616e-12	1.36779e-13	1.12047e-12	5.93088e-14	1.4493e-12	2.52506e-13
		31.63	1.61318e-12	1.36575e-13	1.12438e-12	6.08101e-14	1.45198e-12	2.52518e-13
		31.65	1.61077e-12	1.36646e-13	1.12625e-12	5.44811e-14	1.45314e-12	2.52583e-13
		31.67	1.60982e-12	1.36348e-13	1.13508e-12	5.47388e-14	1.4485e-12	2.5238e-13
		31.69	1.61425e-12	1.33813e-13	1.1276e-12	5.51328e-14	1.44769e-12	2.48826e-13
		31.71	1.60648e-12	1.36138e-13	1.13805e-12	4.61854e-14	1.44667e-12	2.53902e-13
		31.73	1.60588e-12	1.3605e-13	1.12434e-12	5.45297e-14	1.44664e-12	2.50363e-13
		31.75	1.60782e-12	1.34045e-13	1.12721e-12	5.28049e-14	1.44867e-12	2.52144e-13
		31.77	1.60087e-12	1.34996e-13	1.12464e-12	5.63645e-14	1.4484e-12	2.52862e-13
		31.79	1.60685e-12	1.34215e-13	1.12759e-12	5.38245e-14	1.44526e-12	2.53046e-13
		31.81	1.61094e-12	1.30801e-13	1.1201e-12	5.3993e-14	1.44596e-12	2.52514e-13
		31.83	1.60602e-12	1.31477e-13	1.12553e-12	4.95241e-14	1.44507e-12	2.50724e-13
		31.85	1.60042e-12	1.30689e-13	1.12589e-12	5.1909e-14	1.44561e-12	2.53827e-13
		31.87	1.60396e-12	1.33435e-13	1.12432e-12	5.45702e-14	1.44203e-12	2.54371e-13
		31.89	1.60003e-12	1.33082e-13	1.11896e-12	5.25228e-14	1.44025e-12	2.53895e-13
		31.91	1.59624e-12	1.34531e-13	1.11516e-12	5.13111e-14	1.44148e-12	2.53468e-13
		31.93	1.59132e-12	1.36016e-13	1.11188e-12	4.88977e-14	1.43639e-12	2.53594e-13
		31.95	1.59085e-12	1.36188e-13	1.10819e-12	5.17963e-14	1.44138e-12	2.53014e-13
		31.97	1.59747e-12	1.31643e-13	1.10835e-12	5.12516e-14	1.43777e-12	2.54827e-13
		31.99	1.58918e-12	1.32958e-13	1.11175e-12	4.918e-14	1.44035e-12	2.57485e-13
		32.01	1.59183e-12	1.33774e-13	1.11983e-12	4.50421e-14	1.43852e-12	2.56625e-13
		32.03	1.58839e-12	1.35784e-13	1.11554e-12	4.17953e-14	1.44042e-12	2.58019e-13
		32.05	1.58894e-12	1.36026e-13	1.10475e-12	5.41147e-14	1.43851e-12	2.58269e-13
		32.07	1.58726e-12	1.3378e-13	1.11689e-12	4.43888e-14	1.43442e-12	2.58202e-13
		32.09	1.59305e-12	1.33599e-13	1.11767e-12	4.6836e-14	1.44377e-12	2.59296e-13
		32.11	1.58755e-12	1.3507e-13	1.11123e-12	4.47998e-14	1.43452e-12	2.57485e-13
		32.13	1.59182e-12	1.32285e-13	1.10938e-12	4.97954e-14	1.43358e-12	2.57115e-13
		32.15	1.58512e-12	1.32474e-13	1.11864e-12	4.5338e-14	1.43312e-12	2.56288e-13
		32.17	1.5773e-12	1.33527e-13	1.11603e-12	4.14616e-14	1.42769e-12	2.55411e-13
		32.19	1.58026e-12	1.32938e-13	1.10379e-12	4.98209e-14	1.43348e-12	2.56528e-13
		32.21	1.57366e-12	1.34683e-13	1.11126e-12	3.7191e-14	1.42538e-12	2.53146e-13
		32.23	1.57687e-12	1.34479e-13	1.09992e-12	5.16747e-14	1.42003e-12	2.54265e-13
		32.25	1.58171e-12	1.33451e-13	1.09499e-12	5.24846e-14	1.42963e-12	2.54557e-13
		32.27	1.57745e-12	1.32421e-13	1.10222e-12	4.51998e-14	1.42374e-12	2.54969e-13
		32.29	1.57634e-12	1.30276e-13	1.08953e-12	4.96077e-14	1.42284e-12	2.56584e-13
		32.31	1.57327e-12	1.34155e-13	1.0991e-12	4.28899e-14	1.43075e-12	2.55757e-13
		32.33	1.57166e-12	1.32808e-13	1.09887e-12	4.04498e-14	1.42605e-12	2.52907e-13
		32.35	1.57415e-12	1.32078e-13	1.0912e-12	4.29584e-14	1.43049e-12	2.55084e-13
		32.37	1.56739e-12	1.31433e-13	1.0801e-12	5.168e-14	1.42632e-12	2.57325e-13
		32.39	1.56861e-12	1.31059e-13	1.07458e-12	5.41641e-14	1.42973e-12	2.57215e-13
		32.41	1.56651e-12	1.2968e-13	1.10004e-12	4.07951e-14	1.42549e-12	2.54364e-13
		32.43	1.56348e-12	1.29622e-13	1.08553e-12	4.36858e-14	1.42566e-12	2.58781e-13
		32.45	1.56456e-12	1.28914e-13	1.08242e-12	4.50395e-14	1.42734e-12	2.58987e-13
		32.47	1.56273e-12	1.30111e-13	1.08338e-12	4.37002e-14	1.42356e-12	2.58793e-13
		32.49	1.56141e-12	1.31913e-13	1.08296e-12	4.76237e-14	1.42158e-12	2.5577e-13
		32.51	1.56669e-12	1.30226e-13	1.07973e-12	4.37895e-14	1.41774e-12	2.55652e-13
		32.53	1.55865e-12	1.2834e-13	1.07976e-12	4.73275e-14	1.41966e-12	2.5535e-13
		32.55	1.56547e-12	1.30901e-13	1.08296e-12	4.21556e-14	1.42155e-12	2.56181e-13
		32.57	1.5536e-12	1.31246e-13	1.07057e-12	4.44665e-14	1.41931e-12	2.56471e-13
		32.59	1.55651e-12	1.29949e-13	1.08706e-12	4.30043e-14	1.42074e-12	2.57608e-13
		32.61	1.55162e-12	1.29229e-13	1.08155e-12	4.32313e-14	1.41928e-12	2.57223e-13
		32.63	1.54926e-12	1.31514e-13	1.08194e-12	4.0486e-14	1.41676e-12	2.55016e-13
		32.65	1.551e-12	1.31441e-13	1.08376e-12	4.21848e-14	1.41817e-12	2.5674e-13
		32.67	1.552e-12	1.29725e-13	1.07661e-12	4.42987e-14	1.4184e-12	2.56341e-13
		32.69	1.55629e-12	1.29744e-13	1.06417e-12	4.3086e-14	1.41656e-12	2.60417e-13
		32.71	1.5458e-12	1.32091e-13	1.08061e-12	4.38726e-14	1.41492e-12	2.57844e-13
		32.73	1.5439e-12	1.34004e-13	1.06461e-12	4.92724e-14	1.4153e-12	2.5916e-13
		32.75	1.54869e-12	1.30718e-13	1.06773e-12	4.59829e-14	1.41561e-12	2.57138e-13
		32.77	1.54858e-12	1.30578e-13	1.06285e-12	4.5231e-14	1.41407e-12	2.58722e-13
		32.79	1.55118e-12	1.27185e-13	1.05909e-12	4.9286e-14	1.4132e-12	2.57602e-13
		32.81	1.55066e-12	1.27942e-13	1.05899e-12	4.68578e-14	1.40921e-12	2.56593e-13
		32.83	1.5478e-12	1.28484e-13	1.04799e-12	5.01861e-14	1.41098e-12	2.58544e-13
		32.85	1.54379e-12	1.3173e-13	1.04924e-12	4.91323e-14	1.41092e-12	2.57524e-13
		32.87	1.54234e-12	1.31405e-13	1.05811e-12	4.14954e-14	1.40994e-12	2.59801e-13
		32.89	1.53754e-12	1.32468e-13	1.05694e-12	4.44929e-14	1.40498e-12	2.59346e-13
		32.91	1.54638e-12	1.30803e-13	1.0679e-12	4.26985e-14	1.4127e-12	2.58844e-13
		32.93	1.53273e-12	1.32215e-13	1.04542e-12	4.43416e-14	1.40449e-12	2.5751e-13
		32.95	1.5322e-12	1.31424e-13	1.05662e-12	4.23768e-14	1.40959e-12	2.58438e-13
		32.97	1.53513e-12	1.30723e-13	1.04638e-12	4.50229e-14	1.4088e-12	2.58312e-13
		32.99	1.53374e-12	1.3538e-13	1.0481e-12	4.52657e-14	1.40729e-12	2.59455e-13
		33.01	1.53134e-12	1.33798e-13	1.0443e-12	4.15569e-14	1.40863e-12	2.56313e-13
		33.03	1.52844e-12	1.30702e-13	1.03779e-12	4.51065e-14	1.40601e-12	2.5786e-13
		33.05	1.52768e-12	1.30863e-13	1.03398e-12	4.53812e-14	1.40714e-12	2.5786e-13
		33.07	1.52591e-12	1.29369e-13	1.03788e-12	4.28967e-14	1.40927e-12	2.58937e-13
		33.09	1.52502e-12	1.33759e-13	1.03456e-12	4.66234e-14	1.40502e-12	2.57134e-13
		33.11	1.53141e-12	1.31093e-13	1.02211e-12	4.90213e-14	1.40727e-12	2.5767e-13
		33.13	1.52971e-12	1.27533e-13	1.03227e-12	4.61567e-14	1.40601e-12	2.57428e-13
		33.15	1.52169e-12	1.29269e-13	1.03199e-12	4.5439e-14	1.40308e-12	2.57576e-13
		33.17	1.52284e-12	1.30347e-13	1.03957e-12	4.32528e-14	1.40643e-12	2.57702e-13
		33.19	1.53095e-12	1.29437e-13	1.03386e-12	4.30156e-14	1.40204e-12	2.57043e-13
		33.21	1.52218e-12	1.2826e-13	1.02711e-12	4.33268e-14	1.40573e-12	2.56452e-13
		33.23	1.51544e-12	1.28751e-13	1.02303e-12	4.22633e-14	1.40509e-12	2.58007e-13
		33.25	1.51197e-12	1.30771e-13	1.02913e-12	4.14954e-14	1.39324e-12	2.56477e-13
		33.27	1.51054e-12	1.28785e-13	1.02081e-12	4.26019e-14	1.39726e-12	2.58379e-13
		33.29	1.51101e-12	1.30912e-13	1.01849e-12	4.45594e-14	1.40181e-12	2.59625e-13
		33.31	1.51285e-12	1.26447e-13	1.01559e-12	4.5091e-14	1.39657e-12	2.56462e-13
		33.33	1.5123e-12	1.28408e-13	1.02133e-12	4.42974e-14	1.40258e-12	2.58359e-13
		33.35	1.50599e-12	1.27506e-13	1.02287e-12	4.48223e-14	1.39712e-12	2.58001e-13
		33.37	1.50781e-12	1.31692e-13	1.01876e-12	4.92377e-14	1.39466e-12	2.59491e-13
		33.39	1.51023e-12	1.28996e-13	1.02495e-12	4.17417e-14	1.40247e-12	2.59531e-13
		33.41	1.50549e-12	1.28684e-13	1.02149e-12	4.65932e-14	1.39577e-12	2.57524e-13
		33.43	1.50772e-12	1.31529e-13	1.01391e-12	4.81304e-14	1.39506e-12	2.58107e-13
		33.45	1.50992e-12	1.28896e-13	1.01968e-12	4.35633e-14	1.395e-12	2.58582e-13
		33.47	1.50002e-12	1.29343e-13	1.02522e-12	3.95583e-14	1.39466e-12	2.58534e-13
		33.49	1.49867e-12	1.31396e-13	1.01968e-12	4.24054e-14	1.38944e-12	2.61308e-13
		33.51	1.49579e-12	1.32645e-13	1.01661e-12	4.07269e-14	1.39198e-12	2.6172e-13
		33.53	1.49951e-12	1.32988e-13	1.01739e-12	4.3389e-14	1.39084e-12	2.6084e-13
		33.55	1.50155e-12	1.28158e-13	1.02053e-12	4.36406e-14	1.39086e-12	2.59719e-13
		33.57	1.49372e-12	1.29915e-13	1.01672e-12	4.39868e-14	1.38582e-12	2.57811e-13
		33.59	1.49642e-12	1.28334e-13	1.00946e-12	4.63628e-14	1.38965e-12	2.57069e-13
		33.61	1.488e-12	1.34208e-13	1.0112e-12	4.68566e-14	1.39468e-12	2.61489e-13
		33.63	1.48528e-12	1.32787e-13	1.0116e-12	4.29466e-14	1.38521e-12	2.5545e-13
		33.65	1.47847e-12	1.32313e-13	1.00684e-12	4.19906e-14	1.38876e-12	2.60317e-13
		33.67	1.47517e-12	1.34971e-13	1.01621e-12	4.01838e-14	1.38782e-12	2.59781e-13
		33.69	1.47523e-12	1.37985e-13	1.01045e-12	4.57432e-14	1.3879e-12	2.5869e-13
		33.71	1.47901e-12	1.36378e-13	1.01323e-12	4.06753e-14	1.39078e-12	2.61218e-13
		33.73	1.48199e-12	1.33541e-13	1.00785e-12	4.46171e-14	1.38833e-12	2.57616e-13
		33.75	1.47686e-12	1.38041e-13	1.00654e-12	4.38641e-14	1.38834e-12	2.57025e-13
		33.77	1.47251e-12	1.34451e-13	1.02129e-12	4.02663e-14	1.38373e-12	2.60045e-13
		33.79	1.46691e-12	1.35943e-13	1.00197e-12	4.4954e-14	1.37941e-12	2.60976e-13
		33.81	1.46887e-12	1.35777e-13	1.01571e-12	4.54648e-14	1.37895e-12	2.60626e-13
		33.83	1.47432e-12	1.36993e-13	1.01634e-12	4.2627e-14	1.3823e-12	2.57799e-13
		33.85	1.47328e-12	1.34529e-13	1.00864e-12	4.91695e-14	1.38225e-12	2.60874e-13
		33.87	1.46927e-12	1.35349e-13	1.01666e-12	4.15554e-14	1.38016e-12	2.61769e-13
		33.89	1.46971e-12	1.34234e-13	1.00915e-12	4.39824e-14	1.37244e-12	2.62174e-13
		33.91	1.4634e-12	1.38314e-13	1.00266e-12	4.9689e-14	1.37376e-12	2.60051e-13
		33.93	1.46766e-12	1.36537e-13	1.00048e-12	5.14908e-14	1.38117e-12	2.60367e-13
		33.95	1.46179e-12	1.37585e-13	1.00867e-12	4.77816e-14	1.37378e-12	2.61145e-13
		33.97	1.46412e-12	1.37665e-13	1.0009e-12	4.63711e-14	1.37956e-12	2.62149e-13
		33.99	1.46669e-12	1.37906e-13	1.00289e-12	4.6337e-14	1.37074e-12	2.61944e-13
		34.01	1.454e-12	1.38052e-13	1.00854e-12	4.26659e-14	1.37516e-12	2.61427e-13
		34.03	1.4623e-12	1.38642e-13	1.00337e-12	4.29236e-14	1.37024e-12	2.59074e-13
		34.05	1.45625e-12	1.35924e-13	1.00161e-12	4.18832e-14	1.37032e-12	2.60768e-13
		34.07	1.45403e-12	1.36753e-13	9.97743e-13	4.28889e-14	1.37119e-12	2.59794e-13
		34.09	1.45629e-12	1.37222e-13	9.92457e-13	4.43706e-14	1.36368e-12	2.62993e-13
		34.11	1.45366e-12	1.35146e-13	1.00761e-12	4.18132e-14	1.36707e-12	2.61906e-13
		34.13	1.45845e-12	1.32495e-13	1.00742e-12	4.1541e-14	1.36477e-12	2.57698e-13
		34.15	1.44998e-12	1.34949e-13	1.00262e-12	4.31606e-14	1.36444e-12	2.59925e-13
		34.17	1.45226e-12	1.33601e-13	9.92047e-13	4.68317e-14	1.3649e-12	2.59861e-13
		34.19	1.45229e-12	1.37481e-13	1.00886e-12	3.66269e-14	1.35829e-12	2.6271e-13
		34.21	1.44809e-12	1.36258e-13	9.91615e-13	4.82666e-14	1.36041e-12	2.59313e-13
		34.23	1.44584e-12	1.35767e-13	9.91187e-13	5.05476e-14	1.35911e-12	2.61895e-13
		34.25	1.44527e-12	1.34535e-13	1.00053e-12	4.25974e-14	1.35939e-12	2.60047e-13
		34.27	1.45226e-12	1.32355e-13	1.00037e-12	4.09967e-14	1.3598e-12	2.61965e-13
		34.29	1.44225e-12	1.34168e-13	1.00413e-12	3.93936e-14	1.35519e-12	2.5875e-13
		34.31	1.44436e-12	1.33617e-13	1.01051e-12	3.97858e-14	1.36324e-12	2.59417e-13
		34.33	1.43778e-12	1.33852e-13	9.92455e-13	4.71656e-14	1.35846e-12	2.63017e-13
		34.35	1.44062e-12	1.33e-13	1.0054e-12	4.22408e-14	1.35797e-12	2.56557e-13
		34.37	1.43929e-12	1.33634e-13	9.86642e-13	4.67256e-14	1.3551e-12	2.57657e-13
		34.39	1.44113e-12	1.33112e-13	9.99758e-13	4.03594e-14	1.35237e-12	2.57696e-13
		34.41	1.43541e-12	1.35614e-13	9.90637e-13	4.28516e-14	1.35177e-12	2.58115e-13
		34.43	1.4329e-12	1.33832e-13	9.98384e-13	3.71693e-14	1.35573e-12	2.61039e-13
		34.45	1.42926e-12	1.34224e-13	9.97621e-13	4.11309e-14	1.35088e-12	2.60177e-13
		34.47	1.43217e-12	1.33083e-13	9.91757e-13	4.00374e-14	1.35056e-12	2.60314e-13
		34.49	1.43073e-12	1.35088e-13	9.90944e-13	3.86554e-14	1.34696e-12	2.59795e-13
		34.51	1.4277e-12	1.34931e-13	9.91633e-13	3.89837e-14	1.34403e-12	2.58546e-13
		34.53	1.43382e-12	1.31305e-13	9.79474e-13	4.38163e-14	1.34973e-12	2.60314e-13
		34.55	1.42711e-12	1.36119e-13	9.83908e-13	3.88035e-14	1.33985e-12	2.60894e-13
		34.57	1.42262e-12	1.33881e-13	9.75669e-13	4.2269e-14	1.34508e-12	2.62081e-13
		34.59	1.41821e-12	1.35324e-13	9.78234e-13	4.15717e-14	1.33795e-12	2.62333e-13
		34.61	1.41807e-12	1.35064e-13	9.76089e-13	3.95061e-14	1.33359e-12	2.60954e-13
		34.63	1.42189e-12	1.37206e-13	9.88499e-13	3.38792e-14	1.34235e-12	2.61646e-13
		34.65	1.41393e-12	1.36388e-13	9.71048e-13	4.16068e-14	1.34472e-12	2.60084e-13
		34.67	1.41607e-12	1.36494e-13	9.76093e-13	3.68712e-14	1.34095e-12	2.59671e-13
		34.69	1.41607e-12	1.39349e-13	9.72713e-13	3.81105e-14	1.33376e-12	2.61411e-13
		34.71	1.40974e-12	1.3876e-13	9.68665e-13	3.57956e-14	1.34136e-12	2.6028e-13
		34.73	1.41955e-12	1.36606e-13	9.69078e-13	3.54869e-14	1.33399e-12	2.61559e-13
		34.75	1.41518e-12	1.34178e-13	9.77594e-13	3.37105e-14	1.33774e-12	2.61538e-13
		34.77	1.41329e-12	1.37348e-13	9.78204e-13	2.99896e-14	1.34001e-12	2.60793e-13
		34.79	1.40997e-12	1.35138e-13	9.62365e-13	3.59694e-14	1.33435e-12	2.63815e-13
		34.81	1.40783e-12	1.34811e-13	9.73553e-13	3.68669e-14	1.33756e-12	2.60845e-13
		34.83	1.41023e-12	1.35892e-13	9.64308e-13	3.2937e-14	1.33737e-12	2.6316e-13
		34.85	1.41094e-12	1.35159e-13	9.71956e-13	2.61033e-14	1.34192e-12	2.64591e-13
		34.87	1.40652e-12	1.34597e-13	9.6071e-13	2.93244e-14	1.33931e-12	2.65821e-13
		34.89	1.4113e-12	1.3213e-13	9.63591e-13	3.17217e-14	1.3333e-12	2.64134e-13
		34.91	1.40465e-12	1.36598e-13	9.72528e-13	2.688e-14	1.3308e-12	2.6577e-13
		34.93	1.40347e-12	1.34999e-13	9.57431e-13	3.36226e-14	1.33396e-12	2.63663e-13
		34.95	1.40685e-12	1.3775e-13	9.57912e-13	3.13237e-14	1.32631e-12	2.67954e-13
		34.97	1.40313e-12	1.34974e-13	9.56018e-13	2.98555e-14	1.32724e-12	2.66427e-13
		34.99	1.40792e-12	1.35018e-13	9.61573e-13	2.59592e-14	1.32691e-12	2.65397e-13
		35.01	1.40015e-12	1.34543e-13	9.62385e-13	2.91357e-14	1.3271e-12	2.66844e-13
		35.03	1.40511e-12	1.35706e-13	9.53668e-13	2.78103e-14	1.33456e-12	2.64865e-13
		35.05	1.3983e-12	1.36503e-13	9.53092e-13	2.8088e-14	1.32419e-12	2.62893e-13
		35.07	1.39863e-12	1.35051e-13	9.54214e-13	2.1894e-14	1.32627e-12	2.66934e-13
		35.09	1.39809e-12	1.36139e-13	9.56692e-13	2.30058e-14	1.32405e-12	2.71335e-13
		35.11	1.39834e-12	1.35276e-13	9.57773e-13	1.78325e-14	1.32118e-12	2.68728e-13
		35.13	1.39666e-12	1.34051e-13	9.52501e-13	1.93433e-14	1.32252e-12	2.66708e-13
		35.15	1.39381e-12	1.34655e-13	9.47986e-13	2.22204e-14	1.32111e-12	2.69647e-13
		35.17	1.39481e-12	1.3574e-13	9.4536e-13	2.18481e-14	1.32085e-12	2.67958e-13
		35.19	1.39442e-12	1.35108e-13	9.36322e-13	2.32157e-14	1.31661e-12	2.6873e-13
		35.21	1.38354e-12	1.3496e-13	9.47323e-13	1.74826e-14	1.32159e-12	2.68623e-13
		35.23	1.3914e-12	1.34412e-13	9.45773e-13	2.02309e-14	1.31944e-12	2.67385e-13
		35.25	1.39002e-12	1.34333e-13	9.45905e-13	1.63307e-14	1.3161e-12	2.67625e-13
		35.27	1.38944e-12	1.34954e-13	9.33078e-13	2.45806e-14	1.31637e-12	2.70793e-13
		35.29	1.38816e-12	1.35239e-13	9.47284e-13	2.01759e-14	1.3179e-12	2.70636e-13
		35.31	1.39093e-12	1.32241e-13	9.4883e-13	1.80613e-14	1.31384e-12	2.69249e-13
		35.33	1.38761e-12	1.33686e-13	9.43913e-13	2.17794e-14	1.31773e-12	2.65755e-13
		35.35	1.38497e-12	1.36342e-13	9.46588e-13	1.90318e-14	1.31907e-12	2.68882e-13
		35.37	1.38233e-12	1.35494e-13	9.41073e-13	2.06393e-14	1.31333e-12	2.66662e-13
		35.39	1.38766e-12	1.36692e-13	9.39385e-13	1.59442e-14	1.31855e-12	2.66157e-13
		35.41	1.38548e-12	1.33094e-13	9.51194e-13	1.73784e-14	1.31315e-12	2.69337e-13
		35.43	1.38041e-12	1.34467e-13	9.4391e-13	2.13259e-14	1.31523e-12	2.64774e-13
		35.45	1.38044e-12	1.35543e-13	9.39611e-13	2.47036e-14	1.31205e-12	2.69105e-13
		35.47	1.37553e-12	1.37903e-13	9.38521e-13	1.67911e-14	1.30696e-12	2.67823e-13
		35.49	1.37111e-12	1.36157e-13	9.34961e-13	2.61118e-14	1.31433e-12	2.70859e-13
		35.51	1.37706e-12	1.3592e-13	9.35585e-13	2.56693e-14	1.30774e-12	2.69415e-13
		35.53	1.37426e-12	1.37052e-13	9.41086e-13	2.20757e-14	1.30194e-12	2.69255e-13
		35.55	1.37497e-12	1.35534e-13	9.41958e-13	1.91174e-14	1.30784e-12	2.70127e-13
		35.57	1.37282e-12	1.36706e-13	9.43519e-13	2.36166e-14	1.30904e-12	2.70587e-13
		35.59	1.38031e-12	1.3746e-13	9.43496e-13	2.76896e-14	1.31672e-12	2.64912e-13
		35.61	1.37191e-12	1.34712e-13	9.43533e-13	1.96563e-14	1.30669e-12	2.71145e-13
		35.63	1.3747e-12	1.36519e-13	9.44136e-13	2.15713e-14	1.3028e-12	2.68949e-13
		35.65	1.36874e-12	1.332e-13	9.39313e-13	2.28054e-14	1.30786e-12	2.7082e-13
		35.67	1.36982e-12	1.35254e-13	9.38528e-13	2.13979e-14	1.3008e-12	2.72021e-13
		35.69	1.37198e-12	1.36678e-13	9.51997e-13	1.96212e-14	1.30213e-12	2.70925e-13
		35.71	1.3686e-12	1.34755e-13	9.42832e-13	2.79597e-14	1.29818e-12	2.70064e-13
		35.73	1.36621e-12	1.33153e-13	9.4622e-13	2.49065e-14	1.29879e-12	2.70571e-13
		35.75	1.36534e-12	1.36971e-13	9.35443e-13	3.0025e-14	1.29684e-12	2.70925e-13
		35.77	1.36359e-12	1.35842e-13	9.425e-13	1.80378e-14	1.29721e-12	2.70685e-13
		35.79	1.35866e-12	1.35006e-13	9.50957e-13	2.39674e-14	1.30344e-12	2.71927e-13
		35.81	1.35773e-12	1.37188e-13	9.41095e-13	2.56419e-14	1.29953e-12	2.70534e-13
		35.83	1.3607e-12	1.36365e-13	9.46681e-13	2.38601e-14	1.30118e-12	2.68822e-13
		35.85	1.36191e-12	1.37133e-13	9.26806e-13	3.68354e-14	1.29845e-12	2.69171e-13
		35.87	1.3586e-12	1.37344e-13	9.41728e-13	2.13872e-14	1.29867e-12	2.70449e-13
		35.89	1.35983e-12	1.37305e-13	9.36559e-13	2.84213e-14	1.29837e-12	2.73407e-13
		35.91	1.36446e-12	1.35946e-13	9.32021e-13	2.78723e-14	1.29273e-12	2.73206e-13
		35.93	1.35749e-12	1.36972e-13	9.32635e-13	2.2826e-14	1.2958e-12	2.70546e-13
		35.95	1.35373e-12	1.35082e-13	9.31897e-13	3.04465e-14	1.29191e-12	2.69067e-13
		35.97	1.35522e-12	1.34693e-13	9.3254e-13	2.66829e-14	1.29126e-12	2.69809e-13
		35.99	1.35356e-12	1.34407e-13	9.16234e-13	3.17102e-14	1.28965e-12	2.70909e-13
		36.01	1.35139e-12	1.34898e-13	9.32798e-13	2.48354e-14	1.29284e-12	2.71718e-13
		36.03	1.35077e-12	1.34145e-13	9.35095e-13	2.23034e-14	1.29032e-12	2.68903e-13
		36.05	1.34279e-12	1.33228e-13	9.26211e-13	2.86861e-14	1.28666e-12	2.70375e-13
		36.07	1.34774e-12	1.36732e-13	9.20875e-13	3.06807e-14	1.29169e-12	2.71572e-13
		36.09	1.34734e-12	1.34609e-13	9.26789e-13	2.56088e-14	1.28072e-12	2.70114e-13
		36.11	1.34488e-12	1.35007e-13	9.33648e-13	2.35631e-14	1.28489e-12	2.72414e-13
		36.13	1.35096e-12	1.31519e-13	9.30263e-13	2.7304e-14	1.28563e-12	2.73593e-13
		36.15	1.34283e-12	1.35268e-13	9.22805e-13	2.12931e-14	1.28583e-12	2.68954e-13
		36.17	1.34713e-12	1.33005e-13	9.24279e-13	2.61943e-14	1.28101e-12	2.7249e-13
		36.19	1.33717e-12	1.34579e-13	9.24317e-13	2.88215e-14	1.27948e-12	2.74514e-13
		36.21	1.34165e-12	1.31896e-13	9.27931e-13	2.1487e-14	1.28048e-12	2.74146e-13
		36.23	1.34227e-12	1.33724e-13	9.24463e-13	2.66907e-14	1.28405e-12	2.71375e-13
		36.25	1.3336e-12	1.32695e-13	9.27074e-13	2.61029e-14	1.28126e-12	2.72984e-13
		36.27	1.34058e-12	1.32561e-13	9.33282e-13	2.30667e-14	1.28097e-12	2.70568e-13
		36.29	1.33173e-12	1.3651e-13	9.26713e-13	2.84208e-14	1.27901e-12	2.71037e-13
		36.31	1.33968e-12	1.30815e-13	9.288e-13	2.45906e-14	1.2746e-12	2.71759e-13
		36.33	1.34307e-12	1.31657e-13	9.16926e-13	3.10596e-14	1.27767e-12	2.70182e-13
		36.35	1.33715e-12	1.30582e-13	9.21751e-13	2.89442e-14	1.27859e-12	2.71602e-13
		36.37	1.33307e-12	1.33462e-13	9.22796e-13	2.56156e-14	1.27337e-12	2.717e-13
		36.39	1.32933e-12	1.31877e-13	9.23253e-13	2.72075e-14	1.2743e-12	2.73535e-13
		36.41	1.33385e-12	1.32906e-13	9.17829e-13	2.74404e-14	1.27348e-12	2.75138e-13
		36.43	1.33093e-12	1.31623e-13	9.28874e-13	2.37405e-14	1.27462e-12	2.72107e-13
		36.45	1.33087e-12	1.37531e-13	9.21326e-13	2.63448e-14	1.27399e-12	2.7552e-13
		36.47	1.33265e-12	1.33418e-13	9.13535e-13	3.35401e-14	1.27145e-12	2.7497e-13
		36.49	1.32837e-12	1.33789e-13	9.14576e-13	3.10628e-14	1.27165e-12	2.75112e-13
		36.51	1.32511e-12	1.33474e-13	9.33704e-13	2.25526e-14	1.26986e-12	2.75875e-13
		36.53	1.32685e-12	1.35352e-13	9.14343e-13	2.94843e-14	1.27072e-12	2.71432e-13
		36.55	1.32582e-12	1.3448e-13	9.17337e-13	2.97274e-14	1.27155e-12	2.72343e-13
		36.57	1.32478e-12	1.34851e-13	9.28142e-13	2.692e-14	1.26831e-12	2.74736e-13
		36.59	1.32362e-12	1.33631e-13	9.26364e-13	2.85672e-14	1.26984e-12	2.72276e-13
		36.61	1.32254e-12	1.3654e-13	9.09677e-13	3.09146e-14	1.26388e-12	2.73036e-13
		36.63	1.32149e-12	1.33395e-13	9.17754e-13	3.14504e-14	1.26726e-12	2.73864e-13
		36.65	1.3255e-12	1.33536e-13	9.21215e-13	2.94243e-14	1.26726e-12	2.7462e-13
		36.67	1.32426e-12	1.34676e-13	9.14983e-13	2.59206e-14	1.26508e-12	2.78263e-13
		36.69	1.32304e-12	1.35183e-13	9.12446e-13	2.9108e-14	1.26434e-12	2.73548e-13
		36.71	1.31862e-12	1.34122e-13	9.08189e-13	3.49745e-14	1.27034e-12	2.74543e-13
		36.73	1.32082e-12	1.35393e-13	9.05108e-13	3.59832e-14	1.26666e-12	2.72783e-13
		36.75	1.31952e-12	1.35103e-13	9.09836e-13	3.28126e-14	1.2663e-12	2.72441e-13
		36.77	1.31585e-12	1.34944e-13	9.23606e-13	2.34527e-14	1.26343e-12	2.74936e-13
		36.79	1.3171e-12	1.34562e-13	9.12114e-13	2.46741e-14	1.26071e-12	2.74232e-13
		36.81	1.31808e-12	1.34578e-13	9.13045e-13	3.08489e-14	1.26086e-12	2.73427e-13
		36.83	1.31581e-12	1.37026e-13	9.13059e-13	3.37694e-14	1.26335e-12	2.74858e-13
		36.85	1.30957e-12	1.35498e-13	9.08973e-13	2.99773e-14	1.26002e-12	2.69972e-13
		36.87	1.31468e-12	1.35683e-13	9.10159e-13	2.87016e-14	1.26355e-12	2.75916e-13
		36.89	1.31415e-12	1.36392e-13	9.1957e-13	2.22839e-14	1.25715e-12	2.73038e-13
		36.91	1.31315e-12	1.34208e-13	9.0622e-13	2.49694e-14	1.25823e-12	2.73318e-13
		36.93	1.3103e-12	1.35818e-13	9.04064e-13	2.52635e-14	1.25916e-12	2.72269e-13
		36.95	1.31322e-12	1.33529e-13	8.90317e-13	3.62985e-14	1.25272e-12	2.75697e-13
		36.97	1.30513e-12	1.36105e-13	8.99319e-13	2.61736e-14	1.25447e-12	2.74485e-13
		36.99	1.30764e-12	1.35614e-13	9.06284e-13	2.35586e-14	1.24986e-12	2.73174e-13
		37.01	1.30506e-12	1.34533e-13	8.86516e-13	3.36613e-14	1.2508e-12	2.75348e-13
		37.03	1.30803e-12	1.32338e-13	9.00998e-13	2.74295e-14	1.25115e-12	2.74429e-13
		37.05	1.3028e-12	1.32851e-13	9.0155e-13	2.56507e-14	1.25364e-12	2.73877e-13
		37.07	1.30396e-12	1.34308e-13	8.92464e-13	2.77849e-14	1.25387e-12	2.74632e-13
		37.09	1.311e-12	1.34555e-13	9.00457e-13	2.42314e-14	1.25014e-12	2.74502e-13
		37.11	1.30133e-12	1.3535e-13	9.07567e-13	2.14332e-14	1.24673e-12	2.75408e-13
		37.13	1.30596e-12	1.32747e-13	8.87084e-13	3.05253e-14	1.25088e-12	2.73347e-13
		37.15	1.30475e-12	1.35368e-13	8.89355e-13	2.64884e-14	1.24974e-12	2.76259e-13
		37.17	1.30093e-12	1.34018e-13	8.94004e-13	2.54555e-14	1.24869e-12	2.74541e-13
		37.19	1.301e-12	1.34671e-13	8.90199e-13	2.9965e-14	1.24918e-12	2.76147e-13
		37.21	1.29856e-12	1.34194e-13	8.85502e-13	2.8499e-14	1.24351e-12	2.758e-13
		37.23	1.2939e-12	1.34426e-13	8.95278e-13	2.25184e-14	1.24633e-12	2.77307e-13
		37.25	1.29277e-12	1.32151e-13	8.95821e-13	2.19906e-14	1.24714e-12	2.74849e-13
		37.27	1.29144e-12	1.32495e-13	8.92792e-13	2.01512e-14	1.24494e-12	2.75613e-13
		37.29	1.28945e-12	1.30749e-13	8.80727e-13	2.65406e-14	1.24534e-12	2.77079e-13
		37.31	1.28722e-12	1.30366e-13	8.88792e-13	2.30073e-14	1.24095e-12	2.75391e-13
		37.33	1.28791e-12	1.30488e-13	8.86277e-13	3.24602e-14	1.24359e-12	2.79818e-13
		37.35	1.28862e-12	1.31945e-13	8.82789e-13	2.94153e-14	1.24288e-12	2.75797e-13
		37.37	1.29323e-12	1.30041e-13	8.91371e-13	2.42511e-14	1.23568e-12	2.74013e-13
		37.39	1.27995e-12	1.3184e-13	8.86139e-13	2.32034e-14	1.234e-12	2.74921e-13
		37.41	1.28551e-12	1.30294e-13	8.8067e-13	2.78809e-14	1.23677e-12	2.76927e-13
		37.43	1.28868e-12	1.31528e-13	8.77274e-13	3.03401e-14	1.23487e-12	2.74727e-13
		37.45	1.28577e-12	1.34562e-13	8.93677e-13	2.01732e-14	1.23692e-12	2.76627e-13
		37.47	1.28259e-12	1.32372e-13	8.80085e-13	2.42533e-14	1.23572e-12	2.77298e-13
		37.49	1.28294e-12	1.32273e-13	8.80071e-13	2.03251e-14	1.2341e-12	2.78587e-13
		37.51	1.28184e-12	1.32272e-13	8.79545e-13	2.30178e-14	1.23985e-12	2.77984e-13
		37.53	1.27905e-12	1.31957e-13	8.74824e-13	2.49813e-14	1.2362e-12	2.74805e-13
		37.55	1.28003e-12	1.33152e-13	8.73691e-13	2.80558e-14	1.2342e-12	2.76232e-13
		37.57	1.28595e-12	1.31717e-13	8.824e-13	2.18752e-14	1.23325e-12	2.74258e-13
		37.59	1.2767e-12	1.32399e-13	8.82432e-13	2.50142e-14	1.22714e-12	2.7389e-13
		37.61	1.28365e-12	1.30283e-13	8.88807e-13	2.12167e-14	1.22984e-12	2.75315e-13
		37.63	1.2782e-12	1.33313e-13	8.83926e-13	2.09628e-14	1.22861e-12	2.7829e-13
		37.65	1.27431e-12	1.31558e-13	8.81522e-13	2.53574e-14	1.22945e-12	2.74009e-13
		37.67	1.27815e-12	1.32861e-13	8.87517e-13	1.94415e-14	1.22525e-12	2.77621e-13
		37.69	1.2748e-12	1.31189e-13	8.79125e-13	2.15805e-14	1.22514e-12	2.72294e-13
		37.71	1.26799e-12	1.322e-13	8.89482e-13	2.11641e-14	1.23003e-12	2.78476e-13
		37.73	1.26839e-12	1.32751e-13	8.77242e-13	2.43271e-14	1.22364e-12	2.75077e-13
		37.75	1.26742e-12	1.32336e-13	8.7554e-13	1.82158e-14	1.21925e-12	2.79348e-13
		37.77	1.26968e-12	1.34421e-13	8.81383e-13	1.87652e-14	1.22572e-12	2.76479e-13
		37.79	1.26956e-12	1.31379e-13	8.86837e-13	2.94957e-14	1.2243e-12	2.74335e-13
		37.81	1.26968e-12	1.33371e-13	8.81879e-13	3.26959e-14	1.2158e-12	2.78095e-13
		37.83	1.26168e-12	1.33855e-13	8.80618e-13	2.70181e-14	1.22145e-12	2.74801e-13
		37.85	1.26835e-12	1.31254e-13	8.79772e-13	2.99667e-14	1.2222e-12	2.75411e-13
		37.87	1.26485e-12	1.31062e-13	8.8058e-13	3.09261e-14	1.22464e-12	2.75067e-13
		37.89	1.26786e-12	1.30687e-13	8.78038e-13	3.03018e-14	1.2179e-12	2.73828e-13
		37.91	1.2661e-12	1.3393e-13	8.78583e-13	2.92728e-14	1.21996e-12	2.77003e-13
		37.93	1.26328e-12	1.35253e-13	8.79854e-13	2.9887e-14	1.22288e-12	2.77597e-13
		37.95	1.26501e-12	1.29448e-13	8.70386e-13	2.76523e-14	1.21605e-12	2.77212e-13
		37.97	1.26132e-12	1.31813e-13	8.71691e-13	2.59903e-14	1.21333e-12	2.77041e-13
		37.99	1.26243e-12	1.33987e-13	8.72741e-13	2.88134e-14	1.22003e-12	2.77006e-13
		38.01	1.25983e-12	1.33742e-13	8.74246e-13	3.10717e-14	1.22075e-12	2.76597e-13
		38.03	1.25655e-12	1.33515e-13	8.65159e-13	3.56242e-14	1.21863e-12	2.76536e-13
		38.05	1.25656e-12	1.33967e-13	8.68215e-13	3.01534e-14	1.2144e-12	2.76486e-13
		38.07	1.25385e-12	1.32663e-13	8.67439e-13	3.28855e-14	1.21744e-12	2.75096e-13
		38.09	1.2568e-12	1.31036e-13	8.68597e-13	2.71654e-14	1.22019e-12	2.77229e-13
		38.11	1.25056e-12	1.3341e-13	8.64894e-13	3.45224e-14	1.21707e-12	2.74781e-13
		38.13	1.25498e-12	1.30213e-13	8.62761e-13	3.73566e-14	1.21359e-12	2.76416e-13
		38.15	1.26541e-12	1.27713e-13	8.65244e-13	3.27846e-14	1.21744e-12	2.74928e-13
		38.17	1.25263e-12	1.33404e-13	8.67973e-13	3.05277e-14	1.21725e-12	2.76278e-13
		38.19	1.24962e-12	1.32051e-13	8.68548e-13	2.96469e-14	1.21764e-12	2.70181e-13
		38.21	1.25656e-12	1.32203e-13	8.66237e-13	2.71902e-14	1.21227e-12	2.74822e-13
		38.23	1.25009e-12	1.30014e-13	8.62196e-13	3.39845e-14	1.21403e-12	2.75238e-13
		38.25	1.2489e-12	1.30984e-13	8.57412e-13	3.32417e-14	1.2169e-12	2.74604e-13
		38.27	1.24361e-12	1.34258e-13	8.6259e-13	3.59798e-14	1.21039e-12	2.76251e-13
		38.29	1.23851e-12	1.30218e-13	8.61107e-13	3.28561e-14	1.21619e-12	2.72501e-13
		38.31	1.24165e-12	1.30952e-13	8.60499e-13	2.77457e-14	1.21474e-12	2.75733e-13
		38.33	1.24468e-12	1.26984e-13	8.61903e-13	3.66956e-14	1.21814e-12	2.73813e-13
		38.35	1.23844e-12	1.29622e-13	8.53932e-13	3.30373e-14	1.20963e-12	2.75183e-13
		38.37	1.2372e-12	1.30307e-13	8.60623e-13	3.50096e-14	1.21096e-12	2.73667e-13
		38.39	1.2424e-12	1.32095e-13	8.62594e-13	2.9658e-14	1.21235e-12	2.72945e-13
		38.41	1.24155e-12	1.28567e-13	8.58005e-13	3.15432e-14	1.21451e-12	2.74653e-13
		38.43	1.23826e-12	1.31387e-13	8.58987e-13	3.02336e-14	1.2066e-12	2.72674e-13
		38.45	1.24358e-12	1.28956e-13	8.61973e-13	2.82286e-14	1.20719e-12	2.74962e-13
		38.47	1.23705e-12	1.31426e-13	8.52542e-13	3.62556e-14	1.20762e-12	2.72107e-13
		38.49	1.24109e-12	1.30877e-13	8.58707e-13	3.21329e-14	1.2105e-12	2.71775e-13
		38.51	1.23533e-12	1.31741e-13	8.59955e-13	3.32094e-14	1.20871e-12	2.75064e-13
		38.53	1.23285e-12	1.33871e-13	8.59837e-13	3.29103e-14	1.20726e-12	2.76327e-13
		38.55	1.23709e-12	1.30753e-13	8.52069e-13	3.56215e-14	1.20522e-12	2.74985e-13
		38.57	1.22546e-12	1.32125e-13	8.54709e-13	3.65692e-14	1.20205e-12	2.71604e-13
		38.59	1.23206e-12	1.28725e-13	8.47665e-13	3.68083e-14	1.20424e-12	2.72308e-13
		38.61	1.22827e-12	1.28452e-13	8.55136e-13	3.81296e-14	1.20231e-12	2.75051e-13
		38.63	1.22675e-12	1.30222e-13	8.43063e-13	3.37648e-14	1.20125e-12	2.7529e-13
		38.65	1.2269e-12	1.30398e-13	8.35861e-13	3.61943e-14	1.20411e-12	2.74026e-13
		38.67	1.22725e-12	1.31986e-13	8.45217e-13	4.06198e-14	1.20508e-12	2.7255e-13
		38.69	1.22546e-12	1.31923e-13	8.43593e-13	3.25917e-14	1.20119e-12	2.72793e-13
		38.71	1.22646e-12	1.31289e-13	8.44437e-13	3.82119e-14	1.1994e-12	2.73022e-13
		38.73	1.22868e-12	1.29241e-13	8.45645e-13	3.70545e-14	1.19615e-12	2.73937e-13
		38.75	1.22898e-12	1.29828e-13	8.36279e-13	3.96512e-14	1.19204e-12	2.76952e-13
		38.77	1.22621e-12	1.3131e-13	8.37824e-13	3.81162e-14	1.19487e-12	2.76669e-13
		38.79	1.22394e-12	1.31368e-13	8.37024e-13	3.85232e-14	1.2004e-12	2.75067e-13
		38.81	1.22035e-12	1.31823e-13	8.29068e-13	3.94771e-14	1.1969e-12	2.73934e-13
		38.83	1.21722e-12	1.30662e-13	8.34373e-13	4.4861e-14	1.19589e-12	2.73954e-13
		38.85	1.21312e-12	1.28958e-13	8.38183e-13	4.55225e-14	1.19075e-12	2.76353e-13
		38.87	1.21942e-12	1.30445e-13	8.31892e-13	4.0866e-14	1.19451e-12	2.75989e-13
		38.89	1.21938e-12	1.28289e-13	8.28436e-13	3.71562e-14	1.19208e-12	2.73419e-13
		38.91	1.21417e-12	1.29156e-13	8.24867e-13	3.94309e-14	1.1879e-12	2.75637e-13
		38.93	1.21469e-12	1.31713e-13	8.29003e-13	3.68971e-14	1.18757e-12	2.74716e-13
		38.95	1.2157e-12	1.31815e-13	8.28501e-13	4.18546e-14	1.18764e-12	2.74344e-13
		38.97	1.21636e-12	1.31001e-13	8.30991e-13	3.71612e-14	1.18398e-12	2.74438e-13
		38.99	1.21863e-12	1.3028e-13	8.31787e-13	4.22456e-14	1.18652e-12	2.74094e-13
		39.01	1.21787e-12	1.30998e-13	8.32433e-13	3.91072e-14	1.18158e-12	2.76353e-13
		39.03	1.21672e-12	1.31422e-13	8.27858e-13	4.02443e-14	1.18358e-12	2.75219e-13
		39.05	1.22204e-12	1.30072e-13	8.26774e-13	3.89745e-14	1.17755e-12	2.72987e-13
		39.07	1.21378e-12	1.31112e-13	8.24088e-13	3.55638e-14	1.18782e-12	2.73168e-13
		39.09	1.21621e-12	1.32676e-13	8.23538e-13	4.39005e-14	1.18374e-12	2.73253e-13
		39.11	1.21689e-12	1.32608e-13	8.22705e-13	3.97289e-14	1.18162e-12	2.77756e-13
		39.13	1.21661e-12	1.34124e-13	8.24424e-13	4.0855e-14	1.1833e-12	2.7158e-13
		39.15	1.21727e-12	1.33472e-13	8.23661e-13	4.00058e-14	1.17927e-12	2.73673e-13
		39.17	1.21628e-12	1.34708e-13	8.16592e-13	4.431e-14	1.18262e-12	2.75317e-13
		39.19	1.21692e-12	1.34467e-13	8.27337e-13	3.73919e-14	1.17928e-12	2.75089e-13
		39.21	1.21159e-12	1.32793e-13	8.23123e-13	3.55487e-14	1.17845e-12	2.73495e-13
		39.23	1.21259e-12	1.3221e-13	8.15038e-13	3.7226e-14	1.17779e-12	2.74341e-13
		39.25	1.21295e-12	1.32848e-13	8.24945e-13	3.79737e-14	1.1723e-12	2.74578e-13
		39.27	1.2121e-12	1.31e-13	8.26476e-13	3.55369e-14	1.17484e-12	2.72513e-13
		39.29	1.21039e-12	1.30947e-13	8.27533e-13	4.05254e-14	1.1701e-12	2.73891e-13
		39.31	1.20709e-12	1.33974e-13	8.19501e-13	4.36257e-14	1.17184e-12	2.71566e-13
		39.33	1.20538e-12	1.32679e-13	8.18151e-13	3.76782e-14	1.17499e-12	2.69596e-13
		39.35	1.20434e-12	1.30034e-13	8.1456e-13	4.20111e-14	1.17507e-12	2.7403e-13
		39.37	1.19691e-12	1.24404e-13	8.18469e-13	4.1753e-14	1.17362e-12	2.71782e-13
		39.39	1.18942e-12	1.23387e-13	8.13694e-13	3.92608e-14	1.1668e-12	2.66697e-13
		39.41	1.18355e-12	1.2303e-13	8.18961e-13	3.61023e-14	1.17461e-12	2.72209e-13
		39.43	1.18449e-12	1.20022e-13	8.17298e-13	3.79061e-14	1.17128e-12	2.70231e-13
		39.45	1.1797e-12	1.25423e-13	8.22024e-13	3.48585e-14	1.16836e-12	2.69652e-13
		39.47	1.18356e-12	1.24068e-13	8.12689e-13	4.07074e-14	1.17573e-12	2.71173e-13
		39.49	1.18052e-12	1.21914e-13	8.16524e-13	4.12103e-14	1.17105e-12	2.74823e-13
		39.51	1.1779e-12	1.21939e-13	8.16457e-13	4.01269e-14	1.16608e-12	2.73167e-13
		39.53	1.17788e-12	1.2149e-13	8.15332e-13	4.15342e-14	1.17119e-12	2.73324e-13
		39.55	1.18408e-12	1.20675e-13	8.1349e-13	3.61675e-14	1.16572e-12	2.73946e-13
		39.57	1.17972e-12	1.23244e-13	8.16211e-13	3.81289e-14	1.16568e-12	2.70494e-13
		39.59	1.18054e-12	1.22933e-13	8.13103e-13	3.58216e-14	1.17073e-12	2.7255e-13
		39.61	1.17878e-12	1.23761e-13	8.07424e-13	4.01328e-14	1.16856e-12	2.73268e-13
		39.63	1.17516e-12	1.22684e-13	8.07115e-13	4.09449e-14	1.16878e-12	2.69667e-13
		39.65	1.18202e-12	1.23523e-13	8.11236e-13	3.73053e-14	1.16677e-12	2.7102e-13
		39.67	1.17682e-12	1.23004e-13	8.05032e-13	3.8823e-14	1.16693e-12	2.70684e-13
		39.69	1.17673e-12	1.24963e-13	8.04685e-13	3.8472e-14	1.16731e-12	2.69968e-13
		39.71	1.17258e-12	1.22774e-13	7.99212e-13	4.11272e-14	1.15513e-12	2.70884e-13
		39.73	1.17205e-12	1.21881e-13	8.03169e-13	4.13615e-14	1.16229e-12	2.74329e-13
		39.75	1.17384e-12	1.20625e-13	8.01816e-13	4.42143e-14	1.1587e-12	2.71555e-13
		39.77	1.1709e-12	1.21705e-13	7.9594e-13	4.49567e-14	1.1626e-12	2.72121e-13
		39.79	1.17271e-12	1.2157e-13	8.04324e-13	3.96173e-14	1.15913e-12	2.73155e-13
		39.81	1.17e-12	1.23131e-13	7.94187e-13	4.0272e-14	1.16019e-12	2.75721e-13
		39.83	1.17088e-12	1.21116e-13	7.99622e-13	4.00661e-14	1.15565e-12	2.72577e-13
		39.85	1.1688e-12	1.19382e-13	7.91318e-13	4.26686e-14	1.16094e-12	2.72271e-13
		39.87	1.17256e-12	1.21908e-13	7.95766e-13	4.12569e-14	1.15428e-12	2.73698e-13
		39.89	1.1705e-12	1.2198e-13	7.92341e-13	4.53608e-14	1.16039e-12	2.73195e-13
		39.91	1.17315e-12	1.22905e-13	7.93801e-13	4.28115e-14	1.1557e-12	2.7299e-13
[truncated: 2,967 more rows]

## Sheet: 20 ms x 10_10Hz
		Figure 3C_Cm traces									Figure 3C_10 Hz_endo-rate_bar graph data
		Time (S)	Control		ML141		Latrunculin-B					Control	ML141	Latrunculin-B
			Mean	SEM	Mean	SEM	Mean	SEM			Mean	3.46e-13	2.42e-13	3.5e-13
											SEM	4.01e-14	2.15e-14	3.33e-14
		0.01	1.92719e-14	1.88426e-14	-1.69827e-14	2.93445e-14	2.49142e-14	1.61259e-14			n number	6	4	5
		0.02	1.40946e-14	6.26486e-15	-1.93954e-14	3.20737e-14	2.57393e-14	1.4533e-14			p-value		0.08	0.953
		0.03	1.74512e-14	4.05401e-15	-5.19597e-15	3.09825e-14	2.87101e-14	1.40035e-14
		0.04	1.66529e-14	5.26545e-15	-1.7166e-14	3.04084e-14	2.48863e-14	1.15213e-14
		0.05	2.13604e-14	5.85522e-15	-2.27801e-14	2.73225e-14	2.14119e-14	1.31742e-14
		0.06	1.70516e-14	5.69538e-15	-8.95922e-15	3.07646e-14	2.33398e-14	1.26611e-14
		0.07	1.88374e-14	3.00933e-15	-7.66526e-15	3.45592e-14	2.42351e-14	1.2257e-14
		0.08	2.36293e-14	6.62736e-15	-1.34484e-15	3.21555e-14	2.74914e-14	1.07083e-14
		0.09	1.30067e-14	4.16451e-15	-9.09004e-15	2.80746e-14	2.83234e-14	1.10261e-14
		0.1	1.6119e-14	6.1116e-15	-1.87467e-14	2.42109e-14	2.27978e-14	1.25418e-14
		0.11	1.88384e-14	6.37874e-15	-1.18432e-15	3.06177e-14	2.5963e-14	1.28986e-14
		0.12	2.36654e-14	4.78894e-15	-3.48019e-15	2.94976e-14	2.55363e-14	1.21159e-14
		0.13	1.68302e-14	5.01408e-15	-2.31881e-14	2.58998e-14	2.62853e-14	1.1302e-14
		0.14	1.60719e-14	6.29865e-15	-4.74489e-15	2.70397e-14	2.60191e-14	8.38567e-15
		0.15	1.42296e-14	5.57484e-15	-7.5314e-15	1.88009e-14	2.15976e-14	1.26288e-14
		0.16	1.42999e-14	4.68106e-15	-1.161e-14	2.30789e-14	2.48815e-14	1.50969e-14
		0.17	1.81861e-14	3.7512e-15	-2.24045e-15	2.59184e-14	2.58703e-14	1.56144e-14
		0.18	1.74521e-14	3.84906e-15	4.26289e-16	3.00442e-14	2.31397e-14	1.29694e-14
		0.19	1.9257e-14	3.34163e-15	-6.07648e-15	2.53784e-14	2.31673e-14	1.50048e-14
		0.2	1.86649e-14	7.77653e-15	-4.52923e-15	2.5378e-14	1.87075e-14	1.24472e-14
		0.21	1.53655e-14	4.12575e-15	-6.39164e-15	2.65358e-14	2.18134e-14	9.7197e-15
		0.22	1.60457e-14	3.4239e-15	-2.61116e-15	2.70344e-14	2.57514e-14	1.1664e-14
		0.23	2.02959e-14	4.3081e-15	6.26702e-16	2.52455e-14	2.04154e-14	1.42199e-14
		0.24	1.37751e-14	8.73631e-15	-7.43869e-15	2.40769e-14	1.28732e-14	1.16999e-14
		0.25	2.14423e-14	6.18028e-15	-3.76374e-15	2.58536e-14	1.52885e-14	9.732e-15
		0.26	1.88025e-14	4.51742e-15	-3.21053e-15	2.51085e-14	1.45622e-14	9.71432e-15
		0.27	1.77252e-14	4.57153e-15	-7.40226e-15	2.5087e-14	2.01636e-14	1.22254e-14
		0.28	1.65588e-14	5.45018e-15	-2.44655e-15	2.21694e-14	2.30549e-14	1.1697e-14
		0.29	1.72505e-14	5.20163e-15	-8.93581e-15	2.10185e-14	2.07613e-14	1.21595e-14
		0.3	1.26706e-14	6.40583e-15	-1.34111e-14	2.12516e-14	1.64785e-14	9.30465e-15
		0.31	9.70368e-15	5.20556e-15	-5.31005e-15	2.22515e-14	1.86066e-14	1.00312e-14
		0.32	1.94467e-14	4.453e-15	-7.87226e-15	1.86817e-14	1.77104e-14	9.52854e-15
		0.33	1.21909e-14	4.03312e-15	-7.67619e-15	2.05897e-14	1.93219e-14	1.21806e-14
		0.34	1.36302e-14	5.39796e-15	-7.50468e-15	2.42146e-14	2.04336e-14	8.99349e-15
		0.35	1.49904e-14	4.29783e-15	-3.50985e-15	2.12657e-14	1.43749e-14	8.16317e-15
		0.36	1.70349e-14	5.87685e-15	-1.28429e-14	1.83731e-14	1.96078e-14	9.03009e-15
		0.37	1.53579e-14	5.8911e-15	-1.13497e-14	1.74038e-14	1.35383e-14	6.61014e-15
		0.38	1.50519e-14	5.41741e-15	-4.49241e-15	1.82965e-14	1.42961e-14	8.4978e-15
		0.39	1.36562e-14	3.31804e-15	-9.89353e-15	1.6318e-14	1.37529e-14	5.63092e-15
		0.4	7.96243e-15	4.93887e-15	-2.16409e-14	1.72157e-14	1.41545e-14	7.8155e-15
		0.41	1.57958e-14	4.58019e-15	-7.70152e-15	1.85335e-14	1.26312e-14	6.47536e-15
		0.42	1.47171e-14	4.94755e-15	-8.5842e-15	1.40669e-14	1.07974e-14	5.66619e-15
		0.43	1.37007e-14	6.32348e-15	-1.89409e-15	1.35908e-14	1.17899e-14	5.72865e-15
		0.44	1.53739e-14	5.23541e-15	8.30552e-15	1.78547e-14	8.96395e-15	5.76043e-15
		0.45	1.17857e-14	4.65282e-15	-4.79767e-15	1.70859e-14	7.68973e-15	3.95807e-15
		0.46	1.39408e-14	5.79757e-15	2.11927e-15	1.9551e-14	6.92262e-15	2.23109e-15
		0.47	1.19486e-14	5.63571e-15	1.89743e-15	1.52464e-14	9.93157e-15	3.38204e-15
		0.48	1.36401e-14	6.08699e-15	-1.21351e-14	1.31469e-14	1.04625e-14	3.74459e-15
		0.49	1.04844e-14	5.84522e-15	-1.11435e-14	1.5638e-14	8.92842e-15	1.83332e-15
		0.5	1.24797e-14	6.51395e-15	-2.98665e-15	9.79682e-15	1.01097e-14	4.1019e-15
		0.51	1.09858e-14	5.41542e-15	-1.47848e-15	1.39151e-14	5.96174e-15	3.7534e-15
		0.52	7.67402e-15	4.31697e-15	-3.41592e-15	1.1167e-14	1.05792e-14	3.71191e-15
		0.53	1.55221e-14	6.83475e-15	1.1052e-15	1.70483e-14	1.26814e-14	4.08768e-15
		0.54	5.7188e-15	6.48598e-15	-1.01139e-15	1.15602e-14	1.16102e-14	4.26725e-15
		0.55	9.39228e-15	5.12488e-15	3.04036e-15	1.34874e-14	6.05986e-15	2.50042e-15
		0.56	1.19258e-14	6.62678e-15	1.08648e-14	1.90227e-14	8.06388e-15	3.62415e-15
		0.57	7.75487e-15	5.99115e-15	-2.98371e-15	1.41068e-14	9.74453e-15	3.20186e-15
		0.58	4.93777e-15	6.26061e-15	-1.02159e-14	1.56084e-14	9.55134e-15	2.62567e-15
		0.59	1.04307e-14	5.53734e-15	-1.52899e-15	1.35346e-14	9.49292e-15	2.85851e-15
		0.6	9.41483e-15	4.90516e-15	-7.99185e-15	1.31209e-14	9.11969e-15	5.11778e-15
		0.61	1.26128e-14	5.53477e-15	-7.64263e-15	1.86284e-14	1.32349e-14	6.17776e-15
		0.62	1.04098e-14	9.35454e-15	3.48177e-15	1.97037e-14	6.02204e-15	2.37872e-15
		0.63	1.47266e-14	5.72663e-15	-4.39399e-15	2.07755e-14	3.72319e-15	3.91736e-15
		0.64	7.63359e-15	6.56135e-15	-4.15968e-15	1.28889e-14	2.81042e-15	2.78608e-15
		0.65	9.67706e-15	5.40046e-15	-1.05063e-14	1.57856e-14	-3.07317e-15	2.74233e-15
		0.66	1.53402e-14	4.80267e-15	-8.40426e-15	1.60464e-14	3.73115e-15	3.38766e-15
		0.67	1.36316e-14	6.2104e-15	-1.41469e-15	1.80602e-14	4.86282e-15	3.30283e-15
		0.68	1.40558e-14	6.70484e-15	-9.35999e-15	1.7409e-14	2.98568e-15	3.74957e-15
		0.69	1.03586e-14	6.31401e-15	-2.76853e-15	1.44405e-14	-3.26696e-16	6.52978e-15
		0.7	1.33088e-14	5.4863e-15	-6.79301e-15	2.36068e-14	-7.09501e-15	8.80259e-15
		0.71	7.11194e-15	6.40756e-15	-7.5788e-15	1.62636e-14	7.45532e-16	8.27994e-15
		0.72	7.63537e-15	5.64866e-15	-1.01171e-14	2.07601e-14	-1.51576e-15	4.44041e-15
		0.73	9.24894e-15	8.10315e-15	-1.33972e-14	1.67382e-14	-3.99428e-15	7.13107e-15
		0.74	9.44757e-15	6.34998e-15	-1.32325e-14	1.87697e-14	1.3466e-15	7.84829e-15
		0.75	9.21248e-15	7.13406e-15	-3.54491e-15	1.97327e-14	-4.43992e-15	6.24466e-15
		0.76	8.49986e-15	5.64505e-15	-5.99352e-15	2.47813e-14	-6.91126e-15	6.13925e-15
		0.77	1.17223e-14	4.68369e-15	-9.89009e-15	1.6618e-14	-4.22693e-15	4.71259e-15
		0.78	7.75943e-15	4.31094e-15	9.80579e-16	1.76195e-14	-2.24947e-15	6.89482e-15
		0.79	1.33162e-14	8.056e-15	-1.45391e-15	1.74547e-14	-3.70377e-15	6.5893e-15
		0.8	1.46304e-14	9.50474e-15	-8.37497e-16	1.93604e-14	-2.68571e-15	8.05481e-15
		0.81	9.37016e-15	6.43961e-15	5.17149e-15	2.31208e-14	-1.21913e-15	7.10945e-15
		0.82	9.72093e-15	5.50529e-15	5.28391e-16	1.85579e-14	-4.361e-16	6.11556e-15
		0.83	1.35637e-14	5.27266e-15	-1.09299e-14	1.65486e-14	-6.64734e-16	5.9641e-15
		0.84	4.98745e-15	7.65329e-15	-3.649e-15	1.75316e-14	-1.51292e-15	6.29826e-15
		0.85	9.60612e-15	5.65892e-15	-3.37123e-15	2.1069e-14	-3.27702e-15	6.40809e-15
		0.86	6.82213e-15	5.47256e-15	-5.64262e-15	1.56414e-14	-5.84107e-15	8.20442e-15
		0.87	1.11415e-14	7.10681e-15	-7.43056e-15	1.65505e-14	-4.41476e-15	9.53598e-15
		0.88	1.48832e-14	5.14326e-15	4.24062e-15	2.06882e-14	-2.23504e-15	5.81774e-15
		0.89	5.6496e-15	5.44551e-15	-9.95741e-15	1.67966e-14	5.30132e-16	5.53879e-15
		0.9	8.94982e-15	7.05678e-15	-3.33883e-15	1.74318e-14	2.59734e-15	7.88249e-15
		0.91	1.28902e-14	4.50355e-15	5.28267e-15	1.89405e-14	4.21968e-16	8.04434e-15
		0.92	1.90609e-14	7.23601e-15	-7.08956e-15	1.82174e-14	-1.61451e-15	6.84057e-15
		0.93	1.02325e-14	6.50838e-15	-2.70591e-15	1.15122e-14	6.87431e-18	8.13165e-15
		0.94	1.0974e-14	6.97712e-15	-4.52348e-15	1.5481e-14	2.14589e-15	7.70792e-15
		0.95	1.36449e-14	6.36182e-15	-1.30043e-14	1.35318e-14	-6.87054e-15	7.96971e-15
		0.96	9.07961e-15	6.35076e-15	-7.89541e-15	1.48694e-14	-2.37416e-16	6.1702e-15
		0.97	5.64377e-15	5.56904e-15	-4.1456e-15	1.45658e-14	-3.75328e-15	4.88837e-15
		0.98	5.18089e-15	6.21594e-15	-4.50693e-15	1.80483e-14	7.86673e-16	6.1168e-15
		0.99	9.58937e-15	4.20981e-15	-7.60333e-15	1.08e-14	-3.09908e-15	7.78999e-15
		1	7.35353e-15	6.36774e-15	-8.29137e-15	1.43456e-14	2.97458e-15	6.17232e-15
		1.01	8.52093e-15	5.20203e-15	-6.16757e-15	1.66807e-14	9.91037e-16	4.82651e-15
		1.02	6.01654e-15	3.93422e-15	-1.143e-14	1.58716e-14	5.27194e-15	5.73907e-15
		1.03	8.77279e-15	5.62412e-15	-1.43087e-14	1.51677e-14	3.26659e-15	3.5825e-15
		1.04	1.16368e-14	4.6487e-15	-5.67718e-15	1.63848e-14	3.4039e-15	4.95175e-15
		1.05	8.38704e-15	5.60802e-15	6.28039e-15	2.12975e-14	4.526e-15	8.38375e-15
		1.06	1.13564e-14	7.85395e-15	1.47264e-15	2.0575e-14	-3.33131e-15	7.31725e-15
		1.07	1.06149e-14	4.83164e-15	-1.28523e-14	1.92851e-14	2.22019e-15	8.98215e-15
		1.08	3.10706e-15	7.83255e-15	-8.82414e-15	2.106e-14	5.26315e-15	1.17509e-14
		1.09	2.48731e-15	5.37182e-15	-1.39651e-14	1.99316e-14	3.55438e-15	9.37104e-15
		1.1	9.43674e-15	3.94037e-15	-1.59984e-14	2.18001e-14	7.30483e-16	1.03118e-14
		1.11	7.64677e-15	3.97895e-15	-1.13515e-14	1.93736e-14	-3.43289e-15	6.62769e-15
		1.12	2.9029e-15	5.05258e-15	-6.44681e-15	2.03144e-14	4.60278e-16	7.51904e-15
		1.13	1.28398e-14	3.15733e-15	-1.27302e-14	2.20942e-14	3.18991e-15	7.92301e-15
		1.14	2.69897e-15	5.33963e-15	-1.07118e-14	1.9517e-14	-1.68881e-15	6.65191e-15
		1.15	4.90056e-15	4.26704e-15	9.49076e-15	2.54647e-14	1.27933e-15	8.59502e-15
		1.16	8.5734e-15	5.79438e-15	-1.02686e-14	2.22035e-14	4.36566e-15	7.94081e-15
		1.17	1.13089e-14	7.89911e-15	-1.48153e-16	2.20111e-14	7.66622e-16	1.01039e-14
		1.18	5.01574e-15	6.1956e-15	-5.63054e-15	2.15812e-14	1.62882e-15	5.98549e-15
		1.19	6.69677e-15	4.08855e-15	1.47563e-15	2.15786e-14	1.95041e-15	8.23171e-15
		1.2	1.01889e-14	4.16567e-15	-3.11286e-15	1.96521e-14	3.00578e-15	7.54122e-15
		1.21	6.2992e-15	5.6028e-15	-4.6948e-16	2.15638e-14	-1.17834e-16	8.58538e-15
		1.22	4.49247e-15	6.93399e-15	-3.61038e-15	2.13746e-14	3.73017e-15	8.04436e-15
		1.23	6.31188e-15	5.03046e-15	5.37458e-15	2.34624e-14	9.68115e-15	7.73627e-15
		1.24	7.94974e-15	5.32521e-15	-1.03023e-14	1.52269e-14	2.741e-15	6.97401e-15
		1.25	1.56128e-14	5.15229e-15	-8.82187e-15	1.72292e-14	1.8049e-15	8.72368e-15
		1.26	9.66275e-15	3.73723e-15	-6.12769e-15	1.96221e-14	7.98286e-15	7.21527e-15
		1.27	8.75997e-15	4.0428e-15	-8.46859e-15	1.71534e-14	5.05882e-15	5.7189e-15
		1.28	1.40872e-14	6.53647e-15	-3.95854e-15	1.44704e-14	5.96313e-15	8.84771e-15
		1.29	6.36781e-15	5.8943e-15	-7.29401e-15	1.95699e-14	-4.17587e-16	8.95146e-15
		1.3	1.11587e-14	5.74227e-15	5.08573e-15	1.75093e-14	2.90585e-15	6.35198e-15
		1.31	1.2763e-14	6.49823e-15	-7.8351e-15	1.84536e-14	3.65948e-15	7.95466e-15
		1.32	1.09442e-14	8.37084e-15	-1.03838e-14	1.66643e-14	6.33565e-15	8.08198e-15
		1.33	1.04109e-14	7.59307e-15	-9.77214e-15	1.56091e-14	6.65275e-15	5.79188e-15
		1.34	1.07843e-14	5.00348e-15	-8.95458e-15	1.77342e-14	3.682e-15	8.91985e-15
		1.35	9.69732e-15	5.82328e-15	-8.0628e-15	1.92726e-14	6.05512e-15	7.57969e-15
		1.36	1.01389e-14	5.77511e-15	-6.21863e-15	1.69994e-14	3.58702e-15	8.3493e-15
		1.37	1.13434e-14	6.13405e-15	-5.72922e-15	1.37494e-14	2.83501e-15	9.09634e-15
		1.38	1.19984e-14	6.18131e-15	-1.13474e-14	1.4661e-14	1.95923e-15	1.0308e-14
		1.39	1.01618e-14	4.65146e-15	-3.33343e-15	1.53241e-14	3.61458e-15	7.12379e-15
		1.4	1.39591e-14	5.92151e-15	-1.1828e-14	1.59562e-14	7.4704e-15	6.33864e-15
		1.41	9.14743e-15	6.97656e-15	-2.96038e-16	1.92714e-14	5.45776e-15	8.87748e-15
		1.42	1.54759e-14	4.7567e-15	-4.76977e-15	1.63716e-14	2.89427e-15	9.7337e-15
		1.43	1.84548e-14	6.69111e-15	-3.51147e-15	1.56618e-14	2.20472e-15	5.66505e-15
		1.44	8.55192e-15	3.63938e-15	-4.06424e-15	1.545e-14	3.11725e-15	6.37513e-15
		1.45	7.7486e-15	3.92224e-15	-7.75527e-15	1.40886e-14	2.44611e-15	7.59934e-15
		1.46	5.20153e-15	7.91804e-15	2.99706e-15	2.1078e-14	-9.49503e-16	1.05226e-14
		1.47	4.04343e-15	5.70057e-15	-2.0719e-14	1.71968e-14	4.39858e-15	6.27919e-15
		1.48	7.60253e-15	4.46489e-15	-1.10169e-14	1.81182e-14	2.53619e-15	8.81149e-15
		1.49	9.10439e-15	4.79247e-15	-4.42432e-15	1.85244e-14	3.55118e-15	6.41811e-15
		1.5	4.848e-15	6.92853e-15	-1.04268e-14	1.46537e-14	3.9017e-15	8.51082e-15
		1.51	1.55837e-14	4.27268e-15	-4.35525e-15	2.53792e-14	2.96751e-15	6.87046e-15
		1.52	5.33154e-15	5.09485e-15	6.16146e-15	2.01818e-14	4.11946e-15	6.45186e-15
		1.53	5.09531e-15	5.92677e-15	-5.4334e-15	2.16626e-14	4.0553e-15	6.61652e-15
		1.54	2.80263e-15	5.63963e-15	-8.0728e-15	2.0179e-14	5.55096e-15	4.95479e-15
		1.55	1.25198e-14	6.46301e-15	-2.45216e-15	1.9661e-14	4.3013e-15	7.85599e-15
		1.56	1.05414e-14	4.768e-15	-1.1807e-14	1.97157e-14	7.9805e-15	4.93007e-15
		1.57	3.18393e-15	6.15492e-15	-1.05573e-14	2.08499e-14	3.66894e-15	7.60071e-15
		1.58	9.63668e-15	4.44384e-15	-1.83072e-14	2.01896e-14	1.00488e-14	7.2086e-15
		1.59	2.21689e-15	6.30699e-15	-1.12197e-14	2.42837e-14	4.20209e-15	6.24977e-15
		1.6	-1.51595e-15	5.89273e-15	-7.69407e-15	2.35432e-14	5.28738e-15	5.51667e-15
		1.61	5.63392e-15	3.43009e-15	-1.98255e-14	2.56813e-14	8.04546e-15	9.07156e-15
		1.62	3.75217e-15	3.40537e-15	-1.40553e-14	1.93449e-14	8.04291e-15	4.45497e-15
		1.63	4.89539e-15	6.74035e-15	-1.52519e-14	1.97907e-14	7.30781e-15	2.99085e-15
		1.64	9.87959e-15	4.97894e-15	-9.78851e-15	2.39509e-14	9.60207e-16	6.3079e-15
		1.65	5.98032e-15	3.55211e-15	-2.67254e-15	2.77136e-14	-7.37025e-16	7.30505e-15
		1.66	8.36864e-15	6.42582e-15	-1.85271e-14	2.12932e-14	4.41475e-15	5.42006e-15
		1.67	1.07249e-15	5.66609e-15	-2.23637e-14	2.30733e-14	5.26535e-15	7.71449e-15
		1.68	6.48413e-15	7.20255e-15	-1.50645e-14	2.23298e-14	3.86512e-15	7.67426e-15
		1.69	1.31114e-14	8.58349e-15	-1.7535e-14	2.06546e-14	8.1931e-15	5.08121e-15
		1.7	1.13356e-14	9.73644e-15	-1.75329e-14	2.32037e-14	4.76129e-15	4.74748e-15
		1.71	4.84761e-15	8.73155e-15	-7.21346e-15	2.34565e-14	3.77039e-15	7.50819e-15
		1.72	1.00432e-14	1.13684e-14	-1.82684e-14	2.55587e-14	4.24416e-15	5.16247e-15
		1.73	8.78835e-15	6.23672e-15	-2.47379e-14	2.41051e-14	1.3512e-14	3.67068e-15
		1.74	9.83399e-15	7.18012e-15	-2.82682e-14	2.61327e-14	9.03073e-15	2.61329e-15
		1.75	6.99241e-15	6.37735e-15	-2.30375e-14	2.14858e-14	7.5068e-15	6.64689e-15
		1.76	2.05959e-15	9.78762e-15	-1.9661e-14	2.32266e-14	6.91761e-15	5.89752e-15
		1.77	8.63896e-15	9.25977e-15	-1.94198e-14	2.31288e-14	4.53682e-15	5.59169e-15
		1.78	9.5052e-15	7.51726e-15	-1.4887e-14	2.74627e-14	5.396e-15	5.60583e-15
		1.79	1.39022e-14	6.90867e-15	-1.84273e-14	2.47323e-14	8.9706e-15	4.84808e-15
		1.8	7.3659e-15	1.12141e-14	-2.54659e-14	2.54843e-14	1.10312e-14	3.8467e-15
		1.81	9.92579e-15	7.79461e-15	-2.52436e-14	2.72471e-14	5.98413e-15	6.77344e-15
		1.82	7.70266e-15	9.6453e-15	-2.10075e-14	2.65567e-14	1.15957e-14	9.35544e-15
		1.83	8.26365e-15	9.55982e-15	-2.81131e-14	2.64528e-14	9.65247e-15	6.17252e-15
		1.84	9.49518e-15	8.61527e-15	-2.03402e-14	2.42584e-14	6.92209e-15	7.93038e-15
		1.85	1.18676e-14	9.13111e-15	-2.15205e-14	2.16654e-14	1.68199e-15	6.66632e-15
		1.86	1.09679e-14	1.57136e-14	-2.21464e-14	2.4886e-14	1.87161e-16	9.2454e-15
		1.87	1.78166e-14	1.00789e-14	-2.05833e-14	2.50522e-14	5.75518e-15	8.66592e-15
		1.88	1.24579e-14	8.83654e-15	-1.8652e-14	2.7073e-14	7.64015e-15	5.1062e-15
		1.89	6.44854e-15	7.52684e-15	-2.37684e-14	2.45156e-14	7.67591e-15	5.11095e-15
		1.9	7.43454e-15	6.58657e-15	-1.5035e-14	2.47092e-14	8.81662e-15	4.32443e-15
		1.91	6.1377e-15	3.84567e-15	-1.72107e-14	2.77593e-14	7.59125e-15	6.28437e-15
		1.92	-1.31096e-15	3.98493e-15	-2.27015e-14	2.50767e-14	5.94105e-15	5.73085e-15
		1.93	-2.53248e-15	6.50737e-15	-1.60109e-14	2.19782e-14	1.04933e-14	3.76946e-15
		1.94	1.46701e-15	4.65057e-15	-1.9769e-14	2.33604e-14	7.60307e-15	4.52106e-15
		1.95	-8.70792e-16	7.4921e-15	-1.2008e-14	2.63427e-14	7.33364e-15	2.5125e-15
		1.96	-5.18366e-15	8.30264e-15	-1.39611e-14	2.54204e-14	7.71636e-15	3.79579e-15
		1.97	-5.19234e-15	7.60594e-15	-1.59065e-14	2.41456e-14	7.92092e-15	5.96994e-15
		1.98	-3.42678e-15	7.07784e-15	-1.76614e-14	2.10684e-14	3.3083e-15	5.63803e-15
		1.99	-2.90585e-15	4.83283e-15	-1.48631e-14	2.52841e-14	4.80381e-15	4.15031e-15
		2	-2.76833e-15	5.90706e-15	-1.98375e-14	2.36721e-14	5.04148e-15	4.00074e-15
		2.01	-1.82452e-15	6.0238e-15	-1.56499e-14	2.46824e-14	3.94888e-15	4.97836e-15
		2.02	3.60099e-15	4.84078e-15	-1.17887e-14	2.56065e-14	2.11929e-15	4.9403e-15
		2.03	-1.38229e-16	2.49789e-15	-1.86387e-14	2.36415e-14	7.94719e-16	6.03211e-15
		2.04	-4.53191e-15	6.63747e-15	-2.0016e-14	2.19365e-14	1.91898e-15	4.54135e-15
		2.05	-8.96872e-16	4.60674e-15	-1.63547e-14	2.10306e-14	1.29926e-15	4.61992e-15
		2.06	2.4595e-15	4.65822e-15	-2.78971e-14	2.17088e-14	1.92784e-16	4.67076e-15
		2.07	4.17687e-15	4.44933e-15	-2.02935e-14	2.12675e-14	2.64354e-16	4.74036e-15
		2.08	4.18952e-15	6.26342e-15	-2.35283e-14	2.25642e-14	3.58385e-15	5.26838e-15
		2.09	7.43868e-15	7.59366e-15	-1.30602e-14	2.23992e-14	5.33261e-15	4.71528e-15
		2.1	6.05302e-15	7.70005e-15	-1.13648e-14	2.1901e-14	6.37495e-15	4.36602e-15
		2.11	5.70324e-15	4.83612e-15	-1.05838e-14	2.05905e-14	-1.47822e-15	6.83998e-15
		2.12	-1.58181e-16	2.61542e-15	-5.12571e-15	2.39967e-14	3.14205e-15	6.62545e-15
		2.13	1.8834e-15	5.90157e-15	-1.33416e-14	1.9293e-14	7.37908e-15	3.947e-15
		2.14	6.62327e-16	4.07186e-15	-9.09367e-15	2.03405e-14	4.41713e-15	5.81237e-15
		2.15	4.37127e-15	3.93619e-15	-1.49252e-14	1.96962e-14	4.29269e-15	4.58239e-15
		2.16	7.24334e-15	7.05602e-15	-1.06477e-14	1.63774e-14	3.4961e-15	7.91909e-15
		2.17	9.09727e-15	4.11257e-15	-1.46306e-14	1.541e-14	2.53646e-15	6.03719e-15
		2.18	-1.04523e-15	4.3561e-15	-9.94023e-15	1.70434e-14	4.69773e-15	5.34846e-15
		2.19	9.24717e-17	6.21199e-15	-2.23794e-15	1.92916e-14	4.85166e-15	5.30577e-15
		2.2	5.57356e-15	5.35711e-15	-1.37467e-14	1.57084e-14	6.36821e-16	3.65952e-15
		2.21	1.65792e-15	4.04248e-15	-1.31684e-14	1.73758e-14	2.65996e-15	6.22909e-15
		2.22	2.52988e-15	2.99554e-15	-1.55299e-15	1.78748e-14	1.6989e-15	5.53354e-15
		2.23	5.02819e-15	2.03197e-15	-4.09373e-15	1.35443e-14	8.37495e-15	3.98469e-15
		2.24	4.55703e-15	4.40825e-15	-2.10935e-14	1.37143e-14	6.09903e-15	4.41179e-15
		2.25	2.80503e-15	2.83956e-15	3.23957e-16	2.03574e-14	3.77229e-15	4.33786e-15
		2.26	-1.04083e-15	7.0643e-15	-7.12879e-15	1.38955e-14	-4.84683e-16	3.37864e-15
		2.27	3.56849e-15	5.65549e-15	-1.53392e-14	1.22466e-14	1.6313e-14	9.37239e-15
		2.28	-1.85197e-15	4.46391e-15	-5.52696e-15	1.90768e-14	1.59459e-14	6.67173e-15
		2.29	8.01735e-15	4.94977e-15	-9.50536e-15	1.51532e-14	1.28896e-14	6.27996e-15
		2.3	1.31925e-15	3.11379e-15	-5.91661e-15	1.46162e-14	8.71018e-15	4.83061e-15
		2.31	-7.87961e-15	6.01479e-15	-1.23269e-14	1.63242e-14	9.15293e-15	4.10316e-15
		2.32	1.88189e-15	5.06449e-15	-1.42851e-14	1.35057e-14	6.15319e-15	5.02788e-15
		2.33	9.48711e-16	4.18226e-15	-6.80217e-15	1.34202e-14	6.22329e-15	4.57693e-15
		2.34	1.379e-15	1.50429e-15	-5.60091e-16	1.73238e-14	9.30614e-15	6.65111e-15
		2.35	-1.97942e-15	5.10013e-15	-1.00923e-14	1.27341e-14	6.0904e-15	7.6916e-15
		2.36	1.32633e-15	5.75781e-15	-3.35795e-15	1.42175e-14	4.38769e-15	8.13133e-15
		2.37	3.48577e-15	4.46923e-15	2.55281e-15	1.37721e-14	6.99273e-15	7.60968e-15
		2.38	5.1674e-15	4.30835e-15	-3.62166e-15	1.27247e-14	1.26197e-14	5.06544e-15
		2.39	-6.99412e-16	2.5809e-15	-6.57541e-15	1.37192e-14	7.9373e-15	5.55888e-15
		2.4	1.82321e-15	2.65474e-15	-8.14388e-15	1.5663e-14	1.11338e-14	5.48391e-15
		2.41	6.05093e-16	4.87706e-15	-1.35313e-14	1.04938e-14	1.29242e-14	3.53359e-15
		2.42	2.81797e-15	3.11229e-15	-1.38301e-14	9.92008e-15	1.14515e-14	4.90133e-15
		2.43	5.77135e-15	4.05072e-15	-1.23158e-15	1.20336e-14	9.42612e-15	7.90031e-15
		2.44	3.36861e-15	5.87388e-15	-7.11236e-15	1.22508e-14	4.50862e-15	5.33401e-15
		2.45	9.77898e-16	5.70967e-15	-2.22247e-15	1.47048e-14	9.30295e-15	5.33604e-15
		2.46	6.15487e-15	8.78714e-15	-5.50068e-16	8.82362e-15	9.21396e-15	6.21117e-15
		2.47	-3.01072e-15	3.9706e-15	-4.64662e-15	1.16399e-14	6.94278e-15	5.51145e-15
		2.48	-3.42601e-15	4.39858e-15	-5.94096e-15	1.36335e-14	8.90801e-15	5.30715e-15
		2.49	1.87227e-15	4.1899e-15	-6.54743e-15	1.32892e-14	1.00194e-14	6.94419e-15
		2.5	6.07424e-15	5.84464e-15	5.26743e-15	1.77754e-14	7.70094e-15	6.01358e-15
		2.51	2.14795e-15	3.43747e-15	-1.00112e-14	1.20703e-14	3.54289e-15	6.77466e-15
		2.52	3.97902e-15	3.81912e-15	-4.29601e-15	1.17734e-14	9.19601e-15	5.67724e-15
		2.53	-1.10322e-15	3.1564e-15	-2.90097e-15	1.21077e-14	5.99589e-15	7.36688e-15
		2.54	2.4371e-16	1.87329e-15	-6.48471e-15	1.27656e-14	4.64668e-15	7.51768e-15
		2.55	4.28183e-16	5.73251e-15	3.51783e-15	1.27979e-14	5.60932e-15	5.1811e-15
		2.56	3.06092e-15	3.63882e-15	-3.49551e-15	1.07468e-14	5.96393e-15	4.9661e-15
		2.57	-1.32169e-15	5.65146e-15	-7.41042e-15	1.15515e-14	9.59197e-15	3.35856e-15
		2.58	3.3676e-15	3.74211e-15	1.62765e-15	1.31473e-14	5.30276e-15	5.06642e-15
		2.59	6.2845e-15	6.62794e-15	-4.18839e-16	1.63382e-14	1.07909e-14	5.12133e-15
		2.6	-1.12235e-15	4.80547e-15	-6.73136e-15	1.13584e-14	2.39264e-15	5.31448e-15
		2.61	4.3429e-15	1.74167e-15	-1.22953e-14	1.62188e-14	3.95839e-15	5.77559e-15
		2.62	1.22895e-15	1.69096e-15	3.91331e-15	1.10186e-14	4.86341e-15	5.51602e-15
		2.63	7.47033e-16	1.99995e-15	-2.01071e-15	1.2181e-14	7.0934e-15	6.24787e-15
		2.64	-2.46145e-15	3.67861e-15	7.14497e-15	9.46378e-15	1.06016e-14	5.25684e-15
		2.65	2.14972e-15	3.16478e-15	4.83118e-15	1.28237e-14	7.51551e-15	5.75828e-15
		2.66	3.32374e-15	2.3928e-15	-4.22603e-16	1.11807e-14	9.73073e-15	4.97632e-15
		2.67	5.74014e-15	2.66793e-15	-7.59449e-16	1.28038e-14	6.91464e-15	4.05872e-15
		2.68	3.92175e-15	3.63861e-15	-1.8511e-15	8.34302e-15	7.95641e-15	5.86063e-15
		2.69	-1.51774e-15	3.68632e-15	-1.22994e-15	7.0216e-15	9.00867e-15	7.17376e-15
		2.7	9.44149e-15	4.55294e-15	4.20565e-15	8.17959e-15	8.99632e-15	5.17944e-15
		2.71	2.32395e-15	4.0772e-15	1.07743e-15	1.18806e-14	9.12958e-15	7.93891e-15
		2.72	1.85059e-15	3.59345e-15	-1.01363e-14	1.13895e-14	5.10951e-15	8.8242e-15
		2.73	-1.73996e-15	3.83353e-15	3.17207e-15	6.6692e-15	1.20728e-14	6.57104e-15
		2.74	-6.61288e-16	2.26143e-15	-9.84619e-16	9.47309e-15	6.85487e-15	5.46229e-15
		2.75	4.09396e-15	2.35046e-15	-2.73765e-15	1.02323e-14	8.04469e-15	6.51604e-15
		2.76	-1.53672e-15	2.66306e-15	-9.43608e-15	7.32249e-15	9.24259e-15	5.82173e-15
		2.77	1.43548e-15	1.25729e-15	2.09215e-15	1.05076e-14	8.6133e-15	7.197e-15
		2.78	3.56213e-15	5.27215e-15	8.9357e-15	1.00682e-14	8.78145e-15	4.89257e-15
		2.79	-3.04353e-15	4.45683e-15	5.50547e-15	5.98787e-15	5.68945e-15	5.37805e-15
		2.8	-4.36188e-16	2.32626e-15	-1.59086e-15	1.05421e-14	3.30863e-15	6.12108e-15
		2.81	-1.83595e-15	3.63603e-15	-9.88445e-16	9.23556e-15	1.48779e-15	5.17407e-15
		2.82	-3.59099e-16	3.18976e-15	-1.96744e-15	8.1873e-15	8.33245e-15	2.05051e-15
		2.83	-4.19437e-15	5.23257e-15	-2.88093e-15	9.5637e-15	7.2505e-15	3.55984e-15
		2.84	-4.97394e-17	5.00132e-15	1.21386e-14	1.93211e-14	9.30783e-16	5.94317e-15
		2.85	1.91611e-15	4.60356e-15	7.98028e-16	1.43011e-14	5.06487e-15	4.32866e-15
		2.86	-3.06405e-15	3.23388e-15	-8.05519e-15	8.19554e-15	8.5351e-15	2.9298e-15
		2.87	-4.79846e-15	3.86612e-15	5.8293e-16	8.23825e-15	6.06023e-15	3.45475e-15
		2.88	-1.38994e-15	4.00873e-15	2.91251e-15	7.91716e-15	7.77895e-15	5.69219e-15
		2.89	2.79155e-15	4.96307e-15	-1.27008e-15	1.1912e-14	6.78659e-15	6.52188e-15
		2.9	4.06354e-15	3.51111e-15	-8.75883e-15	7.85488e-15	8.31183e-15	6.52976e-15
		2.91	-6.51629e-16	4.15714e-15	-3.77769e-15	1.13578e-14	1.09632e-14	5.33348e-15
		2.92	5.38647e-16	4.08359e-15	1.7345e-15	1.34422e-14	7.27878e-15	5.41904e-15
		2.93	-3.06775e-15	5.45992e-15	6.13168e-15	8.99591e-15	7.93331e-15	6.17183e-15
		2.94	-2.96491e-15	6.17727e-15	5.38607e-16	1.1095e-14	8.57973e-15	5.24348e-15
		2.95	-1.7282e-15	3.47707e-15	-6.65998e-15	1.22479e-14	9.65604e-15	7.57426e-15
		2.96	-6.09457e-15	3.31934e-15	2.82964e-15	1.20783e-14	5.04519e-15	5.85105e-15
		2.97	-8.59233e-16	2.38145e-15	4.23581e-15	1.21469e-14	7.50257e-15	6.02944e-15
		2.98	3.65948e-15	3.54287e-15	1.6212e-15	8.57131e-15	6.16198e-15	6.27271e-15
		2.99	-1.90771e-15	4.55496e-15	5.00286e-15	1.1585e-14	8.07077e-15	5.04112e-15
		3	-2.11416e-15	1.3812e-15	-4.06027e-15	1.03526e-14	1.23473e-14	5.32095e-15
		3.01	-3.79575e-15	2.45358e-15	4.41094e-15	1.13299e-14	8.54836e-15	4.30467e-15
		3.02	-6.35877e-16	2.74761e-15	-1.20467e-14	1.06403e-14	7.27832e-15	4.83674e-15
		3.03	-6.05256e-16	2.55154e-15	3.18408e-15	9.89449e-15	1.04693e-14	5.36229e-15
		3.04	1.70144e-16	4.95444e-15	2.11761e-15	1.2802e-14	4.65369e-15	6.04614e-15
		3.05	-1.45078e-15	1.77999e-15	6.74282e-15	1.01208e-14	4.41463e-15	6.39025e-15
		3.06	-2.41388e-15	3.20242e-15	-4.98553e-16	1.16546e-14	1.43945e-14	5.76924e-15
		3.07	-6.10975e-15	2.19727e-15	1.54744e-16	9.34754e-15	6.99267e-15	5.31786e-15
		3.08	-1.05928e-15	4.07626e-15	-6.37635e-15	6.79779e-15	6.12571e-15	4.91748e-15
		3.09	-3.26946e-15	2.30797e-15	3.32053e-16	8.67395e-15	4.32523e-15	3.19687e-15
		3.1	1.67832e-15	3.13221e-15	-1.41644e-15	7.07818e-15	9.07852e-15	5.08473e-15
		3.11	3.76817e-17	3.67527e-15	7.49615e-15	9.24694e-15	7.63208e-15	3.70556e-15
		3.12	-5.7704e-15	2.74938e-15	-5.51307e-15	6.49285e-15	6.06085e-15	7.08082e-15
		3.13	-8.37482e-15	2.35489e-15	-1.98146e-15	1.16652e-14	9.37303e-15	7.66473e-15
		3.14	-2.42839e-15	2.50896e-15	-6.2357e-15	9.8977e-15	1.07962e-15	5.43008e-15
		3.15	-4.49503e-15	1.8276e-15	-6.68317e-15	9.54977e-15	1.80259e-15	4.7612e-15
		3.16	-5.62347e-16	5.17832e-15	9.65563e-16	1.18597e-14	4.63872e-15	4.71673e-15
		3.17	-8.46232e-15	3.48199e-15	-1.85152e-15	1.16207e-14	4.49693e-15	4.11611e-15
		3.18	-1.0125e-16	5.27863e-15	-9.75646e-15	1.4384e-14	6.6609e-15	4.37053e-15
		3.19	-8.86823e-15	2.98638e-15	-3.75875e-15	9.01245e-15	9.23061e-15	3.50022e-15
		3.2	-5.01502e-15	3.57921e-15	1.90979e-15	1.47695e-14	1.3226e-15	5.37294e-15
		3.21	-5.45e-16	3.54485e-15	-3.95153e-15	1.03439e-14	5.47594e-15	4.43934e-15
		3.22	-9.01492e-15	3.70513e-15	6.86048e-15	7.81961e-15	2.10856e-15	3.57153e-15
		3.23	-1.95575e-15	3.10209e-15	-5.56356e-15	8.67061e-15	6.4556e-15	3.22149e-15
		3.24	-8.55627e-16	4.89676e-15	1.19083e-15	1.31969e-14	5.50688e-15	4.17418e-15
		3.25	-4.64179e-15	1.52465e-15	-1.47996e-14	1.08511e-14	3.66173e-15	6.01796e-15
		3.26	-2.34006e-15	4.27373e-15	3.31542e-15	7.66479e-15	2.49313e-15	3.13132e-15
		3.27	-3.49899e-15	2.64113e-15	-7.70753e-15	8.92866e-15	2.94253e-15	4.56445e-15
		3.28	-5.38228e-15	3.39636e-15	-4.49071e-15	9.58065e-15	3.2975e-15	3.69156e-15
		3.29	-2.19734e-15	3.54787e-15	-8.92187e-15	8.51337e-15	3.05955e-15	4.73498e-15
		3.3	9.71337e-16	3.62053e-15	-5.91272e-15	8.38588e-15	9.49079e-15	5.77816e-15
		3.31	1.03512e-15	2.89452e-15	-1.27031e-14	9.32848e-15	4.24324e-15	5.62471e-15
		3.32	-4.91959e-15	3.02513e-15	-2.42055e-15	9.26045e-15	5.5972e-15	5.11604e-15
		3.33	-4.25537e-15	3.54252e-15	-1.17968e-14	9.84889e-15	1.8254e-15	5.66031e-15
		3.34	-1.4216e-15	4.04214e-15	-2.61839e-15	9.45296e-15	7.48773e-15	5.64901e-15
		3.35	-3.99307e-15	3.505e-15	-1.0608e-14	1.3135e-14	5.81056e-15	3.39353e-15
		3.36	-2.11956e-16	2.37584e-15	-1.54147e-14	1.28396e-14	5.94609e-15	3.2269e-15
		3.37	-5.08463e-15	2.40967e-15	-6.51479e-15	9.92102e-15	8.7813e-15	2.21168e-15
		3.38	-1.62498e-16	3.63958e-15	-4.18276e-15	1.05249e-14	6.1628e-15	3.60337e-15
		3.39	-5.51933e-15	4.67731e-15	-4.18747e-15	1.06698e-14	2.0189e-15	3.90887e-15
		3.4	-3.6253e-15	2.6532e-15	-6.01693e-16	8.06874e-15	2.18855e-15	2.82083e-15
		3.41	-1.52729e-15	3.25312e-15	-1.03525e-14	1.45458e-14	4.88403e-15	2.39667e-15
		3.42	-8.15741e-15	1.19974e-15	2.60177e-18	4.92976e-15	2.79906e-15	2.53207e-15
		3.43	-5.1433e-15	3.56467e-15	-7.80935e-15	8.10923e-15	2.67984e-15	4.92317e-15
		3.44	3.03208e-16	4.13269e-15	-5.84624e-15	9.34432e-15	4.61929e-15	2.72972e-15
		3.45	-2.99604e-15	3.51735e-15	-6.13146e-15	1.10888e-14	1.87889e-15	2.06178e-15
		3.46	2.32301e-15	3.95508e-15	-6.42918e-15	1.59438e-14	-1.13511e-15	2.71196e-15
		3.47	-3.14167e-15	2.95611e-15	-4.29801e-15	8.75184e-15	3.21087e-15	2.11595e-15
		3.48	1.29221e-15	7.00758e-15	-1.47813e-14	1.43598e-14	2.92426e-15	1.88033e-15
		3.49	-2.42771e-15	4.16116e-15	2.4396e-16	1.29197e-14	5.19388e-15	1.45242e-15
		3.5	-2.97699e-15	3.10787e-15	1.67417e-15	7.96597e-15	2.71072e-15	2.09783e-15
		3.51	-2.53247e-15	2.66048e-15	9.82841e-16	1.35746e-14	4.79641e-15	2.45542e-15
		3.52	1.40266e-15	5.32417e-15	-1.43233e-14	1.60129e-14	7.53966e-15	3.26589e-15
		3.53	4.1858e-15	4.50838e-15	-2.40468e-15	1.26153e-14	6.44164e-15	2.62066e-15
		3.54	3.29515e-15	6.38634e-15	-9.2971e-15	1.44007e-14	2.82675e-15	2.59158e-15
		3.55	4.21952e-15	5.57095e-15	6.66242e-16	1.22672e-14	9.95014e-16	1.4443e-15
		3.56	-3.45183e-15	4.07845e-15	2.82298e-15	1.44697e-14	2.76573e-16	1.33969e-15
		3.57	-1.93977e-15	3.21155e-15	-1.04768e-16	1.3989e-14	5.52898e-15	2.30744e-15
		3.58	-2.30985e-15	3.26857e-15	-6.07617e-15	1.18107e-14	7.4688e-16	5.11863e-15
		3.59	1.43705e-16	2.6703e-15	-1.10765e-14	1.01805e-14	3.32826e-15	2.43187e-15
		3.6	2.70834e-15	4.33147e-15	-1.50595e-15	8.57051e-15	6.19481e-15	2.93511e-15
		3.61	-3.56641e-15	3.21302e-15	-7.31711e-16	1.15497e-14	6.45007e-15	1.82074e-15
		3.62	-2.31339e-15	5.29439e-15	-1.44437e-14	1.48809e-14	5.3036e-15	2.25724e-15
		3.63	-5.10759e-15	3.30984e-15	-8.82387e-15	1.26337e-14	4.83963e-15	2.14526e-15
		3.64	-2.68028e-15	3.48084e-15	-7.90085e-16	1.38201e-14	5.01349e-15	3.3114e-15
		3.65	-1.05613e-15	2.72562e-15	-6.10182e-15	1.17366e-14	3.57491e-15	2.78885e-15
		3.66	-2.9329e-15	5.3616e-15	-1.11773e-14	1.38569e-14	2.1486e-15	2.48416e-15
		3.67	-2.39834e-18	5.01564e-15	3.10007e-15	8.72635e-15	5.19755e-15	3.34033e-15
		3.68	1.03919e-15	8.1566e-15	-5.94486e-16	1.05267e-14	7.01783e-15	2.30683e-15
		3.69	-1.42788e-15	4.46548e-15	-6.97662e-15	1.21648e-14	4.83285e-15	4.66531e-15
		3.7	-3.4994e-15	5.22498e-15	-3.42227e-15	1.4172e-14	8.04679e-15	3.9755e-15
		3.71	-2.36188e-15	4.10924e-15	-7.71889e-15	1.58605e-14	3.89699e-15	2.83048e-15
		3.72	2.06959e-15	7.40134e-15	-1.25059e-14	1.52049e-14	1.30409e-15	2.51813e-15
		3.73	-4.18043e-15	4.11878e-15	-1.74593e-14	1.48295e-14	1.03304e-14	2.82959e-15
		3.74	-9.56303e-15	4.25937e-15	-1.07221e-14	1.4968e-14	1.01299e-14	3.15438e-15
		3.75	-8.97399e-15	4.32149e-15	-5.10969e-17	1.01294e-14	4.90003e-15	3.49545e-15
		3.76	-4.22497e-16	8.53611e-15	5.91999e-16	1.23557e-14	4.55119e-15	2.36495e-15
		3.77	2.57252e-16	9.39917e-15	3.42889e-15	1.41547e-14	7.2156e-15	1.79935e-15
		3.78	1.83613e-15	6.8735e-15	-4.59847e-15	1.32251e-14	3.61985e-15	1.40613e-15
		3.79	-4.26239e-15	2.46271e-15	8.27174e-16	1.26324e-14	6.58167e-15	2.43127e-15
		3.8	3.00413e-15	5.86295e-15	-1.04455e-14	1.45848e-14	-5.75003e-16	2.14754e-15
		3.81	-1.70163e-15	4.11341e-15	1.65274e-15	1.65854e-14	6.50001e-15	1.31942e-15
		3.82	1.72396e-15	3.36773e-15	-7.0573e-15	1.67977e-14	4.01472e-15	1.85836e-15
		3.83	4.09e-15	4.65013e-15	-5.6231e-15	1.59527e-14	6.4321e-16	5.1457e-15
		3.84	4.34776e-15	5.06999e-15	-1.34323e-14	1.61435e-14	3.4902e-15	4.60173e-15
		3.85	1.72819e-15	5.88569e-15	-4.50006e-15	1.69948e-14	-9.7398e-16	2.72821e-15
		3.86	4.87834e-15	7.70235e-15	-5.94549e-15	1.31966e-14	5.24164e-15	5.50414e-15
		3.87	1.32424e-15	4.55737e-15	-1.09597e-14	1.58198e-14	-5.83852e-16	2.12633e-15
		3.88	-1.73901e-15	5.1414e-15	-6.66099e-15	9.65075e-15	3.89042e-15	2.02261e-15
		3.89	1.86894e-15	7.93646e-15	-4.84666e-15	1.70948e-14	2.43175e-15	2.33129e-15
		3.9	1.2731e-15	8.36283e-15	-3.76449e-15	1.68186e-14	-1.84059e-15	4.20118e-15
		3.91	-1.13856e-16	6.19143e-15	-7.66545e-15	1.63108e-14	6.94952e-15	4.27294e-15
		3.92	-4.27173e-15	5.24795e-15	-9.67571e-15	1.41802e-14	5.5129e-15	3.70781e-15
		3.93	5.47261e-15	6.12903e-15	-1.55196e-14	1.46531e-14	6.89895e-15	1.4475e-15
		3.94	3.58882e-15	7.92299e-15	-1.15301e-14	1.40621e-14	2.27492e-15	2.29511e-15
		3.95	-3.21988e-15	5.97139e-15	-1.09289e-14	1.49171e-14	5.39394e-15	4.39907e-15
		3.96	-1.03446e-15	2.2906e-15	-1.19194e-14	1.43028e-14	3.52779e-15	2.54236e-15
		3.97	-4.76089e-15	4.9901e-15	-1.0142e-14	1.33557e-14	8.34896e-15	2.76185e-15
		3.98	-1.59555e-15	3.54856e-15	-4.88976e-15	1.04022e-14	7.17782e-15	8.8991e-16
		3.99	-4.37927e-16	3.72265e-15	-6.73754e-15	1.16645e-14	6.07392e-15	2.87208e-15
		4	-3.16979e-15	2.43247e-15	-9.91535e-15	9.48495e-15	5.6635e-16	3.38346e-15
		4.01	-1.62969e-15	3.29614e-15	-6.90147e-16	9.62313e-15	1.50082e-15	2.45784e-15
		4.02	1.03974e-15	3.79524e-15	-7.76047e-15	1.27481e-14	1.58654e-15	2.82968e-15
		4.03	2.42371e-15	2.08681e-15	-5.23201e-16	1.09699e-14	8.27248e-15	2.6455e-15
		4.04	-3.23926e-15	3.85988e-15	-3.10433e-15	1.8806e-14	3.7032e-15	4.1202e-15
		4.05	1.41473e-15	2.54275e-15	-8.64923e-15	1.19814e-14	-1.1177e-15	2.74666e-15
		4.06	1.796e-15	3.15387e-15	-3.47575e-15	1.21568e-14	-6.10584e-16	4.60548e-15
		4.07	1.80111e-15	3.75313e-15	-1.41998e-14	9.16292e-15	4.1043e-15	2.4021e-15
		4.08	-1.62337e-15	1.73269e-15	-1.46344e-15	1.29214e-14	5.01848e-15	2.8778e-15
		4.09	2.35248e-15	4.15423e-15	-1.09086e-15	6.23663e-15	-1.67893e-15	4.10259e-15
		4.1	6.53893e-17	3.16526e-15	-8.26485e-15	1.23775e-14	4.33603e-15	2.88304e-15
		4.11	3.51942e-15	3.76398e-15	-1.96505e-14	1.64168e-14	4.88982e-15	4.30112e-15
		4.12	4.86639e-16	4.21751e-15	-1.16744e-14	1.50282e-14	-1.04089e-15	4.31823e-15
		4.13	-1.38318e-15	3.17401e-15	-1.55923e-14	1.48147e-14	5.14346e-15	3.37029e-15
		4.14	-1.4585e-15	3.2897e-15	-1.00085e-14	1.05898e-14	4.19264e-15	2.77974e-15
		4.15	8.14632e-16	4.83678e-15	-8.83172e-15	1.19543e-14	3.21984e-15	3.00435e-15
		4.16	-2.45335e-15	3.05578e-15	2.10168e-16	1.42894e-14	-3.36452e-16	2.92735e-15
		4.17	-8.52234e-15	3.5844e-15	-2.70801e-15	9.40983e-15	-1.90258e-16	1.40537e-15
		4.18	-2.21711e-16	5.57156e-15	-4.48752e-15	1.59375e-14	3.95999e-15	2.43081e-15
		4.19	-8.71353e-16	2.29959e-15	-1.71701e-14	1.60964e-14	1.06165e-15	3.73572e-15
		4.2	-5.72053e-16	2.23205e-15	-2.11378e-14	1.77582e-14	-2.75358e-15	2.50446e-15
		4.21	2.83912e-15	3.98581e-15	-9.58879e-15	1.60368e-14	4.41844e-15	2.55753e-15
		4.22	-2.01151e-15	4.81052e-15	-3.62346e-16	1.34915e-14	1.37188e-15	3.11083e-15
		4.23	9.66158e-16	3.024e-15	-7.42304e-16	1.49555e-14	1.57568e-15	2.59885e-15
		4.24	-2.24241e-15	3.48155e-15	-3.16096e-15	1.77134e-14	4.76481e-15	4.74179e-15
		4.25	-2.17735e-16	3.31054e-15	-9.2613e-16	1.37648e-14	1.20525e-15	3.72194e-15
		4.26	-4.48387e-15	2.40564e-15	-6.72234e-15	1.5653e-14	3.43337e-15	3.28212e-15
		4.27	-1.30761e-15	2.65339e-15	-1.09412e-14	1.11927e-14	2.8857e-15	2.97634e-15
		4.28	1.0888e-15	2.35068e-15	-1.34657e-14	9.70125e-15	5.88443e-15	1.01337e-15
		4.29	-2.55175e-15	4.63101e-15	-1.42881e-14	1.16978e-14	6.79153e-16	3.12164e-15
		4.3	-4.71316e-15	1.52799e-15	-1.09301e-14	1.42145e-14	4.45049e-16	4.05483e-15
		4.31	-2.28775e-15	2.31003e-15	-6.29956e-15	1.61462e-14	-6.05819e-17	2.5962e-15
		4.32	-3.42192e-15	2.91475e-15	-1.14936e-14	2.11268e-14	1.14566e-15	1.98425e-15
		4.33	-5.91297e-15	1.82732e-15	-5.56566e-15	1.5438e-14	-1.21473e-15	4.7182e-15
		4.34	-3.53844e-15	2.79219e-15	-1.38642e-14	1.27396e-14	-8.47052e-16	2.9985e-15
		4.35	-8.68002e-16	1.59016e-15	2.88522e-15	1.71069e-14	-3.56819e-15	1.62091e-15
		4.36	-1.49338e-15	1.68365e-15	-7.12856e-15	1.47531e-14	-9.77074e-16	3.1932e-15
		4.37	-3.6577e-15	1.64101e-15	3.50119e-15	2.43701e-14	-2.2833e-15	3.33198e-15
		4.38	-1.05709e-15	3.38303e-15	-2.19784e-14	1.55989e-14	-1.37018e-15	3.53188e-15
		4.39	-7.36734e-15	3.04427e-15	5.81391e-15	1.47074e-14	-3.26607e-16	2.13868e-15
		4.4	-1.24242e-15	2.81252e-15	1.41512e-15	1.01548e-14	-3.90303e-15	2.49916e-15
		4.41	-2.23734e-15	3.86168e-15	-2.12753e-15	1.56526e-14	-9.57025e-16	2.55938e-15
		4.42	8.62932e-16	2.79595e-15	-1.20536e-14	1.42824e-14	-4.8348e-16	1.60568e-15
		4.43	8.57557e-16	1.1994e-15	1.30048e-15	1.79028e-14	-6.18636e-15	2.62812e-15
		4.44	-4.28958e-15	3.79168e-15	-2.65625e-15	1.99208e-14	-4.82636e-15	3.77192e-15
		4.45	1.68525e-15	2.56625e-15	1.45146e-15	1.64591e-14	-6.5548e-15	3.08821e-15
		4.46	-3.99913e-15	2.70692e-15	-1.66131e-14	1.52569e-14	-1.60697e-15	1.35821e-15
		4.47	1.74356e-15	1.49105e-15	-9.59998e-15	1.40167e-14	-4.7702e-15	1.38721e-15
		4.48	8.03358e-15	3.87455e-15	-9.60524e-15	1.8116e-14	1.44522e-16	7.8242e-16
		4.49	3.9721e-15	3.69132e-15	-6.18972e-15	1.76277e-14	1.91052e-15	1.15449e-15
		4.5	2.62552e-15	6.56336e-15	-9.49547e-15	1.6803e-14	-5.74499e-15	1.94987e-15
		4.51	1.10846e-15	4.16142e-15	-2.29665e-15	1.43875e-14	1.20464e-15	2.79385e-15
		4.52	-4.01019e-15	3.0931e-15	-6.14652e-15	1.65437e-14	2.87152e-16	3.40214e-15
		4.53	2.10172e-15	1.61995e-15	-5.32627e-15	1.63306e-14	-6.29157e-17	1.0953e-15
		4.54	-6.26163e-16	4.76673e-15	-1.88991e-15	1.53252e-14	-3.87575e-15	1.55547e-15
		4.55	1.52264e-15	1.77763e-15	-7.92641e-16	1.95826e-14	-4.1326e-15	1.64285e-15
		4.56	-4.02366e-16	2.90597e-15	-5.9078e-16	1.44631e-14	2.7027e-16	2.57302e-15
		4.57	-3.15976e-15	3.70459e-15	-1.22785e-14	1.60399e-14	-1.11706e-15	1.39829e-15
		4.58	-7.65389e-16	4.41551e-15	-4.81221e-15	2.31448e-14	-3.83157e-15	1.58729e-15
		4.59	5.50969e-15	1.87596e-15	-7.12567e-15	1.67033e-14	-1.93369e-15	1.97841e-15
		4.6	2.26968e-15	1.61663e-15	-5.72259e-15	1.75021e-14	-6.04349e-15	1.22674e-15
		4.61	1.752e-15	1.69412e-15	1.12658e-15	1.28386e-14	9.28492e-16	3.21773e-15
		4.62	-3.54495e-15	1.87173e-15	-2.83219e-15	1.69325e-14	-6.4462e-16	2.84909e-15
		4.63	-3.29908e-15	2.07924e-15	-1.39231e-14	1.18749e-14	1.50601e-15	3.64785e-15
		4.64	2.29615e-15	3.61176e-15	4.78029e-15	1.60364e-14	-2.76605e-15	1.01516e-15
		4.65	-1.30645e-15	3.23737e-15	1.83057e-15	1.55084e-14	-2.41473e-15	1.14457e-15
		4.66	-2.70955e-15	2.98718e-15	5.50001e-15	1.19988e-14	2.15598e-15	1.33149e-15
		4.67	1.55537e-15	1.36767e-15	-9.40211e-15	1.25703e-14	4.41082e-15	2.73152e-15
		4.68	3.30681e-15	2.3713e-15	-1.92271e-16	1.79192e-14	7.12646e-17	3.94954e-15
		4.69	-3.07009e-15	5.25405e-15	-1.24188e-14	1.20159e-14	2.72701e-16	2.36295e-15
		4.7	1.97007e-16	4.89596e-15	-3.42777e-15	1.09631e-14	-9.91822e-16	1.23579e-15
		4.71	2.82721e-15	3.17065e-15	-1.49997e-15	1.08923e-14	-3.46013e-15	4.28841e-15
		4.72	3.21983e-15	2.68346e-15	-6.9576e-15	1.46775e-14	-1.15734e-15	3.08607e-15
		4.73	7.62144e-15	1.46957e-15	5.55227e-15	1.50679e-14	-1.36049e-15	3.43499e-15
		4.74	5.89824e-15	3.01332e-15	5.65594e-16	2.30182e-14	-6.40568e-15	2.08809e-15
		4.75	8.41533e-15	3.20183e-15	3.534e-16	1.50906e-14	-5.66937e-15	2.03051e-15
		4.76	6.27483e-15	2.89315e-15	-4.18001e-15	2.06395e-14	-5.61611e-15	1.9718e-15
		4.77	2.78458e-15	2.57946e-15	-5.77469e-15	1.88606e-14	-4.35734e-15	1.61639e-15
		4.78	3.04823e-15	2.50039e-15	1.91814e-15	1.81389e-14	-6.84629e-16	2.96234e-15
		4.79	4.66457e-15	3.63827e-15	-4.89637e-15	1.57122e-14	-2.36263e-15	3.88833e-15
		4.8	4.3794e-15	3.14429e-15	-1.45187e-14	1.46214e-14	2.42494e-15	1.83955e-15
		4.81	5.86572e-15	3.41663e-15	-1.85473e-14	1.6001e-14	-1.63862e-15	3.0644e-15
		4.82	5.22187e-15	4.00553e-15	-8.94111e-15	1.2831e-14	-1.67302e-15	2.64718e-15
		4.83	-3.69759e-15	2.87483e-15	-4.35053e-15	1.17936e-14	9.26216e-16	2.35816e-15
		4.84	-6.6758e-16	2.00596e-15	-5.14367e-15	1.70447e-14	3.36372e-15	4.383e-15
		4.85	-4.83791e-15	4.02461e-15	3.40631e-15	1.58509e-14	1.96302e-15	3.1101e-15
		4.86	-2.19609e-15	2.89817e-15	9.75705e-16	1.67459e-14	4.48552e-15	2.19354e-15
		4.87	-4.26059e-15	2.4571e-15	-7.04105e-15	1.6613e-14	8.72094e-15	5.93642e-15
		4.88	-2.94586e-15	2.34183e-15	-1.03079e-14	1.87616e-14	1.93206e-15	4.01966e-15
		4.89	-2.0854e-15	2.24506e-15	-2.0051e-15	1.54217e-14	-1.08937e-16	7.37524e-15
		4.9	2.42739e-15	1.63792e-15	-2.09357e-15	1.49865e-14	-3.53776e-15	5.99131e-15
		4.91	-1.35809e-15	1.5286e-15	-1.30074e-16	1.17226e-14	-1.13685e-15	4.81675e-15
		4.92	-1.01861e-15	2.94177e-15	-8.18883e-16	1.45215e-14	6.63622e-15	4.11962e-15
		4.93	-1.93923e-15	2.867e-15	-3.34756e-15	1.07146e-14	-1.11076e-15	3.18979e-15
		4.94	5.56576e-15	2.69375e-15	1.70159e-16	1.56903e-14	-3.17856e-15	3.2649e-15
		4.95	2.28542e-15	2.35964e-15	-5.49213e-15	1.47021e-14	-5.52205e-15	3.48629e-15
		4.96	2.98277e-16	4.35097e-15	4.29929e-16	2.18947e-14	1.58943e-15	3.11286e-15
		4.97	1.85208e-15	4.67613e-15	2.23351e-15	1.38932e-14	3.64121e-15	6.41892e-15
		4.98	-1.70859e-16	5.07503e-15	1.76111e-15	1.49386e-14	2.79337e-15	4.29821e-15
		4.99	-1.70205e-15	2.30309e-15	1.57625e-16	1.6547e-14	2.75783e-16	3.95109e-15
		5	9.51503e-17	2.34014e-15	-1.00644e-14	1.61761e-14	-3.22738e-15	3.21671e-15
		5.01	-1.98193e-15	2.90553e-15	-9.39436e-15	1.3076e-14	2.45165e-16	3.4343e-15
		5.02	3.56651e-15	2.5122e-15	1.5472e-15	1.717e-14	-9.23036e-16	4.66493e-15
		5.03	1.54017e-15	2.42922e-15	-6.52388e-15	1.02429e-14	3.22126e-15	3.14222e-15
		5.04	3.59912e-15	1.87451e-15	-2.84569e-15	1.15167e-14	1.11461e-15	2.47609e-15
		5.05	2.65286e-16	1.71233e-15	-8.97118e-15	1.40076e-14	3.52086e-15	1.9297e-15
		5.06	2.88103e-15	1.95272e-15	-9.87961e-15	1.08402e-14	-4.00371e-16	3.64795e-15
		5.07	1.00804e-16	3.33952e-15	-8.05799e-15	1.12783e-14	-1.43867e-15	2.064e-15
		5.08	2.07353e-15	2.96266e-15	5.47048e-16	1.34179e-14	2.29227e-15	2.66074e-15
		5.09	1.82791e-15	3.88254e-15	8.3043e-16	1.66792e-14	-8.26156e-16	4.39553e-15
		5.1	2.19251e-15	2.50668e-15	5.08857e-15	8.57229e-15	1.62702e-15	3.20645e-15
		5.11	-6.10648e-16	3.44194e-15	2.34238e-16	1.56549e-14	1.66239e-15	2.86619e-15
		5.12	3.11362e-15	3.2983e-15	-1.26682e-15	1.34604e-14	4.62176e-15	2.48011e-15
		5.13	1.00977e-15	3.52336e-15	-2.16518e-15	8.78479e-15	2.4538e-15	1.47943e-15
		5.14	1.01242e-15	4.95671e-15	9.07482e-15	1.41312e-14	1.91003e-15	3.78435e-15
		5.15	2.84667e-15	2.64728e-15	-2.73624e-15	5.05633e-15	-6.47751e-16	5.46994e-15
		5.16	4.40169e-16	1.81869e-15	5.39634e-15	1.20936e-14	4.24595e-16	2.44206e-15
		5.17	-1.22373e-15	2.16196e-15	-6.19858e-15	1.13753e-14	2.75976e-16	2.86171e-15
		5.18	-1.85429e-15	3.53352e-15	-2.93451e-15	1.19456e-14	4.06735e-15	2.35273e-15
		5.19	-9.04789e-16	3.06667e-15	-7.22456e-15	1.25291e-14	-5.43221e-15	2.90824e-15
		5.2	8.76601e-16	3.1391e-15	-4.18235e-15	1.64112e-14	-1.10243e-15	1.73063e-15
		5.21	-1.35691e-15	3.41351e-15	4.17739e-15	9.48997e-15	5.26555e-15	4.40664e-15
		5.22	-4.47864e-15	3.50122e-15	-2.10391e-15	9.24997e-15	-3.65948e-15	1.46311e-15
		5.23	1.01987e-15	1.98416e-15	4.71606e-15	8.72043e-15	-3.62689e-15	2.61031e-15
		5.24	1.17377e-16	2.47032e-15	-5.97833e-15	8.94199e-15	1.6688e-15	3.55119e-15
		5.25	-6.64145e-16	1.47447e-15	-1.09368e-15	1.02517e-14	9.85804e-16	5.11975e-15
		5.26	-3.49885e-15	3.02678e-15	4.56393e-15	1.09103e-14	-4.62463e-15	2.81023e-15
		5.27	1.85508e-16	1.87348e-15	-1.59138e-15	1.11613e-14	-2.73232e-15	2.47477e-15
		5.28	-4.95067e-15	4.38749e-15	-5.88324e-15	6.22844e-15	-2.9963e-15	1.76855e-15
		5.29	-2.58592e-15	3.77775e-15	-7.06056e-15	8.16047e-15	-5.63662e-15	3.07238e-15
		5.3	-5.60043e-15	2.79454e-15	-2.25356e-15	6.95223e-15	-2.82353e-15	5.3016e-15
		5.31	-6.0316e-15	2.81492e-15	7.73196e-15	8.42712e-15	-3.33724e-15	2.43935e-15
		5.32	4.32198e-15	6.19317e-15	1.15317e-14	6.70562e-15	-2.39872e-15	5.06502e-15
		5.33	-2.11339e-15	5.09979e-15	-2.17086e-15	6.6629e-15	-4.52141e-15	3.16951e-15
		5.34	8.93484e-16	5.73149e-15	6.36015e-15	1.07911e-14	-5.62118e-15	4.30848e-15
		5.35	-1.72691e-15	1.64701e-15	7.40379e-15	8.22752e-15	-7.36107e-15	2.90058e-15
		5.36	-1.68721e-16	4.87084e-15	1.5468e-14	1.3692e-14	-4.26646e-15	1.59173e-15
		5.37	-4.41488e-15	2.42723e-15	-3.80573e-15	6.10243e-15	-3.32792e-15	1.70215e-15
		5.38	-9.90069e-16	2.24727e-15	3.28526e-15	7.70756e-15	-6.37936e-15	3.53554e-15
		5.39	-4.22778e-15	1.66944e-15	8.3435e-15	6.2554e-15	-3.10141e-15	3.5203e-15
		5.4	-8.45486e-16	3.37729e-15	-4.04277e-15	4.76794e-15	-3.10614e-15	3.59417e-15
		5.41	-5.49699e-15	4.05707e-15	7.23127e-15	5.86383e-15	-4.83656e-15	3.45475e-15
		5.42	1.35851e-15	3.11265e-15	8.2865e-15	8.60367e-15	-1.7511e-15	3.51014e-15
		5.43	1.27276e-15	2.49717e-15	3.42511e-15	3.43335e-15	-2.28935e-15	8.55317e-16
		5.44	7.38092e-15	2.93908e-15	6.90035e-15	7.16339e-15	-5.67936e-15	2.35675e-15
		5.45	-8.83367e-16	3.26958e-15	-3.02568e-15	5.04919e-15	-3.50307e-15	1.09184e-15
		5.46	4.1744e-16	3.16691e-15	1.00848e-14	7.23859e-15	-3.05386e-15	3.70772e-15
		5.47	1.16982e-15	3.01928e-15	1.49057e-14	8.16208e-15	1.58519e-15	3.29192e-15
		5.48	5.17614e-15	1.54994e-15	7.61818e-15	6.53654e-15	-2.6266e-15	3.09987e-15
		5.49	-2.6974e-16	3.85836e-15	3.86461e-15	1.12574e-14	-1.13838e-15	3.62093e-15
		5.5	-2.09865e-15	2.80375e-15	6.25775e-15	7.13606e-15	-2.69549e-15	3.40084e-15
		5.51	6.88542e-16	3.91282e-15	8.17472e-15	6.84158e-15	-2.41873e-15	2.22731e-15
		5.52	1.65188e-15	2.54662e-15	5.91676e-15	4.14256e-15	-7.2824e-15	4.07826e-15
		5.53	2.80167e-15	1.59316e-15	9.06394e-15	4.9235e-15	-1.14089e-15	3.60657e-15
		5.54	-9.10077e-17	5.04589e-15	6.95409e-15	5.64561e-15	-3.3556e-15	3.08554e-15
		5.55	2.79051e-15	4.04454e-15	1.70131e-15	3.44901e-15	-6.19536e-15	3.77325e-15
		5.56	1.57125e-15	3.52293e-15	-3.73329e-15	2.25567e-15	-1.03106e-15	3.38878e-15
		5.57	-5.13739e-16	3.26912e-15	7.6242e-15	4.20291e-15	1.24766e-15	3.21634e-15
		5.58	-4.31337e-16	3.7971e-15	1.1955e-14	6.74023e-15	3.58055e-15	3.63008e-15
		5.59	1.49793e-15	3.79986e-15	7.25175e-15	3.75507e-15	2.30773e-15	2.5357e-15
		5.6	5.0701e-15	4.48644e-15	6.9572e-15	7.90468e-15	7.52881e-16	3.98754e-15
		5.61	2.37126e-16	5.20698e-15	5.54378e-15	5.55955e-15	-3.59098e-15	2.922e-15
		5.62	-5.43602e-15	3.52193e-15	-5.60234e-15	2.07253e-15	-5.65663e-15	5.66654e-15
		5.63	-3.58384e-15	2.97405e-15	4.5452e-15	1.81966e-15	1.39276e-15	2.94963e-15
		5.64	-4.43367e-15	3.58517e-15	5.68621e-15	4.02819e-15	1.87422e-15	3.50918e-15
		5.65	-4.7348e-15	3.1667e-15	1.1941e-14	1.13216e-14	-4.33937e-15	5.24066e-15
		5.66	-1.15426e-16	3.16568e-15	1.32901e-14	7.48092e-15	-1.03802e-15	3.35734e-15
		5.67	-8.14781e-15	2.79721e-15	1.17081e-14	6.80943e-15	-1.03352e-15	2.8824e-15
		5.68	3.16977e-15	3.93015e-15	3.23227e-15	6.92758e-15	-1.47799e-16	2.42129e-15
		5.69	-1.9391e-15	4.32699e-15	7.80795e-15	4.09133e-15	1.49013e-15	5.65992e-15
		5.7	-6.06549e-15	4.61756e-15	5.81731e-15	6.49763e-15	-1.42945e-15	5.54522e-15
		5.71	-7.17177e-15	5.60202e-15	-2.18728e-15	2.64302e-15	-5.57403e-15	8.30857e-15
		5.72	-7.21297e-15	5.25595e-15	7.87964e-15	4.57979e-15	-1.08031e-15	5.4508e-15
		5.73	-6.47771e-15	3.85074e-15	8.1539e-15	5.15779e-15	2.29106e-15	4.81027e-15
		5.74	-3.33526e-15	4.4841e-15	1.44108e-14	1.14475e-14	-1.16238e-15	5.68364e-15
		5.75	-2.46532e-15	4.02937e-15	-3.33175e-15	4.27604e-15	-1.3886e-15	5.31321e-15
		5.76	1.23763e-15	4.29649e-15	4.85933e-15	9.54239e-15	-3.44683e-15	6.57548e-15
		5.77	-5.04208e-16	2.64935e-15	-2.29378e-15	1.24924e-15	-2.57161e-15	5.42099e-15
		5.78	-4.11709e-16	5.54898e-15	3.29476e-15	8.48042e-15	-2.37609e-15	5.36435e-15
		5.79	-2.35786e-15	2.77133e-15	-1.31627e-15	4.37575e-15	-3.32994e-15	3.74545e-15
		5.8	2.32297e-15	4.71805e-15	-2.78066e-15	3.19073e-15	-2.38316e-15	5.0453e-15
		5.81	-7.87734e-17	5.48551e-15	8.14296e-15	9.42691e-15	-4.07157e-15	6.69068e-15
		5.82	6.19305e-15	3.52715e-15	1.31637e-15	2.7341e-15	-3.3111e-15	3.65533e-15
		5.83	4.57951e-15	4.58274e-15	5.4939e-15	1.75361e-15	-3.19846e-15	5.84357e-15
		5.84	2.10776e-15	3.25873e-15	-5.32604e-16	5.94786e-15	3.34266e-15	5.22648e-15
		5.85	1.00331e-15	3.83586e-15	2.09472e-15	6.44442e-15	-4.62406e-15	6.02315e-15
		5.86	1.98764e-15	4.45569e-15	4.45956e-15	5.96974e-15	-3.09484e-16	6.46015e-15
		5.87	-4.80246e-15	5.26175e-15	1.01331e-15	6.64861e-15	2.87383e-16	4.00107e-15
		5.88	2.27716e-15	2.13141e-15	1.66483e-14	1.01734e-14	2.41612e-15	5.95779e-15
		5.89	-5.51659e-15	2.92214e-15	3.76308e-15	5.71164e-15	-2.37394e-15	6.2403e-15
		5.9	-1.43896e-15	3.64287e-15	8.65516e-15	8.82276e-15	-3.2956e-16	6.99467e-15
		5.91	-1.16226e-15	2.09034e-15	5.02188e-15	4.8473e-15	-4.15789e-15	8.34305e-15
		5.92	-3.6173e-15	5.48569e-15	3.92349e-15	3.22695e-15	4.09449e-15	4.98003e-15
		5.93	-2.1949e-15	4.07344e-15	1.96694e-15	5.01639e-15	-2.26776e-15	8.28249e-15
		5.94	-5.56679e-15	2.59874e-15	8.99397e-15	6.89526e-15	-3.8994e-15	6.92312e-15
		5.95	-4.0456e-15	4.4101e-15	1.97619e-15	2.75181e-15	2.2976e-15	4.68853e-15
		5.96	1.84195e-15	4.06918e-15	-5.44463e-16	3.73754e-15	-1.81776e-15	8.25307e-15
		5.97	-1.21385e-15	3.90368e-15	1.69102e-14	1.05136e-14	-3.24424e-15	4.01928e-15
		5.98	-6.50616e-16	1.63885e-15	-2.4937e-15	6.88947e-15	-2.40233e-15	3.89005e-15
		5.99	3.9212e-15	2.62136e-15	3.48964e-15	2.50609e-15	-7.31249e-15	7.15912e-15
		6	-2.15864e-15	3.11725e-15	5.05914e-15	3.31409e-15	-8.00613e-15	6.17847e-15
		6.01	-2.44812e-16	2.34036e-15	-3.6789e-16	9.77965e-16	-7.15862e-15	5.93656e-15
		6.02	-4.88049e-15	4.00116e-15	6.09375e-15	5.0396e-15	-5.81606e-15	6.9876e-15
		6.03	-7.8911e-15	6.81941e-15	6.02833e-15	3.03716e-15	-3.65869e-15	5.01314e-15
		6.04	-6.57735e-15	4.48992e-15	-6.13217e-15	6.7908e-15	-5.72866e-15	2.89898e-15
		6.05	-9.61059e-16	2.71439e-15	-2.37566e-15	3.15648e-15	-8.91346e-15	6.12639e-15
		6.06	-2.61575e-15	2.30556e-15	8.9291e-15	3.67809e-15	-5.12168e-15	5.28169e-15
		6.07	1.0147e-15	4.09322e-15	5.10668e-15	4.19611e-15	-7.18962e-15	5.76808e-15
		6.08	-1.74084e-15	3.44664e-15	9.28912e-15	4.96777e-15	-6.06313e-15	7.81722e-15
		6.09	-1.13454e-15	2.26718e-15	2.05823e-14	9.4564e-15	-4.00615e-15	3.66495e-15
		6.1	-1.28648e-15	2.71113e-15	1.79937e-15	6.38059e-15	-7.23983e-15	2.24261e-15
		6.11	-4.54061e-15	4.77937e-15	-7.38449e-15	6.19376e-15	-9.8592e-15	4.19784e-15
		6.12	-4.18259e-15	2.48053e-15	2.02594e-15	7.39637e-15	-1.05706e-14	6.89585e-15
		6.13	-4.51028e-15	3.45918e-15	4.19357e-15	4.80734e-15	-1.132e-14	6.35489e-15
		6.14	7.70434e-16	2.27037e-15	6.32178e-15	2.91698e-15	-1.33986e-14	6.17539e-15
		6.15	-1.03722e-15	2.11063e-15	8.61523e-15	8.64065e-15	-7.59861e-15	6.37906e-15
		6.16	-4.53404e-15	2.68845e-15	4.86712e-15	4.74682e-15	-1.2012e-14	7.82444e-15
		6.17	2.02821e-15	3.37307e-15	2.7694e-15	4.73411e-15	-1.21406e-14	7.40431e-15
		6.18	-3.67127e-15	3.42545e-15	1.27325e-15	4.48004e-15	-7.77019e-15	8.34145e-15
		6.19	3.51227e-17	2.33529e-15	8.03417e-15	8.30117e-15	-8.29417e-15	5.8355e-15
		6.2	-4.02332e-15	4.49695e-15	-7.24801e-16	4.96198e-15	-1.23149e-14	4.44781e-15
		6.21	1.18445e-15	4.66676e-15	5.04099e-15	7.62491e-15	-7.90673e-15	7.99682e-15
		6.22	-2.37002e-15	3.72052e-15	-4.63592e-15	2.64832e-15	-6.52668e-15	8.6005e-15
		6.23	-1.5962e-15	2.47714e-15	8.15695e-15	7.46328e-15	-7.80703e-15	6.19391e-15
		6.24	-1.04729e-15	2.9586e-15	1.56029e-15	7.52839e-15	-3.53439e-15	4.02406e-15
		6.25	-1.808e-15	4.25483e-15	-1.32184e-15	6.2192e-15	-6.16283e-15	5.81577e-15
		6.26	-2.52711e-15	4.12772e-15	-6.85507e-15	6.41584e-15	-2.66694e-15	3.90776e-15
		6.27	-1.4684e-15	3.9226e-15	6.71929e-15	7.95669e-15	-7.11636e-15	3.85287e-15
		6.28	-2.81468e-15	3.57225e-15	1.38043e-14	9.19697e-15	-7.27488e-15	5.07254e-15
		6.29	-7.45386e-15	2.45448e-15	3.59516e-15	2.50471e-15	-6.28704e-15	6.0217e-15
		6.3	-2.6064e-15	3.45133e-15	-8.66845e-15	4.09159e-15	-8.57322e-15	7.40916e-15
		6.31	-1.24877e-16	2.15099e-15	-1.23325e-15	5.33073e-15	-4.47056e-15	7.26523e-15
		6.32	-3.74994e-15	4.29888e-15	7.54725e-16	7.1574e-15	-9.15242e-15	5.38032e-15
		6.33	-2.97373e-15	4.9683e-15	-9.54778e-15	1.01351e-14	-9.40579e-15	6.64477e-15
		6.34	-5.50425e-15	3.32637e-15	8.57897e-15	8.42562e-15	-8.33044e-15	3.88542e-15
		6.35	-4.1843e-15	3.75176e-15	-5.62984e-15	7.95751e-15	-8.68472e-15	4.6872e-15
		6.36	-4.96599e-15	4.66873e-15	-1.12582e-15	4.723e-15	-9.30432e-15	5.04533e-15
		6.37	-5.44939e-15	3.07905e-15	-9.08076e-16	5.49445e-15	-5.98726e-15	3.48641e-15
		6.38	-2.55285e-16	4.00819e-15	-6.31975e-15	4.5624e-15	-2.24017e-15	3.94807e-15
		6.39	-9.93261e-15	2.14184e-15	-4.23641e-15	1.42219e-14	-7.42465e-15	2.79944e-15
		6.4	-8.3733e-16	1.441e-15	2.05844e-15	2.66187e-15	-3.75397e-15	4.23013e-15
		6.41	1.06525e-14	5.14142e-15	-4.13471e-15	3.75205e-15	-6.03891e-15	4.43433e-15
		6.42	-1.3411e-15	3.3948e-15	-2.32399e-15	2.58369e-15	-4.51158e-15	5.18304e-15
		6.43	5.1445e-15	4.63249e-15	3.59109e-15	3.78614e-15	-4.69768e-15	4.88125e-15
		6.44	-8.02077e-16	3.07165e-15	-2.51983e-15	6.88652e-15	-8.47265e-16	3.26909e-15
		6.45	-3.54563e-15	3.19551e-15	1.23423e-15	1.87126e-15	-4.02788e-15	2.55262e-15
		6.46	-1.19356e-15	4.07857e-15	-3.82086e-15	3.88553e-15	-5.74765e-15	3.31334e-15
		6.47	-5.23569e-16	2.54883e-15	-8.22576e-15	8.06215e-15	-5.79338e-15	4.14059e-15
		6.48	-9.68209e-16	3.61291e-15	-7.76819e-15	1.36407e-14	-1.66859e-15	5.16313e-15
		6.49	1.82933e-15	1.72225e-15	7.16794e-15	9.85813e-15	-7.6748e-16	3.62458e-15
		6.5	2.43597e-16	1.75094e-15	-1.60146e-15	2.45284e-15	-4.67487e-15	4.17268e-15
		6.51	-3.55494e-15	5.65701e-15	-6.06848e-15	2.91029e-15	-3.39318e-15	3.40495e-15
		6.52	-2.85785e-15	3.29523e-15	-4.57669e-15	7.96393e-15	-6.00583e-15	4.35806e-15
		6.53	1.11616e-15	3.90025e-15	-4.14746e-15	4.80458e-15	-3.05178e-15	4.06429e-15
		6.54	-3.09014e-15	5.43127e-15	-6.40285e-15	9.5303e-15	-3.11937e-15	2.10277e-15
		6.55	1.24012e-15	2.19581e-15	-3.4276e-15	6.15426e-15	-6.72873e-15	4.13446e-15
		6.56	-3.30033e-15	3.10256e-15	3.98166e-15	6.50566e-15	-5.50594e-15	3.01619e-15
		6.57	-6.70336e-15	5.12196e-15	2.16665e-15	7.55491e-15	-3.45035e-15	3.11336e-15
		6.58	-3.21162e-15	2.75249e-15	1.27651e-15	9.54028e-15	3.76149e-16	2.71864e-15
		6.59	-9.42103e-15	5.93197e-15	-7.09658e-16	4.97673e-15	-2.61259e-15	3.25554e-15
		6.6	-7.67288e-15	4.38807e-15	6.84655e-15	4.60197e-15	-7.12714e-15	3.69853e-15
		6.61	-7.15805e-15	4.55816e-15	4.80065e-15	7.40193e-15	-8.615e-15	6.94129e-15
		6.62	-4.92432e-15	3.00581e-15	1.98888e-15	8.06474e-15	-7.71542e-15	5.79135e-15
		6.63	-4.25188e-15	5.42736e-15	-1.04868e-14	1.0027e-14	-3.48407e-15	3.09075e-15
		6.64	-5.02289e-15	2.48841e-15	-7.40725e-15	1.44159e-14	-7.36143e-15	4.80631e-15
		6.65	-7.22797e-15	4.66085e-15	-4.98236e-15	3.00824e-15	-2.96771e-15	2.93461e-15
		6.66	-5.29243e-15	3.73242e-15	-5.1345e-15	4.9629e-15	-4.35254e-15	2.76866e-15
		6.67	-4.13042e-15	1.96845e-15	-1.09402e-14	1.04853e-14	-6.0309e-15	5.03696e-15
		6.68	-3.59428e-15	4.71341e-15	2.34078e-15	6.84199e-15	-4.18671e-15	5.71289e-15
		6.69	-3.53313e-15	3.05348e-15	-9.49377e-15	1.25907e-14	-2.45211e-16	3.85463e-15
		6.7	-7.03726e-15	5.19133e-15	-5.13962e-15	8.93965e-15	-5.30135e-15	5.42607e-15
		6.71	-5.1222e-15	7.82588e-15	4.38645e-15	3.47362e-15	-8.74978e-16	3.90731e-15
		6.72	-2.20751e-15	4.28307e-15	-7.13903e-15	3.07414e-15	-6.94878e-15	5.88586e-15
		6.73	-2.87958e-15	4.04412e-15	-5.66735e-15	9.62346e-15	-5.14832e-15	4.11144e-15
		6.74	-5.14548e-15	4.79216e-15	-8.07368e-15	8.90387e-15	-2.22634e-16	3.86526e-15
		6.75	-1.54344e-15	2.1549e-15	-6.22246e-15	7.0177e-15	-5.56371e-15	5.23278e-15
		6.76	-1.83383e-15	4.40991e-15	-2.74906e-15	3.12422e-15	2.02845e-15	4.13562e-15
		6.77	-2.58341e-15	4.99325e-15	-4.36811e-15	5.25188e-15	-2.2553e-15	3.07722e-15
		6.78	3.8309e-15	2.3078e-15	-1.16417e-14	1.1882e-14	-1.16572e-15	2.86462e-15
		6.79	-6.31233e-15	5.32622e-15	4.57083e-16	4.8683e-15	-4.17445e-17	3.10379e-15
		6.8	-3.38258e-15	3.0626e-15	-6.55666e-15	6.64638e-15	-3.02671e-15	2.98442e-15
		6.81	-8.48196e-15	6.90849e-15	-6.4111e-15	3.49761e-15	-7.53165e-15	2.54292e-15
		6.82	-8.97757e-15	5.01396e-15	-1.30466e-14	9.13434e-15	-4.10668e-15	7.34632e-15
		6.83	-7.35097e-15	5.81852e-15	-1.69634e-14	7.80224e-15	-3.66413e-15	7.57271e-15
		6.84	-7.91643e-15	4.73717e-15	-1.40427e-14	7.40464e-15	-2.95924e-15	2.89148e-15
		6.85	-8.7771e-15	5.18708e-15	-1.73612e-14	8.3877e-15	2.13685e-15	3.71242e-15
		6.86	-6.39556e-15	4.98293e-15	-3.693e-15	1.12556e-14	-1.79646e-15	3.96196e-15
		6.87	-2.11648e-15	5.03307e-15	-1.63534e-14	7.24081e-15	-3.17607e-15	5.45475e-15
		6.88	-2.40002e-15	5.06287e-15	-1.53236e-14	1.56585e-14	-9.88868e-16	5.0539e-15
		6.89	-6.21377e-15	4.89413e-15	-6.16278e-15	4.09244e-15	3.72159e-15	7.88926e-15
		6.9	-2.89993e-15	2.88908e-15	-4.25626e-15	4.45878e-15	-3.65419e-15	3.9957e-15
		6.91	-4.52327e-15	7.98069e-15	-4.25461e-15	7.54736e-15	-9.09153e-17	5.44834e-15
		6.92	-5.75295e-15	3.26226e-15	-5.3552e-15	5.60109e-15	-1.44667e-15	5.7989e-15
		6.93	-4.04358e-15	6.75161e-15	-2.48441e-15	6.6001e-15	-1.12617e-15	5.88367e-15
		6.94	-8.35501e-15	6.69631e-15	-7.47278e-15	1.23462e-14	-1.1414e-15	5.87039e-15
		6.95	-3.84612e-15	8.10066e-15	7.52969e-16	1.13621e-14	3.0138e-15	5.25608e-15
		6.96	-1.58678e-15	6.35907e-15	-7.71232e-15	4.23864e-15	1.79562e-15	5.64469e-15
		6.97	-2.3983e-15	5.80057e-15	-3.84667e-15	7.11124e-15	1.64787e-15	5.77566e-15
		6.98	-5.4075e-15	7.66474e-15	-8.89217e-15	7.30176e-15	6.32232e-17	7.92227e-15
		6.99	-8.68063e-15	5.56757e-15	-5.87657e-15	5.80192e-15	6.5448e-16	8.07803e-15
		7	-1.08711e-14	5.95488e-15	-5.68289e-15	1.68059e-15	1.09351e-15	5.20894e-15
		7.01	-9.71869e-15	3.52257e-15	-5.20623e-16	2.52082e-15	-6.51009e-16	5.15002e-15
		7.02	-1.06153e-14	6.99789e-15	-1.01234e-14	4.80522e-15	2.33119e-16	4.88975e-15
		7.03	-7.68808e-15	3.54432e-15	-8.24517e-15	9.60683e-15	1.59082e-15	6.78159e-15
		7.04	-4.00212e-15	4.87811e-15	5.36121e-16	6.00007e-15	1.37058e-15	6.52933e-15
		7.05	-4.13318e-15	4.32068e-15	-7.28157e-15	4.66051e-15	2.02246e-15	8.66701e-15
		7.06	-7.17327e-15	4.07348e-15	3.96597e-15	2.31208e-15	1.26767e-16	5.21314e-15
		7.07	-1.76601e-15	5.63192e-15	6.20785e-15	5.82815e-15	6.29126e-16	8.308e-15
		7.08	-6.51554e-15	6.68946e-15	-1.06337e-14	1.14858e-14	3.87044e-15	7.37528e-15
		7.09	-2.34842e-15	4.43923e-15	6.71611e-16	3.63549e-15	2.10489e-15	8.70233e-15
		7.1	-6.37817e-15	5.16254e-15	-8.50876e-15	7.0759e-15	6.13669e-15	6.39083e-15
		7.11	-7.57317e-15	3.54919e-15	-2.41204e-15	7.39204e-15	3.81008e-15	7.17643e-15
		7.12	-4.23196e-15	3.98501e-15	-7.55589e-15	5.88256e-15	4.03839e-15	8.27138e-15
		7.13	-8.35551e-15	4.53562e-15	-1.6356e-14	1.29723e-14	1.50993e-15	9.76476e-15
		7.14	-2.49167e-15	3.137e-15	-1.02104e-14	5.89125e-15	1.86469e-15	5.57889e-15
		7.15	-8.59488e-16	6.46605e-15	-1.01006e-14	4.81056e-15	2.28529e-15	5.6926e-15
		7.16	-4.67179e-15	4.76863e-15	2.20275e-15	3.26056e-15	7.99535e-16	6.74534e-15
		7.17	-5.16883e-15	4.582e-15	3.03809e-15	6.43383e-15	3.95455e-15	9.48789e-15
		7.18	-4.60765e-15	1.47419e-15	5.23643e-15	5.41929e-15	3.67911e-15	8.56973e-15
		7.19	-9.31505e-15	4.96823e-15	-2.09287e-15	4.75929e-15	4.26451e-15	9.52176e-15
		7.2	-6.90115e-16	1.95044e-15	5.66182e-15	6.66151e-15	5.08679e-15	6.91755e-15
		7.21	6.37901e-16	3.09212e-15	1.50426e-15	3.42202e-15	3.18974e-15	9.19764e-15
		7.22	-3.7951e-15	3.06803e-15	-1.9703e-15	4.7604e-15	4.59191e-15	9.79022e-15
		7.23	-4.98626e-15	2.38731e-15	-1.20845e-15	1.02673e-14	5.59342e-15	8.57979e-15
		7.24	-4.34085e-15	3.84074e-15	4.68794e-15	3.99882e-15	7.01314e-15	9.35534e-15
		7.25	-3.05407e-15	2.01982e-15	-3.92005e-15	4.65353e-15	7.08448e-15	8.32997e-15
		7.26	-3.74996e-16	2.80204e-15	2.15983e-15	3.92752e-15	6.64065e-15	7.76161e-15
		7.27	-7.35687e-15	3.83416e-15	2.95208e-15	3.13508e-15	6.91898e-15	7.49344e-15
		7.28	-7.60822e-15	3.65276e-15	3.33747e-15	1.27988e-15	3.28513e-15	1.07794e-14
		7.29	-1.87543e-15	2.50324e-15	-5.7736e-15	5.36951e-15	9.33023e-15	9.25143e-15
		7.3	-1.31787e-15	3.36816e-15	-5.93453e-15	1.33764e-14	3.54318e-15	1.24135e-14
		7.31	-8.30762e-15	4.4822e-15	-1.79385e-14	1.26065e-14	6.21496e-15	9.53421e-15
		7.32	-4.98924e-15	3.97812e-15	-1.21722e-14	4.21964e-15	6.76157e-15	1.08403e-14
		7.33	-3.33614e-15	5.58552e-15	-2.15606e-15	5.82248e-15	8.36453e-15	9.46523e-15
		7.34	-4.73778e-15	4.15646e-15	-1.25175e-14	9.70933e-15	6.81696e-15	9.95437e-15
		7.35	-2.46663e-15	4.61221e-15	-3.34119e-15	4.42554e-15	8.94267e-15	7.97147e-15
		7.36	-6.99338e-17	3.32707e-15	-4.71581e-15	4.58836e-15	5.7999e-15	1.17992e-14
		7.37	3.30357e-15	3.22244e-15	-3.05106e-15	8.21022e-15	5.44533e-15	1.2625e-14
		7.38	2.06851e-15	4.23427e-15	5.61074e-16	4.96785e-15	7.91357e-15	9.79378e-15
		7.39	-1.26822e-15	4.01076e-15	2.35731e-15	6.01871e-15	8.32373e-15	7.17141e-15
		7.4	-1.92931e-15	7.07054e-15	-1.25558e-14	6.62997e-15	8.55304e-15	9.61357e-15
		7.41	1.5899e-15	6.02657e-15	3.189e-15	5.48568e-15	5.7056e-15	8.59371e-15
		7.42	-2.61557e-15	3.90606e-15	6.05095e-15	2.21719e-15	4.64244e-15	1.03149e-14
		7.43	9.90007e-16	4.10115e-15	-5.422e-16	2.64382e-15	7.90913e-15	8.31264e-15
		7.44	-4.23297e-15	3.91926e-15	4.25224e-15	5.65894e-15	6.0716e-15	8.8015e-15
		7.45	8.52983e-16	3.99253e-15	6.27043e-15	3.47592e-15	6.7306e-15	7.76568e-15
		7.46	-8.18613e-15	4.43655e-15	2.32357e-15	4.22736e-15	8.39418e-15	9.5272e-15
		7.47	-6.00032e-15	6.01865e-15	-5.65038e-15	1.20899e-14	5.62965e-15	1.02725e-14
		7.48	-5.24596e-15	4.61489e-15	1.99102e-15	5.4415e-15	6.21323e-15	8.06292e-15
		7.49	-2.96868e-15	2.6384e-15	-1.71138e-15	3.48549e-15	-3.32517e-17	1.05323e-14
		7.5	-3.53873e-15	3.40103e-15	-1.59024e-15	4.00667e-15	3.71582e-15	7.2133e-15
		7.51	-7.62035e-15	3.24629e-15	3.74184e-15	6.65574e-15	5.43316e-15	6.07374e-15
		7.52	-6.54798e-15	2.30452e-15	5.32161e-15	1.85057e-15	3.85168e-15	9.42967e-15
		7.53	-2.96484e-15	4.44072e-15	-1.67505e-15	8.79498e-15	6.34703e-15	8.40894e-15
		7.54	-5.60359e-15	2.11307e-15	-3.12439e-15	2.18772e-15	6.44661e-15	8.28844e-15
		7.55	-4.48367e-15	3.29108e-15	-6.16691e-16	6.56391e-15	4.9376e-15	8.19802e-15
		7.56	-8.80379e-15	2.55881e-15	1.00944e-15	5.5189e-15	4.53091e-15	6.85595e-15
		7.57	-6.35304e-15	4.01556e-15	-7.50991e-16	7.06799e-15	4.03494e-15	8.72027e-15
		7.58	-6.45999e-15	4.46613e-15	2.18591e-15	5.94878e-15	2.63115e-15	1.02089e-14
		7.59	-5.2306e-15	4.16215e-15	-1.02741e-14	1.01101e-14	3.95704e-15	7.36096e-15
		7.6	-5.2288e-15	7.23658e-15	7.07151e-17	6.58811e-15	4.53109e-15	6.92842e-15
		7.61	-3.16237e-15	5.88732e-15	-5.38374e-16	5.04566e-15	2.88267e-15	6.70837e-15
		7.62	-9.44789e-15	5.82632e-15	2.71787e-15	1.30231e-15	2.00922e-15	8.06405e-15
		7.63	-5.54484e-15	4.70562e-15	-5.85358e-15	7.1924e-15	5.59628e-15	4.7708e-15
		7.64	-5.66053e-15	2.28379e-15	1.68908e-15	4.94902e-15	2.80334e-15	5.81722e-15
		7.65	-5.01275e-15	3.40745e-15	3.46893e-15	3.76328e-15	4.96581e-15	1.04744e-14
		7.66	-7.28946e-15	6.62947e-15	1.22551e-15	3.52577e-15	2.99579e-15	1.04526e-14
		7.67	-2.95055e-15	3.83914e-15	1.75732e-15	5.26228e-15	6.69828e-15	9.72121e-15
		7.68	-4.10425e-15	2.8719e-15	2.41091e-15	2.03516e-15	3.88257e-15	9.99047e-15
		7.69	-6.56979e-15	5.81337e-15	-4.05412e-15	6.46227e-15	3.79173e-15	1.20221e-14
		7.7	-6.89341e-15	3.97265e-15	5.0302e-15	7.14083e-15	4.56334e-15	9.10235e-15
		7.71	-4.11198e-15	6.24221e-15	4.5896e-15	3.32032e-15	1.46556e-15	1.0091e-14
		7.72	-5.90206e-15	3.44105e-15	-2.50264e-16	5.73426e-15	6.27304e-16	9.77335e-15
		7.73	-1.19222e-14	9.411e-15	-1.35084e-14	1.04935e-14	-2.49351e-15	9.76253e-15
		7.74	-8.19277e-15	3.35246e-15	-9.47986e-15	5.72332e-15	5.1922e-16	7.97047e-15
		7.75	-8.71536e-15	5.00083e-15	4.71341e-15	3.64687e-15	6.41434e-16	7.20129e-15
		7.76	-1.05135e-14	6.56341e-15	4.42308e-15	2.51376e-15	1.23636e-15	6.63761e-15
		7.77	-5.32761e-15	2.91348e-15	-2.09356e-15	4.09617e-15	2.24496e-15	6.73394e-15
		7.78	-5.61187e-15	3.70272e-15	1.05162e-14	2.25328e-15	7.31014e-16	5.6011e-15
		7.79	-8.1799e-15	4.10515e-15	8.13031e-15	4.71549e-15	2.5101e-15	8.17573e-15
		7.8	-7.5854e-15	2.48968e-15	-3.69046e-15	2.90882e-15	-1.51068e-15	8.85376e-15
		7.81	-5.73041e-15	1.84107e-15	9.45048e-16	2.71459e-15	8.43588e-16	6.06148e-15
		7.82	-9.4632e-15	6.34444e-15	6.27139e-16	1.89492e-15	-2.22659e-15	7.63045e-15
		7.83	-1.78398e-15	3.79981e-15	2.49126e-15	4.27725e-15	-8.06013e-16	6.94391e-15
		7.84	-1.02915e-14	7.23266e-15	-4.84352e-15	7.70653e-15	-8.41013e-16	7.53718e-15
		7.85	-4.37889e-15	4.0347e-15	-7.65657e-15	3.28189e-15	4.11617e-15	4.83472e-15
		7.86	-1.05768e-14	6.58573e-15	-1.76317e-15	7.32685e-15	-4.49486e-15	7.33454e-15
		7.87	-4.69506e-15	2.17372e-15	1.33443e-15	2.06291e-15	4.72204e-16	7.56967e-15
		7.88	-4.66884e-15	3.42657e-15	9.99263e-16	5.08048e-15	3.5843e-15	7.48897e-15
		7.89	-5.44501e-15	2.7276e-15	-3.60279e-15	2.67614e-15	-4.61572e-17	6.84856e-15
		7.9	-3.70469e-15	2.1359e-15	-2.29892e-15	4.99223e-15	-2.56034e-15	7.22762e-15
		7.91	1.08685e-15	2.46661e-15	5.00957e-16	3.92182e-15	-1.2636e-15	6.03943e-15
		7.92	-3.04521e-16	3.28556e-15	3.75891e-15	4.80491e-15	-1.12758e-16	5.88157e-15
		7.93	-3.44131e-15	4.03727e-15	1.12663e-15	1.28762e-14	1.41268e-15	5.82121e-15
		7.94	-2.2376e-15	2.84918e-15	1.02493e-14	9.40827e-15	-2.41574e-15	5.53463e-15
		7.95	-4.11953e-15	5.70778e-15	7.70776e-15	5.13e-15	-7.05147e-16	5.49518e-15
		7.96	-5.0331e-15	6.7538e-15	4.70761e-15	4.92472e-15	3.60041e-15	4.52225e-15
		7.97	-2.72153e-15	1.62564e-15	5.7027e-15	6.59067e-15	-1.06803e-16	2.09091e-15
		7.98	-2.99688e-15	7.11269e-15	1.32338e-15	2.31984e-15	-4.1782e-15	7.36383e-15
		7.99	-9.40376e-15	6.47385e-15	1.08287e-15	3.02752e-15	5.11554e-16	5.26658e-15
		8	-6.19197e-15	6.91218e-15	-6.12848e-15	4.77156e-15	-5.22921e-15	7.5347e-15
		8.01	-1.89158e-15	5.0132e-15	-3.76707e-15	7.80536e-15	9.66368e-16	5.21165e-15
		8.02	1.68298e-15	4.20056e-15	7.25815e-15	6.63281e-15	-1.19104e-15	6.81359e-15
		8.03	-3.81688e-15	6.25441e-15	-3.70589e-15	2.57178e-15	7.03159e-17	4.29503e-15
		8.04	-4.45115e-15	4.36304e-15	1.51122e-15	7.02112e-15	-5.77011e-15	8.0804e-15
		8.05	-1.01316e-15	4.32819e-15	1.61837e-15	5.76471e-15	-2.76607e-15	5.12502e-15
		8.06	-3.93183e-15	3.30933e-15	-1.28547e-14	8.47165e-15	-1.94283e-15	5.95957e-15
		8.07	-2.61585e-15	5.55243e-15	-8.75548e-15	8.39551e-15	2.93373e-15	6.36767e-15
		8.08	-1.12493e-14	6.15799e-15	-1.10517e-15	8.00381e-15	-3.72823e-15	8.84261e-15
		8.09	-5.70347e-15	3.73996e-15	1.35321e-14	8.92306e-15	-3.27159e-16	5.76833e-15
		8.1	-7.11394e-15	4.84747e-15	3.65408e-15	5.92303e-15	-5.66906e-15	6.05316e-15
		8.11	-1.27579e-14	7.66208e-15	-2.5093e-16	3.74927e-15	-1.98442e-16	5.74856e-15
		8.12	-9.3822e-15	5.5425e-15	3.98521e-15	7.80404e-15	-2.22329e-15	5.71696e-15
		8.13	-3.86305e-15	2.74405e-15	-7.73201e-16	2.53362e-15	-5.81764e-15	5.19085e-15
		8.14	-3.22621e-15	4.56713e-15	-3.13724e-15	4.97818e-15	-5.17056e-15	7.56978e-15
		8.15	-5.42967e-15	2.87515e-15	3.42981e-15	2.35579e-15	-2.72519e-15	8.69063e-15
		8.16	-8.40743e-15	3.39698e-15	2.14157e-15	6.22376e-15	7.38288e-16	7.1236e-15
		8.17	-8.54404e-15	5.73286e-15	-2.73801e-15	5.04615e-15	1.35062e-15	6.72983e-15
		8.18	-7.27521e-15	4.49771e-15	-3.18369e-16	4.02137e-15	-4.33678e-16	8.40379e-15
		8.19	-4.9206e-15	3.25588e-15	8.42204e-15	7.55237e-15	-1.80171e-15	5.84406e-15
		8.2	-3.04649e-15	3.14819e-15	-6.028e-15	7.91624e-15	2.65695e-15	6.24713e-15
		8.21	-8.59451e-15	4.34589e-15	5.56212e-15	1.01999e-14	-1.12824e-15	4.86698e-15
		8.22	-1.45049e-14	7.43477e-15	3.56082e-15	4.65219e-15	2.8922e-15	6.447e-15
		8.23	-9.82964e-15	4.18881e-15	3.38324e-15	5.9537e-15	6.53401e-15	6.49506e-15
		8.24	-6.94662e-15	3.89709e-15	6.85995e-15	4.40254e-15	2.8417e-15	5.69359e-15
		8.25	-6.61414e-15	4.35892e-15	2.75796e-15	5.85434e-15	-2.87634e-15	8.44095e-15
		8.26	-1.20733e-14	3.31275e-15	1.05579e-14	1.08923e-14	2.42801e-15	9.00303e-15
		8.27	-4.42077e-15	1.75475e-15	-2.14619e-15	8.02534e-15	5.4257e-16	3.99041e-15
		8.28	-1.00802e-14	8.11398e-15	5.15791e-17	4.75752e-15	8.0212e-16	6.42338e-15
		8.29	-1.06674e-14	3.89304e-15	9.06997e-15	1.22035e-14	-1.09306e-15	8.48934e-15
		8.3	-1.38201e-14	4.97058e-15	2.22444e-15	4.05354e-15	2.38084e-15	7.03327e-15
		8.31	-5.61495e-15	5.65205e-15	-4.79539e-16	4.24e-15	3.09305e-15	6.32787e-15
		8.32	-4.79675e-15	2.8611e-15	3.57248e-15	5.71544e-15	4.34299e-15	5.98702e-15
		8.33	-1.76815e-15	5.22881e-15	4.39526e-15	5.66664e-15	2.20642e-15	7.58216e-15
		8.34	-5.61214e-15	5.09607e-15	1.13724e-15	7.88405e-15	-2.8318e-15	9.75327e-15
		8.35	-3.58479e-15	4.12694e-15	-1.07921e-15	7.30843e-15	-2.34654e-15	8.76517e-15
		8.36	-4.17212e-15	3.29595e-15	5.07113e-15	4.54838e-15	1.01379e-15	7.59163e-15
		8.37	-5.37988e-15	5.80359e-15	5.42629e-15	1.02537e-14	-9.44218e-16	5.55881e-15
		8.38	-8.17458e-15	7.71977e-15	-5.57262e-15	9.07751e-15	-1.62837e-15	6.58034e-15
		8.39	-9.88267e-15	7.64328e-15	2.25896e-15	4.09965e-15	-2.08307e-16	9.1834e-15
		8.4	-4.94459e-15	5.96264e-15	6.00988e-15	6.31586e-15	2.5714e-15	9.43925e-15
		8.41	-5.04617e-15	5.45378e-15	-9.52294e-15	1.21197e-14	1.06838e-14	7.81042e-15
		8.42	-6.11097e-15	6.59122e-15	3.75301e-15	7.94224e-15	3.90316e-15	6.96231e-15
		8.43	-3.77986e-15	5.68794e-15	-3.27487e-15	8.10488e-15	1.665e-15	6.69863e-15
		8.44	-5.93806e-15	7.22901e-15	4.72698e-15	4.74748e-15	-4.34648e-15	1.02205e-14
		8.45	-2.77178e-15	5.55848e-15	-1.16826e-14	9.09544e-15	1.52636e-15	9.84559e-15
		8.46	-3.41548e-15	6.45562e-15	-7.17968e-15	6.19004e-15	2.61319e-15	5.90914e-15
		8.47	2.32202e-15	6.0814e-15	-6.01836e-15	4.23129e-15	2.30619e-15	9.42355e-15
		8.48	-3.42269e-15	6.84759e-15	-3.87799e-15	8.62722e-15	3.47969e-15	5.0134e-15
		8.49	-2.9969e-16	5.61774e-15	-5.4221e-17	1.07365e-14	-8.14185e-16	8.83887e-15
		8.5	-7.81393e-15	8.19752e-15	-1.56508e-15	6.5556e-15	5.66026e-15	7.85892e-15
		8.51	-6.66337e-15	5.83709e-15	-3.06865e-15	4.51719e-15	2.11329e-15	1.10761e-14
		8.52	-2.90212e-15	4.94652e-15	8.27225e-15	8.05374e-15	2.96236e-15	5.62992e-15
		8.53	-3.57764e-15	7.37918e-15	-6.61934e-15	7.74133e-15	5.89244e-15	1.00122e-14
		8.54	-8.24611e-15	9.10538e-15	3.2361e-15	7.33111e-15	4.25066e-15	6.43817e-15
		8.55	-7.25734e-15	7.65695e-15	5.01411e-15	1.16806e-14	5.61806e-15	6.57471e-15
		8.56	-9.4932e-15	1.04801e-14	5.13498e-15	7.87713e-15	4.1141e-15	8.78534e-15
		8.57	-1.12213e-15	7.73432e-15	2.60464e-15	9.04238e-15	6.22189e-15	9.04034e-15
		8.58	-4.85147e-15	7.2629e-15	5.59058e-15	6.23257e-15	4.47598e-15	1.05175e-14
		8.59	-7.72263e-15	7.74029e-15	5.53654e-15	1.04324e-14	4.40189e-15	8.62571e-15
		8.6	-5.81653e-15	5.77427e-15	-5.92296e-15	8.75351e-15	2.63638e-15	1.16764e-14
		8.61	-7.96764e-15	7.55701e-15	4.26207e-15	8.56508e-15	3.21671e-15	8.91579e-15
		8.62	-7.36436e-15	5.96411e-15	-5.19625e-15	9.54346e-15	8.3507e-15	9.35951e-15
		8.63	-9.08745e-15	6.05101e-15	3.2771e-15	9.72122e-15	8.06646e-15	6.31013e-15
		8.64	-6.44818e-15	7.47167e-15	1.41052e-15	1.1785e-14	6.46707e-15	8.00189e-15
		8.65	-5.83313e-15	6.74689e-15	5.30211e-15	1.26345e-14	1.26185e-15	7.81077e-15
		8.66	-1.04206e-14	6.71861e-15	-3.70352e-16	1.20773e-14	4.28225e-15	1.00077e-14
		8.67	-1.04907e-14	5.71307e-15	5.81127e-15	1.33969e-14	4.27749e-15	9.36342e-15
		8.68	-4.691e-15	4.05412e-15	6.32757e-15	8.22247e-15	4.26623e-15	7.65934e-15
		8.69	-1.17112e-14	4.27345e-15	8.53469e-16	8.90872e-15	6.03217e-15	1.1452e-14
		8.7	-6.41709e-15	4.60672e-15	-4.21943e-15	7.34833e-15	4.65516e-15	8.72794e-15
		8.71	-1.03241e-14	5.38964e-15	-5.74913e-18	6.0754e-15	1.87519e-15	1.00472e-14
		8.72	-9.0574e-15	5.26076e-15	4.13752e-15	6.02509e-15	4.73398e-15	6.77764e-15
		8.73	-2.06338e-15	2.52103e-15	3.49432e-15	5.49641e-15	1.33237e-15	5.98654e-15
		8.74	-8.14686e-15	6.51749e-15	8.74664e-15	9.00346e-15	3.1479e-15	9.41049e-15
		8.75	-5.73018e-15	4.14735e-15	1.63374e-14	9.78028e-15	4.69781e-15	1.07493e-14
		8.76	-6.29626e-15	3.06899e-15	-1.35624e-15	8.84836e-15	5.01168e-15	7.29029e-15
		8.77	-1.0598e-14	4.01021e-15	2.59495e-15	1.09539e-14	8.07087e-15	7.18567e-15
		8.78	-7.65535e-15	3.61338e-15	1.76808e-15	8.69243e-15	7.41603e-15	6.57862e-15
		8.79	-1.54461e-15	5.35071e-15	1.97577e-14	1.67375e-14	6.69371e-15	6.52373e-15
		8.8	-3.47808e-15	2.81967e-15	8.44038e-16	8.27442e-15	3.18172e-15	9.71867e-15
		8.81	-5.06145e-15	4.40959e-15	-7.56111e-15	1.60991e-14	7.90423e-15	5.77236e-15
		8.82	-4.49899e-15	6.43236e-15	-7.77612e-15	1.00279e-14	4.88884e-15	7.6304e-15
		8.83	-8.68757e-15	3.00081e-15	2.9949e-15	1.17633e-14	9.53297e-15	7.48205e-15
		8.84	-8.19125e-15	6.08276e-15	3.09078e-15	5.58602e-15	7.34389e-15	8.78977e-15
		8.85	-9.36321e-15	5.32991e-15	6.85595e-15	1.09971e-14	4.31862e-15	1.09547e-14
		8.86	-3.41957e-15	4.40656e-15	4.31218e-15	1.11101e-14	6.46745e-15	7.67419e-15
		8.87	-9.54038e-15	7.751e-15	2.23855e-15	9.82475e-15	7.0101e-15	8.35945e-15
		8.88	-1.17954e-15	3.0961e-15	7.11092e-15	1.05189e-14	1.17779e-14	9.72849e-15
		8.89	-5.58808e-15	2.92512e-15	6.26856e-15	8.62951e-15	6.72253e-15	8.31463e-15
		8.9	-8.99897e-15	6.91588e-15	5.61369e-15	1.1551e-14	5.19636e-15	8.25911e-15
		8.91	-7.35027e-15	5.64172e-15	8.7966e-15	1.12615e-14	4.30804e-15	9.76388e-15
		8.92	-3.58833e-15	4.15494e-15	4.65986e-15	1.21023e-14	1.02592e-14	6.56795e-15
		8.93	-6.80548e-15	7.07683e-15	1.24255e-14	1.14965e-14	1.17219e-14	9.54949e-15
		8.94	-1.13892e-14	5.04284e-15	1.46556e-15	1.38898e-14	1.31023e-14	1.01184e-14
		8.95	-6.98811e-15	5.12615e-15	9.8529e-15	1.17831e-14	9.18651e-15	1.34102e-14
		8.96	-9.76334e-15	5.0923e-15	9.0453e-15	1.07289e-14	8.89706e-15	1.05181e-14
		8.97	-1.11729e-14	7.12331e-15	4.71679e-15	1.15217e-14	6.40879e-15	1.17879e-14
		8.98	-3.25943e-15	3.99793e-15	4.79506e-15	9.52188e-15	3.92234e-15	1.12838e-14
		8.99	-8.43254e-15	3.25026e-15	3.56765e-15	8.23261e-15	7.34742e-15	9.15918e-15
		9	-9.89557e-15	6.84421e-15	-1.63245e-15	6.85817e-15	3.40726e-15	1.03889e-14
		9.01	-1.0555e-14	4.10092e-15	1.00226e-14	9.51058e-15	6.95147e-15	1.0886e-14
		9.02	-5.9452e-15	5.47043e-15	1.10187e-14	9.63067e-15	5.50349e-15	8.44363e-15
		9.03	-1.43741e-14	7.43748e-15	1.09167e-14	1.07638e-14	3.72369e-15	1.20582e-14
		9.04	-8.4523e-15	4.66967e-15	1.06767e-14	9.83141e-15	9.91757e-15	8.76105e-15
		9.05	-6.60308e-15	2.89873e-15	1.95759e-15	8.34595e-15	2.7213e-15	1.08077e-14
		9.06	-7.71856e-15	5.66795e-15	8.77864e-15	8.76074e-15	9.71068e-15	6.70908e-15
		9.07	-1.1705e-14	6.43225e-15	2.62495e-15	8.55713e-15	4.33236e-15	7.56311e-15
		9.08	-1.46716e-14	5.20858e-15	-4.28844e-15	1.32849e-14	5.91112e-15	9.74267e-15
		9.09	-1.10721e-14	5.7616e-15	4.0779e-15	9.42811e-15	2.32308e-15	1.19792e-14
		9.1	-4.39857e-15	5.91452e-15	1.21299e-14	8.49014e-15	1.69256e-15	1.02788e-14
		9.11	-1.27253e-14	4.92892e-15	1.55304e-14	9.89498e-15	3.63009e-15	9.84581e-15
		9.12	-7.318e-15	2.23027e-15	-1.47723e-15	1.27828e-14	7.48023e-15	8.68491e-15
		9.13	-7.9934e-15	5.09708e-15	1.66055e-15	1.17902e-14	6.37137e-15	7.78882e-15
		9.14	-6.95899e-15	1.85068e-15	1.11688e-14	1.21681e-14	3.18271e-15	9.50507e-15
		9.15	-3.01731e-15	4.51654e-15	6.58394e-15	9.49911e-15	5.77765e-15	8.37778e-15
		9.16	-1.20474e-14	2.22383e-15	1.82442e-15	1.03079e-14	2.98338e-15	1.14416e-14
		9.17	-9.05687e-15	2.7067e-15	6.10621e-15	9.41105e-15	3.95799e-15	6.9284e-15
		9.18	-1.28068e-14	5.31248e-15	2.76076e-16	1.54585e-14	6.02533e-15	7.65607e-15
		9.19	-1.09694e-14	2.93891e-15	-9.22538e-15	1.32737e-14	6.58325e-15	7.81379e-15
		9.2	-1.06856e-14	3.63292e-15	-6.15561e-16	1.01127e-14	2.62455e-16	8.78655e-15
		9.21	-1.10521e-14	4.59127e-15	2.02769e-14	1.79815e-14	2.24844e-15	1.20386e-14
		9.22	-9.2067e-15	2.70622e-15	6.9426e-15	1.00111e-14	6.11565e-15	8.38999e-15
		9.23	-1.12436e-14	1.91499e-15	1.17858e-14	1.28954e-14	7.42231e-15	7.09248e-15
		9.24	-8.9014e-15	4.29755e-15	-4.89958e-16	1.5994e-14	3.77028e-15	1.04052e-14
		9.25	-1.57395e-14	9.45452e-15	2.37466e-15	1.10594e-14	-1.17886e-15	1.10814e-14
		9.26	-1.00027e-14	2.62284e-15	1.64556e-14	8.041e-15	6.01034e-15	7.76693e-15
		9.27	-1.18874e-14	4.6908e-15	-3.75002e-16	9.01306e-15	3.84235e-15	9.13409e-15
		9.28	-8.25661e-15	5.15395e-15	-1.12078e-15	1.07014e-14	5.12633e-16	1.16867e-14
		9.29	-1.44339e-14	5.0471e-15	5.29446e-16	9.55653e-15	3.77765e-15	1.1389e-14
		9.3	-9.22363e-15	7.26502e-15	8.11719e-15	1.00701e-14	1.32513e-15	8.99832e-15
		9.31	-1.49426e-14	3.17041e-15	9.84199e-15	1.37797e-14	1.20664e-15	9.64997e-15
		9.32	-1.49043e-14	5.61375e-15	1.74896e-15	5.73545e-15	5.36406e-15	1.21906e-14
		9.33	-1.38523e-14	6.10732e-15	7.65345e-15	9.98388e-15	4.92018e-15	9.1641e-15
		9.34	-8.60744e-15	3.25618e-15	-6.9416e-15	3.48768e-15	-1.51671e-15	9.81777e-15
		9.35	-1.39151e-14	6.28581e-15	8.67967e-16	9.41311e-15	3.73814e-15	1.1009e-14
		9.36	-1.08629e-14	5.43898e-15	5.37458e-15	9.65631e-15	2.5421e-15	1.02961e-14
		9.37	-1.17998e-14	6.61323e-15	9.69798e-15	1.48921e-14	-1.60551e-15	1.1337e-14
		9.38	-9.15282e-15	5.39074e-15	1.288e-14	1.12645e-14	-3.57663e-16	1.16178e-14
		9.39	-1.65242e-14	4.99002e-15	8.21841e-15	8.61674e-15	2.65669e-16	1.06145e-14
		9.4	-1.1396e-14	3.12347e-15	6.9656e-16	9.38937e-15	-1.62305e-15	9.13148e-15
		9.41	-1.3405e-14	2.67826e-15	4.41742e-15	9.77832e-15	1.79964e-15	1.18114e-14
		9.42	-1.04706e-14	3.90433e-15	-2.76288e-15	1.28527e-14	1.01397e-15	1.08582e-14
		9.43	-1.14206e-14	3.66802e-15	1.10689e-14	8.04623e-15	1.4013e-15	1.02344e-14
		9.44	-2.1151e-14	8.14483e-15	9.66296e-15	9.97764e-15	-1.06351e-15	1.16815e-14
		9.45	-8.68459e-15	5.24772e-15	4.35538e-15	1.2543e-14	-1.62607e-17	1.07121e-14
		9.46	-1.00123e-14	2.4516e-15	1.09032e-14	1.02612e-14	2.17523e-15	9.17061e-15
		9.47	-1.12457e-14	4.62155e-15	8.23716e-15	9.92849e-15	4.24269e-15	1.12214e-14
		9.48	-1.07606e-14	1.66941e-15	1.29358e-14	1.50039e-14	3.39184e-16	8.90276e-15
		9.49	-1.49247e-14	2.83879e-15	3.06544e-15	8.36677e-15	3.43195e-15	7.97355e-15
		9.5	-8.0206e-15	4.28045e-15	3.69634e-15	9.7603e-15	2.99786e-15	9.88554e-15
		9.51	-1.45931e-14	3.15669e-15	3.15987e-15	1.66626e-14	5.12995e-15	9.27955e-15
		9.52	-1.10968e-14	6.15985e-15	-7.50008e-16	1.2963e-14	1.70008e-15	1.03629e-14
		9.53	-1.44807e-14	7.21328e-15	-1.98771e-15	8.39577e-15	9.11874e-16	1.10687e-14
		9.54	-1.91421e-14	6.66099e-15	5.71969e-16	1.0876e-14	2.17292e-15	8.75828e-15
		9.55	-1.5235e-14	4.71585e-15	7.79698e-15	1.22163e-14	2.5869e-15	7.65487e-15
		9.56	-1.06213e-14	4.89222e-15	4.0423e-15	1.09287e-14	2.99174e-15	1.37317e-14
		9.57	-1.67736e-14	4.81409e-15	-1.02406e-15	1.23316e-14	6.63646e-15	1.0582e-14
		9.58	-1.22406e-14	4.01769e-15	3.32317e-15	1.17161e-14	7.09185e-15	9.36498e-15
		9.59	-1.12923e-14	5.89633e-15	6.30794e-16	1.14813e-14	2.47462e-15	1.07143e-14
		9.6	-1.46076e-14	6.80239e-15	9.68995e-15	1.41976e-14	6.72709e-15	7.39654e-15
		9.61	-1.61775e-14	5.3298e-15	3.094e-15	1.06012e-14	-5.8328e-16	1.14004e-14
		9.62	-1.03415e-14	4.32098e-15	2.26331e-15	1.3221e-14	-4.09043e-16	1.33893e-14
		9.63	-1.64646e-14	7.1321e-15	9.71981e-15	1.42283e-14	2.73232e-15	1.06436e-14
		9.64	-1.11093e-14	4.15944e-15	-9.9405e-16	8.15632e-15	3.19103e-15	1.24746e-14
		9.65	-5.2747e-15	3.70376e-15	8.82091e-15	1.45478e-14	3.03472e-15	1.21945e-14
		9.66	-1.10234e-14	3.54495e-15	-4.9904e-15	1.02279e-14	1.30404e-15	1.6048e-14
		9.67	-6.57145e-15	3.74626e-15	7.43765e-15	9.31962e-15	1.12449e-14	1.15776e-14
		9.68	-8.18416e-15	2.65191e-15	-1.94393e-16	1.09189e-14	1.17338e-14	1.01864e-14
		9.69	-1.3827e-14	4.27599e-15	6.36807e-15	1.25584e-14	1.03101e-14	1.09195e-14
		9.7	-1.69723e-14	5.0044e-15	4.12916e-15	1.36939e-14	9.1871e-15	1.21128e-14
		9.71	-5.32126e-15	3.70748e-15	-9.15363e-15	1.0853e-14	5.28864e-15	1.33994e-14
		9.72	-1.07147e-14	3.78283e-15	3.46027e-15	1.46437e-14	5.3617e-15	1.338e-14
		9.73	-1.01169e-14	4.71246e-15	-1.90103e-15	1.08477e-14	1.72137e-15	1.00187e-14
		9.74	-1.00283e-14	2.27862e-15	-3.15442e-15	1.06234e-14	1.08418e-14	9.9523e-15
		9.75	-1.26521e-14	3.34893e-15	-4.93696e-15	1.15115e-14	8.39905e-15	1.22541e-14
		9.76	-1.91343e-14	7.07014e-15	9.2112e-15	1.30289e-14	4.65711e-15	1.0075e-14
		9.77	-1.96115e-14	4.5062e-15	1.03364e-14	1.49466e-14	-5.08197e-16	1.21035e-14
		9.78	-1.48679e-14	5.91994e-15	9.13482e-15	1.44848e-14	4.30834e-15	9.60236e-15
		9.79	-1.27894e-14	1.51472e-15	-3.75982e-15	9.1847e-15	2.46088e-15	1.02888e-14
		9.8	-1.20837e-14	4.29014e-15	-4.91541e-15	1.23264e-14	4.94657e-15	1.01933e-14
		9.81	-1.43511e-14	6.5712e-15	-1.54741e-15	1.45419e-14	2.93778e-15	1.14069e-14
		9.82	-1.29726e-14	5.7676e-15	-2.2307e-15	1.04587e-14	6.02039e-15	1.11571e-14
		9.83	-8.44217e-15	2.46734e-15	-6.01003e-16	1.09973e-14	4.80378e-15	1.07426e-14
		9.84	-1.05355e-14	4.31116e-15	-2.97912e-15	9.31319e-15	4.9947e-15	1.31932e-14
		9.85	-1.48077e-14	3.37432e-15	-3.77806e-15	1.04673e-14	4.6115e-15	1.35206e-14
		9.86	-1.67449e-14	5.28122e-15	3.51777e-15	1.34461e-14	5.32381e-15	1.06682e-14
		9.87	-1.24537e-14	6.86715e-15	-4.74022e-15	1.02942e-14	5.11997e-15	1.20471e-14
		9.88	-1.57727e-14	6.82637e-15	2.10499e-16	1.2943e-14	8.84958e-15	8.67541e-15
		9.89	-1.51532e-14	3.92718e-15	1.22744e-15	7.78539e-15	2.18636e-15	1.25183e-14
		9.9	-1.17718e-14	5.13004e-15	5.84671e-15	1.26154e-14	6.33029e-15	1.16747e-14
		9.91	-1.72735e-14	6.8014e-15	3.64824e-15	9.34082e-15	1.60017e-15	1.38411e-14
		9.92	-1.78105e-14	8.40247e-15	-5.19332e-15	1.1045e-14	1.05157e-14	9.75606e-15
		9.93	-1.95943e-14	5.97785e-15	-3.47733e-15	1.09794e-14	2.5593e-15	7.68172e-15
		9.94	-1.33848e-14	2.68833e-15	1.02908e-14	1.52147e-14	5.87927e-15	1.28996e-14
		9.95	-1.70915e-14	7.86988e-15	4.48863e-15	1.11258e-14	5.81162e-15	1.26002e-14
		9.96	-1.94923e-14	8.14672e-15	4.3759e-15	1.55359e-14	8.16576e-15	1.30856e-14
		9.97	-1.10172e-14	3.90016e-15	-3.08879e-15	1.13754e-14	1.3721e-14	1.25143e-14
		9.98	-1.27241e-14	8.56057e-15	4.04212e-15	1.70962e-14	6.10038e-15	1.37422e-14
		9.99	-1.22156e-14	6.83469e-15	-5.04744e-15	1.32592e-14	1.13728e-14	1.28174e-14
		10
		10.01
		10.02
		10.03
		10.04
		10.05
		10.06
		10.07
		10.08
		10.09
		10.1
		10.11
		10.12
		10.13
		10.14
		10.15
		10.16
		10.17
		10.18
		10.19
		10.2
		10.21
		10.22
		10.23
		10.24
		10.25
		10.26
		10.27
		10.28	5.23466e-13	4.87195e-14	4.83395e-13	3.13736e-14	6.91053e-13	6.71544e-14
		10.29	4.98203e-13	4.70006e-14	4.47119e-13	2.58758e-14	6.51348e-13	6.33786e-14
		10.3	4.89093e-13	4.75794e-14	4.19815e-13	3.07541e-14	6.26294e-13	5.92349e-14
		10.31	4.85871e-13	4.58308e-14	4.08259e-13	3.49213e-14	6.10773e-13	5.92743e-14
		10.32
		10.33
		10.34
		10.35
		10.36
		10.37
		10.38	7.37589e-13	6.89764e-14	6.31827e-13	3.01099e-14	9.16759e-13	8.10948e-14
		10.39	7.26488e-13	6.54716e-14	5.9536e-13	2.63941e-14	8.84275e-13	8.09437e-14
		10.4	7.26517e-13	6.5354e-14	5.79527e-13	3.29463e-14	8.66286e-13	8.44402e-14
		10.41	7.32701e-13	6.44625e-14	5.77853e-13	3.15977e-14	8.53609e-13	8.80613e-14
		10.42
		10.43
		10.44
		10.45
		10.46
		10.47
		10.48	9.68459e-13	9.06039e-14	7.96975e-13	4.50068e-14	1.11759e-12	1.15481e-13
		10.49	9.56868e-13	8.7007e-14	7.73734e-13	4.01565e-14	1.07586e-12	1.14783e-13
		10.5	9.65309e-13	8.85523e-14	7.70286e-13	4.33507e-14	1.05611e-12	1.19493e-13
		10.51	9.69219e-13	8.93546e-14	7.5345e-13	4.28568e-14	1.04188e-12	1.22017e-13
		10.52
		10.53
		10.54
		10.55
		10.56
		10.57
		10.58	1.16428e-12	1.05645e-13	9.50592e-13	5.00868e-14	1.27139e-12	1.43568e-13
		10.59	1.14939e-12	1.04809e-13	9.13465e-13	4.94106e-14	1.23374e-12	1.45634e-13
		10.6	1.14191e-12	1.03073e-13	9.03564e-13	4.48982e-14	1.20711e-12	1.47888e-13
		10.61	1.1437e-12	1.03383e-13	9.00978e-13	4.54079e-14	1.1902e-12	1.53354e-13
		10.62
		10.63
		10.64
		10.65
		10.66
		10.67
		10.68	1.31736e-12	1.18716e-13	1.07704e-12	4.84868e-14	1.40119e-12	1.71501e-13
		10.69	1.30235e-12	1.18609e-13	1.03236e-12	5.28683e-14	1.36403e-12	1.74148e-13
		10.7	1.30828e-12	1.17643e-13	1.02171e-12	5.09016e-14	1.33805e-12	1.76441e-13
		10.71	1.30509e-12	1.16562e-13	1.01705e-12	5.21982e-14	1.32381e-12	1.80346e-13
		10.72
		10.73
		10.74
		10.75
		10.76
		10.77
		10.78	1.464e-12	1.30798e-13	1.18601e-12	5.3289e-14	1.51328e-12	1.95797e-13
		10.79	1.43886e-12	1.29637e-13	1.14246e-12	5.64283e-14	1.47261e-12	1.97829e-13
		10.8	1.43931e-12	1.28873e-13	1.17074e-12	6.60341e-14	1.45371e-12	2.02343e-13
		10.81	1.43837e-12	1.28714e-13	1.17067e-12	7.5008e-14	1.43646e-12	2.0579e-13
		10.82
		10.83
		10.84
		10.85
		10.86
		10.87
		10.88	1.59005e-12	1.44906e-13	1.3136e-12	8.42051e-14	1.60793e-12	2.12506e-13
		10.89	1.56007e-12	1.39299e-13	1.28502e-12	8.38113e-14	1.56488e-12	2.14487e-13
		10.9	1.56101e-12	1.40789e-13	1.26888e-12	8.98761e-14	1.54642e-12	2.19616e-13
		10.91	1.55767e-12	1.42298e-13	1.27241e-12	8.83867e-14	1.52964e-12	2.25308e-13
		10.92
		10.93
		10.94
		10.95
		10.96
		10.97
		10.98	1.68794e-12	1.5398e-13	1.42369e-12	9.70586e-14	1.70635e-12	2.34125e-13
		10.99	1.66351e-12	1.50056e-13	1.37152e-12	9.29954e-14	1.66237e-12	2.35304e-13
		11	1.66062e-12	1.48621e-13	1.35809e-12	9.30857e-14	1.64286e-12	2.36288e-13
		11.01	1.65247e-12	1.46082e-13	1.36052e-12	9.29213e-14	1.62154e-12	2.39466e-13
		11.02
		11.03
		11.04
		11.05
		11.06
		11.07
		11.08	1.76325e-12	1.5963e-13	1.49304e-12	9.71969e-14	1.77548e-12	2.43787e-13
		11.09	1.745e-12	1.56917e-13	1.45344e-12	1.00783e-13	1.73133e-12	2.44458e-13
		11.1	1.74187e-12	1.56171e-13	1.4251e-12	8.5557e-14	1.71194e-12	2.48741e-13
		11.11	1.73612e-12	1.54934e-13	1.43782e-12	1.02737e-13	1.69447e-12	2.54065e-13
		11.12
		11.13
		11.14
		11.15
		11.16
		11.17
		11.18	1.83537e-12	1.65186e-13	1.55652e-12	1.05844e-13	1.84869e-12	2.53953e-13
		11.19	1.80748e-12	1.61402e-13	1.52407e-12	1.12028e-13	1.81322e-12	2.57128e-13
		11.2	1.80346e-12	1.60461e-13	1.50711e-12	1.043e-13	1.77583e-12	2.58606e-13
		11.21	1.79989e-12	1.61108e-13	1.50297e-12	1.06305e-13	1.75885e-12	2.61552e-13
		11.22	1.79749e-12	1.61224e-13	1.49149e-12	9.72863e-14	1.74595e-12	2.66749e-13
		11.23	1.79487e-12	1.60307e-13	1.4851e-12	1.03853e-13	1.72786e-12	2.67659e-13
		11.24	1.79847e-12	1.61409e-13	1.49509e-12	1.13028e-13	1.71699e-12	2.72181e-13
		11.25	1.79371e-12	1.60897e-13	1.48052e-12	1.00651e-13	1.70692e-12	2.73485e-13
		11.26	1.79328e-12	1.59491e-13	1.48313e-12	1.02146e-13	1.70042e-12	2.76501e-13
		11.27	1.79354e-12	1.59757e-13	1.47445e-12	1.08717e-13	1.68783e-12	2.74662e-13
		11.28	1.78708e-12	1.59528e-13	1.46829e-12	1.02317e-13	1.68077e-12	2.78741e-13
		11.29	1.78827e-12	1.602e-13	1.45866e-12	9.78956e-14	1.67333e-12	2.79761e-13
		11.3	1.7887e-12	1.60161e-13	1.46759e-12	1.11656e-13	1.66585e-12	2.83815e-13
		11.31	1.7819e-12	1.56263e-13	1.45354e-12	1.04491e-13	1.65671e-12	2.84027e-13
		11.32	1.78349e-12	1.58764e-13	1.45297e-12	1.06526e-13	1.64679e-12	2.89487e-13
		11.33	1.78125e-12	1.58193e-13	1.44761e-12	1.02994e-13	1.64346e-12	2.90434e-13
		11.34	1.78094e-12	1.57759e-13	1.45015e-12	1.03939e-13	1.63712e-12	2.89201e-13
		11.35	1.77942e-12	1.5763e-13	1.4399e-12	1.03128e-13	1.62677e-12	2.94156e-13
		11.36	1.77879e-12	1.57643e-13	1.43965e-12	1.00714e-13	1.61211e-12	2.91943e-13
		11.37	1.77015e-12	1.56414e-13	1.42985e-12	1.02764e-13	1.61164e-12	2.93611e-13
		11.38	1.7624e-12	1.56575e-13	1.42593e-12	9.89232e-14	1.60088e-12	2.93636e-13
		11.39	1.76018e-12	1.54448e-13	1.42783e-12	1.05888e-13	1.59148e-12	2.9485e-13
		11.4	1.76018e-12	1.56179e-13	1.41586e-12	1.03073e-13	1.58423e-12	2.9536e-13
		11.41	1.7586e-12	1.57666e-13	1.40921e-12	1.05615e-13	1.57839e-12	2.96572e-13
		11.42	1.75476e-12	1.54956e-13	1.40085e-12	9.46299e-14	1.57032e-12	2.96053e-13
		11.43	1.74818e-12	1.54726e-13	1.40161e-12	1.03238e-13	1.5641e-12	2.98209e-13
		11.44	1.74282e-12	1.54053e-13	1.39966e-12	1.05765e-13	1.55641e-12	2.98726e-13
		11.45	1.73822e-12	1.54079e-13	1.40139e-12	1.07459e-13	1.59068e-12	2.9855e-13
		11.46	1.73134e-12	1.54568e-13	1.39342e-12	1.08997e-13	1.59981e-12	2.99017e-13
		11.47	1.73254e-12	1.53893e-13	1.38205e-12	1.01686e-13	1.59014e-12	2.96547e-13
		11.48	1.72765e-12	1.54667e-13	1.37215e-12	9.38316e-14	1.58796e-12	2.96554e-13
		11.49	1.72337e-12	1.52056e-13	1.37266e-12	1.04563e-13	1.56287e-12	2.96791e-13
		11.5	1.7288e-12	1.53752e-13	1.37244e-12	1.01037e-13	1.5514e-12	2.99045e-13
		11.51	1.71505e-12	1.51761e-13	1.36494e-12	1.02209e-13	1.50969e-12	3.00253e-13
		11.52	1.71557e-12	1.52811e-13	1.35218e-12	9.3658e-14	1.49592e-12	3.01546e-13
		11.53	1.7035e-12	1.53502e-13	1.37041e-12	1.10182e-13	1.48693e-12	3.01728e-13
		11.54	1.70243e-12	1.4991e-13	1.35178e-12	1.01547e-13	1.47962e-12	3.02037e-13
		11.55	1.70058e-12	1.49971e-13	1.35735e-12	1.09866e-13	1.47346e-12	3.02505e-13
		11.56	1.69582e-12	1.50657e-13	1.34438e-12	1.05675e-13	1.47101e-12	3.01632e-13
		11.57	1.68805e-12	1.48848e-13	1.33434e-12	9.68909e-14	1.46229e-12	3.035e-13
		11.58	1.68553e-12	1.50272e-13	1.33285e-12	1.09959e-13	1.45281e-12	3.0182e-13
		11.59	1.67763e-12	1.48613e-13	1.31448e-12	9.98348e-14	1.45015e-12	3.02303e-13
		11.6	1.66961e-12	1.46635e-13	1.31781e-12	1.00421e-13	1.44068e-12	3.03507e-13
		11.61	1.66633e-12	1.46835e-13	1.30678e-12	9.56779e-14	1.43606e-12	3.02023e-13
		11.62	1.66475e-12	1.49394e-13	1.31182e-12	1.04191e-13	1.42352e-12	3.0379e-13
		11.63	1.65525e-12	1.48987e-13	1.31103e-12	1.03567e-13	1.42148e-12	3.00658e-13
		11.64	1.65815e-12	1.48376e-13	1.32045e-12	9.9718e-14	1.41656e-12	3.0432e-13
		11.65	1.65691e-12	1.48142e-13	1.31586e-12	1.07616e-13	1.40945e-12	3.00578e-13
		11.66	1.6453e-12	1.46667e-13	1.30417e-12	9.90748e-14	1.39904e-12	3.01747e-13
		11.67	1.64369e-12	1.45893e-13	1.30088e-12	9.65385e-14	1.38761e-12	3.00925e-13
		11.68	1.63763e-12	1.45352e-13	1.30243e-12	1.00088e-13	1.38818e-12	3.02345e-13
		11.69	1.6402e-12	1.46007e-13	1.30058e-12	1.07285e-13	1.38199e-12	2.9928e-13
		11.7	1.6391e-12	1.46038e-13	1.28417e-12	9.47849e-14	1.37465e-12	2.9957e-13
		11.71	1.62837e-12	1.46121e-13	1.28884e-12	9.84779e-14	1.37046e-12	3.00448e-13
		11.72	1.62185e-12	1.4473e-13	1.27845e-12	9.16026e-14	1.36546e-12	2.98693e-13
		11.73	1.62609e-12	1.44277e-13	1.27511e-12	9.06367e-14	1.36474e-12	3.00281e-13
		11.74	1.62122e-12	1.44556e-13	1.27702e-12	9.49176e-14	1.35712e-12	2.98701e-13
		11.75	1.61501e-12	1.43281e-13	1.26512e-12	9.17141e-14	1.35572e-12	2.97355e-13
		11.76	1.60886e-12	1.44379e-13	1.263e-12	9.07157e-14	1.34434e-12	2.98428e-13
		11.77	1.59811e-12	1.45595e-13	1.2516e-12	8.79095e-14	1.33784e-12	2.99877e-13
		11.78	1.59257e-12	1.44207e-13	1.26541e-12	9.97647e-14	1.33709e-12	2.97095e-13
		11.79	1.58735e-12	1.43232e-13	1.24345e-12	9.17718e-14	1.32697e-12	2.98383e-13
		11.8	1.58871e-12	1.4277e-13	1.23719e-12	9.54824e-14	1.32052e-12	2.97249e-13
		11.81	1.58296e-12	1.43726e-13	1.2638e-12	9.48613e-14	1.32011e-12	2.9824e-13
		11.82	1.5777e-12	1.43185e-13	1.24169e-12	8.94201e-14	1.30591e-12	2.95134e-13
		11.83	1.57675e-12	1.43314e-13	1.24847e-12	9.23018e-14	1.30647e-12	2.97353e-13
		11.84	1.5672e-12	1.41388e-13	1.23477e-12	8.50087e-14	1.29735e-12	2.94955e-13
		11.85	1.56573e-12	1.41547e-13	1.24204e-12	9.05763e-14	1.29239e-12	2.97737e-13
		11.86	1.56762e-12	1.40783e-13	1.22346e-12	9.16695e-14	1.29507e-12	2.97779e-13
		11.87	1.56761e-12	1.41449e-13	1.2378e-12	9.08027e-14	1.28885e-12	2.95914e-13
		11.88	1.55427e-12	1.41795e-13	1.22503e-12	8.90832e-14	1.28385e-12	2.94639e-13
		11.89	1.54647e-12	1.40387e-13	1.23766e-12	9.15361e-14	1.28134e-12	2.9642e-13
		11.9	1.54972e-12	1.41593e-13	1.23007e-12	9.08893e-14	1.2776e-12	2.9601e-13
		11.91	1.54337e-12	1.41206e-13	1.22865e-12	9.08226e-14	1.26956e-12	2.97085e-13
		11.92	1.53806e-12	1.41345e-13	1.22752e-12	8.72841e-14	1.26699e-12	2.98495e-13
		11.93	1.53684e-12	1.40971e-13	1.2194e-12	9.03162e-14	1.25952e-12	2.96448e-13
		11.94	1.53739e-12	1.41748e-13	1.21662e-12	9.03264e-14	1.26019e-12	2.96119e-13
		11.95	1.53213e-12	1.41131e-13	1.21133e-12	9.16457e-14	1.25596e-12	2.97454e-13
		11.96	1.53007e-12	1.39603e-13	1.21261e-12	9.55339e-14	1.24642e-12	2.95082e-13
		11.97	1.52214e-12	1.39545e-13	1.20875e-12	8.76437e-14	1.24243e-12	2.94593e-13
		11.98	1.51839e-12	1.3951e-13	1.20917e-12	8.2286e-14	1.24372e-12	2.97247e-13
		11.99	1.51029e-12	1.39895e-13	1.20142e-12	8.83518e-14	1.23521e-12	2.97799e-13
		12	1.51439e-12	1.40778e-13	1.19896e-12	8.83874e-14	1.23569e-12	2.96041e-13
		12.01	1.49953e-12	1.38043e-13	1.19851e-12	8.40068e-14	1.22939e-12	2.96741e-13
		12.02	1.50189e-12	1.37616e-13	1.20437e-12	9.04564e-14	1.22744e-12	2.95377e-13
		12.03	1.50066e-12	1.37424e-13	1.18403e-12	8.38228e-14	1.22359e-12	2.94616e-13
		12.04	1.49877e-12	1.37663e-13	1.19084e-12	8.14164e-14	1.22076e-12	2.9482e-13
		12.05	1.48958e-12	1.37477e-13	1.1893e-12	8.61709e-14	1.21619e-12	2.95584e-13
		12.06	1.48929e-12	1.38872e-13	1.17993e-12	8.11848e-14	1.21403e-12	2.93396e-13
		12.07	1.47879e-12	1.40128e-13	1.18552e-12	9.02626e-14	1.21365e-12	2.9829e-13
		12.08	1.48255e-12	1.39729e-13	1.19078e-12	9.55212e-14	1.20437e-12	2.94566e-13
		12.09	1.48073e-12	1.38216e-13	1.1886e-12	9.87708e-14	1.20038e-12	2.94624e-13
		12.1	1.4808e-12	1.37847e-13	1.17815e-12	8.87566e-14	1.19988e-12	2.95304e-13
		12.11	1.46544e-12	1.36809e-13	1.18034e-12	8.77196e-14	1.19706e-12	2.93543e-13
		12.12	1.46714e-12	1.36937e-13	1.17139e-12	9.18521e-14	1.18909e-12	2.92869e-13
		12.13	1.46085e-12	1.3665e-13	1.17883e-12	9.33983e-14	1.19124e-12	2.92441e-13
		12.14	1.45047e-12	1.35524e-13	1.16846e-12	9.14382e-14	1.18583e-12	2.93406e-13
		12.15	1.45199e-12	1.36097e-13	1.16577e-12	8.85111e-14	1.1851e-12	2.95064e-13
		12.16	1.44874e-12	1.35575e-13	1.16471e-12	8.93017e-14	1.17999e-12	2.94952e-13
		12.17	1.44307e-12	1.3592e-13	1.15901e-12	8.43657e-14	1.17469e-12	2.92809e-13
		12.18	1.44449e-12	1.35671e-13	1.16873e-12	9.626e-14	1.17122e-12	2.93001e-13
		12.19	1.44439e-12	1.35614e-13	1.16015e-12	8.82624e-14	1.16483e-12	2.93652e-13
		12.2	1.43997e-12	1.34779e-13	1.1498e-12	8.63353e-14	1.16476e-12	2.91779e-13
		12.21	1.43582e-12	1.34873e-13	1.13939e-12	7.84762e-14	1.16162e-12	2.9399e-13
		12.22	1.43582e-12	1.35442e-13	1.15998e-12	8.70993e-14	1.16582e-12	2.91542e-13
		12.23	1.4269e-12	1.36322e-13	1.14473e-12	8.48654e-14	1.15804e-12	2.90243e-13
		12.24	1.42764e-12	1.3549e-13	1.14419e-12	9.29475e-14	1.15641e-12	2.91724e-13
		12.25	1.42126e-12	1.33183e-13	1.13101e-12	7.85511e-14	1.15155e-12	2.91347e-13
		12.26	1.41601e-12	1.33827e-13	1.13757e-12	8.79762e-14	1.14501e-12	2.90884e-13
		12.27	1.4141e-12	1.33717e-13	1.12983e-12	8.79008e-14	1.14597e-12	2.90305e-13
		12.28	1.41173e-12	1.33739e-13	1.13109e-12	8.16747e-14	1.1412e-12	2.87546e-13
		12.29	1.41361e-12	1.34472e-13	1.13482e-12	8.20164e-14	1.14143e-12	2.88681e-13
		12.3	1.40853e-12	1.33724e-13	1.1314e-12	8.74332e-14	1.14336e-12	2.87451e-13
		12.31	1.40246e-12	1.33314e-13	1.13314e-12	9.50924e-14	1.13358e-12	2.88033e-13
		12.32	1.39922e-12	1.32183e-13	1.12829e-12	8.78306e-14	1.13493e-12	2.90304e-13
		12.33	1.39426e-12	1.32009e-13	1.12686e-12	8.00745e-14	1.1316e-12	2.90196e-13
		12.34	1.39678e-12	1.32616e-13	1.12329e-12	8.65441e-14	1.12489e-12	2.87933e-13
		12.35	1.39365e-12	1.34372e-13	1.11731e-12	9.04972e-14	1.12565e-12	2.90591e-13
		12.36	1.38954e-12	1.34366e-13	1.12338e-12	8.49673e-14	1.12364e-12	2.89594e-13
		12.37	1.39135e-12	1.32073e-13	1.12149e-12	8.18178e-14	1.12127e-12	2.88067e-13
		12.38	1.38657e-12	1.32745e-13	1.11602e-12	8.27319e-14	1.11793e-12	2.88092e-13
		12.39	1.37901e-12	1.32172e-13	1.1155e-12	8.10981e-14	1.11454e-12	2.88371e-13
		12.4	1.37814e-12	1.31025e-13	1.11191e-12	8.75237e-14	1.11581e-12	2.88026e-13
		12.41	1.37872e-12	1.30848e-13	1.10318e-12	7.58217e-14	1.11015e-12	2.86116e-13
		12.42	1.37142e-12	1.30393e-13	1.11106e-12	8.63763e-14	1.1163e-12	2.87572e-13
		12.43	1.37299e-12	1.3031e-13	1.10093e-12	8.12797e-14	1.10713e-12	2.88165e-13
		12.44	1.36415e-12	1.30883e-13	1.09864e-12	8.14235e-14	1.10514e-12	2.85499e-13
		12.45	1.3669e-12	1.31465e-13	1.10215e-12	7.76675e-14	1.10307e-12	2.86337e-13
		12.46	1.36034e-12	1.30248e-13	1.1019e-12	8.65804e-14	1.09506e-12	2.87611e-13
		12.47	1.36185e-12	1.31576e-13	1.09691e-12	8.22692e-14	1.0993e-12	2.85519e-13
		12.48	1.36336e-12	1.28993e-13	1.09561e-12	8.37334e-14	1.09426e-12	2.8324e-13
		12.49	1.35095e-12	1.28563e-13	1.09435e-12	8.33582e-14	1.09107e-12	2.84482e-13
		12.5	1.35038e-12	1.2974e-13	1.0912e-12	8.05099e-14	1.08704e-12	2.85808e-13
		12.51	1.35063e-12	1.30532e-13	1.08821e-12	8.21929e-14	1.0836e-12	2.85792e-13
		12.52	1.34508e-12	1.27921e-13	1.08547e-12	8.13792e-14	1.08299e-12	2.85811e-13
		12.53	1.34266e-12	1.30001e-13	1.08149e-12	8.16307e-14	1.0799e-12	2.84567e-13
		12.54	1.34028e-12	1.29927e-13	1.09697e-12	8.62749e-14	1.07835e-12	2.83012e-13
		12.55	1.34036e-12	1.28376e-13	1.07404e-12	8.57417e-14	1.07812e-12	2.81736e-13
		12.56	1.33147e-12	1.29873e-13	1.08746e-12	9.38238e-14	1.07363e-12	2.84629e-13
		12.57	1.33548e-12	1.29186e-13	1.07231e-12	7.63643e-14	1.07619e-12	2.8169e-13
		12.58	1.33396e-12	1.29227e-13	1.06914e-12	7.953e-14	1.07299e-12	2.82776e-13
		12.59	1.32822e-12	1.28828e-13	1.07714e-12	8.02986e-14	1.06777e-12	2.83841e-13
		12.6	1.33063e-12	1.31164e-13	1.07442e-12	7.86521e-14	1.07025e-12	2.85101e-13
		12.61	1.32442e-12	1.27845e-13	1.06974e-12	8.24172e-14	1.06558e-12	2.81511e-13
		12.62	1.31484e-12	1.29699e-13	1.06047e-12	8.0679e-14	1.06138e-12	2.81757e-13
		12.63	1.31759e-12	1.30715e-13	1.0701e-12	8.80898e-14	1.06248e-12	2.83183e-13
		12.64	1.31376e-12	1.27804e-13	1.06482e-12	8.58927e-14	1.05917e-12	2.80878e-13
		12.65	1.31344e-12	1.28883e-13	1.06576e-12	8.40169e-14	1.05941e-12	2.8048e-13
		12.66	1.30997e-12	1.29306e-13	1.05984e-12	7.74303e-14	1.05801e-12	2.82818e-13
		12.67	1.30732e-12	1.27955e-13	1.05086e-12	7.75834e-14	1.05464e-12	2.79488e-13
		12.68	1.30228e-12	1.27975e-13	1.05738e-12	8.57468e-14	1.05316e-12	2.82052e-13
		12.69	1.30614e-12	1.29089e-13	1.05922e-12	8.38133e-14	1.05308e-12	2.81348e-13
		12.7	1.30045e-12	1.27281e-13	1.05272e-12	7.70825e-14	1.04761e-12	2.7884e-13
		12.71	1.29983e-12	1.29137e-13	1.04658e-12	8.21478e-14	1.04891e-12	2.79976e-13
		12.72	1.29981e-12	1.29059e-13	1.03695e-12	6.99623e-14	1.04756e-12	2.8211e-13
		12.73	1.29584e-12	1.28393e-13	1.04974e-12	8.62544e-14	1.04744e-12	2.81223e-13
		12.74	1.29061e-12	1.27255e-13	1.04702e-12	8.04641e-14	1.04387e-12	2.79242e-13
		12.75	1.29283e-12	1.25929e-13	1.04894e-12	7.92776e-14	1.04665e-12	2.8164e-13
		12.76	1.28284e-12	1.26258e-13	1.04668e-12	8.54523e-14	1.03753e-12	2.768e-13
		12.77	1.28419e-12	1.27987e-13	1.04132e-12	7.86714e-14	1.04286e-12	2.77403e-13
		12.78	1.28863e-12	1.27585e-13	1.04226e-12	7.395e-14	1.03967e-12	2.77356e-13
		12.79	1.282e-12	1.26554e-13	1.02585e-12	7.99774e-14	1.04079e-12	2.76171e-13
		12.8	1.27912e-12	1.27733e-13	1.03302e-12	7.91653e-14	1.03675e-12	2.7637e-13
		12.81	1.27438e-12	1.26862e-13	1.0292e-12	7.949e-14	1.03115e-12	2.76602e-13
		12.82	1.27813e-12	1.27555e-13	1.0283e-12	7.3064e-14	1.02782e-12	2.76528e-13
		12.83	1.2773e-12	1.27725e-13	1.03635e-12	8.17809e-14	1.03356e-12	2.77262e-13
		12.84	1.27019e-12	1.26341e-13	1.02872e-12	7.59792e-14	1.03667e-12	2.74793e-13
		12.85	1.26752e-12	1.25894e-13	1.0361e-12	8.0952e-14	1.02827e-12	2.78333e-13
		12.86	1.26748e-12	1.25787e-13	1.02106e-12	7.75584e-14	1.02807e-12	2.8016e-13
		12.87	1.26511e-12	1.27909e-13	1.03565e-12	8.06472e-14	1.02905e-12	2.75671e-13
		12.88	1.2632e-12	1.27722e-13	1.03301e-12	8.06465e-14	1.02173e-12	2.77432e-13
		12.89	1.26207e-12	1.27277e-13	1.03269e-12	8.18774e-14	1.02486e-12	2.73606e-13
		12.9	1.26624e-12	1.26701e-13	1.02557e-12	7.28243e-14	1.01542e-12	2.75206e-13
		12.91	1.26709e-12	1.27786e-13	1.01734e-12	7.46699e-14	1.01879e-12	2.75732e-13
		12.92	1.26019e-12	1.2723e-13	1.02174e-12	7.81407e-14	1.02105e-12	2.7721e-13
		12.93	1.25608e-12	1.26421e-13	1.02045e-12	8.47826e-14	1.0199e-12	2.75597e-13
		12.94	1.24865e-12	1.26983e-13	1.0139e-12	7.72672e-14	1.01541e-12	2.75519e-13
		12.95	1.25541e-12	1.28033e-13	1.01657e-12	8.4631e-14	1.01635e-12	2.75354e-13
		12.96	1.24705e-12	1.25814e-13	1.00639e-12	7.57797e-14	1.00978e-12	2.75505e-13
		12.97	1.25183e-12	1.25961e-13	1.01047e-12	7.69754e-14	1.0145e-12	2.74578e-13
		12.98	1.23994e-12	1.24093e-13	1.01714e-12	7.83214e-14	1.00686e-12	2.73212e-13
		12.99	1.25131e-12	1.26195e-13	1.02346e-12	7.27537e-14	1.00616e-12	2.73975e-13
		13	1.24263e-12	1.26165e-13	1.02498e-12	5.22335e-14	1.0058e-12	2.75037e-13
		13.01	1.24556e-12	1.26968e-13	1.03051e-12	5.3031e-14	1.00564e-12	2.7345e-13
		13.02	1.24189e-12	1.27598e-13	1.02496e-12	6.26422e-14	1.00228e-12	2.71606e-13
		13.03	1.23448e-12	1.28129e-13	1.03688e-12	6.09475e-14	1.00617e-12	2.67726e-13
		13.04	1.2389e-12	1.26689e-13	1.02204e-12	4.95398e-14	1.00675e-12	2.70121e-13
		13.05	1.23886e-12	1.28214e-13	1.01728e-12	5.12207e-14	1.00698e-12	2.73442e-13
		13.06	1.22348e-12	1.26795e-13	1.02801e-12	5.39326e-14	1.00202e-12	2.68783e-13
		13.07	1.22562e-12	1.26408e-13	1.02462e-12	5.81483e-14	1.00391e-12	2.70086e-13
		13.08	1.22697e-12	1.25849e-13	1.01643e-12	5.78568e-14	1.00324e-12	2.67171e-13
		13.09	1.22664e-12	1.26517e-13	1.00434e-12	6.355e-14	9.99359e-13	2.71139e-13
		13.1	1.22112e-12	1.26157e-13	1.03978e-12	5.79359e-14	9.97203e-13	2.70404e-13
		13.11	1.21964e-12	1.26067e-13	1.02011e-12	3.6635e-14	1.00301e-12	2.72043e-13
		13.12	1.21499e-12	1.27478e-13	1.02393e-12	5.55378e-14	9.98558e-13	2.72362e-13
		13.13	1.21686e-12	1.24199e-13	1.01505e-12	6.63505e-14	9.97674e-13	2.72282e-13
		13.14	1.22001e-12	1.27089e-13	9.97638e-13	7.14695e-14	9.92071e-13	2.69211e-13
		13.15	1.2157e-12	1.28935e-13	1.00397e-12	7.47162e-14	9.94271e-13	2.69724e-13
		13.16	1.20369e-12	1.27648e-13	9.83864e-13	6.7789e-14	9.9252e-13	2.695e-13
		13.17	1.21433e-12	1.26681e-13	9.8429e-13	6.43073e-14	9.9437e-13	2.71875e-13
		13.18	1.20651e-12	1.29193e-13	9.9104e-13	7.13559e-14	9.89995e-13	2.694e-13
		13.19	1.20841e-12	1.27274e-13	9.85371e-13	7.02306e-14	9.88734e-13	2.69986e-13
		13.2	1.20801e-12	1.26476e-13	9.80367e-13	7.22466e-14	9.83465e-13	2.70514e-13
		13.21	1.2036e-12	1.25834e-13	9.87166e-13	7.20399e-14	9.86772e-13	2.66161e-13
		13.22	1.20399e-12	1.26085e-13	9.76276e-13	7.72789e-14	9.83642e-13	2.67054e-13
		13.23	1.20358e-12	1.25608e-13	9.8023e-13	6.92232e-14	9.81391e-13	2.68551e-13
		13.24	1.19866e-12	1.27267e-13	9.70553e-13	6.30867e-14	9.79687e-13	2.68247e-13
		13.25	1.20091e-12	1.25527e-13	9.7796e-13	7.06282e-14	9.79787e-13	2.67735e-13
		13.26	1.19596e-12	1.25545e-13	9.70052e-13	6.80836e-14	9.80163e-13	2.64549e-13
		13.27	1.19108e-12	1.25193e-13	9.87687e-13	7.30546e-14	9.75632e-13	2.67043e-13
		13.28	1.19686e-12	1.24404e-13	9.70561e-13	7.05969e-14	9.78895e-13	2.66758e-13
		13.29	1.18701e-12	1.24668e-13	9.74614e-13	6.68637e-14	9.76495e-13	2.68012e-13
		13.3	1.18564e-12	1.2551e-13	9.63477e-13	6.30288e-14	9.70913e-13	2.67596e-13
		13.31	1.18939e-12	1.26331e-13	9.64521e-13	7.20668e-14	9.72979e-13	2.69894e-13
		13.32	1.18975e-12	1.23951e-13	9.61202e-13	6.89445e-14	9.70211e-13	2.66925e-13
		13.33	1.18209e-12	1.26273e-13	9.70229e-13	7.15659e-14	9.6708e-13	2.67874e-13
		13.34	1.17565e-12	1.25771e-13	9.6742e-13	6.87531e-14	9.67177e-13	2.68142e-13
		13.35	1.17598e-12	1.23206e-13	9.59217e-13	7.09894e-14	9.67362e-13	2.67142e-13
		13.36	1.18175e-12	1.24942e-13	9.66454e-13	6.51334e-14	9.64697e-13	2.70594e-13
		13.37	1.17817e-12	1.23925e-13	9.50973e-13	6.88518e-14	9.65222e-13	2.69074e-13
		13.38	1.17418e-12	1.24954e-13	9.6147e-13	7.12872e-14	9.6341e-13	2.6597e-13
		13.39	1.17516e-12	1.25274e-13	9.52286e-13	6.72721e-14	9.64324e-13	2.63662e-13
		13.4	1.17029e-12	1.26047e-13	9.51071e-13	4.50414e-14	9.60635e-13	2.66623e-13
		13.41	1.17419e-12	1.2366e-13	9.59763e-13	6.64032e-14	9.5699e-13	2.64108e-13
		13.42	1.17809e-12	1.2489e-13	9.55203e-13	6.6487e-14	9.53368e-13	2.66694e-13
		13.43	1.17204e-12	1.25386e-13	9.47453e-13	6.58015e-14	9.48429e-13	2.65249e-13
		13.44	1.16991e-12	1.24756e-13	9.48294e-13	6.76541e-14	9.51015e-13	2.64883e-13
		13.45	1.17001e-12	1.25183e-13	9.54965e-13	6.36559e-14	9.47944e-13	2.63617e-13
		13.46	1.16856e-12	1.24288e-13	9.52659e-13	6.42095e-14	9.49509e-13	2.65565e-13
		13.47	1.15842e-12	1.23594e-13	9.48642e-13	6.23191e-14	9.46262e-13	2.66018e-13
		13.48	1.16245e-12	1.23624e-13	9.38362e-13	6.39732e-14	9.50096e-13	2.62469e-13
		13.49	1.15836e-12	1.24569e-13	9.38031e-13	5.97458e-14	9.54072e-13	2.63211e-13
		13.5	1.15645e-12	1.24987e-13	9.47476e-13	5.25745e-14	9.48183e-13	2.61206e-13
		13.51	1.15562e-12	1.24047e-13	9.32087e-13	7.14177e-14	9.46301e-13	2.61154e-13
		13.52	1.15843e-12	1.24018e-13	9.46237e-13	6.23682e-14	9.46759e-13	2.62766e-13
		13.53	1.16362e-12	1.25242e-13	9.32197e-13	6.828e-14	9.50641e-13	2.61773e-13
		13.54	1.1586e-12	1.2597e-13	9.44067e-13	7.50412e-14	9.4579e-13	2.61437e-13
		13.55	1.16101e-12	1.24533e-13	9.30097e-13	7.11919e-14	9.45856e-13	2.61395e-13
		13.56	1.16197e-12	1.23802e-13	9.3263e-13	6.17346e-14	9.36702e-13	2.65019e-13
		13.57	1.15434e-12	1.24e-13	9.31293e-13	6.34129e-14	9.35339e-13	2.63185e-13
		13.58	1.15682e-12	1.22671e-13	9.21531e-13	6.59368e-14	9.35419e-13	2.62726e-13
		13.59	1.14499e-12	1.22312e-13	9.23103e-13	5.52351e-14	9.35081e-13	2.61878e-13
		13.6	1.13759e-12	1.2071e-13	9.28329e-13	5.57582e-14	9.36477e-13	2.63735e-13
		13.61	1.14896e-12	1.21374e-13	9.32872e-13	5.78496e-14	9.37029e-13	2.63622e-13
		13.62	1.14017e-12	1.19196e-13	9.35475e-13	6.60421e-14	9.31724e-13	2.60985e-13
		13.63	1.14253e-12	1.19004e-13	9.21687e-13	5.83739e-14	9.33089e-13	2.61e-13
		13.64	1.13921e-12	1.2029e-13	9.2207e-13	5.52993e-14	9.33493e-13	2.58628e-13
		13.65	1.13936e-12	1.20461e-13	9.13015e-13	6.62641e-14	9.32823e-13	2.62422e-13
		13.66	1.13496e-12	1.19976e-13	9.17108e-13	6.9106e-14	9.28659e-13	2.62849e-13
		13.67	1.13927e-12	1.19962e-13	9.11028e-13	5.8178e-14	9.27025e-13	2.63399e-13
		13.68	1.13826e-12	1.17933e-13	9.09263e-13	6.1125e-14	9.25942e-13	2.6138e-13
		13.69	1.13555e-12	1.17592e-13	9.03713e-13	6.27113e-14	9.25834e-13	2.62406e-13
		13.7	1.13882e-12	1.17882e-13	9.14683e-13	6.67775e-14	9.26568e-13	2.58515e-13
		13.71	1.13054e-12	1.19639e-13	9.03629e-13	6.37234e-14	9.1951e-13	2.61256e-13
		13.72	1.12451e-12	1.20991e-13	8.99778e-13	6.19785e-14	9.23778e-13	2.63274e-13
		13.73	1.12403e-12	1.17327e-13	9.10879e-13	6.21987e-14	9.23571e-13	2.62203e-13
		13.74	1.12456e-12	1.17338e-13	9.01946e-13	6.10618e-14	9.22459e-13	2.58238e-13
		13.75	1.11964e-12	1.17024e-13	9.07334e-13	6.88442e-14	9.20278e-13	2.60434e-13
		13.76	1.12044e-12	1.15342e-13	8.99784e-13	6.21003e-14	9.21803e-13	2.59645e-13
		13.77	1.11873e-12	1.17074e-13	9.0482e-13	7.30259e-14	9.22557e-13	2.62111e-13
		13.78	1.12596e-12	1.17957e-13	9.00662e-13	6.01714e-14	9.22921e-13	2.59666e-13
		13.79	1.11788e-12	1.1915e-13	8.95216e-13	5.2604e-14	9.18725e-13	2.59589e-13
		13.8	1.11282e-12	1.1895e-13	9.02712e-13	5.59084e-14	9.2075e-13	2.604e-13
		13.81	1.11507e-12	1.18995e-13	9.00857e-13	6.01473e-14	9.11165e-13	2.59742e-13
		13.82	1.11383e-12	1.20135e-13	8.91436e-13	5.97138e-14	9.10362e-13	2.59244e-13
		13.83	1.11114e-12	1.18633e-13	8.94838e-13	6.02934e-14	9.12295e-13	2.59065e-13
		13.84	1.11497e-12	1.19914e-13	8.95369e-13	6.17752e-14	9.09447e-13	2.57613e-13
		13.85	1.1118e-12	1.19392e-13	8.92677e-13	5.37339e-14	9.12335e-13	2.58209e-13
		13.86	1.11091e-12	1.17102e-13	8.90143e-13	6.05384e-14	9.10528e-13	2.58467e-13
		13.87	1.10467e-12	1.15002e-13	8.91718e-13	6.6585e-14	9.11073e-13	2.56972e-13
		13.88	1.10194e-12	1.15324e-13	8.82708e-13	6.25357e-14	9.10002e-13	2.58134e-13
		13.89	1.10036e-12	1.14427e-13	8.87304e-13	7.08827e-14	9.08199e-13	2.57133e-13
		13.9	1.09516e-12	1.14367e-13	8.78185e-13	5.91398e-14	9.09217e-13	2.59876e-13
		13.91	1.10115e-12	1.13652e-13	8.88773e-13	6.61175e-14	9.03732e-13	2.56635e-13
		13.92	1.10538e-12	1.14977e-13	8.71201e-13	5.98183e-14	9.05887e-13	2.57687e-13
		13.93	1.09526e-12	1.13438e-13	8.89183e-13	5.0005e-14	9.05207e-13	2.56035e-13
		13.94	1.09313e-12	1.12716e-13	8.75282e-13	6.10082e-14	9.02635e-13	2.56092e-13
		13.95	1.09393e-12	1.1434e-13	8.77977e-13	6.52789e-14	8.96456e-13	2.55989e-13
		13.96	1.09299e-12	1.14343e-13	8.76896e-13	5.78902e-14	9.04569e-13	2.51699e-13
		13.97	1.09005e-12	1.15406e-13	8.76768e-13	5.99548e-14	9.0365e-13	2.50475e-13
		13.98	1.09142e-12	1.14134e-13	8.79695e-13	6.31981e-14	9.05887e-13	2.51425e-13
		13.99	1.08663e-12	1.13661e-13	8.71389e-13	6.02515e-14	9.02142e-13	2.52707e-13
		14	1.0895e-12	1.1344e-13	8.74802e-13	6.73133e-14	9.05907e-13	2.51892e-13
		14.01	1.08154e-12	1.12765e-13	8.67575e-13	6.17658e-14	9.06659e-13	2.52098e-13
		14.02	1.08721e-12	1.13148e-13	8.59758e-13	6.66668e-14	8.99576e-13	2.51655e-13
		14.03	1.07707e-12	1.13743e-13	8.70329e-13	6.29195e-14	8.96825e-13	2.51921e-13
		14.04	1.08168e-12	1.13509e-13	8.56033e-13	5.91219e-14	8.97017e-13	2.5183e-13
		14.05	1.07852e-12	1.1173e-13	8.67915e-13	6.55908e-14	8.99015e-13	2.49898e-13
		14.06	1.07757e-12	1.12148e-13	8.58198e-13	6.15229e-14	8.93699e-13	2.50363e-13
		14.07	1.08163e-12	1.11112e-13	8.67206e-13	6.87143e-14	8.88225e-13	2.51904e-13
		14.08	1.07735e-12	1.11365e-13	8.58409e-13	5.85926e-14	8.90481e-13	2.51398e-13
		14.09	1.07695e-12	1.13716e-13	8.69894e-13	6.31223e-14	8.93821e-13	2.52542e-13
		14.1	1.06933e-12	1.11612e-13	8.55815e-13	5.99438e-14	8.87466e-13	2.52103e-13
		14.11	1.06831e-12	1.10159e-13	8.67309e-13	6.10484e-14	8.88266e-13	2.51676e-13
		14.12	1.07482e-12	1.11595e-13	8.64357e-13	6.5371e-14	8.91494e-13	2.51414e-13
		14.13	1.065e-12	1.10463e-13	8.61111e-13	5.05604e-14	8.92878e-13	2.53333e-13
		14.14	1.071e-12	1.12629e-13	8.69223e-13	4.56578e-14	8.88285e-13	2.50498e-13
		14.15	1.06572e-12	1.12461e-13	8.75105e-13	4.82771e-14	8.90401e-13	2.51723e-13
		14.16	1.06756e-12	1.0962e-13	8.58884e-13	5.06798e-14	8.80872e-13	2.4985e-13
		14.17	1.06686e-12	1.10861e-13	8.62329e-13	5.94328e-14	8.85673e-13	2.4915e-13
		14.18	1.06506e-12	1.10452e-13	8.4166e-13	5.62542e-14	8.89369e-13	2.52083e-13
		14.19	1.05764e-12	1.08918e-13	8.57111e-13	6.792e-14	8.89427e-13	2.4926e-13
		14.2	1.0591e-12	1.11888e-13	8.53218e-13	7.22483e-14	8.80908e-13	2.50272e-13
		14.21	1.06091e-12	1.11087e-13	8.38994e-13	7.43308e-14	8.84769e-13	2.5125e-13
		14.22	1.0526e-12	1.10688e-13	8.36799e-13	7.38246e-14	8.82896e-13	2.53536e-13
		14.23	1.0529e-12	1.1086e-13	8.41848e-13	7.0113e-14	8.77918e-13	2.49547e-13
		14.24	1.05285e-12	1.09779e-13	8.39151e-13	7.13359e-14	8.80089e-13	2.524e-13
		14.25	1.04898e-12	1.10211e-13	8.32336e-13	7.24364e-14	8.80551e-13	2.48141e-13
		14.26	1.0517e-12	1.07623e-13	8.29778e-13	7.04636e-14	8.74142e-13	2.49421e-13
		14.27	1.04766e-12	1.08054e-13	8.45806e-13	7.03718e-14	8.79106e-13	2.46556e-13
		14.28	1.04384e-12	1.083e-13	8.30897e-13	7.02937e-14	8.76172e-13	2.49226e-13
		14.29	1.0429e-12	1.09052e-13	8.23132e-13	6.97111e-14	8.77811e-13	2.48156e-13
		14.3	1.04013e-12	1.07221e-13	8.35389e-13	6.8107e-14	8.81628e-13	2.50267e-13
		14.31	1.04108e-12	1.09535e-13	8.23834e-13	7.14079e-14	8.78711e-13	2.46629e-13
		14.32	1.03928e-12	1.07284e-13	8.26936e-13	7.78767e-14	8.74541e-13	2.47477e-13
		14.33	1.04031e-12	1.06967e-13	8.19677e-13	7.17188e-14	8.7526e-13	2.5138e-13
		14.34	1.03986e-12	1.08676e-13	8.26214e-13	6.70588e-14	8.75877e-13	2.46576e-13
		14.35	1.0375e-12	1.0731e-13	8.23519e-13	6.95643e-14	8.71111e-13	2.47505e-13
		14.36	1.04194e-12	1.07234e-13	8.20024e-13	7.06915e-14	8.71997e-13	2.49619e-13
		14.37	1.03241e-12	1.04834e-13	8.14215e-13	6.45319e-14	8.70267e-13	2.46329e-13
		14.38	1.0335e-12	1.05226e-13	8.11722e-13	6.28788e-14	8.5929e-13	2.46688e-13
		14.39	1.03383e-12	1.07888e-13	8.12197e-13	7.14706e-14	8.65891e-13	2.47247e-13
		14.4	1.03022e-12	1.04858e-13	8.17439e-13	7.441e-14	8.66474e-13	2.47213e-13
		14.41	1.02982e-12	1.06962e-13	8.15026e-13	6.07141e-14	8.65541e-13	2.47083e-13
		14.42	1.02452e-12	1.07694e-13	8.05872e-13	7.3028e-14	8.61126e-13	2.46815e-13
		14.43	1.02657e-12	1.06814e-13	8.09001e-13	6.97087e-14	8.61296e-13	2.462e-13
		14.44	1.02523e-12	1.07029e-13	7.99293e-13	6.9986e-14	8.62509e-13	2.48072e-13
		14.45	1.02576e-12	1.06289e-13	8.18509e-13	7.13563e-14	8.59766e-13	2.44899e-13
		14.46	1.01947e-12	1.05052e-13	8.07168e-13	7.02399e-14	8.59535e-13	2.47414e-13
		14.47	1.01592e-12	1.04456e-13	7.92916e-13	6.7822e-14	8.55349e-13	2.43399e-13
		14.48	1.01681e-12	1.05932e-13	7.93153e-13	6.38651e-14	8.57063e-13	2.43082e-13
		14.49	1.01734e-12	1.04136e-13	8.04375e-13	6.97944e-14	8.54677e-13	2.44357e-13
		14.5	1.02105e-12	1.04558e-13	7.91322e-13	7.08192e-14	8.56384e-13	2.45839e-13
		14.51	1.01841e-12	1.0453e-13	7.8802e-13	7.01635e-14	8.56647e-13	2.44355e-13
		14.52	1.01462e-12	1.03694e-13	7.88076e-13	6.85789e-14	8.51458e-13	2.43355e-13
		14.53	1.01809e-12	1.06323e-13	7.97402e-13	7.51771e-14	8.55282e-13	2.4478e-13
		14.54	1.0107e-12	1.04142e-13	7.89907e-13	7.38906e-14	8.50123e-13	2.44409e-13
		14.55	1.01851e-12	1.04572e-13	7.8637e-13	7.059e-14	8.53734e-13	2.43927e-13
		14.56	1.00864e-12	1.05867e-13	7.85841e-13	6.71947e-14	8.55726e-13	2.42771e-13
		14.57	1.00988e-12	1.03253e-13	7.92099e-13	7.04738e-14	8.51143e-13	2.45446e-13
		14.58	1.00731e-12	1.03768e-13	7.77695e-13	6.45678e-14	8.4997e-13	2.45468e-13
		14.59	1.00696e-12	1.03386e-13	7.86637e-13	6.58829e-14	8.48788e-13	2.43451e-13
		14.6	1.00752e-12	1.03789e-13	7.73637e-13	6.3805e-14	8.45969e-13	2.38814e-13
		14.61	1.00779e-12	1.04662e-13	7.77124e-13	6.18442e-14	8.48934e-13	2.43442e-13
		14.62	1.00503e-12	1.06248e-13	7.82203e-13	6.64301e-14	8.44313e-13	2.4021e-13
		14.63	9.98682e-13	1.04454e-13	7.82301e-13	5.9688e-14	8.44333e-13	2.40162e-13
		14.64	1.00045e-12	1.05312e-13	7.85744e-13	6.45827e-14	8.42703e-13	2.40278e-13
		14.65	1.00368e-12	1.05828e-13	7.77337e-13	6.34883e-14	8.37246e-13	2.3884e-13
		14.66	9.97513e-13	1.04915e-13	7.88904e-13	6.73728e-14	8.38266e-13	2.39481e-13
		14.67	9.958e-13	1.05489e-13	7.78746e-13	6.29392e-14	8.40041e-13	2.40791e-13
		14.68	9.98486e-13	1.04879e-13	7.8308e-13	6.37911e-14	8.36143e-13	2.3812e-13
		14.69	9.99619e-13	1.04724e-13	7.87878e-13	6.58555e-14	8.34384e-13	2.37405e-13
		14.7	9.9413e-13	1.04539e-13	7.76872e-13	6.1133e-14	8.31314e-13	2.35484e-13
		14.71	9.94717e-13	1.07027e-13	7.6494e-13	6.13721e-14	8.36207e-13	2.38419e-13
		14.72	9.96912e-13	1.05946e-13	7.65129e-13	5.98991e-14	8.37874e-13	2.37279e-13
		14.73	9.93673e-13	1.04064e-13	7.67764e-13	6.53692e-14	8.33598e-13	2.38647e-13
		14.74	9.92753e-13	1.02808e-13	7.67583e-13	6.56079e-14	8.33606e-13	2.36507e-13
		14.75	9.89789e-13	1.05218e-13	7.64727e-13	6.75146e-14	8.29428e-13	2.36196e-13
		14.76	9.96232e-13	1.04687e-13	7.69983e-13	6.32461e-14	8.36122e-13	2.38e-13
		14.77	1.00087e-12	1.03911e-13	7.62255e-13	6.14987e-14	8.3404e-13	2.37515e-13
		14.78	9.96324e-13	1.0436e-13	7.68008e-13	6.24103e-14	8.3126e-13	2.38133e-13
		14.79	9.92045e-13	1.0401e-13	7.70291e-13	6.88919e-14	8.26708e-13	2.34792e-13
		14.8	9.94353e-13	1.04242e-13	7.67565e-13	7.0864e-14	8.3353e-13	2.36046e-13
		14.81	9.86344e-13	1.03848e-13	7.58887e-13	6.07054e-14	8.2615e-13	2.34342e-13
		14.82	9.85952e-13	1.0412e-13	7.62617e-13	6.29186e-14	8.28978e-13	2.36582e-13
		14.83	9.8811e-13	1.04857e-13	7.58617e-13	6.71135e-14	8.32243e-13	2.36435e-13
		14.84	9.83497e-13	1.03375e-13	7.67419e-13	6.61293e-14	8.24983e-13	2.35952e-13
		14.85	9.81419e-13	1.03981e-13	7.71517e-13	6.59489e-14	8.24487e-13	2.34829e-13
		14.86	9.84425e-13	1.04681e-13	7.58175e-13	5.63178e-14	8.32885e-13	2.37923e-13
		14.87	9.80501e-13	1.04581e-13	7.59591e-13	5.92904e-14	8.2614e-13	2.35828e-13
		14.88	9.82391e-13	1.04218e-13	7.47609e-13	6.04198e-14	8.25547e-13	2.34274e-13
		14.89	9.79833e-13	1.04801e-13	7.52711e-13	5.96038e-14	8.32672e-13	2.32953e-13
		14.9	9.74341e-13	1.03286e-13	7.55194e-13	5.59269e-14	8.31484e-13	2.34353e-13
		14.91	9.75906e-13	1.02392e-13	7.69141e-13	6.30127e-14	8.27445e-13	2.35327e-13
		14.92	9.73504e-13	1.04563e-13	7.62061e-13	6.14789e-14	8.28996e-13	2.35608e-13
		14.93	9.68221e-13	1.01701e-13	7.50402e-13	5.75556e-14	8.26993e-13	2.3246e-13
		14.94	9.70941e-13	1.03661e-13	7.60038e-13	6.08621e-14	8.30975e-13	2.3419e-13
		14.95	9.69437e-13	1.03e-13	7.49867e-13	5.49893e-14	8.25329e-13	2.31775e-13
		14.96	9.67281e-13	1.02917e-13	7.47438e-13	6.3244e-14	8.23893e-13	2.33816e-13
		14.97	9.67213e-13	1.04349e-13	7.49201e-13	6.03543e-14	8.27256e-13	2.35104e-13
		14.98	9.68659e-13	1.02685e-13	7.46626e-13	5.37198e-14	8.22877e-13	2.31482e-13
		14.99	9.65131e-13	1.03247e-13	7.39892e-13	6.1462e-14	8.26543e-13	2.31707e-13
		15	9.63146e-13	1.03338e-13	7.46795e-13	6.76395e-14	8.18431e-13	2.31054e-13
		15.01	9.61749e-13	1.02847e-13	7.45274e-13	6.72929e-14	8.19592e-13	2.31165e-13
		15.02	9.59821e-13	1.03306e-13	7.55805e-13	6.50286e-14	8.20916e-13	2.32817e-13
		15.03	9.58188e-13	1.02399e-13	7.4659e-13	6.42954e-14	8.2622e-13	2.33962e-13
		15.04	9.57324e-13	1.03456e-13	7.52398e-13	6.89574e-14	8.18264e-13	2.32784e-13
		15.05	9.55914e-13	1.00955e-13	7.49904e-13	6.64261e-14	8.19745e-13	2.33805e-13
		15.06	9.62983e-13	1.02409e-13	7.4558e-13	6.14716e-14	8.18543e-13	2.34897e-13
		15.07	9.5686e-13	1.01466e-13	7.34478e-13	5.73806e-14	8.17096e-13	2.32976e-13
		15.08	9.56123e-13	1.00677e-13	7.38106e-13	6.60763e-14	8.18557e-13	2.32225e-13
		15.09	9.53364e-13	1.00249e-13	7.42217e-13	6.39096e-14	8.14088e-13	2.3134e-13
		15.1	9.56442e-13	1.02662e-13	7.38783e-13	5.86567e-14	8.09345e-13	2.34335e-13
		15.11	9.52648e-13	1.00755e-13	7.42679e-13	6.82102e-14	8.13372e-13	2.333e-13
		15.12	9.51323e-13	1.02419e-13	7.29081e-13	6.35887e-14	8.19444e-13	2.33656e-13
		15.13	9.47124e-13	1.02008e-13	7.50333e-13	6.05896e-14	8.12791e-13	2.33239e-13
		15.14	9.50038e-13	1.00501e-13	7.34088e-13	5.47964e-14	8.09961e-13	2.31251e-13
		15.15	9.49204e-13	1.01491e-13	7.39329e-13	6.25406e-14	8.11286e-13	2.31267e-13
		15.16	9.50741e-13	9.9238e-14	7.30321e-13	5.95024e-14	8.12508e-13	2.31192e-13
		15.17	9.44953e-13	1.00583e-13	7.3224e-13	5.95138e-14	8.165e-13	2.33319e-13
		15.18	9.39726e-13	9.9194e-14	7.24535e-13	6.40501e-14	8.1422e-13	2.30689e-13
		15.19	9.399e-13	9.80779e-14	7.29694e-13	6.37778e-14	8.12474e-13	2.29313e-13
		15.2	9.40185e-13	9.78076e-14	7.27065e-13	6.13205e-14	8.12029e-13	2.31005e-13
		15.21	9.39826e-13	9.7829e-14	7.31056e-13	6.18415e-14	8.08844e-13	2.30614e-13
		15.22	9.44604e-13	9.69499e-14	7.33196e-13	6.40344e-14	8.12577e-13	2.2882e-13
		15.23	9.44176e-13	9.50138e-14	7.39901e-13	6.66746e-14	8.12237e-13	2.30305e-13
		15.24	9.39159e-13	9.60621e-14	7.3479e-13	6.13799e-14	8.07271e-13	2.28442e-13
		15.25	9.3744e-13	9.40072e-14	7.39733e-13	7.11007e-14	8.07824e-13	2.28777e-13
		15.26	9.34108e-13	9.5157e-14	7.25637e-13	5.80435e-14	8.04878e-13	2.28669e-13
		15.27	9.31578e-13	9.64151e-14	7.38311e-13	6.75978e-14	8.05433e-13	2.31311e-13
		15.28	9.24672e-13	9.77737e-14	7.29238e-13	6.52144e-14	8.05512e-13	2.3118e-13
		15.29	9.31485e-13	9.71446e-14	7.21661e-13	7.00692e-14	7.9971e-13	2.28753e-13
		15.3	9.29184e-13	9.61418e-14	7.26147e-13	6.92147e-14	7.98412e-13	2.28064e-13
		15.31	9.27873e-13	9.62858e-14	7.24667e-13	6.21452e-14	8.02202e-13	2.26659e-13
		15.32	9.26331e-13	9.6348e-14	7.18105e-13	6.30966e-14	8.01544e-13	2.29273e-13
		15.33	9.19901e-13	9.70729e-14	7.21707e-13	6.55962e-14	7.97034e-13	2.27673e-13
		15.34	9.24765e-13	9.43797e-14	7.13276e-13	6.46259e-14	7.97522e-13	2.25836e-13
		15.35	9.269e-13	9.4696e-14	7.25408e-13	6.40543e-14	7.92029e-13	2.25765e-13
		15.36	9.20605e-13	9.30722e-14	7.13316e-13	6.11522e-14	7.96753e-13	2.26139e-13
		15.37	9.20213e-13	9.4896e-14	7.1792e-13	6.34989e-14	7.95308e-13	2.25991e-13
		15.38	9.2094e-13	9.61493e-14	7.22361e-13	7.02903e-14	7.91024e-13	2.26019e-13
		15.39	9.21085e-13	9.55641e-14	7.14928e-13	6.52265e-14	7.88302e-13	2.25702e-13
		15.4	9.20569e-13	9.38879e-14	7.23779e-13	6.86521e-14	7.93187e-13	2.26835e-13
		15.41	9.17061e-13	9.57648e-14	7.16222e-13	6.84395e-14	7.91922e-13	2.27599e-13
		15.42	9.18639e-13	9.55942e-14	7.25496e-13	6.51405e-14	7.92729e-13	2.25371e-13
		15.43	9.15758e-13	9.54838e-14	7.1229e-13	7.03156e-14	7.87727e-13	2.22978e-13
		15.44	9.13015e-13	9.58471e-14	7.12322e-13	6.21522e-14	7.91506e-13	2.22771e-13
		15.45	9.11403e-13	9.72659e-14	7.13466e-13	7.01299e-14	7.87772e-13	2.23324e-13
		15.46	9.09452e-13	9.65632e-14	7.24115e-13	6.6649e-14	7.90307e-13	2.25338e-13
		15.47	9.05378e-13	9.48511e-14	7.1029e-13	5.89744e-14	7.8785e-13	2.26001e-13
		15.48	9.06767e-13	9.46952e-14	7.21891e-13	6.37572e-14	7.8864e-13	2.25258e-13
		15.49	9.03526e-13	9.56014e-14	7.14955e-13	7.30724e-14	7.84423e-13	2.23749e-13
		15.5	9.07996e-13	9.49761e-14	7.13879e-13	6.69649e-14	7.84549e-13	2.26548e-13
		15.51	9.1126e-13	9.49954e-14	7.09056e-13	5.75143e-14	7.86347e-13	2.23542e-13
		15.52	9.08405e-13	9.54687e-14	7.07073e-13	6.36259e-14	7.81552e-13	2.23811e-13
		15.53	9.01974e-13	9.46749e-14	7.0293e-13	5.91527e-14	7.83335e-13	2.22471e-13
		15.54	9.04438e-13	9.27101e-14	7.07488e-13	6.61792e-14	7.82487e-13	2.23796e-13
		15.55	9.07396e-13	9.26326e-14	6.95099e-13	5.97575e-14	7.81149e-13	2.24661e-13
		15.56	9.07546e-13	9.19745e-14	7.04641e-13	6.43353e-14	7.85515e-13	2.21155e-13
		15.57	9.03491e-13	9.38134e-14	7.05266e-13	6.64311e-14	7.86848e-13	2.23454e-13
		15.58	9.04033e-13	9.25074e-14	6.94413e-13	6.83895e-14	7.85366e-13	2.22819e-13
		15.59	9.00522e-13	9.32095e-14	7.00395e-13	6.34798e-14	7.81516e-13	2.23475e-13
		15.6	8.98575e-13	9.43648e-14	7.05072e-13	6.26216e-14	7.81856e-13	2.20012e-13
		15.61	8.99121e-13	9.33572e-14	6.96942e-13	6.46848e-14	7.83408e-13	2.23804e-13
		15.62	8.99635e-13	9.58683e-14	6.9198e-13	6.32459e-14	7.74754e-13	2.19426e-13
		15.63	8.95301e-13	9.55873e-14	6.95517e-13	7.03972e-14	7.77558e-13	2.19156e-13
		15.64	8.94152e-13	9.26708e-14	6.95839e-13	7.1331e-14	7.75222e-13	2.17973e-13
		15.65	8.94177e-13	9.35702e-14	6.93777e-13	6.15046e-14	7.73483e-13	2.18991e-13
		15.66	8.9057e-13	9.29948e-14	6.91194e-13	5.92159e-14	7.77339e-13	2.19083e-13
		15.67	8.91392e-13	9.32306e-14	6.91484e-13	6.24535e-14	7.72274e-13	2.19333e-13
		15.68	8.95983e-13	9.25927e-14	6.92662e-13	6.67613e-14	7.74923e-13	2.17822e-13
		15.69	8.93926e-13	9.30434e-14	6.99441e-13	6.67393e-14	7.71498e-13	2.1793e-13
		15.7	8.89966e-13	9.25249e-14	6.98436e-13	6.41548e-14	7.71321e-13	2.19349e-13
		15.71	8.89947e-13	9.33805e-14	6.86869e-13	6.20422e-14	7.66919e-13	2.17569e-13
		15.72	8.88767e-13	9.38448e-14	6.91317e-13	6.75845e-14	7.68256e-13	2.18086e-13
		15.73	8.89181e-13	9.25686e-14	6.90841e-13	6.05455e-14	7.6349e-13	2.16291e-13
		15.74	8.86002e-13	9.37724e-14	6.93031e-13	6.28672e-14	7.67294e-13	2.20359e-13
		15.75	8.91419e-13	9.41087e-14	6.9353e-13	6.19728e-14	7.64948e-13	2.19277e-13
		15.76	8.84866e-13	9.41024e-14	6.93836e-13	6.11677e-14	7.67339e-13	2.1986e-13
		15.77	8.83811e-13	9.30033e-14	6.88491e-13	6.34578e-14	7.63988e-13	2.18474e-13
		15.78	8.81022e-13	9.34572e-14	6.77842e-13	6.03272e-14	7.62187e-13	2.16407e-13
		15.79	8.90492e-13	9.28853e-14	6.78841e-13	6.14621e-14	7.66563e-13	2.18701e-13
		15.8	8.90725e-13	9.3608e-14	6.78716e-13	6.02337e-14	7.66766e-13	2.15351e-13
		15.81	8.84617e-13	9.39471e-14	6.79071e-13	6.94119e-14	7.64319e-13	2.14309e-13
		15.82	8.77408e-13	9.40361e-14	6.92342e-13	6.56823e-14	7.65338e-13	2.16175e-13
		15.83	8.7842e-13	9.42386e-14	6.82284e-13	5.99427e-14	7.70258e-13	2.15582e-13
		15.84	8.78442e-13	9.26999e-14	6.84539e-13	6.05913e-14	7.64078e-13	2.13721e-13
		15.85	8.749e-13	9.35138e-14	6.87571e-13	6.97906e-14	7.6078e-13	2.15269e-13
		15.86	8.71721e-13	9.32217e-14	6.81097e-13	5.72818e-14	7.56877e-13	2.17263e-13
		15.87	8.77032e-13	9.32361e-14	6.71905e-13	6.6523e-14	7.62434e-13	2.16213e-13
		15.88	8.75638e-13	9.30697e-14	6.69289e-13	5.97628e-14	7.68101e-13	2.12945e-13
		15.89	8.77588e-13	9.17154e-14	6.73841e-13	6.75927e-14	7.6223e-13	2.12981e-13
		15.9	8.70577e-13	9.50718e-14	6.67571e-13	6.77426e-14	7.62681e-13	2.12163e-13
		15.91	8.69345e-13	9.51148e-14	6.7795e-13	7.06988e-14	7.61406e-13	2.10341e-13
		15.92	8.58654e-13	9.34467e-14	6.68706e-13	6.22568e-14	7.59385e-13	2.15753e-13
		15.93	8.69223e-13	9.45832e-14	6.80495e-13	5.92381e-14	7.59876e-13	2.1278e-13
		15.94	8.66325e-13	9.27755e-14	6.70128e-13	6.05357e-14	7.52203e-13	2.14505e-13
		15.95	8.6724e-13	9.20424e-14	6.76362e-13	6.85167e-14	7.52617e-13	2.13609e-13
		15.96	8.64165e-13	9.41281e-14	6.73637e-13	6.98743e-14	7.53643e-13	2.14666e-13
		15.97	8.58203e-13	9.26366e-14	6.56939e-13	5.57511e-14	7.5738e-13	2.13637e-13
		15.98	8.53902e-13	9.32014e-14	6.72605e-13	7.62644e-14	7.55061e-13	2.14652e-13
		15.99	8.51736e-13	9.44292e-14	6.75661e-13	7.19273e-14	7.52493e-13	2.15433e-13
		16	8.61433e-13	9.33724e-14	6.70325e-13	6.26782e-14	7.52957e-13	2.11493e-13
		16.01	8.55454e-13	9.37595e-14	6.56856e-13	6.45525e-14	7.52245e-13	2.12085e-13
		16.02	8.50624e-13	9.37479e-14	6.5809e-13	6.38409e-14	7.52183e-13	2.11703e-13
		16.03	8.58012e-13	9.50853e-14	6.55706e-13	7.10966e-14	7.51972e-13	2.09424e-13
		16.04	8.55813e-13	9.47244e-14	6.53208e-13	6.16687e-14	7.52037e-13	2.0909e-13
		16.05	8.50387e-13	9.49871e-14	6.6892e-13	6.4474e-14	7.48284e-13	2.12388e-13
		16.06	8.49702e-13	9.30802e-14	6.67973e-13	6.86587e-14	7.45655e-13	2.12207e-13
		16.07	8.52213e-13	9.26945e-14	6.63641e-13	6.38089e-14	7.44352e-13	2.13876e-13
		16.08	8.56337e-13	9.48893e-14	6.50522e-13	6.49168e-14	7.44163e-13	2.07569e-13
		16.09	8.51371e-13	9.27572e-14	6.52185e-13	6.5763e-14	7.45131e-13	2.11315e-13
		16.1	8.48612e-13	9.4992e-14	6.6163e-13	6.7754e-14	7.43745e-13	2.09898e-13
		16.11	8.49571e-13	9.23987e-14	6.64616e-13	6.19337e-14	7.40631e-13	2.10056e-13
		16.12	8.52653e-13	9.27658e-14	6.64178e-13	6.29881e-14	7.47357e-13	2.11201e-13
		16.13	8.50479e-13	9.18655e-14	6.60747e-13	6.58379e-14	7.43461e-13	2.12479e-13
		16.14	8.45476e-13	9.31753e-14	6.50883e-13	6.23649e-14	7.40685e-13	2.11665e-13
		16.15	8.51454e-13	9.25526e-14	6.57606e-13	6.12992e-14	7.38815e-13	2.10539e-13
		16.16	8.47084e-13	9.27372e-14	6.46388e-13	5.91721e-14	7.45188e-13	2.12088e-13
		16.17	8.46042e-13	9.26017e-14	6.58844e-13	5.80886e-14	7.37007e-13	2.09046e-13
		16.18	8.38381e-13	9.09224e-14	6.50762e-13	6.39196e-14	7.42511e-13	2.11828e-13
		16.19	8.40965e-13	9.13845e-14	6.52366e-13	6.76706e-14	7.38303e-13	2.10487e-13
		16.2	8.42409e-13	9.29256e-14	6.56484e-13	6.18634e-14	7.31563e-13	2.10158e-13
		16.21	8.38315e-13	9.22816e-14	6.57491e-13	5.97259e-14	7.35841e-13	2.07839e-13
		16.22	8.44414e-13	8.91101e-14	6.62521e-13	5.85597e-14	7.30672e-13	2.11233e-13
		16.23	8.43291e-13	8.96698e-14	6.51921e-13	6.59362e-14	7.30726e-13	2.0539e-13
		16.24	8.43325e-13	8.96935e-14	6.5349e-13	6.30886e-14	7.34651e-13	2.08628e-13
		16.25	8.4158e-13	8.9728e-14	6.48521e-13	6.93675e-14	7.28163e-13	2.08247e-13
		16.26	8.32257e-13	9.20945e-14	6.48437e-13	6.34889e-14	7.32684e-13	2.07686e-13
		16.27	8.37237e-13	9.12656e-14	6.48157e-13	6.76925e-14	7.31403e-13	2.09209e-13
		16.28	8.29888e-13	9.26345e-14	6.45155e-13	6.05707e-14	7.27198e-13	2.09011e-13
		16.29	8.36664e-13	8.98478e-14	6.43294e-13	6.61297e-14	7.27668e-13	2.08145e-13
		16.3	8.36192e-13	9.19498e-14	6.43427e-13	6.99722e-14	7.25085e-13	2.09514e-13
		16.31	8.31552e-13	9.21918e-14	6.43603e-13	6.30361e-14	7.25832e-13	2.10987e-13
		16.32	8.35251e-13	9.16867e-14	6.49018e-13	5.94962e-14	7.22508e-13	2.08702e-13
		16.33	8.32634e-13	9.07712e-14	6.45585e-13	6.48564e-14	7.24865e-13	2.08569e-13
		16.34	8.25769e-13	9.33762e-14	6.46573e-13	6.0167e-14	7.22411e-13	2.07298e-13
		16.35	8.28139e-13	9.26233e-14	6.48829e-13	6.84302e-14	7.26734e-13	2.10112e-13
		16.36	8.26628e-13	9.1162e-14	6.37508e-13	5.86207e-14	7.22808e-13	2.06485e-13
		16.37	8.29398e-13	9.23169e-14	6.46931e-13	6.87324e-14	7.25204e-13	2.07368e-13
		16.38	8.22175e-13	9.39646e-14	6.39967e-13	6.61139e-14	7.18632e-13	2.07762e-13
		16.39	8.25438e-13	9.2364e-14	6.25682e-13	6.53235e-14	7.18213e-13	2.07822e-13
		16.4	8.32798e-13	9.11069e-14	6.4596e-13	6.44288e-14	7.18032e-13	2.08193e-13
		16.41	8.2217e-13	9.18832e-14	6.44669e-13	6.5131e-14	7.12956e-13	2.06051e-13
		16.42	8.29061e-13	9.21189e-14	6.41834e-13	6.43681e-14	7.14651e-13	2.06383e-13
		16.43	8.3033e-13	9.2584e-14	6.30244e-13	5.7272e-14	7.16323e-13	2.05145e-13
		16.44	8.24676e-13	9.11589e-14	6.33143e-13	6.14599e-14	7.17765e-13	2.04631e-13
		16.45	8.29887e-13	9.22906e-14	6.34555e-13	6.50704e-14	7.13183e-13	2.06088e-13
		16.46	8.2677e-13	9.15791e-14	6.28019e-13	6.218e-14	7.10131e-13	2.04966e-13
		16.47	8.24572e-13	9.3279e-14	6.36058e-13	6.55219e-14	7.12701e-13	2.05876e-13
		16.48	8.122e-13	9.25164e-14	6.30522e-13	6.48638e-14	7.13838e-13	2.05954e-13
		16.49	8.18713e-13	9.40371e-14	6.32052e-13	6.21567e-14	7.1169e-13	2.02427e-13
		16.5	8.21245e-13	9.23699e-14	6.42588e-13	7.2277e-14	7.1825e-13	2.05174e-13
		16.51	8.191e-13	9.24127e-14	6.26586e-13	6.99309e-14	7.12106e-13	2.02206e-13
		16.52	8.21879e-13	9.31418e-14	6.19644e-13	6.69493e-14	7.14484e-13	2.07536e-13
		16.53	8.16787e-13	9.2672e-14	6.28427e-13	6.40679e-14	7.16157e-13	2.05694e-13
		16.54	8.16741e-13	9.19981e-14	6.32097e-13	7.0773e-14	7.16782e-13	2.03546e-13
		16.55	8.1655e-13	9.34134e-14	6.25643e-13	6.51894e-14	7.12437e-13	2.02073e-13
		16.56	8.17535e-13	9.13311e-14	6.3151e-13	6.061e-14	7.10234e-13	2.05428e-13
		16.57	8.12629e-13	9.20609e-14	6.32264e-13	6.52055e-14	7.11435e-13	2.0394e-13
		16.58	8.12766e-13	9.1917e-14	6.20286e-13	6.60803e-14	7.09057e-13	2.05191e-13
		16.59	8.11407e-13	9.11673e-14	6.31301e-13	6.69419e-14	7.1175e-13	2.01892e-13
		16.6	8.12587e-13	9.04432e-14	6.26977e-13	6.92989e-14	7.1062e-13	2.03572e-13
		16.61	8.16832e-13	9.11889e-14	6.19997e-13	6.53797e-14	7.09223e-13	2.01523e-13
		16.62	8.09628e-13	9.06727e-14	6.29759e-13	7.55591e-14	7.08603e-13	2.038e-13
		16.63	8.16301e-13	9.21322e-14	6.24496e-13	6.24216e-14	7.08536e-13	2.00429e-13
		16.64	8.14931e-13	9.14489e-14	6.24109e-13	5.9622e-14	7.04738e-13	2.01474e-13
		16.65	8.12047e-13	9.10028e-14	6.20107e-13	6.68446e-14	7.07642e-13	1.99769e-13
		16.66	8.10981e-13	9.26602e-14	6.17935e-13	6.28861e-14	7.05557e-13	2.01937e-13
		16.67	8.1217e-13	9.22463e-14	6.11332e-13	6.07287e-14	7.05373e-13	2.01904e-13
		16.68	8.09544e-13	9.10025e-14	6.08031e-13	6.18056e-14	7.0574e-13	2.02197e-13
		16.69	8.08367e-13	9.26812e-14	6.17523e-13	6.75831e-14	7.07161e-13	2.00764e-13
		16.7	8.1206e-13	9.26098e-14	6.17536e-13	6.86988e-14	7.09634e-13	2.01881e-13
		16.71	8.11367e-13	9.48986e-14	6.1767e-13	6.55518e-14	7.02211e-13	2.01164e-13
		16.72	8.10908e-13	9.24586e-14	6.14409e-13	6.39226e-14	7.01188e-13	2.03402e-13
		16.73	8.08715e-13	9.1314e-14	6.04113e-13	6.19803e-14	7.022e-13	2.00378e-13
		16.74	8.06064e-13	9.39939e-14	6.16771e-13	6.71791e-14	7.08479e-13	2.00748e-13
		16.75	8.08806e-13	9.22914e-14	6.17173e-13	6.55029e-14	7.0361e-13	2.00336e-13
		16.76	8.03369e-13	9.12384e-14	6.13731e-13	7.39962e-14	6.93594e-13	2.00453e-13
		16.77	8.01041e-13	9.01276e-14	6.16713e-13	6.90155e-14	6.96685e-13	2.00624e-13
		16.78	8.01143e-13	8.92378e-14	6.15389e-13	6.48697e-14	6.95673e-13	1.99894e-13
		16.79	8.04847e-13	9.04649e-14	6.08564e-13	6.96935e-14	6.97325e-13	1.98713e-13
		16.8	8.04213e-13	8.83781e-14	6.10125e-13	6.39304e-14	6.95953e-13	2.00104e-13
		16.81	8.01167e-13	9.07134e-14	6.16483e-13	7.05883e-14	6.93606e-13	2.00521e-13
		16.82	8.05083e-13	8.87667e-14	6.05983e-13	6.53461e-14	6.93432e-13	1.99105e-13
		16.83	7.99636e-13	9.04927e-14	5.99181e-13	6.3414e-14	6.98145e-13	1.97834e-13
		16.84	7.97637e-13	8.91071e-14	6.06365e-13	6.54934e-14	6.97226e-13	1.98372e-13
		16.85	7.96274e-13	8.99219e-14	6.01705e-13	6.74385e-14	6.98378e-13	1.95182e-13
		16.86	7.91104e-13	9.19987e-14	6.10023e-13	6.63408e-14	6.97338e-13	1.97497e-13
		16.87	7.94446e-13	9.12179e-14	5.9393e-13	6.72466e-14	6.94472e-13	1.97899e-13
		16.88	7.9731e-13	8.90588e-14	6.00135e-13	6.33648e-14	6.94818e-13	1.99573e-13
		16.89	7.96169e-13	9.07077e-14	6.03467e-13	7.29832e-14	7.0263e-13	1.99124e-13
		16.9	7.9598e-13	8.94012e-14	5.99641e-13	7.57364e-14	6.98141e-13	1.99748e-13
		16.91	7.93042e-13	9.03752e-14	6.05664e-13	6.55351e-14	6.94273e-13	1.94507e-13
		16.92	7.87577e-13	9.22118e-14	6.05454e-13	6.1127e-14	6.97077e-13	1.96159e-13
		16.93	7.91081e-13	8.92325e-14	6.00727e-13	6.99472e-14	6.91019e-13	1.95258e-13
		16.94	7.87988e-13	8.84982e-14	6.07704e-13	6.86719e-14	6.95487e-13	1.97176e-13
		16.95	7.84005e-13	9.08048e-14	6.06984e-13	6.37359e-14	6.91765e-13	1.93141e-13
		16.96	7.89203e-13	8.99117e-14	6.07962e-13	7.23546e-14	6.94615e-13	1.94325e-13
		16.97	7.91725e-13	8.90173e-14	5.98445e-13	6.58913e-14	6.90147e-13	1.95823e-13
		16.98	7.90174e-13	8.83725e-14	5.97036e-13	6.40258e-14	6.94526e-13	1.95039e-13
		16.99	7.8626e-13	8.85692e-14	5.99679e-13	6.44748e-14	6.90826e-13	1.94763e-13
		17	7.90463e-13	8.77796e-14	6.04025e-13	7.7147e-14	6.91735e-13	1.96079e-13
		17.01	7.84015e-13	8.79504e-14	5.9392e-13	6.60983e-14	6.87761e-13	1.93777e-13
		17.02	7.86983e-13	8.94127e-14	5.86637e-13	5.9496e-14	6.88331e-13	1.94187e-13
		17.03	7.90419e-13	8.77509e-14	5.97366e-13	6.10345e-14	6.89066e-13	1.94535e-13
		17.04	7.84818e-13	8.58724e-14	5.94689e-13	6.79764e-14	6.86555e-13	1.95266e-13
		17.05	7.82567e-13	8.72225e-14	6.01931e-13	6.7058e-14	6.85034e-13	1.95268e-13
		17.06	7.82546e-13	8.80178e-14	5.8869e-13	6.4478e-14	6.85754e-13	1.95985e-13
		17.07	7.84163e-13	8.84853e-14	6.08951e-13	6.01549e-14	6.85908e-13	1.95819e-13
		17.08	7.8458e-13	8.67718e-14	5.93343e-13	5.87121e-14	6.87826e-13	1.94113e-13
		17.09	7.78211e-13	8.82786e-14	5.90429e-13	6.63741e-14	6.79167e-13	1.93757e-13
		17.1	7.80359e-13	8.61858e-14	5.8553e-13	6.97158e-14	6.83413e-13	1.93787e-13
		17.11	7.8204e-13	8.62833e-14	5.94065e-13	6.62317e-14	6.83059e-13	1.92896e-13
		17.12	7.77489e-13	8.82091e-14	5.86865e-13	6.45449e-14	6.85424e-13	1.94846e-13
		17.13	7.77542e-13	8.64622e-14	5.93477e-13	7.2157e-14	6.76206e-13	1.92582e-13
		17.14	7.74695e-13	8.72171e-14	5.93461e-13	6.97827e-14	6.78866e-13	1.92998e-13
		17.15	7.72938e-13	8.52204e-14	5.9613e-13	6.7559e-14	6.76008e-13	1.92683e-13
		17.16	7.77708e-13	8.58813e-14	5.80145e-13	6.28117e-14	6.74933e-13	1.92965e-13
		17.17	7.75273e-13	8.56147e-14	6.02216e-13	6.51396e-14	6.75485e-13	1.92234e-13
		17.18	7.77088e-13	8.53109e-14	5.88866e-13	6.04598e-14	6.80133e-13	1.91149e-13
		17.19	7.72697e-13	8.50787e-14	5.88548e-13	6.39965e-14	6.81719e-13	1.93804e-13
		17.2	7.70566e-13	8.54696e-14	5.82127e-13	5.89798e-14	6.75967e-13	1.91764e-13
		17.21	7.69167e-13	8.47119e-14	5.79647e-13	7.03585e-14	6.78473e-13	1.93259e-13
		17.22	7.75262e-13	8.39873e-14	5.76827e-13	6.50507e-14	6.74406e-13	1.90386e-13
		17.23	7.68534e-13	8.40336e-14	5.87826e-13	6.36673e-14	6.77967e-13	1.92394e-13
		17.24	7.71108e-13	8.4254e-14	5.66885e-13	6.30499e-14	6.75332e-13	1.91305e-13
		17.25	7.66391e-13	8.43113e-14	5.93594e-13	6.46592e-14	6.76751e-13	1.9502e-13
		17.26	7.61422e-13	8.46026e-14	5.82007e-13	5.92624e-14	6.75944e-13	1.93417e-13
		17.27	7.6717e-13	8.54714e-14	5.86907e-13	6.40171e-14	6.77352e-13	1.93616e-13
		17.28	7.71643e-13	8.54027e-14	5.8269e-13	6.66178e-14	6.78861e-13	1.91602e-13
		17.29	7.68623e-13	8.6367e-14	5.86067e-13	6.87961e-14	6.72741e-13	1.92079e-13
		17.3	7.63156e-13	8.66787e-14	5.90193e-13	6.23486e-14	6.72126e-13	1.91308e-13
		17.31	7.66721e-13	8.57811e-14	5.82449e-13	6.13311e-14	6.72063e-13	1.90156e-13
		17.32	7.6311e-13	8.52204e-14	5.72152e-13	6.60593e-14	6.68516e-13	1.90933e-13
		17.33	7.638e-13	8.19898e-14	5.82882e-13	6.74061e-14	6.6684e-13	1.89524e-13
		17.34	7.63777e-13	8.40918e-14	5.77757e-13	6.90944e-14	6.71169e-13	1.90171e-13
		17.35	7.63522e-13	8.60459e-14	5.69437e-13	6.07752e-14	6.71473e-13	1.92962e-13
		17.36	7.62072e-13	8.75629e-14	5.78125e-13	7.26005e-14	6.69595e-13	1.929e-13
		17.37	7.62125e-13	8.6169e-14	5.7347e-13	5.97259e-14	6.67426e-13	1.90661e-13
		17.38	7.55375e-13	8.61792e-14	5.6885e-13	6.78409e-14	6.71372e-13	1.92822e-13
		17.39	7.62106e-13	8.7101e-14	5.74507e-13	6.16018e-14	6.68523e-13	1.94012e-13
		17.4	7.58709e-13	8.60411e-14	5.73606e-13	7.30218e-14	6.69181e-13	1.9027e-13
		17.41	7.56614e-13	8.73069e-14	5.74026e-13	6.56311e-14	6.71215e-13	1.89873e-13
		17.42	7.57985e-13	8.83522e-14	5.77085e-13	6.81262e-14	6.71863e-13	1.89886e-13
		17.43	7.59191e-13	8.77142e-14	5.78821e-13	6.84192e-14	6.71818e-13	1.91442e-13
		17.44	7.59712e-13	8.54445e-14	5.75786e-13	7.00193e-14	6.69345e-13	1.92603e-13
		17.45	7.55137e-13	8.63644e-14	5.72429e-13	6.72461e-14	6.61818e-13	1.90962e-13
		17.46	7.58514e-13	8.69398e-14	5.61832e-13	7.28198e-14	6.64931e-13	1.92754e-13
		17.47	7.54285e-13	8.61174e-14	5.77614e-13	6.75896e-14	6.64782e-13	1.89341e-13
		17.48	7.57704e-13	8.68687e-14	5.69421e-13	6.34202e-14	6.60074e-13	1.90351e-13
		17.49	7.53509e-13	8.56862e-14	5.52853e-13	6.99134e-14	6.66597e-13	1.90835e-13
		17.5	7.53942e-13	8.75193e-14	5.73114e-13	6.32333e-14	6.68692e-13	1.89934e-13
		17.51	7.56076e-13	8.65906e-14	5.6339e-13	6.50929e-14	6.58837e-13	1.88368e-13
		17.52	7.51452e-13	8.81561e-14	5.57996e-13	6.33893e-14	6.59771e-13	1.91748e-13
		17.53	7.54265e-13	8.83376e-14	5.59897e-13	6.33037e-14	6.62516e-13	1.90215e-13
		17.54	7.57481e-13	8.60201e-14	5.61226e-13	5.87609e-14	6.60496e-13	1.87264e-13
		17.55	7.51509e-13	8.78505e-14	5.52039e-13	6.41786e-14	6.64131e-13	1.91055e-13
		17.56	7.53174e-13	8.73065e-14	5.58284e-13	6.65774e-14	6.58491e-13	1.88067e-13
		17.57	7.52603e-13	8.67769e-14	5.55741e-13	6.24258e-14	6.6146e-13	1.87307e-13
		17.58	7.52131e-13	8.49376e-14	5.59459e-13	7.16799e-14	6.53591e-13	1.876e-13
		17.59	7.51711e-13	8.68516e-14	5.58551e-13	6.87657e-14	6.62459e-13	1.89362e-13
		17.6	7.50613e-13	8.83849e-14	5.54899e-13	6.52684e-14	6.63348e-13	1.91683e-13
		17.61	7.43189e-13	8.76829e-14	5.62689e-13	7.20692e-14	6.55066e-13	1.89118e-13
		17.62	7.43705e-13	8.65667e-14	5.52824e-13	6.54031e-14	6.51853e-13	1.88151e-13
		17.63	7.44568e-13	8.88378e-14	5.54087e-13	6.18162e-14	6.49758e-13	1.89843e-13
		17.64	7.45973e-13	8.90627e-14	5.56147e-13	6.60279e-14	6.58138e-13	1.90086e-13
		17.65	7.4599e-13	8.66788e-14	5.57738e-13	6.37589e-14	6.53341e-13	1.86644e-13
		17.66	7.40845e-13	8.71777e-14	5.55375e-13	6.60806e-14	6.52735e-13	1.86109e-13
		17.67	7.38564e-13	8.56789e-14	5.57272e-13	7.04803e-14	6.57849e-13	1.89832e-13
		17.68	7.42054e-13	8.66624e-14	5.56662e-13	6.61066e-14	6.60052e-13	1.87238e-13
		17.69	7.42537e-13	8.53648e-14	5.61448e-13	6.94309e-14	6.59084e-13	1.8664e-13
		17.7	7.4224e-13	8.56841e-14	5.53992e-13	6.71073e-14	6.55485e-13	1.86196e-13
		17.71	7.45799e-13	8.57587e-14	5.38289e-13	7.37747e-14	6.49651e-13	1.86763e-13
		17.72	7.40502e-13	8.65371e-14	5.53077e-13	6.8309e-14	6.4948e-13	1.87693e-13
		17.73	7.3975e-13	8.42483e-14	5.61701e-13	6.57133e-14	6.5614e-13	1.89625e-13
		17.74	7.36192e-13	8.45236e-14	5.38376e-13	6.15989e-14	6.55944e-13	1.85832e-13
		17.75	7.35753e-13	8.58162e-14	5.45624e-13	5.89454e-14	6.55848e-13	1.86449e-13
		17.76	7.36155e-13	8.54562e-14	5.57031e-13	6.27856e-14	6.57469e-13	1.87808e-13
		17.77	7.36332e-13	8.65448e-14	5.48472e-13	5.50492e-14	6.54116e-13	1.85317e-13
		17.78	7.37275e-13	8.4813e-14	5.44878e-13	5.84888e-14	6.55291e-13	1.85609e-13
		17.79	7.36707e-13	8.49206e-14	5.46097e-13	6.45649e-14	6.53077e-13	1.85007e-13
		17.8	7.38052e-13	8.71165e-14	5.5052e-13	6.54205e-14	6.59028e-13	1.88117e-13
		17.81	7.31756e-13	8.57479e-14	5.3942e-13	6.71366e-14	6.49931e-13	1.85182e-13
		17.82	7.30052e-13	8.37097e-14	5.51633e-13	6.40763e-14	6.49557e-13	1.85571e-13
		17.83	7.30043e-13	8.54175e-14	5.52376e-13	6.49998e-14	6.55879e-13	1.87438e-13
		17.84	7.36645e-13	8.53253e-14	5.47028e-13	6.93278e-14	6.46026e-13	1.84495e-13
		17.85	7.34223e-13	8.42057e-14	5.5348e-13	7.20701e-14	6.50512e-13	1.86359e-13
		17.86	7.3442e-13	8.51267e-14	5.35496e-13	6.88229e-14	6.50417e-13	1.84166e-13
		17.87	7.28877e-13	8.34896e-14	5.45662e-13	6.7684e-14	6.49524e-13	1.83542e-13
		17.88	7.30561e-13	8.49182e-14	5.48015e-13	6.82816e-14	6.46169e-13	1.84583e-13
		17.89	7.31259e-13	8.61908e-14	5.36918e-13	6.04113e-14	6.51552e-13	1.85511e-13
		17.9	7.2743e-13	8.51616e-14	5.4753e-13	6.54155e-14	6.48675e-13	1.84072e-13
		17.91	7.26771e-13	8.3645e-14	5.49217e-13	6.21802e-14	6.45349e-13	1.86152e-13
		17.92	7.29749e-13	8.43171e-14	5.49604e-13	6.52918e-14	6.46319e-13	1.85909e-13
		17.93	7.31984e-13	8.54471e-14	5.48313e-13	6.27574e-14	6.42893e-13	1.83142e-13
		17.94	7.27866e-13	8.34285e-14	5.341e-13	6.52496e-14	6.45721e-13	1.84269e-13
		17.95	7.23063e-13	8.27242e-14	5.41686e-13	6.22965e-14	6.44349e-13	1.8385e-13
		17.96	7.28209e-13	8.69765e-14	5.54668e-13	6.24448e-14	6.41756e-13	1.83411e-13
		17.97	7.21997e-13	8.53116e-14	5.36148e-13	6.55077e-14	6.41155e-13	1.83027e-13
		17.98	7.28416e-13	8.40091e-14	5.46253e-13	7.47061e-14	6.47265e-13	1.83652e-13
		17.99	7.2363e-13	8.41049e-14	5.41725e-13	6.88682e-14	6.41977e-13	1.83697e-13
		18	7.26383e-13	8.49298e-14	5.36403e-13	6.38356e-14	6.44247e-13	1.81022e-13
		18.01	7.24212e-13	8.43201e-14	5.40621e-13	6.2209e-14	6.4407e-13	1.80579e-13
		18.02	7.21899e-13	8.78556e-14	5.42011e-13	6.21003e-14	6.4389e-13	1.83692e-13
		18.03	7.22802e-13	8.54082e-14	5.42305e-13	6.36002e-14	6.42559e-13	1.84249e-13
		18.04	7.16621e-13	8.49228e-14	5.35916e-13	5.87461e-14	6.44086e-13	1.83233e-13
		18.05	7.22432e-13	8.57863e-14	5.30564e-13	5.22621e-14	6.38686e-13	1.81592e-13
		18.06	7.1436e-13	8.52553e-14	5.42713e-13	6.83421e-14	6.44284e-13	1.81986e-13
		18.07	7.16876e-13	8.28495e-14	5.35972e-13	6.63348e-14	6.38898e-13	1.82796e-13
		18.08	7.20064e-13	8.33331e-14	5.35099e-13	6.84434e-14	6.42133e-13	1.8428e-13
		18.09	7.21106e-13	8.21721e-14	5.29525e-13	6.54777e-14	6.39209e-13	1.83853e-13
		18.1	7.21436e-13	8.19427e-14	5.29435e-13	5.94237e-14	6.39733e-13	1.82099e-13
		18.11	7.16707e-13	8.46937e-14	5.39185e-13	7.33754e-14	6.30923e-13	1.80471e-13
		18.12	7.19954e-13	8.2562e-14	5.34513e-13	6.63317e-14	6.38683e-13	1.81128e-13
		18.13	7.16015e-13	8.34729e-14	5.31203e-13	6.00435e-14	6.36458e-13	1.80547e-13
		18.14	7.15454e-13	8.44722e-14	5.20129e-13	6.46404e-14	6.37347e-13	1.8357e-13
		18.15	7.18688e-13	8.53678e-14	5.34872e-13	5.86785e-14	6.3189e-13	1.80934e-13
		18.16	7.19202e-13	8.45537e-14	5.34883e-13	6.43191e-14	6.31537e-13	1.80632e-13
		18.17	7.14596e-13	8.64819e-14	5.35342e-13	6.65188e-14	6.37596e-13	1.81387e-13
		18.18	7.08325e-13	8.69342e-14	5.24941e-13	6.57781e-14	6.31339e-13	1.80279e-13
		18.19	7.0987e-13	8.43533e-14	5.25432e-13	6.47055e-14	6.33054e-13	1.83505e-13
		18.2	7.08575e-13	8.36929e-14	5.28536e-13	6.40384e-14	6.32573e-13	1.78786e-13
		18.21	7.13095e-13	8.44509e-14	5.36842e-13	6.54811e-14	6.31428e-13	1.79471e-13
		18.22	7.0522e-13	8.53997e-14	5.20192e-13	6.27929e-14	6.35976e-13	1.83222e-13
		18.23	7.09728e-13	8.44879e-14	5.30344e-13	6.79194e-14	6.33055e-13	1.82515e-13
		18.24	7.09358e-13	8.47786e-14	5.26492e-13	6.67115e-14	6.33055e-13	1.80825e-13
		18.25	7.14992e-13	8.45238e-14	5.25353e-13	6.60802e-14	6.34914e-13	1.80838e-13
		18.26	7.17103e-13	8.49984e-14	5.25966e-13	6.42903e-14	6.32396e-13	1.80821e-13
		18.27	7.10292e-13	8.48978e-14	5.22873e-13	6.68401e-14	6.26031e-13	1.79646e-13
		18.28	7.1124e-13	8.43567e-14	5.20908e-13	6.41425e-14	6.30405e-13	1.78921e-13
		18.29	7.08356e-13	8.49063e-14	5.08599e-13	6.35566e-14	6.33484e-13	1.77156e-13
		18.3	7.079e-13	8.27315e-14	5.09331e-13	6.65465e-14	6.37317e-13	1.78071e-13
		18.31	7.0601e-13	8.58837e-14	5.20378e-13	6.39402e-14	6.33336e-13	1.78932e-13
[truncated: 7,285 more rows]
