# Supplementary material for: Physiological roles of endocytosis and presynaptic scaffold in vesicle replenishment at fast and slow central synapses
Source: eLife. 2024 Jun 3;12:RP90497. doi: 10.7554/eLife.90497 (PMC11147502; doi:10.7554/eLife.90497)
Supplement: Figure 4—figure supplement 1—source data 1. [file elife-90497-fig4-figsupp1-data1.xlsx]

## Sheet: Perfusion-PreIncubation_Panel B
			Panel B_normalized EPSC amplitude vs stimulation (#)
			2.0 mM calcium, 100 HZ, and PT (37°C)			Perfusion		Pre-incubation
			Stimulation (#)	Control		Latrunculin-A		Latrunculin-A
				Mean	SEM	Mean	SEM	Mean	SEM
			1	1	0	1	0	1	0
			2	0.761015	0.01982	0.570435	0.0502187	0.811935	0.0411127
			3	0.573607	0.0188227	0.421494	0.0394861	0.659864	0.0534834
			4	0.493164	0.0215203	0.320383	0.0298884	0.517866	0.0323929
			5	0.436344	0.024584	0.299578	0.0223225	0.458273	0.0341627
			6	0.410231	0.0132378	0.257861	0.0255035	0.401498	0.0375893
			7	0.373094	0.0164758	0.249665	0.0331457	0.385588	0.0511053
			8	0.360884	0.0173073	0.211199	0.0291657	0.343605	0.0212965
			9	0.349693	0.0203486	0.178154	0.020978	0.336857	0.0381654
			10	0.342688	0.0209994	0.181471	0.0236412	0.293762	0.0300985
			11	0.331577	0.0191319	0.185546	0.0222298	0.27995	0.0325153
			12	0.331262	0.0207866	0.175836	0.0209234	0.29036	0.0243421
			13	0.316939	0.021625	0.177131	0.0143097	0.236923	0.0154236
			14	0.31319	0.0233206	0.184063	0.0145123	0.288891	0.0289854
			15	0.309862	0.0219979	0.185261	0.0185934	0.282451	0.0209429
			16	0.327082	0.0207924	0.195879	0.0179247	0.256176	0.0278749
			17	0.31378	0.0217717	0.186739	0.0137715	0.253057	0.0406589
			18	0.313584	0.0217319	0.200663	0.0138802	0.282078	0.0153784
			19	0.321833	0.0156913	0.186211	0.010912	0.276839	0.0383042
			20	0.320791	0.0173136	0.189072	0.0186877	0.254309	0.030651
			21	0.322698	0.0210711	0.206517	0.015123	0.262613	0.0290784
			22	0.322967	0.0226746	0.209882	0.0186807	0.28756	0.0262073
			23	0.319487	0.0183637	0.208488	0.0206184	0.250907	0.00965382
			24	0.308858	0.018789	0.202133	0.00862355	0.250401	0.0241888
			25	0.319336	0.0202178	0.201304	0.0133662	0.272472	0.0345925
			26	0.317002	0.0168427	0.182496	0.0181582	0.298615	0.034233
			27	0.317088	0.0189123	0.201218	0.0117347	0.264969	0.0129316
			28	0.33258	0.0217752	0.181202	0.0125061	0.226104	0.0274014
			29	0.319416	0.018473	0.178011	0.0132992	0.299925	0.0144601
			30	0.308497	0.0167398	0.191142	0.0142842	0.245788	0.0245542

## Sheet: Perfusion_Panel C
			Panel C_normalized EPSC amplitude vs stimulation (#)
			1.3 mM calcium, 100 HZ, and PT (37°C)			Perfusion
			Stimulation (#)	Control		Latrunculin-A		Latrunculin-B
				Mean	SEM	Mean	SEM	Mean	SEM
			1	1	0	1	0	1	0
			2	0.902711	0.0426543	0.580311	0.0880743	0.581527	0.0479835
			3	0.746789	0.0315415	0.392754	0.0232711	0.420118	0.0430944
			4	0.666713	0.0377911	0.32008	0.0120737	0.32289	0.0232845
			5	0.575858	0.0213848	0.249395	0.0129874	0.281571	0.0303533
			6	0.578478	0.0353282	0.234157	0.0175549	0.2531	0.0232513
			7	0.536648	0.0283194	0.233463	0.012439	0.236244	0.0220895
			8	0.501271	0.0374915	0.202603	0.00857547	0.228231	0.0174534
			9	0.523246	0.040911	0.194549	0.00708273	0.197897	0.0175699
			10	0.485879	0.0347397	0.19264	0.0164314	0.192829	0.0162927
			11	0.468923	0.0282225	0.166017	0.00902661	0.177935	0.0124324
			12	0.463271	0.0299638	0.168171	0.0142717	0.158887	0.0150088
			13	0.451801	0.0287472	0.159098	0.0188416	0.182923	0.0138075
			14	0.413486	0.0225628	0.147182	0.00589988	0.154417	0.0145584
			15	0.439633	0.0281694	0.146063	0.0139038	0.169794	0.0166472
			16	0.448762	0.024656	0.176068	0.0156083	0.162477	0.0130491
			17	0.406235	0.0146909	0.148262	0.013505	0.178183	0.0127439
			18	0.435015	0.0296879	0.175411	0.0123778	0.18085	0.0118184
			19	0.420906	0.0271135	0.170842	0.0219176	0.188307	0.015517
			20	0.385791	0.0279214	0.16786	0.0132046	0.178766	0.018966
			21	0.427388	0.0268806	0.16371	0.0178007	0.169149	0.0169869
			22	0.391313	0.0207245	0.183134	0.0186915	0.186588	0.0195064
			23	0.419158	0.0282176	0.158659	0.00946576	0.192168	0.0193752
			24	0.419054	0.0254294	0.184786	0.0168722	0.190607	0.0164161
			25	0.435207	0.026671	0.199876	0.0197638	0.195486	0.0131509
			26	0.409677	0.0341758	0.174879	0.0226484	0.19186	0.0141827
			27	0.409594	0.0254172	0.177362	0.0157953	0.176253	0.0188601
			28	0.428174	0.0286494	0.175996	0.0085048	0.162417	0.00954057
			29	0.423023	0.0225903	0.195777	0.0132283	0.19125	0.0133708
			30	0.419534	0.0226294	0.168032	0.00942406	0.168332	0.017964
