# Supplementary material for: Physiological roles of endocytosis and presynaptic scaffold in vesicle replenishment at fast and slow central synapses
Source: eLife. 2024 Jun 3;12:RP90497. doi: 10.7554/eLife.90497 (PMC11147502; doi:10.7554/eLife.90497)
Supplement: Figure 5—source data 1. [file elife-90497-fig5-data1.xlsx]

## Sheet: 100 Hz data, Fig 5A
			Figure 5A_normalized EPSC amplitude vs time (s)								Figure 5A_normalized EPSC amplitude vs time (s)									Figure 5A_exponential fitting vs points					Figure 5A_exponential fitting vs points
			Time (s)	Control		Dynasore		Pitstop-2			Time (s)	Control		ML141		Latrunculin-B				Points	Control	Dynasore	Pitstop-2		Points	Control	ML141	Latrunculin-B
				Mean	SEM	Mean	SEM	Mean	SEM			Mean	SEM	Mean	SEM	Mean	SEM
			0.01	1	0	1	0	1	0		0.01	1	0	1	0	1	0			1	1.0112	1.00003	1.00097		1	1.0112	1.00201	1.00012
			0.02	0.914144	0.0450156	0.5977	0.0315106	0.645389	0.0630804		0.02	0.914144	0.0450156	0.648648	0.0451633	0.581527	0.0479835			2	0.988123	0.897905	0.921092		2	0.988123	0.929753	0.907108
			0.03	0.742523	0.0342344	0.474434	0.0304129	0.471125	0.0605262		0.03	0.742523	0.0342344	0.474133	0.0385719	0.420118	0.0430944			3	0.965947	0.817006	0.854059		3	0.965947	0.865731	0.82853
			0.04	0.66649	0.0413973	0.418989	0.0322916	0.41132	0.0479439		0.04	0.66649	0.0413973	0.37095	0.0388614	0.32289	0.0232845			4	0.944634	0.752385	0.797262		4	0.944634	0.808924	0.761785
			0.05	0.581314	0.0226505	0.362429	0.0263397	0.359824	0.0476437		0.05	0.581314	0.0226505	0.338816	0.0320094	0.281571	0.0303533			5	0.924151	0.700273	0.748666		5	0.924151	0.758444	0.704766
			0.06	0.576572	0.0386438	0.350706	0.0293184	0.333619	0.0415068		0.06	0.576572	0.0386438	0.32926	0.0324795	0.2531	0.0232513			6	0.904466	0.657797	0.706679		6	0.904466	0.713516	0.65576
			0.07	0.536316	0.0310202	0.310697	0.0239441	0.297825	0.039141		0.07	0.536316	0.0310202	0.280854	0.0225269	0.236244	0.0220895			7	0.885548	0.622769	0.670058		7	0.885548	0.673461	0.613382
			0.08	0.497604	0.040873	0.29163	0.0275791	0.284	0.0341389		0.08	0.497604	0.040873	0.283922	0.026005	0.228231	0.0174534			8	0.867367	0.593517	0.637827		8	0.867367	0.637687	0.576501
			0.09	0.519302	0.044607	0.296033	0.0224868	0.255027	0.0255284		0.09	0.519302	0.044607	0.268543	0.0205343	0.197897	0.0175699			9	0.849894	0.568766	0.609215		9	0.849894	0.605676	0.544201
			0.1	0.487858	0.0379936	0.276632	0.0230961	0.264619	0.0346852		0.1	0.487858	0.0379936	0.248473	0.0239578	0.192829	0.0162927			10	0.833102	0.547542	0.583616		10	0.833102	0.576976	0.515731
			0.11	0.459895	0.0292918	0.276539	0.0255992	0.229698	0.0313587		0.11	0.459895	0.0292918	0.241856	0.027022	0.177935	0.0124324			11	0.816964	0.529099	0.560548		11	0.816964	0.551192	0.490481
			0.12	0.47583	0.0298012	0.256811	0.0140434	0.224701	0.0290179		0.12	0.47583	0.0298012	0.230051	0.0266919	0.158887	0.0150088			12	0.801454	0.512865	0.539627		12	0.801454	0.527977	0.467952
			0.13	0.448902	0.0313305	0.257974	0.0302239	0.253395	0.0322619		0.13	0.448902	0.0313305	0.211777	0.0178102	0.182923	0.0138075			13	0.786549	0.498403	0.520544		13	0.786549	0.507028	0.447732
			0.14	0.416092	0.0245509	0.259182	0.0178315	0.243804	0.0225715		0.14	0.416092	0.0245509	0.230278	0.0187511	0.154417	0.0145584			14	0.772224	0.485375	0.503052		14	0.772224	0.488082	0.429487
			0.15	0.434895	0.0304184	0.235412	0.0224448	0.226618	0.0206004		0.15	0.434895	0.0304184	0.215986	0.0205285	0.169794	0.0166472			15	0.758458	0.473521	0.486948		15	0.758458	0.470905	0.412937
			0.16	0.448356	0.0270056	0.257353	0.0227807	0.23829	0.0205518		0.16	0.448356	0.0270056	0.216262	0.0236448	0.162477	0.0130491			16	0.745227	0.46264	0.472067		16	0.745227	0.455295	0.397854
			0.17	0.407943	0.0159838	0.246994	0.0209921	0.219572	0.017704		0.17	0.407943	0.0159838	0.207503	0.0205309	0.178183	0.0127439			17	0.732512	0.452576	0.458273		17	0.732512	0.441074	0.384048
			0.18	0.428792	0.031799	0.243105	0.0208552	0.24198	0.026184		0.18	0.428792	0.031799	0.200283	0.0186943	0.18085	0.0118184			18	0.720292	0.443205	0.445452		18	0.720292	0.428085	0.371359
			0.19	0.425482	0.0292754	0.235934	0.0190862	0.269604	0.0312515		0.19	0.425482	0.0292754	0.21201	0.0156099	0.188307	0.015517			19	0.708548	0.434434	0.433508		19	0.708548	0.416193	0.359655
			0.2	0.391545	0.0299297	0.253771	0.020191	0.244607	0.0216805		0.2	0.391545	0.0299297	0.226163	0.0183879	0.178766	0.018966			20	0.697262	0.426185	0.422361		20	0.697262	0.405277	0.348824
			0.21	0.421153	0.0286433	0.234479	0.017581	0.244302	0.0227884		0.21	0.421153	0.0286433	0.217661	0.0187963	0.169149	0.0169869			21	0.686415	0.418399	0.411941		21	0.686415	0.395231	0.338773
			0.22	0.3925	0.0226653	0.263234	0.0283438	0.27294	0.0293331		0.22	0.3925	0.0226653	0.218581	0.0203636	0.186588	0.0195064			22	0.675991	0.411026	0.402187		22	0.675991	0.385964	0.329422
			0.23	0.422186	0.0307324	0.248844	0.0223272	0.256275	0.0231348		0.23	0.422186	0.0307324	0.217353	0.0206203	0.192168	0.0193752			23	0.665973	0.404027	0.393047		23	0.665973	0.377393	0.320701
			0.24	0.419849	0.0278429	0.248334	0.0188104	0.256184	0.0256702		0.24	0.419849	0.0278429	0.226462	0.0220197	0.190607	0.0164161			24	0.656345	0.39737	0.384475		24	0.656345	0.369447	0.312553
			0.25	0.4346	0.029209	0.25112	0.0140347	0.255766	0.0283821		0.25	0.4346	0.029209	0.225878	0.0199997	0.195486	0.0131509			25	0.647092	0.391028	0.376429		25	0.647092	0.362063	0.304926
			0.26	0.415703	0.0368512	0.248305	0.0194366	0.25466	0.0295577		0.26	0.415703	0.0368512	0.235097	0.0262531	0.19186	0.0141827			26	0.6382	0.384977	0.368872		26	0.6382	0.355185	0.297777
			0.27	0.406538	0.0276412	0.231788	0.023151	0.257265	0.026458		0.27	0.406538	0.0276412	0.220935	0.0177079	0.176253	0.0188601			27	0.629654	0.379199	0.361772		27	0.629654	0.348764	0.291067
			0.28	0.436486	0.0300338	0.266371	0.0185599	0.2718	0.0276005		0.28	0.436486	0.0300338	0.221161	0.0196431	0.162417	0.00954057			28	0.621441	0.373676	0.355096		28	0.621441	0.342757	0.284762
			0.29	0.419118	0.0243738	0.242547	0.0212499	0.244749	0.0285684		0.29	0.419118	0.0243738	0.209164	0.0217632	0.19125	0.0133708			29	0.613548	0.368393	0.348819		29	0.613548	0.337125	0.278831
			0.3	0.418004	0.0247326	0.246563	0.0226868	0.255022	0.0279999		0.3	0.418004	0.0247326	0.221799	0.0223185	0.168332	0.017964			30	0.605962	0.363338	0.342914		30	0.605962	0.331835	0.273248
																				31	0.598672	0.358498	0.337358		31	0.598672	0.326855	0.267988
																				32	0.591666	0.353862	0.332129		32	0.591666	0.322161	0.263029
																				33	0.584932	0.349422	0.327208		33	0.584932	0.317727	0.258352
																				34	0.578461	0.345167	0.322575		34	0.578461	0.313532	0.253939
																				35	0.572242	0.341089	0.318214		35	0.572242	0.309558	0.249774
																				36	0.566266	0.337181	0.314108		36	0.566266	0.305788	0.24584
																				37	0.560522	0.333434	0.310241		37	0.560522	0.302206	0.242124
																				38	0.555002	0.329843	0.3066		38	0.555002	0.298799	0.238613
																				39	0.549696	0.326399	0.303172		39	0.549696	0.295554	0.235295
																				40	0.544598	0.323098	0.299943		40	0.544598	0.292461	0.232159
																				41	0.539698	0.319932	0.296902		41	0.539698	0.28951	0.229195
																				42	0.534989	0.316897	0.294038		42	0.534989	0.286691	0.226392
																				43	0.530464	0.313986	0.291341		43	0.530464	0.283997	0.223742
																				44	0.526114	0.311196	0.288801		44	0.526114	0.281419	0.221235
																				45	0.521934	0.308519	0.286408		45	0.521934	0.278951	0.218865
																				46	0.517917	0.305953	0.284155		46	0.517917	0.276588	0.216623
																				47	0.514057	0.303492	0.282032		47	0.514057	0.274322	0.214503
																				48	0.510347	0.301132	0.280033		48	0.510347	0.272149	0.212497
																				49	0.506781	0.298869	0.27815		49	0.506781	0.270065	0.2106
																				50	0.503354	0.296699	0.276377		50	0.503354	0.268064	0.208805
																				51	0.500061	0.294618	0.274706		51	0.500061	0.266142	0.207107
																				52	0.496896	0.292622	0.273133		52	0.496896	0.264295	0.205501
																				53	0.493854	0.290708	0.271651		53	0.493854	0.262521	0.203981
																				54	0.490931	0.288873	0.270255		54	0.490931	0.260816	0.202544
																				55	0.488122	0.287113	0.26894		55	0.488122	0.259175	0.201183
																				56	0.485422	0.285425	0.267702		56	0.485422	0.257598	0.199897
																				57	0.482827	0.283806	0.266536		57	0.482827	0.25608	0.198679
																				58	0.480334	0.282254	0.265437		58	0.480334	0.25462	0.197527
																				59	0.477937	0.280765	0.264402		59	0.477937	0.253214	0.196437
																				60	0.475634	0.279338	0.263427		60	0.475634	0.251861	0.195406
																				61	0.47342	0.277969	0.262509		61	0.47342	0.250558	0.19443
																				62	0.471293	0.276656	0.261645		62	0.471293	0.249304	0.193507
																				63	0.469249	0.275397	0.26083		63	0.469249	0.248096	0.192634
																				64	0.467284	0.27419	0.260063		64	0.467284	0.246932	0.191807
																				65	0.465396	0.273032	0.25934		65	0.465396	0.245811	0.191025
																				66	0.463581	0.271922	0.25866		66	0.463581	0.244731	0.190286
																				67	0.461837	0.270857	0.258018		67	0.461837	0.243691	0.189586
																				68	0.460161	0.269836	0.257415		68	0.460161	0.242688	0.188923
																				69	0.45855	0.268857	0.256846		69	0.45855	0.241722	0.188297
																				70	0.457002	0.267918	0.25631		70	0.457002	0.240791	0.187704
																				71	0.455515	0.267018	0.255805		71	0.455515	0.239894	0.187143
																				72	0.454085	0.266154	0.25533		72	0.454085	0.23903	0.186612
																				73	0.452711	0.265326	0.254882		73	0.452711	0.238196	0.186109
																				74	0.45139	0.264532	0.254461		74	0.45139	0.237393	0.185634
																				75	0.450121	0.26377	0.254064		75	0.450121	0.236619	0.185185
																				76	0.448902	0.26304	0.253689		76	0.448902	0.235873	0.184759
																				77	0.44773	0.262339	0.253337		77	0.44773	0.235153	0.184356
																				78	0.446603	0.261668	0.253005		78	0.446603	0.23446	0.183976
																				79	0.445521	0.261024	0.252692		79	0.445521	0.233791	0.183615
																				80	0.44448	0.260406	0.252398		80	0.44448	0.233146	0.183274
																				81	0.44348	0.259813	0.252121		81	0.44348	0.232525	0.182952
																				82	0.442519	0.259245	0.251859		82	0.442519	0.231926	0.182646
																				83	0.441596	0.258701	0.251613		83	0.441596	0.231348	0.182357
																				84	0.440708	0.258178	0.251382		84	0.440708	0.230791	0.182084
																				85	0.439855	0.257677	0.251163		85	0.439855	0.230255	0.181825
																				86	0.439035	0.257197	0.250958		86	0.439035	0.229737	0.181581
																				87	0.438248	0.256736	0.250764		87	0.438248	0.229238	0.181349
																				88	0.43749	0.256294	0.250581		88	0.43749	0.228757	0.18113
																				89	0.436763	0.255871	0.25041		89	0.436763	0.228293	0.180923
																				90	0.436064	0.255464	0.250248		90	0.436064	0.227845	0.180727
																				91	0.435392	0.255075	0.250095		91	0.435392	0.227414	0.180541
																				92	0.434746	0.254701	0.249952		92	0.434746	0.226998	0.180366
																				93	0.434125	0.254343	0.249816		93	0.434125	0.226597	0.1802
																				94	0.433528	0.253999	0.249689		94	0.433528	0.22621	0.180042
																				95	0.432955	0.253669	0.249569		95	0.432955	0.225837	0.179894
																				96	0.432404	0.253353	0.249456		96	0.432404	0.225478	0.179753
																				97	0.431875	0.25305	0.24935		97	0.431875	0.225131	0.17962
																				98	0.431366	0.25276	0.249249		98	0.431366	0.224797	0.179494
																				99	0.430877	0.252481	0.249155		99	0.430877	0.224475	0.179375
																				100	0.430407	0.252214	0.249066		100	0.430407	0.224164	0.179262
																				101	0.429955	0.251957	0.248982		101	0.429955	0.223864	0.179155
																				102	0.429521	0.251711	0.248903		102	0.429521	0.223575	0.179054
																				103	0.429104	0.251476	0.248829		103	0.429104	0.223297	0.178958
																				104	0.428703	0.25125	0.248759		104	0.428703	0.223028	0.178868
																				105	0.428317	0.251033	0.248693		105	0.428317	0.222769	0.178783
																				106	0.427947	0.250825	0.248631		106	0.427947	0.222519	0.178702
																				107	0.427591	0.250626	0.248572		107	0.427591	0.222278	0.178625
																				108	0.427249	0.250434	0.248517		108	0.427249	0.222046	0.178553
																				109	0.426921	0.250251	0.248465		109	0.426921	0.221822	0.178484
																				110	0.426605	0.250075	0.248416		110	0.426605	0.221606	0.178419
																				111	0.426301	0.249907	0.24837		111	0.426301	0.221398	0.178358
																				112	0.426009	0.249745	0.248327		112	0.426009	0.221197	0.1783
																				113	0.425729	0.24959	0.248286		113	0.425729	0.221003	0.178245
																				114	0.425459	0.249441	0.248247		114	0.425459	0.220816	0.178193
																				115	0.4252	0.249299	0.248211		115	0.4252	0.220636	0.178144
																				116	0.424952	0.249162	0.248177		116	0.424952	0.220463	0.178097
																				117	0.424712	0.249031	0.248145		117	0.424712	0.220295	0.178053
																				118	0.424482	0.248905	0.248115		118	0.424482	0.220134	0.178011
																				119	0.424262	0.248784	0.248086		119	0.424262	0.219978	0.177972
																				120	0.424049	0.248669	0.248059		120	0.424049	0.219828	0.177935
																				121	0.423845	0.248558	0.248034		121	0.423845	0.219683	0.177899
																				122	0.423649	0.248451	0.24801		122	0.423649	0.219544	0.177866
																				123	0.423461	0.248349	0.247987		123	0.423461	0.219409	0.177834
																				124	0.42328	0.248251	0.247966		124	0.42328	0.21928	0.177804
																				125	0.423105	0.248158	0.247946		125	0.423105	0.219154	0.177776
																				126	0.422938	0.248068	0.247928		126	0.422938	0.219034	0.177749
																				127	0.422777	0.247981	0.24791		127	0.422777	0.218917	0.177724
																				128	0.422623	0.247899	0.247893		128	0.422623	0.218805	0.1777
																				129	0.422474	0.247819	0.247878		129	0.422474	0.218697	0.177677
																				130	0.422332	0.247743	0.247863		130	0.422332	0.218593	0.177656
																				131	0.422195	0.24767	0.247849		131	0.422195	0.218492	0.177636
																				132	0.422063	0.2476	0.247836		132	0.422063	0.218395	0.177616
																				133	0.421936	0.247533	0.247823		133	0.421936	0.218302	0.177598
																				134	0.421814	0.247469	0.247812		134	0.421814	0.218211	0.177581
																				135	0.421697	0.247407	0.247801		135	0.421697	0.218124	0.177565
																				136	0.421585	0.247348	0.247791		136	0.421585	0.218041	0.177549
																				137	0.421477	0.247291	0.247781		137	0.421477	0.21796	0.177535
																				138	0.421373	0.247237	0.247772		138	0.421373	0.217882	0.177521
																				139	0.421273	0.247185	0.247763		139	0.421273	0.217806	0.177508
																				140	0.421177	0.247135	0.247755		140	0.421177	0.217734	0.177496
																				141	0.421085	0.247087	0.247747		141	0.421085	0.217664	0.177484
																				142	0.420997	0.247041	0.24774		142	0.420997	0.217597	0.177473
																				143	0.420911	0.246996	0.247733		143	0.420911	0.217532	0.177462
																				144	0.42083	0.246954	0.247727		144	0.42083	0.217469	0.177453
																				145	0.420751	0.246914	0.247721		145	0.420751	0.217409	0.177443
																				146	0.420675	0.246875	0.247715		146	0.420675	0.21735	0.177434
																				147	0.420603	0.246837	0.24771		147	0.420603	0.217294	0.177426
																				148	0.420533	0.246801	0.247705		148	0.420533	0.21724	0.177418
																				149	0.420466	0.246767	0.2477		149	0.420466	0.217188	0.177411
																				150	0.420401	0.246734	0.247696		150	0.420401	0.217137	0.177403
																				151	0.42034	0.246703	0.247691		151	0.42034	0.217089	0.177397
																				152	0.42028	0.246672	0.247688		152	0.42028	0.217042	0.17739
																				153	0.420223	0.246643	0.247684		153	0.420223	0.216997	0.177384
																				154	0.420168	0.246615	0.24768		154	0.420168	0.216953	0.177379
																				155	0.420115	0.246589	0.247677		155	0.420115	0.216911	0.177373
																				156	0.420064	0.246563	0.247674		156	0.420064	0.21687	0.177368
																				157	0.420015	0.246539	0.247671		157	0.420015	0.216831	0.177363
																				158	0.419968	0.246515	0.247668		158	0.419968	0.216794	0.177359
																				159	0.419923	0.246492	0.247666		159	0.419923	0.216757	0.177354
																				160	0.41988	0.246471	0.247663		160	0.41988	0.216722	0.17735
																				161	0.419838	0.24645	0.247661		161	0.419838	0.216689	0.177347
																				162	0.419798	0.24643	0.247659		162	0.419798	0.216656	0.177343
																				163	0.41976	0.246411	0.247657		163	0.41976	0.216625	0.177339
																				164	0.419723	0.246393	0.247655		164	0.419723	0.216594	0.177336
																				165	0.419687	0.246375	0.247653		165	0.419687	0.216565	0.177333
																				166	0.419653	0.246358	0.247651		166	0.419653	0.216537	0.17733
																				167	0.41962	0.246342	0.247649		167	0.41962	0.21651	0.177327
																				168	0.419589	0.246327	0.247648		168	0.419589	0.216484	0.177325
																				169	0.419559	0.246312	0.247647		169	0.419559	0.216458	0.177322
																				170	0.419529	0.246298	0.247645		170	0.419529	0.216434	0.17732
																				171	0.419502	0.246284	0.247644		171	0.419502	0.216411	0.177318
																				172	0.419475	0.246271	0.247643		172	0.419475	0.216388	0.177316
																				173	0.419449	0.246258	0.247642		173	0.419449	0.216366	0.177314
																				174	0.419424	0.246246	0.247641		174	0.419424	0.216345	0.177312
																				175	0.4194	0.246235	0.24764		175	0.4194	0.216325	0.17731
																				176	0.419377	0.246224	0.247639		176	0.419377	0.216305	0.177308
																				177	0.419355	0.246213	0.247638		177	0.419355	0.216286	0.177307
																				178	0.419334	0.246203	0.247637		178	0.419334	0.216268	0.177305
																				179	0.419313	0.246193	0.247636		179	0.419313	0.216251	0.177304
																				180	0.419294	0.246184	0.247635		180	0.419294	0.216234	0.177302
																				181	0.419275	0.246175	0.247635		181	0.419275	0.216217	0.177301
																				182	0.419257	0.246166	0.247634		182	0.419257	0.216202	0.1773
																				183	0.41924	0.246158	0.247633		183	0.41924	0.216186	0.177299
																				184	0.419223	0.24615	0.247633		184	0.419223	0.216172	0.177298
																				185	0.419207	0.246142	0.247632		185	0.419207	0.216158	0.177297
																				186	0.419192	0.246135	0.247632		186	0.419192	0.216144	0.177296
																				187	0.419177	0.246128	0.247631		187	0.419177	0.216131	0.177295
																				188	0.419162	0.246121	0.247631		188	0.419162	0.216118	0.177294
																				189	0.419149	0.246115	0.24763		189	0.419149	0.216106	0.177293
																				190	0.419136	0.246109	0.24763		190	0.419136	0.216094	0.177292
																				191	0.419123	0.246103	0.24763		191	0.419123	0.216083	0.177292
																				192	0.419111	0.246097	0.247629		192	0.419111	0.216072	0.177291
																				193	0.419099	0.246092	0.247629		193	0.419099	0.216061	0.17729
																				194	0.419088	0.246086	0.247628		194	0.419088	0.216051	0.17729
																				195	0.419077	0.246081	0.247628		195	0.419077	0.216041	0.177289
																				196	0.419067	0.246077	0.247628		196	0.419067	0.216032	0.177288
																				197	0.419057	0.246072	0.247628		197	0.419057	0.216023	0.177288
																				198	0.419047	0.246068	0.247627		198	0.419047	0.216014	0.177287
																				199	0.419038	0.246063	0.247627		199	0.419038	0.216006	0.177287
																				200	0.419029	0.246059	0.247627		200	0.419029	0.215997	0.177286

## Sheet: 100 Hz data, Fig 5C
		Figure 5C_sample EPSC traces						Figure 5C_normalized EPSC amplitude vs stimulation (#)										Fig 5C_average depression at EPSCs (#26-30)
		Time (s)	Control	Dynasore	Latrunculin-B	Dyn + Lat-B		Stimulation (#)	Control		Dynasore		Latrunculin-B		Dyn + Lat-B				Control	Dynasore	Latrunculin-B	Dyn + Lat-B
									Mean	SEM	Mean	SEM	Mean	SEM	Mean	SEM		Mean	0.42	0.247	0.18	0.165
		0	-1.37905e-10	-1.08577e-10	-3.94996e-10	-1.49949e-09		1	1	0	1	0	1	0	1	0		SEM	0.025	0.019	0.013	0.018
		2e-05	-1.35409e-10	-1.08577e-10	-3.9562e-10	-1.50011e-09		2	0.914144	0.0450156	0.5977	0.0315106	0.581527	0.0479835	0.508187	0.0363773		n number	11	10	8	11
		4e-05	-1.37281e-10	-1.07329e-10	-3.9562e-10	-1.50261e-09		3	0.742523	0.0342344	0.474434	0.0304129	0.420118	0.0430944	0.362245	0.0360036		p-value	vs Control	3e-05	4e-07	1.33365e-07
		6e-05	-1.37281e-10	-1.05457e-10	-3.95308e-10	-1.50261e-09		4	0.66649	0.0413973	0.418989	0.0322916	0.32289	0.0232845	0.301792	0.0323276		p-value	--	vs Dynasore	0.012	0.005
		8e-05	-1.38529e-10	-1.04209e-10	-3.96244e-10	-1.50198e-09		5	0.581314	0.0226505	0.362429	0.0263397	0.281571	0.0303533	0.243554	0.0291542		p-value	--	--	vs Latrunculin-B	0.6
		0.0001	-1.40401e-10	-1.06081e-10	-3.96556e-10	-1.50198e-09		6	0.576572	0.0386438	0.350706	0.0293184	0.2531	0.0232513	0.23138	0.0250138
		0.00012	-1.39777e-10	-1.04833e-10	-3.96244e-10	-1.50323e-09		7	0.536316	0.0310202	0.310697	0.0239441	0.236244	0.0220895	0.201689	0.0247532
		0.00014	-1.39777e-10	-1.06081e-10	-3.96868e-10	-1.50011e-09		8	0.497604	0.040873	0.29163	0.0275791	0.228231	0.0174534	0.188986	0.0253248
		0.00016	-1.39153e-10	-1.07953e-10	-3.96556e-10	-1.49886e-09		9	0.519302	0.044607	0.296033	0.0224868	0.197897	0.0175699	0.173693	0.0216421
		0.00018	-1.37281e-10	-1.07329e-10	-3.94996e-10	-1.49574e-09		10	0.487858	0.0379936	0.276632	0.0230961	0.192829	0.0162927	0.146658	0.0194783
		0.0002	-1.36033e-10	-1.07329e-10	-3.94372e-10	-1.49512e-09		11	0.459895	0.0292918	0.276539	0.0255992	0.177935	0.0124324	0.148926	0.0206976
		0.00022	-1.37281e-10	-1.06705e-10	-3.93436e-10	-1.49325e-09		12	0.47583	0.0298012	0.256811	0.0140434	0.158887	0.0150088	0.141734	0.0204169
		0.00024	-1.36033e-10	-1.06081e-10	-3.93124e-10	-1.49137e-09		13	0.448902	0.0313305	0.257974	0.0302239	0.182923	0.0138075	0.15312	0.0178052
		0.00026	-1.37281e-10	-1.07329e-10	-3.925e-10	-1.492e-09		14	0.416092	0.0245509	0.259182	0.0178315	0.154417	0.0145584	0.145481	0.0158323
		0.00028	-1.38529e-10	-1.07953e-10	-3.92188e-10	-1.49137e-09		15	0.434895	0.0304184	0.235412	0.0224448	0.169794	0.0166472	0.160976	0.0180406
		0.0003	-1.40401e-10	-1.08577e-10	-3.925e-10	-1.49262e-09		16	0.448356	0.0270056	0.257353	0.0227807	0.162477	0.0130491	0.146173	0.0142568
		0.00032	-1.39777e-10	-1.09825e-10	-3.93124e-10	-1.49137e-09		17	0.407943	0.0159838	0.246994	0.0209921	0.178183	0.0127439	0.171946	0.019021
		0.00034	-1.38529e-10	-1.09825e-10	-3.93436e-10	-1.49013e-09		18	0.428792	0.031799	0.243105	0.0208552	0.18085	0.0118184	0.168054	0.0175054
		0.00036	-1.38529e-10	-1.08577e-10	-3.94372e-10	-1.48888e-09		19	0.425482	0.0292754	0.235934	0.0190862	0.188307	0.015517	0.172378	0.0137195
		0.00038	-1.38529e-10	-1.07953e-10	-3.9406e-10	-1.48763e-09		20	0.391545	0.0299297	0.253771	0.020191	0.178766	0.018966	0.170061	0.017871
		0.0004	-1.37281e-10	-1.08577e-10	-3.93436e-10	-1.48825e-09		21	0.421153	0.0286433	0.234479	0.017581	0.169149	0.0169869	0.159859	0.0193947
		0.00042	-1.36033e-10	-1.05457e-10	-3.92812e-10	-1.48763e-09		22	0.3925	0.0226653	0.263234	0.0283438	0.186588	0.0195064	0.177778	0.0197108
		0.00044	-1.36657e-10	-1.05457e-10	-3.92188e-10	-1.49013e-09		23	0.422186	0.0307324	0.248844	0.0223272	0.192168	0.0193752	0.173545	0.0215559
		0.00046	-1.35409e-10	-1.05457e-10	-3.91564e-10	-1.49075e-09		24	0.419849	0.0278429	0.248334	0.0188104	0.190607	0.0164161	0.173753	0.0227031
		0.00048	-1.34785e-10	-1.04209e-10	-3.91876e-10	-1.49137e-09		25	0.4346	0.029209	0.25112	0.0140347	0.195486	0.0131509	0.157285	0.0169181
		0.0005	-1.34161e-10	-1.04833e-10	-3.93124e-10	-1.49449e-09		26	0.415703	0.0368512	0.248305	0.0194366	0.19186	0.0141827	0.179267	0.0226236
		0.00052	-1.32913e-10	-1.02337e-10	-3.93124e-10	-1.49449e-09		27	0.406538	0.0276412	0.231788	0.023151	0.176253	0.0188601	0.150155	0.0146418
		0.00054	-1.35409e-10	-1.02961e-10	-3.93124e-10	-1.49574e-09		28	0.436486	0.0300338	0.266371	0.0185599	0.162417	0.00954057	0.160399	0.0177068
		0.00056	-1.34161e-10	-1.02337e-10	-3.9406e-10	-1.49761e-09		29	0.419118	0.0243738	0.242547	0.0212499	0.19125	0.0133708	0.168074	0.0181685
		0.00058	-1.35409e-10	-1.03585e-10	-3.93748e-10	-1.49761e-09		30	0.418004	0.0247326	0.246563	0.0226868	0.168332	0.017964	0.168427	0.0195416
		0.0006	-1.38529e-10	-1.03585e-10	-3.91564e-10	-1.49761e-09
		0.00062	-1.38529e-10	-1.04833e-10	-3.92188e-10	-1.49761e-09
		0.00064	-1.38529e-10	-1.07329e-10	-3.91252e-10	-1.49637e-09
		0.00066	-1.39777e-10	-1.08577e-10	-3.925e-10	-1.49637e-09
		0.00068	-1.37905e-10	-1.07329e-10	-3.93124e-10	-1.49449e-09
		0.0007	-1.34785e-10	-1.07329e-10	-3.94372e-10	-1.49325e-09
		0.00072	-1.34785e-10	-1.06705e-10	-3.9562e-10	-1.49387e-09
		0.00074	-1.36033e-10	-1.07953e-10	-3.96868e-10	-1.49325e-09
		0.00076	-1.35409e-10	-1.07953e-10	-3.95308e-10	-1.49137e-09
		0.00078	-1.37281e-10	-1.07953e-10	-3.9562e-10	-1.49013e-09
		0.0008	-1.39153e-10	-1.07953e-10	-3.94996e-10	-1.49013e-09
		0.00082	-1.39777e-10	-1.07329e-10	-3.94684e-10	-1.48825e-09
		0.00084	-1.41649e-10	-1.07953e-10	-3.93436e-10	-1.48763e-09
		0.00086	-1.41649e-10	-1.07953e-10	-3.93436e-10	-1.48825e-09
		0.00088	-1.42273e-10	-1.07329e-10	-3.93436e-10	-1.4895e-09
		0.0009	-1.41025e-10	-1.07329e-10	-3.93436e-10	-1.4895e-09
		0.00092	-1.39777e-10	-1.06705e-10	-3.925e-10	-1.49262e-09
		0.00094	-1.37905e-10	-1.07953e-10	-3.91876e-10	-1.49325e-09
		0.00096	-1.36033e-10	-1.07953e-10	-3.91876e-10	-1.49387e-09
		0.00098	-1.34161e-10	-1.07953e-10	-3.925e-10	-1.49512e-09
		0.001	-1.30417e-10	-1.06705e-10	-3.93436e-10	-1.49574e-09
		0.00102	-1.31041e-10	-1.06081e-10	-3.94684e-10	-1.49512e-09
		0.00104	-1.31665e-10	-1.06705e-10	-3.94996e-10	-1.49449e-09
		0.00106	-1.32289e-10	-1.06705e-10	-3.94684e-10	-1.49449e-09
		0.00108	-1.33537e-10	-1.06705e-10	-3.94684e-10	-1.49574e-09
		0.0011	-1.36033e-10	-1.06081e-10	-3.92812e-10	-1.49574e-09
		0.00112	-1.38529e-10	-1.06081e-10	-3.925e-10	-1.49387e-09
		0.00114	-1.39153e-10	-1.07953e-10	-3.91876e-10	-1.49449e-09
		0.00116	-1.38529e-10	-1.04833e-10	-3.91876e-10	-1.49325e-09
		0.00118	-1.39153e-10	-1.05457e-10	-3.925e-10	-1.49262e-09
		0.0012	-1.37905e-10	-1.04209e-10	-3.93124e-10	-1.49387e-09
		0.00122	-1.38529e-10	-1.04209e-10	-3.94684e-10	-1.49512e-09
		0.00124	-1.39153e-10	-1.05457e-10	-3.9562e-10	-1.49449e-09
		0.00126	-1.36657e-10	-1.07329e-10	-3.96244e-10	-1.492e-09
		0.00128	-1.39153e-10	-1.06081e-10	-3.9562e-10	-1.49137e-09
		0.0013	-1.39777e-10	-1.05457e-10	-3.9562e-10	-1.48888e-09
		0.00132	-1.38529e-10	-1.06081e-10	-3.9562e-10	-1.48825e-09
		0.00134	-1.39153e-10	-1.04209e-10	-3.96868e-10	-1.48638e-09
		0.00136	-1.39153e-10	-1.03585e-10	-3.96556e-10	-1.48825e-09
		0.00138	-1.39153e-10	-1.02337e-10	-3.95308e-10	-1.49137e-09
		0.0014	-1.37281e-10	-1.02961e-10	-3.9406e-10	-1.49449e-09
		0.00142	-1.36033e-10	-1.02337e-10	-3.93748e-10	-1.49574e-09
		0.00144	-1.36657e-10	-1.03585e-10	-3.93748e-10	-1.49574e-09
		0.00146	-1.36033e-10	-1.04833e-10	-3.93436e-10	-1.49449e-09
		0.00148	-1.37905e-10	-1.05457e-10	-3.93436e-10	-1.49387e-09
		0.0015	-1.38529e-10	-1.07329e-10	-3.9406e-10	-1.49325e-09
		0.00152	-1.37905e-10	-1.07329e-10	-3.94372e-10	-1.49387e-09
		0.00154	-1.39153e-10	-1.08577e-10	-3.94996e-10	-1.49325e-09
		0.00156	-1.39777e-10	-1.08577e-10	-3.9562e-10	-1.49262e-09
		0.00158	-1.39777e-10	-1.08577e-10	-3.9562e-10	-1.492e-09
		0.0016	-1.39777e-10	-1.07953e-10	-3.96868e-10	-1.49013e-09
		0.00162	-1.38529e-10	-1.08577e-10	-3.97492e-10	-1.4895e-09
		0.00164	-1.39777e-10	-1.11073e-10	-3.99052e-10	-1.48888e-09
		0.00166	-1.39153e-10	-1.11697e-10	-3.9874e-10	-1.48888e-09
		0.00168	-1.38529e-10	-1.11073e-10	-3.98116e-10	-1.49013e-09
		0.0017	-1.36033e-10	-1.11073e-10	-3.97492e-10	-1.49013e-09
		0.00172	-1.33537e-10	-1.10449e-10	-3.96868e-10	-1.492e-09
		0.00174	-1.35409e-10	-1.10449e-10	-3.9562e-10	-1.49325e-09
		0.00176	-1.35409e-10	-1.09201e-10	-3.9562e-10	-1.49387e-09
		0.00178	-1.34785e-10	-1.09201e-10	-3.96868e-10	-1.49574e-09
		0.0018	-1.34785e-10	-1.09201e-10	-3.97492e-10	-1.49449e-09
		0.00182	-1.35409e-10	-1.09201e-10	-3.9718e-10	-1.492e-09
		0.00184	-1.33537e-10	-1.06705e-10	-3.97804e-10	-1.49013e-09
		0.00186	-1.34161e-10	-1.05457e-10	-3.97492e-10	-1.48638e-09
		0.00188	-1.34161e-10	-1.05457e-10	-3.9718e-10	-1.48389e-09
		0.0019	-1.34161e-10	-1.04209e-10	-3.96868e-10	-1.48451e-09
		0.00192	-1.34161e-10	-1.04833e-10	-3.96868e-10	-1.48513e-09
		0.00194	-1.35409e-10	-1.05457e-10	-3.9562e-10	-1.48638e-09
		0.00196	-1.34785e-10	-1.04833e-10	-3.95308e-10	-1.48763e-09
		0.00198	-1.34785e-10	-1.04833e-10	-3.94996e-10	-1.48825e-09
		0.002	-1.34161e-10	-1.04833e-10	-3.94684e-10	-1.49013e-09
		0.00202	-1.33537e-10	-1.07329e-10	-3.9406e-10	-1.49137e-09
		0.00204	-1.32289e-10	-1.05457e-10	-3.94684e-10	-1.49075e-09
		0.00206	-1.33537e-10	-1.06081e-10	-3.94372e-10	-1.49137e-09
		0.00208	-1.34161e-10	-1.06081e-10	-3.93436e-10	-1.4895e-09
		0.0021	-1.35409e-10	-1.06081e-10	-3.94372e-10	-1.4895e-09
		0.00212	-1.37281e-10	-1.06081e-10	-3.94372e-10	-1.49137e-09
		0.00214	-1.36033e-10	-1.06081e-10	-3.94684e-10	-1.49262e-09
		0.00216	-1.37281e-10	-1.07953e-10	-3.94684e-10	-1.49387e-09
		0.00218	-1.37905e-10	-1.06705e-10	-3.94996e-10	-1.49387e-09
		0.0022	-1.37905e-10	-1.09201e-10	-3.94372e-10	-1.49325e-09
		0.00222	-1.38529e-10	-1.09201e-10	-3.94372e-10	-1.492e-09
		0.00224	-1.39777e-10	-1.09825e-10	-3.93436e-10	-1.49262e-09
		0.00226	-1.41025e-10	-1.08577e-10	-3.925e-10	-1.49137e-09
		0.00228	-1.42273e-10	-1.09825e-10	-3.93748e-10	-1.49262e-09
		0.0023	-1.40401e-10	-1.08577e-10	-3.9406e-10	-1.49325e-09
		0.00232	-1.42897e-10	-1.07953e-10	-3.94684e-10	-1.49325e-09
		0.00234	-1.41025e-10	-1.06705e-10	-3.95308e-10	-1.49137e-09
		0.00236	-1.37281e-10	-1.05457e-10	-3.9562e-10	-1.49262e-09
		0.00238	-1.36033e-10	-1.05457e-10	-3.94996e-10	-1.492e-09
		0.0024	-1.34785e-10	-1.04209e-10	-3.95308e-10	-1.492e-09
		0.00242	-1.35409e-10	-1.06081e-10	-3.94684e-10	-1.492e-09
		0.00244	-1.36033e-10	-1.06705e-10	-3.9562e-10	-1.48888e-09
		0.00246	-1.37281e-10	-1.08577e-10	-3.9562e-10	-1.48888e-09
		0.00248	-1.36657e-10	-1.10449e-10	-3.96868e-10	-1.48763e-09
		0.0025	-1.37281e-10	-1.10449e-10	-3.9874e-10	-1.48888e-09
		0.00252	-1.36033e-10	-1.08577e-10	-3.99676e-10	-1.48888e-09
		0.00254	-1.37281e-10	-1.07953e-10	-3.99988e-10	-1.48825e-09
		0.00256	-1.34161e-10	-1.06081e-10	-3.99988e-10	-1.4895e-09
		0.00258	-1.33537e-10	-1.04833e-10	-3.99364e-10	-1.4895e-09
		0.0026	-1.33537e-10	-1.05457e-10	-3.98116e-10	-1.49013e-09
		0.00262	-1.34785e-10	-1.07953e-10	-3.96868e-10	-1.48825e-09
		0.00264	-1.35409e-10	-1.08577e-10	-3.94996e-10	-1.48888e-09
		0.00266	-1.36033e-10	-1.09201e-10	-3.93436e-10	-1.4895e-09
		0.00268	-1.38529e-10	-1.07953e-10	-3.93124e-10	-1.49075e-09
		0.0027	-1.39777e-10	-1.06705e-10	-3.925e-10	-1.49387e-09
		0.00272	-1.40401e-10	-1.04833e-10	-3.93124e-10	-1.49637e-09
		0.00274	-1.39777e-10	-1.04209e-10	-3.93436e-10	-1.49949e-09
		0.00276	-1.40401e-10	-1.04833e-10	-3.93436e-10	-1.50261e-09
		0.00278	-1.41025e-10	-1.05457e-10	-3.9406e-10	-1.50635e-09
		0.0028	-1.40401e-10	-1.08577e-10	-3.94372e-10	-1.50822e-09
		0.00282	-1.37905e-10	-1.09201e-10	-3.94684e-10	-1.51259e-09
		0.00284	-1.36033e-10	-1.09201e-10	-3.95308e-10	-1.51384e-09
		0.00286	-1.34161e-10	-1.08577e-10	-3.95308e-10	-1.51509e-09
		0.00288	-1.36033e-10	-1.10449e-10	-3.96556e-10	-1.51509e-09
		0.0029	-1.35409e-10	-1.08577e-10	-3.95932e-10	-1.51509e-09
		0.00292	-1.36657e-10	-1.07953e-10	-3.96244e-10	-1.51696e-09
		0.00294	-1.36657e-10	-1.06705e-10	-3.96556e-10	-1.51758e-09
		0.00296	-1.38529e-10	-1.06705e-10	-3.9718e-10	-1.51945e-09
		0.00298	-1.38529e-10	-1.07329e-10	-3.9718e-10	-1.51945e-09
		0.003	-1.41025e-10	-1.06705e-10	-3.96556e-10	-1.51883e-09
		0.00302	-1.40401e-10	-1.04833e-10	-3.96556e-10	-1.51883e-09
		0.00304	-1.41025e-10	-1.03585e-10	-3.94996e-10	-1.51883e-09
		0.00306	-1.41649e-10	-1.02337e-10	-3.94996e-10	-1.51821e-09
		0.00308	-1.40401e-10	-1.02337e-10	-3.94996e-10	-1.5207e-09
		0.0031	-1.39777e-10	-1.02961e-10	-3.9562e-10	-1.52507e-09
		0.00312	-1.39777e-10	-1.02961e-10	-3.95308e-10	-1.53318e-09
		0.00314	-1.39777e-10	-1.01713e-10	-3.95308e-10	-1.54441e-09
		0.00316	-1.37905e-10	-1.01089e-10	-3.94372e-10	-1.55253e-09
		0.00318	-1.36033e-10	-1.00465e-10	-3.93436e-10	-1.55814e-09
		0.0032	-1.36033e-10	-9.67209e-11	-3.92812e-10	-1.55939e-09
		0.00322	-1.37281e-10	-9.79689e-11	-3.93436e-10	-1.55814e-09
		0.00324	-1.39153e-10	-1.01089e-10	-3.93748e-10	-1.55315e-09
		0.00326	-1.42273e-10	-1.04833e-10	-3.95308e-10	-1.54753e-09
		0.00328	-1.46017e-10	-1.11073e-10	-3.97492e-10	-1.54192e-09
		0.0033	-1.52881e-10	-1.18561e-10	-4.00612e-10	-1.54129e-09
		0.00332	-1.58497e-10	-1.26049e-10	-4.04668e-10	-1.54129e-09
		0.00334	-1.64114e-10	-1.35409e-10	-4.0966e-10	-1.54317e-09
		0.00336	-1.67234e-10	-1.41649e-10	-4.13092e-10	-1.54753e-09
		0.00338	-1.73474e-10	-1.48513e-10	-4.18396e-10	-1.55502e-09
		0.0034	-1.7597e-10	-1.52257e-10	-4.21828e-10	-1.56376e-09
		0.00342	-1.78466e-10	-1.56001e-10	-4.2682e-10	-1.57187e-09
		0.00344	-1.80338e-10	-1.59745e-10	-4.31812e-10	-1.57873e-09
		0.00346	-1.80962e-10	-1.62242e-10	-4.35244e-10	-1.58435e-09
		0.00348	-1.8221e-10	-1.65986e-10	-4.38052e-10	-1.58997e-09
		0.0035	-1.82834e-10	-1.67234e-10	-4.40548e-10	-1.59683e-09
		0.00352	-1.8221e-10	-1.70354e-10	-4.41796e-10	-1.6012e-09
		0.00354	-1.8221e-10	-1.70354e-10	-4.4242e-10	-1.60494e-09
		0.00356	-1.82834e-10	-1.71602e-10	-4.4242e-10	-1.61056e-09
		0.00358	-1.81586e-10	-1.72226e-10	-4.41484e-10	-1.61493e-09
		0.0036	-1.82834e-10	-1.72226e-10	-4.42732e-10	-1.61742e-09
		0.00362	-1.80962e-10	-1.73474e-10	-4.43356e-10	-1.62117e-09
		0.00364	-1.80338e-10	-1.73474e-10	-4.4398e-10	-1.62242e-09
		0.00366	-1.79714e-10	-1.71602e-10	-4.4554e-10	-1.62242e-09
		0.00368	-1.80338e-10	-1.72226e-10	-4.46164e-10	-1.62366e-09
		0.0037	-1.78466e-10	-1.70978e-10	-4.46788e-10	-1.62304e-09
		0.00372	-1.78466e-10	-1.69106e-10	-4.47724e-10	-1.62242e-09
		0.00374	-1.78466e-10	-1.69106e-10	-4.48036e-10	-1.62366e-09
		0.00376	-1.77842e-10	-1.68482e-10	-4.4866e-10	-1.62366e-09
		0.00378	-1.78466e-10	-1.64738e-10	-4.49284e-10	-1.62429e-09
		0.0038	-1.77218e-10	-1.65986e-10	-4.5022e-10	-1.62616e-09
		0.00382	-1.77218e-10	-1.6661e-10	-4.5022e-10	-1.62678e-09
		0.00384	-1.7597e-10	-1.6661e-10	-4.51468e-10	-1.62491e-09
		0.00386	-1.76594e-10	-1.65986e-10	-4.51156e-10	-1.62366e-09
		0.00388	-1.74722e-10	-1.65362e-10	-4.51156e-10	-1.62242e-09
		0.0039	-1.74098e-10	-1.65362e-10	-4.5178e-10	-1.62242e-09
		0.00392	-1.74098e-10	-1.65362e-10	-4.51156e-10	-1.62242e-09
		0.00394	-1.74098e-10	-1.6349e-10	-4.49908e-10	-1.62429e-09
		0.00396	-1.77842e-10	-1.64114e-10	-4.49284e-10	-1.62554e-09
		0.00398	-1.80962e-10	-1.62242e-10	-4.49596e-10	-1.62678e-09
		0.004	-1.87826e-10	-1.62242e-10	-4.49284e-10	-1.62741e-09
		0.00402	-1.9781e-10	-1.60369e-10	-4.48972e-10	-1.62803e-09
		0.00404	-2.06546e-10	-1.57873e-10	-4.4866e-10	-1.62803e-09
		0.00406	-2.15906e-10	-1.57249e-10	-4.4866e-10	-1.62741e-09
		0.00408	-2.20898e-10	-1.56001e-10	-4.46788e-10	-1.62678e-09
		0.0041	-2.2901e-10	-1.56001e-10	-4.4554e-10	-1.62803e-09
		0.00412	-2.30882e-10	-1.55377e-10	-4.44292e-10	-1.62616e-09
		0.00414	-2.33378e-10	-1.55377e-10	-4.44292e-10	-1.62554e-09
		0.00416	-2.31506e-10	-1.56001e-10	-4.43668e-10	-1.62554e-09
		0.00418	-2.2901e-10	-1.55377e-10	-4.43044e-10	-1.62366e-09
		0.0042	-2.25266e-10	-1.56625e-10	-4.4242e-10	-1.62242e-09
		0.00422	-2.1965e-10	-1.56001e-10	-4.42108e-10	-1.62242e-09
		0.00424	-2.15906e-10	-1.56625e-10	-4.41796e-10	-1.62242e-09
		0.00426	-2.10914e-10	-1.57249e-10	-4.41796e-10	-1.62117e-09
		0.00428	-2.08418e-10	-1.57249e-10	-4.43044e-10	-1.61992e-09
		0.0043	-2.01554e-10	-1.55377e-10	-4.43044e-10	-1.61867e-09
		0.00432	-1.9781e-10	-1.54753e-10	-4.4398e-10	-1.61867e-09
		0.00434	-1.93442e-10	-1.55377e-10	-4.43356e-10	-1.61742e-09
		0.00436	-1.90322e-10	-1.54753e-10	-4.43356e-10	-1.6168e-09
		0.00438	-1.85954e-10	-1.55377e-10	-4.4242e-10	-1.61555e-09
		0.0044	-1.8221e-10	-1.56001e-10	-4.41172e-10	-1.61555e-09
		0.00442	-1.81586e-10	-1.55377e-10	-4.41172e-10	-1.61368e-09
		0.00444	-1.80338e-10	-1.56001e-10	-4.40236e-10	-1.6143e-09
		0.00446	-1.78466e-10	-1.57249e-10	-4.41172e-10	-1.61555e-09
		0.00448	-1.77218e-10	-1.55377e-10	-4.40236e-10	-1.61618e-09
		0.0045	-1.7597e-10	-1.54753e-10	-4.41484e-10	-1.6168e-09
		0.00452	-1.75346e-10	-1.52257e-10	-4.4242e-10	-1.6168e-09
		0.00454	-1.73474e-10	-1.49761e-10	-4.4242e-10	-1.6168e-09
		0.00456	-1.7285e-10	-1.49761e-10	-4.41484e-10	-1.61805e-09
		0.00458	-1.70978e-10	-1.46017e-10	-4.41484e-10	-1.61867e-09
		0.0046	-1.70978e-10	-1.45393e-10	-4.40236e-10	-1.62117e-09
		0.00462	-1.6973e-10	-1.44769e-10	-4.40548e-10	-1.62304e-09
		0.00464	-1.6973e-10	-1.46017e-10	-4.4086e-10	-1.61992e-09
		0.00466	-1.70978e-10	-1.46641e-10	-4.41172e-10	-1.61867e-09
		0.00468	-1.71602e-10	-1.46641e-10	-4.41172e-10	-1.61867e-09
		0.0047	-1.73474e-10	-1.47889e-10	-4.41484e-10	-1.6168e-09
		0.00472	-1.73474e-10	-1.47889e-10	-4.41796e-10	-1.61618e-09
		0.00474	-1.72226e-10	-1.48513e-10	-4.41484e-10	-1.61742e-09
		0.00476	-1.72226e-10	-1.49137e-10	-4.4086e-10	-1.6168e-09
		0.00478	-1.74098e-10	-1.46017e-10	-4.39924e-10	-1.6168e-09
		0.0048	-1.73474e-10	-1.46641e-10	-4.393e-10	-1.61493e-09
		0.00482	-1.7285e-10	-1.46017e-10	-4.38676e-10	-1.61368e-09
		0.00484	-1.72226e-10	-1.44145e-10	-4.38052e-10	-1.61243e-09
		0.00486	-1.70354e-10	-1.44145e-10	-4.37116e-10	-1.61181e-09
		0.00488	-1.69106e-10	-1.44145e-10	-4.38364e-10	-1.61181e-09
		0.0049	-1.67858e-10	-1.43521e-10	-4.38988e-10	-1.61181e-09
		0.00492	-1.67234e-10	-1.43521e-10	-4.40548e-10	-1.61368e-09
		0.00494	-1.6661e-10	-1.44769e-10	-4.41484e-10	-1.6143e-09
		0.00496	-1.68482e-10	-1.44145e-10	-4.4242e-10	-1.61555e-09
		0.00498	-1.68482e-10	-1.46017e-10	-4.43044e-10	-1.61493e-09
		0.005	-1.69106e-10	-1.46017e-10	-4.43668e-10	-1.61555e-09
		0.00502	-1.69106e-10	-1.44145e-10	-4.44604e-10	-1.61618e-09
		0.00504	-1.69106e-10	-1.44769e-10	-4.43668e-10	-1.61555e-09
		0.00506	-1.67858e-10	-1.43521e-10	-4.41796e-10	-1.61493e-09
		0.00508	-1.67234e-10	-1.44769e-10	-4.40548e-10	-1.61618e-09
		0.0051	-1.67858e-10	-1.44145e-10	-4.3774e-10	-1.61742e-09
		0.00512	-1.67858e-10	-1.44145e-10	-4.37116e-10	-1.61618e-09
		0.00514	-1.6661e-10	-1.46017e-10	-4.3618e-10	-1.61618e-09
		0.00516	-1.64738e-10	-1.45393e-10	-4.36804e-10	-1.61306e-09
		0.00518	-1.6349e-10	-1.43521e-10	-4.3774e-10	-1.61056e-09
		0.0052	-1.6349e-10	-1.44145e-10	-4.393e-10	-1.60557e-09
		0.00522	-1.62866e-10	-1.42273e-10	-4.38676e-10	-1.60182e-09
		0.00524	-1.61618e-10	-1.43521e-10	-4.38676e-10	-1.59745e-09
		0.00526	-1.61618e-10	-1.44769e-10	-4.37428e-10	-1.5987e-09
		0.00528	-1.60993e-10	-1.43521e-10	-4.3618e-10	-1.60057e-09
		0.0053	-1.61618e-10	-1.44769e-10	-4.3618e-10	-1.60307e-09
		0.00532	-1.61618e-10	-1.42897e-10	-4.37428e-10	-1.60619e-09
		0.00534	-1.62866e-10	-1.43521e-10	-4.3774e-10	-1.60619e-09
		0.00536	-1.62242e-10	-1.43521e-10	-4.38364e-10	-1.60432e-09
		0.00538	-1.62866e-10	-1.42273e-10	-4.38364e-10	-1.60494e-09
		0.0054	-1.64738e-10	-1.41649e-10	-4.38364e-10	-1.60369e-09
		0.00542	-1.62242e-10	-1.41025e-10	-4.38052e-10	-1.60182e-09
		0.00544	-1.62242e-10	-1.44145e-10	-4.38052e-10	-1.60245e-09
		0.00546	-1.6349e-10	-1.42897e-10	-4.38052e-10	-1.60494e-09
		0.00548	-1.59745e-10	-1.44145e-10	-4.38676e-10	-1.60682e-09
		0.0055	-1.59121e-10	-1.43521e-10	-4.38988e-10	-1.60869e-09
		0.00552	-1.60369e-10	-1.42273e-10	-4.39612e-10	-1.60619e-09
		0.00554	-1.59121e-10	-1.41649e-10	-4.393e-10	-1.60619e-09
		0.00556	-1.59745e-10	-1.41025e-10	-4.393e-10	-1.60494e-09
		0.00558	-1.60369e-10	-1.38529e-10	-4.38364e-10	-1.60432e-09
		0.0056	-1.62242e-10	-1.38529e-10	-4.38364e-10	-1.60619e-09
		0.00562	-1.62866e-10	-1.39153e-10	-4.38052e-10	-1.60432e-09
		0.00564	-1.62242e-10	-1.39153e-10	-4.37116e-10	-1.60432e-09
		0.00566	-1.62242e-10	-1.37281e-10	-4.37116e-10	-1.60557e-09
		0.00568	-1.64114e-10	-1.37905e-10	-4.36492e-10	-1.60494e-09
		0.0057	-1.62242e-10	-1.36033e-10	-4.35556e-10	-1.60432e-09
		0.00572	-1.61618e-10	-1.34785e-10	-4.34308e-10	-1.60432e-09
		0.00574	-1.60993e-10	-1.35409e-10	-4.34308e-10	-1.60557e-09
		0.00576	-1.59121e-10	-1.36657e-10	-4.3306e-10	-1.60369e-09
		0.00578	-1.57873e-10	-1.38529e-10	-4.33372e-10	-1.60619e-09
		0.0058	-1.58497e-10	-1.39153e-10	-4.32748e-10	-1.60682e-09
		0.00582	-1.57873e-10	-1.41649e-10	-4.32436e-10	-1.60619e-09
		0.00584	-1.57249e-10	-1.41025e-10	-4.32124e-10	-1.60432e-09
		0.00586	-1.58497e-10	-1.40401e-10	-4.32124e-10	-1.60245e-09
		0.00588	-1.58497e-10	-1.39153e-10	-4.32436e-10	-1.59933e-09
		0.0059	-1.58497e-10	-1.38529e-10	-4.3306e-10	-1.59745e-09
		0.00592	-1.60369e-10	-1.40401e-10	-4.3306e-10	-1.59558e-09
		0.00594	-1.60993e-10	-1.41025e-10	-4.32124e-10	-1.59558e-09
		0.00596	-1.60993e-10	-1.41025e-10	-4.3306e-10	-1.59745e-09
		0.00598	-1.60993e-10	-1.42273e-10	-4.3306e-10	-1.59745e-09
		0.006	-1.60369e-10	-1.41649e-10	-4.3462e-10	-1.59808e-09
		0.00602	-1.59745e-10	-1.43521e-10	-4.35244e-10	-1.59808e-09
		0.00604	-1.58497e-10	-1.44145e-10	-4.36492e-10	-1.59933e-09
		0.00606	-1.57873e-10	-1.44145e-10	-4.37428e-10	-1.5987e-09
		0.00608	-1.57249e-10	-1.42273e-10	-4.38364e-10	-1.59496e-09
		0.0061	-1.58497e-10	-1.41649e-10	-4.38364e-10	-1.58997e-09
		0.00612	-1.58497e-10	-1.42273e-10	-4.393e-10	-1.58185e-09
		0.00614	-1.60369e-10	-1.43521e-10	-4.39612e-10	-1.57062e-09
		0.00616	-1.6349e-10	-1.43521e-10	-4.4086e-10	-1.56189e-09
		0.00618	-1.65362e-10	-1.44769e-10	-4.41484e-10	-1.55502e-09
		0.0062	-1.64738e-10	-1.42273e-10	-4.40548e-10	-1.55565e-09
		0.00622	-1.64738e-10	-1.39777e-10	-4.393e-10	-1.55565e-09
		0.00624	-1.60369e-10	-1.37905e-10	-4.3618e-10	-1.56001e-09
		0.00626	-1.56625e-10	-1.33537e-10	-4.32748e-10	-1.56376e-09
		0.00628	-1.50385e-10	-1.27921e-10	-4.2994e-10	-1.56563e-09
		0.0063	-1.46017e-10	-1.22305e-10	-4.25572e-10	-1.56688e-09
		0.00632	-1.41025e-10	-1.16689e-10	-4.2214e-10	-1.56313e-09
		0.00634	-1.36033e-10	-1.09825e-10	-4.1902e-10	-1.55877e-09
		0.00636	-1.31041e-10	-1.02337e-10	-4.15588e-10	-1.55377e-09
		0.00638	-1.28545e-10	-9.54729e-11	-4.12468e-10	-1.54504e-09
		0.0064	-1.24801e-10	-8.98568e-11	-4.10596e-10	-1.53755e-09
		0.00642	-1.19809e-10	-8.48648e-11	-4.07476e-10	-1.53193e-09
		0.00644	-1.16689e-10	-8.17448e-11	-4.0498e-10	-1.52507e-09
		0.00646	-1.15441e-10	-7.86247e-11	-4.01236e-10	-1.51696e-09
		0.00648	-1.12945e-10	-7.61287e-11	-3.98116e-10	-1.51134e-09
		0.0065	-1.11073e-10	-7.23847e-11	-3.95932e-10	-1.50573e-09
		0.00652	-1.13569e-10	-7.05127e-11	-3.9406e-10	-1.50323e-09
		0.00654	-1.12945e-10	-6.92646e-11	-3.925e-10	-1.49949e-09
		0.00656	-1.12321e-10	-6.92646e-11	-3.91252e-10	-1.49574e-09
		0.00658	-1.13569e-10	-6.92646e-11	-3.89068e-10	-1.492e-09
		0.0066	-1.12321e-10	-6.80166e-11	-3.8782e-10	-1.48888e-09
		0.00662	-1.14817e-10	-7.11367e-11	-3.87508e-10	-1.48763e-09
		0.00664	-1.14817e-10	-6.92646e-11	-3.86572e-10	-1.48513e-09
		0.00666	-1.14817e-10	-7.05127e-11	-3.85324e-10	-1.48264e-09
		0.00668	-1.13569e-10	-7.05127e-11	-3.85012e-10	-1.47952e-09
		0.0067	-1.11697e-10	-6.86406e-11	-3.847e-10	-1.47702e-09
		0.00672	-1.13569e-10	-6.86406e-11	-3.847e-10	-1.47515e-09
		0.00674	-1.14193e-10	-6.80166e-11	-3.83764e-10	-1.47078e-09
		0.00676	-1.14817e-10	-6.80166e-11	-3.8314e-10	-1.46891e-09
		0.00678	-1.16065e-10	-6.98887e-11	-3.8314e-10	-1.46766e-09
		0.0068	-1.16689e-10	-7.11367e-11	-3.82204e-10	-1.46829e-09
		0.00682	-1.17313e-10	-7.23847e-11	-3.83764e-10	-1.46704e-09
		0.00684	-1.16689e-10	-7.48807e-11	-3.847e-10	-1.46829e-09
		0.00686	-1.17313e-10	-7.55047e-11	-3.85636e-10	-1.46953e-09
		0.00688	-1.17937e-10	-7.61287e-11	-3.85324e-10	-1.46891e-09
		0.0069	-1.17313e-10	-7.55047e-11	-3.85324e-10	-1.46829e-09
		0.00692	-1.19185e-10	-7.48807e-11	-3.85012e-10	-1.46641e-09
		0.00694	-1.20433e-10	-7.67527e-11	-3.84076e-10	-1.46579e-09
		0.00696	-1.19809e-10	-7.67527e-11	-3.8314e-10	-1.46704e-09
		0.00698	-1.21057e-10	-7.61287e-11	-3.82516e-10	-1.46953e-09
		0.007	-1.23553e-10	-7.73767e-11	-3.81892e-10	-1.47016e-09
		0.00702	-1.24177e-10	-7.73767e-11	-3.81892e-10	-1.47016e-09
		0.00704	-1.25425e-10	-7.98727e-11	-3.8158e-10	-1.47141e-09
		0.00706	-1.27921e-10	-7.86247e-11	-3.81892e-10	-1.46953e-09
		0.00708	-1.28545e-10	-7.98727e-11	-3.82516e-10	-1.46704e-09
		0.0071	-1.29793e-10	-8.04967e-11	-3.8314e-10	-1.46766e-09
		0.00712	-1.29169e-10	-7.98727e-11	-3.83764e-10	-1.46517e-09
		0.00714	-1.28545e-10	-8.17448e-11	-3.847e-10	-1.46579e-09
		0.00716	-1.27297e-10	-8.23688e-11	-3.85012e-10	-1.46766e-09
		0.00718	-1.26673e-10	-8.36168e-11	-3.847e-10	-1.46891e-09
		0.0072	-1.25425e-10	-8.54888e-11	-3.847e-10	-1.46953e-09
		0.00722	-1.27297e-10	-8.67368e-11	-3.85012e-10	-1.46953e-09
		0.00724	-1.27297e-10	-8.73608e-11	-3.84388e-10	-1.46891e-09
		0.00726	-1.27297e-10	-8.92328e-11	-3.85324e-10	-1.46766e-09
		0.00728	-1.27921e-10	-8.92328e-11	-3.85012e-10	-1.46704e-09
		0.0073	-1.28545e-10	-9.04808e-11	-3.86572e-10	-1.46641e-09
		0.00732	-1.28545e-10	-9.04808e-11	-3.847e-10	-1.46829e-09
		0.00734	-1.26673e-10	-9.04808e-11	-3.85948e-10	-1.46953e-09
		0.00736	-1.27921e-10	-8.98568e-11	-3.85012e-10	-1.47078e-09
		0.00738	-1.26673e-10	-9.04808e-11	-3.84388e-10	-1.47265e-09
		0.0074	-1.27297e-10	-8.92328e-11	-3.83452e-10	-1.47265e-09
		0.00742	-1.27297e-10	-8.79848e-11	-3.8314e-10	-1.47203e-09
		0.00744	-1.27297e-10	-8.86088e-11	-3.84076e-10	-1.47016e-09
		0.00746	-1.27921e-10	-8.86088e-11	-3.847e-10	-1.47078e-09
		0.00748	-1.26673e-10	-8.79848e-11	-3.85324e-10	-1.47016e-09
		0.0075	-1.28545e-10	-8.98568e-11	-3.85948e-10	-1.47016e-09
		0.00752	-1.31041e-10	-9.11049e-11	-3.85636e-10	-1.46953e-09
		0.00754	-1.31665e-10	-9.11049e-11	-3.85012e-10	-1.47141e-09
		0.00756	-1.32289e-10	-9.42249e-11	-3.84076e-10	-1.47265e-09
		0.00758	-1.34161e-10	-9.54729e-11	-3.82516e-10	-1.47328e-09
		0.0076	-1.32913e-10	-9.48489e-11	-3.8158e-10	-1.47328e-09
		0.00762	-1.32289e-10	-9.54729e-11	-3.82204e-10	-1.47141e-09
		0.00764	-1.31041e-10	-9.54729e-11	-3.82828e-10	-1.47141e-09
		0.00766	-1.29793e-10	-9.48489e-11	-3.85324e-10	-1.47016e-09
		0.00768	-1.27921e-10	-9.23529e-11	-3.86572e-10	-1.46891e-09
		0.0077	-1.27297e-10	-9.23529e-11	-3.87508e-10	-1.46891e-09
		0.00772	-1.26049e-10	-9.17289e-11	-3.88444e-10	-1.47016e-09
		0.00774	-1.26673e-10	-9.17289e-11	-3.88756e-10	-1.47203e-09
		0.00776	-1.27297e-10	-8.92328e-11	-3.88132e-10	-1.47265e-09
		0.00778	-1.27297e-10	-8.98568e-11	-3.8782e-10	-1.47515e-09
		0.0078	-1.30417e-10	-8.92328e-11	-3.87508e-10	-1.47702e-09
		0.00782	-1.30417e-10	-8.79848e-11	-3.88756e-10	-1.47827e-09
		0.00784	-1.31041e-10	-8.92328e-11	-3.89068e-10	-1.48014e-09
		0.00786	-1.29169e-10	-8.98568e-11	-3.89692e-10	-1.48139e-09
		0.00788	-1.27297e-10	-9.04808e-11	-3.90316e-10	-1.48264e-09
		0.0079	-1.26673e-10	-9.11049e-11	-3.90004e-10	-1.48326e-09
		0.00792	-1.27297e-10	-9.11049e-11	-3.89692e-10	-1.48513e-09
		0.00794	-1.27297e-10	-9.04808e-11	-3.8938e-10	-1.49137e-09
		0.00796	-1.27921e-10	-9.17289e-11	-3.89692e-10	-1.49574e-09
		0.00798	-1.28545e-10	-9.17289e-11	-3.89692e-10	-1.49949e-09
		0.008	-1.27297e-10	-9.17289e-11	-3.90628e-10	-1.5051e-09
		0.00802	-1.30417e-10	-9.29769e-11	-3.91564e-10	-1.51009e-09
		0.00804	-1.31665e-10	-9.29769e-11	-3.93124e-10	-1.51197e-09
		0.00806	-1.34785e-10	-9.48489e-11	-3.92812e-10	-1.50885e-09
		0.00808	-1.36657e-10	-9.42249e-11	-3.92188e-10	-1.50635e-09
		0.0081	-1.37281e-10	-9.60969e-11	-3.91876e-10	-1.50448e-09
		0.00812	-1.38529e-10	-9.60969e-11	-3.9094e-10	-1.50136e-09
		0.00814	-1.39153e-10	-9.73449e-11	-3.90004e-10	-1.50011e-09
		0.00816	-1.36657e-10	-9.73449e-11	-3.90004e-10	-1.49824e-09
		0.00818	-1.36033e-10	-9.67209e-11	-3.89692e-10	-1.49637e-09
		0.0082	-1.36033e-10	-9.60969e-11	-3.8938e-10	-1.49449e-09
		0.00822	-1.35409e-10	-9.48489e-11	-3.88444e-10	-1.4895e-09
		0.00824	-1.34785e-10	-9.48489e-11	-3.88444e-10	-1.48576e-09
		0.00826	-1.35409e-10	-9.48489e-11	-3.8782e-10	-1.48389e-09
		0.00828	-1.35409e-10	-9.60969e-11	-3.88756e-10	-1.48201e-09
		0.0083	-1.34161e-10	-9.67209e-11	-3.90316e-10	-1.48264e-09
		0.00832	-1.32289e-10	-9.73449e-11	-3.90628e-10	-1.48201e-09
		0.00834	-1.32913e-10	-9.73449e-11	-3.91876e-10	-1.48201e-09
		0.00836	-1.30417e-10	-9.79689e-11	-3.91876e-10	-1.48201e-09
		0.00838	-1.30417e-10	-9.54729e-11	-3.925e-10	-1.48201e-09
		0.0084	-1.31041e-10	-9.48489e-11	-3.92188e-10	-1.48014e-09
		0.00842	-1.32913e-10	-9.54729e-11	-3.90628e-10	-1.47952e-09
		0.00844	-1.32913e-10	-9.42249e-11	-3.89068e-10	-1.48077e-09
		0.00846	-1.32289e-10	-9.36009e-11	-3.88132e-10	-1.48077e-09
		0.00848	-1.32913e-10	-9.48489e-11	-3.8782e-10	-1.48139e-09
		0.0085	-1.31665e-10	-9.73449e-11	-3.88756e-10	-1.48264e-09
		0.00852	-1.31041e-10	-9.79689e-11	-3.88756e-10	-1.48139e-09
		0.00854	-1.30417e-10	-9.85929e-11	-3.90316e-10	-1.48264e-09
		0.00856	-1.31041e-10	-9.85929e-11	-3.9094e-10	-1.48451e-09
		0.00858	-1.35409e-10	-9.98409e-11	-3.91564e-10	-1.48326e-09
		0.0086	-1.36657e-10	-9.85929e-11	-3.91564e-10	-1.48451e-09
		0.00862	-1.36033e-10	-9.85929e-11	-3.90628e-10	-1.48264e-09
		0.00864	-1.35409e-10	-9.92169e-11	-3.91564e-10	-1.48389e-09
		0.00866	-1.32913e-10	-9.73449e-11	-3.91876e-10	-1.48451e-09
		0.00868	-1.34161e-10	-9.79689e-11	-3.91876e-10	-1.48389e-09
		0.0087	-1.35409e-10	-9.79689e-11	-3.9094e-10	-1.48389e-09
		0.00872	-1.36033e-10	-9.73449e-11	-3.89692e-10	-1.48077e-09
		0.00874	-1.36657e-10	-9.60969e-11	-3.88756e-10	-1.48139e-09
		0.00876	-1.37281e-10	-9.79689e-11	-3.8782e-10	-1.47952e-09
		0.00878	-1.36657e-10	-9.92169e-11	-3.87196e-10	-1.47952e-09
		0.0088	-1.34785e-10	-9.98409e-11	-3.86884e-10	-1.48014e-09
		0.00882	-1.33537e-10	-9.92169e-11	-3.86884e-10	-1.48139e-09
		0.00884	-1.34161e-10	-9.92169e-11	-3.86884e-10	-1.48264e-09
		0.00886	-1.32289e-10	-9.85929e-11	-3.87196e-10	-1.48389e-09
		0.00888	-1.32913e-10	-9.85929e-11	-3.8782e-10	-1.48326e-09
		0.0089	-1.35409e-10	-9.67209e-11	-3.88132e-10	-1.48264e-09
		0.00892	-1.35409e-10	-9.73449e-11	-3.8782e-10	-1.48264e-09
		0.00894	-1.36033e-10	-9.79689e-11	-3.87508e-10	-1.48077e-09
		0.00896	-1.34785e-10	-9.79689e-11	-3.8782e-10	-1.48014e-09
		0.00898	-1.34161e-10	-1.01089e-10	-3.87508e-10	-1.47952e-09
		0.009	-1.33537e-10	-1.01713e-10	-3.88756e-10	-1.48014e-09
		0.00902	-1.34161e-10	-1.02961e-10	-3.8938e-10	-1.47827e-09
		0.00904	-1.34161e-10	-1.02337e-10	-3.89692e-10	-1.47889e-09
		0.00906	-1.34785e-10	-1.01089e-10	-3.90316e-10	-1.48014e-09
		0.00908	-1.37905e-10	-9.92169e-11	-3.90316e-10	-1.48201e-09
		0.0091	-1.40401e-10	-9.98409e-11	-3.90628e-10	-1.48389e-09
		0.00912	-1.41025e-10	-9.98409e-11	-3.90316e-10	-1.48513e-09
		0.00914	-1.42273e-10	-9.73449e-11	-3.91252e-10	-1.48576e-09
		0.00916	-1.42897e-10	-9.98409e-11	-3.91564e-10	-1.48763e-09
		0.00918	-1.39777e-10	-9.92169e-11	-3.91876e-10	-1.48763e-09
		0.0092	-1.37905e-10	-9.92169e-11	-3.92188e-10	-1.48825e-09
		0.00922	-1.36033e-10	-1.01089e-10	-3.925e-10	-1.48701e-09
		0.00924	-1.34161e-10	-1.01089e-10	-3.91876e-10	-1.48451e-09
		0.00926	-1.35409e-10	-1.02337e-10	-3.91564e-10	-1.48264e-09
		0.00928	-1.35409e-10	-1.04209e-10	-3.90316e-10	-1.48264e-09
		0.0093	-1.35409e-10	-1.03585e-10	-3.90316e-10	-1.48201e-09
		0.00932	-1.36033e-10	-1.04209e-10	-3.8938e-10	-1.48201e-09
		0.00934	-1.36033e-10	-1.03585e-10	-3.89692e-10	-1.48264e-09
		0.00936	-1.35409e-10	-1.01713e-10	-3.88756e-10	-1.48326e-09
		0.00938	-1.34161e-10	-1.00465e-10	-3.88132e-10	-1.48576e-09
		0.0094	-1.34785e-10	-9.92169e-11	-3.8782e-10	-1.48389e-09
		0.00942	-1.34785e-10	-9.98409e-11	-3.8782e-10	-1.48264e-09
		0.00944	-1.34161e-10	-1.01089e-10	-3.88444e-10	-1.48139e-09
		0.00946	-1.34785e-10	-1.00465e-10	-3.89692e-10	-1.47827e-09
		0.00948	-1.36033e-10	-1.01089e-10	-3.91564e-10	-1.47765e-09
		0.0095	-1.35409e-10	-1.00465e-10	-3.9094e-10	-1.47702e-09
		0.00952	-1.34785e-10	-9.85929e-11	-3.925e-10	-1.47515e-09
		0.00954	-1.36033e-10	-9.92169e-11	-3.92188e-10	-1.47702e-09
		0.00956	-1.35409e-10	-9.92169e-11	-3.90004e-10	-1.47827e-09
		0.00958	-1.38529e-10	-1.01713e-10	-3.89068e-10	-1.47827e-09
		0.0096	-1.38529e-10	-1.01713e-10	-3.87196e-10	-1.47889e-09
		0.00962	-1.39153e-10	-1.04209e-10	-3.87196e-10	-1.47952e-09
		0.00964	-1.37281e-10	-1.05457e-10	-3.86572e-10	-1.48014e-09
		0.00966	-1.36657e-10	-1.06081e-10	-3.87508e-10	-1.48139e-09
		0.00968	-1.35409e-10	-1.05457e-10	-3.90004e-10	-1.48139e-09
		0.0097	-1.34161e-10	-1.04833e-10	-3.92188e-10	-1.48389e-09
		0.00972	-1.31665e-10	-1.05457e-10	-3.93124e-10	-1.48389e-09
		0.00974	-1.32913e-10	-1.03585e-10	-3.93748e-10	-1.48451e-09
		0.00976	-1.34785e-10	-1.04833e-10	-3.93436e-10	-1.48451e-09
		0.00978	-1.36033e-10	-1.06081e-10	-3.93436e-10	-1.48326e-09
		0.0098	-1.36657e-10	-1.04833e-10	-3.925e-10	-1.48201e-09
		0.00982	-1.40401e-10	-1.05457e-10	-3.92812e-10	-1.48326e-09
		0.00984	-1.41025e-10	-1.06081e-10	-3.91876e-10	-1.48264e-09
		0.00986	-1.39153e-10	-1.04833e-10	-3.89692e-10	-1.48326e-09
		0.00988	-1.39153e-10	-1.04833e-10	-3.88444e-10	-1.48264e-09
		0.0099	-1.37905e-10	-1.03585e-10	-3.87508e-10	-1.48513e-09
		0.00992	-1.38529e-10	-1.02337e-10	-3.87196e-10	-1.48513e-09
		0.00994	-1.39153e-10	-1.04209e-10	-3.8782e-10	-1.48576e-09
		0.00996	-1.38529e-10	-1.03585e-10	-3.89068e-10	-1.48576e-09
		0.00998	-1.38529e-10	-1.02337e-10	-3.91876e-10	-1.48638e-09
		0.01	-1.36033e-10	-1.04209e-10	-3.94996e-10	-1.48825e-09
		0.01002	-1.34785e-10	-1.04209e-10	-3.9718e-10	-1.48701e-09
		0.01004	-1.35409e-10	-1.04209e-10	-3.97492e-10	-1.48701e-09
		0.01006	-1.36657e-10	-1.04833e-10	-3.96556e-10	-1.48701e-09
		0.01008	-1.36657e-10	-1.04833e-10	-3.94996e-10	-1.48701e-09
		0.0101	-1.37281e-10	-1.04209e-10	-3.94684e-10	-1.48451e-09
		0.01012	-1.39777e-10	-1.02961e-10	-3.93124e-10	-1.48513e-09
		0.01014	-1.39777e-10	-1.03585e-10	-3.925e-10	-1.48389e-09
		0.01016	-1.37905e-10	-1.01713e-10	-3.92188e-10	-1.48576e-09
		0.01018	-1.38529e-10	-1.00465e-10	-3.92188e-10	-1.48576e-09
		0.0102	-1.38529e-10	-1.00465e-10	-3.91876e-10	-1.48451e-09
		0.01022	-1.38529e-10	-9.73449e-11	-3.91876e-10	-1.48451e-09
		0.01024	-1.36657e-10	-9.92169e-11	-3.92812e-10	-1.48201e-09
		0.01026	-1.37905e-10	-1.00465e-10	-3.925e-10	-1.48014e-09
		0.01028	-1.36033e-10	-1.01089e-10	-3.925e-10	-1.47827e-09
		0.0103	-1.36033e-10	-1.02961e-10	-3.93436e-10	-1.47702e-09
		0.01032	-1.35409e-10	-1.03585e-10	-3.93436e-10	-1.47889e-09
		0.01034	-1.34785e-10	-1.04209e-10	-3.94684e-10	-1.48077e-09
		0.01036	-1.32913e-10	-1.05457e-10	-3.94996e-10	-1.48326e-09
		0.01038	-1.31665e-10	-1.06081e-10	-3.94372e-10	-1.48264e-09
		0.0104	-1.32289e-10	-1.05457e-10	-3.93436e-10	-1.48451e-09
		0.01042	-1.31665e-10	-1.06081e-10	-3.91252e-10	-1.48451e-09
		0.01044	-1.32289e-10	-1.04833e-10	-3.89692e-10	-1.48264e-09
		0.01046	-1.34161e-10	-1.06081e-10	-3.88132e-10	-1.48264e-09
		0.01048	-1.35409e-10	-1.07953e-10	-3.88444e-10	-1.48326e-09
		0.0105	-1.34785e-10	-1.06705e-10	-3.88444e-10	-1.48451e-09
		0.01052	-1.32289e-10	-1.06705e-10	-3.88756e-10	-1.48513e-09
		0.01054	-1.30417e-10	-1.04833e-10	-3.8938e-10	-1.48576e-09
		0.01056	-1.29793e-10	-1.04209e-10	-3.88756e-10	-1.48638e-09
		0.01058	-1.29169e-10	-1.02337e-10	-3.87508e-10	-1.48638e-09
		0.0106	-1.28545e-10	-1.02337e-10	-3.85948e-10	-1.48576e-09
		0.01062	-1.31041e-10	-1.01713e-10	-3.85636e-10	-1.48389e-09
		0.01064	-1.31041e-10	-1.04209e-10	-3.86572e-10	-1.48451e-09
		0.01066	-1.30417e-10	-1.04209e-10	-3.88756e-10	-1.48451e-09
		0.01068	-1.32289e-10	-1.06705e-10	-3.89692e-10	-1.48513e-09
		0.0107	-1.33537e-10	-1.07953e-10	-3.91564e-10	-1.48513e-09
		0.01072	-1.32913e-10	-1.06081e-10	-3.925e-10	-1.48451e-09
		0.01074	-1.33537e-10	-1.07329e-10	-3.93124e-10	-1.48451e-09
		0.01076	-1.35409e-10	-1.06705e-10	-3.925e-10	-1.48389e-09
		0.01078	-1.36033e-10	-1.05457e-10	-3.91252e-10	-1.48326e-09
		0.0108	-1.37905e-10	-1.05457e-10	-3.90004e-10	-1.48264e-09
		0.01082	-1.39777e-10	-1.05457e-10	-3.89692e-10	-1.48389e-09
		0.01084	-1.38529e-10	-1.03585e-10	-3.89068e-10	-1.48638e-09
		0.01086	-1.38529e-10	-1.01713e-10	-3.90628e-10	-1.48701e-09
		0.01088	-1.37905e-10	-1.01713e-10	-3.9094e-10	-1.48701e-09
		0.0109	-1.38529e-10	-9.92169e-11	-3.9094e-10	-1.48701e-09
		0.01092	-1.39777e-10	-1.00465e-10	-3.91876e-10	-1.48763e-09
		0.01094	-1.39777e-10	-9.98409e-11	-3.91564e-10	-1.48763e-09
		0.01096	-1.39153e-10	-9.98409e-11	-3.91564e-10	-1.48825e-09
		0.01098	-1.36657e-10	-1.01713e-10	-3.91252e-10	-1.48763e-09
		0.011	-1.36657e-10	-1.02337e-10	-3.91252e-10	-1.48888e-09
		0.01102	-1.33537e-10	-1.04833e-10	-3.91252e-10	-1.48825e-09
		0.01104	-1.33537e-10	-1.05457e-10	-3.90004e-10	-1.48701e-09
		0.01106	-1.32289e-10	-1.07953e-10	-3.8938e-10	-1.48638e-09
		0.01108	-1.34161e-10	-1.07953e-10	-3.8938e-10	-1.48389e-09
		0.0111	-1.35409e-10	-1.07953e-10	-3.88444e-10	-1.48451e-09
		0.01112	-1.33537e-10	-1.07329e-10	-3.88756e-10	-1.48389e-09
		0.01114	-1.34161e-10	-1.07953e-10	-3.90316e-10	-1.48638e-09
		0.01116	-1.32913e-10	-1.04209e-10	-3.91564e-10	-1.48701e-09
		0.01118	-1.32913e-10	-1.01713e-10	-3.93436e-10	-1.48888e-09
		0.0112	-1.33537e-10	-9.85929e-11	-3.93748e-10	-1.49075e-09
		0.01122	-1.31665e-10	-9.73449e-11	-3.9406e-10	-1.49075e-09
		0.01124	-1.32913e-10	-9.73449e-11	-3.9406e-10	-1.49137e-09
		0.01126	-1.34785e-10	-9.98409e-11	-3.93748e-10	-1.492e-09
		0.01128	-1.34785e-10	-9.85929e-11	-3.92812e-10	-1.49013e-09
		0.0113	-1.35409e-10	-9.98409e-11	-3.91564e-10	-1.49013e-09
		0.01132	-1.35409e-10	-1.02961e-10	-3.90316e-10	-1.48763e-09
		0.01134	-1.35409e-10	-1.04833e-10	-3.90628e-10	-1.48638e-09
		0.01136	-1.36657e-10	-1.06705e-10	-3.90628e-10	-1.48701e-09
		0.01138	-1.35409e-10	-1.07953e-10	-3.9094e-10	-1.48576e-09
		0.0114	-1.36657e-10	-1.09201e-10	-3.91564e-10	-1.48701e-09
		0.01142	-1.36657e-10	-1.08577e-10	-3.92812e-10	-1.48701e-09
		0.01144	-1.37905e-10	-1.09825e-10	-3.93124e-10	-1.48576e-09
		0.01146	-1.38529e-10	-1.08577e-10	-3.93748e-10	-1.48576e-09
		0.01148	-1.38529e-10	-1.07329e-10	-3.94684e-10	-1.48451e-09
		0.0115	-1.37281e-10	-1.05457e-10	-3.94996e-10	-1.48576e-09
		0.01152	-1.38529e-10	-1.04209e-10	-3.93748e-10	-1.48763e-09
		0.01154	-1.36657e-10	-1.02961e-10	-3.92188e-10	-1.48825e-09
		0.01156	-1.37905e-10	-1.02337e-10	-3.9094e-10	-1.48888e-09
		0.01158	-1.38529e-10	-1.03585e-10	-3.90004e-10	-1.49013e-09
		0.0116	-1.38529e-10	-1.02337e-10	-3.90004e-10	-1.48825e-09
		0.01162	-1.37905e-10	-1.03585e-10	-3.8938e-10	-1.48513e-09
		0.01164	-1.37281e-10	-1.04209e-10	-3.90628e-10	-1.48513e-09
		0.01166	-1.34785e-10	-1.01089e-10	-3.9094e-10	-1.48326e-09
		0.01168	-1.34161e-10	-1.02337e-10	-3.9094e-10	-1.48326e-09
		0.0117	-1.34161e-10	-1.00465e-10	-3.91252e-10	-1.48576e-09
		0.01172	-1.34161e-10	-1.01713e-10	-3.91564e-10	-1.48638e-09
		0.01174	-1.36033e-10	-1.03585e-10	-3.91876e-10	-1.48763e-09
		0.01176	-1.36033e-10	-1.04209e-10	-3.91564e-10	-1.4895e-09
		0.01178	-1.35409e-10	-1.04209e-10	-3.9094e-10	-1.48825e-09
		0.0118	-1.36033e-10	-1.06081e-10	-3.90628e-10	-1.48825e-09
		0.01182	-1.35409e-10	-1.06705e-10	-3.90004e-10	-1.48701e-09
		0.01184	-1.36033e-10	-1.05457e-10	-3.90316e-10	-1.48451e-09
		0.01186	-1.34785e-10	-1.04833e-10	-3.91252e-10	-1.48451e-09
		0.01188	-1.35409e-10	-1.05457e-10	-3.925e-10	-1.48389e-09
		0.0119	-1.36657e-10	-1.02961e-10	-3.925e-10	-1.48264e-09
		0.01192	-1.37281e-10	-1.03585e-10	-3.93748e-10	-1.48264e-09
		0.01194	-1.38529e-10	-1.03585e-10	-3.93748e-10	-1.48201e-09
		0.01196	-1.39153e-10	-1.05457e-10	-3.93124e-10	-1.48326e-09
		0.01198	-1.39777e-10	-1.07329e-10	-3.93124e-10	-1.48451e-09
		0.012	-1.40401e-10	-1.06705e-10	-3.925e-10	-1.48451e-09
		0.01202	-1.37905e-10	-1.06081e-10	-3.91876e-10	-1.48638e-09
		0.01204	-1.38529e-10	-1.04833e-10	-3.92188e-10	-1.48825e-09
		0.01206	-1.37281e-10	-1.03585e-10	-3.92812e-10	-1.48825e-09
		0.01208	-1.37905e-10	-1.02961e-10	-3.93748e-10	-1.48825e-09
		0.0121	-1.39153e-10	-1.02337e-10	-3.94684e-10	-1.48825e-09
		0.01212	-1.41025e-10	-1.02961e-10	-3.94996e-10	-1.48825e-09
		0.01214	-1.41649e-10	-1.02961e-10	-3.9562e-10	-1.48825e-09
		0.01216	-1.42897e-10	-1.04209e-10	-3.95308e-10	-1.48825e-09
		0.01218	-1.41025e-10	-1.05457e-10	-3.94684e-10	-1.48701e-09
		0.0122	-1.38529e-10	-1.05457e-10	-3.925e-10	-1.48701e-09
		0.01222	-1.39777e-10	-1.06081e-10	-3.9094e-10	-1.48576e-09
		0.01224	-1.39777e-10	-1.07329e-10	-3.8938e-10	-1.48576e-09
		0.01226	-1.39777e-10	-1.04833e-10	-3.8782e-10	-1.48576e-09
		0.01228	-1.39153e-10	-1.05457e-10	-3.89692e-10	-1.48701e-09
		0.0123	-1.37905e-10	-1.04833e-10	-3.91252e-10	-1.48888e-09
		0.01232	-1.37281e-10	-1.04833e-10	-3.93124e-10	-1.4895e-09
		0.01234	-1.37281e-10	-1.05457e-10	-3.94684e-10	-1.492e-09
		0.01236	-1.36033e-10	-1.04833e-10	-3.94684e-10	-1.49262e-09
		0.01238	-1.34161e-10	-1.04209e-10	-3.94996e-10	-1.49262e-09
		0.0124	-1.34785e-10	-1.04833e-10	-3.94996e-10	-1.49262e-09
		0.01242	-1.34785e-10	-1.02961e-10	-3.94684e-10	-1.49137e-09
		0.01244	-1.34785e-10	-1.04209e-10	-3.94996e-10	-1.49013e-09
		0.01246	-1.35409e-10	-1.03585e-10	-3.9406e-10	-1.4895e-09
		0.01248	-1.36657e-10	-1.05457e-10	-3.94996e-10	-1.4895e-09
		0.0125	-1.35409e-10	-1.06705e-10	-3.95308e-10	-1.4895e-09
		0.01252	-1.35409e-10	-1.06081e-10	-3.94684e-10	-1.4895e-09
		0.01254	-1.35409e-10	-1.06081e-10	-3.94684e-10	-1.48825e-09
		0.01256	-1.37905e-10	-1.04209e-10	-3.93436e-10	-1.48763e-09
		0.01258	-1.39153e-10	-1.04209e-10	-3.93124e-10	-1.48825e-09
		0.0126	-1.41025e-10	-1.03585e-10	-3.92812e-10	-1.48638e-09
		0.01262	-1.42273e-10	-1.04209e-10	-3.91876e-10	-1.48701e-09
		0.01264	-1.42897e-10	-1.04833e-10	-3.92188e-10	-1.48638e-09
		0.01266	-1.42273e-10	-1.04209e-10	-3.91252e-10	-1.48825e-09
		0.01268	-1.41025e-10	-1.04209e-10	-3.91252e-10	-1.4895e-09
		0.0127	-1.38529e-10	-1.04833e-10	-3.90316e-10	-1.492e-09
		0.01272	-1.35409e-10	-1.03585e-10	-3.90628e-10	-1.49449e-09
		0.01274	-1.34785e-10	-1.01713e-10	-3.91564e-10	-1.49387e-09
		0.01276	-1.34161e-10	-1.03585e-10	-3.92188e-10	-1.492e-09
		0.01278	-1.37281e-10	-1.04209e-10	-3.93436e-10	-1.49262e-09
		0.0128	-1.37281e-10	-1.05457e-10	-3.94996e-10	-1.49262e-09
		0.01282	-1.39153e-10	-1.07329e-10	-3.9562e-10	-1.49075e-09
		0.01284	-1.39153e-10	-1.07329e-10	-3.95932e-10	-1.49075e-09
		0.01286	-1.39153e-10	-1.09201e-10	-3.95308e-10	-1.49137e-09
		0.01288	-1.41025e-10	-1.07329e-10	-3.93748e-10	-1.492e-09
		0.0129	-1.38529e-10	-1.09201e-10	-3.92188e-10	-1.49013e-09
		0.01292	-1.39153e-10	-1.09825e-10	-3.91564e-10	-1.49075e-09
		0.01294	-1.41025e-10	-1.09201e-10	-3.90628e-10	-1.4895e-09
		0.01296	-1.41649e-10	-1.08577e-10	-3.90628e-10	-1.49137e-09
		0.01298	-1.40401e-10	-1.07953e-10	-3.90628e-10	-1.48888e-09
		0.013	-1.40401e-10	-1.06081e-10	-3.90004e-10	-1.49013e-09
		0.01302	-1.39153e-10	-1.04209e-10	-3.8938e-10	-1.48888e-09
		0.01304	-1.37905e-10	-1.02961e-10	-3.89068e-10	-1.48888e-09
		0.01306	-1.37905e-10	-1.04209e-10	-3.89692e-10	-1.48763e-09
		0.01308	-1.37281e-10	-1.04209e-10	-3.90628e-10	-1.48825e-09
		0.0131	-1.37281e-10	-1.05457e-10	-3.91252e-10	-1.48888e-09
		0.01312	-1.37905e-10	-1.04209e-10	-3.91876e-10	-1.4895e-09
		0.01314	-1.37281e-10	-1.04209e-10	-3.92188e-10	-1.49137e-09
		0.01316	-1.36657e-10	-1.02961e-10	-3.93748e-10	-1.49137e-09
		0.01318	-1.36657e-10	-1.02337e-10	-3.94996e-10	-1.49262e-09
		0.0132	-1.38529e-10	-1.02961e-10	-3.94996e-10	-1.49387e-09
		0.01322	-1.39153e-10	-1.01713e-10	-3.9562e-10	-1.49512e-09
		0.01324	-1.41649e-10	-1.04209e-10	-3.94996e-10	-1.49387e-09
		0.01326	-1.41025e-10	-1.04209e-10	-3.93748e-10	-1.49325e-09
		0.01328	-1.42273e-10	-1.03585e-10	-3.925e-10	-1.49387e-09
		0.0133	-1.41025e-10	-1.05457e-10	-3.91564e-10	-1.49387e-09
		0.01332	-1.41649e-10	-1.04833e-10	-3.92188e-10	-1.49387e-09
		0.01334	-1.41025e-10	-1.06081e-10	-3.925e-10	-1.49325e-09
		0.01336	-1.38529e-10	-1.05457e-10	-3.92812e-10	-1.49325e-09
		0.01338	-1.37281e-10	-1.06081e-10	-3.92812e-10	-1.49325e-09
		0.0134	-1.36657e-10	-1.05457e-10	-3.925e-10	-1.49387e-09
		0.01342	-1.35409e-10	-1.04833e-10	-3.91564e-10	-1.49512e-09
		0.01344	-1.36033e-10	-1.05457e-10	-3.91564e-10	-1.49824e-09
		0.01346	-1.35409e-10	-1.06081e-10	-3.9094e-10	-1.50011e-09
		0.01348	-1.36033e-10	-1.07329e-10	-3.90628e-10	-1.50385e-09
		0.0135	-1.36657e-10	-1.05457e-10	-3.91876e-10	-1.50573e-09
		0.01352	-1.37281e-10	-1.04209e-10	-3.925e-10	-1.51134e-09
		0.01354	-1.36657e-10	-1.03585e-10	-3.92812e-10	-1.51571e-09
		0.01356	-1.36657e-10	-1.01713e-10	-3.93436e-10	-1.51696e-09
		0.01358	-1.35409e-10	-1.00465e-10	-3.93748e-10	-1.51945e-09
		0.0136	-1.35409e-10	-9.98409e-11	-3.94372e-10	-1.52008e-09
		0.01362	-1.35409e-10	-1.00465e-10	-3.94684e-10	-1.52008e-09
		0.01364	-1.34785e-10	-1.01089e-10	-3.94684e-10	-1.51758e-09
		0.01366	-1.34785e-10	-1.02337e-10	-3.9406e-10	-1.51571e-09
		0.01368	-1.35409e-10	-9.98409e-11	-3.93748e-10	-1.51509e-09
		0.0137	-1.36033e-10	-1.00465e-10	-3.93436e-10	-1.51134e-09
		0.01372	-1.34785e-10	-9.98409e-11	-3.93436e-10	-1.51009e-09
		0.01374	-1.36033e-10	-1.01713e-10	-3.93748e-10	-1.50822e-09
		0.01376	-1.37281e-10	-1.02337e-10	-3.94372e-10	-1.5076e-09
		0.01378	-1.38529e-10	-1.04209e-10	-3.9406e-10	-1.5076e-09
		0.0138	-1.39777e-10	-1.04833e-10	-3.93748e-10	-1.5076e-09
		0.01382	-1.39153e-10	-1.06081e-10	-3.93124e-10	-1.50635e-09
		0.01384	-1.39153e-10	-1.06081e-10	-3.92812e-10	-1.50573e-09
		0.01386	-1.37905e-10	-1.06705e-10	-3.925e-10	-1.50635e-09
		0.01388	-1.37281e-10	-1.07329e-10	-3.92812e-10	-1.50385e-09
		0.0139	-1.35409e-10	-1.05457e-10	-3.92188e-10	-1.50136e-09
		0.01392	-1.34785e-10	-1.06081e-10	-3.92188e-10	-1.50073e-09
		0.01394	-1.35409e-10	-1.04833e-10	-3.91876e-10	-1.49824e-09
		0.01396	-1.34785e-10	-1.04833e-10	-3.92188e-10	-1.49949e-09
		0.01398	-1.36657e-10	-1.06081e-10	-3.92812e-10	-1.49824e-09
		0.014	-1.37281e-10	-1.05457e-10	-3.9406e-10	-1.49949e-09
		0.01402	-1.37905e-10	-1.06081e-10	-3.9562e-10	-1.50011e-09
		0.01404	-1.39153e-10	-1.07953e-10	-3.96244e-10	-1.50073e-09
		0.01406	-1.40401e-10	-1.08577e-10	-3.9562e-10	-1.50011e-09
		0.01408	-1.40401e-10	-1.09825e-10	-3.94996e-10	-1.49824e-09
		0.0141	-1.40401e-10	-1.09825e-10	-3.94684e-10	-1.49824e-09
		0.01412	-1.40401e-10	-1.09201e-10	-3.94684e-10	-1.49637e-09
		0.01414	-1.41025e-10	-1.09825e-10	-3.94684e-10	-1.49637e-09
		0.01416	-1.39777e-10	-1.09201e-10	-3.9562e-10	-1.49387e-09
		0.01418	-1.37281e-10	-1.06081e-10	-3.96868e-10	-1.49512e-09
		0.0142	-1.34785e-10	-1.03585e-10	-3.97492e-10	-1.49574e-09
		0.01422	-1.32289e-10	-1.04209e-10	-3.9718e-10	-1.49512e-09
		0.01424	-1.34161e-10	-1.02337e-10	-3.9718e-10	-1.49824e-09
		0.01426	-1.36033e-10	-1.04209e-10	-3.96868e-10	-1.49824e-09
		0.01428	-1.34785e-10	-1.02961e-10	-3.96556e-10	-1.49637e-09
		0.0143	-1.38529e-10	-1.04209e-10	-3.96868e-10	-1.49637e-09
		0.01432	-1.37281e-10	-1.02337e-10	-3.96556e-10	-1.49387e-09
		0.01434	-1.36657e-10	-1.02337e-10	-3.98116e-10	-1.49325e-09
		0.01436	-1.36033e-10	-1.05457e-10	-3.98116e-10	-1.492e-09
		0.01438	-1.36033e-10	-1.04209e-10	-3.99052e-10	-1.49325e-09
		0.0144	-1.34785e-10	-1.04209e-10	-3.98428e-10	-1.49325e-09
		0.01442	-1.36657e-10	-1.04209e-10	-3.97492e-10	-1.49262e-09
		0.01444	-1.37905e-10	-1.04209e-10	-3.9718e-10	-1.49262e-09
		0.01446	-1.37281e-10	-1.04833e-10	-3.95932e-10	-1.49325e-09
		0.01448	-1.37281e-10	-1.06081e-10	-3.95308e-10	-1.49449e-09
		0.0145	-1.36657e-10	-1.06705e-10	-3.94996e-10	-1.49574e-09
		0.01452	-1.37905e-10	-1.07329e-10	-3.9562e-10	-1.49512e-09
		0.01454	-1.36657e-10	-1.07329e-10	-3.95308e-10	-1.49699e-09
		0.01456	-1.39153e-10	-1.08577e-10	-3.9562e-10	-1.49761e-09
		0.01458	-1.39153e-10	-1.09201e-10	-3.95932e-10	-1.49761e-09
		0.0146	-1.39153e-10	-1.08577e-10	-3.94684e-10	-1.49699e-09
		0.01462	-1.38529e-10	-1.09201e-10	-3.94684e-10	-1.49574e-09
		0.01464	-1.37905e-10	-1.07953e-10	-3.9562e-10	-1.49512e-09
		0.01466	-1.36657e-10	-1.06705e-10	-3.95308e-10	-1.49512e-09
		0.01468	-1.35409e-10	-1.04833e-10	-3.95308e-10	-1.49512e-09
		0.0147	-1.34785e-10	-1.04209e-10	-3.94684e-10	-1.49449e-09
		0.01472	-1.34785e-10	-1.02337e-10	-3.93748e-10	-1.49449e-09
		0.01474	-1.34161e-10	-1.02961e-10	-3.93124e-10	-1.49637e-09
		0.01476	-1.37281e-10	-1.03585e-10	-3.93124e-10	-1.49637e-09
		0.01478	-1.37905e-10	-1.05457e-10	-3.93748e-10	-1.49699e-09
		0.0148	-1.40401e-10	-1.05457e-10	-3.94684e-10	-1.49699e-09
		0.01482	-1.40401e-10	-1.06081e-10	-3.95932e-10	-1.49387e-09
		0.01484	-1.37905e-10	-1.06705e-10	-3.9562e-10	-1.49262e-09
		0.01486	-1.36657e-10	-1.05457e-10	-3.96244e-10	-1.492e-09
		0.01488	-1.36657e-10	-1.04833e-10	-3.95932e-10	-1.49075e-09
		0.0149	-1.33537e-10	-1.06081e-10	-3.95308e-10	-1.492e-09
		0.01492	-1.33537e-10	-1.05457e-10	-3.94684e-10	-1.492e-09
		0.01494	-1.33537e-10	-1.06705e-10	-3.94996e-10	-1.49387e-09
		0.01496	-1.34161e-10	-1.06081e-10	-3.94684e-10	-1.49449e-09
		0.01498	-1.34785e-10	-1.06705e-10	-3.95308e-10	-1.49387e-09
		0.015	-1.36033e-10	-1.05457e-10	-3.94996e-10	-1.49325e-09
		0.01502	-1.34785e-10	-1.04833e-10	-3.9562e-10	-1.49137e-09
		0.01504	-1.34785e-10	-1.02961e-10	-3.95308e-10	-1.49262e-09
		0.01506	-1.36033e-10	-1.01713e-10	-3.94684e-10	-1.49075e-09
		0.01508	-1.37281e-10	-1.03585e-10	-3.94684e-10	-1.492e-09
		0.0151	-1.37281e-10	-1.02961e-10	-3.9406e-10	-1.49137e-09
		0.01512	-1.38529e-10	-1.03585e-10	-3.94372e-10	-1.49262e-09
		0.01514	-1.38529e-10	-1.06705e-10	-3.93748e-10	-1.49325e-09
		0.01516	-1.39153e-10	-1.07329e-10	-3.93748e-10	-1.49262e-09
		0.01518	-1.41025e-10	-1.06705e-10	-3.93124e-10	-1.49262e-09
		0.0152	-1.39777e-10	-1.06705e-10	-3.9406e-10	-1.49325e-09
		0.01522	-1.41649e-10	-1.07329e-10	-3.94996e-10	-1.49574e-09
		0.01524	-1.42897e-10	-1.07953e-10	-3.9562e-10	-1.49512e-09
		0.01526	-1.41025e-10	-1.07953e-10	-3.95308e-10	-1.49637e-09
		0.01528	-1.42273e-10	-1.07329e-10	-3.94684e-10	-1.49637e-09
		0.0153	-1.41649e-10	-1.07329e-10	-3.9406e-10	-1.49637e-09
		0.01532	-1.41025e-10	-1.07329e-10	-3.91876e-10	-1.49574e-09
		0.01534	-1.42897e-10	-1.07329e-10	-3.92188e-10	-1.49262e-09
		0.01536	-1.40401e-10	-1.06705e-10	-3.925e-10	-1.49325e-09
		0.01538	-1.39777e-10	-1.07953e-10	-3.92188e-10	-1.49449e-09
		0.0154	-1.38529e-10	-1.07953e-10	-3.91876e-10	-1.49262e-09
		0.01542	-1.37905e-10	-1.08577e-10	-3.91252e-10	-1.49137e-09
		0.01544	-1.37905e-10	-1.07329e-10	-3.91252e-10	-1.49075e-09
		0.01546	-1.37905e-10	-1.05457e-10	-3.90004e-10	-1.49075e-09
		0.01548	-1.36657e-10	-1.02961e-10	-3.90004e-10	-1.49013e-09
		0.0155	-1.36657e-10	-1.03585e-10	-3.90316e-10	-1.49013e-09
		0.01552	-1.36033e-10	-1.01089e-10	-3.90628e-10	-1.48888e-09
		0.01554	-1.34785e-10	-1.00465e-10	-3.91252e-10	-1.48888e-09
		0.01556	-1.35409e-10	-9.79689e-11	-3.90628e-10	-1.48825e-09
		0.01558	-1.36657e-10	-9.79689e-11	-3.90628e-10	-1.48825e-09
		0.0156	-1.35409e-10	-9.85929e-11	-3.90628e-10	-1.48638e-09
		0.01562	-1.36657e-10	-9.92169e-11	-3.9094e-10	-1.48701e-09
		0.01564	-1.37905e-10	-1.01089e-10	-3.90316e-10	-1.48888e-09
		0.01566	-1.34785e-10	-1.03585e-10	-3.90004e-10	-1.4895e-09
		0.01568	-1.35409e-10	-1.04833e-10	-3.90628e-10	-1.49137e-09
		0.0157	-1.35409e-10	-1.04833e-10	-3.91252e-10	-1.48888e-09
		0.01572	-1.35409e-10	-1.06705e-10	-3.92188e-10	-1.4895e-09
		0.01574	-1.34785e-10	-1.05457e-10	-3.92812e-10	-1.49013e-09
		0.01576	-1.34785e-10	-1.05457e-10	-3.9406e-10	-1.492e-09
		0.01578	-1.35409e-10	-1.04209e-10	-3.9562e-10	-1.492e-09
		0.0158	-1.36657e-10	-1.04209e-10	-3.9718e-10	-1.49137e-09
		0.01582	-1.36657e-10	-1.03585e-10	-3.98428e-10	-1.492e-09
		0.01584	-1.35409e-10	-1.02961e-10	-3.98428e-10	-1.49449e-09
		0.01586	-1.35409e-10	-1.02337e-10	-3.98116e-10	-1.49387e-09
		0.01588	-1.36657e-10	-1.02961e-10	-3.98116e-10	-1.49262e-09
		0.0159	-1.36657e-10	-1.03585e-10	-3.96868e-10	-1.49325e-09
		0.01592	-1.37281e-10	-1.02337e-10	-3.9562e-10	-1.492e-09
		0.01594	-1.38529e-10	-1.02961e-10	-3.94996e-10	-1.48888e-09
		0.01596	-1.41025e-10	-1.03585e-10	-3.9406e-10	-1.48825e-09
		0.01598	-1.41025e-10	-1.04833e-10	-3.93748e-10	-1.48513e-09
		0.016	-1.41025e-10	-1.04209e-10	-3.93748e-10	-1.48638e-09
		0.01602	-1.41025e-10	-1.04209e-10	-3.93748e-10	-1.48763e-09
		0.01604	-1.41025e-10	-1.05457e-10	-3.93436e-10	-1.48825e-09
		0.01606	-1.39153e-10	-1.06081e-10	-3.93748e-10	-1.48888e-09
		0.01608	-1.38529e-10	-1.07953e-10	-3.9406e-10	-1.4895e-09
		0.0161	-1.36033e-10	-1.07953e-10	-3.93436e-10	-1.49013e-09
		0.01612	-1.35409e-10	-1.08577e-10	-3.93124e-10	-1.49075e-09
		0.01614	-1.36033e-10	-1.06705e-10	-3.93748e-10	-1.49075e-09
		0.01616	-1.35409e-10	-1.07329e-10	-3.93748e-10	-1.49325e-09
		0.01618	-1.37905e-10	-1.04833e-10	-3.93748e-10	-1.49262e-09
		0.0162	-1.37281e-10	-1.06705e-10	-3.94996e-10	-1.49387e-09
		0.01622	-1.36657e-10	-1.06705e-10	-3.94684e-10	-1.49325e-09
		0.01624	-1.38529e-10	-1.06705e-10	-3.93748e-10	-1.49137e-09
		0.01626	-1.39153e-10	-1.07329e-10	-3.93436e-10	-1.492e-09
		0.01628	-1.41025e-10	-1.09201e-10	-3.925e-10	-1.49137e-09
		0.0163	-1.38529e-10	-1.11073e-10	-3.92812e-10	-1.49075e-09
		0.01632	-1.38529e-10	-1.11697e-10	-3.93436e-10	-1.49013e-09
		0.01634	-1.37905e-10	-1.09825e-10	-3.9406e-10	-1.49137e-09
		0.01636	-1.36033e-10	-1.09201e-10	-3.94684e-10	-1.49262e-09
		0.01638	-1.33537e-10	-1.06705e-10	-3.94372e-10	-1.49262e-09
		0.0164	-1.33537e-10	-1.04833e-10	-3.9406e-10	-1.49512e-09
		0.01642	-1.31665e-10	-1.04833e-10	-3.9406e-10	-1.49761e-09
		0.01644	-1.31041e-10	-1.02337e-10	-3.9406e-10	-1.49699e-09
		0.01646	-1.31665e-10	-1.04209e-10	-3.93748e-10	-1.49449e-09
		0.01648	-1.32913e-10	-1.03585e-10	-3.93436e-10	-1.49574e-09
		0.0165	-1.32289e-10	-1.06081e-10	-3.93436e-10	-1.49325e-09
		0.01652	-1.34161e-10	-1.05457e-10	-3.9406e-10	-1.49262e-09
		0.01654	-1.33537e-10	-1.06081e-10	-3.94996e-10	-1.49013e-09
		0.01656	-1.34785e-10	-1.07329e-10	-3.94996e-10	-1.4895e-09
		0.01658	-1.38529e-10	-1.08577e-10	-3.94372e-10	-1.48888e-09
		0.0166	-1.40401e-10	-1.09201e-10	-3.93748e-10	-1.48888e-09
		0.01662	-1.41025e-10	-1.11073e-10	-3.93124e-10	-1.49013e-09
		0.01664	-1.41025e-10	-1.11697e-10	-3.92812e-10	-1.49137e-09
		0.01666	-1.40401e-10	-1.10449e-10	-3.92812e-10	-1.492e-09
		0.01668	-1.40401e-10	-1.10449e-10	-3.93436e-10	-1.49013e-09
		0.0167	-1.40401e-10	-1.07329e-10	-3.9406e-10	-1.49013e-09
		0.01672	-1.41649e-10	-1.07953e-10	-3.93124e-10	-1.49075e-09
		0.01674	-1.40401e-10	-1.06705e-10	-3.93748e-10	-1.48825e-09
		0.01676	-1.41649e-10	-1.04833e-10	-3.93436e-10	-1.48888e-09
		0.01678	-1.42273e-10	-1.06081e-10	-3.93748e-10	-1.4895e-09
		0.0168	-1.42273e-10	-1.07953e-10	-3.93124e-10	-1.49013e-09
		0.01682	-1.41025e-10	-1.09201e-10	-3.91564e-10	-1.492e-09
		0.01684	-1.40401e-10	-1.09825e-10	-3.90628e-10	-1.49387e-09
		0.01686	-1.39777e-10	-1.09825e-10	-3.91252e-10	-1.49512e-09
		0.01688	-1.38529e-10	-1.11073e-10	-3.925e-10	-1.49637e-09
		0.0169	-1.37905e-10	-1.09825e-10	-3.93436e-10	-1.49387e-09
		0.01692	-1.39153e-10	-1.09201e-10	-3.9562e-10	-1.492e-09
		0.01694	-1.39153e-10	-1.10449e-10	-3.96868e-10	-1.49013e-09
		0.01696	-1.37905e-10	-1.08577e-10	-3.98116e-10	-1.48638e-09
		0.01698	-1.37281e-10	-1.06705e-10	-3.98428e-10	-1.48576e-09
		0.017	-1.34785e-10	-1.06081e-10	-3.98428e-10	-1.48513e-09
		0.01702	-1.33537e-10	-1.06081e-10	-3.97492e-10	-1.48638e-09
		0.01704	-1.33537e-10	-1.06705e-10	-3.94996e-10	-1.48763e-09
		0.01706	-1.32289e-10	-1.04833e-10	-3.93748e-10	-1.49137e-09
		0.01708	-1.32289e-10	-1.05457e-10	-3.92188e-10	-1.49387e-09
		0.0171	-1.34785e-10	-1.05457e-10	-3.91876e-10	-1.49387e-09
		0.01712	-1.36033e-10	-1.06705e-10	-3.91252e-10	-1.49387e-09
		0.01714	-1.36657e-10	-1.06705e-10	-3.91252e-10	-1.49387e-09
		0.01716	-1.36033e-10	-1.06081e-10	-3.9094e-10	-1.49387e-09
		0.01718	-1.36033e-10	-1.06081e-10	-3.92188e-10	-1.49262e-09
		0.0172	-1.36657e-10	-1.04209e-10	-3.92812e-10	-1.49262e-09
		0.01722	-1.36657e-10	-1.02337e-10	-3.92188e-10	-1.492e-09
		0.01724	-1.38529e-10	-1.02337e-10	-3.92188e-10	-1.49075e-09
		0.01726	-1.38529e-10	-1.01713e-10	-3.92188e-10	-1.4895e-09
		0.01728	-1.40401e-10	-1.02961e-10	-3.9094e-10	-1.48888e-09
		0.0173	-1.40401e-10	-1.05457e-10	-3.91564e-10	-1.48763e-09
		0.01732	-1.39777e-10	-1.06081e-10	-3.91564e-10	-1.48701e-09
		0.01734	-1.38529e-10	-1.07329e-10	-3.91876e-10	-1.48638e-09
		0.01736	-1.37281e-10	-1.08577e-10	-3.91876e-10	-1.48701e-09
		0.01738	-1.36657e-10	-1.08577e-10	-3.91876e-10	-1.48638e-09
		0.0174	-1.36033e-10	-1.09201e-10	-3.92188e-10	-1.48638e-09
		0.01742	-1.32913e-10	-1.08577e-10	-3.93436e-10	-1.48763e-09
		0.01744	-1.33537e-10	-1.08577e-10	-3.9406e-10	-1.4895e-09
		0.01746	-1.33537e-10	-1.05457e-10	-3.94372e-10	-1.49075e-09
		0.01748	-1.34161e-10	-1.04833e-10	-3.94372e-10	-1.49262e-09
		0.0175	-1.34161e-10	-1.03585e-10	-3.94996e-10	-1.49387e-09
		0.01752	-1.32913e-10	-1.03585e-10	-3.9406e-10	-1.49387e-09
		0.01754	-1.34161e-10	-1.04209e-10	-3.9406e-10	-1.49512e-09
		0.01756	-1.34161e-10	-1.05457e-10	-3.94372e-10	-1.49325e-09
		0.01758	-1.34161e-10	-1.06705e-10	-3.9406e-10	-1.49387e-09
		0.0176	-1.35409e-10	-1.07953e-10	-3.93748e-10	-1.49325e-09
		0.01762	-1.35409e-10	-1.07329e-10	-3.93124e-10	-1.49137e-09
		0.01764	-1.37281e-10	-1.08577e-10	-3.925e-10	-1.49013e-09
		0.01766	-1.37281e-10	-1.07329e-10	-3.92812e-10	-1.48825e-09
		0.01768	-1.38529e-10	-1.06705e-10	-3.93124e-10	-1.48825e-09
		0.0177	-1.39153e-10	-1.04833e-10	-3.93436e-10	-1.48763e-09
		0.01772	-1.40401e-10	-1.04209e-10	-3.93436e-10	-1.48638e-09
		0.01774	-1.40401e-10	-1.03585e-10	-3.9406e-10	-1.48701e-09
		0.01776	-1.42273e-10	-1.02337e-10	-3.9406e-10	-1.48763e-09
		0.01778	-1.41025e-10	-1.04209e-10	-3.93436e-10	-1.48825e-09
		0.0178	-1.43521e-10	-1.04833e-10	-3.93124e-10	-1.48888e-09
		0.01782	-1.41025e-10	-1.06705e-10	-3.92812e-10	-1.48825e-09
		0.01784	-1.40401e-10	-1.07329e-10	-3.925e-10	-1.48763e-09
		0.01786	-1.39777e-10	-1.07953e-10	-3.92188e-10	-1.48638e-09
		0.01788	-1.36657e-10	-1.09201e-10	-3.92188e-10	-1.48638e-09
		0.0179	-1.35409e-10	-1.07953e-10	-3.925e-10	-1.48763e-09
		0.01792	-1.35409e-10	-1.07329e-10	-3.91876e-10	-1.48888e-09
		0.01794	-1.34785e-10	-1.07329e-10	-3.91564e-10	-1.49075e-09
		0.01796	-1.36657e-10	-1.07329e-10	-3.92188e-10	-1.492e-09
		0.01798	-1.37281e-10	-1.07329e-10	-3.92188e-10	-1.49325e-09
		0.018	-1.37281e-10	-1.06705e-10	-3.93436e-10	-1.49387e-09
		0.01802	-1.37281e-10	-1.04833e-10	-3.94372e-10	-1.49325e-09
		0.01804	-1.37281e-10	-1.04833e-10	-3.95308e-10	-1.48888e-09
		0.01806	-1.34785e-10	-1.04209e-10	-3.94684e-10	-1.48888e-09
		0.01808	-1.35409e-10	-1.04209e-10	-3.95308e-10	-1.48763e-09
		0.0181	-1.34785e-10	-1.02961e-10	-3.94684e-10	-1.48825e-09
		0.01812	-1.36033e-10	-1.03585e-10	-3.925e-10	-1.48888e-09
		0.01814	-1.37905e-10	-1.01713e-10	-3.92188e-10	-1.48888e-09
		0.01816	-1.38529e-10	-1.01713e-10	-3.9094e-10	-1.48825e-09
		0.01818	-1.39153e-10	-1.01713e-10	-3.90316e-10	-1.48888e-09
		0.0182	-1.38529e-10	-1.01713e-10	-3.91252e-10	-1.48825e-09
		0.01822	-1.38529e-10	-1.04209e-10	-3.91876e-10	-1.48825e-09
		0.01824	-1.37905e-10	-1.05457e-10	-3.92812e-10	-1.4895e-09
		0.01826	-1.37905e-10	-1.07329e-10	-3.93124e-10	-1.48825e-09
		0.01828	-1.37905e-10	-1.07953e-10	-3.93748e-10	-1.49013e-09
		0.0183	-1.37905e-10	-1.09201e-10	-3.94684e-10	-1.48888e-09
		0.01832	-1.38529e-10	-1.07953e-10	-3.94996e-10	-1.49075e-09
		0.01834	-1.39153e-10	-1.06081e-10	-3.95308e-10	-1.492e-09
		0.01836	-1.38529e-10	-1.05457e-10	-3.96244e-10	-1.49512e-09
		0.01838	-1.36657e-10	-1.04833e-10	-3.9562e-10	-1.49761e-09
		0.0184	-1.35409e-10	-1.03585e-10	-3.95308e-10	-1.49886e-09
		0.01842	-1.36033e-10	-1.01089e-10	-3.93748e-10	-1.50011e-09
		0.01844	-1.31665e-10	-1.01713e-10	-3.93748e-10	-1.50073e-09
		0.01846	-1.31665e-10	-1.02337e-10	-3.93748e-10	-1.50198e-09
		0.01848	-1.31041e-10	-9.98409e-11	-3.93436e-10	-1.49949e-09
		0.0185	-1.31041e-10	-1.01089e-10	-3.93124e-10	-1.50011e-09
		0.01852	-1.29793e-10	-1.00465e-10	-3.925e-10	-1.49886e-09
		0.01854	-1.31041e-10	-1.00465e-10	-3.92188e-10	-1.49637e-09
		0.01856	-1.32289e-10	-1.01089e-10	-3.91252e-10	-1.49387e-09
		0.01858	-1.32913e-10	-1.01089e-10	-3.91876e-10	-1.49262e-09
		0.0186	-1.35409e-10	-1.01089e-10	-3.91252e-10	-1.49137e-09
		0.01862	-1.36033e-10	-1.04209e-10	-3.925e-10	-1.492e-09
		0.01864	-1.37905e-10	-1.04209e-10	-3.92188e-10	-1.49075e-09
		0.01866	-1.37905e-10	-1.03585e-10	-3.92812e-10	-1.49137e-09
		0.01868	-1.37281e-10	-1.03585e-10	-3.93124e-10	-1.492e-09
		0.0187	-1.35409e-10	-1.05457e-10	-3.9406e-10	-1.49262e-09
		0.01872	-1.36657e-10	-1.06705e-10	-3.93124e-10	-1.492e-09
		0.01874	-1.36657e-10	-1.06081e-10	-3.94684e-10	-1.492e-09
		0.01876	-1.37905e-10	-1.06705e-10	-3.95308e-10	-1.49137e-09
		0.01878	-1.39153e-10	-1.06705e-10	-3.9562e-10	-1.49325e-09
		0.0188	-1.39153e-10	-1.06081e-10	-3.96556e-10	-1.49387e-09
		0.01882	-1.37281e-10	-1.06081e-10	-3.96556e-10	-1.49449e-09
		0.01884	-1.36657e-10	-1.06081e-10	-3.9718e-10	-1.49512e-09
		0.01886	-1.36033e-10	-1.06081e-10	-3.96556e-10	-1.49325e-09
		0.01888	-1.36033e-10	-1.06081e-10	-3.9718e-10	-1.49262e-09
		0.0189	-1.35409e-10	-1.05457e-10	-3.9562e-10	-1.49137e-09
		0.01892	-1.35409e-10	-1.04209e-10	-3.95308e-10	-1.49137e-09
		0.01894	-1.35409e-10	-1.04209e-10	-3.94684e-10	-1.48888e-09
		0.01896	-1.36657e-10	-1.04209e-10	-3.94372e-10	-1.48763e-09
		0.01898	-1.35409e-10	-1.03585e-10	-3.9406e-10	-1.48576e-09
		0.019	-1.35409e-10	-1.03585e-10	-3.93748e-10	-1.48825e-09
		0.01902	-1.32289e-10	-1.03585e-10	-3.92812e-10	-1.48825e-09
		0.01904	-1.32289e-10	-1.06081e-10	-3.91564e-10	-1.48825e-09
		0.01906	-1.32289e-10	-1.07329e-10	-3.92188e-10	-1.48825e-09
		0.01908	-1.34785e-10	-1.09825e-10	-3.91876e-10	-1.48888e-09
		0.0191	-1.35409e-10	-1.09825e-10	-3.92188e-10	-1.48888e-09
		0.01912	-1.37281e-10	-1.10449e-10	-3.92188e-10	-1.49137e-09
		0.01914	-1.39153e-10	-1.09825e-10	-3.91876e-10	-1.49262e-09
		0.01916	-1.38529e-10	-1.09201e-10	-3.925e-10	-1.49449e-09
		0.01918	-1.37905e-10	-1.09825e-10	-3.93124e-10	-1.49449e-09
		0.0192	-1.37281e-10	-1.07953e-10	-3.9406e-10	-1.49761e-09
		0.01922	-1.36033e-10	-1.07329e-10	-3.93436e-10	-1.49574e-09
		0.01924	-1.34161e-10	-1.06705e-10	-3.93748e-10	-1.49449e-09
		0.01926	-1.34161e-10	-1.07329e-10	-3.93748e-10	-1.49387e-09
		0.01928	-1.34161e-10	-1.04833e-10	-3.94372e-10	-1.49325e-09
		0.0193	-1.34785e-10	-1.04209e-10	-3.9562e-10	-1.49262e-09
		0.01932	-1.35409e-10	-1.04209e-10	-3.96556e-10	-1.49137e-09
		0.01934	-1.36657e-10	-1.03585e-10	-3.9718e-10	-1.49137e-09
		0.01936	-1.36657e-10	-1.06081e-10	-3.97804e-10	-1.49137e-09
		0.01938	-1.36033e-10	-1.07329e-10	-3.97492e-10	-1.48763e-09
		0.0194	-1.33537e-10	-1.07329e-10	-3.96868e-10	-1.48701e-09
		0.01942	-1.32913e-10	-1.07329e-10	-3.9562e-10	-1.48638e-09
		0.01944	-1.30417e-10	-1.06081e-10	-3.9406e-10	-1.48763e-09
		0.01946	-1.31041e-10	-1.06705e-10	-3.92812e-10	-1.48701e-09
		0.01948	-1.32289e-10	-1.07953e-10	-3.92188e-10	-1.48763e-09
		0.0195	-1.32289e-10	-1.07329e-10	-3.91876e-10	-1.48701e-09
		0.01952	-1.33537e-10	-1.09201e-10	-3.90628e-10	-1.48701e-09
		0.01954	-1.36657e-10	-1.07329e-10	-3.90004e-10	-1.48701e-09
		0.01956	-1.35409e-10	-1.07953e-10	-3.89068e-10	-1.48763e-09
		0.01958	-1.37281e-10	-1.07953e-10	-3.88756e-10	-1.48763e-09
		0.0196	-1.38529e-10	-1.07953e-10	-3.87508e-10	-1.48825e-09
		0.01962	-1.41649e-10	-1.07953e-10	-3.88132e-10	-1.49013e-09
		0.01964	-1.41649e-10	-1.07953e-10	-3.8938e-10	-1.49075e-09
		0.01966	-1.41025e-10	-1.07329e-10	-3.90316e-10	-1.492e-09
		0.01968	-1.41025e-10	-1.06081e-10	-3.92188e-10	-1.492e-09
		0.0197	-1.40401e-10	-1.05457e-10	-3.93124e-10	-1.49262e-09
		0.01972	-1.37905e-10	-1.04209e-10	-3.93436e-10	-1.48888e-09
		0.01974	-1.36033e-10	-1.05457e-10	-3.93124e-10	-1.4895e-09
		0.01976	-1.35409e-10	-1.04833e-10	-3.93748e-10	-1.48763e-09
		0.01978	-1.36033e-10	-1.04833e-10	-3.93124e-10	-1.48763e-09
		0.0198	-1.35409e-10	-1.04833e-10	-3.91876e-10	-1.48638e-09
		0.01982	-1.37905e-10	-1.05457e-10	-3.91564e-10	-1.48825e-09
		0.01984	-1.37281e-10	-1.03585e-10	-3.90316e-10	-1.49013e-09
		0.01986	-1.37281e-10	-1.04209e-10	-3.9094e-10	-1.49137e-09
		0.01988	-1.36033e-10	-1.03585e-10	-3.90316e-10	-1.49075e-09
		0.0199	-1.36033e-10	-1.04833e-10	-3.92812e-10	-1.48888e-09
		0.01992	-1.37281e-10	-1.04833e-10	-3.93124e-10	-1.4895e-09
		0.01994	-1.36033e-10	-1.07329e-10	-3.93436e-10	-1.4895e-09
		0.01996	-1.33537e-10	-1.07953e-10	-3.93436e-10	-1.4895e-09
		0.01998	-1.33537e-10	-1.08577e-10	-3.93748e-10	-1.48888e-09
		0.02	-1.31665e-10	-1.08577e-10	-3.94684e-10	-1.49013e-09
		0.02002	-1.31665e-10	-1.07953e-10	-3.93748e-10	-1.4895e-09
		0.02004	-1.33537e-10	-1.07329e-10	-3.93124e-10	-1.4895e-09
		0.02006	-1.32913e-10	-1.09201e-10	-3.925e-10	-1.492e-09
		0.02008	-1.34161e-10	-1.08577e-10	-3.925e-10	-1.49325e-09
		0.0201	-1.35409e-10	-1.08577e-10	-3.91876e-10	-1.49387e-09
		0.02012	-1.36033e-10	-1.09201e-10	-3.93436e-10	-1.49449e-09
		0.02014	-1.36033e-10	-1.07329e-10	-3.93748e-10	-1.49137e-09
		0.02016	-1.36657e-10	-1.07329e-10	-3.94372e-10	-1.48888e-09
		0.02018	-1.37281e-10	-1.07329e-10	-3.94372e-10	-1.48825e-09
		0.0202	-1.36657e-10	-1.07953e-10	-3.9406e-10	-1.48825e-09
		0.02022	-1.37905e-10	-1.06081e-10	-3.93748e-10	-1.49013e-09
		0.02024	-1.37905e-10	-1.04833e-10	-3.93748e-10	-1.49262e-09
		0.02026	-1.36033e-10	-1.04833e-10	-3.94372e-10	-1.49387e-09
		0.02028	-1.34785e-10	-1.03585e-10	-3.93748e-10	-1.49512e-09
		0.0203	-1.32913e-10	-1.04209e-10	-3.93748e-10	-1.49387e-09
		0.02032	-1.31665e-10	-1.02337e-10	-3.92812e-10	-1.49262e-09
		0.02034	-1.31041e-10	-1.03585e-10	-3.91564e-10	-1.492e-09
		0.02036	-1.31665e-10	-1.02961e-10	-3.91876e-10	-1.49013e-09
		0.02038	-1.33537e-10	-1.02337e-10	-3.91252e-10	-1.49013e-09
		0.0204	-1.36033e-10	-1.02337e-10	-3.925e-10	-1.4895e-09
		0.02042	-1.36657e-10	-1.02961e-10	-3.92812e-10	-1.49013e-09
		0.02044	-1.38529e-10	-1.04833e-10	-3.925e-10	-1.49137e-09
		0.02046	-1.40401e-10	-1.04209e-10	-3.9406e-10	-1.49137e-09
		0.02048	-1.39153e-10	-1.04833e-10	-3.93748e-10	-1.492e-09
		0.0205	-1.39153e-10	-1.03585e-10	-3.94372e-10	-1.492e-09
		0.02052	-1.38529e-10	-1.02961e-10	-3.93436e-10	-1.48888e-09
		0.02054	-1.37905e-10	-1.02961e-10	-3.9406e-10	-1.48825e-09
		0.02056	-1.36657e-10	-1.01089e-10	-3.94684e-10	-1.48763e-09
		0.02058	-1.36657e-10	-1.01713e-10	-3.93748e-10	-1.48888e-09
		0.0206	-1.35409e-10	-1.02337e-10	-3.9406e-10	-1.49013e-09
		0.02062	-1.35409e-10	-1.03585e-10	-3.94684e-10	-1.492e-09
		0.02064	-1.36033e-10	-1.04833e-10	-3.94372e-10	-1.49262e-09
		0.02066	-1.36033e-10	-1.06705e-10	-3.9562e-10	-1.49387e-09
		0.02068	-1.34161e-10	-1.07329e-10	-3.9562e-10	-1.49325e-09
		0.0207	-1.34785e-10	-1.07329e-10	-3.96244e-10	-1.49325e-09
		0.02072	-1.35409e-10	-1.07329e-10	-3.96868e-10	-1.49325e-09
		0.02074	-1.36033e-10	-1.09201e-10	-3.96868e-10	-1.49262e-09
		0.02076	-1.37281e-10	-1.11073e-10	-3.96556e-10	-1.49325e-09
		0.02078	-1.40401e-10	-1.10449e-10	-3.97804e-10	-1.49449e-09
		0.0208	-1.39777e-10	-1.09825e-10	-3.98116e-10	-1.49449e-09
		0.02082	-1.39777e-10	-1.06705e-10	-3.97804e-10	-1.49512e-09
		0.02084	-1.39153e-10	-1.05457e-10	-3.96556e-10	-1.49512e-09
		0.02086	-1.38529e-10	-1.04209e-10	-3.9562e-10	-1.49449e-09
		0.02088	-1.37905e-10	-1.02961e-10	-3.9406e-10	-1.49262e-09
		0.0209	-1.34161e-10	-1.00465e-10	-3.93436e-10	-1.49262e-09
		0.02092	-1.34161e-10	-1.01713e-10	-3.91876e-10	-1.49075e-09
		0.02094	-1.32913e-10	-1.04833e-10	-3.92188e-10	-1.49137e-09
		0.02096	-1.34785e-10	-1.04209e-10	-3.93124e-10	-1.49325e-09
		0.02098	-1.37281e-10	-1.06081e-10	-3.94372e-10	-1.49325e-09
		0.021	-1.39777e-10	-1.06081e-10	-3.94684e-10	-1.49325e-09
		0.02102	-1.41649e-10	-1.06081e-10	-3.96244e-10	-1.49449e-09
		0.02104	-1.40401e-10	-1.06081e-10	-3.95308e-10	-1.49262e-09
		0.02106	-1.38529e-10	-1.05457e-10	-3.94684e-10	-1.49262e-09
		0.02108	-1.39153e-10	-1.04209e-10	-3.92188e-10	-1.49262e-09
		0.0211	-1.36657e-10	-1.06081e-10	-3.91252e-10	-1.49325e-09
		0.02112	-1.34785e-10	-1.04833e-10	-3.90004e-10	-1.49449e-09
		0.02114	-1.35409e-10	-1.06705e-10	-3.89068e-10	-1.49699e-09
		0.02116	-1.34785e-10	-1.06081e-10	-3.90004e-10	-1.49824e-09
		0.02118	-1.34785e-10	-1.06705e-10	-3.90628e-10	-1.49886e-09
		0.0212	-1.34785e-10	-1.05457e-10	-3.92188e-10	-1.49824e-09
		0.02122	-1.34161e-10	-1.05457e-10	-3.93748e-10	-1.49761e-09
		0.02124	-1.31041e-10	-1.04209e-10	-3.93436e-10	-1.49637e-09
		0.02126	-1.31041e-10	-1.04833e-10	-3.93748e-10	-1.49637e-09
		0.02128	-1.32913e-10	-1.04833e-10	-3.94372e-10	-1.49512e-09
		0.0213	-1.31041e-10	-1.06705e-10	-3.94684e-10	-1.49325e-09
		0.02132	-1.32289e-10	-1.07329e-10	-3.94996e-10	-1.49387e-09
		0.02134	-1.31665e-10	-1.07329e-10	-3.9562e-10	-1.49262e-09
		0.02136	-1.31665e-10	-1.07329e-10	-3.96244e-10	-1.49262e-09
		0.02138	-1.32289e-10	-1.07953e-10	-3.96868e-10	-1.49262e-09
		0.0214	-1.33537e-10	-1.07329e-10	-3.9562e-10	-1.49325e-09
		0.02142	-1.31665e-10	-1.07329e-10	-3.95932e-10	-1.49449e-09
		0.02144	-1.32913e-10	-1.06705e-10	-3.95932e-10	-1.49449e-09
		0.02146	-1.32289e-10	-1.05457e-10	-3.96556e-10	-1.49325e-09
		0.02148	-1.33537e-10	-1.03585e-10	-3.9718e-10	-1.49325e-09
		0.0215	-1.33537e-10	-1.02961e-10	-3.97804e-10	-1.49137e-09
		0.02152	-1.34785e-10	-1.03585e-10	-3.9874e-10	-1.49137e-09
		0.02154	-1.34161e-10	-1.03585e-10	-3.99052e-10	-1.49075e-09
		0.02156	-1.37905e-10	-1.05457e-10	-3.9874e-10	-1.49013e-09
		0.02158	-1.37905e-10	-1.06705e-10	-3.97492e-10	-1.49075e-09
		0.0216	-1.39153e-10	-1.07953e-10	-3.97492e-10	-1.48888e-09
		0.02162	-1.39153e-10	-1.09201e-10	-3.96244e-10	-1.49013e-09
		0.02164	-1.37905e-10	-1.10449e-10	-3.95308e-10	-1.49013e-09
		0.02166	-1.39777e-10	-1.09825e-10	-3.9562e-10	-1.49137e-09
		0.02168	-1.38529e-10	-1.09201e-10	-3.9718e-10	-1.49075e-09
		0.0217	-1.39153e-10	-1.09825e-10	-3.96244e-10	-1.49013e-09
		0.02172	-1.39153e-10	-1.08577e-10	-3.95932e-10	-1.49075e-09
		0.02174	-1.38529e-10	-1.06705e-10	-3.94684e-10	-1.4895e-09
		0.02176	-1.38529e-10	-1.06081e-10	-3.93124e-10	-1.48825e-09
		0.02178	-1.37281e-10	-1.06705e-10	-3.92188e-10	-1.48763e-09
		0.0218	-1.36033e-10	-1.07329e-10	-3.91876e-10	-1.48701e-09
		0.02182	-1.35409e-10	-1.07329e-10	-3.91564e-10	-1.48888e-09
		0.02184	-1.35409e-10	-1.06705e-10	-3.9094e-10	-1.48763e-09
		0.02186	-1.37281e-10	-1.07329e-10	-3.90628e-10	-1.4895e-09
		0.02188	-1.38529e-10	-1.06081e-10	-3.91564e-10	-1.4895e-09
		0.0219	-1.38529e-10	-1.07329e-10	-3.91876e-10	-1.4895e-09
		0.02192	-1.39153e-10	-1.05457e-10	-3.925e-10	-1.49075e-09
		0.02194	-1.38529e-10	-1.06705e-10	-3.92812e-10	-1.492e-09
		0.02196	-1.37905e-10	-1.06705e-10	-3.93124e-10	-1.49013e-09
		0.02198	-1.38529e-10	-1.05457e-10	-3.93124e-10	-1.49075e-09
		0.022	-1.37905e-10	-1.04833e-10	-3.93436e-10	-1.49013e-09
		0.02202	-1.39153e-10	-1.04833e-10	-3.92188e-10	-1.48888e-09
		0.02204	-1.37905e-10	-1.04833e-10	-3.91564e-10	-1.48825e-09
		0.02206	-1.39153e-10	-1.06081e-10	-3.92188e-10	-1.48701e-09
		0.02208	-1.38529e-10	-1.05457e-10	-3.91876e-10	-1.48701e-09
		0.0221	-1.37905e-10	-1.06081e-10	-3.93436e-10	-1.48638e-09
		0.02212	-1.37281e-10	-1.07329e-10	-3.94372e-10	-1.48638e-09
		0.02214	-1.34785e-10	-1.07953e-10	-3.95308e-10	-1.48701e-09
		0.02216	-1.32289e-10	-1.07953e-10	-3.96556e-10	-1.48825e-09
		0.02218	-1.32289e-10	-1.08577e-10	-3.96556e-10	-1.48701e-09
		0.0222	-1.32289e-10	-1.08577e-10	-3.95932e-10	-1.48638e-09
		0.02222	-1.33537e-10	-1.07329e-10	-3.96244e-10	-1.48638e-09
		0.02224	-1.36033e-10	-1.07329e-10	-3.96556e-10	-1.48638e-09
		0.02226	-1.37905e-10	-1.07329e-10	-3.96868e-10	-1.48576e-09
		0.02228	-1.38529e-10	-1.09201e-10	-3.9718e-10	-1.48264e-09
		0.0223	-1.39153e-10	-1.10449e-10	-3.97492e-10	-1.48513e-09
		0.02232	-1.39153e-10	-1.09825e-10	-3.98116e-10	-1.48763e-09
		0.02234	-1.37905e-10	-1.07953e-10	-3.98428e-10	-1.4895e-09
		0.02236	-1.36033e-10	-1.06081e-10	-3.98116e-10	-1.49137e-09
		0.02238	-1.36033e-10	-1.06705e-10	-3.97492e-10	-1.492e-09
		0.0224	-1.37281e-10	-1.04833e-10	-3.95932e-10	-1.49325e-09
		0.02242	-1.36657e-10	-1.05457e-10	-3.95308e-10	-1.49262e-09
		0.02244	-1.37905e-10	-1.06081e-10	-3.94684e-10	-1.49013e-09
		0.02246	-1.34785e-10	-1.05457e-10	-3.94684e-10	-1.49075e-09
		0.02248	-1.35409e-10	-1.05457e-10	-3.96244e-10	-1.48825e-09
		0.0225	-1.34785e-10	-1.06081e-10	-3.96868e-10	-1.48576e-09
		0.02252	-1.35409e-10	-1.07329e-10	-3.98428e-10	-1.48825e-09
		0.02254	-1.36033e-10	-1.05457e-10	-3.99676e-10	-1.4895e-09
		0.02256	-1.38529e-10	-1.04833e-10	-4.003e-10	-1.49137e-09
		0.02258	-1.39777e-10	-1.03585e-10	-3.99676e-10	-1.49387e-09
		0.0226	-1.36657e-10	-1.06081e-10	-3.99364e-10	-1.49512e-09
		0.02262	-1.37905e-10	-1.06081e-10	-3.9874e-10	-1.49761e-09
		0.02264	-1.38529e-10	-1.07329e-10	-3.96868e-10	-1.50198e-09
		0.02266	-1.39153e-10	-1.08577e-10	-3.96556e-10	-1.50323e-09
		0.02268	-1.38529e-10	-1.09201e-10	-3.96244e-10	-1.50448e-09
		0.0227	-1.37281e-10	-1.07953e-10	-3.96244e-10	-1.50635e-09
		0.02272	-1.34785e-10	-1.07953e-10	-3.95308e-10	-1.5051e-09
		0.02274	-1.34785e-10	-1.07329e-10	-3.95308e-10	-1.50635e-09
		0.02276	-1.35409e-10	-1.07329e-10	-3.94684e-10	-1.5051e-09
		0.02278	-1.36033e-10	-1.07329e-10	-3.9406e-10	-1.50448e-09
		0.0228	-1.36657e-10	-1.07329e-10	-3.93124e-10	-1.50448e-09
		0.02282	-1.37281e-10	-1.07329e-10	-3.93748e-10	-1.50323e-09
		0.02284	-1.36033e-10	-1.07329e-10	-3.94372e-10	-1.50073e-09
		0.02286	-1.36033e-10	-1.09825e-10	-3.95308e-10	-1.50136e-09
		0.02288	-1.36033e-10	-1.08577e-10	-3.96556e-10	-1.49886e-09
		0.0229	-1.36033e-10	-1.10449e-10	-3.9874e-10	-1.49886e-09
		0.02292	-1.35409e-10	-1.09825e-10	-3.99052e-10	-1.49637e-09
		0.02294	-1.36033e-10	-1.10449e-10	-3.9874e-10	-1.49699e-09
		0.02296	-1.36033e-10	-1.09825e-10	-3.98116e-10	-1.49574e-09
		0.02298	-1.36657e-10	-1.07953e-10	-3.98116e-10	-1.49387e-09
		0.023	-1.36657e-10	-1.07953e-10	-3.9718e-10	-1.49449e-09
		0.02302	-1.36657e-10	-1.07329e-10	-3.9562e-10	-1.49262e-09
		0.02304	-1.37281e-10	-1.06081e-10	-3.94996e-10	-1.49137e-09
		0.02306	-1.34785e-10	-1.06705e-10	-3.94996e-10	-1.49137e-09
		0.02308	-1.37281e-10	-1.05457e-10	-3.94996e-10	-1.4895e-09
		0.0231	-1.36657e-10	-1.06081e-10	-3.94372e-10	-1.49013e-09
		0.02312	-1.36033e-10	-1.06081e-10	-3.925e-10	-1.49013e-09
		0.02314	-1.36033e-10	-1.08577e-10	-3.91876e-10	-1.49137e-09
		0.02316	-1.36033e-10	-1.09201e-10	-3.91564e-10	-1.492e-09
		0.02318	-1.36657e-10	-1.09201e-10	-3.92188e-10	-1.49325e-09
		0.0232	-1.36033e-10	-1.09825e-10	-3.93124e-10	-1.49449e-09
		0.02322	-1.36033e-10	-1.09825e-10	-3.95308e-10	-1.49512e-09
		0.02324	-1.35409e-10	-1.11697e-10	-3.94996e-10	-1.49699e-09
		0.02326	-1.35409e-10	-1.08577e-10	-3.94996e-10	-1.49574e-09
		0.02328	-1.34785e-10	-1.07953e-10	-3.95308e-10	-1.49574e-09
		0.0233	-1.35409e-10	-1.06705e-10	-3.93748e-10	-1.49637e-09
		0.02332	-1.35409e-10	-1.06081e-10	-3.93748e-10	-1.49574e-09
		0.02334	-1.36657e-10	-1.04833e-10	-3.9406e-10	-1.49512e-09
		0.02336	-1.37281e-10	-1.04833e-10	-3.93436e-10	-1.49512e-09
		0.02338	-1.39153e-10	-1.04209e-10	-3.93748e-10	-1.49325e-09
		0.0234	-1.38529e-10	-1.04833e-10	-3.93436e-10	-1.492e-09
		0.02342	-1.39777e-10	-1.05457e-10	-3.93124e-10	-1.4895e-09
		0.02344	-1.39777e-10	-1.06705e-10	-3.93436e-10	-1.492e-09
		0.02346	-1.41025e-10	-1.09825e-10	-3.93124e-10	-1.49013e-09
		0.02348	-1.40401e-10	-1.10449e-10	-3.94372e-10	-1.49262e-09
		0.0235	-1.39153e-10	-1.09825e-10	-3.95308e-10	-1.492e-09
		0.02352	-1.38529e-10	-1.10449e-10	-3.94372e-10	-1.492e-09
		0.02354	-1.38529e-10	-1.11073e-10	-3.93748e-10	-1.492e-09
		0.02356	-1.37281e-10	-1.09825e-10	-3.93124e-10	-1.48825e-09
		0.02358	-1.35409e-10	-1.09825e-10	-3.925e-10	-1.48825e-09
		0.0236	-1.36033e-10	-1.09201e-10	-3.91876e-10	-1.48576e-09
		0.02362	-1.37281e-10	-1.06705e-10	-3.92188e-10	-1.48513e-09
		0.02364	-1.39777e-10	-1.04833e-10	-3.925e-10	-1.48638e-09
		0.02366	-1.41025e-10	-1.04209e-10	-3.93748e-10	-1.48576e-09
		0.02368	-1.41025e-10	-1.05457e-10	-3.94372e-10	-1.48638e-09
		0.0237	-1.40401e-10	-1.05457e-10	-3.95308e-10	-1.48451e-09
		0.02372	-1.39153e-10	-1.05457e-10	-3.94996e-10	-1.48513e-09
		0.02374	-1.38529e-10	-1.06081e-10	-3.9562e-10	-1.48389e-09
		0.02376	-1.37905e-10	-1.06705e-10	-3.94996e-10	-1.48638e-09
		0.02378	-1.38529e-10	-1.06081e-10	-3.95308e-10	-1.48763e-09
		0.0238	-1.38529e-10	-1.05457e-10	-3.94372e-10	-1.4895e-09
		0.02382	-1.36657e-10	-1.06705e-10	-3.93748e-10	-1.49262e-09
		0.02384	-1.36657e-10	-1.06081e-10	-3.92812e-10	-1.49449e-09
		0.02386	-1.35409e-10	-1.05457e-10	-3.92812e-10	-1.49637e-09
		0.02388	-1.36657e-10	-1.06081e-10	-3.93124e-10	-1.49325e-09
		0.0239	-1.38529e-10	-1.04209e-10	-3.93124e-10	-1.492e-09
		0.02392	-1.38529e-10	-1.04833e-10	-3.93748e-10	-1.48763e-09
		0.02394	-1.38529e-10	-1.06081e-10	-3.9406e-10	-1.48763e-09
		0.02396	-1.37905e-10	-1.06705e-10	-3.94372e-10	-1.4895e-09
		0.02398	-1.37281e-10	-1.06705e-10	-3.9562e-10	-1.49013e-09
		0.024	-1.34785e-10	-1.07329e-10	-3.9562e-10	-1.49075e-09
		0.02402	-1.36033e-10	-1.07953e-10	-3.95932e-10	-1.492e-09
		0.02404	-1.34161e-10	-1.06705e-10	-3.96556e-10	-1.49137e-09
		0.02406	-1.35409e-10	-1.07329e-10	-3.96244e-10	-1.49137e-09
		0.02408	-1.35409e-10	-1.07329e-10	-3.9718e-10	-1.49075e-09
		0.0241	-1.37905e-10	-1.07329e-10	-3.96868e-10	-1.4895e-09
		0.02412	-1.36657e-10	-1.09825e-10	-3.96868e-10	-1.4895e-09
		0.02414	-1.37281e-10	-1.10449e-10	-3.98116e-10	-1.4895e-09
		0.02416	-1.36657e-10	-1.10449e-10	-3.9718e-10	-1.49075e-09
		0.02418	-1.36657e-10	-1.10449e-10	-3.96556e-10	-1.49137e-09
		0.0242	-1.37281e-10	-1.07953e-10	-3.9562e-10	-1.49387e-09
		0.02422	-1.38529e-10	-1.07953e-10	-3.9562e-10	-1.49325e-09
		0.02424	-1.39153e-10	-1.08577e-10	-3.95308e-10	-1.49325e-09
		0.02426	-1.38529e-10	-1.07953e-10	-3.94684e-10	-1.49262e-09
		0.02428	-1.38529e-10	-1.08577e-10	-3.95932e-10	-1.49075e-09
		0.0243	-1.39153e-10	-1.08577e-10	-3.96244e-10	-1.49137e-09
		0.02432	-1.39153e-10	-1.08577e-10	-3.96244e-10	-1.4895e-09
		0.02434	-1.38529e-10	-1.08577e-10	-3.96556e-10	-1.49137e-09
		0.02436	-1.39777e-10	-1.06705e-10	-3.9562e-10	-1.49075e-09
		0.02438	-1.40401e-10	-1.06705e-10	-3.95308e-10	-1.48888e-09
		0.0244	-1.41025e-10	-1.09201e-10	-3.94372e-10	-1.48888e-09
		0.02442	-1.40401e-10	-1.07953e-10	-3.94372e-10	-1.49013e-09
		0.02444	-1.39153e-10	-1.11073e-10	-3.9406e-10	-1.48888e-09
		0.02446	-1.37281e-10	-1.11697e-10	-3.94372e-10	-1.49013e-09
		0.02448	-1.36657e-10	-1.12321e-10	-3.94996e-10	-1.49137e-09
		0.0245	-1.34161e-10	-1.10449e-10	-3.96244e-10	-1.492e-09
		0.02452	-1.30417e-10	-1.07953e-10	-3.97492e-10	-1.49449e-09
		0.02454	-1.30417e-10	-1.07329e-10	-3.99052e-10	-1.49512e-09
		0.02456	-1.29793e-10	-1.05457e-10	-3.99052e-10	-1.49387e-09
		0.02458	-1.33537e-10	-1.03585e-10	-3.99988e-10	-1.49387e-09
		0.0246	-1.36033e-10	-1.04209e-10	-3.99052e-10	-1.49013e-09
		0.02462	-1.38529e-10	-1.04209e-10	-3.98428e-10	-1.4895e-09
		0.02464	-1.40401e-10	-1.02961e-10	-3.9874e-10	-1.4895e-09
		0.02466	-1.41025e-10	-1.02337e-10	-3.98428e-10	-1.49013e-09
		0.02468	-1.40401e-10	-1.02337e-10	-3.9874e-10	-1.48888e-09
		0.0247	-1.41649e-10	-1.02961e-10	-3.9874e-10	-1.4895e-09
		0.02472	-1.42897e-10	-1.01713e-10	-3.99364e-10	-1.4895e-09
		0.02474	-1.42897e-10	-1.03585e-10	-3.98428e-10	-1.49137e-09
		0.02476	-1.43521e-10	-1.04209e-10	-3.98116e-10	-1.49262e-09
		0.02478	-1.42273e-10	-1.06705e-10	-3.9718e-10	-1.49387e-09
		0.0248	-1.41649e-10	-1.08577e-10	-3.9718e-10	-1.49449e-09
		0.02482	-1.39153e-10	-1.08577e-10	-3.97492e-10	-1.49512e-09
		0.02484	-1.36657e-10	-1.09825e-10	-3.98428e-10	-1.49574e-09
		0.02486	-1.37281e-10	-1.09825e-10	-3.9874e-10	-1.49637e-09
		0.02488	-1.35409e-10	-1.10449e-10	-3.98428e-10	-1.49574e-09
		0.0249	-1.36033e-10	-1.08577e-10	-3.98116e-10	-1.49325e-09
		0.02492	-1.36657e-10	-1.09201e-10	-3.96556e-10	-1.49387e-09
		0.02494	-1.39153e-10	-1.06705e-10	-3.95308e-10	-1.492e-09
		0.02496	-1.38529e-10	-1.07953e-10	-3.94996e-10	-1.4895e-09
		0.02498	-1.39153e-10	-1.06705e-10	-3.9406e-10	-1.49013e-09
		0.025	-1.38529e-10	-1.07329e-10	-3.9406e-10	-1.4895e-09
		0.02502	-1.39153e-10	-1.08577e-10	-3.93748e-10	-1.4895e-09
		0.02504	-1.37281e-10	-1.09201e-10	-3.9406e-10	-1.48888e-09
		0.02506	-1.37281e-10	-1.09201e-10	-3.93748e-10	-1.48888e-09
		0.02508	-1.38529e-10	-1.09201e-10	-3.94372e-10	-1.4895e-09
		0.0251	-1.37905e-10	-1.09825e-10	-3.9562e-10	-1.49013e-09
		0.02512	-1.36657e-10	-1.07329e-10	-3.96556e-10	-1.49075e-09
		0.02514	-1.36033e-10	-1.06081e-10	-3.96556e-10	-1.49137e-09
		0.02516	-1.32289e-10	-1.05457e-10	-3.97804e-10	-1.49325e-09
		0.02518	-1.32289e-10	-1.05457e-10	-3.96244e-10	-1.492e-09
		0.0252	-1.33537e-10	-1.06081e-10	-3.95308e-10	-1.492e-09
		0.02522	-1.36033e-10	-1.07329e-10	-3.93748e-10	-1.49137e-09
		0.02524	-1.37905e-10	-1.07329e-10	-3.91876e-10	-1.4895e-09
		0.02526	-1.39777e-10	-1.09201e-10	-3.91876e-10	-1.49013e-09
		0.02528	-1.39777e-10	-1.11697e-10	-3.9094e-10	-1.49075e-09
		0.0253	-1.39777e-10	-1.11697e-10	-3.92812e-10	-1.49075e-09
		0.02532	-1.39777e-10	-1.11697e-10	-3.92812e-10	-1.492e-09
		0.02534	-1.39153e-10	-1.11073e-10	-3.93124e-10	-1.49325e-09
		0.02536	-1.37905e-10	-1.09825e-10	-3.92812e-10	-1.49387e-09
		0.02538	-1.37905e-10	-1.07953e-10	-3.91252e-10	-1.49262e-09
		0.0254	-1.37281e-10	-1.06705e-10	-3.90628e-10	-1.49325e-09
		0.02542	-1.38529e-10	-1.06705e-10	-3.8938e-10	-1.492e-09
		0.02544	-1.37905e-10	-1.06705e-10	-3.88444e-10	-1.49137e-09
		0.02546	-1.36033e-10	-1.07329e-10	-3.89068e-10	-1.49262e-09
		0.02548	-1.36033e-10	-1.07953e-10	-3.91252e-10	-1.49449e-09
		0.0255	-1.34161e-10	-1.07953e-10	-3.94684e-10	-1.49449e-09
		0.02552	-1.34161e-10	-1.07329e-10	-4.00612e-10	-1.49387e-09
		0.02554	-1.34161e-10	-1.06081e-10	-4.06852e-10	-1.49512e-09
		0.02556	-1.37905e-10	-1.06081e-10	-4.13092e-10	-1.49262e-09
		0.02558	-1.39777e-10	-1.09201e-10	-4.19956e-10	-1.49262e-09
		0.0256	-1.40401e-10	-1.08577e-10	-4.28068e-10	-1.49262e-09
		0.02562	-1.41649e-10	-1.09825e-10	-4.34932e-10	-1.492e-09
		0.02564	-1.40401e-10	-1.11073e-10	-4.40236e-10	-1.49137e-09
		0.02566	-1.40401e-10	-1.11073e-10	-4.43356e-10	-1.49325e-09
		0.02568	-1.38529e-10	-1.10449e-10	-4.44916e-10	-1.49449e-09
		0.0257	-1.38529e-10	-1.09825e-10	-4.4398e-10	-1.49699e-09
		0.02572	-1.39777e-10	-1.09201e-10	-4.4086e-10	-1.49761e-09
		0.02574	-1.39777e-10	-1.09201e-10	-4.393e-10	-1.49699e-09
		0.02576	-1.39153e-10	-1.08577e-10	-4.37116e-10	-1.49637e-09
		0.02578	-1.39153e-10	-1.08577e-10	-4.34308e-10	-1.49449e-09
		0.0258	-1.39153e-10	-1.07329e-10	-4.31812e-10	-1.49387e-09
		0.02582	-1.37281e-10	-1.06705e-10	-4.30252e-10	-1.49262e-09
		0.02584	-1.33537e-10	-1.07329e-10	-4.28068e-10	-1.492e-09
		0.02586	-1.31041e-10	-1.06081e-10	-4.26508e-10	-1.49325e-09
		0.02588	-1.31665e-10	-1.05457e-10	-4.23076e-10	-1.49137e-09
		0.0259	-1.31665e-10	-1.04833e-10	-4.19956e-10	-1.49137e-09
		0.02592	-1.34785e-10	-1.06705e-10	-4.1746e-10	-1.4895e-09
		0.02594	-1.36657e-10	-1.04833e-10	-4.15276e-10	-1.49075e-09
		0.02596	-1.38529e-10	-1.05457e-10	-4.13092e-10	-1.49262e-09
		0.02598	-1.40401e-10	-1.07953e-10	-4.12156e-10	-1.49137e-09
		0.026	-1.41025e-10	-1.07953e-10	-4.1122e-10	-1.49325e-09
		0.02602	-1.41025e-10	-1.07953e-10	-4.10284e-10	-1.49325e-09
		0.02604	-1.39777e-10	-1.07953e-10	-4.0966e-10	-1.49449e-09
		0.02606	-1.38529e-10	-1.09201e-10	-4.08724e-10	-1.49449e-09
		0.02608	-1.37905e-10	-1.09825e-10	-4.08724e-10	-1.49637e-09
		0.0261	-1.39153e-10	-1.09201e-10	-4.07788e-10	-1.49574e-09
		0.02612	-1.39153e-10	-1.08577e-10	-4.06852e-10	-1.49637e-09
		0.02614	-1.37281e-10	-1.08577e-10	-4.05916e-10	-1.49512e-09
		0.02616	-1.39153e-10	-1.08577e-10	-4.04356e-10	-1.49449e-09
		0.02618	-1.36033e-10	-1.08577e-10	-4.0342e-10	-1.49325e-09
		0.0262	-1.36033e-10	-1.07329e-10	-4.02796e-10	-1.49387e-09
		0.02622	-1.36033e-10	-1.07329e-10	-4.00612e-10	-1.49325e-09
		0.02624	-1.36033e-10	-1.07329e-10	-4.003e-10	-1.49325e-09
		0.02626	-1.37281e-10	-1.07953e-10	-3.99988e-10	-1.492e-09
		0.02628	-1.37281e-10	-1.09201e-10	-3.99364e-10	-1.49262e-09
		0.0263	-1.37281e-10	-1.09201e-10	-3.99364e-10	-1.492e-09
		0.02632	-1.37905e-10	-1.09201e-10	-3.99052e-10	-1.4895e-09
		0.02634	-1.37281e-10	-1.09825e-10	-3.99052e-10	-1.48888e-09
		0.02636	-1.37281e-10	-1.09825e-10	-3.98428e-10	-1.48763e-09
		0.02638	-1.37281e-10	-1.10449e-10	-3.98428e-10	-1.48763e-09
		0.0264	-1.36657e-10	-1.11697e-10	-3.97804e-10	-1.48825e-09
		0.02642	-1.38529e-10	-1.09825e-10	-3.97804e-10	-1.4895e-09
		0.02644	-1.39153e-10	-1.09201e-10	-3.9718e-10	-1.49325e-09
		0.02646	-1.39153e-10	-1.09825e-10	-3.9718e-10	-1.49512e-09
		0.02648	-1.39777e-10	-1.07953e-10	-3.96868e-10	-1.49699e-09
		0.0265	-1.38529e-10	-1.07329e-10	-3.96868e-10	-1.49886e-09
		0.02652	-1.37905e-10	-1.07953e-10	-3.96556e-10	-1.49949e-09
		0.02654	-1.34785e-10	-1.06705e-10	-3.96244e-10	-1.49761e-09
		0.02656	-1.35409e-10	-1.07329e-10	-3.9562e-10	-1.49699e-09
		0.02658	-1.36033e-10	-1.08577e-10	-3.95308e-10	-1.49449e-09
		0.0266	-1.40401e-10	-1.09201e-10	-3.94372e-10	-1.492e-09
		0.02662	-1.41025e-10	-1.09201e-10	-3.94684e-10	-1.49262e-09
		0.02664	-1.41025e-10	-1.09825e-10	-3.94684e-10	-1.49449e-09
		0.02666	-1.43521e-10	-1.09825e-10	-3.95308e-10	-1.49325e-09
		0.02668	-1.43521e-10	-1.09201e-10	-3.94996e-10	-1.49449e-09
		0.0267	-1.44769e-10	-1.09825e-10	-3.94684e-10	-1.49449e-09
		0.02672	-1.41649e-10	-1.07953e-10	-3.92812e-10	-1.49512e-09
		0.02674	-1.42273e-10	-1.06705e-10	-3.91564e-10	-1.49449e-09
		0.02676	-1.42273e-10	-1.04833e-10	-3.91252e-10	-1.49449e-09
		0.02678	-1.41649e-10	-1.06705e-10	-3.89692e-10	-1.492e-09
		0.0268	-1.40401e-10	-1.06081e-10	-3.89692e-10	-1.492e-09
		0.02682	-1.39777e-10	-1.07329e-10	-3.90004e-10	-1.49075e-09
		0.02684	-1.42273e-10	-1.07329e-10	-3.90628e-10	-1.492e-09
		0.02686	-1.44145e-10	-1.07953e-10	-3.91876e-10	-1.492e-09
		0.02688	-1.44769e-10	-1.09201e-10	-3.92812e-10	-1.49013e-09
		0.0269	-1.45393e-10	-1.11697e-10	-3.925e-10	-1.48888e-09
		0.02692	-1.46017e-10	-1.12321e-10	-3.92812e-10	-1.48825e-09
		0.02694	-1.46017e-10	-1.12321e-10	-3.92812e-10	-1.48701e-09
		0.02696	-1.44145e-10	-1.12945e-10	-3.91564e-10	-1.48638e-09
		0.02698	-1.42273e-10	-1.11073e-10	-3.91564e-10	-1.48638e-09
		0.027	-1.41649e-10	-1.10449e-10	-3.89692e-10	-1.48576e-09
		0.02702	-1.40401e-10	-1.09201e-10	-3.90004e-10	-1.48638e-09
		0.02704	-1.39153e-10	-1.06705e-10	-3.90004e-10	-1.48638e-09
		0.02706	-1.40401e-10	-1.04833e-10	-3.90004e-10	-1.48825e-09
		0.02708	-1.39777e-10	-1.04209e-10	-3.91252e-10	-1.4895e-09
		0.0271	-1.40401e-10	-1.03585e-10	-3.91876e-10	-1.49137e-09
		0.02712	-1.39153e-10	-1.04833e-10	-3.92188e-10	-1.492e-09
		0.02714	-1.37905e-10	-1.06081e-10	-3.93748e-10	-1.49325e-09
		0.02716	-1.36033e-10	-1.08577e-10	-3.93748e-10	-1.49325e-09
		0.02718	-1.34785e-10	-1.09201e-10	-3.9406e-10	-1.49512e-09
		0.0272	-1.35409e-10	-1.11073e-10	-3.93124e-10	-1.49449e-09
		0.02722	-1.35409e-10	-1.11073e-10	-3.92188e-10	-1.49325e-09
		0.02724	-1.36033e-10	-1.12945e-10	-3.9094e-10	-1.49262e-09
		0.02726	-1.36033e-10	-1.11697e-10	-3.90316e-10	-1.4895e-09
		0.02728	-1.36033e-10	-1.14193e-10	-3.89068e-10	-1.48825e-09
		0.0273	-1.36657e-10	-1.13569e-10	-3.88756e-10	-1.48701e-09
		0.02732	-1.38529e-10	-1.13569e-10	-3.90004e-10	-1.48701e-09
		0.02734	-1.38529e-10	-1.11697e-10	-3.91252e-10	-1.48701e-09
		0.02736	-1.37281e-10	-1.11697e-10	-3.93436e-10	-1.48825e-09
		0.02738	-1.36657e-10	-1.08577e-10	-3.9406e-10	-1.492e-09
		0.0274	-1.38529e-10	-1.09201e-10	-3.9406e-10	-1.49449e-09
		0.02742	-1.38529e-10	-1.08577e-10	-3.93748e-10	-1.49637e-09
		0.02744	-1.37281e-10	-1.09201e-10	-3.925e-10	-1.49824e-09
		0.02746	-1.39153e-10	-1.09201e-10	-3.91564e-10	-1.49824e-09
		0.02748	-1.39153e-10	-1.11073e-10	-3.91564e-10	-1.49824e-09
		0.0275	-1.40401e-10	-1.09825e-10	-3.91252e-10	-1.49824e-09
		0.02752	-1.39153e-10	-1.10449e-10	-3.93124e-10	-1.49512e-09
		0.02754	-1.39777e-10	-1.10449e-10	-3.93748e-10	-1.49387e-09
		0.02756	-1.41025e-10	-1.08577e-10	-3.9406e-10	-1.49387e-09
		0.02758	-1.44145e-10	-1.08577e-10	-3.93748e-10	-1.49325e-09
		0.0276	-1.47265e-10	-1.08577e-10	-3.93124e-10	-1.492e-09
		0.02762	-1.49761e-10	-1.07329e-10	-3.92812e-10	-1.492e-09
		0.02764	-1.49761e-10	-1.07953e-10	-3.925e-10	-1.49387e-09
		0.02766	-1.49761e-10	-1.07953e-10	-3.91876e-10	-1.49387e-09
		0.02768	-1.46017e-10	-1.07329e-10	-3.90628e-10	-1.49449e-09
		0.0277	-1.43521e-10	-1.07329e-10	-3.89692e-10	-1.49449e-09
		0.02772	-1.41649e-10	-1.06081e-10	-3.89692e-10	-1.49449e-09
		0.02774	-1.41025e-10	-1.06081e-10	-3.89692e-10	-1.49387e-09
		0.02776	-1.41025e-10	-1.07953e-10	-3.88132e-10	-1.49325e-09
		0.02778	-1.41649e-10	-1.07329e-10	-3.88444e-10	-1.492e-09
		0.0278	-1.42273e-10	-1.09201e-10	-3.88444e-10	-1.49013e-09
		0.02782	-1.43521e-10	-1.09201e-10	-3.90628e-10	-1.49013e-09
		0.02784	-1.44145e-10	-1.11073e-10	-3.93124e-10	-1.49075e-09
		0.02786	-1.46017e-10	-1.09825e-10	-3.94372e-10	-1.49075e-09
		0.02788	-1.45393e-10	-1.08577e-10	-3.9562e-10	-1.48888e-09
		0.0279	-1.45393e-10	-1.09201e-10	-3.96868e-10	-1.4895e-09
		0.02792	-1.44769e-10	-1.09201e-10	-3.98116e-10	-1.48825e-09
		0.02794	-1.45393e-10	-1.09201e-10	-3.9718e-10	-1.48638e-09
		0.02796	-1.45393e-10	-1.07329e-10	-3.98116e-10	-1.48701e-09
		0.02798	-1.44145e-10	-1.07953e-10	-3.9718e-10	-1.48825e-09
		0.028	-1.46641e-10	-1.07953e-10	-3.9562e-10	-1.49075e-09
		0.02802	-1.46017e-10	-1.09201e-10	-3.96868e-10	-1.492e-09
		0.02804	-1.47265e-10	-1.09201e-10	-3.9562e-10	-1.49387e-09
		0.02806	-1.48513e-10	-1.08577e-10	-3.9562e-10	-1.49262e-09
		0.02808	-1.50385e-10	-1.09201e-10	-3.93748e-10	-1.49325e-09
		0.0281	-1.51009e-10	-1.08577e-10	-3.93436e-10	-1.49325e-09
		0.02812	-1.50385e-10	-1.09201e-10	-3.93436e-10	-1.49449e-09
		0.02814	-1.49761e-10	-1.06081e-10	-3.93124e-10	-1.49387e-09
		0.02816	-1.48513e-10	-1.06705e-10	-3.93748e-10	-1.49449e-09
		0.02818	-1.46641e-10	-1.07329e-10	-3.94372e-10	-1.49325e-09
		0.0282	-1.44145e-10	-1.05457e-10	-3.9406e-10	-1.49387e-09
		0.02822	-1.44145e-10	-1.06705e-10	-3.9406e-10	-1.49262e-09
		0.02824	-1.41025e-10	-1.05457e-10	-3.9406e-10	-1.49387e-09
		0.02826	-1.41649e-10	-1.06705e-10	-3.92812e-10	-1.49325e-09
		0.02828	-1.43521e-10	-1.08577e-10	-3.91564e-10	-1.49325e-09
		0.0283	-1.42273e-10	-1.08577e-10	-3.90628e-10	-1.49075e-09
		0.02832	-1.43521e-10	-1.09201e-10	-3.89692e-10	-1.49013e-09
		0.02834	-1.43521e-10	-1.09825e-10	-3.89692e-10	-1.4895e-09
		0.02836	-1.42273e-10	-1.10449e-10	-3.89068e-10	-1.49013e-09
		0.02838	-1.41649e-10	-1.09201e-10	-3.88756e-10	-1.49013e-09
		0.0284	-1.42273e-10	-1.09201e-10	-3.89692e-10	-1.49137e-09
		0.02842	-1.44769e-10	-1.07953e-10	-3.89692e-10	-1.49075e-09
		0.02844	-1.45393e-10	-1.05457e-10	-3.89692e-10	-1.49137e-09
		0.02846	-1.46017e-10	-1.05457e-10	-3.90316e-10	-1.49013e-09
		0.02848	-1.47265e-10	-1.04833e-10	-3.92188e-10	-1.4895e-09
		0.0285	-1.45393e-10	-1.06081e-10	-3.93124e-10	-1.49137e-09
		0.02852	-1.44769e-10	-1.05457e-10	-3.93124e-10	-1.49013e-09
		0.02854	-1.42897e-10	-1.04209e-10	-3.9406e-10	-1.49137e-09
		0.02856	-1.44145e-10	-1.04209e-10	-3.94684e-10	-1.4895e-09
		0.02858	-1.44145e-10	-1.03585e-10	-3.94372e-10	-1.49075e-09
		0.0286	-1.44145e-10	-1.03585e-10	-3.9406e-10	-1.4895e-09
		0.02862	-1.44145e-10	-1.04209e-10	-3.93124e-10	-1.48701e-09
		0.02864	-1.44145e-10	-1.05457e-10	-3.91876e-10	-1.48763e-09
		0.02866	-1.43521e-10	-1.06705e-10	-3.91252e-10	-1.48701e-09
		0.02868	-1.44145e-10	-1.05457e-10	-3.91564e-10	-1.48825e-09
		0.0287	-1.41649e-10	-1.06081e-10	-3.9094e-10	-1.49075e-09
		0.02872	-1.42273e-10	-1.04833e-10	-3.90628e-10	-1.49262e-09
		0.02874	-1.42273e-10	-1.04209e-10	-3.89692e-10	-1.49449e-09
		0.02876	-1.44145e-10	-1.06081e-10	-3.89068e-10	-1.49699e-09
		0.02878	-1.42897e-10	-1.05457e-10	-3.8938e-10	-1.49574e-09
		0.0288	-1.43521e-10	-1.07953e-10	-3.89692e-10	-1.49512e-09
		0.02882	-1.41649e-10	-1.09201e-10	-3.90628e-10	-1.49512e-09
		0.02884	-1.42273e-10	-1.09201e-10	-3.92188e-10	-1.49449e-09
		0.02886	-1.41649e-10	-1.11073e-10	-3.92812e-10	-1.49325e-09
		0.02888	-1.40401e-10	-1.09825e-10	-3.93124e-10	-1.49512e-09
		0.0289	-1.40401e-10	-1.09201e-10	-3.93124e-10	-1.49325e-09
		0.02892	-1.40401e-10	-1.09201e-10	-3.93436e-10	-1.49262e-09
		0.02894	-1.40401e-10	-1.08577e-10	-3.9406e-10	-1.49262e-09
		0.02896	-1.39777e-10	-1.09825e-10	-3.93748e-10	-1.49013e-09
		0.02898	-1.40401e-10	-1.10449e-10	-3.94372e-10	-1.48888e-09
		0.029	-1.40401e-10	-1.09201e-10	-3.94684e-10	-1.48763e-09
		0.02902	-1.38529e-10	-1.07329e-10	-3.94996e-10	-1.48763e-09
		0.02904	-1.39153e-10	-1.05457e-10	-3.96556e-10	-1.48763e-09
		0.02906	-1.40401e-10	-1.03585e-10	-3.97804e-10	-1.48825e-09
		0.02908	-1.41025e-10	-1.02337e-10	-3.97804e-10	-1.48888e-09
		0.0291	-1.41649e-10	-1.01713e-10	-3.98116e-10	-1.492e-09
		0.02912	-1.44145e-10	-1.02337e-10	-3.9718e-10	-1.49137e-09
		0.02914	-1.41649e-10	-1.02961e-10	-3.9562e-10	-1.49325e-09
		0.02916	-1.42897e-10	-1.04833e-10	-3.94372e-10	-1.49262e-09
		0.02918	-1.40401e-10	-1.07953e-10	-3.92812e-10	-1.49387e-09
		0.0292	-1.38529e-10	-1.09201e-10	-3.91252e-10	-1.49387e-09
		0.02922	-1.37905e-10	-1.08577e-10	-3.89692e-10	-1.49387e-09
		0.02924	-1.37905e-10	-1.09825e-10	-3.90316e-10	-1.49387e-09
		0.02926	-1.39153e-10	-1.10449e-10	-3.89692e-10	-1.49387e-09
		0.02928	-1.39153e-10	-1.09201e-10	-3.89692e-10	-1.49325e-09
		0.0293	-1.39777e-10	-1.08577e-10	-3.89692e-10	-1.492e-09
		0.02932	-1.39777e-10	-1.07953e-10	-3.9094e-10	-1.49137e-09
		0.02934	-1.37281e-10	-1.08577e-10	-3.92812e-10	-1.4895e-09
		0.02936	-1.37905e-10	-1.07953e-10	-3.93748e-10	-1.48825e-09
		0.02938	-1.39153e-10	-1.06081e-10	-3.95308e-10	-1.49013e-09
		0.0294	-1.37905e-10	-1.07329e-10	-3.97492e-10	-1.49013e-09
		0.02942	-1.38529e-10	-1.06081e-10	-3.99052e-10	-1.49262e-09
		0.02944	-1.39777e-10	-1.06081e-10	-3.99364e-10	-1.49262e-09
		0.02946	-1.39777e-10	-1.07953e-10	-3.9874e-10	-1.49325e-09
		0.02948	-1.39153e-10	-1.07953e-10	-3.97492e-10	-1.492e-09
		0.0295	-1.37905e-10	-1.07953e-10	-3.96556e-10	-1.492e-09
		0.02952	-1.37281e-10	-1.08577e-10	-3.96556e-10	-1.49013e-09
		0.02954	-1.37281e-10	-1.10449e-10	-3.95932e-10	-1.492e-09
		0.02956	-1.39153e-10	-1.09201e-10	-3.95308e-10	-1.49262e-09
		0.02958	-1.39777e-10	-1.10449e-10	-3.96244e-10	-1.49262e-09
		0.0296	-1.40401e-10	-1.11073e-10	-3.96556e-10	-1.49325e-09
		0.02962	-1.42273e-10	-1.09825e-10	-3.9562e-10	-1.49262e-09
		0.02964	-1.42273e-10	-1.07953e-10	-3.9562e-10	-1.49325e-09
		0.02966	-1.44145e-10	-1.06705e-10	-3.95308e-10	-1.49262e-09
		0.02968	-1.44145e-10	-1.05457e-10	-3.93748e-10	-1.49449e-09
		0.0297	-1.44145e-10	-1.04209e-10	-3.925e-10	-1.49449e-09
		0.02972	-1.45393e-10	-1.04209e-10	-3.91564e-10	-1.49512e-09
		0.02974	-1.44769e-10	-1.03585e-10	-3.9094e-10	-1.49574e-09
		0.02976	-1.44769e-10	-1.05457e-10	-3.89692e-10	-1.49325e-09
		0.02978	-1.44769e-10	-1.06081e-10	-3.8938e-10	-1.49449e-09
		0.0298	-1.44145e-10	-1.03585e-10	-3.8938e-10	-1.49262e-09
		0.02982	-1.41649e-10	-1.04209e-10	-3.89692e-10	-1.4895e-09
		0.02984	-1.41649e-10	-1.03585e-10	-3.90628e-10	-1.48825e-09
		0.02986	-1.41025e-10	-1.02961e-10	-3.91876e-10	-1.48888e-09
		0.02988	-1.39777e-10	-1.02337e-10	-3.92188e-10	-1.49013e-09
		0.0299	-1.38529e-10	-1.02961e-10	-3.93124e-10	-1.49325e-09
		0.02992	-1.40401e-10	-1.02961e-10	-3.9406e-10	-1.49262e-09
		0.02994	-1.39777e-10	-1.04833e-10	-3.94372e-10	-1.49512e-09
		0.02996	-1.39777e-10	-1.04833e-10	-3.94372e-10	-1.49512e-09
		0.02998	-1.39777e-10	-1.05457e-10	-3.95308e-10	-1.49574e-09
		0.03	-1.39777e-10	-1.06705e-10	-3.95308e-10	-1.49574e-09
		0.03002	-1.37905e-10	-1.07953e-10	-3.9562e-10	-1.49637e-09
		0.03004	-1.36033e-10	-1.08577e-10	-3.95308e-10	-1.49637e-09
		0.03006	-1.36657e-10	-1.09201e-10	-3.95308e-10	-1.49574e-09
		0.03008	-1.33537e-10	-1.09825e-10	-3.94684e-10	-1.49449e-09
		0.0301	-1.36033e-10	-1.09201e-10	-3.93748e-10	-1.49387e-09
		0.03012	-1.35409e-10	-1.07953e-10	-3.9406e-10	-1.49325e-09
		0.03014	-1.35409e-10	-1.06705e-10	-3.9406e-10	-1.49325e-09
		0.03016	-1.35409e-10	-1.06705e-10	-3.94372e-10	-1.49262e-09
		0.03018	-1.36657e-10	-1.05457e-10	-3.94372e-10	-1.49449e-09
		0.0302	-1.37281e-10	-1.02961e-10	-3.9406e-10	-1.49387e-09
		0.03022	-1.38529e-10	-1.01713e-10	-3.93124e-10	-1.49512e-09
		0.03024	-1.38529e-10	-1.03585e-10	-3.92188e-10	-1.49512e-09
		0.03026	-1.39153e-10	-1.04833e-10	-3.9094e-10	-1.49637e-09
		0.03028	-1.40401e-10	-1.04209e-10	-3.90004e-10	-1.49637e-09
		0.0303	-1.39153e-10	-1.05457e-10	-3.8938e-10	-1.49512e-09
		0.03032	-1.39153e-10	-1.04833e-10	-3.90316e-10	-1.49387e-09
		0.03034	-1.38529e-10	-1.05457e-10	-3.91876e-10	-1.49637e-09
		0.03036	-1.38529e-10	-1.05457e-10	-3.93436e-10	-1.49574e-09
		0.03038	-1.39153e-10	-1.06081e-10	-3.9406e-10	-1.49699e-09
		0.0304	-1.39153e-10	-1.06705e-10	-3.9406e-10	-1.49574e-09
		0.03042	-1.40401e-10	-1.08577e-10	-3.93436e-10	-1.49512e-09
		0.03044	-1.40401e-10	-1.08577e-10	-3.92188e-10	-1.49449e-09
		0.03046	-1.39777e-10	-1.07953e-10	-3.92188e-10	-1.49449e-09
		0.03048	-1.38529e-10	-1.07329e-10	-3.9094e-10	-1.49325e-09
		0.0305	-1.39153e-10	-1.07953e-10	-3.91564e-10	-1.49262e-09
		0.03052	-1.39153e-10	-1.06081e-10	-3.92188e-10	-1.49013e-09
		0.03054	-1.38529e-10	-1.03585e-10	-3.91876e-10	-1.492e-09
		0.03056	-1.39153e-10	-1.03585e-10	-3.92188e-10	-1.492e-09
		0.03058	-1.38529e-10	-1.03585e-10	-3.925e-10	-1.49262e-09
		0.0306	-1.40401e-10	-1.05457e-10	-3.925e-10	-1.49387e-09
		0.03062	-1.39777e-10	-1.05457e-10	-3.92812e-10	-1.49325e-09
		0.03064	-1.41649e-10	-1.06081e-10	-3.93436e-10	-1.49262e-09
		0.03066	-1.41025e-10	-1.08577e-10	-3.93436e-10	-1.49262e-09
		0.03068	-1.39777e-10	-1.09201e-10	-3.94684e-10	-1.492e-09
		0.0307	-1.39777e-10	-1.09825e-10	-3.94996e-10	-1.49325e-09
		0.03072	-1.39777e-10	-1.06705e-10	-3.96244e-10	-1.49262e-09
		0.03074	-1.40401e-10	-1.06081e-10	-3.96556e-10	-1.49387e-09
		0.03076	-1.39777e-10	-1.04833e-10	-3.9718e-10	-1.49325e-09
		0.03078	-1.41025e-10	-1.03585e-10	-3.96244e-10	-1.49449e-09
		0.0308	-1.42897e-10	-1.02337e-10	-3.9562e-10	-1.49387e-09
		0.03082	-1.44145e-10	-1.04209e-10	-3.9562e-10	-1.49449e-09
		0.03084	-1.42273e-10	-1.04833e-10	-3.9562e-10	-1.49325e-09
		0.03086	-1.43521e-10	-1.05457e-10	-3.96556e-10	-1.49262e-09
		0.03088	-1.42273e-10	-1.06705e-10	-3.9562e-10	-1.49137e-09
		0.0309	-1.41649e-10	-1.08577e-10	-3.95308e-10	-1.49262e-09
		0.03092	-1.41025e-10	-1.09825e-10	-3.94684e-10	-1.49449e-09
		0.03094	-1.40401e-10	-1.10449e-10	-3.93124e-10	-1.49512e-09
		0.03096	-1.41649e-10	-1.11697e-10	-3.92812e-10	-1.49637e-09
		0.03098	-1.42273e-10	-1.10449e-10	-3.91564e-10	-1.49824e-09
		0.031	-1.42273e-10	-1.08577e-10	-3.90628e-10	-1.49949e-09
		0.03102	-1.42273e-10	-1.07329e-10	-3.90628e-10	-1.49949e-09
		0.03104	-1.42273e-10	-1.06081e-10	-3.90628e-10	-1.49949e-09
		0.03106	-1.40401e-10	-1.06705e-10	-3.90628e-10	-1.49949e-09
		0.03108	-1.40401e-10	-1.07329e-10	-3.9094e-10	-1.49886e-09
		0.0311	-1.40401e-10	-1.07953e-10	-3.92188e-10	-1.49761e-09
		0.03112	-1.37905e-10	-1.07953e-10	-3.92812e-10	-1.49637e-09
		0.03114	-1.37905e-10	-1.09825e-10	-3.9406e-10	-1.49512e-09
		0.03116	-1.36033e-10	-1.10449e-10	-3.94372e-10	-1.49325e-09
		0.03118	-1.34161e-10	-1.07953e-10	-3.94372e-10	-1.49137e-09
		0.0312	-1.33537e-10	-1.08577e-10	-3.94684e-10	-1.49075e-09
		0.03122	-1.32289e-10	-1.08577e-10	-3.93436e-10	-1.48825e-09
		0.03124	-1.34785e-10	-1.07329e-10	-3.91876e-10	-1.49013e-09
		0.03126	-1.37281e-10	-1.07329e-10	-3.91876e-10	-1.492e-09
		0.03128	-1.39153e-10	-1.06081e-10	-3.91252e-10	-1.49387e-09
		0.0313	-1.41025e-10	-1.07329e-10	-3.91564e-10	-1.49574e-09
		0.03132	-1.41649e-10	-1.06705e-10	-3.925e-10	-1.49637e-09
		0.03134	-1.41649e-10	-1.08577e-10	-3.925e-10	-1.49886e-09
		0.03136	-1.41649e-10	-1.07953e-10	-3.92812e-10	-1.50573e-09
		0.03138	-1.39777e-10	-1.09201e-10	-3.92188e-10	-1.51259e-09
		0.0314	-1.38529e-10	-1.07953e-10	-3.91876e-10	-1.51945e-09
		0.03142	-1.36657e-10	-1.09201e-10	-3.925e-10	-1.52694e-09
		0.03144	-1.34161e-10	-1.07953e-10	-3.92812e-10	-1.53256e-09
		0.03146	-1.34785e-10	-1.07329e-10	-3.93748e-10	-1.53443e-09
		0.03148	-1.33537e-10	-1.06705e-10	-3.93748e-10	-1.53505e-09
		0.0315	-1.34161e-10	-1.05457e-10	-3.9406e-10	-1.53568e-09
		0.03152	-1.37281e-10	-1.06081e-10	-3.925e-10	-1.53443e-09
		0.03154	-1.38529e-10	-1.05457e-10	-3.93124e-10	-1.53131e-09
		0.03156	-1.37905e-10	-1.04209e-10	-3.93748e-10	-1.52881e-09
		0.03158	-1.38529e-10	-1.05457e-10	-3.92812e-10	-1.52569e-09
		0.0316	-1.40401e-10	-1.06705e-10	-3.92812e-10	-1.5232e-09
		0.03162	-1.38529e-10	-1.07329e-10	-3.93124e-10	-1.52008e-09
		0.03164	-1.39153e-10	-1.07953e-10	-3.925e-10	-1.51633e-09
		0.03166	-1.39153e-10	-1.06705e-10	-3.91876e-10	-1.51321e-09
		0.03168	-1.36657e-10	-1.06081e-10	-3.92188e-10	-1.5076e-09
		0.0317	-1.37905e-10	-1.03585e-10	-3.91564e-10	-1.50697e-09
		0.03172	-1.37905e-10	-1.04209e-10	-3.91252e-10	-1.50448e-09
		0.03174	-1.37281e-10	-1.03585e-10	-3.92188e-10	-1.50385e-09
		0.03176	-1.37905e-10	-1.04209e-10	-3.925e-10	-1.50323e-09
		0.03178	-1.36657e-10	-1.04833e-10	-3.93124e-10	-1.50136e-09
		0.0318	-1.37281e-10	-1.06705e-10	-3.93436e-10	-1.50073e-09
		0.03182	-1.37281e-10	-1.04209e-10	-3.9406e-10	-1.49949e-09
		0.03184	-1.39153e-10	-1.04209e-10	-3.9406e-10	-1.49699e-09
		0.03186	-1.37905e-10	-1.04833e-10	-3.93748e-10	-1.49761e-09
		0.03188	-1.37281e-10	-1.06081e-10	-3.93436e-10	-1.49574e-09
		0.0319	-1.37281e-10	-1.07953e-10	-3.92812e-10	-1.49512e-09
		0.03192	-1.36033e-10	-1.09825e-10	-3.92188e-10	-1.49449e-09
		0.03194	-1.36033e-10	-1.11697e-10	-3.92812e-10	-1.49512e-09
		0.03196	-1.36033e-10	-1.14193e-10	-3.93436e-10	-1.49574e-09
		0.03198	-1.36033e-10	-1.12321e-10	-3.9406e-10	-1.49512e-09
		0.032	-1.36657e-10	-1.09825e-10	-3.94996e-10	-1.49574e-09
		0.03202	-1.34785e-10	-1.09825e-10	-3.9562e-10	-1.49387e-09
		0.03204	-1.34161e-10	-1.09825e-10	-3.96868e-10	-1.49262e-09
		0.03206	-1.31665e-10	-1.08577e-10	-3.97804e-10	-1.49013e-09
		0.03208	-1.31665e-10	-1.09201e-10	-3.97804e-10	-1.49013e-09
		0.0321	-1.34161e-10	-1.08577e-10	-3.96868e-10	-1.49137e-09
		0.03212	-1.37281e-10	-1.09825e-10	-3.96244e-10	-1.49137e-09
		0.03214	-1.38529e-10	-1.09201e-10	-3.9562e-10	-1.49137e-09
		0.03216	-1.39153e-10	-1.08577e-10	-3.93748e-10	-1.49137e-09
		0.03218	-1.39153e-10	-1.06705e-10	-3.94996e-10	-1.49262e-09
		0.0322	-1.39777e-10	-1.06081e-10	-3.94684e-10	-1.49325e-09
		0.03222	-1.37905e-10	-1.05457e-10	-3.9406e-10	-1.49262e-09
		0.03224	-1.37281e-10	-1.04833e-10	-3.94996e-10	-1.49325e-09
		0.03226	-1.37281e-10	-1.04833e-10	-3.96244e-10	-1.492e-09
		0.03228	-1.36033e-10	-1.05457e-10	-3.97492e-10	-1.49449e-09
		0.0323	-1.35409e-10	-1.05457e-10	-3.98116e-10	-1.49637e-09
		0.03232	-1.36033e-10	-1.05457e-10	-3.98116e-10	-1.49637e-09
		0.03234	-1.35409e-10	-1.06705e-10	-3.98116e-10	-1.49699e-09
		0.03236	-1.36033e-10	-1.06081e-10	-3.97804e-10	-1.50198e-09
		0.03238	-1.34785e-10	-1.06705e-10	-3.96244e-10	-1.50697e-09
		0.0324	-1.35409e-10	-1.07329e-10	-3.95308e-10	-1.51259e-09
		0.03242	-1.36657e-10	-1.08577e-10	-3.95308e-10	-1.51945e-09
		0.03244	-1.37281e-10	-1.07953e-10	-3.9562e-10	-1.52694e-09
		0.03246	-1.37905e-10	-1.07953e-10	-3.9562e-10	-1.53256e-09
		0.03248	-1.37905e-10	-1.07329e-10	-3.9562e-10	-1.53755e-09
		0.0325	-1.37905e-10	-1.06705e-10	-3.9562e-10	-1.53755e-09
		0.03252	-1.36657e-10	-1.06705e-10	-3.94996e-10	-1.53942e-09
		0.03254	-1.36657e-10	-1.05457e-10	-3.93748e-10	-1.53942e-09
		0.03256	-1.36657e-10	-1.04209e-10	-3.92188e-10	-1.5388e-09
		0.03258	-1.35409e-10	-1.04209e-10	-3.91252e-10	-1.53755e-09
		0.0326	-1.35409e-10	-1.04833e-10	-3.91876e-10	-1.53568e-09
		0.03262	-1.35409e-10	-1.04833e-10	-3.91876e-10	-1.53318e-09
		0.03264	-1.36657e-10	-1.06081e-10	-3.92812e-10	-1.53006e-09
		0.03266	-1.37905e-10	-1.05457e-10	-3.93436e-10	-1.52757e-09
		0.03268	-1.35409e-10	-1.06705e-10	-3.9406e-10	-1.52507e-09
		0.0327	-1.35409e-10	-1.07953e-10	-3.9406e-10	-1.51945e-09
		0.03272	-1.34785e-10	-1.07329e-10	-3.9406e-10	-1.51696e-09
		0.03274	-1.36657e-10	-1.08577e-10	-3.93748e-10	-1.51446e-09
		0.03276	-1.35409e-10	-1.08577e-10	-3.9406e-10	-1.51509e-09
		0.03278	-1.35409e-10	-1.09201e-10	-3.94372e-10	-1.51321e-09
		0.0328	-1.36033e-10	-1.06081e-10	-3.93748e-10	-1.51259e-09
		0.03282	-1.36657e-10	-1.05457e-10	-3.92188e-10	-1.50822e-09
		0.03284	-1.37281e-10	-1.02961e-10	-3.91876e-10	-1.50635e-09
		0.03286	-1.38529e-10	-1.03585e-10	-3.9094e-10	-1.50573e-09
		0.03288	-1.39777e-10	-1.05457e-10	-3.91252e-10	-1.50448e-09
		0.0329	-1.41025e-10	-1.06705e-10	-3.91252e-10	-1.50261e-09
		0.03292	-1.39777e-10	-1.07329e-10	-3.92188e-10	-1.50198e-09
		0.03294	-1.38529e-10	-1.09825e-10	-3.93436e-10	-1.50198e-09
		0.03296	-1.39777e-10	-1.09825e-10	-3.93748e-10	-1.50198e-09
		0.03298	-1.37905e-10	-1.07329e-10	-3.9406e-10	-1.49949e-09
		0.033	-1.36033e-10	-1.06705e-10	-3.9406e-10	-1.49761e-09
		0.03302	-1.34785e-10	-1.06081e-10	-3.9406e-10	-1.49574e-09
		0.03304	-1.33537e-10	-1.04833e-10	-3.93748e-10	-1.49325e-09
		0.03306	-1.34161e-10	-1.02337e-10	-3.93124e-10	-1.49325e-09
		0.03308	-1.34161e-10	-1.05457e-10	-3.92812e-10	-1.49325e-09
		0.0331	-1.34785e-10	-1.06081e-10	-3.925e-10	-1.49387e-09
		0.03312	-1.36657e-10	-1.07329e-10	-3.91252e-10	-1.49574e-09
		0.03314	-1.38529e-10	-1.08577e-10	-3.9094e-10	-1.49637e-09
		0.03316	-1.39153e-10	-1.07329e-10	-3.90628e-10	-1.49574e-09
		0.03318	-1.38529e-10	-1.08577e-10	-3.91564e-10	-1.49761e-09
		0.0332	-1.38529e-10	-1.07329e-10	-3.91252e-10	-1.49699e-09
		0.03322	-1.39777e-10	-1.07329e-10	-3.91252e-10	-1.49574e-09
		0.03324	-1.38529e-10	-1.06705e-10	-3.90316e-10	-1.49761e-09
		0.03326	-1.35409e-10	-1.05457e-10	-3.91252e-10	-1.49699e-09
		0.03328	-1.34785e-10	-1.05457e-10	-3.90316e-10	-1.49512e-09
		0.0333	-1.36657e-10	-1.03585e-10	-3.9094e-10	-1.49449e-09
		0.03332	-1.37281e-10	-1.03585e-10	-3.91876e-10	-1.49325e-09
		0.03334	-1.37281e-10	-1.03585e-10	-3.925e-10	-1.49013e-09
		0.03336	-1.38529e-10	-1.03585e-10	-3.9406e-10	-1.48888e-09
		0.03338	-1.37281e-10	-1.04209e-10	-3.94372e-10	-1.4895e-09
		0.0334	-1.39153e-10	-1.03585e-10	-3.94684e-10	-1.48825e-09
		0.03342	-1.35409e-10	-1.04833e-10	-3.94684e-10	-1.48763e-09
		0.03344	-1.34785e-10	-1.05457e-10	-3.93436e-10	-1.4895e-09
		0.03346	-1.34785e-10	-1.06081e-10	-3.93436e-10	-1.48888e-09
		0.03348	-1.36657e-10	-1.07953e-10	-3.925e-10	-1.49075e-09
		0.0335	-1.36033e-10	-1.06081e-10	-3.92188e-10	-1.49262e-09
		0.03352	-1.37905e-10	-1.06081e-10	-3.91876e-10	-1.49387e-09
		0.03354	-1.36657e-10	-1.04209e-10	-3.92188e-10	-1.492e-09
		0.03356	-1.35409e-10	-1.03585e-10	-3.93748e-10	-1.49013e-09
		0.03358	-1.37905e-10	-1.01713e-10	-3.94684e-10	-1.4895e-09
		0.0336	-1.36657e-10	-1.03585e-10	-3.96556e-10	-1.49013e-09
		0.03362	-1.37281e-10	-1.04833e-10	-3.96868e-10	-1.48888e-09
		0.03364	-1.36033e-10	-1.04833e-10	-3.97492e-10	-1.48825e-09
		0.03366	-1.36033e-10	-1.05457e-10	-3.97804e-10	-1.48701e-09
		0.03368	-1.35409e-10	-1.06081e-10	-3.9718e-10	-1.48825e-09
		0.0337	-1.35409e-10	-1.06705e-10	-3.9718e-10	-1.48763e-09
		0.03372	-1.36033e-10	-1.07329e-10	-3.96556e-10	-1.48825e-09
		0.03374	-1.36033e-10	-1.07953e-10	-3.96244e-10	-1.49075e-09
		0.03376	-1.37905e-10	-1.07953e-10	-3.96244e-10	-1.49013e-09
		0.03378	-1.36033e-10	-1.07953e-10	-3.9562e-10	-1.49137e-09
		0.0338	-1.37281e-10	-1.07329e-10	-3.9562e-10	-1.492e-09
		0.03382	-1.37281e-10	-1.07329e-10	-3.9406e-10	-1.49262e-09
		0.03384	-1.38529e-10	-1.06081e-10	-3.9406e-10	-1.49262e-09
		0.03386	-1.37281e-10	-1.05457e-10	-3.9406e-10	-1.49262e-09
		0.03388	-1.37281e-10	-1.04833e-10	-3.93436e-10	-1.492e-09
		0.0339	-1.37281e-10	-1.04209e-10	-3.925e-10	-1.492e-09
		0.03392	-1.38529e-10	-1.04209e-10	-3.925e-10	-1.49137e-09
		0.03394	-1.39153e-10	-1.06081e-10	-3.93124e-10	-1.49262e-09
		0.03396	-1.40401e-10	-1.06081e-10	-3.925e-10	-1.49387e-09
		0.03398	-1.39777e-10	-1.06081e-10	-3.93124e-10	-1.49449e-09
		0.034	-1.40401e-10	-1.06081e-10	-3.925e-10	-1.492e-09
		0.03402	-1.37905e-10	-1.07953e-10	-3.925e-10	-1.49137e-09
		0.03404	-1.37905e-10	-1.06081e-10	-3.91876e-10	-1.4895e-09
		0.03406	-1.37281e-10	-1.06081e-10	-3.93124e-10	-1.48825e-09
		0.03408	-1.36033e-10	-1.06081e-10	-3.93124e-10	-1.48763e-09
		0.0341	-1.36033e-10	-1.06081e-10	-3.93124e-10	-1.48888e-09
		0.03412	-1.36033e-10	-1.04209e-10	-3.93748e-10	-1.49325e-09
		0.03414	-1.36033e-10	-1.05457e-10	-3.9406e-10	-1.49449e-09
		0.03416	-1.36033e-10	-1.02961e-10	-3.93748e-10	-1.49574e-09
		0.03418	-1.36033e-10	-1.04209e-10	-3.93748e-10	-1.49574e-09
		0.0342	-1.34161e-10	-1.03585e-10	-3.93436e-10	-1.49387e-09
		0.03422	-1.32913e-10	-1.04209e-10	-3.93436e-10	-1.49325e-09
		0.03424	-1.33537e-10	-1.05457e-10	-3.9406e-10	-1.49262e-09
		0.03426	-1.32913e-10	-1.06081e-10	-3.93124e-10	-1.492e-09
		0.03428	-1.31041e-10	-1.07953e-10	-3.925e-10	-1.49075e-09
		0.0343	-1.31041e-10	-1.07953e-10	-3.93124e-10	-1.49262e-09
		0.03432	-1.33537e-10	-1.07953e-10	-3.93436e-10	-1.49325e-09
		0.03434	-1.33537e-10	-1.06705e-10	-3.93124e-10	-1.49325e-09
		0.03436	-1.34785e-10	-1.07329e-10	-3.9406e-10	-1.49325e-09
		0.03438	-1.34785e-10	-1.05457e-10	-3.94372e-10	-1.49387e-09
		0.0344	-1.34785e-10	-1.04833e-10	-3.95308e-10	-1.49449e-09
		0.03442	-1.32913e-10	-1.05457e-10	-3.94996e-10	-1.49449e-09
		0.03444	-1.33537e-10	-1.05457e-10	-3.94684e-10	-1.49512e-09
		0.03446	-1.32289e-10	-1.07329e-10	-3.93436e-10	-1.49637e-09
		0.03448	-1.35409e-10	-1.07329e-10	-3.93124e-10	-1.49574e-09
		0.0345	-1.37281e-10	-1.06705e-10	-3.93748e-10	-1.49449e-09
		0.03452	-1.37281e-10	-1.06705e-10	-3.9406e-10	-1.49325e-09
		0.03454	-1.38529e-10	-1.05457e-10	-3.96244e-10	-1.49013e-09
		0.03456	-1.41025e-10	-1.05457e-10	-3.96244e-10	-1.49013e-09
		0.03458	-1.40401e-10	-1.05457e-10	-3.96556e-10	-1.49013e-09
		0.0346	-1.41025e-10	-1.06705e-10	-3.96556e-10	-1.49075e-09
		0.03462	-1.40401e-10	-1.07329e-10	-3.9562e-10	-1.49137e-09
		0.03464	-1.40401e-10	-1.09201e-10	-3.94684e-10	-1.492e-09
		0.03466	-1.39153e-10	-1.09201e-10	-3.9406e-10	-1.49387e-09
		0.03468	-1.37905e-10	-1.08577e-10	-3.93436e-10	-1.49512e-09
		0.0347	-1.37281e-10	-1.08577e-10	-3.93748e-10	-1.49637e-09
		0.03472	-1.39153e-10	-1.07953e-10	-3.94372e-10	-1.49699e-09
		0.03474	-1.39777e-10	-1.09201e-10	-3.95308e-10	-1.49761e-09
		0.03476	-1.39777e-10	-1.07329e-10	-3.95308e-10	-1.49574e-09
		0.03478	-1.40401e-10	-1.11073e-10	-3.9562e-10	-1.49637e-09
		0.0348	-1.39153e-10	-1.11073e-10	-3.94996e-10	-1.49699e-09
		0.03482	-1.37281e-10	-1.09201e-10	-3.93748e-10	-1.49637e-09
		0.03484	-1.36033e-10	-1.09201e-10	-3.93748e-10	-1.49574e-09
		0.03486	-1.36033e-10	-1.07329e-10	-3.92812e-10	-1.49449e-09
		0.03488	-1.32913e-10	-1.04209e-10	-3.92812e-10	-1.49262e-09
		0.0349	-1.32913e-10	-1.02961e-10	-3.91876e-10	-1.49325e-09
		0.03492	-1.32289e-10	-1.04209e-10	-3.92188e-10	-1.49137e-09
		0.03494	-1.34785e-10	-1.04833e-10	-3.92812e-10	-1.49325e-09
		0.03496	-1.36033e-10	-1.04833e-10	-3.91876e-10	-1.49262e-09
		0.03498	-1.36033e-10	-1.06705e-10	-3.92188e-10	-1.49262e-09
		0.035	-1.36033e-10	-1.06705e-10	-3.92812e-10	-1.49512e-09
		0.03502	-1.35409e-10	-1.04833e-10	-3.93124e-10	-1.49449e-09
		0.03504	-1.36657e-10	-1.06081e-10	-3.92812e-10	-1.49262e-09
		0.03506	-1.36033e-10	-1.04833e-10	-3.925e-10	-1.49325e-09
		0.03508	-1.37281e-10	-1.05457e-10	-3.925e-10	-1.49325e-09
		0.0351	-1.39153e-10	-1.05457e-10	-3.92188e-10	-1.49449e-09
		0.03512	-1.39777e-10	-1.03585e-10	-3.91876e-10	-1.49325e-09
		0.03514	-1.39777e-10	-1.04833e-10	-3.91564e-10	-1.49325e-09
		0.03516	-1.39777e-10	-1.04209e-10	-3.91876e-10	-1.49262e-09
		0.03518	-1.41025e-10	-1.04833e-10	-3.92812e-10	-1.492e-09
		0.0352	-1.41649e-10	-1.06081e-10	-3.93436e-10	-1.49075e-09
		0.03522	-1.39153e-10	-1.06081e-10	-3.9406e-10	-1.4895e-09
		0.03524	-1.39153e-10	-1.05457e-10	-3.95308e-10	-1.48888e-09
		0.03526	-1.36657e-10	-1.05457e-10	-3.94684e-10	-1.48888e-09
		0.03528	-1.34785e-10	-1.04209e-10	-3.95308e-10	-1.49013e-09
		0.0353	-1.34785e-10	-1.04833e-10	-3.94684e-10	-1.492e-09
		0.03532	-1.35409e-10	-1.04209e-10	-3.94996e-10	-1.492e-09
		0.03534	-1.36033e-10	-1.03585e-10	-3.95308e-10	-1.492e-09
		0.03536	-1.34785e-10	-1.02337e-10	-3.9562e-10	-1.4895e-09
		0.03538	-1.36033e-10	-1.03585e-10	-3.95308e-10	-1.48825e-09
		0.0354	-1.36657e-10	-1.04833e-10	-3.94996e-10	-1.48888e-09
		0.03542	-1.35409e-10	-1.04833e-10	-3.94372e-10	-1.48888e-09
		0.03544	-1.36033e-10	-1.06081e-10	-3.94372e-10	-1.48888e-09
		0.03546	-1.36657e-10	-1.06705e-10	-3.9406e-10	-1.49075e-09
		0.03548	-1.35409e-10	-1.07953e-10	-3.9406e-10	-1.49013e-09
		0.0355	-1.36657e-10	-1.07329e-10	-3.94996e-10	-1.49013e-09
		0.03552	-1.36033e-10	-1.07329e-10	-3.9562e-10	-1.49262e-09
		0.03554	-1.37905e-10	-1.06705e-10	-3.96556e-10	-1.49262e-09
		0.03556	-1.39777e-10	-1.03585e-10	-3.96556e-10	-1.492e-09
		0.03558	-1.41649e-10	-1.02337e-10	-3.96868e-10	-1.49262e-09
		0.0356	-1.42273e-10	-1.01713e-10	-3.96868e-10	-1.49137e-09
		0.03562	-1.43521e-10	-1.01713e-10	-3.9562e-10	-1.49013e-09
		0.03564	-1.42273e-10	-1.02961e-10	-3.94372e-10	-1.49137e-09
		0.03566	-1.41649e-10	-1.03585e-10	-3.93124e-10	-1.49137e-09
		0.03568	-1.40401e-10	-1.04833e-10	-3.93436e-10	-1.49262e-09
		0.0357	-1.38529e-10	-1.04833e-10	-3.93748e-10	-1.49137e-09
		0.03572	-1.37905e-10	-1.07329e-10	-3.93436e-10	-1.49137e-09
		0.03574	-1.36657e-10	-1.08577e-10	-3.93748e-10	-1.49075e-09
		0.03576	-1.35409e-10	-1.06705e-10	-3.94684e-10	-1.49137e-09
		0.03578	-1.34161e-10	-1.06081e-10	-3.94996e-10	-1.49075e-09
		0.0358	-1.34785e-10	-1.04833e-10	-3.94996e-10	-1.48888e-09
		0.03582	-1.34161e-10	-1.04833e-10	-3.95308e-10	-1.4895e-09
		0.03584	-1.34785e-10	-1.04833e-10	-3.93436e-10	-1.4895e-09
		0.03586	-1.35409e-10	-1.04833e-10	-3.92188e-10	-1.48825e-09
		0.03588	-1.36033e-10	-1.06081e-10	-3.91876e-10	-1.48888e-09
		0.0359	-1.36657e-10	-1.07329e-10	-3.92188e-10	-1.48763e-09
		0.03592	-1.36033e-10	-1.08577e-10	-3.91564e-10	-1.48888e-09
		0.03594	-1.37281e-10	-1.06081e-10	-3.93124e-10	-1.4895e-09
		0.03596	-1.38529e-10	-1.07953e-10	-3.93748e-10	-1.49137e-09
		0.03598	-1.39777e-10	-1.06705e-10	-3.94372e-10	-1.49325e-09
		0.036	-1.39777e-10	-1.05457e-10	-3.96556e-10	-1.49449e-09
		0.03602	-1.40401e-10	-1.04833e-10	-3.96868e-10	-1.49512e-09
		0.03604	-1.41025e-10	-1.04209e-10	-3.9718e-10	-1.49574e-09
		0.03606	-1.40401e-10	-1.03585e-10	-3.9562e-10	-1.49512e-09
		0.03608	-1.39777e-10	-1.04209e-10	-3.94684e-10	-1.49325e-09
		0.0361	-1.37281e-10	-1.04833e-10	-3.9406e-10	-1.492e-09
		0.03612	-1.37281e-10	-1.04833e-10	-3.94684e-10	-1.492e-09
		0.03614	-1.34785e-10	-1.06081e-10	-3.94372e-10	-1.49262e-09
		0.03616	-1.32289e-10	-1.06705e-10	-3.95308e-10	-1.49512e-09
		0.03618	-1.32289e-10	-1.07329e-10	-3.94372e-10	-1.49449e-09
		0.0362	-1.33537e-10	-1.07329e-10	-3.9406e-10	-1.49387e-09
		0.03622	-1.36033e-10	-1.07953e-10	-3.93748e-10	-1.49325e-09
		0.03624	-1.37281e-10	-1.08577e-10	-3.93748e-10	-1.49137e-09
		0.03626	-1.39777e-10	-1.07953e-10	-3.94372e-10	-1.4895e-09
		0.03628	-1.42273e-10	-1.07329e-10	-3.94684e-10	-1.48763e-09
		0.0363	-1.43521e-10	-1.06705e-10	-3.94684e-10	-1.48763e-09
		0.03632	-1.43521e-10	-1.05457e-10	-3.94996e-10	-1.48638e-09
		0.03634	-1.43521e-10	-1.04209e-10	-3.9406e-10	-1.48638e-09
		0.03636	-1.42897e-10	-1.06081e-10	-3.9406e-10	-1.48701e-09
		0.03638	-1.42273e-10	-1.05457e-10	-3.93124e-10	-1.48763e-09
		0.0364	-1.41025e-10	-1.05457e-10	-3.925e-10	-1.48638e-09
		0.03642	-1.41649e-10	-1.06081e-10	-3.93124e-10	-1.48513e-09
		0.03644	-1.39777e-10	-1.04833e-10	-3.925e-10	-1.48513e-09
		0.03646	-1.39153e-10	-1.07953e-10	-3.92812e-10	-1.48451e-09
		0.03648	-1.37281e-10	-1.06705e-10	-3.92812e-10	-1.48576e-09
		0.0365	-1.36657e-10	-1.07953e-10	-3.94684e-10	-1.48638e-09
		0.03652	-1.38529e-10	-1.07329e-10	-3.94372e-10	-1.48825e-09
		0.03654	-1.38529e-10	-1.07329e-10	-3.95308e-10	-1.48763e-09
		0.03656	-1.38529e-10	-1.07953e-10	-3.94684e-10	-1.48825e-09
		0.03658	-1.40401e-10	-1.08577e-10	-3.93436e-10	-1.48763e-09
		0.0366	-1.41025e-10	-1.07329e-10	-3.925e-10	-1.4895e-09
		0.03662	-1.39153e-10	-1.08577e-10	-3.92188e-10	-1.49075e-09
		0.03664	-1.39153e-10	-1.07953e-10	-3.91564e-10	-1.49137e-09
		0.03666	-1.37905e-10	-1.07329e-10	-3.93124e-10	-1.49262e-09
		0.03668	-1.36657e-10	-1.07329e-10	-3.9406e-10	-1.492e-09
		0.0367	-1.34785e-10	-1.07329e-10	-3.95308e-10	-1.49262e-09
		0.03672	-1.34161e-10	-1.07329e-10	-3.96244e-10	-1.49262e-09
		0.03674	-1.34785e-10	-1.07953e-10	-3.96244e-10	-1.49325e-09
		0.03676	-1.37905e-10	-1.07329e-10	-3.94996e-10	-1.49637e-09
		0.03678	-1.38529e-10	-1.07329e-10	-3.94372e-10	-1.49574e-09
		0.0368	-1.42273e-10	-1.08577e-10	-3.93748e-10	-1.49449e-09
		0.03682	-1.40401e-10	-1.07329e-10	-3.93436e-10	-1.49325e-09
		0.03684	-1.42273e-10	-1.07953e-10	-3.9406e-10	-1.49325e-09
		0.03686	-1.42273e-10	-1.06705e-10	-3.9406e-10	-1.492e-09
		0.03688	-1.39777e-10	-1.07329e-10	-3.93748e-10	-1.49137e-09
		0.0369	-1.39153e-10	-1.06081e-10	-3.94372e-10	-1.49013e-09
		0.03692	-1.39153e-10	-1.06705e-10	-3.94372e-10	-1.48888e-09
		0.03694	-1.37281e-10	-1.06705e-10	-3.94684e-10	-1.48763e-09
		0.03696	-1.37281e-10	-1.08577e-10	-3.9562e-10	-1.48888e-09
		0.03698	-1.36033e-10	-1.07329e-10	-3.96556e-10	-1.48825e-09
		0.037	-1.35409e-10	-1.07329e-10	-3.96556e-10	-1.48825e-09
		0.03702	-1.36657e-10	-1.05457e-10	-3.94684e-10	-1.49013e-09
		0.03704	-1.35409e-10	-1.04833e-10	-3.93124e-10	-1.49013e-09
		0.03706	-1.36657e-10	-1.05457e-10	-3.92812e-10	-1.4895e-09
		0.03708	-1.34785e-10	-1.04209e-10	-3.92812e-10	-1.48825e-09
		0.0371	-1.34785e-10	-1.06705e-10	-3.92812e-10	-1.48825e-09
		0.03712	-1.34161e-10	-1.07329e-10	-3.92812e-10	-1.48763e-09
		0.03714	-1.31665e-10	-1.07953e-10	-3.93124e-10	-1.48888e-09
		0.03716	-1.32289e-10	-1.09201e-10	-3.93436e-10	-1.48888e-09
		0.03718	-1.34785e-10	-1.08577e-10	-3.93748e-10	-1.4895e-09
		0.0372	-1.37281e-10	-1.09201e-10	-3.94684e-10	-1.49075e-09
		0.03722	-1.37281e-10	-1.08577e-10	-3.94684e-10	-1.48888e-09
		0.03724	-1.38529e-10	-1.08577e-10	-3.9562e-10	-1.49013e-09
		0.03726	-1.39153e-10	-1.08577e-10	-3.9562e-10	-1.48888e-09
		0.03728	-1.39777e-10	-1.07953e-10	-3.96868e-10	-1.4895e-09
		0.0373	-1.38529e-10	-1.07329e-10	-3.97492e-10	-1.48888e-09
		0.03732	-1.39153e-10	-1.07329e-10	-3.99052e-10	-1.49075e-09
		0.03734	-1.36657e-10	-1.06705e-10	-3.99364e-10	-1.48825e-09
		0.03736	-1.36033e-10	-1.06705e-10	-3.9874e-10	-1.49075e-09
		0.03738	-1.37281e-10	-1.06081e-10	-3.98116e-10	-1.49013e-09
		0.0374	-1.38529e-10	-1.07329e-10	-3.95932e-10	-1.48825e-09
		0.03742	-1.39777e-10	-1.08577e-10	-3.95308e-10	-1.48638e-09
		0.03744	-1.39777e-10	-1.08577e-10	-3.9406e-10	-1.48763e-09
		0.03746	-1.40401e-10	-1.10449e-10	-3.9406e-10	-1.49013e-09
		0.03748	-1.38529e-10	-1.10449e-10	-3.94684e-10	-1.49075e-09
		0.0375	-1.37281e-10	-1.07953e-10	-3.94996e-10	-1.49262e-09
		0.03752	-1.37905e-10	-1.07329e-10	-3.96556e-10	-1.49325e-09
		0.03754	-1.37905e-10	-1.06705e-10	-3.96868e-10	-1.49325e-09
		0.03756	-1.39153e-10	-1.06705e-10	-3.97492e-10	-1.49075e-09
		0.03758	-1.37905e-10	-1.06081e-10	-3.9718e-10	-1.49075e-09
		0.0376	-1.38529e-10	-1.04833e-10	-3.9718e-10	-1.49013e-09
		0.03762	-1.37281e-10	-1.04833e-10	-3.9718e-10	-1.492e-09
		0.03764	-1.36033e-10	-1.04833e-10	-3.97492e-10	-1.49325e-09
		0.03766	-1.37905e-10	-1.06081e-10	-3.98116e-10	-1.49262e-09
		0.03768	-1.39153e-10	-1.06081e-10	-3.98428e-10	-1.49262e-09
		0.0377	-1.39153e-10	-1.07329e-10	-3.97492e-10	-1.492e-09
		0.03772	-1.40401e-10	-1.09825e-10	-3.96868e-10	-1.49137e-09
		0.03774	-1.41025e-10	-1.08577e-10	-3.95308e-10	-1.4895e-09
		0.03776	-1.42273e-10	-1.11073e-10	-3.95308e-10	-1.48763e-09
		0.03778	-1.40401e-10	-1.07953e-10	-3.9406e-10	-1.48825e-09
		0.0378	-1.37905e-10	-1.06705e-10	-3.93748e-10	-1.48638e-09
		0.03782	-1.35409e-10	-1.06705e-10	-3.9406e-10	-1.48825e-09
		0.03784	-1.34161e-10	-1.06081e-10	-3.94996e-10	-1.4895e-09
		0.03786	-1.34161e-10	-1.07329e-10	-3.95308e-10	-1.49013e-09
		0.03788	-1.35409e-10	-1.07953e-10	-3.9562e-10	-1.49075e-09
		0.0379	-1.37281e-10	-1.07953e-10	-3.95308e-10	-1.49075e-09
		0.03792	-1.39777e-10	-1.08577e-10	-3.9562e-10	-1.49013e-09
		0.03794	-1.37281e-10	-1.11697e-10	-3.96244e-10	-1.49075e-09
		0.03796	-1.38529e-10	-1.12945e-10	-3.96556e-10	-1.492e-09
		0.03798	-1.37281e-10	-1.12945e-10	-3.96868e-10	-1.49325e-09
		0.038	-1.35409e-10	-1.11073e-10	-3.96868e-10	-1.49325e-09
		0.03802	-1.36657e-10	-1.09825e-10	-3.96868e-10	-1.49387e-09
		0.03804	-1.37281e-10	-1.11073e-10	-3.96244e-10	-1.49387e-09
		0.03806	-1.37281e-10	-1.08577e-10	-3.94684e-10	-1.49449e-09
		0.03808	-1.37905e-10	-1.09201e-10	-3.94684e-10	-1.492e-09
		0.0381	-1.39153e-10	-1.07329e-10	-3.9406e-10	-1.49013e-09
		0.03812	-1.39153e-10	-1.06705e-10	-3.93436e-10	-1.48888e-09
		0.03814	-1.37905e-10	-1.06081e-10	-3.925e-10	-1.48825e-09
		0.03816	-1.37281e-10	-1.06081e-10	-3.91564e-10	-1.48825e-09
		0.03818	-1.35409e-10	-1.07953e-10	-3.91876e-10	-1.48888e-09
		0.0382	-1.35409e-10	-1.07329e-10	-3.91252e-10	-1.49013e-09
		0.03822	-1.34785e-10	-1.07329e-10	-3.91252e-10	-1.4895e-09
		0.03824	-1.34161e-10	-1.07953e-10	-3.91564e-10	-1.49013e-09
		0.03826	-1.37905e-10	-1.09825e-10	-3.9094e-10	-1.492e-09
		0.03828	-1.39153e-10	-1.10449e-10	-3.90628e-10	-1.49137e-09
		0.0383	-1.42273e-10	-1.10449e-10	-3.90628e-10	-1.49075e-09
		0.03832	-1.43521e-10	-1.11073e-10	-3.90628e-10	-1.49137e-09
		0.03834	-1.43521e-10	-1.11073e-10	-3.91876e-10	-1.49137e-09
		0.03836	-1.44145e-10	-1.09825e-10	-3.93748e-10	-1.49075e-09
		0.03838	-1.43521e-10	-1.08577e-10	-3.9562e-10	-1.49075e-09
		0.0384	-1.41649e-10	-1.06705e-10	-3.96868e-10	-1.48888e-09
		0.03842	-1.42897e-10	-1.06081e-10	-3.97804e-10	-1.48763e-09
		0.03844	-1.41025e-10	-1.04833e-10	-3.98116e-10	-1.48638e-09
		0.03846	-1.39777e-10	-1.06081e-10	-3.98116e-10	-1.48763e-09
		0.03848	-1.37905e-10	-1.05457e-10	-3.9718e-10	-1.48888e-09
		0.0385	-1.37905e-10	-1.05457e-10	-3.96868e-10	-1.4895e-09
		0.03852	-1.37905e-10	-1.06081e-10	-3.94996e-10	-1.49137e-09
		0.03854	-1.37905e-10	-1.07329e-10	-3.93436e-10	-1.492e-09
		0.03856	-1.36657e-10	-1.08577e-10	-3.93124e-10	-1.49262e-09
		0.03858	-1.39153e-10	-1.07329e-10	-3.93748e-10	-1.49075e-09
		0.0386	-1.39777e-10	-1.07953e-10	-3.93124e-10	-1.49013e-09
		0.03862	-1.39777e-10	-1.08577e-10	-3.94372e-10	-1.48888e-09
		0.03864	-1.39777e-10	-1.07953e-10	-3.94684e-10	-1.49075e-09
		0.03866	-1.40401e-10	-1.07953e-10	-3.96244e-10	-1.4895e-09
		0.03868	-1.40401e-10	-1.08577e-10	-3.96556e-10	-1.49137e-09
		0.0387	-1.39777e-10	-1.06705e-10	-3.94996e-10	-1.49262e-09
		0.03872	-1.39777e-10	-1.05457e-10	-3.94684e-10	-1.49325e-09
		0.03874	-1.39777e-10	-1.04209e-10	-3.92188e-10	-1.49262e-09
		0.03876	-1.36033e-10	-1.03585e-10	-3.92188e-10	-1.49013e-09
		0.03878	-1.36033e-10	-1.02961e-10	-3.91252e-10	-1.49013e-09
		0.0388	-1.34785e-10	-1.03585e-10	-3.9094e-10	-1.49137e-09
		0.03882	-1.36033e-10	-1.04833e-10	-3.91564e-10	-1.49262e-09
		0.03884	-1.36657e-10	-1.04833e-10	-3.92188e-10	-1.49449e-09
		0.03886	-1.37905e-10	-1.04209e-10	-3.925e-10	-1.49512e-09
		0.03888	-1.39777e-10	-1.04209e-10	-3.92812e-10	-1.49637e-09
		0.0389	-1.39153e-10	-1.06081e-10	-3.92812e-10	-1.49574e-09
		0.03892	-1.37905e-10	-1.06705e-10	-3.93124e-10	-1.49574e-09
		0.03894	-1.37281e-10	-1.07329e-10	-3.93436e-10	-1.49262e-09
		0.03896	-1.35409e-10	-1.07953e-10	-3.94372e-10	-1.49325e-09
		0.03898	-1.35409e-10	-1.09201e-10	-3.95308e-10	-1.49262e-09
		0.039	-1.32913e-10	-1.07953e-10	-3.94996e-10	-1.4895e-09
		0.03902	-1.32289e-10	-1.07329e-10	-3.95308e-10	-1.48888e-09
		0.03904	-1.34161e-10	-1.06705e-10	-3.94684e-10	-1.48763e-09
		0.03906	-1.34785e-10	-1.05457e-10	-3.9406e-10	-1.48763e-09
		0.03908	-1.36657e-10	-1.05457e-10	-3.92812e-10	-1.48701e-09
		0.0391	-1.39777e-10	-1.05457e-10	-3.925e-10	-1.48763e-09
		0.03912	-1.40401e-10	-1.04833e-10	-3.93748e-10	-1.48763e-09
		0.03914	-1.39777e-10	-1.05457e-10	-3.93436e-10	-1.49013e-09
		0.03916	-1.39153e-10	-1.06081e-10	-3.93748e-10	-1.49075e-09
		0.03918	-1.37905e-10	-1.06705e-10	-3.94372e-10	-1.492e-09
		0.0392	-1.34785e-10	-1.06705e-10	-3.9406e-10	-1.49262e-09
		0.03922	-1.36033e-10	-1.07329e-10	-3.94372e-10	-1.492e-09
		0.03924	-1.35409e-10	-1.06705e-10	-3.94372e-10	-1.492e-09
		0.03926	-1.36657e-10	-1.06081e-10	-3.9406e-10	-1.49137e-09
		0.03928	-1.37905e-10	-1.04833e-10	-3.9406e-10	-1.4895e-09
		0.0393	-1.37905e-10	-1.04209e-10	-3.93748e-10	-1.48638e-09
		0.03932	-1.36657e-10	-1.03585e-10	-3.9406e-10	-1.48513e-09
		0.03934	-1.34785e-10	-1.03585e-10	-3.93748e-10	-1.48389e-09
		0.03936	-1.34161e-10	-1.03585e-10	-3.94372e-10	-1.48264e-09
		0.03938	-1.34785e-10	-1.02337e-10	-3.94996e-10	-1.48451e-09
		0.0394	-1.34785e-10	-1.05457e-10	-3.9562e-10	-1.48638e-09
		0.03942	-1.35409e-10	-1.07953e-10	-3.96556e-10	-1.48638e-09
		0.03944	-1.36657e-10	-1.07953e-10	-3.97804e-10	-1.48638e-09
		0.03946	-1.37281e-10	-1.07953e-10	-3.97492e-10	-1.48763e-09
		0.03948	-1.37905e-10	-1.07953e-10	-3.96868e-10	-1.48763e-09
		0.0395	-1.38529e-10	-1.08577e-10	-3.95932e-10	-1.48701e-09
		0.03952	-1.37905e-10	-1.09825e-10	-3.94684e-10	-1.48576e-09
		0.03954	-1.38529e-10	-1.09201e-10	-3.93436e-10	-1.48513e-09
		0.03956	-1.37905e-10	-1.08577e-10	-3.93748e-10	-1.48389e-09
		0.03958	-1.39153e-10	-1.08577e-10	-3.9406e-10	-1.48389e-09
		0.0396	-1.39777e-10	-1.06705e-10	-3.94996e-10	-1.48451e-09
		0.03962	-1.39153e-10	-1.07329e-10	-3.95308e-10	-1.48576e-09
		0.03964	-1.39153e-10	-1.05457e-10	-3.95308e-10	-1.48701e-09
		0.03966	-1.37905e-10	-1.04833e-10	-3.94684e-10	-1.48825e-09
		0.03968	-1.39153e-10	-1.06705e-10	-3.94684e-10	-1.48825e-09
		0.0397	-1.38529e-10	-1.07329e-10	-3.93436e-10	-1.48763e-09
		0.03972	-1.40401e-10	-1.07329e-10	-3.92812e-10	-1.48763e-09
		0.03974	-1.41649e-10	-1.07953e-10	-3.91564e-10	-1.48576e-09
		0.03976	-1.41649e-10	-1.07329e-10	-3.92188e-10	-1.48513e-09
		0.03978	-1.41649e-10	-1.07953e-10	-3.92812e-10	-1.48576e-09
		0.0398	-1.41649e-10	-1.07329e-10	-3.93124e-10	-1.48763e-09
		0.03982	-1.39777e-10	-1.07329e-10	-3.9406e-10	-1.48888e-09
		0.03984	-1.40401e-10	-1.06081e-10	-3.9562e-10	-1.48701e-09
		0.03986	-1.37905e-10	-1.05457e-10	-3.94996e-10	-1.48825e-09
		0.03988	-1.39153e-10	-1.06705e-10	-3.94372e-10	-1.48701e-09
		0.0399	-1.39153e-10	-1.04209e-10	-3.9406e-10	-1.48825e-09
		0.03992	-1.39153e-10	-1.07329e-10	-3.93748e-10	-1.48701e-09
[truncated: 23,303 more rows]
