# Supplementary material for: Physiological roles of endocytosis and presynaptic scaffold in vesicle replenishment at fast and slow central synapses
Source: eLife. 2024 Jun 3;12:RP90497. doi: 10.7554/eLife.90497 (PMC11147502; doi:10.7554/eLife.90497)
Supplement: Figure 6—figure supplement 1—source data 1. [file elife-90497-fig6-figsupp1-data1.xlsx]

## Sheet: 10 Hz data, Panel A
		Panel A_sample EPSC traces					Panel A_normalized EPSC amplitude vs stimulation (#)								Panel A_average facilitation at EPSCs (#26-30)
		Time (s)	Control	Bafilomycin	Folimycin		Stimulation (#)	Control		Bafilomycin		Folimycin				Control	Bafilomycin	Folimycin
								Mean	SEM	Mean	SEM	Mean	SEM		Mean	1.85	2.15	2.22
		0	-1.70889e-10	-1.14105e-10	-9.80946e-11		1	1	0	1	0	1	0		SEM	0.17	0.11	0.23
		2e-05	-1.7089e-10	-1.14104e-10	-9.80952e-11		2	1.66204	0.114833	1.54849	0.160836	1.92512	0.183088		n number	17	7	8
		4e-05	-1.70893e-10	-1.141e-10	-9.80972e-11		3	1.9477	0.12172	2.23942	0.279379	2.45185	0.235775		p-value	-	0.3	0.21
		6e-05	-1.70898e-10	-1.14093e-10	-9.81004e-11		4	2.09251	0.185418	2.6973	0.232159	2.86047	0.218107
		8e-05	-1.70904e-10	-1.14084e-10	-9.81049e-11		5	2.18297	0.198456	2.66933	0.367154	2.75179	0.258996
		0.0001	-1.70913e-10	-1.14073e-10	-9.81107e-11		6	2.31873	0.226483	2.47408	0.267057	2.59157	0.234798
		0.00012	-1.70924e-10	-1.14059e-10	-9.81176e-11		7	2.34223	0.294334	2.79416	0.406475	2.65934	0.206244
		0.00014	-1.70937e-10	-1.14043e-10	-9.81255e-11		8	2.31832	0.173297	2.77363	0.273635	2.76264	0.228811
		0.00016	-1.70952e-10	-1.14025e-10	-9.81345e-11		9	2.18011	0.209377	2.62965	0.453573	2.37488	0.231039
		0.00018	-1.70969e-10	-1.14006e-10	-9.81443e-11		10	2.18214	0.180379	2.83801	0.351172	2.7163	0.322077
		0.0002	-1.70988e-10	-1.13984e-10	-9.81548e-11		11	2.01945	0.176765	2.70867	0.3916	2.58761	0.298145
		0.00022	-1.71009e-10	-1.13961e-10	-9.81659e-11		12	2.26197	0.250741	2.59648	0.22623	2.81924	0.180866
		0.00024	-1.71033e-10	-1.13937e-10	-9.81774e-11		13	2.19677	0.244547	2.27321	0.302041	2.57118	0.0967084
		0.00026	-1.71058e-10	-1.13911e-10	-9.81894e-11		14	2.15335	0.187523	2.53784	0.298572	2.80239	0.206701
		0.00028	-1.71086e-10	-1.13884e-10	-9.82017e-11		15	1.89168	0.171376	2.13426	0.227707	2.5862	0.186458
		0.0003	-1.71115e-10	-1.13857e-10	-9.82142e-11		16	1.97877	0.211356	2.31629	0.119649	2.32315	0.257723
		0.00032	-1.71145e-10	-1.13829e-10	-9.82267e-11		17	1.88853	0.225363	2.48005	0.188346	2.65516	0.372086
		0.00034	-1.71177e-10	-1.13801e-10	-9.82393e-11		18	2.04581	0.167142	2.32701	0.313501	2.59101	0.262634
		0.00036	-1.7121e-10	-1.13772e-10	-9.8252e-11		19	2.00867	0.184585	2.09056	0.0831422	2.41605	0.256072
		0.00038	-1.71243e-10	-1.13743e-10	-9.82645e-11		20	1.98133	0.189885	2.28912	0.157326	2.34586	0.220611
		0.0004	-1.71277e-10	-1.13714e-10	-9.82771e-11		21	1.88891	0.147771	2.11462	0.204734	2.60875	0.29787
		0.00042	-1.71312e-10	-1.13685e-10	-9.82895e-11		22	1.93072	0.194062	2.42666	0.325588	2.37121	0.15213
		0.00044	-1.71347e-10	-1.13657e-10	-9.83019e-11		23	1.97201	0.191418	2.13395	0.135797	2.59114	0.187689
		0.00046	-1.71383e-10	-1.13629e-10	-9.83141e-11		24	1.92225	0.201182	2.1726	0.247759	2.57716	0.254415
		0.00048	-1.71419e-10	-1.13603e-10	-9.83262e-11		25	2.04691	0.237657	2.03259	0.256625	2.27004	0.299545
		0.0005	-1.71455e-10	-1.13577e-10	-9.83382e-11		26	2.02986	0.178855	1.88634	0.124099	2.19845	0.277424
		0.00052	-1.71491e-10	-1.13553e-10	-9.835e-11		27	1.95517	0.205279	2.3671	0.19196	2.10791	0.373157
		0.00054	-1.71527e-10	-1.1353e-10	-9.83614e-11		28	1.79435	0.20259	2.19243	0.2332	2.26361	0.237236
		0.00056	-1.71562e-10	-1.13509e-10	-9.83725e-11		29	1.75027	0.159555	2.16992	0.267421	2.38539	0.258415
		0.00058	-1.71597e-10	-1.1349e-10	-9.83831e-11		30	1.71959	0.157415	2.12483	0.161259	2.14567	0.242508
		0.0006	-1.7163e-10	-1.13471e-10	-9.83932e-11
		0.00062	-1.71663e-10	-1.13455e-10	-9.84027e-11
		0.00064	-1.71695e-10	-1.13439e-10	-9.84115e-11
		0.00066	-1.71726e-10	-1.13425e-10	-9.84198e-11
		0.00068	-1.71755e-10	-1.13413e-10	-9.84274e-11
		0.0007	-1.71782e-10	-1.13401e-10	-9.84345e-11
		0.00072	-1.71808e-10	-1.13392e-10	-9.84409e-11
		0.00074	-1.71833e-10	-1.13383e-10	-9.84468e-11
		0.00076	-1.71856e-10	-1.13375e-10	-9.84523e-11
		0.00078	-1.71877e-10	-1.13369e-10	-9.84574e-11
		0.0008	-1.71896e-10	-1.13365e-10	-9.84623e-11
		0.00082	-1.71914e-10	-1.13361e-10	-9.8467e-11
		0.00084	-1.71931e-10	-1.13359e-10	-9.84717e-11
		0.00086	-1.71946e-10	-1.13358e-10	-9.84765e-11
		0.00088	-1.7196e-10	-1.13359e-10	-9.84813e-11
		0.0009	-1.71973e-10	-1.13361e-10	-9.84864e-11
		0.00092	-1.71986e-10	-1.13365e-10	-9.84916e-11
		0.00094	-1.71999e-10	-1.1337e-10	-9.84972e-11
		0.00096	-1.72011e-10	-1.13377e-10	-9.85029e-11
		0.00098	-1.72024e-10	-1.13385e-10	-9.8509e-11
		0.001	-1.72036e-10	-1.13395e-10	-9.85155e-11
		0.00102	-1.72049e-10	-1.13406e-10	-9.85225e-11
		0.00104	-1.72062e-10	-1.13419e-10	-9.85299e-11
		0.00106	-1.72074e-10	-1.13433e-10	-9.85378e-11
		0.00108	-1.72087e-10	-1.13448e-10	-9.85464e-11
		0.0011	-1.72101e-10	-1.13463e-10	-9.85556e-11
		0.00112	-1.72115e-10	-1.1348e-10	-9.85655e-11
		0.00114	-1.72129e-10	-1.13497e-10	-9.85762e-11
		0.00116	-1.72144e-10	-1.13514e-10	-9.85877e-11
		0.00118	-1.72159e-10	-1.13532e-10	-9.85999e-11
		0.0012	-1.72176e-10	-1.1355e-10	-9.86131e-11
		0.00122	-1.72193e-10	-1.13568e-10	-9.8627e-11
		0.00124	-1.7221e-10	-1.13585e-10	-9.86418e-11
		0.00126	-1.72228e-10	-1.13602e-10	-9.86573e-11
		0.00128	-1.72247e-10	-1.13618e-10	-9.86736e-11
		0.0013	-1.72266e-10	-1.13633e-10	-9.86907e-11
		0.00132	-1.72286e-10	-1.13646e-10	-9.87086e-11
		0.00134	-1.72307e-10	-1.13659e-10	-9.87272e-11
		0.00136	-1.72328e-10	-1.1367e-10	-9.87466e-11
		0.00138	-1.72349e-10	-1.1368e-10	-9.87667e-11
		0.0014	-1.72371e-10	-1.13688e-10	-9.87874e-11
		0.00142	-1.72394e-10	-1.13694e-10	-9.88086e-11
		0.00144	-1.72417e-10	-1.13698e-10	-9.88303e-11
		0.00146	-1.7244e-10	-1.13701e-10	-9.88524e-11
		0.00148	-1.72464e-10	-1.13702e-10	-9.88747e-11
		0.0015	-1.72488e-10	-1.137e-10	-9.88973e-11
		0.00152	-1.72513e-10	-1.13698e-10	-9.89202e-11
		0.00154	-1.72538e-10	-1.13694e-10	-9.89432e-11
		0.00156	-1.72564e-10	-1.13688e-10	-9.89663e-11
		0.00158	-1.72589e-10	-1.13681e-10	-9.89894e-11
		0.0016	-1.72616e-10	-1.13673e-10	-9.90126e-11
		0.00162	-1.72642e-10	-1.13664e-10	-9.90358e-11
		0.00164	-1.72669e-10	-1.13654e-10	-9.90591e-11
		0.00166	-1.72696e-10	-1.13643e-10	-9.90825e-11
		0.00168	-1.72724e-10	-1.13631e-10	-9.91059e-11
		0.0017	-1.72751e-10	-1.13618e-10	-9.91292e-11
		0.00172	-1.72779e-10	-1.13606e-10	-9.91524e-11
		0.00174	-1.72806e-10	-1.13592e-10	-9.91755e-11
		0.00176	-1.72833e-10	-1.13579e-10	-9.91981e-11
		0.00178	-1.72861e-10	-1.13565e-10	-9.92203e-11
		0.0018	-1.72888e-10	-1.13552e-10	-9.9242e-11
		0.00182	-1.72916e-10	-1.13538e-10	-9.92632e-11
		0.00184	-1.72943e-10	-1.13525e-10	-9.92836e-11
		0.00186	-1.72971e-10	-1.13512e-10	-9.93033e-11
		0.00188	-1.73e-10	-1.135e-10	-9.93221e-11
		0.0019	-1.73028e-10	-1.13488e-10	-9.93401e-11
		0.00192	-1.73057e-10	-1.13476e-10	-9.93572e-11
		0.00194	-1.73085e-10	-1.13465e-10	-9.93733e-11
		0.00196	-1.73114e-10	-1.13455e-10	-9.93884e-11
		0.00198	-1.73142e-10	-1.13446e-10	-9.94025e-11
		0.002	-1.7317e-10	-1.13437e-10	-9.94156e-11
		0.00202	-1.73197e-10	-1.1343e-10	-9.94278e-11
		0.00204	-1.73224e-10	-1.13423e-10	-9.94391e-11
		0.00206	-1.7325e-10	-1.13417e-10	-9.94493e-11
		0.00208	-1.73275e-10	-1.13412e-10	-9.94586e-11
		0.0021	-1.733e-10	-1.13408e-10	-9.94669e-11
		0.00212	-1.73324e-10	-1.13404e-10	-9.94742e-11
		0.00214	-1.73348e-10	-1.13402e-10	-9.94806e-11
		0.00216	-1.73371e-10	-1.13399e-10	-9.94859e-11
		0.00218	-1.73393e-10	-1.13396e-10	-9.94901e-11
		0.0022	-1.73417e-10	-1.13392e-10	-9.9493e-11
		0.00222	-1.73441e-10	-1.13386e-10	-9.94944e-11
		0.00224	-1.73467e-10	-1.13378e-10	-9.94939e-11
		0.00226	-1.73495e-10	-1.13365e-10	-9.94911e-11
		0.00228	-1.73527e-10	-1.13348e-10	-9.94857e-11
		0.0023	-1.73563e-10	-1.13325e-10	-9.94771e-11
		0.00232	-1.73605e-10	-1.13294e-10	-9.94648e-11
		0.00234	-1.73654e-10	-1.13257e-10	-9.94487e-11
		0.00236	-1.7371e-10	-1.13211e-10	-9.94281e-11
		0.00238	-1.73774e-10	-1.13157e-10	-9.94028e-11
		0.0024	-1.73848e-10	-1.13095e-10	-9.93726e-11
		0.00242	-1.73932e-10	-1.13024e-10	-9.93372e-11
		0.00244	-1.74028e-10	-1.12945e-10	-9.92965e-11
		0.00246	-1.74137e-10	-1.12859e-10	-9.92508e-11
		0.00248	-1.74259e-10	-1.12766e-10	-9.91999e-11
		0.0025	-1.74396e-10	-1.12667e-10	-9.91443e-11
		0.00252	-1.74549e-10	-1.12564e-10	-9.90844e-11
		0.00254	-1.74721e-10	-1.12458e-10	-9.90205e-11
		0.00256	-1.74911e-10	-1.12351e-10	-9.89532e-11
		0.00258	-1.75123e-10	-1.12245e-10	-9.88831e-11
		0.0026	-1.75357e-10	-1.12143e-10	-9.88109e-11
		0.00262	-1.75615e-10	-1.12048e-10	-9.87375e-11
		0.00264	-1.75899e-10	-1.11961e-10	-9.86637e-11
		0.00266	-1.7621e-10	-1.11886e-10	-9.85906e-11
		0.00268	-1.76549e-10	-1.11827e-10	-9.85192e-11
		0.0027	-1.76918e-10	-1.11785e-10	-9.84507e-11
		0.00272	-1.77318e-10	-1.11765e-10	-9.83863e-11
		0.00274	-1.7775e-10	-1.1177e-10	-9.83273e-11
		0.00276	-1.78216e-10	-1.11803e-10	-9.82751e-11
		0.00278	-1.78717e-10	-1.11867e-10	-9.82311e-11
		0.0028	-1.79253e-10	-1.11967e-10	-9.81965e-11
		0.00282	-1.79825e-10	-1.12106e-10	-9.81731e-11
		0.00284	-1.80433e-10	-1.12286e-10	-9.81621e-11
		0.00286	-1.8108e-10	-1.12512e-10	-9.81651e-11
		0.00288	-1.81764e-10	-1.12786e-10	-9.81836e-11
		0.0029	-1.82487e-10	-1.13111e-10	-9.8219e-11
		0.00292	-1.83248e-10	-1.13491e-10	-9.8273e-11
		0.00294	-1.84049e-10	-1.13928e-10	-9.83469e-11
		0.00296	-1.84889e-10	-1.14426e-10	-9.84421e-11
		0.00298	-1.85767e-10	-1.14985e-10	-9.85601e-11
		0.003	-1.86685e-10	-1.1561e-10	-9.87021e-11
		0.00302	-1.8764e-10	-1.16301e-10	-9.88694e-11
		0.00304	-1.88634e-10	-1.17061e-10	-9.90631e-11
		0.00306	-1.89666e-10	-1.17891e-10	-9.92842e-11
		0.00308	-1.90733e-10	-1.18792e-10	-9.95336e-11
		0.0031	-1.91837e-10	-1.19766e-10	-9.98119e-11
		0.00312	-1.92976e-10	-1.20811e-10	-1.0012e-10
		0.00314	-1.9415e-10	-1.2193e-10	-1.00458e-10
		0.00316	-1.95357e-10	-1.2312e-10	-1.00826e-10
		0.00318	-1.96596e-10	-1.24382e-10	-1.01226e-10
		0.0032	-1.97866e-10	-1.25714e-10	-1.01656e-10
		0.00322	-1.99166e-10	-1.27115e-10	-1.02116e-10
		0.00324	-2.00494e-10	-1.28583e-10	-1.02608e-10
		0.00326	-2.01848e-10	-1.30116e-10	-1.03129e-10
		0.00328	-2.03227e-10	-1.31711e-10	-1.03681e-10
		0.0033	-2.04629e-10	-1.33365e-10	-1.04261e-10
		0.00332	-2.0605e-10	-1.35076e-10	-1.04869e-10
		0.00334	-2.0749e-10	-1.36839e-10	-1.05505e-10
		0.00336	-2.08945e-10	-1.38651e-10	-1.06166e-10
		0.00338	-2.10414e-10	-1.40507e-10	-1.06852e-10
		0.0034	-2.11893e-10	-1.42404e-10	-1.07562e-10
		0.00342	-2.13381e-10	-1.44337e-10	-1.08293e-10
		0.00344	-2.14876e-10	-1.46302e-10	-1.09045e-10
		0.00346	-2.16374e-10	-1.48292e-10	-1.09815e-10
		0.00348	-2.17872e-10	-1.50304e-10	-1.10602e-10
		0.0035	-2.19369e-10	-1.52331e-10	-1.11403e-10
		0.00352	-2.20862e-10	-1.54369e-10	-1.12218e-10
		0.00354	-2.22347e-10	-1.56413e-10	-1.13044e-10
		0.00356	-2.23823e-10	-1.58456e-10	-1.13879e-10
		0.00358	-2.25286e-10	-1.60493e-10	-1.14721e-10
		0.0036	-2.26734e-10	-1.6252e-10	-1.15567e-10
		0.00362	-2.28165e-10	-1.64531e-10	-1.16416e-10
		0.00364	-2.29575e-10	-1.6652e-10	-1.17265e-10
		0.00366	-2.30965e-10	-1.68483e-10	-1.18111e-10
		0.00368	-2.3233e-10	-1.70415e-10	-1.18954e-10
		0.0037	-2.33669e-10	-1.72311e-10	-1.1979e-10
		0.00372	-2.3498e-10	-1.74166e-10	-1.20617e-10
		0.00374	-2.36261e-10	-1.75977e-10	-1.21434e-10
		0.00376	-2.3751e-10	-1.77738e-10	-1.22239e-10
		0.00378	-2.38724e-10	-1.79446e-10	-1.23029e-10
		0.0038	-2.39902e-10	-1.81098e-10	-1.23803e-10
		0.00382	-2.41042e-10	-1.82691e-10	-1.24558e-10
		0.00384	-2.42143e-10	-1.84221e-10	-1.25294e-10
		0.00386	-2.43203e-10	-1.85686e-10	-1.26009e-10
		0.00388	-2.4422e-10	-1.87084e-10	-1.26702e-10
		0.0039	-2.45195e-10	-1.88412e-10	-1.27371e-10
		0.00392	-2.46126e-10	-1.8967e-10	-1.28015e-10
		0.00394	-2.47013e-10	-1.90856e-10	-1.28633e-10
		0.00396	-2.47855e-10	-1.91969e-10	-1.29225e-10
		0.00398	-2.48653e-10	-1.93009e-10	-1.29789e-10
		0.004	-2.49407e-10	-1.93976e-10	-1.30326e-10
		0.00402	-2.50116e-10	-1.9487e-10	-1.30834e-10
		0.00404	-2.50783e-10	-1.95691e-10	-1.31314e-10
		0.00406	-2.51406e-10	-1.96441e-10	-1.31766e-10
		0.00408	-2.51986e-10	-1.97121e-10	-1.32188e-10
		0.0041	-2.52525e-10	-1.97732e-10	-1.32582e-10
		0.00412	-2.53023e-10	-1.98276e-10	-1.32948e-10
		0.00414	-2.5348e-10	-1.98756e-10	-1.33286e-10
		0.00416	-2.53898e-10	-1.99173e-10	-1.33597e-10
		0.00418	-2.54277e-10	-1.9953e-10	-1.3388e-10
		0.0042	-2.54619e-10	-1.99831e-10	-1.34138e-10
		0.00422	-2.54923e-10	-2.00079e-10	-1.34372e-10
		0.00424	-2.55191e-10	-2.00277e-10	-1.34581e-10
		0.00426	-2.55424e-10	-2.00429e-10	-1.34768e-10
		0.00428	-2.55623e-10	-2.00539e-10	-1.34933e-10
		0.0043	-2.55788e-10	-2.00609e-10	-1.35078e-10
		0.00432	-2.55921e-10	-2.00642e-10	-1.35205e-10
		0.00434	-2.56023e-10	-2.00643e-10	-1.35313e-10
		0.00436	-2.56096e-10	-2.00614e-10	-1.35406e-10
		0.00438	-2.5614e-10	-2.00557e-10	-1.35483e-10
		0.0044	-2.56158e-10	-2.00476e-10	-1.35546e-10
		0.00442	-2.56151e-10	-2.00371e-10	-1.35596e-10
		0.00444	-2.5612e-10	-2.00247e-10	-1.35635e-10
		0.00446	-2.56067e-10	-2.00104e-10	-1.35663e-10
		0.00448	-2.55994e-10	-1.99944e-10	-1.3568e-10
		0.0045	-2.55901e-10	-1.99769e-10	-1.35689e-10
		0.00452	-2.55789e-10	-1.99581e-10	-1.3569e-10
		0.00454	-2.55661e-10	-1.99381e-10	-1.35683e-10
		0.00456	-2.55516e-10	-1.9917e-10	-1.35669e-10
		0.00458	-2.55357e-10	-1.9895e-10	-1.35649e-10
		0.0046	-2.55183e-10	-1.98721e-10	-1.35624e-10
		0.00462	-2.54997e-10	-1.98485e-10	-1.35593e-10
		0.00464	-2.54798e-10	-1.98242e-10	-1.35557e-10
		0.00466	-2.54588e-10	-1.97993e-10	-1.35516e-10
		0.00468	-2.54368e-10	-1.97738e-10	-1.35471e-10
		0.0047	-2.54138e-10	-1.97479e-10	-1.35423e-10
		0.00472	-2.53899e-10	-1.97215e-10	-1.35371e-10
		0.00474	-2.53653e-10	-1.96948e-10	-1.35315e-10
		0.00476	-2.53399e-10	-1.96679e-10	-1.35257e-10
		0.00478	-2.53139e-10	-1.96406e-10	-1.35196e-10
		0.0048	-2.52873e-10	-1.96131e-10	-1.35133e-10
		0.00482	-2.52603e-10	-1.95855e-10	-1.35068e-10
		0.00484	-2.52327e-10	-1.95577e-10	-1.35001e-10
		0.00486	-2.52048e-10	-1.95298e-10	-1.34933e-10
		0.00488	-2.51766e-10	-1.95018e-10	-1.34864e-10
		0.0049	-2.5148e-10	-1.94738e-10	-1.34794e-10
		0.00492	-2.51192e-10	-1.94457e-10	-1.34724e-10
		0.00494	-2.50903e-10	-1.94177e-10	-1.34653e-10
		0.00496	-2.50612e-10	-1.93896e-10	-1.34581e-10
		0.00498	-2.50319e-10	-1.93616e-10	-1.3451e-10
		0.005	-2.50026e-10	-1.93336e-10	-1.34438e-10
		0.00502	-2.49733e-10	-1.93056e-10	-1.34366e-10
		0.00504	-2.4944e-10	-1.92777e-10	-1.34295e-10
		0.00506	-2.49147e-10	-1.92497e-10	-1.34224e-10
		0.00508	-2.48855e-10	-1.92218e-10	-1.34154e-10
		0.0051	-2.48562e-10	-1.91939e-10	-1.34084e-10
		0.00512	-2.4827e-10	-1.91661e-10	-1.34015e-10
		0.00514	-2.47978e-10	-1.91383e-10	-1.33947e-10
		0.00516	-2.47686e-10	-1.91106e-10	-1.3388e-10
		0.00518	-2.47392e-10	-1.9083e-10	-1.33814e-10
		0.0052	-2.47097e-10	-1.90557e-10	-1.3375e-10
		0.00522	-2.468e-10	-1.90286e-10	-1.33688e-10
		0.00524	-2.46498e-10	-1.9002e-10	-1.33627e-10
		0.00526	-2.46192e-10	-1.89759e-10	-1.3357e-10
		0.00528	-2.4588e-10	-1.89504e-10	-1.33515e-10
		0.0053	-2.45562e-10	-1.89256e-10	-1.33464e-10
		0.00532	-2.45235e-10	-1.89017e-10	-1.33417e-10
		0.00534	-2.449e-10	-1.88787e-10	-1.33373e-10
		0.00536	-2.44555e-10	-1.88566e-10	-1.33334e-10
		0.00538	-2.44199e-10	-1.88355e-10	-1.33299e-10
		0.0054	-2.43831e-10	-1.88154e-10	-1.33269e-10
		0.00542	-2.4345e-10	-1.87963e-10	-1.33244e-10
		0.00544	-2.43054e-10	-1.87782e-10	-1.33224e-10
		0.00546	-2.42644e-10	-1.87609e-10	-1.33208e-10
		0.00548	-2.42217e-10	-1.87444e-10	-1.33197e-10
		0.0055	-2.41772e-10	-1.87286e-10	-1.3319e-10
		0.00552	-2.41308e-10	-1.87133e-10	-1.33187e-10
		0.00554	-2.40824e-10	-1.86984e-10	-1.33187e-10
		0.00556	-2.40319e-10	-1.86837e-10	-1.33189e-10
		0.00558	-2.39792e-10	-1.8669e-10	-1.33194e-10
		0.0056	-2.3924e-10	-1.8654e-10	-1.33201e-10
		0.00562	-2.38663e-10	-1.86385e-10	-1.33208e-10
		0.00564	-2.38059e-10	-1.86223e-10	-1.33215e-10
		0.00566	-2.37426e-10	-1.86051e-10	-1.33221e-10
		0.00568	-2.36764e-10	-1.85865e-10	-1.33225e-10
		0.0057	-2.3607e-10	-1.85662e-10	-1.33226e-10
		0.00572	-2.35344e-10	-1.8544e-10	-1.33221e-10
		0.00574	-2.34585e-10	-1.85195e-10	-1.33211e-10
		0.00576	-2.33791e-10	-1.84923e-10	-1.33194e-10
		0.00578	-2.32963e-10	-1.84622e-10	-1.33169e-10
		0.0058	-2.32098e-10	-1.84287e-10	-1.33133e-10
		0.00582	-2.31197e-10	-1.83915e-10	-1.33087e-10
		0.00584	-2.30259e-10	-1.83504e-10	-1.33028e-10
		0.00586	-2.29283e-10	-1.83049e-10	-1.32954e-10
		0.00588	-2.28269e-10	-1.82547e-10	-1.32865e-10
		0.0059	-2.27217e-10	-1.81996e-10	-1.32759e-10
		0.00592	-2.26127e-10	-1.81392e-10	-1.32635e-10
		0.00594	-2.24998e-10	-1.80733e-10	-1.32491e-10
		0.00596	-2.2383e-10	-1.80016e-10	-1.32326e-10
		0.00598	-2.22624e-10	-1.79239e-10	-1.32138e-10
		0.006	-2.21379e-10	-1.78399e-10	-1.31927e-10
		0.00602	-2.20096e-10	-1.77494e-10	-1.31691e-10
		0.00604	-2.18775e-10	-1.76522e-10	-1.3143e-10
		0.00606	-2.17416e-10	-1.75483e-10	-1.31142e-10
		0.00608	-2.16021e-10	-1.74375e-10	-1.30827e-10
		0.0061	-2.1459e-10	-1.73198e-10	-1.30484e-10
		0.00612	-2.13125e-10	-1.71951e-10	-1.30114e-10
		0.00614	-2.11626e-10	-1.70633e-10	-1.29715e-10
		0.00616	-2.10095e-10	-1.69246e-10	-1.29289e-10
		0.00618	-2.08535e-10	-1.67791e-10	-1.28833e-10
		0.0062	-2.06945e-10	-1.66267e-10	-1.2835e-10
		0.00622	-2.05329e-10	-1.64677e-10	-1.27839e-10
		0.00624	-2.03687e-10	-1.63022e-10	-1.273e-10
		0.00626	-2.02022e-10	-1.61305e-10	-1.26734e-10
		0.00628	-2.00337e-10	-1.59528e-10	-1.26142e-10
		0.0063	-1.98633e-10	-1.57693e-10	-1.25524e-10
		0.00632	-1.96913e-10	-1.55805e-10	-1.24882e-10
		0.00634	-1.9518e-10	-1.53866e-10	-1.24216e-10
		0.00636	-1.93435e-10	-1.51879e-10	-1.23528e-10
		0.00638	-1.91683e-10	-1.4985e-10	-1.22818e-10
		0.0064	-1.89924e-10	-1.47782e-10	-1.22089e-10
		0.00642	-1.88161e-10	-1.45679e-10	-1.21342e-10
		0.00644	-1.86398e-10	-1.43547e-10	-1.20578e-10
		0.00646	-1.84638e-10	-1.41389e-10	-1.198e-10
		0.00648	-1.82881e-10	-1.39212e-10	-1.19008e-10
		0.0065	-1.81133e-10	-1.3702e-10	-1.18205e-10
		0.00652	-1.79394e-10	-1.34819e-10	-1.17393e-10
		0.00654	-1.77668e-10	-1.32613e-10	-1.16574e-10
		0.00656	-1.75957e-10	-1.30407e-10	-1.1575e-10
		0.00658	-1.74265e-10	-1.28208e-10	-1.14924e-10
		0.0066	-1.72592e-10	-1.2602e-10	-1.14096e-10
		0.00662	-1.70941e-10	-1.23848e-10	-1.13271e-10
		0.00664	-1.69316e-10	-1.21698e-10	-1.12449e-10
		0.00666	-1.67717e-10	-1.19574e-10	-1.11633e-10
		0.00668	-1.66147e-10	-1.17481e-10	-1.10824e-10
		0.0067	-1.64609e-10	-1.15425e-10	-1.10025e-10
		0.00672	-1.63103e-10	-1.13409e-10	-1.09238e-10
		0.00674	-1.61631e-10	-1.11438e-10	-1.08464e-10
		0.00676	-1.60196e-10	-1.09516e-10	-1.07705e-10
		0.00678	-1.58799e-10	-1.07648e-10	-1.06963e-10
		0.0068	-1.57442e-10	-1.05836e-10	-1.06239e-10
		0.00682	-1.56125e-10	-1.04083e-10	-1.05534e-10
		0.00684	-1.54849e-10	-1.02394e-10	-1.04849e-10
		0.00686	-1.53616e-10	-1.00771e-10	-1.04186e-10
		0.00688	-1.52427e-10	-9.92144e-11	-1.03546e-10
		0.0069	-1.51281e-10	-9.77278e-11	-1.02929e-10
		0.00692	-1.50179e-10	-9.63121e-11	-1.02336e-10
		0.00694	-1.49122e-10	-9.49687e-11	-1.01769e-10
		0.00696	-1.48109e-10	-9.36982e-11	-1.01227e-10
		0.00698	-1.47141e-10	-9.25013e-11	-1.00711e-10
		0.007	-1.46217e-10	-9.13782e-11	-1.00221e-10
		0.00702	-1.45338e-10	-9.03288e-11	-9.9758e-11
		0.00704	-1.44503e-10	-8.93524e-11	-9.93212e-11
		0.00706	-1.43711e-10	-8.84484e-11	-9.89109e-11
		0.00708	-1.42962e-10	-8.76156e-11	-9.85268e-11
		0.0071	-1.42255e-10	-8.68524e-11	-9.81687e-11
		0.00712	-1.4159e-10	-8.61571e-11	-9.78361e-11
		0.00714	-1.40965e-10	-8.55275e-11	-9.75286e-11
		0.00716	-1.40379e-10	-8.49612e-11	-9.72452e-11
		0.00718	-1.39832e-10	-8.44553e-11	-9.69853e-11
		0.0072	-1.39323e-10	-8.40068e-11	-9.67478e-11
		0.00722	-1.38851e-10	-8.36125e-11	-9.65317e-11
		0.00724	-1.38415e-10	-8.32687e-11	-9.63356e-11
		0.00726	-1.38014e-10	-8.29721e-11	-9.61585e-11
		0.00728	-1.37647e-10	-8.27192e-11	-9.59989e-11
		0.0073	-1.37314e-10	-8.25064e-11	-9.58556e-11
		0.00732	-1.37013e-10	-8.23307e-11	-9.57272e-11
		0.00734	-1.36743e-10	-8.21887e-11	-9.56126e-11
		0.00736	-1.36503e-10	-8.20777e-11	-9.55104e-11
		0.00738	-1.36292e-10	-8.19951e-11	-9.54195e-11
		0.0074	-1.36108e-10	-8.19385e-11	-9.53388e-11
		0.00742	-1.35951e-10	-8.19056e-11	-9.5267e-11
		0.00744	-1.35818e-10	-8.18945e-11	-9.52034e-11
		0.00746	-1.35709e-10	-8.19033e-11	-9.5147e-11
		0.00748	-1.35622e-10	-8.19305e-11	-9.50969e-11
		0.0075	-1.35557e-10	-8.19744e-11	-9.50524e-11
		0.00752	-1.35511e-10	-8.20337e-11	-9.50128e-11
		0.00754	-1.35485e-10	-8.2107e-11	-9.49775e-11
		0.00756	-1.35476e-10	-8.2193e-11	-9.49459e-11
		0.00758	-1.35484e-10	-8.22907e-11	-9.49175e-11
		0.0076	-1.35509e-10	-8.23989e-11	-9.48919e-11
		0.00762	-1.35548e-10	-8.25167e-11	-9.48688e-11
		0.00764	-1.35602e-10	-8.26431e-11	-9.48478e-11
		0.00766	-1.3567e-10	-8.27772e-11	-9.48288e-11
		0.00768	-1.3575e-10	-8.29184e-11	-9.48114e-11
		0.0077	-1.35843e-10	-8.30661e-11	-9.47955e-11
		0.00772	-1.35947e-10	-8.32196e-11	-9.47811e-11
		0.00774	-1.36062e-10	-8.33783e-11	-9.47681e-11
		0.00776	-1.36188e-10	-8.35417e-11	-9.47563e-11
		0.00778	-1.36322e-10	-8.37094e-11	-9.47456e-11
		0.0078	-1.36466e-10	-8.38809e-11	-9.4736e-11
		0.00782	-1.36617e-10	-8.40555e-11	-9.47274e-11
		0.00784	-1.36776e-10	-8.42331e-11	-9.47197e-11
		0.00786	-1.36941e-10	-8.44131e-11	-9.47128e-11
		0.00788	-1.37113e-10	-8.45952e-11	-9.47067e-11
		0.0079	-1.3729e-10	-8.47788e-11	-9.47012e-11
		0.00792	-1.37471e-10	-8.49638e-11	-9.46963e-11
		0.00794	-1.37657e-10	-8.51496e-11	-9.46921e-11
		0.00796	-1.37847e-10	-8.53359e-11	-9.46885e-11
		0.00798	-1.38041e-10	-8.55223e-11	-9.46854e-11
		0.008	-1.38237e-10	-8.57085e-11	-9.46829e-11
		0.00802	-1.38436e-10	-8.58942e-11	-9.46809e-11
		0.00804	-1.38637e-10	-8.60792e-11	-9.46794e-11
		0.00806	-1.38841e-10	-8.62629e-11	-9.46784e-11
		0.00808	-1.39047e-10	-8.64454e-11	-9.46779e-11
		0.0081	-1.39255e-10	-8.66264e-11	-9.46779e-11
		0.00812	-1.39465e-10	-8.68056e-11	-9.46784e-11
		0.00814	-1.39676e-10	-8.69829e-11	-9.46794e-11
		0.00816	-1.39888e-10	-8.71582e-11	-9.4681e-11
		0.00818	-1.40101e-10	-8.73312e-11	-9.46831e-11
		0.0082	-1.40315e-10	-8.75018e-11	-9.46859e-11
		0.00822	-1.4053e-10	-8.76699e-11	-9.46893e-11
		0.00824	-1.40745e-10	-8.78355e-11	-9.46936e-11
		0.00826	-1.4096e-10	-8.79984e-11	-9.46987e-11
		0.00828	-1.41175e-10	-8.81586e-11	-9.47047e-11
		0.0083	-1.4139e-10	-8.8316e-11	-9.47118e-11
		0.00832	-1.41605e-10	-8.84707e-11	-9.47198e-11
		0.00834	-1.4182e-10	-8.86225e-11	-9.47289e-11
		0.00836	-1.42033e-10	-8.87716e-11	-9.4739e-11
		0.00838	-1.42245e-10	-8.89179e-11	-9.47503e-11
		0.0084	-1.42457e-10	-8.90615e-11	-9.47626e-11
		0.00842	-1.42667e-10	-8.92023e-11	-9.47763e-11
		0.00844	-1.42876e-10	-8.93406e-11	-9.47912e-11
		0.00846	-1.43084e-10	-8.94763e-11	-9.48074e-11
		0.00848	-1.43291e-10	-8.96097e-11	-9.4825e-11
		0.0085	-1.43495e-10	-8.97407e-11	-9.4844e-11
		0.00852	-1.43699e-10	-8.98696e-11	-9.48644e-11
		0.00854	-1.43901e-10	-8.99964e-11	-9.48863e-11
		0.00856	-1.44101e-10	-9.01214e-11	-9.49096e-11
		0.00858	-1.443e-10	-9.02445e-11	-9.49344e-11
		0.0086	-1.44499e-10	-9.03659e-11	-9.49606e-11
		0.00862	-1.44696e-10	-9.04856e-11	-9.49881e-11
		0.00864	-1.44892e-10	-9.06038e-11	-9.5017e-11
		0.00866	-1.45088e-10	-9.07203e-11	-9.50473e-11
		0.00868	-1.45283e-10	-9.08351e-11	-9.50787e-11
		0.0087	-1.45478e-10	-9.09484e-11	-9.51114e-11
		0.00872	-1.45671e-10	-9.10602e-11	-9.51453e-11
		0.00874	-1.45864e-10	-9.11705e-11	-9.51803e-11
		0.00876	-1.46057e-10	-9.12794e-11	-9.52165e-11
		0.00878	-1.46248e-10	-9.1387e-11	-9.52538e-11
		0.0088	-1.46439e-10	-9.14932e-11	-9.52921e-11
		0.00882	-1.46629e-10	-9.15982e-11	-9.53314e-11
		0.00884	-1.46818e-10	-9.17021e-11	-9.53717e-11
		0.00886	-1.47007e-10	-9.18049e-11	-9.5413e-11
		0.00888	-1.47195e-10	-9.19069e-11	-9.54552e-11
		0.0089	-1.47384e-10	-9.20081e-11	-9.54984e-11
		0.00892	-1.47572e-10	-9.21085e-11	-9.55426e-11
		0.00894	-1.47759e-10	-9.22082e-11	-9.55876e-11
		0.00896	-1.47946e-10	-9.23073e-11	-9.56334e-11
		0.00898	-1.48133e-10	-9.24058e-11	-9.56799e-11
		0.009	-1.48319e-10	-9.25037e-11	-9.5727e-11
		0.00902	-1.48505e-10	-9.2601e-11	-9.57744e-11
		0.00904	-1.4869e-10	-9.26977e-11	-9.58221e-11
		0.00906	-1.48874e-10	-9.27939e-11	-9.58699e-11
		0.00908	-1.49058e-10	-9.28896e-11	-9.59176e-11
		0.0091	-1.49242e-10	-9.29847e-11	-9.59652e-11
		0.00912	-1.49425e-10	-9.30793e-11	-9.60126e-11
		0.00914	-1.49608e-10	-9.31734e-11	-9.60596e-11
		0.00916	-1.49792e-10	-9.32671e-11	-9.6106e-11
		0.00918	-1.49975e-10	-9.33602e-11	-9.61519e-11
		0.0092	-1.50159e-10	-9.34526e-11	-9.6197e-11
		0.00922	-1.50343e-10	-9.35445e-11	-9.62412e-11
		0.00924	-1.50527e-10	-9.36357e-11	-9.62844e-11
		0.00926	-1.50711e-10	-9.37262e-11	-9.63266e-11
		0.00928	-1.50896e-10	-9.38158e-11	-9.63676e-11
		0.0093	-1.51082e-10	-9.39047e-11	-9.64074e-11
		0.00932	-1.51268e-10	-9.39928e-11	-9.64459e-11
		0.00934	-1.51454e-10	-9.40801e-11	-9.6483e-11
		0.00936	-1.51641e-10	-9.41666e-11	-9.65187e-11
		0.00938	-1.51828e-10	-9.42523e-11	-9.6553e-11
		0.0094	-1.52016e-10	-9.43373e-11	-9.65857e-11
		0.00942	-1.52204e-10	-9.44216e-11	-9.6617e-11
		0.00944	-1.52392e-10	-9.45051e-11	-9.66466e-11
		0.00946	-1.5258e-10	-9.45879e-11	-9.66748e-11
		0.00948	-1.52767e-10	-9.46699e-11	-9.67012e-11
		0.0095	-1.52955e-10	-9.47512e-11	-9.6726e-11
		0.00952	-1.53141e-10	-9.48319e-11	-9.67491e-11
		0.00954	-1.53327e-10	-9.49119e-11	-9.67706e-11
		0.00956	-1.53512e-10	-9.49914e-11	-9.67904e-11
		0.00958	-1.53696e-10	-9.50706e-11	-9.68083e-11
		0.0096	-1.53879e-10	-9.51495e-11	-9.68246e-11
		0.00962	-1.5406e-10	-9.52283e-11	-9.68389e-11
		0.00964	-1.54239e-10	-9.53072e-11	-9.68514e-11
		0.00966	-1.54416e-10	-9.53864e-11	-9.6862e-11
		0.00968	-1.54591e-10	-9.54659e-11	-9.68708e-11
		0.0097	-1.54764e-10	-9.5546e-11	-9.68778e-11
		0.00972	-1.54934e-10	-9.56267e-11	-9.68831e-11
		0.00974	-1.55103e-10	-9.57081e-11	-9.68868e-11
		0.00976	-1.55269e-10	-9.579e-11	-9.6889e-11
		0.00978	-1.55433e-10	-9.58727e-11	-9.68899e-11
		0.0098	-1.55594e-10	-9.59561e-11	-9.68895e-11
		0.00982	-1.55754e-10	-9.60404e-11	-9.68881e-11
		0.00984	-1.55912e-10	-9.61255e-11	-9.68856e-11
		0.00986	-1.56068e-10	-9.62116e-11	-9.68823e-11
		0.00988	-1.56222e-10	-9.62987e-11	-9.68782e-11
		0.0099	-1.56374e-10	-9.6387e-11	-9.68735e-11
		0.00992	-1.56524e-10	-9.64765e-11	-9.68683e-11
		0.00994	-1.56672e-10	-9.65672e-11	-9.68627e-11
		0.00996	-1.56819e-10	-9.66591e-11	-9.68566e-11
		0.00998	-1.56963e-10	-9.67524e-11	-9.68501e-11
		0.01	-1.57105e-10	-9.6847e-11	-9.6843e-11
		0.01002	-1.57245e-10	-9.69429e-11	-9.68354e-11
		0.01004	-1.57383e-10	-9.70403e-11	-9.68272e-11
		0.01006	-1.57519e-10	-9.71389e-11	-9.68184e-11
		0.01008	-1.57652e-10	-9.72388e-11	-9.68088e-11
		0.0101	-1.57782e-10	-9.734e-11	-9.67984e-11
		0.01012	-1.5791e-10	-9.7442e-11	-9.67872e-11
		0.01014	-1.58035e-10	-9.7545e-11	-9.67752e-11
		0.01016	-1.58157e-10	-9.76486e-11	-9.67623e-11
		0.01018	-1.58276e-10	-9.77529e-11	-9.67485e-11
		0.0102	-1.58393e-10	-9.78574e-11	-9.67338e-11
		0.01022	-1.58507e-10	-9.79623e-11	-9.67183e-11
		0.01024	-1.58618e-10	-9.80672e-11	-9.6702e-11
		0.01026	-1.58727e-10	-9.8172e-11	-9.66851e-11
		0.01028	-1.58834e-10	-9.82767e-11	-9.66674e-11
		0.0103	-1.58938e-10	-9.8381e-11	-9.66492e-11
		0.01032	-1.5904e-10	-9.84849e-11	-9.66305e-11
		0.01034	-1.59141e-10	-9.85882e-11	-9.66113e-11
		0.01036	-1.59239e-10	-9.86908e-11	-9.65918e-11
		0.01038	-1.59335e-10	-9.87925e-11	-9.65719e-11
		0.0104	-1.5943e-10	-9.88934e-11	-9.65516e-11
		0.01042	-1.59522e-10	-9.89931e-11	-9.65312e-11
		0.01044	-1.59612e-10	-9.90917e-11	-9.65106e-11
		0.01046	-1.59701e-10	-9.91889e-11	-9.64898e-11
		0.01048	-1.59787e-10	-9.92846e-11	-9.64691e-11
		0.0105	-1.59872e-10	-9.93786e-11	-9.64483e-11
		0.01052	-1.59954e-10	-9.9471e-11	-9.64277e-11
		0.01054	-1.60034e-10	-9.95614e-11	-9.64073e-11
		0.01056	-1.60112e-10	-9.965e-11	-9.63871e-11
		0.01058	-1.60187e-10	-9.97367e-11	-9.63674e-11
		0.0106	-1.6026e-10	-9.98216e-11	-9.63481e-11
		0.01062	-1.60329e-10	-9.99047e-11	-9.63295e-11
		0.01064	-1.60396e-10	-9.99858e-11	-9.63116e-11
		0.01066	-1.6046e-10	-1.00065e-10	-9.62945e-11
		0.01068	-1.60522e-10	-1.00142e-10	-9.62783e-11
		0.0107	-1.6058e-10	-1.00218e-10	-9.62633e-11
		0.01072	-1.60637e-10	-1.00291e-10	-9.62494e-11
		0.01074	-1.60691e-10	-1.00362e-10	-9.62368e-11
		0.01076	-1.60742e-10	-1.00432e-10	-9.62257e-11
		0.01078	-1.60792e-10	-1.00499e-10	-9.6216e-11
		0.0108	-1.60839e-10	-1.00564e-10	-9.62078e-11
		0.01082	-1.60885e-10	-1.00628e-10	-9.62011e-11
		0.01084	-1.60929e-10	-1.00689e-10	-9.6196e-11
		0.01086	-1.60971e-10	-1.00749e-10	-9.61925e-11
		0.01088	-1.61011e-10	-1.00806e-10	-9.61904e-11
		0.0109	-1.6105e-10	-1.00862e-10	-9.619e-11
		0.01092	-1.61088e-10	-1.00915e-10	-9.61913e-11
		0.01094	-1.61126e-10	-1.00967e-10	-9.61942e-11
		0.01096	-1.61162e-10	-1.01017e-10	-9.61989e-11
		0.01098	-1.61199e-10	-1.01066e-10	-9.62054e-11
		0.011	-1.61235e-10	-1.01112e-10	-9.62138e-11
		0.01102	-1.61272e-10	-1.01157e-10	-9.62241e-11
		0.01104	-1.61309e-10	-1.01201e-10	-9.62364e-11
		0.01106	-1.61347e-10	-1.01243e-10	-9.62507e-11
		0.01108	-1.61387e-10	-1.01284e-10	-9.62671e-11
		0.0111	-1.61427e-10	-1.01324e-10	-9.62856e-11
		0.01112	-1.61469e-10	-1.01364e-10	-9.63062e-11
		0.01114	-1.61513e-10	-1.01402e-10	-9.6329e-11
		0.01116	-1.61559e-10	-1.0144e-10	-9.63539e-11
		0.01118	-1.61606e-10	-1.01477e-10	-9.63808e-11
		0.0112	-1.61655e-10	-1.01513e-10	-9.64098e-11
		0.01122	-1.61707e-10	-1.0155e-10	-9.64408e-11
		0.01124	-1.6176e-10	-1.01586e-10	-9.64738e-11
		0.01126	-1.61815e-10	-1.01622e-10	-9.65085e-11
		0.01128	-1.61872e-10	-1.01658e-10	-9.65451e-11
		0.0113	-1.61932e-10	-1.01694e-10	-9.65834e-11
		0.01132	-1.61993e-10	-1.01731e-10	-9.66233e-11
		0.01134	-1.62057e-10	-1.01768e-10	-9.66647e-11
		0.01136	-1.62123e-10	-1.01805e-10	-9.67075e-11
		0.01138	-1.6219e-10	-1.01843e-10	-9.67514e-11
		0.0114	-1.6226e-10	-1.01882e-10	-9.67965e-11
		0.01142	-1.62332e-10	-1.01921e-10	-9.68423e-11
		0.01144	-1.62406e-10	-1.01961e-10	-9.68888e-11
		0.01146	-1.62482e-10	-1.02001e-10	-9.69357e-11
		0.01148	-1.6256e-10	-1.02043e-10	-9.6983e-11
		0.0115	-1.62639e-10	-1.02086e-10	-9.70302e-11
		0.01152	-1.62721e-10	-1.0213e-10	-9.70776e-11
		0.01154	-1.62804e-10	-1.02175e-10	-9.71248e-11
		0.01156	-1.62889e-10	-1.02221e-10	-9.71718e-11
		0.01158	-1.62976e-10	-1.02269e-10	-9.72184e-11
		0.0116	-1.63064e-10	-1.02318e-10	-9.72646e-11
		0.01162	-1.63153e-10	-1.02369e-10	-9.73102e-11
		0.01164	-1.63244e-10	-1.0242e-10	-9.73551e-11
		0.01166	-1.63337e-10	-1.02473e-10	-9.73993e-11
		0.01168	-1.6343e-10	-1.02528e-10	-9.74426e-11
		0.0117	-1.63524e-10	-1.02584e-10	-9.74849e-11
		0.01172	-1.63619e-10	-1.02641e-10	-9.75262e-11
		0.01174	-1.63714e-10	-1.02699e-10	-9.75665e-11
		0.01176	-1.63808e-10	-1.02759e-10	-9.76056e-11
		0.01178	-1.63903e-10	-1.0282e-10	-9.76435e-11
		0.0118	-1.63996e-10	-1.02883e-10	-9.76802e-11
		0.01182	-1.64089e-10	-1.02946e-10	-9.77156e-11
		0.01184	-1.6418e-10	-1.03011e-10	-9.77497e-11
		0.01186	-1.6427e-10	-1.03076e-10	-9.77825e-11
		0.01188	-1.64358e-10	-1.03143e-10	-9.7814e-11
		0.0119	-1.64445e-10	-1.03211e-10	-9.7844e-11
		0.01192	-1.64529e-10	-1.0328e-10	-9.78727e-11
		0.01194	-1.64612e-10	-1.0335e-10	-9.79e-11
		0.01196	-1.64693e-10	-1.0342e-10	-9.7926e-11
		0.01198	-1.64771e-10	-1.03491e-10	-9.79506e-11
		0.012	-1.64847e-10	-1.03563e-10	-9.7974e-11
		0.01202	-1.64921e-10	-1.03636e-10	-9.79962e-11
		0.01204	-1.64993e-10	-1.03708e-10	-9.80173e-11
		0.01206	-1.65063e-10	-1.03781e-10	-9.80374e-11
		0.01208	-1.6513e-10	-1.03854e-10	-9.80565e-11
		0.0121	-1.65196e-10	-1.03926e-10	-9.80749e-11
		0.01212	-1.6526e-10	-1.03999e-10	-9.80924e-11
		0.01214	-1.65322e-10	-1.04071e-10	-9.81095e-11
		0.01216	-1.65382e-10	-1.04143e-10	-9.81259e-11
		0.01218	-1.6544e-10	-1.04214e-10	-9.81419e-11
		0.0122	-1.65497e-10	-1.04285e-10	-9.81574e-11
		0.01222	-1.65551e-10	-1.04356e-10	-9.81726e-11
		0.01224	-1.65603e-10	-1.04426e-10	-9.81873e-11
		0.01226	-1.65652e-10	-1.04495e-10	-9.82018e-11
		0.01228	-1.65699e-10	-1.04564e-10	-9.82158e-11
		0.0123	-1.65742e-10	-1.04633e-10	-9.82294e-11
		0.01232	-1.65783e-10	-1.04701e-10	-9.82426e-11
		0.01234	-1.65821e-10	-1.04768e-10	-9.82554e-11
		0.01236	-1.65856e-10	-1.04834e-10	-9.8268e-11
		0.01238	-1.65887e-10	-1.049e-10	-9.82801e-11
		0.0124	-1.65916e-10	-1.04965e-10	-9.82919e-11
		0.01242	-1.65941e-10	-1.05028e-10	-9.83033e-11
		0.01244	-1.65963e-10	-1.05091e-10	-9.83143e-11
		0.01246	-1.65983e-10	-1.05152e-10	-9.83249e-11
		0.01248	-1.65999e-10	-1.05211e-10	-9.83351e-11
		0.0125	-1.66013e-10	-1.0527e-10	-9.83449e-11
		0.01252	-1.66024e-10	-1.05327e-10	-9.83542e-11
		0.01254	-1.66032e-10	-1.05382e-10	-9.83632e-11
		0.01256	-1.66039e-10	-1.05436e-10	-9.83717e-11
		0.01258	-1.66043e-10	-1.05488e-10	-9.838e-11
		0.0126	-1.66046e-10	-1.05539e-10	-9.8388e-11
		0.01262	-1.66047e-10	-1.05588e-10	-9.83957e-11
		0.01264	-1.66047e-10	-1.05636e-10	-9.84034e-11
		0.01266	-1.66045e-10	-1.05682e-10	-9.84109e-11
		0.01268	-1.66043e-10	-1.05726e-10	-9.84185e-11
		0.0127	-1.66039e-10	-1.05769e-10	-9.84261e-11
		0.01272	-1.66035e-10	-1.0581e-10	-9.84338e-11
		0.01274	-1.6603e-10	-1.0585e-10	-9.84414e-11
		0.01276	-1.66026e-10	-1.05888e-10	-9.84493e-11
		0.01278	-1.66021e-10	-1.05925e-10	-9.84572e-11
		0.0128	-1.66018e-10	-1.0596e-10	-9.84653e-11
		0.01282	-1.66015e-10	-1.05994e-10	-9.84737e-11
		0.01284	-1.66013e-10	-1.06027e-10	-9.84825e-11
		0.01286	-1.66013e-10	-1.06058e-10	-9.84917e-11
		0.01288	-1.66014e-10	-1.06088e-10	-9.85012e-11
		0.0129	-1.66016e-10	-1.06118e-10	-9.85112e-11
		0.01292	-1.66021e-10	-1.06146e-10	-9.85216e-11
		0.01294	-1.66027e-10	-1.06174e-10	-9.85323e-11
		0.01296	-1.66036e-10	-1.062e-10	-9.85435e-11
		0.01298	-1.66046e-10	-1.06227e-10	-9.85549e-11
		0.013	-1.66058e-10	-1.06253e-10	-9.85667e-11
		0.01302	-1.66071e-10	-1.06278e-10	-9.85787e-11
		0.01304	-1.66087e-10	-1.06303e-10	-9.8591e-11
		0.01306	-1.66104e-10	-1.06328e-10	-9.86036e-11
		0.01308	-1.66122e-10	-1.06353e-10	-9.86166e-11
		0.0131	-1.66141e-10	-1.06378e-10	-9.86299e-11
		0.01312	-1.66162e-10	-1.06404e-10	-9.86437e-11
		0.01314	-1.66183e-10	-1.06429e-10	-9.8658e-11
		0.01316	-1.66206e-10	-1.06455e-10	-9.86727e-11
		0.01318	-1.66229e-10	-1.06481e-10	-9.86881e-11
		0.0132	-1.66253e-10	-1.06508e-10	-9.87041e-11
		0.01322	-1.66277e-10	-1.06535e-10	-9.87206e-11
		0.01324	-1.66303e-10	-1.06564e-10	-9.87376e-11
		0.01326	-1.66329e-10	-1.06592e-10	-9.87551e-11
		0.01328	-1.66355e-10	-1.06622e-10	-9.87729e-11
		0.0133	-1.66382e-10	-1.06652e-10	-9.87909e-11
		0.01332	-1.6641e-10	-1.06682e-10	-9.8809e-11
		0.01334	-1.66438e-10	-1.06713e-10	-9.88271e-11
		0.01336	-1.66466e-10	-1.06744e-10	-9.88452e-11
		0.01338	-1.66494e-10	-1.06776e-10	-9.8863e-11
		0.0134	-1.66522e-10	-1.06808e-10	-9.88807e-11
		0.01342	-1.66551e-10	-1.0684e-10	-9.8898e-11
		0.01344	-1.66579e-10	-1.06873e-10	-9.89151e-11
		0.01346	-1.66606e-10	-1.06906e-10	-9.89318e-11
		0.01348	-1.66633e-10	-1.06939e-10	-9.8948e-11
		0.0135	-1.66659e-10	-1.06972e-10	-9.89637e-11
		0.01352	-1.66685e-10	-1.07006e-10	-9.89786e-11
		0.01354	-1.6671e-10	-1.07039e-10	-9.89926e-11
		0.01356	-1.66735e-10	-1.07073e-10	-9.90057e-11
		0.01358	-1.6676e-10	-1.07107e-10	-9.90177e-11
		0.0136	-1.66784e-10	-1.07141e-10	-9.90284e-11
		0.01362	-1.66808e-10	-1.07175e-10	-9.90378e-11
		0.01364	-1.66831e-10	-1.07209e-10	-9.90458e-11
		0.01366	-1.66854e-10	-1.07243e-10	-9.90523e-11
		0.01368	-1.66876e-10	-1.07277e-10	-9.9057e-11
		0.0137	-1.66898e-10	-1.07311e-10	-9.90599e-11
		0.01372	-1.66919e-10	-1.07345e-10	-9.90609e-11
		0.01374	-1.6694e-10	-1.07379e-10	-9.906e-11
		0.01376	-1.66961e-10	-1.07413e-10	-9.9057e-11
		0.01378	-1.66982e-10	-1.07447e-10	-9.90518e-11
		0.0138	-1.67001e-10	-1.07481e-10	-9.90446e-11
		0.01382	-1.67021e-10	-1.07515e-10	-9.90354e-11
		0.01384	-1.6704e-10	-1.07549e-10	-9.90241e-11
		0.01386	-1.67058e-10	-1.07582e-10	-9.9011e-11
		0.01388	-1.67077e-10	-1.07616e-10	-9.89961e-11
		0.0139	-1.67094e-10	-1.07649e-10	-9.89794e-11
		0.01392	-1.67111e-10	-1.07682e-10	-9.89612e-11
		0.01394	-1.67127e-10	-1.07715e-10	-9.89414e-11
		0.01396	-1.67142e-10	-1.07747e-10	-9.89203e-11
		0.01398	-1.67157e-10	-1.07779e-10	-9.88979e-11
		0.014	-1.6717e-10	-1.0781e-10	-9.88742e-11
		0.01402	-1.67182e-10	-1.07842e-10	-9.88495e-11
		0.01404	-1.67192e-10	-1.07873e-10	-9.88237e-11
		0.01406	-1.672e-10	-1.07904e-10	-9.8797e-11
		0.01408	-1.67206e-10	-1.07936e-10	-9.87693e-11
		0.0141	-1.6721e-10	-1.07968e-10	-9.87409e-11
		0.01412	-1.67213e-10	-1.07999e-10	-9.87118e-11
		0.01414	-1.67213e-10	-1.08031e-10	-9.86821e-11
		0.01416	-1.67212e-10	-1.08064e-10	-9.86518e-11
		0.01418	-1.67209e-10	-1.08096e-10	-9.86212e-11
		0.0142	-1.67204e-10	-1.08128e-10	-9.85904e-11
		0.01422	-1.67197e-10	-1.08161e-10	-9.85595e-11
		0.01424	-1.67189e-10	-1.08193e-10	-9.85288e-11
		0.01426	-1.67178e-10	-1.08226e-10	-9.84984e-11
		0.01428	-1.67166e-10	-1.08259e-10	-9.84686e-11
		0.0143	-1.67153e-10	-1.08292e-10	-9.84397e-11
		0.01432	-1.67137e-10	-1.08324e-10	-9.84116e-11
		0.01434	-1.6712e-10	-1.08357e-10	-9.83848e-11
		0.01436	-1.67101e-10	-1.0839e-10	-9.83593e-11
		0.01438	-1.67081e-10	-1.08423e-10	-9.83352e-11
		0.0144	-1.67059e-10	-1.08456e-10	-9.83129e-11
		0.01442	-1.67036e-10	-1.08489e-10	-9.82923e-11
		0.01444	-1.67011e-10	-1.08521e-10	-9.82735e-11
		0.01446	-1.66986e-10	-1.08554e-10	-9.82568e-11
		0.01448	-1.66959e-10	-1.08587e-10	-9.82422e-11
		0.0145	-1.66932e-10	-1.0862e-10	-9.82297e-11
		0.01452	-1.66905e-10	-1.08653e-10	-9.82194e-11
		0.01454	-1.66877e-10	-1.08686e-10	-9.82114e-11
		0.01456	-1.66849e-10	-1.08718e-10	-9.82056e-11
		0.01458	-1.6682e-10	-1.0875e-10	-9.8202e-11
		0.0146	-1.66792e-10	-1.08782e-10	-9.82004e-11
		0.01462	-1.66764e-10	-1.08813e-10	-9.82006e-11
		0.01464	-1.66737e-10	-1.08844e-10	-9.82027e-11
		0.01466	-1.66711e-10	-1.08873e-10	-9.82064e-11
		0.01468	-1.66686e-10	-1.08902e-10	-9.82116e-11
		0.0147	-1.66661e-10	-1.08929e-10	-9.82183e-11
		0.01472	-1.66638e-10	-1.08954e-10	-9.82263e-11
		0.01474	-1.66616e-10	-1.08978e-10	-9.82357e-11
		0.01476	-1.66594e-10	-1.09e-10	-9.82463e-11
		0.01478	-1.66573e-10	-1.0902e-10	-9.8258e-11
		0.0148	-1.66552e-10	-1.09038e-10	-9.82709e-11
		0.01482	-1.66532e-10	-1.09053e-10	-9.82849e-11
		0.01484	-1.66511e-10	-1.09066e-10	-9.83e-11
		0.01486	-1.66491e-10	-1.09077e-10	-9.8316e-11
		0.01488	-1.66471e-10	-1.09085e-10	-9.8333e-11
		0.0149	-1.6645e-10	-1.09091e-10	-9.8351e-11
		0.01492	-1.6643e-10	-1.09093e-10	-9.83696e-11
		0.01494	-1.66409e-10	-1.09093e-10	-9.8389e-11
		0.01496	-1.66388e-10	-1.0909e-10	-9.84091e-11
		0.01498	-1.66368e-10	-1.09084e-10	-9.84297e-11
		0.015	-1.66347e-10	-1.09075e-10	-9.84508e-11
		0.01502	-1.66326e-10	-1.09062e-10	-9.84723e-11
		0.01504	-1.66306e-10	-1.09047e-10	-9.84941e-11
		0.01506	-1.66286e-10	-1.0903e-10	-9.85161e-11
		0.01508	-1.66266e-10	-1.09009e-10	-9.85381e-11
		0.0151	-1.66247e-10	-1.08985e-10	-9.85599e-11
		0.01512	-1.66229e-10	-1.08959e-10	-9.85814e-11
		0.01514	-1.66212e-10	-1.0893e-10	-9.86026e-11
		0.01516	-1.66195e-10	-1.08899e-10	-9.86233e-11
		0.01518	-1.6618e-10	-1.08865e-10	-9.86436e-11
		0.0152	-1.66165e-10	-1.08829e-10	-9.86635e-11
		0.01522	-1.66152e-10	-1.08791e-10	-9.86829e-11
		0.01524	-1.6614e-10	-1.08752e-10	-9.87019e-11
		0.01526	-1.66129e-10	-1.08712e-10	-9.87206e-11
		0.01528	-1.6612e-10	-1.08671e-10	-9.8739e-11
		0.0153	-1.66112e-10	-1.08629e-10	-9.8757e-11
		0.01532	-1.66105e-10	-1.08587e-10	-9.87747e-11
		0.01534	-1.661e-10	-1.08544e-10	-9.87921e-11
		0.01536	-1.66097e-10	-1.08502e-10	-9.88091e-11
		0.01538	-1.66095e-10	-1.0846e-10	-9.88256e-11
		0.0154	-1.66095e-10	-1.08419e-10	-9.88417e-11
		0.01542	-1.66097e-10	-1.08378e-10	-9.88574e-11
		0.01544	-1.66101e-10	-1.08339e-10	-9.88725e-11
		0.01546	-1.66107e-10	-1.08301e-10	-9.88869e-11
		0.01548	-1.66115e-10	-1.08265e-10	-9.89007e-11
		0.0155	-1.66124e-10	-1.08231e-10	-9.89137e-11
		0.01552	-1.66136e-10	-1.08198e-10	-9.8926e-11
		0.01554	-1.66149e-10	-1.08168e-10	-9.89374e-11
		0.01556	-1.66164e-10	-1.0814e-10	-9.89478e-11
		0.01558	-1.66181e-10	-1.08114e-10	-9.89572e-11
		0.0156	-1.662e-10	-1.08091e-10	-9.89654e-11
		0.01562	-1.6622e-10	-1.08071e-10	-9.89724e-11
		0.01564	-1.66241e-10	-1.08054e-10	-9.89781e-11
		0.01566	-1.66264e-10	-1.0804e-10	-9.89823e-11
		0.01568	-1.66289e-10	-1.0803e-10	-9.89849e-11
		0.0157	-1.66314e-10	-1.08023e-10	-9.89858e-11
		0.01572	-1.6634e-10	-1.08019e-10	-9.8985e-11
		0.01574	-1.66367e-10	-1.08019e-10	-9.89824e-11
		0.01576	-1.66395e-10	-1.08023e-10	-9.89779e-11
		0.01578	-1.66424e-10	-1.08031e-10	-9.89715e-11
		0.0158	-1.66453e-10	-1.08042e-10	-9.89632e-11
		0.01582	-1.66482e-10	-1.08056e-10	-9.8953e-11
		0.01584	-1.66512e-10	-1.08075e-10	-9.89409e-11
		0.01586	-1.66542e-10	-1.08096e-10	-9.8927e-11
		0.01588	-1.66571e-10	-1.08121e-10	-9.89112e-11
		0.0159	-1.66601e-10	-1.08149e-10	-9.88938e-11
		0.01592	-1.66631e-10	-1.0818e-10	-9.88747e-11
		0.01594	-1.66661e-10	-1.08215e-10	-9.88541e-11
		0.01596	-1.66691e-10	-1.08252e-10	-9.8832e-11
		0.01598	-1.66722e-10	-1.08292e-10	-9.88087e-11
		0.016	-1.66753e-10	-1.08334e-10	-9.87843e-11
		0.01602	-1.66784e-10	-1.08379e-10	-9.87591e-11
		0.01604	-1.66816e-10	-1.08425e-10	-9.8733e-11
		0.01606	-1.66848e-10	-1.08474e-10	-9.87065e-11
		0.01608	-1.6688e-10	-1.08524e-10	-9.86797e-11
		0.0161	-1.66912e-10	-1.08576e-10	-9.86528e-11
		0.01612	-1.66943e-10	-1.08629e-10	-9.86259e-11
		0.01614	-1.66973e-10	-1.08684e-10	-9.85994e-11
		0.01616	-1.67001e-10	-1.08739e-10	-9.85735e-11
		0.01618	-1.67029e-10	-1.08795e-10	-9.85483e-11
		0.0162	-1.67055e-10	-1.08852e-10	-9.8524e-11
		0.01622	-1.6708e-10	-1.0891e-10	-9.85008e-11
		0.01624	-1.67104e-10	-1.08968e-10	-9.84789e-11
		0.01626	-1.67126e-10	-1.09026e-10	-9.84582e-11
		0.01628	-1.67147e-10	-1.09085e-10	-9.8439e-11
		0.0163	-1.67167e-10	-1.09143e-10	-9.84214e-11
		0.01632	-1.67185e-10	-1.09202e-10	-9.84053e-11
		0.01634	-1.67202e-10	-1.0926e-10	-9.8391e-11
		0.01636	-1.67217e-10	-1.09318e-10	-9.83784e-11
		0.01638	-1.67231e-10	-1.09376e-10	-9.83676e-11
		0.0164	-1.67244e-10	-1.09434e-10	-9.83588e-11
		0.01642	-1.67255e-10	-1.0949e-10	-9.83519e-11
		0.01644	-1.67265e-10	-1.09547e-10	-9.83469e-11
		0.01646	-1.67273e-10	-1.09602e-10	-9.8344e-11
		0.01648	-1.67279e-10	-1.09657e-10	-9.8343e-11
		0.0165	-1.67284e-10	-1.0971e-10	-9.83441e-11
		0.01652	-1.67286e-10	-1.09762e-10	-9.83472e-11
		0.01654	-1.67287e-10	-1.09813e-10	-9.83524e-11
		0.01656	-1.67286e-10	-1.09862e-10	-9.83596e-11
		0.01658	-1.67282e-10	-1.0991e-10	-9.83689e-11
		0.0166	-1.67277e-10	-1.09957e-10	-9.83804e-11
		0.01662	-1.67269e-10	-1.10003e-10	-9.83938e-11
		0.01664	-1.67259e-10	-1.10047e-10	-9.84092e-11
		0.01666	-1.67246e-10	-1.10089e-10	-9.84264e-11
		0.01668	-1.67231e-10	-1.10131e-10	-9.84453e-11
		0.0167	-1.67213e-10	-1.10171e-10	-9.84657e-11
		0.01672	-1.67194e-10	-1.1021e-10	-9.84873e-11
		0.01674	-1.67172e-10	-1.10248e-10	-9.85101e-11
		0.01676	-1.67148e-10	-1.10285e-10	-9.85337e-11
		0.01678	-1.67123e-10	-1.1032e-10	-9.8558e-11
		0.0168	-1.67097e-10	-1.10354e-10	-9.85826e-11
		0.01682	-1.6707e-10	-1.10386e-10	-9.86073e-11
		0.01684	-1.67042e-10	-1.10417e-10	-9.86319e-11
		0.01686	-1.67014e-10	-1.10447e-10	-9.86562e-11
		0.01688	-1.66986e-10	-1.10475e-10	-9.868e-11
		0.0169	-1.66957e-10	-1.10502e-10	-9.87031e-11
		0.01692	-1.6693e-10	-1.10527e-10	-9.87255e-11
		0.01694	-1.66902e-10	-1.10551e-10	-9.87469e-11
		0.01696	-1.66876e-10	-1.10573e-10	-9.87672e-11
		0.01698	-1.6685e-10	-1.10593e-10	-9.87865e-11
		0.017	-1.66826e-10	-1.10612e-10	-9.88045e-11
		0.01702	-1.66802e-10	-1.10629e-10	-9.88213e-11
		0.01704	-1.66779e-10	-1.10644e-10	-9.88369e-11
		0.01706	-1.66757e-10	-1.10658e-10	-9.88513e-11
		0.01708	-1.66736e-10	-1.1067e-10	-9.88645e-11
		0.0171	-1.66716e-10	-1.10681e-10	-9.88766e-11
		0.01712	-1.66697e-10	-1.1069e-10	-9.88875e-11
		0.01714	-1.66679e-10	-1.10697e-10	-9.88973e-11
		0.01716	-1.66663e-10	-1.10702e-10	-9.8906e-11
		0.01718	-1.66648e-10	-1.10706e-10	-9.89135e-11
		0.0172	-1.66634e-10	-1.10708e-10	-9.892e-11
		0.01722	-1.66623e-10	-1.10708e-10	-9.89254e-11
		0.01724	-1.66613e-10	-1.10707e-10	-9.89297e-11
		0.01726	-1.66605e-10	-1.10704e-10	-9.8933e-11
		0.01728	-1.66599e-10	-1.10699e-10	-9.89354e-11
		0.0173	-1.66595e-10	-1.10693e-10	-9.89368e-11
		0.01732	-1.66592e-10	-1.10685e-10	-9.89375e-11
		0.01734	-1.66592e-10	-1.10675e-10	-9.89376e-11
		0.01736	-1.66594e-10	-1.10664e-10	-9.89373e-11
		0.01738	-1.66599e-10	-1.10651e-10	-9.89367e-11
		0.0174	-1.66606e-10	-1.10637e-10	-9.8936e-11
		0.01742	-1.66615e-10	-1.10621e-10	-9.89352e-11
		0.01744	-1.66627e-10	-1.10605e-10	-9.89347e-11
		0.01746	-1.66641e-10	-1.10588e-10	-9.89344e-11
		0.01748	-1.66658e-10	-1.1057e-10	-9.89345e-11
		0.0175	-1.66677e-10	-1.10552e-10	-9.89352e-11
		0.01752	-1.66698e-10	-1.10533e-10	-9.89366e-11
		0.01754	-1.66722e-10	-1.10515e-10	-9.8939e-11
		0.01756	-1.66747e-10	-1.10496e-10	-9.89425e-11
		0.01758	-1.66774e-10	-1.10477e-10	-9.89474e-11
		0.0176	-1.66803e-10	-1.10459e-10	-9.89538e-11
		0.01762	-1.66833e-10	-1.10442e-10	-9.89618e-11
		0.01764	-1.66863e-10	-1.10425e-10	-9.89716e-11
		0.01766	-1.66895e-10	-1.10409e-10	-9.89832e-11
		0.01768	-1.66926e-10	-1.10394e-10	-9.89966e-11
		0.0177	-1.66958e-10	-1.10381e-10	-9.90117e-11
		0.01772	-1.6699e-10	-1.10368e-10	-9.90284e-11
		0.01774	-1.67022e-10	-1.10357e-10	-9.90467e-11
		0.01776	-1.67054e-10	-1.10348e-10	-9.90665e-11
		0.01778	-1.67086e-10	-1.10341e-10	-9.90876e-11
		0.0178	-1.67118e-10	-1.10336e-10	-9.911e-11
		0.01782	-1.67149e-10	-1.10332e-10	-9.91334e-11
		0.01784	-1.6718e-10	-1.10331e-10	-9.91577e-11
		0.01786	-1.6721e-10	-1.10332e-10	-9.91826e-11
		0.01788	-1.6724e-10	-1.10336e-10	-9.92081e-11
		0.0179	-1.67269e-10	-1.10342e-10	-9.92337e-11
		0.01792	-1.67297e-10	-1.1035e-10	-9.92594e-11
		0.01794	-1.67324e-10	-1.10361e-10	-9.9285e-11
		0.01796	-1.67351e-10	-1.10373e-10	-9.93102e-11
		0.01798	-1.67375e-10	-1.10388e-10	-9.93348e-11
		0.018	-1.67399e-10	-1.10405e-10	-9.93585e-11
		0.01802	-1.67421e-10	-1.10423e-10	-9.93812e-11
		0.01804	-1.67443e-10	-1.10444e-10	-9.94025e-11
		0.01806	-1.67462e-10	-1.10466e-10	-9.94223e-11
		0.01808	-1.67481e-10	-1.1049e-10	-9.94405e-11
		0.0181	-1.67499e-10	-1.10515e-10	-9.94569e-11
		0.01812	-1.67516e-10	-1.10541e-10	-9.94715e-11
		0.01814	-1.67532e-10	-1.10569e-10	-9.94842e-11
		0.01816	-1.67547e-10	-1.10597e-10	-9.9495e-11
		0.01818	-1.67561e-10	-1.10627e-10	-9.95038e-11
		0.0182	-1.67573e-10	-1.10656e-10	-9.95106e-11
		0.01822	-1.67584e-10	-1.10686e-10	-9.95155e-11
		0.01824	-1.67595e-10	-1.10716e-10	-9.95184e-11
		0.01826	-1.67603e-10	-1.10746e-10	-9.95195e-11
		0.01828	-1.67611e-10	-1.10775e-10	-9.95188e-11
		0.0183	-1.67617e-10	-1.10803e-10	-9.95165e-11
		0.01832	-1.67622e-10	-1.10831e-10	-9.95126e-11
		0.01834	-1.67627e-10	-1.10857e-10	-9.95072e-11
		0.01836	-1.6763e-10	-1.10882e-10	-9.95004e-11
		0.01838	-1.67633e-10	-1.10906e-10	-9.94923e-11
		0.0184	-1.67635e-10	-1.10928e-10	-9.9483e-11
		0.01842	-1.67636e-10	-1.10948e-10	-9.94725e-11
		0.01844	-1.67636e-10	-1.10967e-10	-9.94612e-11
		0.01846	-1.67637e-10	-1.10983e-10	-9.94491e-11
		0.01848	-1.67637e-10	-1.10998e-10	-9.94362e-11
		0.0185	-1.67636e-10	-1.11011e-10	-9.94227e-11
		0.01852	-1.67635e-10	-1.11022e-10	-9.94089e-11
		0.01854	-1.67635e-10	-1.11032e-10	-9.93947e-11
		0.01856	-1.67634e-10	-1.11039e-10	-9.93804e-11
		0.01858	-1.67633e-10	-1.11045e-10	-9.9366e-11
		0.0186	-1.67632e-10	-1.11049e-10	-9.93517e-11
		0.01862	-1.67631e-10	-1.11052e-10	-9.93377e-11
		0.01864	-1.67631e-10	-1.11053e-10	-9.93241e-11
		0.01866	-1.6763e-10	-1.11051e-10	-9.93112e-11
		0.01868	-1.6763e-10	-1.11048e-10	-9.92991e-11
		0.0187	-1.6763e-10	-1.11044e-10	-9.92881e-11
		0.01872	-1.6763e-10	-1.11038e-10	-9.92782e-11
		0.01874	-1.6763e-10	-1.1103e-10	-9.92698e-11
		0.01876	-1.6763e-10	-1.1102e-10	-9.9263e-11
		0.01878	-1.67631e-10	-1.11009e-10	-9.92578e-11
		0.0188	-1.67632e-10	-1.10997e-10	-9.92545e-11
		0.01882	-1.67633e-10	-1.10984e-10	-9.92529e-11
		0.01884	-1.67635e-10	-1.1097e-10	-9.92532e-11
		0.01886	-1.67637e-10	-1.10954e-10	-9.92553e-11
		0.01888	-1.6764e-10	-1.10938e-10	-9.92592e-11
		0.0189	-1.67643e-10	-1.10921e-10	-9.9265e-11
		0.01892	-1.67647e-10	-1.10904e-10	-9.92723e-11
		0.01894	-1.67653e-10	-1.10886e-10	-9.92813e-11
		0.01896	-1.67659e-10	-1.10868e-10	-9.92917e-11
		0.01898	-1.67667e-10	-1.1085e-10	-9.93034e-11
		0.019	-1.67676e-10	-1.10831e-10	-9.93162e-11
		0.01902	-1.67687e-10	-1.10813e-10	-9.93298e-11
		0.01904	-1.67699e-10	-1.10795e-10	-9.93442e-11
		0.01906	-1.67713e-10	-1.10778e-10	-9.93591e-11
		0.01908	-1.67728e-10	-1.10761e-10	-9.93744e-11
		0.0191	-1.67744e-10	-1.10745e-10	-9.93899e-11
		0.01912	-1.67762e-10	-1.1073e-10	-9.94056e-11
		0.01914	-1.67781e-10	-1.10716e-10	-9.94212e-11
		0.01916	-1.67801e-10	-1.10703e-10	-9.94367e-11
		0.01918	-1.67821e-10	-1.10692e-10	-9.94517e-11
		0.0192	-1.67842e-10	-1.10682e-10	-9.94663e-11
		0.01922	-1.67864e-10	-1.10674e-10	-9.94801e-11
		0.01924	-1.67887e-10	-1.10667e-10	-9.9493e-11
		0.01926	-1.6791e-10	-1.10662e-10	-9.9505e-11
		0.01928	-1.67932e-10	-1.10659e-10	-9.95157e-11
		0.0193	-1.67955e-10	-1.10657e-10	-9.95251e-11
		0.01932	-1.67978e-10	-1.10658e-10	-9.9533e-11
		0.01934	-1.68e-10	-1.1066e-10	-9.95393e-11
		0.01936	-1.68021e-10	-1.10664e-10	-9.95438e-11
		0.01938	-1.6804e-10	-1.1067e-10	-9.95464e-11
		0.0194	-1.68058e-10	-1.10678e-10	-9.95469e-11
		0.01942	-1.68074e-10	-1.10688e-10	-9.95454e-11
		0.01944	-1.68088e-10	-1.107e-10	-9.95417e-11
		0.01946	-1.68099e-10	-1.10713e-10	-9.95359e-11
		0.01948	-1.68109e-10	-1.10729e-10	-9.95279e-11
		0.0195	-1.68116e-10	-1.10746e-10	-9.95176e-11
		0.01952	-1.68121e-10	-1.10766e-10	-9.95052e-11
		0.01954	-1.68123e-10	-1.10786e-10	-9.94906e-11
		0.01956	-1.68124e-10	-1.10809e-10	-9.94738e-11
		0.01958	-1.68122e-10	-1.10832e-10	-9.94547e-11
		0.0196	-1.68118e-10	-1.10857e-10	-9.94336e-11
		0.01962	-1.68113e-10	-1.10884e-10	-9.94105e-11
		0.01964	-1.68106e-10	-1.10911e-10	-9.93855e-11
		0.01966	-1.68097e-10	-1.10939e-10	-9.93587e-11
		0.01968	-1.68087e-10	-1.10969e-10	-9.93303e-11
		0.0197	-1.68076e-10	-1.10999e-10	-9.93002e-11
		0.01972	-1.68063e-10	-1.11031e-10	-9.92687e-11
		0.01974	-1.68049e-10	-1.11063e-10	-9.92358e-11
		0.01976	-1.68034e-10	-1.11096e-10	-9.92014e-11
		0.01978	-1.68018e-10	-1.11129e-10	-9.91656e-11
		0.0198	-1.68001e-10	-1.11163e-10	-9.91286e-11
		0.01982	-1.67983e-10	-1.11198e-10	-9.90904e-11
		0.01984	-1.67964e-10	-1.11233e-10	-9.90512e-11
		0.01986	-1.67945e-10	-1.11269e-10	-9.90113e-11
		0.01988	-1.67924e-10	-1.11305e-10	-9.89709e-11
		0.0199	-1.67903e-10	-1.11342e-10	-9.89301e-11
		0.01992	-1.67881e-10	-1.11379e-10	-9.88892e-11
		0.01994	-1.67859e-10	-1.11416e-10	-9.88484e-11
		0.01996	-1.67836e-10	-1.11454e-10	-9.88079e-11
		0.01998	-1.67813e-10	-1.11492e-10	-9.8768e-11
		0.02	-1.6779e-10	-1.11529e-10	-9.87288e-11
		0.02002	-1.67766e-10	-1.11567e-10	-9.86905e-11
		0.02004	-1.67743e-10	-1.11605e-10	-9.86534e-11
		0.02006	-1.6772e-10	-1.11642e-10	-9.86175e-11
		0.02008	-1.67697e-10	-1.11679e-10	-9.8583e-11
		0.0201	-1.67675e-10	-1.11715e-10	-9.855e-11
		0.02012	-1.67653e-10	-1.11751e-10	-9.85186e-11
		0.02014	-1.67633e-10	-1.11786e-10	-9.8489e-11
		0.02016	-1.67613e-10	-1.1182e-10	-9.84611e-11
		0.02018	-1.67595e-10	-1.11854e-10	-9.84351e-11
		0.0202	-1.67579e-10	-1.11887e-10	-9.84111e-11
		0.02022	-1.67564e-10	-1.11919e-10	-9.83892e-11
		0.02024	-1.67551e-10	-1.11951e-10	-9.83695e-11
		0.02026	-1.6754e-10	-1.11981e-10	-9.83519e-11
		0.02028	-1.67531e-10	-1.12012e-10	-9.83367e-11
		0.0203	-1.67524e-10	-1.12041e-10	-9.83237e-11
		0.02032	-1.67519e-10	-1.1207e-10	-9.83132e-11
		0.02034	-1.67516e-10	-1.12098e-10	-9.83051e-11
		0.02036	-1.67515e-10	-1.12125e-10	-9.82995e-11
		0.02038	-1.67515e-10	-1.12152e-10	-9.82964e-11
		0.0204	-1.67518e-10	-1.12178e-10	-9.82957e-11
		0.02042	-1.67522e-10	-1.12203e-10	-9.82973e-11
		0.02044	-1.67529e-10	-1.12227e-10	-9.83012e-11
		0.02046	-1.67537e-10	-1.12251e-10	-9.83072e-11
		0.02048	-1.67547e-10	-1.12273e-10	-9.83153e-11
		0.0205	-1.6756e-10	-1.12295e-10	-9.83253e-11
		0.02052	-1.67574e-10	-1.12315e-10	-9.83372e-11
		0.02054	-1.6759e-10	-1.12334e-10	-9.83508e-11
		0.02056	-1.67608e-10	-1.12353e-10	-9.8366e-11
		0.02058	-1.67628e-10	-1.1237e-10	-9.83826e-11
		0.0206	-1.6765e-10	-1.12386e-10	-9.84005e-11
		0.02062	-1.67674e-10	-1.12401e-10	-9.84195e-11
		0.02064	-1.677e-10	-1.12415e-10	-9.84395e-11
		0.02066	-1.67728e-10	-1.12429e-10	-9.84603e-11
		0.02068	-1.67757e-10	-1.12441e-10	-9.84818e-11
		0.0207	-1.67789e-10	-1.12453e-10	-9.85038e-11
		0.02072	-1.67822e-10	-1.12464e-10	-9.85263e-11
		0.02074	-1.67857e-10	-1.12474e-10	-9.85491e-11
		0.02076	-1.67894e-10	-1.12483e-10	-9.85722e-11
		0.02078	-1.67932e-10	-1.12492e-10	-9.85954e-11
		0.0208	-1.67972e-10	-1.12499e-10	-9.86186e-11
		0.02082	-1.68012e-10	-1.12506e-10	-9.86418e-11
		0.02084	-1.68054e-10	-1.12512e-10	-9.86647e-11
		0.02086	-1.68095e-10	-1.12517e-10	-9.86875e-11
		0.02088	-1.68137e-10	-1.12521e-10	-9.87098e-11
		0.0209	-1.68179e-10	-1.12525e-10	-9.87316e-11
		0.02092	-1.6822e-10	-1.12527e-10	-9.87528e-11
		0.02094	-1.68261e-10	-1.1253e-10	-9.87734e-11
		0.02096	-1.683e-10	-1.12531e-10	-9.87931e-11
		0.02098	-1.68338e-10	-1.12533e-10	-9.88119e-11
		0.021	-1.68375e-10	-1.12534e-10	-9.88297e-11
		0.02102	-1.6841e-10	-1.12535e-10	-9.88464e-11
		0.02104	-1.68443e-10	-1.12536e-10	-9.88618e-11
		0.02106	-1.68474e-10	-1.12538e-10	-9.88758e-11
		0.02108	-1.68502e-10	-1.12539e-10	-9.88883e-11
		0.0211	-1.68528e-10	-1.12541e-10	-9.88993e-11
		0.02112	-1.68552e-10	-1.12543e-10	-9.89085e-11
		0.02114	-1.68573e-10	-1.12546e-10	-9.89158e-11
		0.02116	-1.68591e-10	-1.1255e-10	-9.89213e-11
		0.02118	-1.68606e-10	-1.12554e-10	-9.89249e-11
		0.0212	-1.68618e-10	-1.12559e-10	-9.89266e-11
		0.02122	-1.68627e-10	-1.12566e-10	-9.89262e-11
		0.02124	-1.68632e-10	-1.12573e-10	-9.89239e-11
		0.02126	-1.68635e-10	-1.12581e-10	-9.89195e-11
		0.02128	-1.68635e-10	-1.1259e-10	-9.89132e-11
		0.0213	-1.68631e-10	-1.12601e-10	-9.8905e-11
		0.02132	-1.68625e-10	-1.12612e-10	-9.8895e-11
		0.02134	-1.68615e-10	-1.12625e-10	-9.88832e-11
		0.02136	-1.68602e-10	-1.12639e-10	-9.88699e-11
		0.02138	-1.68587e-10	-1.12654e-10	-9.88552e-11
		0.0214	-1.68568e-10	-1.1267e-10	-9.88393e-11
		0.02142	-1.68548e-10	-1.12686e-10	-9.88225e-11
		0.02144	-1.68525e-10	-1.12704e-10	-9.88049e-11
		0.02146	-1.68501e-10	-1.12722e-10	-9.87868e-11
		0.02148	-1.68475e-10	-1.12741e-10	-9.87684e-11
		0.0215	-1.68447e-10	-1.1276e-10	-9.875e-11
		0.02152	-1.68418e-10	-1.12779e-10	-9.87318e-11
		0.02154	-1.68388e-10	-1.12799e-10	-9.87142e-11
		0.02156	-1.68358e-10	-1.1282e-10	-9.86973e-11
		0.02158	-1.68326e-10	-1.12841e-10	-9.86814e-11
		0.0216	-1.68294e-10	-1.12862e-10	-9.86666e-11
		0.02162	-1.68261e-10	-1.12884e-10	-9.86531e-11
		0.02164	-1.68228e-10	-1.12906e-10	-9.86412e-11
		0.02166	-1.68194e-10	-1.12929e-10	-9.86311e-11
		0.02168	-1.6816e-10	-1.12951e-10	-9.86231e-11
		0.0217	-1.68125e-10	-1.12973e-10	-9.86175e-11
		0.02172	-1.6809e-10	-1.12996e-10	-9.86146e-11
		0.02174	-1.68056e-10	-1.13018e-10	-9.86146e-11
		0.02176	-1.68021e-10	-1.1304e-10	-9.86177e-11
		0.02178	-1.67988e-10	-1.13062e-10	-9.8624e-11
		0.0218	-1.67955e-10	-1.13083e-10	-9.86337e-11
		0.02182	-1.67923e-10	-1.13104e-10	-9.86467e-11
		0.02184	-1.67893e-10	-1.13124e-10	-9.8663e-11
		0.02186	-1.67863e-10	-1.13143e-10	-9.86826e-11
		0.02188	-1.67835e-10	-1.13162e-10	-9.87053e-11
		0.0219	-1.67809e-10	-1.13179e-10	-9.8731e-11
		0.02192	-1.67784e-10	-1.13196e-10	-9.87597e-11
		0.02194	-1.67761e-10	-1.13212e-10	-9.87911e-11
		0.02196	-1.67739e-10	-1.13227e-10	-9.88251e-11
		0.02198	-1.6772e-10	-1.1324e-10	-9.88616e-11
		0.022	-1.67702e-10	-1.13252e-10	-9.89004e-11
		0.02202	-1.67685e-10	-1.13263e-10	-9.89412e-11
		0.02204	-1.6767e-10	-1.13273e-10	-9.89838e-11
		0.02206	-1.67657e-10	-1.13281e-10	-9.90279e-11
		0.02208	-1.67645e-10	-1.13288e-10	-9.90733e-11
		0.0221	-1.67635e-10	-1.13293e-10	-9.91196e-11
		0.02212	-1.67626e-10	-1.13297e-10	-9.91668e-11
		0.02214	-1.67618e-10	-1.13299e-10	-9.92143e-11
		0.02216	-1.67612e-10	-1.13299e-10	-9.92621e-11
		0.02218	-1.67607e-10	-1.13298e-10	-9.93098e-11
		0.0222	-1.67603e-10	-1.13295e-10	-9.93572e-11
		0.02222	-1.67601e-10	-1.1329e-10	-9.94041e-11
		0.02224	-1.67601e-10	-1.13283e-10	-9.94502e-11
		0.02226	-1.67603e-10	-1.13275e-10	-9.94952e-11
		0.02228	-1.67606e-10	-1.13265e-10	-9.9539e-11
		0.0223	-1.67611e-10	-1.13252e-10	-9.95813e-11
		0.02232	-1.67619e-10	-1.13238e-10	-9.9622e-11
		0.02234	-1.67629e-10	-1.13222e-10	-9.96608e-11
		0.02236	-1.6764e-10	-1.13204e-10	-9.96977e-11
		0.02238	-1.67654e-10	-1.13185e-10	-9.97324e-11
		0.0224	-1.6767e-10	-1.13164e-10	-9.97648e-11
		0.02242	-1.67687e-10	-1.13141e-10	-9.9795e-11
		0.02244	-1.67705e-10	-1.13117e-10	-9.98226e-11
		0.02246	-1.67724e-10	-1.13091e-10	-9.98479e-11
		0.02248	-1.67745e-10	-1.13065e-10	-9.98707e-11
		0.0225	-1.67766e-10	-1.13037e-10	-9.9891e-11
		0.02252	-1.67787e-10	-1.13009e-10	-9.99087e-11
		0.02254	-1.6781e-10	-1.1298e-10	-9.99239e-11
		0.02256	-1.67832e-10	-1.12951e-10	-9.99365e-11
		0.02258	-1.67855e-10	-1.12921e-10	-9.99465e-11
		0.0226	-1.67878e-10	-1.12891e-10	-9.9954e-11
		0.02262	-1.67901e-10	-1.12861e-10	-9.99588e-11
		0.02264	-1.67924e-10	-1.12831e-10	-9.9961e-11
		0.02266	-1.67946e-10	-1.12802e-10	-9.99608e-11
		0.02268	-1.67968e-10	-1.12774e-10	-9.9958e-11
		0.0227	-1.67988e-10	-1.12746e-10	-9.9953e-11
		0.02272	-1.68008e-10	-1.1272e-10	-9.99458e-11
		0.02274	-1.68027e-10	-1.12694e-10	-9.99365e-11
		0.02276	-1.68044e-10	-1.1267e-10	-9.99255e-11
		0.02278	-1.68059e-10	-1.12648e-10	-9.99128e-11
		0.0228	-1.68073e-10	-1.12627e-10	-9.98986e-11
		0.02282	-1.68085e-10	-1.12608e-10	-9.98835e-11
		0.02284	-1.68095e-10	-1.1259e-10	-9.98674e-11
		0.02286	-1.68103e-10	-1.12575e-10	-9.98507e-11
		0.02288	-1.6811e-10	-1.12562e-10	-9.98336e-11
		0.0229	-1.68115e-10	-1.12551e-10	-9.98162e-11
		0.02292	-1.68119e-10	-1.12542e-10	-9.97988e-11
		0.02294	-1.68121e-10	-1.12536e-10	-9.97814e-11
		0.02296	-1.68122e-10	-1.12532e-10	-9.97644e-11
		0.02298	-1.68123e-10	-1.1253e-10	-9.97479e-11
		0.023	-1.68122e-10	-1.1253e-10	-9.9732e-11
		0.02302	-1.6812e-10	-1.12532e-10	-9.97169e-11
		0.02304	-1.68118e-10	-1.12537e-10	-9.97029e-11
		0.02306	-1.68115e-10	-1.12544e-10	-9.96901e-11
		0.02308	-1.68111e-10	-1.12553e-10	-9.96787e-11
		0.0231	-1.68107e-10	-1.12564e-10	-9.9669e-11
		0.02312	-1.68102e-10	-1.12577e-10	-9.96611e-11
		0.02314	-1.68097e-10	-1.12592e-10	-9.96552e-11
		0.02316	-1.68091e-10	-1.12609e-10	-9.96514e-11
		0.02318	-1.68086e-10	-1.12627e-10	-9.96501e-11
		0.0232	-1.68081e-10	-1.12648e-10	-9.96511e-11
		0.02322	-1.68076e-10	-1.1267e-10	-9.96545e-11
		0.02324	-1.6807e-10	-1.12694e-10	-9.96605e-11
		0.02326	-1.68066e-10	-1.1272e-10	-9.9669e-11
		0.02328	-1.68061e-10	-1.12748e-10	-9.96798e-11
		0.0233	-1.68057e-10	-1.12777e-10	-9.96929e-11
		0.02332	-1.68053e-10	-1.12807e-10	-9.97083e-11
		0.02334	-1.68049e-10	-1.12838e-10	-9.97258e-11
		0.02336	-1.68046e-10	-1.12871e-10	-9.97451e-11
		0.02338	-1.68044e-10	-1.12904e-10	-9.97663e-11
		0.0234	-1.68042e-10	-1.12939e-10	-9.97891e-11
		0.02342	-1.6804e-10	-1.12974e-10	-9.98133e-11
		0.02344	-1.68039e-10	-1.1301e-10	-9.98387e-11
		0.02346	-1.68038e-10	-1.13047e-10	-9.98651e-11
		0.02348	-1.68038e-10	-1.13084e-10	-9.98925e-11
		0.0235	-1.68038e-10	-1.13122e-10	-9.99206e-11
		0.02352	-1.68038e-10	-1.13159e-10	-9.99493e-11
		0.02354	-1.68038e-10	-1.13197e-10	-9.99786e-11
		0.02356	-1.68039e-10	-1.13235e-10	-1.00008e-10
		0.02358	-1.68039e-10	-1.13272e-10	-1.00038e-10
		0.0236	-1.6804e-10	-1.13309e-10	-1.00069e-10
		0.02362	-1.68041e-10	-1.13346e-10	-1.00099e-10
		0.02364	-1.68043e-10	-1.13382e-10	-1.0013e-10
		0.02366	-1.68044e-10	-1.13418e-10	-1.00162e-10
		0.02368	-1.68047e-10	-1.13453e-10	-1.00193e-10
		0.0237	-1.68049e-10	-1.13487e-10	-1.00225e-10
		0.02372	-1.68053e-10	-1.1352e-10	-1.00257e-10
		0.02374	-1.68057e-10	-1.13553e-10	-1.00288e-10
		0.02376	-1.68061e-10	-1.13584e-10	-1.0032e-10
		0.02378	-1.68065e-10	-1.13615e-10	-1.00352e-10
		0.0238	-1.6807e-10	-1.13644e-10	-1.00384e-10
		0.02382	-1.68076e-10	-1.13672e-10	-1.00415e-10
		0.02384	-1.68081e-10	-1.13698e-10	-1.00447e-10
		0.02386	-1.68087e-10	-1.13723e-10	-1.00478e-10
		0.02388	-1.68093e-10	-1.13747e-10	-1.0051e-10
		0.0239	-1.681e-10	-1.13769e-10	-1.00541e-10
		0.02392	-1.68107e-10	-1.13789e-10	-1.00573e-10
		0.02394	-1.68114e-10	-1.13808e-10	-1.00604e-10
		0.02396	-1.68122e-10	-1.13825e-10	-1.00635e-10
		0.02398	-1.6813e-10	-1.13841e-10	-1.00666e-10
		0.024	-1.68138e-10	-1.13855e-10	-1.00696e-10
		0.02402	-1.68146e-10	-1.13866e-10	-1.00727e-10
		0.02404	-1.68155e-10	-1.13877e-10	-1.00758e-10
		0.02406	-1.68163e-10	-1.13885e-10	-1.00788e-10
		0.02408	-1.68172e-10	-1.13892e-10	-1.00818e-10
		0.0241	-1.6818e-10	-1.13897e-10	-1.00848e-10
		0.02412	-1.68187e-10	-1.139e-10	-1.00877e-10
		0.02414	-1.68194e-10	-1.13902e-10	-1.00907e-10
		0.02416	-1.68201e-10	-1.13902e-10	-1.00935e-10
		0.02418	-1.68207e-10	-1.13901e-10	-1.00963e-10
		0.0242	-1.68213e-10	-1.13898e-10	-1.00991e-10
		0.02422	-1.68219e-10	-1.13894e-10	-1.01017e-10
		0.02424	-1.68223e-10	-1.13889e-10	-1.01043e-10
		0.02426	-1.68228e-10	-1.13882e-10	-1.01068e-10
		0.02428	-1.68231e-10	-1.13875e-10	-1.01092e-10
		0.0243	-1.68234e-10	-1.13866e-10	-1.01115e-10
		0.02432	-1.68236e-10	-1.13857e-10	-1.01137e-10
		0.02434	-1.68236e-10	-1.13846e-10	-1.01158e-10
		0.02436	-1.68235e-10	-1.13835e-10	-1.01177e-10
		0.02438	-1.68234e-10	-1.13822e-10	-1.01195e-10
		0.0244	-1.68231e-10	-1.13808e-10	-1.01212e-10
		0.02442	-1.68227e-10	-1.13794e-10	-1.01227e-10
		0.02444	-1.68222e-10	-1.13778e-10	-1.01241e-10
		0.02446	-1.68216e-10	-1.13762e-10	-1.01253e-10
		0.02448	-1.6821e-10	-1.13745e-10	-1.01264e-10
		0.0245	-1.68203e-10	-1.13727e-10	-1.01273e-10
		0.02452	-1.68195e-10	-1.13709e-10	-1.01281e-10
		0.02454	-1.68188e-10	-1.1369e-10	-1.01287e-10
		0.02456	-1.6818e-10	-1.13671e-10	-1.01292e-10
		0.02458	-1.68171e-10	-1.13651e-10	-1.01295e-10
		0.0246	-1.68162e-10	-1.13631e-10	-1.01296e-10
		0.02462	-1.68152e-10	-1.13611e-10	-1.01297e-10
		0.02464	-1.68141e-10	-1.13591e-10	-1.01295e-10
		0.02466	-1.6813e-10	-1.1357e-10	-1.01293e-10
		0.02468	-1.68118e-10	-1.13549e-10	-1.01289e-10
		0.0247	-1.68106e-10	-1.13528e-10	-1.01284e-10
		0.02472	-1.68094e-10	-1.13507e-10	-1.01278e-10
		0.02474	-1.68082e-10	-1.13486e-10	-1.0127e-10
		0.02476	-1.68071e-10	-1.13464e-10	-1.01262e-10
		0.02478	-1.6806e-10	-1.13444e-10	-1.01253e-10
		0.0248	-1.6805e-10	-1.13423e-10	-1.01243e-10
		0.02482	-1.68041e-10	-1.13403e-10	-1.01232e-10
		0.02484	-1.68033e-10	-1.13383e-10	-1.01221e-10
		0.02486	-1.68027e-10	-1.13364e-10	-1.0121e-10
		0.02488	-1.68023e-10	-1.13345e-10	-1.01199e-10
		0.0249	-1.6802e-10	-1.13327e-10	-1.01187e-10
		0.02492	-1.68018e-10	-1.1331e-10	-1.01176e-10
		0.02494	-1.68016e-10	-1.13293e-10	-1.01165e-10
		0.02496	-1.68016e-10	-1.13277e-10	-1.01155e-10
		0.02498	-1.68016e-10	-1.13263e-10	-1.01145e-10
		0.025	-1.68016e-10	-1.13249e-10	-1.01135e-10
		0.02502	-1.68016e-10	-1.13237e-10	-1.01127e-10
		0.02504	-1.68017e-10	-1.13227e-10	-1.01119e-10
		0.02506	-1.68017e-10	-1.13217e-10	-1.01112e-10
		0.02508	-1.68017e-10	-1.1321e-10	-1.01107e-10
		0.0251	-1.68017e-10	-1.13204e-10	-1.01102e-10
		0.02512	-1.68017e-10	-1.132e-10	-1.01099e-10
		0.02514	-1.68016e-10	-1.13198e-10	-1.01097e-10
		0.02516	-1.68015e-10	-1.13198e-10	-1.01095e-10
		0.02518	-1.68014e-10	-1.13199e-10	-1.01096e-10
		0.0252	-1.68012e-10	-1.13203e-10	-1.01097e-10
		0.02522	-1.68009e-10	-1.13208e-10	-1.011e-10
		0.02524	-1.68006e-10	-1.13215e-10	-1.01103e-10
		0.02526	-1.68003e-10	-1.13224e-10	-1.01109e-10
		0.02528	-1.67999e-10	-1.13234e-10	-1.01115e-10
		0.0253	-1.67994e-10	-1.13245e-10	-1.01122e-10
		0.02532	-1.6799e-10	-1.13259e-10	-1.01131e-10
		0.02534	-1.67985e-10	-1.13273e-10	-1.01141e-10
		0.02536	-1.6798e-10	-1.13289e-10	-1.01152e-10
		0.02538	-1.67975e-10	-1.13305e-10	-1.01164e-10
		0.0254	-1.6797e-10	-1.13323e-10	-1.01178e-10
		0.02542	-1.67965e-10	-1.13341e-10	-1.01192e-10
		0.02544	-1.6796e-10	-1.1336e-10	-1.01207e-10
		0.02546	-1.67954e-10	-1.1338e-10	-1.01224e-10
		0.02548	-1.67947e-10	-1.134e-10	-1.01241e-10
		0.0255	-1.67941e-10	-1.1342e-10	-1.01259e-10
		0.02552	-1.67933e-10	-1.13441e-10	-1.01278e-10
		0.02554	-1.67925e-10	-1.13463e-10	-1.01297e-10
		0.02556	-1.67917e-10	-1.13485e-10	-1.01316e-10
		0.02558	-1.67908e-10	-1.13506e-10	-1.01335e-10
		0.0256	-1.67899e-10	-1.13529e-10	-1.01354e-10
		0.02562	-1.6789e-10	-1.13551e-10	-1.01373e-10
		0.02564	-1.67881e-10	-1.13573e-10	-1.01391e-10
		0.02566	-1.67873e-10	-1.13595e-10	-1.01408e-10
		0.02568	-1.67864e-10	-1.13617e-10	-1.01424e-10
		0.0257	-1.67857e-10	-1.13638e-10	-1.01439e-10
		0.02572	-1.6785e-10	-1.1366e-10	-1.01453e-10
		0.02574	-1.67844e-10	-1.13682e-10	-1.01465e-10
		0.02576	-1.67839e-10	-1.13703e-10	-1.01476e-10
		0.02578	-1.67834e-10	-1.13724e-10	-1.01486e-10
		0.0258	-1.67831e-10	-1.13746e-10	-1.01494e-10
		0.02582	-1.67827e-10	-1.13767e-10	-1.015e-10
		0.02584	-1.67825e-10	-1.13788e-10	-1.01504e-10
		0.02586	-1.67822e-10	-1.13809e-10	-1.01507e-10
		0.02588	-1.6782e-10	-1.1383e-10	-1.01508e-10
		0.0259	-1.67818e-10	-1.13851e-10	-1.01508e-10
		0.02592	-1.67816e-10	-1.13873e-10	-1.01505e-10
		0.02594	-1.67813e-10	-1.13894e-10	-1.01501e-10
		0.02596	-1.67811e-10	-1.13916e-10	-1.01494e-10
		0.02598	-1.67809e-10	-1.13938e-10	-1.01486e-10
		0.026	-1.67806e-10	-1.13961e-10	-1.01476e-10
		0.02602	-1.67803e-10	-1.13983e-10	-1.01463e-10
		0.02604	-1.678e-10	-1.14007e-10	-1.01449e-10
		0.02606	-1.67797e-10	-1.1403e-10	-1.01432e-10
		0.02608	-1.67793e-10	-1.14054e-10	-1.01414e-10
		0.0261	-1.6779e-10	-1.14078e-10	-1.01393e-10
		0.02612	-1.67786e-10	-1.14101e-10	-1.01371e-10
		0.02614	-1.67783e-10	-1.14124e-10	-1.01347e-10
		0.02616	-1.67779e-10	-1.14147e-10	-1.01321e-10
		0.02618	-1.67775e-10	-1.1417e-10	-1.01293e-10
		0.0262	-1.6777e-10	-1.14191e-10	-1.01264e-10
		0.02622	-1.67764e-10	-1.14212e-10	-1.01233e-10
		0.02624	-1.67758e-10	-1.14233e-10	-1.01201e-10
		0.02626	-1.67751e-10	-1.14253e-10	-1.01168e-10
		0.02628	-1.67742e-10	-1.14272e-10	-1.01133e-10
		0.0263	-1.67733e-10	-1.1429e-10	-1.01097e-10
		0.02632	-1.67724e-10	-1.14308e-10	-1.0106e-10
		0.02634	-1.67714e-10	-1.14325e-10	-1.01022e-10
		0.02636	-1.67703e-10	-1.14341e-10	-1.00984e-10
		0.02638	-1.67693e-10	-1.14357e-10	-1.00944e-10
		0.0264	-1.67682e-10	-1.14371e-10	-1.00904e-10
		0.02642	-1.67671e-10	-1.14385e-10	-1.00863e-10
		0.02644	-1.67661e-10	-1.14397e-10	-1.00821e-10
		0.02646	-1.6765e-10	-1.14408e-10	-1.00779e-10
		0.02648	-1.6764e-10	-1.14419e-10	-1.00737e-10
		0.0265	-1.67629e-10	-1.14428e-10	-1.00695e-10
		0.02652	-1.67619e-10	-1.14435e-10	-1.00652e-10
		0.02654	-1.67609e-10	-1.14442e-10	-1.0061e-10
		0.02656	-1.67599e-10	-1.14448e-10	-1.00567e-10
		0.02658	-1.67589e-10	-1.14452e-10	-1.00525e-10
		0.0266	-1.67579e-10	-1.14455e-10	-1.00483e-10
		0.02662	-1.67569e-10	-1.14458e-10	-1.00442e-10
		0.02664	-1.6756e-10	-1.14459e-10	-1.00401e-10
		0.02666	-1.67551e-10	-1.14459e-10	-1.0036e-10
		0.02668	-1.67542e-10	-1.14457e-10	-1.0032e-10
		0.0267	-1.67534e-10	-1.14455e-10	-1.0028e-10
		0.02672	-1.67525e-10	-1.14451e-10	-1.0024e-10
		0.02674	-1.67517e-10	-1.14446e-10	-1.00201e-10
		0.02676	-1.67509e-10	-1.14439e-10	-1.00163e-10
		0.02678	-1.675e-10	-1.14431e-10	-1.00124e-10
		0.0268	-1.67491e-10	-1.14421e-10	-1.00086e-10
		0.02682	-1.67482e-10	-1.1441e-10	-1.00049e-10
		0.02684	-1.67472e-10	-1.14397e-10	-1.00012e-10
		0.02686	-1.67461e-10	-1.14383e-10	-9.99751e-11
		0.02688	-1.6745e-10	-1.14367e-10	-9.99392e-11
		0.0269	-1.67438e-10	-1.14349e-10	-9.99041e-11
		0.02692	-1.67425e-10	-1.1433e-10	-9.98699e-11
		0.02694	-1.67412e-10	-1.1431e-10	-9.98369e-11
		0.02696	-1.67398e-10	-1.14288e-10	-9.9805e-11
		0.02698	-1.67384e-10	-1.14265e-10	-9.97744e-11
		0.027	-1.6737e-10	-1.1424e-10	-9.9745e-11
		0.02702	-1.67357e-10	-1.14214e-10	-9.9717e-11
		0.02704	-1.67344e-10	-1.14186e-10	-9.96904e-11
		0.02706	-1.67331e-10	-1.14158e-10	-9.9665e-11
		0.02708	-1.67318e-10	-1.14127e-10	-9.9641e-11
		0.0271	-1.67307e-10	-1.14096e-10	-9.96183e-11
		0.02712	-1.67296e-10	-1.14063e-10	-9.95968e-11
		0.02714	-1.67286e-10	-1.1403e-10	-9.95767e-11
		0.02716	-1.67277e-10	-1.13995e-10	-9.95578e-11
		0.02718	-1.67269e-10	-1.13959e-10	-9.95401e-11
		0.0272	-1.67261e-10	-1.13922e-10	-9.95237e-11
		0.02722	-1.67254e-10	-1.13884e-10	-9.95085e-11
		0.02724	-1.67248e-10	-1.13845e-10	-9.94946e-11
		0.02726	-1.67243e-10	-1.13806e-10	-9.94821e-11
		0.02728	-1.67239e-10	-1.13766e-10	-9.94709e-11
		0.0273	-1.67236e-10	-1.13726e-10	-9.94611e-11
		0.02732	-1.67234e-10	-1.13686e-10	-9.94527e-11
		0.02734	-1.67232e-10	-1.13645e-10	-9.94455e-11
		0.02736	-1.67231e-10	-1.13605e-10	-9.94395e-11
		0.02738	-1.67231e-10	-1.13564e-10	-9.94346e-11
		0.0274	-1.67232e-10	-1.13524e-10	-9.94307e-11
		0.02742	-1.67234e-10	-1.13484e-10	-9.94279e-11
		0.02744	-1.67236e-10	-1.13443e-10	-9.94262e-11
		0.02746	-1.6724e-10	-1.13404e-10	-9.94256e-11
		0.02748	-1.67245e-10	-1.13364e-10	-9.94262e-11
		0.0275	-1.67251e-10	-1.13325e-10	-9.94278e-11
		0.02752	-1.67258e-10	-1.13285e-10	-9.94308e-11
		0.02754	-1.67266e-10	-1.13246e-10	-9.94351e-11
		0.02756	-1.67276e-10	-1.13208e-10	-9.94407e-11
		0.02758	-1.67288e-10	-1.13169e-10	-9.94478e-11
		0.0276	-1.67301e-10	-1.13132e-10	-9.94564e-11
		0.02762	-1.67315e-10	-1.13095e-10	-9.94665e-11
		0.02764	-1.67331e-10	-1.13058e-10	-9.94782e-11
		0.02766	-1.67347e-10	-1.13023e-10	-9.94914e-11
		0.02768	-1.67363e-10	-1.12989e-10	-9.95062e-11
		0.0277	-1.6738e-10	-1.12957e-10	-9.95225e-11
		0.02772	-1.67396e-10	-1.12926e-10	-9.95401e-11
		0.02774	-1.67413e-10	-1.12896e-10	-9.95589e-11
		0.02776	-1.67429e-10	-1.12869e-10	-9.95788e-11
		0.02778	-1.67445e-10	-1.12843e-10	-9.95996e-11
		0.0278	-1.6746e-10	-1.1282e-10	-9.96213e-11
		0.02782	-1.67476e-10	-1.12798e-10	-9.96434e-11
		0.02784	-1.6749e-10	-1.12779e-10	-9.9666e-11
		0.02786	-1.67504e-10	-1.12763e-10	-9.96889e-11
		0.02788	-1.67518e-10	-1.12749e-10	-9.97119e-11
		0.0279	-1.67531e-10	-1.12738e-10	-9.97349e-11
		0.02792	-1.67542e-10	-1.1273e-10	-9.97575e-11
		0.02794	-1.67553e-10	-1.12725e-10	-9.97797e-11
		0.02796	-1.67562e-10	-1.12722e-10	-9.98013e-11
		0.02798	-1.6757e-10	-1.12723e-10	-9.9822e-11
		0.028	-1.67577e-10	-1.12726e-10	-9.98417e-11
		0.02802	-1.67582e-10	-1.12732e-10	-9.98602e-11
		0.02804	-1.67587e-10	-1.12741e-10	-9.98773e-11
		0.02806	-1.67591e-10	-1.12753e-10	-9.98927e-11
		0.02808	-1.67593e-10	-1.12768e-10	-9.99063e-11
		0.0281	-1.67595e-10	-1.12786e-10	-9.9918e-11
		0.02812	-1.67595e-10	-1.12808e-10	-9.99276e-11
		0.02814	-1.67593e-10	-1.12832e-10	-9.99348e-11
		0.02816	-1.6759e-10	-1.12859e-10	-9.99396e-11
		0.02818	-1.67585e-10	-1.12889e-10	-9.99417e-11
		0.0282	-1.67579e-10	-1.12922e-10	-9.99412e-11
		0.02822	-1.67572e-10	-1.12957e-10	-9.9938e-11
		0.02824	-1.67563e-10	-1.12994e-10	-9.99321e-11
		0.02826	-1.67554e-10	-1.13032e-10	-9.99234e-11
		0.02828	-1.67544e-10	-1.13073e-10	-9.9912e-11
		0.0283	-1.67533e-10	-1.13115e-10	-9.98979e-11
		0.02832	-1.67521e-10	-1.13157e-10	-9.98813e-11
		0.02834	-1.67509e-10	-1.13201e-10	-9.98622e-11
		0.02836	-1.67497e-10	-1.13245e-10	-9.98406e-11
		0.02838	-1.67483e-10	-1.1329e-10	-9.98167e-11
		0.0284	-1.67469e-10	-1.13335e-10	-9.97907e-11
		0.02842	-1.67455e-10	-1.13379e-10	-9.97627e-11
		0.02844	-1.67441e-10	-1.13424e-10	-9.97327e-11
		0.02846	-1.67427e-10	-1.13467e-10	-9.97009e-11
		0.02848	-1.67412e-10	-1.13509e-10	-9.96673e-11
		0.0285	-1.67398e-10	-1.1355e-10	-9.96321e-11
		0.02852	-1.67384e-10	-1.1359e-10	-9.95954e-11
		0.02854	-1.67371e-10	-1.13627e-10	-9.95573e-11
		0.02856	-1.67358e-10	-1.13663e-10	-9.95179e-11
		0.02858	-1.67346e-10	-1.13697e-10	-9.94776e-11
		0.0286	-1.67335e-10	-1.13729e-10	-9.94365e-11
		0.02862	-1.67324e-10	-1.13758e-10	-9.93946e-11
		0.02864	-1.67315e-10	-1.13786e-10	-9.93523e-11
		0.02866	-1.67307e-10	-1.13812e-10	-9.93097e-11
		0.02868	-1.673e-10	-1.13835e-10	-9.92668e-11
		0.0287	-1.67294e-10	-1.13857e-10	-9.92241e-11
		0.02872	-1.6729e-10	-1.13876e-10	-9.91815e-11
		0.02874	-1.67287e-10	-1.13894e-10	-9.91393e-11
		0.02876	-1.67286e-10	-1.1391e-10	-9.90977e-11
		0.02878	-1.67286e-10	-1.13923e-10	-9.90568e-11
		0.0288	-1.67288e-10	-1.13935e-10	-9.90167e-11
		0.02882	-1.67291e-10	-1.13946e-10	-9.89777e-11
		0.02884	-1.67296e-10	-1.13955e-10	-9.89398e-11
		0.02886	-1.67302e-10	-1.13962e-10	-9.8903e-11
		0.02888	-1.67311e-10	-1.13969e-10	-9.88673e-11
		0.0289	-1.6732e-10	-1.13974e-10	-9.88327e-11
		0.02892	-1.67332e-10	-1.13978e-10	-9.87992e-11
		0.02894	-1.67345e-10	-1.13981e-10	-9.87666e-11
		0.02896	-1.6736e-10	-1.13984e-10	-9.87351e-11
		0.02898	-1.67376e-10	-1.13986e-10	-9.87046e-11
		0.029	-1.67394e-10	-1.13988e-10	-9.86752e-11
		0.02902	-1.67413e-10	-1.13989e-10	-9.86469e-11
		0.02904	-1.67433e-10	-1.13991e-10	-9.862e-11
		0.02906	-1.67453e-10	-1.13993e-10	-9.85943e-11
		0.02908	-1.67475e-10	-1.13996e-10	-9.85701e-11
		0.0291	-1.67497e-10	-1.14e-10	-9.85475e-11
		0.02912	-1.6752e-10	-1.14005e-10	-9.85265e-11
		0.02914	-1.67544e-10	-1.14011e-10	-9.85072e-11
		0.02916	-1.67569e-10	-1.14019e-10	-9.84897e-11
		0.02918	-1.67593e-10	-1.14028e-10	-9.8474e-11
		0.0292	-1.67619e-10	-1.14039e-10	-9.84602e-11
		0.02922	-1.67644e-10	-1.14052e-10	-9.84481e-11
		0.02924	-1.67669e-10	-1.14066e-10	-9.84378e-11
		0.02926	-1.67695e-10	-1.14082e-10	-9.84291e-11
		0.02928	-1.6772e-10	-1.14101e-10	-9.8422e-11
		0.0293	-1.67744e-10	-1.1412e-10	-9.84164e-11
		0.02932	-1.67769e-10	-1.14142e-10	-9.84124e-11
		0.02934	-1.67792e-10	-1.14165e-10	-9.84097e-11
		0.02936	-1.67815e-10	-1.14191e-10	-9.84085e-11
		0.02938	-1.67838e-10	-1.14217e-10	-9.84086e-11
		0.0294	-1.67859e-10	-1.14245e-10	-9.84099e-11
		0.02942	-1.6788e-10	-1.14275e-10	-9.84122e-11
		0.02944	-1.679e-10	-1.14306e-10	-9.84154e-11
		0.02946	-1.67919e-10	-1.14337e-10	-9.84195e-11
		0.02948	-1.67937e-10	-1.1437e-10	-9.8424e-11
		0.0295	-1.67954e-10	-1.14404e-10	-9.8429e-11
		0.02952	-1.67968e-10	-1.14438e-10	-9.84343e-11
		0.02954	-1.67981e-10	-1.14474e-10	-9.84396e-11
		0.02956	-1.67992e-10	-1.14509e-10	-9.84451e-11
		0.02958	-1.68001e-10	-1.14544e-10	-9.84505e-11
		0.0296	-1.68008e-10	-1.1458e-10	-9.84558e-11
		0.02962	-1.68013e-10	-1.14615e-10	-9.84609e-11
		0.02964	-1.68016e-10	-1.14649e-10	-9.84657e-11
		0.02966	-1.68016e-10	-1.14682e-10	-9.84703e-11
		0.02968	-1.68014e-10	-1.14714e-10	-9.84746e-11
		0.0297	-1.6801e-10	-1.14744e-10	-9.84786e-11
		0.02972	-1.68004e-10	-1.14772e-10	-9.84824e-11
		0.02974	-1.67996e-10	-1.14799e-10	-9.84859e-11
		0.02976	-1.67987e-10	-1.14823e-10	-9.84891e-11
		0.02978	-1.67975e-10	-1.14845e-10	-9.8492e-11
		0.0298	-1.67962e-10	-1.14865e-10	-9.84946e-11
		0.02982	-1.67947e-10	-1.14882e-10	-9.84969e-11
		0.02984	-1.6793e-10	-1.14897e-10	-9.84988e-11
		0.02986	-1.67912e-10	-1.14908e-10	-9.85003e-11
		0.02988	-1.67893e-10	-1.14916e-10	-9.85015e-11
		0.0299	-1.67874e-10	-1.14921e-10	-9.85022e-11
		0.02992	-1.67853e-10	-1.14923e-10	-9.85024e-11
		0.02994	-1.67832e-10	-1.14922e-10	-9.85023e-11
		0.02996	-1.67812e-10	-1.14917e-10	-9.85015e-11
		0.02998	-1.67791e-10	-1.1491e-10	-9.85002e-11
		0.03	-1.67769e-10	-1.14899e-10	-9.84983e-11
		0.03002	-1.67748e-10	-1.14885e-10	-9.84957e-11
		0.03004	-1.67727e-10	-1.14869e-10	-9.84924e-11
		0.03006	-1.67706e-10	-1.1485e-10	-9.84882e-11
		0.03008	-1.67686e-10	-1.14828e-10	-9.84831e-11
		0.0301	-1.67666e-10	-1.14804e-10	-9.8477e-11
		0.03012	-1.67648e-10	-1.14777e-10	-9.84697e-11
		0.03014	-1.67632e-10	-1.14748e-10	-9.84612e-11
		0.03016	-1.67617e-10	-1.14718e-10	-9.84513e-11
		0.03018	-1.67605e-10	-1.14686e-10	-9.844e-11
		0.0302	-1.67594e-10	-1.14652e-10	-9.8427e-11
		0.03022	-1.67585e-10	-1.14617e-10	-9.84124e-11
		0.03024	-1.67578e-10	-1.14581e-10	-9.83959e-11
		0.03026	-1.67572e-10	-1.14544e-10	-9.83775e-11
		0.03028	-1.67568e-10	-1.14506e-10	-9.83573e-11
		0.0303	-1.67566e-10	-1.14468e-10	-9.83352e-11
		0.03032	-1.67565e-10	-1.1443e-10	-9.83113e-11
		0.03034	-1.67565e-10	-1.14392e-10	-9.82855e-11
		0.03036	-1.67566e-10	-1.14354e-10	-9.82579e-11
		0.03038	-1.67568e-10	-1.14317e-10	-9.82286e-11
		0.0304	-1.67572e-10	-1.1428e-10	-9.81975e-11
		0.03042	-1.67577e-10	-1.14244e-10	-9.81648e-11
		0.03044	-1.67583e-10	-1.14209e-10	-9.81306e-11
		0.03046	-1.6759e-10	-1.14176e-10	-9.80949e-11
		0.03048	-1.67598e-10	-1.14143e-10	-9.80578e-11
		0.0305	-1.67608e-10	-1.14113e-10	-9.80195e-11
		0.03052	-1.67618e-10	-1.14083e-10	-9.79799e-11
		0.03054	-1.6763e-10	-1.14056e-10	-9.79391e-11
		0.03056	-1.67643e-10	-1.14029e-10	-9.78972e-11
		0.03058	-1.67657e-10	-1.14004e-10	-9.78544e-11
		0.0306	-1.67672e-10	-1.1398e-10	-9.78108e-11
		0.03062	-1.67688e-10	-1.13958e-10	-9.77667e-11
		0.03064	-1.67704e-10	-1.13936e-10	-9.77224e-11
		0.03066	-1.67721e-10	-1.13916e-10	-9.7678e-11
		0.03068	-1.67738e-10	-1.13897e-10	-9.76339e-11
		0.0307	-1.67755e-10	-1.13878e-10	-9.75903e-11
		0.03072	-1.67772e-10	-1.13861e-10	-9.75475e-11
		0.03074	-1.67789e-10	-1.13844e-10	-9.75055e-11
		0.03076	-1.67805e-10	-1.13828e-10	-9.74648e-11
		0.03078	-1.6782e-10	-1.13813e-10	-9.74254e-11
		0.0308	-1.67835e-10	-1.13799e-10	-9.73878e-11
		0.03082	-1.6785e-10	-1.13785e-10	-9.73522e-11
		0.03084	-1.67864e-10	-1.13772e-10	-9.73188e-11
		0.03086	-1.67876e-10	-1.13759e-10	-9.72878e-11
		0.03088	-1.67888e-10	-1.13747e-10	-9.72596e-11
		0.0309	-1.67899e-10	-1.13736e-10	-9.72343e-11
		0.03092	-1.67909e-10	-1.13724e-10	-9.72122e-11
		0.03094	-1.67918e-10	-1.13714e-10	-9.71934e-11
		0.03096	-1.67927e-10	-1.13704e-10	-9.7178e-11
		0.03098	-1.67934e-10	-1.13694e-10	-9.71661e-11
		0.031	-1.67941e-10	-1.13685e-10	-9.71579e-11
		0.03102	-1.67946e-10	-1.13676e-10	-9.71534e-11
		0.03104	-1.6795e-10	-1.13668e-10	-9.71525e-11
		0.03106	-1.67954e-10	-1.1366e-10	-9.71554e-11
		0.03108	-1.67956e-10	-1.13652e-10	-9.7162e-11
		0.0311	-1.67957e-10	-1.13645e-10	-9.71726e-11
		0.03112	-1.67956e-10	-1.13638e-10	-9.7187e-11
		0.03114	-1.67954e-10	-1.13631e-10	-9.72054e-11
		0.03116	-1.6795e-10	-1.13624e-10	-9.72278e-11
		0.03118	-1.67944e-10	-1.13617e-10	-9.72541e-11
		0.0312	-1.67937e-10	-1.1361e-10	-9.72843e-11
		0.03122	-1.67927e-10	-1.13604e-10	-9.73183e-11
		0.03124	-1.67916e-10	-1.13598e-10	-9.73561e-11
		0.03126	-1.67904e-10	-1.13593e-10	-9.73976e-11
		0.03128	-1.67889e-10	-1.13587e-10	-9.74428e-11
		0.0313	-1.67873e-10	-1.13583e-10	-9.74915e-11
		0.03132	-1.67855e-10	-1.13578e-10	-9.75437e-11
		0.03134	-1.67836e-10	-1.13574e-10	-9.75992e-11
		0.03136	-1.67814e-10	-1.1357e-10	-9.76579e-11
		0.03138	-1.67792e-10	-1.13567e-10	-9.77197e-11
		0.0314	-1.67767e-10	-1.13564e-10	-9.77844e-11
		0.03142	-1.67741e-10	-1.13562e-10	-9.78519e-11
		0.03144	-1.67713e-10	-1.1356e-10	-9.79218e-11
		0.03146	-1.67684e-10	-1.13559e-10	-9.7994e-11
		0.03148	-1.67654e-10	-1.13558e-10	-9.80683e-11
		0.0315	-1.67623e-10	-1.13558e-10	-9.81444e-11
		0.03152	-1.67591e-10	-1.13558e-10	-9.82219e-11
		0.03154	-1.67558e-10	-1.13559e-10	-9.83006e-11
		0.03156	-1.67524e-10	-1.13561e-10	-9.83801e-11
		0.03158	-1.67489e-10	-1.13564e-10	-9.84601e-11
		0.0316	-1.67454e-10	-1.13568e-10	-9.85402e-11
		0.03162	-1.67419e-10	-1.13572e-10	-9.86202e-11
		0.03164	-1.67383e-10	-1.13577e-10	-9.86997e-11
		0.03166	-1.67348e-10	-1.13583e-10	-9.87785e-11
		0.03168	-1.67313e-10	-1.1359e-10	-9.88563e-11
		0.0317	-1.67278e-10	-1.13597e-10	-9.89328e-11
		0.03172	-1.67244e-10	-1.13606e-10	-9.90079e-11
		0.03174	-1.67211e-10	-1.13615e-10	-9.90811e-11
		0.03176	-1.67179e-10	-1.13625e-10	-9.91523e-11
		0.03178	-1.67148e-10	-1.13635e-10	-9.92212e-11
		0.0318	-1.67117e-10	-1.13646e-10	-9.92877e-11
		0.03182	-1.67088e-10	-1.13658e-10	-9.93516e-11
		0.03184	-1.6706e-10	-1.13671e-10	-9.94127e-11
		0.03186	-1.67032e-10	-1.13684e-10	-9.94708e-11
		0.03188	-1.67006e-10	-1.13697e-10	-9.95258e-11
		0.0319	-1.6698e-10	-1.13712e-10	-9.95775e-11
		0.03192	-1.66956e-10	-1.13726e-10	-9.96259e-11
		0.03194	-1.66932e-10	-1.13741e-10	-9.96709e-11
		0.03196	-1.6691e-10	-1.13756e-10	-9.97126e-11
		0.03198	-1.66889e-10	-1.13771e-10	-9.97508e-11
		0.032	-1.6687e-10	-1.13786e-10	-9.97856e-11
		0.03202	-1.66852e-10	-1.13801e-10	-9.98169e-11
		0.03204	-1.66835e-10	-1.13815e-10	-9.98449e-11
		0.03206	-1.6682e-10	-1.13829e-10	-9.98696e-11
		0.03208	-1.66807e-10	-1.13842e-10	-9.98911e-11
		0.0321	-1.66794e-10	-1.13855e-10	-9.99093e-11
		0.03212	-1.66782e-10	-1.13866e-10	-9.99245e-11
		0.03214	-1.66772e-10	-1.13877e-10	-9.99369e-11
		0.03216	-1.66762e-10	-1.13888e-10	-9.99467e-11
		0.03218	-1.66753e-10	-1.13897e-10	-9.9954e-11
		0.0322	-1.66746e-10	-1.13905e-10	-9.9959e-11
		0.03222	-1.66739e-10	-1.13913e-10	-9.99619e-11
		0.03224	-1.66734e-10	-1.13919e-10	-9.99628e-11
		0.03226	-1.6673e-10	-1.13925e-10	-9.9962e-11
		0.03228	-1.66727e-10	-1.13929e-10	-9.99596e-11
		0.0323	-1.66726e-10	-1.13933e-10	-9.99555e-11
		0.03232	-1.66726e-10	-1.13935e-10	-9.99502e-11
		0.03234	-1.66727e-10	-1.13936e-10	-9.99436e-11
		0.03236	-1.66729e-10	-1.13936e-10	-9.9936e-11
		0.03238	-1.66732e-10	-1.13935e-10	-9.99275e-11
		0.0324	-1.66736e-10	-1.13933e-10	-9.99184e-11
		0.03242	-1.6674e-10	-1.13929e-10	-9.99088e-11
		0.03244	-1.66745e-10	-1.13924e-10	-9.98989e-11
		0.03246	-1.6675e-10	-1.13918e-10	-9.98888e-11
		0.03248	-1.66755e-10	-1.13912e-10	-9.98789e-11
		0.0325	-1.66761e-10	-1.13904e-10	-9.98693e-11
		0.03252	-1.66766e-10	-1.13896e-10	-9.98602e-11
		0.03254	-1.66771e-10	-1.13887e-10	-9.98517e-11
		0.03256	-1.66777e-10	-1.13877e-10	-9.98441e-11
		0.03258	-1.66782e-10	-1.13867e-10	-9.98372e-11
		0.0326	-1.66788e-10	-1.13857e-10	-9.98312e-11
		0.03262	-1.66794e-10	-1.13846e-10	-9.9826e-11
		0.03264	-1.66801e-10	-1.13836e-10	-9.98216e-11
		0.03266	-1.66808e-10	-1.13825e-10	-9.9818e-11
		0.03268	-1.66816e-10	-1.13814e-10	-9.98151e-11
		0.0327	-1.66825e-10	-1.13803e-10	-9.98129e-11
		0.03272	-1.66834e-10	-1.13791e-10	-9.98116e-11
		0.03274	-1.66845e-10	-1.1378e-10	-9.98109e-11
		0.03276	-1.66856e-10	-1.13768e-10	-9.98109e-11
		0.03278	-1.66867e-10	-1.13756e-10	-9.98115e-11
		0.0328	-1.66879e-10	-1.13744e-10	-9.98128e-11
		0.03282	-1.66891e-10	-1.13731e-10	-9.98147e-11
		0.03284	-1.66903e-10	-1.13719e-10	-9.98171e-11
		0.03286	-1.66917e-10	-1.13707e-10	-9.98201e-11
		0.03288	-1.6693e-10	-1.13694e-10	-9.98234e-11
		0.0329	-1.66945e-10	-1.13682e-10	-9.98271e-11
		0.03292	-1.6696e-10	-1.13669e-10	-9.98311e-11
		0.03294	-1.66976e-10	-1.13657e-10	-9.98352e-11
		0.03296	-1.66993e-10	-1.13644e-10	-9.98395e-11
		0.03298	-1.67011e-10	-1.13631e-10	-9.98437e-11
		0.033	-1.6703e-10	-1.13618e-10	-9.98481e-11
		0.03302	-1.67051e-10	-1.13605e-10	-9.98524e-11
		0.03304	-1.67072e-10	-1.13592e-10	-9.98566e-11
		0.03306	-1.67094e-10	-1.13579e-10	-9.98607e-11
		0.03308	-1.67118e-10	-1.13566e-10	-9.98646e-11
		0.0331	-1.67143e-10	-1.13553e-10	-9.98682e-11
		0.03312	-1.67169e-10	-1.1354e-10	-9.98713e-11
		0.03314	-1.67197e-10	-1.13528e-10	-9.98738e-11
		0.03316	-1.67226e-10	-1.13516e-10	-9.98757e-11
		0.03318	-1.67257e-10	-1.13504e-10	-9.98769e-11
		0.0332	-1.6729e-10	-1.13492e-10	-9.98774e-11
		0.03322	-1.67325e-10	-1.1348e-10	-9.9877e-11
		0.03324	-1.67361e-10	-1.13469e-10	-9.98759e-11
		0.03326	-1.67399e-10	-1.13458e-10	-9.98738e-11
		0.03328	-1.67439e-10	-1.13447e-10	-9.98707e-11
		0.0333	-1.67481e-10	-1.13436e-10	-9.98664e-11
		0.03332	-1.67524e-10	-1.13426e-10	-9.98611e-11
		0.03334	-1.67569e-10	-1.13417e-10	-9.98546e-11
		0.03336	-1.67616e-10	-1.13407e-10	-9.98468e-11
		0.03338	-1.67664e-10	-1.13398e-10	-9.98378e-11
		0.0334	-1.67713e-10	-1.13389e-10	-9.98276e-11
		0.03342	-1.67764e-10	-1.13381e-10	-9.98161e-11
		0.03344	-1.67816e-10	-1.13373e-10	-9.98034e-11
		0.03346	-1.67869e-10	-1.13365e-10	-9.97896e-11
		0.03348	-1.67923e-10	-1.13357e-10	-9.97747e-11
		0.0335	-1.67977e-10	-1.13349e-10	-9.97589e-11
		0.03352	-1.68032e-10	-1.13342e-10	-9.97422e-11
		0.03354	-1.68088e-10	-1.13335e-10	-9.97248e-11
		0.03356	-1.68143e-10	-1.13329e-10	-9.97068e-11
		0.03358	-1.68199e-10	-1.13323e-10	-9.96882e-11
		0.0336	-1.68255e-10	-1.13317e-10	-9.96691e-11
		0.03362	-1.68311e-10	-1.13312e-10	-9.96496e-11
		0.03364	-1.68367e-10	-1.13308e-10	-9.96298e-11
		0.03366	-1.68423e-10	-1.13304e-10	-9.96097e-11
		0.03368	-1.6848e-10	-1.13301e-10	-9.95895e-11
		0.0337	-1.68537e-10	-1.13299e-10	-9.95693e-11
		0.03372	-1.68594e-10	-1.13298e-10	-9.95492e-11
		0.03374	-1.68651e-10	-1.13298e-10	-9.95294e-11
		0.03376	-1.68708e-10	-1.13298e-10	-9.95101e-11
		0.03378	-1.68766e-10	-1.133e-10	-9.94913e-11
		0.0338	-1.68823e-10	-1.13302e-10	-9.94733e-11
		0.03382	-1.6888e-10	-1.13305e-10	-9.94561e-11
		0.03384	-1.68937e-10	-1.13309e-10	-9.944e-11
		0.03386	-1.68994e-10	-1.13313e-10	-9.94251e-11
		0.03388	-1.6905e-10	-1.13318e-10	-9.94114e-11
		0.0339	-1.69106e-10	-1.13324e-10	-9.93992e-11
		0.03392	-1.6916e-10	-1.13331e-10	-9.93885e-11
		0.03394	-1.69214e-10	-1.13338e-10	-9.93792e-11
		0.03396	-1.69267e-10	-1.13347e-10	-9.93715e-11
		0.03398	-1.69319e-10	-1.13356e-10	-9.93655e-11
		0.034	-1.69369e-10	-1.13366e-10	-9.93612e-11
		0.03402	-1.69418e-10	-1.13376e-10	-9.93586e-11
		0.03404	-1.69465e-10	-1.13388e-10	-9.93578e-11
		0.03406	-1.69511e-10	-1.134e-10	-9.93588e-11
		0.03408	-1.69555e-10	-1.13413e-10	-9.93618e-11
		0.0341	-1.69598e-10	-1.13426e-10	-9.93666e-11
		0.03412	-1.69638e-10	-1.1344e-10	-9.93732e-11
		0.03414	-1.69677e-10	-1.13454e-10	-9.93816e-11
		0.03416	-1.69714e-10	-1.13469e-10	-9.93917e-11
		0.03418	-1.6975e-10	-1.13484e-10	-9.94036e-11
		0.0342	-1.69783e-10	-1.13499e-10	-9.9417e-11
		0.03422	-1.69814e-10	-1.13515e-10	-9.94321e-11
		0.03424	-1.69843e-10	-1.13531e-10	-9.94488e-11
		0.03426	-1.69869e-10	-1.13547e-10	-9.9467e-11
		0.03428	-1.69894e-10	-1.13562e-10	-9.94867e-11
		0.0343	-1.69916e-10	-1.13578e-10	-9.95079e-11
		0.03432	-1.69936e-10	-1.13593e-10	-9.95305e-11
		0.03434	-1.69953e-10	-1.13609e-10	-9.95544e-11
		0.03436	-1.69969e-10	-1.13624e-10	-9.95796e-11
		0.03438	-1.69983e-10	-1.13638e-10	-9.96059e-11
		0.0344	-1.69995e-10	-1.13652e-10	-9.96331e-11
		0.03442	-1.70006e-10	-1.13666e-10	-9.96612e-11
		0.03444	-1.70016e-10	-1.13679e-10	-9.96901e-11
		0.03446	-1.70025e-10	-1.13691e-10	-9.97196e-11
		0.03448	-1.70034e-10	-1.13703e-10	-9.97497e-11
		0.0345	-1.70041e-10	-1.13714e-10	-9.97803e-11
		0.03452	-1.70048e-10	-1.13724e-10	-9.98114e-11
		0.03454	-1.70055e-10	-1.13733e-10	-9.98428e-11
		0.03456	-1.70062e-10	-1.13741e-10	-9.98744e-11
		0.03458	-1.70068e-10	-1.13748e-10	-9.99061e-11
		0.0346	-1.70074e-10	-1.13755e-10	-9.99375e-11
		0.03462	-1.7008e-10	-1.1376e-10	-9.99686e-11
		0.03464	-1.70085e-10	-1.13765e-10	-9.99991e-11
		0.03466	-1.7009e-10	-1.13769e-10	-1.00029e-10
		0.03468	-1.70096e-10	-1.13772e-10	-1.00058e-10
		0.0347	-1.70101e-10	-1.13775e-10	-1.00086e-10
		0.03472	-1.70106e-10	-1.13777e-10	-1.00113e-10
		0.03474	-1.70112e-10	-1.1378e-10	-1.00139e-10
		0.03476	-1.70118e-10	-1.13782e-10	-1.00163e-10
		0.03478	-1.70125e-10	-1.13785e-10	-1.00187e-10
		0.0348	-1.70132e-10	-1.13787e-10	-1.00208e-10
		0.03482	-1.7014e-10	-1.13789e-10	-1.00228e-10
		0.03484	-1.70149e-10	-1.13792e-10	-1.00246e-10
		0.03486	-1.70159e-10	-1.13794e-10	-1.00263e-10
		0.03488	-1.7017e-10	-1.13797e-10	-1.00278e-10
		0.0349	-1.70181e-10	-1.13801e-10	-1.00291e-10
		0.03492	-1.70194e-10	-1.13804e-10	-1.00302e-10
		0.03494	-1.70207e-10	-1.13808e-10	-1.00311e-10
		0.03496	-1.70221e-10	-1.13812e-10	-1.00319e-10
		0.03498	-1.70235e-10	-1.13817e-10	-1.00324e-10
		0.035	-1.70251e-10	-1.13822e-10	-1.00328e-10
		0.03502	-1.70267e-10	-1.13827e-10	-1.0033e-10
		0.03504	-1.70285e-10	-1.13833e-10	-1.0033e-10
		0.03506	-1.70304e-10	-1.13839e-10	-1.00328e-10
		0.03508	-1.70324e-10	-1.13846e-10	-1.00324e-10
		0.0351	-1.70345e-10	-1.13853e-10	-1.00319e-10
		0.03512	-1.70368e-10	-1.1386e-10	-1.00312e-10
		0.03514	-1.70391e-10	-1.13868e-10	-1.00304e-10
		0.03516	-1.70416e-10	-1.13876e-10	-1.00294e-10
		0.03518	-1.70441e-10	-1.13885e-10	-1.00283e-10
		0.0352	-1.70468e-10	-1.13895e-10	-1.00271e-10
		0.03522	-1.70495e-10	-1.13905e-10	-1.00258e-10
		0.03524	-1.70524e-10	-1.13916e-10	-1.00245e-10
		0.03526	-1.70553e-10	-1.13928e-10	-1.0023e-10
		0.03528	-1.70583e-10	-1.1394e-10	-1.00215e-10
		0.0353	-1.70615e-10	-1.13953e-10	-1.002e-10
		0.03532	-1.70647e-10	-1.13967e-10	-1.00185e-10
		0.03534	-1.7068e-10	-1.13981e-10	-1.0017e-10
		0.03536	-1.70715e-10	-1.13995e-10	-1.00154e-10
		0.03538	-1.7075e-10	-1.14011e-10	-1.00139e-10
		0.0354	-1.70787e-10	-1.14026e-10	-1.00124e-10
		0.03542	-1.70825e-10	-1.14042e-10	-1.00109e-10
		0.03544	-1.70865e-10	-1.14058e-10	-1.00094e-10
		0.03546	-1.70906e-10	-1.14075e-10	-1.00081e-10
		0.03548	-1.70948e-10	-1.14092e-10	-1.00067e-10
		0.0355	-1.70992e-10	-1.14108e-10	-1.00055e-10
		0.03552	-1.71037e-10	-1.14125e-10	-1.00044e-10
		0.03554	-1.71083e-10	-1.14141e-10	-1.00033e-10
		0.03556	-1.7113e-10	-1.14157e-10	-1.00024e-10
		0.03558	-1.71177e-10	-1.14172e-10	-1.00016e-10
		0.0356	-1.71226e-10	-1.14187e-10	-1.00009e-10
		0.03562	-1.71274e-10	-1.14202e-10	-1.00004e-10
		0.03564	-1.71322e-10	-1.14215e-10	-9.99999e-11
		0.03566	-1.7137e-10	-1.14229e-10	-9.99976e-11
		0.03568	-1.71417e-10	-1.14241e-10	-9.9997e-11
		0.0357	-1.71464e-10	-1.14253e-10	-9.99981e-11
		0.03572	-1.71511e-10	-1.14264e-10	-1.00001e-10
		0.03574	-1.71557e-10	-1.14276e-10	-1.00006e-10
		0.03576	-1.71602e-10	-1.14286e-10	-1.00012e-10
		0.03578	-1.71647e-10	-1.14297e-10	-1.00021e-10
		0.0358	-1.71691e-10	-1.14307e-10	-1.00031e-10
		0.03582	-1.71735e-10	-1.14317e-10	-1.00044e-10
		0.03584	-1.71778e-10	-1.14327e-10	-1.00058e-10
		0.03586	-1.71822e-10	-1.14338e-10	-1.00075e-10
		0.03588	-1.71865e-10	-1.14348e-10	-1.00094e-10
		0.0359	-1.71908e-10	-1.14358e-10	-1.00115e-10
		0.03592	-1.71951e-10	-1.14369e-10	-1.00138e-10
		0.03594	-1.71993e-10	-1.14379e-10	-1.00164e-10
		0.03596	-1.72036e-10	-1.1439e-10	-1.00191e-10
		0.03598	-1.72078e-10	-1.144e-10	-1.00221e-10
		0.036	-1.72119e-10	-1.14411e-10	-1.00254e-10
		0.03602	-1.72161e-10	-1.14421e-10	-1.00288e-10
		0.03604	-1.72202e-10	-1.14432e-10	-1.00324e-10
		0.03606	-1.72242e-10	-1.14442e-10	-1.00363e-10
		0.03608	-1.72282e-10	-1.14452e-10	-1.00403e-10
		0.0361	-1.72322e-10	-1.14463e-10	-1.00445e-10
		0.03612	-1.72361e-10	-1.14473e-10	-1.00489e-10
		0.03614	-1.72399e-10	-1.14483e-10	-1.00534e-10
		0.03616	-1.72437e-10	-1.14493e-10	-1.0058e-10
		0.03618	-1.72475e-10	-1.14502e-10	-1.00628e-10
		0.0362	-1.72511e-10	-1.14512e-10	-1.00677e-10
		0.03622	-1.72547e-10	-1.14521e-10	-1.00727e-10
		0.03624	-1.72582e-10	-1.1453e-10	-1.00779e-10
		0.03626	-1.72616e-10	-1.14538e-10	-1.00831e-10
		0.03628	-1.7265e-10	-1.14547e-10	-1.00884e-10
		0.0363	-1.72682e-10	-1.14555e-10	-1.00937e-10
		0.03632	-1.72714e-10	-1.14563e-10	-1.00991e-10
		0.03634	-1.72745e-10	-1.14571e-10	-1.01045e-10
		0.03636	-1.72774e-10	-1.14578e-10	-1.011e-10
		0.03638	-1.72803e-10	-1.14585e-10	-1.01155e-10
		0.0364	-1.7283e-10	-1.14592e-10	-1.01211e-10
		0.03642	-1.72855e-10	-1.14599e-10	-1.01266e-10
		0.03644	-1.72879e-10	-1.14606e-10	-1.01321e-10
		0.03646	-1.72901e-10	-1.14612e-10	-1.01376e-10
		0.03648	-1.72922e-10	-1.14618e-10	-1.0143e-10
		0.0365	-1.7294e-10	-1.14624e-10	-1.01484e-10
		0.03652	-1.72956e-10	-1.14631e-10	-1.01536e-10
		0.03654	-1.7297e-10	-1.14637e-10	-1.01588e-10
		0.03656	-1.72981e-10	-1.14643e-10	-1.01639e-10
		0.03658	-1.72991e-10	-1.14649e-10	-1.01688e-10
		0.0366	-1.72998e-10	-1.14656e-10	-1.01737e-10
		0.03662	-1.73003e-10	-1.14663e-10	-1.01784e-10
		0.03664	-1.73007e-10	-1.14669e-10	-1.0183e-10
		0.03666	-1.73008e-10	-1.14676e-10	-1.01874e-10
		0.03668	-1.73007e-10	-1.14683e-10	-1.01917e-10
		0.0367	-1.73005e-10	-1.1469e-10	-1.01958e-10
		0.03672	-1.73e-10	-1.14697e-10	-1.01998e-10
		0.03674	-1.72994e-10	-1.14704e-10	-1.02035e-10
		0.03676	-1.72986e-10	-1.14711e-10	-1.02071e-10
		0.03678	-1.72976e-10	-1.14718e-10	-1.02105e-10
		0.0368	-1.72965e-10	-1.14725e-10	-1.02136e-10
		0.03682	-1.72952e-10	-1.14732e-10	-1.02166e-10
		0.03684	-1.72937e-10	-1.14738e-10	-1.02194e-10
		0.03686	-1.72921e-10	-1.14745e-10	-1.02221e-10
		0.03688	-1.72903e-10	-1.14751e-10	-1.02245e-10
		0.0369	-1.72883e-10	-1.14758e-10	-1.02268e-10
		0.03692	-1.72862e-10	-1.14764e-10	-1.02289e-10
		0.03694	-1.72839e-10	-1.1477e-10	-1.02308e-10
		0.03696	-1.72815e-10	-1.14775e-10	-1.02326e-10
		0.03698	-1.7279e-10	-1.1478e-10	-1.02342e-10
		0.037	-1.72763e-10	-1.14785e-10	-1.02356e-10
		0.03702	-1.72735e-10	-1.1479e-10	-1.02369e-10
		0.03704	-1.72705e-10	-1.14794e-10	-1.0238e-10
		0.03706	-1.72675e-10	-1.14798e-10	-1.02389e-10
		0.03708	-1.72645e-10	-1.14802e-10	-1.02397e-10
		0.0371	-1.72614e-10	-1.14806e-10	-1.02403e-10
		0.03712	-1.72583e-10	-1.1481e-10	-1.02407e-10
		0.03714	-1.72552e-10	-1.14813e-10	-1.02409e-10
		0.03716	-1.72521e-10	-1.14816e-10	-1.0241e-10
		0.03718	-1.72491e-10	-1.14819e-10	-1.0241e-10
		0.0372	-1.72462e-10	-1.14821e-10	-1.02408e-10
		0.03722	-1.72433e-10	-1.14824e-10	-1.02405e-10
		0.03724	-1.72405e-10	-1.14826e-10	-1.024e-10
		0.03726	-1.72379e-10	-1.14827e-10	-1.02394e-10
		0.03728	-1.72353e-10	-1.14828e-10	-1.02387e-10
		0.0373	-1.72329e-10	-1.14829e-10	-1.02378e-10
		0.03732	-1.72306e-10	-1.1483e-10	-1.02367e-10
		0.03734	-1.72284e-10	-1.1483e-10	-1.02355e-10
		0.03736	-1.72263e-10	-1.1483e-10	-1.02342e-10
		0.03738	-1.72243e-10	-1.14829e-10	-1.02327e-10
		0.0374	-1.72225e-10	-1.14829e-10	-1.02311e-10
		0.03742	-1.72208e-10	-1.14828e-10	-1.02293e-10
		0.03744	-1.72192e-10	-1.14828e-10	-1.02274e-10
		0.03746	-1.72176e-10	-1.14827e-10	-1.02254e-10
		0.03748	-1.72163e-10	-1.14827e-10	-1.02232e-10
		0.0375	-1.7215e-10	-1.14828e-10	-1.02208e-10
		0.03752	-1.72138e-10	-1.14829e-10	-1.02183e-10
		0.03754	-1.72127e-10	-1.14831e-10	-1.02157e-10
		0.03756	-1.72117e-10	-1.14833e-10	-1.02129e-10
		0.03758	-1.72108e-10	-1.14836e-10	-1.021e-10
		0.0376	-1.721e-10	-1.1484e-10	-1.02069e-10
		0.03762	-1.72093e-10	-1.14845e-10	-1.02037e-10
		0.03764	-1.72087e-10	-1.1485e-10	-1.02004e-10
		0.03766	-1.72081e-10	-1.14855e-10	-1.0197e-10
		0.03768	-1.72075e-10	-1.14861e-10	-1.01934e-10
		0.0377	-1.72069e-10	-1.14868e-10	-1.01898e-10
		0.03772	-1.72063e-10	-1.14874e-10	-1.01861e-10
		0.03774	-1.72057e-10	-1.14881e-10	-1.01823e-10
		0.03776	-1.7205e-10	-1.14888e-10	-1.01784e-10
		0.03778	-1.72043e-10	-1.14895e-10	-1.01745e-10
		0.0378	-1.72035e-10	-1.14902e-10	-1.01706e-10
		0.03782	-1.72027e-10	-1.14909e-10	-1.01665e-10
		0.03784	-1.72018e-10	-1.14916e-10	-1.01625e-10
		0.03786	-1.72008e-10	-1.14923e-10	-1.01584e-10
		0.03788	-1.71997e-10	-1.1493e-10	-1.01543e-10
		0.0379	-1.71986e-10	-1.14937e-10	-1.01502e-10
		0.03792	-1.71973e-10	-1.14944e-10	-1.01461e-10
		0.03794	-1.7196e-10	-1.14951e-10	-1.0142e-10
		0.03796	-1.71945e-10	-1.14958e-10	-1.0138e-10
		0.03798	-1.7193e-10	-1.14964e-10	-1.0134e-10
		0.038	-1.71913e-10	-1.14971e-10	-1.01301e-10
		0.03802	-1.71896e-10	-1.14977e-10	-1.01262e-10
		0.03804	-1.71879e-10	-1.14984e-10	-1.01224e-10
		0.03806	-1.7186e-10	-1.1499e-10	-1.01188e-10
		0.03808	-1.71841e-10	-1.14996e-10	-1.01152e-10
		0.0381	-1.71821e-10	-1.15002e-10	-1.01118e-10
		0.03812	-1.718e-10	-1.15007e-10	-1.01086e-10
		0.03814	-1.71778e-10	-1.15013e-10	-1.01055e-10
		0.03816	-1.71755e-10	-1.15018e-10	-1.01026e-10
		0.03818	-1.71731e-10	-1.15023e-10	-1.00999e-10
		0.0382	-1.71706e-10	-1.15028e-10	-1.00973e-10
		0.03822	-1.7168e-10	-1.15032e-10	-1.00949e-10
		0.03824	-1.71653e-10	-1.15037e-10	-1.00926e-10
		0.03826	-1.71625e-10	-1.15041e-10	-1.00906e-10
		0.03828	-1.71596e-10	-1.15044e-10	-1.00887e-10
		0.0383	-1.71565e-10	-1.15048e-10	-1.00869e-10
		0.03832	-1.71533e-10	-1.15051e-10	-1.00854e-10
		0.03834	-1.715e-10	-1.15054e-10	-1.00839e-10
		0.03836	-1.71465e-10	-1.15056e-10	-1.00827e-10
		0.03838	-1.7143e-10	-1.15057e-10	-1.00816e-10
		0.0384	-1.71393e-10	-1.15058e-10	-1.00806e-10
		0.03842	-1.71355e-10	-1.15058e-10	-1.00798e-10
		0.03844	-1.71316e-10	-1.15058e-10	-1.0079e-10
		0.03846	-1.71277e-10	-1.15057e-10	-1.00785e-10
		0.03848	-1.71237e-10	-1.15056e-10	-1.0078e-10
		0.0385	-1.71196e-10	-1.15054e-10	-1.00777e-10
		0.03852	-1.71156e-10	-1.15051e-10	-1.00775e-10
		0.03854	-1.71115e-10	-1.15048e-10	-1.00774e-10
		0.03856	-1.71074e-10	-1.15045e-10	-1.00774e-10
		0.03858	-1.71034e-10	-1.15041e-10	-1.00776e-10
		0.0386	-1.70993e-10	-1.15036e-10	-1.00778e-10
		0.03862	-1.70954e-10	-1.15032e-10	-1.00781e-10
		0.03864	-1.70914e-10	-1.15026e-10	-1.00786e-10
		0.03866	-1.70876e-10	-1.15021e-10	-1.00791e-10
		0.03868	-1.70839e-10	-1.15015e-10	-1.00797e-10
		0.0387	-1.70802e-10	-1.1501e-10	-1.00803e-10
		0.03872	-1.70767e-10	-1.15004e-10	-1.00811e-10
		0.03874	-1.70733e-10	-1.14998e-10	-1.00818e-10
		0.03876	-1.70701e-10	-1.14992e-10	-1.00826e-10
		0.03878	-1.7067e-10	-1.14987e-10	-1.00834e-10
		0.0388	-1.7064e-10	-1.14981e-10	-1.00841e-10
		0.03882	-1.70613e-10	-1.14976e-10	-1.00848e-10
		0.03884	-1.70587e-10	-1.14971e-10	-1.00855e-10
		0.03886	-1.70563e-10	-1.14966e-10	-1.00861e-10
		0.03888	-1.70541e-10	-1.14962e-10	-1.00867e-10
		0.0389	-1.70521e-10	-1.14958e-10	-1.00872e-10
		0.03892	-1.70503e-10	-1.14955e-10	-1.00876e-10
		0.03894	-1.70486e-10	-1.14952e-10	-1.00879e-10
		0.03896	-1.70472e-10	-1.14949e-10	-1.00881e-10
		0.03898	-1.70459e-10	-1.14947e-10	-1.00882e-10
		0.039	-1.70449e-10	-1.14946e-10	-1.00882e-10
		0.03902	-1.7044e-10	-1.14945e-10	-1.00881e-10
		0.03904	-1.70433e-10	-1.14944e-10	-1.00879e-10
		0.03906	-1.70427e-10	-1.14943e-10	-1.00876e-10
		0.03908	-1.70424e-10	-1.14942e-10	-1.00872e-10
		0.0391	-1.70422e-10	-1.14941e-10	-1.00867e-10
		0.03912	-1.70421e-10	-1.1494e-10	-1.00861e-10
		0.03914	-1.70423e-10	-1.14938e-10	-1.00854e-10
		0.03916	-1.70425e-10	-1.14936e-10	-1.00847e-10
		0.03918	-1.7043e-10	-1.14934e-10	-1.00838e-10
		0.0392	-1.70435e-10	-1.14931e-10	-1.00828e-10
		0.03922	-1.70441e-10	-1.14929e-10	-1.00818e-10
		0.03924	-1.70448e-10	-1.14925e-10	-1.00807e-10
		0.03926	-1.70456e-10	-1.14922e-10	-1.00795e-10
		0.03928	-1.70465e-10	-1.14918e-10	-1.00783e-10
		0.0393	-1.70475e-10	-1.14914e-10	-1.0077e-10
		0.03932	-1.70485e-10	-1.14911e-10	-1.00757e-10
		0.03934	-1.70495e-10	-1.14907e-10	-1.00744e-10
		0.03936	-1.70507e-10	-1.14905e-10	-1.0073e-10
		0.03938	-1.70518e-10	-1.14902e-10	-1.00716e-10
		0.0394	-1.70531e-10	-1.14901e-10	-1.00702e-10
		0.03942	-1.70543e-10	-1.149e-10	-1.00688e-10
		0.03944	-1.70556e-10	-1.14899e-10	-1.00674e-10
		0.03946	-1.70569e-10	-1.14899e-10	-1.00661e-10
		0.03948	-1.70582e-10	-1.149e-10	-1.00647e-10
		0.0395	-1.70595e-10	-1.14902e-10	-1.00634e-10
		0.03952	-1.70608e-10	-1.14905e-10	-1.00621e-10
		0.03954	-1.7062e-10	-1.14908e-10	-1.00609e-10
		0.03956	-1.70632e-10	-1.14912e-10	-1.00597e-10
		0.03958	-1.70643e-10	-1.14918e-10	-1.00585e-10
		0.0396	-1.70653e-10	-1.14924e-10	-1.00574e-10
		0.03962	-1.70663e-10	-1.14932e-10	-1.00564e-10
		0.03964	-1.70672e-10	-1.14941e-10	-1.00554e-10
		0.03966	-1.7068e-10	-1.14952e-10	-1.00544e-10
		0.03968	-1.70687e-10	-1.14964e-10	-1.00535e-10
		0.0397	-1.70694e-10	-1.14977e-10	-1.00526e-10
		0.03972	-1.70699e-10	-1.14992e-10	-1.00518e-10
		0.03974	-1.70703e-10	-1.15009e-10	-1.0051e-10
		0.03976	-1.70706e-10	-1.15026e-10	-1.00503e-10
		0.03978	-1.70707e-10	-1.15045e-10	-1.00496e-10
		0.0398	-1.70707e-10	-1.15065e-10	-1.0049e-10
		0.03982	-1.70706e-10	-1.15085e-10	-1.00484e-10
		0.03984	-1.70703e-10	-1.15107e-10	-1.00478e-10
		0.03986	-1.70698e-10	-1.15128e-10	-1.00473e-10
		0.03988	-1.70692e-10	-1.1515e-10	-1.00468e-10
		0.0399	-1.70685e-10	-1.15173e-10	-1.00463e-10
		0.03992	-1.70675e-10	-1.15195e-10	-1.00459e-10
[truncated: 248,305+ more rows]

## Sheet: 25 Hz data, Panel B
		Panel B_sample EPSC traces					Panel B_normalized EPSC amplitude vs stimulation (#)								Panel B_average facilitation at EPSCs (#26-30)
		Time (s)	Control	Bafilomycin	Folimycin		Stimulation (#)	Control		Bafilomycin		Folimycin				Control	Bafilomycin	Folimycin
								Mean	SEM	Mean	SEM	Mean	SEM		Mean	2.65	2.49	2.68478
		0	-4.08506e-10	-1.14766e-10	-1.73759e-10		1	1	0	1	0	1	0		SEM	0.29	0.25	0.17502
		2e-05	-4.08505e-10	-1.14766e-10	-1.7376e-10		2	1.78958	0.128202	1.80098	0.168468	1.84318	0.109269		n number	16	6	7
		4e-05	-4.08503e-10	-1.14767e-10	-1.73764e-10		3	2.64514	0.147331	2.44129	0.310039	2.92216	0.210012		p-value	-	0.8	0.9
		6e-05	-4.085e-10	-1.14768e-10	-1.7377e-10		4	2.96847	0.210038	3.11877	0.499782	3.013	0.3878
		8e-05	-4.08496e-10	-1.1477e-10	-1.73778e-10		5	3.35062	0.278485	2.77492	0.300182	3.20049	0.294067
		0.0001	-4.0849e-10	-1.14772e-10	-1.73789e-10		6	3.36576	0.3185	3.00814	0.437468	3.27841	0.123839
		0.00012	-4.08483e-10	-1.14774e-10	-1.73802e-10		7	3.37975	0.305929	2.96999	0.334259	2.93268	0.250866
		0.00014	-4.08473e-10	-1.14778e-10	-1.73817e-10		8	3.38541	0.281238	2.86315	0.499364	3.0749	0.206144
		0.00016	-4.08462e-10	-1.14782e-10	-1.73834e-10		9	3.35761	0.32367	2.99374	0.477412	3.0334	0.155373
		0.00018	-4.08449e-10	-1.14786e-10	-1.73854e-10		10	3.30307	0.322848	2.98989	0.442614	2.8223	0.307619
		0.0002	-4.08435e-10	-1.14792e-10	-1.73874e-10		11	3.29701	0.342767	3.11647	0.31322	3.07884	0.337942
		0.00022	-4.08419e-10	-1.14799e-10	-1.73897e-10		12	3.48151	0.363369	2.96621	0.471289	2.83534	0.269506
		0.00024	-4.08402e-10	-1.14806e-10	-1.73921e-10		13	3.09424	0.305844	3.17449	0.42285	3.08091	0.286959
		0.00026	-4.08385e-10	-1.14814e-10	-1.73946e-10		14	3.14617	0.340418	2.74968	0.307436	3.31082	0.259205
		0.00028	-4.08366e-10	-1.14822e-10	-1.73973e-10		15	3.04987	0.383749	2.68496	0.288362	3.44059	0.240303
		0.0003	-4.08346e-10	-1.14832e-10	-1.74001e-10		16	3.37541	0.374337	3.1512	0.432851	2.9129	0.176837
		0.00032	-4.08326e-10	-1.14842e-10	-1.7403e-10		17	2.88459	0.319	2.48941	0.209229	2.75339	0.0651106
		0.00034	-4.08305e-10	-1.14852e-10	-1.74059e-10		18	2.99467	0.340174	3.21921	0.526481	3.09058	0.16189
		0.00036	-4.08283e-10	-1.14864e-10	-1.74089e-10		19	3.13965	0.295483	2.65664	0.424172	3.03874	0.423209
		0.00038	-4.08261e-10	-1.14875e-10	-1.7412e-10		20	2.84758	0.362486	2.9893	0.425687	2.78767	0.32925
		0.0004	-4.08239e-10	-1.14887e-10	-1.74151e-10		21	2.9566	0.369241	2.49495	0.48758	3.10832	0.363687
		0.00042	-4.08216e-10	-1.149e-10	-1.74183e-10		22	3.02989	0.325601	2.36142	0.249554	2.60571	0.146258
		0.00044	-4.08192e-10	-1.14912e-10	-1.74215e-10		23	3.05882	0.355164	2.99547	0.418868	3.05869	0.255179
		0.00046	-4.08169e-10	-1.14926e-10	-1.74247e-10		24	2.87257	0.284924	2.51177	0.329177	3.00332	0.387928
		0.00048	-4.08144e-10	-1.14939e-10	-1.74279e-10		25	2.67314	0.328179	2.8956	0.640838	2.82765	0.261859
		0.0005	-4.0812e-10	-1.14952e-10	-1.74312e-10		26	2.74007	0.293161	2.40807	0.337707	2.73585	0.241757
		0.00052	-4.08096e-10	-1.14966e-10	-1.74344e-10		27	2.55826	0.274005	2.32687	0.245575	2.62216	0.234554
		0.00054	-4.08071e-10	-1.1498e-10	-1.74377e-10		28	2.67071	0.30566	2.75661	0.400261	2.44416	0.216187
		0.00056	-4.08048e-10	-1.14994e-10	-1.74409e-10		29	2.62912	0.312356	2.51692	0.3064	2.93043	0.245832
		0.00058	-4.08025e-10	-1.15007e-10	-1.74442e-10		30	2.63707	0.333108	2.42431	0.30687	2.69131	0.217814
		0.0006	-4.08003e-10	-1.15021e-10	-1.74474e-10
		0.00062	-4.07982e-10	-1.15034e-10	-1.74506e-10
		0.00064	-4.07963e-10	-1.15047e-10	-1.74538e-10
		0.00066	-4.07945e-10	-1.15059e-10	-1.74568e-10
		0.00068	-4.07929e-10	-1.15071e-10	-1.74598e-10
		0.0007	-4.07915e-10	-1.15082e-10	-1.74627e-10
		0.00072	-4.07903e-10	-1.15094e-10	-1.74655e-10
		0.00074	-4.07892e-10	-1.15105e-10	-1.74681e-10
		0.00076	-4.07883e-10	-1.15116e-10	-1.74706e-10
		0.00078	-4.07877e-10	-1.15126e-10	-1.7473e-10
		0.0008	-4.07872e-10	-1.15137e-10	-1.74751e-10
		0.00082	-4.07869e-10	-1.15148e-10	-1.74771e-10
		0.00084	-4.07868e-10	-1.1516e-10	-1.7479e-10
		0.00086	-4.07868e-10	-1.15172e-10	-1.74806e-10
		0.00088	-4.07869e-10	-1.15184e-10	-1.74822e-10
		0.0009	-4.0787e-10	-1.15197e-10	-1.74835e-10
		0.00092	-4.07871e-10	-1.15211e-10	-1.74848e-10
		0.00094	-4.07873e-10	-1.15226e-10	-1.74859e-10
		0.00096	-4.07875e-10	-1.15242e-10	-1.74868e-10
		0.00098	-4.07877e-10	-1.1526e-10	-1.74876e-10
		0.001	-4.07878e-10	-1.15278e-10	-1.74883e-10
		0.00102	-4.07879e-10	-1.15298e-10	-1.74888e-10
		0.00104	-4.0788e-10	-1.15319e-10	-1.74891e-10
		0.00106	-4.07879e-10	-1.15342e-10	-1.74893e-10
		0.00108	-4.07878e-10	-1.15367e-10	-1.74894e-10
		0.0011	-4.07876e-10	-1.15393e-10	-1.74894e-10
		0.00112	-4.07874e-10	-1.15421e-10	-1.74892e-10
		0.00114	-4.07871e-10	-1.1545e-10	-1.74889e-10
		0.00116	-4.07867e-10	-1.15481e-10	-1.74885e-10
		0.00118	-4.07862e-10	-1.15514e-10	-1.7488e-10
		0.0012	-4.07857e-10	-1.15549e-10	-1.74873e-10
		0.00122	-4.07852e-10	-1.15586e-10	-1.74866e-10
		0.00124	-4.07845e-10	-1.15625e-10	-1.74856e-10
		0.00126	-4.07838e-10	-1.15665e-10	-1.74846e-10
		0.00128	-4.07831e-10	-1.15708e-10	-1.74834e-10
		0.0013	-4.07823e-10	-1.15752e-10	-1.7482e-10
		0.00132	-4.07814e-10	-1.15798e-10	-1.74805e-10
		0.00134	-4.07804e-10	-1.15846e-10	-1.74787e-10
		0.00136	-4.07794e-10	-1.15896e-10	-1.74768e-10
		0.00138	-4.07784e-10	-1.15946e-10	-1.74747e-10
		0.0014	-4.07772e-10	-1.15998e-10	-1.74724e-10
		0.00142	-4.0776e-10	-1.16051e-10	-1.74698e-10
		0.00144	-4.07748e-10	-1.16104e-10	-1.74671e-10
		0.00146	-4.07735e-10	-1.16159e-10	-1.74641e-10
		0.00148	-4.07722e-10	-1.16213e-10	-1.74609e-10
		0.0015	-4.0771e-10	-1.16268e-10	-1.74576e-10
		0.00152	-4.07697e-10	-1.16323e-10	-1.74541e-10
		0.00154	-4.07684e-10	-1.16378e-10	-1.74504e-10
		0.00156	-4.07672e-10	-1.16433e-10	-1.74465e-10
		0.00158	-4.07659e-10	-1.16488e-10	-1.74425e-10
		0.0016	-4.07646e-10	-1.16543e-10	-1.74383e-10
		0.00162	-4.07633e-10	-1.16597e-10	-1.7434e-10
		0.00164	-4.07619e-10	-1.16651e-10	-1.74295e-10
		0.00166	-4.07605e-10	-1.16704e-10	-1.7425e-10
		0.00168	-4.07591e-10	-1.16757e-10	-1.74203e-10
		0.0017	-4.07577e-10	-1.16809e-10	-1.74156e-10
		0.00172	-4.07562e-10	-1.16859e-10	-1.74108e-10
		0.00174	-4.07547e-10	-1.16909e-10	-1.74059e-10
		0.00176	-4.07533e-10	-1.16958e-10	-1.74009e-10
		0.00178	-4.07518e-10	-1.17005e-10	-1.73959e-10
		0.0018	-4.07504e-10	-1.1705e-10	-1.73908e-10
		0.00182	-4.07489e-10	-1.17094e-10	-1.73858e-10
		0.00184	-4.07475e-10	-1.17135e-10	-1.73808e-10
		0.00186	-4.07461e-10	-1.17175e-10	-1.73759e-10
		0.00188	-4.07448e-10	-1.17213e-10	-1.73711e-10
		0.0019	-4.07433e-10	-1.17249e-10	-1.73664e-10
		0.00192	-4.07419e-10	-1.17283e-10	-1.73618e-10
		0.00194	-4.07404e-10	-1.17315e-10	-1.73575e-10
		0.00196	-4.07388e-10	-1.17344e-10	-1.73533e-10
		0.00198	-4.07371e-10	-1.17371e-10	-1.73493e-10
		0.002	-4.07352e-10	-1.17395e-10	-1.73456e-10
		0.00202	-4.07332e-10	-1.17417e-10	-1.73421e-10
		0.00204	-4.0731e-10	-1.17436e-10	-1.73389e-10
		0.00206	-4.07287e-10	-1.17452e-10	-1.7336e-10
		0.00208	-4.07261e-10	-1.17464e-10	-1.73333e-10
		0.0021	-4.07235e-10	-1.17474e-10	-1.7331e-10
		0.00212	-4.07207e-10	-1.1748e-10	-1.7329e-10
		0.00214	-4.0718e-10	-1.17484e-10	-1.73274e-10
		0.00216	-4.07154e-10	-1.17483e-10	-1.73261e-10
		0.00218	-4.07132e-10	-1.17479e-10	-1.73253e-10
		0.0022	-4.07115e-10	-1.17471e-10	-1.73249e-10
		0.00222	-4.07106e-10	-1.17458e-10	-1.73249e-10
		0.00224	-4.07108e-10	-1.1744e-10	-1.73251e-10
		0.00226	-4.07124e-10	-1.17416e-10	-1.73256e-10
		0.00228	-4.07159e-10	-1.17385e-10	-1.73263e-10
		0.0023	-4.07215e-10	-1.17347e-10	-1.7327e-10
		0.00232	-4.073e-10	-1.17301e-10	-1.73279e-10
		0.00234	-4.07417e-10	-1.17246e-10	-1.73289e-10
		0.00236	-4.07574e-10	-1.17184e-10	-1.733e-10
		0.00238	-4.07776e-10	-1.17114e-10	-1.73314e-10
		0.0024	-4.08032e-10	-1.17036e-10	-1.73331e-10
		0.00242	-4.08347e-10	-1.1695e-10	-1.73354e-10
		0.00244	-4.0873e-10	-1.16858e-10	-1.73385e-10
		0.00246	-4.09187e-10	-1.1676e-10	-1.73426e-10
		0.00248	-4.09727e-10	-1.16658e-10	-1.73479e-10
		0.0025	-4.10356e-10	-1.16553e-10	-1.73549e-10
		0.00252	-4.11082e-10	-1.16448e-10	-1.73637e-10
		0.00254	-4.11911e-10	-1.16344e-10	-1.73749e-10
		0.00256	-4.12849e-10	-1.16243e-10	-1.73887e-10
		0.00258	-4.13904e-10	-1.16147e-10	-1.74055e-10
		0.0026	-4.15079e-10	-1.16061e-10	-1.74259e-10
		0.00262	-4.16381e-10	-1.15985e-10	-1.74501e-10
		0.00264	-4.17813e-10	-1.15924e-10	-1.74786e-10
		0.00266	-4.19381e-10	-1.15881e-10	-1.75118e-10
		0.00268	-4.21088e-10	-1.15858e-10	-1.75501e-10
		0.0027	-4.22936e-10	-1.15859e-10	-1.75941e-10
		0.00272	-4.24928e-10	-1.15888e-10	-1.76439e-10
		0.00274	-4.27066e-10	-1.15948e-10	-1.77001e-10
		0.00276	-4.29351e-10	-1.16043e-10	-1.77631e-10
		0.00278	-4.31783e-10	-1.16176e-10	-1.78331e-10
		0.0028	-4.34361e-10	-1.16351e-10	-1.79104e-10
		0.00282	-4.37085e-10	-1.1657e-10	-1.79955e-10
		0.00284	-4.39953e-10	-1.16838e-10	-1.80886e-10
		0.00286	-4.42963e-10	-1.17158e-10	-1.81898e-10
		0.00288	-4.46112e-10	-1.17532e-10	-1.82994e-10
		0.0029	-4.49397e-10	-1.17964e-10	-1.84177e-10
		0.00292	-4.52812e-10	-1.18456e-10	-1.85446e-10
		0.00294	-4.56354e-10	-1.19012e-10	-1.86803e-10
		0.00296	-4.60016e-10	-1.19633e-10	-1.88249e-10
		0.00298	-4.63793e-10	-1.20322e-10	-1.89784e-10
		0.003	-4.67676e-10	-1.21079e-10	-1.91407e-10
		0.00302	-4.7166e-10	-1.21908e-10	-1.93117e-10
		0.00304	-4.75735e-10	-1.22809e-10	-1.94914e-10
		0.00306	-4.79893e-10	-1.23782e-10	-1.96794e-10
		0.00308	-4.84125e-10	-1.24829e-10	-1.98757e-10
		0.0031	-4.88422e-10	-1.2595e-10	-2.00799e-10
		0.00312	-4.92774e-10	-1.27144e-10	-2.02917e-10
		0.00314	-4.9717e-10	-1.28411e-10	-2.05107e-10
		0.00316	-5.01601e-10	-1.2975e-10	-2.07366e-10
		0.00318	-5.06055e-10	-1.3116e-10	-2.09688e-10
		0.0032	-5.10521e-10	-1.32639e-10	-2.12068e-10
		0.00322	-5.14989e-10	-1.34185e-10	-2.14502e-10
		0.00324	-5.19448e-10	-1.35796e-10	-2.16983e-10
		0.00326	-5.23886e-10	-1.3747e-10	-2.19506e-10
		0.00328	-5.28293e-10	-1.39202e-10	-2.22064e-10
		0.0033	-5.32658e-10	-1.40991e-10	-2.24652e-10
		0.00332	-5.3697e-10	-1.42832e-10	-2.27261e-10
		0.00334	-5.41218e-10	-1.44721e-10	-2.29886e-10
		0.00336	-5.45392e-10	-1.46656e-10	-2.32519e-10
		0.00338	-5.49482e-10	-1.4863e-10	-2.35153e-10
		0.0034	-5.53478e-10	-1.5064e-10	-2.3778e-10
		0.00342	-5.57371e-10	-1.5268e-10	-2.40394e-10
		0.00344	-5.6115e-10	-1.54746e-10	-2.42987e-10
		0.00346	-5.64808e-10	-1.56833e-10	-2.4555e-10
		0.00348	-5.68337e-10	-1.58935e-10	-2.48078e-10
		0.0035	-5.71729e-10	-1.61046e-10	-2.50563e-10
		0.00352	-5.74976e-10	-1.63162e-10	-2.52998e-10
		0.00354	-5.78071e-10	-1.65276e-10	-2.55376e-10
		0.00356	-5.81009e-10	-1.67384e-10	-2.5769e-10
		0.00358	-5.83783e-10	-1.69479e-10	-2.59935e-10
		0.0036	-5.86389e-10	-1.71557e-10	-2.62104e-10
		0.00362	-5.88823e-10	-1.73611e-10	-2.64193e-10
		0.00364	-5.91081e-10	-1.75637e-10	-2.66195e-10
		0.00366	-5.93159e-10	-1.7763e-10	-2.68107e-10
		0.00368	-5.95055e-10	-1.79585e-10	-2.69925e-10
		0.0037	-5.96767e-10	-1.81497e-10	-2.71644e-10
		0.00372	-5.98294e-10	-1.83362e-10	-2.73261e-10
		0.00374	-5.99637e-10	-1.85176e-10	-2.74774e-10
		0.00376	-6.00795e-10	-1.86936e-10	-2.7618e-10
		0.00378	-6.0177e-10	-1.88636e-10	-2.77479e-10
		0.0038	-6.02564e-10	-1.90275e-10	-2.78667e-10
		0.00382	-6.03179e-10	-1.91849e-10	-2.79747e-10
		0.00384	-6.03618e-10	-1.93355e-10	-2.80715e-10
		0.00386	-6.03887e-10	-1.94791e-10	-2.81574e-10
		0.00388	-6.03989e-10	-1.96155e-10	-2.82323e-10
		0.0039	-6.0393e-10	-1.97446e-10	-2.82964e-10
		0.00392	-6.03715e-10	-1.98662e-10	-2.83499e-10
		0.00394	-6.03351e-10	-1.99801e-10	-2.8393e-10
		0.00396	-6.02844e-10	-2.00865e-10	-2.84259e-10
		0.00398	-6.02203e-10	-2.01852e-10	-2.8449e-10
		0.004	-6.01434e-10	-2.02762e-10	-2.84625e-10
		0.00402	-6.00546e-10	-2.03597e-10	-2.84669e-10
		0.00404	-5.99547e-10	-2.04356e-10	-2.84627e-10
		0.00406	-5.98448e-10	-2.05042e-10	-2.84501e-10
		0.00408	-5.97256e-10	-2.05655e-10	-2.84297e-10
		0.0041	-5.95983e-10	-2.06198e-10	-2.84019e-10
		0.00412	-5.94636e-10	-2.06672e-10	-2.83672e-10
		0.00414	-5.93226e-10	-2.07079e-10	-2.83262e-10
		0.00416	-5.91762e-10	-2.07423e-10	-2.82793e-10
		0.00418	-5.90252e-10	-2.07706e-10	-2.8227e-10
		0.0042	-5.88704e-10	-2.07931e-10	-2.81699e-10
		0.00422	-5.87127e-10	-2.08101e-10	-2.81086e-10
		0.00424	-5.85528e-10	-2.08221e-10	-2.80436e-10
		0.00426	-5.83915e-10	-2.08294e-10	-2.79755e-10
		0.00428	-5.82295e-10	-2.08322e-10	-2.79048e-10
		0.0043	-5.80673e-10	-2.08311e-10	-2.7832e-10
		0.00432	-5.79055e-10	-2.08262e-10	-2.77576e-10
		0.00434	-5.77446e-10	-2.08181e-10	-2.76819e-10
		0.00436	-5.75849e-10	-2.08068e-10	-2.76052e-10
		0.00438	-5.74267e-10	-2.07928e-10	-2.75278e-10
		0.0044	-5.72704e-10	-2.07764e-10	-2.74501e-10
		0.00442	-5.71161e-10	-2.07576e-10	-2.7372e-10
		0.00444	-5.69639e-10	-2.07369e-10	-2.72939e-10
		0.00446	-5.6814e-10	-2.07145e-10	-2.72159e-10
		0.00448	-5.66665e-10	-2.06904e-10	-2.7138e-10
		0.0045	-5.65214e-10	-2.0665e-10	-2.70603e-10
		0.00452	-5.63788e-10	-2.06383e-10	-2.6983e-10
		0.00454	-5.62385e-10	-2.06105e-10	-2.6906e-10
		0.00456	-5.61008e-10	-2.05818e-10	-2.68295e-10
		0.00458	-5.59654e-10	-2.05523e-10	-2.67534e-10
		0.0046	-5.58324e-10	-2.0522e-10	-2.66778e-10
		0.00462	-5.57018e-10	-2.04912e-10	-2.66027e-10
		0.00464	-5.55734e-10	-2.04599e-10	-2.6528e-10
		0.00466	-5.54473e-10	-2.04281e-10	-2.6454e-10
		0.00468	-5.53233e-10	-2.0396e-10	-2.63804e-10
		0.0047	-5.52014e-10	-2.03636e-10	-2.63074e-10
		0.00472	-5.50816e-10	-2.03309e-10	-2.62348e-10
		0.00474	-5.49637e-10	-2.02981e-10	-2.61629e-10
		0.00476	-5.48478e-10	-2.02652e-10	-2.60914e-10
		0.00478	-5.47336e-10	-2.02323e-10	-2.60204e-10
		0.0048	-5.46213e-10	-2.01993e-10	-2.595e-10
		0.00482	-5.45107e-10	-2.01663e-10	-2.58802e-10
		0.00484	-5.44017e-10	-2.01334e-10	-2.58108e-10
		0.00486	-5.42943e-10	-2.01006e-10	-2.57421e-10
		0.00488	-5.41884e-10	-2.00679e-10	-2.56739e-10
		0.0049	-5.40839e-10	-2.00353e-10	-2.56063e-10
		0.00492	-5.39807e-10	-2.00029e-10	-2.55392e-10
		0.00494	-5.38788e-10	-1.99707e-10	-2.54728e-10
		0.00496	-5.37782e-10	-1.99388e-10	-2.5407e-10
		0.00498	-5.36787e-10	-1.99071e-10	-2.53419e-10
		0.005	-5.35803e-10	-1.98756e-10	-2.52774e-10
		0.00502	-5.34831e-10	-1.98445e-10	-2.52136e-10
		0.00504	-5.33869e-10	-1.98136e-10	-2.51504e-10
		0.00506	-5.32919e-10	-1.97831e-10	-2.5088e-10
		0.00508	-5.31979e-10	-1.97528e-10	-2.50264e-10
		0.0051	-5.3105e-10	-1.97229e-10	-2.49655e-10
		0.00512	-5.30131e-10	-1.96932e-10	-2.49053e-10
		0.00514	-5.29221e-10	-1.96639e-10	-2.4846e-10
		0.00516	-5.2832e-10	-1.96349e-10	-2.47875e-10
		0.00518	-5.27425e-10	-1.96063e-10	-2.47297e-10
		0.0052	-5.26535e-10	-1.95781e-10	-2.46728e-10
		0.00522	-5.25646e-10	-1.95503e-10	-2.46169e-10
		0.00524	-5.24756e-10	-1.95231e-10	-2.4562e-10
		0.00526	-5.23862e-10	-1.94965e-10	-2.45082e-10
		0.00528	-5.22959e-10	-1.94706e-10	-2.44556e-10
		0.0053	-5.22044e-10	-1.94455e-10	-2.44042e-10
		0.00532	-5.21111e-10	-1.94212e-10	-2.43542e-10
		0.00534	-5.20156e-10	-1.93977e-10	-2.43055e-10
		0.00536	-5.19172e-10	-1.93751e-10	-2.42581e-10
		0.00538	-5.18154e-10	-1.93534e-10	-2.42119e-10
		0.0054	-5.17093e-10	-1.93325e-10	-2.41667e-10
		0.00542	-5.15984e-10	-1.93124e-10	-2.41224e-10
		0.00544	-5.14818e-10	-1.9293e-10	-2.40788e-10
		0.00546	-5.13588e-10	-1.92742e-10	-2.40356e-10
		0.00548	-5.12287e-10	-1.9256e-10	-2.39926e-10
		0.0055	-5.10908e-10	-1.92381e-10	-2.39495e-10
		0.00552	-5.09442e-10	-1.92204e-10	-2.39058e-10
		0.00554	-5.07885e-10	-1.92026e-10	-2.38613e-10
		0.00556	-5.06229e-10	-1.91847e-10	-2.38156e-10
		0.00558	-5.04469e-10	-1.91663e-10	-2.37682e-10
		0.0056	-5.02598e-10	-1.91473e-10	-2.37186e-10
		0.00562	-5.00614e-10	-1.91272e-10	-2.36666e-10
		0.00564	-4.9851e-10	-1.9106e-10	-2.36116e-10
		0.00566	-4.96283e-10	-1.90831e-10	-2.35531e-10
		0.00568	-4.9393e-10	-1.90584e-10	-2.34907e-10
		0.0057	-4.91447e-10	-1.90316e-10	-2.3424e-10
		0.00572	-4.88833e-10	-1.90022e-10	-2.33524e-10
		0.00574	-4.86085e-10	-1.897e-10	-2.32755e-10
		0.00576	-4.83203e-10	-1.89346e-10	-2.3193e-10
		0.00578	-4.80186e-10	-1.88958e-10	-2.31044e-10
		0.0058	-4.77035e-10	-1.88531e-10	-2.30093e-10
		0.00582	-4.73749e-10	-1.88063e-10	-2.29073e-10
		0.00584	-4.70332e-10	-1.8755e-10	-2.27981e-10
		0.00586	-4.66784e-10	-1.8699e-10	-2.26814e-10
		0.00588	-4.63109e-10	-1.86378e-10	-2.2557e-10
		0.0059	-4.59311e-10	-1.85713e-10	-2.24246e-10
		0.00592	-4.55394e-10	-1.84991e-10	-2.22841e-10
		0.00594	-4.51362e-10	-1.84211e-10	-2.21352e-10
		0.00596	-4.47223e-10	-1.83369e-10	-2.1978e-10
		0.00598	-4.42982e-10	-1.82465e-10	-2.18124e-10
		0.006	-4.38645e-10	-1.81495e-10	-2.16383e-10
		0.00602	-4.34221e-10	-1.80458e-10	-2.14558e-10
		0.00604	-4.29717e-10	-1.79354e-10	-2.12651e-10
		0.00606	-4.2514e-10	-1.78181e-10	-2.10661e-10
		0.00608	-4.205e-10	-1.76938e-10	-2.08591e-10
		0.0061	-4.15805e-10	-1.75625e-10	-2.06443e-10
		0.00612	-4.11064e-10	-1.74243e-10	-2.0422e-10
		0.00614	-4.06286e-10	-1.72791e-10	-2.01926e-10
		0.00616	-4.01481e-10	-1.71271e-10	-1.99564e-10
		0.00618	-3.96659e-10	-1.69683e-10	-1.97138e-10
		0.0062	-3.9183e-10	-1.68029e-10	-1.94652e-10
		0.00622	-3.87005e-10	-1.6631e-10	-1.92112e-10
		0.00624	-3.82194e-10	-1.64529e-10	-1.89523e-10
		0.00626	-3.77407e-10	-1.62688e-10	-1.8689e-10
		0.00628	-3.72655e-10	-1.6079e-10	-1.8422e-10
		0.0063	-3.67949e-10	-1.58838e-10	-1.81519e-10
		0.00632	-3.63298e-10	-1.56834e-10	-1.78793e-10
		0.00634	-3.58713e-10	-1.54784e-10	-1.76049e-10
		0.00636	-3.54204e-10	-1.5269e-10	-1.73294e-10
		0.00638	-3.4978e-10	-1.50557e-10	-1.70535e-10
		0.0064	-3.45452e-10	-1.48389e-10	-1.6778e-10
		0.00642	-3.41229e-10	-1.46191e-10	-1.65035e-10
		0.00644	-3.37118e-10	-1.43967e-10	-1.62308e-10
		0.00646	-3.3313e-10	-1.41723e-10	-1.59605e-10
		0.00648	-3.29271e-10	-1.39463e-10	-1.56935e-10
		0.0065	-3.25551e-10	-1.37193e-10	-1.54304e-10
		0.00652	-3.21975e-10	-1.34918e-10	-1.51718e-10
		0.00654	-3.18551e-10	-1.32644e-10	-1.49185e-10
		0.00656	-3.15285e-10	-1.30375e-10	-1.4671e-10
		0.00658	-3.12183e-10	-1.28117e-10	-1.443e-10
		0.0066	-3.09248e-10	-1.25875e-10	-1.4196e-10
		0.00662	-3.06485e-10	-1.23655e-10	-1.39697e-10
		0.00664	-3.03898e-10	-1.21462e-10	-1.37514e-10
		0.00666	-3.01489e-10	-1.19301e-10	-1.35417e-10
		0.00668	-2.99261e-10	-1.17176e-10	-1.3341e-10
		0.0067	-2.97215e-10	-1.15093e-10	-1.31497e-10
		0.00672	-2.95351e-10	-1.13055e-10	-1.29681e-10
		0.00674	-2.93671e-10	-1.11067e-10	-1.27965e-10
		0.00676	-2.92173e-10	-1.09132e-10	-1.26351e-10
		0.00678	-2.90857e-10	-1.07254e-10	-1.24842e-10
		0.0068	-2.89722e-10	-1.05437e-10	-1.23437e-10
		0.00682	-2.88763e-10	-1.03683e-10	-1.2214e-10
		0.00684	-2.8798e-10	-1.01995e-10	-1.20948e-10
		0.00686	-2.87368e-10	-1.00376e-10	-1.19864e-10
		0.00688	-2.86924e-10	-9.88273e-11	-1.18885e-10
		0.0069	-2.86642e-10	-9.73504e-11	-1.18011e-10
		0.00692	-2.86518e-10	-9.59467e-11	-1.17241e-10
		0.00694	-2.86545e-10	-9.46169e-11	-1.16572e-10
		0.00696	-2.86719e-10	-9.33617e-11	-1.16002e-10
		0.00698	-2.87031e-10	-9.2181e-11	-1.15528e-10
		0.007	-2.87474e-10	-9.10748e-11	-1.15148e-10
		0.00702	-2.88041e-10	-9.00426e-11	-1.14858e-10
		0.00704	-2.88724e-10	-8.90834e-11	-1.14654e-10
		0.00706	-2.89513e-10	-8.81964e-11	-1.14532e-10
		0.00708	-2.904e-10	-8.738e-11	-1.14488e-10
		0.0071	-2.91376e-10	-8.66328e-11	-1.14518e-10
		0.00712	-2.92429e-10	-8.59526e-11	-1.14617e-10
		0.00714	-2.93553e-10	-8.53375e-11	-1.14781e-10
		0.00716	-2.94738e-10	-8.47848e-11	-1.15004e-10
		0.00718	-2.95976e-10	-8.42919e-11	-1.15282e-10
		0.0072	-2.97258e-10	-8.38554e-11	-1.15609e-10
		0.00722	-2.98577e-10	-8.34722e-11	-1.1598e-10
		0.00724	-2.99925e-10	-8.31388e-11	-1.16391e-10
		0.00726	-3.01296e-10	-8.28518e-11	-1.16834e-10
		0.00728	-3.02683e-10	-8.26076e-11	-1.17306e-10
		0.0073	-3.0408e-10	-8.24029e-11	-1.17802e-10
		0.00732	-3.05483e-10	-8.22344e-11	-1.18317e-10
		0.00734	-3.06885e-10	-8.2099e-11	-1.18848e-10
		0.00736	-3.08283e-10	-8.1994e-11	-1.19391e-10
		0.00738	-3.09674e-10	-8.19166e-11	-1.19944e-10
		0.0074	-3.11054e-10	-8.18644e-11	-1.20504e-10
		0.00742	-3.12422e-10	-8.18351e-11	-1.2107e-10
		0.00744	-3.13777e-10	-8.18268e-11	-1.21639e-10
		0.00746	-3.15116e-10	-8.18374e-11	-1.22211e-10
		0.00748	-3.16439e-10	-8.18653e-11	-1.22784e-10
		0.0075	-3.17746e-10	-8.19088e-11	-1.23356e-10
		0.00752	-3.19036e-10	-8.19666e-11	-1.23929e-10
		0.00754	-3.20308e-10	-8.20371e-11	-1.24499e-10
		0.00756	-3.21562e-10	-8.21191e-11	-1.25068e-10
		0.00758	-3.22798e-10	-8.22114e-11	-1.25634e-10
		0.0076	-3.24015e-10	-8.2313e-11	-1.26197e-10
		0.00762	-3.25214e-10	-8.24229e-11	-1.26756e-10
		0.00764	-3.26395e-10	-8.25401e-11	-1.27311e-10
		0.00766	-3.27557e-10	-8.2664e-11	-1.27862e-10
		0.00768	-3.28702e-10	-8.27936e-11	-1.28408e-10
		0.0077	-3.29829e-10	-8.29283e-11	-1.2895e-10
		0.00772	-3.30938e-10	-8.30675e-11	-1.29487e-10
		0.00774	-3.3203e-10	-8.32105e-11	-1.30018e-10
		0.00776	-3.33106e-10	-8.33567e-11	-1.30544e-10
		0.00778	-3.34165e-10	-8.35056e-11	-1.31064e-10
		0.0078	-3.35208e-10	-8.36569e-11	-1.31579e-10
		0.00782	-3.36235e-10	-8.381e-11	-1.32088e-10
		0.00784	-3.37246e-10	-8.39648e-11	-1.3259e-10
		0.00786	-3.38242e-10	-8.41208e-11	-1.33087e-10
		0.00788	-3.39223e-10	-8.42779e-11	-1.33577e-10
		0.0079	-3.4019e-10	-8.44359e-11	-1.34061e-10
		0.00792	-3.41142e-10	-8.45944e-11	-1.34537e-10
		0.00794	-3.42079e-10	-8.47534e-11	-1.35007e-10
		0.00796	-3.43003e-10	-8.49126e-11	-1.3547e-10
		0.00798	-3.43912e-10	-8.50718e-11	-1.35926e-10
		0.008	-3.44808e-10	-8.52311e-11	-1.36375e-10
		0.00802	-3.4569e-10	-8.53904e-11	-1.36817e-10
		0.00804	-3.46558e-10	-8.55495e-11	-1.37252e-10
		0.00806	-3.47412e-10	-8.57086e-11	-1.37681e-10
		0.00808	-3.48254e-10	-8.58675e-11	-1.38103e-10
		0.0081	-3.49081e-10	-8.60261e-11	-1.38518e-10
		0.00812	-3.49895e-10	-8.61845e-11	-1.38927e-10
		0.00814	-3.50696e-10	-8.63425e-11	-1.39331e-10
		0.00816	-3.51483e-10	-8.65001e-11	-1.39728e-10
		0.00818	-3.52257e-10	-8.66574e-11	-1.40119e-10
		0.0082	-3.53017e-10	-8.68143e-11	-1.40505e-10
		0.00822	-3.53765e-10	-8.69707e-11	-1.40886e-10
		0.00824	-3.54499e-10	-8.71267e-11	-1.41261e-10
		0.00826	-3.5522e-10	-8.72821e-11	-1.41631e-10
		0.00828	-3.55929e-10	-8.74369e-11	-1.41997e-10
		0.0083	-3.56625e-10	-8.7591e-11	-1.42357e-10
		0.00832	-3.57308e-10	-8.77442e-11	-1.42713e-10
		0.00834	-3.5798e-10	-8.78967e-11	-1.43065e-10
		0.00836	-3.58639e-10	-8.80482e-11	-1.43413e-10
		0.00838	-3.59286e-10	-8.81988e-11	-1.43758e-10
		0.0084	-3.59921e-10	-8.83486e-11	-1.44099e-10
		0.00842	-3.60545e-10	-8.84975e-11	-1.44436e-10
		0.00844	-3.61157e-10	-8.86456e-11	-1.44771e-10
		0.00846	-3.61757e-10	-8.87929e-11	-1.45103e-10
		0.00848	-3.62345e-10	-8.89395e-11	-1.45432e-10
		0.0085	-3.62922e-10	-8.90853e-11	-1.45759e-10
		0.00852	-3.63488e-10	-8.92304e-11	-1.46084e-10
		0.00854	-3.64043e-10	-8.93749e-11	-1.46407e-10
		0.00856	-3.64586e-10	-8.95187e-11	-1.46728e-10
		0.00858	-3.65118e-10	-8.96619e-11	-1.47047e-10
		0.0086	-3.65639e-10	-8.98046e-11	-1.47364e-10
		0.00862	-3.66149e-10	-8.99467e-11	-1.47681e-10
		0.00864	-3.66649e-10	-9.00883e-11	-1.47995e-10
		0.00866	-3.67138e-10	-9.02294e-11	-1.48309e-10
		0.00868	-3.67619e-10	-9.037e-11	-1.48621e-10
		0.0087	-3.6809e-10	-9.05103e-11	-1.48932e-10
		0.00872	-3.68552e-10	-9.06502e-11	-1.49242e-10
		0.00874	-3.69006e-10	-9.079e-11	-1.49551e-10
		0.00876	-3.69453e-10	-9.09297e-11	-1.49859e-10
		0.00878	-3.69892e-10	-9.10693e-11	-1.50166e-10
		0.0088	-3.70324e-10	-9.1209e-11	-1.50471e-10
		0.00882	-3.70749e-10	-9.13488e-11	-1.50775e-10
		0.00884	-3.71167e-10	-9.14886e-11	-1.51077e-10
		0.00886	-3.71579e-10	-9.16285e-11	-1.51378e-10
		0.00888	-3.71983e-10	-9.17686e-11	-1.51677e-10
		0.0089	-3.72381e-10	-9.19088e-11	-1.51973e-10
		0.00892	-3.72773e-10	-9.20492e-11	-1.52267e-10
		0.00894	-3.73157e-10	-9.21899e-11	-1.52559e-10
		0.00896	-3.73535e-10	-9.23309e-11	-1.52847e-10
		0.00898	-3.73906e-10	-9.24723e-11	-1.53132e-10
		0.009	-3.74271e-10	-9.26142e-11	-1.53413e-10
		0.00902	-3.74629e-10	-9.27563e-11	-1.53691e-10
		0.00904	-3.74982e-10	-9.28989e-11	-1.53964e-10
		0.00906	-3.75329e-10	-9.30418e-11	-1.54233e-10
		0.00908	-3.7567e-10	-9.31848e-11	-1.54498e-10
		0.0091	-3.76007e-10	-9.3328e-11	-1.54758e-10
		0.00912	-3.76339e-10	-9.34712e-11	-1.55014e-10
		0.00914	-3.76668e-10	-9.36142e-11	-1.55265e-10
		0.00916	-3.76991e-10	-9.3757e-11	-1.5551e-10
		0.00918	-3.77311e-10	-9.38995e-11	-1.55751e-10
		0.0092	-3.77628e-10	-9.40415e-11	-1.55986e-10
		0.00922	-3.7794e-10	-9.4183e-11	-1.56215e-10
		0.00924	-3.78249e-10	-9.43239e-11	-1.56438e-10
		0.00926	-3.78554e-10	-9.44642e-11	-1.56655e-10
		0.00928	-3.78856e-10	-9.46038e-11	-1.56866e-10
		0.0093	-3.79155e-10	-9.47426e-11	-1.5707e-10
		0.00932	-3.79451e-10	-9.48806e-11	-1.57267e-10
		0.00934	-3.79744e-10	-9.50179e-11	-1.57457e-10
		0.00936	-3.80035e-10	-9.51545e-11	-1.57641e-10
		0.00938	-3.80323e-10	-9.52902e-11	-1.57818e-10
		0.0094	-3.8061e-10	-9.5425e-11	-1.57988e-10
		0.00942	-3.80895e-10	-9.5559e-11	-1.58152e-10
		0.00944	-3.81179e-10	-9.5692e-11	-1.58309e-10
		0.00946	-3.81462e-10	-9.5824e-11	-1.58459e-10
		0.00948	-3.81743e-10	-9.59551e-11	-1.58602e-10
		0.0095	-3.82024e-10	-9.60851e-11	-1.5874e-10
		0.00952	-3.82305e-10	-9.62141e-11	-1.58871e-10
		0.00954	-3.82584e-10	-9.6342e-11	-1.58996e-10
		0.00956	-3.82864e-10	-9.64687e-11	-1.59115e-10
		0.00958	-3.83143e-10	-9.65942e-11	-1.59229e-10
		0.0096	-3.83422e-10	-9.67185e-11	-1.59337e-10
		0.00962	-3.83701e-10	-9.68415e-11	-1.5944e-10
		0.00964	-3.83979e-10	-9.69633e-11	-1.59538e-10
		0.00966	-3.84256e-10	-9.70838e-11	-1.59632e-10
		0.00968	-3.84532e-10	-9.72029e-11	-1.59721e-10
		0.0097	-3.84806e-10	-9.73208e-11	-1.59806e-10
		0.00972	-3.85079e-10	-9.74373e-11	-1.59887e-10
		0.00974	-3.8535e-10	-9.75524e-11	-1.59965e-10
		0.00976	-3.85618e-10	-9.76662e-11	-1.60039e-10
		0.00978	-3.85885e-10	-9.77786e-11	-1.6011e-10
		0.0098	-3.8615e-10	-9.78897e-11	-1.60178e-10
		0.00982	-3.86413e-10	-9.79995e-11	-1.60244e-10
		0.00984	-3.86673e-10	-9.81079e-11	-1.60307e-10
		0.00986	-3.86932e-10	-9.82151e-11	-1.60368e-10
		0.00988	-3.87189e-10	-9.83209e-11	-1.60428e-10
		0.0099	-3.87444e-10	-9.84253e-11	-1.60486e-10
		0.00992	-3.87697e-10	-9.85282e-11	-1.60544e-10
		0.00994	-3.87948e-10	-9.86297e-11	-1.606e-10
		0.00996	-3.88196e-10	-9.87296e-11	-1.60657e-10
		0.00998	-3.88442e-10	-9.8828e-11	-1.60713e-10
		0.01	-3.88685e-10	-9.89247e-11	-1.60769e-10
		0.01002	-3.88925e-10	-9.90198e-11	-1.60825e-10
		0.01004	-3.89162e-10	-9.91131e-11	-1.6088e-10
		0.01006	-3.89395e-10	-9.92048e-11	-1.60936e-10
		0.01008	-3.89625e-10	-9.92947e-11	-1.60992e-10
		0.0101	-3.89853e-10	-9.93829e-11	-1.61049e-10
		0.01012	-3.90076e-10	-9.94695e-11	-1.61105e-10
		0.01014	-3.90296e-10	-9.95544e-11	-1.61162e-10
		0.01016	-3.90513e-10	-9.96376e-11	-1.6122e-10
		0.01018	-3.90726e-10	-9.97192e-11	-1.61278e-10
		0.0102	-3.90936e-10	-9.97992e-11	-1.61338e-10
		0.01022	-3.91141e-10	-9.98778e-11	-1.61399e-10
		0.01024	-3.91342e-10	-9.9955e-11	-1.61461e-10
		0.01026	-3.91539e-10	-1.00031e-10	-1.61526e-10
		0.01028	-3.91731e-10	-1.00106e-10	-1.61591e-10
		0.0103	-3.91918e-10	-1.00179e-10	-1.61659e-10
		0.01032	-3.921e-10	-1.00252e-10	-1.61729e-10
		0.01034	-3.92276e-10	-1.00324e-10	-1.618e-10
		0.01036	-3.92448e-10	-1.00395e-10	-1.61873e-10
		0.01038	-3.92614e-10	-1.00465e-10	-1.61948e-10
		0.0104	-3.92775e-10	-1.00535e-10	-1.62025e-10
		0.01042	-3.92931e-10	-1.00603e-10	-1.62103e-10
		0.01044	-3.93081e-10	-1.00671e-10	-1.62182e-10
		0.01046	-3.93227e-10	-1.00739e-10	-1.62264e-10
		0.01048	-3.93367e-10	-1.00805e-10	-1.62346e-10
		0.0105	-3.93503e-10	-1.00872e-10	-1.62431e-10
		0.01052	-3.93633e-10	-1.00937e-10	-1.62517e-10
		0.01054	-3.9376e-10	-1.01003e-10	-1.62605e-10
		0.01056	-3.93882e-10	-1.01067e-10	-1.62694e-10
		0.01058	-3.94e-10	-1.01132e-10	-1.62784e-10
		0.0106	-3.94115e-10	-1.01196e-10	-1.62876e-10
		0.01062	-3.94227e-10	-1.01259e-10	-1.62969e-10
		0.01064	-3.94336e-10	-1.01323e-10	-1.63063e-10
		0.01066	-3.94442e-10	-1.01386e-10	-1.63159e-10
		0.01068	-3.94546e-10	-1.01449e-10	-1.63255e-10
		0.0107	-3.94646e-10	-1.01512e-10	-1.63352e-10
		0.01072	-3.94744e-10	-1.01575e-10	-1.6345e-10
		0.01074	-3.94838e-10	-1.01638e-10	-1.63549e-10
		0.01076	-3.94929e-10	-1.01701e-10	-1.63648e-10
		0.01078	-3.95018e-10	-1.01763e-10	-1.63748e-10
		0.0108	-3.95103e-10	-1.01826e-10	-1.63848e-10
		0.01082	-3.95184e-10	-1.01889e-10	-1.63949e-10
		0.01084	-3.95263e-10	-1.01953e-10	-1.6405e-10
		0.01086	-3.95338e-10	-1.02017e-10	-1.64151e-10
		0.01088	-3.95411e-10	-1.02081e-10	-1.64252e-10
		0.0109	-3.95481e-10	-1.02146e-10	-1.64354e-10
		0.01092	-3.95549e-10	-1.02212e-10	-1.64455e-10
		0.01094	-3.95615e-10	-1.02278e-10	-1.64557e-10
		0.01096	-3.9568e-10	-1.02345e-10	-1.64658e-10
		0.01098	-3.95743e-10	-1.02413e-10	-1.6476e-10
		0.011	-3.95805e-10	-1.02481e-10	-1.64861e-10
		0.01102	-3.95866e-10	-1.0255e-10	-1.64961e-10
		0.01104	-3.95926e-10	-1.0262e-10	-1.65061e-10
		0.01106	-3.95985e-10	-1.0269e-10	-1.6516e-10
		0.01108	-3.96043e-10	-1.02761e-10	-1.65258e-10
		0.0111	-3.961e-10	-1.02833e-10	-1.65355e-10
		0.01112	-3.96155e-10	-1.02904e-10	-1.6545e-10
		0.01114	-3.96209e-10	-1.02977e-10	-1.65544e-10
		0.01116	-3.96262e-10	-1.0305e-10	-1.65636e-10
		0.01118	-3.96314e-10	-1.03123e-10	-1.65726e-10
		0.0112	-3.96365e-10	-1.03196e-10	-1.65815e-10
		0.01122	-3.96415e-10	-1.0327e-10	-1.65901e-10
		0.01124	-3.96465e-10	-1.03344e-10	-1.65985e-10
		0.01126	-3.96515e-10	-1.03419e-10	-1.66067e-10
		0.01128	-3.96566e-10	-1.03493e-10	-1.66147e-10
		0.0113	-3.96616e-10	-1.03567e-10	-1.66225e-10
		0.01132	-3.96666e-10	-1.03642e-10	-1.66301e-10
		0.01134	-3.96717e-10	-1.03716e-10	-1.66375e-10
		0.01136	-3.96769e-10	-1.03789e-10	-1.66447e-10
		0.01138	-3.9682e-10	-1.03862e-10	-1.66516e-10
		0.0114	-3.96872e-10	-1.03935e-10	-1.66583e-10
		0.01142	-3.96923e-10	-1.04008e-10	-1.66648e-10
		0.01144	-3.96975e-10	-1.0408e-10	-1.6671e-10
		0.01146	-3.97026e-10	-1.04151e-10	-1.6677e-10
		0.01148	-3.97077e-10	-1.04222e-10	-1.66828e-10
		0.0115	-3.97128e-10	-1.04293e-10	-1.66883e-10
		0.01152	-3.97179e-10	-1.04363e-10	-1.66936e-10
		0.01154	-3.9723e-10	-1.04433e-10	-1.66986e-10
		0.01156	-3.9728e-10	-1.04502e-10	-1.67034e-10
		0.01158	-3.97331e-10	-1.0457e-10	-1.67079e-10
		0.0116	-3.97383e-10	-1.04638e-10	-1.67123e-10
		0.01162	-3.97435e-10	-1.04705e-10	-1.67164e-10
		0.01164	-3.97489e-10	-1.04772e-10	-1.67204e-10
		0.01166	-3.97545e-10	-1.04838e-10	-1.67241e-10
		0.01168	-3.97603e-10	-1.04904e-10	-1.67277e-10
		0.0117	-3.97664e-10	-1.04969e-10	-1.67311e-10
		0.01172	-3.97728e-10	-1.05033e-10	-1.67344e-10
		0.01174	-3.97795e-10	-1.05097e-10	-1.67375e-10
		0.01176	-3.97866e-10	-1.05161e-10	-1.67405e-10
		0.01178	-3.97939e-10	-1.05224e-10	-1.67434e-10
		0.0118	-3.98017e-10	-1.05287e-10	-1.67462e-10
		0.01182	-3.98098e-10	-1.0535e-10	-1.67488e-10
		0.01184	-3.98183e-10	-1.05412e-10	-1.67514e-10
		0.01186	-3.98271e-10	-1.05474e-10	-1.67537e-10
		0.01188	-3.98363e-10	-1.05535e-10	-1.6756e-10
		0.0119	-3.98459e-10	-1.05596e-10	-1.67581e-10
		0.01192	-3.98558e-10	-1.05656e-10	-1.67601e-10
		0.01194	-3.9866e-10	-1.05716e-10	-1.67619e-10
		0.01196	-3.98765e-10	-1.05775e-10	-1.67635e-10
		0.01198	-3.98873e-10	-1.05834e-10	-1.6765e-10
		0.012	-3.98984e-10	-1.05892e-10	-1.67664e-10
		0.01202	-3.99097e-10	-1.0595e-10	-1.67676e-10
		0.01204	-3.99213e-10	-1.06007e-10	-1.67686e-10
		0.01206	-3.9933e-10	-1.06063e-10	-1.67696e-10
		0.01208	-3.9945e-10	-1.06118e-10	-1.67704e-10
		0.0121	-3.99572e-10	-1.06173e-10	-1.67711e-10
		0.01212	-3.99695e-10	-1.06226e-10	-1.67716e-10
		0.01214	-3.9982e-10	-1.06278e-10	-1.6772e-10
		0.01216	-3.99947e-10	-1.06329e-10	-1.67723e-10
		0.01218	-4.00075e-10	-1.06379e-10	-1.67725e-10
		0.0122	-4.00204e-10	-1.06427e-10	-1.67725e-10
		0.01222	-4.00333e-10	-1.06474e-10	-1.67724e-10
		0.01224	-4.00463e-10	-1.06519e-10	-1.67721e-10
		0.01226	-4.00593e-10	-1.06563e-10	-1.67717e-10
		0.01228	-4.00722e-10	-1.06604e-10	-1.67712e-10
		0.0123	-4.00851e-10	-1.06644e-10	-1.67705e-10
		0.01232	-4.00979e-10	-1.06682e-10	-1.67698e-10
		0.01234	-4.01106e-10	-1.06717e-10	-1.67689e-10
		0.01236	-4.01232e-10	-1.0675e-10	-1.6768e-10
		0.01238	-4.01356e-10	-1.06782e-10	-1.6767e-10
		0.0124	-4.01478e-10	-1.06811e-10	-1.67659e-10
		0.01242	-4.01599e-10	-1.06838e-10	-1.67649e-10
		0.01244	-4.01716e-10	-1.06864e-10	-1.67638e-10
		0.01246	-4.01831e-10	-1.06887e-10	-1.67628e-10
		0.01248	-4.01943e-10	-1.0691e-10	-1.67618e-10
		0.0125	-4.02052e-10	-1.0693e-10	-1.67608e-10
		0.01252	-4.02157e-10	-1.06949e-10	-1.676e-10
		0.01254	-4.02257e-10	-1.06967e-10	-1.67592e-10
		0.01256	-4.02353e-10	-1.06984e-10	-1.67585e-10
		0.01258	-4.02443e-10	-1.07001e-10	-1.6758e-10
		0.0126	-4.02529e-10	-1.07016e-10	-1.67576e-10
		0.01262	-4.02609e-10	-1.0703e-10	-1.67573e-10
		0.01264	-4.02683e-10	-1.07044e-10	-1.67571e-10
		0.01266	-4.02751e-10	-1.07057e-10	-1.67572e-10
		0.01268	-4.02814e-10	-1.0707e-10	-1.67574e-10
		0.0127	-4.02871e-10	-1.07082e-10	-1.67579e-10
		0.01272	-4.02923e-10	-1.07094e-10	-1.67585e-10
		0.01274	-4.0297e-10	-1.07106e-10	-1.67594e-10
		0.01276	-4.03012e-10	-1.07118e-10	-1.67606e-10
		0.01278	-4.0305e-10	-1.07131e-10	-1.67621e-10
		0.0128	-4.03083e-10	-1.07143e-10	-1.67638e-10
		0.01282	-4.03112e-10	-1.07156e-10	-1.67658e-10
		0.01284	-4.03136e-10	-1.0717e-10	-1.6768e-10
		0.01286	-4.03158e-10	-1.07184e-10	-1.67706e-10
		0.01288	-4.03176e-10	-1.072e-10	-1.67734e-10
		0.0129	-4.0319e-10	-1.07216e-10	-1.67765e-10
		0.01292	-4.03201e-10	-1.07234e-10	-1.67799e-10
		0.01294	-4.03209e-10	-1.07253e-10	-1.67836e-10
		0.01296	-4.03212e-10	-1.07273e-10	-1.67875e-10
		0.01298	-4.03212e-10	-1.07294e-10	-1.67917e-10
		0.013	-4.03208e-10	-1.07317e-10	-1.67961e-10
		0.01302	-4.032e-10	-1.07341e-10	-1.68008e-10
		0.01304	-4.03189e-10	-1.07366e-10	-1.68057e-10
		0.01306	-4.03175e-10	-1.07393e-10	-1.68108e-10
		0.01308	-4.03158e-10	-1.07421e-10	-1.68161e-10
		0.0131	-4.03139e-10	-1.0745e-10	-1.68217e-10
		0.01312	-4.03119e-10	-1.07481e-10	-1.68273e-10
		0.01314	-4.03098e-10	-1.07512e-10	-1.68332e-10
		0.01316	-4.03075e-10	-1.07545e-10	-1.68392e-10
		0.01318	-4.03052e-10	-1.07579e-10	-1.68453e-10
		0.0132	-4.03028e-10	-1.07613e-10	-1.68515e-10
		0.01322	-4.03002e-10	-1.07648e-10	-1.68577e-10
		0.01324	-4.02976e-10	-1.07684e-10	-1.68641e-10
		0.01326	-4.0295e-10	-1.07721e-10	-1.68704e-10
		0.01328	-4.02922e-10	-1.07758e-10	-1.68768e-10
		0.0133	-4.02895e-10	-1.07796e-10	-1.68832e-10
		0.01332	-4.02867e-10	-1.07834e-10	-1.68896e-10
		0.01334	-4.0284e-10	-1.07873e-10	-1.6896e-10
		0.01336	-4.02813e-10	-1.07913e-10	-1.69023e-10
		0.01338	-4.02787e-10	-1.07953e-10	-1.69086e-10
		0.0134	-4.02762e-10	-1.07993e-10	-1.69149e-10
		0.01342	-4.02739e-10	-1.08033e-10	-1.69211e-10
		0.01344	-4.02718e-10	-1.08073e-10	-1.69271e-10
		0.01346	-4.02699e-10	-1.08114e-10	-1.69331e-10
		0.01348	-4.02682e-10	-1.08154e-10	-1.6939e-10
		0.0135	-4.02667e-10	-1.08194e-10	-1.69448e-10
		0.01352	-4.02655e-10	-1.08234e-10	-1.69503e-10
		0.01354	-4.02645e-10	-1.08273e-10	-1.69558e-10
		0.01356	-4.02638e-10	-1.08313e-10	-1.6961e-10
		0.01358	-4.02633e-10	-1.08352e-10	-1.6966e-10
		0.0136	-4.0263e-10	-1.0839e-10	-1.69708e-10
		0.01362	-4.0263e-10	-1.08428e-10	-1.69754e-10
		0.01364	-4.0263e-10	-1.08466e-10	-1.69798e-10
		0.01366	-4.02633e-10	-1.08503e-10	-1.69839e-10
		0.01368	-4.02636e-10	-1.0854e-10	-1.69878e-10
		0.0137	-4.02642e-10	-1.08577e-10	-1.69914e-10
		0.01372	-4.02648e-10	-1.08613e-10	-1.69948e-10
		0.01374	-4.02657e-10	-1.08649e-10	-1.69979e-10
		0.01376	-4.02667e-10	-1.08684e-10	-1.70008e-10
		0.01378	-4.02678e-10	-1.08718e-10	-1.70035e-10
		0.0138	-4.02691e-10	-1.08753e-10	-1.70059e-10
		0.01382	-4.02706e-10	-1.08787e-10	-1.70082e-10
		0.01384	-4.02722e-10	-1.0882e-10	-1.70101e-10
		0.01386	-4.02739e-10	-1.08854e-10	-1.7012e-10
		0.01388	-4.02756e-10	-1.08887e-10	-1.70136e-10
		0.0139	-4.02775e-10	-1.0892e-10	-1.70151e-10
		0.01392	-4.02794e-10	-1.08954e-10	-1.70165e-10
		0.01394	-4.02814e-10	-1.08987e-10	-1.70178e-10
		0.01396	-4.02834e-10	-1.0902e-10	-1.70191e-10
		0.01398	-4.02855e-10	-1.09053e-10	-1.70204e-10
		0.014	-4.02876e-10	-1.09086e-10	-1.70217e-10
		0.01402	-4.02897e-10	-1.09119e-10	-1.70231e-10
		0.01404	-4.02918e-10	-1.09153e-10	-1.70246e-10
		0.01406	-4.02939e-10	-1.09186e-10	-1.70261e-10
		0.01408	-4.0296e-10	-1.0922e-10	-1.70278e-10
		0.0141	-4.0298e-10	-1.09254e-10	-1.70297e-10
		0.01412	-4.03001e-10	-1.09288e-10	-1.70317e-10
		0.01414	-4.0302e-10	-1.09322e-10	-1.70338e-10
		0.01416	-4.0304e-10	-1.09356e-10	-1.70362e-10
		0.01418	-4.03059e-10	-1.0939e-10	-1.70388e-10
		0.0142	-4.03077e-10	-1.09424e-10	-1.70415e-10
		0.01422	-4.03096e-10	-1.09458e-10	-1.70444e-10
		0.01424	-4.03115e-10	-1.09492e-10	-1.70476e-10
		0.01426	-4.03133e-10	-1.09526e-10	-1.70509e-10
		0.01428	-4.03152e-10	-1.0956e-10	-1.70544e-10
		0.0143	-4.03172e-10	-1.09594e-10	-1.70581e-10
		0.01432	-4.03191e-10	-1.09628e-10	-1.7062e-10
		0.01434	-4.0321e-10	-1.09661e-10	-1.7066e-10
		0.01436	-4.0323e-10	-1.09695e-10	-1.70703e-10
		0.01438	-4.03249e-10	-1.09728e-10	-1.70747e-10
		0.0144	-4.03268e-10	-1.0976e-10	-1.70792e-10
		0.01442	-4.03287e-10	-1.09791e-10	-1.70838e-10
		0.01444	-4.03305e-10	-1.09821e-10	-1.70886e-10
		0.01446	-4.03322e-10	-1.09851e-10	-1.70934e-10
		0.01448	-4.03338e-10	-1.09879e-10	-1.70983e-10
		0.0145	-4.03354e-10	-1.09906e-10	-1.71033e-10
		0.01452	-4.03369e-10	-1.09931e-10	-1.71084e-10
		0.01454	-4.03383e-10	-1.09955e-10	-1.71135e-10
		0.01456	-4.03397e-10	-1.09978e-10	-1.71187e-10
		0.01458	-4.0341e-10	-1.09999e-10	-1.71239e-10
		0.0146	-4.03423e-10	-1.10018e-10	-1.71292e-10
		0.01462	-4.03436e-10	-1.10036e-10	-1.71345e-10
		0.01464	-4.03448e-10	-1.10052e-10	-1.71397e-10
		0.01466	-4.0346e-10	-1.10066e-10	-1.7145e-10
		0.01468	-4.03471e-10	-1.10079e-10	-1.71503e-10
		0.0147	-4.03481e-10	-1.1009e-10	-1.71555e-10
		0.01472	-4.03491e-10	-1.10099e-10	-1.71607e-10
		0.01474	-4.035e-10	-1.10107e-10	-1.71658e-10
		0.01476	-4.03508e-10	-1.10113e-10	-1.71709e-10
		0.01478	-4.03515e-10	-1.10118e-10	-1.71759e-10
		0.0148	-4.03522e-10	-1.10121e-10	-1.71808e-10
		0.01482	-4.03526e-10	-1.10123e-10	-1.71857e-10
		0.01484	-4.0353e-10	-1.10123e-10	-1.71905e-10
		0.01486	-4.03532e-10	-1.10121e-10	-1.71952e-10
		0.01488	-4.03534e-10	-1.10118e-10	-1.71999e-10
		0.0149	-4.03535e-10	-1.10114e-10	-1.72044e-10
		0.01492	-4.03536e-10	-1.10109e-10	-1.72089e-10
		0.01494	-4.03537e-10	-1.10103e-10	-1.72133e-10
		0.01496	-4.03538e-10	-1.10096e-10	-1.72177e-10
		0.01498	-4.03541e-10	-1.10089e-10	-1.72219e-10
		0.015	-4.03546e-10	-1.10082e-10	-1.7226e-10
		0.01502	-4.03552e-10	-1.10075e-10	-1.72301e-10
		0.01504	-4.0356e-10	-1.10069e-10	-1.7234e-10
		0.01506	-4.03569e-10	-1.10063e-10	-1.72378e-10
		0.01508	-4.03581e-10	-1.10057e-10	-1.72415e-10
		0.0151	-4.03594e-10	-1.10053e-10	-1.7245e-10
		0.01512	-4.03608e-10	-1.1005e-10	-1.72484e-10
		0.01514	-4.03624e-10	-1.10048e-10	-1.72516e-10
		0.01516	-4.03641e-10	-1.10048e-10	-1.72546e-10
		0.01518	-4.0366e-10	-1.1005e-10	-1.72574e-10
		0.0152	-4.0368e-10	-1.10053e-10	-1.726e-10
		0.01522	-4.03701e-10	-1.10058e-10	-1.72625e-10
		0.01524	-4.03724e-10	-1.10064e-10	-1.72647e-10
		0.01526	-4.03748e-10	-1.10073e-10	-1.72666e-10
		0.01528	-4.03774e-10	-1.10083e-10	-1.72684e-10
		0.0153	-4.03801e-10	-1.10096e-10	-1.72698e-10
		0.01532	-4.03829e-10	-1.1011e-10	-1.7271e-10
		0.01534	-4.03859e-10	-1.10127e-10	-1.7272e-10
		0.01536	-4.03891e-10	-1.10145e-10	-1.72726e-10
		0.01538	-4.03924e-10	-1.10166e-10	-1.72729e-10
		0.0154	-4.03958e-10	-1.10189e-10	-1.7273e-10
		0.01542	-4.03993e-10	-1.10214e-10	-1.72727e-10
		0.01544	-4.0403e-10	-1.10242e-10	-1.72722e-10
		0.01546	-4.04067e-10	-1.10271e-10	-1.72715e-10
		0.01548	-4.04106e-10	-1.10303e-10	-1.72704e-10
		0.0155	-4.04146e-10	-1.10337e-10	-1.72692e-10
		0.01552	-4.04187e-10	-1.10372e-10	-1.72677e-10
		0.01554	-4.04228e-10	-1.1041e-10	-1.72661e-10
		0.01556	-4.04271e-10	-1.10449e-10	-1.72643e-10
		0.01558	-4.04314e-10	-1.1049e-10	-1.72624e-10
		0.0156	-4.04358e-10	-1.10533e-10	-1.72604e-10
		0.01562	-4.04402e-10	-1.10576e-10	-1.72583e-10
		0.01564	-4.04447e-10	-1.10622e-10	-1.72561e-10
		0.01566	-4.04492e-10	-1.10668e-10	-1.72539e-10
		0.01568	-4.04536e-10	-1.10715e-10	-1.72516e-10
		0.0157	-4.0458e-10	-1.10762e-10	-1.72492e-10
		0.01572	-4.04623e-10	-1.10811e-10	-1.72468e-10
		0.01574	-4.04665e-10	-1.10859e-10	-1.72444e-10
		0.01576	-4.04706e-10	-1.10908e-10	-1.72419e-10
		0.01578	-4.04746e-10	-1.10958e-10	-1.72395e-10
		0.0158	-4.04786e-10	-1.11007e-10	-1.7237e-10
		0.01582	-4.04824e-10	-1.11056e-10	-1.72346e-10
		0.01584	-4.04861e-10	-1.11104e-10	-1.72321e-10
		0.01586	-4.04898e-10	-1.11152e-10	-1.72297e-10
		0.01588	-4.04934e-10	-1.112e-10	-1.72273e-10
		0.0159	-4.0497e-10	-1.11247e-10	-1.72249e-10
		0.01592	-4.05004e-10	-1.11293e-10	-1.72225e-10
		0.01594	-4.05039e-10	-1.11338e-10	-1.72201e-10
		0.01596	-4.05073e-10	-1.11382e-10	-1.72177e-10
		0.01598	-4.05106e-10	-1.11425e-10	-1.72153e-10
		0.016	-4.0514e-10	-1.11467e-10	-1.7213e-10
		0.01602	-4.05173e-10	-1.11507e-10	-1.72106e-10
		0.01604	-4.05206e-10	-1.11546e-10	-1.72083e-10
		0.01606	-4.05239e-10	-1.11584e-10	-1.7206e-10
		0.01608	-4.05272e-10	-1.1162e-10	-1.72037e-10
		0.0161	-4.05304e-10	-1.11655e-10	-1.72015e-10
		0.01612	-4.05335e-10	-1.11689e-10	-1.71993e-10
		0.01614	-4.05366e-10	-1.1172e-10	-1.71972e-10
		0.01616	-4.05395e-10	-1.1175e-10	-1.71952e-10
		0.01618	-4.05424e-10	-1.11778e-10	-1.71933e-10
		0.0162	-4.05451e-10	-1.11805e-10	-1.71914e-10
		0.01622	-4.05477e-10	-1.11829e-10	-1.71897e-10
		0.01624	-4.05502e-10	-1.11851e-10	-1.71881e-10
		0.01626	-4.05525e-10	-1.11872e-10	-1.71865e-10
		0.01628	-4.05546e-10	-1.1189e-10	-1.71851e-10
		0.0163	-4.05564e-10	-1.11906e-10	-1.71838e-10
		0.01632	-4.05581e-10	-1.1192e-10	-1.71826e-10
		0.01634	-4.05594e-10	-1.11933e-10	-1.71815e-10
		0.01636	-4.05605e-10	-1.11943e-10	-1.71805e-10
		0.01638	-4.05614e-10	-1.11952e-10	-1.71797e-10
		0.0164	-4.05619e-10	-1.1196e-10	-1.71789e-10
		0.01642	-4.05621e-10	-1.11966e-10	-1.71783e-10
		0.01644	-4.05621e-10	-1.11972e-10	-1.71779e-10
		0.01646	-4.05618e-10	-1.11976e-10	-1.71776e-10
		0.01648	-4.05612e-10	-1.11979e-10	-1.71775e-10
		0.0165	-4.05604e-10	-1.11982e-10	-1.71776e-10
		0.01652	-4.05593e-10	-1.11983e-10	-1.71778e-10
		0.01654	-4.0558e-10	-1.11984e-10	-1.71783e-10
		0.01656	-4.05564e-10	-1.11985e-10	-1.7179e-10
		0.01658	-4.05547e-10	-1.11984e-10	-1.71799e-10
		0.0166	-4.05528e-10	-1.11984e-10	-1.7181e-10
		0.01662	-4.05507e-10	-1.11983e-10	-1.71824e-10
		0.01664	-4.05484e-10	-1.11981e-10	-1.71839e-10
		0.01666	-4.05461e-10	-1.1198e-10	-1.71857e-10
		0.01668	-4.05436e-10	-1.11978e-10	-1.71878e-10
		0.0167	-4.0541e-10	-1.11976e-10	-1.719e-10
		0.01672	-4.05383e-10	-1.11974e-10	-1.71926e-10
		0.01674	-4.05356e-10	-1.11972e-10	-1.71953e-10
		0.01676	-4.05328e-10	-1.11969e-10	-1.71983e-10
		0.01678	-4.053e-10	-1.11968e-10	-1.72016e-10
		0.0168	-4.05271e-10	-1.11966e-10	-1.7205e-10
		0.01682	-4.05241e-10	-1.11965e-10	-1.72087e-10
		0.01684	-4.0521e-10	-1.11963e-10	-1.72126e-10
		0.01686	-4.05177e-10	-1.11963e-10	-1.72166e-10
		0.01688	-4.05143e-10	-1.11962e-10	-1.72209e-10
		0.0169	-4.05107e-10	-1.11962e-10	-1.72254e-10
		0.01692	-4.05069e-10	-1.11962e-10	-1.72301e-10
		0.01694	-4.05029e-10	-1.11962e-10	-1.7235e-10
		0.01696	-4.04987e-10	-1.11963e-10	-1.724e-10
		0.01698	-4.04944e-10	-1.11963e-10	-1.72453e-10
		0.017	-4.04898e-10	-1.11964e-10	-1.72507e-10
		0.01702	-4.04851e-10	-1.11964e-10	-1.72563e-10
		0.01704	-4.04803e-10	-1.11965e-10	-1.7262e-10
		0.01706	-4.04754e-10	-1.11966e-10	-1.72679e-10
		0.01708	-4.04704e-10	-1.11967e-10	-1.7274e-10
		0.0171	-4.04654e-10	-1.11968e-10	-1.72802e-10
		0.01712	-4.04603e-10	-1.11969e-10	-1.72866e-10
		0.01714	-4.04552e-10	-1.1197e-10	-1.7293e-10
		0.01716	-4.04502e-10	-1.1197e-10	-1.72996e-10
		0.01718	-4.04453e-10	-1.11971e-10	-1.73063e-10
		0.0172	-4.04404e-10	-1.11972e-10	-1.7313e-10
		0.01722	-4.04357e-10	-1.11973e-10	-1.73198e-10
		0.01724	-4.04312e-10	-1.11974e-10	-1.73265e-10
		0.01726	-4.04267e-10	-1.11976e-10	-1.73333e-10
		0.01728	-4.04225e-10	-1.11978e-10	-1.73401e-10
		0.0173	-4.04185e-10	-1.1198e-10	-1.73468e-10
		0.01732	-4.04148e-10	-1.11983e-10	-1.73534e-10
		0.01734	-4.04113e-10	-1.11986e-10	-1.73599e-10
		0.01736	-4.04081e-10	-1.1199e-10	-1.73663e-10
		0.01738	-4.04052e-10	-1.11994e-10	-1.73726e-10
		0.0174	-4.04027e-10	-1.11999e-10	-1.73786e-10
		0.01742	-4.04004e-10	-1.12005e-10	-1.73845e-10
		0.01744	-4.03985e-10	-1.12011e-10	-1.73901e-10
		0.01746	-4.03969e-10	-1.12018e-10	-1.73955e-10
		0.01748	-4.03955e-10	-1.12025e-10	-1.74005e-10
		0.0175	-4.03945e-10	-1.12033e-10	-1.74052e-10
		0.01752	-4.03937e-10	-1.12041e-10	-1.74096e-10
		0.01754	-4.03931e-10	-1.1205e-10	-1.74136e-10
		0.01756	-4.03928e-10	-1.1206e-10	-1.74173e-10
		0.01758	-4.03927e-10	-1.1207e-10	-1.74205e-10
		0.0176	-4.0393e-10	-1.12081e-10	-1.74234e-10
		0.01762	-4.03935e-10	-1.12093e-10	-1.74258e-10
		0.01764	-4.03943e-10	-1.12106e-10	-1.74279e-10
		0.01766	-4.03955e-10	-1.1212e-10	-1.74296e-10
		0.01768	-4.0397e-10	-1.12134e-10	-1.74309e-10
		0.0177	-4.03988e-10	-1.12149e-10	-1.74319e-10
		0.01772	-4.04009e-10	-1.12164e-10	-1.74326e-10
		0.01774	-4.04033e-10	-1.1218e-10	-1.74329e-10
		0.01776	-4.04059e-10	-1.12197e-10	-1.74329e-10
		0.01778	-4.04087e-10	-1.12214e-10	-1.74327e-10
		0.0178	-4.04116e-10	-1.12231e-10	-1.74323e-10
		0.01782	-4.04147e-10	-1.12248e-10	-1.74316e-10
		0.01784	-4.04178e-10	-1.12266e-10	-1.74308e-10
		0.01786	-4.0421e-10	-1.12284e-10	-1.74298e-10
		0.01788	-4.04243e-10	-1.12302e-10	-1.74286e-10
		0.0179	-4.04275e-10	-1.1232e-10	-1.74273e-10
		0.01792	-4.04306e-10	-1.12339e-10	-1.7426e-10
		0.01794	-4.04337e-10	-1.12357e-10	-1.74246e-10
		0.01796	-4.04368e-10	-1.12376e-10	-1.74231e-10
		0.01798	-4.04397e-10	-1.12394e-10	-1.74217e-10
		0.018	-4.04425e-10	-1.12413e-10	-1.74202e-10
		0.01802	-4.04452e-10	-1.12431e-10	-1.74189e-10
		0.01804	-4.04477e-10	-1.1245e-10	-1.74176e-10
		0.01806	-4.045e-10	-1.12469e-10	-1.74165e-10
		0.01808	-4.04522e-10	-1.12488e-10	-1.74154e-10
		0.0181	-4.04542e-10	-1.12507e-10	-1.74146e-10
		0.01812	-4.0456e-10	-1.12528e-10	-1.74138e-10
		0.01814	-4.04576e-10	-1.12549e-10	-1.74133e-10
		0.01816	-4.0459e-10	-1.12571e-10	-1.74129e-10
		0.01818	-4.04602e-10	-1.12594e-10	-1.74128e-10
		0.0182	-4.04611e-10	-1.12618e-10	-1.74128e-10
		0.01822	-4.04618e-10	-1.12644e-10	-1.74131e-10
		0.01824	-4.04623e-10	-1.1267e-10	-1.74137e-10
		0.01826	-4.04625e-10	-1.12698e-10	-1.74144e-10
		0.01828	-4.04625e-10	-1.12728e-10	-1.74154e-10
		0.0183	-4.04622e-10	-1.12759e-10	-1.74167e-10
		0.01832	-4.04617e-10	-1.12791e-10	-1.74181e-10
		0.01834	-4.0461e-10	-1.12824e-10	-1.74198e-10
		0.01836	-4.046e-10	-1.12858e-10	-1.74217e-10
		0.01838	-4.04587e-10	-1.12893e-10	-1.74237e-10
		0.0184	-4.04573e-10	-1.12928e-10	-1.74258e-10
		0.01842	-4.04556e-10	-1.12964e-10	-1.74281e-10
		0.01844	-4.04537e-10	-1.13e-10	-1.74304e-10
		0.01846	-4.04516e-10	-1.13036e-10	-1.74328e-10
		0.01848	-4.04493e-10	-1.13072e-10	-1.74352e-10
		0.0185	-4.04469e-10	-1.13108e-10	-1.74376e-10
		0.01852	-4.04443e-10	-1.13144e-10	-1.74399e-10
		0.01854	-4.04416e-10	-1.1318e-10	-1.74422e-10
		0.01856	-4.04387e-10	-1.13216e-10	-1.74445e-10
		0.01858	-4.04357e-10	-1.13252e-10	-1.74466e-10
		0.0186	-4.04326e-10	-1.13288e-10	-1.74487e-10
		0.01862	-4.04294e-10	-1.13323e-10	-1.74506e-10
		0.01864	-4.0426e-10	-1.13358e-10	-1.74524e-10
		0.01866	-4.04226e-10	-1.13392e-10	-1.74541e-10
		0.01868	-4.0419e-10	-1.13426e-10	-1.74556e-10
		0.0187	-4.04153e-10	-1.13459e-10	-1.7457e-10
		0.01872	-4.04116e-10	-1.13491e-10	-1.74581e-10
		0.01874	-4.04077e-10	-1.13522e-10	-1.7459e-10
		0.01876	-4.04037e-10	-1.13553e-10	-1.74597e-10
		0.01878	-4.03997e-10	-1.13583e-10	-1.74602e-10
		0.0188	-4.03956e-10	-1.13611e-10	-1.74605e-10
		0.01882	-4.03916e-10	-1.1364e-10	-1.74605e-10
		0.01884	-4.03877e-10	-1.13667e-10	-1.74602e-10
		0.01886	-4.03838e-10	-1.13693e-10	-1.74597e-10
		0.01888	-4.03801e-10	-1.13719e-10	-1.74589e-10
		0.0189	-4.03766e-10	-1.13744e-10	-1.74578e-10
		0.01892	-4.03733e-10	-1.13768e-10	-1.74565e-10
		0.01894	-4.03702e-10	-1.13792e-10	-1.74549e-10
		0.01896	-4.03673e-10	-1.13815e-10	-1.7453e-10
		0.01898	-4.03646e-10	-1.13837e-10	-1.74509e-10
		0.019	-4.03621e-10	-1.13859e-10	-1.74485e-10
		0.01902	-4.03598e-10	-1.1388e-10	-1.74459e-10
		0.01904	-4.03577e-10	-1.139e-10	-1.74431e-10
		0.01906	-4.03557e-10	-1.1392e-10	-1.744e-10
		0.01908	-4.03539e-10	-1.13939e-10	-1.74366e-10
		0.0191	-4.03522e-10	-1.13958e-10	-1.74331e-10
		0.01912	-4.03507e-10	-1.13976e-10	-1.74293e-10
		0.01914	-4.03493e-10	-1.13993e-10	-1.74252e-10
		0.01916	-4.03481e-10	-1.1401e-10	-1.7421e-10
		0.01918	-4.0347e-10	-1.14026e-10	-1.74164e-10
		0.0192	-4.03461e-10	-1.14042e-10	-1.74117e-10
		0.01922	-4.03454e-10	-1.14058e-10	-1.74066e-10
		0.01924	-4.03448e-10	-1.14073e-10	-1.74014e-10
		0.01926	-4.03444e-10	-1.14088e-10	-1.73959e-10
		0.01928	-4.03441e-10	-1.14102e-10	-1.73902e-10
		0.0193	-4.0344e-10	-1.14115e-10	-1.73843e-10
		0.01932	-4.0344e-10	-1.14128e-10	-1.73781e-10
		0.01934	-4.03441e-10	-1.14141e-10	-1.73718e-10
		0.01936	-4.03443e-10	-1.14153e-10	-1.73652e-10
		0.01938	-4.03445e-10	-1.14165e-10	-1.73585e-10
		0.0194	-4.03449e-10	-1.14177e-10	-1.73516e-10
		0.01942	-4.03454e-10	-1.14188e-10	-1.73445e-10
		0.01944	-4.0346e-10	-1.142e-10	-1.73373e-10
		0.01946	-4.03468e-10	-1.14211e-10	-1.73299e-10
		0.01948	-4.03478e-10	-1.14223e-10	-1.73225e-10
		0.0195	-4.03489e-10	-1.14234e-10	-1.73149e-10
		0.01952	-4.03502e-10	-1.14246e-10	-1.73072e-10
		0.01954	-4.03518e-10	-1.14257e-10	-1.72994e-10
		0.01956	-4.03535e-10	-1.14269e-10	-1.72916e-10
		0.01958	-4.03554e-10	-1.14281e-10	-1.72837e-10
		0.0196	-4.03574e-10	-1.14293e-10	-1.72757e-10
		0.01962	-4.03595e-10	-1.14306e-10	-1.72678e-10
		0.01964	-4.03617e-10	-1.14319e-10	-1.72598e-10
		0.01966	-4.0364e-10	-1.14332e-10	-1.72518e-10
		0.01968	-4.03663e-10	-1.14346e-10	-1.72438e-10
		0.0197	-4.03687e-10	-1.14361e-10	-1.72358e-10
		0.01972	-4.03711e-10	-1.14375e-10	-1.72279e-10
		0.01974	-4.03736e-10	-1.14391e-10	-1.722e-10
		0.01976	-4.03761e-10	-1.14407e-10	-1.72121e-10
		0.01978	-4.03788e-10	-1.14424e-10	-1.72042e-10
		0.0198	-4.03815e-10	-1.14441e-10	-1.71964e-10
		0.01982	-4.03843e-10	-1.14459e-10	-1.71886e-10
		0.01984	-4.03871e-10	-1.14477e-10	-1.71809e-10
		0.01986	-4.03901e-10	-1.14496e-10	-1.71732e-10
		0.01988	-4.0393e-10	-1.14515e-10	-1.71656e-10
		0.0199	-4.03959e-10	-1.14535e-10	-1.71581e-10
		0.01992	-4.03988e-10	-1.14556e-10	-1.71507e-10
		0.01994	-4.04016e-10	-1.14576e-10	-1.71434e-10
		0.01996	-4.04044e-10	-1.14597e-10	-1.71361e-10
		0.01998	-4.04071e-10	-1.14618e-10	-1.7129e-10
		0.02	-4.04097e-10	-1.14639e-10	-1.7122e-10
		0.02002	-4.04121e-10	-1.14659e-10	-1.71152e-10
		0.02004	-4.04145e-10	-1.14679e-10	-1.71086e-10
		0.02006	-4.04169e-10	-1.14698e-10	-1.71021e-10
		0.02008	-4.04192e-10	-1.14717e-10	-1.70959e-10
		0.0201	-4.04214e-10	-1.14735e-10	-1.70899e-10
		0.02012	-4.04236e-10	-1.14752e-10	-1.70842e-10
		0.02014	-4.04257e-10	-1.14768e-10	-1.70788e-10
		0.02016	-4.04277e-10	-1.14783e-10	-1.70738e-10
		0.02018	-4.04296e-10	-1.14797e-10	-1.70691e-10
		0.0202	-4.04315e-10	-1.1481e-10	-1.70648e-10
		0.02022	-4.04333e-10	-1.14822e-10	-1.70608e-10
		0.02024	-4.0435e-10	-1.14832e-10	-1.70573e-10
		0.02026	-4.04367e-10	-1.14842e-10	-1.70542e-10
		0.02028	-4.04383e-10	-1.1485e-10	-1.70515e-10
		0.0203	-4.04399e-10	-1.14858e-10	-1.70493e-10
		0.02032	-4.04415e-10	-1.14864e-10	-1.70474e-10
		0.02034	-4.04431e-10	-1.14869e-10	-1.7046e-10
		0.02036	-4.04447e-10	-1.14874e-10	-1.70449e-10
		0.02038	-4.04464e-10	-1.14877e-10	-1.70443e-10
		0.0204	-4.04481e-10	-1.1488e-10	-1.7044e-10
		0.02042	-4.04498e-10	-1.14882e-10	-1.7044e-10
		0.02044	-4.04516e-10	-1.14884e-10	-1.70444e-10
		0.02046	-4.04534e-10	-1.14885e-10	-1.70451e-10
		0.02048	-4.04552e-10	-1.14886e-10	-1.7046e-10
		0.0205	-4.04571e-10	-1.14887e-10	-1.70472e-10
		0.02052	-4.0459e-10	-1.14887e-10	-1.70487e-10
		0.02054	-4.04608e-10	-1.14886e-10	-1.70503e-10
		0.02056	-4.04626e-10	-1.14885e-10	-1.70521e-10
		0.02058	-4.04644e-10	-1.14884e-10	-1.70541e-10
		0.0206	-4.04662e-10	-1.14882e-10	-1.70563e-10
		0.02062	-4.04679e-10	-1.1488e-10	-1.70585e-10
		0.02064	-4.04695e-10	-1.14878e-10	-1.70608e-10
		0.02066	-4.0471e-10	-1.14876e-10	-1.70632e-10
		0.02068	-4.04725e-10	-1.14873e-10	-1.70656e-10
		0.0207	-4.04738e-10	-1.14871e-10	-1.7068e-10
		0.02072	-4.04751e-10	-1.14868e-10	-1.70705e-10
		0.02074	-4.04762e-10	-1.14865e-10	-1.70729e-10
		0.02076	-4.04773e-10	-1.14862e-10	-1.70753e-10
		0.02078	-4.04783e-10	-1.14859e-10	-1.70777e-10
		0.0208	-4.04793e-10	-1.14856e-10	-1.70801e-10
		0.02082	-4.04802e-10	-1.14852e-10	-1.70825e-10
		0.02084	-4.04811e-10	-1.14849e-10	-1.70848e-10
		0.02086	-4.04819e-10	-1.14845e-10	-1.7087e-10
		0.02088	-4.04827e-10	-1.14842e-10	-1.70893e-10
		0.0209	-4.04835e-10	-1.14839e-10	-1.70915e-10
		0.02092	-4.04842e-10	-1.14836e-10	-1.70936e-10
		0.02094	-4.04849e-10	-1.14833e-10	-1.70957e-10
		0.02096	-4.04855e-10	-1.14831e-10	-1.70977e-10
		0.02098	-4.04861e-10	-1.14829e-10	-1.70997e-10
		0.021	-4.04866e-10	-1.14828e-10	-1.71017e-10
		0.02102	-4.04871e-10	-1.14828e-10	-1.71037e-10
		0.02104	-4.04876e-10	-1.14828e-10	-1.71056e-10
		0.02106	-4.04881e-10	-1.1483e-10	-1.71076e-10
		0.02108	-4.04887e-10	-1.14833e-10	-1.71096e-10
		0.0211	-4.04894e-10	-1.14838e-10	-1.71116e-10
		0.02112	-4.04901e-10	-1.14844e-10	-1.71136e-10
		0.02114	-4.0491e-10	-1.14852e-10	-1.71158e-10
		0.02116	-4.0492e-10	-1.14862e-10	-1.71179e-10
		0.02118	-4.04931e-10	-1.14874e-10	-1.71202e-10
		0.0212	-4.04943e-10	-1.14887e-10	-1.71225e-10
		0.02122	-4.04957e-10	-1.14903e-10	-1.71249e-10
		0.02124	-4.04971e-10	-1.1492e-10	-1.71274e-10
		0.02126	-4.04987e-10	-1.1494e-10	-1.71298e-10
		0.02128	-4.05005e-10	-1.14961e-10	-1.71323e-10
		0.0213	-4.05023e-10	-1.14984e-10	-1.71349e-10
		0.02132	-4.05043e-10	-1.15009e-10	-1.71374e-10
		0.02134	-4.05064e-10	-1.15035e-10	-1.71399e-10
		0.02136	-4.05086e-10	-1.15063e-10	-1.71423e-10
		0.02138	-4.05109e-10	-1.15091e-10	-1.71447e-10
		0.0214	-4.05133e-10	-1.15121e-10	-1.7147e-10
		0.02142	-4.05159e-10	-1.15152e-10	-1.71493e-10
		0.02144	-4.05185e-10	-1.15185e-10	-1.71513e-10
		0.02146	-4.05211e-10	-1.15218e-10	-1.71533e-10
		0.02148	-4.05238e-10	-1.15252e-10	-1.71551e-10
		0.0215	-4.05264e-10	-1.15286e-10	-1.71567e-10
		0.02152	-4.05291e-10	-1.15322e-10	-1.71582e-10
		0.02154	-4.05317e-10	-1.15358e-10	-1.71595e-10
		0.02156	-4.05342e-10	-1.15394e-10	-1.71606e-10
		0.02158	-4.05368e-10	-1.15431e-10	-1.71615e-10
		0.0216	-4.05392e-10	-1.15467e-10	-1.71621e-10
		0.02162	-4.05417e-10	-1.15504e-10	-1.71626e-10
		0.02164	-4.0544e-10	-1.1554e-10	-1.71627e-10
		0.02166	-4.05463e-10	-1.15575e-10	-1.71627e-10
		0.02168	-4.05486e-10	-1.1561e-10	-1.71624e-10
		0.0217	-4.05508e-10	-1.15645e-10	-1.71618e-10
		0.02172	-4.05528e-10	-1.15678e-10	-1.7161e-10
		0.02174	-4.05547e-10	-1.15711e-10	-1.71599e-10
		0.02176	-4.05565e-10	-1.15742e-10	-1.71586e-10
		0.02178	-4.05582e-10	-1.15773e-10	-1.71571e-10
		0.0218	-4.05598e-10	-1.15802e-10	-1.71554e-10
		0.02182	-4.05613e-10	-1.1583e-10	-1.71535e-10
		0.02184	-4.05626e-10	-1.15857e-10	-1.71514e-10
		0.02186	-4.05638e-10	-1.15882e-10	-1.71491e-10
		0.02188	-4.0565e-10	-1.15906e-10	-1.71466e-10
		0.0219	-4.0566e-10	-1.15928e-10	-1.7144e-10
		0.02192	-4.0567e-10	-1.15948e-10	-1.71412e-10
		0.02194	-4.05679e-10	-1.15968e-10	-1.71381e-10
		0.02196	-4.05687e-10	-1.15985e-10	-1.71349e-10
		0.02198	-4.05693e-10	-1.16001e-10	-1.71316e-10
		0.022	-4.05699e-10	-1.16015e-10	-1.7128e-10
		0.02202	-4.05703e-10	-1.16028e-10	-1.71243e-10
		0.02204	-4.05705e-10	-1.16038e-10	-1.71205e-10
		0.02206	-4.05706e-10	-1.16048e-10	-1.71165e-10
		0.02208	-4.05705e-10	-1.16055e-10	-1.71123e-10
		0.0221	-4.05702e-10	-1.16061e-10	-1.7108e-10
		0.02212	-4.05698e-10	-1.16066e-10	-1.71036e-10
		0.02214	-4.05692e-10	-1.16069e-10	-1.70991e-10
		0.02216	-4.05685e-10	-1.1607e-10	-1.70944e-10
		0.02218	-4.05678e-10	-1.1607e-10	-1.70897e-10
		0.0222	-4.05669e-10	-1.16068e-10	-1.70849e-10
		0.02222	-4.0566e-10	-1.16064e-10	-1.70801e-10
		0.02224	-4.0565e-10	-1.16059e-10	-1.70752e-10
		0.02226	-4.0564e-10	-1.16052e-10	-1.70704e-10
		0.02228	-4.05629e-10	-1.16044e-10	-1.70656e-10
		0.0223	-4.05617e-10	-1.16034e-10	-1.70609e-10
		0.02232	-4.05604e-10	-1.16023e-10	-1.70563e-10
		0.02234	-4.0559e-10	-1.1601e-10	-1.70519e-10
		0.02236	-4.05576e-10	-1.15996e-10	-1.70477e-10
		0.02238	-4.05561e-10	-1.1598e-10	-1.70438e-10
		0.0224	-4.05545e-10	-1.15962e-10	-1.70402e-10
		0.02242	-4.05529e-10	-1.15943e-10	-1.70369e-10
		0.02244	-4.05514e-10	-1.15923e-10	-1.70339e-10
		0.02246	-4.055e-10	-1.15901e-10	-1.70313e-10
		0.02248	-4.05485e-10	-1.15877e-10	-1.70291e-10
		0.0225	-4.05472e-10	-1.15852e-10	-1.70274e-10
		0.02252	-4.05459e-10	-1.15826e-10	-1.7026e-10
		0.02254	-4.05448e-10	-1.15798e-10	-1.70251e-10
		0.02256	-4.05439e-10	-1.15769e-10	-1.70247e-10
		0.02258	-4.05431e-10	-1.15738e-10	-1.70247e-10
		0.0226	-4.05426e-10	-1.15707e-10	-1.70252e-10
		0.02262	-4.05422e-10	-1.15674e-10	-1.70261e-10
		0.02264	-4.05422e-10	-1.1564e-10	-1.70274e-10
		0.02266	-4.05424e-10	-1.15605e-10	-1.70291e-10
		0.02268	-4.0543e-10	-1.15569e-10	-1.70312e-10
		0.0227	-4.05439e-10	-1.15533e-10	-1.70337e-10
		0.02272	-4.05451e-10	-1.15496e-10	-1.70366e-10
		0.02274	-4.05466e-10	-1.15459e-10	-1.70398e-10
		0.02276	-4.05485e-10	-1.15422e-10	-1.70433e-10
		0.02278	-4.05506e-10	-1.15385e-10	-1.7047e-10
		0.0228	-4.05529e-10	-1.15349e-10	-1.7051e-10
		0.02282	-4.05554e-10	-1.15312e-10	-1.70552e-10
		0.02284	-4.05582e-10	-1.15277e-10	-1.70596e-10
		0.02286	-4.05612e-10	-1.15242e-10	-1.70642e-10
		0.02288	-4.05643e-10	-1.15208e-10	-1.70688e-10
		0.0229	-4.05677e-10	-1.15175e-10	-1.70736e-10
		0.02292	-4.05713e-10	-1.15143e-10	-1.70784e-10
		0.02294	-4.05751e-10	-1.15111e-10	-1.70832e-10
		0.02296	-4.05791e-10	-1.15081e-10	-1.7088e-10
		0.02298	-4.05833e-10	-1.15052e-10	-1.70929e-10
		0.023	-4.05877e-10	-1.15024e-10	-1.70976e-10
		0.02302	-4.05922e-10	-1.14996e-10	-1.71024e-10
		0.02304	-4.05969e-10	-1.1497e-10	-1.7107e-10
		0.02306	-4.06018e-10	-1.14945e-10	-1.71116e-10
		0.02308	-4.06067e-10	-1.14921e-10	-1.71161e-10
		0.0231	-4.06118e-10	-1.14898e-10	-1.71205e-10
		0.02312	-4.06169e-10	-1.14875e-10	-1.71247e-10
		0.02314	-4.06221e-10	-1.14854e-10	-1.71288e-10
		0.02316	-4.06274e-10	-1.14834e-10	-1.71327e-10
		0.02318	-4.06326e-10	-1.14815e-10	-1.71365e-10
		0.0232	-4.0638e-10	-1.14798e-10	-1.71401e-10
		0.02322	-4.06433e-10	-1.14782e-10	-1.71435e-10
		0.02324	-4.06486e-10	-1.14767e-10	-1.71468e-10
		0.02326	-4.06539e-10	-1.14755e-10	-1.71498e-10
		0.02328	-4.06593e-10	-1.14744e-10	-1.71526e-10
		0.0233	-4.06645e-10	-1.14735e-10	-1.71552e-10
		0.02332	-4.06698e-10	-1.14728e-10	-1.71575e-10
		0.02334	-4.06749e-10	-1.14723e-10	-1.71597e-10
		0.02336	-4.068e-10	-1.14721e-10	-1.71616e-10
		0.02338	-4.06849e-10	-1.1472e-10	-1.71633e-10
		0.0234	-4.06897e-10	-1.14722e-10	-1.71647e-10
		0.02342	-4.06943e-10	-1.14726e-10	-1.71659e-10
		0.02344	-4.06987e-10	-1.14732e-10	-1.71668e-10
		0.02346	-4.0703e-10	-1.1474e-10	-1.71674e-10
		0.02348	-4.07071e-10	-1.1475e-10	-1.71678e-10
		0.0235	-4.0711e-10	-1.14761e-10	-1.71678e-10
		0.02352	-4.07149e-10	-1.14774e-10	-1.71675e-10
		0.02354	-4.07186e-10	-1.14789e-10	-1.71669e-10
		0.02356	-4.07222e-10	-1.14806e-10	-1.71661e-10
		0.02358	-4.07257e-10	-1.14824e-10	-1.71649e-10
		0.0236	-4.07291e-10	-1.14844e-10	-1.71635e-10
		0.02362	-4.07324e-10	-1.14865e-10	-1.71618e-10
		0.02364	-4.07357e-10	-1.14888e-10	-1.71598e-10
		0.02366	-4.07388e-10	-1.14913e-10	-1.71576e-10
		0.02368	-4.07418e-10	-1.14938e-10	-1.71551e-10
		0.0237	-4.07448e-10	-1.14965e-10	-1.71524e-10
		0.02372	-4.07477e-10	-1.14993e-10	-1.71495e-10
		0.02374	-4.07504e-10	-1.15022e-10	-1.71463e-10
		0.02376	-4.0753e-10	-1.15052e-10	-1.71429e-10
		0.02378	-4.07554e-10	-1.15082e-10	-1.71393e-10
		0.0238	-4.07577e-10	-1.15113e-10	-1.71354e-10
		0.02382	-4.07597e-10	-1.15144e-10	-1.71314e-10
		0.02384	-4.07615e-10	-1.15176e-10	-1.71272e-10
		0.02386	-4.0763e-10	-1.15208e-10	-1.71229e-10
		0.02388	-4.07643e-10	-1.15239e-10	-1.71184e-10
		0.0239	-4.07654e-10	-1.15271e-10	-1.71138e-10
		0.02392	-4.07661e-10	-1.15302e-10	-1.71092e-10
		0.02394	-4.07667e-10	-1.15333e-10	-1.71045e-10
		0.02396	-4.0767e-10	-1.15363e-10	-1.70999e-10
		0.02398	-4.07671e-10	-1.15393e-10	-1.70953e-10
		0.024	-4.07671e-10	-1.15421e-10	-1.70908e-10
		0.02402	-4.07669e-10	-1.15449e-10	-1.70865e-10
		0.02404	-4.07665e-10	-1.15476e-10	-1.70823e-10
		0.02406	-4.0766e-10	-1.15502e-10	-1.70783e-10
		0.02408	-4.07654e-10	-1.15527e-10	-1.70745e-10
		0.0241	-4.07647e-10	-1.15551e-10	-1.70709e-10
		0.02412	-4.0764e-10	-1.15573e-10	-1.70677e-10
		0.02414	-4.07632e-10	-1.15594e-10	-1.70647e-10
		0.02416	-4.07623e-10	-1.15614e-10	-1.7062e-10
		0.02418	-4.07614e-10	-1.15632e-10	-1.70597e-10
		0.0242	-4.07605e-10	-1.1565e-10	-1.70577e-10
		0.02422	-4.07596e-10	-1.15667e-10	-1.70561e-10
		0.02424	-4.07587e-10	-1.15682e-10	-1.70549e-10
		0.02426	-4.07579e-10	-1.15696e-10	-1.70541e-10
		0.02428	-4.07571e-10	-1.1571e-10	-1.70536e-10
		0.0243	-4.07564e-10	-1.15722e-10	-1.70536e-10
		0.02432	-4.07558e-10	-1.15734e-10	-1.70539e-10
		0.02434	-4.07554e-10	-1.15745e-10	-1.70547e-10
		0.02436	-4.07552e-10	-1.15756e-10	-1.70558e-10
		0.02438	-4.07552e-10	-1.15766e-10	-1.70573e-10
		0.0244	-4.07554e-10	-1.15776e-10	-1.70592e-10
		0.02442	-4.07558e-10	-1.15787e-10	-1.70615e-10
		0.02444	-4.07564e-10	-1.15797e-10	-1.70642e-10
		0.02446	-4.07572e-10	-1.15808e-10	-1.70672e-10
		0.02448	-4.07583e-10	-1.15819e-10	-1.70705e-10
		0.0245	-4.07596e-10	-1.1583e-10	-1.70742e-10
		0.02452	-4.07611e-10	-1.15842e-10	-1.70782e-10
		0.02454	-4.07628e-10	-1.15854e-10	-1.70824e-10
		0.02456	-4.07648e-10	-1.15867e-10	-1.7087e-10
		0.02458	-4.0767e-10	-1.1588e-10	-1.70919e-10
		0.0246	-4.07694e-10	-1.15894e-10	-1.7097e-10
		0.02462	-4.0772e-10	-1.15908e-10	-1.71023e-10
		0.02464	-4.07748e-10	-1.15923e-10	-1.71079e-10
		0.02466	-4.07778e-10	-1.15939e-10	-1.71137e-10
		0.02468	-4.0781e-10	-1.15956e-10	-1.71198e-10
		0.0247	-4.07844e-10	-1.15973e-10	-1.7126e-10
		0.02472	-4.07879e-10	-1.15991e-10	-1.71325e-10
		0.02474	-4.07916e-10	-1.1601e-10	-1.71391e-10
		0.02476	-4.07953e-10	-1.1603e-10	-1.71459e-10
		0.02478	-4.07991e-10	-1.1605e-10	-1.71528e-10
		0.0248	-4.0803e-10	-1.1607e-10	-1.71598e-10
		0.02482	-4.08069e-10	-1.16092e-10	-1.71668e-10
		0.02484	-4.08109e-10	-1.16114e-10	-1.71738e-10
		0.02486	-4.08148e-10	-1.16137e-10	-1.71808e-10
		0.02488	-4.08187e-10	-1.16161e-10	-1.71878e-10
		0.0249	-4.08226e-10	-1.16186e-10	-1.71948e-10
		0.02492	-4.08264e-10	-1.16211e-10	-1.72016e-10
		0.02494	-4.08302e-10	-1.16238e-10	-1.72083e-10
		0.02496	-4.08339e-10	-1.16265e-10	-1.72148e-10
		0.02498	-4.08376e-10	-1.16294e-10	-1.72212e-10
		0.025	-4.08412e-10	-1.16323e-10	-1.72273e-10
		0.02502	-4.08446e-10	-1.16352e-10	-1.72333e-10
		0.02504	-4.0848e-10	-1.16382e-10	-1.7239e-10
		0.02506	-4.08512e-10	-1.16413e-10	-1.72445e-10
		0.02508	-4.08543e-10	-1.16443e-10	-1.72498e-10
		0.0251	-4.08571e-10	-1.16474e-10	-1.72548e-10
		0.02512	-4.08597e-10	-1.16504e-10	-1.72596e-10
		0.02514	-4.08621e-10	-1.16534e-10	-1.72641e-10
		0.02516	-4.08642e-10	-1.16563e-10	-1.72684e-10
		0.02518	-4.08661e-10	-1.16591e-10	-1.72724e-10
		0.0252	-4.08676e-10	-1.16619e-10	-1.72761e-10
		0.02522	-4.0869e-10	-1.16645e-10	-1.72795e-10
		0.02524	-4.08701e-10	-1.1667e-10	-1.72827e-10
		0.02526	-4.08709e-10	-1.16693e-10	-1.72857e-10
		0.02528	-4.08715e-10	-1.16715e-10	-1.72883e-10
		0.0253	-4.08718e-10	-1.16735e-10	-1.72907e-10
		0.02532	-4.0872e-10	-1.16754e-10	-1.72929e-10
		0.02534	-4.0872e-10	-1.16771e-10	-1.72947e-10
		0.02536	-4.08718e-10	-1.16786e-10	-1.72963e-10
		0.02538	-4.08714e-10	-1.16799e-10	-1.72977e-10
		0.0254	-4.0871e-10	-1.16811e-10	-1.72988e-10
		0.02542	-4.08704e-10	-1.16821e-10	-1.72996e-10
		0.02544	-4.08697e-10	-1.16829e-10	-1.73003e-10
		0.02546	-4.08688e-10	-1.16836e-10	-1.73007e-10
		0.02548	-4.08678e-10	-1.16841e-10	-1.73009e-10
		0.0255	-4.08667e-10	-1.16845e-10	-1.73008e-10
		0.02552	-4.08654e-10	-1.16848e-10	-1.73005e-10
		0.02554	-4.0864e-10	-1.16848e-10	-1.73001e-10
		0.02556	-4.08623e-10	-1.16848e-10	-1.72994e-10
		0.02558	-4.08606e-10	-1.16846e-10	-1.72985e-10
		0.0256	-4.08587e-10	-1.16842e-10	-1.72974e-10
		0.02562	-4.08566e-10	-1.16837e-10	-1.72962e-10
		0.02564	-4.08544e-10	-1.1683e-10	-1.72947e-10
		0.02566	-4.0852e-10	-1.16822e-10	-1.72932e-10
		0.02568	-4.08496e-10	-1.16812e-10	-1.72915e-10
		0.0257	-4.0847e-10	-1.16801e-10	-1.72898e-10
		0.02572	-4.08443e-10	-1.16788e-10	-1.72879e-10
		0.02574	-4.08416e-10	-1.16774e-10	-1.7286e-10
		0.02576	-4.08389e-10	-1.16758e-10	-1.7284e-10
		0.02578	-4.08361e-10	-1.1674e-10	-1.7282e-10
		0.0258	-4.08334e-10	-1.16721e-10	-1.728e-10
		0.02582	-4.08308e-10	-1.167e-10	-1.72779e-10
		0.02584	-4.08282e-10	-1.16678e-10	-1.72758e-10
		0.02586	-4.08257e-10	-1.16655e-10	-1.72736e-10
		0.02588	-4.08234e-10	-1.16631e-10	-1.72714e-10
		0.0259	-4.08212e-10	-1.16606e-10	-1.72691e-10
		0.02592	-4.08193e-10	-1.16579e-10	-1.72668e-10
		0.02594	-4.08175e-10	-1.16552e-10	-1.72644e-10
		0.02596	-4.08159e-10	-1.16524e-10	-1.72619e-10
		0.02598	-4.08146e-10	-1.16495e-10	-1.72593e-10
		0.026	-4.08135e-10	-1.16466e-10	-1.72566e-10
		0.02602	-4.08126e-10	-1.16435e-10	-1.72539e-10
		0.02604	-4.08119e-10	-1.16404e-10	-1.7251e-10
		0.02606	-4.08114e-10	-1.16372e-10	-1.72481e-10
		0.02608	-4.08113e-10	-1.16339e-10	-1.7245e-10
		0.0261	-4.08113e-10	-1.16305e-10	-1.72419e-10
		0.02612	-4.08116e-10	-1.16271e-10	-1.72387e-10
		0.02614	-4.0812e-10	-1.16236e-10	-1.72355e-10
		0.02616	-4.08127e-10	-1.162e-10	-1.72321e-10
		0.02618	-4.08136e-10	-1.16163e-10	-1.72288e-10
		0.0262	-4.08146e-10	-1.16127e-10	-1.72254e-10
		0.02622	-4.08159e-10	-1.16089e-10	-1.7222e-10
		0.02624	-4.08172e-10	-1.16052e-10	-1.72185e-10
		0.02626	-4.08187e-10	-1.16014e-10	-1.72151e-10
		0.02628	-4.08204e-10	-1.15977e-10	-1.72117e-10
		0.0263	-4.08222e-10	-1.1594e-10	-1.72082e-10
		0.02632	-4.08242e-10	-1.15902e-10	-1.72048e-10
		0.02634	-4.08262e-10	-1.15865e-10	-1.72015e-10
		0.02636	-4.08284e-10	-1.15829e-10	-1.71982e-10
		0.02638	-4.08306e-10	-1.15792e-10	-1.71949e-10
		0.0264	-4.08329e-10	-1.15756e-10	-1.71917e-10
		0.02642	-4.08353e-10	-1.1572e-10	-1.71885e-10
		0.02644	-4.08376e-10	-1.15685e-10	-1.71855e-10
		0.02646	-4.08399e-10	-1.15651e-10	-1.71825e-10
		0.02648	-4.08423e-10	-1.15617e-10	-1.71797e-10
		0.0265	-4.08446e-10	-1.15585e-10	-1.7177e-10
		0.02652	-4.08468e-10	-1.15553e-10	-1.71744e-10
		0.02654	-4.0849e-10	-1.15523e-10	-1.71719e-10
		0.02656	-4.0851e-10	-1.15494e-10	-1.71696e-10
		0.02658	-4.0853e-10	-1.15467e-10	-1.71674e-10
		0.0266	-4.08548e-10	-1.15441e-10	-1.71654e-10
		0.02662	-4.08566e-10	-1.15416e-10	-1.71635e-10
		0.02664	-4.08581e-10	-1.15394e-10	-1.71618e-10
		0.02666	-4.08595e-10	-1.15372e-10	-1.71602e-10
		0.02668	-4.08608e-10	-1.15353e-10	-1.71587e-10
		0.0267	-4.08619e-10	-1.15334e-10	-1.71573e-10
		0.02672	-4.08629e-10	-1.15318e-10	-1.7156e-10
		0.02674	-4.08638e-10	-1.15303e-10	-1.71549e-10
		0.02676	-4.08646e-10	-1.15289e-10	-1.71539e-10
		0.02678	-4.08653e-10	-1.15277e-10	-1.71529e-10
		0.0268	-4.08661e-10	-1.15267e-10	-1.71521e-10
		0.02682	-4.08667e-10	-1.15258e-10	-1.71514e-10
		0.02684	-4.08674e-10	-1.1525e-10	-1.71507e-10
		0.02686	-4.08681e-10	-1.15243e-10	-1.71502e-10
		0.02688	-4.08687e-10	-1.15238e-10	-1.71497e-10
		0.0269	-4.08693e-10	-1.15234e-10	-1.71493e-10
		0.02692	-4.08699e-10	-1.1523e-10	-1.7149e-10
		0.02694	-4.08704e-10	-1.15228e-10	-1.71488e-10
		0.02696	-4.08709e-10	-1.15226e-10	-1.71486e-10
		0.02698	-4.08713e-10	-1.15225e-10	-1.71484e-10
		0.027	-4.08717e-10	-1.15224e-10	-1.71482e-10
		0.02702	-4.0872e-10	-1.15224e-10	-1.71479e-10
		0.02704	-4.08722e-10	-1.15224e-10	-1.71477e-10
		0.02706	-4.08724e-10	-1.15225e-10	-1.71473e-10
		0.02708	-4.08726e-10	-1.15226e-10	-1.71469e-10
		0.0271	-4.08728e-10	-1.15227e-10	-1.71464e-10
		0.02712	-4.08731e-10	-1.15229e-10	-1.71458e-10
		0.02714	-4.08733e-10	-1.1523e-10	-1.71451e-10
		0.02716	-4.08736e-10	-1.15232e-10	-1.71443e-10
		0.02718	-4.08739e-10	-1.15234e-10	-1.71435e-10
		0.0272	-4.08742e-10	-1.15236e-10	-1.71425e-10
		0.02722	-4.08746e-10	-1.15238e-10	-1.71416e-10
		0.02724	-4.08749e-10	-1.1524e-10	-1.71405e-10
		0.02726	-4.08752e-10	-1.15242e-10	-1.71395e-10
		0.02728	-4.08754e-10	-1.15244e-10	-1.71384e-10
		0.0273	-4.08756e-10	-1.15247e-10	-1.71374e-10
		0.02732	-4.08758e-10	-1.15249e-10	-1.71363e-10
		0.02734	-4.08759e-10	-1.15251e-10	-1.71353e-10
		0.02736	-4.08759e-10	-1.15253e-10	-1.71343e-10
		0.02738	-4.08758e-10	-1.15255e-10	-1.71333e-10
		0.0274	-4.08757e-10	-1.15257e-10	-1.71324e-10
		0.02742	-4.08754e-10	-1.15259e-10	-1.71316e-10
		0.02744	-4.0875e-10	-1.15261e-10	-1.71308e-10
		0.02746	-4.08745e-10	-1.15264e-10	-1.71301e-10
		0.02748	-4.08738e-10	-1.15266e-10	-1.71295e-10
		0.0275	-4.08731e-10	-1.15269e-10	-1.71289e-10
		0.02752	-4.08722e-10	-1.15273e-10	-1.71285e-10
		0.02754	-4.08712e-10	-1.15276e-10	-1.71282e-10
		0.02756	-4.08701e-10	-1.15281e-10	-1.7128e-10
		0.02758	-4.08689e-10	-1.15286e-10	-1.71279e-10
		0.0276	-4.08676e-10	-1.15293e-10	-1.71279e-10
		0.02762	-4.08662e-10	-1.15301e-10	-1.7128e-10
		0.02764	-4.08647e-10	-1.1531e-10	-1.71283e-10
		0.02766	-4.08632e-10	-1.15321e-10	-1.71288e-10
		0.02768	-4.08617e-10	-1.15333e-10	-1.71293e-10
		0.0277	-4.08601e-10	-1.15347e-10	-1.71301e-10
		0.02772	-4.08585e-10	-1.15363e-10	-1.7131e-10
		0.02774	-4.08569e-10	-1.15381e-10	-1.71322e-10
		0.02776	-4.08553e-10	-1.15401e-10	-1.71335e-10
		0.02778	-4.08536e-10	-1.15423e-10	-1.71351e-10
		0.0278	-4.08519e-10	-1.15446e-10	-1.71369e-10
		0.02782	-4.08502e-10	-1.15472e-10	-1.7139e-10
		0.02784	-4.08485e-10	-1.15499e-10	-1.71414e-10
		0.02786	-4.08468e-10	-1.15527e-10	-1.7144e-10
		0.02788	-4.0845e-10	-1.15558e-10	-1.71469e-10
		0.0279	-4.08432e-10	-1.1559e-10	-1.715e-10
		0.02792	-4.08414e-10	-1.15623e-10	-1.71534e-10
		0.02794	-4.08396e-10	-1.15658e-10	-1.7157e-10
		0.02796	-4.08378e-10	-1.15694e-10	-1.71609e-10
		0.02798	-4.0836e-10	-1.15732e-10	-1.7165e-10
		0.028	-4.08342e-10	-1.15772e-10	-1.71693e-10
		0.02802	-4.08325e-10	-1.15813e-10	-1.71737e-10
		0.02804	-4.08308e-10	-1.15855e-10	-1.71784e-10
		0.02806	-4.08291e-10	-1.15899e-10	-1.71832e-10
		0.02808	-4.08274e-10	-1.15944e-10	-1.71882e-10
		0.0281	-4.08258e-10	-1.1599e-10	-1.71932e-10
		0.02812	-4.08242e-10	-1.16036e-10	-1.71984e-10
		0.02814	-4.08227e-10	-1.16083e-10	-1.72036e-10
		0.02816	-4.08212e-10	-1.16131e-10	-1.72089e-10
		0.02818	-4.08199e-10	-1.16179e-10	-1.72141e-10
		0.0282	-4.08186e-10	-1.16227e-10	-1.72194e-10
		0.02822	-4.08175e-10	-1.16275e-10	-1.72245e-10
		0.02824	-4.08166e-10	-1.16322e-10	-1.72296e-10
		0.02826	-4.08157e-10	-1.16369e-10	-1.72346e-10
		0.02828	-4.08151e-10	-1.16415e-10	-1.72394e-10
		0.0283	-4.08145e-10	-1.1646e-10	-1.72441e-10
		0.02832	-4.08141e-10	-1.16504e-10	-1.72485e-10
		0.02834	-4.08139e-10	-1.16547e-10	-1.72527e-10
		0.02836	-4.08137e-10	-1.16588e-10	-1.72567e-10
		0.02838	-4.08136e-10	-1.16628e-10	-1.72604e-10
		0.0284	-4.08137e-10	-1.16666e-10	-1.72638e-10
		0.02842	-4.08137e-10	-1.16703e-10	-1.72669e-10
		0.02844	-4.08139e-10	-1.16737e-10	-1.72697e-10
		0.02846	-4.08141e-10	-1.1677e-10	-1.7272e-10
		0.02848	-4.08144e-10	-1.168e-10	-1.7274e-10
		0.0285	-4.08147e-10	-1.16829e-10	-1.72756e-10
		0.02852	-4.08152e-10	-1.16855e-10	-1.72768e-10
		0.02854	-4.08157e-10	-1.16879e-10	-1.72776e-10
		0.02856	-4.08163e-10	-1.169e-10	-1.72779e-10
		0.02858	-4.0817e-10	-1.16919e-10	-1.72778e-10
		0.0286	-4.08179e-10	-1.16936e-10	-1.72773e-10
		0.02862	-4.08188e-10	-1.1695e-10	-1.72762e-10
		0.02864	-4.08198e-10	-1.16961e-10	-1.72747e-10
		0.02866	-4.0821e-10	-1.1697e-10	-1.72727e-10
		0.02868	-4.08222e-10	-1.16976e-10	-1.72703e-10
		0.0287	-4.08235e-10	-1.1698e-10	-1.72674e-10
		0.02872	-4.08248e-10	-1.1698e-10	-1.72641e-10
		0.02874	-4.08262e-10	-1.16978e-10	-1.72604e-10
		0.02876	-4.08277e-10	-1.16974e-10	-1.72563e-10
		0.02878	-4.08292e-10	-1.16966e-10	-1.72519e-10
		0.0288	-4.08309e-10	-1.16956e-10	-1.72471e-10
		0.02882	-4.08325e-10	-1.16944e-10	-1.72421e-10
		0.02884	-4.08342e-10	-1.16928e-10	-1.72367e-10
		0.02886	-4.0836e-10	-1.1691e-10	-1.72312e-10
		0.02888	-4.08379e-10	-1.1689e-10	-1.72254e-10
		0.0289	-4.08398e-10	-1.16867e-10	-1.72194e-10
		0.02892	-4.08418e-10	-1.16842e-10	-1.72132e-10
		0.02894	-4.08439e-10	-1.16815e-10	-1.7207e-10
		0.02896	-4.08461e-10	-1.16787e-10	-1.72006e-10
		0.02898	-4.08484e-10	-1.16756e-10	-1.71941e-10
		0.029	-4.08507e-10	-1.16723e-10	-1.71876e-10
		0.02902	-4.08531e-10	-1.16689e-10	-1.71811e-10
		0.02904	-4.08556e-10	-1.16654e-10	-1.71746e-10
		0.02906	-4.08582e-10	-1.16617e-10	-1.71681e-10
		0.02908	-4.08608e-10	-1.16579e-10	-1.71617e-10
		0.0291	-4.08635e-10	-1.16541e-10	-1.71553e-10
		0.02912	-4.08662e-10	-1.16502e-10	-1.7149e-10
		0.02914	-4.08689e-10	-1.16462e-10	-1.71428e-10
		0.02916	-4.08717e-10	-1.16421e-10	-1.71368e-10
		0.02918	-4.08745e-10	-1.1638e-10	-1.71309e-10
		0.0292	-4.08773e-10	-1.16339e-10	-1.71253e-10
		0.02922	-4.08802e-10	-1.16298e-10	-1.71198e-10
		0.02924	-4.08831e-10	-1.16256e-10	-1.71145e-10
		0.02926	-4.08861e-10	-1.16215e-10	-1.71095e-10
		0.02928	-4.08892e-10	-1.16174e-10	-1.71048e-10
		0.0293	-4.08923e-10	-1.16133e-10	-1.71003e-10
		0.02932	-4.08954e-10	-1.16093e-10	-1.7096e-10
		0.02934	-4.08985e-10	-1.16053e-10	-1.70921e-10
		0.02936	-4.09017e-10	-1.16015e-10	-1.70885e-10
		0.02938	-4.09047e-10	-1.15977e-10	-1.70852e-10
		0.0294	-4.09077e-10	-1.15941e-10	-1.70822e-10
		0.02942	-4.09107e-10	-1.15906e-10	-1.70796e-10
		0.02944	-4.09136e-10	-1.15873e-10	-1.70773e-10
		0.02946	-4.09165e-10	-1.15842e-10	-1.70753e-10
		0.02948	-4.09193e-10	-1.15812e-10	-1.70737e-10
		0.0295	-4.0922e-10	-1.15783e-10	-1.70724e-10
		0.02952	-4.09247e-10	-1.15757e-10	-1.70715e-10
		0.02954	-4.09272e-10	-1.15732e-10	-1.70708e-10
		0.02956	-4.09297e-10	-1.1571e-10	-1.70705e-10
		0.02958	-4.0932e-10	-1.15689e-10	-1.70704e-10
		0.0296	-4.09343e-10	-1.15671e-10	-1.70706e-10
		0.02962	-4.09364e-10	-1.15654e-10	-1.70711e-10
		0.02964	-4.09384e-10	-1.1564e-10	-1.70718e-10
		0.02966	-4.09403e-10	-1.15628e-10	-1.70728e-10
		0.02968	-4.0942e-10	-1.15618e-10	-1.70739e-10
		0.0297	-4.09436e-10	-1.1561e-10	-1.70753e-10
		0.02972	-4.09451e-10	-1.15604e-10	-1.70768e-10
		0.02974	-4.09464e-10	-1.15601e-10	-1.70784e-10
		0.02976	-4.09475e-10	-1.15599e-10	-1.70802e-10
		0.02978	-4.09484e-10	-1.15599e-10	-1.70821e-10
		0.0298	-4.09491e-10	-1.15602e-10	-1.70842e-10
		0.02982	-4.09496e-10	-1.15606e-10	-1.70863e-10
		0.02984	-4.09499e-10	-1.15612e-10	-1.70886e-10
		0.02986	-4.095e-10	-1.1562e-10	-1.7091e-10
		0.02988	-4.095e-10	-1.15629e-10	-1.70935e-10
		0.0299	-4.09497e-10	-1.15639e-10	-1.70961e-10
		0.02992	-4.09493e-10	-1.1565e-10	-1.70988e-10
		0.02994	-4.09488e-10	-1.15662e-10	-1.71017e-10
		0.02996	-4.09481e-10	-1.15674e-10	-1.71046e-10
		0.02998	-4.09472e-10	-1.15687e-10	-1.71075e-10
		0.03	-4.09461e-10	-1.157e-10	-1.71106e-10
		0.03002	-4.09449e-10	-1.15713e-10	-1.71137e-10
		0.03004	-4.09434e-10	-1.15726e-10	-1.71168e-10
		0.03006	-4.09419e-10	-1.15739e-10	-1.71199e-10
		0.03008	-4.09401e-10	-1.15751e-10	-1.7123e-10
		0.0301	-4.09381e-10	-1.15763e-10	-1.71261e-10
		0.03012	-4.0936e-10	-1.15775e-10	-1.71292e-10
		0.03014	-4.09337e-10	-1.15786e-10	-1.71323e-10
		0.03016	-4.09312e-10	-1.15796e-10	-1.71353e-10
		0.03018	-4.09285e-10	-1.15806e-10	-1.71384e-10
		0.0302	-4.09257e-10	-1.15815e-10	-1.71414e-10
		0.03022	-4.09226e-10	-1.15824e-10	-1.71444e-10
		0.03024	-4.09194e-10	-1.15831e-10	-1.71473e-10
		0.03026	-4.0916e-10	-1.15838e-10	-1.71502e-10
		0.03028	-4.09124e-10	-1.15843e-10	-1.71531e-10
		0.0303	-4.09087e-10	-1.15848e-10	-1.71559e-10
		0.03032	-4.09049e-10	-1.15851e-10	-1.71587e-10
		0.03034	-4.0901e-10	-1.15853e-10	-1.71614e-10
		0.03036	-4.08971e-10	-1.15855e-10	-1.71642e-10
		0.03038	-4.08933e-10	-1.15854e-10	-1.71668e-10
		0.0304	-4.08895e-10	-1.15853e-10	-1.71694e-10
		0.03042	-4.08858e-10	-1.1585e-10	-1.7172e-10
		0.03044	-4.08823e-10	-1.15846e-10	-1.71746e-10
		0.03046	-4.08789e-10	-1.15841e-10	-1.7177e-10
		0.03048	-4.08756e-10	-1.15834e-10	-1.71795e-10
		0.0305	-4.08725e-10	-1.15825e-10	-1.71818e-10
		0.03052	-4.08695e-10	-1.15816e-10	-1.71842e-10
		0.03054	-4.08667e-10	-1.15804e-10	-1.71864e-10
		0.03056	-4.0864e-10	-1.15792e-10	-1.71886e-10
		0.03058	-4.08614e-10	-1.15778e-10	-1.71908e-10
		0.0306	-4.08589e-10	-1.15762e-10	-1.71929e-10
		0.03062	-4.08566e-10	-1.15746e-10	-1.7195e-10
		0.03064	-4.08543e-10	-1.15728e-10	-1.7197e-10
		0.03066	-4.08522e-10	-1.1571e-10	-1.7199e-10
		0.03068	-4.08501e-10	-1.15691e-10	-1.72009e-10
		0.0307	-4.08482e-10	-1.15671e-10	-1.72028e-10
		0.03072	-4.08464e-10	-1.1565e-10	-1.72047e-10
		0.03074	-4.08447e-10	-1.15629e-10	-1.72066e-10
		0.03076	-4.08432e-10	-1.15608e-10	-1.72086e-10
		0.03078	-4.08418e-10	-1.15587e-10	-1.72105e-10
		0.0308	-4.08405e-10	-1.15566e-10	-1.72125e-10
		0.03082	-4.08393e-10	-1.15545e-10	-1.72145e-10
		0.03084	-4.08382e-10	-1.15525e-10	-1.72167e-10
		0.03086	-4.08371e-10	-1.15505e-10	-1.72189e-10
		0.03088	-4.08362e-10	-1.15486e-10	-1.72213e-10
		0.0309	-4.08352e-10	-1.15467e-10	-1.72239e-10
		0.03092	-4.08343e-10	-1.1545e-10	-1.72266e-10
		0.03094	-4.08334e-10	-1.15433e-10	-1.72295e-10
		0.03096	-4.08325e-10	-1.15419e-10	-1.72326e-10
		0.03098	-4.08316e-10	-1.15405e-10	-1.72359e-10
		0.031	-4.08308e-10	-1.15393e-10	-1.72395e-10
		0.03102	-4.083e-10	-1.15382e-10	-1.72433e-10
		0.03104	-4.08292e-10	-1.15373e-10	-1.72474e-10
		0.03106	-4.08286e-10	-1.15366e-10	-1.72518e-10
		0.03108	-4.08279e-10	-1.1536e-10	-1.72564e-10
		0.0311	-4.08274e-10	-1.15356e-10	-1.72613e-10
		0.03112	-4.08269e-10	-1.15354e-10	-1.72665e-10
		0.03114	-4.08265e-10	-1.15354e-10	-1.7272e-10
		0.03116	-4.08261e-10	-1.15356e-10	-1.72777e-10
		0.03118	-4.08259e-10	-1.1536e-10	-1.72837e-10
		0.0312	-4.08256e-10	-1.15366e-10	-1.729e-10
		0.03122	-4.08254e-10	-1.15375e-10	-1.72965e-10
		0.03124	-4.08252e-10	-1.15385e-10	-1.73032e-10
		0.03126	-4.08249e-10	-1.15398e-10	-1.731e-10
		0.03128	-4.08246e-10	-1.15413e-10	-1.73171e-10
		0.0313	-4.08242e-10	-1.1543e-10	-1.73244e-10
		0.03132	-4.08238e-10	-1.15449e-10	-1.73318e-10
		0.03134	-4.08233e-10	-1.15471e-10	-1.73394e-10
		0.03136	-4.08226e-10	-1.15494e-10	-1.73472e-10
		0.03138	-4.0822e-10	-1.15519e-10	-1.7355e-10
		0.0314	-4.08212e-10	-1.15547e-10	-1.7363e-10
		0.03142	-4.08204e-10	-1.15575e-10	-1.73711e-10
		0.03144	-4.08195e-10	-1.15606e-10	-1.73792e-10
		0.03146	-4.08186e-10	-1.15638e-10	-1.73874e-10
		0.03148	-4.08177e-10	-1.15672e-10	-1.73956e-10
		0.0315	-4.08167e-10	-1.15707e-10	-1.74038e-10
		0.03152	-4.08157e-10	-1.15743e-10	-1.7412e-10
		0.03154	-4.08146e-10	-1.1578e-10	-1.74201e-10
		0.03156	-4.08135e-10	-1.15818e-10	-1.7428e-10
		0.03158	-4.08123e-10	-1.15857e-10	-1.74358e-10
		0.0316	-4.08111e-10	-1.15896e-10	-1.74435e-10
		0.03162	-4.08098e-10	-1.15935e-10	-1.74509e-10
		0.03164	-4.08085e-10	-1.15974e-10	-1.74581e-10
		0.03166	-4.0807e-10	-1.16013e-10	-1.7465e-10
		0.03168	-4.08056e-10	-1.16052e-10	-1.74717e-10
		0.0317	-4.0804e-10	-1.16089e-10	-1.7478e-10
		0.03172	-4.08025e-10	-1.16126e-10	-1.7484e-10
		0.03174	-4.08009e-10	-1.16163e-10	-1.74896e-10
		0.03176	-4.07994e-10	-1.16198e-10	-1.74948e-10
		0.03178	-4.07979e-10	-1.16231e-10	-1.74996e-10
		0.0318	-4.07965e-10	-1.16264e-10	-1.75039e-10
		0.03182	-4.07952e-10	-1.16296e-10	-1.75078e-10
		0.03184	-4.07939e-10	-1.16326e-10	-1.75113e-10
		0.03186	-4.07927e-10	-1.16355e-10	-1.75143e-10
		0.03188	-4.07915e-10	-1.16382e-10	-1.75168e-10
		0.0319	-4.07904e-10	-1.16409e-10	-1.75189e-10
		0.03192	-4.07893e-10	-1.16434e-10	-1.75206e-10
		0.03194	-4.07883e-10	-1.16458e-10	-1.75218e-10
		0.03196	-4.07872e-10	-1.16481e-10	-1.75226e-10
		0.03198	-4.07861e-10	-1.16502e-10	-1.7523e-10
		0.032	-4.07851e-10	-1.16523e-10	-1.7523e-10
		0.03202	-4.0784e-10	-1.16542e-10	-1.75227e-10
		0.03204	-4.07829e-10	-1.16561e-10	-1.75221e-10
		0.03206	-4.07818e-10	-1.16578e-10	-1.75212e-10
		0.03208	-4.07807e-10	-1.16594e-10	-1.752e-10
		0.0321	-4.07795e-10	-1.16608e-10	-1.75185e-10
		0.03212	-4.07784e-10	-1.16621e-10	-1.75168e-10
		0.03214	-4.07772e-10	-1.16633e-10	-1.75148e-10
		0.03216	-4.0776e-10	-1.16643e-10	-1.75126e-10
		0.03218	-4.07747e-10	-1.16651e-10	-1.75102e-10
		0.0322	-4.07734e-10	-1.16658e-10	-1.75075e-10
		0.03222	-4.07721e-10	-1.16663e-10	-1.75047e-10
		0.03224	-4.07708e-10	-1.16666e-10	-1.75016e-10
		0.03226	-4.07694e-10	-1.16667e-10	-1.74984e-10
		0.03228	-4.0768e-10	-1.16667e-10	-1.74951e-10
		0.0323	-4.07667e-10	-1.16665e-10	-1.74916e-10
		0.03232	-4.07653e-10	-1.16662e-10	-1.7488e-10
		0.03234	-4.0764e-10	-1.16657e-10	-1.74843e-10
		0.03236	-4.07628e-10	-1.16651e-10	-1.74805e-10
		0.03238	-4.07615e-10	-1.16643e-10	-1.74767e-10
		0.0324	-4.07603e-10	-1.16635e-10	-1.74728e-10
		0.03242	-4.07591e-10	-1.16626e-10	-1.74688e-10
		0.03244	-4.07579e-10	-1.16616e-10	-1.74649e-10
		0.03246	-4.07566e-10	-1.16605e-10	-1.7461e-10
		0.03248	-4.07554e-10	-1.16594e-10	-1.74571e-10
		0.0325	-4.07541e-10	-1.16583e-10	-1.74533e-10
		0.03252	-4.07527e-10	-1.16571e-10	-1.74496e-10
		0.03254	-4.07513e-10	-1.16558e-10	-1.74459e-10
		0.03256	-4.07498e-10	-1.16546e-10	-1.74424e-10
		0.03258	-4.07484e-10	-1.16534e-10	-1.7439e-10
		0.0326	-4.07469e-10	-1.16522e-10	-1.74356e-10
		0.03262	-4.07455e-10	-1.1651e-10	-1.74324e-10
		0.03264	-4.0744e-10	-1.16498e-10	-1.74293e-10
		0.03266	-4.07426e-10	-1.16486e-10	-1.74263e-10
		0.03268	-4.07413e-10	-1.16474e-10	-1.74234e-10
		0.0327	-4.07399e-10	-1.16463e-10	-1.74205e-10
		0.03272	-4.07385e-10	-1.16451e-10	-1.74177e-10
		0.03274	-4.07371e-10	-1.1644e-10	-1.74149e-10
		0.03276	-4.07356e-10	-1.1643e-10	-1.74121e-10
		0.03278	-4.07341e-10	-1.1642e-10	-1.74093e-10
		0.0328	-4.07325e-10	-1.1641e-10	-1.74065e-10
		0.03282	-4.07309e-10	-1.16401e-10	-1.74038e-10
		0.03284	-4.07291e-10	-1.16393e-10	-1.7401e-10
		0.03286	-4.07272e-10	-1.16386e-10	-1.73982e-10
		0.03288	-4.07253e-10	-1.16379e-10	-1.73953e-10
		0.0329	-4.07232e-10	-1.16374e-10	-1.73925e-10
		0.03292	-4.0721e-10	-1.16369e-10	-1.73896e-10
		0.03294	-4.07187e-10	-1.16366e-10	-1.73866e-10
		0.03296	-4.07164e-10	-1.16363e-10	-1.73837e-10
		0.03298	-4.07141e-10	-1.16362e-10	-1.73807e-10
		0.033	-4.07117e-10	-1.16361e-10	-1.73776e-10
		0.03302	-4.07092e-10	-1.16362e-10	-1.73746e-10
		0.03304	-4.07067e-10	-1.16364e-10	-1.73716e-10
		0.03306	-4.07041e-10	-1.16367e-10	-1.73686e-10
		0.03308	-4.07015e-10	-1.16372e-10	-1.73656e-10
		0.0331	-4.06988e-10	-1.16378e-10	-1.73626e-10
		0.03312	-4.06962e-10	-1.16386e-10	-1.73596e-10
		0.03314	-4.06935e-10	-1.16394e-10	-1.73567e-10
		0.03316	-4.06909e-10	-1.16404e-10	-1.73539e-10
		0.03318	-4.06883e-10	-1.16416e-10	-1.73511e-10
		0.0332	-4.06857e-10	-1.16428e-10	-1.73484e-10
		0.03322	-4.06831e-10	-1.16441e-10	-1.73457e-10
		0.03324	-4.06806e-10	-1.16456e-10	-1.73431e-10
		0.03326	-4.06782e-10	-1.16471e-10	-1.73405e-10
		0.03328	-4.06759e-10	-1.16487e-10	-1.73381e-10
		0.0333	-4.06736e-10	-1.16504e-10	-1.73357e-10
		0.03332	-4.06715e-10	-1.16521e-10	-1.73334e-10
		0.03334	-4.06695e-10	-1.16539e-10	-1.73312e-10
		0.03336	-4.06677e-10	-1.16558e-10	-1.7329e-10
		0.03338	-4.06661e-10	-1.16577e-10	-1.73269e-10
		0.0334	-4.06647e-10	-1.16596e-10	-1.7325e-10
		0.03342	-4.06635e-10	-1.16615e-10	-1.73231e-10
		0.03344	-4.06626e-10	-1.16635e-10	-1.73213e-10
		0.03346	-4.06619e-10	-1.16654e-10	-1.73196e-10
		0.03348	-4.06614e-10	-1.16673e-10	-1.7318e-10
		0.0335	-4.06612e-10	-1.16692e-10	-1.73165e-10
		0.03352	-4.06613e-10	-1.16711e-10	-1.73152e-10
		0.03354	-4.06616e-10	-1.16729e-10	-1.7314e-10
		0.03356	-4.06622e-10	-1.16747e-10	-1.73129e-10
		0.03358	-4.0663e-10	-1.16764e-10	-1.7312e-10
		0.0336	-4.06641e-10	-1.16781e-10	-1.73112e-10
		0.03362	-4.06654e-10	-1.16798e-10	-1.73106e-10
		0.03364	-4.0667e-10	-1.16814e-10	-1.731e-10
		0.03366	-4.06686e-10	-1.16829e-10	-1.73096e-10
		0.03368	-4.06705e-10	-1.16844e-10	-1.73093e-10
		0.0337	-4.06725e-10	-1.16858e-10	-1.73091e-10
		0.03372	-4.06745e-10	-1.16871e-10	-1.73091e-10
		0.03374	-4.06767e-10	-1.16883e-10	-1.73091e-10
		0.03376	-4.06788e-10	-1.16894e-10	-1.73093e-10
		0.03378	-4.0681e-10	-1.16905e-10	-1.73095e-10
		0.0338	-4.06832e-10	-1.16914e-10	-1.73098e-10
		0.03382	-4.06852e-10	-1.16922e-10	-1.73102e-10
		0.03384	-4.06873e-10	-1.16928e-10	-1.73106e-10
		0.03386	-4.06892e-10	-1.16934e-10	-1.7311e-10
		0.03388	-4.0691e-10	-1.16938e-10	-1.73115e-10
		0.0339	-4.06927e-10	-1.1694e-10	-1.7312e-10
		0.03392	-4.06943e-10	-1.16942e-10	-1.73126e-10
		0.03394	-4.06957e-10	-1.16942e-10	-1.73131e-10
		0.03396	-4.06971e-10	-1.16941e-10	-1.73136e-10
		0.03398	-4.06983e-10	-1.16939e-10	-1.73141e-10
		0.034	-4.06994e-10	-1.16936e-10	-1.73145e-10
		0.03402	-4.07004e-10	-1.16932e-10	-1.73149e-10
		0.03404	-4.07013e-10	-1.16926e-10	-1.73152e-10
		0.03406	-4.07021e-10	-1.16921e-10	-1.73153e-10
		0.03408	-4.07028e-10	-1.16914e-10	-1.73154e-10
		0.0341	-4.07034e-10	-1.16907e-10	-1.73154e-10
		0.03412	-4.07038e-10	-1.169e-10	-1.73152e-10
		0.03414	-4.07042e-10	-1.16892e-10	-1.7315e-10
		0.03416	-4.07044e-10	-1.16885e-10	-1.73147e-10
		0.03418	-4.07046e-10	-1.16877e-10	-1.73142e-10
		0.0342	-4.07046e-10	-1.1687e-10	-1.73137e-10
		0.03422	-4.07046e-10	-1.16863e-10	-1.73131e-10
		0.03424	-4.07045e-10	-1.16857e-10	-1.73124e-10
		0.03426	-4.07042e-10	-1.16851e-10	-1.73116e-10
		0.03428	-4.07037e-10	-1.16845e-10	-1.73107e-10
		0.0343	-4.07031e-10	-1.1684e-10	-1.73097e-10
		0.03432	-4.07022e-10	-1.16835e-10	-1.73087e-10
		0.03434	-4.07011e-10	-1.1683e-10	-1.73075e-10
		0.03436	-4.06997e-10	-1.16825e-10	-1.73063e-10
		0.03438	-4.06981e-10	-1.1682e-10	-1.7305e-10
		0.0344	-4.06963e-10	-1.16815e-10	-1.73036e-10
		0.03442	-4.06942e-10	-1.1681e-10	-1.73022e-10
		0.03444	-4.06919e-10	-1.16804e-10	-1.73007e-10
		0.03446	-4.06894e-10	-1.16798e-10	-1.72992e-10
		0.03448	-4.06868e-10	-1.16792e-10	-1.72977e-10
		0.0345	-4.0684e-10	-1.16785e-10	-1.72962e-10
		0.03452	-4.0681e-10	-1.16778e-10	-1.72947e-10
		0.03454	-4.0678e-10	-1.1677e-10	-1.72932e-10
		0.03456	-4.06749e-10	-1.16762e-10	-1.72918e-10
		0.03458	-4.06717e-10	-1.16753e-10	-1.72905e-10
		0.0346	-4.06684e-10	-1.16744e-10	-1.72894e-10
		0.03462	-4.06651e-10	-1.16734e-10	-1.72883e-10
		0.03464	-4.06618e-10	-1.16725e-10	-1.72874e-10
		0.03466	-4.06585e-10	-1.16714e-10	-1.72868e-10
		0.03468	-4.06552e-10	-1.16704e-10	-1.72863e-10
		0.0347	-4.06518e-10	-1.16693e-10	-1.72861e-10
		0.03472	-4.06486e-10	-1.16682e-10	-1.72862e-10
		0.03474	-4.06453e-10	-1.16671e-10	-1.72867e-10
		0.03476	-4.06422e-10	-1.1666e-10	-1.72874e-10
		0.03478	-4.06391e-10	-1.16649e-10	-1.72885e-10
		0.0348	-4.06363e-10	-1.16637e-10	-1.72899e-10
		0.03482	-4.06336e-10	-1.16626e-10	-1.72917e-10
		0.03484	-4.06312e-10	-1.16615e-10	-1.72938e-10
		0.03486	-4.0629e-10	-1.16605e-10	-1.72964e-10
		0.03488	-4.06272e-10	-1.16594e-10	-1.72993e-10
		0.0349	-4.06255e-10	-1.16584e-10	-1.73026e-10
		0.03492	-4.06241e-10	-1.16574e-10	-1.73063e-10
		0.03494	-4.06229e-10	-1.16564e-10	-1.73104e-10
		0.03496	-4.06219e-10	-1.16555e-10	-1.73149e-10
		0.03498	-4.06211e-10	-1.16547e-10	-1.73198e-10
		0.035	-4.06205e-10	-1.16538e-10	-1.7325e-10
		0.03502	-4.062e-10	-1.16531e-10	-1.73306e-10
		0.03504	-4.06198e-10	-1.16524e-10	-1.73365e-10
		0.03506	-4.06196e-10	-1.16517e-10	-1.73427e-10
		0.03508	-4.06196e-10	-1.16512e-10	-1.73491e-10
		0.0351	-4.06197e-10	-1.16507e-10	-1.73558e-10
		0.03512	-4.06198e-10	-1.16502e-10	-1.73628e-10
		0.03514	-4.062e-10	-1.16498e-10	-1.73699e-10
		0.03516	-4.06202e-10	-1.16495e-10	-1.73771e-10
		0.03518	-4.06203e-10	-1.16493e-10	-1.73845e-10
		0.0352	-4.06205e-10	-1.16492e-10	-1.7392e-10
		0.03522	-4.06207e-10	-1.16492e-10	-1.73996e-10
		0.03524	-4.06208e-10	-1.16492e-10	-1.74072e-10
		0.03526	-4.0621e-10	-1.16494e-10	-1.74148e-10
		0.03528	-4.06211e-10	-1.16497e-10	-1.74224e-10
		0.0353	-4.06213e-10	-1.165e-10	-1.74299e-10
		0.03532	-4.06214e-10	-1.16505e-10	-1.74373e-10
		0.03534	-4.06215e-10	-1.1651e-10	-1.74446e-10
		0.03536	-4.06215e-10	-1.16516e-10	-1.74517e-10
		0.03538	-4.06215e-10	-1.16523e-10	-1.74587e-10
		0.0354	-4.06215e-10	-1.1653e-10	-1.74654e-10
		0.03542	-4.06213e-10	-1.16538e-10	-1.74718e-10
		0.03544	-4.06211e-10	-1.16547e-10	-1.74779e-10
		0.03546	-4.06208e-10	-1.16557e-10	-1.74837e-10
		0.03548	-4.06204e-10	-1.16568e-10	-1.74892e-10
		0.0355	-4.06198e-10	-1.16579e-10	-1.74943e-10
		0.03552	-4.06192e-10	-1.1659e-10	-1.7499e-10
		0.03554	-4.06184e-10	-1.16602e-10	-1.75032e-10
		0.03556	-4.06175e-10	-1.16615e-10	-1.75071e-10
		0.03558	-4.06165e-10	-1.16628e-10	-1.75106e-10
		0.0356	-4.06154e-10	-1.16642e-10	-1.75136e-10
		0.03562	-4.06142e-10	-1.16656e-10	-1.75161e-10
		0.03564	-4.06129e-10	-1.16671e-10	-1.75182e-10
		0.03566	-4.06116e-10	-1.16685e-10	-1.75198e-10
		0.03568	-4.06102e-10	-1.167e-10	-1.75209e-10
		0.0357	-4.06087e-10	-1.16715e-10	-1.75216e-10
		0.03572	-4.06072e-10	-1.1673e-10	-1.75219e-10
		0.03574	-4.06057e-10	-1.16745e-10	-1.75217e-10
		0.03576	-4.06042e-10	-1.16759e-10	-1.75211e-10
		0.03578	-4.06027e-10	-1.16774e-10	-1.752e-10
		0.0358	-4.06012e-10	-1.16788e-10	-1.75187e-10
		0.03582	-4.05997e-10	-1.16803e-10	-1.75169e-10
		0.03584	-4.05983e-10	-1.16817e-10	-1.75149e-10
		0.03586	-4.0597e-10	-1.16831e-10	-1.75125e-10
		0.03588	-4.05956e-10	-1.16844e-10	-1.75099e-10
		0.0359	-4.05944e-10	-1.16858e-10	-1.75069e-10
		0.03592	-4.05933e-10	-1.16871e-10	-1.75038e-10
		0.03594	-4.05922e-10	-1.16884e-10	-1.75004e-10
		0.03596	-4.05912e-10	-1.16897e-10	-1.74969e-10
		0.03598	-4.05903e-10	-1.1691e-10	-1.74932e-10
		0.036	-4.05895e-10	-1.16923e-10	-1.74894e-10
		0.03602	-4.05888e-10	-1.16935e-10	-1.74855e-10
		0.03604	-4.05882e-10	-1.16947e-10	-1.74815e-10
		0.03606	-4.05876e-10	-1.16959e-10	-1.74776e-10
		0.03608	-4.05872e-10	-1.16971e-10	-1.74737e-10
		0.0361	-4.05867e-10	-1.16982e-10	-1.74698e-10
		0.03612	-4.05863e-10	-1.16992e-10	-1.7466e-10
		0.03614	-4.05859e-10	-1.17003e-10	-1.74623e-10
		0.03616	-4.05854e-10	-1.17012e-10	-1.74586e-10
		0.03618	-4.05848e-10	-1.17021e-10	-1.74552e-10
		0.0362	-4.05841e-10	-1.1703e-10	-1.74518e-10
		0.03622	-4.05833e-10	-1.17038e-10	-1.74486e-10
		0.03624	-4.05824e-10	-1.17045e-10	-1.74455e-10
		0.03626	-4.05814e-10	-1.17052e-10	-1.74427e-10
		0.03628	-4.05802e-10	-1.17058e-10	-1.74399e-10
		0.0363	-4.0579e-10	-1.17063e-10	-1.74373e-10
		0.03632	-4.05777e-10	-1.17068e-10	-1.74349e-10
		0.03634	-4.05764e-10	-1.17073e-10	-1.74326e-10
		0.03636	-4.05749e-10	-1.17076e-10	-1.74305e-10
		0.03638	-4.05735e-10	-1.1708e-10	-1.74285e-10
		0.0364	-4.05719e-10	-1.17082e-10	-1.74267e-10
		0.03642	-4.05702e-10	-1.17084e-10	-1.74249e-10
		0.03644	-4.05685e-10	-1.17086e-10	-1.74233e-10
		0.03646	-4.05668e-10	-1.17087e-10	-1.74218e-10
		0.03648	-4.05649e-10	-1.17088e-10	-1.74204e-10
		0.0365	-4.05631e-10	-1.17088e-10	-1.74192e-10
		0.03652	-4.05612e-10	-1.17088e-10	-1.74181e-10
		0.03654	-4.05593e-10	-1.17087e-10	-1.74171e-10
		0.03656	-4.05574e-10	-1.17086e-10	-1.74162e-10
		0.03658	-4.05554e-10	-1.17083e-10	-1.74154e-10
		0.0366	-4.05535e-10	-1.1708e-10	-1.74148e-10
		0.03662	-4.05515e-10	-1.17076e-10	-1.74142e-10
		0.03664	-4.05496e-10	-1.17071e-10	-1.74138e-10
		0.03666	-4.05477e-10	-1.17066e-10	-1.74135e-10
		0.03668	-4.05459e-10	-1.17059e-10	-1.74132e-10
		0.0367	-4.05441e-10	-1.17052e-10	-1.7413e-10
		0.03672	-4.05424e-10	-1.17044e-10	-1.74129e-10
		0.03674	-4.05408e-10	-1.17036e-10	-1.74128e-10
		0.03676	-4.05392e-10	-1.17026e-10	-1.74128e-10
		0.03678	-4.05376e-10	-1.17015e-10	-1.74128e-10
		0.0368	-4.05361e-10	-1.17004e-10	-1.74129e-10
		0.03682	-4.05346e-10	-1.16992e-10	-1.7413e-10
		0.03684	-4.05331e-10	-1.16979e-10	-1.74133e-10
		0.03686	-4.05317e-10	-1.16965e-10	-1.74136e-10
		0.03688	-4.05303e-10	-1.16951e-10	-1.7414e-10
		0.0369	-4.05291e-10	-1.16936e-10	-1.74145e-10
		0.03692	-4.0528e-10	-1.1692e-10	-1.74151e-10
		0.03694	-4.0527e-10	-1.16905e-10	-1.74158e-10
		0.03696	-4.05262e-10	-1.16889e-10	-1.74167e-10
		0.03698	-4.05256e-10	-1.16873e-10	-1.74176e-10
		0.037	-4.05252e-10	-1.16858e-10	-1.74187e-10
		0.03702	-4.0525e-10	-1.16842e-10	-1.74199e-10
		0.03704	-4.0525e-10	-1.16827e-10	-1.74212e-10
		0.03706	-4.05253e-10	-1.16811e-10	-1.74226e-10
		0.03708	-4.05259e-10	-1.16797e-10	-1.74242e-10
		0.0371	-4.05267e-10	-1.16783e-10	-1.7426e-10
		0.03712	-4.05278e-10	-1.16769e-10	-1.74278e-10
		0.03714	-4.05292e-10	-1.16756e-10	-1.74298e-10
		0.03716	-4.05308e-10	-1.16745e-10	-1.7432e-10
		0.03718	-4.05328e-10	-1.16734e-10	-1.74342e-10
		0.0372	-4.0535e-10	-1.16725e-10	-1.74366e-10
		0.03722	-4.05375e-10	-1.16717e-10	-1.7439e-10
		0.03724	-4.05403e-10	-1.16711e-10	-1.74416e-10
		0.03726	-4.05434e-10	-1.16706e-10	-1.74442e-10
		0.03728	-4.05468e-10	-1.16704e-10	-1.74469e-10
		0.0373	-4.05505e-10	-1.16703e-10	-1.74497e-10
		0.03732	-4.05545e-10	-1.16705e-10	-1.74524e-10
		0.03734	-4.05587e-10	-1.16708e-10	-1.74552e-10
		0.03736	-4.05631e-10	-1.16714e-10	-1.7458e-10
		0.03738	-4.05677e-10	-1.16721e-10	-1.74608e-10
		0.0374	-4.05724e-10	-1.16731e-10	-1.74636e-10
		0.03742	-4.05772e-10	-1.16743e-10	-1.74663e-10
		0.03744	-4.05821e-10	-1.16758e-10	-1.74689e-10
		0.03746	-4.05871e-10	-1.16774e-10	-1.74713e-10
		0.03748	-4.0592e-10	-1.16792e-10	-1.74737e-10
		0.0375	-4.05969e-10	-1.16811e-10	-1.74759e-10
		0.03752	-4.06018e-10	-1.16832e-10	-1.7478e-10
		0.03754	-4.06067e-10	-1.16855e-10	-1.74798e-10
		0.03756	-4.06114e-10	-1.16879e-10	-1.74814e-10
		0.03758	-4.06161e-10	-1.16904e-10	-1.74828e-10
		0.0376	-4.06207e-10	-1.1693e-10	-1.74839e-10
		0.03762	-4.06252e-10	-1.16957e-10	-1.74848e-10
		0.03764	-4.06296e-10	-1.16985e-10	-1.74854e-10
		0.03766	-4.06339e-10	-1.17014e-10	-1.74857e-10
		0.03768	-4.0638e-10	-1.17044e-10	-1.74858e-10
		0.0377	-4.06419e-10	-1.17074e-10	-1.74855e-10
		0.03772	-4.06456e-10	-1.17105e-10	-1.74849e-10
		0.03774	-4.0649e-10	-1.17137e-10	-1.7484e-10
		0.03776	-4.06522e-10	-1.17168e-10	-1.74828e-10
		0.03778	-4.06551e-10	-1.172e-10	-1.74812e-10
		0.0378	-4.06577e-10	-1.17232e-10	-1.74793e-10
		0.03782	-4.066e-10	-1.17264e-10	-1.74771e-10
		0.03784	-4.06619e-10	-1.17295e-10	-1.74745e-10
		0.03786	-4.06635e-10	-1.17326e-10	-1.74716e-10
		0.03788	-4.06648e-10	-1.17355e-10	-1.74685e-10
		0.0379	-4.06657e-10	-1.17384e-10	-1.7465e-10
		0.03792	-4.06662e-10	-1.17412e-10	-1.74614e-10
		0.03794	-4.06664e-10	-1.17439e-10	-1.74575e-10
		0.03796	-4.06662e-10	-1.17465e-10	-1.74534e-10
		0.03798	-4.06656e-10	-1.17489e-10	-1.74491e-10
		0.038	-4.06647e-10	-1.17512e-10	-1.74446e-10
		0.03802	-4.06634e-10	-1.17533e-10	-1.744e-10
		0.03804	-4.06617e-10	-1.17553e-10	-1.74353e-10
		0.03806	-4.06597e-10	-1.17571e-10	-1.74305e-10
		0.03808	-4.06574e-10	-1.17588e-10	-1.74257e-10
		0.0381	-4.06548e-10	-1.17603e-10	-1.74209e-10
		0.03812	-4.06519e-10	-1.17617e-10	-1.74161e-10
		0.03814	-4.06489e-10	-1.17629e-10	-1.74113e-10
		0.03816	-4.06456e-10	-1.17639e-10	-1.74067e-10
		0.03818	-4.06422e-10	-1.17647e-10	-1.74022e-10
		0.0382	-4.06387e-10	-1.17654e-10	-1.73979e-10
		0.03822	-4.0635e-10	-1.17659e-10	-1.73937e-10
		0.03824	-4.06314e-10	-1.17663e-10	-1.73898e-10
		0.03826	-4.06276e-10	-1.17664e-10	-1.73862e-10
		0.03828	-4.06239e-10	-1.17664e-10	-1.73828e-10
		0.0383	-4.062e-10	-1.17663e-10	-1.73799e-10
		0.03832	-4.06161e-10	-1.1766e-10	-1.73772e-10
		0.03834	-4.06121e-10	-1.17655e-10	-1.7375e-10
		0.03836	-4.0608e-10	-1.1765e-10	-1.73732e-10
		0.03838	-4.06038e-10	-1.17643e-10	-1.73719e-10
		0.0384	-4.05996e-10	-1.17636e-10	-1.73709e-10
		0.03842	-4.05954e-10	-1.17628e-10	-1.73704e-10
		0.03844	-4.05911e-10	-1.17619e-10	-1.73704e-10
		0.03846	-4.05869e-10	-1.1761e-10	-1.73708e-10
		0.03848	-4.05828e-10	-1.176e-10	-1.73716e-10
		0.0385	-4.05787e-10	-1.1759e-10	-1.73727e-10
		0.03852	-4.05747e-10	-1.1758e-10	-1.73743e-10
		0.03854	-4.05707e-10	-1.17571e-10	-1.73762e-10
		0.03856	-4.0567e-10	-1.17561e-10	-1.73784e-10
		0.03858	-4.05633e-10	-1.17552e-10	-1.73808e-10
		0.0386	-4.05598e-10	-1.17543e-10	-1.73836e-10
		0.03862	-4.05564e-10	-1.17535e-10	-1.73866e-10
		0.03864	-4.05532e-10	-1.17528e-10	-1.73898e-10
		0.03866	-4.05501e-10	-1.17521e-10	-1.73931e-10
		0.03868	-4.05472e-10	-1.17516e-10	-1.73967e-10
		0.0387	-4.05446e-10	-1.17512e-10	-1.74004e-10
		0.03872	-4.05421e-10	-1.17509e-10	-1.74041e-10
		0.03874	-4.05399e-10	-1.17507e-10	-1.7408e-10
		0.03876	-4.05379e-10	-1.17507e-10	-1.74119e-10
		0.03878	-4.05362e-10	-1.17509e-10	-1.74157e-10
		0.0388	-4.05346e-10	-1.17513e-10	-1.74195e-10
		0.03882	-4.05334e-10	-1.17518e-10	-1.74233e-10
		0.03884	-4.05323e-10	-1.17525e-10	-1.74269e-10
		0.03886	-4.05315e-10	-1.17533e-10	-1.74304e-10
		0.03888	-4.05309e-10	-1.17544e-10	-1.74338e-10
		0.0389	-4.05305e-10	-1.17556e-10	-1.74369e-10
		0.03892	-4.05303e-10	-1.17571e-10	-1.74398e-10
		0.03894	-4.05304e-10	-1.17587e-10	-1.74425e-10
		0.03896	-4.05306e-10	-1.17605e-10	-1.74449e-10
		0.03898	-4.0531e-10	-1.17624e-10	-1.7447e-10
		0.039	-4.05316e-10	-1.17646e-10	-1.74488e-10
		0.03902	-4.05324e-10	-1.1767e-10	-1.74504e-10
		0.03904	-4.05333e-10	-1.17695e-10	-1.74516e-10
		0.03906	-4.05343e-10	-1.17722e-10	-1.74525e-10
		0.03908	-4.05355e-10	-1.17751e-10	-1.74531e-10
		0.0391	-4.05367e-10	-1.17782e-10	-1.74534e-10
		0.03912	-4.05381e-10	-1.17814e-10	-1.74534e-10
		0.03914	-4.05396e-10	-1.17848e-10	-1.74531e-10
		0.03916	-4.05412e-10	-1.17883e-10	-1.74525e-10
		0.03918	-4.05428e-10	-1.1792e-10	-1.74516e-10
		0.0392	-4.05445e-10	-1.17957e-10	-1.74506e-10
		0.03922	-4.05463e-10	-1.17995e-10	-1.74493e-10
		0.03924	-4.05481e-10	-1.18035e-10	-1.74478e-10
		0.03926	-4.05498e-10	-1.18075e-10	-1.74461e-10
		0.03928	-4.05516e-10	-1.18115e-10	-1.74443e-10
		0.0393	-4.05533e-10	-1.18157e-10	-1.74423e-10
		0.03932	-4.0555e-10	-1.18199e-10	-1.74402e-10
		0.03934	-4.05567e-10	-1.18242e-10	-1.7438e-10
		0.03936	-4.05584e-10	-1.18286e-10	-1.74357e-10
		0.03938	-4.05602e-10	-1.1833e-10	-1.74333e-10
		0.0394	-4.05619e-10	-1.18376e-10	-1.74309e-10
		0.03942	-4.05636e-10	-1.18422e-10	-1.74285e-10
		0.03944	-4.05653e-10	-1.18469e-10	-1.74261e-10
		0.03946	-4.0567e-10	-1.18517e-10	-1.74238e-10
		0.03948	-4.05686e-10	-1.18565e-10	-1.74215e-10
		0.0395	-4.05701e-10	-1.18613e-10	-1.74194e-10
		0.03952	-4.05715e-10	-1.18663e-10	-1.74174e-10
		0.03954	-4.05728e-10	-1.18712e-10	-1.74155e-10
		0.03956	-4.0574e-10	-1.18761e-10	-1.74138e-10
		0.03958	-4.05751e-10	-1.18811e-10	-1.74124e-10
		0.0396	-4.0576e-10	-1.1886e-10	-1.74111e-10
		0.03962	-4.05767e-10	-1.18908e-10	-1.74101e-10
		0.03964	-4.05773e-10	-1.18955e-10	-1.74093e-10
		0.03966	-4.05778e-10	-1.19002e-10	-1.74088e-10
		0.03968	-4.05781e-10	-1.19046e-10	-1.74085e-10
		0.0397	-4.05783e-10	-1.19089e-10	-1.74085e-10
		0.03972	-4.05783e-10	-1.1913e-10	-1.74088e-10
		0.03974	-4.05782e-10	-1.19169e-10	-1.74094e-10
		0.03976	-4.0578e-10	-1.19206e-10	-1.74102e-10
		0.03978	-4.05777e-10	-1.1924e-10	-1.74114e-10
		0.0398	-4.05773e-10	-1.19272e-10	-1.74128e-10
		0.03982	-4.05769e-10	-1.19301e-10	-1.74145e-10
		0.03984	-4.05763e-10	-1.19328e-10	-1.74165e-10
		0.03986	-4.05757e-10	-1.19352e-10	-1.74187e-10
		0.03988	-4.0575e-10	-1.19373e-10	-1.74212e-10
		0.0399	-4.05744e-10	-1.19391e-10	-1.7424e-10
		0.03992	-4.05738e-10	-1.19407e-10	-1.7427e-10
[truncated: 73,303 more rows]
