# Supplementary material for: Physiological roles of endocytosis and presynaptic scaffold in vesicle replenishment at fast and slow central synapses
Source: eLife. 2024 Jun 3;12:RP90497. doi: 10.7554/eLife.90497 (PMC11147502; doi:10.7554/eLife.90497)
Supplement: Figure 6—source data 1. [file elife-90497-fig6-data1.xlsx]

## Sheet: 10 Hz data, Fig 6A, C
		Figure 6A_sample EPSC traces					Figure 6A_normalized EPSC amplitude vs stimulation (#)								Figure 6A_average facilitation at EPSCs (#26-30)						Figure 6C_sample EPSC traces					Figure 6C_normalized EPSC amplitude vs stimulation (#)								Figure 6C_average facilitation at EPSCs (#26-30)
		Time (s)	Control	Dynasore	Pitstop-2		Stimulation (#)	Control		Dynasore		Pitstop-2				Control	Dynasore	Pitstop-2			Time (s)	Control	ML141	Latrunculin-B		Stimulation (#)	Control		ML141		Latrunculin-B				Control	ML141	Latrunculin-B
								Mean	SEM	Mean	SEM	Mean	SEM		Mean	1.85	0.83	1.21									Mean	SEM	Mean	SEM	Mean	SEM		Mean	1.85	2.03	1.84
		0	-1.70889e-10	-9.89765e-11	-1.24693e-10		1	1	0	1	0	1	0		SEM	0.17	0.07	0.08			0	-1.70889e-10	-1.45876e-10	-7.11283e-11		1	1	0	1	0	1	0		SEM	0.17	0.16	0.1
		2e-05	-1.7089e-10	-9.89762e-11	-1.24693e-10		2	1.66204	0.114833	1.6156	0.174693	1.83143	0.155871		n number	17	10	14			2e-05	-1.7089e-10	-1.45877e-10	-7.11282e-11		2	1.66204	0.114833	2.02809	0.143525	2.12084	0.124523		n number	17	10	12
		4e-05	-1.70893e-10	-9.89755e-11	-1.24692e-10		3	1.9477	0.12172	1.67002	0.13011	1.94495	0.154119		p-value	vs Control	1.3e-05	0.003			4e-05	-1.70893e-10	-1.45879e-10	-7.11278e-11		3	1.9477	0.12172	2.72907	0.240818	2.26635	0.163591		p-value	--	0.5	0.96
		6e-05	-1.70898e-10	-9.89742e-11	-1.24691e-10		4	2.09251	0.185418	1.56718	0.150157	2.03578	0.117479		p-value	--	vs Dynasore	0.003			6e-05	-1.70898e-10	-1.45883e-10	-7.11273e-11		4	2.09251	0.185418	2.4981	0.256188	2.32184	0.226327
		8e-05	-1.70904e-10	-9.89724e-11	-1.24689e-10		5	2.18297	0.198456	1.52402	0.104442	1.93605	0.122558								8e-05	-1.70904e-10	-1.45888e-10	-7.11267e-11		5	2.18297	0.198456	2.76352	0.352735	2.40112	0.16034
		0.0001	-1.70913e-10	-9.89701e-11	-1.24687e-10		6	2.31873	0.226483	1.52812	0.0969019	2.00344	0.166735								0.0001	-1.70913e-10	-1.45896e-10	-7.11262e-11		6	2.31873	0.226483	2.53902	0.324843	2.56342	0.277728
		0.00012	-1.70924e-10	-9.89674e-11	-1.24684e-10		7	2.34223	0.294334	1.43543	0.154354	1.84587	0.135051								0.00012	-1.70924e-10	-1.45904e-10	-7.11258e-11		7	2.34223	0.294334	2.45846	0.22132	2.31014	0.225015
		0.00014	-1.70937e-10	-9.89646e-11	-1.24681e-10		8	2.31832	0.173297	1.37643	0.127093	2.0618	0.105814								0.00014	-1.70937e-10	-1.45915e-10	-7.11258e-11		8	2.31832	0.173297	2.67288	0.168627	2.58948	0.194096
		0.00016	-1.70952e-10	-9.89616e-11	-1.24678e-10		9	2.18011	0.209377	1.28905	0.122849	1.91436	0.129445								0.00016	-1.70952e-10	-1.45927e-10	-7.11261e-11		9	2.18011	0.209377	2.57394	0.25352	2.34289	0.183991
		0.00018	-1.70969e-10	-9.89587e-11	-1.24674e-10		10	2.18214	0.180379	1.18354	0.124623	2.06405	0.16477								0.00018	-1.70969e-10	-1.45941e-10	-7.1127e-11		10	2.18214	0.180379	2.66626	0.258446	2.34356	0.197947
		0.0002	-1.70988e-10	-9.8956e-11	-1.2467e-10		11	2.01945	0.176765	1.01566	0.0772922	2.00168	0.131756								0.0002	-1.70988e-10	-1.45956e-10	-7.11286e-11		11	2.01945	0.176765	2.33877	0.170228	2.343	0.180612
		0.00022	-1.71009e-10	-9.89536e-11	-1.24667e-10		12	2.26197	0.250741	1.13912	0.127908	1.83745	0.127099								0.00022	-1.71009e-10	-1.45974e-10	-7.11308e-11		12	2.26197	0.250741	2.59463	0.200163	2.569	0.316785
		0.00024	-1.71033e-10	-9.89517e-11	-1.24663e-10		13	2.19677	0.244547	1.20078	0.165112	1.8377	0.134171								0.00024	-1.71033e-10	-1.45993e-10	-7.1134e-11		13	2.19677	0.244547	2.49894	0.17402	2.18037	0.205178
		0.00026	-1.71058e-10	-9.89503e-11	-1.24659e-10		14	2.15335	0.187523	1.08101	0.108901	1.72543	0.12194								0.00026	-1.71058e-10	-1.46014e-10	-7.11382e-11		14	2.15335	0.187523	2.32083	0.184401	2.40542	0.21994
		0.00028	-1.71086e-10	-9.89494e-11	-1.24655e-10		15	1.89168	0.171376	1.02108	0.13501	1.87391	0.105469								0.00028	-1.71086e-10	-1.46037e-10	-7.11436e-11		15	1.89168	0.171376	2.30494	0.183529	2.30233	0.217827
		0.0003	-1.71115e-10	-9.8949e-11	-1.24652e-10		16	1.97877	0.211356	1.0225	0.128014	1.78457	0.0966679								0.0003	-1.71115e-10	-1.46062e-10	-7.11502e-11		16	1.97877	0.211356	2.78925	0.234146	1.95298	0.100593
		0.00032	-1.71145e-10	-9.89491e-11	-1.24648e-10		17	1.88853	0.225363	1.05619	0.105937	1.76401	0.142863								0.00032	-1.71145e-10	-1.46088e-10	-7.11583e-11		17	1.88853	0.225363	2.47634	0.213572	2.14485	0.15874
		0.00034	-1.71177e-10	-9.89496e-11	-1.24645e-10		18	2.04581	0.167142	0.921467	0.105558	1.67558	0.0990691								0.00034	-1.71177e-10	-1.46116e-10	-7.11679e-11		18	2.04581	0.167142	2.18166	0.207429	2.11325	0.21427
		0.00036	-1.7121e-10	-9.89505e-11	-1.24642e-10		19	2.00867	0.184585	0.855577	0.0923723	1.52947	0.129494								0.00036	-1.7121e-10	-1.46144e-10	-7.11792e-11		19	2.00867	0.184585	2.37309	0.176161	2.09291	0.23632
		0.00038	-1.71243e-10	-9.89516e-11	-1.24639e-10		20	1.98133	0.189885	0.870584	0.0722821	1.48905	0.140745								0.00038	-1.71243e-10	-1.46174e-10	-7.11922e-11		20	1.98133	0.189885	2.33951	0.217621	2.13921	0.119431
		0.0004	-1.71277e-10	-9.89529e-11	-1.24637e-10		21	1.88891	0.147771	1.0179	0.101466	1.525	0.136168								0.0004	-1.71277e-10	-1.46206e-10	-7.1207e-11		21	1.88891	0.147771	2.09564	0.170077	2.11175	0.131535
		0.00042	-1.71312e-10	-9.89542e-11	-1.24635e-10		22	1.93072	0.194062	0.92134	0.106361	1.34609	0.122835								0.00042	-1.71312e-10	-1.46238e-10	-7.12234e-11		22	1.93072	0.194062	2.22119	0.233103	1.92423	0.125851
		0.00044	-1.71347e-10	-9.89555e-11	-1.24633e-10		23	1.97201	0.191418	0.82951	0.10012	1.51824	0.118753								0.00044	-1.71347e-10	-1.46271e-10	-7.12417e-11		23	1.97201	0.191418	2.28983	0.170424	1.89768	0.133543
		0.00046	-1.71383e-10	-9.89567e-11	-1.24632e-10		24	1.92225	0.201182	0.830713	0.0900343	1.37526	0.0953836								0.00046	-1.71383e-10	-1.46305e-10	-7.12615e-11		24	1.92225	0.201182	1.91536	0.100224	1.8877	0.180393
		0.00048	-1.71419e-10	-9.89575e-11	-1.2463e-10		25	2.04691	0.237657	0.827934	0.0772185	1.15445	0.0944557								0.00048	-1.71419e-10	-1.46339e-10	-7.12829e-11		25	2.04691	0.237657	2.04859	0.181963	1.91601	0.136343
		0.0005	-1.71455e-10	-9.8958e-11	-1.24629e-10		26	2.02986	0.178855	0.800702	0.091079	1.20088	0.0999393								0.0005	-1.71455e-10	-1.46375e-10	-7.13056e-11		26	2.02986	0.178855	2.11091	0.157483	1.84868	0.136711
		0.00052	-1.71491e-10	-9.89581e-11	-1.24627e-10		27	1.95517	0.205279	0.815452	0.0906821	1.1982	0.114629								0.00052	-1.71491e-10	-1.46411e-10	-7.13297e-11		27	1.95517	0.205279	2.02393	0.186059	1.87452	0.192679
		0.00054	-1.71527e-10	-9.89577e-11	-1.24625e-10		28	1.79435	0.20259	0.838049	0.108068	1.30585	0.0954708								0.00054	-1.71527e-10	-1.46448e-10	-7.13548e-11		28	1.79435	0.20259	1.87005	0.177331	1.95062	0.155093
		0.00056	-1.71562e-10	-9.89569e-11	-1.24623e-10		29	1.75027	0.159555	0.842795	0.062793	1.11608	0.103082								0.00056	-1.71562e-10	-1.46485e-10	-7.13808e-11		29	1.75027	0.159555	2.052	0.196338	1.76099	0.116584
		0.00058	-1.71597e-10	-9.89556e-11	-1.24621e-10		30	1.71959	0.157415	0.868994	0.0425425	1.22122	0.110695								0.00058	-1.71597e-10	-1.46523e-10	-7.14075e-11		30	1.71959	0.157415	2.09817	0.190075	1.76106	0.0916311
		0.0006	-1.7163e-10	-9.89539e-11	-1.24619e-10																0.0006	-1.7163e-10	-1.46561e-10	-7.14348e-11
		0.00062	-1.71663e-10	-9.89518e-11	-1.24616e-10																0.00062	-1.71663e-10	-1.466e-10	-7.14625e-11
		0.00064	-1.71695e-10	-9.89493e-11	-1.24613e-10																0.00064	-1.71695e-10	-1.46638e-10	-7.14905e-11
		0.00066	-1.71726e-10	-9.89466e-11	-1.2461e-10																0.00066	-1.71726e-10	-1.46676e-10	-7.15186e-11
		0.00068	-1.71755e-10	-9.89437e-11	-1.24608e-10																0.00068	-1.71755e-10	-1.46714e-10	-7.15468e-11
		0.0007	-1.71782e-10	-9.89405e-11	-1.24605e-10																0.0007	-1.71782e-10	-1.46752e-10	-7.15749e-11
		0.00072	-1.71808e-10	-9.89371e-11	-1.24603e-10																0.00072	-1.71808e-10	-1.46789e-10	-7.16026e-11
		0.00074	-1.71833e-10	-9.89335e-11	-1.24601e-10																0.00074	-1.71833e-10	-1.46825e-10	-7.16298e-11
		0.00076	-1.71856e-10	-9.89298e-11	-1.24599e-10																0.00076	-1.71856e-10	-1.46861e-10	-7.16563e-11
		0.00078	-1.71877e-10	-9.89259e-11	-1.24597e-10																0.00078	-1.71877e-10	-1.46895e-10	-7.1682e-11
		0.0008	-1.71896e-10	-9.89216e-11	-1.24595e-10																0.0008	-1.71896e-10	-1.46929e-10	-7.17065e-11
		0.00082	-1.71914e-10	-9.8917e-11	-1.24593e-10																0.00082	-1.71914e-10	-1.46962e-10	-7.17297e-11
		0.00084	-1.71931e-10	-9.89119e-11	-1.24591e-10																0.00084	-1.71931e-10	-1.46994e-10	-7.17517e-11
		0.00086	-1.71946e-10	-9.89064e-11	-1.2459e-10																0.00086	-1.71946e-10	-1.47025e-10	-7.17724e-11
		0.00088	-1.7196e-10	-9.89004e-11	-1.24588e-10																0.00088	-1.7196e-10	-1.47054e-10	-7.17916e-11
		0.0009	-1.71973e-10	-9.88938e-11	-1.24587e-10																0.0009	-1.71973e-10	-1.47081e-10	-7.18095e-11
		0.00092	-1.71986e-10	-9.88867e-11	-1.24587e-10																0.00092	-1.71986e-10	-1.47107e-10	-7.18261e-11
		0.00094	-1.71999e-10	-9.88789e-11	-1.24586e-10																0.00094	-1.71999e-10	-1.47131e-10	-7.18414e-11
		0.00096	-1.72011e-10	-9.88705e-11	-1.24586e-10																0.00096	-1.72011e-10	-1.47154e-10	-7.18556e-11
		0.00098	-1.72024e-10	-9.88614e-11	-1.24585e-10																0.00098	-1.72024e-10	-1.47175e-10	-7.18688e-11
		0.001	-1.72036e-10	-9.88518e-11	-1.24585e-10																0.001	-1.72036e-10	-1.47194e-10	-7.1881e-11
		0.00102	-1.72049e-10	-9.88415e-11	-1.24584e-10																0.00102	-1.72049e-10	-1.47211e-10	-7.18923e-11
		0.00104	-1.72062e-10	-9.88309e-11	-1.24582e-10																0.00104	-1.72062e-10	-1.47226e-10	-7.19027e-11
		0.00106	-1.72074e-10	-9.88196e-11	-1.2458e-10																0.00106	-1.72074e-10	-1.47239e-10	-7.19121e-11
		0.00108	-1.72087e-10	-9.88078e-11	-1.24577e-10																0.00108	-1.72087e-10	-1.4725e-10	-7.19207e-11
		0.0011	-1.72101e-10	-9.87953e-11	-1.24573e-10																0.0011	-1.72101e-10	-1.47258e-10	-7.19284e-11
		0.00112	-1.72115e-10	-9.87818e-11	-1.24569e-10																0.00112	-1.72115e-10	-1.47264e-10	-7.19352e-11
		0.00114	-1.72129e-10	-9.87675e-11	-1.24564e-10																0.00114	-1.72129e-10	-1.47268e-10	-7.19411e-11
		0.00116	-1.72144e-10	-9.87522e-11	-1.24558e-10																0.00116	-1.72144e-10	-1.47269e-10	-7.1946e-11
		0.00118	-1.72159e-10	-9.87359e-11	-1.24551e-10																0.00118	-1.72159e-10	-1.47268e-10	-7.19498e-11
		0.0012	-1.72176e-10	-9.87185e-11	-1.24543e-10																0.0012	-1.72176e-10	-1.47265e-10	-7.19525e-11
		0.00122	-1.72193e-10	-9.87e-11	-1.24535e-10																0.00122	-1.72193e-10	-1.47259e-10	-7.19542e-11
		0.00124	-1.7221e-10	-9.86806e-11	-1.24526e-10																0.00124	-1.7221e-10	-1.4725e-10	-7.19548e-11
		0.00126	-1.72228e-10	-9.86601e-11	-1.24517e-10																0.00126	-1.72228e-10	-1.4724e-10	-7.19542e-11
		0.00128	-1.72247e-10	-9.86385e-11	-1.24508e-10																0.00128	-1.72247e-10	-1.47227e-10	-7.19526e-11
		0.0013	-1.72266e-10	-9.86158e-11	-1.24499e-10																0.0013	-1.72266e-10	-1.47213e-10	-7.19499e-11
		0.00132	-1.72286e-10	-9.8592e-11	-1.2449e-10																0.00132	-1.72286e-10	-1.47196e-10	-7.19463e-11
		0.00134	-1.72307e-10	-9.85672e-11	-1.24482e-10																0.00134	-1.72307e-10	-1.47178e-10	-7.19417e-11
		0.00136	-1.72328e-10	-9.85414e-11	-1.24475e-10																0.00136	-1.72328e-10	-1.47157e-10	-7.19363e-11
		0.00138	-1.72349e-10	-9.85148e-11	-1.24468e-10																0.00138	-1.72349e-10	-1.47136e-10	-7.19301e-11
		0.0014	-1.72371e-10	-9.84874e-11	-1.24462e-10																0.0014	-1.72371e-10	-1.47113e-10	-7.19232e-11
		0.00142	-1.72394e-10	-9.84597e-11	-1.24458e-10																0.00142	-1.72394e-10	-1.47089e-10	-7.19156e-11
		0.00144	-1.72417e-10	-9.84314e-11	-1.24454e-10																0.00144	-1.72417e-10	-1.47064e-10	-7.19074e-11
		0.00146	-1.7244e-10	-9.84028e-11	-1.24452e-10																0.00146	-1.7244e-10	-1.47039e-10	-7.18986e-11
		0.00148	-1.72464e-10	-9.8374e-11	-1.2445e-10																0.00148	-1.72464e-10	-1.47012e-10	-7.18894e-11
		0.0015	-1.72488e-10	-9.83447e-11	-1.2445e-10																0.0015	-1.72488e-10	-1.46985e-10	-7.18798e-11
		0.00152	-1.72513e-10	-9.83151e-11	-1.2445e-10																0.00152	-1.72513e-10	-1.46957e-10	-7.18698e-11
		0.00154	-1.72538e-10	-9.82851e-11	-1.24452e-10																0.00154	-1.72538e-10	-1.46928e-10	-7.18595e-11
		0.00156	-1.72564e-10	-9.82546e-11	-1.24454e-10																0.00156	-1.72564e-10	-1.46899e-10	-7.1849e-11
		0.00158	-1.72589e-10	-9.82236e-11	-1.24457e-10																0.00158	-1.72589e-10	-1.4687e-10	-7.18383e-11
		0.0016	-1.72616e-10	-9.8192e-11	-1.24461e-10																0.0016	-1.72616e-10	-1.4684e-10	-7.18275e-11
		0.00162	-1.72642e-10	-9.81598e-11	-1.24465e-10																0.00162	-1.72642e-10	-1.4681e-10	-7.18166e-11
		0.00164	-1.72669e-10	-9.8127e-11	-1.24471e-10																0.00164	-1.72669e-10	-1.4678e-10	-7.18058e-11
		0.00166	-1.72696e-10	-9.80936e-11	-1.24479e-10																0.00166	-1.72696e-10	-1.46749e-10	-7.17951e-11
		0.00168	-1.72724e-10	-9.80596e-11	-1.24488e-10																0.00168	-1.72724e-10	-1.46717e-10	-7.17848e-11
		0.0017	-1.72751e-10	-9.80252e-11	-1.24497e-10																0.0017	-1.72751e-10	-1.46686e-10	-7.17749e-11
		0.00172	-1.72779e-10	-9.79905e-11	-1.24509e-10																0.00172	-1.72779e-10	-1.46654e-10	-7.17659e-11
		0.00174	-1.72806e-10	-9.79556e-11	-1.24521e-10																0.00174	-1.72806e-10	-1.46623e-10	-7.17577e-11
		0.00176	-1.72833e-10	-9.79207e-11	-1.24534e-10																0.00176	-1.72833e-10	-1.46592e-10	-7.17508e-11
		0.00178	-1.72861e-10	-9.7886e-11	-1.24548e-10																0.00178	-1.72861e-10	-1.4656e-10	-7.17452e-11
		0.0018	-1.72888e-10	-9.78517e-11	-1.24563e-10																0.0018	-1.72888e-10	-1.4653e-10	-7.17411e-11
		0.00182	-1.72916e-10	-9.78178e-11	-1.24578e-10																0.00182	-1.72916e-10	-1.46499e-10	-7.17387e-11
		0.00184	-1.72943e-10	-9.77845e-11	-1.24594e-10																0.00184	-1.72943e-10	-1.4647e-10	-7.1738e-11
		0.00186	-1.72971e-10	-9.7752e-11	-1.2461e-10																0.00186	-1.72971e-10	-1.4644e-10	-7.1739e-11
		0.00188	-1.73e-10	-9.77202e-11	-1.24627e-10																0.00188	-1.73e-10	-1.46412e-10	-7.17419e-11
		0.0019	-1.73028e-10	-9.76895e-11	-1.24644e-10																0.0019	-1.73028e-10	-1.46384e-10	-7.17466e-11
		0.00192	-1.73057e-10	-9.76597e-11	-1.24661e-10																0.00192	-1.73057e-10	-1.46357e-10	-7.17531e-11
		0.00194	-1.73085e-10	-9.76311e-11	-1.24678e-10																0.00194	-1.73085e-10	-1.46331e-10	-7.17616e-11
		0.00196	-1.73114e-10	-9.76036e-11	-1.24696e-10																0.00196	-1.73114e-10	-1.46306e-10	-7.17718e-11
		0.00198	-1.73142e-10	-9.75774e-11	-1.24713e-10																0.00198	-1.73142e-10	-1.46283e-10	-7.17838e-11
		0.002	-1.7317e-10	-9.75524e-11	-1.24731e-10																0.002	-1.7317e-10	-1.4626e-10	-7.17973e-11
		0.00202	-1.73197e-10	-9.75288e-11	-1.24749e-10																0.00202	-1.73197e-10	-1.46239e-10	-7.18122e-11
		0.00204	-1.73224e-10	-9.75067e-11	-1.24767e-10																0.00204	-1.73224e-10	-1.46219e-10	-7.18282e-11
		0.00206	-1.7325e-10	-9.74861e-11	-1.24784e-10																0.00206	-1.7325e-10	-1.462e-10	-7.18448e-11
		0.00208	-1.73275e-10	-9.74671e-11	-1.24802e-10																0.00208	-1.73275e-10	-1.46182e-10	-7.18621e-11
		0.0021	-1.733e-10	-9.74496e-11	-1.24819e-10																0.0021	-1.733e-10	-1.46166e-10	-7.18796e-11
		0.00212	-1.73324e-10	-9.74335e-11	-1.24836e-10																0.00212	-1.73324e-10	-1.46151e-10	-7.1897e-11
		0.00214	-1.73348e-10	-9.74187e-11	-1.24853e-10																0.00214	-1.73348e-10	-1.46137e-10	-7.1914e-11
		0.00216	-1.73371e-10	-9.74044e-11	-1.2487e-10																0.00216	-1.73371e-10	-1.46123e-10	-7.19298e-11
		0.00218	-1.73393e-10	-9.73899e-11	-1.24886e-10																0.00218	-1.73393e-10	-1.46109e-10	-7.19433e-11
		0.0022	-1.73417e-10	-9.7374e-11	-1.24902e-10																0.0022	-1.73417e-10	-1.46094e-10	-7.19531e-11
		0.00222	-1.73441e-10	-9.73554e-11	-1.24915e-10																0.00222	-1.73441e-10	-1.46076e-10	-7.19575e-11
		0.00224	-1.73467e-10	-9.73326e-11	-1.24926e-10																0.00224	-1.73467e-10	-1.46055e-10	-7.19546e-11
		0.00226	-1.73495e-10	-9.7304e-11	-1.24933e-10																0.00226	-1.73495e-10	-1.46029e-10	-7.19426e-11
		0.00228	-1.73527e-10	-9.72683e-11	-1.24935e-10																0.00228	-1.73527e-10	-1.45996e-10	-7.19198e-11
		0.0023	-1.73563e-10	-9.72243e-11	-1.2493e-10																0.0023	-1.73563e-10	-1.45956e-10	-7.18846e-11
		0.00232	-1.73605e-10	-9.7171e-11	-1.24917e-10																0.00232	-1.73605e-10	-1.45906e-10	-7.18361e-11
		0.00234	-1.73654e-10	-9.71079e-11	-1.24895e-10																0.00234	-1.73654e-10	-1.45846e-10	-7.17735e-11
		0.00236	-1.7371e-10	-9.70349e-11	-1.24861e-10																0.00236	-1.7371e-10	-1.45775e-10	-7.16965e-11
		0.00238	-1.73774e-10	-9.69523e-11	-1.24816e-10																0.00238	-1.73774e-10	-1.45692e-10	-7.16054e-11
		0.0024	-1.73848e-10	-9.68606e-11	-1.24758e-10																0.0024	-1.73848e-10	-1.45597e-10	-7.15006e-11
		0.00242	-1.73932e-10	-9.67607e-11	-1.24686e-10																0.00242	-1.73932e-10	-1.45491e-10	-7.13833e-11
		0.00244	-1.74028e-10	-9.6654e-11	-1.24601e-10																0.00244	-1.74028e-10	-1.45373e-10	-7.12548e-11
		0.00246	-1.74137e-10	-9.65418e-11	-1.24501e-10																0.00246	-1.74137e-10	-1.45243e-10	-7.11169e-11
		0.00248	-1.74259e-10	-9.64261e-11	-1.24387e-10																0.00248	-1.74259e-10	-1.45105e-10	-7.09717e-11
		0.0025	-1.74396e-10	-9.63088e-11	-1.2426e-10																0.0025	-1.74396e-10	-1.44957e-10	-7.08215e-11
		0.00252	-1.74549e-10	-9.6192e-11	-1.24119e-10																0.00252	-1.74549e-10	-1.44802e-10	-7.06689e-11
		0.00254	-1.74721e-10	-9.60782e-11	-1.23966e-10																0.00254	-1.74721e-10	-1.44641e-10	-7.05166e-11
		0.00256	-1.74911e-10	-9.59697e-11	-1.23801e-10																0.00256	-1.74911e-10	-1.44477e-10	-7.03677e-11
		0.00258	-1.75123e-10	-9.58691e-11	-1.23626e-10																0.00258	-1.75123e-10	-1.44311e-10	-7.02251e-11
		0.0026	-1.75357e-10	-9.57794e-11	-1.23441e-10																0.0026	-1.75357e-10	-1.44146e-10	-7.00921e-11
		0.00262	-1.75615e-10	-9.57031e-11	-1.23249e-10																0.00262	-1.75615e-10	-1.43985e-10	-6.99721e-11
		0.00264	-1.75899e-10	-9.56433e-11	-1.23049e-10																0.00264	-1.75899e-10	-1.43828e-10	-6.98685e-11
		0.00266	-1.7621e-10	-9.56027e-11	-1.22845e-10																0.00266	-1.7621e-10	-1.43681e-10	-6.97848e-11
		0.00268	-1.76549e-10	-9.55843e-11	-1.22638e-10																0.00268	-1.76549e-10	-1.43544e-10	-6.97245e-11
		0.0027	-1.76918e-10	-9.55909e-11	-1.2243e-10																0.0027	-1.76918e-10	-1.43422e-10	-6.96911e-11
		0.00272	-1.77318e-10	-9.56254e-11	-1.22223e-10																0.00272	-1.77318e-10	-1.43317e-10	-6.96879e-11
		0.00274	-1.7775e-10	-9.56906e-11	-1.2202e-10																0.00274	-1.7775e-10	-1.43231e-10	-6.97184e-11
		0.00276	-1.78216e-10	-9.57893e-11	-1.21822e-10																0.00276	-1.78216e-10	-1.43168e-10	-6.97857e-11
		0.00278	-1.78717e-10	-9.59239e-11	-1.21633e-10																0.00278	-1.78717e-10	-1.43131e-10	-6.98932e-11
		0.0028	-1.79253e-10	-9.60972e-11	-1.21455e-10																0.0028	-1.79253e-10	-1.43123e-10	-7.00439e-11
		0.00282	-1.79825e-10	-9.63113e-11	-1.2129e-10																0.00282	-1.79825e-10	-1.43145e-10	-7.0241e-11
		0.00284	-1.80433e-10	-9.65687e-11	-1.21142e-10																0.00284	-1.80433e-10	-1.43202e-10	-7.04871e-11
		0.00286	-1.8108e-10	-9.68714e-11	-1.21011e-10																0.00286	-1.8108e-10	-1.43295e-10	-7.0785e-11
		0.00288	-1.81764e-10	-9.72214e-11	-1.20902e-10																0.00288	-1.81764e-10	-1.43427e-10	-7.11372e-11
		0.0029	-1.82487e-10	-9.76204e-11	-1.20815e-10																0.0029	-1.82487e-10	-1.43601e-10	-7.15458e-11
		0.00292	-1.83248e-10	-9.80703e-11	-1.20754e-10																0.00292	-1.83248e-10	-1.43819e-10	-7.20129e-11
		0.00294	-1.84049e-10	-9.85723e-11	-1.2072e-10																0.00294	-1.84049e-10	-1.44082e-10	-7.25402e-11
		0.00296	-1.84889e-10	-9.91276e-11	-1.20717e-10																0.00296	-1.84889e-10	-1.44393e-10	-7.31294e-11
		0.00298	-1.85767e-10	-9.97372e-11	-1.20745e-10																0.00298	-1.85767e-10	-1.44753e-10	-7.37819e-11
		0.003	-1.86685e-10	-1.00402e-10	-1.20809e-10																0.003	-1.86685e-10	-1.45165e-10	-7.44986e-11
		0.00302	-1.8764e-10	-1.01122e-10	-1.20908e-10																0.00302	-1.8764e-10	-1.4563e-10	-7.52806e-11
		0.00304	-1.88634e-10	-1.01898e-10	-1.21046e-10																0.00304	-1.88634e-10	-1.46149e-10	-7.61282e-11
		0.00306	-1.89666e-10	-1.0273e-10	-1.21225e-10																0.00306	-1.89666e-10	-1.46723e-10	-7.7042e-11
		0.00308	-1.90733e-10	-1.03618e-10	-1.21445e-10																0.00308	-1.90733e-10	-1.47354e-10	-7.80218e-11
		0.0031	-1.91837e-10	-1.04562e-10	-1.21708e-10																0.0031	-1.91837e-10	-1.48041e-10	-7.90675e-11
		0.00312	-1.92976e-10	-1.05561e-10	-1.22015e-10																0.00312	-1.92976e-10	-1.48787e-10	-8.01789e-11
		0.00314	-1.9415e-10	-1.06614e-10	-1.22369e-10																0.00314	-1.9415e-10	-1.4959e-10	-8.13552e-11
		0.00316	-1.95357e-10	-1.07721e-10	-1.22769e-10																0.00316	-1.95357e-10	-1.50452e-10	-8.25957e-11
		0.00318	-1.96596e-10	-1.08879e-10	-1.23217e-10																0.00318	-1.96596e-10	-1.51372e-10	-8.38991e-11
		0.0032	-1.97866e-10	-1.10089e-10	-1.23713e-10																0.0032	-1.97866e-10	-1.52349e-10	-8.52642e-11
		0.00322	-1.99166e-10	-1.11347e-10	-1.24259e-10																0.00322	-1.99166e-10	-1.53383e-10	-8.66891e-11
		0.00324	-2.00494e-10	-1.12653e-10	-1.24854e-10																0.00324	-2.00494e-10	-1.54474e-10	-8.81717e-11
		0.00326	-2.01848e-10	-1.14004e-10	-1.25497e-10																0.00326	-2.01848e-10	-1.5562e-10	-8.97098e-11
		0.00328	-2.03227e-10	-1.15397e-10	-1.2619e-10																0.00328	-2.03227e-10	-1.5682e-10	-9.13008e-11
		0.0033	-2.04629e-10	-1.16832e-10	-1.26932e-10																0.0033	-2.04629e-10	-1.58072e-10	-9.29417e-11
		0.00332	-2.0605e-10	-1.18305e-10	-1.27721e-10																0.00332	-2.0605e-10	-1.59374e-10	-9.46295e-11
		0.00334	-2.0749e-10	-1.19813e-10	-1.28557e-10																0.00334	-2.0749e-10	-1.60725e-10	-9.6361e-11
		0.00336	-2.08945e-10	-1.21353e-10	-1.2944e-10																0.00336	-2.08945e-10	-1.62122e-10	-9.81325e-11
		0.00338	-2.10414e-10	-1.22923e-10	-1.30368e-10																0.00338	-2.10414e-10	-1.63562e-10	-9.99405e-11
		0.0034	-2.11893e-10	-1.24518e-10	-1.31339e-10																0.0034	-2.11893e-10	-1.65044e-10	-1.01781e-10
		0.00342	-2.13381e-10	-1.26136e-10	-1.32353e-10																0.00342	-2.13381e-10	-1.66563e-10	-1.03651e-10
		0.00344	-2.14876e-10	-1.27773e-10	-1.33407e-10																0.00344	-2.14876e-10	-1.68117e-10	-1.05545e-10
		0.00346	-2.16374e-10	-1.29424e-10	-1.34501e-10																0.00346	-2.16374e-10	-1.69704e-10	-1.07459e-10
		0.00348	-2.17872e-10	-1.31087e-10	-1.3563e-10																0.00348	-2.17872e-10	-1.71319e-10	-1.0939e-10
		0.0035	-2.19369e-10	-1.32757e-10	-1.36795e-10																0.0035	-2.19369e-10	-1.7296e-10	-1.11332e-10
		0.00352	-2.20862e-10	-1.34431e-10	-1.37992e-10																0.00352	-2.20862e-10	-1.74624e-10	-1.13282e-10
		0.00354	-2.22347e-10	-1.36105e-10	-1.39218e-10																0.00354	-2.22347e-10	-1.76306e-10	-1.15234e-10
		0.00356	-2.23823e-10	-1.37775e-10	-1.40472e-10																0.00356	-2.23823e-10	-1.78004e-10	-1.17185e-10
		0.00358	-2.25286e-10	-1.39436e-10	-1.41751e-10																0.00358	-2.25286e-10	-1.79713e-10	-1.19128e-10
		0.0036	-2.26734e-10	-1.41086e-10	-1.43052e-10																0.0036	-2.26734e-10	-1.8143e-10	-1.21061e-10
		0.00362	-2.28165e-10	-1.42719e-10	-1.44371e-10																0.00362	-2.28165e-10	-1.83152e-10	-1.22977e-10
		0.00364	-2.29575e-10	-1.44333e-10	-1.45706e-10																0.00364	-2.29575e-10	-1.84873e-10	-1.24873e-10
		0.00366	-2.30965e-10	-1.45923e-10	-1.47054e-10																0.00366	-2.30965e-10	-1.86592e-10	-1.26745e-10
		0.00368	-2.3233e-10	-1.47486e-10	-1.48412e-10																0.00368	-2.3233e-10	-1.88303e-10	-1.28587e-10
		0.0037	-2.33669e-10	-1.49018e-10	-1.49776e-10																0.0037	-2.33669e-10	-1.90003e-10	-1.30395e-10
		0.00372	-2.3498e-10	-1.50515e-10	-1.51143e-10																0.00372	-2.3498e-10	-1.91688e-10	-1.32166e-10
		0.00374	-2.36261e-10	-1.51975e-10	-1.52512e-10																0.00374	-2.36261e-10	-1.93355e-10	-1.33896e-10
		0.00376	-2.3751e-10	-1.53393e-10	-1.53877e-10																0.00376	-2.3751e-10	-1.95e-10	-1.3558e-10
		0.00378	-2.38724e-10	-1.54767e-10	-1.55237e-10																0.00378	-2.38724e-10	-1.9662e-10	-1.37216e-10
		0.0038	-2.39902e-10	-1.56094e-10	-1.56588e-10																0.0038	-2.39902e-10	-1.9821e-10	-1.38799e-10
		0.00382	-2.41042e-10	-1.57371e-10	-1.57927e-10																0.00382	-2.41042e-10	-1.99768e-10	-1.40328e-10
		0.00384	-2.42143e-10	-1.58596e-10	-1.59251e-10																0.00384	-2.42143e-10	-2.01291e-10	-1.41798e-10
		0.00386	-2.43203e-10	-1.59767e-10	-1.60558e-10																0.00386	-2.43203e-10	-2.02776e-10	-1.43207e-10
		0.00388	-2.4422e-10	-1.60881e-10	-1.61845e-10																0.00388	-2.4422e-10	-2.04219e-10	-1.44553e-10
		0.0039	-2.45195e-10	-1.61936e-10	-1.63107e-10																0.0039	-2.45195e-10	-2.05618e-10	-1.45834e-10
		0.00392	-2.46126e-10	-1.62932e-10	-1.64344e-10																0.00392	-2.46126e-10	-2.06971e-10	-1.47046e-10
		0.00394	-2.47013e-10	-1.63866e-10	-1.65552e-10																0.00394	-2.47013e-10	-2.08275e-10	-1.48189e-10
		0.00396	-2.47855e-10	-1.64738e-10	-1.6673e-10																0.00396	-2.47855e-10	-2.09528e-10	-1.49261e-10
		0.00398	-2.48653e-10	-1.65546e-10	-1.67873e-10																0.00398	-2.48653e-10	-2.10728e-10	-1.50261e-10
		0.004	-2.49407e-10	-1.66291e-10	-1.68981e-10																0.004	-2.49407e-10	-2.11872e-10	-1.51187e-10
		0.00402	-2.50116e-10	-1.66971e-10	-1.70052e-10																0.00402	-2.50116e-10	-2.1296e-10	-1.5204e-10
		0.00404	-2.50783e-10	-1.67587e-10	-1.71083e-10																0.00404	-2.50783e-10	-2.1399e-10	-1.52818e-10
		0.00406	-2.51406e-10	-1.68139e-10	-1.72073e-10																0.00406	-2.51406e-10	-2.14961e-10	-1.53522e-10
		0.00408	-2.51986e-10	-1.68627e-10	-1.7302e-10																0.00408	-2.51986e-10	-2.15872e-10	-1.54151e-10
		0.0041	-2.52525e-10	-1.69051e-10	-1.73922e-10																0.0041	-2.52525e-10	-2.16722e-10	-1.54705e-10
		0.00412	-2.53023e-10	-1.69413e-10	-1.74779e-10																0.00412	-2.53023e-10	-2.17511e-10	-1.55187e-10
		0.00414	-2.5348e-10	-1.69714e-10	-1.75588e-10																0.00414	-2.5348e-10	-2.1824e-10	-1.55597e-10
		0.00416	-2.53898e-10	-1.69956e-10	-1.7635e-10																0.00416	-2.53898e-10	-2.18907e-10	-1.55937e-10
		0.00418	-2.54277e-10	-1.70142e-10	-1.77063e-10																0.00418	-2.54277e-10	-2.19516e-10	-1.56209e-10
		0.0042	-2.54619e-10	-1.70274e-10	-1.77728e-10																0.0042	-2.54619e-10	-2.20066e-10	-1.56417e-10
		0.00422	-2.54923e-10	-1.70355e-10	-1.78344e-10																0.00422	-2.54923e-10	-2.20559e-10	-1.56563e-10
		0.00424	-2.55191e-10	-1.7039e-10	-1.78913e-10																0.00424	-2.55191e-10	-2.20999e-10	-1.56653e-10
		0.00426	-2.55424e-10	-1.70381e-10	-1.79435e-10																0.00426	-2.55424e-10	-2.21387e-10	-1.5669e-10
		0.00428	-2.55623e-10	-1.70334e-10	-1.79912e-10																0.00428	-2.55623e-10	-2.21726e-10	-1.56679e-10
		0.0043	-2.55788e-10	-1.70251e-10	-1.80347e-10																0.0043	-2.55788e-10	-2.2202e-10	-1.56623e-10
		0.00432	-2.55921e-10	-1.70136e-10	-1.8074e-10																0.00432	-2.55921e-10	-2.2227e-10	-1.56528e-10
		0.00434	-2.56023e-10	-1.69993e-10	-1.81095e-10																0.00434	-2.56023e-10	-2.22481e-10	-1.56397e-10
		0.00436	-2.56096e-10	-1.69825e-10	-1.81412e-10																0.00436	-2.56096e-10	-2.22655e-10	-1.56233e-10
		0.00438	-2.5614e-10	-1.69633e-10	-1.81694e-10																0.00438	-2.5614e-10	-2.22794e-10	-1.5604e-10
		0.0044	-2.56158e-10	-1.69422e-10	-1.81944e-10																0.0044	-2.56158e-10	-2.22902e-10	-1.55821e-10
		0.00442	-2.56151e-10	-1.69193e-10	-1.82163e-10																0.00442	-2.56151e-10	-2.22982e-10	-1.55579e-10
		0.00444	-2.5612e-10	-1.68948e-10	-1.82353e-10																0.00444	-2.5612e-10	-2.23034e-10	-1.55315e-10
		0.00446	-2.56067e-10	-1.6869e-10	-1.82517e-10																0.00446	-2.56067e-10	-2.23062e-10	-1.55033e-10
		0.00448	-2.55994e-10	-1.6842e-10	-1.82655e-10																0.00448	-2.55994e-10	-2.23067e-10	-1.54734e-10
		0.0045	-2.55901e-10	-1.6814e-10	-1.8277e-10																0.0045	-2.55901e-10	-2.23051e-10	-1.54421e-10
		0.00452	-2.55789e-10	-1.6785e-10	-1.82863e-10																0.00452	-2.55789e-10	-2.23015e-10	-1.54094e-10
		0.00454	-2.55661e-10	-1.67553e-10	-1.82936e-10																0.00454	-2.55661e-10	-2.22961e-10	-1.53756e-10
		0.00456	-2.55516e-10	-1.6725e-10	-1.8299e-10																0.00456	-2.55516e-10	-2.22891e-10	-1.53409e-10
		0.00458	-2.55357e-10	-1.66941e-10	-1.83025e-10																0.00458	-2.55357e-10	-2.22805e-10	-1.53052e-10
		0.0046	-2.55183e-10	-1.66627e-10	-1.83045e-10																0.0046	-2.55183e-10	-2.22704e-10	-1.52689e-10
		0.00462	-2.54997e-10	-1.66309e-10	-1.83048e-10																0.00462	-2.54997e-10	-2.2259e-10	-1.5232e-10
		0.00464	-2.54798e-10	-1.65989e-10	-1.83038e-10																0.00464	-2.54798e-10	-2.22464e-10	-1.51945e-10
		0.00466	-2.54588e-10	-1.65666e-10	-1.83015e-10																0.00466	-2.54588e-10	-2.22326e-10	-1.51567e-10
		0.00468	-2.54368e-10	-1.65342e-10	-1.8298e-10																0.00468	-2.54368e-10	-2.22177e-10	-1.51184e-10
		0.0047	-2.54138e-10	-1.65017e-10	-1.82934e-10																0.0047	-2.54138e-10	-2.22019e-10	-1.508e-10
		0.00472	-2.53899e-10	-1.64693e-10	-1.82877e-10																0.00472	-2.53899e-10	-2.21852e-10	-1.50413e-10
		0.00474	-2.53653e-10	-1.64368e-10	-1.82812e-10																0.00474	-2.53653e-10	-2.21676e-10	-1.50025e-10
		0.00476	-2.53399e-10	-1.64046e-10	-1.82738e-10																0.00476	-2.53399e-10	-2.21493e-10	-1.49636e-10
		0.00478	-2.53139e-10	-1.63725e-10	-1.82657e-10																0.00478	-2.53139e-10	-2.21304e-10	-1.49247e-10
		0.0048	-2.52873e-10	-1.63406e-10	-1.82568e-10																0.0048	-2.52873e-10	-2.21108e-10	-1.48859e-10
		0.00482	-2.52603e-10	-1.6309e-10	-1.82473e-10																0.00482	-2.52603e-10	-2.20907e-10	-1.48472e-10
		0.00484	-2.52327e-10	-1.62777e-10	-1.82373e-10																0.00484	-2.52327e-10	-2.20701e-10	-1.48086e-10
		0.00486	-2.52048e-10	-1.62468e-10	-1.82267e-10																0.00486	-2.52048e-10	-2.2049e-10	-1.47703e-10
		0.00488	-2.51766e-10	-1.62162e-10	-1.82157e-10																0.00488	-2.51766e-10	-2.20276e-10	-1.47323e-10
		0.0049	-2.5148e-10	-1.6186e-10	-1.82042e-10																0.0049	-2.5148e-10	-2.20059e-10	-1.46946e-10
		0.00492	-2.51192e-10	-1.61561e-10	-1.81924e-10																0.00492	-2.51192e-10	-2.19838e-10	-1.46572e-10
		0.00494	-2.50903e-10	-1.61266e-10	-1.81802e-10																0.00494	-2.50903e-10	-2.19616e-10	-1.46203e-10
		0.00496	-2.50612e-10	-1.60976e-10	-1.81678e-10																0.00496	-2.50612e-10	-2.19392e-10	-1.45837e-10
		0.00498	-2.50319e-10	-1.60689e-10	-1.81551e-10																0.00498	-2.50319e-10	-2.19166e-10	-1.45476e-10
		0.005	-2.50026e-10	-1.60407e-10	-1.81421e-10																0.005	-2.50026e-10	-2.18939e-10	-1.4512e-10
		0.00502	-2.49733e-10	-1.60129e-10	-1.81289e-10																0.00502	-2.49733e-10	-2.18711e-10	-1.44769e-10
		0.00504	-2.4944e-10	-1.59855e-10	-1.81156e-10																0.00504	-2.4944e-10	-2.18482e-10	-1.44423e-10
		0.00506	-2.49147e-10	-1.59586e-10	-1.81021e-10																0.00506	-2.49147e-10	-2.18254e-10	-1.44083e-10
		0.00508	-2.48855e-10	-1.59322e-10	-1.80884e-10																0.00508	-2.48855e-10	-2.18025e-10	-1.43747e-10
		0.0051	-2.48562e-10	-1.59062e-10	-1.80746e-10																0.0051	-2.48562e-10	-2.17796e-10	-1.43418e-10
		0.00512	-2.4827e-10	-1.58808e-10	-1.80607e-10																0.00512	-2.4827e-10	-2.17568e-10	-1.43094e-10
		0.00514	-2.47978e-10	-1.58558e-10	-1.80466e-10																0.00514	-2.47978e-10	-2.1734e-10	-1.42775e-10
		0.00516	-2.47686e-10	-1.58314e-10	-1.80324e-10																0.00516	-2.47686e-10	-2.17113e-10	-1.42463e-10
		0.00518	-2.47392e-10	-1.58075e-10	-1.8018e-10																0.00518	-2.47392e-10	-2.16889e-10	-1.42158e-10
		0.0052	-2.47097e-10	-1.57844e-10	-1.80035e-10																0.0052	-2.47097e-10	-2.16666e-10	-1.41861e-10
		0.00522	-2.468e-10	-1.5762e-10	-1.79888e-10																0.00522	-2.468e-10	-2.16448e-10	-1.41574e-10
		0.00524	-2.46498e-10	-1.57405e-10	-1.79742e-10																0.00524	-2.46498e-10	-2.16234e-10	-1.41299e-10
		0.00526	-2.46192e-10	-1.572e-10	-1.79597e-10																0.00526	-2.46192e-10	-2.16026e-10	-1.41036e-10
		0.00528	-2.4588e-10	-1.57007e-10	-1.79454e-10																0.00528	-2.4588e-10	-2.15827e-10	-1.40787e-10
		0.0053	-2.45562e-10	-1.56825e-10	-1.79315e-10																0.0053	-2.45562e-10	-2.15636e-10	-1.40555e-10
		0.00532	-2.45235e-10	-1.56655e-10	-1.7918e-10																0.00532	-2.45235e-10	-2.15457e-10	-1.40338e-10
		0.00534	-2.449e-10	-1.56498e-10	-1.79053e-10																0.00534	-2.449e-10	-2.15289e-10	-1.40138e-10
		0.00536	-2.44555e-10	-1.56353e-10	-1.78933e-10																0.00536	-2.44555e-10	-2.15134e-10	-1.39955e-10
		0.00538	-2.44199e-10	-1.5622e-10	-1.78823e-10																0.00538	-2.44199e-10	-2.14993e-10	-1.39788e-10
		0.0054	-2.43831e-10	-1.56097e-10	-1.78724e-10																0.0054	-2.43831e-10	-2.14865e-10	-1.39637e-10
		0.00542	-2.4345e-10	-1.55984e-10	-1.78635e-10																0.00542	-2.4345e-10	-2.14751e-10	-1.39499e-10
		0.00544	-2.43054e-10	-1.55878e-10	-1.78559e-10																0.00544	-2.43054e-10	-2.1465e-10	-1.39374e-10
		0.00546	-2.42644e-10	-1.55779e-10	-1.78495e-10																0.00546	-2.42644e-10	-2.14562e-10	-1.3926e-10
		0.00548	-2.42217e-10	-1.55685e-10	-1.78443e-10																0.00548	-2.42217e-10	-2.14485e-10	-1.39154e-10
		0.0055	-2.41772e-10	-1.55593e-10	-1.78405e-10																0.0055	-2.41772e-10	-2.14418e-10	-1.39053e-10
		0.00552	-2.41308e-10	-1.55501e-10	-1.78378e-10																0.00552	-2.41308e-10	-2.1436e-10	-1.38956e-10
		0.00554	-2.40824e-10	-1.55407e-10	-1.78363e-10																0.00554	-2.40824e-10	-2.14309e-10	-1.38858e-10
		0.00556	-2.40319e-10	-1.55308e-10	-1.7836e-10																0.00556	-2.40319e-10	-2.14262e-10	-1.38757e-10
		0.00558	-2.39792e-10	-1.55201e-10	-1.78366e-10																0.00558	-2.39792e-10	-2.14218e-10	-1.3865e-10
		0.0056	-2.3924e-10	-1.55084e-10	-1.78381e-10																0.0056	-2.3924e-10	-2.14175e-10	-1.38533e-10
		0.00562	-2.38663e-10	-1.54954e-10	-1.78403e-10																0.00562	-2.38663e-10	-2.14129e-10	-1.38402e-10
		0.00564	-2.38059e-10	-1.54808e-10	-1.7843e-10																0.00564	-2.38059e-10	-2.1408e-10	-1.38255e-10
		0.00566	-2.37426e-10	-1.54642e-10	-1.78462e-10																0.00566	-2.37426e-10	-2.14023e-10	-1.38087e-10
		0.00568	-2.36764e-10	-1.54454e-10	-1.78495e-10																0.00568	-2.36764e-10	-2.13956e-10	-1.37896e-10
		0.0057	-2.3607e-10	-1.54241e-10	-1.78529e-10																0.0057	-2.3607e-10	-2.13877e-10	-1.37676e-10
		0.00572	-2.35344e-10	-1.54e-10	-1.7856e-10																0.00572	-2.35344e-10	-2.13783e-10	-1.37425e-10
		0.00574	-2.34585e-10	-1.53728e-10	-1.78588e-10																0.00574	-2.34585e-10	-2.1367e-10	-1.37138e-10
		0.00576	-2.33791e-10	-1.53422e-10	-1.7861e-10																0.00576	-2.33791e-10	-2.13536e-10	-1.36813e-10
		0.00578	-2.32963e-10	-1.53079e-10	-1.78623e-10																0.00578	-2.32963e-10	-2.13378e-10	-1.36446e-10
		0.0058	-2.32098e-10	-1.52697e-10	-1.78626e-10																0.0058	-2.32098e-10	-2.13192e-10	-1.36033e-10
		0.00582	-2.31197e-10	-1.52274e-10	-1.78617e-10																0.00582	-2.31197e-10	-2.12977e-10	-1.35572e-10
		0.00584	-2.30259e-10	-1.51807e-10	-1.78593e-10																0.00584	-2.30259e-10	-2.1273e-10	-1.35059e-10
		0.00586	-2.29283e-10	-1.51294e-10	-1.78551e-10																0.00586	-2.29283e-10	-2.12447e-10	-1.34492e-10
		0.00588	-2.28269e-10	-1.50734e-10	-1.78491e-10																0.00588	-2.28269e-10	-2.12126e-10	-1.33868e-10
		0.0059	-2.27217e-10	-1.50123e-10	-1.78409e-10																0.0059	-2.27217e-10	-2.11766e-10	-1.33185e-10
		0.00592	-2.26127e-10	-1.49462e-10	-1.78303e-10																0.00592	-2.26127e-10	-2.11362e-10	-1.3244e-10
		0.00594	-2.24998e-10	-1.48748e-10	-1.78171e-10																0.00594	-2.24998e-10	-2.10914e-10	-1.31633e-10
		0.00596	-2.2383e-10	-1.47981e-10	-1.78011e-10																0.00596	-2.2383e-10	-2.10419e-10	-1.3076e-10
		0.00598	-2.22624e-10	-1.4716e-10	-1.7782e-10																0.00598	-2.22624e-10	-2.09876e-10	-1.29821e-10
		0.006	-2.21379e-10	-1.46283e-10	-1.77596e-10																0.006	-2.21379e-10	-2.09282e-10	-1.28816e-10
		0.00602	-2.20096e-10	-1.4535e-10	-1.77338e-10																0.00602	-2.20096e-10	-2.08636e-10	-1.27742e-10
		0.00604	-2.18775e-10	-1.44361e-10	-1.77044e-10																0.00604	-2.18775e-10	-2.07937e-10	-1.266e-10
		0.00606	-2.17416e-10	-1.43317e-10	-1.76712e-10																0.00606	-2.17416e-10	-2.07183e-10	-1.25389e-10
		0.00608	-2.16021e-10	-1.42216e-10	-1.76341e-10																0.00608	-2.16021e-10	-2.06375e-10	-1.2411e-10
		0.0061	-2.1459e-10	-1.41061e-10	-1.75929e-10																0.0061	-2.1459e-10	-2.0551e-10	-1.22763e-10
		0.00612	-2.13125e-10	-1.3985e-10	-1.75475e-10																0.00612	-2.13125e-10	-2.04589e-10	-1.21349e-10
		0.00614	-2.11626e-10	-1.38587e-10	-1.74978e-10																0.00614	-2.11626e-10	-2.0361e-10	-1.19868e-10
		0.00616	-2.10095e-10	-1.37271e-10	-1.74439e-10																0.00616	-2.10095e-10	-2.02575e-10	-1.18322e-10
		0.00618	-2.08535e-10	-1.35904e-10	-1.73855e-10																0.00618	-2.08535e-10	-2.01483e-10	-1.16712e-10
		0.0062	-2.06945e-10	-1.34488e-10	-1.73226e-10																0.0062	-2.06945e-10	-2.00334e-10	-1.15041e-10
		0.00622	-2.05329e-10	-1.33025e-10	-1.72553e-10																0.00622	-2.05329e-10	-1.9913e-10	-1.13311e-10
		0.00624	-2.03687e-10	-1.31516e-10	-1.71835e-10																0.00624	-2.03687e-10	-1.97871e-10	-1.11523e-10
		0.00626	-2.02022e-10	-1.29965e-10	-1.71071e-10																0.00626	-2.02022e-10	-1.96558e-10	-1.09681e-10
		0.00628	-2.00337e-10	-1.28374e-10	-1.70264e-10																0.00628	-2.00337e-10	-1.95194e-10	-1.07787e-10
		0.0063	-1.98633e-10	-1.26746e-10	-1.69411e-10																0.0063	-1.98633e-10	-1.93779e-10	-1.05845e-10
		0.00632	-1.96913e-10	-1.25082e-10	-1.68515e-10																0.00632	-1.96913e-10	-1.92317e-10	-1.03857e-10
		0.00634	-1.9518e-10	-1.23388e-10	-1.67576e-10																0.00634	-1.9518e-10	-1.90808e-10	-1.01827e-10
		0.00636	-1.93435e-10	-1.21665e-10	-1.66595e-10																0.00636	-1.93435e-10	-1.89256e-10	-9.9759e-11
		0.00638	-1.91683e-10	-1.19917e-10	-1.65572e-10																0.00638	-1.91683e-10	-1.87662e-10	-9.76561e-11
		0.0064	-1.89924e-10	-1.18147e-10	-1.6451e-10																0.0064	-1.89924e-10	-1.86029e-10	-9.55226e-11
		0.00642	-1.88161e-10	-1.16359e-10	-1.6341e-10																0.00642	-1.88161e-10	-1.8436e-10	-9.33627e-11
		0.00644	-1.86398e-10	-1.14556e-10	-1.62272e-10																0.00644	-1.86398e-10	-1.82658e-10	-9.11806e-11
		0.00646	-1.84638e-10	-1.12742e-10	-1.611e-10																0.00646	-1.84638e-10	-1.80925e-10	-8.89809e-11
		0.00648	-1.82881e-10	-1.10921e-10	-1.59894e-10																0.00648	-1.82881e-10	-1.79166e-10	-8.6768e-11
		0.0065	-1.81133e-10	-1.09097e-10	-1.58657e-10																0.0065	-1.81133e-10	-1.77383e-10	-8.45465e-11
		0.00652	-1.79394e-10	-1.07272e-10	-1.5739e-10																0.00652	-1.79394e-10	-1.7558e-10	-8.23209e-11
		0.00654	-1.77668e-10	-1.05452e-10	-1.56097e-10																0.00654	-1.77668e-10	-1.73761e-10	-8.00957e-11
		0.00656	-1.75957e-10	-1.0364e-10	-1.54778e-10																0.00656	-1.75957e-10	-1.71929e-10	-7.78758e-11
		0.00658	-1.74265e-10	-1.0184e-10	-1.53438e-10																0.00658	-1.74265e-10	-1.70088e-10	-7.56657e-11
		0.0066	-1.72592e-10	-1.00056e-10	-1.52077e-10																0.0066	-1.72592e-10	-1.68241e-10	-7.34702e-11
		0.00662	-1.70941e-10	-9.82917e-11	-1.507e-10																0.00662	-1.70941e-10	-1.66394e-10	-7.12939e-11
		0.00664	-1.69316e-10	-9.65499e-11	-1.49308e-10																0.00664	-1.69316e-10	-1.64548e-10	-6.91415e-11
		0.00666	-1.67717e-10	-9.48347e-11	-1.47904e-10																0.00666	-1.67717e-10	-1.62709e-10	-6.70177e-11
		0.00668	-1.66147e-10	-9.3149e-11	-1.46492e-10																0.00668	-1.66147e-10	-1.60881e-10	-6.4927e-11
		0.0067	-1.64609e-10	-9.14964e-11	-1.45073e-10																0.0067	-1.64609e-10	-1.59065e-10	-6.28738e-11
		0.00672	-1.63103e-10	-8.98798e-11	-1.43651e-10																0.00672	-1.63103e-10	-1.57268e-10	-6.08623e-11
		0.00674	-1.61631e-10	-8.8302e-11	-1.42228e-10																0.00674	-1.61631e-10	-1.55491e-10	-5.88964e-11
		0.00676	-1.60196e-10	-8.6766e-11	-1.40809e-10																0.00676	-1.60196e-10	-1.53738e-10	-5.69798e-11
		0.00678	-1.58799e-10	-8.52742e-11	-1.39395e-10																0.00678	-1.58799e-10	-1.52013e-10	-5.51162e-11
		0.0068	-1.57442e-10	-8.38294e-11	-1.3799e-10																0.0068	-1.57442e-10	-1.5032e-10	-5.33089e-11
		0.00682	-1.56125e-10	-8.24338e-11	-1.36596e-10																0.00682	-1.56125e-10	-1.4866e-10	-5.15609e-11
		0.00684	-1.54849e-10	-8.10899e-11	-1.35217e-10																0.00684	-1.54849e-10	-1.47039e-10	-4.98751e-11
		0.00686	-1.53616e-10	-7.97997e-11	-1.33854e-10																0.00686	-1.53616e-10	-1.45457e-10	-4.82539e-11
		0.00688	-1.52427e-10	-7.8565e-11	-1.32512e-10																0.00688	-1.52427e-10	-1.43919e-10	-4.66997e-11
		0.0069	-1.51281e-10	-7.73877e-11	-1.31193e-10																0.0069	-1.51281e-10	-1.42427e-10	-4.52146e-11
		0.00692	-1.50179e-10	-7.6269e-11	-1.29899e-10																0.00692	-1.50179e-10	-1.40984e-10	-4.38004e-11
		0.00694	-1.49122e-10	-7.52102e-11	-1.28633e-10																0.00694	-1.49122e-10	-1.39591e-10	-4.24586e-11
		0.00696	-1.48109e-10	-7.42121e-11	-1.27397e-10																0.00696	-1.48109e-10	-1.38251e-10	-4.11907e-11
		0.00698	-1.47141e-10	-7.32756e-11	-1.26194e-10																0.00698	-1.47141e-10	-1.36966e-10	-3.99978e-11
		0.007	-1.46217e-10	-7.2401e-11	-1.25025e-10																0.007	-1.46217e-10	-1.35737e-10	-3.88808e-11
		0.00702	-1.45338e-10	-7.15887e-11	-1.23893e-10																0.00702	-1.45338e-10	-1.34566e-10	-3.78401e-11
		0.00704	-1.44503e-10	-7.08386e-11	-1.22799e-10																0.00704	-1.44503e-10	-1.33454e-10	-3.68759e-11
		0.00706	-1.43711e-10	-7.01504e-11	-1.21745e-10																0.00706	-1.43711e-10	-1.32402e-10	-3.59881e-11
		0.00708	-1.42962e-10	-6.95237e-11	-1.20732e-10																0.00708	-1.42962e-10	-1.3141e-10	-3.51762e-11
		0.0071	-1.42255e-10	-6.89576e-11	-1.19761e-10																0.0071	-1.42255e-10	-1.3048e-10	-3.44397e-11
		0.00712	-1.4159e-10	-6.84511e-11	-1.18835e-10																0.00712	-1.4159e-10	-1.29612e-10	-3.37774e-11
		0.00714	-1.40965e-10	-6.80027e-11	-1.17954e-10																0.00714	-1.40965e-10	-1.28805e-10	-3.31881e-11
		0.00716	-1.40379e-10	-6.76108e-11	-1.17119e-10																0.00716	-1.40379e-10	-1.28059e-10	-3.26698e-11
		0.00718	-1.39832e-10	-6.72729e-11	-1.16331e-10																0.00718	-1.39832e-10	-1.27373e-10	-3.22201e-11
		0.0072	-1.39323e-10	-6.69866e-11	-1.1559e-10																0.0072	-1.39323e-10	-1.26746e-10	-3.18358e-11
		0.00722	-1.38851e-10	-6.67486e-11	-1.14896e-10																0.00722	-1.38851e-10	-1.26175e-10	-3.15134e-11
		0.00724	-1.38415e-10	-6.65557e-11	-1.14248e-10																0.00724	-1.38415e-10	-1.25659e-10	-3.12488e-11
		0.00726	-1.38014e-10	-6.64044e-11	-1.13646e-10																0.00726	-1.38014e-10	-1.25195e-10	-3.10378e-11
		0.00728	-1.37647e-10	-6.62911e-11	-1.13087e-10																0.00728	-1.37647e-10	-1.24779e-10	-3.0876e-11
		0.0073	-1.37314e-10	-6.62123e-11	-1.1257e-10																0.0073	-1.37314e-10	-1.24409e-10	-3.07591e-11
		0.00732	-1.37013e-10	-6.61645e-11	-1.12093e-10																0.00732	-1.37013e-10	-1.24082e-10	-3.0683e-11
		0.00734	-1.36743e-10	-6.61447e-11	-1.11654e-10																0.00734	-1.36743e-10	-1.23795e-10	-3.06438e-11
		0.00736	-1.36503e-10	-6.61499e-11	-1.11249e-10																0.00736	-1.36503e-10	-1.23544e-10	-3.06377e-11
		0.00738	-1.36292e-10	-6.61774e-11	-1.10878e-10																0.00738	-1.36292e-10	-1.23328e-10	-3.06614e-11
		0.0074	-1.36108e-10	-6.62247e-11	-1.10538e-10																0.0074	-1.36108e-10	-1.23144e-10	-3.07117e-11
		0.00742	-1.35951e-10	-6.62896e-11	-1.10227e-10																0.00742	-1.35951e-10	-1.22989e-10	-3.07856e-11
		0.00744	-1.35818e-10	-6.637e-11	-1.09943e-10																0.00744	-1.35818e-10	-1.22861e-10	-3.08807e-11
		0.00746	-1.35709e-10	-6.64639e-11	-1.09684e-10																0.00746	-1.35709e-10	-1.22758e-10	-3.09945e-11
		0.00748	-1.35622e-10	-6.65696e-11	-1.09447e-10																0.00748	-1.35622e-10	-1.22678e-10	-3.11251e-11
		0.0075	-1.35557e-10	-6.66856e-11	-1.09232e-10																0.0075	-1.35557e-10	-1.22619e-10	-3.12706e-11
		0.00752	-1.35511e-10	-6.68104e-11	-1.09037e-10																0.00752	-1.35511e-10	-1.2258e-10	-3.14294e-11
		0.00754	-1.35485e-10	-6.69429e-11	-1.0886e-10																0.00754	-1.35485e-10	-1.22559e-10	-3.16001e-11
		0.00756	-1.35476e-10	-6.70819e-11	-1.087e-10																0.00756	-1.35476e-10	-1.22554e-10	-3.17815e-11
		0.00758	-1.35484e-10	-6.72266e-11	-1.08556e-10																0.00758	-1.35484e-10	-1.22564e-10	-3.19724e-11
		0.0076	-1.35509e-10	-6.73762e-11	-1.08426e-10																0.0076	-1.35509e-10	-1.22588e-10	-3.21719e-11
		0.00762	-1.35548e-10	-6.753e-11	-1.0831e-10																0.00762	-1.35548e-10	-1.22624e-10	-3.2379e-11
		0.00764	-1.35602e-10	-6.76874e-11	-1.08207e-10																0.00764	-1.35602e-10	-1.22672e-10	-3.25929e-11
		0.00766	-1.3567e-10	-6.78478e-11	-1.08115e-10																0.00766	-1.3567e-10	-1.2273e-10	-3.28131e-11
		0.00768	-1.3575e-10	-6.80107e-11	-1.08035e-10																0.00768	-1.3575e-10	-1.22797e-10	-3.30388e-11
		0.0077	-1.35843e-10	-6.81756e-11	-1.07965e-10																0.0077	-1.35843e-10	-1.22873e-10	-3.32695e-11
		0.00772	-1.35947e-10	-6.83421e-11	-1.07905e-10																0.00772	-1.35947e-10	-1.22956e-10	-3.35046e-11
		0.00774	-1.36062e-10	-6.85099e-11	-1.07853e-10																0.00774	-1.36062e-10	-1.23046e-10	-3.37436e-11
		0.00776	-1.36188e-10	-6.86787e-11	-1.07811e-10																0.00776	-1.36188e-10	-1.23143e-10	-3.3986e-11
		0.00778	-1.36322e-10	-6.88482e-11	-1.07776e-10																0.00778	-1.36322e-10	-1.23244e-10	-3.42314e-11
		0.0078	-1.36466e-10	-6.90183e-11	-1.07748e-10																0.0078	-1.36466e-10	-1.23351e-10	-3.44794e-11
		0.00782	-1.36617e-10	-6.91888e-11	-1.07726e-10																0.00782	-1.36617e-10	-1.23462e-10	-3.47296e-11
		0.00784	-1.36776e-10	-6.93595e-11	-1.0771e-10																0.00784	-1.36776e-10	-1.23576e-10	-3.49817e-11
		0.00786	-1.36941e-10	-6.95303e-11	-1.077e-10																0.00786	-1.36941e-10	-1.23693e-10	-3.52355e-11
		0.00788	-1.37113e-10	-6.97012e-11	-1.07694e-10																0.00788	-1.37113e-10	-1.23812e-10	-3.54907e-11
		0.0079	-1.3729e-10	-6.98719e-11	-1.07694e-10																0.0079	-1.3729e-10	-1.23933e-10	-3.57471e-11
		0.00792	-1.37471e-10	-7.00424e-11	-1.07697e-10																0.00792	-1.37471e-10	-1.24056e-10	-3.60044e-11
		0.00794	-1.37657e-10	-7.02126e-11	-1.07705e-10																0.00794	-1.37657e-10	-1.2418e-10	-3.62623e-11
		0.00796	-1.37847e-10	-7.03824e-11	-1.07716e-10																0.00796	-1.37847e-10	-1.24304e-10	-3.65207e-11
		0.00798	-1.38041e-10	-7.05518e-11	-1.0773e-10																0.00798	-1.38041e-10	-1.24428e-10	-3.67795e-11
		0.008	-1.38237e-10	-7.07207e-11	-1.07748e-10																0.008	-1.38237e-10	-1.24553e-10	-3.70386e-11
		0.00802	-1.38436e-10	-7.08893e-11	-1.07768e-10																0.00802	-1.38436e-10	-1.24677e-10	-3.72982e-11
		0.00804	-1.38637e-10	-7.10575e-11	-1.07791e-10																0.00804	-1.38637e-10	-1.248e-10	-3.75581e-11
		0.00806	-1.38841e-10	-7.12254e-11	-1.07817e-10																0.00806	-1.38841e-10	-1.24923e-10	-3.78186e-11
		0.00808	-1.39047e-10	-7.13929e-11	-1.07845e-10																0.00808	-1.39047e-10	-1.25046e-10	-3.80795e-11
		0.0081	-1.39255e-10	-7.15601e-11	-1.07875e-10																0.0081	-1.39255e-10	-1.25167e-10	-3.83409e-11
		0.00812	-1.39465e-10	-7.17269e-11	-1.07907e-10																0.00812	-1.39465e-10	-1.25288e-10	-3.86026e-11
		0.00814	-1.39676e-10	-7.18931e-11	-1.0794e-10																0.00814	-1.39676e-10	-1.25409e-10	-3.88645e-11
		0.00816	-1.39888e-10	-7.20586e-11	-1.07975e-10																0.00816	-1.39888e-10	-1.25528e-10	-3.91265e-11
		0.00818	-1.40101e-10	-7.22234e-11	-1.08012e-10																0.00818	-1.40101e-10	-1.25646e-10	-3.93884e-11
		0.0082	-1.40315e-10	-7.23872e-11	-1.08049e-10																0.0082	-1.40315e-10	-1.25764e-10	-3.96501e-11
		0.00822	-1.4053e-10	-7.25498e-11	-1.08087e-10																0.00822	-1.4053e-10	-1.2588e-10	-3.99115e-11
		0.00824	-1.40745e-10	-7.27112e-11	-1.08126e-10																0.00824	-1.40745e-10	-1.25995e-10	-4.01722e-11
		0.00826	-1.4096e-10	-7.28712e-11	-1.08164e-10																0.00826	-1.4096e-10	-1.26109e-10	-4.04323e-11
		0.00828	-1.41175e-10	-7.30296e-11	-1.08203e-10																0.00828	-1.41175e-10	-1.26221e-10	-4.06914e-11
		0.0083	-1.4139e-10	-7.31865e-11	-1.08241e-10																0.0083	-1.4139e-10	-1.26332e-10	-4.09493e-11
		0.00832	-1.41605e-10	-7.33415e-11	-1.08279e-10																0.00832	-1.41605e-10	-1.26441e-10	-4.12061e-11
		0.00834	-1.4182e-10	-7.34947e-11	-1.08316e-10																0.00834	-1.4182e-10	-1.26549e-10	-4.14614e-11
		0.00836	-1.42033e-10	-7.36458e-11	-1.08353e-10																0.00836	-1.42033e-10	-1.26655e-10	-4.17153e-11
		0.00838	-1.42245e-10	-7.3795e-11	-1.08388e-10																0.00838	-1.42245e-10	-1.26759e-10	-4.19676e-11
		0.0084	-1.42457e-10	-7.39421e-11	-1.08422e-10																0.0084	-1.42457e-10	-1.2686e-10	-4.22182e-11
		0.00842	-1.42667e-10	-7.40873e-11	-1.08455e-10																0.00842	-1.42667e-10	-1.2696e-10	-4.2467e-11
		0.00844	-1.42876e-10	-7.42307e-11	-1.08487e-10																0.00844	-1.42876e-10	-1.27058e-10	-4.27139e-11
		0.00846	-1.43084e-10	-7.43724e-11	-1.08519e-10																0.00846	-1.43084e-10	-1.27154e-10	-4.29588e-11
		0.00848	-1.43291e-10	-7.45127e-11	-1.08549e-10																0.00848	-1.43291e-10	-1.27247e-10	-4.32017e-11
		0.0085	-1.43495e-10	-7.46514e-11	-1.08578e-10																0.0085	-1.43495e-10	-1.27339e-10	-4.34425e-11
		0.00852	-1.43699e-10	-7.47888e-11	-1.08606e-10																0.00852	-1.43699e-10	-1.27429e-10	-4.36813e-11
		0.00854	-1.43901e-10	-7.49249e-11	-1.08634e-10																0.00854	-1.43901e-10	-1.27517e-10	-4.39182e-11
		0.00856	-1.44101e-10	-7.50598e-11	-1.08662e-10																0.00856	-1.44101e-10	-1.27603e-10	-4.41532e-11
		0.00858	-1.443e-10	-7.51936e-11	-1.08689e-10																0.00858	-1.443e-10	-1.27687e-10	-4.43863e-11
		0.0086	-1.44499e-10	-7.53265e-11	-1.08716e-10																0.0086	-1.44499e-10	-1.27771e-10	-4.46174e-11
		0.00862	-1.44696e-10	-7.54586e-11	-1.08743e-10																0.00862	-1.44696e-10	-1.27853e-10	-4.48464e-11
		0.00864	-1.44892e-10	-7.55902e-11	-1.0877e-10																0.00864	-1.44892e-10	-1.27934e-10	-4.50732e-11
		0.00866	-1.45088e-10	-7.57214e-11	-1.08797e-10																0.00866	-1.45088e-10	-1.28014e-10	-4.52976e-11
		0.00868	-1.45283e-10	-7.58523e-11	-1.08824e-10																0.00868	-1.45283e-10	-1.28094e-10	-4.55194e-11
		0.0087	-1.45478e-10	-7.5983e-11	-1.08851e-10																0.0087	-1.45478e-10	-1.28174e-10	-4.57384e-11
		0.00872	-1.45671e-10	-7.61137e-11	-1.08878e-10																0.00872	-1.45671e-10	-1.28253e-10	-4.59546e-11
		0.00874	-1.45864e-10	-7.62444e-11	-1.08905e-10																0.00874	-1.45864e-10	-1.28332e-10	-4.61678e-11
		0.00876	-1.46057e-10	-7.63753e-11	-1.08933e-10																0.00876	-1.46057e-10	-1.28412e-10	-4.6378e-11
		0.00878	-1.46248e-10	-7.65063e-11	-1.0896e-10																0.00878	-1.46248e-10	-1.28491e-10	-4.6585e-11
		0.0088	-1.46439e-10	-7.66376e-11	-1.08987e-10																0.0088	-1.46439e-10	-1.28571e-10	-4.67886e-11
		0.00882	-1.46629e-10	-7.67689e-11	-1.09014e-10																0.00882	-1.46629e-10	-1.28652e-10	-4.6989e-11
		0.00884	-1.46818e-10	-7.69005e-11	-1.09041e-10																0.00884	-1.46818e-10	-1.28733e-10	-4.71859e-11
		0.00886	-1.47007e-10	-7.70322e-11	-1.09068e-10																0.00886	-1.47007e-10	-1.28815e-10	-4.73793e-11
		0.00888	-1.47195e-10	-7.71642e-11	-1.09095e-10																0.00888	-1.47195e-10	-1.28898e-10	-4.75692e-11
		0.0089	-1.47384e-10	-7.72963e-11	-1.09122e-10																0.0089	-1.47384e-10	-1.28981e-10	-4.77556e-11
		0.00892	-1.47572e-10	-7.74288e-11	-1.09149e-10																0.00892	-1.47572e-10	-1.29065e-10	-4.79385e-11
		0.00894	-1.47759e-10	-7.75615e-11	-1.09176e-10																0.00894	-1.47759e-10	-1.2915e-10	-4.81177e-11
		0.00896	-1.47946e-10	-7.76946e-11	-1.09203e-10																0.00896	-1.47946e-10	-1.29236e-10	-4.82934e-11
		0.00898	-1.48133e-10	-7.7828e-11	-1.0923e-10																0.00898	-1.48133e-10	-1.29323e-10	-4.84655e-11
		0.009	-1.48319e-10	-7.79616e-11	-1.09257e-10																0.009	-1.48319e-10	-1.29411e-10	-4.86341e-11
		0.00902	-1.48505e-10	-7.80954e-11	-1.09285e-10																0.00902	-1.48505e-10	-1.29501e-10	-4.87993e-11
		0.00904	-1.4869e-10	-7.82294e-11	-1.09313e-10																0.00904	-1.4869e-10	-1.29592e-10	-4.89614e-11
		0.00906	-1.48874e-10	-7.83633e-11	-1.09342e-10																0.00906	-1.48874e-10	-1.29684e-10	-4.91205e-11
		0.00908	-1.49058e-10	-7.84971e-11	-1.09372e-10																0.00908	-1.49058e-10	-1.29776e-10	-4.92768e-11
		0.0091	-1.49242e-10	-7.86309e-11	-1.09403e-10																0.0091	-1.49242e-10	-1.2987e-10	-4.94305e-11
		0.00912	-1.49425e-10	-7.87645e-11	-1.09435e-10																0.00912	-1.49425e-10	-1.29964e-10	-4.95817e-11
		0.00914	-1.49608e-10	-7.8898e-11	-1.09468e-10																0.00914	-1.49608e-10	-1.30058e-10	-4.97305e-11
		0.00916	-1.49792e-10	-7.90314e-11	-1.09502e-10																0.00916	-1.49792e-10	-1.30153e-10	-4.98769e-11
		0.00918	-1.49975e-10	-7.91645e-11	-1.09538e-10																0.00918	-1.49975e-10	-1.30248e-10	-5.00209e-11
		0.0092	-1.50159e-10	-7.9297e-11	-1.09574e-10																0.0092	-1.50159e-10	-1.30344e-10	-5.01627e-11
		0.00922	-1.50343e-10	-7.9429e-11	-1.09612e-10																0.00922	-1.50343e-10	-1.3044e-10	-5.03022e-11
		0.00924	-1.50527e-10	-7.95599e-11	-1.09651e-10																0.00924	-1.50527e-10	-1.30535e-10	-5.04396e-11
		0.00926	-1.50711e-10	-7.96897e-11	-1.09692e-10																0.00926	-1.50711e-10	-1.30631e-10	-5.05751e-11
		0.00928	-1.50896e-10	-7.98181e-11	-1.09733e-10																0.00928	-1.50896e-10	-1.30727e-10	-5.07088e-11
		0.0093	-1.51082e-10	-7.99449e-11	-1.09777e-10																0.0093	-1.51082e-10	-1.30822e-10	-5.0841e-11
		0.00932	-1.51268e-10	-8.007e-11	-1.09821e-10																0.00932	-1.51268e-10	-1.30917e-10	-5.09719e-11
		0.00934	-1.51454e-10	-8.01933e-11	-1.09868e-10																0.00934	-1.51454e-10	-1.31012e-10	-5.11016e-11
		0.00936	-1.51641e-10	-8.03148e-11	-1.09916e-10																0.00936	-1.51641e-10	-1.31106e-10	-5.12303e-11
		0.00938	-1.51828e-10	-8.04345e-11	-1.09965e-10																0.00938	-1.51828e-10	-1.31199e-10	-5.13583e-11
		0.0094	-1.52016e-10	-8.05521e-11	-1.10017e-10																0.0094	-1.52016e-10	-1.31292e-10	-5.14858e-11
		0.00942	-1.52204e-10	-8.06678e-11	-1.10069e-10																0.00942	-1.52204e-10	-1.31383e-10	-5.16129e-11
		0.00944	-1.52392e-10	-8.07815e-11	-1.10123e-10																0.00944	-1.52392e-10	-1.31474e-10	-5.17399e-11
		0.00946	-1.5258e-10	-8.08932e-11	-1.10178e-10																0.00946	-1.5258e-10	-1.31565e-10	-5.1867e-11
		0.00948	-1.52767e-10	-8.10029e-11	-1.10234e-10																0.00948	-1.52767e-10	-1.31654e-10	-5.19944e-11
		0.0095	-1.52955e-10	-8.11106e-11	-1.10291e-10																0.0095	-1.52955e-10	-1.31743e-10	-5.21221e-11
		0.00952	-1.53141e-10	-8.12164e-11	-1.1035e-10																0.00952	-1.53141e-10	-1.3183e-10	-5.22502e-11
		0.00954	-1.53327e-10	-8.13203e-11	-1.10409e-10																0.00954	-1.53327e-10	-1.31917e-10	-5.23788e-11
		0.00956	-1.53512e-10	-8.14223e-11	-1.10469e-10																0.00956	-1.53512e-10	-1.32003e-10	-5.25077e-11
		0.00958	-1.53696e-10	-8.15224e-11	-1.1053e-10																0.00958	-1.53696e-10	-1.32088e-10	-5.26368e-11
		0.0096	-1.53879e-10	-8.16206e-11	-1.10592e-10																0.0096	-1.53879e-10	-1.32171e-10	-5.2766e-11
		0.00962	-1.5406e-10	-8.17167e-11	-1.10655e-10																0.00962	-1.5406e-10	-1.32253e-10	-5.2895e-11
		0.00964	-1.54239e-10	-8.18109e-11	-1.10719e-10																0.00964	-1.54239e-10	-1.32334e-10	-5.30235e-11
		0.00966	-1.54416e-10	-8.19032e-11	-1.10784e-10																0.00966	-1.54416e-10	-1.32414e-10	-5.31515e-11
		0.00968	-1.54591e-10	-8.19935e-11	-1.10849e-10																0.00968	-1.54591e-10	-1.32492e-10	-5.32789e-11
		0.0097	-1.54764e-10	-8.2082e-11	-1.10915e-10																0.0097	-1.54764e-10	-1.32568e-10	-5.34055e-11
		0.00972	-1.54934e-10	-8.21686e-11	-1.10981e-10																0.00972	-1.54934e-10	-1.32644e-10	-5.35314e-11
		0.00974	-1.55103e-10	-8.22536e-11	-1.11047e-10																0.00974	-1.55103e-10	-1.32717e-10	-5.36568e-11
		0.00976	-1.55269e-10	-8.23369e-11	-1.11114e-10																0.00976	-1.55269e-10	-1.32789e-10	-5.37817e-11
		0.00978	-1.55433e-10	-8.24189e-11	-1.11181e-10																0.00978	-1.55433e-10	-1.3286e-10	-5.3906e-11
		0.0098	-1.55594e-10	-8.24995e-11	-1.11249e-10																0.0098	-1.55594e-10	-1.3293e-10	-5.40298e-11
		0.00982	-1.55754e-10	-8.25789e-11	-1.11318e-10																0.00982	-1.55754e-10	-1.32998e-10	-5.41532e-11
		0.00984	-1.55912e-10	-8.26573e-11	-1.11386e-10																0.00984	-1.55912e-10	-1.33065e-10	-5.42761e-11
		0.00986	-1.56068e-10	-8.27349e-11	-1.11456e-10																0.00986	-1.56068e-10	-1.33131e-10	-5.43986e-11
		0.00988	-1.56222e-10	-8.28118e-11	-1.11526e-10																0.00988	-1.56222e-10	-1.33196e-10	-5.45208e-11
		0.0099	-1.56374e-10	-8.28879e-11	-1.11597e-10																0.0099	-1.56374e-10	-1.3326e-10	-5.46426e-11
		0.00992	-1.56524e-10	-8.29636e-11	-1.11668e-10																0.00992	-1.56524e-10	-1.33323e-10	-5.47642e-11
		0.00994	-1.56672e-10	-8.30389e-11	-1.11741e-10																0.00994	-1.56672e-10	-1.33386e-10	-5.48856e-11
		0.00996	-1.56819e-10	-8.3114e-11	-1.11814e-10																0.00996	-1.56819e-10	-1.33448e-10	-5.50069e-11
		0.00998	-1.56963e-10	-8.3189e-11	-1.11887e-10																0.00998	-1.56963e-10	-1.33511e-10	-5.51278e-11
		0.01	-1.57105e-10	-8.32639e-11	-1.11961e-10																0.01	-1.57105e-10	-1.33573e-10	-5.52484e-11
		0.01002	-1.57245e-10	-8.33389e-11	-1.12035e-10																0.01002	-1.57245e-10	-1.33635e-10	-5.53684e-11
		0.01004	-1.57383e-10	-8.34139e-11	-1.1211e-10																0.01004	-1.57383e-10	-1.33697e-10	-5.54878e-11
		0.01006	-1.57519e-10	-8.34891e-11	-1.12185e-10																0.01006	-1.57519e-10	-1.33758e-10	-5.56064e-11
		0.01008	-1.57652e-10	-8.35644e-11	-1.1226e-10																0.01008	-1.57652e-10	-1.3382e-10	-5.57243e-11
		0.0101	-1.57782e-10	-8.36399e-11	-1.12334e-10																0.0101	-1.57782e-10	-1.33883e-10	-5.58413e-11
		0.01012	-1.5791e-10	-8.37157e-11	-1.12409e-10																0.01012	-1.5791e-10	-1.33945e-10	-5.59574e-11
		0.01014	-1.58035e-10	-8.37918e-11	-1.12484e-10																0.01014	-1.58035e-10	-1.34008e-10	-5.60726e-11
		0.01016	-1.58157e-10	-8.38683e-11	-1.12558e-10																0.01016	-1.58157e-10	-1.34071e-10	-5.61868e-11
		0.01018	-1.58276e-10	-8.39452e-11	-1.12633e-10																0.01018	-1.58276e-10	-1.34134e-10	-5.62999e-11
		0.0102	-1.58393e-10	-8.40225e-11	-1.12707e-10																0.0102	-1.58393e-10	-1.34198e-10	-5.64117e-11
		0.01022	-1.58507e-10	-8.41002e-11	-1.12782e-10																0.01022	-1.58507e-10	-1.34262e-10	-5.65222e-11
		0.01024	-1.58618e-10	-8.41782e-11	-1.12857e-10																0.01024	-1.58618e-10	-1.34327e-10	-5.66312e-11
		0.01026	-1.58727e-10	-8.42564e-11	-1.12933e-10																0.01026	-1.58727e-10	-1.34393e-10	-5.67385e-11
		0.01028	-1.58834e-10	-8.43348e-11	-1.13008e-10																0.01028	-1.58834e-10	-1.34459e-10	-5.6844e-11
		0.0103	-1.58938e-10	-8.44134e-11	-1.13085e-10																0.0103	-1.58938e-10	-1.34526e-10	-5.69476e-11
		0.01032	-1.5904e-10	-8.44922e-11	-1.13161e-10																0.01032	-1.5904e-10	-1.34593e-10	-5.70492e-11
		0.01034	-1.59141e-10	-8.45713e-11	-1.13238e-10																0.01034	-1.59141e-10	-1.34662e-10	-5.71486e-11
		0.01036	-1.59239e-10	-8.46507e-11	-1.13315e-10																0.01036	-1.59239e-10	-1.3473e-10	-5.7246e-11
		0.01038	-1.59335e-10	-8.47304e-11	-1.13392e-10																0.01038	-1.59335e-10	-1.348e-10	-5.73413e-11
		0.0104	-1.5943e-10	-8.48102e-11	-1.13469e-10																0.0104	-1.5943e-10	-1.3487e-10	-5.74346e-11
		0.01042	-1.59522e-10	-8.48902e-11	-1.13545e-10																0.01042	-1.59522e-10	-1.3494e-10	-5.75258e-11
		0.01044	-1.59612e-10	-8.497e-11	-1.13622e-10																0.01044	-1.59612e-10	-1.35011e-10	-5.76149e-11
		0.01046	-1.59701e-10	-8.50497e-11	-1.13698e-10																0.01046	-1.59701e-10	-1.35083e-10	-5.77022e-11
		0.01048	-1.59787e-10	-8.5129e-11	-1.13773e-10																0.01048	-1.59787e-10	-1.35155e-10	-5.77875e-11
		0.0105	-1.59872e-10	-8.52078e-11	-1.13848e-10																0.0105	-1.59872e-10	-1.35228e-10	-5.7871e-11
		0.01052	-1.59954e-10	-8.52862e-11	-1.13922e-10																0.01052	-1.59954e-10	-1.35301e-10	-5.79526e-11
		0.01054	-1.60034e-10	-8.5364e-11	-1.13996e-10																0.01054	-1.60034e-10	-1.35375e-10	-5.80323e-11
		0.01056	-1.60112e-10	-8.54411e-11	-1.14068e-10																0.01056	-1.60112e-10	-1.35449e-10	-5.81102e-11
		0.01058	-1.60187e-10	-8.55175e-11	-1.14139e-10																0.01058	-1.60187e-10	-1.35524e-10	-5.81864e-11
		0.0106	-1.6026e-10	-8.5593e-11	-1.14208e-10																0.0106	-1.6026e-10	-1.356e-10	-5.82611e-11
		0.01062	-1.60329e-10	-8.56675e-11	-1.14277e-10																0.01062	-1.60329e-10	-1.35675e-10	-5.83344e-11
		0.01064	-1.60396e-10	-8.5741e-11	-1.14344e-10																0.01064	-1.60396e-10	-1.35752e-10	-5.84066e-11
		0.01066	-1.6046e-10	-8.58135e-11	-1.1441e-10																0.01066	-1.6046e-10	-1.35828e-10	-5.84777e-11
		0.01068	-1.60522e-10	-8.58849e-11	-1.14475e-10																0.01068	-1.60522e-10	-1.35905e-10	-5.85482e-11
		0.0107	-1.6058e-10	-8.59552e-11	-1.14538e-10																0.0107	-1.6058e-10	-1.35981e-10	-5.86179e-11
		0.01072	-1.60637e-10	-8.60245e-11	-1.14601e-10																0.01072	-1.60637e-10	-1.36058e-10	-5.86872e-11
		0.01074	-1.60691e-10	-8.60928e-11	-1.14662e-10																0.01074	-1.60691e-10	-1.36134e-10	-5.8756e-11
		0.01076	-1.60742e-10	-8.61601e-11	-1.14723e-10																0.01076	-1.60742e-10	-1.36211e-10	-5.88246e-11
		0.01078	-1.60792e-10	-8.62263e-11	-1.14782e-10																0.01078	-1.60792e-10	-1.36287e-10	-5.88931e-11
		0.0108	-1.60839e-10	-8.62915e-11	-1.14841e-10																0.0108	-1.60839e-10	-1.36364e-10	-5.89615e-11
		0.01082	-1.60885e-10	-8.63559e-11	-1.14899e-10																0.01082	-1.60885e-10	-1.3644e-10	-5.90299e-11
		0.01084	-1.60929e-10	-8.64194e-11	-1.14956e-10																0.01084	-1.60929e-10	-1.36516e-10	-5.90984e-11
		0.01086	-1.60971e-10	-8.6482e-11	-1.15012e-10																0.01086	-1.60971e-10	-1.36592e-10	-5.91672e-11
		0.01088	-1.61011e-10	-8.65439e-11	-1.15068e-10																0.01088	-1.61011e-10	-1.36667e-10	-5.92363e-11
		0.0109	-1.6105e-10	-8.66049e-11	-1.15123e-10																0.0109	-1.6105e-10	-1.36743e-10	-5.93056e-11
		0.01092	-1.61088e-10	-8.66649e-11	-1.15177e-10																0.01092	-1.61088e-10	-1.36818e-10	-5.93753e-11
		0.01094	-1.61126e-10	-8.67237e-11	-1.1523e-10																0.01094	-1.61126e-10	-1.36892e-10	-5.94454e-11
		0.01096	-1.61162e-10	-8.67812e-11	-1.15283e-10																0.01096	-1.61162e-10	-1.36966e-10	-5.95159e-11
		0.01098	-1.61199e-10	-8.6837e-11	-1.15334e-10																0.01098	-1.61199e-10	-1.37039e-10	-5.95868e-11
		0.011	-1.61235e-10	-8.68911e-11	-1.15386e-10																0.011	-1.61235e-10	-1.37111e-10	-5.96579e-11
		0.01102	-1.61272e-10	-8.69432e-11	-1.15436e-10																0.01102	-1.61272e-10	-1.37182e-10	-5.97293e-11
		0.01104	-1.61309e-10	-8.69932e-11	-1.15486e-10																0.01104	-1.61309e-10	-1.37251e-10	-5.98007e-11
		0.01106	-1.61347e-10	-8.70411e-11	-1.15536e-10																0.01106	-1.61347e-10	-1.3732e-10	-5.98723e-11
		0.01108	-1.61387e-10	-8.70868e-11	-1.15584e-10																0.01108	-1.61387e-10	-1.37388e-10	-5.99436e-11
		0.0111	-1.61427e-10	-8.71303e-11	-1.15632e-10																0.0111	-1.61427e-10	-1.37455e-10	-6.00148e-11
		0.01112	-1.61469e-10	-8.71716e-11	-1.1568e-10																0.01112	-1.61469e-10	-1.3752e-10	-6.00858e-11
		0.01114	-1.61513e-10	-8.72106e-11	-1.15727e-10																0.01114	-1.61513e-10	-1.37585e-10	-6.01563e-11
		0.01116	-1.61559e-10	-8.72472e-11	-1.15773e-10																0.01116	-1.61559e-10	-1.37648e-10	-6.02266e-11
		0.01118	-1.61606e-10	-8.72816e-11	-1.15819e-10																0.01118	-1.61606e-10	-1.3771e-10	-6.02966e-11
		0.0112	-1.61655e-10	-8.73136e-11	-1.15864e-10																0.0112	-1.61655e-10	-1.37771e-10	-6.03661e-11
		0.01122	-1.61707e-10	-8.73434e-11	-1.15908e-10																0.01122	-1.61707e-10	-1.37831e-10	-6.04353e-11
		0.01124	-1.6176e-10	-8.73711e-11	-1.15951e-10																0.01124	-1.6176e-10	-1.3789e-10	-6.05041e-11
		0.01126	-1.61815e-10	-8.73966e-11	-1.15994e-10																0.01126	-1.61815e-10	-1.37948e-10	-6.05726e-11
		0.01128	-1.61872e-10	-8.74203e-11	-1.16037e-10																0.01128	-1.61872e-10	-1.38005e-10	-6.06406e-11
		0.0113	-1.61932e-10	-8.74423e-11	-1.16078e-10																0.0113	-1.61932e-10	-1.38061e-10	-6.07081e-11
		0.01132	-1.61993e-10	-8.74627e-11	-1.16119e-10																0.01132	-1.61993e-10	-1.38116e-10	-6.07751e-11
		0.01134	-1.62057e-10	-8.74818e-11	-1.1616e-10																0.01134	-1.62057e-10	-1.38171e-10	-6.08415e-11
		0.01136	-1.62123e-10	-8.74998e-11	-1.16199e-10																0.01136	-1.62123e-10	-1.38225e-10	-6.09074e-11
		0.01138	-1.6219e-10	-8.7517e-11	-1.16238e-10																0.01138	-1.6219e-10	-1.38278e-10	-6.09727e-11
		0.0114	-1.6226e-10	-8.75338e-11	-1.16277e-10																0.0114	-1.6226e-10	-1.3833e-10	-6.10374e-11
		0.01142	-1.62332e-10	-8.75503e-11	-1.16314e-10																0.01142	-1.62332e-10	-1.38382e-10	-6.11015e-11
		0.01144	-1.62406e-10	-8.75668e-11	-1.16352e-10																0.01144	-1.62406e-10	-1.38434e-10	-6.1165e-11
		0.01146	-1.62482e-10	-8.75835e-11	-1.16389e-10																0.01146	-1.62482e-10	-1.38484e-10	-6.12277e-11
		0.01148	-1.6256e-10	-8.76006e-11	-1.16425e-10																0.01148	-1.6256e-10	-1.38533e-10	-6.12897e-11
		0.0115	-1.62639e-10	-8.76182e-11	-1.16462e-10																0.0115	-1.62639e-10	-1.38582e-10	-6.13508e-11
		0.01152	-1.62721e-10	-8.76362e-11	-1.16497e-10																0.01152	-1.62721e-10	-1.38629e-10	-6.14109e-11
		0.01154	-1.62804e-10	-8.76548e-11	-1.16532e-10																0.01154	-1.62804e-10	-1.38676e-10	-6.147e-11
		0.01156	-1.62889e-10	-8.7674e-11	-1.16566e-10																0.01156	-1.62889e-10	-1.38722e-10	-6.1528e-11
		0.01158	-1.62976e-10	-8.76937e-11	-1.16599e-10																0.01158	-1.62976e-10	-1.38767e-10	-6.15848e-11
		0.0116	-1.63064e-10	-8.77141e-11	-1.16631e-10																0.0116	-1.63064e-10	-1.38811e-10	-6.16404e-11
		0.01162	-1.63153e-10	-8.77352e-11	-1.16662e-10																0.01162	-1.63153e-10	-1.38854e-10	-6.16948e-11
		0.01164	-1.63244e-10	-8.77569e-11	-1.16693e-10																0.01164	-1.63244e-10	-1.38897e-10	-6.17478e-11
		0.01166	-1.63337e-10	-8.77792e-11	-1.16722e-10																0.01166	-1.63337e-10	-1.3894e-10	-6.17995e-11
		0.01168	-1.6343e-10	-8.78019e-11	-1.16751e-10																0.01168	-1.6343e-10	-1.38983e-10	-6.18499e-11
		0.0117	-1.63524e-10	-8.78251e-11	-1.16778e-10																0.0117	-1.63524e-10	-1.39026e-10	-6.18989e-11
		0.01172	-1.63619e-10	-8.78486e-11	-1.16806e-10																0.01172	-1.63619e-10	-1.39069e-10	-6.19464e-11
		0.01174	-1.63714e-10	-8.78722e-11	-1.16832e-10																0.01174	-1.63714e-10	-1.39113e-10	-6.19923e-11
		0.01176	-1.63808e-10	-8.78959e-11	-1.16858e-10																0.01176	-1.63808e-10	-1.39157e-10	-6.20364e-11
		0.01178	-1.63903e-10	-8.79196e-11	-1.16884e-10																0.01178	-1.63903e-10	-1.39201e-10	-6.20788e-11
		0.0118	-1.63996e-10	-8.7943e-11	-1.16908e-10																0.0118	-1.63996e-10	-1.39245e-10	-6.21195e-11
		0.01182	-1.64089e-10	-8.79661e-11	-1.16932e-10																0.01182	-1.64089e-10	-1.3929e-10	-6.21585e-11
		0.01184	-1.6418e-10	-8.79889e-11	-1.16956e-10																0.01184	-1.6418e-10	-1.39335e-10	-6.2196e-11
		0.01186	-1.6427e-10	-8.80113e-11	-1.16979e-10																0.01186	-1.6427e-10	-1.39381e-10	-6.2232e-11
		0.01188	-1.64358e-10	-8.80335e-11	-1.17e-10																0.01188	-1.64358e-10	-1.39427e-10	-6.22666e-11
		0.0119	-1.64445e-10	-8.80555e-11	-1.17022e-10																0.0119	-1.64445e-10	-1.39473e-10	-6.22999e-11
		0.01192	-1.64529e-10	-8.80772e-11	-1.17042e-10																0.01192	-1.64529e-10	-1.3952e-10	-6.2332e-11
		0.01194	-1.64612e-10	-8.80987e-11	-1.17062e-10																0.01194	-1.64612e-10	-1.39566e-10	-6.2363e-11
		0.01196	-1.64693e-10	-8.81199e-11	-1.17082e-10																0.01196	-1.64693e-10	-1.39613e-10	-6.23929e-11
		0.01198	-1.64771e-10	-8.81408e-11	-1.17101e-10																0.01198	-1.64771e-10	-1.39659e-10	-6.24219e-11
		0.012	-1.64847e-10	-8.81614e-11	-1.17119e-10																0.012	-1.64847e-10	-1.39706e-10	-6.245e-11
		0.01202	-1.64921e-10	-8.81816e-11	-1.17137e-10																0.01202	-1.64921e-10	-1.39753e-10	-6.24772e-11
		0.01204	-1.64993e-10	-8.82014e-11	-1.17155e-10																0.01204	-1.64993e-10	-1.39799e-10	-6.25038e-11
		0.01206	-1.65063e-10	-8.82207e-11	-1.17172e-10																0.01206	-1.65063e-10	-1.39845e-10	-6.25298e-11
		0.01208	-1.6513e-10	-8.82392e-11	-1.17189e-10																0.01208	-1.6513e-10	-1.39891e-10	-6.25553e-11
		0.0121	-1.65196e-10	-8.82571e-11	-1.17205e-10																0.0121	-1.65196e-10	-1.39937e-10	-6.25802e-11
		0.01212	-1.6526e-10	-8.82742e-11	-1.17222e-10																0.01212	-1.6526e-10	-1.39983e-10	-6.26047e-11
		0.01214	-1.65322e-10	-8.82903e-11	-1.17238e-10																0.01214	-1.65322e-10	-1.40028e-10	-6.26289e-11
		0.01216	-1.65382e-10	-8.83055e-11	-1.17255e-10																0.01216	-1.65382e-10	-1.40073e-10	-6.2653e-11
		0.01218	-1.6544e-10	-8.83197e-11	-1.17271e-10																0.01218	-1.6544e-10	-1.40117e-10	-6.26771e-11
		0.0122	-1.65497e-10	-8.83329e-11	-1.17287e-10																0.0122	-1.65497e-10	-1.40161e-10	-6.27014e-11
		0.01222	-1.65551e-10	-8.83452e-11	-1.17303e-10																0.01222	-1.65551e-10	-1.40204e-10	-6.27263e-11
		0.01224	-1.65603e-10	-8.83567e-11	-1.17319e-10																0.01224	-1.65603e-10	-1.40246e-10	-6.2752e-11
		0.01226	-1.65652e-10	-8.83674e-11	-1.17335e-10																0.01226	-1.65652e-10	-1.40288e-10	-6.27787e-11
		0.01228	-1.65699e-10	-8.83774e-11	-1.17351e-10																0.01228	-1.65699e-10	-1.40328e-10	-6.28067e-11
		0.0123	-1.65742e-10	-8.83867e-11	-1.17367e-10																0.0123	-1.65742e-10	-1.40367e-10	-6.28361e-11
		0.01232	-1.65783e-10	-8.83956e-11	-1.17383e-10																0.01232	-1.65783e-10	-1.40405e-10	-6.28671e-11
		0.01234	-1.65821e-10	-8.8404e-11	-1.17399e-10																0.01234	-1.65821e-10	-1.40442e-10	-6.28996e-11
		0.01236	-1.65856e-10	-8.84121e-11	-1.17415e-10																0.01236	-1.65856e-10	-1.40479e-10	-6.29336e-11
		0.01238	-1.65887e-10	-8.842e-11	-1.17432e-10																0.01238	-1.65887e-10	-1.40514e-10	-6.29692e-11
		0.0124	-1.65916e-10	-8.84279e-11	-1.17448e-10																0.0124	-1.65916e-10	-1.40549e-10	-6.30062e-11
		0.01242	-1.65941e-10	-8.84359e-11	-1.17466e-10																0.01242	-1.65941e-10	-1.40584e-10	-6.30447e-11
		0.01244	-1.65963e-10	-8.8444e-11	-1.17483e-10																0.01244	-1.65963e-10	-1.40618e-10	-6.30846e-11
		0.01246	-1.65983e-10	-8.84526e-11	-1.17501e-10																0.01246	-1.65983e-10	-1.40652e-10	-6.31258e-11
		0.01248	-1.65999e-10	-8.84615e-11	-1.17519e-10																0.01248	-1.65999e-10	-1.40685e-10	-6.31682e-11
		0.0125	-1.66013e-10	-8.84708e-11	-1.17538e-10																0.0125	-1.66013e-10	-1.40718e-10	-6.32118e-11
		0.01252	-1.66024e-10	-8.84807e-11	-1.17557e-10																0.01252	-1.66024e-10	-1.4075e-10	-6.32566e-11
		0.01254	-1.66032e-10	-8.8491e-11	-1.17578e-10																0.01254	-1.66032e-10	-1.40782e-10	-6.33024e-11
		0.01256	-1.66039e-10	-8.85019e-11	-1.17598e-10																0.01256	-1.66039e-10	-1.40813e-10	-6.33491e-11
		0.01258	-1.66043e-10	-8.85133e-11	-1.1762e-10																0.01258	-1.66043e-10	-1.40844e-10	-6.33965e-11
		0.0126	-1.66046e-10	-8.85252e-11	-1.17643e-10																0.0126	-1.66046e-10	-1.40873e-10	-6.34445e-11
		0.01262	-1.66047e-10	-8.85377e-11	-1.17667e-10																0.01262	-1.66047e-10	-1.40902e-10	-6.3493e-11
		0.01264	-1.66047e-10	-8.85508e-11	-1.17691e-10																0.01264	-1.66047e-10	-1.4093e-10	-6.35416e-11
		0.01266	-1.66045e-10	-8.85645e-11	-1.17716e-10																0.01266	-1.66045e-10	-1.40956e-10	-6.35905e-11
		0.01268	-1.66043e-10	-8.85786e-11	-1.17742e-10																0.01268	-1.66043e-10	-1.40982e-10	-6.36395e-11
		0.0127	-1.66039e-10	-8.85933e-11	-1.17768e-10																0.0127	-1.66039e-10	-1.41006e-10	-6.36887e-11
		0.01272	-1.66035e-10	-8.86087e-11	-1.17795e-10																0.01272	-1.66035e-10	-1.41028e-10	-6.37381e-11
		0.01274	-1.6603e-10	-8.86246e-11	-1.17822e-10																0.01274	-1.6603e-10	-1.41049e-10	-6.37879e-11
		0.01276	-1.66026e-10	-8.86412e-11	-1.17849e-10																0.01276	-1.66026e-10	-1.41067e-10	-6.38382e-11
		0.01278	-1.66021e-10	-8.86586e-11	-1.17876e-10																0.01278	-1.66021e-10	-1.41084e-10	-6.38893e-11
		0.0128	-1.66018e-10	-8.86768e-11	-1.17903e-10																0.0128	-1.66018e-10	-1.41099e-10	-6.39414e-11
		0.01282	-1.66015e-10	-8.86958e-11	-1.1793e-10																0.01282	-1.66015e-10	-1.41112e-10	-6.39947e-11
		0.01284	-1.66013e-10	-8.87158e-11	-1.17956e-10																0.01284	-1.66013e-10	-1.41123e-10	-6.40493e-11
		0.01286	-1.66013e-10	-8.87367e-11	-1.17983e-10																0.01286	-1.66013e-10	-1.41132e-10	-6.41055e-11
		0.01288	-1.66014e-10	-8.87586e-11	-1.18008e-10																0.01288	-1.66014e-10	-1.41139e-10	-6.41633e-11
		0.0129	-1.66016e-10	-8.87815e-11	-1.18034e-10																0.0129	-1.66016e-10	-1.41144e-10	-6.42228e-11
		0.01292	-1.66021e-10	-8.88056e-11	-1.18059e-10																0.01292	-1.66021e-10	-1.41148e-10	-6.42842e-11
		0.01294	-1.66027e-10	-8.88309e-11	-1.18083e-10																0.01294	-1.66027e-10	-1.4115e-10	-6.43474e-11
		0.01296	-1.66036e-10	-8.88576e-11	-1.18106e-10																0.01296	-1.66036e-10	-1.41151e-10	-6.44123e-11
		0.01298	-1.66046e-10	-8.88857e-11	-1.18129e-10																0.01298	-1.66046e-10	-1.4115e-10	-6.44787e-11
		0.013	-1.66058e-10	-8.89154e-11	-1.1815e-10																0.013	-1.66058e-10	-1.41148e-10	-6.45466e-11
		0.01302	-1.66071e-10	-8.89468e-11	-1.18171e-10																0.01302	-1.66071e-10	-1.41145e-10	-6.46158e-11
		0.01304	-1.66087e-10	-8.898e-11	-1.18191e-10																0.01304	-1.66087e-10	-1.41141e-10	-6.46862e-11
		0.01306	-1.66104e-10	-8.90151e-11	-1.18209e-10																0.01306	-1.66104e-10	-1.41136e-10	-6.47576e-11
		0.01308	-1.66122e-10	-8.90519e-11	-1.18227e-10																0.01308	-1.66122e-10	-1.4113e-10	-6.48301e-11
		0.0131	-1.66141e-10	-8.90906e-11	-1.18243e-10																0.0131	-1.66141e-10	-1.41123e-10	-6.49033e-11
		0.01312	-1.66162e-10	-8.91311e-11	-1.18259e-10																0.01312	-1.66162e-10	-1.41116e-10	-6.49774e-11
		0.01314	-1.66183e-10	-8.91735e-11	-1.18274e-10																0.01314	-1.66183e-10	-1.41108e-10	-6.50519e-11
		0.01316	-1.66206e-10	-8.92177e-11	-1.18287e-10																0.01316	-1.66206e-10	-1.411e-10	-6.51266e-11
		0.01318	-1.66229e-10	-8.92637e-11	-1.183e-10																0.01318	-1.66229e-10	-1.41091e-10	-6.52013e-11
		0.0132	-1.66253e-10	-8.93115e-11	-1.18312e-10																0.0132	-1.66253e-10	-1.41082e-10	-6.52757e-11
		0.01322	-1.66277e-10	-8.93611e-11	-1.18324e-10																0.01322	-1.66277e-10	-1.41073e-10	-6.53496e-11
		0.01324	-1.66303e-10	-8.94122e-11	-1.18334e-10																0.01324	-1.66303e-10	-1.41064e-10	-6.54229e-11
		0.01326	-1.66329e-10	-8.94649e-11	-1.18344e-10																0.01326	-1.66329e-10	-1.41055e-10	-6.54953e-11
		0.01328	-1.66355e-10	-8.95189e-11	-1.18353e-10																0.01328	-1.66355e-10	-1.41047e-10	-6.55671e-11
		0.0133	-1.66382e-10	-8.9574e-11	-1.18361e-10																0.0133	-1.66382e-10	-1.41038e-10	-6.5638e-11
		0.01332	-1.6641e-10	-8.96299e-11	-1.18369e-10																0.01332	-1.6641e-10	-1.41031e-10	-6.5708e-11
		0.01334	-1.66438e-10	-8.96862e-11	-1.18376e-10																0.01334	-1.66438e-10	-1.41024e-10	-6.57773e-11
		0.01336	-1.66466e-10	-8.97427e-11	-1.18383e-10																0.01336	-1.66466e-10	-1.41018e-10	-6.58457e-11
		0.01338	-1.66494e-10	-8.97988e-11	-1.1839e-10																0.01338	-1.66494e-10	-1.41012e-10	-6.59133e-11
		0.0134	-1.66522e-10	-8.98544e-11	-1.18397e-10																0.0134	-1.66522e-10	-1.41008e-10	-6.59801e-11
		0.01342	-1.66551e-10	-8.99089e-11	-1.18404e-10																0.01342	-1.66551e-10	-1.41006e-10	-6.60463e-11
		0.01344	-1.66579e-10	-8.99623e-11	-1.18412e-10																0.01344	-1.66579e-10	-1.41004e-10	-6.61119e-11
		0.01346	-1.66606e-10	-9.00141e-11	-1.1842e-10																0.01346	-1.66606e-10	-1.41004e-10	-6.61767e-11
		0.01348	-1.66633e-10	-9.00642e-11	-1.18429e-10																0.01348	-1.66633e-10	-1.41006e-10	-6.62407e-11
		0.0135	-1.66659e-10	-9.01125e-11	-1.18438e-10																0.0135	-1.66659e-10	-1.4101e-10	-6.63041e-11
		0.01352	-1.66685e-10	-9.01589e-11	-1.18449e-10																0.01352	-1.66685e-10	-1.41016e-10	-6.63666e-11
		0.01354	-1.6671e-10	-9.02032e-11	-1.18461e-10																0.01354	-1.6671e-10	-1.41024e-10	-6.64284e-11
		0.01356	-1.66735e-10	-9.02455e-11	-1.18475e-10																0.01356	-1.66735e-10	-1.41034e-10	-6.64897e-11
		0.01358	-1.6676e-10	-9.02856e-11	-1.18489e-10																0.01358	-1.6676e-10	-1.41046e-10	-6.65506e-11
		0.0136	-1.66784e-10	-9.03235e-11	-1.18505e-10																0.0136	-1.66784e-10	-1.41061e-10	-6.66112e-11
		0.01362	-1.66808e-10	-9.03591e-11	-1.18522e-10																0.01362	-1.66808e-10	-1.41079e-10	-6.66718e-11
		0.01364	-1.66831e-10	-9.03925e-11	-1.18541e-10																0.01364	-1.66831e-10	-1.41099e-10	-6.67325e-11
		0.01366	-1.66854e-10	-9.04238e-11	-1.18561e-10																0.01366	-1.66854e-10	-1.41121e-10	-6.67932e-11
		0.01368	-1.66876e-10	-9.04529e-11	-1.18583e-10																0.01368	-1.66876e-10	-1.41145e-10	-6.6854e-11
		0.0137	-1.66898e-10	-9.04801e-11	-1.18606e-10																0.0137	-1.66898e-10	-1.41171e-10	-6.69147e-11
		0.01372	-1.66919e-10	-9.05054e-11	-1.18629e-10																0.01372	-1.66919e-10	-1.41199e-10	-6.69752e-11
		0.01374	-1.6694e-10	-9.05288e-11	-1.18654e-10																0.01374	-1.6694e-10	-1.4123e-10	-6.70354e-11
		0.01376	-1.66961e-10	-9.05502e-11	-1.1868e-10																0.01376	-1.66961e-10	-1.41262e-10	-6.70953e-11
		0.01378	-1.66982e-10	-9.05697e-11	-1.18706e-10																0.01378	-1.66982e-10	-1.41296e-10	-6.71547e-11
		0.0138	-1.67001e-10	-9.05873e-11	-1.18733e-10																0.0138	-1.67001e-10	-1.41333e-10	-6.72135e-11
		0.01382	-1.67021e-10	-9.06029e-11	-1.1876e-10																0.01382	-1.67021e-10	-1.41371e-10	-6.72716e-11
		0.01384	-1.6704e-10	-9.06164e-11	-1.18788e-10																0.01384	-1.6704e-10	-1.41411e-10	-6.73288e-11
		0.01386	-1.67058e-10	-9.06278e-11	-1.18817e-10																0.01386	-1.67058e-10	-1.41452e-10	-6.73849e-11
		0.01388	-1.67077e-10	-9.06369e-11	-1.18845e-10																0.01388	-1.67077e-10	-1.41495e-10	-6.74397e-11
		0.0139	-1.67094e-10	-9.06437e-11	-1.18875e-10																0.0139	-1.67094e-10	-1.41539e-10	-6.74932e-11
		0.01392	-1.67111e-10	-9.06483e-11	-1.18904e-10																0.01392	-1.67111e-10	-1.41584e-10	-6.75452e-11
		0.01394	-1.67127e-10	-9.06507e-11	-1.18934e-10																0.01394	-1.67127e-10	-1.41631e-10	-6.75955e-11
		0.01396	-1.67142e-10	-9.06508e-11	-1.18964e-10																0.01396	-1.67142e-10	-1.41678e-10	-6.76441e-11
		0.01398	-1.67157e-10	-9.06489e-11	-1.18995e-10																0.01398	-1.67157e-10	-1.41727e-10	-6.76909e-11
		0.014	-1.6717e-10	-9.06451e-11	-1.19025e-10																0.014	-1.6717e-10	-1.41777e-10	-6.77356e-11
		0.01402	-1.67182e-10	-9.06395e-11	-1.19057e-10																0.01402	-1.67182e-10	-1.41827e-10	-6.77782e-11
		0.01404	-1.67192e-10	-9.06327e-11	-1.19088e-10																0.01404	-1.67192e-10	-1.41879e-10	-6.78186e-11
		0.01406	-1.672e-10	-9.06249e-11	-1.1912e-10																0.01406	-1.672e-10	-1.41932e-10	-6.78568e-11
		0.01408	-1.67206e-10	-9.06165e-11	-1.19153e-10																0.01408	-1.67206e-10	-1.41985e-10	-6.78928e-11
		0.0141	-1.6721e-10	-9.06078e-11	-1.19186e-10																0.0141	-1.6721e-10	-1.42039e-10	-6.79267e-11
		0.01412	-1.67213e-10	-9.05992e-11	-1.1922e-10																0.01412	-1.67213e-10	-1.42093e-10	-6.79583e-11
		0.01414	-1.67213e-10	-9.05911e-11	-1.19255e-10																0.01414	-1.67213e-10	-1.42148e-10	-6.79879e-11
		0.01416	-1.67212e-10	-9.05839e-11	-1.19289e-10																0.01416	-1.67212e-10	-1.42203e-10	-6.80152e-11
		0.01418	-1.67209e-10	-9.05779e-11	-1.19325e-10																0.01418	-1.67209e-10	-1.42258e-10	-6.80402e-11
		0.0142	-1.67204e-10	-9.05734e-11	-1.1936e-10																0.0142	-1.67204e-10	-1.42313e-10	-6.80631e-11
		0.01422	-1.67197e-10	-9.05707e-11	-1.19396e-10																0.01422	-1.67197e-10	-1.42368e-10	-6.80838e-11
		0.01424	-1.67189e-10	-9.057e-11	-1.19432e-10																0.01424	-1.67189e-10	-1.42422e-10	-6.81023e-11
		0.01426	-1.67178e-10	-9.05716e-11	-1.19468e-10																0.01426	-1.67178e-10	-1.42476e-10	-6.81186e-11
		0.01428	-1.67166e-10	-9.05756e-11	-1.19504e-10																0.01428	-1.67166e-10	-1.4253e-10	-6.81328e-11
		0.0143	-1.67153e-10	-9.05822e-11	-1.19541e-10																0.0143	-1.67153e-10	-1.42583e-10	-6.8145e-11
		0.01432	-1.67137e-10	-9.05913e-11	-1.19579e-10																0.01432	-1.67137e-10	-1.42635e-10	-6.81555e-11
		0.01434	-1.6712e-10	-9.06032e-11	-1.19616e-10																0.01434	-1.6712e-10	-1.42687e-10	-6.81643e-11
		0.01436	-1.67101e-10	-9.06177e-11	-1.19654e-10																0.01436	-1.67101e-10	-1.42738e-10	-6.81716e-11
		0.01438	-1.67081e-10	-9.06351e-11	-1.19692e-10																0.01438	-1.67081e-10	-1.42787e-10	-6.81776e-11
		0.0144	-1.67059e-10	-9.06552e-11	-1.19731e-10																0.0144	-1.67059e-10	-1.42836e-10	-6.81826e-11
		0.01442	-1.67036e-10	-9.06782e-11	-1.19769e-10																0.01442	-1.67036e-10	-1.42882e-10	-6.81866e-11
		0.01444	-1.67011e-10	-9.07039e-11	-1.19809e-10																0.01444	-1.67011e-10	-1.42927e-10	-6.81899e-11
		0.01446	-1.66986e-10	-9.07324e-11	-1.19848e-10																0.01446	-1.66986e-10	-1.4297e-10	-6.81926e-11
		0.01448	-1.66959e-10	-9.07637e-11	-1.19887e-10																0.01448	-1.66959e-10	-1.43012e-10	-6.81947e-11
		0.0145	-1.66932e-10	-9.07979e-11	-1.19927e-10																0.0145	-1.66932e-10	-1.43051e-10	-6.81964e-11
		0.01452	-1.66905e-10	-9.08348e-11	-1.19966e-10																0.01452	-1.66905e-10	-1.43088e-10	-6.8198e-11
		0.01454	-1.66877e-10	-9.08747e-11	-1.20006e-10																0.01454	-1.66877e-10	-1.43122e-10	-6.81996e-11
		0.01456	-1.66849e-10	-9.09174e-11	-1.20045e-10																0.01456	-1.66849e-10	-1.43154e-10	-6.82014e-11
		0.01458	-1.6682e-10	-9.09631e-11	-1.20083e-10																0.01458	-1.6682e-10	-1.43183e-10	-6.82036e-11
		0.0146	-1.66792e-10	-9.10116e-11	-1.20122e-10																0.0146	-1.66792e-10	-1.43209e-10	-6.82063e-11
		0.01462	-1.66764e-10	-9.10629e-11	-1.2016e-10																0.01462	-1.66764e-10	-1.43232e-10	-6.82096e-11
		0.01464	-1.66737e-10	-9.11169e-11	-1.20198e-10																0.01464	-1.66737e-10	-1.43253e-10	-6.82137e-11
		0.01466	-1.66711e-10	-9.11733e-11	-1.20235e-10																0.01466	-1.66711e-10	-1.43271e-10	-6.82186e-11
		0.01468	-1.66686e-10	-9.12319e-11	-1.20271e-10																0.01468	-1.66686e-10	-1.43286e-10	-6.82243e-11
		0.0147	-1.66661e-10	-9.12925e-11	-1.20307e-10																0.0147	-1.66661e-10	-1.43299e-10	-6.82307e-11
		0.01472	-1.66638e-10	-9.1355e-11	-1.20343e-10																0.01472	-1.66638e-10	-1.43309e-10	-6.8238e-11
		0.01474	-1.66616e-10	-9.1419e-11	-1.20378e-10																0.01474	-1.66616e-10	-1.43317e-10	-6.8246e-11
		0.01476	-1.66594e-10	-9.14843e-11	-1.20413e-10																0.01476	-1.66594e-10	-1.43323e-10	-6.82547e-11
		0.01478	-1.66573e-10	-9.15507e-11	-1.20446e-10																0.01478	-1.66573e-10	-1.43326e-10	-6.82642e-11
		0.0148	-1.66552e-10	-9.16178e-11	-1.2048e-10																0.0148	-1.66552e-10	-1.43327e-10	-6.82744e-11
		0.01482	-1.66532e-10	-9.16855e-11	-1.20512e-10																0.01482	-1.66532e-10	-1.43326e-10	-6.82853e-11
		0.01484	-1.66511e-10	-9.17534e-11	-1.20544e-10																0.01484	-1.66511e-10	-1.43323e-10	-6.82968e-11
		0.01486	-1.66491e-10	-9.18215e-11	-1.20574e-10																0.01486	-1.66491e-10	-1.43318e-10	-6.83088e-11
		0.01488	-1.66471e-10	-9.18895e-11	-1.20604e-10																0.01488	-1.66471e-10	-1.43312e-10	-6.83213e-11
		0.0149	-1.6645e-10	-9.19571e-11	-1.20633e-10																0.0149	-1.6645e-10	-1.43304e-10	-6.83343e-11
		0.01492	-1.6643e-10	-9.20244e-11	-1.20661e-10																0.01492	-1.6643e-10	-1.43294e-10	-6.83477e-11
		0.01494	-1.66409e-10	-9.2091e-11	-1.20688e-10																0.01494	-1.66409e-10	-1.43284e-10	-6.83616e-11
		0.01496	-1.66388e-10	-9.2157e-11	-1.20713e-10																0.01496	-1.66388e-10	-1.43274e-10	-6.8376e-11
		0.01498	-1.66368e-10	-9.22222e-11	-1.20738e-10																0.01498	-1.66368e-10	-1.43262e-10	-6.83907e-11
		0.015	-1.66347e-10	-9.22864e-11	-1.20762e-10																0.015	-1.66347e-10	-1.43251e-10	-6.8406e-11
		0.01502	-1.66326e-10	-9.23497e-11	-1.20785e-10																0.01502	-1.66326e-10	-1.43239e-10	-6.84216e-11
		0.01504	-1.66306e-10	-9.24119e-11	-1.20806e-10																0.01504	-1.66306e-10	-1.43228e-10	-6.84378e-11
		0.01506	-1.66286e-10	-9.2473e-11	-1.20827e-10																0.01506	-1.66286e-10	-1.43217e-10	-6.84545e-11
		0.01508	-1.66266e-10	-9.25328e-11	-1.20846e-10																0.01508	-1.66266e-10	-1.43206e-10	-6.84718e-11
		0.0151	-1.66247e-10	-9.25915e-11	-1.20864e-10																0.0151	-1.66247e-10	-1.43197e-10	-6.84898e-11
		0.01512	-1.66229e-10	-9.26489e-11	-1.20881e-10																0.01512	-1.66229e-10	-1.43188e-10	-6.85086e-11
		0.01514	-1.66212e-10	-9.27051e-11	-1.20896e-10																0.01514	-1.66212e-10	-1.43181e-10	-6.85282e-11
		0.01516	-1.66195e-10	-9.276e-11	-1.2091e-10																0.01516	-1.66195e-10	-1.43175e-10	-6.85486e-11
		0.01518	-1.6618e-10	-9.28135e-11	-1.20923e-10																0.01518	-1.6618e-10	-1.4317e-10	-6.85699e-11
		0.0152	-1.66165e-10	-9.28655e-11	-1.20935e-10																0.0152	-1.66165e-10	-1.43167e-10	-6.85919e-11
		0.01522	-1.66152e-10	-9.2916e-11	-1.20945e-10																0.01522	-1.66152e-10	-1.43166e-10	-6.86146e-11
		0.01524	-1.6614e-10	-9.2965e-11	-1.20954e-10																0.01524	-1.6614e-10	-1.43166e-10	-6.86379e-11
		0.01526	-1.66129e-10	-9.30123e-11	-1.20962e-10																0.01526	-1.66129e-10	-1.43168e-10	-6.86615e-11
		0.01528	-1.6612e-10	-9.30579e-11	-1.20969e-10																0.01528	-1.6612e-10	-1.43172e-10	-6.86855e-11
		0.0153	-1.66112e-10	-9.31019e-11	-1.20975e-10																0.0153	-1.66112e-10	-1.43177e-10	-6.87097e-11
		0.01532	-1.66105e-10	-9.31443e-11	-1.2098e-10																0.01532	-1.66105e-10	-1.43185e-10	-6.87339e-11
		0.01534	-1.661e-10	-9.31854e-11	-1.20984e-10																0.01534	-1.661e-10	-1.43193e-10	-6.87582e-11
		0.01536	-1.66097e-10	-9.32252e-11	-1.20988e-10																0.01536	-1.66097e-10	-1.43204e-10	-6.87822e-11
		0.01538	-1.66095e-10	-9.32639e-11	-1.2099e-10																0.01538	-1.66095e-10	-1.43216e-10	-6.88059e-11
		0.0154	-1.66095e-10	-9.33017e-11	-1.20992e-10																0.0154	-1.66095e-10	-1.4323e-10	-6.8829e-11
		0.01542	-1.66097e-10	-9.33385e-11	-1.20994e-10																0.01542	-1.66097e-10	-1.43245e-10	-6.88514e-11
		0.01544	-1.66101e-10	-9.33745e-11	-1.20995e-10																0.01544	-1.66101e-10	-1.43262e-10	-6.8873e-11
		0.01546	-1.66107e-10	-9.34097e-11	-1.20995e-10																0.01546	-1.66107e-10	-1.43281e-10	-6.88938e-11
		0.01548	-1.66115e-10	-9.34441e-11	-1.20995e-10																0.01548	-1.66115e-10	-1.43301e-10	-6.89137e-11
		0.0155	-1.66124e-10	-9.34777e-11	-1.20995e-10																0.0155	-1.66124e-10	-1.43322e-10	-6.89328e-11
		0.01552	-1.66136e-10	-9.35107e-11	-1.20994e-10																0.01552	-1.66136e-10	-1.43345e-10	-6.89509e-11
		0.01554	-1.66149e-10	-9.3543e-11	-1.20994e-10																0.01554	-1.66149e-10	-1.43369e-10	-6.8968e-11
		0.01556	-1.66164e-10	-9.35746e-11	-1.20995e-10																0.01556	-1.66164e-10	-1.43394e-10	-6.8984e-11
		0.01558	-1.66181e-10	-9.36056e-11	-1.20995e-10																0.01558	-1.66181e-10	-1.4342e-10	-6.89987e-11
		0.0156	-1.662e-10	-9.3636e-11	-1.20996e-10																0.0156	-1.662e-10	-1.43446e-10	-6.90121e-11
		0.01562	-1.6622e-10	-9.36658e-11	-1.20998e-10																0.01562	-1.6622e-10	-1.43474e-10	-6.9024e-11
		0.01564	-1.66241e-10	-9.36951e-11	-1.21001e-10																0.01564	-1.66241e-10	-1.43502e-10	-6.90342e-11
		0.01566	-1.66264e-10	-9.37237e-11	-1.21005e-10																0.01566	-1.66264e-10	-1.43532e-10	-6.90429e-11
		0.01568	-1.66289e-10	-9.37519e-11	-1.21009e-10																0.01568	-1.66289e-10	-1.43562e-10	-6.905e-11
		0.0157	-1.66314e-10	-9.37797e-11	-1.21014e-10																0.0157	-1.66314e-10	-1.43594e-10	-6.90557e-11
		0.01572	-1.6634e-10	-9.38072e-11	-1.2102e-10																0.01572	-1.6634e-10	-1.43626e-10	-6.906e-11
		0.01574	-1.66367e-10	-9.38346e-11	-1.21026e-10																0.01574	-1.66367e-10	-1.43659e-10	-6.90631e-11
		0.01576	-1.66395e-10	-9.3862e-11	-1.21033e-10																0.01576	-1.66395e-10	-1.43693e-10	-6.9065e-11
		0.01578	-1.66424e-10	-9.38897e-11	-1.21041e-10																0.01578	-1.66424e-10	-1.43727e-10	-6.90657e-11
		0.0158	-1.66453e-10	-9.39178e-11	-1.21049e-10																0.0158	-1.66453e-10	-1.43762e-10	-6.90653e-11
		0.01582	-1.66482e-10	-9.39464e-11	-1.21057e-10																0.01582	-1.66482e-10	-1.43798e-10	-6.90639e-11
		0.01584	-1.66512e-10	-9.39757e-11	-1.21066e-10																0.01584	-1.66512e-10	-1.43833e-10	-6.90613e-11
		0.01586	-1.66542e-10	-9.40057e-11	-1.21076e-10																0.01586	-1.66542e-10	-1.4387e-10	-6.90577e-11
		0.01588	-1.66571e-10	-9.40364e-11	-1.21086e-10																0.01588	-1.66571e-10	-1.43907e-10	-6.9053e-11
		0.0159	-1.66601e-10	-9.40677e-11	-1.21096e-10																0.0159	-1.66601e-10	-1.43944e-10	-6.90472e-11
		0.01592	-1.66631e-10	-9.40997e-11	-1.21108e-10																0.01592	-1.66631e-10	-1.43982e-10	-6.90405e-11
		0.01594	-1.66661e-10	-9.41323e-11	-1.21119e-10																0.01594	-1.66661e-10	-1.4402e-10	-6.90328e-11
		0.01596	-1.66691e-10	-9.41653e-11	-1.21132e-10																0.01596	-1.66691e-10	-1.44059e-10	-6.90244e-11
		0.01598	-1.66722e-10	-9.41988e-11	-1.21145e-10																0.01598	-1.66722e-10	-1.44098e-10	-6.90155e-11
		0.016	-1.66753e-10	-9.42325e-11	-1.21159e-10																0.016	-1.66753e-10	-1.44137e-10	-6.90062e-11
		0.01602	-1.66784e-10	-9.42662e-11	-1.21173e-10																0.01602	-1.66784e-10	-1.44176e-10	-6.89966e-11
		0.01604	-1.66816e-10	-9.42995e-11	-1.21188e-10																0.01604	-1.66816e-10	-1.44215e-10	-6.89872e-11
		0.01606	-1.66848e-10	-9.43324e-11	-1.21203e-10																0.01606	-1.66848e-10	-1.44254e-10	-6.89778e-11
		0.01608	-1.6688e-10	-9.43642e-11	-1.21218e-10																0.01608	-1.6688e-10	-1.44292e-10	-6.89687e-11
		0.0161	-1.66912e-10	-9.4395e-11	-1.21234e-10																0.0161	-1.66912e-10	-1.44329e-10	-6.896e-11
		0.01612	-1.66943e-10	-9.44245e-11	-1.21249e-10																0.01612	-1.66943e-10	-1.44366e-10	-6.89518e-11
		0.01614	-1.66973e-10	-9.44525e-11	-1.21264e-10																0.01614	-1.66973e-10	-1.44403e-10	-6.89443e-11
		0.01616	-1.67001e-10	-9.44788e-11	-1.21279e-10																0.01616	-1.67001e-10	-1.44439e-10	-6.89378e-11
		0.01618	-1.67029e-10	-9.45034e-11	-1.21294e-10																0.01618	-1.67029e-10	-1.44475e-10	-6.89322e-11
		0.0162	-1.67055e-10	-9.45263e-11	-1.21309e-10																0.0162	-1.67055e-10	-1.4451e-10	-6.89279e-11
		0.01622	-1.6708e-10	-9.45476e-11	-1.21323e-10																0.01622	-1.6708e-10	-1.44545e-10	-6.89248e-11
		0.01624	-1.67104e-10	-9.45672e-11	-1.21338e-10																0.01624	-1.67104e-10	-1.44579e-10	-6.89231e-11
		0.01626	-1.67126e-10	-9.45853e-11	-1.21352e-10																0.01626	-1.67126e-10	-1.44612e-10	-6.89227e-11
		0.01628	-1.67147e-10	-9.46021e-11	-1.21366e-10																0.01628	-1.67147e-10	-1.44644e-10	-6.89238e-11
		0.0163	-1.67167e-10	-9.46176e-11	-1.21379e-10																0.0163	-1.67167e-10	-1.44676e-10	-6.89262e-11
		0.01632	-1.67185e-10	-9.46321e-11	-1.21393e-10																0.01632	-1.67185e-10	-1.44707e-10	-6.89301e-11
		0.01634	-1.67202e-10	-9.46454e-11	-1.21406e-10																0.01634	-1.67202e-10	-1.44737e-10	-6.89352e-11
		0.01636	-1.67217e-10	-9.46579e-11	-1.21418e-10																0.01636	-1.67217e-10	-1.44766e-10	-6.89417e-11
		0.01638	-1.67231e-10	-9.46696e-11	-1.2143e-10																0.01638	-1.67231e-10	-1.44793e-10	-6.89494e-11
		0.0164	-1.67244e-10	-9.46806e-11	-1.21441e-10																0.0164	-1.67244e-10	-1.4482e-10	-6.89582e-11
		0.01642	-1.67255e-10	-9.46909e-11	-1.21451e-10																0.01642	-1.67255e-10	-1.44846e-10	-6.89682e-11
		0.01644	-1.67265e-10	-9.47009e-11	-1.2146e-10																0.01644	-1.67265e-10	-1.4487e-10	-6.89791e-11
		0.01646	-1.67273e-10	-9.47104e-11	-1.21469e-10																0.01646	-1.67273e-10	-1.44893e-10	-6.89911e-11
		0.01648	-1.67279e-10	-9.47198e-11	-1.21476e-10																0.01648	-1.67279e-10	-1.44915e-10	-6.9004e-11
		0.0165	-1.67284e-10	-9.47292e-11	-1.21483e-10																0.0165	-1.67284e-10	-1.44934e-10	-6.90179e-11
		0.01652	-1.67286e-10	-9.47385e-11	-1.2149e-10																0.01652	-1.67286e-10	-1.44953e-10	-6.90327e-11
		0.01654	-1.67287e-10	-9.4748e-11	-1.21495e-10																0.01654	-1.67287e-10	-1.44969e-10	-6.90483e-11
		0.01656	-1.67286e-10	-9.47576e-11	-1.215e-10																0.01656	-1.67286e-10	-1.44984e-10	-6.90647e-11
		0.01658	-1.67282e-10	-9.47673e-11	-1.21505e-10																0.01658	-1.67282e-10	-1.44997e-10	-6.90819e-11
		0.0166	-1.67277e-10	-9.47772e-11	-1.21508e-10																0.0166	-1.67277e-10	-1.45009e-10	-6.90997e-11
		0.01662	-1.67269e-10	-9.47873e-11	-1.21511e-10																0.01662	-1.67269e-10	-1.4502e-10	-6.91183e-11
		0.01664	-1.67259e-10	-9.47976e-11	-1.21512e-10																0.01664	-1.67259e-10	-1.4503e-10	-6.91375e-11
		0.01666	-1.67246e-10	-9.48082e-11	-1.21513e-10																0.01666	-1.67246e-10	-1.45039e-10	-6.91573e-11
		0.01668	-1.67231e-10	-9.4819e-11	-1.21512e-10																0.01668	-1.67231e-10	-1.45047e-10	-6.91776e-11
		0.0167	-1.67213e-10	-9.48301e-11	-1.21511e-10																0.0167	-1.67213e-10	-1.45055e-10	-6.91984e-11
		0.01672	-1.67194e-10	-9.48414e-11	-1.21508e-10																0.01672	-1.67194e-10	-1.45061e-10	-6.92195e-11
		0.01674	-1.67172e-10	-9.4853e-11	-1.21504e-10																0.01674	-1.67172e-10	-1.45068e-10	-6.92407e-11
		0.01676	-1.67148e-10	-9.48647e-11	-1.21499e-10																0.01676	-1.67148e-10	-1.45073e-10	-6.92618e-11
		0.01678	-1.67123e-10	-9.48768e-11	-1.21493e-10																0.01678	-1.67123e-10	-1.45078e-10	-6.92826e-11
		0.0168	-1.67097e-10	-9.48891e-11	-1.21486e-10																0.0168	-1.67097e-10	-1.45083e-10	-6.9303e-11
		0.01682	-1.6707e-10	-9.49018e-11	-1.21479e-10																0.01682	-1.6707e-10	-1.45087e-10	-6.93226e-11
		0.01684	-1.67042e-10	-9.49147e-11	-1.2147e-10																0.01684	-1.67042e-10	-1.4509e-10	-6.93414e-11
		0.01686	-1.67014e-10	-9.49279e-11	-1.21461e-10																0.01686	-1.67014e-10	-1.45092e-10	-6.93591e-11
		0.01688	-1.66986e-10	-9.49412e-11	-1.21451e-10																0.01688	-1.66986e-10	-1.45094e-10	-6.93756e-11
		0.0169	-1.66957e-10	-9.49548e-11	-1.21441e-10																0.0169	-1.66957e-10	-1.45095e-10	-6.93908e-11
		0.01692	-1.6693e-10	-9.49685e-11	-1.2143e-10																0.01692	-1.6693e-10	-1.45094e-10	-6.94045e-11
		0.01694	-1.66902e-10	-9.49823e-11	-1.21418e-10																0.01694	-1.66902e-10	-1.45093e-10	-6.94167e-11
		0.01696	-1.66876e-10	-9.49962e-11	-1.21406e-10																0.01696	-1.66876e-10	-1.4509e-10	-6.94275e-11
		0.01698	-1.6685e-10	-9.50102e-11	-1.21393e-10																0.01698	-1.6685e-10	-1.45087e-10	-6.94367e-11
		0.017	-1.66826e-10	-9.50241e-11	-1.2138e-10																0.017	-1.66826e-10	-1.45083e-10	-6.94446e-11
		0.01702	-1.66802e-10	-9.50379e-11	-1.21366e-10																0.01702	-1.66802e-10	-1.45077e-10	-6.9451e-11
		0.01704	-1.66779e-10	-9.50514e-11	-1.21352e-10																0.01704	-1.66779e-10	-1.4507e-10	-6.9456e-11
		0.01706	-1.66757e-10	-9.50644e-11	-1.21337e-10																0.01706	-1.66757e-10	-1.45062e-10	-6.94595e-11
		0.01708	-1.66736e-10	-9.50769e-11	-1.21322e-10																0.01708	-1.66736e-10	-1.45053e-10	-6.94615e-11
		0.0171	-1.66716e-10	-9.50884e-11	-1.21307e-10																0.0171	-1.66716e-10	-1.45043e-10	-6.94619e-11
		0.01712	-1.66697e-10	-9.50988e-11	-1.21291e-10																0.01712	-1.66697e-10	-1.45033e-10	-6.94608e-11
		0.01714	-1.66679e-10	-9.5108e-11	-1.21275e-10																0.01714	-1.66679e-10	-1.45021e-10	-6.9458e-11
		0.01716	-1.66663e-10	-9.51157e-11	-1.2126e-10																0.01716	-1.66663e-10	-1.45009e-10	-6.94537e-11
		0.01718	-1.66648e-10	-9.51218e-11	-1.21244e-10																0.01718	-1.66648e-10	-1.44996e-10	-6.94479e-11
		0.0172	-1.66634e-10	-9.51262e-11	-1.21229e-10																0.0172	-1.66634e-10	-1.44982e-10	-6.94408e-11
		0.01722	-1.66623e-10	-9.5129e-11	-1.21214e-10																0.01722	-1.66623e-10	-1.44968e-10	-6.94323e-11
		0.01724	-1.66613e-10	-9.51301e-11	-1.21199e-10																0.01724	-1.66613e-10	-1.44954e-10	-6.94227e-11
		0.01726	-1.66605e-10	-9.51296e-11	-1.21185e-10																0.01726	-1.66605e-10	-1.44938e-10	-6.94118e-11
		0.01728	-1.66599e-10	-9.51276e-11	-1.21171e-10																0.01728	-1.66599e-10	-1.44922e-10	-6.93999e-11
		0.0173	-1.66595e-10	-9.51242e-11	-1.21157e-10																0.0173	-1.66595e-10	-1.44906e-10	-6.93868e-11
		0.01732	-1.66592e-10	-9.51194e-11	-1.21144e-10																0.01732	-1.66592e-10	-1.44889e-10	-6.93727e-11
		0.01734	-1.66592e-10	-9.51131e-11	-1.21131e-10																0.01734	-1.66592e-10	-1.44873e-10	-6.93576e-11
		0.01736	-1.66594e-10	-9.51055e-11	-1.21119e-10																0.01736	-1.66594e-10	-1.44855e-10	-6.93417e-11
		0.01738	-1.66599e-10	-9.50965e-11	-1.21107e-10																0.01738	-1.66599e-10	-1.44838e-10	-6.93251e-11
		0.0174	-1.66606e-10	-9.50861e-11	-1.21096e-10																0.0174	-1.66606e-10	-1.4482e-10	-6.93078e-11
		0.01742	-1.66615e-10	-9.50745e-11	-1.21085e-10																0.01742	-1.66615e-10	-1.44803e-10	-6.92899e-11
		0.01744	-1.66627e-10	-9.50616e-11	-1.21075e-10																0.01744	-1.66627e-10	-1.44786e-10	-6.92716e-11
		0.01746	-1.66641e-10	-9.50475e-11	-1.21066e-10																0.01746	-1.66641e-10	-1.4477e-10	-6.92529e-11
		0.01748	-1.66658e-10	-9.50325e-11	-1.21057e-10																0.01748	-1.66658e-10	-1.44754e-10	-6.92338e-11
		0.0175	-1.66677e-10	-9.50166e-11	-1.21049e-10																0.0175	-1.66677e-10	-1.44739e-10	-6.92145e-11
		0.01752	-1.66698e-10	-9.49999e-11	-1.21041e-10																0.01752	-1.66698e-10	-1.44725e-10	-6.9195e-11
		0.01754	-1.66722e-10	-9.49824e-11	-1.21035e-10																0.01754	-1.66722e-10	-1.44712e-10	-6.91753e-11
		0.01756	-1.66747e-10	-9.49644e-11	-1.21029e-10																0.01756	-1.66747e-10	-1.44701e-10	-6.91556e-11
		0.01758	-1.66774e-10	-9.4946e-11	-1.21023e-10																0.01758	-1.66774e-10	-1.44691e-10	-6.91357e-11
		0.0176	-1.66803e-10	-9.49274e-11	-1.21019e-10																0.0176	-1.66803e-10	-1.44683e-10	-6.91159e-11
		0.01762	-1.66833e-10	-9.49086e-11	-1.21015e-10																0.01762	-1.66833e-10	-1.44676e-10	-6.90961e-11
		0.01764	-1.66863e-10	-9.48899e-11	-1.21011e-10																0.01764	-1.66863e-10	-1.44671e-10	-6.90764e-11
		0.01766	-1.66895e-10	-9.48713e-11	-1.21008e-10																0.01766	-1.66895e-10	-1.44667e-10	-6.90571e-11
		0.01768	-1.66926e-10	-9.4853e-11	-1.21006e-10																0.01768	-1.66926e-10	-1.44666e-10	-6.90382e-11
		0.0177	-1.66958e-10	-9.4835e-11	-1.21005e-10																0.0177	-1.66958e-10	-1.44666e-10	-6.90198e-11
		0.01772	-1.6699e-10	-9.48173e-11	-1.21005e-10																0.01772	-1.6699e-10	-1.44668e-10	-6.90022e-11
		0.01774	-1.67022e-10	-9.48e-11	-1.21005e-10																0.01774	-1.67022e-10	-1.44672e-10	-6.89853e-11
		0.01776	-1.67054e-10	-9.47829e-11	-1.21006e-10																0.01776	-1.67054e-10	-1.44677e-10	-6.89695e-11
		0.01778	-1.67086e-10	-9.47661e-11	-1.21008e-10																0.01778	-1.67086e-10	-1.44685e-10	-6.89548e-11
		0.0178	-1.67118e-10	-9.47496e-11	-1.2101e-10																0.0178	-1.67118e-10	-1.44694e-10	-6.89412e-11
		0.01782	-1.67149e-10	-9.47335e-11	-1.21013e-10																0.01782	-1.67149e-10	-1.44706e-10	-6.8929e-11
		0.01784	-1.6718e-10	-9.4718e-11	-1.21017e-10																0.01784	-1.6718e-10	-1.4472e-10	-6.8918e-11
		0.01786	-1.6721e-10	-9.47032e-11	-1.21021e-10																0.01786	-1.6721e-10	-1.44735e-10	-6.89086e-11
		0.01788	-1.6724e-10	-9.4689e-11	-1.21025e-10																0.01788	-1.6724e-10	-1.44753e-10	-6.89006e-11
		0.0179	-1.67269e-10	-9.46756e-11	-1.21031e-10																0.0179	-1.67269e-10	-1.44773e-10	-6.88941e-11
		0.01792	-1.67297e-10	-9.4663e-11	-1.21036e-10																0.01792	-1.67297e-10	-1.44794e-10	-6.88894e-11
		0.01794	-1.67324e-10	-9.46514e-11	-1.21043e-10																0.01794	-1.67324e-10	-1.44817e-10	-6.88863e-11
		0.01796	-1.67351e-10	-9.46409e-11	-1.2105e-10																0.01796	-1.67351e-10	-1.44841e-10	-6.88848e-11
		0.01798	-1.67375e-10	-9.46315e-11	-1.21057e-10																0.01798	-1.67375e-10	-1.44867e-10	-6.88849e-11
		0.018	-1.67399e-10	-9.46234e-11	-1.21065e-10																0.018	-1.67399e-10	-1.44894e-10	-6.88865e-11
		0.01802	-1.67421e-10	-9.46167e-11	-1.21075e-10																0.01802	-1.67421e-10	-1.44922e-10	-6.88895e-11
		0.01804	-1.67443e-10	-9.46118e-11	-1.21084e-10																0.01804	-1.67443e-10	-1.44951e-10	-6.88937e-11
		0.01806	-1.67462e-10	-9.46086e-11	-1.21095e-10																0.01806	-1.67462e-10	-1.44981e-10	-6.8899e-11
		0.01808	-1.67481e-10	-9.46075e-11	-1.21106e-10																0.01808	-1.67481e-10	-1.45011e-10	-6.89053e-11
		0.0181	-1.67499e-10	-9.46084e-11	-1.21118e-10																0.0181	-1.67499e-10	-1.45043e-10	-6.89125e-11
		0.01812	-1.67516e-10	-9.46113e-11	-1.21131e-10																0.01812	-1.67516e-10	-1.45074e-10	-6.89207e-11
		0.01814	-1.67532e-10	-9.46163e-11	-1.21145e-10																0.01814	-1.67532e-10	-1.45107e-10	-6.89296e-11
		0.01816	-1.67547e-10	-9.46231e-11	-1.21159e-10																0.01816	-1.67547e-10	-1.45139e-10	-6.89392e-11
		0.01818	-1.67561e-10	-9.46319e-11	-1.21174e-10																0.01818	-1.67561e-10	-1.45172e-10	-6.89493e-11
		0.0182	-1.67573e-10	-9.46424e-11	-1.21189e-10																0.0182	-1.67573e-10	-1.45204e-10	-6.89597e-11
		0.01822	-1.67584e-10	-9.46545e-11	-1.21205e-10																0.01822	-1.67584e-10	-1.45237e-10	-6.89703e-11
		0.01824	-1.67595e-10	-9.46681e-11	-1.21221e-10																0.01824	-1.67595e-10	-1.45269e-10	-6.89809e-11
		0.01826	-1.67603e-10	-9.46831e-11	-1.21237e-10																0.01826	-1.67603e-10	-1.45302e-10	-6.89912e-11
		0.01828	-1.67611e-10	-9.46994e-11	-1.21253e-10																0.01828	-1.67611e-10	-1.45333e-10	-6.90012e-11
		0.0183	-1.67617e-10	-9.47167e-11	-1.21269e-10																0.0183	-1.67617e-10	-1.45365e-10	-6.90108e-11
		0.01832	-1.67622e-10	-9.4735e-11	-1.21285e-10																0.01832	-1.67622e-10	-1.45395e-10	-6.90198e-11
		0.01834	-1.67627e-10	-9.47542e-11	-1.213e-10																0.01834	-1.67627e-10	-1.45425e-10	-6.9028e-11
		0.01836	-1.6763e-10	-9.47742e-11	-1.21316e-10																0.01836	-1.6763e-10	-1.45454e-10	-6.90355e-11
		0.01838	-1.67633e-10	-9.47947e-11	-1.21331e-10																0.01838	-1.67633e-10	-1.45482e-10	-6.90419e-11
		0.0184	-1.67635e-10	-9.48157e-11	-1.21346e-10																0.0184	-1.67635e-10	-1.45509e-10	-6.90472e-11
		0.01842	-1.67636e-10	-9.48369e-11	-1.21361e-10																0.01842	-1.67636e-10	-1.45535e-10	-6.90513e-11
		0.01844	-1.67636e-10	-9.48582e-11	-1.21375e-10																0.01844	-1.67636e-10	-1.4556e-10	-6.90539e-11
		0.01846	-1.67637e-10	-9.48793e-11	-1.21389e-10																0.01846	-1.67637e-10	-1.45583e-10	-6.9055e-11
		0.01848	-1.67637e-10	-9.49001e-11	-1.21402e-10																0.01848	-1.67637e-10	-1.45606e-10	-6.90544e-11
		0.0185	-1.67636e-10	-9.49203e-11	-1.21415e-10																0.0185	-1.67636e-10	-1.45628e-10	-6.9052e-11
		0.01852	-1.67635e-10	-9.49399e-11	-1.21427e-10																0.01852	-1.67635e-10	-1.45649e-10	-6.90476e-11
		0.01854	-1.67635e-10	-9.49585e-11	-1.21439e-10																0.01854	-1.67635e-10	-1.45669e-10	-6.90414e-11
		0.01856	-1.67634e-10	-9.4976e-11	-1.21449e-10																0.01856	-1.67634e-10	-1.45688e-10	-6.90332e-11
		0.01858	-1.67633e-10	-9.49922e-11	-1.21459e-10																0.01858	-1.67633e-10	-1.45706e-10	-6.90232e-11
		0.0186	-1.67632e-10	-9.50071e-11	-1.21469e-10																0.0186	-1.67632e-10	-1.45724e-10	-6.90114e-11
		0.01862	-1.67631e-10	-9.50205e-11	-1.21477e-10																0.01862	-1.67631e-10	-1.4574e-10	-6.8998e-11
		0.01864	-1.67631e-10	-9.50326e-11	-1.21484e-10																0.01864	-1.67631e-10	-1.45755e-10	-6.89831e-11
		0.01866	-1.6763e-10	-9.50434e-11	-1.2149e-10																0.01866	-1.6763e-10	-1.45769e-10	-6.89666e-11
		0.01868	-1.6763e-10	-9.50528e-11	-1.21496e-10																0.01868	-1.6763e-10	-1.45781e-10	-6.89488e-11
		0.0187	-1.6763e-10	-9.50608e-11	-1.215e-10																0.0187	-1.6763e-10	-1.45792e-10	-6.89296e-11
		0.01872	-1.6763e-10	-9.50675e-11	-1.21504e-10																0.01872	-1.6763e-10	-1.45802e-10	-6.89091e-11
		0.01874	-1.6763e-10	-9.50728e-11	-1.21507e-10																0.01874	-1.6763e-10	-1.4581e-10	-6.88874e-11
		0.01876	-1.6763e-10	-9.50767e-11	-1.2151e-10																0.01876	-1.6763e-10	-1.45817e-10	-6.88646e-11
		0.01878	-1.67631e-10	-9.50793e-11	-1.21512e-10																0.01878	-1.67631e-10	-1.45823e-10	-6.88409e-11
		0.0188	-1.67632e-10	-9.50804e-11	-1.21513e-10																0.0188	-1.67632e-10	-1.45828e-10	-6.88163e-11
		0.01882	-1.67633e-10	-9.50802e-11	-1.21514e-10																0.01882	-1.67633e-10	-1.45832e-10	-6.87912e-11
		0.01884	-1.67635e-10	-9.50785e-11	-1.21515e-10																0.01884	-1.67635e-10	-1.45836e-10	-6.87655e-11
		0.01886	-1.67637e-10	-9.50755e-11	-1.21516e-10																0.01886	-1.67637e-10	-1.4584e-10	-6.87394e-11
		0.01888	-1.6764e-10	-9.50711e-11	-1.21516e-10																0.01888	-1.6764e-10	-1.45844e-10	-6.87132e-11
		0.0189	-1.67643e-10	-9.50654e-11	-1.21516e-10																0.0189	-1.67643e-10	-1.45847e-10	-6.86868e-11
		0.01892	-1.67647e-10	-9.50583e-11	-1.21517e-10																0.01892	-1.67647e-10	-1.4585e-10	-6.86603e-11
		0.01894	-1.67653e-10	-9.50499e-11	-1.21518e-10																0.01894	-1.67653e-10	-1.45853e-10	-6.86336e-11
		0.01896	-1.67659e-10	-9.50404e-11	-1.2152e-10																0.01896	-1.67659e-10	-1.45856e-10	-6.8607e-11
		0.01898	-1.67667e-10	-9.50297e-11	-1.21522e-10																0.01898	-1.67667e-10	-1.45859e-10	-6.85803e-11
		0.019	-1.67676e-10	-9.50178e-11	-1.21525e-10																0.019	-1.67676e-10	-1.45863e-10	-6.85537e-11
		0.01902	-1.67687e-10	-9.50049e-11	-1.21529e-10																0.01902	-1.67687e-10	-1.45866e-10	-6.85272e-11
		0.01904	-1.67699e-10	-9.4991e-11	-1.21534e-10																0.01904	-1.67699e-10	-1.4587e-10	-6.8501e-11
		0.01906	-1.67713e-10	-9.49761e-11	-1.2154e-10																0.01906	-1.67713e-10	-1.45874e-10	-6.84751e-11
		0.01908	-1.67728e-10	-9.49604e-11	-1.21548e-10																0.01908	-1.67728e-10	-1.45878e-10	-6.84496e-11
		0.0191	-1.67744e-10	-9.49439e-11	-1.21556e-10																0.0191	-1.67744e-10	-1.45883e-10	-6.84248e-11
		0.01912	-1.67762e-10	-9.49266e-11	-1.21565e-10																0.01912	-1.67762e-10	-1.45888e-10	-6.84006e-11
		0.01914	-1.67781e-10	-9.49087e-11	-1.21576e-10																0.01914	-1.67781e-10	-1.45893e-10	-6.83774e-11
		0.01916	-1.67801e-10	-9.48903e-11	-1.21587e-10																0.01916	-1.67801e-10	-1.45899e-10	-6.83552e-11
		0.01918	-1.67821e-10	-9.48713e-11	-1.216e-10																0.01918	-1.67821e-10	-1.45905e-10	-6.83343e-11
		0.0192	-1.67842e-10	-9.48517e-11	-1.21614e-10																0.0192	-1.67842e-10	-1.45911e-10	-6.83149e-11
		0.01922	-1.67864e-10	-9.48317e-11	-1.21629e-10																0.01922	-1.67864e-10	-1.45918e-10	-6.82972e-11
		0.01924	-1.67887e-10	-9.48113e-11	-1.21645e-10																0.01924	-1.67887e-10	-1.45926e-10	-6.82812e-11
		0.01926	-1.6791e-10	-9.47906e-11	-1.21662e-10																0.01926	-1.6791e-10	-1.45934e-10	-6.82669e-11
		0.01928	-1.67932e-10	-9.47698e-11	-1.2168e-10																0.01928	-1.67932e-10	-1.45942e-10	-6.82543e-11
		0.0193	-1.67955e-10	-9.47488e-11	-1.21699e-10																0.0193	-1.67955e-10	-1.45951e-10	-6.82433e-11
		0.01932	-1.67978e-10	-9.47279e-11	-1.2172e-10																0.01932	-1.67978e-10	-1.45961e-10	-6.82338e-11
		0.01934	-1.68e-10	-9.47072e-11	-1.21741e-10																0.01934	-1.68e-10	-1.45972e-10	-6.82257e-11
		0.01936	-1.68021e-10	-9.4687e-11	-1.21764e-10																0.01936	-1.68021e-10	-1.45983e-10	-6.82189e-11
		0.01938	-1.6804e-10	-9.46673e-11	-1.21787e-10																0.01938	-1.6804e-10	-1.45995e-10	-6.82133e-11
		0.0194	-1.68058e-10	-9.46484e-11	-1.21812e-10																0.0194	-1.68058e-10	-1.46006e-10	-6.82089e-11
		0.01942	-1.68074e-10	-9.46304e-11	-1.21837e-10																0.01942	-1.68074e-10	-1.46019e-10	-6.82057e-11
		0.01944	-1.68088e-10	-9.46135e-11	-1.21862e-10																0.01944	-1.68088e-10	-1.46031e-10	-6.82037e-11
		0.01946	-1.68099e-10	-9.45977e-11	-1.21889e-10																0.01946	-1.68099e-10	-1.46043e-10	-6.82028e-11
		0.01948	-1.68109e-10	-9.4583e-11	-1.21916e-10																0.01948	-1.68109e-10	-1.46055e-10	-6.82031e-11
		0.0195	-1.68116e-10	-9.45694e-11	-1.21943e-10																0.0195	-1.68116e-10	-1.46067e-10	-6.82045e-11
		0.01952	-1.68121e-10	-9.45568e-11	-1.2197e-10																0.01952	-1.68121e-10	-1.46079e-10	-6.8207e-11
		0.01954	-1.68123e-10	-9.45453e-11	-1.21998e-10																0.01954	-1.68123e-10	-1.46091e-10	-6.82107e-11
		0.01956	-1.68124e-10	-9.45347e-11	-1.22025e-10																0.01956	-1.68124e-10	-1.46102e-10	-6.82154e-11
		0.01958	-1.68122e-10	-9.45251e-11	-1.22053e-10																0.01958	-1.68122e-10	-1.46114e-10	-6.82212e-11
		0.0196	-1.68118e-10	-9.45164e-11	-1.22081e-10																0.0196	-1.68118e-10	-1.46125e-10	-6.82282e-11
		0.01962	-1.68113e-10	-9.45088e-11	-1.22109e-10																0.01962	-1.68113e-10	-1.46136e-10	-6.82362e-11
		0.01964	-1.68106e-10	-9.45022e-11	-1.22137e-10																0.01964	-1.68106e-10	-1.46147e-10	-6.82452e-11
		0.01966	-1.68097e-10	-9.44966e-11	-1.22165e-10																0.01966	-1.68097e-10	-1.46157e-10	-6.82552e-11
		0.01968	-1.68087e-10	-9.44922e-11	-1.22193e-10																0.01968	-1.68087e-10	-1.46166e-10	-6.82662e-11
		0.0197	-1.68076e-10	-9.4489e-11	-1.22221e-10																0.0197	-1.68076e-10	-1.46175e-10	-6.8278e-11
		0.01972	-1.68063e-10	-9.44867e-11	-1.22249e-10																0.01972	-1.68063e-10	-1.46183e-10	-6.82905e-11
		0.01974	-1.68049e-10	-9.44856e-11	-1.22277e-10																0.01974	-1.68049e-10	-1.4619e-10	-6.83037e-11
		0.01976	-1.68034e-10	-9.44855e-11	-1.22306e-10																0.01976	-1.68034e-10	-1.46196e-10	-6.83175e-11
		0.01978	-1.68018e-10	-9.44865e-11	-1.22335e-10																0.01978	-1.68018e-10	-1.46201e-10	-6.8332e-11
		0.0198	-1.68001e-10	-9.44883e-11	-1.22365e-10																0.0198	-1.68001e-10	-1.46206e-10	-6.83471e-11
		0.01982	-1.67983e-10	-9.4491e-11	-1.22395e-10																0.01982	-1.67983e-10	-1.46209e-10	-6.83629e-11
		0.01984	-1.67964e-10	-9.44945e-11	-1.22426e-10																0.01984	-1.67964e-10	-1.46212e-10	-6.83794e-11
		0.01986	-1.67945e-10	-9.44987e-11	-1.22458e-10																0.01986	-1.67945e-10	-1.46214e-10	-6.83966e-11
		0.01988	-1.67924e-10	-9.4504e-11	-1.2249e-10																0.01988	-1.67924e-10	-1.46215e-10	-6.84146e-11
		0.0199	-1.67903e-10	-9.45103e-11	-1.22523e-10																0.0199	-1.67903e-10	-1.46215e-10	-6.84331e-11
		0.01992	-1.67881e-10	-9.45177e-11	-1.22555e-10																0.01992	-1.67881e-10	-1.46214e-10	-6.84521e-11
		0.01994	-1.67859e-10	-9.45265e-11	-1.22588e-10																0.01994	-1.67859e-10	-1.46212e-10	-6.84715e-11
		0.01996	-1.67836e-10	-9.45364e-11	-1.2262e-10																0.01996	-1.67836e-10	-1.4621e-10	-6.84912e-11
		0.01998	-1.67813e-10	-9.45477e-11	-1.22652e-10																0.01998	-1.67813e-10	-1.46207e-10	-6.85109e-11
		0.02	-1.6779e-10	-9.45601e-11	-1.22683e-10																0.02	-1.6779e-10	-1.46204e-10	-6.85308e-11
		0.02002	-1.67766e-10	-9.45736e-11	-1.22713e-10																0.02002	-1.67766e-10	-1.462e-10	-6.85509e-11
		0.02004	-1.67743e-10	-9.45881e-11	-1.22743e-10																0.02004	-1.67743e-10	-1.46196e-10	-6.85711e-11
		0.02006	-1.6772e-10	-9.46036e-11	-1.22772e-10																0.02006	-1.6772e-10	-1.46192e-10	-6.85915e-11
		0.02008	-1.67697e-10	-9.462e-11	-1.22799e-10																0.02008	-1.67697e-10	-1.46187e-10	-6.86119e-11
		0.0201	-1.67675e-10	-9.46374e-11	-1.22827e-10																0.0201	-1.67675e-10	-1.46182e-10	-6.86324e-11
		0.02012	-1.67653e-10	-9.46558e-11	-1.22853e-10																0.02012	-1.67653e-10	-1.46177e-10	-6.86528e-11
		0.02014	-1.67633e-10	-9.46751e-11	-1.22879e-10																0.02014	-1.67633e-10	-1.46173e-10	-6.86729e-11
		0.02016	-1.67613e-10	-9.46954e-11	-1.22904e-10																0.02016	-1.67613e-10	-1.46168e-10	-6.86926e-11
		0.02018	-1.67595e-10	-9.47166e-11	-1.22929e-10																0.02018	-1.67595e-10	-1.46164e-10	-6.87119e-11
		0.0202	-1.67579e-10	-9.47384e-11	-1.22953e-10																0.0202	-1.67579e-10	-1.4616e-10	-6.87306e-11
		0.02022	-1.67564e-10	-9.47607e-11	-1.22976e-10																0.02022	-1.67564e-10	-1.46156e-10	-6.87487e-11
		0.02024	-1.67551e-10	-9.47832e-11	-1.22998e-10																0.02024	-1.67551e-10	-1.46153e-10	-6.87663e-11
		0.02026	-1.6754e-10	-9.48058e-11	-1.23019e-10																0.02026	-1.6754e-10	-1.4615e-10	-6.87833e-11
		0.02028	-1.67531e-10	-9.48282e-11	-1.2304e-10																0.02028	-1.67531e-10	-1.46148e-10	-6.87996e-11
		0.0203	-1.67524e-10	-9.48503e-11	-1.2306e-10																0.0203	-1.67524e-10	-1.46146e-10	-6.88155e-11
		0.02032	-1.67519e-10	-9.4872e-11	-1.23079e-10																0.02032	-1.67519e-10	-1.46145e-10	-6.88309e-11
		0.02034	-1.67516e-10	-9.48932e-11	-1.23097e-10																0.02034	-1.67516e-10	-1.46145e-10	-6.88459e-11
		0.02036	-1.67515e-10	-9.49137e-11	-1.23114e-10																0.02036	-1.67515e-10	-1.46146e-10	-6.88607e-11
		0.02038	-1.67515e-10	-9.49336e-11	-1.23131e-10																0.02038	-1.67515e-10	-1.46149e-10	-6.88754e-11
		0.0204	-1.67518e-10	-9.49529e-11	-1.23147e-10																0.0204	-1.67518e-10	-1.46152e-10	-6.88902e-11
		0.02042	-1.67522e-10	-9.49713e-11	-1.23162e-10																0.02042	-1.67522e-10	-1.46157e-10	-6.89051e-11
		0.02044	-1.67529e-10	-9.4989e-11	-1.23176e-10																0.02044	-1.67529e-10	-1.46163e-10	-6.89203e-11
		0.02046	-1.67537e-10	-9.50059e-11	-1.23189e-10																0.02046	-1.67537e-10	-1.4617e-10	-6.89359e-11
		0.02048	-1.67547e-10	-9.5022e-11	-1.232e-10																0.02048	-1.67547e-10	-1.4618e-10	-6.89519e-11
		0.0205	-1.6756e-10	-9.50372e-11	-1.2321e-10																0.0205	-1.6756e-10	-1.46191e-10	-6.89685e-11
		0.02052	-1.67574e-10	-9.50514e-11	-1.23219e-10																0.02052	-1.67574e-10	-1.46204e-10	-6.89857e-11
		0.02054	-1.6759e-10	-9.5065e-11	-1.23226e-10																0.02054	-1.6759e-10	-1.46218e-10	-6.90034e-11
		0.02056	-1.67608e-10	-9.50778e-11	-1.23233e-10																0.02056	-1.67608e-10	-1.46235e-10	-6.90215e-11
		0.02058	-1.67628e-10	-9.50902e-11	-1.23237e-10																0.02058	-1.67628e-10	-1.46253e-10	-6.904e-11
		0.0206	-1.6765e-10	-9.51022e-11	-1.23241e-10																0.0206	-1.6765e-10	-1.46272e-10	-6.90586e-11
		0.02062	-1.67674e-10	-9.5114e-11	-1.23243e-10																0.02062	-1.67674e-10	-1.46293e-10	-6.90771e-11
		0.02064	-1.677e-10	-9.51256e-11	-1.23245e-10																0.02064	-1.677e-10	-1.46315e-10	-6.90956e-11
		0.02066	-1.67728e-10	-9.5137e-11	-1.23246e-10																0.02066	-1.67728e-10	-1.46339e-10	-6.91139e-11
		0.02068	-1.67757e-10	-9.51483e-11	-1.23246e-10																0.02068	-1.67757e-10	-1.46363e-10	-6.91319e-11
		0.0207	-1.67789e-10	-9.51596e-11	-1.23246e-10																0.0207	-1.67789e-10	-1.46389e-10	-6.91496e-11
		0.02072	-1.67822e-10	-9.51709e-11	-1.23245e-10																0.02072	-1.67822e-10	-1.46416e-10	-6.91672e-11
		0.02074	-1.67857e-10	-9.51824e-11	-1.23244e-10																0.02074	-1.67857e-10	-1.46443e-10	-6.91846e-11
		0.02076	-1.67894e-10	-9.51941e-11	-1.23243e-10																0.02076	-1.67894e-10	-1.46471e-10	-6.92019e-11
		0.02078	-1.67932e-10	-9.52062e-11	-1.23241e-10																0.02078	-1.67932e-10	-1.46499e-10	-6.92192e-11
		0.0208	-1.67972e-10	-9.52187e-11	-1.23239e-10																0.0208	-1.67972e-10	-1.46527e-10	-6.92367e-11
		0.02082	-1.68012e-10	-9.52319e-11	-1.23237e-10																0.02082	-1.68012e-10	-1.46555e-10	-6.92544e-11
		0.02084	-1.68054e-10	-9.52456e-11	-1.23234e-10																0.02084	-1.68054e-10	-1.46582e-10	-6.92725e-11
		0.02086	-1.68095e-10	-9.52602e-11	-1.2323e-10																0.02086	-1.68095e-10	-1.46609e-10	-6.9291e-11
		0.02088	-1.68137e-10	-9.52756e-11	-1.23226e-10																0.02088	-1.68137e-10	-1.46635e-10	-6.93103e-11
		0.0209	-1.68179e-10	-9.5292e-11	-1.23221e-10																0.0209	-1.68179e-10	-1.4666e-10	-6.93303e-11
		0.02092	-1.6822e-10	-9.53094e-11	-1.23215e-10																0.02092	-1.6822e-10	-1.46685e-10	-6.93512e-11
		0.02094	-1.68261e-10	-9.53279e-11	-1.23208e-10																0.02094	-1.68261e-10	-1.46709e-10	-6.9373e-11
		0.02096	-1.683e-10	-9.53476e-11	-1.23201e-10																0.02096	-1.683e-10	-1.46732e-10	-6.93956e-11
		0.02098	-1.68338e-10	-9.53683e-11	-1.23193e-10																0.02098	-1.68338e-10	-1.46754e-10	-6.94189e-11
		0.021	-1.68375e-10	-9.539e-11	-1.23185e-10																0.021	-1.68375e-10	-1.46775e-10	-6.94428e-11
		0.02102	-1.6841e-10	-9.54126e-11	-1.23177e-10																0.02102	-1.6841e-10	-1.46794e-10	-6.94671e-11
		0.02104	-1.68443e-10	-9.54362e-11	-1.23168e-10																0.02104	-1.68443e-10	-1.46812e-10	-6.94916e-11
		0.02106	-1.68474e-10	-9.54608e-11	-1.23158e-10																0.02106	-1.68474e-10	-1.46829e-10	-6.95163e-11
		0.02108	-1.68502e-10	-9.54862e-11	-1.23149e-10																0.02108	-1.68502e-10	-1.46843e-10	-6.95409e-11
		0.0211	-1.68528e-10	-9.55127e-11	-1.2314e-10																0.0211	-1.68528e-10	-1.46856e-10	-6.95655e-11
		0.02112	-1.68552e-10	-9.55403e-11	-1.2313e-10																0.02112	-1.68552e-10	-1.46867e-10	-6.95898e-11
		0.02114	-1.68573e-10	-9.5569e-11	-1.23121e-10																0.02114	-1.68573e-10	-1.46877e-10	-6.96137e-11
		0.02116	-1.68591e-10	-9.55987e-11	-1.23111e-10																0.02116	-1.68591e-10	-1.46885e-10	-6.96371e-11
		0.02118	-1.68606e-10	-9.56293e-11	-1.23101e-10																0.02118	-1.68606e-10	-1.46893e-10	-6.96597e-11
		0.0212	-1.68618e-10	-9.56609e-11	-1.23092e-10																0.0212	-1.68618e-10	-1.46899e-10	-6.96815e-11
		0.02122	-1.68627e-10	-9.56932e-11	-1.23082e-10																0.02122	-1.68627e-10	-1.46903e-10	-6.97024e-11
		0.02124	-1.68632e-10	-9.57263e-11	-1.23072e-10																0.02124	-1.68632e-10	-1.46907e-10	-6.97224e-11
		0.02126	-1.68635e-10	-9.57598e-11	-1.23062e-10																0.02126	-1.68635e-10	-1.4691e-10	-6.97415e-11
		0.02128	-1.68635e-10	-9.57936e-11	-1.23052e-10																0.02128	-1.68635e-10	-1.46911e-10	-6.97596e-11
		0.0213	-1.68631e-10	-9.58276e-11	-1.23043e-10																0.0213	-1.68631e-10	-1.46912e-10	-6.9777e-11
		0.02132	-1.68625e-10	-9.58616e-11	-1.23033e-10																0.02132	-1.68625e-10	-1.46911e-10	-6.97935e-11
		0.02134	-1.68615e-10	-9.58953e-11	-1.23025e-10																0.02134	-1.68615e-10	-1.4691e-10	-6.98094e-11
		0.02136	-1.68602e-10	-9.59287e-11	-1.23017e-10																0.02136	-1.68602e-10	-1.46908e-10	-6.98245e-11
		0.02138	-1.68587e-10	-9.59615e-11	-1.23009e-10																0.02138	-1.68587e-10	-1.46905e-10	-6.98389e-11
		0.0214	-1.68568e-10	-9.59937e-11	-1.23003e-10																0.0214	-1.68568e-10	-1.46902e-10	-6.98526e-11
		0.02142	-1.68548e-10	-9.60252e-11	-1.22997e-10																0.02142	-1.68548e-10	-1.46899e-10	-6.98655e-11
		0.02144	-1.68525e-10	-9.60558e-11	-1.22992e-10																0.02144	-1.68525e-10	-1.46895e-10	-6.98774e-11
		0.02146	-1.68501e-10	-9.60853e-11	-1.22988e-10																0.02146	-1.68501e-10	-1.46891e-10	-6.98883e-11
		0.02148	-1.68475e-10	-9.61138e-11	-1.22986e-10																0.02148	-1.68475e-10	-1.46887e-10	-6.98982e-11
		0.0215	-1.68447e-10	-9.61412e-11	-1.22984e-10																0.0215	-1.68447e-10	-1.46883e-10	-6.99071e-11
		0.02152	-1.68418e-10	-9.61676e-11	-1.22983e-10																0.02152	-1.68418e-10	-1.46879e-10	-6.99149e-11
		0.02154	-1.68388e-10	-9.6193e-11	-1.22983e-10																0.02154	-1.68388e-10	-1.46874e-10	-6.99218e-11
		0.02156	-1.68358e-10	-9.62177e-11	-1.22984e-10																0.02156	-1.68358e-10	-1.4687e-10	-6.99279e-11
		0.02158	-1.68326e-10	-9.62415e-11	-1.22985e-10																0.02158	-1.68326e-10	-1.46865e-10	-6.99333e-11
		0.0216	-1.68294e-10	-9.62646e-11	-1.22988e-10																0.0216	-1.68294e-10	-1.4686e-10	-6.99382e-11
		0.02162	-1.68261e-10	-9.62871e-11	-1.22991e-10																0.02162	-1.68261e-10	-1.46855e-10	-6.99427e-11
		0.02164	-1.68228e-10	-9.6309e-11	-1.22995e-10																0.02164	-1.68228e-10	-1.46851e-10	-6.9947e-11
		0.02166	-1.68194e-10	-9.63303e-11	-1.22999e-10																0.02166	-1.68194e-10	-1.46847e-10	-6.99512e-11
		0.02168	-1.6816e-10	-9.63512e-11	-1.23004e-10																0.02168	-1.6816e-10	-1.46843e-10	-6.99553e-11
		0.0217	-1.68125e-10	-9.63717e-11	-1.23009e-10																0.0217	-1.68125e-10	-1.4684e-10	-6.99594e-11
		0.02172	-1.6809e-10	-9.63918e-11	-1.23015e-10																0.02172	-1.6809e-10	-1.46838e-10	-6.99635e-11
		0.02174	-1.68056e-10	-9.64118e-11	-1.23021e-10																0.02174	-1.68056e-10	-1.46836e-10	-6.99674e-11
		0.02176	-1.68021e-10	-9.64317e-11	-1.23027e-10																0.02176	-1.68021e-10	-1.46835e-10	-6.99711e-11
		0.02178	-1.67988e-10	-9.64518e-11	-1.23033e-10																0.02178	-1.67988e-10	-1.46835e-10	-6.99743e-11
		0.0218	-1.67955e-10	-9.64721e-11	-1.23039e-10																0.0218	-1.67955e-10	-1.46835e-10	-6.99769e-11
		0.02182	-1.67923e-10	-9.64926e-11	-1.23044e-10																0.02182	-1.67923e-10	-1.46836e-10	-6.99789e-11
		0.02184	-1.67893e-10	-9.65135e-11	-1.23049e-10																0.02184	-1.67893e-10	-1.46837e-10	-6.99802e-11
		0.02186	-1.67863e-10	-9.65347e-11	-1.23053e-10																0.02186	-1.67863e-10	-1.46839e-10	-6.99806e-11
		0.02188	-1.67835e-10	-9.65562e-11	-1.23055e-10																0.02188	-1.67835e-10	-1.46842e-10	-6.99801e-11
		0.0219	-1.67809e-10	-9.65779e-11	-1.23057e-10																0.0219	-1.67809e-10	-1.46845e-10	-6.99786e-11
		0.02192	-1.67784e-10	-9.65998e-11	-1.23059e-10																0.02192	-1.67784e-10	-1.46849e-10	-6.99762e-11
		0.02194	-1.67761e-10	-9.66218e-11	-1.23059e-10																0.02194	-1.67761e-10	-1.46853e-10	-6.99728e-11
		0.02196	-1.67739e-10	-9.66439e-11	-1.23058e-10																0.02196	-1.67739e-10	-1.46858e-10	-6.99684e-11
		0.02198	-1.6772e-10	-9.66664e-11	-1.23057e-10																0.02198	-1.6772e-10	-1.46864e-10	-6.99631e-11
		0.022	-1.67702e-10	-9.66893e-11	-1.23054e-10																0.022	-1.67702e-10	-1.4687e-10	-6.99569e-11
		0.02202	-1.67685e-10	-9.67126e-11	-1.23051e-10																0.02202	-1.67685e-10	-1.46877e-10	-6.99499e-11
		0.02204	-1.6767e-10	-9.67365e-11	-1.23047e-10																0.02204	-1.6767e-10	-1.46885e-10	-6.99421e-11
		0.02206	-1.67657e-10	-9.67608e-11	-1.23042e-10																0.02206	-1.67657e-10	-1.46893e-10	-6.99335e-11
		0.02208	-1.67645e-10	-9.67858e-11	-1.23036e-10																0.02208	-1.67645e-10	-1.46902e-10	-6.9924e-11
		0.0221	-1.67635e-10	-9.68111e-11	-1.23029e-10																0.0221	-1.67635e-10	-1.46912e-10	-6.99138e-11
		0.02212	-1.67626e-10	-9.68369e-11	-1.2302e-10																0.02212	-1.67626e-10	-1.46923e-10	-6.99028e-11
		0.02214	-1.67618e-10	-9.6863e-11	-1.23009e-10																0.02214	-1.67618e-10	-1.46934e-10	-6.98912e-11
		0.02216	-1.67612e-10	-9.68895e-11	-1.22998e-10																0.02216	-1.67612e-10	-1.46945e-10	-6.98791e-11
		0.02218	-1.67607e-10	-9.69164e-11	-1.22984e-10																0.02218	-1.67607e-10	-1.46957e-10	-6.98667e-11
		0.0222	-1.67603e-10	-9.69436e-11	-1.22969e-10																0.0222	-1.67603e-10	-1.4697e-10	-6.98542e-11
		0.02222	-1.67601e-10	-9.69713e-11	-1.22953e-10																0.02222	-1.67601e-10	-1.46983e-10	-6.98417e-11
		0.02224	-1.67601e-10	-9.69994e-11	-1.22934e-10																0.02224	-1.67601e-10	-1.46996e-10	-6.98294e-11
		0.02226	-1.67603e-10	-9.7028e-11	-1.22915e-10																0.02226	-1.67603e-10	-1.4701e-10	-6.98174e-11
		0.02228	-1.67606e-10	-9.70569e-11	-1.22893e-10																0.02228	-1.67606e-10	-1.47023e-10	-6.98058e-11
		0.0223	-1.67611e-10	-9.70863e-11	-1.22871e-10																0.0223	-1.67611e-10	-1.47037e-10	-6.97948e-11
		0.02232	-1.67619e-10	-9.7116e-11	-1.22847e-10																0.02232	-1.67619e-10	-1.47051e-10	-6.97843e-11
		0.02234	-1.67629e-10	-9.7146e-11	-1.22822e-10																0.02234	-1.67629e-10	-1.47065e-10	-6.97745e-11
		0.02236	-1.6764e-10	-9.71761e-11	-1.22797e-10																0.02236	-1.6764e-10	-1.47079e-10	-6.97652e-11
		0.02238	-1.67654e-10	-9.72062e-11	-1.2277e-10																0.02238	-1.67654e-10	-1.47092e-10	-6.97565e-11
		0.0224	-1.6767e-10	-9.72363e-11	-1.22743e-10																0.0224	-1.6767e-10	-1.47105e-10	-6.97483e-11
		0.02242	-1.67687e-10	-9.72665e-11	-1.22716e-10																0.02242	-1.67687e-10	-1.47118e-10	-6.97407e-11
		0.02244	-1.67705e-10	-9.72965e-11	-1.22689e-10																0.02244	-1.67705e-10	-1.4713e-10	-6.97338e-11
		0.02246	-1.67724e-10	-9.73266e-11	-1.22662e-10																0.02246	-1.67724e-10	-1.47142e-10	-6.97276e-11
		0.02248	-1.67745e-10	-9.73566e-11	-1.22636e-10																0.02248	-1.67745e-10	-1.47153e-10	-6.97222e-11
		0.0225	-1.67766e-10	-9.73867e-11	-1.2261e-10																0.0225	-1.67766e-10	-1.47163e-10	-6.97178e-11
		0.02252	-1.67787e-10	-9.74167e-11	-1.22586e-10																0.02252	-1.67787e-10	-1.47172e-10	-6.97144e-11
		0.02254	-1.6781e-10	-9.74465e-11	-1.22563e-10																0.02254	-1.6781e-10	-1.4718e-10	-6.97123e-11
		0.02256	-1.67832e-10	-9.7476e-11	-1.22541e-10																0.02256	-1.67832e-10	-1.47187e-10	-6.97117e-11
		0.02258	-1.67855e-10	-9.75051e-11	-1.2252e-10																0.02258	-1.67855e-10	-1.47193e-10	-6.97125e-11
		0.0226	-1.67878e-10	-9.75336e-11	-1.22502e-10																0.0226	-1.67878e-10	-1.47198e-10	-6.9715e-11
		0.02262	-1.67901e-10	-9.75613e-11	-1.22485e-10																0.02262	-1.67901e-10	-1.47202e-10	-6.97191e-11
		0.02264	-1.67924e-10	-9.7588e-11	-1.22469e-10																0.02264	-1.67924e-10	-1.47204e-10	-6.97251e-11
		0.02266	-1.67946e-10	-9.76138e-11	-1.22455e-10																0.02266	-1.67946e-10	-1.47206e-10	-6.97328e-11
		0.02268	-1.67968e-10	-9.76386e-11	-1.22443e-10																0.02268	-1.67968e-10	-1.47207e-10	-6.97423e-11
		0.0227	-1.67988e-10	-9.76622e-11	-1.22433e-10																0.0227	-1.67988e-10	-1.47206e-10	-6.97535e-11
		0.02272	-1.68008e-10	-9.76847e-11	-1.22424e-10																0.02272	-1.68008e-10	-1.47205e-10	-6.97664e-11
		0.02274	-1.68027e-10	-9.77059e-11	-1.22418e-10																0.02274	-1.68027e-10	-1.47204e-10	-6.97807e-11
		0.02276	-1.68044e-10	-9.77255e-11	-1.22413e-10																0.02276	-1.68044e-10	-1.47202e-10	-6.97964e-11
		0.02278	-1.68059e-10	-9.77436e-11	-1.22411e-10																0.02278	-1.68059e-10	-1.472e-10	-6.98134e-11
		0.0228	-1.68073e-10	-9.77598e-11	-1.2241e-10																0.0228	-1.68073e-10	-1.47197e-10	-6.98313e-11
		0.02282	-1.68085e-10	-9.77741e-11	-1.22411e-10																0.02282	-1.68085e-10	-1.47195e-10	-6.98501e-11
		0.02284	-1.68095e-10	-9.77862e-11	-1.22415e-10																0.02284	-1.68095e-10	-1.47193e-10	-6.98695e-11
		0.02286	-1.68103e-10	-9.77962e-11	-1.2242e-10																0.02286	-1.68103e-10	-1.47191e-10	-6.98894e-11
		0.02288	-1.6811e-10	-9.78039e-11	-1.22427e-10																0.02288	-1.6811e-10	-1.47189e-10	-6.99096e-11
		0.0229	-1.68115e-10	-9.78095e-11	-1.22436e-10																0.0229	-1.68115e-10	-1.47186e-10	-6.99299e-11
		0.02292	-1.68119e-10	-9.78129e-11	-1.22446e-10																0.02292	-1.68119e-10	-1.47184e-10	-6.99505e-11
		0.02294	-1.68121e-10	-9.78142e-11	-1.22459e-10																0.02294	-1.68121e-10	-1.47182e-10	-6.99712e-11
		0.02296	-1.68122e-10	-9.78135e-11	-1.22473e-10																0.02296	-1.68122e-10	-1.4718e-10	-6.9992e-11
		0.02298	-1.68123e-10	-9.7811e-11	-1.22488e-10																0.02298	-1.68123e-10	-1.47178e-10	-7.00131e-11
		0.023	-1.68122e-10	-9.78068e-11	-1.22504e-10																0.023	-1.68122e-10	-1.47176e-10	-7.00344e-11
		0.02302	-1.6812e-10	-9.78013e-11	-1.22522e-10																0.02302	-1.6812e-10	-1.47175e-10	-7.00559e-11
		0.02304	-1.68118e-10	-9.77946e-11	-1.2254e-10																0.02304	-1.68118e-10	-1.47174e-10	-7.00777e-11
		0.02306	-1.68115e-10	-9.7787e-11	-1.2256e-10																0.02306	-1.68115e-10	-1.47175e-10	-7.00998e-11
		0.02308	-1.68111e-10	-9.77786e-11	-1.2258e-10																0.02308	-1.68111e-10	-1.47176e-10	-7.0122e-11
		0.0231	-1.68107e-10	-9.77696e-11	-1.226e-10																0.0231	-1.68107e-10	-1.47179e-10	-7.01444e-11
		0.02312	-1.68102e-10	-9.77603e-11	-1.22621e-10																0.02312	-1.68102e-10	-1.47183e-10	-7.01669e-11
		0.02314	-1.68097e-10	-9.77507e-11	-1.22643e-10																0.02314	-1.68097e-10	-1.47189e-10	-7.01896e-11
		0.02316	-1.68091e-10	-9.77411e-11	-1.22665e-10																0.02316	-1.68091e-10	-1.47195e-10	-7.02124e-11
		0.02318	-1.68086e-10	-9.77316e-11	-1.22687e-10																0.02318	-1.68086e-10	-1.47203e-10	-7.02352e-11
		0.0232	-1.68081e-10	-9.77225e-11	-1.2271e-10																0.0232	-1.68081e-10	-1.47213e-10	-7.02582e-11
		0.02322	-1.68076e-10	-9.77139e-11	-1.22733e-10																0.02322	-1.68076e-10	-1.47223e-10	-7.02811e-11
		0.02324	-1.6807e-10	-9.77058e-11	-1.22756e-10																0.02324	-1.6807e-10	-1.47234e-10	-7.03039e-11
		0.02326	-1.68066e-10	-9.76986e-11	-1.22779e-10																0.02326	-1.68066e-10	-1.47247e-10	-7.03265e-11
		0.02328	-1.68061e-10	-9.76921e-11	-1.22803e-10																0.02328	-1.68061e-10	-1.47261e-10	-7.03489e-11
		0.0233	-1.68057e-10	-9.76866e-11	-1.22825e-10																0.0233	-1.68057e-10	-1.47276e-10	-7.0371e-11
		0.02332	-1.68053e-10	-9.76821e-11	-1.22848e-10																0.02332	-1.68053e-10	-1.47292e-10	-7.03927e-11
		0.02334	-1.68049e-10	-9.76786e-11	-1.22869e-10																0.02334	-1.68049e-10	-1.47308e-10	-7.04138e-11
		0.02336	-1.68046e-10	-9.76761e-11	-1.22889e-10																0.02336	-1.68046e-10	-1.47326e-10	-7.04343e-11
		0.02338	-1.68044e-10	-9.76748e-11	-1.22908e-10																0.02338	-1.68044e-10	-1.47345e-10	-7.04542e-11
		0.0234	-1.68042e-10	-9.76743e-11	-1.22926e-10																0.0234	-1.68042e-10	-1.47365e-10	-7.04733e-11
		0.02342	-1.6804e-10	-9.76749e-11	-1.22942e-10																0.02342	-1.6804e-10	-1.47385e-10	-7.04916e-11
		0.02344	-1.68039e-10	-9.76766e-11	-1.22957e-10																0.02344	-1.68039e-10	-1.47406e-10	-7.05091e-11
		0.02346	-1.68038e-10	-9.76792e-11	-1.22969e-10																0.02346	-1.68038e-10	-1.47428e-10	-7.05258e-11
		0.02348	-1.68038e-10	-9.76829e-11	-1.2298e-10																0.02348	-1.68038e-10	-1.4745e-10	-7.05416e-11
		0.0235	-1.68038e-10	-9.76875e-11	-1.22988e-10																0.0235	-1.68038e-10	-1.47473e-10	-7.05564e-11
		0.02352	-1.68038e-10	-9.76929e-11	-1.22995e-10																0.02352	-1.68038e-10	-1.47497e-10	-7.05703e-11
		0.02354	-1.68038e-10	-9.76993e-11	-1.23e-10																0.02354	-1.68038e-10	-1.4752e-10	-7.05831e-11
		0.02356	-1.68039e-10	-9.77062e-11	-1.23002e-10																0.02356	-1.68039e-10	-1.47545e-10	-7.05948e-11
		0.02358	-1.68039e-10	-9.77138e-11	-1.23003e-10																0.02358	-1.68039e-10	-1.47569e-10	-7.06052e-11
		0.0236	-1.6804e-10	-9.77219e-11	-1.23001e-10																0.0236	-1.6804e-10	-1.47594e-10	-7.06142e-11
		0.02362	-1.68041e-10	-9.77303e-11	-1.22998e-10																0.02362	-1.68041e-10	-1.47618e-10	-7.06217e-11
		0.02364	-1.68043e-10	-9.77391e-11	-1.22993e-10																0.02364	-1.68043e-10	-1.47643e-10	-7.06275e-11
		0.02366	-1.68044e-10	-9.7748e-11	-1.22987e-10																0.02366	-1.68044e-10	-1.47667e-10	-7.06316e-11
		0.02368	-1.68047e-10	-9.77572e-11	-1.2298e-10																0.02368	-1.68047e-10	-1.47691e-10	-7.06338e-11
		0.0237	-1.68049e-10	-9.77666e-11	-1.22971e-10																0.0237	-1.68049e-10	-1.47714e-10	-7.06341e-11
		0.02372	-1.68053e-10	-9.77761e-11	-1.22963e-10																0.02372	-1.68053e-10	-1.47737e-10	-7.06325e-11
		0.02374	-1.68057e-10	-9.77859e-11	-1.22953e-10																0.02374	-1.68057e-10	-1.47759e-10	-7.0629e-11
		0.02376	-1.68061e-10	-9.77956e-11	-1.22944e-10																0.02376	-1.68061e-10	-1.47781e-10	-7.06237e-11
		0.02378	-1.68065e-10	-9.78054e-11	-1.22934e-10																0.02378	-1.68065e-10	-1.47802e-10	-7.06168e-11
		0.0238	-1.6807e-10	-9.78151e-11	-1.22924e-10																0.0238	-1.6807e-10	-1.47823e-10	-7.06085e-11
		0.02382	-1.68076e-10	-9.78245e-11	-1.22914e-10																0.02382	-1.68076e-10	-1.47843e-10	-7.05989e-11
		0.02384	-1.68081e-10	-9.78336e-11	-1.22904e-10																0.02384	-1.68081e-10	-1.47862e-10	-7.05881e-11
		0.02386	-1.68087e-10	-9.78423e-11	-1.22896e-10																0.02386	-1.68087e-10	-1.47881e-10	-7.05764e-11
		0.02388	-1.68093e-10	-9.78507e-11	-1.22887e-10																0.02388	-1.68093e-10	-1.47899e-10	-7.05638e-11
		0.0239	-1.681e-10	-9.78585e-11	-1.2288e-10																0.0239	-1.681e-10	-1.47916e-10	-7.05504e-11
		0.02392	-1.68107e-10	-9.78659e-11	-1.22873e-10																0.02392	-1.68107e-10	-1.47933e-10	-7.05364e-11
		0.02394	-1.68114e-10	-9.78727e-11	-1.22868e-10																0.02394	-1.68114e-10	-1.47949e-10	-7.0522e-11
		0.02396	-1.68122e-10	-9.78786e-11	-1.22863e-10																0.02396	-1.68122e-10	-1.47964e-10	-7.05072e-11
		0.02398	-1.6813e-10	-9.78835e-11	-1.2286e-10																0.02398	-1.6813e-10	-1.47978e-10	-7.04923e-11
		0.024	-1.68138e-10	-9.78873e-11	-1.22858e-10																0.024	-1.68138e-10	-1.47992e-10	-7.04774e-11
		0.02402	-1.68146e-10	-9.78896e-11	-1.22857e-10																0.02402	-1.68146e-10	-1.48004e-10	-7.04627e-11
		0.02404	-1.68155e-10	-9.78905e-11	-1.22858e-10																0.02404	-1.68155e-10	-1.48016e-10	-7.04482e-11
		0.02406	-1.68163e-10	-9.78898e-11	-1.22861e-10																0.02406	-1.68163e-10	-1.48026e-10	-7.04343e-11
		0.02408	-1.68172e-10	-9.78876e-11	-1.22865e-10																0.02408	-1.68172e-10	-1.48034e-10	-7.04208e-11
		0.0241	-1.6818e-10	-9.78839e-11	-1.22871e-10																0.0241	-1.6818e-10	-1.48041e-10	-7.04081e-11
		0.02412	-1.68187e-10	-9.78787e-11	-1.22878e-10																0.02412	-1.68187e-10	-1.48047e-10	-7.03963e-11
		0.02414	-1.68194e-10	-9.78724e-11	-1.22888e-10																0.02414	-1.68194e-10	-1.48051e-10	-7.03856e-11
		0.02416	-1.68201e-10	-9.78649e-11	-1.229e-10																0.02416	-1.68201e-10	-1.48053e-10	-7.03759e-11
		0.02418	-1.68207e-10	-9.78563e-11	-1.22914e-10																0.02418	-1.68207e-10	-1.48054e-10	-7.03673e-11
		0.0242	-1.68213e-10	-9.78469e-11	-1.22931e-10																0.0242	-1.68213e-10	-1.48054e-10	-7.03598e-11
		0.02422	-1.68219e-10	-9.78366e-11	-1.22949e-10																0.02422	-1.68219e-10	-1.48052e-10	-7.03534e-11
		0.02424	-1.68223e-10	-9.78256e-11	-1.22971e-10																0.02424	-1.68223e-10	-1.48049e-10	-7.03481e-11
		0.02426	-1.68228e-10	-9.78139e-11	-1.22994e-10																0.02426	-1.68228e-10	-1.48046e-10	-7.03439e-11
		0.02428	-1.68231e-10	-9.78019e-11	-1.2302e-10																0.02428	-1.68231e-10	-1.48041e-10	-7.03409e-11
		0.0243	-1.68234e-10	-9.77896e-11	-1.23048e-10																0.0243	-1.68234e-10	-1.48036e-10	-7.03392e-11
		0.02432	-1.68236e-10	-9.77772e-11	-1.23079e-10																0.02432	-1.68236e-10	-1.48031e-10	-7.03389e-11
		0.02434	-1.68236e-10	-9.77648e-11	-1.23113e-10																0.02434	-1.68236e-10	-1.48025e-10	-7.034e-11
		0.02436	-1.68235e-10	-9.77526e-11	-1.23148e-10																0.02436	-1.68235e-10	-1.48019e-10	-7.03427e-11
		0.02438	-1.68234e-10	-9.77406e-11	-1.23185e-10																0.02438	-1.68234e-10	-1.48013e-10	-7.03471e-11
		0.0244	-1.68231e-10	-9.77287e-11	-1.23224e-10																0.0244	-1.68231e-10	-1.48007e-10	-7.03533e-11
		0.02442	-1.68227e-10	-9.77168e-11	-1.23264e-10																0.02442	-1.68227e-10	-1.48001e-10	-7.03613e-11
		0.02444	-1.68222e-10	-9.7705e-11	-1.23306e-10																0.02444	-1.68222e-10	-1.47996e-10	-7.03714e-11
		0.02446	-1.68216e-10	-9.76932e-11	-1.23348e-10																0.02446	-1.68216e-10	-1.47991e-10	-7.03834e-11
		0.02448	-1.6821e-10	-9.76811e-11	-1.2339e-10																0.02448	-1.6821e-10	-1.47986e-10	-7.03973e-11
		0.0245	-1.68203e-10	-9.76688e-11	-1.23433e-10																0.0245	-1.68203e-10	-1.47982e-10	-7.0413e-11
		0.02452	-1.68195e-10	-9.76563e-11	-1.23476e-10																0.02452	-1.68195e-10	-1.47979e-10	-7.04307e-11
		0.02454	-1.68188e-10	-9.76437e-11	-1.23518e-10																0.02454	-1.68188e-10	-1.47976e-10	-7.04502e-11
		0.02456	-1.6818e-10	-9.76309e-11	-1.23559e-10																0.02456	-1.6818e-10	-1.47975e-10	-7.04715e-11
		0.02458	-1.68171e-10	-9.76181e-11	-1.236e-10																0.02458	-1.68171e-10	-1.47974e-10	-7.04947e-11
		0.0246	-1.68162e-10	-9.76054e-11	-1.23639e-10																0.0246	-1.68162e-10	-1.47974e-10	-7.05195e-11
		0.02462	-1.68152e-10	-9.75928e-11	-1.23677e-10																0.02462	-1.68152e-10	-1.47975e-10	-7.0546e-11
		0.02464	-1.68141e-10	-9.75805e-11	-1.23714e-10																0.02464	-1.68141e-10	-1.47977e-10	-7.05739e-11
		0.02466	-1.6813e-10	-9.75683e-11	-1.2375e-10																0.02466	-1.6813e-10	-1.47981e-10	-7.06033e-11
		0.02468	-1.68118e-10	-9.75565e-11	-1.23784e-10																0.02468	-1.68118e-10	-1.47985e-10	-7.06339e-11
		0.0247	-1.68106e-10	-9.75449e-11	-1.23816e-10																0.0247	-1.68106e-10	-1.47991e-10	-7.06658e-11
		0.02472	-1.68094e-10	-9.75336e-11	-1.23846e-10																0.02472	-1.68094e-10	-1.47998e-10	-7.06989e-11
		0.02474	-1.68082e-10	-9.75225e-11	-1.23874e-10																0.02474	-1.68082e-10	-1.48006e-10	-7.07332e-11
		0.02476	-1.68071e-10	-9.75119e-11	-1.239e-10																0.02476	-1.68071e-10	-1.48015e-10	-7.07686e-11
		0.02478	-1.6806e-10	-9.75019e-11	-1.23924e-10																0.02478	-1.6806e-10	-1.48024e-10	-7.0805e-11
		0.0248	-1.6805e-10	-9.74926e-11	-1.23945e-10																0.0248	-1.6805e-10	-1.48035e-10	-7.08422e-11
		0.02482	-1.68041e-10	-9.74841e-11	-1.23964e-10																0.02482	-1.68041e-10	-1.48046e-10	-7.08801e-11
		0.02484	-1.68033e-10	-9.74765e-11	-1.23981e-10																0.02484	-1.68033e-10	-1.48058e-10	-7.09188e-11
		0.02486	-1.68027e-10	-9.74699e-11	-1.23994e-10																0.02486	-1.68027e-10	-1.48071e-10	-7.09579e-11
		0.02488	-1.68023e-10	-9.74643e-11	-1.24006e-10																0.02488	-1.68023e-10	-1.48084e-10	-7.09973e-11
		0.0249	-1.6802e-10	-9.74596e-11	-1.24014e-10																0.0249	-1.6802e-10	-1.48099e-10	-7.1037e-11
		0.02492	-1.68018e-10	-9.74557e-11	-1.2402e-10																0.02492	-1.68018e-10	-1.48114e-10	-7.10768e-11
		0.02494	-1.68016e-10	-9.74526e-11	-1.24022e-10																0.02494	-1.68016e-10	-1.48129e-10	-7.11165e-11
		0.02496	-1.68016e-10	-9.74501e-11	-1.24022e-10																0.02496	-1.68016e-10	-1.48146e-10	-7.11561e-11
		0.02498	-1.68016e-10	-9.74481e-11	-1.24019e-10																0.02498	-1.68016e-10	-1.48162e-10	-7.11955e-11
		0.025	-1.68016e-10	-9.74466e-11	-1.24014e-10																0.025	-1.68016e-10	-1.4818e-10	-7.12346e-11
		0.02502	-1.68016e-10	-9.74454e-11	-1.24006e-10																0.02502	-1.68016e-10	-1.48198e-10	-7.12733e-11
		0.02504	-1.68017e-10	-9.74444e-11	-1.23995e-10																0.02504	-1.68017e-10	-1.48216e-10	-7.13117e-11
		0.02506	-1.68017e-10	-9.74434e-11	-1.23983e-10																0.02506	-1.68017e-10	-1.48235e-10	-7.13497e-11
		0.02508	-1.68017e-10	-9.74426e-11	-1.23968e-10																0.02508	-1.68017e-10	-1.48254e-10	-7.13873e-11
		0.0251	-1.68017e-10	-9.74416e-11	-1.23952e-10																0.0251	-1.68017e-10	-1.48272e-10	-7.14245e-11
		0.02512	-1.68017e-10	-9.74405e-11	-1.23933e-10																0.02512	-1.68017e-10	-1.48291e-10	-7.14613e-11
		0.02514	-1.68016e-10	-9.74392e-11	-1.23913e-10																0.02514	-1.68016e-10	-1.4831e-10	-7.14976e-11
		0.02516	-1.68015e-10	-9.74376e-11	-1.23892e-10																0.02516	-1.68015e-10	-1.48329e-10	-7.15332e-11
		0.02518	-1.68014e-10	-9.74358e-11	-1.23869e-10																0.02518	-1.68014e-10	-1.48348e-10	-7.1568e-11
		0.0252	-1.68012e-10	-9.74337e-11	-1.23845e-10																0.0252	-1.68012e-10	-1.48366e-10	-7.16018e-11
		0.02522	-1.68009e-10	-9.74314e-11	-1.23819e-10																0.02522	-1.68009e-10	-1.48384e-10	-7.16346e-11
		0.02524	-1.68006e-10	-9.74289e-11	-1.23791e-10																0.02524	-1.68006e-10	-1.48402e-10	-7.16661e-11
		0.02526	-1.68003e-10	-9.74263e-11	-1.23763e-10																0.02526	-1.68003e-10	-1.4842e-10	-7.16964e-11
		0.02528	-1.67999e-10	-9.74235e-11	-1.23733e-10																0.02528	-1.67999e-10	-1.48438e-10	-7.17254e-11
		0.0253	-1.67994e-10	-9.74205e-11	-1.23702e-10																0.0253	-1.67994e-10	-1.48455e-10	-7.1753e-11
		0.02532	-1.6799e-10	-9.74174e-11	-1.2367e-10																0.02532	-1.6799e-10	-1.48472e-10	-7.17792e-11
		0.02534	-1.67985e-10	-9.7414e-11	-1.23638e-10																0.02534	-1.67985e-10	-1.48488e-10	-7.18038e-11
		0.02536	-1.6798e-10	-9.74104e-11	-1.23605e-10																0.02536	-1.6798e-10	-1.48503e-10	-7.18268e-11
		0.02538	-1.67975e-10	-9.74066e-11	-1.23571e-10																0.02538	-1.67975e-10	-1.48518e-10	-7.1848e-11
		0.0254	-1.6797e-10	-9.74027e-11	-1.23537e-10																0.0254	-1.6797e-10	-1.48531e-10	-7.18671e-11
		0.02542	-1.67965e-10	-9.73989e-11	-1.23503e-10																0.02542	-1.67965e-10	-1.48544e-10	-7.18842e-11
		0.02544	-1.6796e-10	-9.73951e-11	-1.23469e-10																0.02544	-1.6796e-10	-1.48556e-10	-7.18991e-11
		0.02546	-1.67954e-10	-9.73916e-11	-1.23435e-10																0.02546	-1.67954e-10	-1.48568e-10	-7.19117e-11
		0.02548	-1.67947e-10	-9.73885e-11	-1.23402e-10																0.02548	-1.67947e-10	-1.48578e-10	-7.19221e-11
		0.0255	-1.67941e-10	-9.73859e-11	-1.23369e-10																0.0255	-1.67941e-10	-1.48589e-10	-7.19301e-11
		0.02552	-1.67933e-10	-9.73838e-11	-1.23337e-10																0.02552	-1.67933e-10	-1.48598e-10	-7.19358e-11
		0.02554	-1.67925e-10	-9.73822e-11	-1.23306e-10																0.02554	-1.67925e-10	-1.48608e-10	-7.19393e-11
		0.02556	-1.67917e-10	-9.73811e-11	-1.23275e-10																0.02556	-1.67917e-10	-1.48617e-10	-7.19405e-11
		0.02558	-1.67908e-10	-9.73805e-11	-1.23246e-10																0.02558	-1.67908e-10	-1.48626e-10	-7.19396e-11
		0.0256	-1.67899e-10	-9.73803e-11	-1.23217e-10																0.0256	-1.67899e-10	-1.48635e-10	-7.19365e-11
		0.02562	-1.6789e-10	-9.73807e-11	-1.2319e-10																0.02562	-1.6789e-10	-1.48643e-10	-7.19315e-11
		0.02564	-1.67881e-10	-9.73814e-11	-1.23163e-10																0.02564	-1.67881e-10	-1.48652e-10	-7.19247e-11
		0.02566	-1.67873e-10	-9.73825e-11	-1.23137e-10																0.02566	-1.67873e-10	-1.4866e-10	-7.19161e-11
		0.02568	-1.67864e-10	-9.7384e-11	-1.23111e-10																0.02568	-1.67864e-10	-1.48669e-10	-7.1906e-11
		0.0257	-1.67857e-10	-9.73858e-11	-1.23086e-10																0.0257	-1.67857e-10	-1.48678e-10	-7.18945e-11
		0.02572	-1.6785e-10	-9.73878e-11	-1.23062e-10																0.02572	-1.6785e-10	-1.48687e-10	-7.18819e-11
		0.02574	-1.67844e-10	-9.739e-11	-1.23038e-10																0.02574	-1.67844e-10	-1.48696e-10	-7.18683e-11
		0.02576	-1.67839e-10	-9.73922e-11	-1.23015e-10																0.02576	-1.67839e-10	-1.48705e-10	-7.18538e-11
		0.02578	-1.67834e-10	-9.73945e-11	-1.22992e-10																0.02578	-1.67834e-10	-1.48714e-10	-7.18386e-11
		0.0258	-1.67831e-10	-9.73967e-11	-1.22969e-10																0.0258	-1.67831e-10	-1.48723e-10	-7.18226e-11
		0.02582	-1.67827e-10	-9.73987e-11	-1.22947e-10																0.02582	-1.67827e-10	-1.48732e-10	-7.18061e-11
		0.02584	-1.67825e-10	-9.74005e-11	-1.22925e-10																0.02584	-1.67825e-10	-1.48741e-10	-7.17891e-11
		0.02586	-1.67822e-10	-9.74019e-11	-1.22903e-10																0.02586	-1.67822e-10	-1.48749e-10	-7.17717e-11
		0.02588	-1.6782e-10	-9.74027e-11	-1.22882e-10																0.02588	-1.6782e-10	-1.48757e-10	-7.17539e-11
		0.0259	-1.67818e-10	-9.74028e-11	-1.2286e-10																0.0259	-1.67818e-10	-1.48765e-10	-7.1736e-11
		0.02592	-1.67816e-10	-9.74023e-11	-1.2284e-10																0.02592	-1.67816e-10	-1.48772e-10	-7.1718e-11
		0.02594	-1.67813e-10	-9.74011e-11	-1.22819e-10																0.02594	-1.67813e-10	-1.48779e-10	-7.17001e-11
		0.02596	-1.67811e-10	-9.73994e-11	-1.22798e-10																0.02596	-1.67811e-10	-1.48785e-10	-7.16824e-11
		0.02598	-1.67809e-10	-9.73974e-11	-1.22778e-10																0.02598	-1.67809e-10	-1.48791e-10	-7.16651e-11
		0.026	-1.67806e-10	-9.73954e-11	-1.22757e-10																0.026	-1.67806e-10	-1.48797e-10	-7.16484e-11
		0.02602	-1.67803e-10	-9.73935e-11	-1.22737e-10																0.02602	-1.67803e-10	-1.48802e-10	-7.16324e-11
		0.02604	-1.678e-10	-9.73918e-11	-1.22717e-10																0.02604	-1.678e-10	-1.48806e-10	-7.16173e-11
		0.02606	-1.67797e-10	-9.73904e-11	-1.22698e-10																0.02606	-1.67797e-10	-1.48811e-10	-7.16033e-11
		0.02608	-1.67793e-10	-9.73893e-11	-1.2268e-10																0.02608	-1.67793e-10	-1.48816e-10	-7.15906e-11
		0.0261	-1.6779e-10	-9.73886e-11	-1.22663e-10																0.0261	-1.6779e-10	-1.4882e-10	-7.15793e-11
		0.02612	-1.67786e-10	-9.73883e-11	-1.22646e-10																0.02612	-1.67786e-10	-1.48825e-10	-7.15695e-11
		0.02614	-1.67783e-10	-9.73882e-11	-1.22631e-10																0.02614	-1.67783e-10	-1.4883e-10	-7.15613e-11
		0.02616	-1.67779e-10	-9.73885e-11	-1.22617e-10																0.02616	-1.67779e-10	-1.48835e-10	-7.15549e-11
		0.02618	-1.67775e-10	-9.7389e-11	-1.22604e-10																0.02618	-1.67775e-10	-1.4884e-10	-7.15503e-11
		0.0262	-1.6777e-10	-9.73896e-11	-1.22592e-10																0.0262	-1.6777e-10	-1.48845e-10	-7.15478e-11
		0.02622	-1.67764e-10	-9.73904e-11	-1.22582e-10																0.02622	-1.67764e-10	-1.48849e-10	-7.15474e-11
		0.02624	-1.67758e-10	-9.73914e-11	-1.22573e-10																0.02624	-1.67758e-10	-1.48853e-10	-7.15493e-11
		0.02626	-1.67751e-10	-9.73922e-11	-1.22565e-10																0.02626	-1.67751e-10	-1.48857e-10	-7.15535e-11
		0.02628	-1.67742e-10	-9.73929e-11	-1.22558e-10																0.02628	-1.67742e-10	-1.4886e-10	-7.156e-11
		0.0263	-1.67733e-10	-9.73933e-11	-1.22552e-10																0.0263	-1.67733e-10	-1.48862e-10	-7.15686e-11
		0.02632	-1.67724e-10	-9.73934e-11	-1.22547e-10																0.02632	-1.67724e-10	-1.48863e-10	-7.15795e-11
		0.02634	-1.67714e-10	-9.73931e-11	-1.22544e-10																0.02634	-1.67714e-10	-1.48863e-10	-7.15924e-11
		0.02636	-1.67703e-10	-9.73924e-11	-1.22542e-10																0.02636	-1.67703e-10	-1.48863e-10	-7.16074e-11
		0.02638	-1.67693e-10	-9.73913e-11	-1.22541e-10																0.02638	-1.67693e-10	-1.48862e-10	-7.16243e-11
		0.0264	-1.67682e-10	-9.73901e-11	-1.22542e-10																0.0264	-1.67682e-10	-1.4886e-10	-7.16428e-11
		0.02642	-1.67671e-10	-9.7389e-11	-1.22544e-10																0.02642	-1.67671e-10	-1.48856e-10	-7.16629e-11
		0.02644	-1.67661e-10	-9.73881e-11	-1.22548e-10																0.02644	-1.67661e-10	-1.48852e-10	-7.16845e-11
		0.02646	-1.6765e-10	-9.73876e-11	-1.22553e-10																0.02646	-1.6765e-10	-1.48846e-10	-7.17073e-11
		0.02648	-1.6764e-10	-9.73877e-11	-1.2256e-10																0.02648	-1.6764e-10	-1.48838e-10	-7.17313e-11
		0.0265	-1.67629e-10	-9.73886e-11	-1.22569e-10																0.0265	-1.67629e-10	-1.48829e-10	-7.17562e-11
		0.02652	-1.67619e-10	-9.73901e-11	-1.2258e-10																0.02652	-1.67619e-10	-1.48819e-10	-7.17818e-11
		0.02654	-1.67609e-10	-9.73924e-11	-1.22593e-10																0.02654	-1.67609e-10	-1.48807e-10	-7.18079e-11
		0.02656	-1.67599e-10	-9.73953e-11	-1.22607e-10																0.02656	-1.67599e-10	-1.48794e-10	-7.18342e-11
		0.02658	-1.67589e-10	-9.73985e-11	-1.22624e-10																0.02658	-1.67589e-10	-1.4878e-10	-7.18606e-11
		0.0266	-1.67579e-10	-9.7402e-11	-1.22642e-10																0.0266	-1.67579e-10	-1.48765e-10	-7.1887e-11
		0.02662	-1.67569e-10	-9.74058e-11	-1.22662e-10																0.02662	-1.67569e-10	-1.4875e-10	-7.19133e-11
		0.02664	-1.6756e-10	-9.74097e-11	-1.22683e-10																0.02664	-1.6756e-10	-1.48733e-10	-7.19395e-11
		0.02666	-1.67551e-10	-9.74137e-11	-1.22705e-10																0.02666	-1.67551e-10	-1.48716e-10	-7.19655e-11
		0.02668	-1.67542e-10	-9.74177e-11	-1.22729e-10																0.02668	-1.67542e-10	-1.48699e-10	-7.19913e-11
		0.0267	-1.67534e-10	-9.74218e-11	-1.22753e-10																0.0267	-1.67534e-10	-1.4868e-10	-7.20169e-11
		0.02672	-1.67525e-10	-9.7426e-11	-1.22778e-10																0.02672	-1.67525e-10	-1.48662e-10	-7.20422e-11
		0.02674	-1.67517e-10	-9.74302e-11	-1.22804e-10																0.02674	-1.67517e-10	-1.48643e-10	-7.20673e-11
		0.02676	-1.67509e-10	-9.74346e-11	-1.2283e-10																0.02676	-1.67509e-10	-1.48624e-10	-7.20921e-11
		0.02678	-1.675e-10	-9.74391e-11	-1.22856e-10																0.02678	-1.675e-10	-1.48605e-10	-7.21167e-11
		0.0268	-1.67491e-10	-9.74436e-11	-1.22882e-10																0.0268	-1.67491e-10	-1.48585e-10	-7.21409e-11
		0.02682	-1.67482e-10	-9.74482e-11	-1.22908e-10																0.02682	-1.67482e-10	-1.48566e-10	-7.21649e-11
		0.02684	-1.67472e-10	-9.74528e-11	-1.22934e-10																0.02684	-1.67472e-10	-1.48547e-10	-7.21886e-11
		0.02686	-1.67461e-10	-9.74574e-11	-1.22961e-10																0.02686	-1.67461e-10	-1.48529e-10	-7.2212e-11
		0.02688	-1.6745e-10	-9.74619e-11	-1.22988e-10																0.02688	-1.6745e-10	-1.4851e-10	-7.22353e-11
		0.0269	-1.67438e-10	-9.74663e-11	-1.23016e-10																0.0269	-1.67438e-10	-1.48493e-10	-7.22584e-11
		0.02692	-1.67425e-10	-9.74705e-11	-1.23044e-10																0.02692	-1.67425e-10	-1.48476e-10	-7.22812e-11
		0.02694	-1.67412e-10	-9.74744e-11	-1.23073e-10																0.02694	-1.67412e-10	-1.4846e-10	-7.23038e-11
		0.02696	-1.67398e-10	-9.74781e-11	-1.23102e-10																0.02696	-1.67398e-10	-1.48444e-10	-7.2326e-11
		0.02698	-1.67384e-10	-9.74816e-11	-1.23131e-10																0.02698	-1.67384e-10	-1.4843e-10	-7.23479e-11
		0.027	-1.6737e-10	-9.7485e-11	-1.2316e-10																0.027	-1.6737e-10	-1.48417e-10	-7.23695e-11
		0.02702	-1.67357e-10	-9.74881e-11	-1.23189e-10																0.02702	-1.67357e-10	-1.48405e-10	-7.23907e-11
		0.02704	-1.67344e-10	-9.74912e-11	-1.23217e-10																0.02704	-1.67344e-10	-1.48393e-10	-7.24115e-11
		0.02706	-1.67331e-10	-9.74942e-11	-1.23245e-10																0.02706	-1.67331e-10	-1.48383e-10	-7.24317e-11
		0.02708	-1.67318e-10	-9.74972e-11	-1.23272e-10																0.02708	-1.67318e-10	-1.48373e-10	-7.24512e-11
		0.0271	-1.67307e-10	-9.75003e-11	-1.23298e-10																0.0271	-1.67307e-10	-1.48364e-10	-7.24699e-11
		0.02712	-1.67296e-10	-9.75035e-11	-1.23324e-10																0.02712	-1.67296e-10	-1.48356e-10	-7.24875e-11
		0.02714	-1.67286e-10	-9.75069e-11	-1.23348e-10																0.02714	-1.67286e-10	-1.48349e-10	-7.25041e-11
		0.02716	-1.67277e-10	-9.75107e-11	-1.23371e-10																0.02716	-1.67277e-10	-1.48342e-10	-7.25195e-11
		0.02718	-1.67269e-10	-9.7515e-11	-1.23393e-10																0.02718	-1.67269e-10	-1.48336e-10	-7.25339e-11
		0.0272	-1.67261e-10	-9.75199e-11	-1.23414e-10																0.0272	-1.67261e-10	-1.48331e-10	-7.25473e-11
		0.02722	-1.67254e-10	-9.75253e-11	-1.23434e-10																0.02722	-1.67254e-10	-1.48327e-10	-7.25597e-11
		0.02724	-1.67248e-10	-9.75315e-11	-1.23452e-10																0.02724	-1.67248e-10	-1.48324e-10	-7.25712e-11
		0.02726	-1.67243e-10	-9.75383e-11	-1.23469e-10																0.02726	-1.67243e-10	-1.48322e-10	-7.25819e-11
		0.02728	-1.67239e-10	-9.75459e-11	-1.23485e-10																0.02728	-1.67239e-10	-1.48321e-10	-7.25916e-11
		0.0273	-1.67236e-10	-9.75544e-11	-1.235e-10																0.0273	-1.67236e-10	-1.48322e-10	-7.26005e-11
		0.02732	-1.67234e-10	-9.75636e-11	-1.23514e-10																0.02732	-1.67234e-10	-1.48324e-10	-7.26086e-11
		0.02734	-1.67232e-10	-9.75737e-11	-1.23526e-10																0.02734	-1.67232e-10	-1.48327e-10	-7.2616e-11
		0.02736	-1.67231e-10	-9.75846e-11	-1.23537e-10																0.02736	-1.67231e-10	-1.48331e-10	-7.2623e-11
		0.02738	-1.67231e-10	-9.75961e-11	-1.23548e-10																0.02738	-1.67231e-10	-1.48336e-10	-7.26296e-11
		0.0274	-1.67232e-10	-9.76081e-11	-1.23557e-10																0.0274	-1.67232e-10	-1.48343e-10	-7.26363e-11
		0.02742	-1.67234e-10	-9.76206e-11	-1.23565e-10																0.02742	-1.67234e-10	-1.48351e-10	-7.2643e-11
		0.02744	-1.67236e-10	-9.76334e-11	-1.23572e-10																0.02744	-1.67236e-10	-1.4836e-10	-7.26502e-11
		0.02746	-1.6724e-10	-9.76464e-11	-1.23577e-10																0.02746	-1.6724e-10	-1.4837e-10	-7.2658e-11
		0.02748	-1.67245e-10	-9.76596e-11	-1.23582e-10																0.02748	-1.67245e-10	-1.48381e-10	-7.26664e-11
		0.0275	-1.67251e-10	-9.7673e-11	-1.23585e-10																0.0275	-1.67251e-10	-1.48394e-10	-7.26756e-11
		0.02752	-1.67258e-10	-9.76865e-11	-1.23587e-10																0.02752	-1.67258e-10	-1.48407e-10	-7.26856e-11
		0.02754	-1.67266e-10	-9.77001e-11	-1.23589e-10																0.02754	-1.67266e-10	-1.48421e-10	-7.26964e-11
		0.02756	-1.67276e-10	-9.77138e-11	-1.23589e-10																0.02756	-1.67276e-10	-1.48436e-10	-7.27079e-11
		0.02758	-1.67288e-10	-9.77277e-11	-1.23589e-10																0.02758	-1.67288e-10	-1.48452e-10	-7.272e-11
		0.0276	-1.67301e-10	-9.77418e-11	-1.23588e-10																0.0276	-1.67301e-10	-1.48468e-10	-7.27324e-11
		0.02762	-1.67315e-10	-9.7756e-11	-1.23587e-10																0.02762	-1.67315e-10	-1.48486e-10	-7.2745e-11
		0.02764	-1.67331e-10	-9.77705e-11	-1.23585e-10																0.02764	-1.67331e-10	-1.48503e-10	-7.27576e-11
		0.02766	-1.67347e-10	-9.77852e-11	-1.23582e-10																0.02766	-1.67347e-10	-1.48521e-10	-7.277e-11
		0.02768	-1.67363e-10	-9.78001e-11	-1.2358e-10																0.02768	-1.67363e-10	-1.4854e-10	-7.27819e-11
		0.0277	-1.6738e-10	-9.78154e-11	-1.23577e-10																0.0277	-1.6738e-10	-1.48559e-10	-7.27933e-11
		0.02772	-1.67396e-10	-9.78309e-11	-1.23574e-10																0.02772	-1.67396e-10	-1.48578e-10	-7.2804e-11
		0.02774	-1.67413e-10	-9.78466e-11	-1.23571e-10																0.02774	-1.67413e-10	-1.48598e-10	-7.2814e-11
		0.02776	-1.67429e-10	-9.78625e-11	-1.23568e-10																0.02776	-1.67429e-10	-1.48618e-10	-7.28233e-11
		0.02778	-1.67445e-10	-9.78787e-11	-1.23566e-10																0.02778	-1.67445e-10	-1.48638e-10	-7.28318e-11
		0.0278	-1.6746e-10	-9.78954e-11	-1.23564e-10																0.0278	-1.6746e-10	-1.48658e-10	-7.28395e-11
		0.02782	-1.67476e-10	-9.79125e-11	-1.23562e-10																0.02782	-1.67476e-10	-1.48679e-10	-7.28462e-11
		0.02784	-1.6749e-10	-9.79303e-11	-1.23561e-10																0.02784	-1.6749e-10	-1.48699e-10	-7.28521e-11
		0.02786	-1.67504e-10	-9.79489e-11	-1.2356e-10																0.02786	-1.67504e-10	-1.4872e-10	-7.2857e-11
		0.02788	-1.67518e-10	-9.79683e-11	-1.2356e-10																0.02788	-1.67518e-10	-1.4874e-10	-7.28609e-11
		0.0279	-1.67531e-10	-9.79888e-11	-1.2356e-10																0.0279	-1.67531e-10	-1.48761e-10	-7.28635e-11
		0.02792	-1.67542e-10	-9.80102e-11	-1.2356e-10																0.02792	-1.67542e-10	-1.4878e-10	-7.2865e-11
		0.02794	-1.67553e-10	-9.80327e-11	-1.23561e-10																0.02794	-1.67553e-10	-1.488e-10	-7.28653e-11
		0.02796	-1.67562e-10	-9.80559e-11	-1.23562e-10																0.02796	-1.67562e-10	-1.48819e-10	-7.28643e-11
		0.02798	-1.6757e-10	-9.80797e-11	-1.23563e-10																0.02798	-1.6757e-10	-1.48837e-10	-7.28622e-11
		0.028	-1.67577e-10	-9.8104e-11	-1.23565e-10																0.028	-1.67577e-10	-1.48855e-10	-7.28588e-11
		0.02802	-1.67582e-10	-9.81285e-11	-1.23567e-10																0.02802	-1.67582e-10	-1.48872e-10	-7.28541e-11
		0.02804	-1.67587e-10	-9.8153e-11	-1.23569e-10																0.02804	-1.67587e-10	-1.48889e-10	-7.28482e-11
		0.02806	-1.67591e-10	-9.81773e-11	-1.23571e-10																0.02806	-1.67591e-10	-1.48904e-10	-7.2841e-11
		0.02808	-1.67593e-10	-9.82013e-11	-1.23572e-10																0.02808	-1.67593e-10	-1.48918e-10	-7.28325e-11
		0.0281	-1.67595e-10	-9.82248e-11	-1.23573e-10																0.0281	-1.67595e-10	-1.48931e-10	-7.28225e-11
		0.02812	-1.67595e-10	-9.82477e-11	-1.23574e-10																0.02812	-1.67595e-10	-1.48943e-10	-7.28113e-11
		0.02814	-1.67593e-10	-9.82697e-11	-1.23573e-10																0.02814	-1.67593e-10	-1.48953e-10	-7.27987e-11
		0.02816	-1.6759e-10	-9.82909e-11	-1.23572e-10																0.02816	-1.6759e-10	-1.48962e-10	-7.27848e-11
		0.02818	-1.67585e-10	-9.8311e-11	-1.2357e-10																0.02818	-1.67585e-10	-1.4897e-10	-7.27696e-11
		0.0282	-1.67579e-10	-9.83301e-11	-1.23568e-10																0.0282	-1.67579e-10	-1.48975e-10	-7.27533e-11
		0.02822	-1.67572e-10	-9.8348e-11	-1.23565e-10																0.02822	-1.67572e-10	-1.48979e-10	-7.27359e-11
		0.02824	-1.67563e-10	-9.83649e-11	-1.23561e-10																0.02824	-1.67563e-10	-1.48982e-10	-7.27175e-11
		0.02826	-1.67554e-10	-9.83807e-11	-1.23556e-10																0.02826	-1.67554e-10	-1.48983e-10	-7.26981e-11
		0.02828	-1.67544e-10	-9.83953e-11	-1.23551e-10																0.02828	-1.67544e-10	-1.48982e-10	-7.26781e-11
		0.0283	-1.67533e-10	-9.84089e-11	-1.23545e-10																0.0283	-1.67533e-10	-1.4898e-10	-7.26574e-11
		0.02832	-1.67521e-10	-9.84212e-11	-1.23539e-10																0.02832	-1.67521e-10	-1.48975e-10	-7.26363e-11
		0.02834	-1.67509e-10	-9.84322e-11	-1.23532e-10																0.02834	-1.67509e-10	-1.48969e-10	-7.26151e-11
		0.02836	-1.67497e-10	-9.84419e-11	-1.23524e-10																0.02836	-1.67497e-10	-1.4896e-10	-7.25939e-11
		0.02838	-1.67483e-10	-9.84503e-11	-1.23516e-10																0.02838	-1.67483e-10	-1.4895e-10	-7.2573e-11
		0.0284	-1.67469e-10	-9.84571e-11	-1.23507e-10																0.0284	-1.67469e-10	-1.48937e-10	-7.25526e-11
		0.02842	-1.67455e-10	-9.84623e-11	-1.23498e-10																0.02842	-1.67455e-10	-1.48922e-10	-7.25329e-11
		0.02844	-1.67441e-10	-9.84659e-11	-1.23488e-10																0.02844	-1.67441e-10	-1.48906e-10	-7.25141e-11
		0.02846	-1.67427e-10	-9.84677e-11	-1.23478e-10																0.02846	-1.67427e-10	-1.48887e-10	-7.24962e-11
		0.02848	-1.67412e-10	-9.84677e-11	-1.23468e-10																0.02848	-1.67412e-10	-1.48868e-10	-7.24796e-11
		0.0285	-1.67398e-10	-9.84658e-11	-1.23458e-10																0.0285	-1.67398e-10	-1.48847e-10	-7.24643e-11
		0.02852	-1.67384e-10	-9.8462e-11	-1.23447e-10																0.02852	-1.67384e-10	-1.48824e-10	-7.24505e-11
		0.02854	-1.67371e-10	-9.84563e-11	-1.23437e-10																0.02854	-1.67371e-10	-1.488e-10	-7.24383e-11
		0.02856	-1.67358e-10	-9.84488e-11	-1.23426e-10																0.02856	-1.67358e-10	-1.48775e-10	-7.24279e-11
		0.02858	-1.67346e-10	-9.84395e-11	-1.23416e-10																0.02858	-1.67346e-10	-1.48749e-10	-7.24195e-11
		0.0286	-1.67335e-10	-9.84286e-11	-1.23405e-10																0.0286	-1.67335e-10	-1.48721e-10	-7.24131e-11
		0.02862	-1.67324e-10	-9.8416e-11	-1.23394e-10																0.02862	-1.67324e-10	-1.48692e-10	-7.24088e-11
		0.02864	-1.67315e-10	-9.84021e-11	-1.23384e-10																0.02864	-1.67315e-10	-1.48662e-10	-7.24068e-11
		0.02866	-1.67307e-10	-9.83868e-11	-1.23374e-10																0.02866	-1.67307e-10	-1.48631e-10	-7.24069e-11
		0.02868	-1.673e-10	-9.83703e-11	-1.23364e-10																0.02868	-1.673e-10	-1.48599e-10	-7.24094e-11
		0.0287	-1.67294e-10	-9.83526e-11	-1.23355e-10																0.0287	-1.67294e-10	-1.48567e-10	-7.24142e-11
		0.02872	-1.6729e-10	-9.83338e-11	-1.23346e-10																0.02872	-1.6729e-10	-1.48533e-10	-7.24214e-11
		0.02874	-1.67287e-10	-9.83141e-11	-1.23338e-10																0.02874	-1.67287e-10	-1.48499e-10	-7.2431e-11
		0.02876	-1.67286e-10	-9.82934e-11	-1.23331e-10																0.02876	-1.67286e-10	-1.48465e-10	-7.2443e-11
		0.02878	-1.67286e-10	-9.8272e-11	-1.23325e-10																0.02878	-1.67286e-10	-1.4843e-10	-7.24573e-11
		0.0288	-1.67288e-10	-9.82499e-11	-1.2332e-10																0.0288	-1.67288e-10	-1.48395e-10	-7.2474e-11
		0.02882	-1.67291e-10	-9.82273e-11	-1.23316e-10																0.02882	-1.67291e-10	-1.48359e-10	-7.24929e-11
		0.02884	-1.67296e-10	-9.82041e-11	-1.23313e-10																0.02884	-1.67296e-10	-1.48324e-10	-7.25139e-11
		0.02886	-1.67302e-10	-9.81805e-11	-1.23311e-10																0.02886	-1.67302e-10	-1.48288e-10	-7.25368e-11
		0.02888	-1.67311e-10	-9.81566e-11	-1.2331e-10																0.02888	-1.67311e-10	-1.48252e-10	-7.25614e-11
		0.0289	-1.6732e-10	-9.81324e-11	-1.2331e-10																0.0289	-1.6732e-10	-1.48216e-10	-7.25875e-11
		0.02892	-1.67332e-10	-9.81081e-11	-1.23312e-10																0.02892	-1.67332e-10	-1.4818e-10	-7.26148e-11
		0.02894	-1.67345e-10	-9.80839e-11	-1.23315e-10																0.02894	-1.67345e-10	-1.48144e-10	-7.26431e-11
		0.02896	-1.6736e-10	-9.80597e-11	-1.23319e-10																0.02896	-1.6736e-10	-1.48108e-10	-7.26722e-11
		0.02898	-1.67376e-10	-9.80358e-11	-1.23325e-10																0.02898	-1.67376e-10	-1.48072e-10	-7.27018e-11
		0.029	-1.67394e-10	-9.80121e-11	-1.23333e-10																0.029	-1.67394e-10	-1.48036e-10	-7.27317e-11
		0.02902	-1.67413e-10	-9.79888e-11	-1.23342e-10																0.02902	-1.67413e-10	-1.48e-10	-7.27616e-11
		0.02904	-1.67433e-10	-9.79659e-11	-1.23353e-10																0.02904	-1.67433e-10	-1.47965e-10	-7.27914e-11
		0.02906	-1.67453e-10	-9.79432e-11	-1.23365e-10																0.02906	-1.67453e-10	-1.47929e-10	-7.28211e-11
		0.02908	-1.67475e-10	-9.79208e-11	-1.2338e-10																0.02908	-1.67475e-10	-1.47895e-10	-7.28504e-11
		0.0291	-1.67497e-10	-9.78987e-11	-1.23396e-10																0.0291	-1.67497e-10	-1.47861e-10	-7.28794e-11
		0.02912	-1.6752e-10	-9.78767e-11	-1.23413e-10																0.02912	-1.6752e-10	-1.47827e-10	-7.2908e-11
		0.02914	-1.67544e-10	-9.78547e-11	-1.23432e-10																0.02914	-1.67544e-10	-1.47794e-10	-7.2936e-11
		0.02916	-1.67569e-10	-9.78326e-11	-1.23452e-10																0.02916	-1.67569e-10	-1.47762e-10	-7.29634e-11
		0.02918	-1.67593e-10	-9.78103e-11	-1.23473e-10																0.02918	-1.67593e-10	-1.4773e-10	-7.29899e-11
		0.0292	-1.67619e-10	-9.77877e-11	-1.23496e-10																0.0292	-1.67619e-10	-1.47699e-10	-7.30155e-11
		0.02922	-1.67644e-10	-9.7765e-11	-1.23519e-10																0.02922	-1.67644e-10	-1.47668e-10	-7.30399e-11
		0.02924	-1.67669e-10	-9.7742e-11	-1.23543e-10																0.02924	-1.67669e-10	-1.47638e-10	-7.3063e-11
		0.02926	-1.67695e-10	-9.77187e-11	-1.23568e-10																0.02926	-1.67695e-10	-1.4761e-10	-7.30846e-11
		0.02928	-1.6772e-10	-9.76951e-11	-1.23594e-10																0.02928	-1.6772e-10	-1.47582e-10	-7.31047e-11
		0.0293	-1.67744e-10	-9.76711e-11	-1.2362e-10																0.0293	-1.67744e-10	-1.47555e-10	-7.31231e-11
		0.02932	-1.67769e-10	-9.76469e-11	-1.23647e-10																0.02932	-1.67769e-10	-1.47529e-10	-7.31397e-11
		0.02934	-1.67792e-10	-9.76224e-11	-1.23675e-10																0.02934	-1.67792e-10	-1.47505e-10	-7.31546e-11
		0.02936	-1.67815e-10	-9.75979e-11	-1.23702e-10																0.02936	-1.67815e-10	-1.47482e-10	-7.31675e-11
		0.02938	-1.67838e-10	-9.75734e-11	-1.23731e-10																0.02938	-1.67838e-10	-1.47461e-10	-7.31785e-11
		0.0294	-1.67859e-10	-9.7549e-11	-1.23759e-10																0.0294	-1.67859e-10	-1.47441e-10	-7.31874e-11
		0.02942	-1.6788e-10	-9.75249e-11	-1.23788e-10																0.02942	-1.6788e-10	-1.47423e-10	-7.31941e-11
		0.02944	-1.679e-10	-9.75012e-11	-1.23817e-10																0.02944	-1.679e-10	-1.47407e-10	-7.31985e-11
		0.02946	-1.67919e-10	-9.7478e-11	-1.23846e-10																0.02946	-1.67919e-10	-1.47392e-10	-7.32005e-11
		0.02948	-1.67937e-10	-9.74553e-11	-1.23875e-10																0.02948	-1.67937e-10	-1.47378e-10	-7.31999e-11
		0.0295	-1.67954e-10	-9.74332e-11	-1.23905e-10																0.0295	-1.67954e-10	-1.47367e-10	-7.31969e-11
		0.02952	-1.67968e-10	-9.74117e-11	-1.23934e-10																0.02952	-1.67968e-10	-1.47356e-10	-7.31914e-11
		0.02954	-1.67981e-10	-9.73911e-11	-1.23963e-10																0.02954	-1.67981e-10	-1.47348e-10	-7.31835e-11
		0.02956	-1.67992e-10	-9.73713e-11	-1.23992e-10																0.02956	-1.67992e-10	-1.4734e-10	-7.31733e-11
		0.02958	-1.68001e-10	-9.73524e-11	-1.24021e-10																0.02958	-1.68001e-10	-1.47335e-10	-7.31611e-11
		0.0296	-1.68008e-10	-9.73345e-11	-1.24049e-10																0.0296	-1.68008e-10	-1.4733e-10	-7.3147e-11
		0.02962	-1.68013e-10	-9.73177e-11	-1.24078e-10																0.02962	-1.68013e-10	-1.47327e-10	-7.31311e-11
		0.02964	-1.68016e-10	-9.73019e-11	-1.24106e-10																0.02964	-1.68016e-10	-1.47326e-10	-7.31137e-11
		0.02966	-1.68016e-10	-9.72872e-11	-1.24134e-10																0.02966	-1.68016e-10	-1.47325e-10	-7.3095e-11
		0.02968	-1.68014e-10	-9.72737e-11	-1.24161e-10																0.02968	-1.68014e-10	-1.47327e-10	-7.30751e-11
		0.0297	-1.6801e-10	-9.72614e-11	-1.24188e-10																0.0297	-1.6801e-10	-1.47329e-10	-7.3054e-11
		0.02972	-1.68004e-10	-9.72503e-11	-1.24214e-10																0.02972	-1.68004e-10	-1.47333e-10	-7.30319e-11
		0.02974	-1.67996e-10	-9.72403e-11	-1.24238e-10																0.02974	-1.67996e-10	-1.47338e-10	-7.30088e-11
		0.02976	-1.67987e-10	-9.72317e-11	-1.24262e-10																0.02976	-1.67987e-10	-1.47344e-10	-7.29845e-11
		0.02978	-1.67975e-10	-9.72242e-11	-1.24285e-10																0.02978	-1.67975e-10	-1.47351e-10	-7.29593e-11
		0.0298	-1.67962e-10	-9.72179e-11	-1.24307e-10																0.0298	-1.67962e-10	-1.4736e-10	-7.29331e-11
		0.02982	-1.67947e-10	-9.72127e-11	-1.24327e-10																0.02982	-1.67947e-10	-1.4737e-10	-7.29061e-11
		0.02984	-1.6793e-10	-9.72085e-11	-1.24347e-10																0.02984	-1.6793e-10	-1.47382e-10	-7.28787e-11
		0.02986	-1.67912e-10	-9.72053e-11	-1.24367e-10																0.02986	-1.67912e-10	-1.47395e-10	-7.28511e-11
		0.02988	-1.67893e-10	-9.7203e-11	-1.24385e-10																0.02988	-1.67893e-10	-1.47409e-10	-7.28236e-11
		0.0299	-1.67874e-10	-9.72015e-11	-1.24403e-10																0.0299	-1.67874e-10	-1.47425e-10	-7.27965e-11
		0.02992	-1.67853e-10	-9.72006e-11	-1.2442e-10																0.02992	-1.67853e-10	-1.47443e-10	-7.277e-11
		0.02994	-1.67832e-10	-9.72004e-11	-1.24437e-10																0.02994	-1.67832e-10	-1.47463e-10	-7.27444e-11
		0.02996	-1.67812e-10	-9.72006e-11	-1.24452e-10																0.02996	-1.67812e-10	-1.47484e-10	-7.27196e-11
		0.02998	-1.67791e-10	-9.72012e-11	-1.24467e-10																0.02998	-1.67791e-10	-1.47506e-10	-7.26958e-11
		0.03	-1.67769e-10	-9.72021e-11	-1.24481e-10																0.03	-1.67769e-10	-1.4753e-10	-7.26728e-11
		0.03002	-1.67748e-10	-9.72033e-11	-1.24493e-10																0.03002	-1.67748e-10	-1.47555e-10	-7.26508e-11
		0.03004	-1.67727e-10	-9.72047e-11	-1.24505e-10																0.03004	-1.67727e-10	-1.4758e-10	-7.26297e-11
		0.03006	-1.67706e-10	-9.72064e-11	-1.24515e-10																0.03006	-1.67706e-10	-1.47607e-10	-7.26096e-11
		0.03008	-1.67686e-10	-9.72081e-11	-1.24524e-10																0.03008	-1.67686e-10	-1.47634e-10	-7.25906e-11
		0.0301	-1.67666e-10	-9.72098e-11	-1.24532e-10																0.0301	-1.67666e-10	-1.47662e-10	-7.25727e-11
		0.03012	-1.67648e-10	-9.72116e-11	-1.24539e-10																0.03012	-1.67648e-10	-1.4769e-10	-7.25561e-11
		0.03014	-1.67632e-10	-9.72133e-11	-1.24545e-10																0.03014	-1.67632e-10	-1.47718e-10	-7.25409e-11
		0.03016	-1.67617e-10	-9.7215e-11	-1.2455e-10																0.03016	-1.67617e-10	-1.47747e-10	-7.25273e-11
		0.03018	-1.67605e-10	-9.72167e-11	-1.24553e-10																0.03018	-1.67605e-10	-1.47775e-10	-7.25154e-11
		0.0302	-1.67594e-10	-9.72184e-11	-1.24556e-10																0.0302	-1.67594e-10	-1.47804e-10	-7.25054e-11
		0.03022	-1.67585e-10	-9.72201e-11	-1.24557e-10																0.03022	-1.67585e-10	-1.47833e-10	-7.24973e-11
		0.03024	-1.67578e-10	-9.72218e-11	-1.24557e-10																0.03024	-1.67578e-10	-1.47862e-10	-7.24912e-11
		0.03026	-1.67572e-10	-9.72234e-11	-1.24557e-10																0.03026	-1.67572e-10	-1.47891e-10	-7.2487e-11
		0.03028	-1.67568e-10	-9.72247e-11	-1.24555e-10																0.03028	-1.67568e-10	-1.4792e-10	-7.24847e-11
		0.0303	-1.67566e-10	-9.72255e-11	-1.24553e-10																0.0303	-1.67566e-10	-1.47949e-10	-7.24842e-11
		0.03032	-1.67565e-10	-9.72259e-11	-1.2455e-10																0.03032	-1.67565e-10	-1.47978e-10	-7.24854e-11
		0.03034	-1.67565e-10	-9.72258e-11	-1.24546e-10																0.03034	-1.67565e-10	-1.48006e-10	-7.2488e-11
		0.03036	-1.67566e-10	-9.7225e-11	-1.24542e-10																0.03036	-1.67566e-10	-1.48035e-10	-7.24919e-11
		0.03038	-1.67568e-10	-9.72237e-11	-1.24538e-10																0.03038	-1.67568e-10	-1.48064e-10	-7.2497e-11
		0.0304	-1.67572e-10	-9.72219e-11	-1.24534e-10																0.0304	-1.67572e-10	-1.48093e-10	-7.25032e-11
		0.03042	-1.67577e-10	-9.72195e-11	-1.24529e-10																0.03042	-1.67577e-10	-1.48122e-10	-7.25105e-11
		0.03044	-1.67583e-10	-9.72166e-11	-1.24525e-10																0.03044	-1.67583e-10	-1.4815e-10	-7.25187e-11
		0.03046	-1.6759e-10	-9.72132e-11	-1.2452e-10																0.03046	-1.6759e-10	-1.48179e-10	-7.25279e-11
		0.03048	-1.67598e-10	-9.72094e-11	-1.24516e-10																0.03048	-1.67598e-10	-1.48207e-10	-7.2538e-11
		0.0305	-1.67608e-10	-9.72051e-11	-1.24512e-10																0.0305	-1.67608e-10	-1.48235e-10	-7.25488e-11
		0.03052	-1.67618e-10	-9.72005e-11	-1.24508e-10																0.03052	-1.67618e-10	-1.48262e-10	-7.25603e-11
		0.03054	-1.6763e-10	-9.71957e-11	-1.24505e-10																0.03054	-1.6763e-10	-1.48289e-10	-7.25724e-11
		0.03056	-1.67643e-10	-9.71905e-11	-1.24502e-10																0.03056	-1.67643e-10	-1.48316e-10	-7.25849e-11
		0.03058	-1.67657e-10	-9.71851e-11	-1.24501e-10																0.03058	-1.67657e-10	-1.48342e-10	-7.25978e-11
		0.0306	-1.67672e-10	-9.71793e-11	-1.245e-10																0.0306	-1.67672e-10	-1.48368e-10	-7.2611e-11
		0.03062	-1.67688e-10	-9.71733e-11	-1.245e-10																0.03062	-1.67688e-10	-1.48393e-10	-7.26245e-11
		0.03064	-1.67704e-10	-9.7167e-11	-1.24502e-10																0.03064	-1.67704e-10	-1.48417e-10	-7.26382e-11
		0.03066	-1.67721e-10	-9.71603e-11	-1.24505e-10																0.03066	-1.67721e-10	-1.4844e-10	-7.26519e-11
		0.03068	-1.67738e-10	-9.71535e-11	-1.2451e-10																0.03068	-1.67738e-10	-1.48463e-10	-7.26657e-11
		0.0307	-1.67755e-10	-9.71463e-11	-1.24516e-10																0.0307	-1.67755e-10	-1.48484e-10	-7.26793e-11
		0.03072	-1.67772e-10	-9.7139e-11	-1.24524e-10																0.03072	-1.67772e-10	-1.48505e-10	-7.26927e-11
		0.03074	-1.67789e-10	-9.71314e-11	-1.24534e-10																0.03074	-1.67789e-10	-1.48524e-10	-7.27058e-11
		0.03076	-1.67805e-10	-9.71236e-11	-1.24545e-10																0.03076	-1.67805e-10	-1.48541e-10	-7.27187e-11
		0.03078	-1.6782e-10	-9.71154e-11	-1.24558e-10																0.03078	-1.6782e-10	-1.48558e-10	-7.27311e-11
		0.0308	-1.67835e-10	-9.71068e-11	-1.24573e-10																0.0308	-1.67835e-10	-1.48573e-10	-7.2743e-11
		0.03082	-1.6785e-10	-9.70979e-11	-1.24588e-10																0.03082	-1.6785e-10	-1.48587e-10	-7.27544e-11
		0.03084	-1.67864e-10	-9.70887e-11	-1.24604e-10																0.03084	-1.67864e-10	-1.48599e-10	-7.27652e-11
		0.03086	-1.67876e-10	-9.70794e-11	-1.24622e-10																0.03086	-1.67876e-10	-1.4861e-10	-7.27754e-11
		0.03088	-1.67888e-10	-9.70699e-11	-1.2464e-10																0.03088	-1.67888e-10	-1.48619e-10	-7.2785e-11
		0.0309	-1.67899e-10	-9.70606e-11	-1.24659e-10																0.0309	-1.67899e-10	-1.48627e-10	-7.27942e-11
		0.03092	-1.67909e-10	-9.70513e-11	-1.24678e-10																0.03092	-1.67909e-10	-1.48633e-10	-7.28028e-11
		0.03094	-1.67918e-10	-9.70423e-11	-1.24698e-10																0.03094	-1.67918e-10	-1.48638e-10	-7.28108e-11
		0.03096	-1.67927e-10	-9.70334e-11	-1.24718e-10																0.03096	-1.67927e-10	-1.48641e-10	-7.28185e-11
		0.03098	-1.67934e-10	-9.7025e-11	-1.24738e-10																0.03098	-1.67934e-10	-1.48643e-10	-7.28257e-11
		0.031	-1.67941e-10	-9.70168e-11	-1.24758e-10																0.031	-1.67941e-10	-1.48643e-10	-7.28325e-11
		0.03102	-1.67946e-10	-9.7009e-11	-1.24779e-10																0.03102	-1.67946e-10	-1.48643e-10	-7.28389e-11
		0.03104	-1.6795e-10	-9.70017e-11	-1.24799e-10																0.03104	-1.6795e-10	-1.48641e-10	-7.28449e-11
		0.03106	-1.67954e-10	-9.6995e-11	-1.24819e-10																0.03106	-1.67954e-10	-1.48638e-10	-7.28505e-11
		0.03108	-1.67956e-10	-9.69889e-11	-1.24839e-10																0.03108	-1.67956e-10	-1.48635e-10	-7.28555e-11
		0.0311	-1.67957e-10	-9.69835e-11	-1.24858e-10																0.0311	-1.67957e-10	-1.4863e-10	-7.286e-11
		0.03112	-1.67956e-10	-9.6979e-11	-1.24878e-10																0.03112	-1.67956e-10	-1.48625e-10	-7.2864e-11
		0.03114	-1.67954e-10	-9.69755e-11	-1.24897e-10																0.03114	-1.67954e-10	-1.48619e-10	-7.28674e-11
		0.03116	-1.6795e-10	-9.69731e-11	-1.24917e-10																0.03116	-1.6795e-10	-1.48613e-10	-7.28702e-11
		0.03118	-1.67944e-10	-9.6972e-11	-1.24935e-10																0.03118	-1.67944e-10	-1.48605e-10	-7.28724e-11
		0.0312	-1.67937e-10	-9.69721e-11	-1.24954e-10																0.0312	-1.67937e-10	-1.48598e-10	-7.28742e-11
		0.03122	-1.67927e-10	-9.69737e-11	-1.24972e-10																0.03122	-1.67927e-10	-1.48589e-10	-7.28754e-11
		0.03124	-1.67916e-10	-9.69766e-11	-1.2499e-10																0.03124	-1.67916e-10	-1.4858e-10	-7.28762e-11
		0.03126	-1.67904e-10	-9.6981e-11	-1.25007e-10																0.03126	-1.67904e-10	-1.4857e-10	-7.28768e-11
		0.03128	-1.67889e-10	-9.69868e-11	-1.25024e-10																0.03128	-1.67889e-10	-1.4856e-10	-7.28771e-11
		0.0313	-1.67873e-10	-9.6994e-11	-1.25041e-10																0.0313	-1.67873e-10	-1.48549e-10	-7.28773e-11
		0.03132	-1.67855e-10	-9.70023e-11	-1.25057e-10																0.03132	-1.67855e-10	-1.48537e-10	-7.28774e-11
		0.03134	-1.67836e-10	-9.70119e-11	-1.25072e-10																0.03134	-1.67836e-10	-1.48526e-10	-7.28777e-11
		0.03136	-1.67814e-10	-9.70226e-11	-1.25085e-10																0.03136	-1.67814e-10	-1.48514e-10	-7.28781e-11
		0.03138	-1.67792e-10	-9.70343e-11	-1.25098e-10																0.03138	-1.67792e-10	-1.48502e-10	-7.28787e-11
		0.0314	-1.67767e-10	-9.7047e-11	-1.2511e-10																0.0314	-1.67767e-10	-1.4849e-10	-7.28796e-11
		0.03142	-1.67741e-10	-9.70607e-11	-1.2512e-10																0.03142	-1.67741e-10	-1.48479e-10	-7.28807e-11
		0.03144	-1.67713e-10	-9.70755e-11	-1.25129e-10																0.03144	-1.67713e-10	-1.48467e-10	-7.28821e-11
		0.03146	-1.67684e-10	-9.70912e-11	-1.25137e-10																0.03146	-1.67684e-10	-1.48456e-10	-7.28839e-11
		0.03148	-1.67654e-10	-9.71079e-11	-1.25144e-10																0.03148	-1.67654e-10	-1.48446e-10	-7.28859e-11
		0.0315	-1.67623e-10	-9.71256e-11	-1.2515e-10																0.0315	-1.67623e-10	-1.48435e-10	-7.28882e-11
		0.03152	-1.67591e-10	-9.71441e-11	-1.25154e-10																0.03152	-1.67591e-10	-1.48425e-10	-7.28907e-11
		0.03154	-1.67558e-10	-9.71634e-11	-1.25157e-10																0.03154	-1.67558e-10	-1.48415e-10	-7.28932e-11
		0.03156	-1.67524e-10	-9.71833e-11	-1.2516e-10																0.03156	-1.67524e-10	-1.48406e-10	-7.28958e-11
		0.03158	-1.67489e-10	-9.72038e-11	-1.2516e-10																0.03158	-1.67489e-10	-1.48398e-10	-7.28983e-11
		0.0316	-1.67454e-10	-9.72247e-11	-1.2516e-10																0.0316	-1.67454e-10	-1.4839e-10	-7.29008e-11
		0.03162	-1.67419e-10	-9.72458e-11	-1.25158e-10																0.03162	-1.67419e-10	-1.48382e-10	-7.2903e-11
		0.03164	-1.67383e-10	-9.7267e-11	-1.25156e-10																0.03164	-1.67383e-10	-1.48375e-10	-7.29052e-11
		0.03166	-1.67348e-10	-9.72883e-11	-1.25151e-10																0.03166	-1.67348e-10	-1.48369e-10	-7.29072e-11
		0.03168	-1.67313e-10	-9.73094e-11	-1.25146e-10																0.03168	-1.67313e-10	-1.48363e-10	-7.29091e-11
		0.0317	-1.67278e-10	-9.73304e-11	-1.2514e-10																0.0317	-1.67278e-10	-1.48358e-10	-7.29109e-11
		0.03172	-1.67244e-10	-9.73511e-11	-1.25133e-10																0.03172	-1.67244e-10	-1.48354e-10	-7.29126e-11
		0.03174	-1.67211e-10	-9.73715e-11	-1.25125e-10																0.03174	-1.67211e-10	-1.48349e-10	-7.29142e-11
		0.03176	-1.67179e-10	-9.73915e-11	-1.25116e-10																0.03176	-1.67179e-10	-1.48345e-10	-7.29158e-11
		0.03178	-1.67148e-10	-9.7411e-11	-1.25106e-10																0.03178	-1.67148e-10	-1.48342e-10	-7.29175e-11
		0.0318	-1.67117e-10	-9.74298e-11	-1.25095e-10																0.0318	-1.67117e-10	-1.48338e-10	-7.29192e-11
		0.03182	-1.67088e-10	-9.74481e-11	-1.25083e-10																0.03182	-1.67088e-10	-1.48335e-10	-7.29209e-11
		0.03184	-1.6706e-10	-9.74655e-11	-1.2507e-10																0.03184	-1.6706e-10	-1.48331e-10	-7.29227e-11
		0.03186	-1.67032e-10	-9.7482e-11	-1.25056e-10																0.03186	-1.67032e-10	-1.48328e-10	-7.29245e-11
		0.03188	-1.67006e-10	-9.74976e-11	-1.25041e-10																0.03188	-1.67006e-10	-1.48324e-10	-7.29262e-11
		0.0319	-1.6698e-10	-9.75121e-11	-1.25026e-10																0.0319	-1.6698e-10	-1.4832e-10	-7.2928e-11
		0.03192	-1.66956e-10	-9.75256e-11	-1.25009e-10																0.03192	-1.66956e-10	-1.48317e-10	-7.29297e-11
		0.03194	-1.66932e-10	-9.75381e-11	-1.24992e-10																0.03194	-1.66932e-10	-1.48313e-10	-7.29315e-11
		0.03196	-1.6691e-10	-9.75496e-11	-1.24974e-10																0.03196	-1.6691e-10	-1.4831e-10	-7.29335e-11
		0.03198	-1.66889e-10	-9.75601e-11	-1.24957e-10																0.03198	-1.66889e-10	-1.48307e-10	-7.29355e-11
		0.032	-1.6687e-10	-9.75697e-11	-1.24938e-10																0.032	-1.6687e-10	-1.48305e-10	-7.29377e-11
		0.03202	-1.66852e-10	-9.75784e-11	-1.2492e-10																0.03202	-1.66852e-10	-1.48303e-10	-7.29401e-11
		0.03204	-1.66835e-10	-9.75861e-11	-1.24902e-10																0.03204	-1.66835e-10	-1.48301e-10	-7.29425e-11
		0.03206	-1.6682e-10	-9.7593e-11	-1.24885e-10																0.03206	-1.6682e-10	-1.48301e-10	-7.29451e-11
		0.03208	-1.66807e-10	-9.75989e-11	-1.24867e-10																0.03208	-1.66807e-10	-1.48301e-10	-7.29476e-11
		0.0321	-1.66794e-10	-9.76037e-11	-1.2485e-10																0.0321	-1.66794e-10	-1.48301e-10	-7.29501e-11
		0.03212	-1.66782e-10	-9.76074e-11	-1.24834e-10																0.03212	-1.66782e-10	-1.48303e-10	-7.29524e-11
		0.03214	-1.66772e-10	-9.76099e-11	-1.24818e-10																0.03214	-1.66772e-10	-1.48305e-10	-7.29543e-11
		0.03216	-1.66762e-10	-9.76111e-11	-1.24803e-10																0.03216	-1.66762e-10	-1.48308e-10	-7.29557e-11
		0.03218	-1.66753e-10	-9.76108e-11	-1.2479e-10																0.03218	-1.66753e-10	-1.48312e-10	-7.29564e-11
		0.0322	-1.66746e-10	-9.76092e-11	-1.24777e-10																0.0322	-1.66746e-10	-1.48316e-10	-7.29562e-11
		0.03222	-1.66739e-10	-9.76062e-11	-1.24766e-10																0.03222	-1.66739e-10	-1.48322e-10	-7.2955e-11
		0.03224	-1.66734e-10	-9.76019e-11	-1.24756e-10																0.03224	-1.66734e-10	-1.48328e-10	-7.29527e-11
		0.03226	-1.6673e-10	-9.75965e-11	-1.24748e-10																0.03226	-1.6673e-10	-1.48335e-10	-7.29492e-11
		0.03228	-1.66727e-10	-9.75902e-11	-1.24741e-10																0.03228	-1.66727e-10	-1.48343e-10	-7.29445e-11
		0.0323	-1.66726e-10	-9.75831e-11	-1.24735e-10																0.0323	-1.66726e-10	-1.48351e-10	-7.29387e-11
		0.03232	-1.66726e-10	-9.75754e-11	-1.2473e-10																0.03232	-1.66726e-10	-1.4836e-10	-7.29319e-11
		0.03234	-1.66727e-10	-9.75672e-11	-1.24727e-10																0.03234	-1.66727e-10	-1.48369e-10	-7.29241e-11
		0.03236	-1.66729e-10	-9.75584e-11	-1.24726e-10																0.03236	-1.66729e-10	-1.48379e-10	-7.29156e-11
		0.03238	-1.66732e-10	-9.7549e-11	-1.24725e-10																0.03238	-1.66732e-10	-1.48389e-10	-7.29062e-11
		0.0324	-1.66736e-10	-9.7539e-11	-1.24726e-10																0.0324	-1.66736e-10	-1.48399e-10	-7.28961e-11
		0.03242	-1.6674e-10	-9.75282e-11	-1.24729e-10																0.03242	-1.6674e-10	-1.4841e-10	-7.28853e-11
		0.03244	-1.66745e-10	-9.75165e-11	-1.24733e-10																0.03244	-1.66745e-10	-1.48421e-10	-7.28738e-11
		0.03246	-1.6675e-10	-9.75038e-11	-1.24739e-10																0.03246	-1.6675e-10	-1.48433e-10	-7.28618e-11
		0.03248	-1.66755e-10	-9.74901e-11	-1.24746e-10																0.03248	-1.66755e-10	-1.48444e-10	-7.28494e-11
		0.0325	-1.66761e-10	-9.74753e-11	-1.24755e-10																0.0325	-1.66761e-10	-1.48456e-10	-7.28365e-11
		0.03252	-1.66766e-10	-9.74594e-11	-1.24766e-10																0.03252	-1.66766e-10	-1.48468e-10	-7.28232e-11
		0.03254	-1.66771e-10	-9.74425e-11	-1.24778e-10																0.03254	-1.66771e-10	-1.48479e-10	-7.28098e-11
		0.03256	-1.66777e-10	-9.74247e-11	-1.24791e-10																0.03256	-1.66777e-10	-1.48491e-10	-7.27962e-11
		0.03258	-1.66782e-10	-9.74061e-11	-1.24806e-10																0.03258	-1.66782e-10	-1.48501e-10	-7.27824e-11
		0.0326	-1.66788e-10	-9.73868e-11	-1.24821e-10																0.0326	-1.66788e-10	-1.48511e-10	-7.27685e-11
		0.03262	-1.66794e-10	-9.73672e-11	-1.24837e-10																0.03262	-1.66794e-10	-1.48521e-10	-7.27545e-11
		0.03264	-1.66801e-10	-9.73473e-11	-1.24854e-10																0.03264	-1.66801e-10	-1.48529e-10	-7.27403e-11
		0.03266	-1.66808e-10	-9.73272e-11	-1.24871e-10																0.03266	-1.66808e-10	-1.48537e-10	-7.27261e-11
		0.03268	-1.66816e-10	-9.73073e-11	-1.24889e-10																0.03268	-1.66816e-10	-1.48544e-10	-7.27115e-11
		0.0327	-1.66825e-10	-9.72875e-11	-1.24906e-10																0.0327	-1.66825e-10	-1.48551e-10	-7.26967e-11
		0.03272	-1.66834e-10	-9.72682e-11	-1.24924e-10																0.03272	-1.66834e-10	-1.48557e-10	-7.26815e-11
		0.03274	-1.66845e-10	-9.72495e-11	-1.24942e-10																0.03274	-1.66845e-10	-1.48563e-10	-7.26658e-11
		0.03276	-1.66856e-10	-9.72315e-11	-1.24961e-10																0.03276	-1.66856e-10	-1.48569e-10	-7.26495e-11
		0.03278	-1.66867e-10	-9.72144e-11	-1.24979e-10																0.03278	-1.66867e-10	-1.48574e-10	-7.26328e-11
		0.0328	-1.66879e-10	-9.71985e-11	-1.24999e-10																0.0328	-1.66879e-10	-1.4858e-10	-7.26156e-11
		0.03282	-1.66891e-10	-9.71837e-11	-1.25018e-10																0.03282	-1.66891e-10	-1.48585e-10	-7.25981e-11
		0.03284	-1.66903e-10	-9.71701e-11	-1.25038e-10																0.03284	-1.66903e-10	-1.4859e-10	-7.25802e-11
		0.03286	-1.66917e-10	-9.71576e-11	-1.25058e-10																0.03286	-1.66917e-10	-1.48595e-10	-7.25621e-11
		0.03288	-1.6693e-10	-9.71464e-11	-1.25079e-10																0.03288	-1.6693e-10	-1.48601e-10	-7.25436e-11
		0.0329	-1.66945e-10	-9.71365e-11	-1.251e-10																0.0329	-1.66945e-10	-1.48606e-10	-7.25249e-11
		0.03292	-1.6696e-10	-9.7128e-11	-1.25121e-10																0.03292	-1.6696e-10	-1.48613e-10	-7.25059e-11
		0.03294	-1.66976e-10	-9.71209e-11	-1.25142e-10																0.03294	-1.66976e-10	-1.4862e-10	-7.24866e-11
		0.03296	-1.66993e-10	-9.71155e-11	-1.25163e-10																0.03296	-1.66993e-10	-1.48627e-10	-7.2467e-11
		0.03298	-1.67011e-10	-9.71115e-11	-1.25185e-10																0.03298	-1.67011e-10	-1.48634e-10	-7.2447e-11
		0.033	-1.6703e-10	-9.7109e-11	-1.25206e-10																0.033	-1.6703e-10	-1.48642e-10	-7.24268e-11
		0.03302	-1.67051e-10	-9.71081e-11	-1.25228e-10																0.03302	-1.67051e-10	-1.48649e-10	-7.24062e-11
		0.03304	-1.67072e-10	-9.71086e-11	-1.2525e-10																0.03304	-1.67072e-10	-1.48657e-10	-7.23855e-11
		0.03306	-1.67094e-10	-9.71108e-11	-1.25272e-10																0.03306	-1.67094e-10	-1.48664e-10	-7.23645e-11
		0.03308	-1.67118e-10	-9.71145e-11	-1.25294e-10																0.03308	-1.67118e-10	-1.4867e-10	-7.23436e-11
		0.0331	-1.67143e-10	-9.71199e-11	-1.25315e-10																0.0331	-1.67143e-10	-1.48676e-10	-7.23227e-11
		0.03312	-1.67169e-10	-9.71269e-11	-1.25337e-10																0.03312	-1.67169e-10	-1.48682e-10	-7.2302e-11
		0.03314	-1.67197e-10	-9.71355e-11	-1.25357e-10																0.03314	-1.67197e-10	-1.48688e-10	-7.22815e-11
		0.03316	-1.67226e-10	-9.71456e-11	-1.25378e-10																0.03316	-1.67226e-10	-1.48693e-10	-7.22613e-11
		0.03318	-1.67257e-10	-9.7157e-11	-1.25397e-10																0.03318	-1.67257e-10	-1.48698e-10	-7.22414e-11
		0.0332	-1.6729e-10	-9.71696e-11	-1.25415e-10																0.0332	-1.6729e-10	-1.48702e-10	-7.22218e-11
		0.03322	-1.67325e-10	-9.7183e-11	-1.25433e-10																0.03322	-1.67325e-10	-1.48706e-10	-7.22025e-11
		0.03324	-1.67361e-10	-9.71973e-11	-1.25449e-10																0.03324	-1.67361e-10	-1.48709e-10	-7.21835e-11
		0.03326	-1.67399e-10	-9.7212e-11	-1.25464e-10																0.03326	-1.67399e-10	-1.48712e-10	-7.21647e-11
		0.03328	-1.67439e-10	-9.72272e-11	-1.25478e-10																0.03328	-1.67439e-10	-1.48715e-10	-7.21461e-11
		0.0333	-1.67481e-10	-9.72429e-11	-1.25491e-10																0.0333	-1.67481e-10	-1.48717e-10	-7.21277e-11
		0.03332	-1.67524e-10	-9.7259e-11	-1.25502e-10																0.03332	-1.67524e-10	-1.48718e-10	-7.21093e-11
		0.03334	-1.67569e-10	-9.72755e-11	-1.25512e-10																0.03334	-1.67569e-10	-1.48718e-10	-7.20909e-11
		0.03336	-1.67616e-10	-9.72926e-11	-1.25521e-10																0.03336	-1.67616e-10	-1.48719e-10	-7.20724e-11
		0.03338	-1.67664e-10	-9.731e-11	-1.25529e-10																0.03338	-1.67664e-10	-1.48718e-10	-7.20539e-11
		0.0334	-1.67713e-10	-9.73278e-11	-1.25535e-10																0.0334	-1.67713e-10	-1.48717e-10	-7.20354e-11
		0.03342	-1.67764e-10	-9.73456e-11	-1.2554e-10																0.03342	-1.67764e-10	-1.48716e-10	-7.20167e-11
		0.03344	-1.67816e-10	-9.73633e-11	-1.25544e-10																0.03344	-1.67816e-10	-1.48714e-10	-7.19979e-11
		0.03346	-1.67869e-10	-9.73806e-11	-1.25547e-10																0.03346	-1.67869e-10	-1.48712e-10	-7.19789e-11
		0.03348	-1.67923e-10	-9.73976e-11	-1.25548e-10																0.03348	-1.67923e-10	-1.48709e-10	-7.19596e-11
		0.0335	-1.67977e-10	-9.74138e-11	-1.25548e-10																0.0335	-1.67977e-10	-1.48705e-10	-7.19402e-11
		0.03352	-1.68032e-10	-9.74291e-11	-1.25547e-10																0.03352	-1.68032e-10	-1.48701e-10	-7.19204e-11
		0.03354	-1.68088e-10	-9.74435e-11	-1.25544e-10																0.03354	-1.68088e-10	-1.48696e-10	-7.19005e-11
		0.03356	-1.68143e-10	-9.74569e-11	-1.2554e-10																0.03356	-1.68143e-10	-1.48691e-10	-7.18803e-11
		0.03358	-1.68199e-10	-9.74692e-11	-1.25535e-10																0.03358	-1.68199e-10	-1.48685e-10	-7.18601e-11
		0.0336	-1.68255e-10	-9.74804e-11	-1.25528e-10																0.0336	-1.68255e-10	-1.48679e-10	-7.18398e-11
		0.03362	-1.68311e-10	-9.74903e-11	-1.25521e-10																0.03362	-1.68311e-10	-1.48672e-10	-7.18196e-11
		0.03364	-1.68367e-10	-9.74989e-11	-1.25513e-10																0.03364	-1.68367e-10	-1.48665e-10	-7.17994e-11
		0.03366	-1.68423e-10	-9.75062e-11	-1.25504e-10																0.03366	-1.68423e-10	-1.48658e-10	-7.17796e-11
		0.03368	-1.6848e-10	-9.75121e-11	-1.25494e-10																0.03368	-1.6848e-10	-1.4865e-10	-7.17602e-11
		0.0337	-1.68537e-10	-9.75168e-11	-1.25483e-10																0.0337	-1.68537e-10	-1.48641e-10	-7.17414e-11
		0.03372	-1.68594e-10	-9.75202e-11	-1.25472e-10																0.03372	-1.68594e-10	-1.48631e-10	-7.17234e-11
		0.03374	-1.68651e-10	-9.75226e-11	-1.25461e-10																0.03374	-1.68651e-10	-1.48621e-10	-7.17061e-11
		0.03376	-1.68708e-10	-9.75241e-11	-1.25449e-10																0.03376	-1.68708e-10	-1.4861e-10	-7.16899e-11
		0.03378	-1.68766e-10	-9.75248e-11	-1.25437e-10																0.03378	-1.68766e-10	-1.48598e-10	-7.16747e-11
		0.0338	-1.68823e-10	-9.7525e-11	-1.25425e-10																0.0338	-1.68823e-10	-1.48586e-10	-7.16606e-11
		0.03382	-1.6888e-10	-9.75247e-11	-1.25413e-10																0.03382	-1.6888e-10	-1.48574e-10	-7.16475e-11
		0.03384	-1.68937e-10	-9.75242e-11	-1.25401e-10																0.03384	-1.68937e-10	-1.4856e-10	-7.16355e-11
		0.03386	-1.68994e-10	-9.75234e-11	-1.25389e-10																0.03386	-1.68994e-10	-1.48547e-10	-7.16245e-11
		0.03388	-1.6905e-10	-9.75224e-11	-1.25378e-10																0.03388	-1.6905e-10	-1.48532e-10	-7.16142e-11
		0.0339	-1.69106e-10	-9.75214e-11	-1.25367e-10																0.0339	-1.69106e-10	-1.48517e-10	-7.16048e-11
		0.03392	-1.6916e-10	-9.75203e-11	-1.25358e-10																0.03392	-1.6916e-10	-1.48501e-10	-7.1596e-11
		0.03394	-1.69214e-10	-9.75193e-11	-1.25349e-10																0.03394	-1.69214e-10	-1.48484e-10	-7.15879e-11
		0.03396	-1.69267e-10	-9.75185e-11	-1.25342e-10																0.03396	-1.69267e-10	-1.48467e-10	-7.15802e-11
		0.03398	-1.69319e-10	-9.75179e-11	-1.25337e-10																0.03398	-1.69319e-10	-1.48449e-10	-7.15731e-11
		0.034	-1.69369e-10	-9.75177e-11	-1.25332e-10																0.034	-1.69369e-10	-1.4843e-10	-7.15665e-11
		0.03402	-1.69418e-10	-9.7518e-11	-1.2533e-10																0.03402	-1.69418e-10	-1.48411e-10	-7.15606e-11
		0.03404	-1.69465e-10	-9.7519e-11	-1.25329e-10																0.03404	-1.69465e-10	-1.48391e-10	-7.15552e-11
		0.03406	-1.69511e-10	-9.75209e-11	-1.2533e-10																0.03406	-1.69511e-10	-1.48372e-10	-7.15507e-11
		0.03408	-1.69555e-10	-9.75238e-11	-1.25333e-10																0.03408	-1.69555e-10	-1.48352e-10	-7.15469e-11
		0.0341	-1.69598e-10	-9.75279e-11	-1.25337e-10																0.0341	-1.69598e-10	-1.48333e-10	-7.1544e-11
		0.03412	-1.69638e-10	-9.75334e-11	-1.25342e-10																0.03412	-1.69638e-10	-1.48314e-10	-7.1542e-11
		0.03414	-1.69677e-10	-9.75403e-11	-1.25349e-10																0.03414	-1.69677e-10	-1.48295e-10	-7.15409e-11
		0.03416	-1.69714e-10	-9.75489e-11	-1.25357e-10																0.03416	-1.69714e-10	-1.48277e-10	-7.15408e-11
		0.03418	-1.6975e-10	-9.75591e-11	-1.25366e-10																0.03418	-1.6975e-10	-1.48259e-10	-7.15418e-11
		0.0342	-1.69783e-10	-9.75709e-11	-1.25377e-10																0.0342	-1.69783e-10	-1.48242e-10	-7.1544e-11
		0.03422	-1.69814e-10	-9.75842e-11	-1.25388e-10																0.03422	-1.69814e-10	-1.48224e-10	-7.15475e-11
		0.03424	-1.69843e-10	-9.75989e-11	-1.25401e-10																0.03424	-1.69843e-10	-1.48207e-10	-7.15524e-11
		0.03426	-1.69869e-10	-9.76149e-11	-1.25415e-10																0.03426	-1.69869e-10	-1.4819e-10	-7.15588e-11
		0.03428	-1.69894e-10	-9.76321e-11	-1.2543e-10																0.03428	-1.69894e-10	-1.48173e-10	-7.15666e-11
		0.0343	-1.69916e-10	-9.76504e-11	-1.25445e-10																0.0343	-1.69916e-10	-1.48156e-10	-7.15758e-11
		0.03432	-1.69936e-10	-9.76699e-11	-1.25461e-10																0.03432	-1.69936e-10	-1.4814e-10	-7.15863e-11
		0.03434	-1.69953e-10	-9.76905e-11	-1.25478e-10																0.03434	-1.69953e-10	-1.48124e-10	-7.1598e-11
		0.03436	-1.69969e-10	-9.77124e-11	-1.25495e-10																0.03436	-1.69969e-10	-1.48109e-10	-7.16108e-11
		0.03438	-1.69983e-10	-9.77358e-11	-1.25513e-10																0.03438	-1.69983e-10	-1.48094e-10	-7.16245e-11
		0.0344	-1.69995e-10	-9.77606e-11	-1.2553e-10																0.0344	-1.69995e-10	-1.4808e-10	-7.1639e-11
		0.03442	-1.70006e-10	-9.7787e-11	-1.25546e-10																0.03442	-1.70006e-10	-1.48067e-10	-7.16541e-11
		0.03444	-1.70016e-10	-9.78151e-11	-1.25562e-10																0.03444	-1.70016e-10	-1.48054e-10	-7.16696e-11
		0.03446	-1.70025e-10	-9.78449e-11	-1.25577e-10																0.03446	-1.70025e-10	-1.48042e-10	-7.16853e-11
		0.03448	-1.70034e-10	-9.78764e-11	-1.25591e-10																0.03448	-1.70034e-10	-1.4803e-10	-7.17009e-11
		0.0345	-1.70041e-10	-9.79097e-11	-1.25604e-10																0.0345	-1.70041e-10	-1.4802e-10	-7.17163e-11
		0.03452	-1.70048e-10	-9.79446e-11	-1.25616e-10																0.03452	-1.70048e-10	-1.48011e-10	-7.17315e-11
		0.03454	-1.70055e-10	-9.79812e-11	-1.25626e-10																0.03454	-1.70055e-10	-1.48003e-10	-7.17461e-11
		0.03456	-1.70062e-10	-9.80192e-11	-1.25636e-10																0.03456	-1.70062e-10	-1.47996e-10	-7.17602e-11
		0.03458	-1.70068e-10	-9.80586e-11	-1.25644e-10																0.03458	-1.70068e-10	-1.4799e-10	-7.17735e-11
		0.0346	-1.70074e-10	-9.80992e-11	-1.25651e-10																0.0346	-1.70074e-10	-1.47986e-10	-7.17859e-11
		0.03462	-1.7008e-10	-9.81409e-11	-1.25657e-10																0.03462	-1.7008e-10	-1.47983e-10	-7.17973e-11
		0.03464	-1.70085e-10	-9.81835e-11	-1.25661e-10																0.03464	-1.70085e-10	-1.47982e-10	-7.18076e-11
		0.03466	-1.7009e-10	-9.82269e-11	-1.25665e-10																0.03466	-1.7009e-10	-1.47983e-10	-7.18167e-11
		0.03468	-1.70096e-10	-9.8271e-11	-1.25667e-10																0.03468	-1.70096e-10	-1.47985e-10	-7.18247e-11
		0.0347	-1.70101e-10	-9.83154e-11	-1.25668e-10																0.0347	-1.70101e-10	-1.47989e-10	-7.18314e-11
		0.03472	-1.70106e-10	-9.83602e-11	-1.25668e-10																0.03472	-1.70106e-10	-1.47994e-10	-7.18369e-11
		0.03474	-1.70112e-10	-9.8405e-11	-1.25667e-10																0.03474	-1.70112e-10	-1.48001e-10	-7.18411e-11
		0.03476	-1.70118e-10	-9.84494e-11	-1.25664e-10																0.03476	-1.70118e-10	-1.48009e-10	-7.1844e-11
		0.03478	-1.70125e-10	-9.84934e-11	-1.2566e-10																0.03478	-1.70125e-10	-1.48019e-10	-7.18456e-11
		0.0348	-1.70132e-10	-9.85366e-11	-1.25654e-10																0.0348	-1.70132e-10	-1.48029e-10	-7.18459e-11
		0.03482	-1.7014e-10	-9.85786e-11	-1.25647e-10																0.03482	-1.7014e-10	-1.48041e-10	-7.18449e-11
		0.03484	-1.70149e-10	-9.86194e-11	-1.25638e-10																0.03484	-1.70149e-10	-1.48054e-10	-7.18426e-11
		0.03486	-1.70159e-10	-9.86587e-11	-1.25627e-10																0.03486	-1.70159e-10	-1.48067e-10	-7.18391e-11
		0.03488	-1.7017e-10	-9.86962e-11	-1.25615e-10																0.03488	-1.7017e-10	-1.48081e-10	-7.18344e-11
		0.0349	-1.70181e-10	-9.87317e-11	-1.256e-10																0.0349	-1.70181e-10	-1.48095e-10	-7.18285e-11
		0.03492	-1.70194e-10	-9.87649e-11	-1.25585e-10																0.03492	-1.70194e-10	-1.48109e-10	-7.18214e-11
		0.03494	-1.70207e-10	-9.87957e-11	-1.25567e-10																0.03494	-1.70207e-10	-1.48124e-10	-7.1813e-11
		0.03496	-1.70221e-10	-9.88239e-11	-1.25547e-10																0.03496	-1.70221e-10	-1.48139e-10	-7.18034e-11
		0.03498	-1.70235e-10	-9.88493e-11	-1.25526e-10																0.03498	-1.70235e-10	-1.48154e-10	-7.17924e-11
		0.035	-1.70251e-10	-9.88718e-11	-1.25503e-10																0.035	-1.70251e-10	-1.4817e-10	-7.17802e-11
		0.03502	-1.70267e-10	-9.88912e-11	-1.25478e-10																0.03502	-1.70267e-10	-1.48185e-10	-7.17667e-11
		0.03504	-1.70285e-10	-9.89076e-11	-1.25451e-10																0.03504	-1.70285e-10	-1.48201e-10	-7.17519e-11
		0.03506	-1.70304e-10	-9.89206e-11	-1.25422e-10																0.03506	-1.70304e-10	-1.48218e-10	-7.17359e-11
		0.03508	-1.70324e-10	-9.89303e-11	-1.25392e-10																0.03508	-1.70324e-10	-1.48235e-10	-7.17185e-11
		0.0351	-1.70345e-10	-9.89366e-11	-1.2536e-10																0.0351	-1.70345e-10	-1.48252e-10	-7.17e-11
		0.03512	-1.70368e-10	-9.89392e-11	-1.25328e-10																0.03512	-1.70368e-10	-1.4827e-10	-7.16803e-11
		0.03514	-1.70391e-10	-9.89382e-11	-1.25295e-10																0.03514	-1.70391e-10	-1.48287e-10	-7.16595e-11
		0.03516	-1.70416e-10	-9.89336e-11	-1.2526e-10																0.03516	-1.70416e-10	-1.48305e-10	-7.16376e-11
		0.03518	-1.70441e-10	-9.89255e-11	-1.25226e-10																0.03518	-1.70441e-10	-1.48323e-10	-7.16148e-11
		0.0352	-1.70468e-10	-9.89139e-11	-1.25191e-10																0.0352	-1.70468e-10	-1.48341e-10	-7.15911e-11
		0.03522	-1.70495e-10	-9.88991e-11	-1.25156e-10																0.03522	-1.70495e-10	-1.48358e-10	-7.15665e-11
		0.03524	-1.70524e-10	-9.88813e-11	-1.25122e-10																0.03524	-1.70524e-10	-1.48375e-10	-7.15413e-11
		0.03526	-1.70553e-10	-9.88607e-11	-1.25088e-10																0.03526	-1.70553e-10	-1.48391e-10	-7.15156e-11
		0.03528	-1.70583e-10	-9.88374e-11	-1.25054e-10																0.03528	-1.70583e-10	-1.48406e-10	-7.14895e-11
		0.0353	-1.70615e-10	-9.88116e-11	-1.25021e-10																0.0353	-1.70615e-10	-1.48421e-10	-7.14634e-11
		0.03532	-1.70647e-10	-9.87836e-11	-1.24989e-10																0.03532	-1.70647e-10	-1.48435e-10	-7.14374e-11
		0.03534	-1.7068e-10	-9.87532e-11	-1.24958e-10																0.03534	-1.7068e-10	-1.48449e-10	-7.14118e-11
		0.03536	-1.70715e-10	-9.87207e-11	-1.24928e-10																0.03536	-1.70715e-10	-1.48461e-10	-7.13867e-11
		0.03538	-1.7075e-10	-9.86862e-11	-1.24899e-10																0.03538	-1.7075e-10	-1.48472e-10	-7.13621e-11
		0.0354	-1.70787e-10	-9.86499e-11	-1.24872e-10																0.0354	-1.70787e-10	-1.48482e-10	-7.13382e-11
		0.03542	-1.70825e-10	-9.86118e-11	-1.24847e-10																0.03542	-1.70825e-10	-1.48491e-10	-7.13151e-11
		0.03544	-1.70865e-10	-9.8572e-11	-1.24824e-10																0.03544	-1.70865e-10	-1.48498e-10	-7.12928e-11
		0.03546	-1.70906e-10	-9.85308e-11	-1.24802e-10																0.03546	-1.70906e-10	-1.48504e-10	-7.12713e-11
		0.03548	-1.70948e-10	-9.84884e-11	-1.24783e-10																0.03548	-1.70948e-10	-1.48509e-10	-7.12506e-11
		0.0355	-1.70992e-10	-9.84449e-11	-1.24766e-10																0.0355	-1.70992e-10	-1.48512e-10	-7.12307e-11
		0.03552	-1.71037e-10	-9.84005e-11	-1.24751e-10																0.03552	-1.71037e-10	-1.48514e-10	-7.12116e-11
		0.03554	-1.71083e-10	-9.83554e-11	-1.24739e-10																0.03554	-1.71083e-10	-1.48515e-10	-7.1193e-11
		0.03556	-1.7113e-10	-9.831e-11	-1.24729e-10																0.03556	-1.7113e-10	-1.48515e-10	-7.11752e-11
		0.03558	-1.71177e-10	-9.82643e-11	-1.24721e-10																0.03558	-1.71177e-10	-1.48513e-10	-7.11579e-11
		0.0356	-1.71226e-10	-9.82187e-11	-1.24715e-10																0.0356	-1.71226e-10	-1.4851e-10	-7.11413e-11
		0.03562	-1.71274e-10	-9.81734e-11	-1.24712e-10																0.03562	-1.71274e-10	-1.48506e-10	-7.11252e-11
		0.03564	-1.71322e-10	-9.81285e-11	-1.2471e-10																0.03564	-1.71322e-10	-1.48502e-10	-7.11096e-11
		0.03566	-1.7137e-10	-9.80842e-11	-1.24709e-10																0.03566	-1.7137e-10	-1.48496e-10	-7.10942e-11
		0.03568	-1.71417e-10	-9.80406e-11	-1.24711e-10																0.03568	-1.71417e-10	-1.4849e-10	-7.1079e-11
		0.0357	-1.71464e-10	-9.79978e-11	-1.24714e-10																0.0357	-1.71464e-10	-1.48484e-10	-7.10639e-11
		0.03572	-1.71511e-10	-9.79557e-11	-1.24718e-10																0.03572	-1.71511e-10	-1.48476e-10	-7.10488e-11
		0.03574	-1.71557e-10	-9.79142e-11	-1.24724e-10																0.03574	-1.71557e-10	-1.48469e-10	-7.10337e-11
		0.03576	-1.71602e-10	-9.78734e-11	-1.24731e-10																0.03576	-1.71602e-10	-1.48461e-10	-7.10184e-11
		0.03578	-1.71647e-10	-9.7833e-11	-1.2474e-10																0.03578	-1.71647e-10	-1.48453e-10	-7.10028e-11
		0.0358	-1.71691e-10	-9.77931e-11	-1.24749e-10																0.0358	-1.71691e-10	-1.48445e-10	-7.0987e-11
		0.03582	-1.71735e-10	-9.77536e-11	-1.24759e-10																0.03582	-1.71735e-10	-1.48436e-10	-7.09708e-11
		0.03584	-1.71778e-10	-9.77145e-11	-1.2477e-10																0.03584	-1.71778e-10	-1.48427e-10	-7.09543e-11
		0.03586	-1.71822e-10	-9.76759e-11	-1.24781e-10																0.03586	-1.71822e-10	-1.48418e-10	-7.09373e-11
		0.03588	-1.71865e-10	-9.7638e-11	-1.24792e-10																0.03588	-1.71865e-10	-1.48409e-10	-7.09198e-11
		0.0359	-1.71908e-10	-9.76007e-11	-1.24803e-10																0.0359	-1.71908e-10	-1.48399e-10	-7.0902e-11
		0.03592	-1.71951e-10	-9.75643e-11	-1.24814e-10																0.03592	-1.71951e-10	-1.48389e-10	-7.08839e-11
		0.03594	-1.71993e-10	-9.75287e-11	-1.24824e-10																0.03594	-1.71993e-10	-1.48379e-10	-7.08655e-11
		0.03596	-1.72036e-10	-9.74941e-11	-1.24834e-10																0.03596	-1.72036e-10	-1.48368e-10	-7.08468e-11
		0.03598	-1.72078e-10	-9.74604e-11	-1.24842e-10																0.03598	-1.72078e-10	-1.48356e-10	-7.0828e-11
		0.036	-1.72119e-10	-9.74279e-11	-1.2485e-10																0.036	-1.72119e-10	-1.48345e-10	-7.0809e-11
		0.03602	-1.72161e-10	-9.73963e-11	-1.24856e-10																0.03602	-1.72161e-10	-1.48332e-10	-7.079e-11
		0.03604	-1.72202e-10	-9.73658e-11	-1.24862e-10																0.03604	-1.72202e-10	-1.4832e-10	-7.0771e-11
		0.03606	-1.72242e-10	-9.73364e-11	-1.24867e-10																0.03606	-1.72242e-10	-1.48306e-10	-7.0752e-11
		0.03608	-1.72282e-10	-9.73082e-11	-1.24872e-10																0.03608	-1.72282e-10	-1.48292e-10	-7.07331e-11
		0.0361	-1.72322e-10	-9.72811e-11	-1.24876e-10																0.0361	-1.72322e-10	-1.48277e-10	-7.07141e-11
		0.03612	-1.72361e-10	-9.72553e-11	-1.2488e-10																0.03612	-1.72361e-10	-1.48262e-10	-7.06951e-11
		0.03614	-1.72399e-10	-9.72307e-11	-1.24884e-10																0.03614	-1.72399e-10	-1.48246e-10	-7.06762e-11
		0.03616	-1.72437e-10	-9.72075e-11	-1.24887e-10																0.03616	-1.72437e-10	-1.4823e-10	-7.06572e-11
		0.03618	-1.72475e-10	-9.71858e-11	-1.24889e-10																0.03618	-1.72475e-10	-1.48214e-10	-7.06381e-11
		0.0362	-1.72511e-10	-9.71657e-11	-1.24891e-10																0.0362	-1.72511e-10	-1.48199e-10	-7.06188e-11
		0.03622	-1.72547e-10	-9.71474e-11	-1.24892e-10																0.03622	-1.72547e-10	-1.48183e-10	-7.05991e-11
		0.03624	-1.72582e-10	-9.71309e-11	-1.24892e-10																0.03624	-1.72582e-10	-1.48168e-10	-7.0579e-11
		0.03626	-1.72616e-10	-9.71164e-11	-1.24891e-10																0.03626	-1.72616e-10	-1.48153e-10	-7.05586e-11
		0.03628	-1.7265e-10	-9.71038e-11	-1.24889e-10																0.03628	-1.7265e-10	-1.48138e-10	-7.05378e-11
		0.0363	-1.72682e-10	-9.70933e-11	-1.24887e-10																0.0363	-1.72682e-10	-1.48124e-10	-7.05167e-11
		0.03632	-1.72714e-10	-9.70846e-11	-1.24883e-10																0.03632	-1.72714e-10	-1.48111e-10	-7.04952e-11
		0.03634	-1.72745e-10	-9.70778e-11	-1.24878e-10																0.03634	-1.72745e-10	-1.48098e-10	-7.04734e-11
		0.03636	-1.72774e-10	-9.70727e-11	-1.24873e-10																0.03636	-1.72774e-10	-1.48087e-10	-7.04513e-11
		0.03638	-1.72803e-10	-9.70692e-11	-1.24866e-10																0.03638	-1.72803e-10	-1.48076e-10	-7.0429e-11
		0.0364	-1.7283e-10	-9.70671e-11	-1.24858e-10																0.0364	-1.7283e-10	-1.48066e-10	-7.04064e-11
		0.03642	-1.72855e-10	-9.70663e-11	-1.24849e-10																0.03642	-1.72855e-10	-1.48057e-10	-7.03836e-11
		0.03644	-1.72879e-10	-9.70667e-11	-1.24839e-10																0.03644	-1.72879e-10	-1.48048e-10	-7.03606e-11
		0.03646	-1.72901e-10	-9.70681e-11	-1.24828e-10																0.03646	-1.72901e-10	-1.48041e-10	-7.03376e-11
		0.03648	-1.72922e-10	-9.70704e-11	-1.24817e-10																0.03648	-1.72922e-10	-1.48034e-10	-7.03147e-11
		0.0365	-1.7294e-10	-9.70735e-11	-1.24805e-10																0.0365	-1.7294e-10	-1.48028e-10	-7.02919e-11
		0.03652	-1.72956e-10	-9.70773e-11	-1.24792e-10																0.03652	-1.72956e-10	-1.48022e-10	-7.02696e-11
		0.03654	-1.7297e-10	-9.70816e-11	-1.24779e-10																0.03654	-1.7297e-10	-1.48018e-10	-7.02477e-11
		0.03656	-1.72981e-10	-9.70863e-11	-1.24766e-10																0.03656	-1.72981e-10	-1.48014e-10	-7.02265e-11
		0.03658	-1.72991e-10	-9.70911e-11	-1.24752e-10																0.03658	-1.72991e-10	-1.48011e-10	-7.02058e-11
		0.0366	-1.72998e-10	-9.70959e-11	-1.24737e-10																0.0366	-1.72998e-10	-1.4801e-10	-7.0186e-11
		0.03662	-1.73003e-10	-9.71004e-11	-1.24723e-10																0.03662	-1.73003e-10	-1.48009e-10	-7.01668e-11
		0.03664	-1.73007e-10	-9.71046e-11	-1.24708e-10																0.03664	-1.73007e-10	-1.48009e-10	-7.01484e-11
		0.03666	-1.73008e-10	-9.71082e-11	-1.24693e-10																0.03666	-1.73008e-10	-1.48009e-10	-7.01308e-11
		0.03668	-1.73007e-10	-9.71111e-11	-1.24679e-10																0.03668	-1.73007e-10	-1.4801e-10	-7.01138e-11
		0.0367	-1.73005e-10	-9.71134e-11	-1.24665e-10																0.0367	-1.73005e-10	-1.48012e-10	-7.00977e-11
		0.03672	-1.73e-10	-9.7115e-11	-1.24651e-10																0.03672	-1.73e-10	-1.48014e-10	-7.00825e-11
		0.03674	-1.72994e-10	-9.7116e-11	-1.24638e-10																0.03674	-1.72994e-10	-1.48017e-10	-7.00683e-11
		0.03676	-1.72986e-10	-9.71163e-11	-1.24626e-10																0.03676	-1.72986e-10	-1.4802e-10	-7.00553e-11
		0.03678	-1.72976e-10	-9.71158e-11	-1.24615e-10																0.03678	-1.72976e-10	-1.48024e-10	-7.00433e-11
		0.0368	-1.72965e-10	-9.71148e-11	-1.24605e-10																0.0368	-1.72965e-10	-1.48029e-10	-7.00325e-11
		0.03682	-1.72952e-10	-9.71132e-11	-1.24595e-10																0.03682	-1.72952e-10	-1.48034e-10	-7.00227e-11
		0.03684	-1.72937e-10	-9.71109e-11	-1.24587e-10																0.03684	-1.72937e-10	-1.48039e-10	-7.0014e-11
		0.03686	-1.72921e-10	-9.7108e-11	-1.24579e-10																0.03686	-1.72921e-10	-1.48045e-10	-7.00063e-11
		0.03688	-1.72903e-10	-9.71045e-11	-1.24573e-10																0.03688	-1.72903e-10	-1.48052e-10	-6.99996e-11
		0.0369	-1.72883e-10	-9.71005e-11	-1.24569e-10																0.0369	-1.72883e-10	-1.48059e-10	-6.99938e-11
		0.03692	-1.72862e-10	-9.70957e-11	-1.24566e-10																0.03692	-1.72862e-10	-1.48066e-10	-6.99891e-11
		0.03694	-1.72839e-10	-9.70904e-11	-1.24564e-10																0.03694	-1.72839e-10	-1.48073e-10	-6.99854e-11
		0.03696	-1.72815e-10	-9.70846e-11	-1.24564e-10																0.03696	-1.72815e-10	-1.4808e-10	-6.99828e-11
		0.03698	-1.7279e-10	-9.70782e-11	-1.24566e-10																0.03698	-1.7279e-10	-1.48088e-10	-6.99816e-11
		0.037	-1.72763e-10	-9.70715e-11	-1.2457e-10																0.037	-1.72763e-10	-1.48095e-10	-6.99819e-11
		0.03702	-1.72735e-10	-9.70643e-11	-1.24575e-10																0.03702	-1.72735e-10	-1.48102e-10	-6.99836e-11
		0.03704	-1.72705e-10	-9.70569e-11	-1.24581e-10																0.03704	-1.72705e-10	-1.4811e-10	-6.99869e-11
		0.03706	-1.72675e-10	-9.70491e-11	-1.24589e-10																0.03706	-1.72675e-10	-1.48116e-10	-6.99918e-11
		0.03708	-1.72645e-10	-9.7041e-11	-1.24598e-10																0.03708	-1.72645e-10	-1.48123e-10	-6.9998e-11
		0.0371	-1.72614e-10	-9.70328e-11	-1.24608e-10																0.0371	-1.72614e-10	-1.48128e-10	-7.00056e-11
		0.03712	-1.72583e-10	-9.70246e-11	-1.2462e-10																0.03712	-1.72583e-10	-1.48134e-10	-7.00145e-11
		0.03714	-1.72552e-10	-9.70164e-11	-1.24633e-10																0.03714	-1.72552e-10	-1.48139e-10	-7.00246e-11
		0.03716	-1.72521e-10	-9.70083e-11	-1.24646e-10																0.03716	-1.72521e-10	-1.48144e-10	-7.0036e-11
		0.03718	-1.72491e-10	-9.70004e-11	-1.24661e-10																0.03718	-1.72491e-10	-1.4815e-10	-7.00486e-11
		0.0372	-1.72462e-10	-9.69928e-11	-1.24677e-10																0.0372	-1.72462e-10	-1.48155e-10	-7.00626e-11
		0.03722	-1.72433e-10	-9.69854e-11	-1.24693e-10																0.03722	-1.72433e-10	-1.48162e-10	-7.00776e-11
		0.03724	-1.72405e-10	-9.69784e-11	-1.24711e-10																0.03724	-1.72405e-10	-1.48168e-10	-7.00938e-11
		0.03726	-1.72379e-10	-9.69718e-11	-1.24729e-10																0.03726	-1.72379e-10	-1.48175e-10	-7.01107e-11
		0.03728	-1.72353e-10	-9.69654e-11	-1.24747e-10																0.03728	-1.72353e-10	-1.48183e-10	-7.01283e-11
		0.0373	-1.72329e-10	-9.69595e-11	-1.24766e-10																0.0373	-1.72329e-10	-1.48192e-10	-7.01461e-11
		0.03732	-1.72306e-10	-9.6954e-11	-1.24785e-10																0.03732	-1.72306e-10	-1.48201e-10	-7.01641e-11
		0.03734	-1.72284e-10	-9.69492e-11	-1.24805e-10																0.03734	-1.72284e-10	-1.4821e-10	-7.01818e-11
		0.03736	-1.72263e-10	-9.6945e-11	-1.24825e-10																0.03736	-1.72263e-10	-1.48219e-10	-7.01992e-11
		0.03738	-1.72243e-10	-9.69416e-11	-1.24845e-10																0.03738	-1.72243e-10	-1.48229e-10	-7.0216e-11
		0.0374	-1.72225e-10	-9.69389e-11	-1.24865e-10																0.0374	-1.72225e-10	-1.48239e-10	-7.0232e-11
		0.03742	-1.72208e-10	-9.69371e-11	-1.24885e-10																0.03742	-1.72208e-10	-1.48249e-10	-7.02473e-11
		0.03744	-1.72192e-10	-9.69363e-11	-1.24904e-10																0.03744	-1.72192e-10	-1.48258e-10	-7.02617e-11
		0.03746	-1.72176e-10	-9.69365e-11	-1.24923e-10																0.03746	-1.72176e-10	-1.48268e-10	-7.02753e-11
		0.03748	-1.72163e-10	-9.69376e-11	-1.24941e-10																0.03748	-1.72163e-10	-1.48277e-10	-7.0288e-11
		0.0375	-1.7215e-10	-9.69398e-11	-1.24958e-10																0.0375	-1.7215e-10	-1.48286e-10	-7.03e-11
		0.03752	-1.72138e-10	-9.6943e-11	-1.24973e-10																0.03752	-1.72138e-10	-1.48295e-10	-7.03112e-11
		0.03754	-1.72127e-10	-9.69471e-11	-1.24988e-10																0.03754	-1.72127e-10	-1.48304e-10	-7.03217e-11
		0.03756	-1.72117e-10	-9.6952e-11	-1.25001e-10																0.03756	-1.72117e-10	-1.48312e-10	-7.03316e-11
		0.03758	-1.72108e-10	-9.69578e-11	-1.25012e-10																0.03758	-1.72108e-10	-1.48319e-10	-7.03407e-11
		0.0376	-1.721e-10	-9.69642e-11	-1.25023e-10																0.0376	-1.721e-10	-1.48325e-10	-7.03491e-11
		0.03762	-1.72093e-10	-9.69713e-11	-1.25032e-10																0.03762	-1.72093e-10	-1.4833e-10	-7.0357e-11
		0.03764	-1.72087e-10	-9.6979e-11	-1.2504e-10																0.03764	-1.72087e-10	-1.48334e-10	-7.03643e-11
		0.03766	-1.72081e-10	-9.69872e-11	-1.25047e-10																0.03766	-1.72081e-10	-1.48337e-10	-7.03711e-11
		0.03768	-1.72075e-10	-9.6996e-11	-1.25054e-10																0.03768	-1.72075e-10	-1.48339e-10	-7.03776e-11
		0.0377	-1.72069e-10	-9.70053e-11	-1.25059e-10																0.0377	-1.72069e-10	-1.48339e-10	-7.03838e-11
		0.03772	-1.72063e-10	-9.70151e-11	-1.25064e-10																0.03772	-1.72063e-10	-1.48338e-10	-7.03898e-11
		0.03774	-1.72057e-10	-9.70257e-11	-1.25067e-10																0.03774	-1.72057e-10	-1.48336e-10	-7.03956e-11
		0.03776	-1.7205e-10	-9.7037e-11	-1.2507e-10																0.03776	-1.7205e-10	-1.48332e-10	-7.04011e-11
		0.03778	-1.72043e-10	-9.70492e-11	-1.25073e-10																0.03778	-1.72043e-10	-1.48328e-10	-7.04064e-11
		0.0378	-1.72035e-10	-9.70622e-11	-1.25075e-10																0.0378	-1.72035e-10	-1.48322e-10	-7.04114e-11
		0.03782	-1.72027e-10	-9.70763e-11	-1.25076e-10																0.03782	-1.72027e-10	-1.48315e-10	-7.04161e-11
		0.03784	-1.72018e-10	-9.70914e-11	-1.25078e-10																0.03784	-1.72018e-10	-1.48307e-10	-7.04204e-11
		0.03786	-1.72008e-10	-9.71076e-11	-1.25079e-10																0.03786	-1.72008e-10	-1.48298e-10	-7.04243e-11
		0.03788	-1.71997e-10	-9.71247e-11	-1.2508e-10																0.03788	-1.71997e-10	-1.48288e-10	-7.04278e-11
		0.0379	-1.71986e-10	-9.71429e-11	-1.25081e-10																0.0379	-1.71986e-10	-1.48278e-10	-7.04309e-11
		0.03792	-1.71973e-10	-9.7162e-11	-1.25082e-10																0.03792	-1.71973e-10	-1.48268e-10	-7.04333e-11
		0.03794	-1.7196e-10	-9.71818e-11	-1.25083e-10																0.03794	-1.7196e-10	-1.48258e-10	-7.04352e-11
		0.03796	-1.71945e-10	-9.72024e-11	-1.25083e-10																0.03796	-1.71945e-10	-1.48247e-10	-7.04363e-11
		0.03798	-1.7193e-10	-9.72236e-11	-1.25084e-10																0.03798	-1.7193e-10	-1.48237e-10	-7.04368e-11
		0.038	-1.71913e-10	-9.72453e-11	-1.25084e-10																0.038	-1.71913e-10	-1.48226e-10	-7.04365e-11
		0.03802	-1.71896e-10	-9.72675e-11	-1.25083e-10																0.03802	-1.71896e-10	-1.48216e-10	-7.04353e-11
		0.03804	-1.71879e-10	-9.729e-11	-1.25082e-10																0.03804	-1.71879e-10	-1.48206e-10	-7.04333e-11
		0.03806	-1.7186e-10	-9.73128e-11	-1.25081e-10																0.03806	-1.7186e-10	-1.48196e-10	-7.04303e-11
		0.03808	-1.71841e-10	-9.73359e-11	-1.25078e-10																0.03808	-1.71841e-10	-1.48186e-10	-7.04264e-11
		0.0381	-1.71821e-10	-9.73593e-11	-1.25075e-10																0.0381	-1.71821e-10	-1.48176e-10	-7.04217e-11
		0.03812	-1.718e-10	-9.73829e-11	-1.2507e-10																0.03812	-1.718e-10	-1.48165e-10	-7.04161e-11
		0.03814	-1.71778e-10	-9.74066e-11	-1.25065e-10																0.03814	-1.71778e-10	-1.48154e-10	-7.04098e-11
		0.03816	-1.71755e-10	-9.74305e-11	-1.25058e-10																0.03816	-1.71755e-10	-1.48142e-10	-7.0403e-11
		0.03818	-1.71731e-10	-9.74543e-11	-1.25051e-10																0.03818	-1.71731e-10	-1.4813e-10	-7.03959e-11
		0.0382	-1.71706e-10	-9.74781e-11	-1.25042e-10																0.0382	-1.71706e-10	-1.48118e-10	-7.03885e-11
		0.03822	-1.7168e-10	-9.75017e-11	-1.25032e-10																0.03822	-1.7168e-10	-1.48104e-10	-7.03812e-11
		0.03824	-1.71653e-10	-9.75251e-11	-1.25022e-10																0.03824	-1.71653e-10	-1.48091e-10	-7.03741e-11
		0.03826	-1.71625e-10	-9.75482e-11	-1.2501e-10																0.03826	-1.71625e-10	-1.48076e-10	-7.03672e-11
		0.03828	-1.71596e-10	-9.75708e-11	-1.24997e-10																0.03828	-1.71596e-10	-1.48061e-10	-7.03608e-11
		0.0383	-1.71565e-10	-9.7593e-11	-1.24984e-10																0.0383	-1.71565e-10	-1.48046e-10	-7.0355e-11
		0.03832	-1.71533e-10	-9.76147e-11	-1.2497e-10																0.03832	-1.71533e-10	-1.4803e-10	-7.03499e-11
		0.03834	-1.715e-10	-9.76359e-11	-1.24956e-10																0.03834	-1.715e-10	-1.48014e-10	-7.03455e-11
		0.03836	-1.71465e-10	-9.76566e-11	-1.24941e-10																0.03836	-1.71465e-10	-1.47997e-10	-7.0342e-11
		0.03838	-1.7143e-10	-9.76766e-11	-1.24926e-10																0.03838	-1.7143e-10	-1.47981e-10	-7.03395e-11
		0.0384	-1.71393e-10	-9.76959e-11	-1.24911e-10																0.0384	-1.71393e-10	-1.47965e-10	-7.03379e-11
		0.03842	-1.71355e-10	-9.77144e-11	-1.24895e-10																0.03842	-1.71355e-10	-1.47949e-10	-7.03375e-11
		0.03844	-1.71316e-10	-9.77319e-11	-1.24878e-10																0.03844	-1.71316e-10	-1.47933e-10	-7.0338e-11
		0.03846	-1.71277e-10	-9.77485e-11	-1.24861e-10																0.03846	-1.71277e-10	-1.47917e-10	-7.03396e-11
		0.03848	-1.71237e-10	-9.7764e-11	-1.24844e-10																0.03848	-1.71237e-10	-1.47902e-10	-7.03422e-11
		0.0385	-1.71196e-10	-9.77784e-11	-1.24826e-10																0.0385	-1.71196e-10	-1.47888e-10	-7.03456e-11
		0.03852	-1.71156e-10	-9.77918e-11	-1.24808e-10																0.03852	-1.71156e-10	-1.47874e-10	-7.03497e-11
		0.03854	-1.71115e-10	-9.78042e-11	-1.24789e-10																0.03854	-1.71115e-10	-1.4786e-10	-7.03545e-11
		0.03856	-1.71074e-10	-9.78157e-11	-1.2477e-10																0.03856	-1.71074e-10	-1.47847e-10	-7.03596e-11
		0.03858	-1.71034e-10	-9.78263e-11	-1.24751e-10																0.03858	-1.71034e-10	-1.47834e-10	-7.03651e-11
		0.0386	-1.70993e-10	-9.78361e-11	-1.24731e-10																0.0386	-1.70993e-10	-1.47822e-10	-7.03708e-11
		0.03862	-1.70954e-10	-9.78452e-11	-1.24711e-10																0.03862	-1.70954e-10	-1.47811e-10	-7.03767e-11
		0.03864	-1.70914e-10	-9.78535e-11	-1.24692e-10																0.03864	-1.70914e-10	-1.47801e-10	-7.03829e-11
		0.03866	-1.70876e-10	-9.78612e-11	-1.24671e-10																0.03866	-1.70876e-10	-1.47792e-10	-7.03893e-11
		0.03868	-1.70839e-10	-9.78681e-11	-1.2465e-10																0.03868	-1.70839e-10	-1.47783e-10	-7.0396e-11
		0.0387	-1.70802e-10	-9.78743e-11	-1.24629e-10																0.0387	-1.70802e-10	-1.47775e-10	-7.04031e-11
		0.03872	-1.70767e-10	-9.78798e-11	-1.24606e-10																0.03872	-1.70767e-10	-1.47768e-10	-7.04108e-11
		0.03874	-1.70733e-10	-9.78846e-11	-1.24583e-10																0.03874	-1.70733e-10	-1.47762e-10	-7.04189e-11
		0.03876	-1.70701e-10	-9.78886e-11	-1.24559e-10																0.03876	-1.70701e-10	-1.47757e-10	-7.04275e-11
		0.03878	-1.7067e-10	-9.78918e-11	-1.24534e-10																0.03878	-1.7067e-10	-1.47752e-10	-7.04367e-11
		0.0388	-1.7064e-10	-9.78943e-11	-1.24509e-10																0.0388	-1.7064e-10	-1.47748e-10	-7.04463e-11
		0.03882	-1.70613e-10	-9.78959e-11	-1.24483e-10																0.03882	-1.70613e-10	-1.47745e-10	-7.04563e-11
		0.03884	-1.70587e-10	-9.78968e-11	-1.24457e-10																0.03884	-1.70587e-10	-1.47743e-10	-7.04666e-11
		0.03886	-1.70563e-10	-9.7897e-11	-1.2443e-10																0.03886	-1.70563e-10	-1.47741e-10	-7.04772e-11
		0.03888	-1.70541e-10	-9.78967e-11	-1.24403e-10																0.03888	-1.70541e-10	-1.47741e-10	-7.04879e-11
		0.0389	-1.70521e-10	-9.78959e-11	-1.24375e-10																0.0389	-1.70521e-10	-1.47742e-10	-7.04987e-11
		0.03892	-1.70503e-10	-9.78949e-11	-1.24347e-10																0.03892	-1.70503e-10	-1.47744e-10	-7.05095e-11
		0.03894	-1.70486e-10	-9.78938e-11	-1.2432e-10																0.03894	-1.70486e-10	-1.47747e-10	-7.05203e-11
		0.03896	-1.70472e-10	-9.78927e-11	-1.24292e-10																0.03896	-1.70472e-10	-1.47752e-10	-7.05309e-11
		0.03898	-1.70459e-10	-9.78918e-11	-1.24264e-10																0.03898	-1.70459e-10	-1.47759e-10	-7.05413e-11
		0.039	-1.70449e-10	-9.78912e-11	-1.24236e-10																0.039	-1.70449e-10	-1.47767e-10	-7.05515e-11
		0.03902	-1.7044e-10	-9.7891e-11	-1.24208e-10																0.03902	-1.7044e-10	-1.47777e-10	-7.05613e-11
		0.03904	-1.70433e-10	-9.78913e-11	-1.2418e-10																0.03904	-1.70433e-10	-1.47788e-10	-7.05709e-11
		0.03906	-1.70427e-10	-9.78921e-11	-1.24152e-10																0.03906	-1.70427e-10	-1.47801e-10	-7.05803e-11
		0.03908	-1.70424e-10	-9.78935e-11	-1.24125e-10																0.03908	-1.70424e-10	-1.47815e-10	-7.05896e-11
		0.0391	-1.70422e-10	-9.78955e-11	-1.24098e-10																0.0391	-1.70422e-10	-1.47831e-10	-7.05989e-11
		0.03912	-1.70421e-10	-9.78984e-11	-1.24071e-10																0.03912	-1.70421e-10	-1.47849e-10	-7.06083e-11
		0.03914	-1.70423e-10	-9.79019e-11	-1.24045e-10																0.03914	-1.70423e-10	-1.47867e-10	-7.06177e-11
		0.03916	-1.70425e-10	-9.79062e-11	-1.24019e-10																0.03916	-1.70425e-10	-1.47886e-10	-7.06272e-11
		0.03918	-1.7043e-10	-9.79116e-11	-1.23993e-10																0.03918	-1.7043e-10	-1.47906e-10	-7.06367e-11
		0.0392	-1.70435e-10	-9.7918e-11	-1.23969e-10																0.0392	-1.70435e-10	-1.47926e-10	-7.06462e-11
		0.03922	-1.70441e-10	-9.79257e-11	-1.23944e-10																0.03922	-1.70441e-10	-1.47947e-10	-7.06558e-11
		0.03924	-1.70448e-10	-9.79346e-11	-1.23921e-10																0.03924	-1.70448e-10	-1.47968e-10	-7.06656e-11
		0.03926	-1.70456e-10	-9.7945e-11	-1.23898e-10																0.03926	-1.70456e-10	-1.47988e-10	-7.06756e-11
		0.03928	-1.70465e-10	-9.79566e-11	-1.23876e-10																0.03928	-1.70465e-10	-1.48009e-10	-7.0686e-11
		0.0393	-1.70475e-10	-9.79696e-11	-1.23855e-10																0.0393	-1.70475e-10	-1.48029e-10	-7.06968e-11
		0.03932	-1.70485e-10	-9.79838e-11	-1.23834e-10																0.03932	-1.70485e-10	-1.48049e-10	-7.07081e-11
		0.03934	-1.70495e-10	-9.79989e-11	-1.23815e-10																0.03934	-1.70495e-10	-1.48069e-10	-7.072e-11
		0.03936	-1.70507e-10	-9.80149e-11	-1.23796e-10																0.03936	-1.70507e-10	-1.48089e-10	-7.07325e-11
		0.03938	-1.70518e-10	-9.80317e-11	-1.23778e-10																0.03938	-1.70518e-10	-1.48108e-10	-7.07457e-11
		0.0394	-1.70531e-10	-9.8049e-11	-1.23761e-10																0.0394	-1.70531e-10	-1.48127e-10	-7.07594e-11
		0.03942	-1.70543e-10	-9.80669e-11	-1.23745e-10																0.03942	-1.70543e-10	-1.48146e-10	-7.07737e-11
		0.03944	-1.70556e-10	-9.80851e-11	-1.23731e-10																0.03944	-1.70556e-10	-1.48165e-10	-7.07886e-11
		0.03946	-1.70569e-10	-9.81038e-11	-1.23718e-10																0.03946	-1.70569e-10	-1.48183e-10	-7.08039e-11
		0.03948	-1.70582e-10	-9.81229e-11	-1.23707e-10																0.03948	-1.70582e-10	-1.48201e-10	-7.08195e-11
		0.0395	-1.70595e-10	-9.81425e-11	-1.23697e-10																0.0395	-1.70595e-10	-1.48219e-10	-7.08354e-11
		0.03952	-1.70608e-10	-9.81626e-11	-1.23689e-10																0.03952	-1.70608e-10	-1.48236e-10	-7.08514e-11
		0.03954	-1.7062e-10	-9.81832e-11	-1.23683e-10																0.03954	-1.7062e-10	-1.48252e-10	-7.08675e-11
		0.03956	-1.70632e-10	-9.82043e-11	-1.23677e-10																0.03956	-1.70632e-10	-1.48268e-10	-7.08836e-11
		0.03958	-1.70643e-10	-9.82259e-11	-1.23674e-10																0.03958	-1.70643e-10	-1.48284e-10	-7.08996e-11
		0.0396	-1.70653e-10	-9.8248e-11	-1.23671e-10																0.0396	-1.70653e-10	-1.48298e-10	-7.09153e-11
		0.03962	-1.70663e-10	-9.82706e-11	-1.2367e-10																0.03962	-1.70663e-10	-1.48312e-10	-7.09308e-11
		0.03964	-1.70672e-10	-9.82937e-11	-1.2367e-10																0.03964	-1.70672e-10	-1.48326e-10	-7.0946e-11
		0.03966	-1.7068e-10	-9.83172e-11	-1.23671e-10																0.03966	-1.7068e-10	-1.48339e-10	-7.09607e-11
		0.03968	-1.70687e-10	-9.83411e-11	-1.23672e-10																0.03968	-1.70687e-10	-1.48351e-10	-7.09749e-11
		0.0397	-1.70694e-10	-9.83655e-11	-1.23675e-10																0.0397	-1.70694e-10	-1.48364e-10	-7.09885e-11
		0.03972	-1.70699e-10	-9.83902e-11	-1.23678e-10																0.03972	-1.70699e-10	-1.48375e-10	-7.10014e-11
		0.03974	-1.70703e-10	-9.84151e-11	-1.23682e-10																0.03974	-1.70703e-10	-1.48386e-10	-7.10135e-11
		0.03976	-1.70706e-10	-9.84403e-11	-1.23687e-10																0.03976	-1.70706e-10	-1.48397e-10	-7.10249e-11
		0.03978	-1.70707e-10	-9.84656e-11	-1.23692e-10																0.03978	-1.70707e-10	-1.48406e-10	-7.10355e-11
		0.0398	-1.70707e-10	-9.84909e-11	-1.23698e-10																0.0398	-1.70707e-10	-1.48415e-10	-7.10455e-11
		0.03982	-1.70706e-10	-9.85163e-11	-1.23704e-10																0.03982	-1.70706e-10	-1.48423e-10	-7.10549e-11
		0.03984	-1.70703e-10	-9.85416e-11	-1.23711e-10																0.03984	-1.70703e-10	-1.48429e-10	-7.10639e-11
		0.03986	-1.70698e-10	-9.85669e-11	-1.23717e-10																0.03986	-1.70698e-10	-1.48435e-10	-7.10724e-11
		0.03988	-1.70692e-10	-9.85918e-11	-1.23724e-10																0.03988	-1.70692e-10	-1.48439e-10	-7.10807e-11
		0.0399	-1.70685e-10	-9.86165e-11	-1.23731e-10																0.0399	-1.70685e-10	-1.48442e-10	-7.10888e-11
		0.03992	-1.70675e-10	-9.86406e-11	-1.23739e-10																0.03992	-1.70675e-10	-1.48443e-10	-7.10968e-11
[truncated: 248,305+ more rows]

## Sheet: 25 Hz data, Fig 6B, D
		Figure 6B_sample EPSC traces					Figure 6B_normalized EPSC amplitude vs stimulation (#)								Figure 6B_average facilitation at EPSCs (#26-30)						Figure 6D_sample EPSC traces					Figure 6D_normalized EPSC amplitude vs stimulation (#)								Figure 6D_average facilitation at EPSCs (#26-30)
		Time (s)	Control	Dynasore	Pitstop-2		Stimulation (#)	Control		Dynasore		Pitstop-2				Control	Dynasore	Pitstop-2			Time (s)	Control	ML141	Latrunculin-B		Stimulation (#)	Control		ML141		Latrunculin-B				Control	ML141	Latrunculin-B
								Mean	SEM	Mean	SEM	Mean	SEM		Mean	2.65	0.94	1.62									Mean	SEM	Mean	SEM	Mean	SEM		Mean	2.65	2.53	2.48
		0	-4.08506e-10	-3.78969e-11	-1.23977e-10		1	1	0	1	0	1	0		SEM	0.29	0.09	0.18			0	-4.08506e-10	3.13971e-12	-8.01916e-11		1	1	0	1	0	1	0		SEM	0.29	0.19	0.25
		2e-05	-4.08505e-10	-3.78965e-11	-1.23977e-10		2	1.78958	0.128202	1.73434	0.122848	1.99795	0.151913		n number	16	11	14			2e-05	-4.08505e-10	3.14125e-12	-8.01907e-11		2	1.78958	0.128202	2.79566	0.314891	2.62656	0.164226		n number	16	10	11
		4e-05	-4.08503e-10	-3.78953e-11	-1.23976e-10		3	2.64514	0.147331	2.06578	0.0892201	2.25014	0.177909		p-value	vs Control	2.6e-05	0.007			4e-05	-4.08503e-10	3.14582e-12	-8.01878e-11		3	2.64514	0.147331	3.47399	0.356592	3.27749	0.361512		p-value	--	0.77	0.68
		6e-05	-4.085e-10	-3.78932e-11	-1.23975e-10		4	2.96847	0.210038	1.95621	0.107528	2.24218	0.142331		p-value	--	vs Dynasore	0.005			6e-05	-4.085e-10	3.1533e-12	-8.01832e-11		4	2.96847	0.210038	3.63334	0.355695	3.27936	0.334262
		8e-05	-4.08496e-10	-3.78902e-11	-1.23973e-10		5	3.35062	0.278485	1.92844	0.132008	1.95722	0.155304								8e-05	-4.08496e-10	3.16351e-12	-8.01769e-11		5	3.35062	0.278485	3.44221	0.361759	3.28904	0.335703
		0.0001	-4.0849e-10	-3.78862e-11	-1.23971e-10		6	3.36576	0.3185	1.80032	0.111255	2.29236	0.233124								0.0001	-4.0849e-10	3.17615e-12	-8.01692e-11		6	3.36576	0.3185	3.59649	0.349803	3.30833	0.405755
		0.00012	-4.08483e-10	-3.78811e-11	-1.23969e-10		7	3.37975	0.305929	1.93063	0.180374	2.02329	0.210144								0.00012	-4.08483e-10	3.19094e-12	-8.01601e-11		7	3.37975	0.305929	3.51649	0.406623	3.18833	0.382818
		0.00014	-4.08473e-10	-3.78749e-11	-1.23965e-10		8	3.38541	0.281238	1.7558	0.0901616	2.33148	0.186235								0.00014	-4.08473e-10	3.20759e-12	-8.015e-11		8	3.38541	0.281238	3.37518	0.30932	3.07818	0.371183
		0.00016	-4.08462e-10	-3.78674e-11	-1.23961e-10		9	3.35761	0.32367	1.67919	0.105019	2.17947	0.232754								0.00016	-4.08462e-10	3.22584e-12	-8.01388e-11		9	3.35761	0.32367	3.32307	0.317592	3.15656	0.278887
		0.00018	-4.08449e-10	-3.78588e-11	-1.23957e-10		10	3.30307	0.322848	1.68841	0.104491	2.309	0.232755								0.00018	-4.08449e-10	3.24545e-12	-8.01267e-11		10	3.30307	0.322848	3.24471	0.334563	3.18832	0.340379
		0.0002	-4.08435e-10	-3.7849e-11	-1.23951e-10		11	3.29701	0.342767	1.55361	0.120875	2.11861	0.175064								0.0002	-4.08435e-10	3.2662e-12	-8.01138e-11		11	3.29701	0.342767	3.57207	0.347726	2.98752	0.313008
		0.00022	-4.08419e-10	-3.78382e-11	-1.23945e-10		12	3.48151	0.363369	1.599	0.11334	2.11164	0.218296								0.00022	-4.08419e-10	3.28791e-12	-8.01002e-11		12	3.48151	0.363369	3.30376	0.335991	3.0572	0.37333
		0.00024	-4.08402e-10	-3.78267e-11	-1.23939e-10		13	3.09424	0.305844	1.53506	0.122533	2.15773	0.189637								0.00024	-4.08402e-10	3.31037e-12	-8.00859e-11		13	3.09424	0.305844	3.3855	0.344691	3.23355	0.455934
		0.00026	-4.08385e-10	-3.78145e-11	-1.23932e-10		14	3.14617	0.340418	1.47695	0.0848559	2.08065	0.220551								0.00026	-4.08385e-10	3.33333e-12	-8.00711e-11		14	3.14617	0.340418	3.50426	0.294462	3.56311	0.517694
		0.00028	-4.08366e-10	-3.78018e-11	-1.23925e-10		15	3.04987	0.383749	1.34979	0.074984	2.03773	0.167827								0.00028	-4.08366e-10	3.3565e-12	-8.00557e-11		15	3.04987	0.383749	3.16192	0.262354	2.88302	0.256844
		0.0003	-4.08346e-10	-3.77889e-11	-1.23917e-10		16	3.37541	0.374337	1.34645	0.0563781	2.12479	0.235575								0.0003	-4.08346e-10	3.37961e-12	-8.004e-11		16	3.37541	0.374337	3.25026	0.273002	3.09477	0.372268
		0.00032	-4.08326e-10	-3.77756e-11	-1.2391e-10		17	2.88459	0.319	1.35769	0.0745909	2.1014	0.220238								0.00032	-4.08326e-10	3.40232e-12	-8.00238e-11		17	2.88459	0.319	3.26763	0.282001	2.871	0.351112
		0.00034	-4.08305e-10	-3.77622e-11	-1.23901e-10		18	2.99467	0.340174	1.24018	0.100967	2.11943	0.20624								0.00034	-4.08305e-10	3.42429e-12	-8.00075e-11		18	2.99467	0.340174	3.47763	0.35014	3.01553	0.269627
		0.00036	-4.08283e-10	-3.77487e-11	-1.23892e-10		19	3.13965	0.295483	1.2339	0.114862	1.8516	0.157902								0.00036	-4.08283e-10	3.44515e-12	-7.99909e-11		19	3.13965	0.295483	3.09307	0.223037	3.10808	0.395382
		0.00038	-4.08261e-10	-3.77352e-11	-1.23883e-10		20	2.84758	0.362486	1.2852	0.123421	1.77138	0.197565								0.00038	-4.08261e-10	3.4646e-12	-7.99742e-11		20	2.84758	0.362486	3.07898	0.240438	2.9678	0.253969
		0.0004	-4.08239e-10	-3.77217e-11	-1.23872e-10		21	2.9566	0.369241	1.25507	0.091692	1.68238	0.182652								0.0004	-4.08239e-10	3.48236e-12	-7.99574e-11		21	2.9566	0.369241	3.00243	0.249559	2.96713	0.359563
		0.00042	-4.08216e-10	-3.77084e-11	-1.23862e-10		22	3.02989	0.325601	1.17016	0.114127	1.78398	0.157273								0.00042	-4.08216e-10	3.49819e-12	-7.99406e-11		22	3.02989	0.325601	3.15078	0.233604	2.90311	0.308973
		0.00044	-4.08192e-10	-3.76953e-11	-1.2385e-10		23	3.05882	0.355164	1.17027	0.117157	1.66221	0.169288								0.00044	-4.08192e-10	3.51187e-12	-7.99236e-11		23	3.05882	0.355164	2.89173	0.259727	2.66423	0.311861
		0.00046	-4.08169e-10	-3.76826e-11	-1.23838e-10		24	2.87257	0.284924	1.1639	0.129243	1.82883	0.190646								0.00046	-4.08169e-10	3.52326e-12	-7.99068e-11		24	2.87257	0.284924	2.98226	0.283495	2.71449	0.237995
		0.00048	-4.08144e-10	-3.76701e-11	-1.23826e-10		25	2.67314	0.328179	1.10202	0.0876817	1.91192	0.225104								0.00048	-4.08144e-10	3.53222e-12	-7.989e-11		25	2.67314	0.328179	2.92315	0.2852	2.8632	0.378082
		0.0005	-4.0812e-10	-3.76579e-11	-1.23813e-10		26	2.74007	0.293161	1.04027	0.0851343	1.65754	0.234213								0.0005	-4.0812e-10	3.5387e-12	-7.98735e-11		26	2.74007	0.293161	2.58282	0.206598	2.57248	0.281611
		0.00052	-4.08096e-10	-3.7646e-11	-1.23799e-10		27	2.55826	0.274005	0.914126	0.129125	1.60694	0.197594								0.00052	-4.08096e-10	3.54263e-12	-7.98575e-11		27	2.55826	0.274005	2.5659	0.174439	2.5459	0.235263
		0.00054	-4.08071e-10	-3.76346e-11	-1.23785e-10		28	2.67071	0.30566	0.970904	0.091779	1.79803	0.234729								0.00054	-4.08071e-10	3.54394e-12	-7.98421e-11		28	2.67071	0.30566	2.46479	0.210406	2.48593	0.283773
		0.00056	-4.08048e-10	-3.76236e-11	-1.23771e-10		29	2.62912	0.312356	0.894597	0.089921	1.54388	0.171172								0.00056	-4.08048e-10	3.54255e-12	-7.98277e-11		29	2.62912	0.312356	2.68495	0.215101	2.44515	0.298822
		0.00058	-4.08025e-10	-3.76132e-11	-1.23757e-10		30	2.63707	0.333108	0.895295	0.113405	1.48784	0.180161								0.00058	-4.08025e-10	3.53829e-12	-7.98143e-11		30	2.63707	0.333108	2.352	0.231414	2.34686	0.214542
		0.0006	-4.08003e-10	-3.76036e-11	-1.23742e-10																0.0006	-4.08003e-10	3.531e-12	-7.98022e-11
		0.00062	-4.07982e-10	-3.7595e-11	-1.23728e-10																0.00062	-4.07982e-10	3.52048e-12	-7.97916e-11
		0.00064	-4.07963e-10	-3.75875e-11	-1.23714e-10																0.00064	-4.07963e-10	3.50653e-12	-7.97825e-11
		0.00066	-4.07945e-10	-3.75813e-11	-1.23699e-10																0.00066	-4.07945e-10	3.48895e-12	-7.97751e-11
		0.00068	-4.07929e-10	-3.75766e-11	-1.23685e-10																0.00068	-4.07929e-10	3.46759e-12	-7.97694e-11
		0.0007	-4.07915e-10	-3.75735e-11	-1.2367e-10																0.0007	-4.07915e-10	3.44229e-12	-7.97652e-11
		0.00072	-4.07903e-10	-3.75721e-11	-1.23656e-10																0.00072	-4.07903e-10	3.41294e-12	-7.97625e-11
		0.00074	-4.07892e-10	-3.75724e-11	-1.23642e-10																0.00074	-4.07892e-10	3.37943e-12	-7.9761e-11
		0.00076	-4.07883e-10	-3.75744e-11	-1.23628e-10																0.00076	-4.07883e-10	3.34166e-12	-7.97607e-11
		0.00078	-4.07877e-10	-3.75779e-11	-1.23615e-10																0.00078	-4.07877e-10	3.29956e-12	-7.97613e-11
		0.0008	-4.07872e-10	-3.75829e-11	-1.23602e-10																0.0008	-4.07872e-10	3.25308e-12	-7.97625e-11
		0.00082	-4.07869e-10	-3.75893e-11	-1.23589e-10																0.00082	-4.07869e-10	3.20213e-12	-7.97642e-11
		0.00084	-4.07868e-10	-3.75969e-11	-1.23578e-10																0.00084	-4.07868e-10	3.1466e-12	-7.97662e-11
		0.00086	-4.07868e-10	-3.76058e-11	-1.23567e-10																0.00086	-4.07868e-10	3.08637e-12	-7.97683e-11
		0.00088	-4.07869e-10	-3.76156e-11	-1.23557e-10																0.00088	-4.07869e-10	3.0213e-12	-7.97705e-11
		0.0009	-4.0787e-10	-3.76263e-11	-1.23548e-10																0.0009	-4.0787e-10	2.95128e-12	-7.97728e-11
		0.00092	-4.07871e-10	-3.76378e-11	-1.2354e-10																0.00092	-4.07871e-10	2.87627e-12	-7.97752e-11
		0.00094	-4.07873e-10	-3.765e-11	-1.23533e-10																0.00094	-4.07873e-10	2.79629e-12	-7.97778e-11
		0.00096	-4.07875e-10	-3.76627e-11	-1.23527e-10																0.00096	-4.07875e-10	2.71139e-12	-7.97806e-11
		0.00098	-4.07877e-10	-3.7676e-11	-1.23522e-10																0.00098	-4.07877e-10	2.62174e-12	-7.97836e-11
		0.001	-4.07878e-10	-3.76896e-11	-1.23517e-10																0.001	-4.07878e-10	2.52761e-12	-7.97871e-11
		0.00102	-4.07879e-10	-3.77037e-11	-1.23514e-10																0.00102	-4.07879e-10	2.42941e-12	-7.97908e-11
		0.00104	-4.0788e-10	-3.7718e-11	-1.23513e-10																0.00104	-4.0788e-10	2.32757e-12	-7.97949e-11
		0.00106	-4.07879e-10	-3.77325e-11	-1.23512e-10																0.00106	-4.07879e-10	2.22253e-12	-7.97993e-11
		0.00108	-4.07878e-10	-3.77473e-11	-1.23513e-10																0.00108	-4.07878e-10	2.11469e-12	-7.98041e-11
		0.0011	-4.07876e-10	-3.77622e-11	-1.23516e-10																0.0011	-4.07876e-10	2.00443e-12	-7.98094e-11
		0.00112	-4.07874e-10	-3.77772e-11	-1.2352e-10																0.00112	-4.07874e-10	1.89209e-12	-7.9815e-11
		0.00114	-4.07871e-10	-3.77922e-11	-1.23525e-10																0.00114	-4.07871e-10	1.77796e-12	-7.98211e-11
		0.00116	-4.07867e-10	-3.78072e-11	-1.23531e-10																0.00116	-4.07867e-10	1.66227e-12	-7.98276e-11
		0.00118	-4.07862e-10	-3.78221e-11	-1.23539e-10																0.00118	-4.07862e-10	1.54518e-12	-7.98343e-11
		0.0012	-4.07857e-10	-3.7837e-11	-1.23548e-10																0.0012	-4.07857e-10	1.42681e-12	-7.98412e-11
		0.00122	-4.07852e-10	-3.78519e-11	-1.23559e-10																0.00122	-4.07852e-10	1.30728e-12	-7.98483e-11
		0.00124	-4.07845e-10	-3.78667e-11	-1.23571e-10																0.00124	-4.07845e-10	1.18671e-12	-7.98552e-11
		0.00126	-4.07838e-10	-3.78816e-11	-1.23584e-10																0.00126	-4.07838e-10	1.06529e-12	-7.98619e-11
		0.00128	-4.07831e-10	-3.78965e-11	-1.23598e-10																0.00128	-4.07831e-10	9.43291e-13	-7.98681e-11
		0.0013	-4.07823e-10	-3.79113e-11	-1.23615e-10																0.0013	-4.07823e-10	8.21011e-13	-7.98738e-11
		0.00132	-4.07814e-10	-3.79261e-11	-1.23632e-10																0.00132	-4.07814e-10	6.98808e-13	-7.98787e-11
		0.00134	-4.07804e-10	-3.79407e-11	-1.23651e-10																0.00134	-4.07804e-10	5.77089e-13	-7.98827e-11
		0.00136	-4.07794e-10	-3.79551e-11	-1.23672e-10																0.00136	-4.07794e-10	4.56287e-13	-7.98858e-11
		0.00138	-4.07784e-10	-3.79693e-11	-1.23694e-10																0.00138	-4.07784e-10	3.36845e-13	-7.98879e-11
		0.0014	-4.07772e-10	-3.79829e-11	-1.23718e-10																0.0014	-4.07772e-10	2.19218e-13	-7.98891e-11
		0.00142	-4.0776e-10	-3.79961e-11	-1.23743e-10																0.00142	-4.0776e-10	1.03871e-13	-7.98894e-11
		0.00144	-4.07748e-10	-3.80086e-11	-1.2377e-10																0.00144	-4.07748e-10	-8.73992e-15	-7.9889e-11
		0.00146	-4.07735e-10	-3.80204e-11	-1.23797e-10																0.00146	-4.07735e-10	-1.18154e-13	-7.98877e-11
		0.00148	-4.07722e-10	-3.80312e-11	-1.23826e-10																0.00148	-4.07722e-10	-2.23883e-13	-7.98856e-11
		0.0015	-4.0771e-10	-3.80411e-11	-1.23856e-10																0.0015	-4.0771e-10	-3.25461e-13	-7.98828e-11
		0.00152	-4.07697e-10	-3.80498e-11	-1.23887e-10																0.00152	-4.07697e-10	-4.22452e-13	-7.98793e-11
		0.00154	-4.07684e-10	-3.80573e-11	-1.2392e-10																0.00154	-4.07684e-10	-5.14443e-13	-7.98752e-11
		0.00156	-4.07672e-10	-3.80637e-11	-1.23953e-10																0.00156	-4.07672e-10	-6.01045e-13	-7.98707e-11
		0.00158	-4.07659e-10	-3.80687e-11	-1.23987e-10																0.00158	-4.07659e-10	-6.81892e-13	-7.98657e-11
		0.0016	-4.07646e-10	-3.80725e-11	-1.24022e-10																0.0016	-4.07646e-10	-7.56655e-13	-7.98605e-11
		0.00162	-4.07633e-10	-3.80749e-11	-1.24058e-10																0.00162	-4.07633e-10	-8.25077e-13	-7.98554e-11
		0.00164	-4.07619e-10	-3.80761e-11	-1.24094e-10																0.00164	-4.07619e-10	-8.86948e-13	-7.98503e-11
		0.00166	-4.07605e-10	-3.8076e-11	-1.24131e-10																0.00166	-4.07605e-10	-9.42097e-13	-7.98453e-11
		0.00168	-4.07591e-10	-3.80748e-11	-1.24167e-10																0.00168	-4.07591e-10	-9.90405e-13	-7.98406e-11
		0.0017	-4.07577e-10	-3.80725e-11	-1.24204e-10																0.0017	-4.07577e-10	-1.03183e-12	-7.98359e-11
		0.00172	-4.07562e-10	-3.80694e-11	-1.2424e-10																0.00172	-4.07562e-10	-1.0664e-12	-7.98314e-11
		0.00174	-4.07547e-10	-3.80655e-11	-1.24275e-10																0.00174	-4.07547e-10	-1.09416e-12	-7.98269e-11
		0.00176	-4.07533e-10	-3.8061e-11	-1.24309e-10																0.00176	-4.07533e-10	-1.11519e-12	-7.98227e-11
		0.00178	-4.07518e-10	-3.80559e-11	-1.24342e-10																0.00178	-4.07518e-10	-1.12957e-12	-7.98187e-11
		0.0018	-4.07504e-10	-3.80506e-11	-1.24374e-10																0.0018	-4.07504e-10	-1.13741e-12	-7.9815e-11
		0.00182	-4.07489e-10	-3.8045e-11	-1.24405e-10																0.00182	-4.07489e-10	-1.13882e-12	-7.98117e-11
		0.00184	-4.07475e-10	-3.80392e-11	-1.24434e-10																0.00184	-4.07475e-10	-1.1339e-12	-7.98089e-11
		0.00186	-4.07461e-10	-3.80333e-11	-1.24462e-10																0.00186	-4.07461e-10	-1.12281e-12	-7.98068e-11
		0.00188	-4.07448e-10	-3.80273e-11	-1.24488e-10																0.00188	-4.07448e-10	-1.10577e-12	-7.98054e-11
		0.0019	-4.07433e-10	-3.80211e-11	-1.24512e-10																0.0019	-4.07433e-10	-1.08306e-12	-7.98047e-11
		0.00192	-4.07419e-10	-3.80148e-11	-1.24534e-10																0.00192	-4.07419e-10	-1.05499e-12	-7.98049e-11
		0.00194	-4.07404e-10	-3.80082e-11	-1.24555e-10																0.00194	-4.07404e-10	-1.02192e-12	-7.98061e-11
		0.00196	-4.07388e-10	-3.80016e-11	-1.24573e-10																0.00196	-4.07388e-10	-9.84162e-13	-7.98084e-11
		0.00198	-4.07371e-10	-3.79947e-11	-1.24588e-10																0.00198	-4.07371e-10	-9.41955e-13	-7.9812e-11
		0.002	-4.07352e-10	-3.79878e-11	-1.24602e-10																0.002	-4.07352e-10	-8.95474e-13	-7.98169e-11
		0.00202	-4.07332e-10	-3.79807e-11	-1.24614e-10																0.00202	-4.07332e-10	-8.44894e-13	-7.98233e-11
		0.00204	-4.0731e-10	-3.79737e-11	-1.24624e-10																0.00204	-4.0731e-10	-7.90396e-13	-7.9831e-11
		0.00206	-4.07287e-10	-3.79666e-11	-1.24632e-10																0.00206	-4.07287e-10	-7.3219e-13	-7.98402e-11
		0.00208	-4.07261e-10	-3.79597e-11	-1.24639e-10																0.00208	-4.07261e-10	-6.70539e-13	-7.98507e-11
		0.0021	-4.07235e-10	-3.79532e-11	-1.24644e-10																0.0021	-4.07235e-10	-6.05784e-13	-7.98622e-11
		0.00212	-4.07207e-10	-3.79475e-11	-1.24647e-10																0.00212	-4.07207e-10	-5.3837e-13	-7.98746e-11
		0.00214	-4.0718e-10	-3.7943e-11	-1.24649e-10																0.00214	-4.0718e-10	-4.68825e-13	-7.98877e-11
		0.00216	-4.07154e-10	-3.79406e-11	-1.2465e-10																0.00216	-4.07154e-10	-3.97678e-13	-7.99013e-11
		0.00218	-4.07132e-10	-3.79411e-11	-1.24649e-10																0.00218	-4.07132e-10	-3.25453e-13	-7.99151e-11
		0.0022	-4.07115e-10	-3.79455e-11	-1.24647e-10																0.0022	-4.07115e-10	-2.52631e-13	-7.99294e-11
		0.00222	-4.07106e-10	-3.79548e-11	-1.24642e-10																0.00222	-4.07106e-10	-1.79644e-13	-7.9944e-11
		0.00224	-4.07108e-10	-3.79702e-11	-1.24635e-10																0.00224	-4.07108e-10	-1.06919e-13	-7.99593e-11
		0.00226	-4.07124e-10	-3.79931e-11	-1.24625e-10																0.00226	-4.07124e-10	-3.49765e-14	-7.99755e-11
		0.00228	-4.07159e-10	-3.80248e-11	-1.24609e-10																0.00228	-4.07159e-10	3.54494e-14	-7.99931e-11
		0.0023	-4.07215e-10	-3.80672e-11	-1.24588e-10																0.0023	-4.07215e-10	1.03336e-13	-8.0013e-11
		0.00232	-4.073e-10	-3.81223e-11	-1.24559e-10																0.00232	-4.073e-10	1.67337e-13	-8.0036e-11
		0.00234	-4.07417e-10	-3.81925e-11	-1.24522e-10																0.00234	-4.07417e-10	2.25747e-13	-8.00634e-11
		0.00236	-4.07574e-10	-3.82806e-11	-1.24475e-10																0.00236	-4.07574e-10	2.76429e-13	-8.00967e-11
		0.00238	-4.07776e-10	-3.83895e-11	-1.24418e-10																0.00238	-4.07776e-10	3.16793e-13	-8.01376e-11
		0.0024	-4.08032e-10	-3.85226e-11	-1.24349e-10																0.0024	-4.08032e-10	3.4383e-13	-8.01883e-11
		0.00242	-4.08347e-10	-3.86832e-11	-1.24269e-10																0.00242	-4.08347e-10	3.54129e-13	-8.02511e-11
		0.00244	-4.0873e-10	-3.8875e-11	-1.24176e-10																0.00244	-4.0873e-10	3.43941e-13	-8.03285e-11
		0.00246	-4.09187e-10	-3.91015e-11	-1.2407e-10																0.00246	-4.09187e-10	3.09211e-13	-8.04231e-11
		0.00248	-4.09727e-10	-3.93664e-11	-1.23952e-10																0.00248	-4.09727e-10	2.4563e-13	-8.0538e-11
		0.0025	-4.10356e-10	-3.96733e-11	-1.23822e-10																0.0025	-4.10356e-10	1.48722e-13	-8.06761e-11
		0.00252	-4.11082e-10	-4.00258e-11	-1.23681e-10																0.00252	-4.11082e-10	1.39263e-14	-8.08404e-11
		0.00254	-4.11911e-10	-4.04271e-11	-1.23529e-10																0.00254	-4.11911e-10	-1.63321e-13	-8.10341e-11
		0.00256	-4.12849e-10	-4.08805e-11	-1.23368e-10																0.00256	-4.12849e-10	-3.87498e-13	-8.12605e-11
		0.00258	-4.13904e-10	-4.13888e-11	-1.23198e-10																0.00258	-4.13904e-10	-6.6295e-13	-8.15228e-11
		0.0026	-4.15079e-10	-4.19548e-11	-1.23021e-10																0.0026	-4.15079e-10	-9.93897e-13	-8.18243e-11
		0.00262	-4.16381e-10	-4.2581e-11	-1.22839e-10																0.00262	-4.16381e-10	-1.38441e-12	-8.2168e-11
		0.00264	-4.17813e-10	-4.32697e-11	-1.22653e-10																0.00264	-4.17813e-10	-1.83841e-12	-8.25571e-11
		0.00266	-4.19381e-10	-4.4023e-11	-1.22464e-10																0.00266	-4.19381e-10	-2.35966e-12	-8.29946e-11
		0.00268	-4.21088e-10	-4.48427e-11	-1.22276e-10																0.00268	-4.21088e-10	-2.95176e-12	-8.34833e-11
		0.0027	-4.22936e-10	-4.57305e-11	-1.22089e-10																0.0027	-4.22936e-10	-3.61809e-12	-8.40259e-11
		0.00272	-4.24928e-10	-4.66876e-11	-1.21905e-10																0.00272	-4.24928e-10	-4.3618e-12	-8.4625e-11
		0.00274	-4.27066e-10	-4.7715e-11	-1.21728e-10																0.00274	-4.27066e-10	-5.18575e-12	-8.5283e-11
		0.00276	-4.29351e-10	-4.88135e-11	-1.21558e-10																0.00276	-4.29351e-10	-6.09245e-12	-8.60022e-11
		0.00278	-4.31783e-10	-4.99834e-11	-1.21398e-10																0.00278	-4.31783e-10	-7.08407e-12	-8.67846e-11
		0.0028	-4.34361e-10	-5.12248e-11	-1.21251e-10																0.0028	-4.34361e-10	-8.16238e-12	-8.76317e-11
		0.00282	-4.37085e-10	-5.25374e-11	-1.21117e-10																0.00282	-4.37085e-10	-9.32876e-12	-8.85452e-11
		0.00284	-4.39953e-10	-5.39207e-11	-1.21e-10																0.00284	-4.39953e-10	-1.05841e-11	-8.95262e-11
		0.00286	-4.42963e-10	-5.53736e-11	-1.20902e-10																0.00286	-4.42963e-10	-1.19291e-11	-9.05755e-11
		0.00288	-4.46112e-10	-5.68951e-11	-1.20825e-10																0.00288	-4.46112e-10	-1.33636e-11	-9.16939e-11
		0.0029	-4.49397e-10	-5.84837e-11	-1.2077e-10																0.0029	-4.49397e-10	-1.48874e-11	-9.28816e-11
		0.00292	-4.52812e-10	-6.01374e-11	-1.2074e-10																0.00292	-4.52812e-10	-1.64998e-11	-9.41387e-11
		0.00294	-4.56354e-10	-6.18544e-11	-1.20737e-10																0.00294	-4.56354e-10	-1.81996e-11	-9.54651e-11
		0.00296	-4.60016e-10	-6.36321e-11	-1.20763e-10																0.00296	-4.60016e-10	-1.99854e-11	-9.68604e-11
		0.00298	-4.63793e-10	-6.54681e-11	-1.20821e-10																0.00298	-4.63793e-10	-2.18553e-11	-9.83239e-11
		0.003	-4.67676e-10	-6.73596e-11	-1.20911e-10																0.003	-4.67676e-10	-2.38071e-11	-9.98547e-11
		0.00302	-4.7166e-10	-6.93035e-11	-1.21036e-10																0.00302	-4.7166e-10	-2.58384e-11	-1.01452e-10
		0.00304	-4.75735e-10	-7.12966e-11	-1.21198e-10																0.00304	-4.75735e-10	-2.79462e-11	-1.03113e-10
		0.00306	-4.79893e-10	-7.33352e-11	-1.21398e-10																0.00306	-4.79893e-10	-3.01275e-11	-1.04837e-10
		0.00308	-4.84125e-10	-7.54156e-11	-1.21636e-10																0.00308	-4.84125e-10	-3.23787e-11	-1.06622e-10
		0.0031	-4.88422e-10	-7.75336e-11	-1.21916e-10																0.0031	-4.88422e-10	-3.46959e-11	-1.08465e-10
		0.00312	-4.92774e-10	-7.9685e-11	-1.22237e-10																0.00312	-4.92774e-10	-3.70749e-11	-1.10363e-10
		0.00314	-4.9717e-10	-8.18652e-11	-1.226e-10																0.00314	-4.9717e-10	-3.9511e-11	-1.12314e-10
		0.00316	-5.01601e-10	-8.40694e-11	-1.23007e-10																0.00316	-5.01601e-10	-4.19992e-11	-1.14313e-10
		0.00318	-5.06055e-10	-8.62927e-11	-1.23457e-10																0.00318	-5.06055e-10	-4.45344e-11	-1.16358e-10
		0.0032	-5.10521e-10	-8.85299e-11	-1.23953e-10																0.0032	-5.10521e-10	-4.71107e-11	-1.18445e-10
		0.00322	-5.14989e-10	-9.07759e-11	-1.24493e-10																0.00322	-5.14989e-10	-4.97224e-11	-1.20569e-10
		0.00324	-5.19448e-10	-9.30253e-11	-1.2508e-10																0.00324	-5.19448e-10	-5.23634e-11	-1.22727e-10
		0.00326	-5.23886e-10	-9.52728e-11	-1.25711e-10																0.00326	-5.23886e-10	-5.50276e-11	-1.24915e-10
		0.00328	-5.28293e-10	-9.75132e-11	-1.26388e-10																0.00328	-5.28293e-10	-5.77087e-11	-1.27126e-10
		0.0033	-5.32658e-10	-9.97412e-11	-1.2711e-10																0.0033	-5.32658e-10	-6.04005e-11	-1.29358e-10
		0.00332	-5.3697e-10	-1.01952e-10	-1.27877e-10																0.00332	-5.3697e-10	-6.3097e-11	-1.31606e-10
		0.00334	-5.41218e-10	-1.0414e-10	-1.28687e-10																0.00334	-5.41218e-10	-6.57917e-11	-1.33864e-10
		0.00336	-5.45392e-10	-1.063e-10	-1.2954e-10																0.00336	-5.45392e-10	-6.84786e-11	-1.36128e-10
		0.00338	-5.49482e-10	-1.08428e-10	-1.30435e-10																0.00338	-5.49482e-10	-7.11514e-11	-1.38393e-10
		0.0034	-5.53478e-10	-1.10519e-10	-1.31371e-10																0.0034	-5.53478e-10	-7.38041e-11	-1.40655e-10
		0.00342	-5.57371e-10	-1.12568e-10	-1.32345e-10																0.00342	-5.57371e-10	-7.64306e-11	-1.42908e-10
		0.00344	-5.6115e-10	-1.1457e-10	-1.33357e-10																0.00344	-5.6115e-10	-7.90247e-11	-1.45147e-10
		0.00346	-5.64808e-10	-1.16521e-10	-1.34404e-10																0.00346	-5.64808e-10	-8.15805e-11	-1.47369e-10
		0.00348	-5.68337e-10	-1.18416e-10	-1.35486e-10																0.00348	-5.68337e-10	-8.40919e-11	-1.49567e-10
		0.0035	-5.71729e-10	-1.20252e-10	-1.36599e-10																0.0035	-5.71729e-10	-8.65532e-11	-1.51739e-10
		0.00352	-5.74976e-10	-1.22024e-10	-1.37742e-10																0.00352	-5.74976e-10	-8.89586e-11	-1.53879e-10
		0.00354	-5.78071e-10	-1.23728e-10	-1.38913e-10																0.00354	-5.78071e-10	-9.13027e-11	-1.55982e-10
		0.00356	-5.81009e-10	-1.25362e-10	-1.4011e-10																0.00356	-5.81009e-10	-9.35803e-11	-1.58045e-10
		0.00358	-5.83783e-10	-1.26922e-10	-1.4133e-10																0.00358	-5.83783e-10	-9.57865e-11	-1.60064e-10
		0.0036	-5.86389e-10	-1.28405e-10	-1.42571e-10																0.0036	-5.86389e-10	-9.79165e-11	-1.62033e-10
		0.00362	-5.88823e-10	-1.29808e-10	-1.43831e-10																0.00362	-5.88823e-10	-9.99657e-11	-1.6395e-10
		0.00364	-5.91081e-10	-1.31129e-10	-1.45106e-10																0.00364	-5.91081e-10	-1.0193e-10	-1.65809e-10
		0.00366	-5.93159e-10	-1.32366e-10	-1.46394e-10																0.00366	-5.93159e-10	-1.03805e-10	-1.67608e-10
		0.00368	-5.95055e-10	-1.33517e-10	-1.47693e-10																0.00368	-5.95055e-10	-1.05588e-10	-1.69343e-10
		0.0037	-5.96767e-10	-1.34581e-10	-1.48998e-10																0.0037	-5.96767e-10	-1.07276e-10	-1.71011e-10
		0.00372	-5.98294e-10	-1.35556e-10	-1.50308e-10																0.00372	-5.98294e-10	-1.08865e-10	-1.72608e-10
		0.00374	-5.99637e-10	-1.36442e-10	-1.5162e-10																0.00374	-5.99637e-10	-1.10354e-10	-1.74133e-10
		0.00376	-6.00795e-10	-1.37237e-10	-1.5293e-10																0.00376	-6.00795e-10	-1.11741e-10	-1.75583e-10
		0.00378	-6.0177e-10	-1.37944e-10	-1.54237e-10																0.00378	-6.0177e-10	-1.13023e-10	-1.76956e-10
		0.0038	-6.02564e-10	-1.3856e-10	-1.55537e-10																0.0038	-6.02564e-10	-1.142e-10	-1.7825e-10
		0.00382	-6.03179e-10	-1.39089e-10	-1.56827e-10																0.00382	-6.03179e-10	-1.15271e-10	-1.79463e-10
		0.00384	-6.03618e-10	-1.39529e-10	-1.58104e-10																0.00384	-6.03618e-10	-1.16236e-10	-1.80594e-10
		0.00386	-6.03887e-10	-1.39884e-10	-1.59366e-10																0.00386	-6.03887e-10	-1.17095e-10	-1.81643e-10
		0.00388	-6.03989e-10	-1.40155e-10	-1.60609e-10																0.00388	-6.03989e-10	-1.17847e-10	-1.82608e-10
		0.0039	-6.0393e-10	-1.40343e-10	-1.61832e-10																0.0039	-6.0393e-10	-1.18495e-10	-1.83489e-10
		0.00392	-6.03715e-10	-1.40452e-10	-1.63032e-10																0.00392	-6.03715e-10	-1.19039e-10	-1.84287e-10
		0.00394	-6.03351e-10	-1.40483e-10	-1.64205e-10																0.00394	-6.03351e-10	-1.1948e-10	-1.85001e-10
		0.00396	-6.02844e-10	-1.4044e-10	-1.65349e-10																0.00396	-6.02844e-10	-1.1982e-10	-1.85632e-10
		0.00398	-6.02203e-10	-1.40325e-10	-1.66463e-10																0.00398	-6.02203e-10	-1.20063e-10	-1.86181e-10
		0.004	-6.01434e-10	-1.40142e-10	-1.67544e-10																0.004	-6.01434e-10	-1.20209e-10	-1.86649e-10
		0.00402	-6.00546e-10	-1.39895e-10	-1.6859e-10																0.00402	-6.00546e-10	-1.20264e-10	-1.87037e-10
		0.00404	-5.99547e-10	-1.39587e-10	-1.696e-10																0.00404	-5.99547e-10	-1.20229e-10	-1.87347e-10
		0.00406	-5.98448e-10	-1.39223e-10	-1.7057e-10																0.00406	-5.98448e-10	-1.2011e-10	-1.87582e-10
		0.00408	-5.97256e-10	-1.38806e-10	-1.71501e-10																0.00408	-5.97256e-10	-1.19909e-10	-1.87743e-10
		0.0041	-5.95983e-10	-1.38341e-10	-1.72391e-10																0.0041	-5.95983e-10	-1.19631e-10	-1.87834e-10
		0.00412	-5.94636e-10	-1.37833e-10	-1.73237e-10																0.00412	-5.94636e-10	-1.19279e-10	-1.87858e-10
		0.00414	-5.93226e-10	-1.37286e-10	-1.7404e-10																0.00414	-5.93226e-10	-1.1886e-10	-1.87816e-10
		0.00416	-5.91762e-10	-1.36703e-10	-1.74797e-10																0.00416	-5.91762e-10	-1.18376e-10	-1.87715e-10
		0.00418	-5.90252e-10	-1.3609e-10	-1.75509e-10																0.00418	-5.90252e-10	-1.17832e-10	-1.87555e-10
		0.0042	-5.88704e-10	-1.3545e-10	-1.76175e-10																0.0042	-5.88704e-10	-1.17234e-10	-1.87342e-10
		0.00422	-5.87127e-10	-1.34787e-10	-1.76795e-10																0.00422	-5.87127e-10	-1.16587e-10	-1.87079e-10
		0.00424	-5.85528e-10	-1.34105e-10	-1.7737e-10																0.00424	-5.85528e-10	-1.15896e-10	-1.86771e-10
		0.00426	-5.83915e-10	-1.33409e-10	-1.77901e-10																0.00426	-5.83915e-10	-1.15167e-10	-1.8642e-10
		0.00428	-5.82295e-10	-1.32701e-10	-1.78389e-10																0.00428	-5.82295e-10	-1.14406e-10	-1.86031e-10
		0.0043	-5.80673e-10	-1.31984e-10	-1.78837e-10																0.0043	-5.80673e-10	-1.13616e-10	-1.85607e-10
		0.00432	-5.79055e-10	-1.31263e-10	-1.79245e-10																0.00432	-5.79055e-10	-1.12804e-10	-1.85152e-10
		0.00434	-5.77446e-10	-1.30539e-10	-1.79616e-10																0.00434	-5.77446e-10	-1.11973e-10	-1.8467e-10
		0.00436	-5.75849e-10	-1.29814e-10	-1.79951e-10																0.00436	-5.75849e-10	-1.11128e-10	-1.84163e-10
		0.00438	-5.74267e-10	-1.29091e-10	-1.80253e-10																0.00438	-5.74267e-10	-1.10271e-10	-1.83634e-10
		0.0044	-5.72704e-10	-1.28371e-10	-1.80524e-10																0.0044	-5.72704e-10	-1.09407e-10	-1.83086e-10
		0.00442	-5.71161e-10	-1.27655e-10	-1.80765e-10																0.00442	-5.71161e-10	-1.08538e-10	-1.82522e-10
		0.00444	-5.69639e-10	-1.26945e-10	-1.80979e-10																0.00444	-5.69639e-10	-1.07665e-10	-1.81943e-10
		0.00446	-5.6814e-10	-1.2624e-10	-1.81168e-10																0.00446	-5.6814e-10	-1.06791e-10	-1.81352e-10
		0.00448	-5.66665e-10	-1.25543e-10	-1.81334e-10																0.00448	-5.66665e-10	-1.05918e-10	-1.8075e-10
		0.0045	-5.65214e-10	-1.24852e-10	-1.81477e-10																0.0045	-5.65214e-10	-1.05046e-10	-1.8014e-10
		0.00452	-5.63788e-10	-1.2417e-10	-1.81599e-10																0.00452	-5.63788e-10	-1.04177e-10	-1.79523e-10
		0.00454	-5.62385e-10	-1.23496e-10	-1.81702e-10																0.00454	-5.62385e-10	-1.03312e-10	-1.789e-10
		0.00456	-5.61008e-10	-1.22831e-10	-1.81787e-10																0.00456	-5.61008e-10	-1.02452e-10	-1.78274e-10
		0.00458	-5.59654e-10	-1.22174e-10	-1.81856e-10																0.00458	-5.59654e-10	-1.01597e-10	-1.77644e-10
		0.0046	-5.58324e-10	-1.21526e-10	-1.81908e-10																0.0046	-5.58324e-10	-1.00749e-10	-1.77013e-10
		0.00462	-5.57018e-10	-1.20888e-10	-1.81946e-10																0.00462	-5.57018e-10	-9.99064e-11	-1.7638e-10
		0.00464	-5.55734e-10	-1.20258e-10	-1.81969e-10																0.00464	-5.55734e-10	-9.90709e-11	-1.75747e-10
		0.00466	-5.54473e-10	-1.19637e-10	-1.81979e-10																0.00466	-5.54473e-10	-9.82426e-11	-1.75114e-10
		0.00468	-5.53233e-10	-1.19026e-10	-1.81977e-10																0.00468	-5.53233e-10	-9.74216e-11	-1.74482e-10
		0.0047	-5.52014e-10	-1.18424e-10	-1.81963e-10																0.0047	-5.52014e-10	-9.6608e-11	-1.73852e-10
		0.00472	-5.50816e-10	-1.17831e-10	-1.81939e-10																0.00472	-5.50816e-10	-9.58018e-11	-1.73224e-10
		0.00474	-5.49637e-10	-1.17248e-10	-1.81905e-10																0.00474	-5.49637e-10	-9.5003e-11	-1.72599e-10
		0.00476	-5.48478e-10	-1.16674e-10	-1.81862e-10																0.00476	-5.48478e-10	-9.42117e-11	-1.71978e-10
		0.00478	-5.47336e-10	-1.16109e-10	-1.81811e-10																0.00478	-5.47336e-10	-9.34278e-11	-1.7136e-10
		0.0048	-5.46213e-10	-1.15554e-10	-1.81753e-10																0.0048	-5.46213e-10	-9.26514e-11	-1.70746e-10
		0.00482	-5.45107e-10	-1.15009e-10	-1.81688e-10																0.00482	-5.45107e-10	-9.18826e-11	-1.70138e-10
		0.00484	-5.44017e-10	-1.14473e-10	-1.81616e-10																0.00484	-5.44017e-10	-9.11212e-11	-1.69535e-10
		0.00486	-5.42943e-10	-1.13946e-10	-1.8154e-10																0.00486	-5.42943e-10	-9.03671e-11	-1.68938e-10
		0.00488	-5.41884e-10	-1.13429e-10	-1.81458e-10																0.00488	-5.41884e-10	-8.96205e-11	-1.68347e-10
		0.0049	-5.40839e-10	-1.12921e-10	-1.81373e-10																0.0049	-5.40839e-10	-8.88815e-11	-1.67763e-10
		0.00492	-5.39807e-10	-1.12421e-10	-1.81283e-10																0.00492	-5.39807e-10	-8.81501e-11	-1.67185e-10
		0.00494	-5.38788e-10	-1.1193e-10	-1.81189e-10																0.00494	-5.38788e-10	-8.74265e-11	-1.66614e-10
		0.00496	-5.37782e-10	-1.11446e-10	-1.81093e-10																0.00496	-5.37782e-10	-8.67109e-11	-1.6605e-10
		0.00498	-5.36787e-10	-1.1097e-10	-1.80993e-10																0.00498	-5.36787e-10	-8.60035e-11	-1.65492e-10
		0.005	-5.35803e-10	-1.10501e-10	-1.80891e-10																0.005	-5.35803e-10	-8.53044e-11	-1.64941e-10
		0.00502	-5.34831e-10	-1.10039e-10	-1.80787e-10																0.00502	-5.34831e-10	-8.46138e-11	-1.64396e-10
		0.00504	-5.33869e-10	-1.09583e-10	-1.8068e-10																0.00504	-5.33869e-10	-8.39319e-11	-1.63857e-10
		0.00506	-5.32919e-10	-1.09132e-10	-1.80571e-10																0.00506	-5.32919e-10	-8.32588e-11	-1.63323e-10
		0.00508	-5.31979e-10	-1.08687e-10	-1.8046e-10																0.00508	-5.31979e-10	-8.25946e-11	-1.62796e-10
		0.0051	-5.3105e-10	-1.08246e-10	-1.80348e-10																0.0051	-5.3105e-10	-8.19395e-11	-1.62274e-10
		0.00512	-5.30131e-10	-1.0781e-10	-1.80234e-10																0.00512	-5.30131e-10	-8.12936e-11	-1.61757e-10
		0.00514	-5.29221e-10	-1.07378e-10	-1.80119e-10																0.00514	-5.29221e-10	-8.06571e-11	-1.61246e-10
		0.00516	-5.2832e-10	-1.06949e-10	-1.80002e-10																0.00516	-5.2832e-10	-8.00299e-11	-1.6074e-10
		0.00518	-5.27425e-10	-1.06521e-10	-1.79884e-10																0.00518	-5.27425e-10	-7.94123e-11	-1.6024e-10
		0.0052	-5.26535e-10	-1.06095e-10	-1.79765e-10																0.0052	-5.26535e-10	-7.88045e-11	-1.59744e-10
		0.00522	-5.25646e-10	-1.05669e-10	-1.79645e-10																0.00522	-5.25646e-10	-7.82067e-11	-1.59254e-10
		0.00524	-5.24756e-10	-1.05241e-10	-1.79526e-10																0.00524	-5.24756e-10	-7.76193e-11	-1.58769e-10
		0.00526	-5.23862e-10	-1.0481e-10	-1.79408e-10																0.00526	-5.23862e-10	-7.70422e-11	-1.58289e-10
		0.00528	-5.22959e-10	-1.04374e-10	-1.79293e-10																0.00528	-5.22959e-10	-7.64756e-11	-1.57813e-10
		0.0053	-5.22044e-10	-1.03931e-10	-1.79183e-10																0.0053	-5.22044e-10	-7.59188e-11	-1.57342e-10
		0.00532	-5.21111e-10	-1.03479e-10	-1.79078e-10																0.00532	-5.21111e-10	-7.53711e-11	-1.56873e-10
		0.00534	-5.20156e-10	-1.03014e-10	-1.78979e-10																0.00534	-5.20156e-10	-7.4831e-11	-1.56406e-10
		0.00536	-5.19172e-10	-1.02534e-10	-1.7889e-10																0.00536	-5.19172e-10	-7.42968e-11	-1.5594e-10
		0.00538	-5.18154e-10	-1.02036e-10	-1.7881e-10																0.00538	-5.18154e-10	-7.37658e-11	-1.55471e-10
		0.0054	-5.17093e-10	-1.01515e-10	-1.7874e-10																0.0054	-5.17093e-10	-7.32351e-11	-1.55e-10
		0.00542	-5.15984e-10	-1.00969e-10	-1.78683e-10																0.00542	-5.15984e-10	-7.27012e-11	-1.54522e-10
		0.00544	-5.14818e-10	-1.00395e-10	-1.78637e-10																0.00544	-5.14818e-10	-7.21604e-11	-1.54036e-10
		0.00546	-5.13588e-10	-9.97877e-11	-1.78604e-10																0.00546	-5.13588e-10	-7.16085e-11	-1.53538e-10
		0.00548	-5.12287e-10	-9.91448e-11	-1.78584e-10																0.00548	-5.12287e-10	-7.10412e-11	-1.53026e-10
		0.0055	-5.10908e-10	-9.84626e-11	-1.78576e-10																0.0055	-5.10908e-10	-7.04542e-11	-1.52496e-10
		0.00552	-5.09442e-10	-9.77377e-11	-1.7858e-10																0.00552	-5.09442e-10	-6.98427e-11	-1.51945e-10
		0.00554	-5.07885e-10	-9.69669e-11	-1.78595e-10																0.00554	-5.07885e-10	-6.9202e-11	-1.5137e-10
		0.00556	-5.06229e-10	-9.61472e-11	-1.78619e-10																0.00556	-5.06229e-10	-6.85273e-11	-1.50766e-10
		0.00558	-5.04469e-10	-9.52756e-11	-1.78653e-10																0.00558	-5.04469e-10	-6.78137e-11	-1.50132e-10
		0.0056	-5.02598e-10	-9.43492e-11	-1.78693e-10																0.0056	-5.02598e-10	-6.70567e-11	-1.49463e-10
		0.00562	-5.00614e-10	-9.33657e-11	-1.78739e-10																0.00562	-5.00614e-10	-6.62517e-11	-1.48756e-10
		0.00564	-4.9851e-10	-9.23226e-11	-1.78789e-10																0.00564	-4.9851e-10	-6.53943e-11	-1.48008e-10
		0.00566	-4.96283e-10	-9.12178e-11	-1.78842e-10																0.00566	-4.96283e-10	-6.44805e-11	-1.47217e-10
		0.00568	-4.9393e-10	-9.00492e-11	-1.78896e-10																0.00568	-4.9393e-10	-6.35065e-11	-1.46378e-10
		0.0057	-4.91447e-10	-8.88154e-11	-1.78948e-10																0.0057	-4.91447e-10	-6.24687e-11	-1.4549e-10
		0.00572	-4.88833e-10	-8.75151e-11	-1.78998e-10																0.00572	-4.88833e-10	-6.13639e-11	-1.44549e-10
		0.00574	-4.86085e-10	-8.61472e-11	-1.79042e-10																0.00574	-4.86085e-10	-6.01892e-11	-1.43553e-10
		0.00576	-4.83203e-10	-8.47112e-11	-1.79078e-10																0.00576	-4.83203e-10	-5.89419e-11	-1.42499e-10
		0.00578	-4.80186e-10	-8.32068e-11	-1.79105e-10																0.00578	-4.80186e-10	-5.76195e-11	-1.41387e-10
		0.0058	-4.77035e-10	-8.16339e-11	-1.79121e-10																0.0058	-4.77035e-10	-5.62202e-11	-1.40213e-10
		0.00582	-4.73749e-10	-7.99928e-11	-1.79121e-10																0.00582	-4.73749e-10	-5.4742e-11	-1.38975e-10
		0.00584	-4.70332e-10	-7.82842e-11	-1.79105e-10																0.00584	-4.70332e-10	-5.31835e-11	-1.37672e-10
		0.00586	-4.66784e-10	-7.65091e-11	-1.79071e-10																0.00586	-4.66784e-10	-5.15436e-11	-1.36304e-10
		0.00588	-4.63109e-10	-7.46687e-11	-1.79015e-10																0.00588	-4.63109e-10	-4.98215e-11	-1.34867e-10
		0.0059	-4.59311e-10	-7.27644e-11	-1.78936e-10																0.0059	-4.59311e-10	-4.80168e-11	-1.33363e-10
		0.00592	-4.55394e-10	-7.07982e-11	-1.78831e-10																0.00592	-4.55394e-10	-4.61295e-11	-1.3179e-10
		0.00594	-4.51362e-10	-6.87721e-11	-1.78699e-10																0.00594	-4.51362e-10	-4.41603e-11	-1.30148e-10
		0.00596	-4.47223e-10	-6.66885e-11	-1.78538e-10																0.00596	-4.47223e-10	-4.21098e-11	-1.28437e-10
		0.00598	-4.42982e-10	-6.45501e-11	-1.78344e-10																0.00598	-4.42982e-10	-3.99796e-11	-1.26658e-10
		0.006	-4.38645e-10	-6.236e-11	-1.78117e-10																0.006	-4.38645e-10	-3.7771e-11	-1.24812e-10
		0.00602	-4.34221e-10	-6.01212e-11	-1.77855e-10																0.00602	-4.34221e-10	-3.54864e-11	-1.229e-10
		0.00604	-4.29717e-10	-5.78375e-11	-1.77555e-10																0.00604	-4.29717e-10	-3.31282e-11	-1.20923e-10
		0.00606	-4.2514e-10	-5.55126e-11	-1.77217e-10																0.00606	-4.2514e-10	-3.06994e-11	-1.18884e-10
		0.00608	-4.205e-10	-5.31504e-11	-1.76838e-10																0.00608	-4.205e-10	-2.82032e-11	-1.16783e-10
		0.0061	-4.15805e-10	-5.07553e-11	-1.76417e-10																0.0061	-4.15805e-10	-2.56434e-11	-1.14623e-10
		0.00612	-4.11064e-10	-4.83315e-11	-1.75954e-10																0.00612	-4.11064e-10	-2.3024e-11	-1.12407e-10
		0.00614	-4.06286e-10	-4.58836e-11	-1.75446e-10																0.00614	-4.06286e-10	-2.03493e-11	-1.10138e-10
		0.00616	-4.01481e-10	-4.34164e-11	-1.74894e-10																0.00616	-4.01481e-10	-1.76242e-11	-1.07818e-10
		0.00618	-3.96659e-10	-4.09346e-11	-1.74296e-10																0.00618	-3.96659e-10	-1.48533e-11	-1.0545e-10
		0.0062	-3.9183e-10	-3.84432e-11	-1.73652e-10																0.0062	-3.9183e-10	-1.20419e-11	-1.03039e-10
		0.00622	-3.87005e-10	-3.59474e-11	-1.72962e-10																0.00622	-3.87005e-10	-9.1954e-12	-1.00589e-10
		0.00624	-3.82194e-10	-3.34522e-11	-1.72225e-10																0.00624	-3.82194e-10	-6.3193e-12	-9.81023e-11
		0.00626	-3.77407e-10	-3.0963e-11	-1.71441e-10																0.00626	-3.77407e-10	-3.41945e-12	-9.55848e-11
		0.00628	-3.72655e-10	-2.84849e-11	-1.70611e-10																0.00628	-3.72655e-10	-5.01803e-13	-9.30405e-11
		0.0063	-3.67949e-10	-2.60232e-11	-1.69736e-10																0.0063	-3.67949e-10	2.42754e-12	-9.0474e-11
		0.00632	-3.63298e-10	-2.35831e-11	-1.68815e-10																0.00632	-3.63298e-10	5.36242e-12	-8.78902e-11
		0.00634	-3.58713e-10	-2.11696e-11	-1.6785e-10																0.00634	-3.58713e-10	8.29662e-12	-8.52936e-11
		0.00636	-3.54204e-10	-1.87879e-11	-1.66841e-10																0.00636	-3.54204e-10	1.12238e-11	-8.26893e-11
		0.00638	-3.4978e-10	-1.64428e-11	-1.6579e-10																0.00638	-3.4978e-10	1.41377e-11	-8.00821e-11
		0.0064	-3.45452e-10	-1.41392e-11	-1.64699e-10																0.0064	-3.45452e-10	1.70318e-11	-7.74769e-11
		0.00642	-3.41229e-10	-1.18817e-11	-1.63568e-10																0.00642	-3.41229e-10	1.98999e-11	-7.48787e-11
		0.00644	-3.37118e-10	-9.67477e-12	-1.62399e-10																0.00644	-3.37118e-10	2.27355e-11	-7.22923e-11
		0.00646	-3.3313e-10	-7.52286e-12	-1.61194e-10																0.00646	-3.3313e-10	2.55326e-11	-6.97227e-11
		0.00648	-3.29271e-10	-5.43006e-12	-1.59954e-10																0.00648	-3.29271e-10	2.82851e-11	-6.71745e-11
		0.0065	-3.25551e-10	-3.40027e-12	-1.58682e-10																0.0065	-3.25551e-10	3.0987e-11	-6.46527e-11
		0.00652	-3.21975e-10	-1.4372e-12	-1.5738e-10																0.00652	-3.21975e-10	3.36323e-11	-6.21619e-11
		0.00654	-3.18551e-10	4.5568e-13	-1.56049e-10																0.00654	-3.18551e-10	3.62154e-11	-5.97065e-11
		0.00656	-3.15285e-10	2.27517e-12	-1.54693e-10																0.00656	-3.15285e-10	3.87306e-11	-5.7291e-11
		0.00658	-3.12183e-10	4.0184e-12	-1.53314e-10																0.00658	-3.12183e-10	4.11725e-11	-5.492e-11
		0.0066	-3.09248e-10	5.6828e-12	-1.51915e-10																0.0066	-3.09248e-10	4.35358e-11	-5.25975e-11
		0.00662	-3.06485e-10	7.26616e-12	-1.50498e-10																0.00662	-3.06485e-10	4.58156e-11	-5.03277e-11
		0.00664	-3.03898e-10	8.76659e-12	-1.49067e-10																0.00664	-3.03898e-10	4.80073e-11	-4.81147e-11
		0.00666	-3.01489e-10	1.01825e-11	-1.47624e-10																0.00666	-3.01489e-10	5.01067e-11	-4.59622e-11
		0.00668	-2.99261e-10	1.15127e-11	-1.46173e-10																0.00668	-2.99261e-10	5.21099e-11	-4.38737e-11
		0.0067	-2.97215e-10	1.27561e-11	-1.44717e-10																0.0067	-2.97215e-10	5.40133e-11	-4.18526e-11
		0.00672	-2.95351e-10	1.39121e-11	-1.43258e-10																0.00672	-2.95351e-10	5.58139e-11	-3.99017e-11
		0.00674	-2.93671e-10	1.49802e-11	-1.41798e-10																0.00674	-2.93671e-10	5.7509e-11	-3.8024e-11
		0.00676	-2.92173e-10	1.59603e-11	-1.40343e-10																0.00676	-2.92173e-10	5.90964e-11	-3.62219e-11
		0.00678	-2.90857e-10	1.68525e-11	-1.38892e-10																0.00678	-2.90857e-10	6.05744e-11	-3.44978e-11
		0.0068	-2.89722e-10	1.76574e-11	-1.37451e-10																0.0068	-2.89722e-10	6.19416e-11	-3.28536e-11
		0.00682	-2.88763e-10	1.83757e-11	-1.36022e-10																0.00682	-2.88763e-10	6.31971e-11	-3.12909e-11
		0.00684	-2.8798e-10	1.90082e-11	-1.34607e-10																0.00684	-2.8798e-10	6.43403e-11	-2.98113e-11
		0.00686	-2.87368e-10	1.95564e-11	-1.3321e-10																0.00686	-2.87368e-10	6.53707e-11	-2.84159e-11
		0.00688	-2.86924e-10	2.00215e-11	-1.31833e-10																0.00688	-2.86924e-10	6.62887e-11	-2.71055e-11
		0.0069	-2.86642e-10	2.04054e-11	-1.3048e-10																0.0069	-2.86642e-10	6.70946e-11	-2.58808e-11
		0.00692	-2.86518e-10	2.07102e-11	-1.29152e-10																0.00692	-2.86518e-10	6.77894e-11	-2.47418e-11
		0.00694	-2.86545e-10	2.09383e-11	-1.27854e-10																0.00694	-2.86545e-10	6.83747e-11	-2.36887e-11
		0.00696	-2.86719e-10	2.10924e-11	-1.26586e-10																0.00696	-2.86719e-10	6.8852e-11	-2.27209e-11
		0.00698	-2.87031e-10	2.11754e-11	-1.25352e-10																0.00698	-2.87031e-10	6.92236e-11	-2.18379e-11
		0.007	-2.87474e-10	2.11908e-11	-1.24153e-10																0.007	-2.87474e-10	6.94922e-11	-2.10387e-11
		0.00702	-2.88041e-10	2.11422e-11	-1.22992e-10																0.00702	-2.88041e-10	6.96607e-11	-2.0322e-11
		0.00704	-2.88724e-10	2.10334e-11	-1.21871e-10																0.00704	-2.88724e-10	6.97324e-11	-1.96862e-11
		0.00706	-2.89513e-10	2.08684e-11	-1.20791e-10																0.00706	-2.89513e-10	6.97112e-11	-1.91293e-11
		0.00708	-2.904e-10	2.06515e-11	-1.19754e-10																0.00708	-2.904e-10	6.96013e-11	-1.86494e-11
		0.0071	-2.91376e-10	2.03871e-11	-1.18762e-10																0.0071	-2.91376e-10	6.94069e-11	-1.82439e-11
		0.00712	-2.92429e-10	2.00794e-11	-1.17816e-10																0.00712	-2.92429e-10	6.91327e-11	-1.79102e-11
		0.00714	-2.93553e-10	1.97328e-11	-1.16917e-10																0.00714	-2.93553e-10	6.87838e-11	-1.76455e-11
		0.00716	-2.94738e-10	1.93515e-11	-1.16065e-10																0.00716	-2.94738e-10	6.83652e-11	-1.74466e-11
		0.00718	-2.95976e-10	1.89394e-11	-1.15263e-10																0.00718	-2.95976e-10	6.78827e-11	-1.73103e-11
		0.0072	-2.97258e-10	1.85008e-11	-1.14509e-10																0.0072	-2.97258e-10	6.73418e-11	-1.72329e-11
		0.00722	-2.98577e-10	1.80395e-11	-1.13803e-10																0.00722	-2.98577e-10	6.67489e-11	-1.72106e-11
		0.00724	-2.99925e-10	1.75593e-11	-1.13146e-10																0.00724	-2.99925e-10	6.611e-11	-1.72397e-11
		0.00726	-3.01296e-10	1.70639e-11	-1.12535e-10																0.00726	-3.01296e-10	6.54314e-11	-1.7316e-11
		0.00728	-3.02683e-10	1.65569e-11	-1.11968e-10																0.00728	-3.02683e-10	6.47191e-11	-1.74357e-11
		0.0073	-3.0408e-10	1.60412e-11	-1.11445e-10																0.0073	-3.0408e-10	6.39788e-11	-1.75948e-11
		0.00732	-3.05483e-10	1.55198e-11	-1.10963e-10																0.00732	-3.05483e-10	6.32161e-11	-1.77895e-11
		0.00734	-3.06885e-10	1.4995e-11	-1.10519e-10																0.00734	-3.06885e-10	6.24359e-11	-1.80163e-11
		0.00736	-3.08283e-10	1.44687e-11	-1.10111e-10																0.00736	-3.08283e-10	6.16428e-11	-1.82718e-11
		0.00738	-3.09674e-10	1.39428e-11	-1.09738e-10																0.00738	-3.09674e-10	6.08407e-11	-1.85528e-11
		0.0074	-3.11054e-10	1.34187e-11	-1.09396e-10																0.0074	-3.11054e-10	6.00332e-11	-1.88565e-11
		0.00742	-3.12422e-10	1.28975e-11	-1.09084e-10																0.00742	-3.12422e-10	5.92234e-11	-1.91802e-11
		0.00744	-3.13777e-10	1.23804e-11	-1.08799e-10																0.00744	-3.13777e-10	5.84141e-11	-1.95217e-11
		0.00746	-3.15116e-10	1.18683e-11	-1.0854e-10																0.00746	-3.15116e-10	5.76076e-11	-1.98787e-11
		0.00748	-3.16439e-10	1.13619e-11	-1.08306e-10																0.00748	-3.16439e-10	5.6806e-11	-2.02493e-11
		0.0075	-3.17746e-10	1.08619e-11	-1.08093e-10																0.0075	-3.17746e-10	5.60111e-11	-2.06316e-11
		0.00752	-3.19036e-10	1.03688e-11	-1.07902e-10																0.00752	-3.19036e-10	5.52243e-11	-2.10239e-11
		0.00754	-3.20308e-10	9.88281e-12	-1.0773e-10																0.00754	-3.20308e-10	5.44467e-11	-2.14247e-11
		0.00756	-3.21562e-10	9.40427e-12	-1.07576e-10																0.00756	-3.21562e-10	5.36793e-11	-2.18326e-11
		0.00758	-3.22798e-10	8.93324e-12	-1.07439e-10																0.00758	-3.22798e-10	5.29227e-11	-2.22461e-11
		0.0076	-3.24015e-10	8.46978e-12	-1.07318e-10																0.0076	-3.24015e-10	5.21777e-11	-2.2664e-11
		0.00762	-3.25214e-10	8.01387e-12	-1.07211e-10																0.00762	-3.25214e-10	5.14447e-11	-2.30853e-11
		0.00764	-3.26395e-10	7.5654e-12	-1.07118e-10																0.00764	-3.26395e-10	5.07242e-11	-2.3509e-11
		0.00766	-3.27557e-10	7.12423e-12	-1.07037e-10																0.00766	-3.27557e-10	5.00164e-11	-2.39344e-11
		0.00768	-3.28702e-10	6.69018e-12	-1.06968e-10																0.00768	-3.28702e-10	4.93217e-11	-2.43606e-11
		0.0077	-3.29829e-10	6.26304e-12	-1.0691e-10																0.0077	-3.29829e-10	4.86406e-11	-2.4787e-11
		0.00772	-3.30938e-10	5.84262e-12	-1.06861e-10																0.00772	-3.30938e-10	4.79734e-11	-2.5213e-11
		0.00774	-3.3203e-10	5.42875e-12	-1.06821e-10																0.00774	-3.3203e-10	4.73203e-11	-2.5638e-11
		0.00776	-3.33106e-10	5.02129e-12	-1.0679e-10																0.00776	-3.33106e-10	4.66818e-11	-2.60616e-11
		0.00778	-3.34165e-10	4.62009e-12	-1.06766e-10																0.00778	-3.34165e-10	4.60582e-11	-2.64834e-11
		0.0078	-3.35208e-10	4.225e-12	-1.06749e-10																0.0078	-3.35208e-10	4.54494e-11	-2.69033e-11
		0.00782	-3.36235e-10	3.83593e-12	-1.06739e-10																0.00782	-3.36235e-10	4.48557e-11	-2.73211e-11
		0.00784	-3.37246e-10	3.45287e-12	-1.06735e-10																0.00784	-3.37246e-10	4.42768e-11	-2.77365e-11
		0.00786	-3.38242e-10	3.07573e-12	-1.06737e-10																0.00786	-3.38242e-10	4.37125e-11	-2.81497e-11
		0.00788	-3.39223e-10	2.70446e-12	-1.06744e-10																0.00788	-3.39223e-10	4.31626e-11	-2.85604e-11
		0.0079	-3.4019e-10	2.33894e-12	-1.06756e-10																0.0079	-3.4019e-10	4.26266e-11	-2.89687e-11
		0.00792	-3.41142e-10	1.97904e-12	-1.06774e-10																0.00792	-3.41142e-10	4.2104e-11	-2.93747e-11
		0.00794	-3.42079e-10	1.62456e-12	-1.06795e-10																0.00794	-3.42079e-10	4.15943e-11	-2.97784e-11
		0.00796	-3.43003e-10	1.27525e-12	-1.06821e-10																0.00796	-3.43003e-10	4.1097e-11	-3.01799e-11
		0.00798	-3.43912e-10	9.30845e-13	-1.06851e-10																0.00798	-3.43912e-10	4.06114e-11	-3.05792e-11
		0.008	-3.44808e-10	5.9111e-13	-1.06884e-10																0.008	-3.44808e-10	4.01371e-11	-3.09764e-11
		0.00802	-3.4569e-10	2.55841e-13	-1.0692e-10																0.00802	-3.4569e-10	3.96735e-11	-3.13714e-11
		0.00804	-3.46558e-10	-7.50953e-14	-1.06959e-10																0.00804	-3.46558e-10	3.92203e-11	-3.17642e-11
		0.00806	-3.47412e-10	-4.01795e-13	-1.07001e-10																0.00806	-3.47412e-10	3.87769e-11	-3.21549e-11
		0.00808	-3.48254e-10	-7.24336e-13	-1.07045e-10																0.00808	-3.48254e-10	3.83431e-11	-3.25432e-11
		0.0081	-3.49081e-10	-1.04278e-12	-1.07091e-10																0.0081	-3.49081e-10	3.79185e-11	-3.29294e-11
		0.00812	-3.49895e-10	-1.35718e-12	-1.07139e-10																0.00812	-3.49895e-10	3.75027e-11	-3.33132e-11
		0.00814	-3.50696e-10	-1.66759e-12	-1.07189e-10																0.00814	-3.50696e-10	3.70954e-11	-3.36947e-11
		0.00816	-3.51483e-10	-1.97408e-12	-1.07241e-10																0.00816	-3.51483e-10	3.66963e-11	-3.40738e-11
		0.00818	-3.52257e-10	-2.27672e-12	-1.07294e-10																0.00818	-3.52257e-10	3.63052e-11	-3.44504e-11
		0.0082	-3.53017e-10	-2.57554e-12	-1.0735e-10																0.0082	-3.53017e-10	3.59216e-11	-3.48243e-11
		0.00822	-3.53765e-10	-2.8706e-12	-1.07407e-10																0.00822	-3.53765e-10	3.55455e-11	-3.51953e-11
		0.00824	-3.54499e-10	-3.16189e-12	-1.07465e-10																0.00824	-3.54499e-10	3.51767e-11	-3.55634e-11
		0.00826	-3.5522e-10	-3.44941e-12	-1.07525e-10																0.00826	-3.5522e-10	3.48152e-11	-3.59283e-11
		0.00828	-3.55929e-10	-3.73316e-12	-1.07586e-10																0.00828	-3.55929e-10	3.44606e-11	-3.629e-11
		0.0083	-3.56625e-10	-4.0132e-12	-1.07649e-10																0.0083	-3.56625e-10	3.4113e-11	-3.66486e-11
		0.00832	-3.57308e-10	-4.28964e-12	-1.07712e-10																0.00832	-3.57308e-10	3.3772e-11	-3.7004e-11
		0.00834	-3.5798e-10	-4.56261e-12	-1.07776e-10																0.00834	-3.5798e-10	3.34374e-11	-3.73563e-11
		0.00836	-3.58639e-10	-4.83224e-12	-1.0784e-10																0.00836	-3.58639e-10	3.31088e-11	-3.77058e-11
		0.00838	-3.59286e-10	-5.09868e-12	-1.07905e-10																0.00838	-3.59286e-10	3.2786e-11	-3.80524e-11
		0.0084	-3.59921e-10	-5.36204e-12	-1.0797e-10																0.0084	-3.59921e-10	3.24687e-11	-3.83961e-11
		0.00842	-3.60545e-10	-5.62245e-12	-1.08035e-10																0.00842	-3.60545e-10	3.21566e-11	-3.87371e-11
		0.00844	-3.61157e-10	-5.87992e-12	-1.081e-10																0.00844	-3.61157e-10	3.18494e-11	-3.90753e-11
		0.00846	-3.61757e-10	-6.13442e-12	-1.08165e-10																0.00846	-3.61757e-10	3.15469e-11	-3.94107e-11
		0.00848	-3.62345e-10	-6.38588e-12	-1.08229e-10																0.00848	-3.62345e-10	3.12487e-11	-3.97435e-11
		0.0085	-3.62922e-10	-6.63423e-12	-1.08294e-10																0.0085	-3.62922e-10	3.09545e-11	-4.00737e-11
		0.00852	-3.63488e-10	-6.87939e-12	-1.08358e-10																0.00852	-3.63488e-10	3.06641e-11	-4.04016e-11
		0.00854	-3.64043e-10	-7.12131e-12	-1.08422e-10																0.00854	-3.64043e-10	3.03771e-11	-4.07274e-11
		0.00856	-3.64586e-10	-7.35995e-12	-1.08486e-10																0.00856	-3.64586e-10	3.00935e-11	-4.10513e-11
		0.00858	-3.65118e-10	-7.59531e-12	-1.0855e-10																0.00858	-3.65118e-10	2.98131e-11	-4.13733e-11
		0.0086	-3.65639e-10	-7.82739e-12	-1.08613e-10																0.0086	-3.65639e-10	2.95356e-11	-4.16936e-11
		0.00862	-3.66149e-10	-8.05622e-12	-1.08676e-10																0.00862	-3.66149e-10	2.9261e-11	-4.20122e-11
		0.00864	-3.66649e-10	-8.28189e-12	-1.08739e-10																0.00864	-3.66649e-10	2.89892e-11	-4.2329e-11
		0.00866	-3.67138e-10	-8.50448e-12	-1.08801e-10																0.00866	-3.67138e-10	2.87201e-11	-4.26438e-11
		0.00868	-3.67619e-10	-8.72414e-12	-1.08863e-10																0.00868	-3.67619e-10	2.84535e-11	-4.29565e-11
		0.0087	-3.6809e-10	-8.941e-12	-1.08924e-10																0.0087	-3.6809e-10	2.81891e-11	-4.32672e-11
		0.00872	-3.68552e-10	-9.15525e-12	-1.08985e-10																0.00872	-3.68552e-10	2.79268e-11	-4.35756e-11
		0.00874	-3.69006e-10	-9.36703e-12	-1.09046e-10																0.00874	-3.69006e-10	2.7666e-11	-4.38816e-11
		0.00876	-3.69453e-10	-9.57644e-12	-1.09106e-10																0.00876	-3.69453e-10	2.74063e-11	-4.41851e-11
		0.00878	-3.69892e-10	-9.78356e-12	-1.09166e-10																0.00878	-3.69892e-10	2.71475e-11	-4.4486e-11
		0.0088	-3.70324e-10	-9.98834e-12	-1.09226e-10																0.0088	-3.70324e-10	2.68889e-11	-4.47841e-11
		0.00882	-3.70749e-10	-1.01907e-11	-1.09287e-10																0.00882	-3.70749e-10	2.66303e-11	-4.50794e-11
		0.00884	-3.71167e-10	-1.03905e-11	-1.09347e-10																0.00884	-3.71167e-10	2.63715e-11	-4.53715e-11
		0.00886	-3.71579e-10	-1.05876e-11	-1.09407e-10																0.00886	-3.71579e-10	2.61121e-11	-4.56603e-11
		0.00888	-3.71983e-10	-1.07818e-11	-1.09468e-10																0.00888	-3.71983e-10	2.5852e-11	-4.59456e-11
		0.0089	-3.72381e-10	-1.09728e-11	-1.09528e-10																0.0089	-3.72381e-10	2.55913e-11	-4.62272e-11
		0.00892	-3.72773e-10	-1.11605e-11	-1.09589e-10																0.00892	-3.72773e-10	2.53299e-11	-4.65048e-11
		0.00894	-3.73157e-10	-1.13449e-11	-1.09651e-10																0.00894	-3.73157e-10	2.5068e-11	-4.67784e-11
		0.00896	-3.73535e-10	-1.15261e-11	-1.09712e-10																0.00896	-3.73535e-10	2.48056e-11	-4.70478e-11
		0.00898	-3.73906e-10	-1.1704e-11	-1.09774e-10																0.00898	-3.73906e-10	2.45429e-11	-4.73128e-11
		0.009	-3.74271e-10	-1.18788e-11	-1.09835e-10																0.009	-3.74271e-10	2.428e-11	-4.75735e-11
		0.00902	-3.74629e-10	-1.20508e-11	-1.09896e-10																0.00902	-3.74629e-10	2.4017e-11	-4.78298e-11
		0.00904	-3.74982e-10	-1.22201e-11	-1.09957e-10																0.00904	-3.74982e-10	2.37539e-11	-4.80817e-11
		0.00906	-3.75329e-10	-1.23868e-11	-1.10018e-10																0.00906	-3.75329e-10	2.34907e-11	-4.83292e-11
		0.00908	-3.7567e-10	-1.25512e-11	-1.10078e-10																0.00908	-3.7567e-10	2.32275e-11	-4.85726e-11
		0.0091	-3.76007e-10	-1.27133e-11	-1.10138e-10																0.0091	-3.76007e-10	2.29644e-11	-4.88117e-11
		0.00912	-3.76339e-10	-1.28731e-11	-1.10197e-10																0.00912	-3.76339e-10	2.27014e-11	-4.90466e-11
		0.00914	-3.76668e-10	-1.30308e-11	-1.10255e-10																0.00914	-3.76668e-10	2.24387e-11	-4.92776e-11
		0.00916	-3.76991e-10	-1.31864e-11	-1.10313e-10																0.00916	-3.76991e-10	2.21764e-11	-4.95045e-11
		0.00918	-3.77311e-10	-1.33399e-11	-1.10371e-10																0.00918	-3.77311e-10	2.19146e-11	-4.97277e-11
		0.0092	-3.77628e-10	-1.34915e-11	-1.10428e-10																0.0092	-3.77628e-10	2.16534e-11	-4.99472e-11
		0.00922	-3.7794e-10	-1.36413e-11	-1.10484e-10																0.00922	-3.7794e-10	2.13931e-11	-5.01631e-11
		0.00924	-3.78249e-10	-1.37894e-11	-1.1054e-10																0.00924	-3.78249e-10	2.11336e-11	-5.03757e-11
		0.00926	-3.78554e-10	-1.3936e-11	-1.10595e-10																0.00926	-3.78554e-10	2.08753e-11	-5.0585e-11
		0.00928	-3.78856e-10	-1.40811e-11	-1.1065e-10																0.00928	-3.78856e-10	2.06182e-11	-5.07912e-11
		0.0093	-3.79155e-10	-1.42249e-11	-1.10704e-10																0.0093	-3.79155e-10	2.03627e-11	-5.09948e-11
		0.00932	-3.79451e-10	-1.43676e-11	-1.10758e-10																0.00932	-3.79451e-10	2.01091e-11	-5.11958e-11
		0.00934	-3.79744e-10	-1.45092e-11	-1.10812e-10																0.00934	-3.79744e-10	1.98575e-11	-5.13948e-11
		0.00936	-3.80035e-10	-1.46498e-11	-1.10865e-10																0.00936	-3.80035e-10	1.96083e-11	-5.15919e-11
		0.00938	-3.80323e-10	-1.47895e-11	-1.10917e-10																0.00938	-3.80323e-10	1.93616e-11	-5.17875e-11
		0.0094	-3.8061e-10	-1.49284e-11	-1.10969e-10																0.0094	-3.8061e-10	1.91177e-11	-5.19815e-11
		0.00942	-3.80895e-10	-1.50665e-11	-1.11021e-10																0.00942	-3.80895e-10	1.88769e-11	-5.21742e-11
		0.00944	-3.81179e-10	-1.5204e-11	-1.11072e-10																0.00944	-3.81179e-10	1.86392e-11	-5.23656e-11
		0.00946	-3.81462e-10	-1.53409e-11	-1.11122e-10																0.00946	-3.81462e-10	1.84048e-11	-5.25558e-11
		0.00948	-3.81743e-10	-1.54774e-11	-1.11171e-10																0.00948	-3.81743e-10	1.81741e-11	-5.27451e-11
		0.0095	-3.82024e-10	-1.56137e-11	-1.1122e-10																0.0095	-3.82024e-10	1.79471e-11	-5.29336e-11
		0.00952	-3.82305e-10	-1.57498e-11	-1.11268e-10																0.00952	-3.82305e-10	1.7724e-11	-5.31215e-11
		0.00954	-3.82584e-10	-1.5886e-11	-1.11316e-10																0.00954	-3.82584e-10	1.75052e-11	-5.33091e-11
		0.00956	-3.82864e-10	-1.60225e-11	-1.11364e-10																0.00956	-3.82864e-10	1.72909e-11	-5.34965e-11
		0.00958	-3.83143e-10	-1.61593e-11	-1.11412e-10																0.00958	-3.83143e-10	1.70811e-11	-5.36839e-11
		0.0096	-3.83422e-10	-1.62965e-11	-1.11459e-10																0.0096	-3.83422e-10	1.68759e-11	-5.38713e-11
		0.00962	-3.83701e-10	-1.64342e-11	-1.11506e-10																0.00962	-3.83701e-10	1.66755e-11	-5.40587e-11
		0.00964	-3.83979e-10	-1.65723e-11	-1.11553e-10																0.00964	-3.83979e-10	1.64799e-11	-5.42461e-11
		0.00966	-3.84256e-10	-1.6711e-11	-1.11599e-10																0.00966	-3.84256e-10	1.62892e-11	-5.44338e-11
		0.00968	-3.84532e-10	-1.68502e-11	-1.11645e-10																0.00968	-3.84532e-10	1.61035e-11	-5.46216e-11
		0.0097	-3.84806e-10	-1.69899e-11	-1.1169e-10																0.0097	-3.84806e-10	1.59228e-11	-5.48098e-11
		0.00972	-3.85079e-10	-1.713e-11	-1.11735e-10																0.00972	-3.85079e-10	1.5747e-11	-5.49983e-11
		0.00974	-3.8535e-10	-1.72705e-11	-1.11779e-10																0.00974	-3.8535e-10	1.55759e-11	-5.51873e-11
		0.00976	-3.85618e-10	-1.74112e-11	-1.11822e-10																0.00976	-3.85618e-10	1.54093e-11	-5.53768e-11
		0.00978	-3.85885e-10	-1.75522e-11	-1.11866e-10																0.00978	-3.85885e-10	1.52468e-11	-5.55666e-11
		0.0098	-3.8615e-10	-1.76933e-11	-1.11908e-10																0.0098	-3.8615e-10	1.50883e-11	-5.57566e-11
		0.00982	-3.86413e-10	-1.78344e-11	-1.1195e-10																0.00982	-3.86413e-10	1.49333e-11	-5.59467e-11
		0.00984	-3.86673e-10	-1.79754e-11	-1.11991e-10																0.00984	-3.86673e-10	1.47817e-11	-5.61367e-11
		0.00986	-3.86932e-10	-1.81166e-11	-1.12032e-10																0.00986	-3.86932e-10	1.46331e-11	-5.63264e-11
		0.00988	-3.87189e-10	-1.82579e-11	-1.12071e-10																0.00988	-3.87189e-10	1.44875e-11	-5.65157e-11
		0.0099	-3.87444e-10	-1.83993e-11	-1.12109e-10																0.0099	-3.87444e-10	1.43447e-11	-5.67044e-11
		0.00992	-3.87697e-10	-1.8541e-11	-1.12146e-10																0.00992	-3.87697e-10	1.42047e-11	-5.68924e-11
		0.00994	-3.87948e-10	-1.86829e-11	-1.12182e-10																0.00994	-3.87948e-10	1.40673e-11	-5.70794e-11
		0.00996	-3.88196e-10	-1.8825e-11	-1.12216e-10																0.00996	-3.88196e-10	1.39325e-11	-5.72654e-11
		0.00998	-3.88442e-10	-1.89674e-11	-1.12249e-10																0.00998	-3.88442e-10	1.38004e-11	-5.74501e-11
		0.01	-3.88685e-10	-1.911e-11	-1.12282e-10																0.01	-3.88685e-10	1.36711e-11	-5.76335e-11
		0.01002	-3.88925e-10	-1.92528e-11	-1.12313e-10																0.01002	-3.88925e-10	1.35444e-11	-5.78153e-11
		0.01004	-3.89162e-10	-1.93957e-11	-1.12344e-10																0.01004	-3.89162e-10	1.34206e-11	-5.79954e-11
		0.01006	-3.89395e-10	-1.95386e-11	-1.12374e-10																0.01006	-3.89395e-10	1.32997e-11	-5.81739e-11
		0.01008	-3.89625e-10	-1.96814e-11	-1.12404e-10																0.01008	-3.89625e-10	1.31816e-11	-5.83506e-11
		0.0101	-3.89853e-10	-1.98239e-11	-1.12433e-10																0.0101	-3.89853e-10	1.30664e-11	-5.85256e-11
		0.01012	-3.90076e-10	-1.9966e-11	-1.12463e-10																0.01012	-3.90076e-10	1.29538e-11	-5.86988e-11
		0.01014	-3.90296e-10	-2.01076e-11	-1.12492e-10																0.01014	-3.90296e-10	1.28438e-11	-5.88703e-11
		0.01016	-3.90513e-10	-2.02487e-11	-1.12521e-10																0.01016	-3.90513e-10	1.27361e-11	-5.90401e-11
		0.01018	-3.90726e-10	-2.03892e-11	-1.12551e-10																0.01018	-3.90726e-10	1.26306e-11	-5.92079e-11
		0.0102	-3.90936e-10	-2.05291e-11	-1.1258e-10																0.0102	-3.90936e-10	1.25268e-11	-5.93739e-11
		0.01022	-3.91141e-10	-2.06684e-11	-1.1261e-10																0.01022	-3.91141e-10	1.24247e-11	-5.9538e-11
		0.01024	-3.91342e-10	-2.08071e-11	-1.1264e-10																0.01024	-3.91342e-10	1.23238e-11	-5.97e-11
		0.01026	-3.91539e-10	-2.09452e-11	-1.1267e-10																0.01026	-3.91539e-10	1.2224e-11	-5.98597e-11
		0.01028	-3.91731e-10	-2.10826e-11	-1.127e-10																0.01028	-3.91731e-10	1.21251e-11	-6.0017e-11
		0.0103	-3.91918e-10	-2.12192e-11	-1.12731e-10																0.0103	-3.91918e-10	1.20268e-11	-6.01717e-11
		0.01032	-3.921e-10	-2.13548e-11	-1.12762e-10																0.01032	-3.921e-10	1.19292e-11	-6.03238e-11
		0.01034	-3.92276e-10	-2.14893e-11	-1.12793e-10																0.01034	-3.92276e-10	1.1832e-11	-6.04731e-11
		0.01036	-3.92448e-10	-2.16224e-11	-1.12824e-10																0.01036	-3.92448e-10	1.17352e-11	-6.06197e-11
		0.01038	-3.92614e-10	-2.1754e-11	-1.12856e-10																0.01038	-3.92614e-10	1.16389e-11	-6.07634e-11
		0.0104	-3.92775e-10	-2.18839e-11	-1.12888e-10																0.0104	-3.92775e-10	1.1543e-11	-6.09045e-11
		0.01042	-3.92931e-10	-2.20119e-11	-1.1292e-10																0.01042	-3.92931e-10	1.14477e-11	-6.1043e-11
		0.01044	-3.93081e-10	-2.21379e-11	-1.12953e-10																0.01044	-3.93081e-10	1.13531e-11	-6.1179e-11
		0.01046	-3.93227e-10	-2.22619e-11	-1.12986e-10																0.01046	-3.93227e-10	1.12592e-11	-6.13125e-11
		0.01048	-3.93367e-10	-2.23837e-11	-1.1302e-10																0.01048	-3.93367e-10	1.11663e-11	-6.14436e-11
		0.0105	-3.93503e-10	-2.25036e-11	-1.13055e-10																0.0105	-3.93503e-10	1.10745e-11	-6.15721e-11
		0.01052	-3.93633e-10	-2.26217e-11	-1.1309e-10																0.01052	-3.93633e-10	1.09842e-11	-6.16978e-11
		0.01054	-3.9376e-10	-2.27382e-11	-1.13127e-10																0.01054	-3.9376e-10	1.08956e-11	-6.18207e-11
		0.01056	-3.93882e-10	-2.28533e-11	-1.13164e-10																0.01056	-3.93882e-10	1.08088e-11	-6.19405e-11
		0.01058	-3.94e-10	-2.29673e-11	-1.13202e-10																0.01058	-3.94e-10	1.07242e-11	-6.20571e-11
		0.0106	-3.94115e-10	-2.30802e-11	-1.13241e-10																0.0106	-3.94115e-10	1.06417e-11	-6.21704e-11
		0.01062	-3.94227e-10	-2.31922e-11	-1.13281e-10																0.01062	-3.94227e-10	1.05615e-11	-6.22804e-11
		0.01064	-3.94336e-10	-2.33033e-11	-1.13322e-10																0.01064	-3.94336e-10	1.04836e-11	-6.23871e-11
		0.01066	-3.94442e-10	-2.34136e-11	-1.13363e-10																0.01066	-3.94442e-10	1.04081e-11	-6.24907e-11
		0.01068	-3.94546e-10	-2.35229e-11	-1.13406e-10																0.01068	-3.94546e-10	1.0335e-11	-6.25914e-11
		0.0107	-3.94646e-10	-2.36311e-11	-1.13449e-10																0.0107	-3.94646e-10	1.02644e-11	-6.26892e-11
		0.01072	-3.94744e-10	-2.3738e-11	-1.13492e-10																0.01072	-3.94744e-10	1.01964e-11	-6.27846e-11
		0.01074	-3.94838e-10	-2.38433e-11	-1.13536e-10																0.01074	-3.94838e-10	1.01312e-11	-6.28774e-11
		0.01076	-3.94929e-10	-2.39468e-11	-1.13581e-10																0.01076	-3.94929e-10	1.00688e-11	-6.29682e-11
		0.01078	-3.95018e-10	-2.40484e-11	-1.13626e-10																0.01078	-3.95018e-10	1.00091e-11	-6.3057e-11
		0.0108	-3.95103e-10	-2.41477e-11	-1.13671e-10																0.0108	-3.95103e-10	9.95209e-12	-6.31441e-11
		0.01082	-3.95184e-10	-2.42449e-11	-1.13717e-10																0.01082	-3.95184e-10	9.89778e-12	-6.32298e-11
		0.01084	-3.95263e-10	-2.43398e-11	-1.13762e-10																0.01084	-3.95263e-10	9.8461e-12	-6.33145e-11
		0.01086	-3.95338e-10	-2.44324e-11	-1.13807e-10																0.01086	-3.95338e-10	9.79704e-12	-6.33985e-11
		0.01088	-3.95411e-10	-2.45229e-11	-1.13851e-10																0.01088	-3.95411e-10	9.75056e-12	-6.34821e-11
		0.0109	-3.95481e-10	-2.46113e-11	-1.13896e-10																0.0109	-3.95481e-10	9.70658e-12	-6.35657e-11
		0.01092	-3.95549e-10	-2.46975e-11	-1.13939e-10																0.01092	-3.95549e-10	9.66501e-12	-6.36495e-11
		0.01094	-3.95615e-10	-2.47816e-11	-1.13982e-10																0.01094	-3.95615e-10	9.62564e-12	-6.37336e-11
		0.01096	-3.9568e-10	-2.48633e-11	-1.14025e-10																0.01096	-3.9568e-10	9.58825e-12	-6.38183e-11
		0.01098	-3.95743e-10	-2.49426e-11	-1.14066e-10																0.01098	-3.95743e-10	9.55254e-12	-6.39036e-11
		0.011	-3.95805e-10	-2.50193e-11	-1.14108e-10																0.011	-3.95805e-10	9.51823e-12	-6.39896e-11
		0.01102	-3.95866e-10	-2.50932e-11	-1.14148e-10																0.01102	-3.95866e-10	9.48505e-12	-6.40763e-11
		0.01104	-3.95926e-10	-2.51642e-11	-1.14188e-10																0.01104	-3.95926e-10	9.45274e-12	-6.41638e-11
		0.01106	-3.95985e-10	-2.52324e-11	-1.14227e-10																0.01106	-3.95985e-10	9.42104e-12	-6.42522e-11
		0.01108	-3.96043e-10	-2.52976e-11	-1.14266e-10																0.01108	-3.96043e-10	9.38962e-12	-6.43417e-11
		0.0111	-3.961e-10	-2.53601e-11	-1.14304e-10																0.0111	-3.961e-10	9.35814e-12	-6.44323e-11
		0.01112	-3.96155e-10	-2.54198e-11	-1.14341e-10																0.01112	-3.96155e-10	9.32623e-12	-6.45243e-11
		0.01114	-3.96209e-10	-2.54769e-11	-1.14377e-10																0.01114	-3.96209e-10	9.29353e-12	-6.46178e-11
		0.01116	-3.96262e-10	-2.55314e-11	-1.14412e-10																0.01116	-3.96262e-10	9.25962e-12	-6.47128e-11
		0.01118	-3.96314e-10	-2.55836e-11	-1.14446e-10																0.01118	-3.96314e-10	9.22409e-12	-6.48096e-11
		0.0112	-3.96365e-10	-2.56335e-11	-1.14479e-10																0.0112	-3.96365e-10	9.18654e-12	-6.49082e-11
		0.01122	-3.96415e-10	-2.56814e-11	-1.14511e-10																0.01122	-3.96415e-10	9.14661e-12	-6.50088e-11
		0.01124	-3.96465e-10	-2.57275e-11	-1.14542e-10																0.01124	-3.96465e-10	9.10392e-12	-6.51115e-11
		0.01126	-3.96515e-10	-2.57718e-11	-1.14572e-10																0.01126	-3.96515e-10	9.05813e-12	-6.5216e-11
		0.01128	-3.96566e-10	-2.58146e-11	-1.14601e-10																0.01128	-3.96566e-10	9.00897e-12	-6.53224e-11
		0.0113	-3.96616e-10	-2.5856e-11	-1.14629e-10																0.0113	-3.96616e-10	8.95613e-12	-6.54306e-11
		0.01132	-3.96666e-10	-2.58961e-11	-1.14655e-10																0.01132	-3.96666e-10	8.8993e-12	-6.55401e-11
		0.01134	-3.96717e-10	-2.59351e-11	-1.14682e-10																0.01134	-3.96717e-10	8.83823e-12	-6.56508e-11
		0.01136	-3.96769e-10	-2.59731e-11	-1.14707e-10																0.01136	-3.96769e-10	8.77261e-12	-6.57624e-11
		0.01138	-3.9682e-10	-2.60101e-11	-1.14732e-10																0.01138	-3.9682e-10	8.70216e-12	-6.5875e-11
		0.0114	-3.96872e-10	-2.60464e-11	-1.14756e-10																0.0114	-3.96872e-10	8.6266e-12	-6.59881e-11
		0.01142	-3.96923e-10	-2.60819e-11	-1.1478e-10																0.01142	-3.96923e-10	8.54564e-12	-6.6102e-11
		0.01144	-3.96975e-10	-2.61169e-11	-1.14804e-10																0.01144	-3.96975e-10	8.45902e-12	-6.62164e-11
		0.01146	-3.97026e-10	-2.61515e-11	-1.14827e-10																0.01146	-3.97026e-10	8.36652e-12	-6.63315e-11
		0.01148	-3.97077e-10	-2.6186e-11	-1.14851e-10																0.01148	-3.97077e-10	8.26799e-12	-6.64471e-11
		0.0115	-3.97128e-10	-2.62203e-11	-1.14874e-10																0.0115	-3.97128e-10	8.16331e-12	-6.65629e-11
		0.01152	-3.97179e-10	-2.62547e-11	-1.14897e-10																0.01152	-3.97179e-10	8.05245e-12	-6.66788e-11
		0.01154	-3.9723e-10	-2.62891e-11	-1.1492e-10																0.01154	-3.9723e-10	7.93544e-12	-6.67946e-11
		0.01156	-3.9728e-10	-2.63236e-11	-1.14943e-10																0.01156	-3.9728e-10	7.81246e-12	-6.691e-11
		0.01158	-3.97331e-10	-2.63582e-11	-1.14965e-10																0.01158	-3.97331e-10	7.68381e-12	-6.70249e-11
		0.0116	-3.97383e-10	-2.63929e-11	-1.14988e-10																0.0116	-3.97383e-10	7.54994e-12	-6.71391e-11
		0.01162	-3.97435e-10	-2.64278e-11	-1.1501e-10																0.01162	-3.97435e-10	7.41131e-12	-6.72528e-11
		0.01164	-3.97489e-10	-2.64629e-11	-1.15033e-10																0.01164	-3.97489e-10	7.26844e-12	-6.73655e-11
		0.01166	-3.97545e-10	-2.64983e-11	-1.15056e-10																0.01166	-3.97545e-10	7.12184e-12	-6.74775e-11
		0.01168	-3.97603e-10	-2.6534e-11	-1.1508e-10																0.01168	-3.97603e-10	6.97198e-12	-6.75885e-11
		0.0117	-3.97664e-10	-2.657e-11	-1.15104e-10																0.0117	-3.97664e-10	6.8193e-12	-6.76987e-11
		0.01172	-3.97728e-10	-2.66063e-11	-1.15128e-10																0.01172	-3.97728e-10	6.66426e-12	-6.7808e-11
		0.01174	-3.97795e-10	-2.66429e-11	-1.15153e-10																0.01174	-3.97795e-10	6.5074e-12	-6.79165e-11
		0.01176	-3.97866e-10	-2.66801e-11	-1.15179e-10																0.01176	-3.97866e-10	6.34934e-12	-6.80242e-11
		0.01178	-3.97939e-10	-2.67178e-11	-1.15206e-10																0.01178	-3.97939e-10	6.19073e-12	-6.81311e-11
		0.0118	-3.98017e-10	-2.67561e-11	-1.15233e-10																0.0118	-3.98017e-10	6.03229e-12	-6.82375e-11
		0.01182	-3.98098e-10	-2.67954e-11	-1.15261e-10																0.01182	-3.98098e-10	5.87469e-12	-6.83436e-11
		0.01184	-3.98183e-10	-2.68355e-11	-1.1529e-10																0.01184	-3.98183e-10	5.71862e-12	-6.84496e-11
		0.01186	-3.98271e-10	-2.68767e-11	-1.15321e-10																0.01186	-3.98271e-10	5.56476e-12	-6.85557e-11
		0.01188	-3.98363e-10	-2.69189e-11	-1.15352e-10																0.01188	-3.98363e-10	5.41374e-12	-6.8662e-11
		0.0119	-3.98459e-10	-2.69622e-11	-1.15385e-10																0.0119	-3.98459e-10	5.26622e-12	-6.87687e-11
		0.01192	-3.98558e-10	-2.70066e-11	-1.15419e-10																0.01192	-3.98558e-10	5.12281e-12	-6.88757e-11
		0.01194	-3.9866e-10	-2.70521e-11	-1.15455e-10																0.01194	-3.9866e-10	4.98408e-12	-6.89831e-11
		0.01196	-3.98765e-10	-2.70986e-11	-1.15492e-10																0.01196	-3.98765e-10	4.85057e-12	-6.90909e-11
		0.01198	-3.98873e-10	-2.7146e-11	-1.1553e-10																0.01198	-3.98873e-10	4.72282e-12	-6.9199e-11
		0.012	-3.98984e-10	-2.71944e-11	-1.1557e-10																0.012	-3.98984e-10	4.60131e-12	-6.93076e-11
		0.01202	-3.99097e-10	-2.72436e-11	-1.1561e-10																0.01202	-3.99097e-10	4.48645e-12	-6.94165e-11
		0.01204	-3.99213e-10	-2.72937e-11	-1.15652e-10																0.01204	-3.99213e-10	4.37852e-12	-6.95259e-11
		0.01206	-3.9933e-10	-2.73446e-11	-1.15695e-10																0.01206	-3.9933e-10	4.27774e-12	-6.96358e-11
		0.01208	-3.9945e-10	-2.73965e-11	-1.15739e-10																0.01208	-3.9945e-10	4.18427e-12	-6.97461e-11
		0.0121	-3.99572e-10	-2.74492e-11	-1.15783e-10																0.0121	-3.99572e-10	4.09818e-12	-6.98569e-11
		0.01212	-3.99695e-10	-2.75029e-11	-1.15828e-10																0.01212	-3.99695e-10	4.01956e-12	-6.99679e-11
		0.01214	-3.9982e-10	-2.75573e-11	-1.15874e-10																0.01214	-3.9982e-10	3.94844e-12	-7.00793e-11
		0.01216	-3.99947e-10	-2.76124e-11	-1.1592e-10																0.01216	-3.99947e-10	3.88493e-12	-7.01908e-11
		0.01218	-4.00075e-10	-2.7668e-11	-1.15967e-10																0.01218	-4.00075e-10	3.82909e-12	-7.03026e-11
		0.0122	-4.00204e-10	-2.7724e-11	-1.16013e-10																0.0122	-4.00204e-10	3.78097e-12	-7.04146e-11
		0.01222	-4.00333e-10	-2.77804e-11	-1.1606e-10																0.01222	-4.00333e-10	3.74063e-12	-7.0527e-11
		0.01224	-4.00463e-10	-2.78371e-11	-1.16106e-10																0.01224	-4.00463e-10	3.70809e-12	-7.06397e-11
		0.01226	-4.00593e-10	-2.78942e-11	-1.16153e-10																0.01226	-4.00593e-10	3.68335e-12	-7.07528e-11
		0.01228	-4.00722e-10	-2.79516e-11	-1.162e-10																0.01228	-4.00722e-10	3.66636e-12	-7.08664e-11
		0.0123	-4.00851e-10	-2.80095e-11	-1.16247e-10																0.0123	-4.00851e-10	3.65703e-12	-7.09805e-11
		0.01232	-4.00979e-10	-2.8068e-11	-1.16294e-10																0.01232	-4.00979e-10	3.65521e-12	-7.10949e-11
		0.01234	-4.01106e-10	-2.81272e-11	-1.16341e-10																0.01234	-4.01106e-10	3.66075e-12	-7.12096e-11
		0.01236	-4.01232e-10	-2.8187e-11	-1.16388e-10																0.01236	-4.01232e-10	3.67348e-12	-7.13244e-11
		0.01238	-4.01356e-10	-2.82474e-11	-1.16435e-10																0.01238	-4.01356e-10	3.69318e-12	-7.14391e-11
		0.0124	-4.01478e-10	-2.83086e-11	-1.16482e-10																0.0124	-4.01478e-10	3.71961e-12	-7.15536e-11
		0.01242	-4.01599e-10	-2.83703e-11	-1.16529e-10																0.01242	-4.01599e-10	3.75247e-12	-7.16679e-11
		0.01244	-4.01716e-10	-2.84326e-11	-1.16575e-10																0.01244	-4.01716e-10	3.79141e-12	-7.17818e-11
		0.01246	-4.01831e-10	-2.84952e-11	-1.16621e-10																0.01246	-4.01831e-10	3.83603e-12	-7.18952e-11
		0.01248	-4.01943e-10	-2.85581e-11	-1.16667e-10																0.01248	-4.01943e-10	3.8859e-12	-7.2008e-11
		0.0125	-4.02052e-10	-2.8621e-11	-1.16712e-10																0.0125	-4.02052e-10	3.94052e-12	-7.212e-11
		0.01252	-4.02157e-10	-2.86837e-11	-1.16757e-10																0.01252	-4.02157e-10	3.99944e-12	-7.2231e-11
		0.01254	-4.02257e-10	-2.8746e-11	-1.16801e-10																0.01254	-4.02257e-10	4.06221e-12	-7.23409e-11
		0.01256	-4.02353e-10	-2.88076e-11	-1.16845e-10																0.01256	-4.02353e-10	4.1284e-12	-7.24496e-11
		0.01258	-4.02443e-10	-2.88683e-11	-1.16888e-10																0.01258	-4.02443e-10	4.19763e-12	-7.25569e-11
		0.0126	-4.02529e-10	-2.89278e-11	-1.16931e-10																0.0126	-4.02529e-10	4.26961e-12	-7.26628e-11
		0.01262	-4.02609e-10	-2.89861e-11	-1.16973e-10																0.01262	-4.02609e-10	4.34406e-12	-7.27671e-11
		0.01264	-4.02683e-10	-2.90431e-11	-1.17015e-10																0.01264	-4.02683e-10	4.42071e-12	-7.28697e-11
		0.01266	-4.02751e-10	-2.90986e-11	-1.17056e-10																0.01266	-4.02751e-10	4.49928e-12	-7.29703e-11
		0.01268	-4.02814e-10	-2.91528e-11	-1.17097e-10																0.01268	-4.02814e-10	4.57947e-12	-7.30689e-11
		0.0127	-4.02871e-10	-2.92058e-11	-1.17137e-10																0.0127	-4.02871e-10	4.66105e-12	-7.31652e-11
		0.01272	-4.02923e-10	-2.92575e-11	-1.17176e-10																0.01272	-4.02923e-10	4.74379e-12	-7.32592e-11
		0.01274	-4.0297e-10	-2.93081e-11	-1.17215e-10																0.01274	-4.0297e-10	4.82753e-12	-7.33507e-11
		0.01276	-4.03012e-10	-2.93577e-11	-1.17253e-10																0.01276	-4.03012e-10	4.91215e-12	-7.34396e-11
		0.01278	-4.0305e-10	-2.94061e-11	-1.1729e-10																0.01278	-4.0305e-10	4.99755e-12	-7.35257e-11
		0.0128	-4.03083e-10	-2.94536e-11	-1.17327e-10																0.0128	-4.03083e-10	5.08362e-12	-7.3609e-11
		0.01282	-4.03112e-10	-2.94999e-11	-1.17363e-10																0.01282	-4.03112e-10	5.1702e-12	-7.36892e-11
		0.01284	-4.03136e-10	-2.95448e-11	-1.17399e-10																0.01284	-4.03136e-10	5.25711e-12	-7.37662e-11
		0.01286	-4.03158e-10	-2.95882e-11	-1.17435e-10																0.01286	-4.03158e-10	5.34413e-12	-7.38398e-11
		0.01288	-4.03176e-10	-2.96298e-11	-1.1747e-10																0.01288	-4.03176e-10	5.43105e-12	-7.39099e-11
		0.0129	-4.0319e-10	-2.96694e-11	-1.17505e-10																0.0129	-4.0319e-10	5.51766e-12	-7.39766e-11
		0.01292	-4.03201e-10	-2.9707e-11	-1.1754e-10																0.01292	-4.03201e-10	5.60375e-12	-7.40399e-11
		0.01294	-4.03209e-10	-2.97426e-11	-1.17575e-10																0.01294	-4.03209e-10	5.68911e-12	-7.41e-11
		0.01296	-4.03212e-10	-2.97765e-11	-1.1761e-10																0.01296	-4.03212e-10	5.77359e-12	-7.41571e-11
		0.01298	-4.03212e-10	-2.98088e-11	-1.17644e-10																0.01298	-4.03212e-10	5.8571e-12	-7.42116e-11
		0.013	-4.03208e-10	-2.98398e-11	-1.17679e-10																0.013	-4.03208e-10	5.93959e-12	-7.42636e-11
		0.01302	-4.032e-10	-2.98697e-11	-1.17714e-10																0.01302	-4.032e-10	6.02105e-12	-7.43135e-11
		0.01304	-4.03189e-10	-2.98986e-11	-1.17749e-10																0.01304	-4.03189e-10	6.10147e-12	-7.43613e-11
		0.01306	-4.03175e-10	-2.99268e-11	-1.17784e-10																0.01306	-4.03175e-10	6.18089e-12	-7.44073e-11
		0.01308	-4.03158e-10	-2.99542e-11	-1.17819e-10																0.01308	-4.03158e-10	6.25933e-12	-7.44515e-11
		0.0131	-4.03139e-10	-2.9981e-11	-1.17854e-10																0.0131	-4.03139e-10	6.33681e-12	-7.4494e-11
		0.01312	-4.03119e-10	-3.00073e-11	-1.17889e-10																0.01312	-4.03119e-10	6.41331e-12	-7.45349e-11
		0.01314	-4.03098e-10	-3.0033e-11	-1.17924e-10																0.01314	-4.03098e-10	6.48875e-12	-7.45741e-11
		0.01316	-4.03075e-10	-3.00583e-11	-1.17959e-10																0.01316	-4.03075e-10	6.56303e-12	-7.46117e-11
		0.01318	-4.03052e-10	-3.00831e-11	-1.17994e-10																0.01318	-4.03052e-10	6.63607e-12	-7.46476e-11
		0.0132	-4.03028e-10	-3.01073e-11	-1.18029e-10																0.0132	-4.03028e-10	6.70769e-12	-7.46819e-11
		0.01322	-4.03002e-10	-3.01309e-11	-1.18064e-10																0.01322	-4.03002e-10	6.77775e-12	-7.47146e-11
		0.01324	-4.02976e-10	-3.0154e-11	-1.18099e-10																0.01324	-4.02976e-10	6.84614e-12	-7.47456e-11
		0.01326	-4.0295e-10	-3.01764e-11	-1.18134e-10																0.01326	-4.0295e-10	6.9128e-12	-7.4775e-11
		0.01328	-4.02922e-10	-3.01984e-11	-1.18169e-10																0.01328	-4.02922e-10	6.97766e-12	-7.48029e-11
		0.0133	-4.02895e-10	-3.02198e-11	-1.18204e-10																0.0133	-4.02895e-10	7.0407e-12	-7.48293e-11
		0.01332	-4.02867e-10	-3.02409e-11	-1.1824e-10																0.01332	-4.02867e-10	7.10195e-12	-7.48544e-11
		0.01334	-4.0284e-10	-3.02615e-11	-1.18275e-10																0.01334	-4.0284e-10	7.16147e-12	-7.48782e-11
		0.01336	-4.02813e-10	-3.02816e-11	-1.18311e-10																0.01336	-4.02813e-10	7.2193e-12	-7.49007e-11
		0.01338	-4.02787e-10	-3.03013e-11	-1.18347e-10																0.01338	-4.02787e-10	7.27547e-12	-7.49222e-11
		0.0134	-4.02762e-10	-3.03206e-11	-1.18383e-10																0.0134	-4.02762e-10	7.33002e-12	-7.49425e-11
		0.01342	-4.02739e-10	-3.03396e-11	-1.1842e-10																0.01342	-4.02739e-10	7.38299e-12	-7.49616e-11
		0.01344	-4.02718e-10	-3.03584e-11	-1.18456e-10																0.01344	-4.02718e-10	7.43443e-12	-7.49796e-11
		0.01346	-4.02699e-10	-3.0377e-11	-1.18493e-10																0.01346	-4.02699e-10	7.48438e-12	-7.49966e-11
		0.01348	-4.02682e-10	-3.03955e-11	-1.1853e-10																0.01348	-4.02682e-10	7.53291e-12	-7.50126e-11
		0.0135	-4.02667e-10	-3.04138e-11	-1.18566e-10																0.0135	-4.02667e-10	7.58006e-12	-7.5028e-11
		0.01352	-4.02655e-10	-3.04321e-11	-1.18603e-10																0.01352	-4.02655e-10	7.62583e-12	-7.50428e-11
		0.01354	-4.02645e-10	-3.04504e-11	-1.1864e-10																0.01354	-4.02645e-10	7.67022e-12	-7.50575e-11
		0.01356	-4.02638e-10	-3.04685e-11	-1.18676e-10																0.01356	-4.02638e-10	7.71315e-12	-7.50723e-11
		0.01358	-4.02633e-10	-3.04867e-11	-1.18713e-10																0.01358	-4.02633e-10	7.75446e-12	-7.50875e-11
		0.0136	-4.0263e-10	-3.05048e-11	-1.18749e-10																0.0136	-4.0263e-10	7.79396e-12	-7.51033e-11
		0.01362	-4.0263e-10	-3.05229e-11	-1.18785e-10																0.01362	-4.0263e-10	7.83145e-12	-7.512e-11
		0.01364	-4.0263e-10	-3.0541e-11	-1.1882e-10																0.01364	-4.0263e-10	7.86676e-12	-7.51376e-11
		0.01366	-4.02633e-10	-3.05592e-11	-1.18854e-10																0.01366	-4.02633e-10	7.89978e-12	-7.51564e-11
		0.01368	-4.02636e-10	-3.05774e-11	-1.18887e-10																0.01368	-4.02636e-10	7.93051e-12	-7.51763e-11
		0.0137	-4.02642e-10	-3.05957e-11	-1.18919e-10																0.0137	-4.02642e-10	7.959e-12	-7.51972e-11
		0.01372	-4.02648e-10	-3.06142e-11	-1.18949e-10																0.01372	-4.02648e-10	7.9853e-12	-7.52191e-11
		0.01374	-4.02657e-10	-3.06329e-11	-1.18979e-10																0.01374	-4.02657e-10	8.0094e-12	-7.52419e-11
		0.01376	-4.02667e-10	-3.06519e-11	-1.19007e-10																0.01376	-4.02667e-10	8.03123e-12	-7.52655e-11
		0.01378	-4.02678e-10	-3.06712e-11	-1.19033e-10																0.01378	-4.02678e-10	8.0507e-12	-7.52899e-11
		0.0138	-4.02691e-10	-3.06909e-11	-1.19058e-10																0.0138	-4.02691e-10	8.06768e-12	-7.53148e-11
		0.01382	-4.02706e-10	-3.07109e-11	-1.19081e-10																0.01382	-4.02706e-10	8.08209e-12	-7.53403e-11
		0.01384	-4.02722e-10	-3.07314e-11	-1.19103e-10																0.01384	-4.02722e-10	8.09383e-12	-7.5366e-11
		0.01386	-4.02739e-10	-3.07522e-11	-1.19123e-10																0.01386	-4.02739e-10	8.10288e-12	-7.5392e-11
		0.01388	-4.02756e-10	-3.07734e-11	-1.19142e-10																0.01388	-4.02756e-10	8.10919e-12	-7.54181e-11
		0.0139	-4.02775e-10	-3.07949e-11	-1.19158e-10																0.0139	-4.02775e-10	8.11276e-12	-7.5444e-11
		0.01392	-4.02794e-10	-3.08167e-11	-1.19173e-10																0.01392	-4.02794e-10	8.11362e-12	-7.54698e-11
		0.01394	-4.02814e-10	-3.08387e-11	-1.19187e-10																0.01394	-4.02814e-10	8.11184e-12	-7.54953e-11
		0.01396	-4.02834e-10	-3.08608e-11	-1.19198e-10																0.01396	-4.02834e-10	8.10743e-12	-7.55205e-11
		0.01398	-4.02855e-10	-3.08832e-11	-1.19208e-10																0.01398	-4.02855e-10	8.10043e-12	-7.55456e-11
		0.014	-4.02876e-10	-3.09057e-11	-1.19216e-10																0.014	-4.02876e-10	8.09082e-12	-7.55704e-11
		0.01402	-4.02897e-10	-3.09283e-11	-1.19222e-10																0.01402	-4.02897e-10	8.07855e-12	-7.55951e-11
		0.01404	-4.02918e-10	-3.09512e-11	-1.19226e-10																0.01404	-4.02918e-10	8.06366e-12	-7.56197e-11
		0.01406	-4.02939e-10	-3.09742e-11	-1.1923e-10																0.01406	-4.02939e-10	8.04623e-12	-7.56443e-11
		0.01408	-4.0296e-10	-3.09976e-11	-1.19231e-10																0.01408	-4.0296e-10	8.02639e-12	-7.5669e-11
		0.0141	-4.0298e-10	-3.10212e-11	-1.19232e-10																0.0141	-4.0298e-10	8.00431e-12	-7.56939e-11
		0.01412	-4.03001e-10	-3.10453e-11	-1.19231e-10																0.01412	-4.03001e-10	7.98014e-12	-7.57191e-11
		0.01414	-4.0302e-10	-3.10698e-11	-1.19229e-10																0.01414	-4.0302e-10	7.95405e-12	-7.57448e-11
		0.01416	-4.0304e-10	-3.10949e-11	-1.19226e-10																0.01416	-4.0304e-10	7.92618e-12	-7.57708e-11
		0.01418	-4.03059e-10	-3.11207e-11	-1.19223e-10																0.01418	-4.03059e-10	7.89661e-12	-7.57973e-11
		0.0142	-4.03077e-10	-3.11472e-11	-1.19219e-10																0.0142	-4.03077e-10	7.86541e-12	-7.58242e-11
		0.01422	-4.03096e-10	-3.11746e-11	-1.19215e-10																0.01422	-4.03096e-10	7.83262e-12	-7.58515e-11
		0.01424	-4.03115e-10	-3.12027e-11	-1.19211e-10																0.01424	-4.03115e-10	7.79826e-12	-7.58793e-11
		0.01426	-4.03133e-10	-3.12315e-11	-1.19207e-10																0.01426	-4.03133e-10	7.76227e-12	-7.59073e-11
		0.01428	-4.03152e-10	-3.12609e-11	-1.19204e-10																0.01428	-4.03152e-10	7.72457e-12	-7.59356e-11
		0.0143	-4.03172e-10	-3.12906e-11	-1.19201e-10																0.0143	-4.03172e-10	7.6851e-12	-7.59642e-11
		0.01432	-4.03191e-10	-3.13204e-11	-1.19198e-10																0.01432	-4.03191e-10	7.64378e-12	-7.59931e-11
		0.01434	-4.0321e-10	-3.13503e-11	-1.19197e-10																0.01434	-4.0321e-10	7.6006e-12	-7.60222e-11
		0.01436	-4.0323e-10	-3.138e-11	-1.19196e-10																0.01436	-4.0323e-10	7.55555e-12	-7.60516e-11
		0.01438	-4.03249e-10	-3.14097e-11	-1.19197e-10																0.01438	-4.03249e-10	7.50861e-12	-7.60811e-11
		0.0144	-4.03268e-10	-3.14391e-11	-1.19199e-10																0.0144	-4.03268e-10	7.45972e-12	-7.61108e-11
		0.01442	-4.03287e-10	-3.14685e-11	-1.19202e-10																0.01442	-4.03287e-10	7.40882e-12	-7.61406e-11
		0.01444	-4.03305e-10	-3.14977e-11	-1.19208e-10																0.01444	-4.03305e-10	7.35582e-12	-7.61705e-11
		0.01446	-4.03322e-10	-3.1527e-11	-1.19215e-10																0.01446	-4.03322e-10	7.30066e-12	-7.62005e-11
		0.01448	-4.03338e-10	-3.15561e-11	-1.19224e-10																0.01448	-4.03338e-10	7.24329e-12	-7.62309e-11
		0.0145	-4.03354e-10	-3.15852e-11	-1.19235e-10																0.0145	-4.03354e-10	7.18368e-12	-7.62618e-11
		0.01452	-4.03369e-10	-3.16141e-11	-1.19247e-10																0.01452	-4.03369e-10	7.12184e-12	-7.62933e-11
		0.01454	-4.03383e-10	-3.16427e-11	-1.19261e-10																0.01454	-4.03383e-10	7.0578e-12	-7.63257e-11
		0.01456	-4.03397e-10	-3.16709e-11	-1.19277e-10																0.01456	-4.03397e-10	6.99162e-12	-7.63592e-11
		0.01458	-4.0341e-10	-3.16987e-11	-1.19295e-10																0.01458	-4.0341e-10	6.92332e-12	-7.63939e-11
		0.0146	-4.03423e-10	-3.1726e-11	-1.19314e-10																0.0146	-4.03423e-10	6.85294e-12	-7.643e-11
		0.01462	-4.03436e-10	-3.17525e-11	-1.19334e-10																0.01462	-4.03436e-10	6.78047e-12	-7.64676e-11
		0.01464	-4.03448e-10	-3.17781e-11	-1.19356e-10																0.01464	-4.03448e-10	6.70592e-12	-7.65066e-11
		0.01466	-4.0346e-10	-3.18027e-11	-1.1938e-10																0.01466	-4.0346e-10	6.62927e-12	-7.65472e-11
		0.01468	-4.03471e-10	-3.18259e-11	-1.19405e-10																0.01468	-4.03471e-10	6.55051e-12	-7.65893e-11
		0.0147	-4.03481e-10	-3.18478e-11	-1.19431e-10																0.0147	-4.03481e-10	6.46957e-12	-7.66327e-11
		0.01472	-4.03491e-10	-3.18682e-11	-1.19459e-10																0.01472	-4.03491e-10	6.38639e-12	-7.66775e-11
		0.01474	-4.035e-10	-3.18871e-11	-1.19489e-10																0.01474	-4.035e-10	6.3009e-12	-7.67232e-11
		0.01476	-4.03508e-10	-3.19045e-11	-1.1952e-10																0.01476	-4.03508e-10	6.21297e-12	-7.67697e-11
		0.01478	-4.03515e-10	-3.19204e-11	-1.19553e-10																0.01478	-4.03515e-10	6.12248e-12	-7.68167e-11
		0.0148	-4.03522e-10	-3.19347e-11	-1.19588e-10																0.0148	-4.03522e-10	6.02935e-12	-7.6864e-11
		0.01482	-4.03526e-10	-3.19476e-11	-1.19625e-10																0.01482	-4.03526e-10	5.93354e-12	-7.69115e-11
		0.01484	-4.0353e-10	-3.19593e-11	-1.19662e-10																0.01484	-4.0353e-10	5.83509e-12	-7.6959e-11
		0.01486	-4.03532e-10	-3.19701e-11	-1.19701e-10																0.01486	-4.03532e-10	5.73413e-12	-7.70064e-11
		0.01488	-4.03534e-10	-3.19802e-11	-1.19742e-10																0.01488	-4.03534e-10	5.63083e-12	-7.70536e-11
		0.0149	-4.03535e-10	-3.19897e-11	-1.19782e-10																0.0149	-4.03535e-10	5.5254e-12	-7.71005e-11
		0.01492	-4.03536e-10	-3.19989e-11	-1.19823e-10																0.01492	-4.03536e-10	5.41811e-12	-7.71469e-11
		0.01494	-4.03537e-10	-3.2008e-11	-1.19864e-10																0.01494	-4.03537e-10	5.30924e-12	-7.71925e-11
		0.01496	-4.03538e-10	-3.20168e-11	-1.19905e-10																0.01496	-4.03538e-10	5.19911e-12	-7.72372e-11
		0.01498	-4.03541e-10	-3.20255e-11	-1.19945e-10																0.01498	-4.03541e-10	5.08798e-12	-7.72806e-11
		0.015	-4.03546e-10	-3.20341e-11	-1.19984e-10																0.015	-4.03546e-10	4.97608e-12	-7.73227e-11
		0.01502	-4.03552e-10	-3.20427e-11	-1.20022e-10																0.01502	-4.03552e-10	4.8636e-12	-7.73631e-11
		0.01504	-4.0356e-10	-3.20513e-11	-1.2006e-10																0.01504	-4.0356e-10	4.75071e-12	-7.74017e-11
		0.01506	-4.03569e-10	-3.206e-11	-1.20096e-10																0.01506	-4.03569e-10	4.63755e-12	-7.74387e-11
		0.01508	-4.03581e-10	-3.20688e-11	-1.20132e-10																0.01508	-4.03581e-10	4.52422e-12	-7.74739e-11
		0.0151	-4.03594e-10	-3.2078e-11	-1.20167e-10																0.0151	-4.03594e-10	4.41086e-12	-7.75073e-11
		0.01512	-4.03608e-10	-3.20875e-11	-1.20201e-10																0.01512	-4.03608e-10	4.2977e-12	-7.7539e-11
		0.01514	-4.03624e-10	-3.20973e-11	-1.20234e-10																0.01514	-4.03624e-10	4.18499e-12	-7.7569e-11
		0.01516	-4.03641e-10	-3.21077e-11	-1.20267e-10																0.01516	-4.03641e-10	4.07306e-12	-7.75976e-11
		0.01518	-4.0366e-10	-3.21186e-11	-1.20299e-10																0.01518	-4.0366e-10	3.96223e-12	-7.76246e-11
		0.0152	-4.0368e-10	-3.21301e-11	-1.2033e-10																0.0152	-4.0368e-10	3.85281e-12	-7.76502e-11
		0.01522	-4.03701e-10	-3.21422e-11	-1.2036e-10																0.01522	-4.03701e-10	3.74507e-12	-7.76743e-11
		0.01524	-4.03724e-10	-3.2155e-11	-1.20389e-10																0.01524	-4.03724e-10	3.63924e-12	-7.76972e-11
		0.01526	-4.03748e-10	-3.21685e-11	-1.20418e-10																0.01526	-4.03748e-10	3.53548e-12	-7.77188e-11
		0.01528	-4.03774e-10	-3.21824e-11	-1.20445e-10																0.01528	-4.03774e-10	3.43396e-12	-7.77394e-11
		0.0153	-4.03801e-10	-3.21969e-11	-1.20472e-10																0.0153	-4.03801e-10	3.33486e-12	-7.77591e-11
		0.01532	-4.03829e-10	-3.22117e-11	-1.20497e-10																0.01532	-4.03829e-10	3.23837e-12	-7.77781e-11
		0.01534	-4.03859e-10	-3.22269e-11	-1.20522e-10																0.01534	-4.03859e-10	3.1447e-12	-7.77964e-11
		0.01536	-4.03891e-10	-3.22424e-11	-1.20545e-10																0.01536	-4.03891e-10	3.05408e-12	-7.78145e-11
		0.01538	-4.03924e-10	-3.22584e-11	-1.20566e-10																0.01538	-4.03924e-10	2.96676e-12	-7.78323e-11
		0.0154	-4.03958e-10	-3.22747e-11	-1.20587e-10																0.0154	-4.03958e-10	2.88295e-12	-7.78501e-11
		0.01542	-4.03993e-10	-3.22914e-11	-1.20605e-10																0.01542	-4.03993e-10	2.80282e-12	-7.78679e-11
		0.01544	-4.0403e-10	-3.23085e-11	-1.20622e-10																0.01544	-4.0403e-10	2.7265e-12	-7.7886e-11
		0.01546	-4.04067e-10	-3.2326e-11	-1.20637e-10																0.01546	-4.04067e-10	2.65402e-12	-7.79044e-11
		0.01548	-4.04106e-10	-3.23441e-11	-1.2065e-10																0.01548	-4.04106e-10	2.58532e-12	-7.79231e-11
		0.0155	-4.04146e-10	-3.23627e-11	-1.20661e-10																0.0155	-4.04146e-10	2.52028e-12	-7.79422e-11
		0.01552	-4.04187e-10	-3.23822e-11	-1.2067e-10																0.01552	-4.04187e-10	2.45876e-12	-7.79617e-11
		0.01554	-4.04228e-10	-3.24027e-11	-1.20677e-10																0.01554	-4.04228e-10	2.40056e-12	-7.79816e-11
		0.01556	-4.04271e-10	-3.24244e-11	-1.20682e-10																0.01556	-4.04271e-10	2.3455e-12	-7.80018e-11
		0.01558	-4.04314e-10	-3.24474e-11	-1.20686e-10																0.01558	-4.04314e-10	2.29346e-12	-7.80222e-11
		0.0156	-4.04358e-10	-3.24721e-11	-1.20688e-10																0.0156	-4.04358e-10	2.24432e-12	-7.80427e-11
		0.01562	-4.04402e-10	-3.24985e-11	-1.20688e-10																0.01562	-4.04402e-10	2.19791e-12	-7.80634e-11
		0.01564	-4.04447e-10	-3.25267e-11	-1.20687e-10																0.01564	-4.04447e-10	2.15403e-12	-7.80841e-11
		0.01566	-4.04492e-10	-3.25569e-11	-1.20685e-10																0.01566	-4.04492e-10	2.11241e-12	-7.81049e-11
		0.01568	-4.04536e-10	-3.25891e-11	-1.20682e-10																0.01568	-4.04536e-10	2.07268e-12	-7.81258e-11
		0.0157	-4.0458e-10	-3.26233e-11	-1.20678e-10																0.0157	-4.0458e-10	2.03448e-12	-7.81469e-11
		0.01572	-4.04623e-10	-3.26594e-11	-1.20673e-10																0.01572	-4.04623e-10	1.99741e-12	-7.81683e-11
		0.01574	-4.04665e-10	-3.26973e-11	-1.20668e-10																0.01574	-4.04665e-10	1.96118e-12	-7.819e-11
		0.01576	-4.04706e-10	-3.2737e-11	-1.20662e-10																0.01576	-4.04706e-10	1.92552e-12	-7.82121e-11
		0.01578	-4.04746e-10	-3.27782e-11	-1.20656e-10																0.01578	-4.04746e-10	1.89018e-12	-7.82346e-11
		0.0158	-4.04786e-10	-3.28207e-11	-1.20649e-10																0.0158	-4.04786e-10	1.85489e-12	-7.82576e-11
		0.01582	-4.04824e-10	-3.28643e-11	-1.20642e-10																0.01582	-4.04824e-10	1.81935e-12	-7.8281e-11
		0.01584	-4.04861e-10	-3.2909e-11	-1.20635e-10																0.01584	-4.04861e-10	1.78326e-12	-7.83049e-11
		0.01586	-4.04898e-10	-3.29544e-11	-1.20627e-10																0.01586	-4.04898e-10	1.74634e-12	-7.83292e-11
		0.01588	-4.04934e-10	-3.30004e-11	-1.20618e-10																0.01588	-4.04934e-10	1.70832e-12	-7.83539e-11
		0.0159	-4.0497e-10	-3.30469e-11	-1.2061e-10																0.0159	-4.0497e-10	1.66898e-12	-7.8379e-11
		0.01592	-4.05004e-10	-3.30939e-11	-1.20602e-10																0.01592	-4.05004e-10	1.62812e-12	-7.84044e-11
		0.01594	-4.05039e-10	-3.31411e-11	-1.20593e-10																0.01594	-4.05039e-10	1.58559e-12	-7.84301e-11
		0.01596	-4.05073e-10	-3.31887e-11	-1.20585e-10																0.01596	-4.05073e-10	1.54128e-12	-7.84562e-11
		0.01598	-4.05106e-10	-3.32365e-11	-1.20577e-10																0.01598	-4.05106e-10	1.49512e-12	-7.84827e-11
		0.016	-4.0514e-10	-3.32845e-11	-1.2057e-10																0.016	-4.0514e-10	1.44701e-12	-7.85097e-11
		0.01602	-4.05173e-10	-3.33325e-11	-1.20564e-10																0.01602	-4.05173e-10	1.39691e-12	-7.85369e-11
		0.01604	-4.05206e-10	-3.33804e-11	-1.20559e-10																0.01604	-4.05206e-10	1.34476e-12	-7.85644e-11
		0.01606	-4.05239e-10	-3.34281e-11	-1.20554e-10																0.01606	-4.05239e-10	1.29054e-12	-7.85919e-11
		0.01608	-4.05272e-10	-3.34752e-11	-1.20551e-10																0.01608	-4.05272e-10	1.23421e-12	-7.86195e-11
		0.0161	-4.05304e-10	-3.35218e-11	-1.20549e-10																0.0161	-4.05304e-10	1.17575e-12	-7.86469e-11
		0.01612	-4.05335e-10	-3.35675e-11	-1.20549e-10																0.01612	-4.05335e-10	1.11514e-12	-7.86742e-11
		0.01614	-4.05366e-10	-3.36121e-11	-1.20549e-10																0.01614	-4.05366e-10	1.05235e-12	-7.87013e-11
		0.01616	-4.05395e-10	-3.36555e-11	-1.20552e-10																0.01616	-4.05395e-10	9.87329e-13	-7.87282e-11
		0.01618	-4.05424e-10	-3.36975e-11	-1.20555e-10																0.01618	-4.05424e-10	9.20008e-13	-7.8755e-11
		0.0162	-4.05451e-10	-3.37379e-11	-1.2056e-10																0.0162	-4.05451e-10	8.50294e-13	-7.87816e-11
		0.01622	-4.05477e-10	-3.37764e-11	-1.20566e-10																0.01622	-4.05477e-10	7.78052e-13	-7.88081e-11
		0.01624	-4.05502e-10	-3.3813e-11	-1.20574e-10																0.01624	-4.05502e-10	7.03182e-13	-7.88342e-11
		0.01626	-4.05525e-10	-3.38474e-11	-1.20582e-10																0.01626	-4.05525e-10	6.25644e-13	-7.88597e-11
		0.01628	-4.05546e-10	-3.38795e-11	-1.20592e-10																0.01628	-4.05546e-10	5.45457e-13	-7.88846e-11
		0.0163	-4.05564e-10	-3.39095e-11	-1.20602e-10																0.0163	-4.05564e-10	4.62688e-13	-7.89086e-11
		0.01632	-4.05581e-10	-3.39371e-11	-1.20614e-10																0.01632	-4.05581e-10	3.77463e-13	-7.89317e-11
		0.01634	-4.05594e-10	-3.39625e-11	-1.20627e-10																0.01634	-4.05594e-10	2.89921e-13	-7.89535e-11
		0.01636	-4.05605e-10	-3.39856e-11	-1.2064e-10																0.01636	-4.05605e-10	2.00174e-13	-7.89742e-11
		0.01638	-4.05614e-10	-3.40064e-11	-1.20655e-10																0.01638	-4.05614e-10	1.08359e-13	-7.89935e-11
		0.0164	-4.05619e-10	-3.40248e-11	-1.2067e-10																0.0164	-4.05619e-10	1.46481e-14	-7.90115e-11
		0.01642	-4.05621e-10	-3.40408e-11	-1.20687e-10																0.01642	-4.05621e-10	-8.07498e-14	-7.90283e-11
		0.01644	-4.05621e-10	-3.40543e-11	-1.20703e-10																0.01644	-4.05621e-10	-1.77619e-13	-7.90439e-11
		0.01646	-4.05618e-10	-3.40654e-11	-1.2072e-10																0.01646	-4.05618e-10	-2.75743e-13	-7.90582e-11
		0.01648	-4.05612e-10	-3.4074e-11	-1.20737e-10																0.01648	-4.05612e-10	-3.74897e-13	-7.90713e-11
		0.0165	-4.05604e-10	-3.40802e-11	-1.20755e-10																0.0165	-4.05604e-10	-4.74858e-13	-7.90833e-11
		0.01652	-4.05593e-10	-3.40839e-11	-1.20773e-10																0.01652	-4.05593e-10	-5.75391e-13	-7.90942e-11
		0.01654	-4.0558e-10	-3.40854e-11	-1.2079e-10																0.01654	-4.0558e-10	-6.76224e-13	-7.91039e-11
		0.01656	-4.05564e-10	-3.40847e-11	-1.20808e-10																0.01656	-4.05564e-10	-7.77052e-13	-7.91125e-11
		0.01658	-4.05547e-10	-3.40819e-11	-1.20826e-10																0.01658	-4.05547e-10	-8.77567e-13	-7.91198e-11
		0.0166	-4.05528e-10	-3.40772e-11	-1.20844e-10																0.0166	-4.05528e-10	-9.77464e-13	-7.9126e-11
		0.01662	-4.05507e-10	-3.40709e-11	-1.20862e-10																0.01662	-4.05507e-10	-1.07645e-12	-7.91312e-11
		0.01664	-4.05484e-10	-3.40632e-11	-1.20879e-10																0.01664	-4.05484e-10	-1.17424e-12	-7.91354e-11
		0.01666	-4.05461e-10	-3.40543e-11	-1.20897e-10																0.01666	-4.05461e-10	-1.27058e-12	-7.91388e-11
		0.01668	-4.05436e-10	-3.40447e-11	-1.20915e-10																0.01668	-4.05436e-10	-1.36517e-12	-7.91415e-11
		0.0167	-4.0541e-10	-3.40344e-11	-1.20933e-10																0.0167	-4.0541e-10	-1.45772e-12	-7.91436e-11
		0.01672	-4.05383e-10	-3.40235e-11	-1.20951e-10																0.01672	-4.05383e-10	-1.5479e-12	-7.91453e-11
		0.01674	-4.05356e-10	-3.40123e-11	-1.20969e-10																0.01674	-4.05356e-10	-1.63536e-12	-7.91466e-11
		0.01676	-4.05328e-10	-3.4001e-11	-1.20986e-10																0.01676	-4.05328e-10	-1.71966e-12	-7.91476e-11
		0.01678	-4.053e-10	-3.39896e-11	-1.21003e-10																0.01678	-4.053e-10	-1.8003e-12	-7.91482e-11
		0.0168	-4.05271e-10	-3.39785e-11	-1.21019e-10																0.0168	-4.05271e-10	-1.87675e-12	-7.91485e-11
		0.01682	-4.05241e-10	-3.39676e-11	-1.21034e-10																0.01682	-4.05241e-10	-1.94851e-12	-7.91484e-11
		0.01684	-4.0521e-10	-3.39573e-11	-1.21049e-10																0.01684	-4.0521e-10	-2.01512e-12	-7.91479e-11
		0.01686	-4.05177e-10	-3.39476e-11	-1.21063e-10																0.01686	-4.05177e-10	-2.07622e-12	-7.91468e-11
		0.01688	-4.05143e-10	-3.39385e-11	-1.21076e-10																0.01688	-4.05143e-10	-2.1315e-12	-7.91451e-11
		0.0169	-4.05107e-10	-3.39303e-11	-1.21089e-10																0.0169	-4.05107e-10	-2.18072e-12	-7.91427e-11
		0.01692	-4.05069e-10	-3.39229e-11	-1.21102e-10																0.01692	-4.05069e-10	-2.22368e-12	-7.91395e-11
		0.01694	-4.05029e-10	-3.39164e-11	-1.21114e-10																0.01694	-4.05029e-10	-2.26022e-12	-7.91356e-11
		0.01696	-4.04987e-10	-3.39111e-11	-1.21125e-10																0.01696	-4.04987e-10	-2.29026e-12	-7.9131e-11
		0.01698	-4.04944e-10	-3.39069e-11	-1.21137e-10																0.01698	-4.04944e-10	-2.3137e-12	-7.91256e-11
		0.017	-4.04898e-10	-3.3904e-11	-1.21148e-10																0.017	-4.04898e-10	-2.33042e-12	-7.91195e-11
		0.01702	-4.04851e-10	-3.39024e-11	-1.21158e-10																0.01702	-4.04851e-10	-2.34028e-12	-7.91127e-11
		0.01704	-4.04803e-10	-3.39022e-11	-1.21169e-10																0.01704	-4.04803e-10	-2.34312e-12	-7.91052e-11
		0.01706	-4.04754e-10	-3.39032e-11	-1.21179e-10																0.01706	-4.04754e-10	-2.33877e-12	-7.9097e-11
		0.01708	-4.04704e-10	-3.39054e-11	-1.21188e-10																0.01708	-4.04704e-10	-2.32706e-12	-7.90881e-11
		0.0171	-4.04654e-10	-3.39089e-11	-1.21197e-10																0.0171	-4.04654e-10	-2.3079e-12	-7.90783e-11
		0.01712	-4.04603e-10	-3.39136e-11	-1.21206e-10																0.01712	-4.04603e-10	-2.28131e-12	-7.90677e-11
		0.01714	-4.04552e-10	-3.39195e-11	-1.21213e-10																0.01714	-4.04552e-10	-2.2474e-12	-7.90564e-11
		0.01716	-4.04502e-10	-3.39268e-11	-1.21219e-10																0.01716	-4.04502e-10	-2.20639e-12	-7.90443e-11
		0.01718	-4.04453e-10	-3.39353e-11	-1.21225e-10																0.01718	-4.04453e-10	-2.15855e-12	-7.90315e-11
		0.0172	-4.04404e-10	-3.39452e-11	-1.21229e-10																0.0172	-4.04404e-10	-2.10418e-12	-7.90178e-11
		0.01722	-4.04357e-10	-3.39566e-11	-1.21233e-10																0.01722	-4.04357e-10	-2.04358e-12	-7.90035e-11
		0.01724	-4.04312e-10	-3.39696e-11	-1.21235e-10																0.01724	-4.04312e-10	-1.97704e-12	-7.89885e-11
		0.01726	-4.04267e-10	-3.39843e-11	-1.21236e-10																0.01726	-4.04267e-10	-1.90483e-12	-7.89729e-11
		0.01728	-4.04225e-10	-3.40008e-11	-1.21237e-10																0.01728	-4.04225e-10	-1.82722e-12	-7.89568e-11
		0.0173	-4.04185e-10	-3.40193e-11	-1.21237e-10																0.0173	-4.04185e-10	-1.74459e-12	-7.894e-11
		0.01732	-4.04148e-10	-3.40399e-11	-1.21236e-10																0.01732	-4.04148e-10	-1.65733e-12	-7.89226e-11
		0.01734	-4.04113e-10	-3.40629e-11	-1.21235e-10																0.01734	-4.04113e-10	-1.56594e-12	-7.89046e-11
		0.01736	-4.04081e-10	-3.40882e-11	-1.21233e-10																0.01736	-4.04081e-10	-1.47094e-12	-7.88859e-11
		0.01738	-4.04052e-10	-3.4116e-11	-1.2123e-10																0.01738	-4.04052e-10	-1.37288e-12	-7.88664e-11
		0.0174	-4.04027e-10	-3.41463e-11	-1.21227e-10																0.0174	-4.04027e-10	-1.27226e-12	-7.88462e-11
		0.01742	-4.04004e-10	-3.41791e-11	-1.21224e-10																0.01742	-4.04004e-10	-1.16956e-12	-7.88251e-11
		0.01744	-4.03985e-10	-3.42144e-11	-1.2122e-10																0.01744	-4.03985e-10	-1.06524e-12	-7.88032e-11
		0.01746	-4.03969e-10	-3.4252e-11	-1.21216e-10																0.01746	-4.03969e-10	-9.59717e-13	-7.87805e-11
		0.01748	-4.03955e-10	-3.42917e-11	-1.21211e-10																0.01748	-4.03955e-10	-8.53337e-13	-7.87571e-11
		0.0175	-4.03945e-10	-3.43334e-11	-1.21207e-10																0.0175	-4.03945e-10	-7.46417e-13	-7.87331e-11
		0.01752	-4.03937e-10	-3.43768e-11	-1.21202e-10																0.01752	-4.03937e-10	-6.39224e-13	-7.87085e-11
		0.01754	-4.03931e-10	-3.44215e-11	-1.21196e-10																0.01754	-4.03931e-10	-5.31957e-13	-7.86836e-11
		0.01756	-4.03928e-10	-3.44674e-11	-1.2119e-10																0.01756	-4.03928e-10	-4.24814e-13	-7.86585e-11
		0.01758	-4.03927e-10	-3.45143e-11	-1.21183e-10																0.01758	-4.03927e-10	-3.18005e-13	-7.86331e-11
		0.0176	-4.0393e-10	-3.45619e-11	-1.21176e-10																0.0176	-4.0393e-10	-2.11714e-13	-7.86077e-11
		0.01762	-4.03935e-10	-3.461e-11	-1.21168e-10																0.01762	-4.03935e-10	-1.06077e-13	-7.85823e-11
		0.01764	-4.03943e-10	-3.46586e-11	-1.21159e-10																0.01764	-4.03943e-10	-1.18274e-15	-7.85568e-11
		0.01766	-4.03955e-10	-3.47073e-11	-1.21149e-10																0.01766	-4.03955e-10	1.0288e-13	-7.85314e-11
		0.01768	-4.0397e-10	-3.4756e-11	-1.21138e-10																0.01768	-4.0397e-10	2.06016e-13	-7.8506e-11
		0.0177	-4.03988e-10	-3.48047e-11	-1.21127e-10																0.0177	-4.03988e-10	3.08128e-13	-7.84805e-11
		0.01772	-4.04009e-10	-3.48532e-11	-1.21114e-10																0.01772	-4.04009e-10	4.09081e-13	-7.8455e-11
		0.01774	-4.04033e-10	-3.49015e-11	-1.21101e-10																0.01774	-4.04033e-10	5.08706e-13	-7.84295e-11
		0.01776	-4.04059e-10	-3.49495e-11	-1.21086e-10																0.01776	-4.04059e-10	6.06823e-13	-7.84042e-11
		0.01778	-4.04087e-10	-3.49973e-11	-1.21071e-10																0.01778	-4.04087e-10	7.03279e-13	-7.83792e-11
		0.0178	-4.04116e-10	-3.50449e-11	-1.21056e-10																0.0178	-4.04116e-10	7.97934e-13	-7.83546e-11
		0.01782	-4.04147e-10	-3.50921e-11	-1.21039e-10																0.01782	-4.04147e-10	8.90667e-13	-7.83305e-11
		0.01784	-4.04178e-10	-3.51391e-11	-1.21023e-10																0.01784	-4.04178e-10	9.81367e-13	-7.83068e-11
		0.01786	-4.0421e-10	-3.51857e-11	-1.21006e-10																0.01786	-4.0421e-10	1.06988e-12	-7.82838e-11
		0.01788	-4.04243e-10	-3.52319e-11	-1.20988e-10																0.01788	-4.04243e-10	1.156e-12	-7.82614e-11
		0.0179	-4.04275e-10	-3.52777e-11	-1.20971e-10																0.0179	-4.04275e-10	1.23945e-12	-7.82396e-11
		0.01792	-4.04306e-10	-3.53229e-11	-1.20953e-10																0.01792	-4.04306e-10	1.31988e-12	-7.82184e-11
		0.01794	-4.04337e-10	-3.53673e-11	-1.20935e-10																0.01794	-4.04337e-10	1.39693e-12	-7.8198e-11
		0.01796	-4.04368e-10	-3.54109e-11	-1.20917e-10																0.01796	-4.04368e-10	1.47027e-12	-7.81783e-11
		0.01798	-4.04397e-10	-3.54533e-11	-1.20899e-10																0.01798	-4.04397e-10	1.53965e-12	-7.81593e-11
		0.018	-4.04425e-10	-3.54943e-11	-1.2088e-10																0.018	-4.04425e-10	1.60489e-12	-7.8141e-11
		0.01802	-4.04452e-10	-3.55338e-11	-1.20861e-10																0.01802	-4.04452e-10	1.66592e-12	-7.81235e-11
		0.01804	-4.04477e-10	-3.55714e-11	-1.20842e-10																0.01804	-4.04477e-10	1.72271e-12	-7.81067e-11
		0.01806	-4.045e-10	-3.56071e-11	-1.20823e-10																0.01806	-4.045e-10	1.77529e-12	-7.80908e-11
		0.01808	-4.04522e-10	-3.56407e-11	-1.20803e-10																0.01808	-4.04522e-10	1.82369e-12	-7.80758e-11
		0.0181	-4.04542e-10	-3.5672e-11	-1.20783e-10																0.0181	-4.04542e-10	1.86796e-12	-7.80616e-11
		0.01812	-4.0456e-10	-3.5701e-11	-1.20763e-10																0.01812	-4.0456e-10	1.9081e-12	-7.80483e-11
		0.01814	-4.04576e-10	-3.57277e-11	-1.20742e-10																0.01814	-4.04576e-10	1.94402e-12	-7.80361e-11
		0.01816	-4.0459e-10	-3.5752e-11	-1.2072e-10																0.01816	-4.0459e-10	1.97564e-12	-7.80247e-11
		0.01818	-4.04602e-10	-3.57741e-11	-1.20698e-10																0.01818	-4.04602e-10	2.00283e-12	-7.80141e-11
		0.0182	-4.04611e-10	-3.57939e-11	-1.20676e-10																0.0182	-4.04611e-10	2.02549e-12	-7.80042e-11
		0.01822	-4.04618e-10	-3.58116e-11	-1.20653e-10																0.01822	-4.04618e-10	2.04357e-12	-7.79952e-11
		0.01824	-4.04623e-10	-3.58272e-11	-1.20631e-10																0.01824	-4.04623e-10	2.05708e-12	-7.79869e-11
		0.01826	-4.04625e-10	-3.58407e-11	-1.20608e-10																0.01826	-4.04625e-10	2.06605e-12	-7.79795e-11
		0.01828	-4.04625e-10	-3.58522e-11	-1.20586e-10																0.01828	-4.04625e-10	2.07061e-12	-7.79731e-11
		0.0183	-4.04622e-10	-3.58615e-11	-1.20564e-10																0.0183	-4.04622e-10	2.07089e-12	-7.79678e-11
		0.01832	-4.04617e-10	-3.58687e-11	-1.20543e-10																0.01832	-4.04617e-10	2.06708e-12	-7.79638e-11
		0.01834	-4.0461e-10	-3.58737e-11	-1.20522e-10																0.01834	-4.0461e-10	2.05932e-12	-7.79611e-11
		0.01836	-4.046e-10	-3.58767e-11	-1.20502e-10																0.01836	-4.046e-10	2.04776e-12	-7.79599e-11
		0.01838	-4.04587e-10	-3.58776e-11	-1.20483e-10																0.01838	-4.04587e-10	2.03255e-12	-7.79602e-11
		0.0184	-4.04573e-10	-3.58765e-11	-1.20465e-10																0.0184	-4.04573e-10	2.01386e-12	-7.7962e-11
		0.01842	-4.04556e-10	-3.58735e-11	-1.20448e-10																0.01842	-4.04556e-10	1.99186e-12	-7.79654e-11
		0.01844	-4.04537e-10	-3.58689e-11	-1.20433e-10																0.01844	-4.04537e-10	1.96673e-12	-7.79705e-11
		0.01846	-4.04516e-10	-3.58627e-11	-1.2042e-10																0.01846	-4.04516e-10	1.9387e-12	-7.79773e-11
		0.01848	-4.04493e-10	-3.5855e-11	-1.20408e-10																0.01848	-4.04493e-10	1.908e-12	-7.79857e-11
		0.0185	-4.04469e-10	-3.58459e-11	-1.20399e-10																0.0185	-4.04469e-10	1.8749e-12	-7.79959e-11
		0.01852	-4.04443e-10	-3.58355e-11	-1.20391e-10																0.01852	-4.04443e-10	1.83972e-12	-7.80079e-11
		0.01854	-4.04416e-10	-3.58237e-11	-1.20386e-10																0.01854	-4.04416e-10	1.80271e-12	-7.80216e-11
		0.01856	-4.04387e-10	-3.58106e-11	-1.20384e-10																0.01856	-4.04387e-10	1.76411e-12	-7.80369e-11
		0.01858	-4.04357e-10	-3.57963e-11	-1.20383e-10																0.01858	-4.04357e-10	1.72412e-12	-7.8054e-11
		0.0186	-4.04326e-10	-3.57808e-11	-1.20386e-10																0.0186	-4.04326e-10	1.68298e-12	-7.80726e-11
		0.01862	-4.04294e-10	-3.5764e-11	-1.20391e-10																0.01862	-4.04294e-10	1.64096e-12	-7.80929e-11
		0.01864	-4.0426e-10	-3.5746e-11	-1.20398e-10																0.01864	-4.0426e-10	1.59842e-12	-7.81146e-11
		0.01866	-4.04226e-10	-3.57268e-11	-1.20408e-10																0.01866	-4.04226e-10	1.55578e-12	-7.8138e-11
		0.01868	-4.0419e-10	-3.57063e-11	-1.2042e-10																0.01868	-4.0419e-10	1.51354e-12	-7.81628e-11
		0.0187	-4.04153e-10	-3.56847e-11	-1.20435e-10																0.0187	-4.04153e-10	1.47213e-12	-7.81893e-11
		0.01872	-4.04116e-10	-3.56621e-11	-1.20453e-10																0.01872	-4.04116e-10	1.43197e-12	-7.82175e-11
		0.01874	-4.04077e-10	-3.56386e-11	-1.20473e-10																0.01874	-4.04077e-10	1.39337e-12	-7.82475e-11
		0.01876	-4.04037e-10	-3.56144e-11	-1.20495e-10																0.01876	-4.04037e-10	1.35657e-12	-7.82795e-11
		0.01878	-4.03997e-10	-3.55895e-11	-1.20519e-10																0.01878	-4.03997e-10	1.32169e-12	-7.83134e-11
		0.0188	-4.03956e-10	-3.55643e-11	-1.20546e-10																0.0188	-4.03956e-10	1.28888e-12	-7.83493e-11
		0.01882	-4.03916e-10	-3.55387e-11	-1.20575e-10																0.01882	-4.03916e-10	1.25824e-12	-7.83873e-11
		0.01884	-4.03877e-10	-3.55129e-11	-1.20606e-10																0.01884	-4.03877e-10	1.22992e-12	-7.84271e-11
		0.01886	-4.03838e-10	-3.5487e-11	-1.20639e-10																0.01886	-4.03838e-10	1.20403e-12	-7.84688e-11
		0.01888	-4.03801e-10	-3.5461e-11	-1.20674e-10																0.01888	-4.03801e-10	1.1807e-12	-7.85121e-11
		0.0189	-4.03766e-10	-3.5435e-11	-1.2071e-10																0.0189	-4.03766e-10	1.16003e-12	-7.85571e-11
		0.01892	-4.03733e-10	-3.54092e-11	-1.20748e-10																0.01892	-4.03733e-10	1.14213e-12	-7.86036e-11
		0.01894	-4.03702e-10	-3.53836e-11	-1.20788e-10																0.01894	-4.03702e-10	1.12706e-12	-7.86513e-11
		0.01896	-4.03673e-10	-3.53583e-11	-1.20828e-10																0.01896	-4.03673e-10	1.11492e-12	-7.87001e-11
		0.01898	-4.03646e-10	-3.53335e-11	-1.2087e-10																0.01898	-4.03646e-10	1.10573e-12	-7.87497e-11
		0.019	-4.03621e-10	-3.53092e-11	-1.20913e-10																0.019	-4.03621e-10	1.09945e-12	-7.88e-11
		0.01902	-4.03598e-10	-3.52855e-11	-1.20957e-10																0.01902	-4.03598e-10	1.09599e-12	-7.88506e-11
		0.01904	-4.03577e-10	-3.52626e-11	-1.21002e-10																0.01904	-4.03577e-10	1.09525e-12	-7.89015e-11
		0.01906	-4.03557e-10	-3.52406e-11	-1.21046e-10																0.01906	-4.03557e-10	1.09711e-12	-7.89522e-11
		0.01908	-4.03539e-10	-3.52196e-11	-1.2109e-10																0.01908	-4.03539e-10	1.10147e-12	-7.90027e-11
		0.0191	-4.03522e-10	-3.52e-11	-1.21134e-10																0.0191	-4.03522e-10	1.10827e-12	-7.90525e-11
		0.01912	-4.03507e-10	-3.51818e-11	-1.21178e-10																0.01912	-4.03507e-10	1.11746e-12	-7.91014e-11
		0.01914	-4.03493e-10	-3.51651e-11	-1.21221e-10																0.01914	-4.03493e-10	1.12898e-12	-7.91492e-11
		0.01916	-4.03481e-10	-3.51502e-11	-1.21263e-10																0.01916	-4.03481e-10	1.14279e-12	-7.91954e-11
		0.01918	-4.0347e-10	-3.51369e-11	-1.21304e-10																0.01918	-4.0347e-10	1.15885e-12	-7.92398e-11
		0.0192	-4.03461e-10	-3.51254e-11	-1.21343e-10																0.0192	-4.03461e-10	1.17712e-12	-7.92821e-11
		0.01922	-4.03454e-10	-3.51155e-11	-1.21381e-10																0.01922	-4.03454e-10	1.19754e-12	-7.93219e-11
		0.01924	-4.03448e-10	-3.51073e-11	-1.21417e-10																0.01924	-4.03448e-10	1.22006e-12	-7.9359e-11
		0.01926	-4.03444e-10	-3.51006e-11	-1.21451e-10																0.01926	-4.03444e-10	1.24462e-12	-7.9393e-11
		0.01928	-4.03441e-10	-3.50955e-11	-1.21483e-10																0.01928	-4.03441e-10	1.27116e-12	-7.94237e-11
		0.0193	-4.0344e-10	-3.50918e-11	-1.21512e-10																0.0193	-4.0344e-10	1.29963e-12	-7.9451e-11
		0.01932	-4.0344e-10	-3.50897e-11	-1.21538e-10																0.01932	-4.0344e-10	1.33001e-12	-7.94746e-11
		0.01934	-4.03441e-10	-3.50891e-11	-1.21561e-10																0.01934	-4.03441e-10	1.36231e-12	-7.94944e-11
		0.01936	-4.03443e-10	-3.509e-11	-1.21581e-10																0.01936	-4.03443e-10	1.39654e-12	-7.95104e-11
		0.01938	-4.03445e-10	-3.50924e-11	-1.21598e-10																0.01938	-4.03445e-10	1.43272e-12	-7.95222e-11
		0.0194	-4.03449e-10	-3.50963e-11	-1.21611e-10																0.0194	-4.03449e-10	1.47089e-12	-7.953e-11
		0.01942	-4.03454e-10	-3.51018e-11	-1.21621e-10																0.01942	-4.03454e-10	1.51106e-12	-7.95336e-11
		0.01944	-4.0346e-10	-3.51089e-11	-1.21628e-10																0.01944	-4.0346e-10	1.55321e-12	-7.95329e-11
		0.01946	-4.03468e-10	-3.51176e-11	-1.21632e-10																0.01946	-4.03468e-10	1.5973e-12	-7.9528e-11
		0.01948	-4.03478e-10	-3.51279e-11	-1.21632e-10																0.01948	-4.03478e-10	1.64319e-12	-7.95187e-11
		0.0195	-4.03489e-10	-3.51398e-11	-1.2163e-10																0.0195	-4.03489e-10	1.69074e-12	-7.9505e-11
		0.01952	-4.03502e-10	-3.51531e-11	-1.21624e-10																0.01952	-4.03502e-10	1.73971e-12	-7.9487e-11
		0.01954	-4.03518e-10	-3.51679e-11	-1.21617e-10																0.01954	-4.03518e-10	1.78982e-12	-7.94644e-11
		0.01956	-4.03535e-10	-3.5184e-11	-1.21607e-10																0.01956	-4.03535e-10	1.84075e-12	-7.94375e-11
		0.01958	-4.03554e-10	-3.52012e-11	-1.21595e-10																0.01958	-4.03554e-10	1.89217e-12	-7.94062e-11
		0.0196	-4.03574e-10	-3.52193e-11	-1.21582e-10																0.0196	-4.03574e-10	1.94368e-12	-7.93707e-11
		0.01962	-4.03595e-10	-3.52383e-11	-1.21566e-10																0.01962	-4.03595e-10	1.99486e-12	-7.93312e-11
		0.01964	-4.03617e-10	-3.52579e-11	-1.2155e-10																0.01964	-4.03617e-10	2.04532e-12	-7.92878e-11
		0.01966	-4.0364e-10	-3.5278e-11	-1.21532e-10																0.01966	-4.0364e-10	2.09467e-12	-7.92407e-11
		0.01968	-4.03663e-10	-3.52988e-11	-1.21513e-10																0.01968	-4.03663e-10	2.14256e-12	-7.91899e-11
		0.0197	-4.03687e-10	-3.532e-11	-1.21493e-10																0.0197	-4.03687e-10	2.18868e-12	-7.91358e-11
		0.01972	-4.03711e-10	-3.53416e-11	-1.21473e-10																0.01972	-4.03711e-10	2.23278e-12	-7.90785e-11
		0.01974	-4.03736e-10	-3.53635e-11	-1.21452e-10																0.01974	-4.03736e-10	2.27461e-12	-7.90181e-11
		0.01976	-4.03761e-10	-3.53856e-11	-1.21431e-10																0.01976	-4.03761e-10	2.31399e-12	-7.89547e-11
		0.01978	-4.03788e-10	-3.54077e-11	-1.2141e-10																0.01978	-4.03788e-10	2.35068e-12	-7.88886e-11
		0.0198	-4.03815e-10	-3.54299e-11	-1.21389e-10																0.0198	-4.03815e-10	2.38448e-12	-7.882e-11
		0.01982	-4.03843e-10	-3.5452e-11	-1.21368e-10																0.01982	-4.03843e-10	2.41513e-12	-7.8749e-11
		0.01984	-4.03871e-10	-3.5474e-11	-1.21348e-10																0.01984	-4.03871e-10	2.44232e-12	-7.86761e-11
		0.01986	-4.03901e-10	-3.54959e-11	-1.21327e-10																0.01986	-4.03901e-10	2.46575e-12	-7.86016e-11
		0.01988	-4.0393e-10	-3.55177e-11	-1.21307e-10																0.01988	-4.0393e-10	2.48511e-12	-7.85259e-11
		0.0199	-4.03959e-10	-3.55393e-11	-1.21287e-10																0.0199	-4.03959e-10	2.5001e-12	-7.84495e-11
		0.01992	-4.03988e-10	-3.55609e-11	-1.21267e-10																0.01992	-4.03988e-10	2.51046e-12	-7.83728e-11
		0.01994	-4.04016e-10	-3.55827e-11	-1.21248e-10																0.01994	-4.04016e-10	2.51597e-12	-7.82961e-11
		0.01996	-4.04044e-10	-3.56047e-11	-1.21229e-10																0.01996	-4.04044e-10	2.51648e-12	-7.82199e-11
		0.01998	-4.04071e-10	-3.56272e-11	-1.21211e-10																0.01998	-4.04071e-10	2.51184e-12	-7.81443e-11
		0.02	-4.04097e-10	-3.56504e-11	-1.21193e-10																0.02	-4.04097e-10	2.50197e-12	-7.80697e-11
		0.02002	-4.04121e-10	-3.56745e-11	-1.21176e-10																0.02002	-4.04121e-10	2.48675e-12	-7.79963e-11
		0.02004	-4.04145e-10	-3.56996e-11	-1.21161e-10																0.02004	-4.04145e-10	2.46609e-12	-7.79242e-11
		0.02006	-4.04169e-10	-3.57258e-11	-1.21146e-10																0.02006	-4.04169e-10	2.4399e-12	-7.78537e-11
		0.02008	-4.04192e-10	-3.57532e-11	-1.21133e-10																0.02008	-4.04192e-10	2.40807e-12	-7.77848e-11
		0.0201	-4.04214e-10	-3.57819e-11	-1.21121e-10																0.0201	-4.04214e-10	2.37058e-12	-7.77178e-11
		0.02012	-4.04236e-10	-3.58118e-11	-1.21111e-10																0.02012	-4.04236e-10	2.32749e-12	-7.76528e-11
		0.02014	-4.04257e-10	-3.58428e-11	-1.21102e-10																0.02014	-4.04257e-10	2.27901e-12	-7.75898e-11
		0.02016	-4.04277e-10	-3.58748e-11	-1.21094e-10																0.02016	-4.04277e-10	2.22548e-12	-7.75289e-11
		0.02018	-4.04296e-10	-3.59076e-11	-1.21088e-10																0.02018	-4.04296e-10	2.16738e-12	-7.74703e-11
		0.0202	-4.04315e-10	-3.5941e-11	-1.21084e-10																0.0202	-4.04315e-10	2.10521e-12	-7.74141e-11
		0.02022	-4.04333e-10	-3.59749e-11	-1.2108e-10																0.02022	-4.04333e-10	2.03952e-12	-7.73605e-11
		0.02024	-4.0435e-10	-3.60092e-11	-1.21078e-10																0.02024	-4.0435e-10	1.97083e-12	-7.73096e-11
		0.02026	-4.04367e-10	-3.60438e-11	-1.21077e-10																0.02026	-4.04367e-10	1.8996e-12	-7.72615e-11
		0.02028	-4.04383e-10	-3.60788e-11	-1.21077e-10																0.02028	-4.04383e-10	1.82625e-12	-7.72166e-11
		0.0203	-4.04399e-10	-3.61141e-11	-1.21078e-10																0.0203	-4.04399e-10	1.7511e-12	-7.71748e-11
		0.02032	-4.04415e-10	-3.61496e-11	-1.21079e-10																0.02032	-4.04415e-10	1.67444e-12	-7.71362e-11
		0.02034	-4.04431e-10	-3.61854e-11	-1.21081e-10																0.02034	-4.04431e-10	1.5965e-12	-7.7101e-11
		0.02036	-4.04447e-10	-3.62213e-11	-1.21084e-10																0.02036	-4.04447e-10	1.51749e-12	-7.70692e-11
		0.02038	-4.04464e-10	-3.6257e-11	-1.21087e-10																0.02038	-4.04464e-10	1.43755e-12	-7.70406e-11
		0.0204	-4.04481e-10	-3.62924e-11	-1.21091e-10																0.0204	-4.04481e-10	1.35686e-12	-7.70152e-11
		0.02042	-4.04498e-10	-3.63271e-11	-1.21095e-10																0.02042	-4.04498e-10	1.27558e-12	-7.69929e-11
		0.02044	-4.04516e-10	-3.63608e-11	-1.21099e-10																0.02044	-4.04516e-10	1.19392e-12	-7.69735e-11
		0.02046	-4.04534e-10	-3.63935e-11	-1.21103e-10																0.02046	-4.04534e-10	1.11214e-12	-7.69569e-11
		0.02048	-4.04552e-10	-3.6425e-11	-1.21107e-10																0.02048	-4.04552e-10	1.0305e-12	-7.6943e-11
		0.0205	-4.04571e-10	-3.64553e-11	-1.21111e-10																0.0205	-4.04571e-10	9.49203e-13	-7.69318e-11
		0.02052	-4.0459e-10	-3.64845e-11	-1.21115e-10																0.02052	-4.0459e-10	8.68434e-13	-7.69233e-11
		0.02054	-4.04608e-10	-3.65127e-11	-1.21118e-10																0.02054	-4.04608e-10	7.88311e-13	-7.69176e-11
		0.02056	-4.04626e-10	-3.654e-11	-1.21122e-10																0.02056	-4.04626e-10	7.08914e-13	-7.69148e-11
		0.02058	-4.04644e-10	-3.65665e-11	-1.21125e-10																0.02058	-4.04644e-10	6.30244e-13	-7.69149e-11
		0.0206	-4.04662e-10	-3.65921e-11	-1.21128e-10																0.0206	-4.04662e-10	5.52232e-13	-7.69177e-11
		0.02062	-4.04679e-10	-3.6617e-11	-1.21132e-10																0.02062	-4.04679e-10	4.7475e-13	-7.69233e-11
		0.02064	-4.04695e-10	-3.6641e-11	-1.21135e-10																0.02064	-4.04695e-10	3.97598e-13	-7.69314e-11
		0.02066	-4.0471e-10	-3.6664e-11	-1.21139e-10																0.02066	-4.0471e-10	3.20503e-13	-7.69419e-11
		0.02068	-4.04725e-10	-3.6686e-11	-1.21142e-10																0.02068	-4.04725e-10	2.43166e-13	-7.69546e-11
		0.0207	-4.04738e-10	-3.67068e-11	-1.21145e-10																0.0207	-4.04738e-10	1.65306e-13	-7.69695e-11
		0.02072	-4.04751e-10	-3.6726e-11	-1.21149e-10																0.02072	-4.04751e-10	8.67141e-14	-7.69861e-11
		0.02074	-4.04762e-10	-3.67436e-11	-1.21152e-10																0.02074	-4.04762e-10	7.27578e-15	-7.70045e-11
		0.02076	-4.04773e-10	-3.67591e-11	-1.21154e-10																0.02076	-4.04773e-10	-7.30187e-14	-7.70244e-11
		0.02078	-4.04783e-10	-3.67724e-11	-1.21157e-10																0.02078	-4.04783e-10	-1.54097e-13	-7.70458e-11
		0.0208	-4.04793e-10	-3.67831e-11	-1.21158e-10																0.0208	-4.04793e-10	-2.3586e-13	-7.70686e-11
		0.02082	-4.04802e-10	-3.67911e-11	-1.2116e-10																0.02082	-4.04802e-10	-3.18215e-13	-7.70927e-11
		0.02084	-4.04811e-10	-3.67964e-11	-1.2116e-10																0.02084	-4.04811e-10	-4.01141e-13	-7.71182e-11
		0.02086	-4.04819e-10	-3.67989e-11	-1.21161e-10																0.02086	-4.04819e-10	-4.84708e-13	-7.71449e-11
		0.02088	-4.04827e-10	-3.67987e-11	-1.21161e-10																0.02088	-4.04827e-10	-5.6902e-13	-7.71729e-11
		0.0209	-4.04835e-10	-3.67959e-11	-1.2116e-10																0.0209	-4.04835e-10	-6.54203e-13	-7.72021e-11
		0.02092	-4.04842e-10	-3.67903e-11	-1.21159e-10																0.02092	-4.04842e-10	-7.40366e-13	-7.72324e-11
		0.02094	-4.04849e-10	-3.67821e-11	-1.21158e-10																0.02094	-4.04849e-10	-8.27583e-13	-7.72638e-11
		0.02096	-4.04855e-10	-3.67713e-11	-1.21157e-10																0.02096	-4.04855e-10	-9.1585e-13	-7.72959e-11
		0.02098	-4.04861e-10	-3.6758e-11	-1.21155e-10																0.02098	-4.04861e-10	-1.00507e-12	-7.73288e-11
		0.021	-4.04866e-10	-3.67422e-11	-1.21153e-10																0.021	-4.04866e-10	-1.09509e-12	-7.73622e-11
		0.02102	-4.04871e-10	-3.6724e-11	-1.21151e-10																0.02102	-4.04871e-10	-1.18577e-12	-7.73959e-11
		0.02104	-4.04876e-10	-3.67036e-11	-1.2115e-10																0.02104	-4.04876e-10	-1.27696e-12	-7.74298e-11
		0.02106	-4.04881e-10	-3.66811e-11	-1.21149e-10																0.02106	-4.04881e-10	-1.36849e-12	-7.74636e-11
		0.02108	-4.04887e-10	-3.66567e-11	-1.21148e-10																0.02108	-4.04887e-10	-1.4602e-12	-7.74973e-11
		0.0211	-4.04894e-10	-3.66307e-11	-1.21148e-10																0.0211	-4.04894e-10	-1.55191e-12	-7.75306e-11
		0.02112	-4.04901e-10	-3.66034e-11	-1.21148e-10																0.02112	-4.04901e-10	-1.64337e-12	-7.75633e-11
		0.02114	-4.0491e-10	-3.65749e-11	-1.21149e-10																0.02114	-4.0491e-10	-1.73427e-12	-7.75953e-11
		0.02116	-4.0492e-10	-3.65457e-11	-1.21151e-10																0.02116	-4.0492e-10	-1.82423e-12	-7.76265e-11
		0.02118	-4.04931e-10	-3.65161e-11	-1.21154e-10																0.02118	-4.04931e-10	-1.91286e-12	-7.76569e-11
		0.0212	-4.04943e-10	-3.64863e-11	-1.21157e-10																0.0212	-4.04943e-10	-1.99982e-12	-7.76864e-11
		0.02122	-4.04957e-10	-3.64567e-11	-1.21162e-10																0.02122	-4.04957e-10	-2.0848e-12	-7.77151e-11
		0.02124	-4.04971e-10	-3.64275e-11	-1.21167e-10																0.02124	-4.04971e-10	-2.16755e-12	-7.77431e-11
		0.02126	-4.04987e-10	-3.63988e-11	-1.21173e-10																0.02126	-4.04987e-10	-2.24785e-12	-7.77705e-11
		0.02128	-4.05005e-10	-3.63707e-11	-1.21181e-10																0.02128	-4.05005e-10	-2.32552e-12	-7.77972e-11
		0.0213	-4.05023e-10	-3.63433e-11	-1.2119e-10																0.0213	-4.05023e-10	-2.40042e-12	-7.78234e-11
		0.02132	-4.05043e-10	-3.63166e-11	-1.212e-10																0.02132	-4.05043e-10	-2.4724e-12	-7.78491e-11
		0.02134	-4.05064e-10	-3.62906e-11	-1.21212e-10																0.02134	-4.05064e-10	-2.54128e-12	-7.78743e-11
		0.02136	-4.05086e-10	-3.62653e-11	-1.21225e-10																0.02136	-4.05086e-10	-2.60696e-12	-7.78989e-11
		0.02138	-4.05109e-10	-3.6241e-11	-1.21239e-10																0.02138	-4.05109e-10	-2.66933e-12	-7.7923e-11
		0.0214	-4.05133e-10	-3.62177e-11	-1.21254e-10																0.0214	-4.05133e-10	-2.72835e-12	-7.79466e-11
		0.02142	-4.05159e-10	-3.61956e-11	-1.2127e-10																0.02142	-4.05159e-10	-2.78398e-12	-7.79697e-11
		0.02144	-4.05185e-10	-3.61748e-11	-1.21287e-10																0.02144	-4.05185e-10	-2.83621e-12	-7.79923e-11
		0.02146	-4.05211e-10	-3.61556e-11	-1.21303e-10																0.02146	-4.05211e-10	-2.88502e-12	-7.80144e-11
		0.02148	-4.05238e-10	-3.61382e-11	-1.2132e-10																0.02148	-4.05238e-10	-2.93034e-12	-7.80359e-11
		0.0215	-4.05264e-10	-3.61228e-11	-1.21337e-10																0.0215	-4.05264e-10	-2.97216e-12	-7.80569e-11
		0.02152	-4.05291e-10	-3.61095e-11	-1.21354e-10																0.02152	-4.05291e-10	-3.0105e-12	-7.8077e-11
		0.02154	-4.05317e-10	-3.60985e-11	-1.21369e-10																0.02154	-4.05317e-10	-3.04541e-12	-7.80963e-11
		0.02156	-4.05342e-10	-3.60899e-11	-1.21384e-10																0.02156	-4.05342e-10	-3.07692e-12	-7.81145e-11
		0.02158	-4.05368e-10	-3.60837e-11	-1.21399e-10																0.02158	-4.05368e-10	-3.10506e-12	-7.81314e-11
		0.0216	-4.05392e-10	-3.60803e-11	-1.21412e-10																0.0216	-4.05392e-10	-3.12984e-12	-7.81467e-11
		0.02162	-4.05417e-10	-3.60796e-11	-1.21424e-10																0.02162	-4.05417e-10	-3.15121e-12	-7.81605e-11
		0.02164	-4.0544e-10	-3.60819e-11	-1.21434e-10																0.02164	-4.0544e-10	-3.16915e-12	-7.81724e-11
		0.02166	-4.05463e-10	-3.60872e-11	-1.21444e-10																0.02166	-4.05463e-10	-3.18363e-12	-7.81826e-11
		0.02168	-4.05486e-10	-3.60957e-11	-1.21451e-10																0.02168	-4.05486e-10	-3.19455e-12	-7.81909e-11
		0.0217	-4.05508e-10	-3.61073e-11	-1.21458e-10																0.0217	-4.05508e-10	-3.20181e-12	-7.81974e-11
		0.02172	-4.05528e-10	-3.6122e-11	-1.21462e-10																0.02172	-4.05528e-10	-3.20524e-12	-7.82022e-11
		0.02174	-4.05547e-10	-3.61397e-11	-1.21464e-10																0.02174	-4.05547e-10	-3.20467e-12	-7.82053e-11
		0.02176	-4.05565e-10	-3.61603e-11	-1.21464e-10																0.02176	-4.05565e-10	-3.19991e-12	-7.82066e-11
		0.02178	-4.05582e-10	-3.61838e-11	-1.21463e-10																0.02178	-4.05582e-10	-3.19082e-12	-7.82064e-11
		0.0218	-4.05598e-10	-3.62099e-11	-1.21459e-10																0.0218	-4.05598e-10	-3.17725e-12	-7.82045e-11
		0.02182	-4.05613e-10	-3.62386e-11	-1.21453e-10																0.02182	-4.05613e-10	-3.15907e-12	-7.82011e-11
		0.02184	-4.05626e-10	-3.62696e-11	-1.21444e-10																0.02184	-4.05626e-10	-3.13612e-12	-7.81962e-11
		0.02186	-4.05638e-10	-3.6303e-11	-1.21434e-10																0.02186	-4.05638e-10	-3.10825e-12	-7.81899e-11
		0.02188	-4.0565e-10	-3.63384e-11	-1.21422e-10																0.02188	-4.0565e-10	-3.07531e-12	-7.8182e-11
		0.0219	-4.0566e-10	-3.63757e-11	-1.21408e-10																0.0219	-4.0566e-10	-3.03718e-12	-7.81727e-11
		0.02192	-4.0567e-10	-3.64147e-11	-1.21393e-10																0.02192	-4.0567e-10	-2.99376e-12	-7.81618e-11
		0.02194	-4.05679e-10	-3.6455e-11	-1.21376e-10																0.02194	-4.05679e-10	-2.94502e-12	-7.81494e-11
		0.02196	-4.05687e-10	-3.64965e-11	-1.21358e-10																0.02196	-4.05687e-10	-2.89109e-12	-7.81353e-11
		0.02198	-4.05693e-10	-3.65389e-11	-1.21339e-10																0.02198	-4.05693e-10	-2.8322e-12	-7.81196e-11
		0.022	-4.05699e-10	-3.6582e-11	-1.21319e-10																0.022	-4.05699e-10	-2.76863e-12	-7.81024e-11
		0.02202	-4.05703e-10	-3.66255e-11	-1.21299e-10																0.02202	-4.05703e-10	-2.70071e-12	-7.80837e-11
		0.02204	-4.05705e-10	-3.66693e-11	-1.21277e-10																0.02204	-4.05705e-10	-2.62878e-12	-7.80637e-11
		0.02206	-4.05706e-10	-3.67132e-11	-1.21253e-10																0.02206	-4.05706e-10	-2.55315e-12	-7.80427e-11
		0.02208	-4.05705e-10	-3.6757e-11	-1.21229e-10																0.02208	-4.05705e-10	-2.47409e-12	-7.80208e-11
		0.0221	-4.05702e-10	-3.68004e-11	-1.21205e-10																0.0221	-4.05702e-10	-2.39188e-12	-7.79983e-11
		0.02212	-4.05698e-10	-3.68435e-11	-1.21179e-10																0.02212	-4.05698e-10	-2.30678e-12	-7.79754e-11
		0.02214	-4.05692e-10	-3.68861e-11	-1.21152e-10																0.02214	-4.05692e-10	-2.21907e-12	-7.79521e-11
		0.02216	-4.05685e-10	-3.69281e-11	-1.21125e-10																0.02216	-4.05685e-10	-2.12904e-12	-7.79288e-11
		0.02218	-4.05678e-10	-3.69696e-11	-1.21097e-10																0.02218	-4.05678e-10	-2.03703e-12	-7.79054e-11
		0.0222	-4.05669e-10	-3.70104e-11	-1.21069e-10																0.0222	-4.05669e-10	-1.94335e-12	-7.78822e-11
		0.02222	-4.0566e-10	-3.70504e-11	-1.21041e-10																0.02222	-4.0566e-10	-1.84832e-12	-7.78593e-11
		0.02224	-4.0565e-10	-3.70895e-11	-1.21013e-10																0.02224	-4.0565e-10	-1.75222e-12	-7.78367e-11
		0.02226	-4.0564e-10	-3.71275e-11	-1.20986e-10																0.02226	-4.0564e-10	-1.65535e-12	-7.78146e-11
		0.02228	-4.05629e-10	-3.7164e-11	-1.20959e-10																0.02228	-4.05629e-10	-1.55801e-12	-7.7793e-11
		0.0223	-4.05617e-10	-3.7199e-11	-1.20933e-10																0.0223	-4.05617e-10	-1.46049e-12	-7.77718e-11
		0.02232	-4.05604e-10	-3.72323e-11	-1.20908e-10																0.02232	-4.05604e-10	-1.36306e-12	-7.77512e-11
		0.02234	-4.0559e-10	-3.72638e-11	-1.20884e-10																0.02234	-4.0559e-10	-1.26596e-12	-7.77313e-11
		0.02236	-4.05576e-10	-3.72936e-11	-1.20861e-10																0.02236	-4.05576e-10	-1.16941e-12	-7.77122e-11
		0.02238	-4.05561e-10	-3.73217e-11	-1.20841e-10																0.02238	-4.05561e-10	-1.07362e-12	-7.76942e-11
		0.0224	-4.05545e-10	-3.73482e-11	-1.20822e-10																0.0224	-4.05545e-10	-9.78827e-13	-7.76775e-11
		0.02242	-4.05529e-10	-3.7373e-11	-1.20805e-10																0.02242	-4.05529e-10	-8.85238e-13	-7.76625e-11
		0.02244	-4.05514e-10	-3.73961e-11	-1.2079e-10																0.02244	-4.05514e-10	-7.93086e-13	-7.76492e-11
		0.02246	-4.055e-10	-3.74175e-11	-1.20777e-10																0.02246	-4.055e-10	-7.02613e-13	-7.76377e-11
		0.02248	-4.05485e-10	-3.74371e-11	-1.20766e-10																0.02248	-4.05485e-10	-6.1404e-13	-7.7628e-11
		0.0225	-4.05472e-10	-3.74546e-11	-1.20758e-10																0.0225	-4.05472e-10	-5.27559e-13	-7.762e-11
		0.02252	-4.05459e-10	-3.747e-11	-1.20752e-10																0.02252	-4.05459e-10	-4.43294e-13	-7.76135e-11
		0.02254	-4.05448e-10	-3.74831e-11	-1.20749e-10																0.02254	-4.05448e-10	-3.61304e-13	-7.76084e-11
		0.02256	-4.05439e-10	-3.74937e-11	-1.20747e-10																0.02256	-4.05439e-10	-2.81574e-13	-7.76047e-11
		0.02258	-4.05431e-10	-3.75017e-11	-1.20748e-10																0.02258	-4.05431e-10	-2.03994e-13	-7.76023e-11
		0.0226	-4.05426e-10	-3.75071e-11	-1.20751e-10																0.0226	-4.05426e-10	-1.28398e-13	-7.76012e-11
		0.02262	-4.05422e-10	-3.75097e-11	-1.20755e-10																0.02262	-4.05422e-10	-5.45954e-14	-7.76015e-11
		0.02264	-4.05422e-10	-3.75097e-11	-1.20761e-10																0.02264	-4.05422e-10	1.76122e-14	-7.76032e-11
		0.02266	-4.05424e-10	-3.7507e-11	-1.20769e-10																0.02266	-4.05424e-10	8.83772e-14	-7.76065e-11
		0.02268	-4.0543e-10	-3.75019e-11	-1.20778e-10																0.02268	-4.0543e-10	1.57777e-13	-7.76113e-11
		0.0227	-4.05439e-10	-3.74946e-11	-1.20789e-10																0.0227	-4.05439e-10	2.25798e-13	-7.76176e-11
		0.02272	-4.05451e-10	-3.74851e-11	-1.20801e-10																0.02272	-4.05451e-10	2.92358e-13	-7.76253e-11
		0.02274	-4.05466e-10	-3.74737e-11	-1.20815e-10																0.02274	-4.05466e-10	3.57319e-13	-7.76344e-11
		0.02276	-4.05485e-10	-3.74605e-11	-1.2083e-10																0.02276	-4.05485e-10	4.20499e-13	-7.76445e-11
		0.02278	-4.05506e-10	-3.74458e-11	-1.20846e-10																0.02278	-4.05506e-10	4.81681e-13	-7.76555e-11
		0.0228	-4.05529e-10	-3.74296e-11	-1.20864e-10																0.0228	-4.05529e-10	5.40603e-13	-7.76673e-11
		0.02282	-4.05554e-10	-3.74122e-11	-1.20884e-10																0.02282	-4.05554e-10	5.9697e-13	-7.76797e-11
		0.02284	-4.05582e-10	-3.73935e-11	-1.20905e-10																0.02284	-4.05582e-10	6.50508e-13	-7.76926e-11
		0.02286	-4.05612e-10	-3.73736e-11	-1.20927e-10																0.02286	-4.05612e-10	7.01019e-13	-7.7706e-11
		0.02288	-4.05643e-10	-3.73527e-11	-1.20951e-10																0.02288	-4.05643e-10	7.48364e-13	-7.77198e-11
		0.0229	-4.05677e-10	-3.73309e-11	-1.20976e-10																0.0229	-4.05677e-10	7.92477e-13	-7.77339e-11
		0.02292	-4.05713e-10	-3.73083e-11	-1.21003e-10																0.02292	-4.05713e-10	8.33337e-13	-7.77482e-11
		0.02294	-4.05751e-10	-3.7285e-11	-1.2103e-10																0.02294	-4.05751e-10	8.70951e-13	-7.77626e-11
		0.02296	-4.05791e-10	-3.72611e-11	-1.21059e-10																0.02296	-4.05791e-10	9.05338e-13	-7.77771e-11
		0.02298	-4.05833e-10	-3.72368e-11	-1.21089e-10																0.02298	-4.05833e-10	9.36501e-13	-7.77914e-11
		0.023	-4.05877e-10	-3.72122e-11	-1.2112e-10																0.023	-4.05877e-10	9.64465e-13	-7.78056e-11
		0.02302	-4.05922e-10	-3.71874e-11	-1.21151e-10																0.02302	-4.05922e-10	9.89307e-13	-7.78195e-11
		0.02304	-4.05969e-10	-3.71624e-11	-1.21183e-10																0.02304	-4.05969e-10	1.01107e-12	-7.78332e-11
		0.02306	-4.06018e-10	-3.71373e-11	-1.21216e-10																0.02306	-4.06018e-10	1.02975e-12	-7.78467e-11
		0.02308	-4.06067e-10	-3.71122e-11	-1.21248e-10																0.02308	-4.06067e-10	1.04532e-12	-7.78599e-11
		0.0231	-4.06118e-10	-3.70872e-11	-1.21281e-10																0.0231	-4.06118e-10	1.05774e-12	-7.78727e-11
		0.02312	-4.06169e-10	-3.70623e-11	-1.21315e-10																0.02312	-4.06169e-10	1.06698e-12	-7.78853e-11
		0.02314	-4.06221e-10	-3.70375e-11	-1.21348e-10																0.02314	-4.06221e-10	1.07301e-12	-7.78974e-11
		0.02316	-4.06274e-10	-3.7013e-11	-1.21382e-10																0.02316	-4.06274e-10	1.07586e-12	-7.7909e-11
		0.02318	-4.06326e-10	-3.69885e-11	-1.21416e-10																0.02318	-4.06326e-10	1.0756e-12	-7.79197e-11
		0.0232	-4.0638e-10	-3.69643e-11	-1.2145e-10																0.0232	-4.0638e-10	1.07241e-12	-7.79294e-11
		0.02322	-4.06433e-10	-3.69404e-11	-1.21485e-10																0.02322	-4.06433e-10	1.06647e-12	-7.79377e-11
		0.02324	-4.06486e-10	-3.6917e-11	-1.21519e-10																0.02324	-4.06486e-10	1.05803e-12	-7.79445e-11
		0.02326	-4.06539e-10	-3.68943e-11	-1.21553e-10																0.02326	-4.06539e-10	1.04732e-12	-7.79495e-11
		0.02328	-4.06593e-10	-3.68727e-11	-1.21587e-10																0.02328	-4.06593e-10	1.03452e-12	-7.79525e-11
		0.0233	-4.06645e-10	-3.68524e-11	-1.21621e-10																0.0233	-4.06645e-10	1.01977e-12	-7.79534e-11
		0.02332	-4.06698e-10	-3.68338e-11	-1.21655e-10																0.02332	-4.06698e-10	1.0031e-12	-7.7952e-11
		0.02334	-4.06749e-10	-3.68171e-11	-1.21688e-10																0.02334	-4.06749e-10	9.84543e-13	-7.79485e-11
		0.02336	-4.068e-10	-3.68026e-11	-1.2172e-10																0.02336	-4.068e-10	9.64101e-13	-7.79427e-11
		0.02338	-4.06849e-10	-3.67904e-11	-1.21752e-10																0.02338	-4.06849e-10	9.41788e-13	-7.79348e-11
		0.0234	-4.06897e-10	-3.67804e-11	-1.21784e-10																0.0234	-4.06897e-10	9.17652e-13	-7.79248e-11
		0.02342	-4.06943e-10	-3.67728e-11	-1.21816e-10																0.02342	-4.06943e-10	8.91778e-13	-7.79128e-11
		0.02344	-4.06987e-10	-3.67674e-11	-1.21846e-10																0.02344	-4.06987e-10	8.64278e-13	-7.78988e-11
		0.02346	-4.0703e-10	-3.67642e-11	-1.21877e-10																0.02346	-4.0703e-10	8.35261e-13	-7.78829e-11
		0.02348	-4.07071e-10	-3.67631e-11	-1.21906e-10																0.02348	-4.07071e-10	8.04832e-13	-7.78651e-11
		0.0235	-4.0711e-10	-3.67641e-11	-1.21935e-10																0.0235	-4.0711e-10	7.73151e-13	-7.78457e-11
		0.02352	-4.07149e-10	-3.6767e-11	-1.21963e-10																0.02352	-4.07149e-10	7.40448e-13	-7.78248e-11
		0.02354	-4.07186e-10	-3.6772e-11	-1.2199e-10																0.02354	-4.07186e-10	7.06956e-13	-7.78028e-11
		0.02356	-4.07222e-10	-3.67788e-11	-1.22016e-10																0.02356	-4.07222e-10	6.7287e-13	-7.77797e-11
		0.02358	-4.07257e-10	-3.67875e-11	-1.22041e-10																0.02358	-4.07257e-10	6.38329e-13	-7.7756e-11
		0.0236	-4.07291e-10	-3.67979e-11	-1.22065e-10																0.0236	-4.07291e-10	6.034e-13	-7.77318e-11
		0.02362	-4.07324e-10	-3.68096e-11	-1.22088e-10																0.02362	-4.07324e-10	5.68068e-13	-7.77073e-11
		0.02364	-4.07357e-10	-3.68223e-11	-1.2211e-10																0.02364	-4.07357e-10	5.32272e-13	-7.76827e-11
		0.02366	-4.07388e-10	-3.68359e-11	-1.22131e-10																0.02366	-4.07388e-10	4.95937e-13	-7.76584e-11
		0.02368	-4.07418e-10	-3.68503e-11	-1.22152e-10																0.02368	-4.07418e-10	4.58989e-13	-7.76344e-11
		0.0237	-4.07448e-10	-3.68654e-11	-1.22171e-10																0.0237	-4.07448e-10	4.21352e-13	-7.76112e-11
		0.02372	-4.07477e-10	-3.68812e-11	-1.22188e-10																0.02372	-4.07477e-10	3.82971e-13	-7.75888e-11
		0.02374	-4.07504e-10	-3.68977e-11	-1.22205e-10																0.02374	-4.07504e-10	3.43851e-13	-7.75675e-11
		0.02376	-4.0753e-10	-3.69152e-11	-1.2222e-10																0.02376	-4.0753e-10	3.04058e-13	-7.75475e-11
		0.02378	-4.07554e-10	-3.69334e-11	-1.22234e-10																0.02378	-4.07554e-10	2.63725e-13	-7.75289e-11
		0.0238	-4.07577e-10	-3.69525e-11	-1.22247e-10																0.0238	-4.07577e-10	2.23015e-13	-7.75116e-11
		0.02382	-4.07597e-10	-3.69724e-11	-1.22258e-10																0.02382	-4.07597e-10	1.82106e-13	-7.74957e-11
		0.02384	-4.07615e-10	-3.69929e-11	-1.22268e-10																0.02384	-4.07615e-10	1.41178e-13	-7.74812e-11
		0.02386	-4.0763e-10	-3.7014e-11	-1.22276e-10																0.02386	-4.0763e-10	1.00419e-13	-7.74683e-11
		0.02388	-4.07643e-10	-3.70356e-11	-1.22283e-10																0.02388	-4.07643e-10	6.00326e-14	-7.74568e-11
		0.0239	-4.07654e-10	-3.70576e-11	-1.22288e-10																0.0239	-4.07654e-10	2.02069e-14	-7.74469e-11
		0.02392	-4.07661e-10	-3.708e-11	-1.22291e-10																0.02392	-4.07661e-10	-1.89037e-14	-7.74387e-11
		0.02394	-4.07667e-10	-3.71026e-11	-1.22292e-10																0.02394	-4.07667e-10	-5.7153e-14	-7.74323e-11
		0.02396	-4.0767e-10	-3.71255e-11	-1.22292e-10																0.02396	-4.0767e-10	-9.43529e-14	-7.74277e-11
		0.02398	-4.07671e-10	-3.71483e-11	-1.2229e-10																0.02398	-4.07671e-10	-1.30292e-13	-7.74249e-11
		0.024	-4.07671e-10	-3.71709e-11	-1.22286e-10																0.024	-4.07671e-10	-1.64766e-13	-7.74241e-11
		0.02402	-4.07669e-10	-3.71931e-11	-1.22281e-10																0.02402	-4.07669e-10	-1.97571e-13	-7.74252e-11
		0.02404	-4.07665e-10	-3.72145e-11	-1.22275e-10																0.02404	-4.07665e-10	-2.28529e-13	-7.74282e-11
		0.02406	-4.0766e-10	-3.72349e-11	-1.22267e-10																0.02406	-4.0766e-10	-2.57514e-13	-7.74331e-11
		0.02408	-4.07654e-10	-3.72542e-11	-1.22258e-10																0.02408	-4.07654e-10	-2.84444e-13	-7.74398e-11
		0.0241	-4.07647e-10	-3.7272e-11	-1.22248e-10																0.0241	-4.07647e-10	-3.09291e-13	-7.74483e-11
		0.02412	-4.0764e-10	-3.72884e-11	-1.22236e-10																0.02412	-4.0764e-10	-3.32061e-13	-7.74588e-11
		0.02414	-4.07632e-10	-3.73032e-11	-1.22224e-10																0.02414	-4.07632e-10	-3.52832e-13	-7.74711e-11
		0.02416	-4.07623e-10	-3.73162e-11	-1.22211e-10																0.02416	-4.07623e-10	-3.71742e-13	-7.74854e-11
		0.02418	-4.07614e-10	-3.73273e-11	-1.22198e-10																0.02418	-4.07614e-10	-3.88988e-13	-7.75016e-11
		0.0242	-4.07605e-10	-3.73364e-11	-1.22183e-10																0.0242	-4.07605e-10	-4.04838e-13	-7.75195e-11
		0.02422	-4.07596e-10	-3.73434e-11	-1.22169e-10																0.02422	-4.07596e-10	-4.19565e-13	-7.75392e-11
		0.02424	-4.07587e-10	-3.73481e-11	-1.22154e-10																0.02424	-4.07587e-10	-4.33431e-13	-7.75604e-11
		0.02426	-4.07579e-10	-3.73504e-11	-1.22139e-10																0.02426	-4.07579e-10	-4.46678e-13	-7.7583e-11
		0.02428	-4.07571e-10	-3.73502e-11	-1.22124e-10																0.02428	-4.07571e-10	-4.59482e-13	-7.7607e-11
		0.0243	-4.07564e-10	-3.73474e-11	-1.22109e-10																0.0243	-4.07564e-10	-4.71948e-13	-7.76322e-11
		0.02432	-4.07558e-10	-3.7342e-11	-1.22094e-10																0.02432	-4.07558e-10	-4.84113e-13	-7.76586e-11
		0.02434	-4.07554e-10	-3.7334e-11	-1.2208e-10																0.02434	-4.07554e-10	-4.9597e-13	-7.76859e-11
		0.02436	-4.07552e-10	-3.73232e-11	-1.22067e-10																0.02436	-4.07552e-10	-5.07457e-13	-7.7714e-11
		0.02438	-4.07552e-10	-3.73098e-11	-1.22054e-10																0.02438	-4.07552e-10	-5.18473e-13	-7.77427e-11
		0.0244	-4.07554e-10	-3.7294e-11	-1.22043e-10																0.0244	-4.07554e-10	-5.28932e-13	-7.77716e-11
		0.02442	-4.07558e-10	-3.72757e-11	-1.22032e-10																0.02442	-4.07558e-10	-5.38795e-13	-7.78006e-11
		0.02444	-4.07564e-10	-3.72554e-11	-1.22021e-10																0.02444	-4.07564e-10	-5.4805e-13	-7.78294e-11
		0.02446	-4.07572e-10	-3.72332e-11	-1.22011e-10																0.02446	-4.07572e-10	-5.5672e-13	-7.7858e-11
		0.02448	-4.07583e-10	-3.72093e-11	-1.22002e-10																0.02448	-4.07583e-10	-5.64872e-13	-7.78861e-11
		0.0245	-4.07596e-10	-3.71841e-11	-1.21994e-10																0.0245	-4.07596e-10	-5.72604e-13	-7.79137e-11
		0.02452	-4.07611e-10	-3.71577e-11	-1.21987e-10																0.02452	-4.07611e-10	-5.80074e-13	-7.79407e-11
		0.02454	-4.07628e-10	-3.71302e-11	-1.21981e-10																0.02454	-4.07628e-10	-5.87493e-13	-7.7967e-11
		0.02456	-4.07648e-10	-3.71019e-11	-1.21976e-10																0.02456	-4.07648e-10	-5.95123e-13	-7.79924e-11
		0.02458	-4.0767e-10	-3.70729e-11	-1.21972e-10																0.02458	-4.0767e-10	-6.03277e-13	-7.80167e-11
		0.0246	-4.07694e-10	-3.70432e-11	-1.2197e-10																0.0246	-4.07694e-10	-6.12294e-13	-7.80399e-11
		0.02462	-4.0772e-10	-3.70131e-11	-1.2197e-10																0.02462	-4.0772e-10	-6.22526e-13	-7.80617e-11
		0.02464	-4.07748e-10	-3.69826e-11	-1.21971e-10																0.02464	-4.07748e-10	-6.34289e-13	-7.80821e-11
		0.02466	-4.07778e-10	-3.69519e-11	-1.21975e-10																0.02466	-4.07778e-10	-6.47819e-13	-7.81008e-11
		0.02468	-4.0781e-10	-3.69211e-11	-1.21981e-10																0.02468	-4.0781e-10	-6.63269e-13	-7.81179e-11
		0.0247	-4.07844e-10	-3.68902e-11	-1.21988e-10																0.0247	-4.07844e-10	-6.80702e-13	-7.81331e-11
		0.02472	-4.07879e-10	-3.68592e-11	-1.21998e-10																0.02472	-4.07879e-10	-7.00116e-13	-7.81465e-11
		0.02474	-4.07916e-10	-3.68284e-11	-1.22009e-10																0.02474	-4.07916e-10	-7.21492e-13	-7.8158e-11
		0.02476	-4.07953e-10	-3.67977e-11	-1.22022e-10																0.02476	-4.07953e-10	-7.44816e-13	-7.81678e-11
		0.02478	-4.07991e-10	-3.67672e-11	-1.22037e-10																0.02478	-4.07991e-10	-7.70074e-13	-7.81759e-11
		0.0248	-4.0803e-10	-3.6737e-11	-1.22053e-10																0.0248	-4.0803e-10	-7.97253e-13	-7.81824e-11
		0.02482	-4.08069e-10	-3.67071e-11	-1.22071e-10																0.02482	-4.08069e-10	-8.26331e-13	-7.81875e-11
		0.02484	-4.08109e-10	-3.66777e-11	-1.2209e-10																0.02484	-4.08109e-10	-8.57277e-13	-7.81913e-11
		0.02486	-4.08148e-10	-3.66486e-11	-1.2211e-10																0.02486	-4.08148e-10	-8.90042e-13	-7.81938e-11
		0.02488	-4.08187e-10	-3.66202e-11	-1.22131e-10																0.02488	-4.08187e-10	-9.24608e-13	-7.81952e-11
		0.0249	-4.08226e-10	-3.65923e-11	-1.22153e-10																0.0249	-4.08226e-10	-9.60982e-13	-7.81956e-11
		0.02492	-4.08264e-10	-3.65651e-11	-1.22176e-10																0.02492	-4.08264e-10	-9.99159e-13	-7.8195e-11
		0.02494	-4.08302e-10	-3.65386e-11	-1.22199e-10																0.02494	-4.08302e-10	-1.03913e-12	-7.81937e-11
		0.02496	-4.08339e-10	-3.6513e-11	-1.22223e-10																0.02496	-4.08339e-10	-1.08089e-12	-7.81917e-11
		0.02498	-4.08376e-10	-3.64883e-11	-1.22248e-10																0.02498	-4.08376e-10	-1.12437e-12	-7.81894e-11
		0.025	-4.08412e-10	-3.64648e-11	-1.22273e-10																0.025	-4.08412e-10	-1.16952e-12	-7.81869e-11
		0.02502	-4.08446e-10	-3.64425e-11	-1.22299e-10																0.02502	-4.08446e-10	-1.21626e-12	-7.81843e-11
		0.02504	-4.0848e-10	-3.64215e-11	-1.22324e-10																0.02504	-4.0848e-10	-1.26445e-12	-7.81819e-11
		0.02506	-4.08512e-10	-3.6402e-11	-1.2235e-10																0.02506	-4.08512e-10	-1.31392e-12	-7.81796e-11
		0.02508	-4.08543e-10	-3.63839e-11	-1.22376e-10																0.02508	-4.08543e-10	-1.36449e-12	-7.81775e-11
		0.0251	-4.08571e-10	-3.63669e-11	-1.22401e-10																0.0251	-4.08571e-10	-1.41599e-12	-7.81758e-11
		0.02512	-4.08597e-10	-3.6351e-11	-1.22425e-10																0.02512	-4.08597e-10	-1.46825e-12	-7.81745e-11
		0.02514	-4.08621e-10	-3.63361e-11	-1.22449e-10																0.02514	-4.08621e-10	-1.52118e-12	-7.81738e-11
		0.02516	-4.08642e-10	-3.6322e-11	-1.22472e-10																0.02516	-4.08642e-10	-1.5747e-12	-7.81737e-11
		0.02518	-4.08661e-10	-3.63088e-11	-1.22493e-10																0.02518	-4.08661e-10	-1.6287e-12	-7.81746e-11
		0.0252	-4.08676e-10	-3.62965e-11	-1.22513e-10																0.0252	-4.08676e-10	-1.68305e-12	-7.81763e-11
		0.02522	-4.0869e-10	-3.6285e-11	-1.22532e-10																0.02522	-4.0869e-10	-1.73757e-12	-7.81792e-11
		0.02524	-4.08701e-10	-3.62743e-11	-1.22548e-10																0.02524	-4.08701e-10	-1.79205e-12	-7.81834e-11
		0.02526	-4.08709e-10	-3.62645e-11	-1.22563e-10																0.02526	-4.08709e-10	-1.84626e-12	-7.81889e-11
		0.02528	-4.08715e-10	-3.62553e-11	-1.22576e-10																0.02528	-4.08715e-10	-1.89995e-12	-7.81959e-11
		0.0253	-4.08718e-10	-3.62468e-11	-1.22587e-10																0.0253	-4.08718e-10	-1.9528e-12	-7.82045e-11
		0.02532	-4.0872e-10	-3.62387e-11	-1.22595e-10																0.02532	-4.0872e-10	-2.00454e-12	-7.82145e-11
		0.02534	-4.0872e-10	-3.62309e-11	-1.22602e-10																0.02534	-4.0872e-10	-2.05494e-12	-7.82261e-11
		0.02536	-4.08718e-10	-3.62234e-11	-1.22606e-10																0.02536	-4.08718e-10	-2.10381e-12	-7.82392e-11
		0.02538	-4.08714e-10	-3.62158e-11	-1.22608e-10																0.02538	-4.08714e-10	-2.15099e-12	-7.82538e-11
		0.0254	-4.0871e-10	-3.6208e-11	-1.22608e-10																0.0254	-4.0871e-10	-2.1963e-12	-7.82699e-11
		0.02542	-4.08704e-10	-3.62e-11	-1.22605e-10																0.02542	-4.08704e-10	-2.23952e-12	-7.82873e-11
		0.02544	-4.08697e-10	-3.61916e-11	-1.22601e-10																0.02544	-4.08697e-10	-2.28042e-12	-7.8306e-11
		0.02546	-4.08688e-10	-3.61827e-11	-1.22596e-10																0.02546	-4.08688e-10	-2.31878e-12	-7.8326e-11
		0.02548	-4.08678e-10	-3.61733e-11	-1.22589e-10																0.02548	-4.08678e-10	-2.35439e-12	-7.8347e-11
		0.0255	-4.08667e-10	-3.61634e-11	-1.2258e-10																0.0255	-4.08667e-10	-2.38708e-12	-7.8369e-11
		0.02552	-4.08654e-10	-3.6153e-11	-1.22571e-10																0.02552	-4.08654e-10	-2.41675e-12	-7.83919e-11
		0.02554	-4.0864e-10	-3.61422e-11	-1.2256e-10																0.02554	-4.0864e-10	-2.44328e-12	-7.84155e-11
		0.02556	-4.08623e-10	-3.6131e-11	-1.22549e-10																0.02556	-4.08623e-10	-2.46652e-12	-7.84399e-11
		0.02558	-4.08606e-10	-3.61197e-11	-1.22536e-10																0.02558	-4.08606e-10	-2.48622e-12	-7.84646e-11
		0.0256	-4.08587e-10	-3.61082e-11	-1.22521e-10																0.0256	-4.08587e-10	-2.50207e-12	-7.84896e-11
		0.02562	-4.08566e-10	-3.60966e-11	-1.22505e-10																0.02562	-4.08566e-10	-2.51371e-12	-7.85147e-11
		0.02564	-4.08544e-10	-3.60851e-11	-1.22488e-10																0.02564	-4.08544e-10	-2.52076e-12	-7.85395e-11
		0.02566	-4.0852e-10	-3.60735e-11	-1.2247e-10																0.02566	-4.0852e-10	-2.5229e-12	-7.85638e-11
		0.02568	-4.08496e-10	-3.60617e-11	-1.22451e-10																0.02568	-4.08496e-10	-2.51983e-12	-7.85872e-11
		0.0257	-4.0847e-10	-3.60496e-11	-1.2243e-10																0.0257	-4.0847e-10	-2.51136e-12	-7.86093e-11
		0.02572	-4.08443e-10	-3.6037e-11	-1.22409e-10																0.02572	-4.08443e-10	-2.49742e-12	-7.86302e-11
		0.02574	-4.08416e-10	-3.60236e-11	-1.22388e-10																0.02574	-4.08416e-10	-2.47802e-12	-7.86495e-11
		0.02576	-4.08389e-10	-3.60093e-11	-1.22367e-10																0.02576	-4.08389e-10	-2.45329e-12	-7.86673e-11
		0.02578	-4.08361e-10	-3.59938e-11	-1.22345e-10																0.02578	-4.08361e-10	-2.42344e-12	-7.86837e-11
		0.0258	-4.08334e-10	-3.59772e-11	-1.22323e-10																0.0258	-4.08334e-10	-2.38877e-12	-7.86986e-11
		0.02582	-4.08308e-10	-3.59592e-11	-1.22302e-10																0.02582	-4.08308e-10	-2.34968e-12	-7.87123e-11
		0.02584	-4.08282e-10	-3.59401e-11	-1.22281e-10																0.02584	-4.08282e-10	-2.30662e-12	-7.87248e-11
		0.02586	-4.08257e-10	-3.59196e-11	-1.2226e-10																0.02586	-4.08257e-10	-2.26015e-12	-7.8736e-11
		0.02588	-4.08234e-10	-3.5898e-11	-1.2224e-10																0.02588	-4.08234e-10	-2.21084e-12	-7.87461e-11
		0.0259	-4.08212e-10	-3.5875e-11	-1.2222e-10																0.0259	-4.08212e-10	-2.15923e-12	-7.87551e-11
		0.02592	-4.08193e-10	-3.58505e-11	-1.22201e-10																0.02592	-4.08193e-10	-2.10581e-12	-7.87626e-11
		0.02594	-4.08175e-10	-3.58247e-11	-1.22183e-10																0.02594	-4.08175e-10	-2.05098e-12	-7.87689e-11
		0.02596	-4.08159e-10	-3.57975e-11	-1.22165e-10																0.02596	-4.08159e-10	-1.99512e-12	-7.87737e-11
		0.02598	-4.08146e-10	-3.57689e-11	-1.22148e-10																0.02598	-4.08146e-10	-1.93859e-12	-7.8777e-11
		0.026	-4.08135e-10	-3.5739e-11	-1.22132e-10																0.026	-4.08135e-10	-1.88174e-12	-7.87789e-11
		0.02602	-4.08126e-10	-3.5708e-11	-1.22117e-10																0.02602	-4.08126e-10	-1.82495e-12	-7.87794e-11
		0.02604	-4.08119e-10	-3.56761e-11	-1.22104e-10																0.02604	-4.08119e-10	-1.76862e-12	-7.87782e-11
		0.02606	-4.08114e-10	-3.56434e-11	-1.22092e-10																0.02606	-4.08114e-10	-1.71316e-12	-7.87754e-11
		0.02608	-4.08113e-10	-3.56102e-11	-1.22081e-10																0.02608	-4.08113e-10	-1.65903e-12	-7.87709e-11
		0.0261	-4.08113e-10	-3.55763e-11	-1.22072e-10																0.0261	-4.08113e-10	-1.60671e-12	-7.87645e-11
		0.02612	-4.08116e-10	-3.55419e-11	-1.22065e-10																0.02612	-4.08116e-10	-1.55676e-12	-7.87563e-11
		0.02614	-4.0812e-10	-3.5507e-11	-1.2206e-10																0.02614	-4.0812e-10	-1.50971e-12	-7.8746e-11
		0.02616	-4.08127e-10	-3.54715e-11	-1.22057e-10																0.02616	-4.08127e-10	-1.46602e-12	-7.87335e-11
		0.02618	-4.08136e-10	-3.54355e-11	-1.22057e-10																0.02618	-4.08136e-10	-1.42609e-12	-7.87189e-11
		0.0262	-4.08146e-10	-3.53989e-11	-1.2206e-10																0.0262	-4.08146e-10	-1.39016e-12	-7.8702e-11
		0.02622	-4.08159e-10	-3.53621e-11	-1.22065e-10																0.02622	-4.08159e-10	-1.35841e-12	-7.86832e-11
		0.02624	-4.08172e-10	-3.53253e-11	-1.22073e-10																0.02624	-4.08172e-10	-1.33094e-12	-7.86623e-11
		0.02626	-4.08187e-10	-3.52888e-11	-1.22083e-10																0.02626	-4.08187e-10	-1.3078e-12	-7.86395e-11
		0.02628	-4.08204e-10	-3.52528e-11	-1.22096e-10																0.02628	-4.08204e-10	-1.289e-12	-7.86151e-11
		0.0263	-4.08222e-10	-3.52178e-11	-1.2211e-10																0.0263	-4.08222e-10	-1.27457e-12	-7.85892e-11
		0.02632	-4.08242e-10	-3.51837e-11	-1.22127e-10																0.02632	-4.08242e-10	-1.26451e-12	-7.85619e-11
		0.02634	-4.08262e-10	-3.51509e-11	-1.22145e-10																0.02634	-4.08262e-10	-1.25877e-12	-7.85334e-11
		0.02636	-4.08284e-10	-3.51193e-11	-1.22165e-10																0.02636	-4.08284e-10	-1.25736e-12	-7.85039e-11
		0.02638	-4.08306e-10	-3.5089e-11	-1.22186e-10																0.02638	-4.08306e-10	-1.26032e-12	-7.84736e-11
		0.0264	-4.08329e-10	-3.50598e-11	-1.2221e-10																0.0264	-4.08329e-10	-1.26771e-12	-7.84426e-11
		0.02642	-4.08353e-10	-3.50317e-11	-1.22235e-10																0.02642	-4.08353e-10	-1.27965e-12	-7.84109e-11
		0.02644	-4.08376e-10	-3.50045e-11	-1.22261e-10																0.02644	-4.08376e-10	-1.29629e-12	-7.83788e-11
		0.02646	-4.08399e-10	-3.49781e-11	-1.22289e-10																0.02646	-4.08399e-10	-1.31776e-12	-7.83463e-11
		0.02648	-4.08423e-10	-3.49526e-11	-1.22319e-10																0.02648	-4.08423e-10	-1.34411e-12	-7.83135e-11
		0.0265	-4.08446e-10	-3.49277e-11	-1.22351e-10																0.0265	-4.08446e-10	-1.37528e-12	-7.82807e-11
		0.02652	-4.08468e-10	-3.49038e-11	-1.22383e-10																0.02652	-4.08468e-10	-1.41108e-12	-7.82479e-11
		0.02654	-4.0849e-10	-3.48808e-11	-1.22417e-10																0.02654	-4.0849e-10	-1.45122e-12	-7.82153e-11
		0.02656	-4.0851e-10	-3.48588e-11	-1.22452e-10																0.02656	-4.0851e-10	-1.49532e-12	-7.81829e-11
		0.02658	-4.0853e-10	-3.48382e-11	-1.22488e-10																0.02658	-4.0853e-10	-1.54296e-12	-7.81512e-11
		0.0266	-4.08548e-10	-3.48188e-11	-1.22525e-10																0.0266	-4.08548e-10	-1.5937e-12	-7.81202e-11
		0.02662	-4.08566e-10	-3.48008e-11	-1.22562e-10																0.02662	-4.08566e-10	-1.64715e-12	-7.809e-11
		0.02664	-4.08581e-10	-3.47841e-11	-1.226e-10																0.02664	-4.08581e-10	-1.70292e-12	-7.80608e-11
		0.02666	-4.08595e-10	-3.47687e-11	-1.22637e-10																0.02666	-4.08595e-10	-1.76074e-12	-7.80327e-11
		0.02668	-4.08608e-10	-3.47546e-11	-1.22675e-10																0.02668	-4.08608e-10	-1.82028e-12	-7.80057e-11
		0.0267	-4.08619e-10	-3.47418e-11	-1.22713e-10																0.0267	-4.08619e-10	-1.88124e-12	-7.79801e-11
		0.02672	-4.08629e-10	-3.47304e-11	-1.2275e-10																0.02672	-4.08629e-10	-1.94326e-12	-7.79559e-11
		0.02674	-4.08638e-10	-3.47203e-11	-1.22786e-10																0.02674	-4.08638e-10	-2.00596e-12	-7.79333e-11
		0.02676	-4.08646e-10	-3.47117e-11	-1.22822e-10																0.02676	-4.08646e-10	-2.06889e-12	-7.79124e-11
		0.02678	-4.08653e-10	-3.47047e-11	-1.22858e-10																0.02678	-4.08653e-10	-2.1316e-12	-7.78933e-11
		0.0268	-4.08661e-10	-3.46993e-11	-1.22893e-10																0.0268	-4.08661e-10	-2.1936e-12	-7.78761e-11
		0.02682	-4.08667e-10	-3.46957e-11	-1.22927e-10																0.02682	-4.08667e-10	-2.25439e-12	-7.78608e-11
		0.02684	-4.08674e-10	-3.46938e-11	-1.2296e-10																0.02684	-4.08674e-10	-2.31343e-12	-7.78473e-11
		0.02686	-4.08681e-10	-3.46939e-11	-1.22991e-10																0.02686	-4.08681e-10	-2.37024e-12	-7.78358e-11
		0.02688	-4.08687e-10	-3.4696e-11	-1.23021e-10																0.02688	-4.08687e-10	-2.42431e-12	-7.7826e-11
		0.0269	-4.08693e-10	-3.46999e-11	-1.23049e-10																0.0269	-4.08693e-10	-2.47516e-12	-7.78179e-11
		0.02692	-4.08699e-10	-3.47057e-11	-1.23075e-10																0.02692	-4.08699e-10	-2.52236e-12	-7.78115e-11
		0.02694	-4.08704e-10	-3.47129e-11	-1.23098e-10																0.02694	-4.08704e-10	-2.56554e-12	-7.78067e-11
		0.02696	-4.08709e-10	-3.47216e-11	-1.23119e-10																0.02696	-4.08709e-10	-2.60446e-12	-7.78035e-11
		0.02698	-4.08713e-10	-3.47313e-11	-1.23137e-10																0.02698	-4.08713e-10	-2.63897e-12	-7.78017e-11
		0.027	-4.08717e-10	-3.47418e-11	-1.23152e-10																0.027	-4.08717e-10	-2.66912e-12	-7.78014e-11
		0.02702	-4.0872e-10	-3.47529e-11	-1.23164e-10																0.02702	-4.0872e-10	-2.69501e-12	-7.78024e-11
		0.02704	-4.08722e-10	-3.47644e-11	-1.23173e-10																0.02704	-4.08722e-10	-2.71684e-12	-7.78046e-11
		0.02706	-4.08724e-10	-3.47762e-11	-1.23179e-10																0.02706	-4.08724e-10	-2.73474e-12	-7.7808e-11
		0.02708	-4.08726e-10	-3.47882e-11	-1.23183e-10																0.02708	-4.08726e-10	-2.74877e-12	-7.78124e-11
		0.0271	-4.08728e-10	-3.48003e-11	-1.23184e-10																0.0271	-4.08728e-10	-2.75894e-12	-7.78179e-11
		0.02712	-4.08731e-10	-3.48126e-11	-1.23183e-10																0.02712	-4.08731e-10	-2.7652e-12	-7.78243e-11
		0.02714	-4.08733e-10	-3.48249e-11	-1.23179e-10																0.02714	-4.08733e-10	-2.7675e-12	-7.78316e-11
		0.02716	-4.08736e-10	-3.48372e-11	-1.23173e-10																0.02716	-4.08736e-10	-2.76585e-12	-7.78396e-11
		0.02718	-4.08739e-10	-3.48494e-11	-1.23164e-10																0.02718	-4.08739e-10	-2.7603e-12	-7.78483e-11
		0.0272	-4.08742e-10	-3.48615e-11	-1.23154e-10																0.0272	-4.08742e-10	-2.75103e-12	-7.78575e-11
		0.02722	-4.08746e-10	-3.48733e-11	-1.23142e-10																0.02722	-4.08746e-10	-2.73825e-12	-7.78671e-11
		0.02724	-4.08749e-10	-3.48849e-11	-1.23127e-10																0.02724	-4.08749e-10	-2.72224e-12	-7.78772e-11
		0.02726	-4.08752e-10	-3.48961e-11	-1.23111e-10																0.02726	-4.08752e-10	-2.70331e-12	-7.78877e-11
		0.02728	-4.08754e-10	-3.49067e-11	-1.23093e-10																0.02728	-4.08754e-10	-2.68177e-12	-7.78986e-11
		0.0273	-4.08756e-10	-3.49167e-11	-1.23074e-10																0.0273	-4.08756e-10	-2.65792e-12	-7.79099e-11
		0.02732	-4.08758e-10	-3.4926e-11	-1.23053e-10																0.02732	-4.08758e-10	-2.63198e-12	-7.79215e-11
		0.02734	-4.08759e-10	-3.49347e-11	-1.23031e-10																0.02734	-4.08759e-10	-2.60408e-12	-7.79335e-11
		0.02736	-4.08759e-10	-3.49428e-11	-1.23008e-10																0.02736	-4.08759e-10	-2.57429e-12	-7.79458e-11
		0.02738	-4.08758e-10	-3.49504e-11	-1.22983e-10																0.02738	-4.08758e-10	-2.54269e-12	-7.79585e-11
		0.0274	-4.08757e-10	-3.49577e-11	-1.22957e-10																0.0274	-4.08757e-10	-2.50937e-12	-7.79714e-11
		0.02742	-4.08754e-10	-3.49648e-11	-1.2293e-10																0.02742	-4.08754e-10	-2.47452e-12	-7.79845e-11
		0.02744	-4.0875e-10	-3.49718e-11	-1.22902e-10																0.02744	-4.0875e-10	-2.43844e-12	-7.79978e-11
		0.02746	-4.08745e-10	-3.49787e-11	-1.22873e-10																0.02746	-4.08745e-10	-2.40147e-12	-7.8011e-11
		0.02748	-4.08738e-10	-3.49853e-11	-1.22844e-10																0.02748	-4.08738e-10	-2.36399e-12	-7.80243e-11
		0.0275	-4.08731e-10	-3.49917e-11	-1.22813e-10																0.0275	-4.08731e-10	-2.32633e-12	-7.80373e-11
		0.02752	-4.08722e-10	-3.49976e-11	-1.22782e-10																0.02752	-4.08722e-10	-2.28882e-12	-7.80499e-11
		0.02754	-4.08712e-10	-3.50028e-11	-1.2275e-10																0.02754	-4.08712e-10	-2.25179e-12	-7.8062e-11
		0.02756	-4.08701e-10	-3.50071e-11	-1.22718e-10																0.02756	-4.08701e-10	-2.21557e-12	-7.80734e-11
		0.02758	-4.08689e-10	-3.50103e-11	-1.22686e-10																0.02758	-4.08689e-10	-2.18055e-12	-7.80841e-11
		0.0276	-4.08676e-10	-3.50123e-11	-1.22655e-10																0.0276	-4.08676e-10	-2.14712e-12	-7.8094e-11
		0.02762	-4.08662e-10	-3.50129e-11	-1.22624e-10																0.02762	-4.08662e-10	-2.11571e-12	-7.81034e-11
		0.02764	-4.08647e-10	-3.5012e-11	-1.22594e-10																0.02764	-4.08647e-10	-2.08668e-12	-7.81124e-11
		0.02766	-4.08632e-10	-3.50096e-11	-1.22566e-10																0.02766	-4.08632e-10	-2.06041e-12	-7.81211e-11
		0.02768	-4.08617e-10	-3.50057e-11	-1.22538e-10																0.02768	-4.08617e-10	-2.0372e-12	-7.81297e-11
		0.0277	-4.08601e-10	-3.50003e-11	-1.22513e-10																0.0277	-4.08601e-10	-2.01728e-12	-7.81381e-11
		0.02772	-4.08585e-10	-3.49934e-11	-1.22488e-10																0.02772	-4.08585e-10	-2.00083e-12	-7.81466e-11
		0.02774	-4.08569e-10	-3.49852e-11	-1.22466e-10																0.02774	-4.08569e-10	-1.98792e-12	-7.81549e-11
		0.02776	-4.08553e-10	-3.49756e-11	-1.22445e-10																0.02776	-4.08553e-10	-1.97857e-12	-7.8163e-11
		0.02778	-4.08536e-10	-3.49647e-11	-1.22426e-10																0.02778	-4.08536e-10	-1.97273e-12	-7.81707e-11
		0.0278	-4.08519e-10	-3.49526e-11	-1.22409e-10																0.0278	-4.08519e-10	-1.97031e-12	-7.81781e-11
		0.02782	-4.08502e-10	-3.49394e-11	-1.22394e-10																0.02782	-4.08502e-10	-1.97109e-12	-7.8185e-11
		0.02784	-4.08485e-10	-3.4925e-11	-1.22381e-10																0.02784	-4.08485e-10	-1.97482e-12	-7.81913e-11
		0.02786	-4.08468e-10	-3.49097e-11	-1.22371e-10																0.02786	-4.08468e-10	-1.98114e-12	-7.81971e-11
		0.02788	-4.0845e-10	-3.48935e-11	-1.22363e-10																0.02788	-4.0845e-10	-1.98971e-12	-7.82022e-11
		0.0279	-4.08432e-10	-3.48763e-11	-1.22357e-10																0.0279	-4.08432e-10	-2.00012e-12	-7.82067e-11
		0.02792	-4.08414e-10	-3.48585e-11	-1.22354e-10																0.02792	-4.08414e-10	-2.01202e-12	-7.82107e-11
		0.02794	-4.08396e-10	-3.48401e-11	-1.22353e-10																0.02794	-4.08396e-10	-2.02508e-12	-7.82143e-11
		0.02796	-4.08378e-10	-3.48212e-11	-1.22354e-10																0.02796	-4.08378e-10	-2.03904e-12	-7.82175e-11
		0.02798	-4.0836e-10	-3.4802e-11	-1.22357e-10																0.02798	-4.0836e-10	-2.05367e-12	-7.82205e-11
		0.028	-4.08342e-10	-3.47826e-11	-1.22363e-10																0.028	-4.08342e-10	-2.06876e-12	-7.82235e-11
		0.02802	-4.08325e-10	-3.47629e-11	-1.2237e-10																0.02802	-4.08325e-10	-2.08408e-12	-7.82267e-11
		0.02804	-4.08308e-10	-3.47433e-11	-1.22379e-10																0.02804	-4.08308e-10	-2.09941e-12	-7.82302e-11
		0.02806	-4.08291e-10	-3.47238e-11	-1.22389e-10																0.02806	-4.08291e-10	-2.11452e-12	-7.82343e-11
		0.02808	-4.08274e-10	-3.47045e-11	-1.22401e-10																0.02808	-4.08274e-10	-2.12917e-12	-7.82392e-11
		0.0281	-4.08258e-10	-3.46855e-11	-1.22414e-10																0.0281	-4.08258e-10	-2.14305e-12	-7.82451e-11
		0.02812	-4.08242e-10	-3.46671e-11	-1.22429e-10																0.02812	-4.08242e-10	-2.15581e-12	-7.82522e-11
		0.02814	-4.08227e-10	-3.46493e-11	-1.22444e-10																0.02814	-4.08227e-10	-2.16703e-12	-7.82607e-11
		0.02816	-4.08212e-10	-3.46322e-11	-1.2246e-10																0.02816	-4.08212e-10	-2.17631e-12	-7.82706e-11
		0.02818	-4.08199e-10	-3.46159e-11	-1.22477e-10																0.02818	-4.08199e-10	-2.1833e-12	-7.82823e-11
		0.0282	-4.08186e-10	-3.46006e-11	-1.22494e-10																0.0282	-4.08186e-10	-2.18769e-12	-7.82958e-11
		0.02822	-4.08175e-10	-3.45862e-11	-1.22511e-10																0.02822	-4.08175e-10	-2.18926e-12	-7.83112e-11
		0.02824	-4.08166e-10	-3.45728e-11	-1.22528e-10																0.02824	-4.08166e-10	-2.18786e-12	-7.83286e-11
		0.02826	-4.08157e-10	-3.45604e-11	-1.22545e-10																0.02826	-4.08157e-10	-2.18341e-12	-7.8348e-11
		0.02828	-4.08151e-10	-3.45492e-11	-1.2256e-10																0.02828	-4.08151e-10	-2.17592e-12	-7.83693e-11
		0.0283	-4.08145e-10	-3.4539e-11	-1.22576e-10																0.0283	-4.08145e-10	-2.16545e-12	-7.83926e-11
		0.02832	-4.08141e-10	-3.45299e-11	-1.2259e-10																0.02832	-4.08141e-10	-2.15218e-12	-7.8418e-11
		0.02834	-4.08139e-10	-3.4522e-11	-1.22603e-10																0.02834	-4.08139e-10	-2.13632e-12	-7.84453e-11
		0.02836	-4.08137e-10	-3.45151e-11	-1.22616e-10																0.02836	-4.08137e-10	-2.11808e-12	-7.84747e-11
		0.02838	-4.08136e-10	-3.45096e-11	-1.22628e-10																0.02838	-4.08136e-10	-2.09761e-12	-7.85061e-11
		0.0284	-4.08137e-10	-3.45054e-11	-1.22638e-10																0.0284	-4.08137e-10	-2.07499e-12	-7.85396e-11
		0.02842	-4.08137e-10	-3.45027e-11	-1.22647e-10																0.02842	-4.08137e-10	-2.05014e-12	-7.85753e-11
		0.02844	-4.08139e-10	-3.45015e-11	-1.22655e-10																0.02844	-4.08139e-10	-2.02292e-12	-7.8613e-11
		0.02846	-4.08141e-10	-3.45018e-11	-1.22662e-10																0.02846	-4.08141e-10	-1.99313e-12	-7.86528e-11
		0.02848	-4.08144e-10	-3.45038e-11	-1.22668e-10																0.02848	-4.08144e-10	-1.96063e-12	-7.86946e-11
		0.0285	-4.08147e-10	-3.45073e-11	-1.22672e-10																0.0285	-4.08147e-10	-1.9254e-12	-7.87382e-11
		0.02852	-4.08152e-10	-3.45125e-11	-1.22676e-10																0.02852	-4.08152e-10	-1.88756e-12	-7.87836e-11
		0.02854	-4.08157e-10	-3.45192e-11	-1.22678e-10																0.02854	-4.08157e-10	-1.84733e-12	-7.88307e-11
		0.02856	-4.08163e-10	-3.45275e-11	-1.22679e-10																0.02856	-4.08163e-10	-1.80502e-12	-7.88796e-11
		0.02858	-4.0817e-10	-3.45372e-11	-1.22678e-10																0.02858	-4.0817e-10	-1.76094e-12	-7.89301e-11
		0.0286	-4.08179e-10	-3.45482e-11	-1.22677e-10																0.0286	-4.08179e-10	-1.71534e-12	-7.89822e-11
		0.02862	-4.08188e-10	-3.45604e-11	-1.22674e-10																0.02862	-4.08188e-10	-1.66843e-12	-7.90361e-11
		0.02864	-4.08198e-10	-3.45738e-11	-1.2267e-10																0.02864	-4.08198e-10	-1.62031e-12	-7.90917e-11
		0.02866	-4.0821e-10	-3.45884e-11	-1.22665e-10																0.02866	-4.0821e-10	-1.57106e-12	-7.91491e-11
		0.02868	-4.08222e-10	-3.46038e-11	-1.22659e-10																0.02868	-4.08222e-10	-1.52072e-12	-7.92083e-11
		0.0287	-4.08235e-10	-3.46202e-11	-1.22651e-10																0.0287	-4.08235e-10	-1.4694e-12	-7.92694e-11
		0.02872	-4.08248e-10	-3.46373e-11	-1.22643e-10																0.02872	-4.08248e-10	-1.4172e-12	-7.93321e-11
		0.02874	-4.08262e-10	-3.46551e-11	-1.22634e-10																0.02874	-4.08262e-10	-1.36426e-12	-7.93964e-11
		0.02876	-4.08277e-10	-3.46737e-11	-1.22624e-10																0.02876	-4.08277e-10	-1.31079e-12	-7.94623e-11
		0.02878	-4.08292e-10	-3.46928e-11	-1.22614e-10																0.02878	-4.08292e-10	-1.25702e-12	-7.95294e-11
		0.0288	-4.08309e-10	-3.47123e-11	-1.22602e-10																0.0288	-4.08309e-10	-1.20328e-12	-7.95977e-11
		0.02882	-4.08325e-10	-3.47322e-11	-1.22591e-10																0.02882	-4.08325e-10	-1.1499e-12	-7.96668e-11
		0.02884	-4.08342e-10	-3.4752e-11	-1.22578e-10																0.02884	-4.08342e-10	-1.0972e-12	-7.97367e-11
		0.02886	-4.0836e-10	-3.47717e-11	-1.22566e-10																0.02886	-4.0836e-10	-1.0454e-12	-7.98071e-11
		0.02888	-4.08379e-10	-3.4791e-11	-1.22553e-10																0.02888	-4.08379e-10	-9.94662e-13	-7.98777e-11
		0.0289	-4.08398e-10	-3.48098e-11	-1.2254e-10																0.0289	-4.08398e-10	-9.45099e-13	-7.99485e-11
		0.02892	-4.08418e-10	-3.48279e-11	-1.22528e-10																0.02892	-4.08418e-10	-8.96772e-13	-8.00192e-11
		0.02894	-4.08439e-10	-3.48454e-11	-1.22515e-10																0.02894	-4.08439e-10	-8.49723e-13	-8.00898e-11
		0.02896	-4.08461e-10	-3.48621e-11	-1.22504e-10																0.02896	-4.08461e-10	-8.03975e-13	-8.01599e-11
		0.02898	-4.08484e-10	-3.4878e-11	-1.22492e-10																0.02898	-4.08484e-10	-7.59534e-13	-8.02296e-11
		0.029	-4.08507e-10	-3.4893e-11	-1.22481e-10																0.029	-4.08507e-10	-7.1632e-13	-8.02986e-11
		0.02902	-4.08531e-10	-3.49071e-11	-1.22471e-10																0.02902	-4.08531e-10	-6.74179e-13	-8.03668e-11
		0.02904	-4.08556e-10	-3.49201e-11	-1.22461e-10																0.02904	-4.08556e-10	-6.3294e-13	-8.04341e-11
		0.02906	-4.08582e-10	-3.49321e-11	-1.22452e-10																0.02906	-4.08582e-10	-5.92456e-13	-8.05001e-11
		0.02908	-4.08608e-10	-3.4943e-11	-1.22444e-10																0.02908	-4.08608e-10	-5.52655e-13	-8.05648e-11
		0.0291	-4.08635e-10	-3.49528e-11	-1.22437e-10																0.0291	-4.08635e-10	-5.13537e-13	-8.06277e-11
		0.02912	-4.08662e-10	-3.49615e-11	-1.2243e-10																0.02912	-4.08662e-10	-4.75183e-13	-8.06888e-11
		0.02914	-4.08689e-10	-3.4969e-11	-1.22424e-10																0.02914	-4.08689e-10	-4.37694e-13	-8.07477e-11
		0.02916	-4.08717e-10	-3.49754e-11	-1.2242e-10																0.02916	-4.08717e-10	-4.01149e-13	-8.08043e-11
		0.02918	-4.08745e-10	-3.49807e-11	-1.22416e-10																0.02918	-4.08745e-10	-3.65625e-13	-8.08584e-11
		0.0292	-4.08773e-10	-3.49849e-11	-1.22414e-10																0.0292	-4.08773e-10	-3.31203e-13	-8.09099e-11
		0.02922	-4.08802e-10	-3.4988e-11	-1.22413e-10																0.02922	-4.08802e-10	-2.9796e-13	-8.09585e-11
		0.02924	-4.08831e-10	-3.49901e-11	-1.22412e-10																0.02924	-4.08831e-10	-2.65955e-13	-8.10041e-11
		0.02926	-4.08861e-10	-3.49913e-11	-1.22413e-10																0.02926	-4.08861e-10	-2.35249e-13	-8.10466e-11
		0.02928	-4.08892e-10	-3.49918e-11	-1.22415e-10																0.02928	-4.08892e-10	-2.05889e-13	-8.10858e-11
		0.0293	-4.08923e-10	-3.49916e-11	-1.22418e-10																0.0293	-4.08923e-10	-1.77917e-13	-8.11214e-11
		0.02932	-4.08954e-10	-3.49906e-11	-1.22422e-10																0.02932	-4.08954e-10	-1.51404e-13	-8.11536e-11
		0.02934	-4.08985e-10	-3.49889e-11	-1.22427e-10																0.02934	-4.08985e-10	-1.26442e-13	-8.11819e-11
		0.02936	-4.09017e-10	-3.49864e-11	-1.22433e-10																0.02936	-4.09017e-10	-1.03088e-13	-8.12064e-11
		0.02938	-4.09047e-10	-3.49828e-11	-1.22441e-10																0.02938	-4.09047e-10	-8.13935e-14	-8.1227e-11
		0.0294	-4.09077e-10	-3.49781e-11	-1.22449e-10																0.0294	-4.09077e-10	-6.1382e-14	-8.12433e-11
		0.02942	-4.09107e-10	-3.49721e-11	-1.22459e-10																0.02942	-4.09107e-10	-4.29831e-14	-8.12553e-11
		0.02944	-4.09136e-10	-3.49648e-11	-1.22469e-10																0.02944	-4.09136e-10	-2.60395e-14	-8.12628e-11
		0.02946	-4.09165e-10	-3.49562e-11	-1.2248e-10																0.02946	-4.09165e-10	-1.0308e-14	-8.12656e-11
		0.02948	-4.09193e-10	-3.49462e-11	-1.22493e-10																0.02948	-4.09193e-10	4.48744e-15	-8.12638e-11
		0.0295	-4.0922e-10	-3.49349e-11	-1.22505e-10																0.0295	-4.0922e-10	1.86142e-14	-8.12573e-11
		0.02952	-4.09247e-10	-3.49225e-11	-1.22519e-10																0.02952	-4.09247e-10	3.23173e-14	-8.12463e-11
		0.02954	-4.09272e-10	-3.49092e-11	-1.22532e-10																0.02954	-4.09272e-10	4.58131e-14	-8.12307e-11
		0.02956	-4.09297e-10	-3.48951e-11	-1.22546e-10																0.02956	-4.09297e-10	5.92825e-14	-8.12107e-11
		0.02958	-4.0932e-10	-3.48804e-11	-1.22559e-10																0.02958	-4.0932e-10	7.2864e-14	-8.11867e-11
		0.0296	-4.09343e-10	-3.48654e-11	-1.22572e-10																0.0296	-4.09343e-10	8.6689e-14	-8.11586e-11
		0.02962	-4.09364e-10	-3.48503e-11	-1.22585e-10																0.02962	-4.09364e-10	1.00887e-13	-8.11267e-11
		0.02964	-4.09384e-10	-3.48353e-11	-1.22597e-10																0.02964	-4.09384e-10	1.1556e-13	-8.10912e-11
		0.02966	-4.09403e-10	-3.48206e-11	-1.22609e-10																0.02966	-4.09403e-10	1.30793e-13	-8.10523e-11
		0.02968	-4.0942e-10	-3.48062e-11	-1.22619e-10																0.02968	-4.0942e-10	1.46641e-13	-8.10103e-11
		0.0297	-4.09436e-10	-3.47923e-11	-1.22628e-10																0.0297	-4.09436e-10	1.63107e-13	-8.09653e-11
		0.02972	-4.09451e-10	-3.4779e-11	-1.22636e-10																0.02972	-4.09451e-10	1.80138e-13	-8.09178e-11
		0.02974	-4.09464e-10	-3.47664e-11	-1.22643e-10																0.02974	-4.09464e-10	1.97621e-13	-8.08679e-11
		0.02976	-4.09475e-10	-3.47548e-11	-1.22648e-10																0.02976	-4.09475e-10	2.15385e-13	-8.08158e-11
		0.02978	-4.09484e-10	-3.47442e-11	-1.22651e-10																0.02978	-4.09484e-10	2.33221e-13	-8.07621e-11
		0.0298	-4.09491e-10	-3.47349e-11	-1.22653e-10																0.0298	-4.09491e-10	2.50906e-13	-8.07069e-11
		0.02982	-4.09496e-10	-3.47268e-11	-1.22653e-10																0.02982	-4.09496e-10	2.68215e-13	-8.06505e-11
		0.02984	-4.09499e-10	-3.472e-11	-1.22651e-10																0.02984	-4.09499e-10	2.84957e-13	-8.05934e-11
		0.02986	-4.095e-10	-3.47147e-11	-1.22648e-10																0.02986	-4.095e-10	3.00951e-13	-8.05358e-11
		0.02988	-4.095e-10	-3.47106e-11	-1.22643e-10																0.02988	-4.095e-10	3.16004e-13	-8.0478e-11
		0.0299	-4.09497e-10	-3.47078e-11	-1.22637e-10																0.0299	-4.09497e-10	3.29933e-13	-8.04203e-11
		0.02992	-4.09493e-10	-3.47064e-11	-1.2263e-10																0.02992	-4.09493e-10	3.42577e-13	-8.03628e-11
		0.02994	-4.09488e-10	-3.47064e-11	-1.22622e-10																0.02994	-4.09488e-10	3.53827e-13	-8.03057e-11
		0.02996	-4.09481e-10	-3.47078e-11	-1.22613e-10																0.02996	-4.09481e-10	3.63615e-13	-8.02491e-11
		0.02998	-4.09472e-10	-3.47107e-11	-1.22603e-10																0.02998	-4.09472e-10	3.71892e-13	-8.0193e-11
		0.03	-4.09461e-10	-3.47151e-11	-1.22593e-10																0.03	-4.09461e-10	3.78645e-13	-8.01376e-11
		0.03002	-4.09449e-10	-3.4721e-11	-1.22582e-10																0.03002	-4.09449e-10	3.83894e-13	-8.0083e-11
		0.03004	-4.09434e-10	-3.47285e-11	-1.22571e-10																0.03004	-4.09434e-10	3.87666e-13	-8.00291e-11
		0.03006	-4.09419e-10	-3.47374e-11	-1.22559e-10																0.03006	-4.09419e-10	3.89982e-13	-7.99761e-11
		0.03008	-4.09401e-10	-3.47478e-11	-1.22548e-10																0.03008	-4.09401e-10	3.90853e-13	-7.9924e-11
		0.0301	-4.09381e-10	-3.47596e-11	-1.22536e-10																0.0301	-4.09381e-10	3.90227e-13	-7.98729e-11
		0.03012	-4.0936e-10	-3.47729e-11	-1.22525e-10																0.03012	-4.0936e-10	3.87982e-13	-7.98228e-11
		0.03014	-4.09337e-10	-3.47875e-11	-1.22513e-10																0.03014	-4.09337e-10	3.83921e-13	-7.97738e-11
		0.03016	-4.09312e-10	-3.48035e-11	-1.22501e-10																0.03016	-4.09312e-10	3.77794e-13	-7.97259e-11
		0.03018	-4.09285e-10	-3.48208e-11	-1.22489e-10																0.03018	-4.09285e-10	3.6933e-13	-7.96792e-11
		0.0302	-4.09257e-10	-3.48392e-11	-1.22477e-10																0.0302	-4.09257e-10	3.58251e-13	-7.96338e-11
		0.03022	-4.09226e-10	-3.48587e-11	-1.22465e-10																0.03022	-4.09226e-10	3.44286e-13	-7.95897e-11
		0.03024	-4.09194e-10	-3.4879e-11	-1.22453e-10																0.03024	-4.09194e-10	3.27219e-13	-7.9547e-11
		0.03026	-4.0916e-10	-3.49e-11	-1.22441e-10																0.03026	-4.0916e-10	3.06907e-13	-7.95059e-11
		0.03028	-4.09124e-10	-3.49215e-11	-1.22429e-10																0.03028	-4.09124e-10	2.83289e-13	-7.94665e-11
		0.0303	-4.09087e-10	-3.49434e-11	-1.22418e-10																0.0303	-4.09087e-10	2.5638e-13	-7.9429e-11
		0.03032	-4.09049e-10	-3.49655e-11	-1.22406e-10																0.03032	-4.09049e-10	2.26238e-13	-7.93935e-11
		0.03034	-4.0901e-10	-3.49879e-11	-1.22394e-10																0.03034	-4.0901e-10	1.92935e-13	-7.93602e-11
		0.03036	-4.08971e-10	-3.50104e-11	-1.22383e-10																0.03036	-4.08971e-10	1.56526e-13	-7.93292e-11
		0.03038	-4.08933e-10	-3.50329e-11	-1.22372e-10																0.03038	-4.08933e-10	1.17065e-13	-7.93006e-11
		0.0304	-4.08895e-10	-3.50554e-11	-1.2236e-10																0.0304	-4.08895e-10	7.45904e-14	-7.92745e-11
		0.03042	-4.08858e-10	-3.50779e-11	-1.22349e-10																0.03042	-4.08858e-10	2.9104e-14	-7.92512e-11
		0.03044	-4.08823e-10	-3.51002e-11	-1.22338e-10																0.03044	-4.08823e-10	-1.93905e-14	-7.92308e-11
		0.03046	-4.08789e-10	-3.51222e-11	-1.22326e-10																0.03046	-4.08789e-10	-7.09117e-14	-7.92135e-11
		0.03048	-4.08756e-10	-3.51439e-11	-1.22315e-10																0.03048	-4.08756e-10	-1.25483e-13	-7.91996e-11
		0.0305	-4.08725e-10	-3.5165e-11	-1.22303e-10																0.0305	-4.08725e-10	-1.83092e-13	-7.91894e-11
		0.03052	-4.08695e-10	-3.51854e-11	-1.22291e-10																0.03052	-4.08695e-10	-2.43722e-13	-7.91829e-11
		0.03054	-4.08667e-10	-3.52051e-11	-1.22279e-10																0.03054	-4.08667e-10	-3.0732e-13	-7.91803e-11
		0.03056	-4.0864e-10	-3.52238e-11	-1.22267e-10																0.03056	-4.0864e-10	-3.73816e-13	-7.91816e-11
		0.03058	-4.08614e-10	-3.52417e-11	-1.22255e-10																0.03058	-4.08614e-10	-4.43164e-13	-7.91867e-11
		0.0306	-4.08589e-10	-3.52587e-11	-1.22242e-10																0.0306	-4.08589e-10	-5.15383e-13	-7.91953e-11
		0.03062	-4.08566e-10	-3.5275e-11	-1.2223e-10																0.03062	-4.08566e-10	-5.90541e-13	-7.92074e-11
		0.03064	-4.08543e-10	-3.52908e-11	-1.22217e-10																0.03064	-4.08543e-10	-6.68767e-13	-7.92227e-11
		0.03066	-4.08522e-10	-3.53061e-11	-1.22204e-10																0.03066	-4.08522e-10	-7.502e-13	-7.92409e-11
		0.03068	-4.08501e-10	-3.53212e-11	-1.22192e-10																0.03068	-4.08501e-10	-8.3494e-13	-7.92619e-11
		0.0307	-4.08482e-10	-3.53361e-11	-1.2218e-10																0.0307	-4.08482e-10	-9.23035e-13	-7.92852e-11
		0.03072	-4.08464e-10	-3.53509e-11	-1.22168e-10																0.03072	-4.08464e-10	-1.01446e-12	-7.93108e-11
		0.03074	-4.08447e-10	-3.53656e-11	-1.22157e-10																0.03074	-4.08447e-10	-1.10912e-12	-7.93385e-11
		0.03076	-4.08432e-10	-3.53803e-11	-1.22146e-10																0.03076	-4.08432e-10	-1.2068e-12	-7.93682e-11
		0.03078	-4.08418e-10	-3.5395e-11	-1.22136e-10																0.03078	-4.08418e-10	-1.30718e-12	-7.93999e-11
		0.0308	-4.08405e-10	-3.54098e-11	-1.22127e-10																0.0308	-4.08405e-10	-1.40986e-12	-7.94332e-11
		0.03082	-4.08393e-10	-3.54246e-11	-1.22118e-10																0.03082	-4.08393e-10	-1.51441e-12	-7.94682e-11
		0.03084	-4.08382e-10	-3.54396e-11	-1.22111e-10																0.03084	-4.08382e-10	-1.62041e-12	-7.95047e-11
		0.03086	-4.08371e-10	-3.54547e-11	-1.22104e-10																0.03086	-4.08371e-10	-1.72751e-12	-7.95426e-11
		0.03088	-4.08362e-10	-3.547e-11	-1.22098e-10																0.03088	-4.08362e-10	-1.83542e-12	-7.95817e-11
		0.0309	-4.08352e-10	-3.54855e-11	-1.22093e-10																0.0309	-4.08352e-10	-1.94394e-12	-7.9622e-11
		0.03092	-4.08343e-10	-3.55015e-11	-1.22089e-10																0.03092	-4.08343e-10	-2.05291e-12	-7.96633e-11
[truncated: 73,753 more rows]
